# Supplementary material for: The Systemin Signaling Cascade As Derived from Time Course Analyses of the Systemin-responsive Phosphoproteome
Source: PubMed Central journal article supplement (PMC6683004; doi:10.1074/mcp.ra119.001367), 2019-05-28

**Supplementary Figure 2:** Representative annotated spectra of identified phosphopeptides under systemin,A17 and water treatment as exported from MaxQuant.

Raw file Scan Method Score m/z  
 sys\_00\_1 12829 FTMS; HCD 62.94 769.86

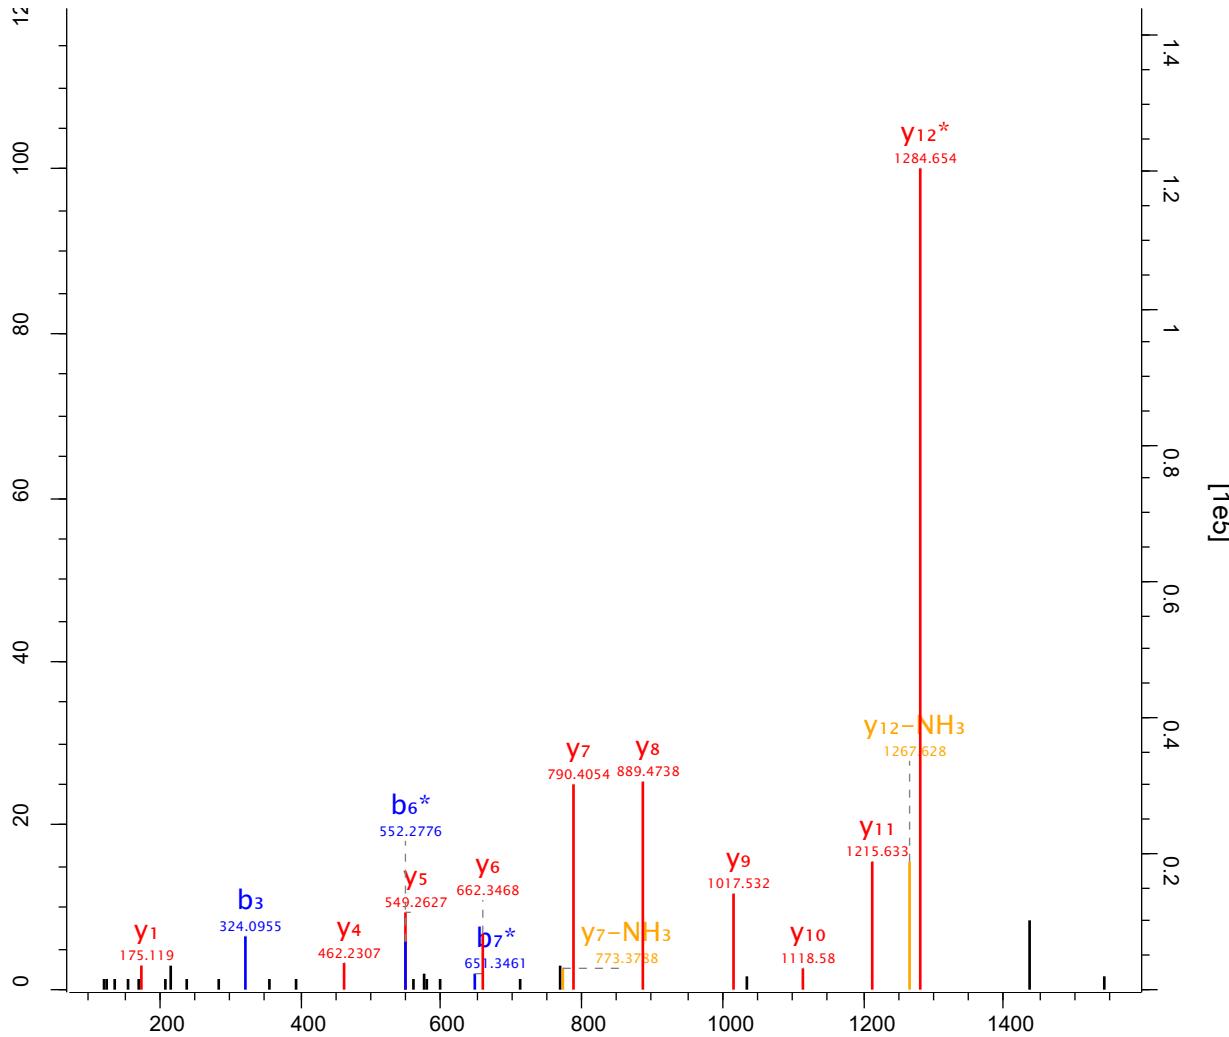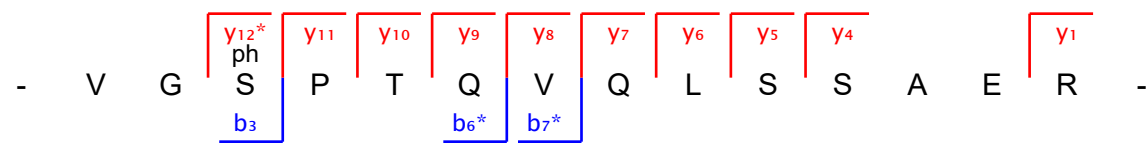

Raw file Scan Method Score m/z  
 sys\_00\_1 1551 FTMS; HCD 62.46 480.19

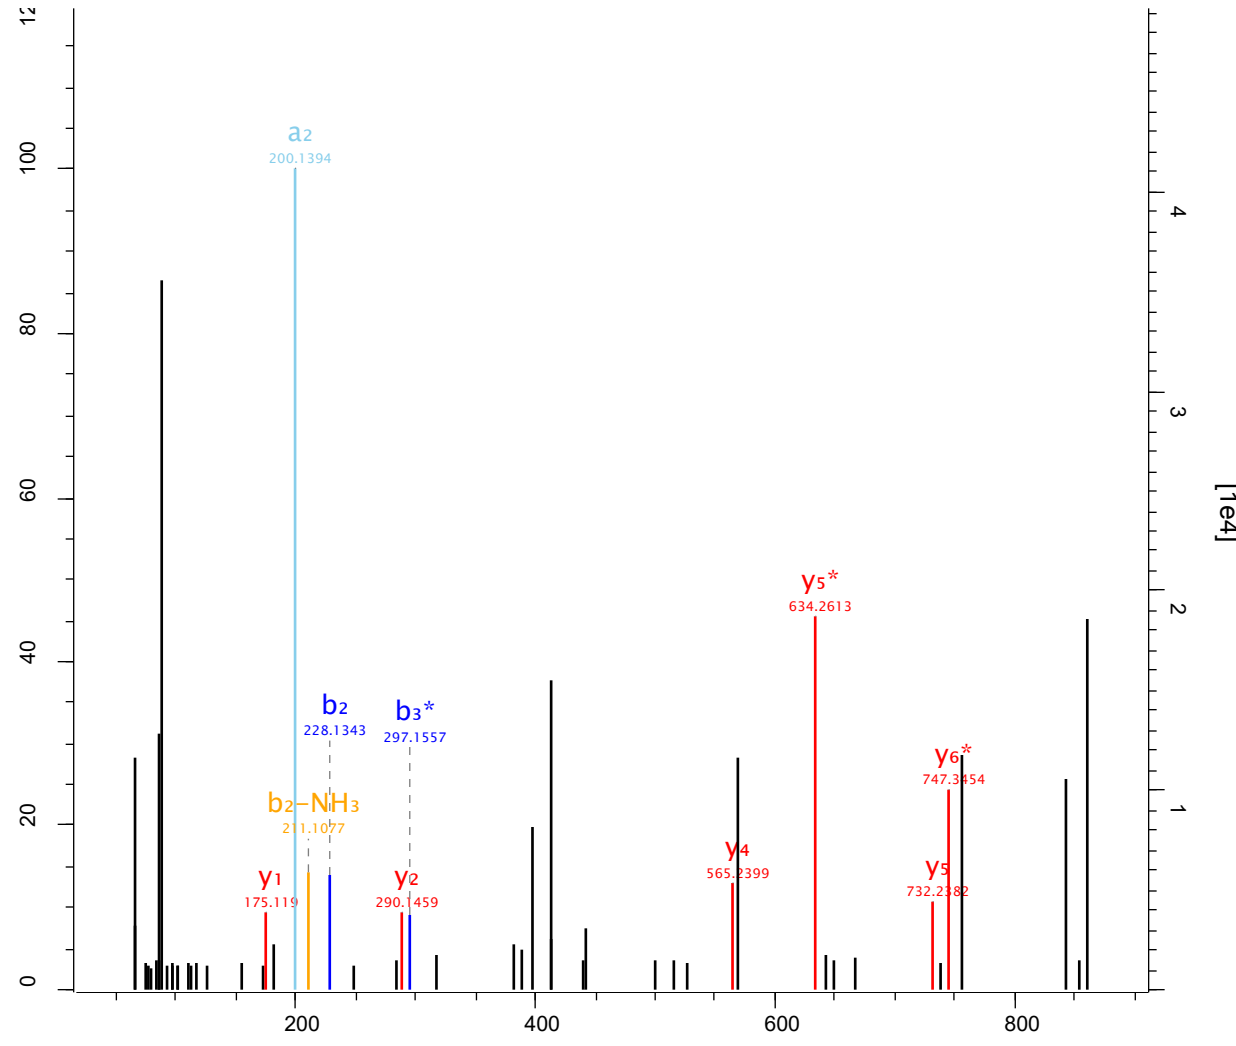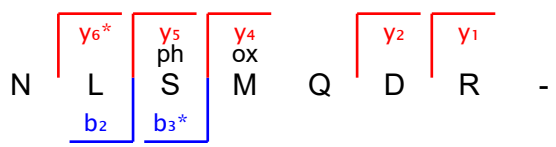

Raw file Scan Method Score m/z  
 sys\_00\_1 1755 FTMS; HCD 50.08 721.8

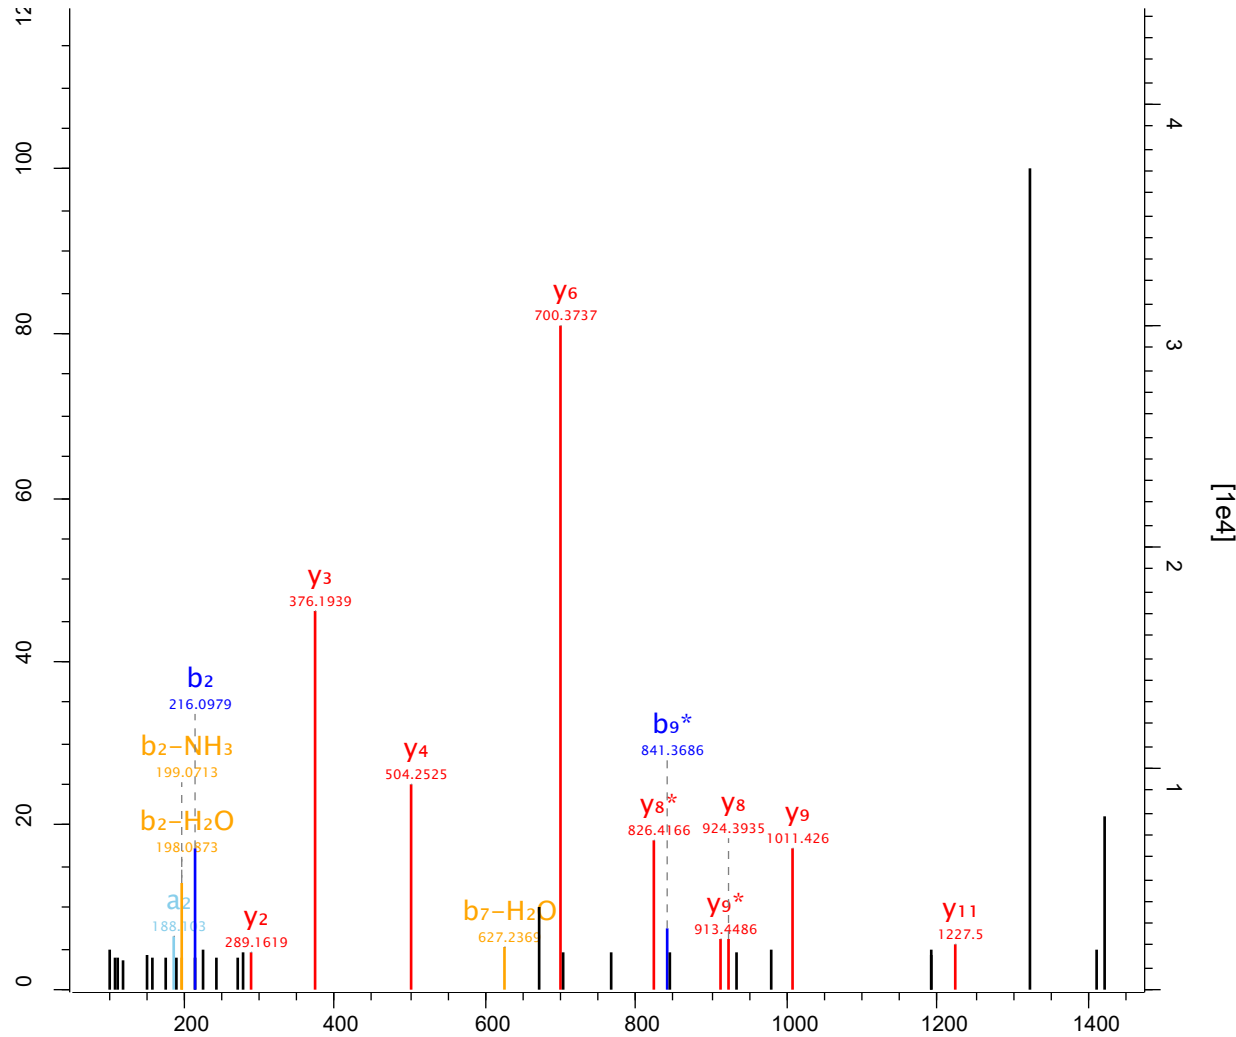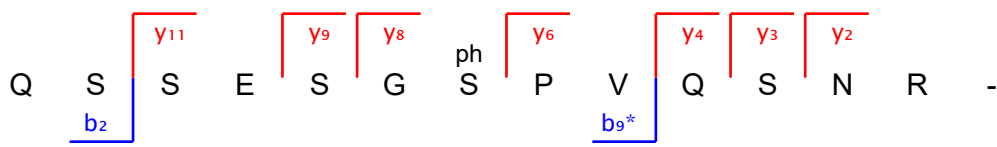



Raw file Scan Method Score m/z  
 sys\_00\_1 2700 FTMS; HCD 51.28 506.73

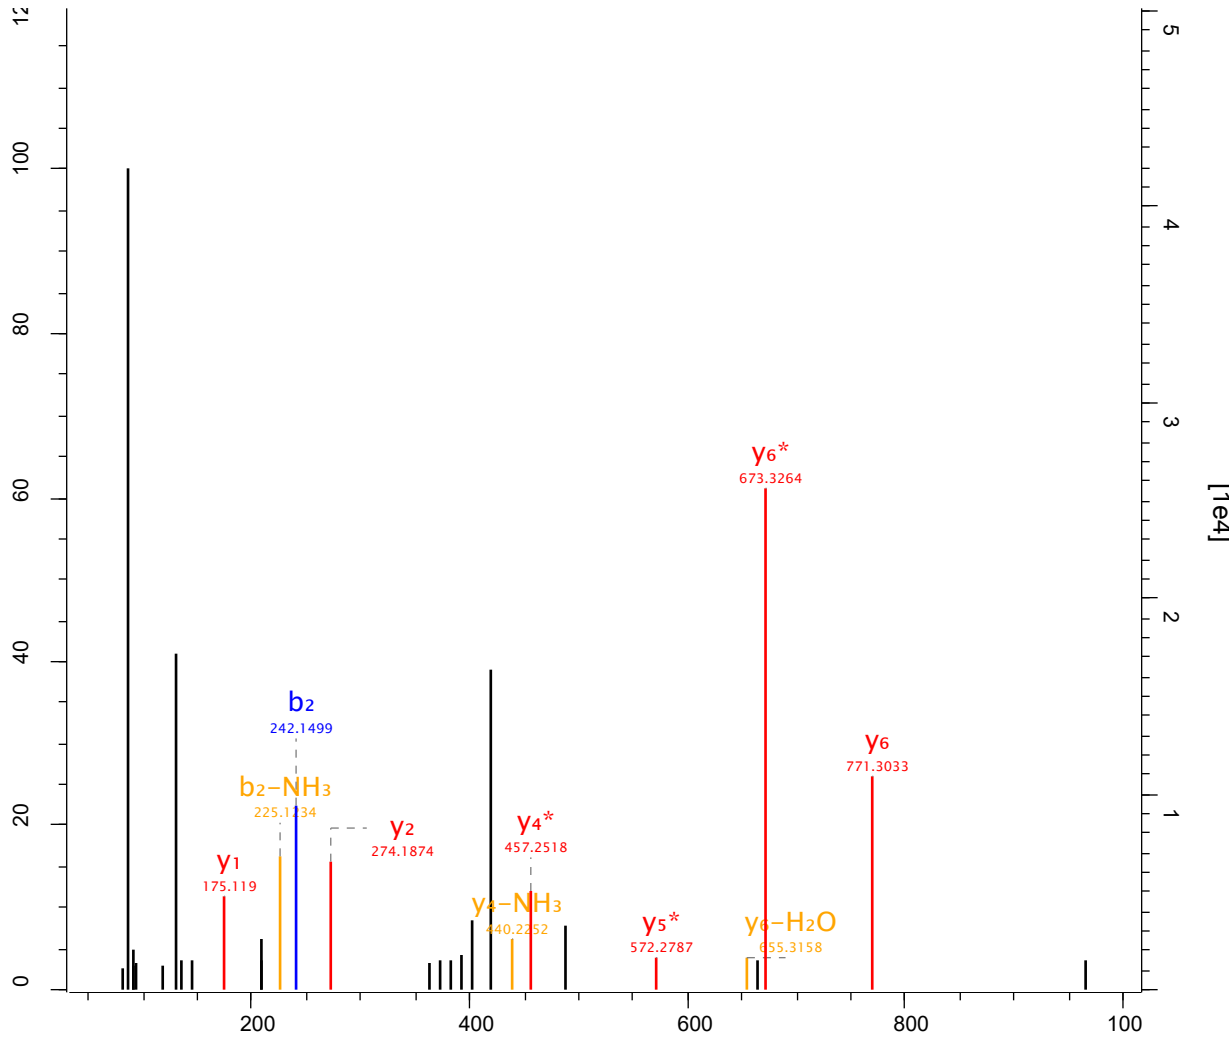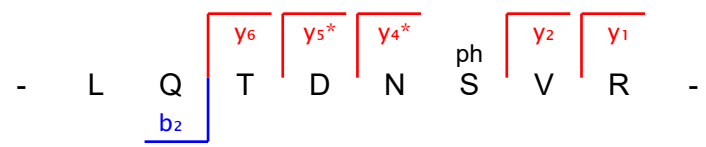

Raw file Scan Method Score m/z  
 sys\_00\_1 2897 FTMS; HCD 46.8 680.74

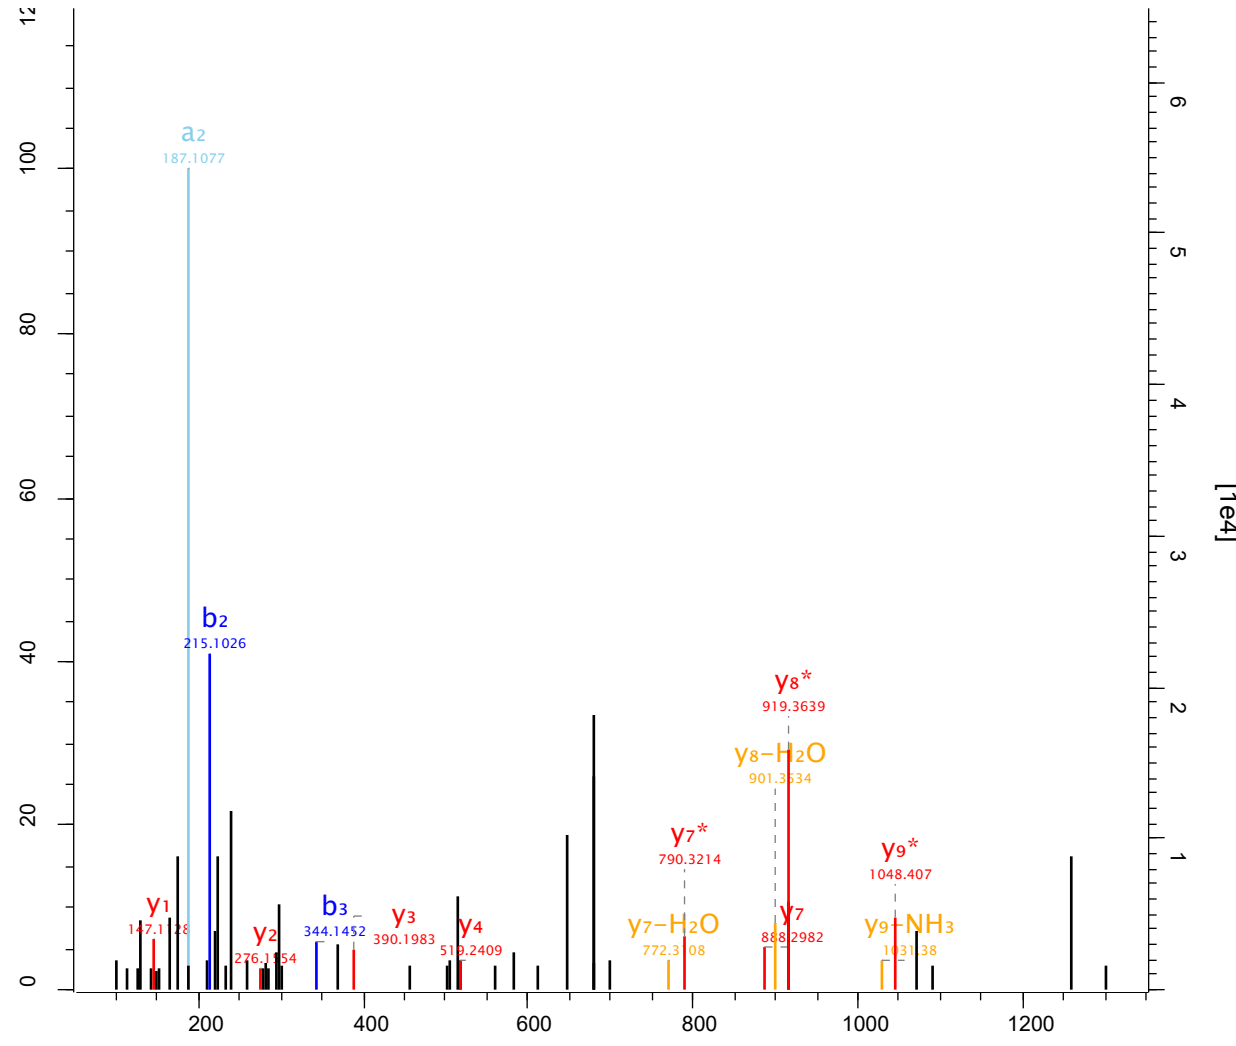

- D V E E S S D E N E K -  
 b2 b3 y9\* y8\* y7ph y4 y3 y2 y1

Raw file Scan Method Score m/z  
 sys\_00\_1 3740 FTMS; HCD 139.31 486.7

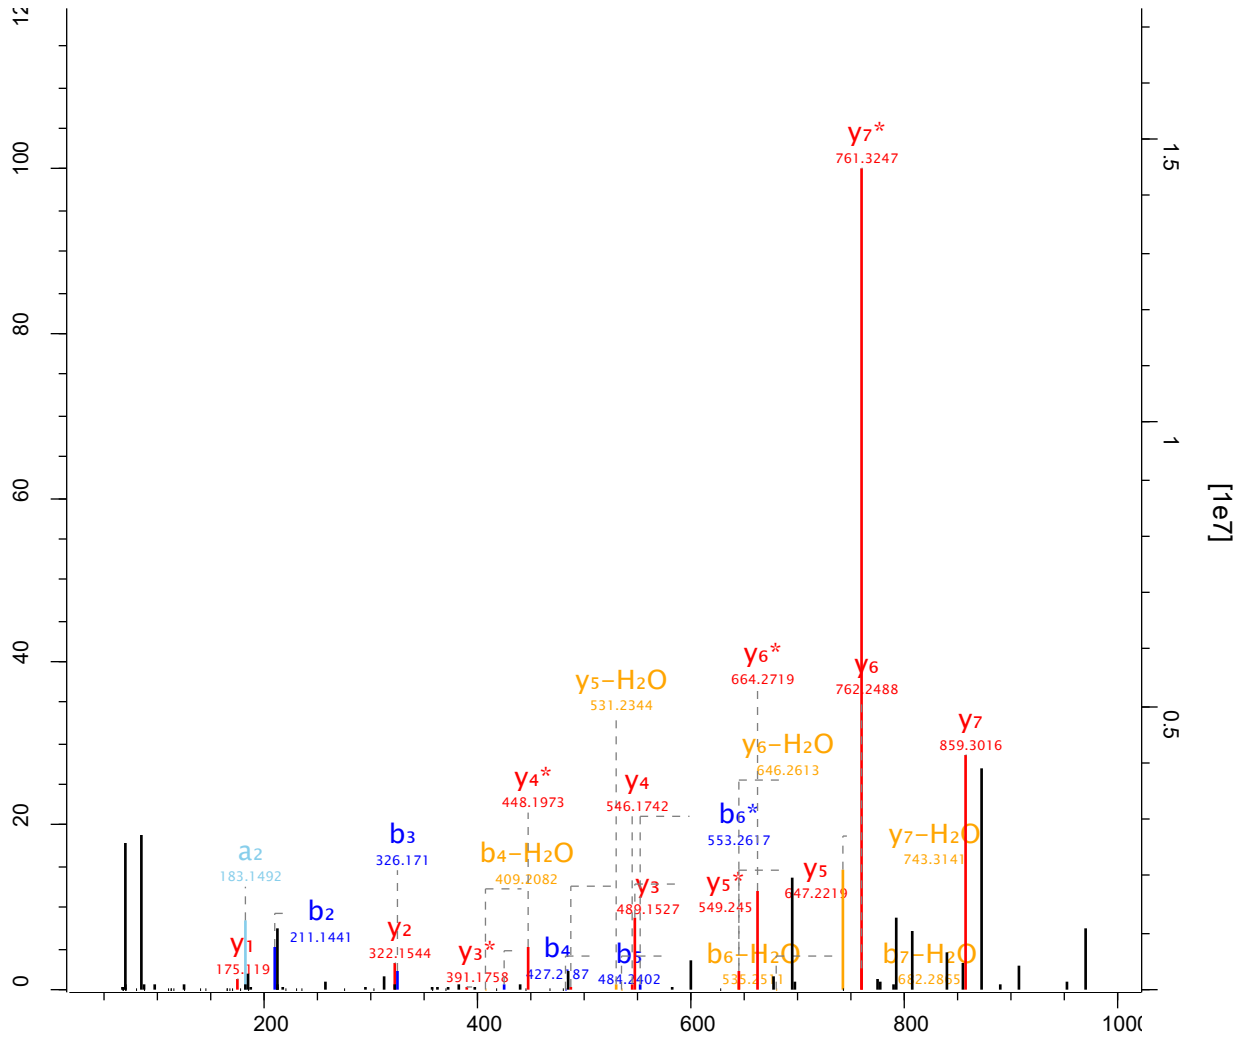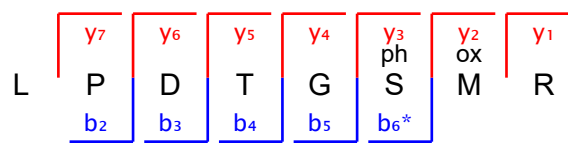

Raw file Scan Method Score m/z  
 sys\_00\_1 3784 FTMS; HCD 54.09 616.7

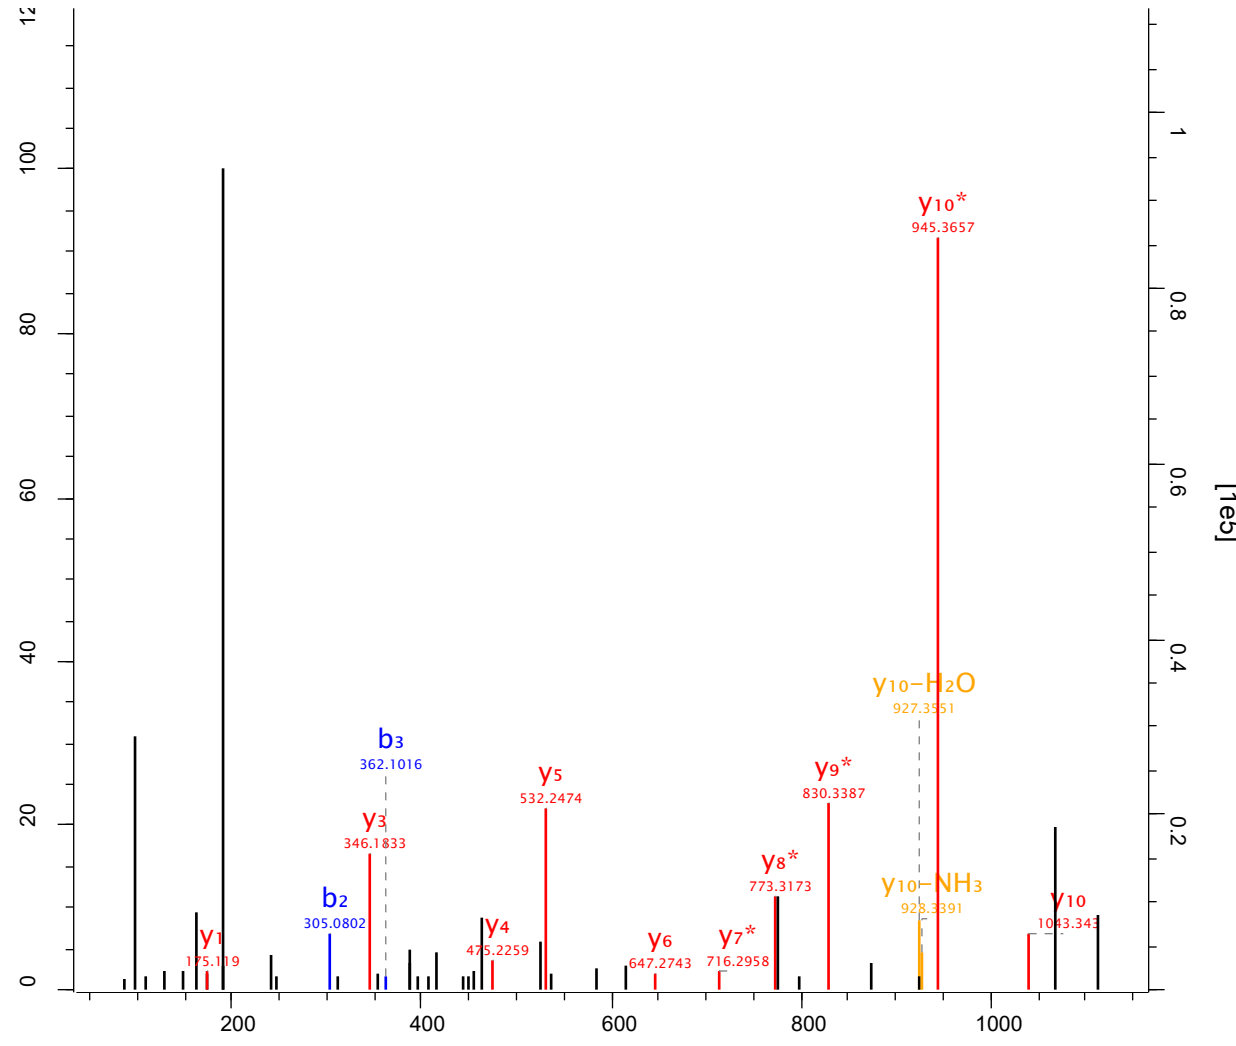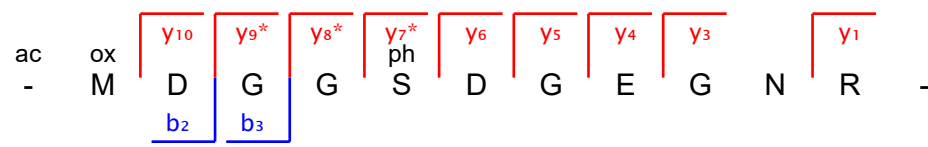

| Raw file | Scan | Method    | Score | m/z   |
|----------|------|-----------|-------|-------|
| sys_00_1 | 4842 | FTMS; HCD | 68.66 | 421.7 |

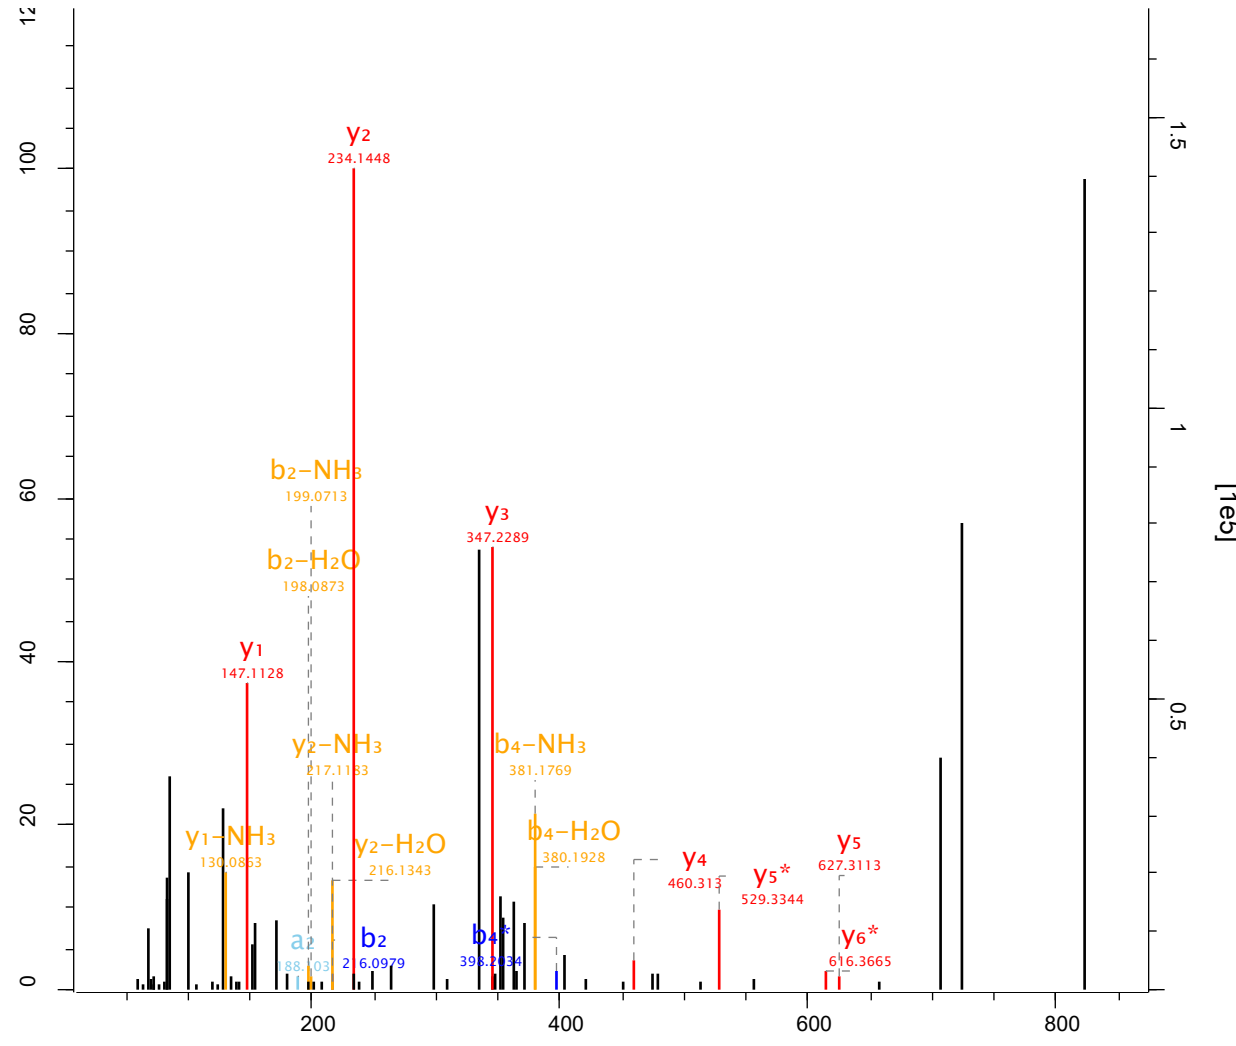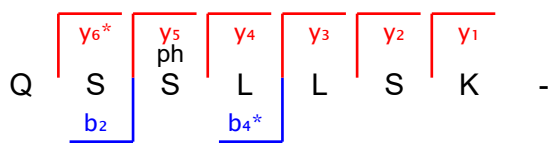

Raw file Scan Method Score m/z  
 sys\_00\_1 5069 FTMS; HCD 51.29 522.73

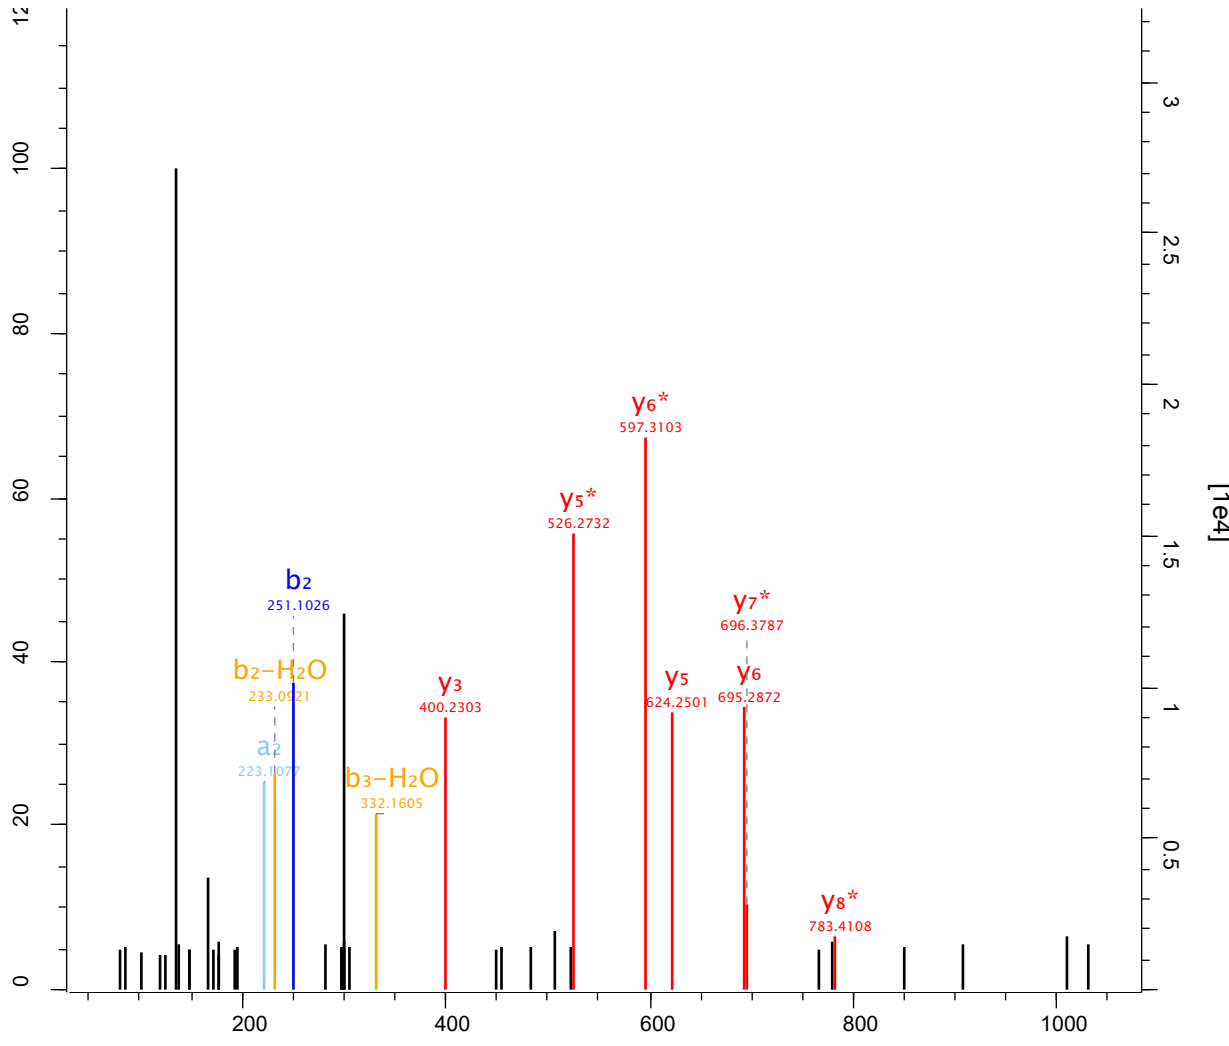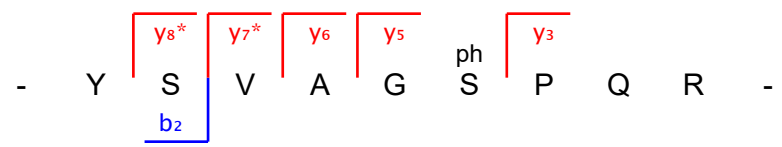

Raw file Scan Method Score m/z  
 sys\_00\_1 6749 FTMS; HCD 114.86 498.23

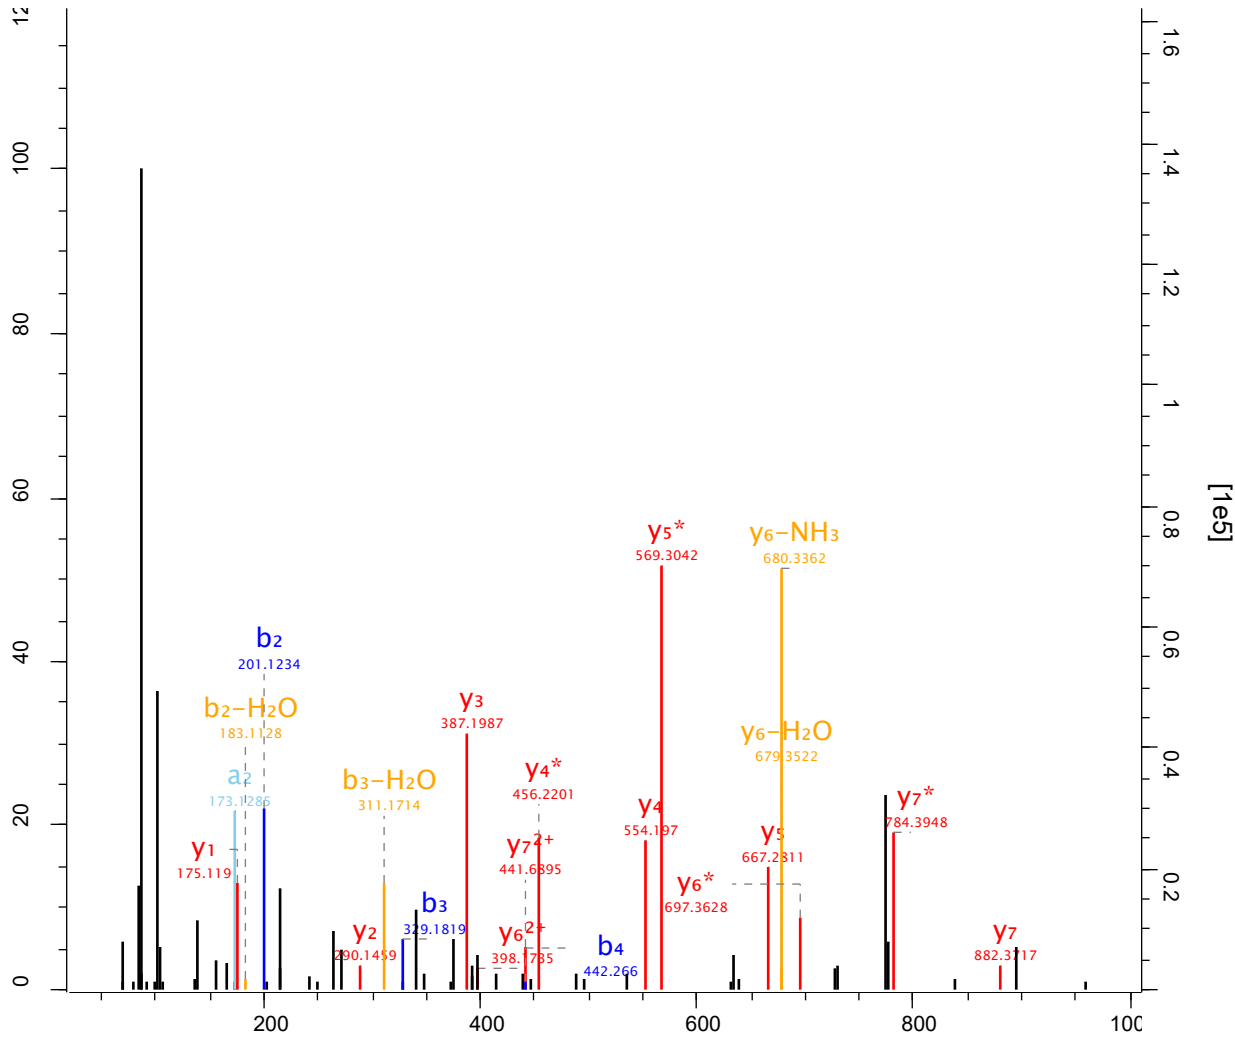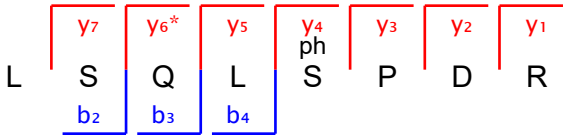

Raw file Scan Method Score m/z  
 sys\_00\_1 7359 FTMS; HCD 115.57 430.7

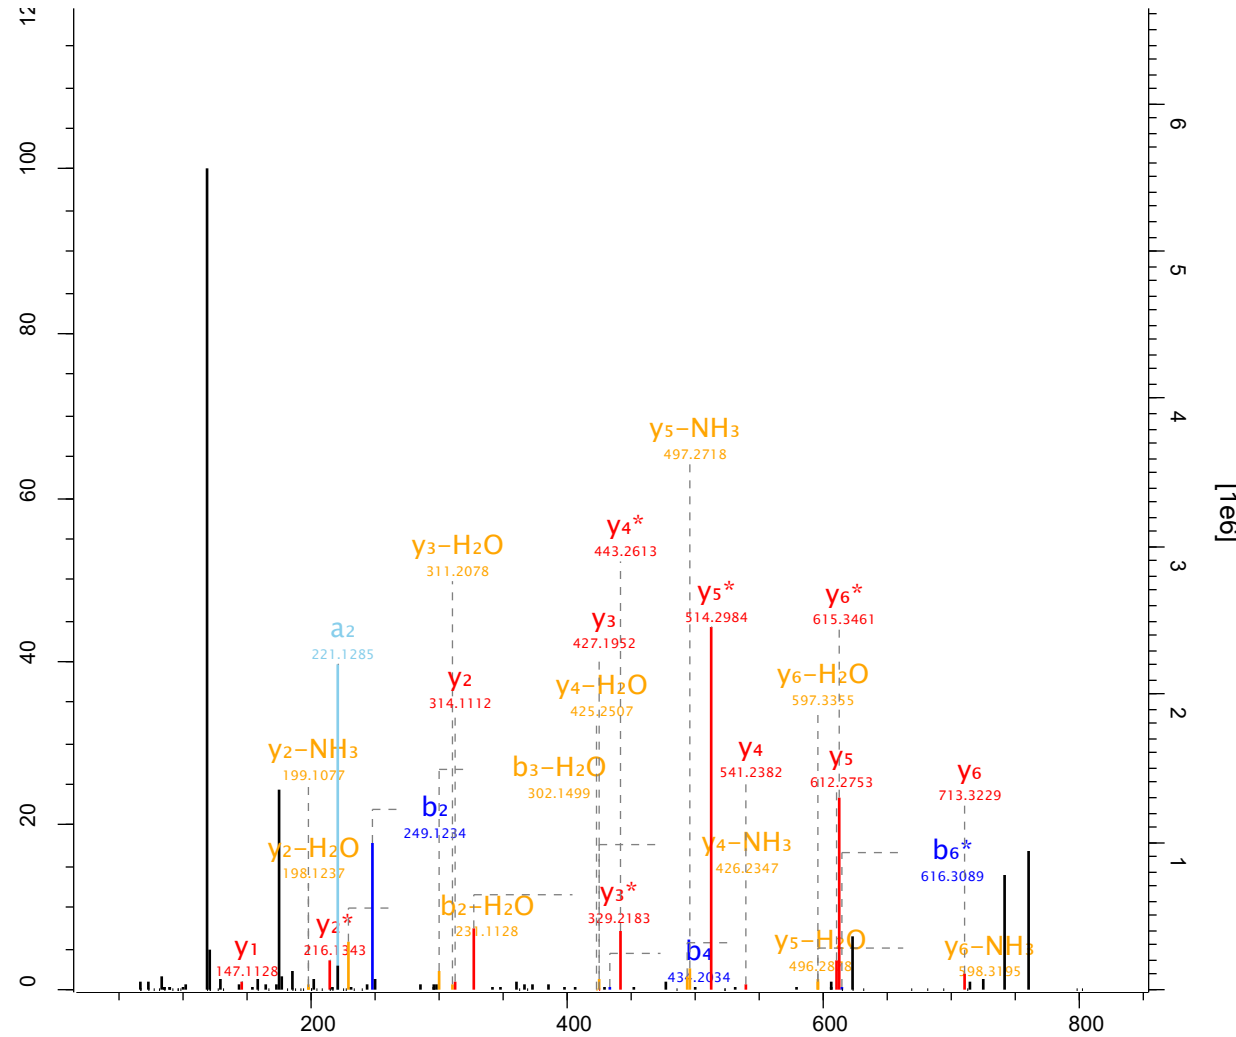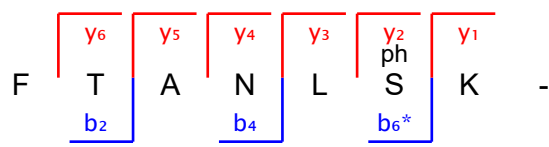



Raw file Scan Method Score m/z  
 sys\_00\_1 7613 FTMS; HCD 81.63 650.75

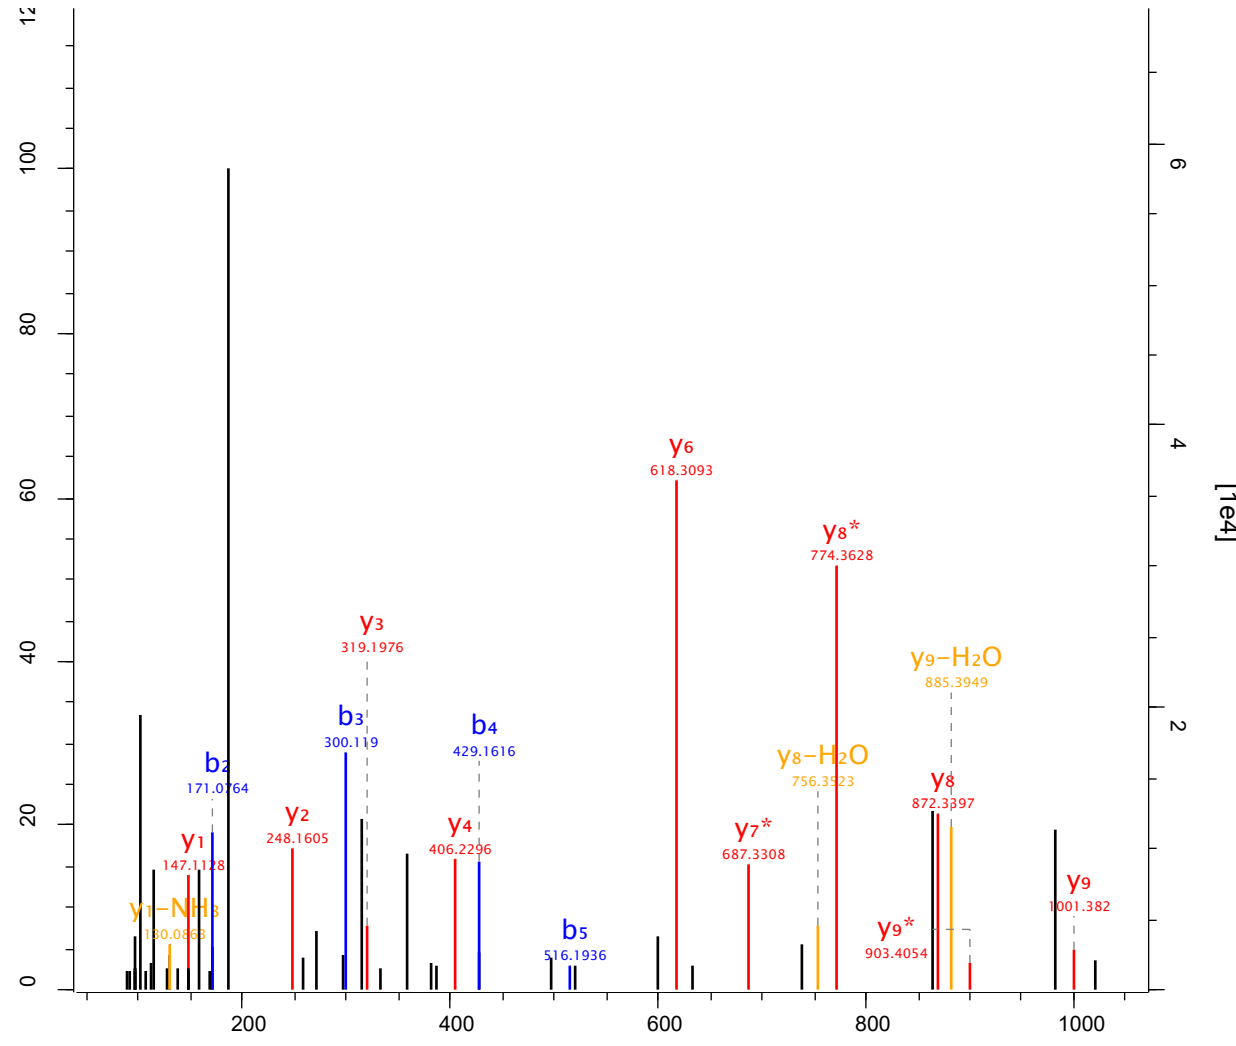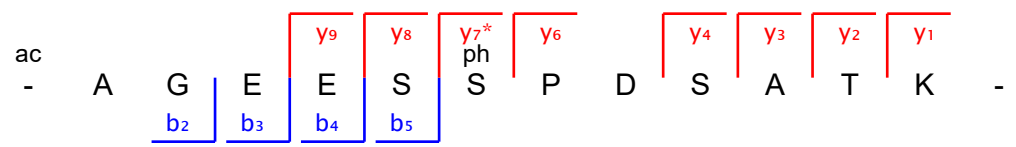

Raw file Scan Method Score m/z  
 sys\_00\_1 8284 FTMS; HCD 97.69 601.75

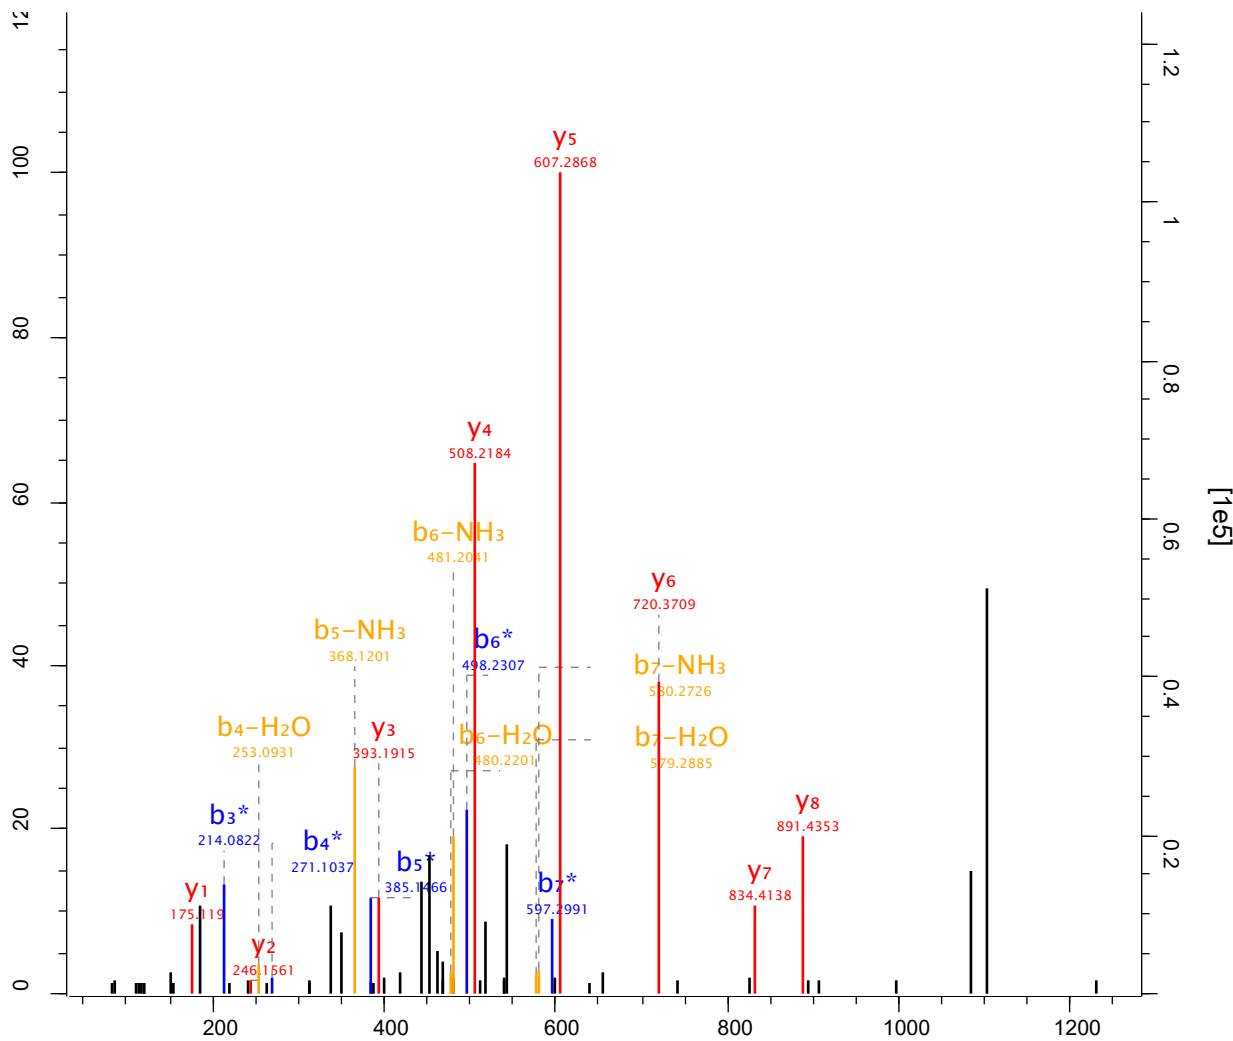

- G ph S S G N L V D M A R -

y8
y7
y6
y5
y4
y3  
OX
y2
y1

b3\*
b4\*
b5\*
b6\*
b7\*

Raw file Scan Method Score m/z  
 sys\_00\_1 8470 FTMS; HCD 83.18 628.76

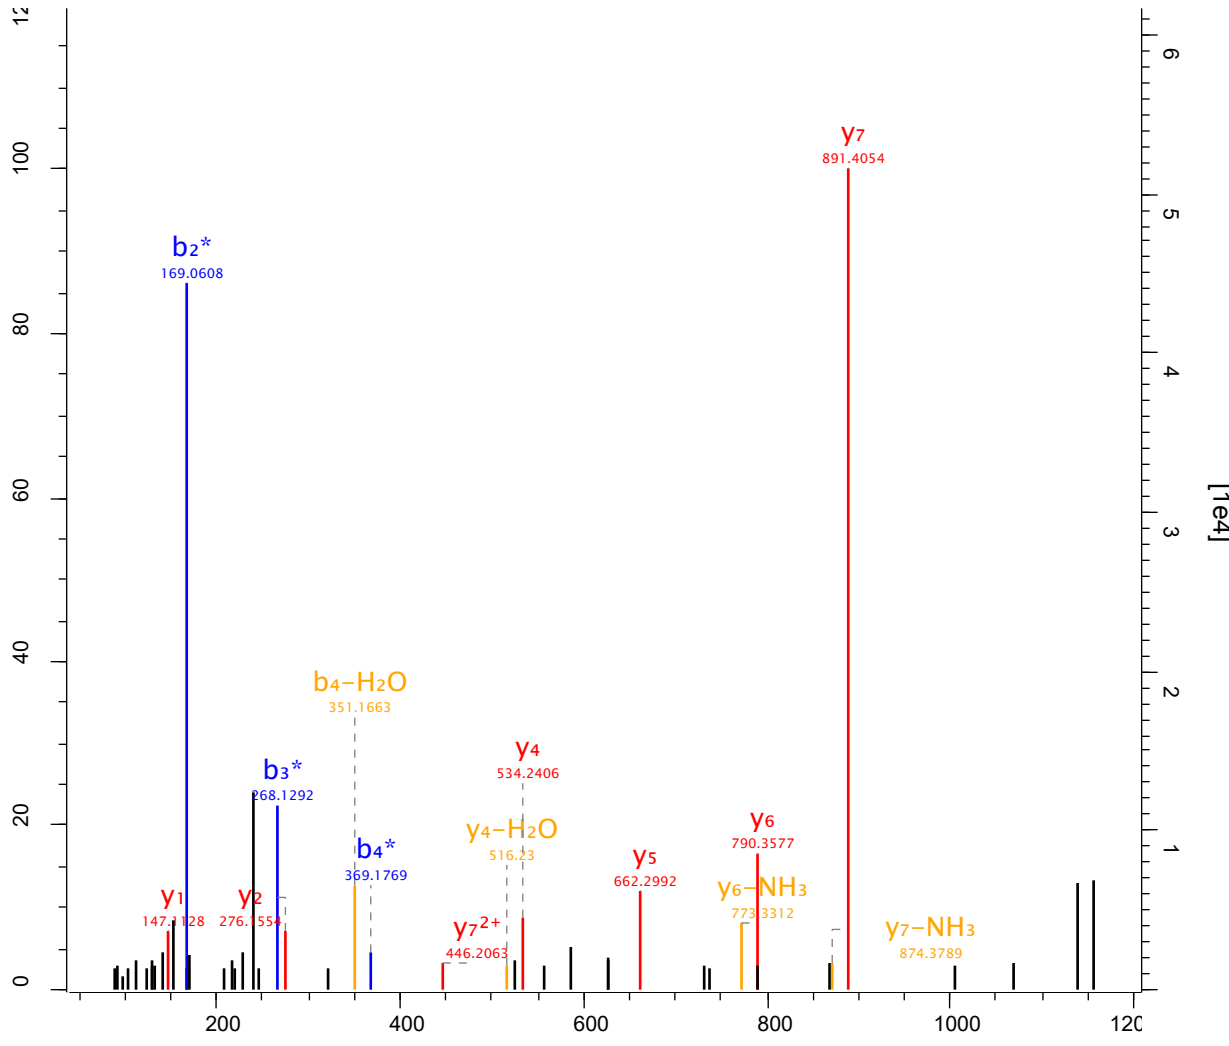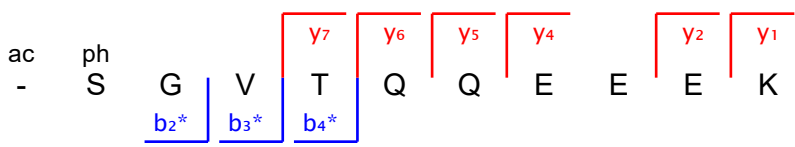

Raw file Scan Method Score m/z  
 sys\_00\_2 10058 FTMS; HCD 67.11 483.18

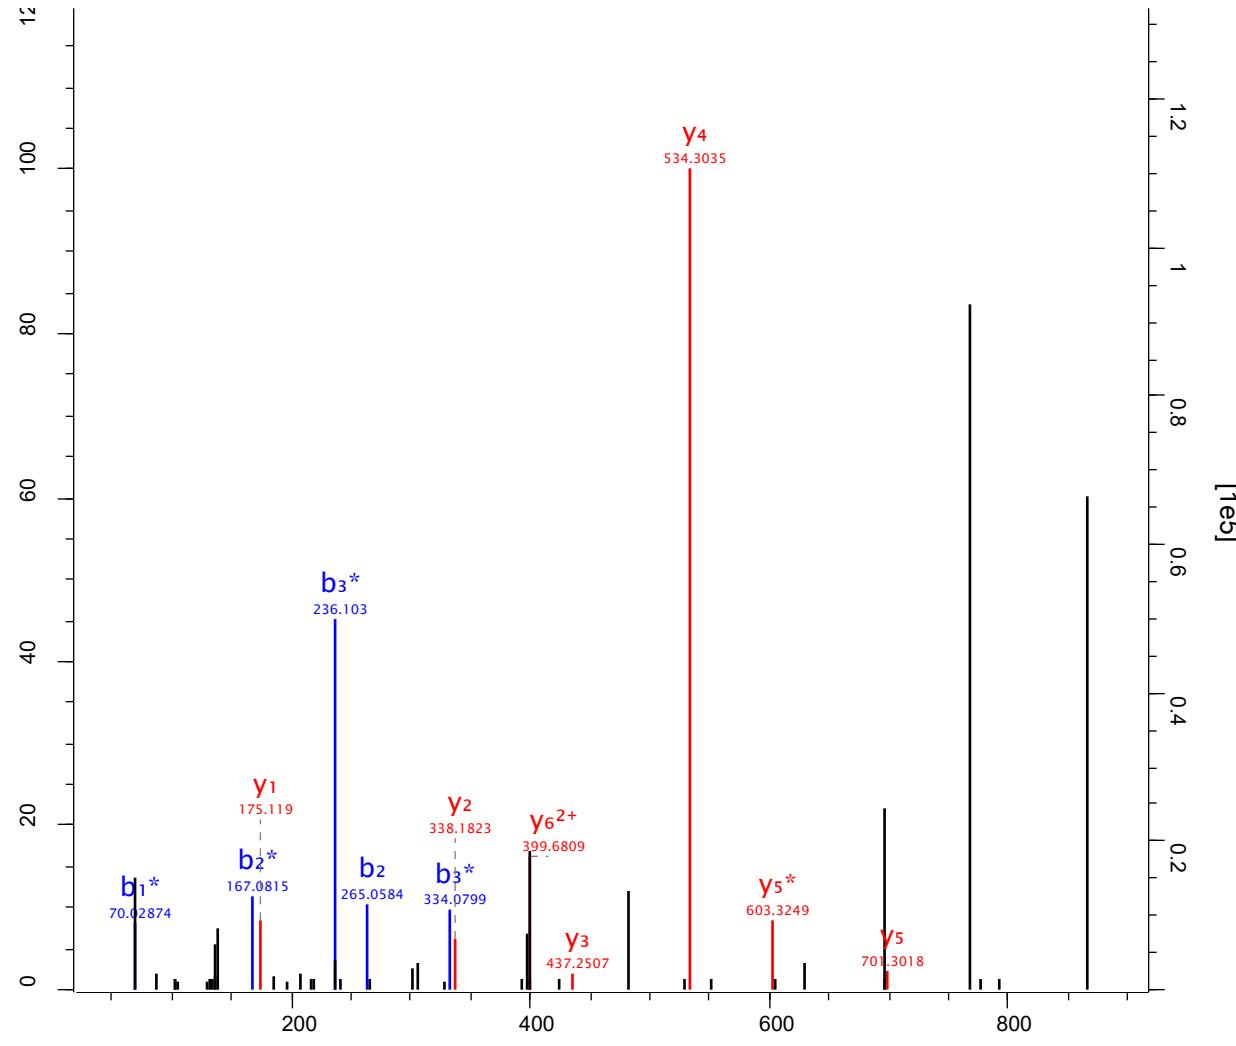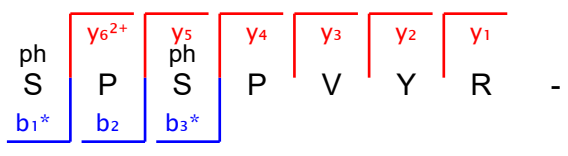

Raw file Scan Method Score m/z  
 sys\_00\_2 10457 FTMS; HCD 44.25 644.27

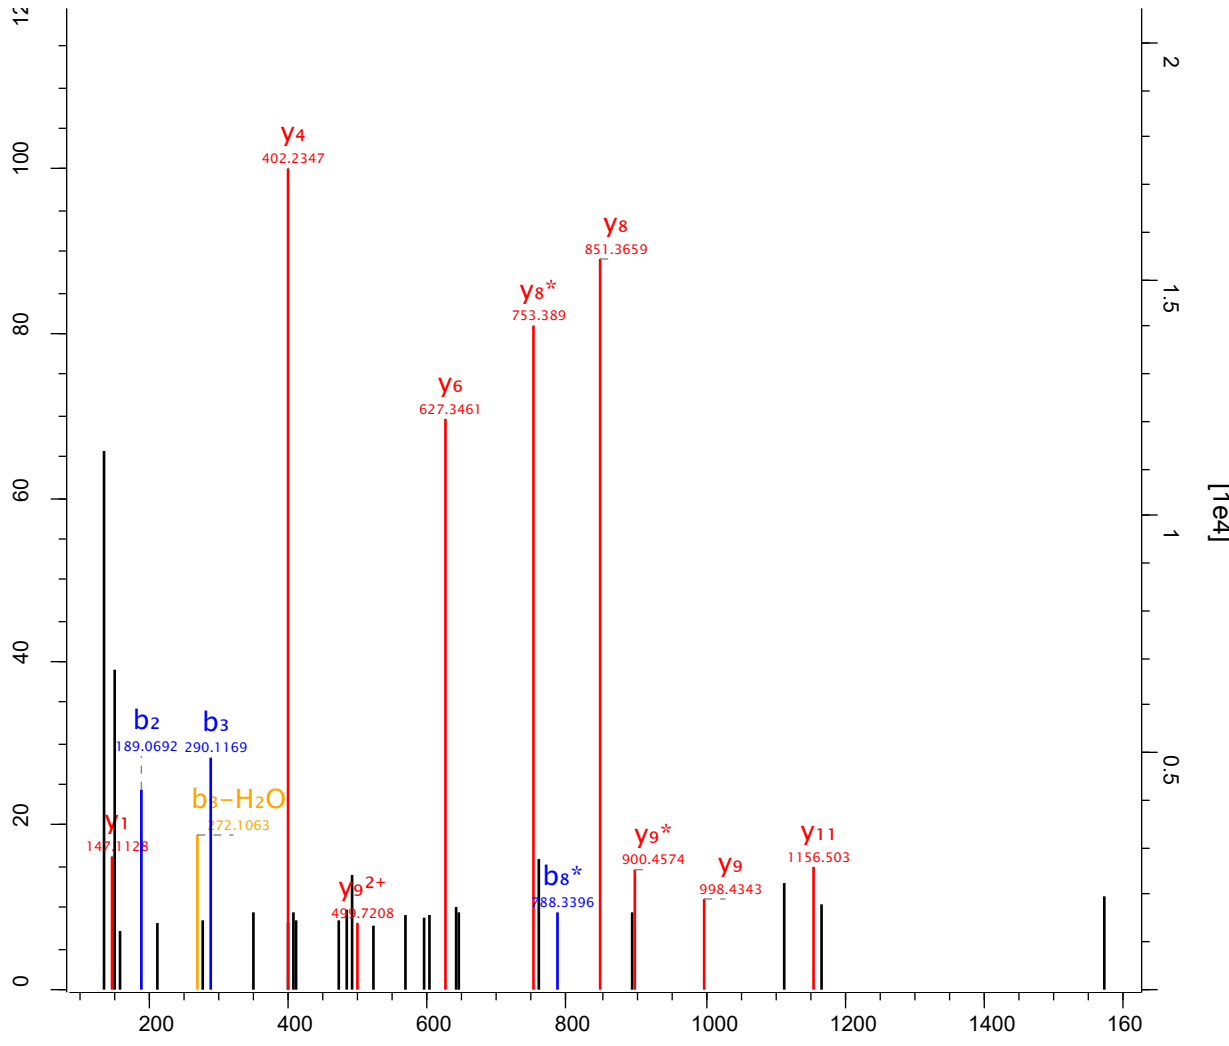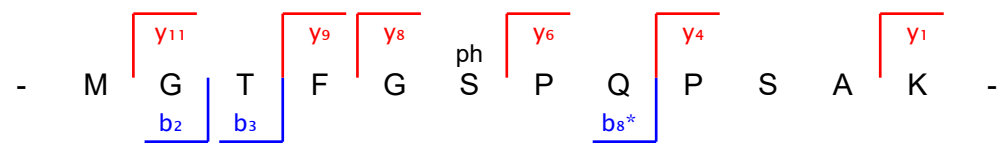

| Raw file | Scan  | Method    | Score | m/z    |
|----------|-------|-----------|-------|--------|
| sys_00_2 | 10468 | FTMS; HCD | 54.16 | 490.71 |

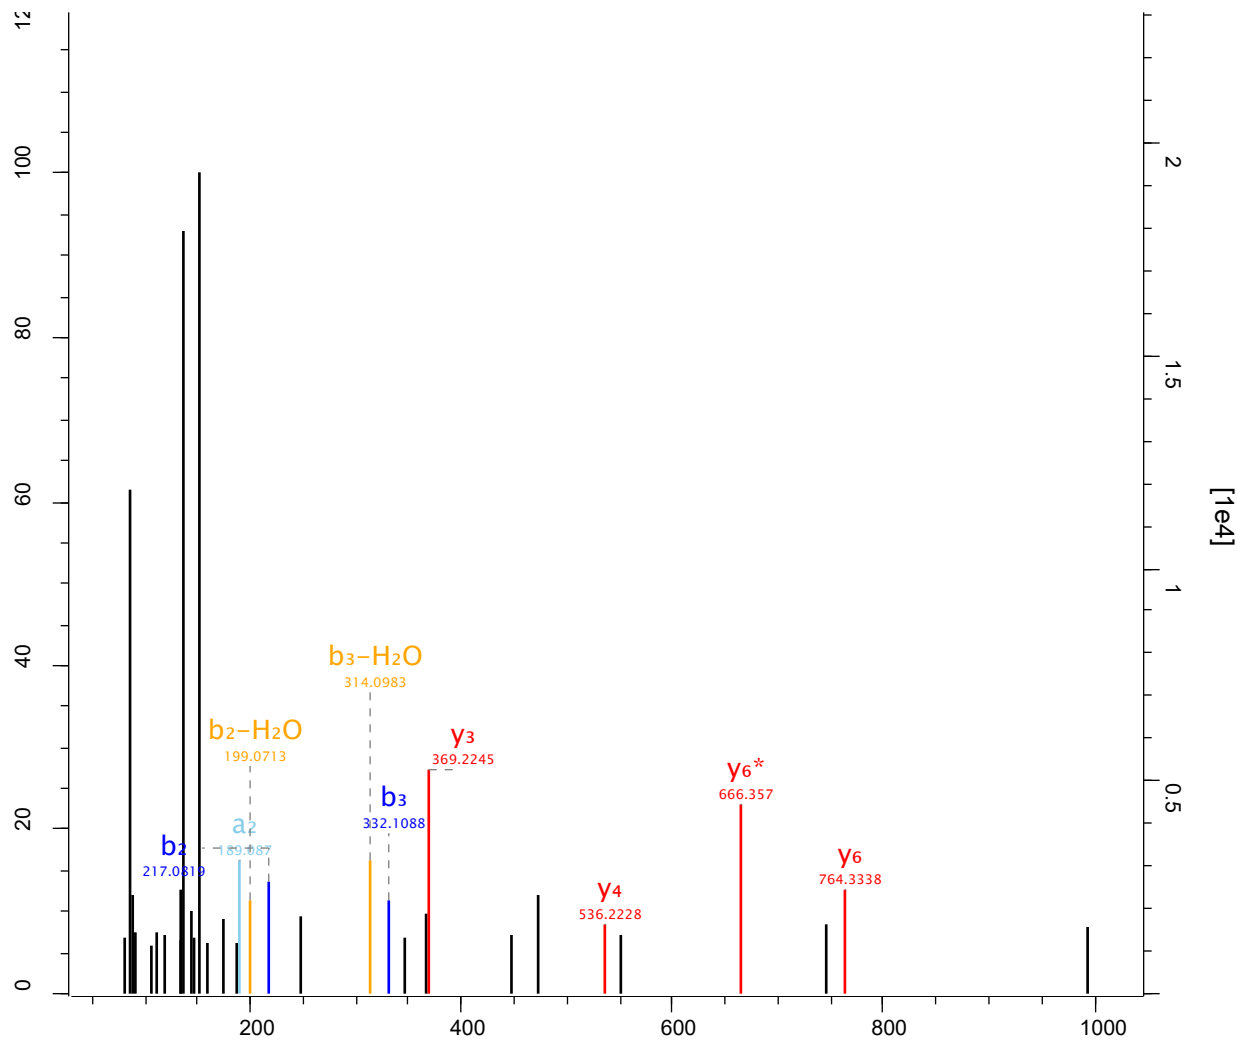

- D T D I S P P R -

[  $b_2$  ]
[  $y_6$  ]
[  $y_4$   $ph$  ]
[  $y_3$  ]
[  $b_3$  ]

Raw file Scan Method Score m/z  
 sys\_00\_2 10876 FTMS; HCD 147.62 456.73

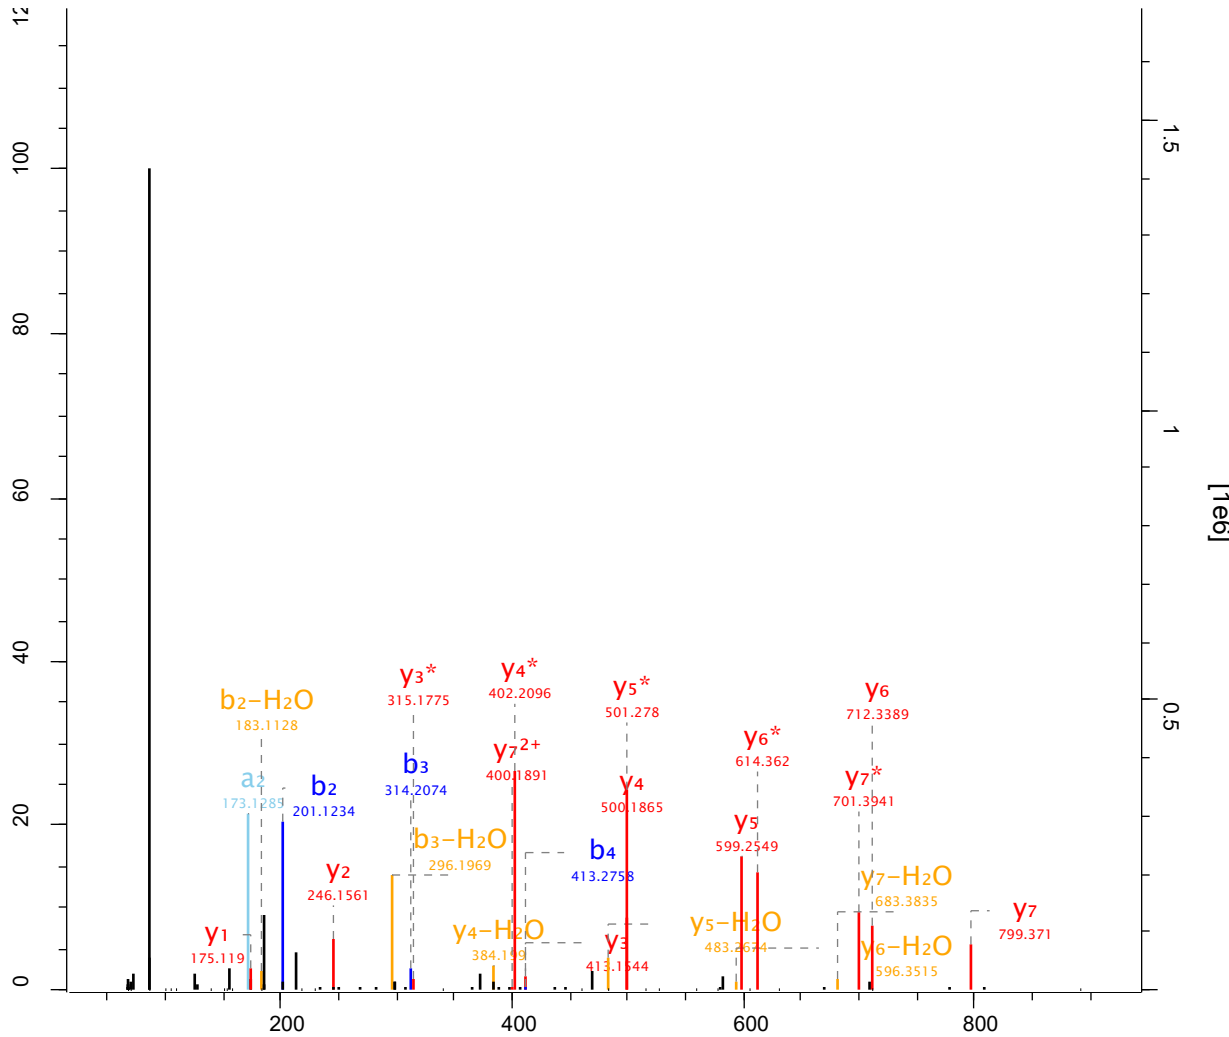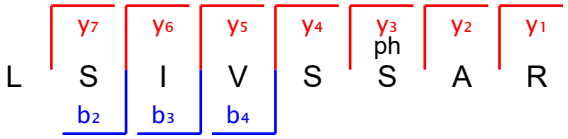

Raw file Scan Method Score m/z  
 sys\_00\_2 11570 FTMS; HCD 109.04 657.3

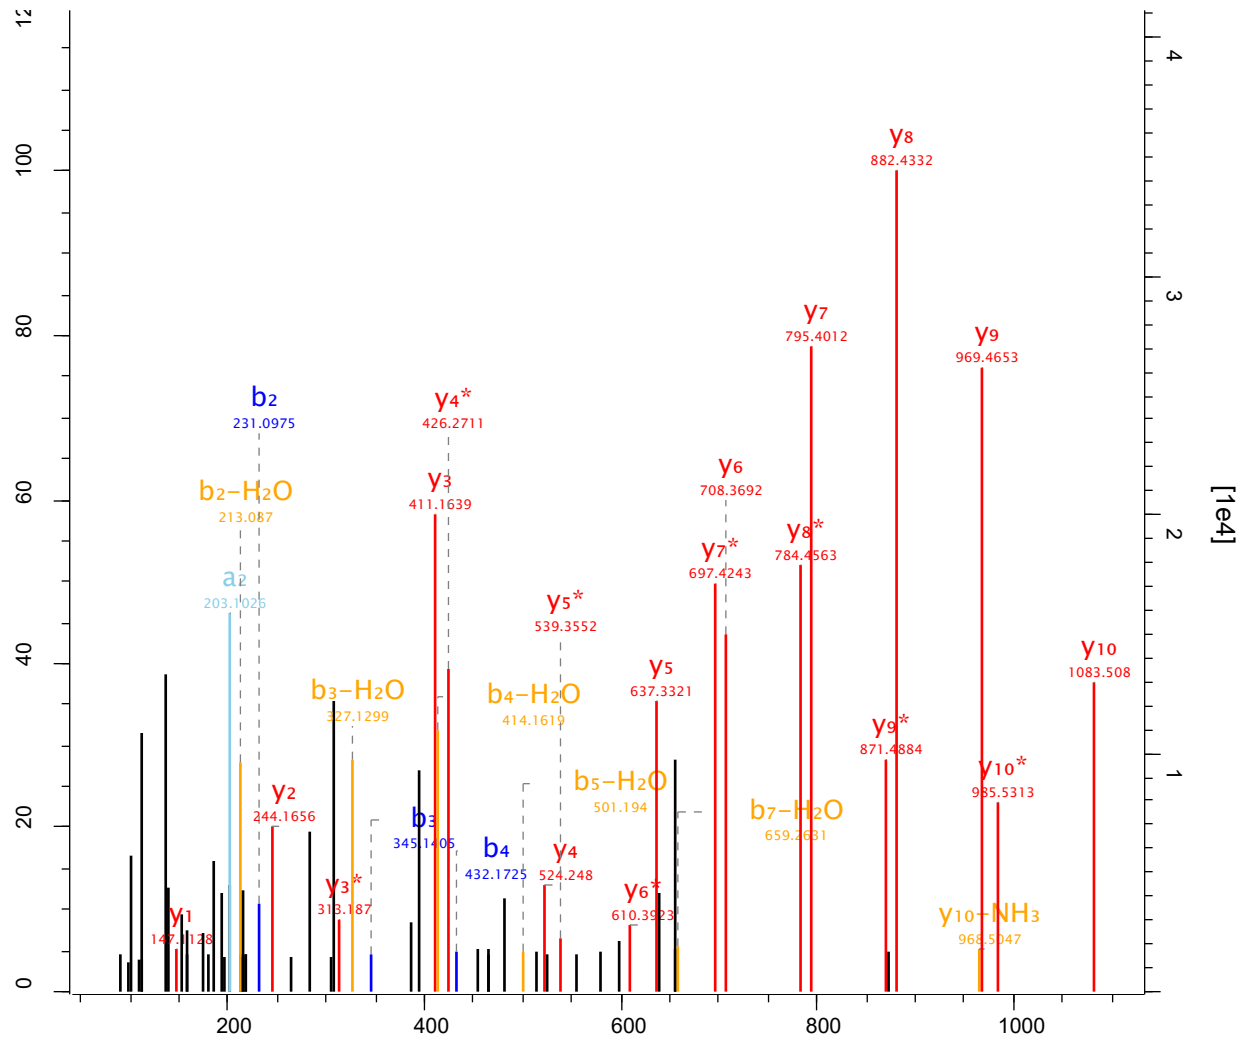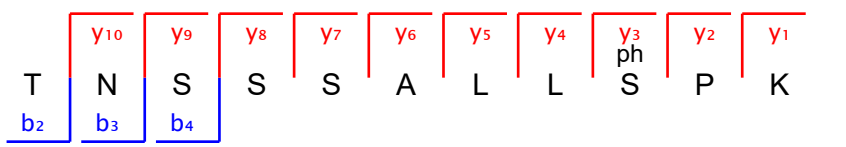



Raw file Scan Method Score m/z  
 sys\_00\_2 13502 FTMS; HCD 40.43 582.23

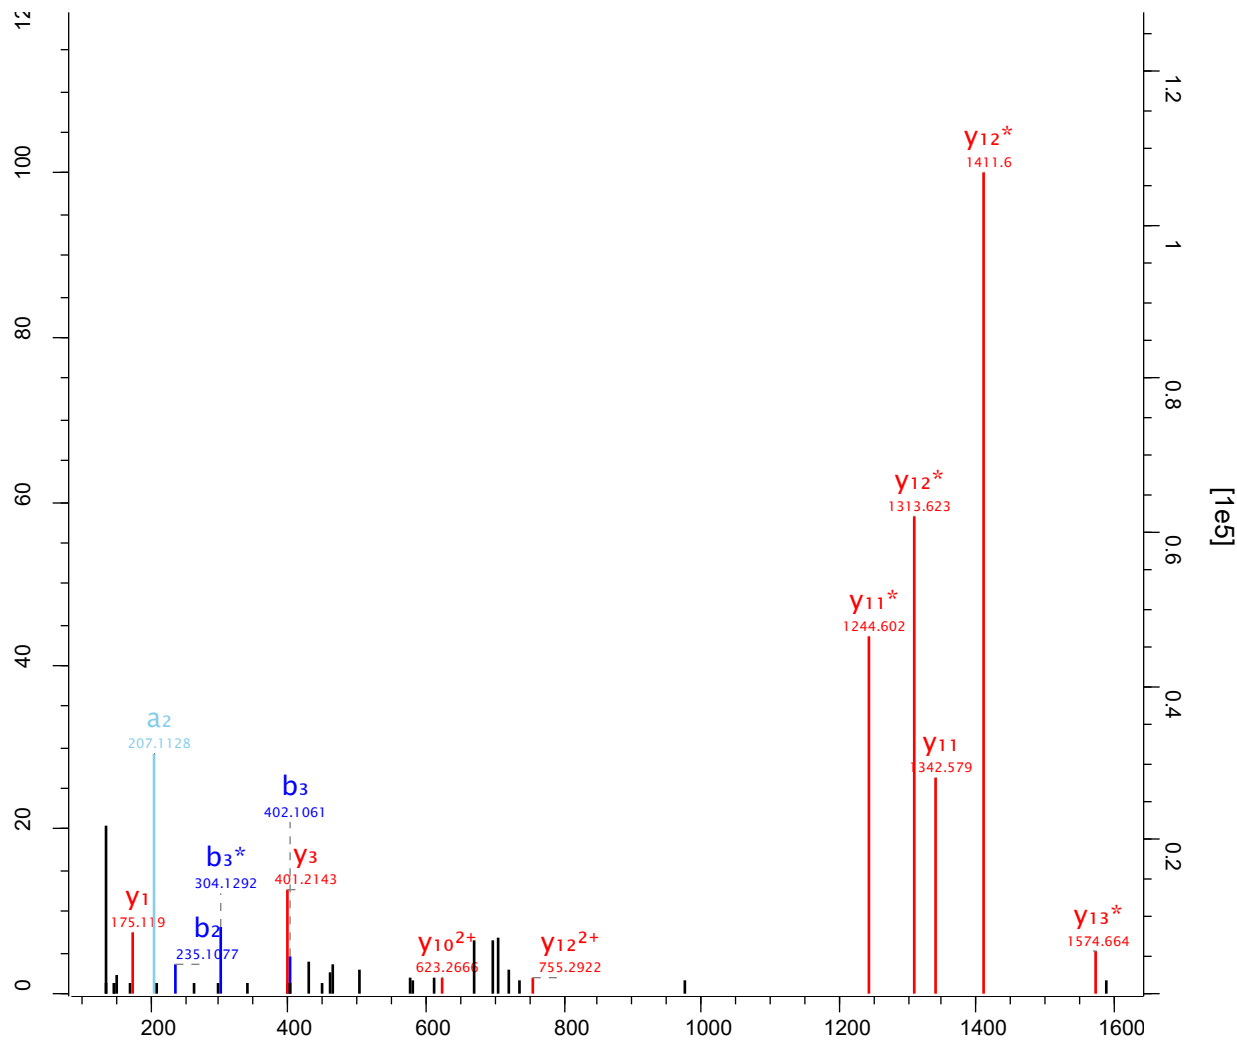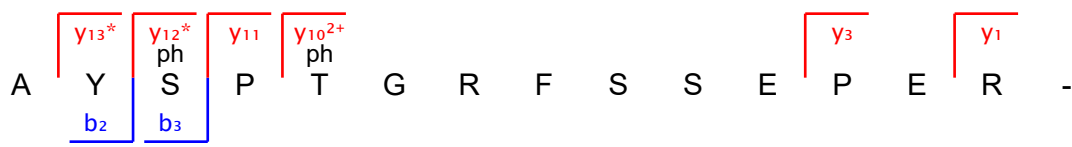

Raw file Scan Method Score m/z  
 sys\_00\_2 14148 FTMS; HCD 69.72 514.24

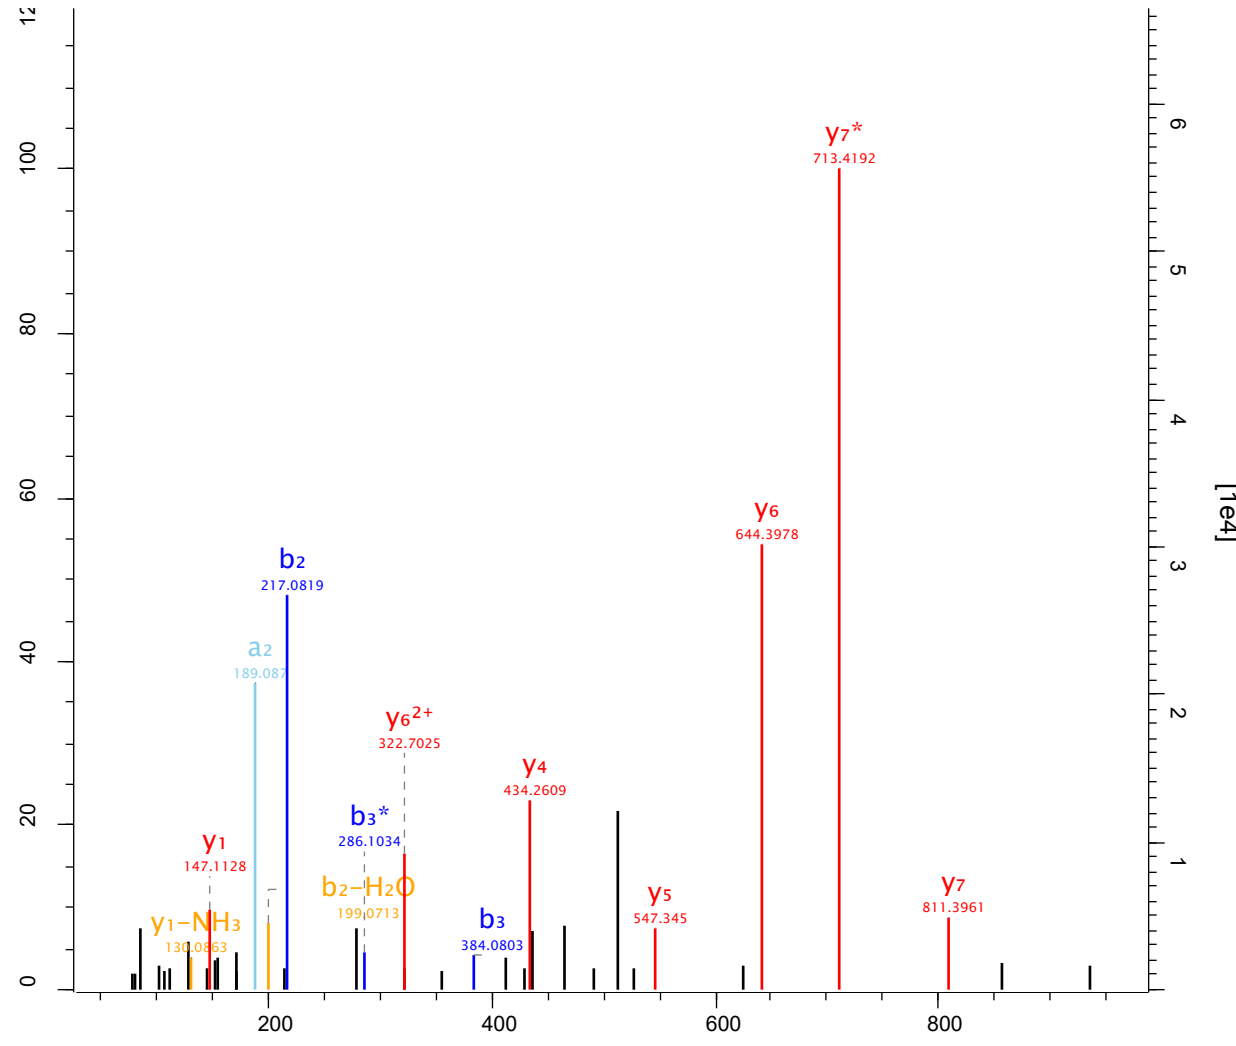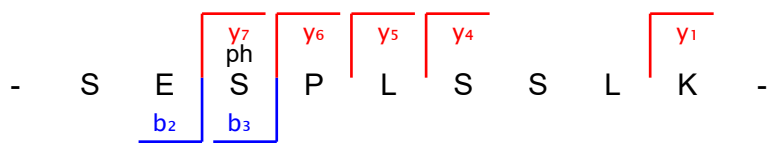

Raw file Scan Method Score m/z  
 sys\_00\_2 14643 FTMS; HCD 54.28 759.83

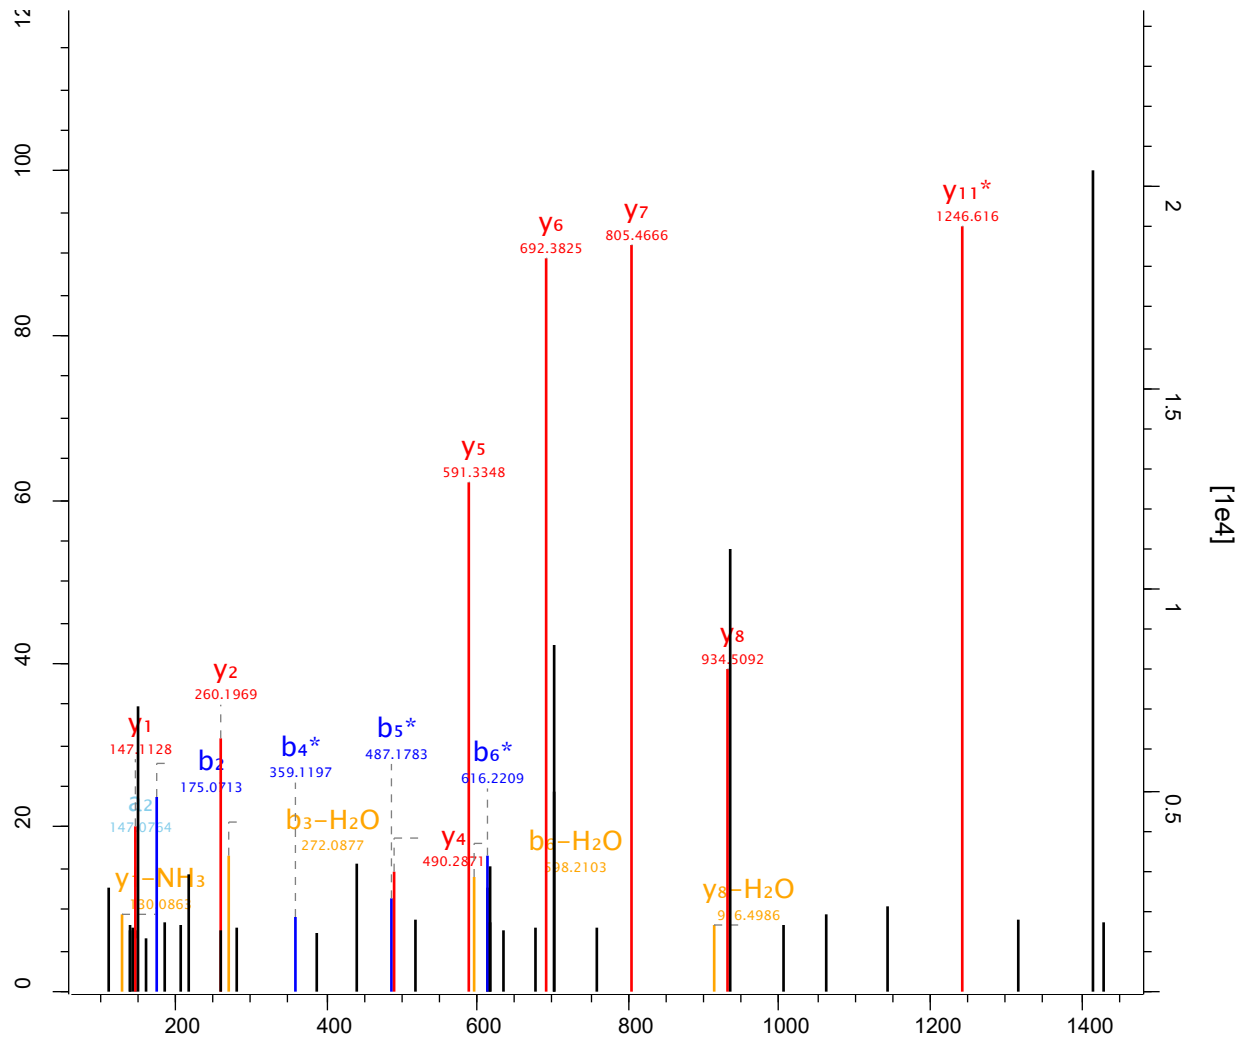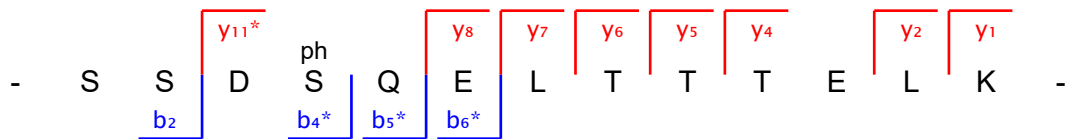

Raw file Scan Method Score m/z  
 sys\_00\_2 14960 FTMS; HCD 305.22 756.29

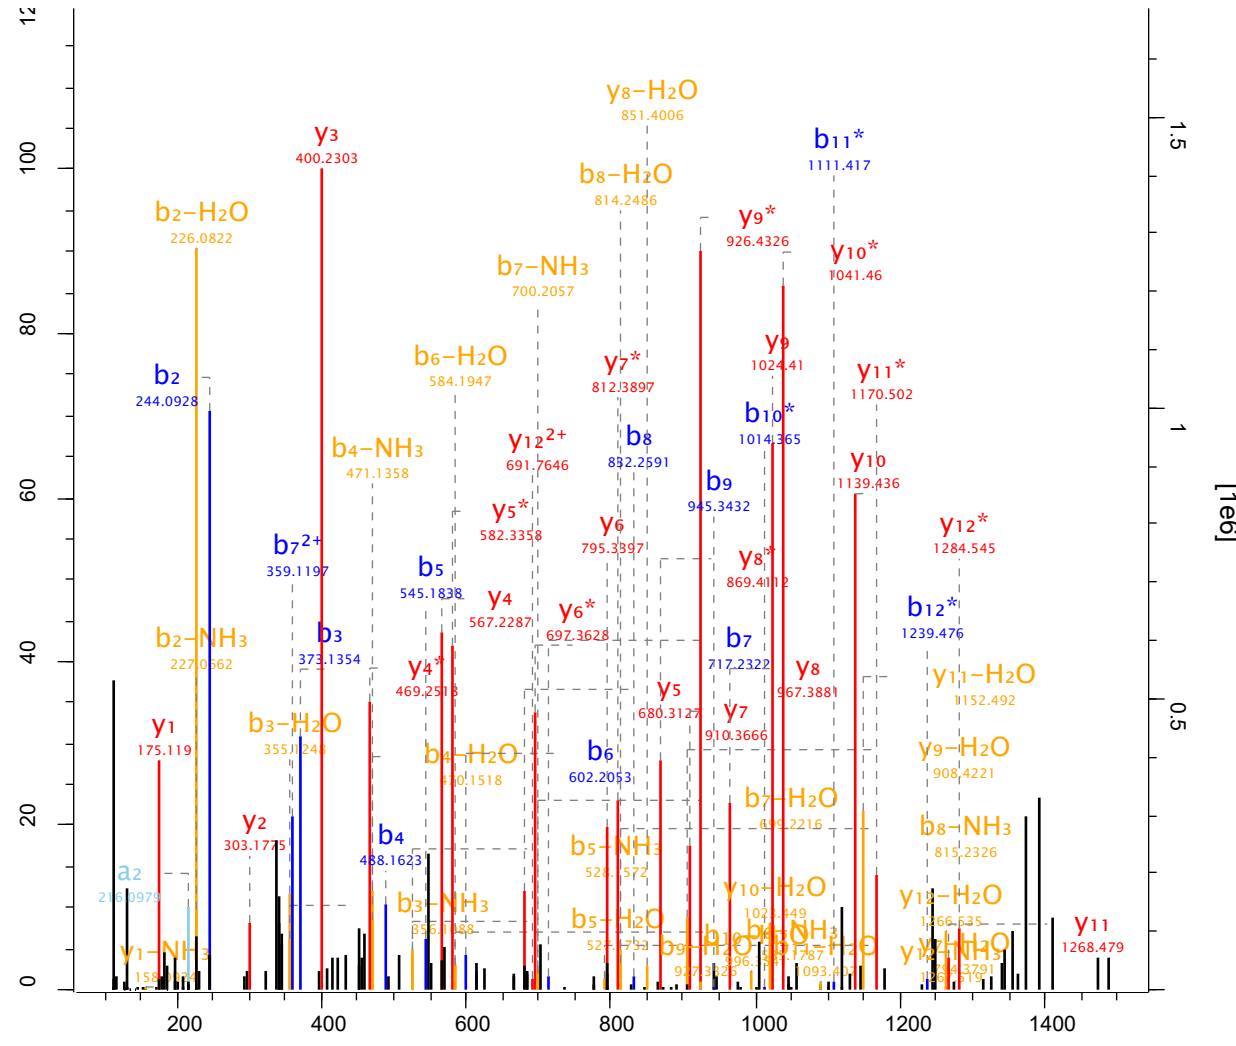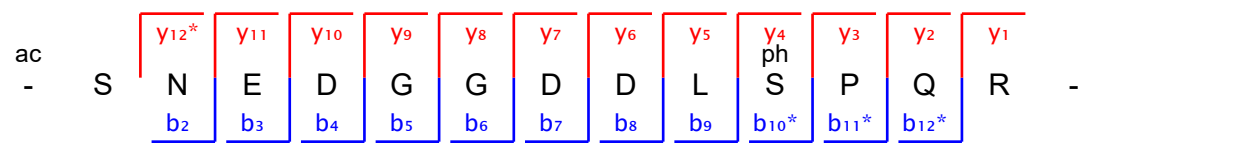

Raw file Scan Method Score m/z  
 sys\_00\_2 1497 FTMS; HCD 43.77 685.93

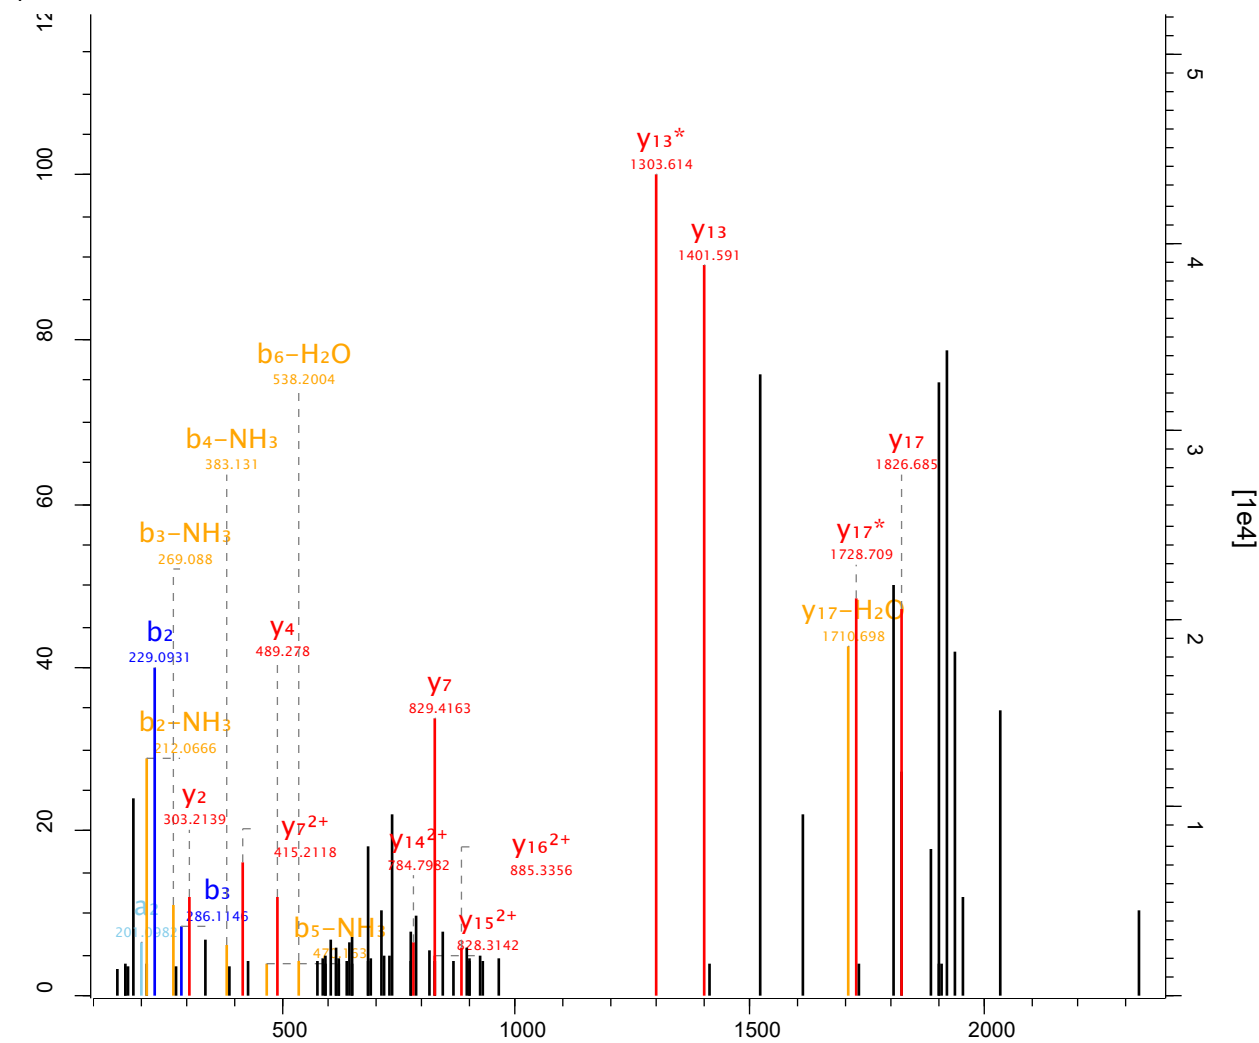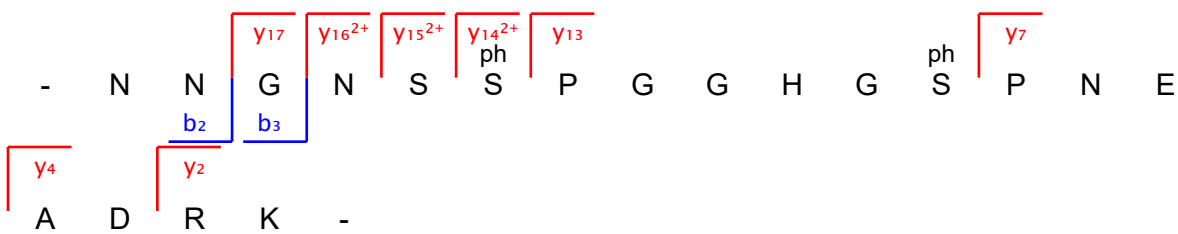

Raw file Scan Method Score m/z  
 sys\_00\_2 15999 FTMS; HCD 85.55 603.75

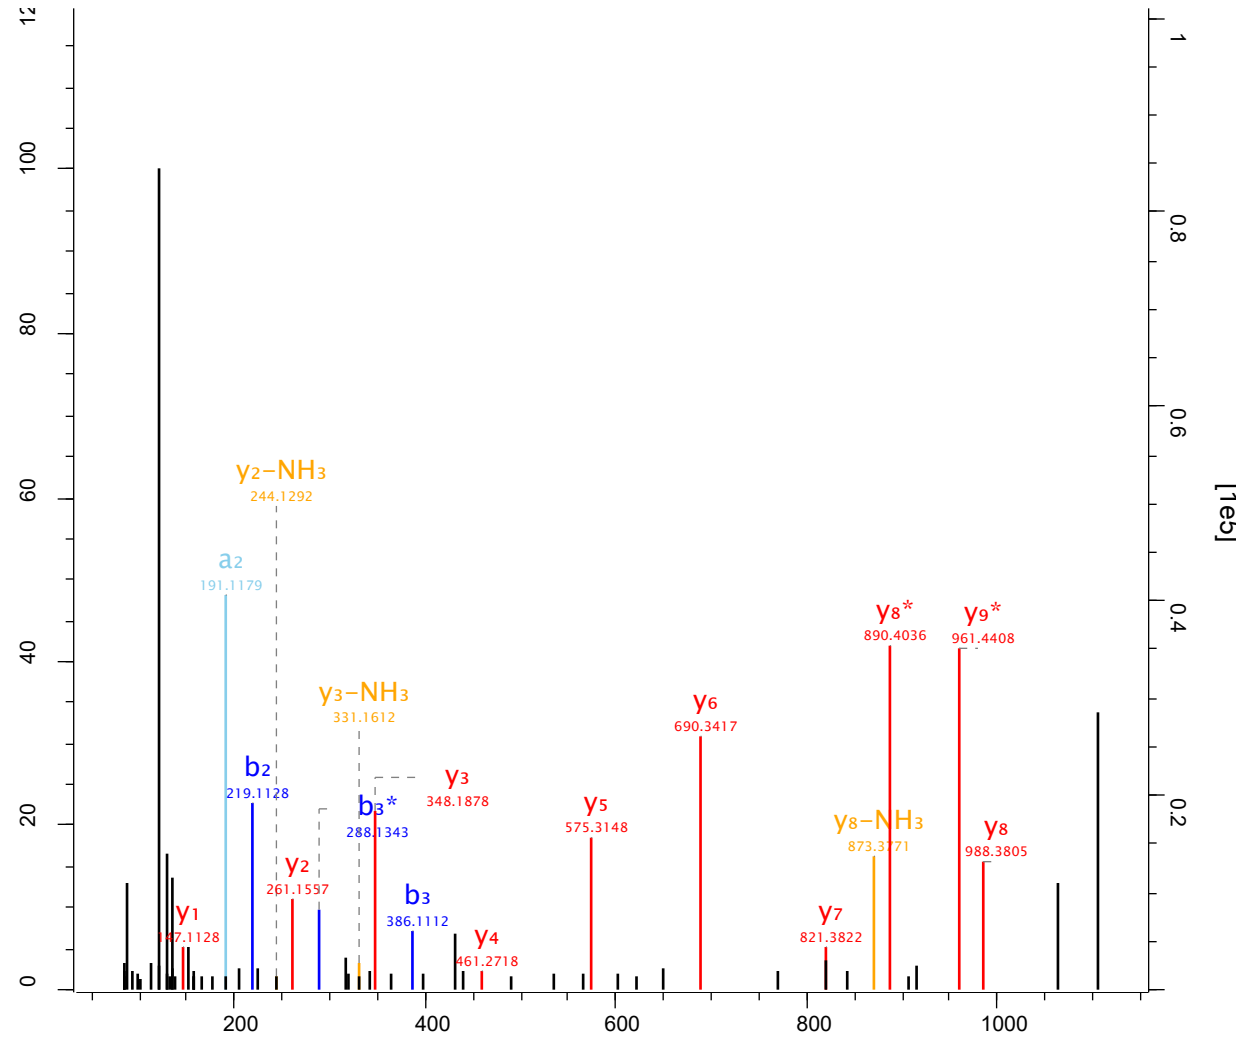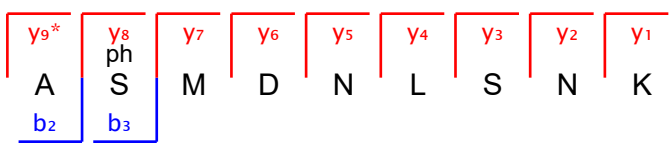

Raw file Scan Method Score m/z  
 sys\_00\_2 16007 FTMS; HCD 117.86 553.24

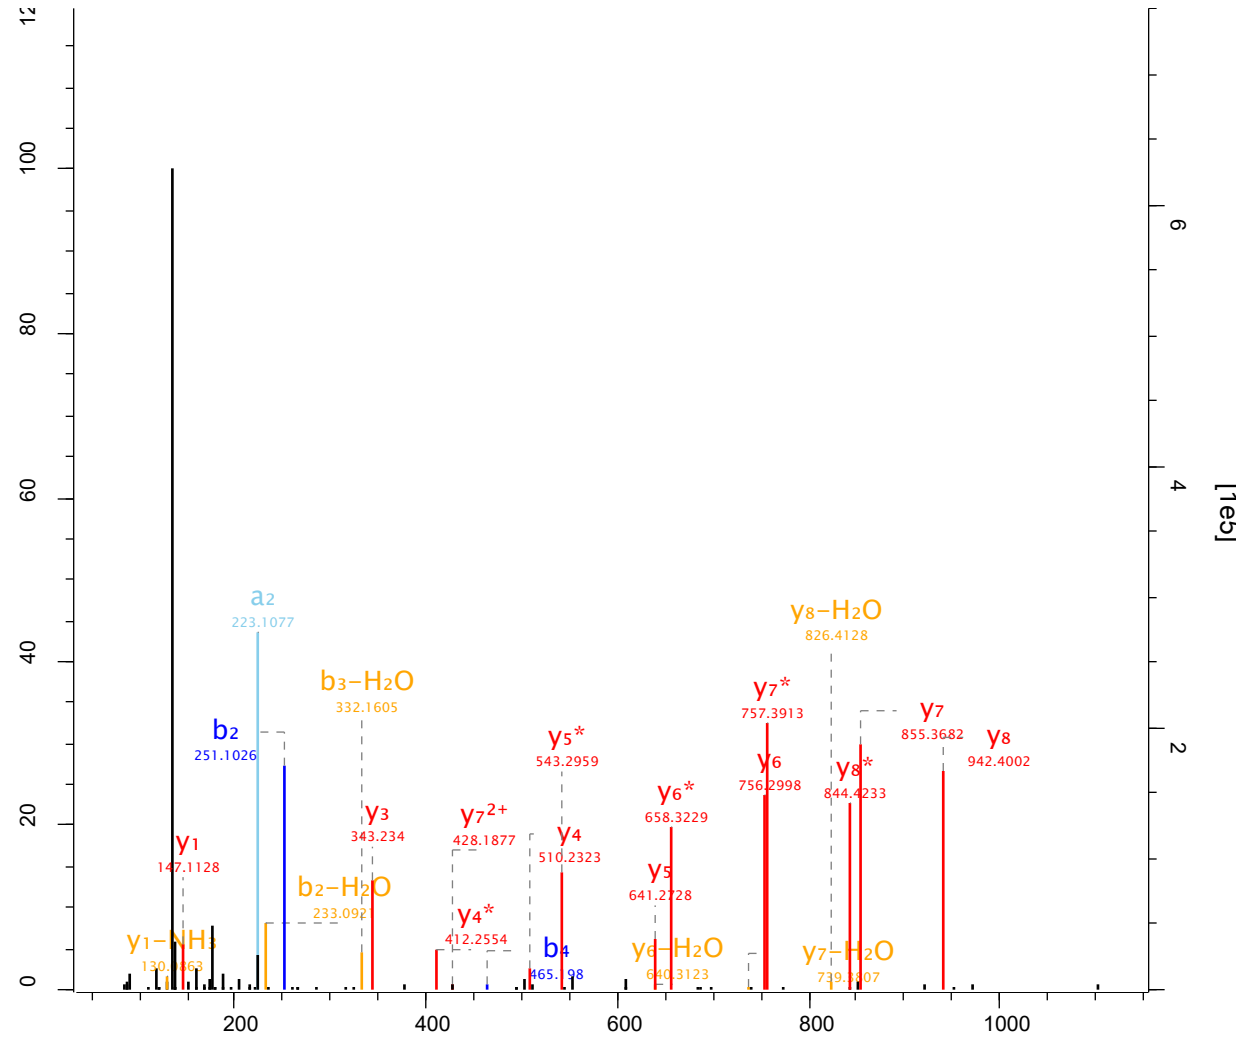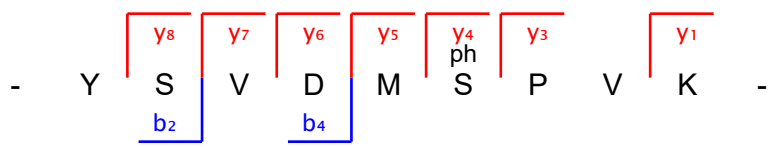

Raw file Scan Method Score m/z  
 sys\_00\_2 17622 FTMS; HCD 177.42 649.25

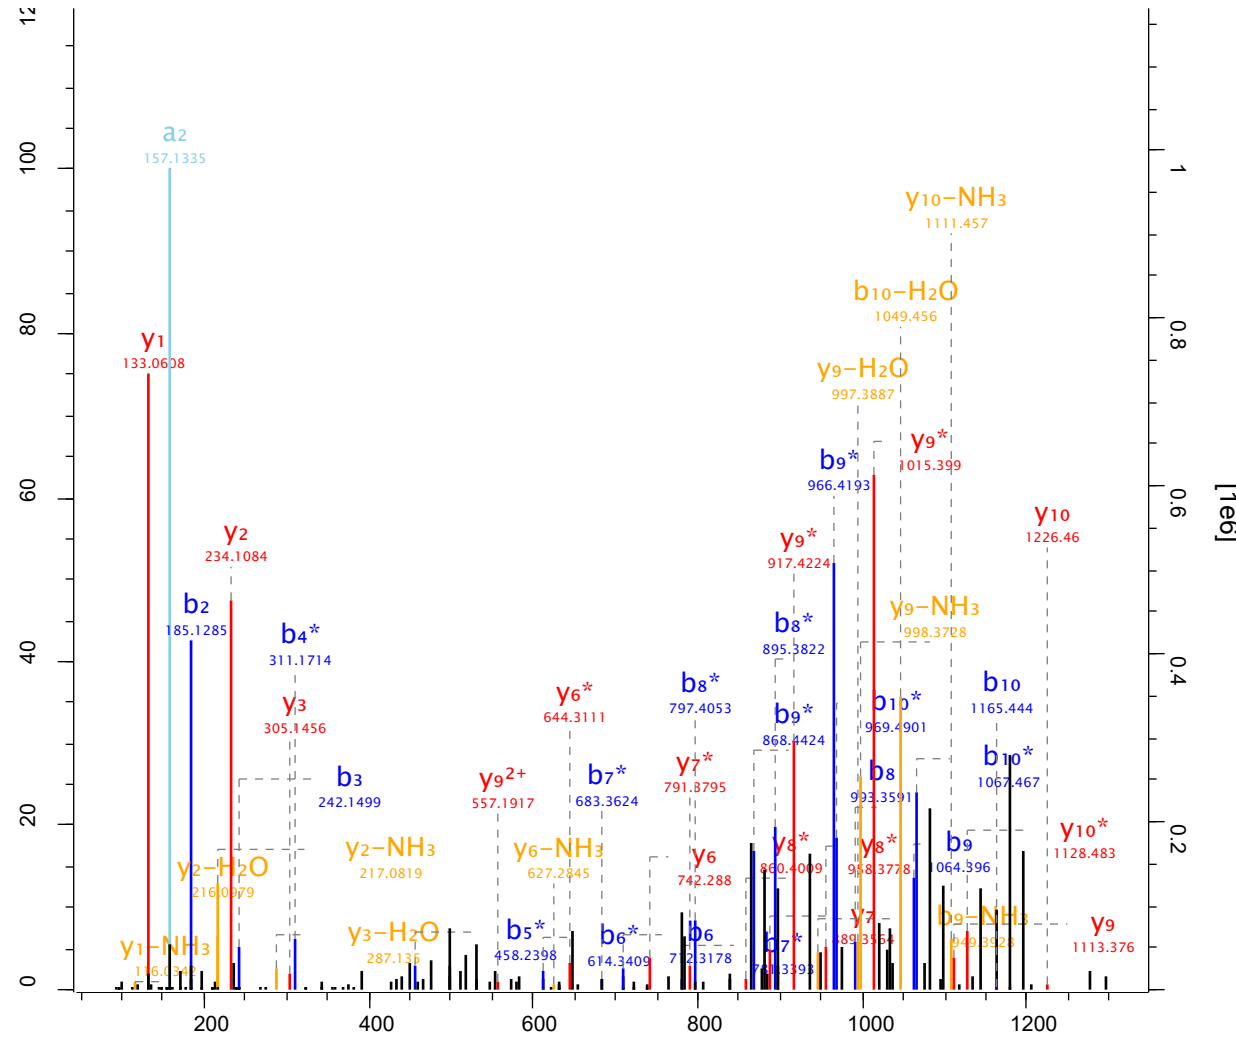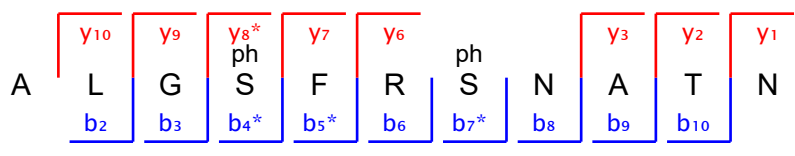



Raw file Scan Method Score m/z  
 sys\_00\_2 19780 FTMS; HCD 46.89 751.84

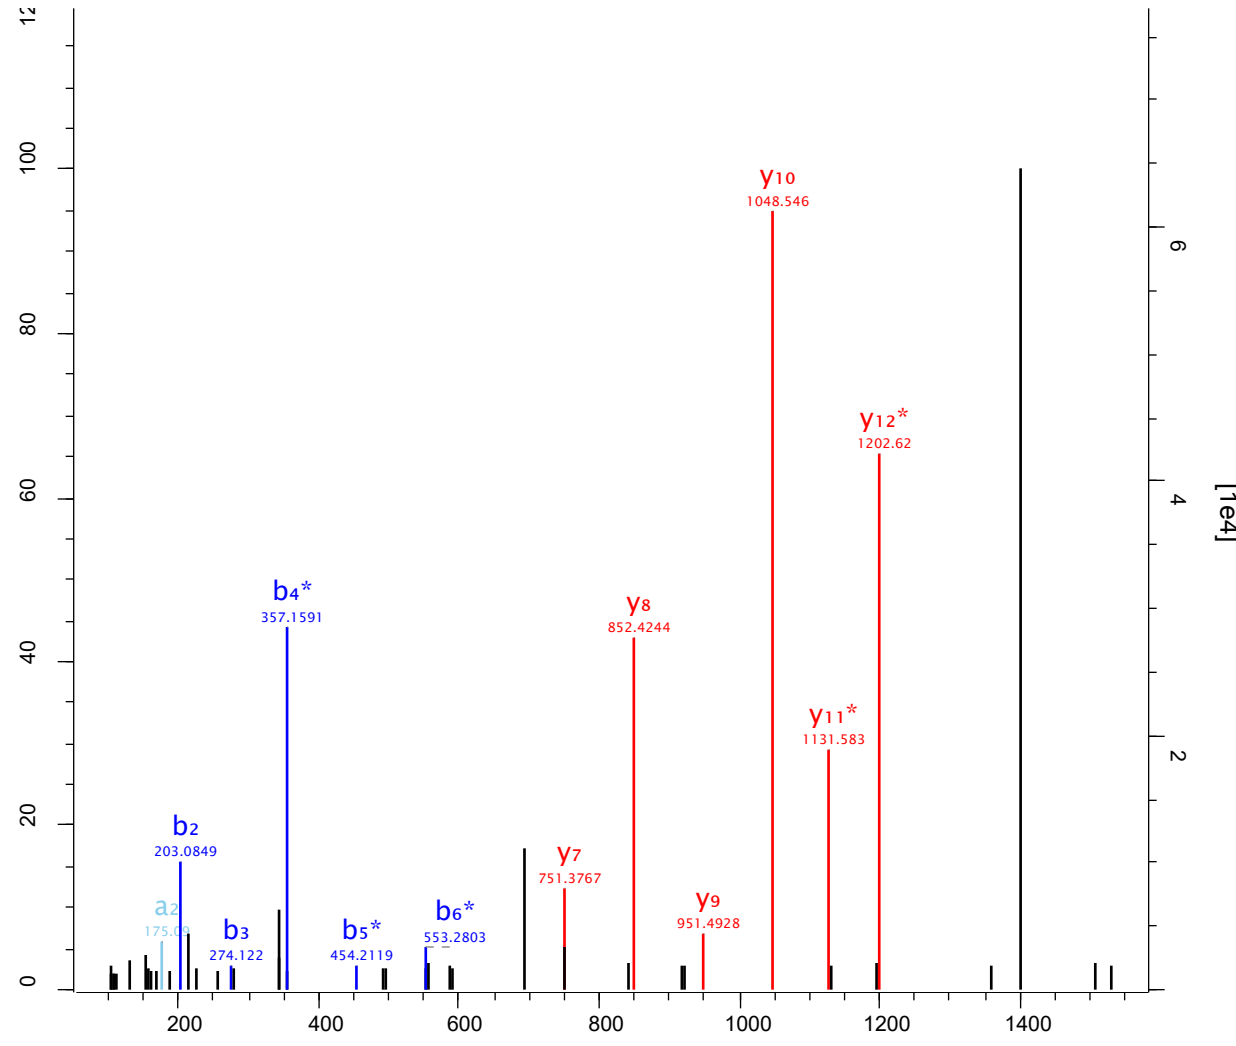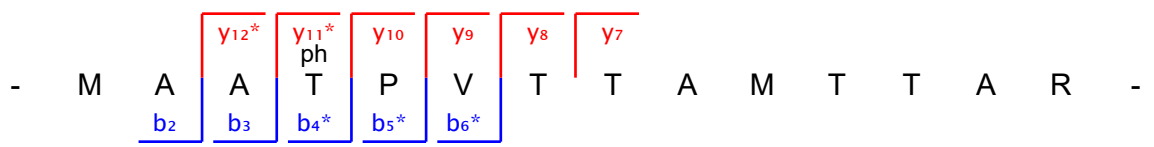

Raw file Scan Method Score m/z  
 sys\_00\_2 20133 FTMS; HCD 210.64 969.92

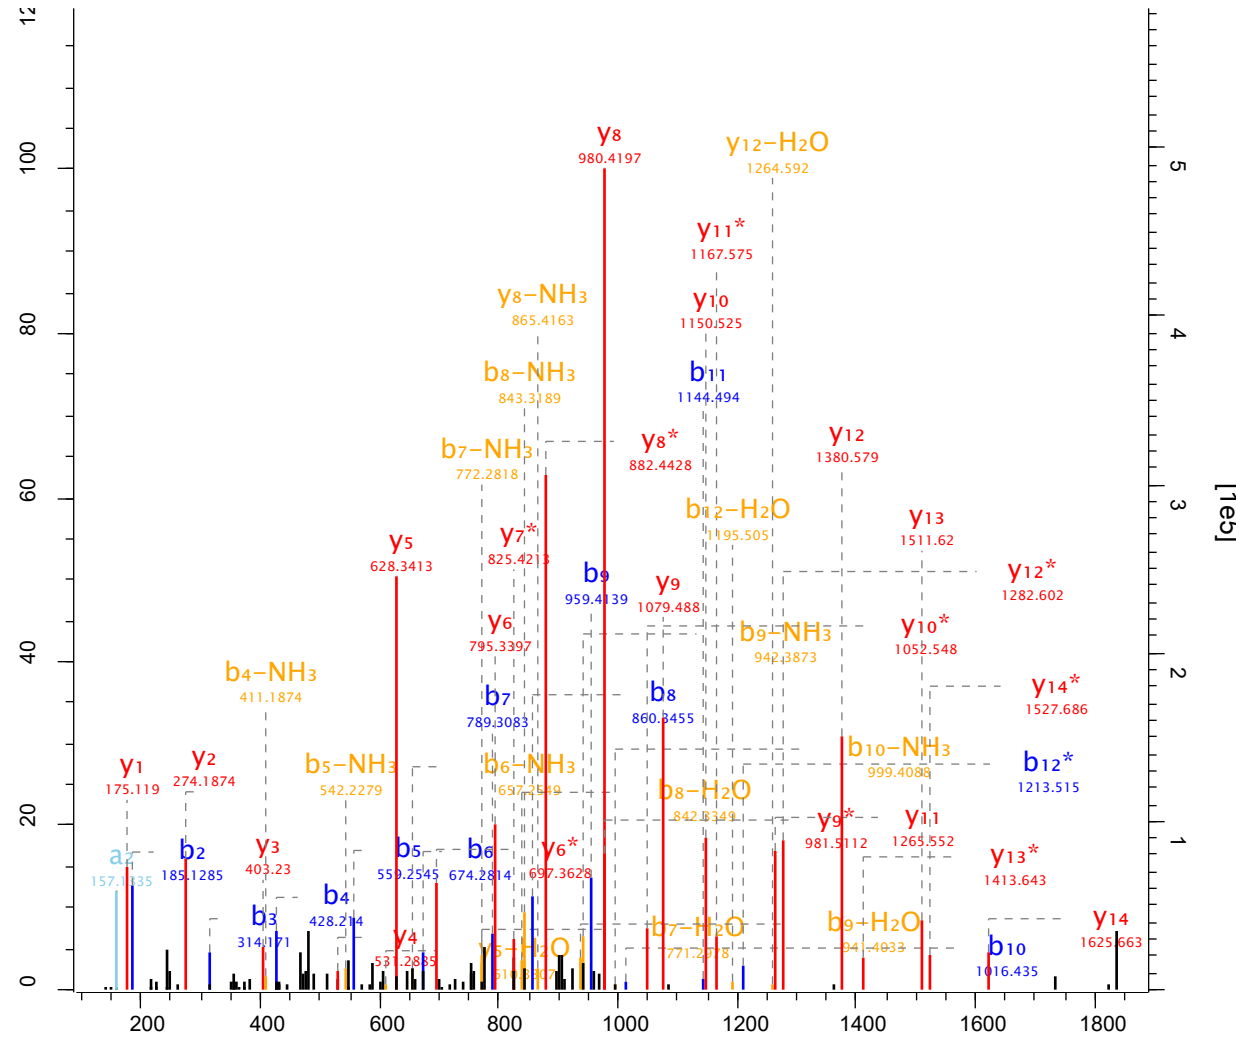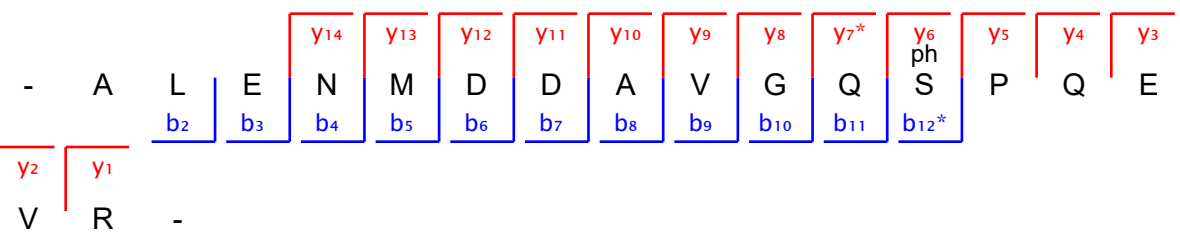



Raw file Scan Method Score m/z  
 sys\_00\_2 22688 FTMS; HCD 241.79 718.86

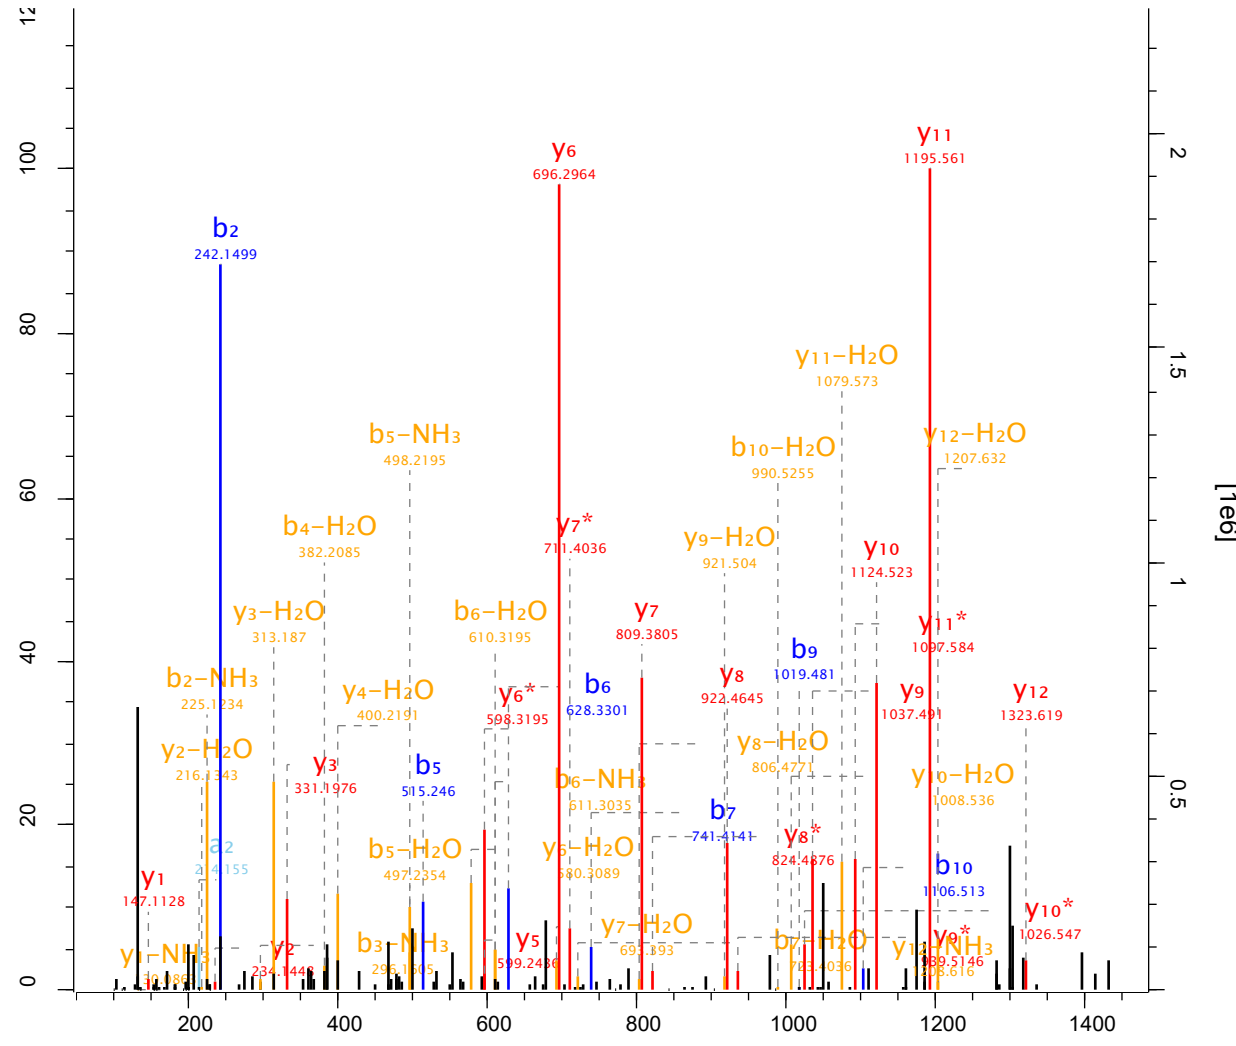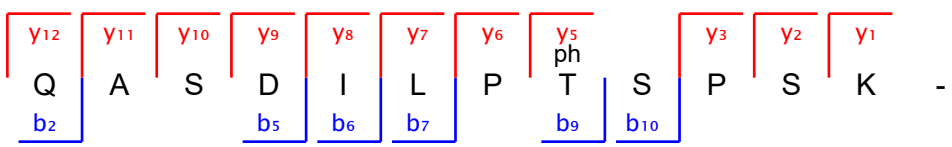

Raw file Scan Method Score m/z  
 sys\_00\_2 23125 FTMS; HCD 134.68 643.29

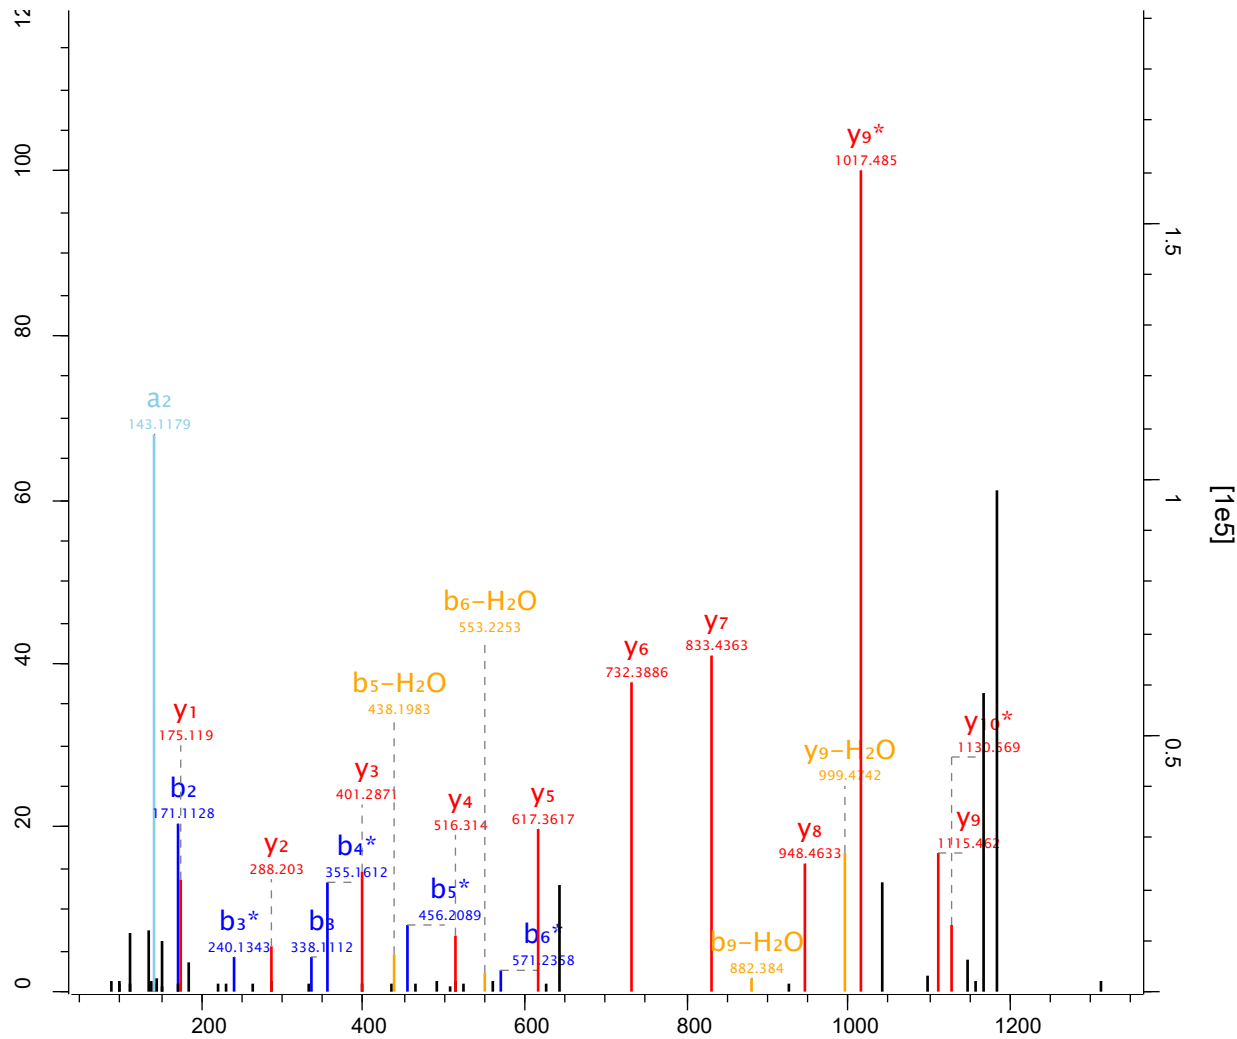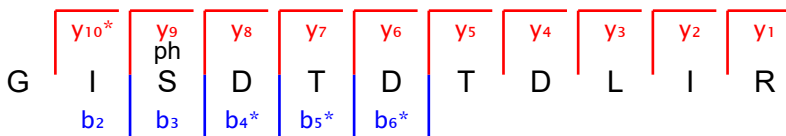

Raw file Scan Method Score m/z  
 sys\_00\_2 25449 FTMS; HCD 167.63 886.36

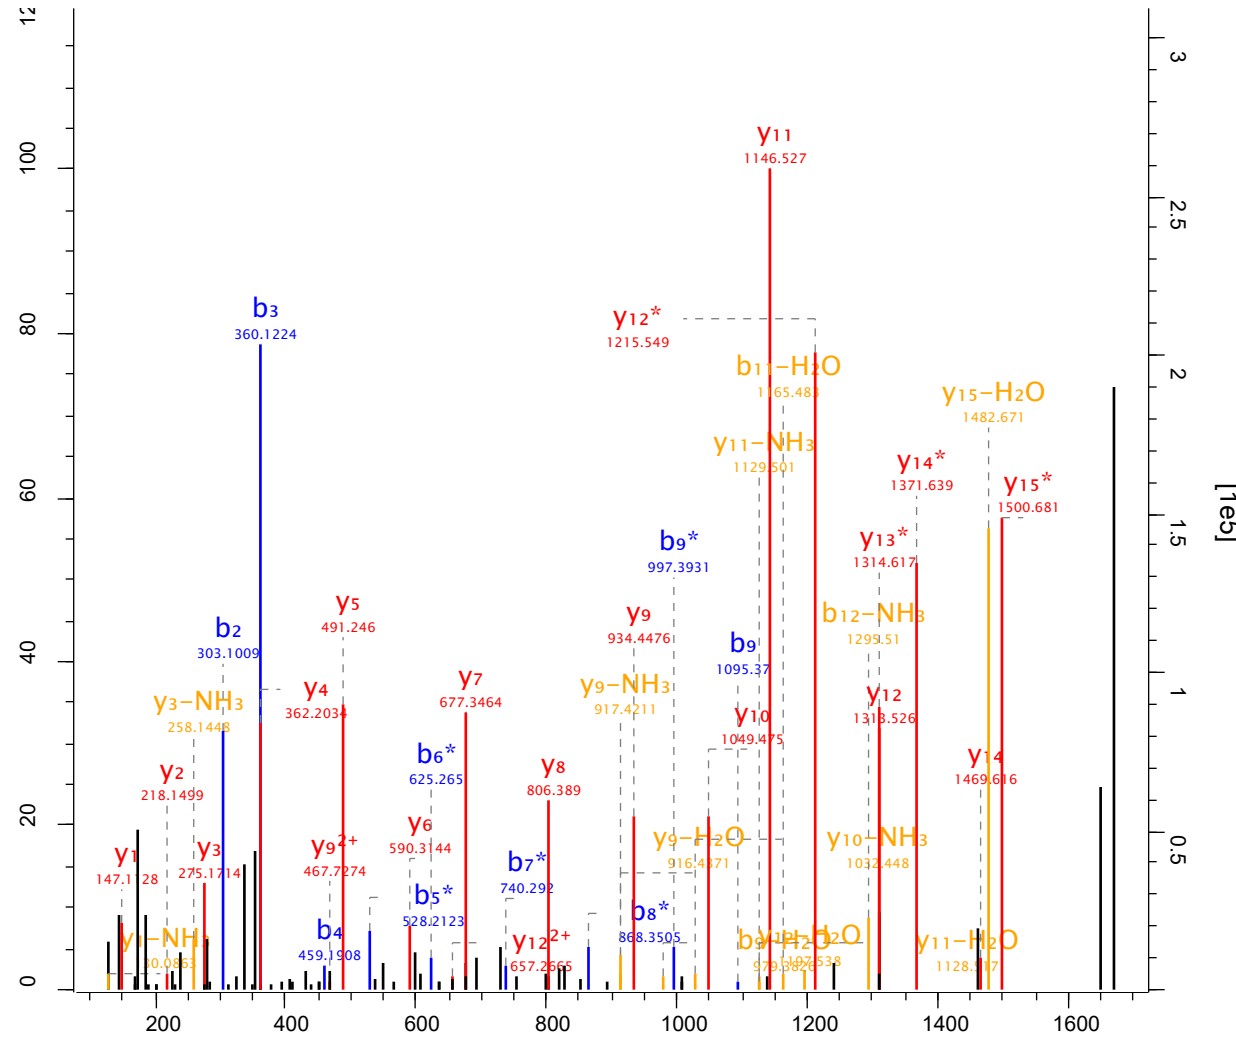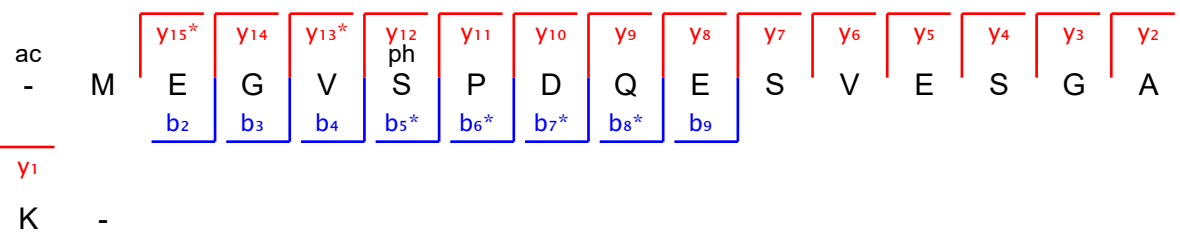

Raw file Scan Method Score m/z  
 sys\_00\_2 28719 FTMS; HCD 135.21 930.38

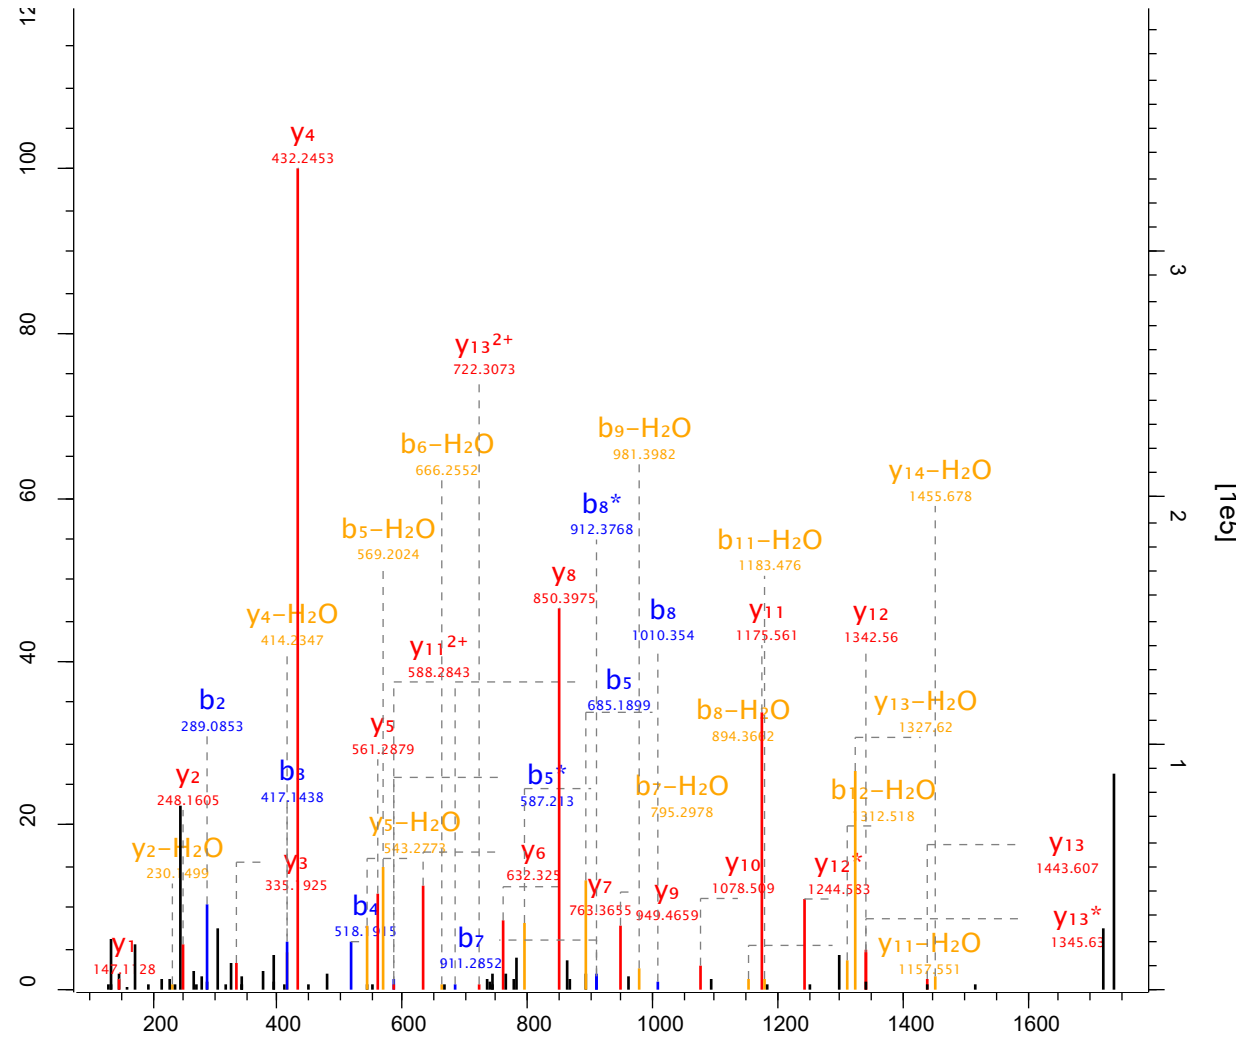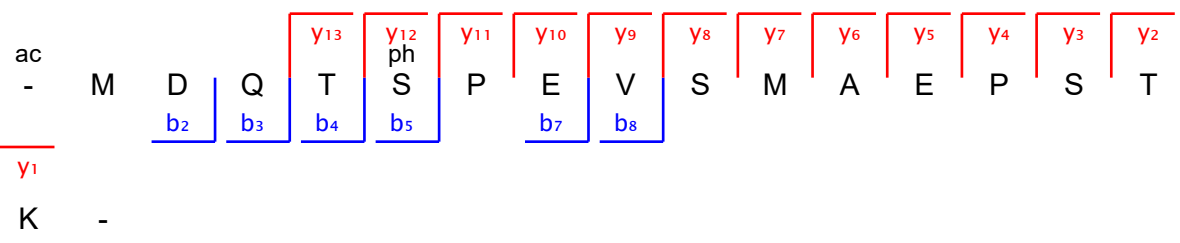

Raw file Scan Method Score m/z  
 sys\_00\_2 30261 FTMS; HCD 131.79 800.34

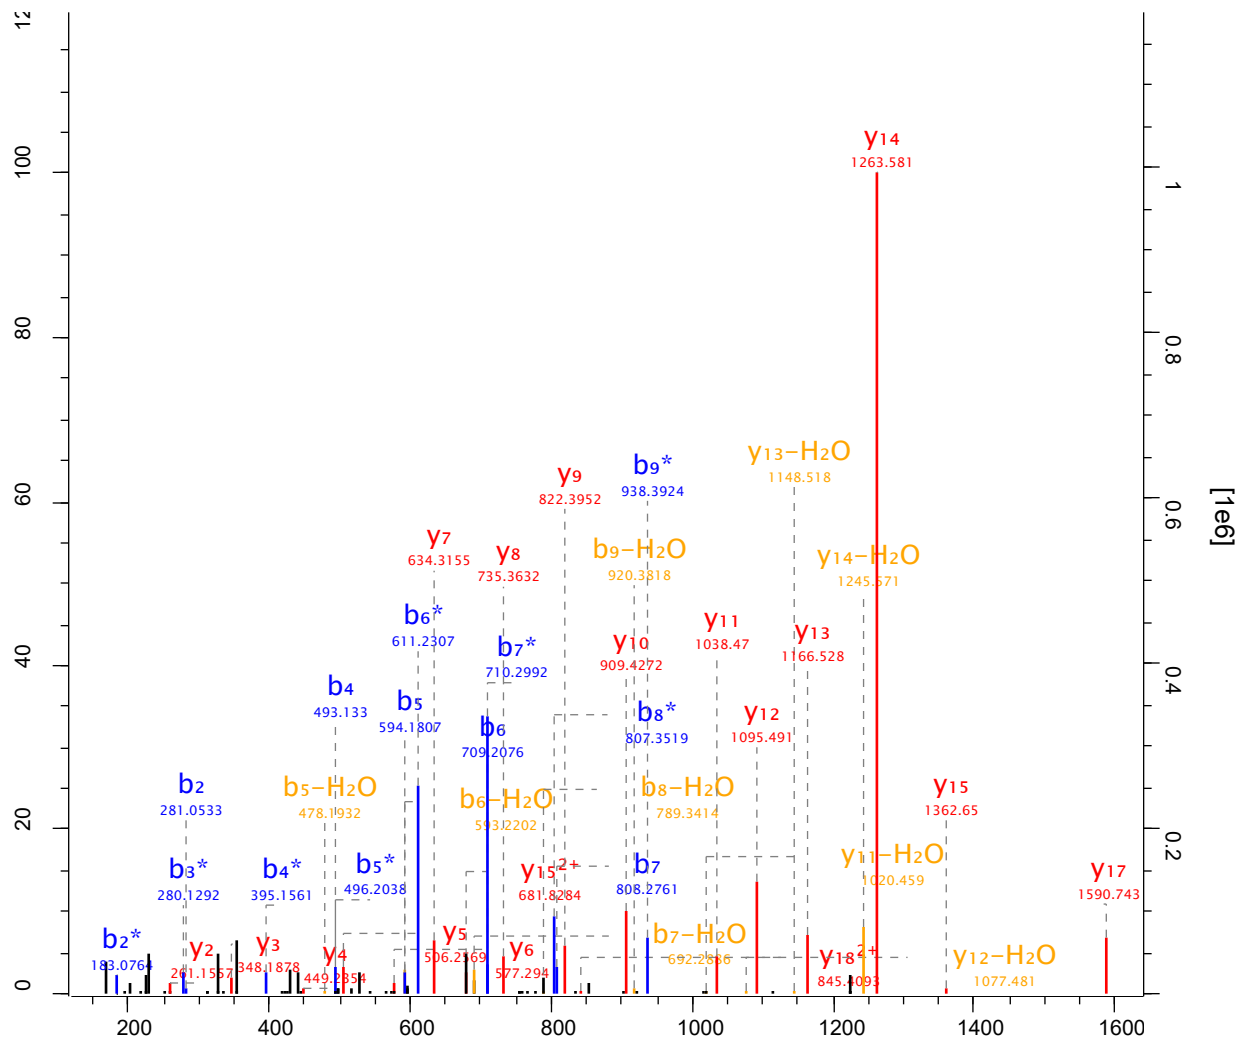

ac  
 - A S P D T D V P M V P A G E S  
 b<sub>2</sub> b<sub>3</sub>\* b<sub>4</sub> b<sub>5</sub> b<sub>6</sub> b<sub>7</sub> b<sub>8</sub>\* b<sub>9</sub>\* y<sub>18</sub><sup>2+</sup> y<sub>17</sub> y<sub>15</sub> y<sub>14</sub> y<sub>13</sub> y<sub>12</sub> y<sub>11</sub> y<sub>10</sub>  
 y<sub>9</sub> y<sub>8</sub> y<sub>7</sub> y<sub>6</sub> y<sub>5</sub> y<sub>4</sub> y<sub>3</sub> y<sub>2</sub> S T G A G T S N K -



Raw file Scan Method Score m/z  
 sys\_00\_2 3484 FTMS; HCD 121.25 980.36

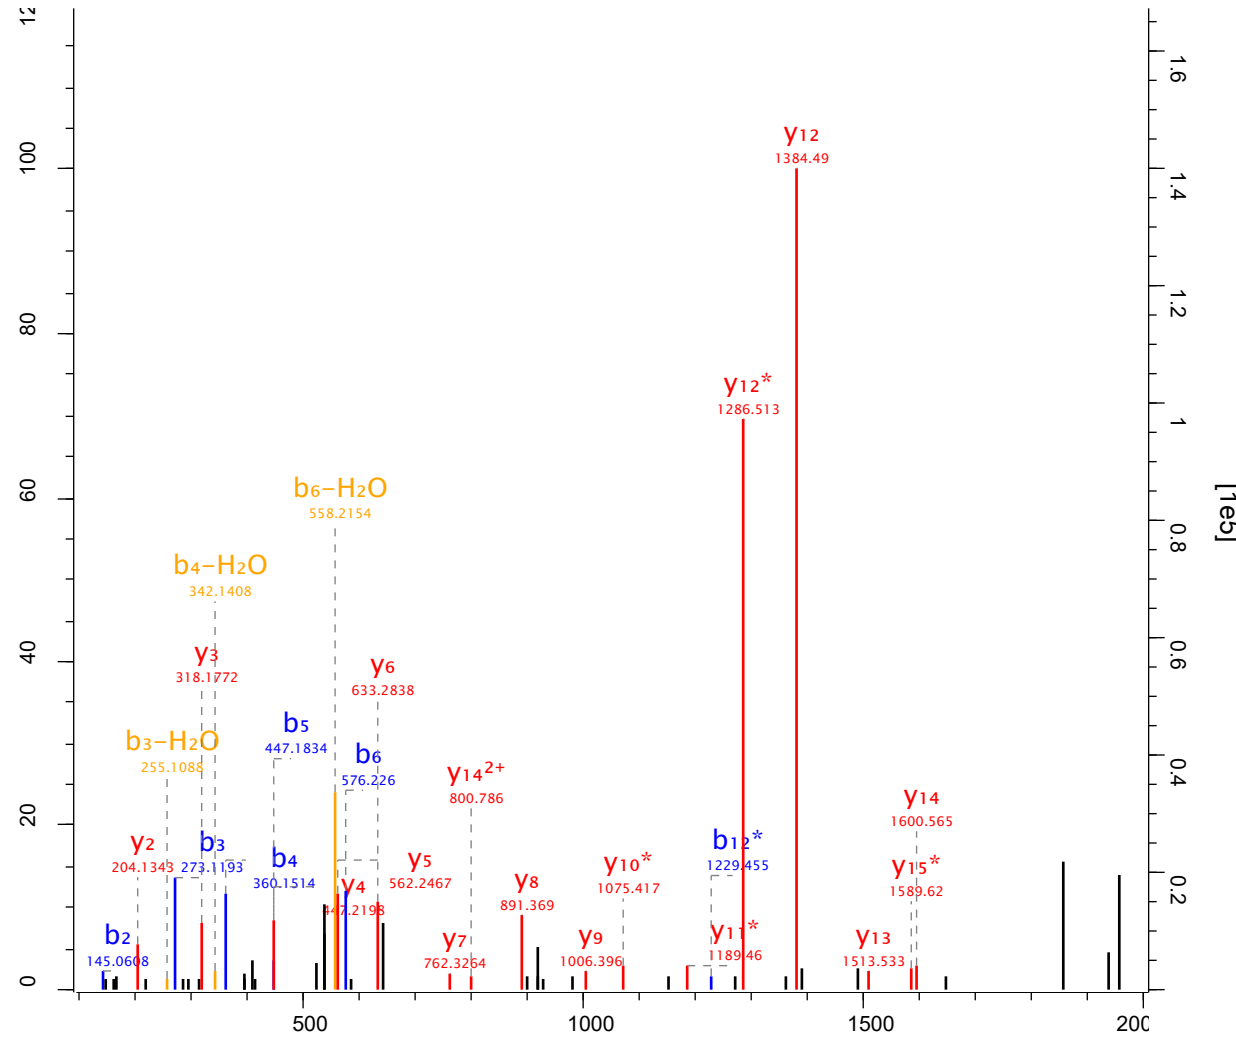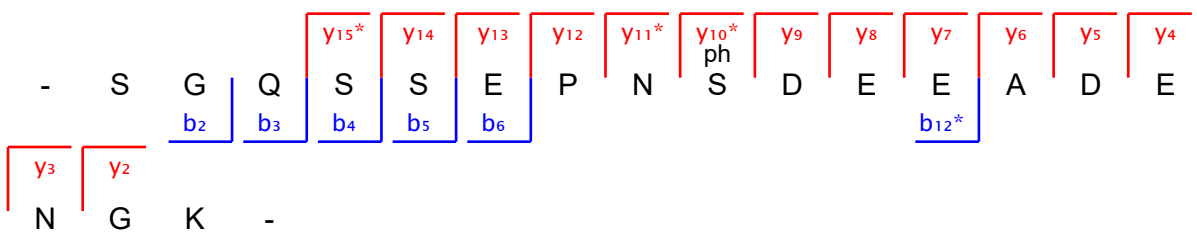

Raw file Scan Method Score m/z  
 sys\_00\_2 36121 FTMS; HCD 76.07 666.27

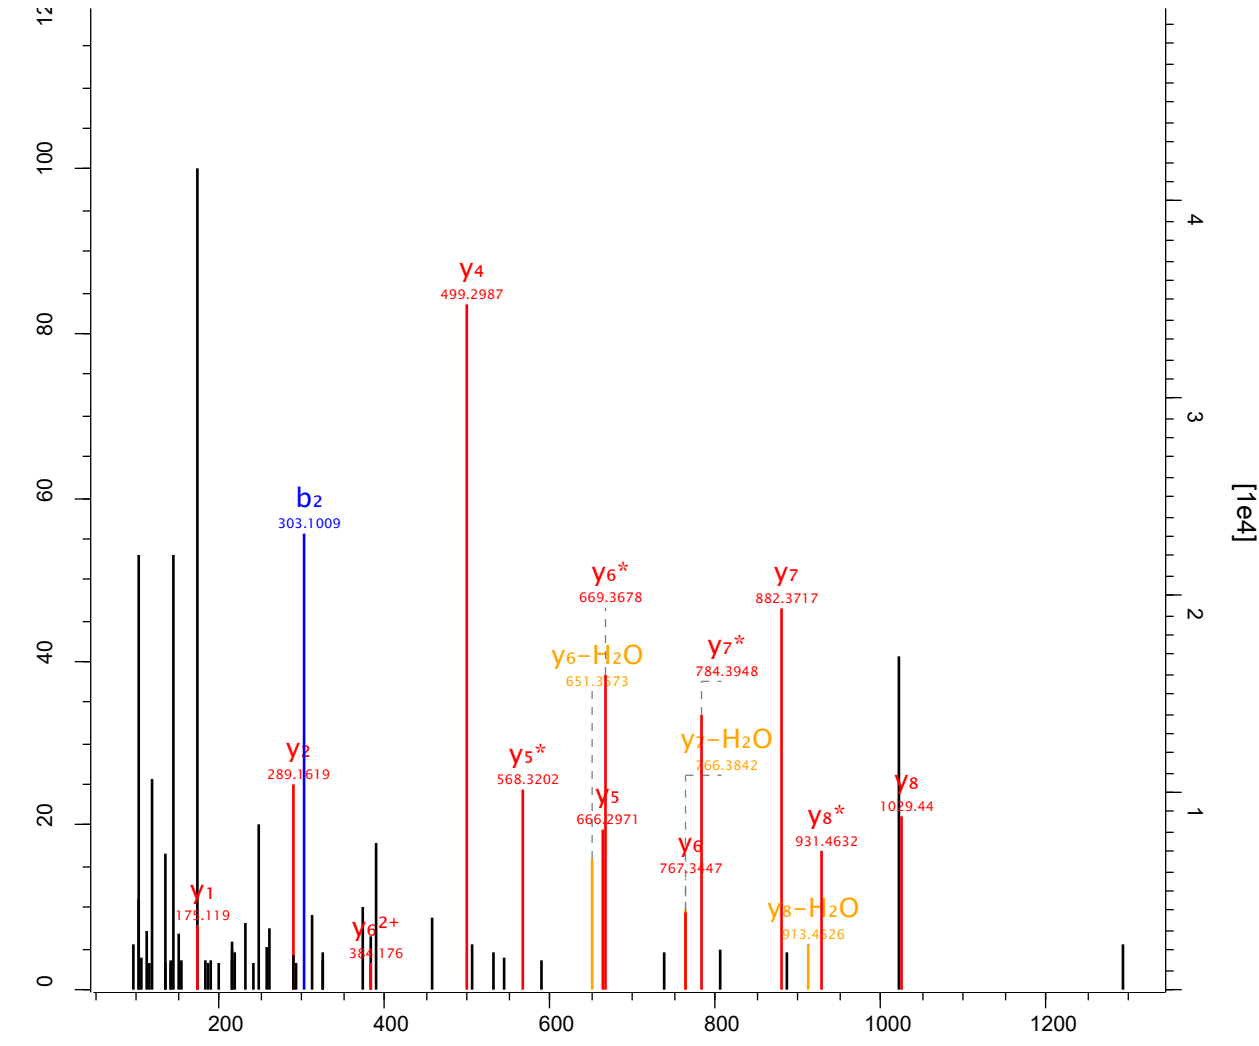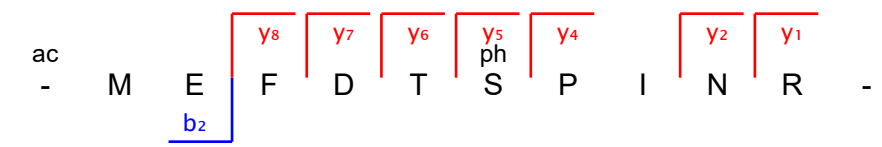

| Raw file | Scan | Method    | Score | m/z    |
|----------|------|-----------|-------|--------|
| sys_00_2 | 3993 | FTMS; HCD | 50.11 | 456.22 |

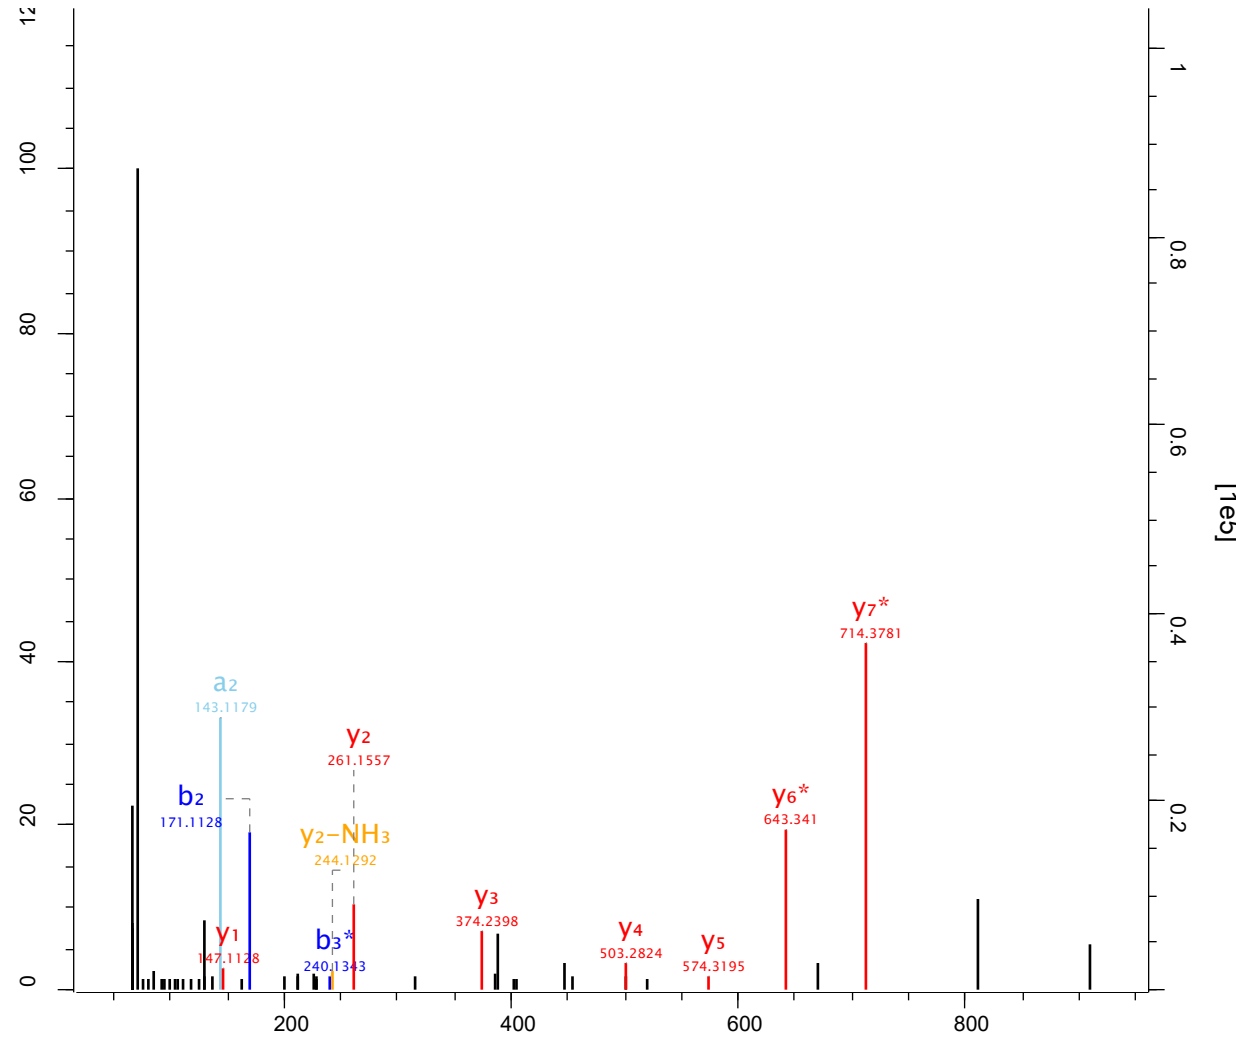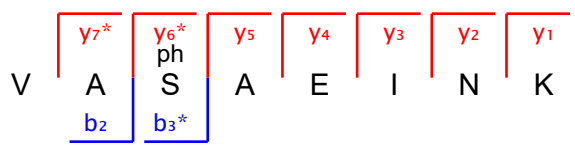

Raw file Scan Method Score m/z  
 sys\_00\_2 4203 FTMS; HCD 110.97 677.78

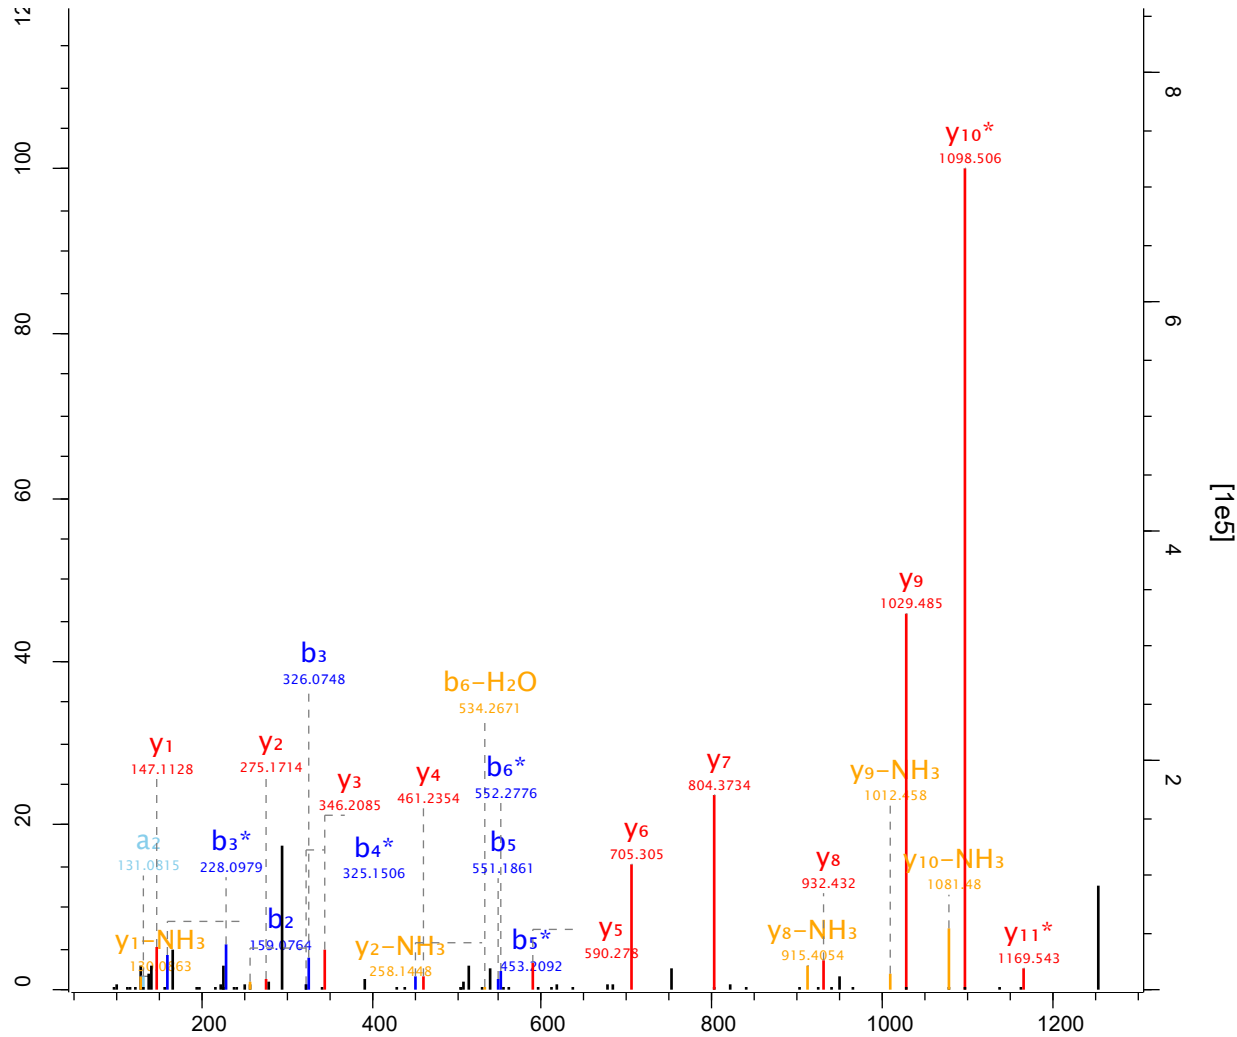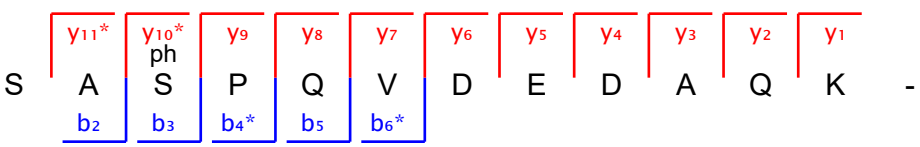

Raw file Scan Method Score m/z  
 sys\_00\_2 4253 FTMS; HCD 62.46 413.17

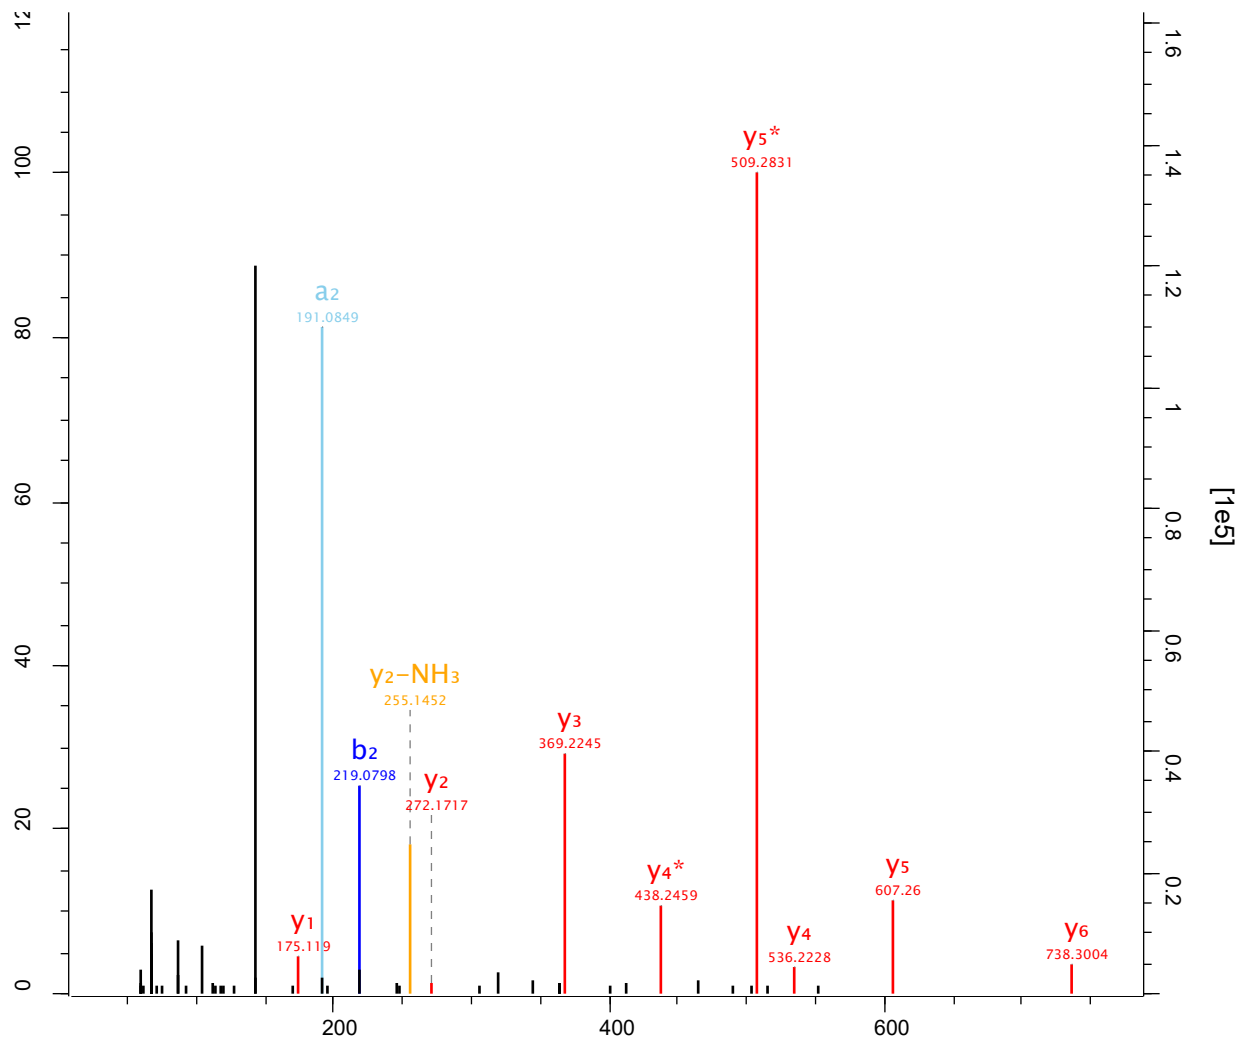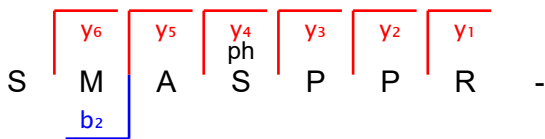

Raw file Scan Method Score m/z  
 sys\_00\_2 4275 FTMS; HCD 113.22 492.72

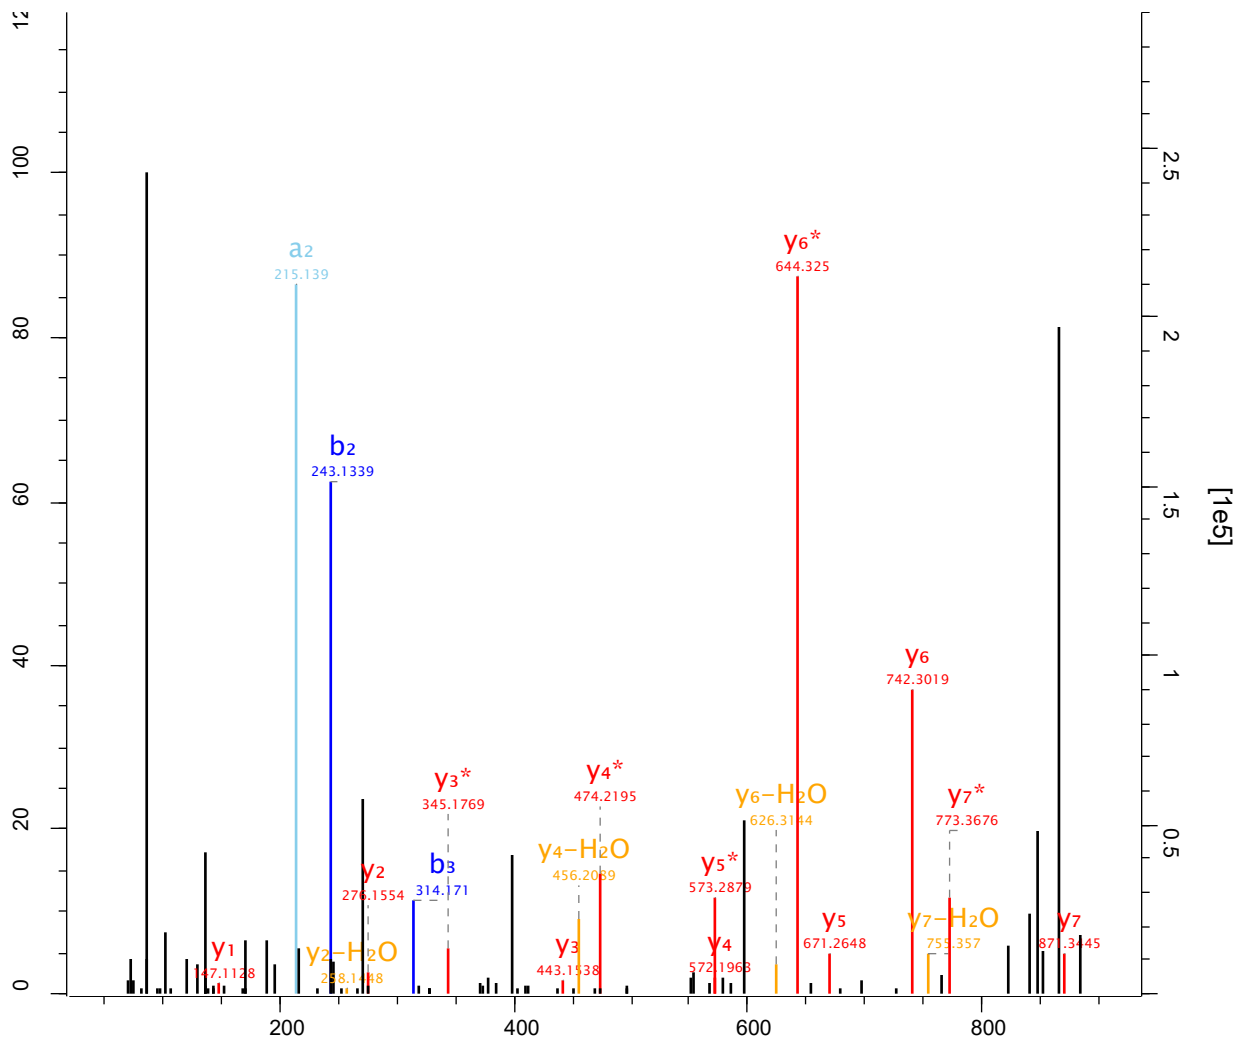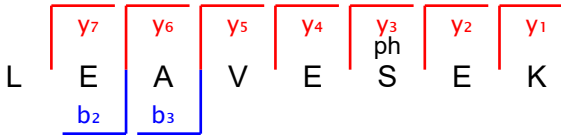

| Raw file | Scan | Method    | Score | m/z    |
|----------|------|-----------|-------|--------|
| sys_00_2 | 4437 | FTMS; HCD | 42.71 | 980.37 |

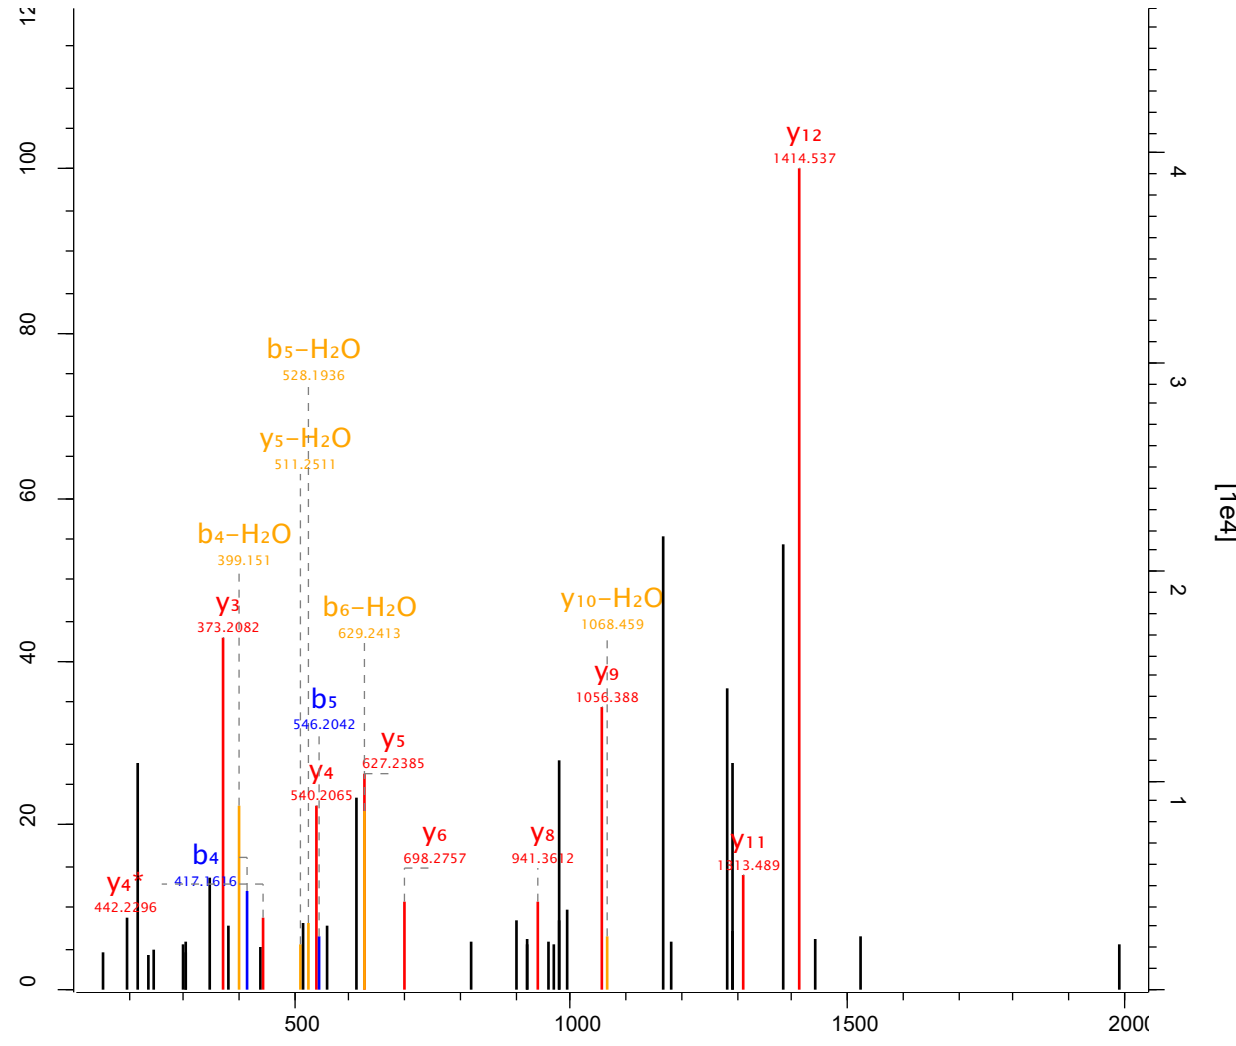

- E A S E E T E Q D N E A S S P

                  b4 b5

                  y12 y11 y9 y8 y6 y5 y4 ph y3

E K -

Raw file Scan Method Score m/z  
 sys\_00\_2 44682 FTMS; HCD 72.36 861.88

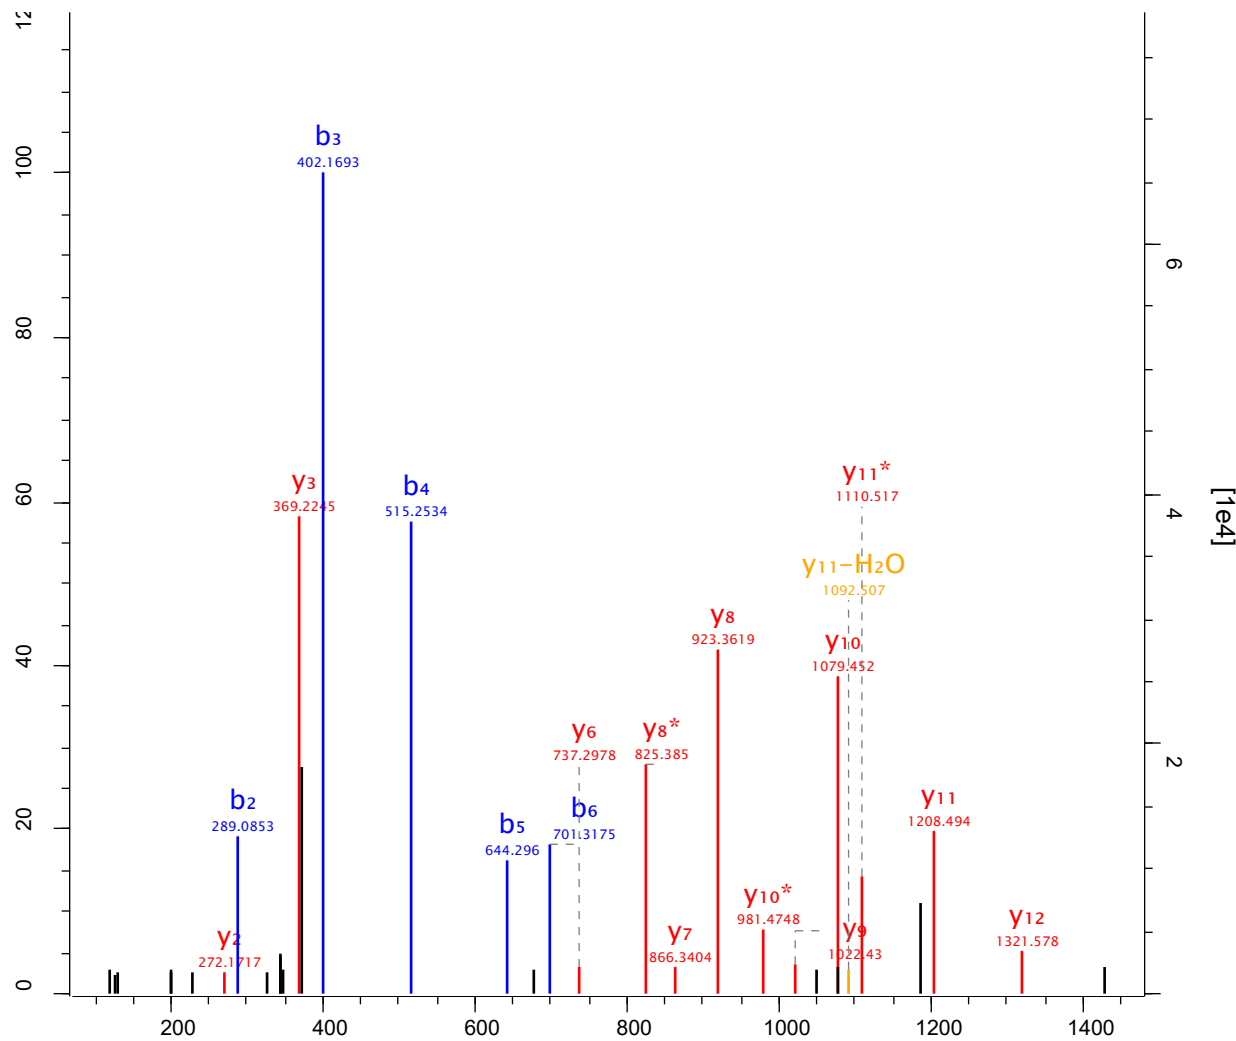

ac  
 - M D L I E G V G E N S S P P R  
 -  
 -

Fragmentation mapping (b and y ions):

- b<sub>2</sub> (D), b<sub>3</sub> (L), b<sub>4</sub> (I), b<sub>5</sub> (E), b<sub>6</sub> (G)
- y<sub>12</sub> (I), y<sub>11</sub> (E), y<sub>10</sub> (G), y<sub>9</sub> (V), y<sub>8</sub> (G), y<sub>7</sub> (E), y<sub>6</sub> (N)
- y<sub>3</sub> (S), y<sub>2</sub> (P)



Raw file Scan Method Score m/z  
 sys\_00\_2 4939 FTMS; HCD 72.7 541.25

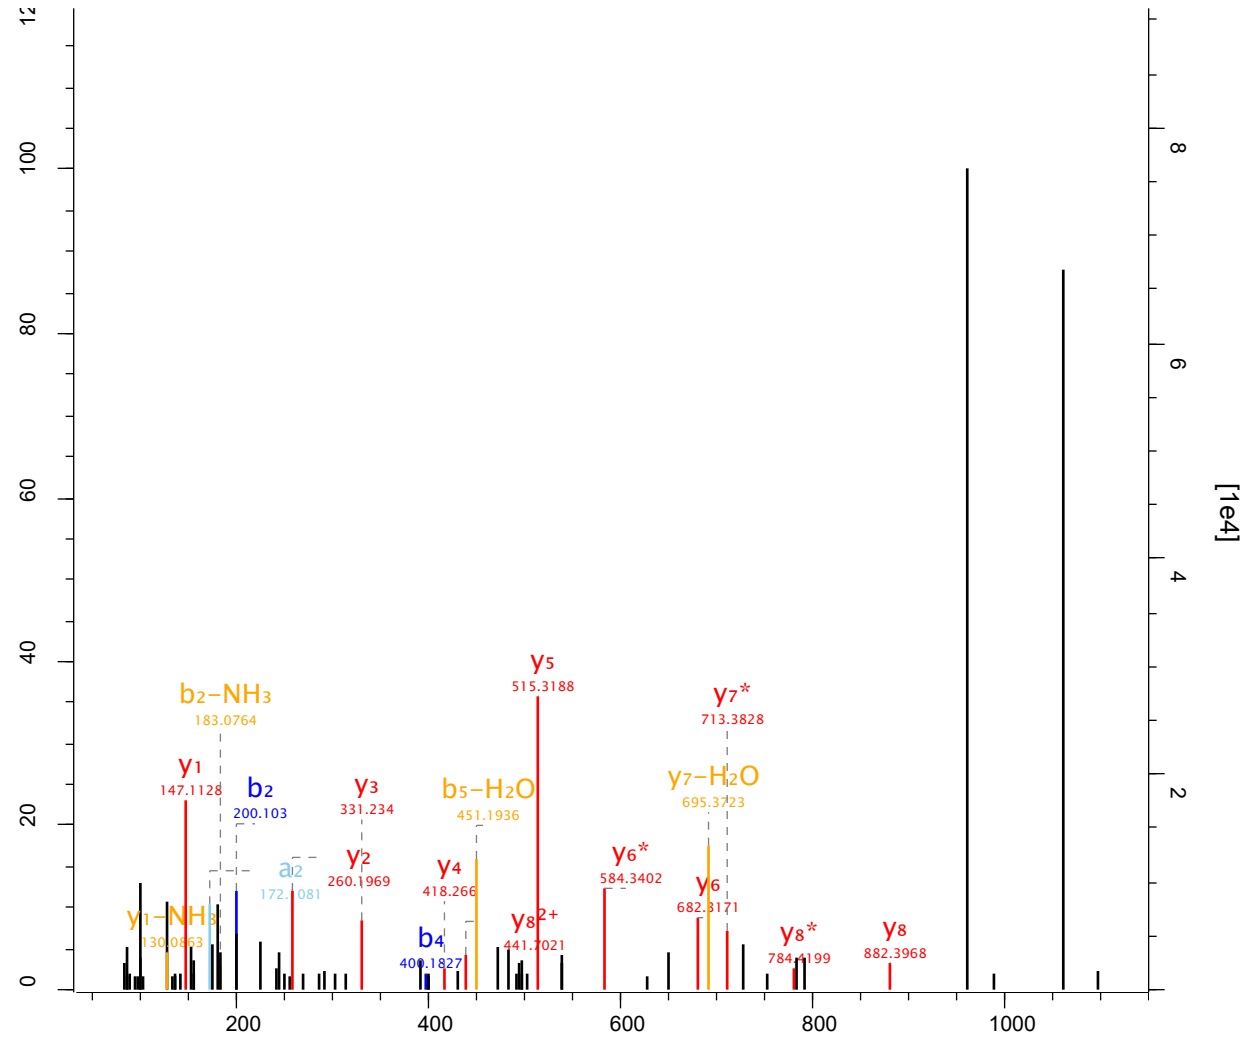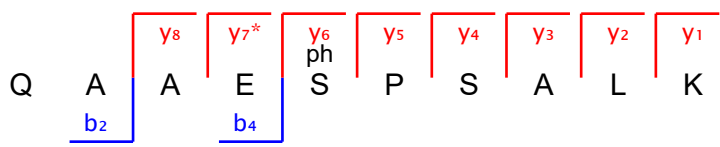

Raw file Scan Method Score m/z  
 sys\_00\_2 5489 FTMS; HCD 77.66 529.72

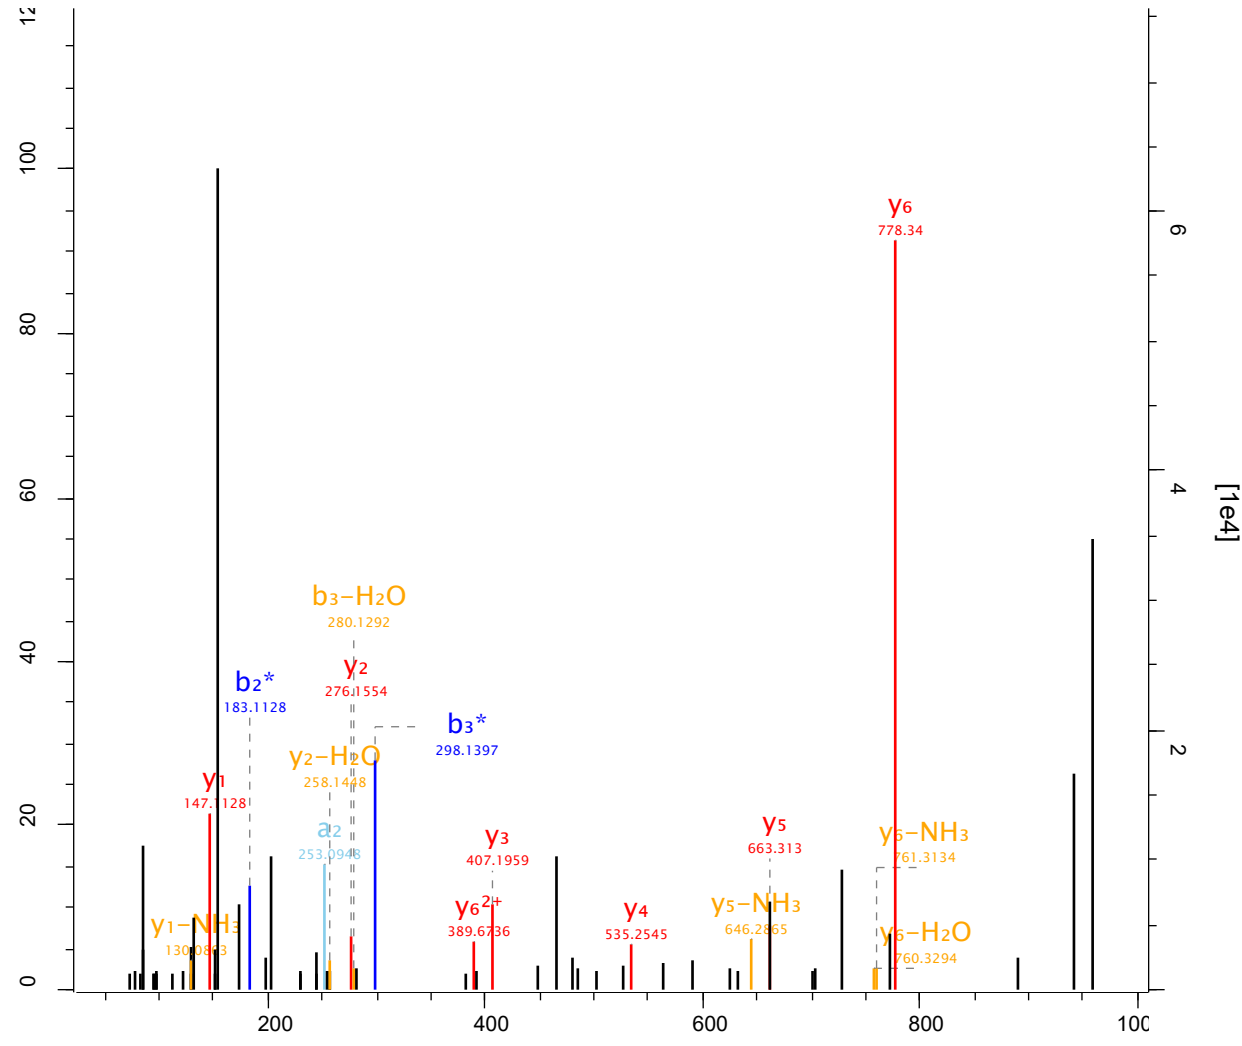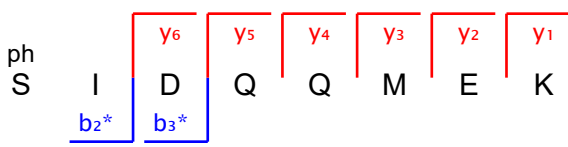

| Raw file | Scan | Method    | Score | m/z    |
|----------|------|-----------|-------|--------|
| sys_00_2 | 5669 | FTMS; HCD | 55.31 | 556.24 |

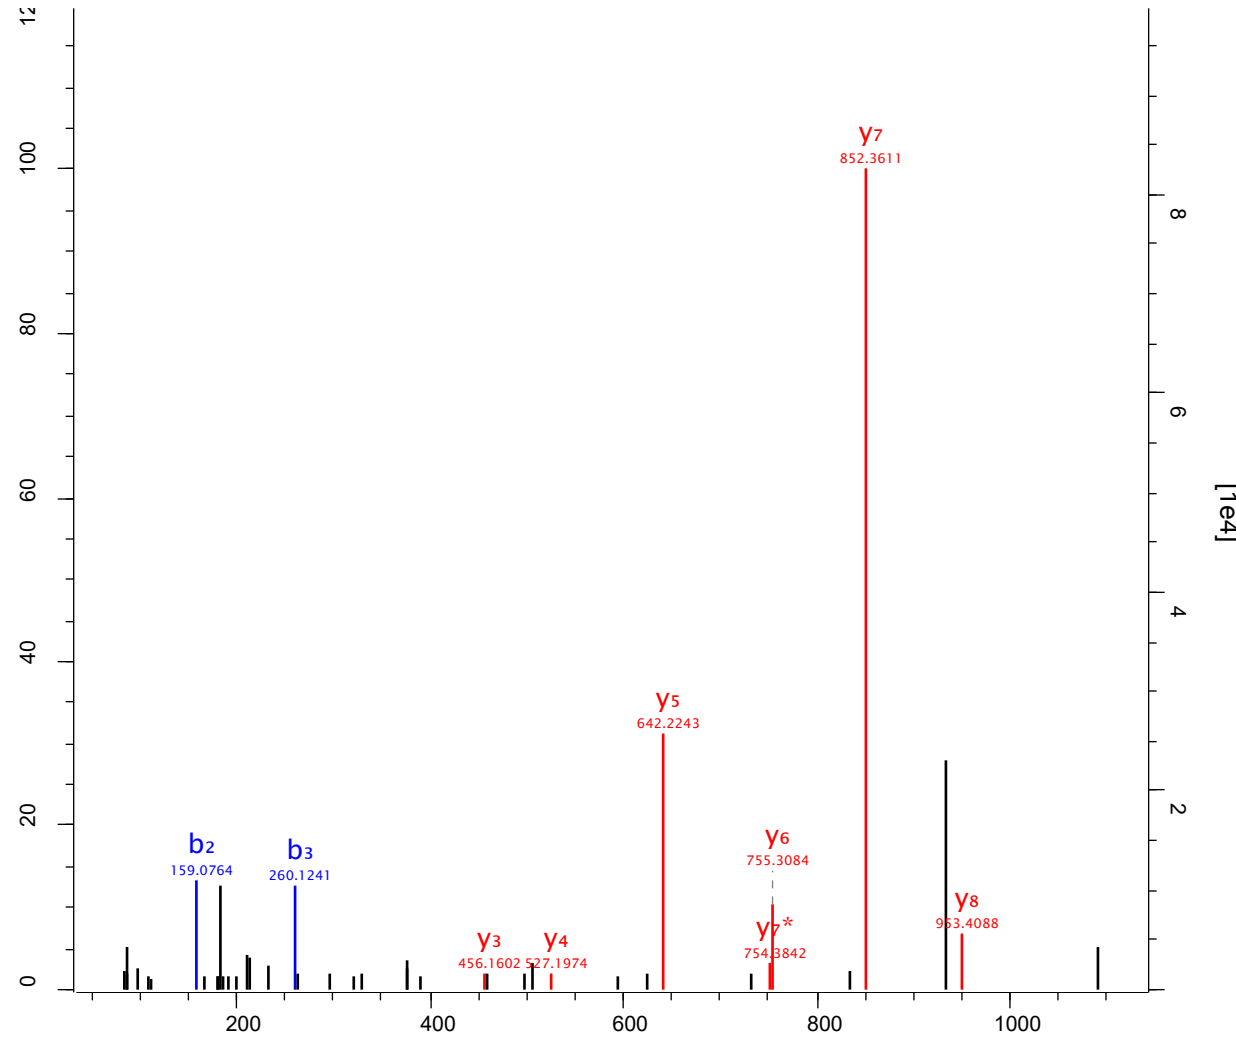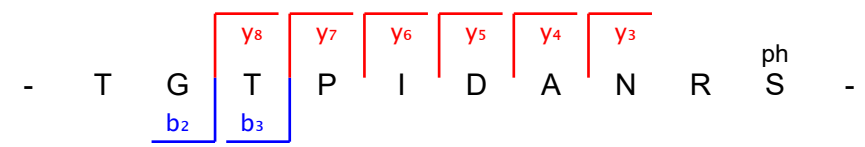

Raw file Scan Method Score m/z  
 sys\_00\_2 5851 FTMS; HCD 99.97 469.72

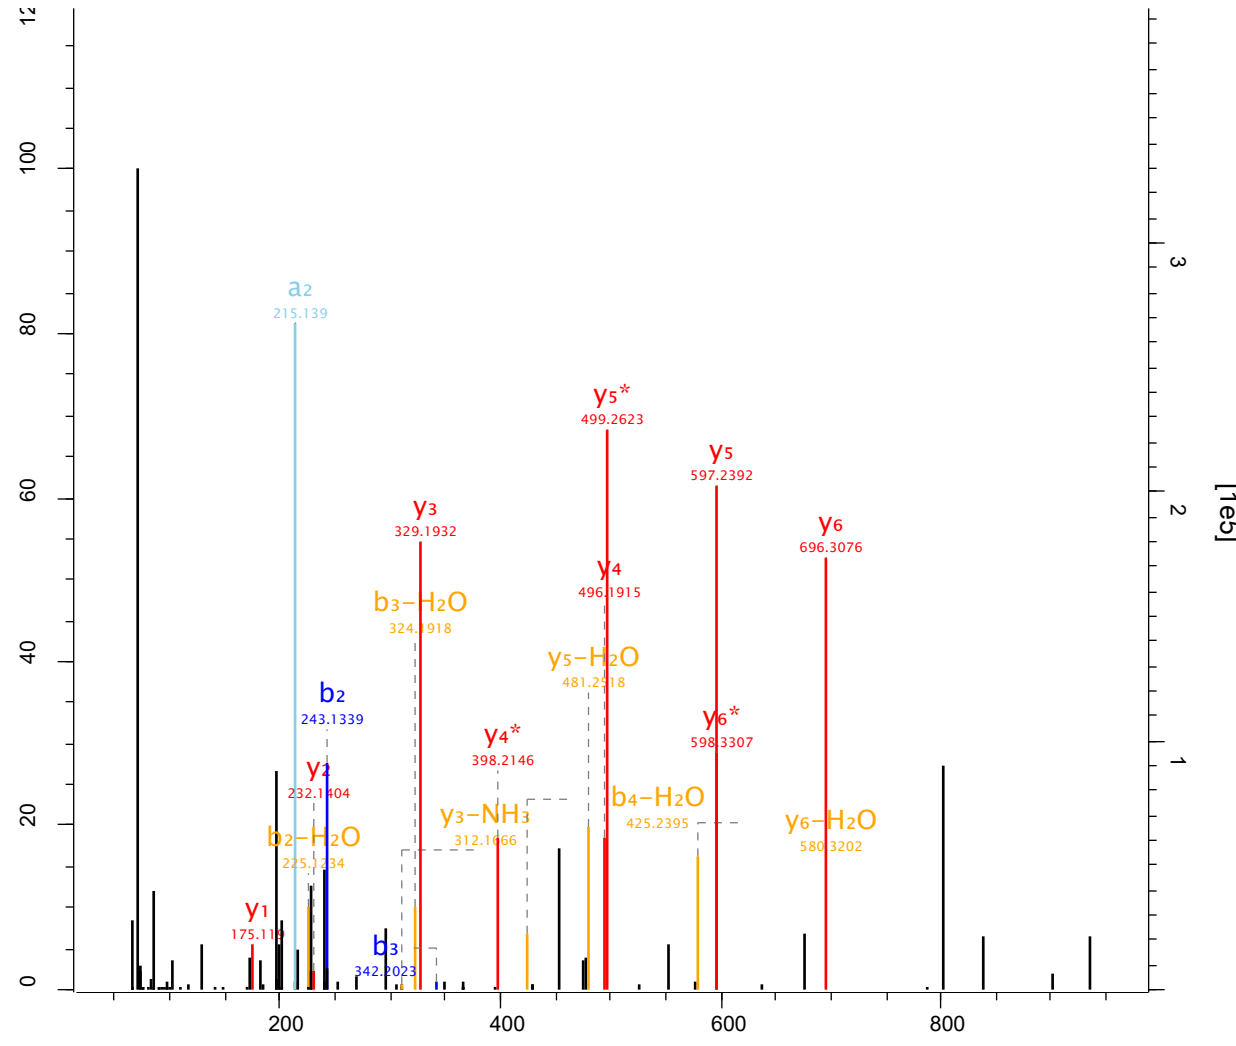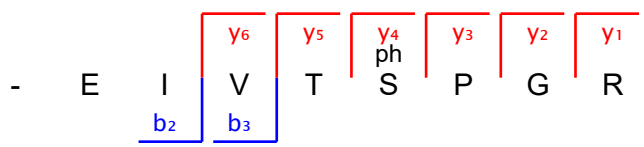

| Raw file | Scan | Method    | Score | m/z   |
|----------|------|-----------|-------|-------|
| sys_00_2 | 6408 | FTMS; HCD | 91.09 | 419.2 |

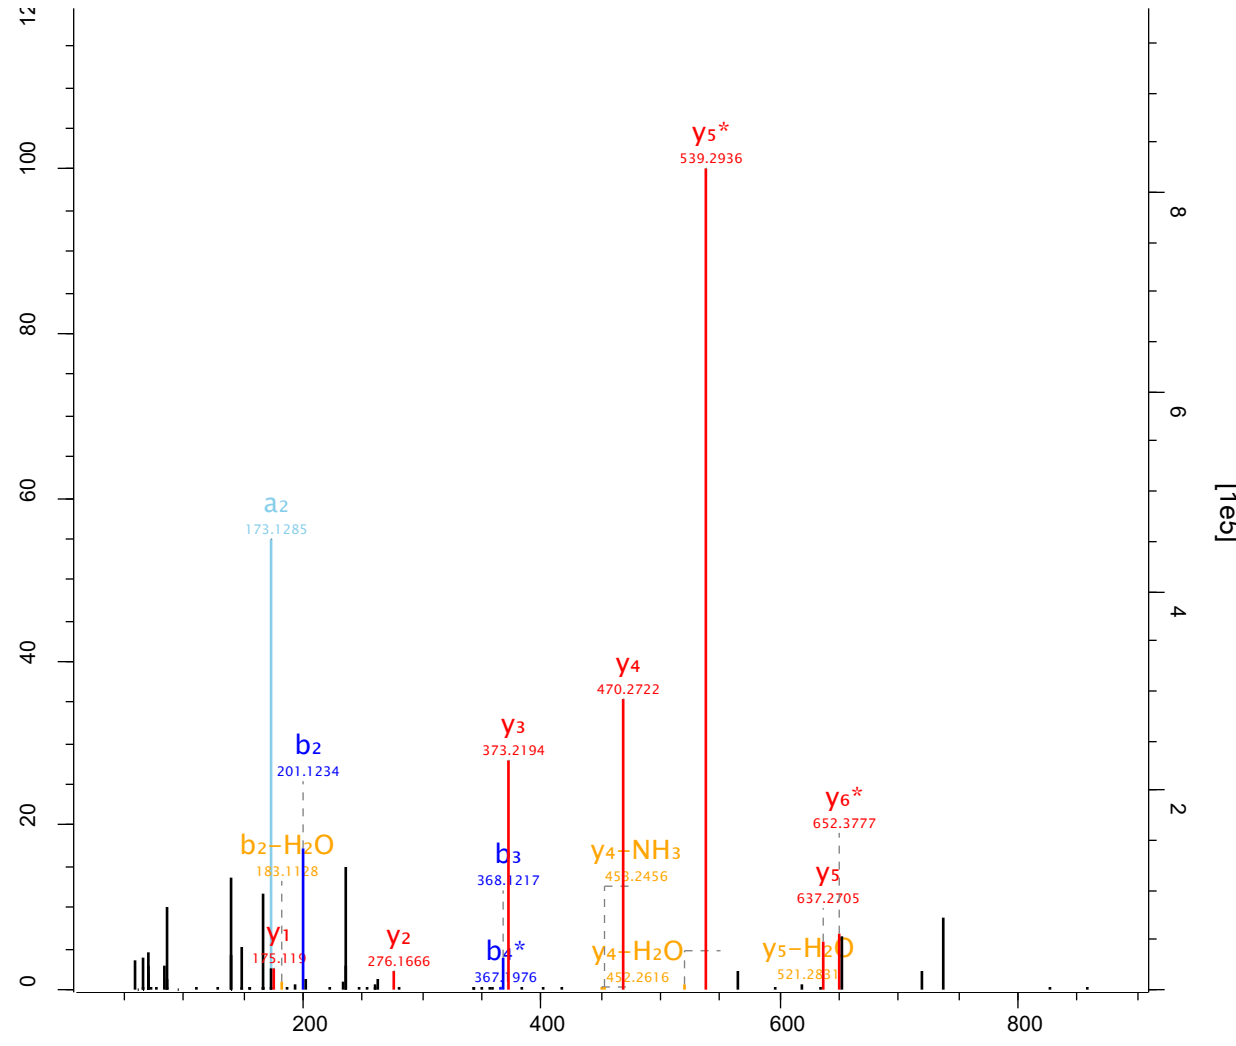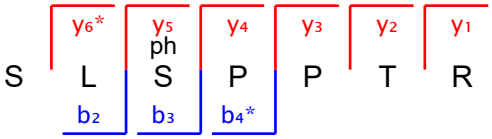

| Raw file | Scan | Method    | Score | m/z    |
|----------|------|-----------|-------|--------|
| sys_00_2 | 6656 | FTMS; HCD | 42.84 | 513.23 |

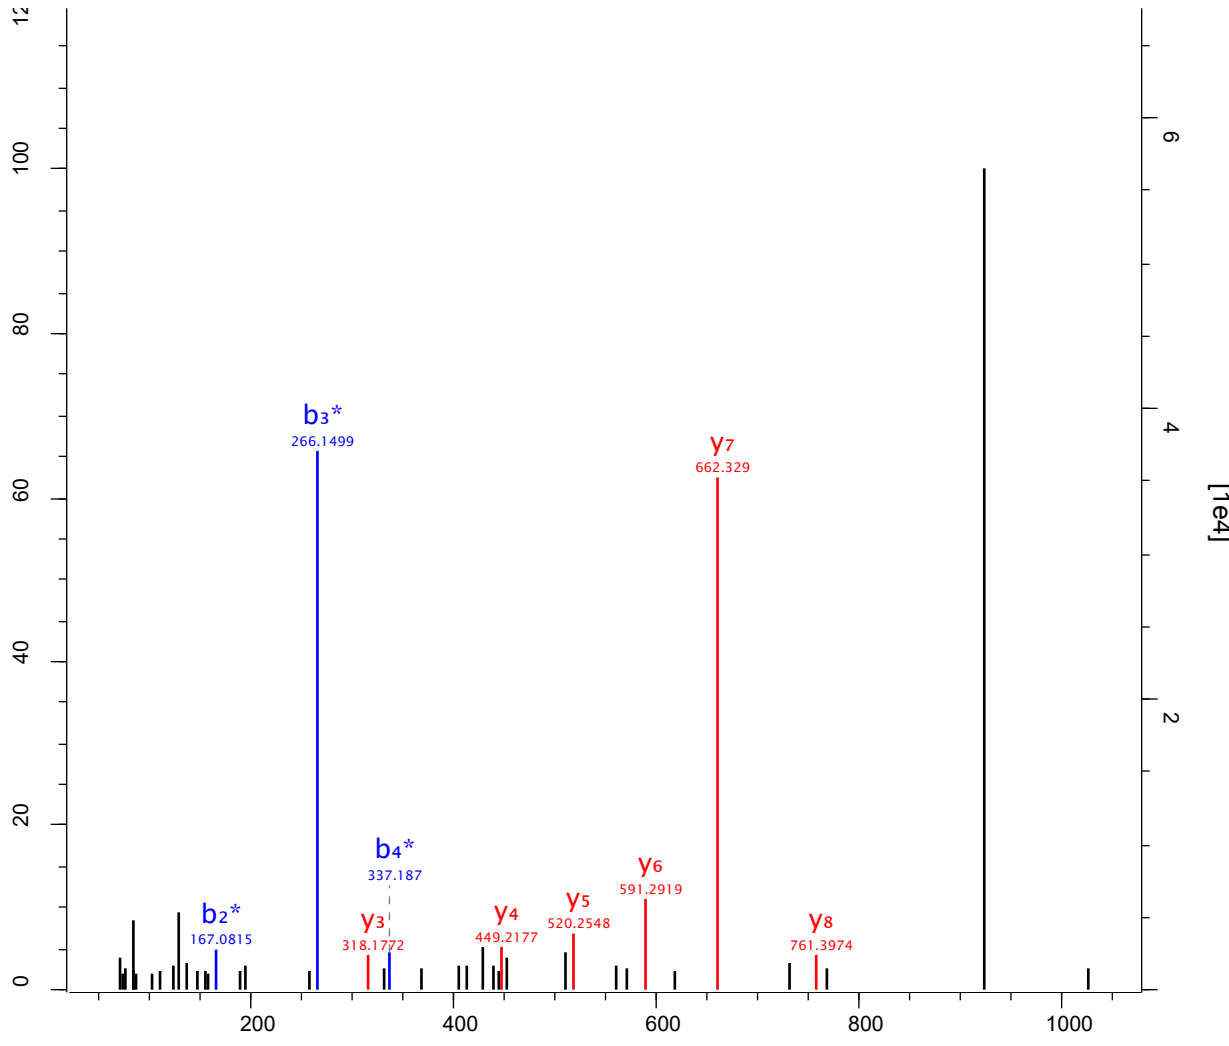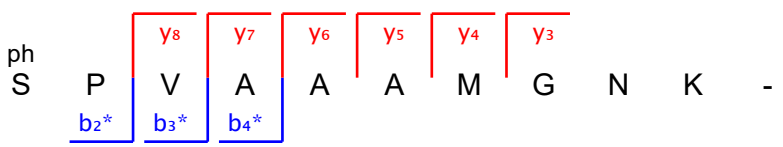

| Raw file | Scan | Method    | Score | m/z    |
|----------|------|-----------|-------|--------|
| sys_00_2 | 6933 | FTMS; HCD | 78.1  | 429.18 |

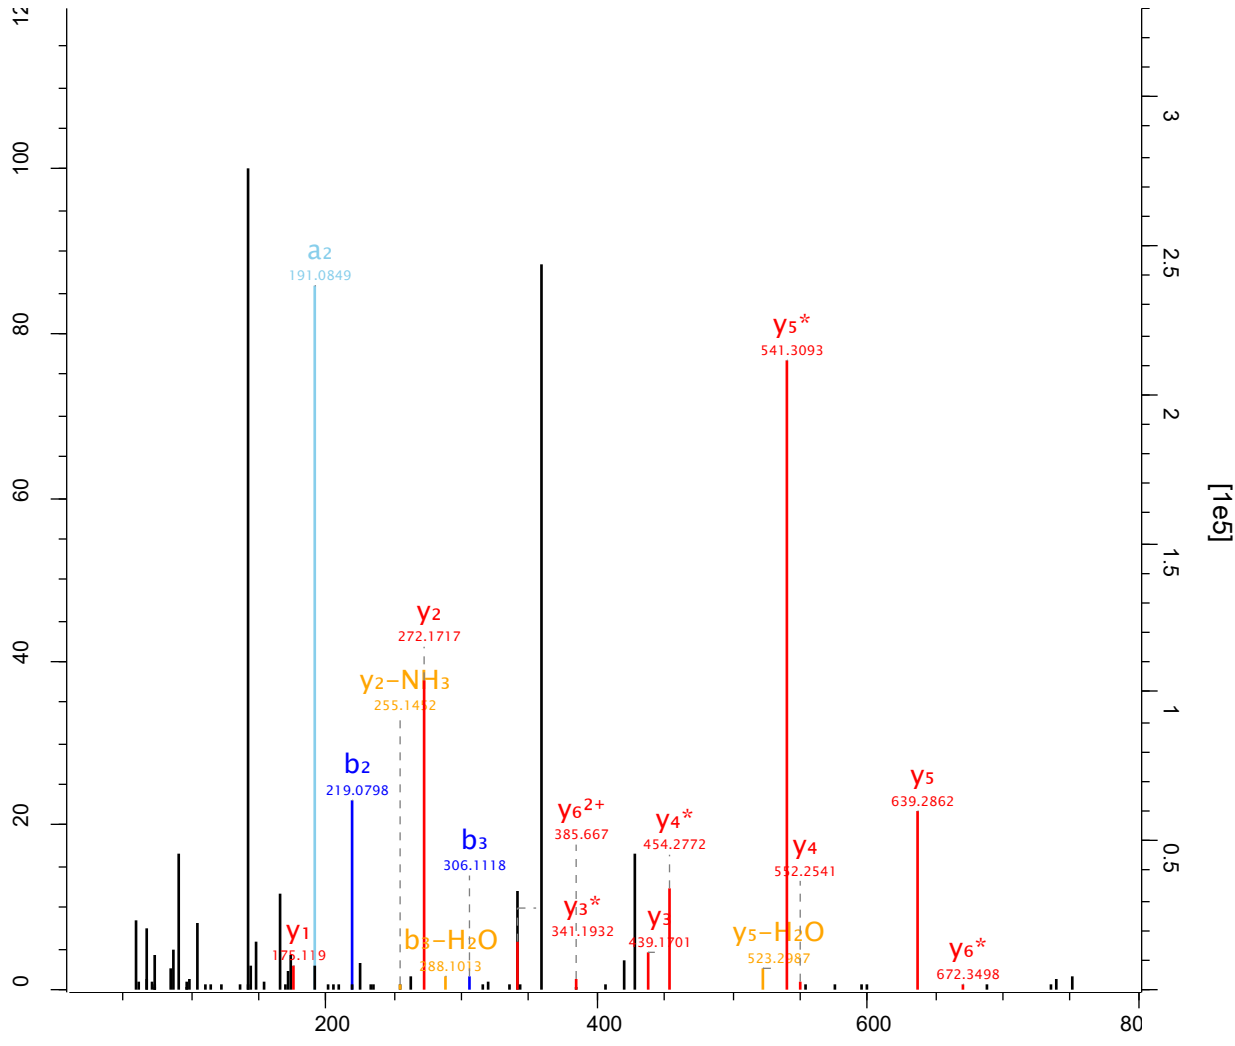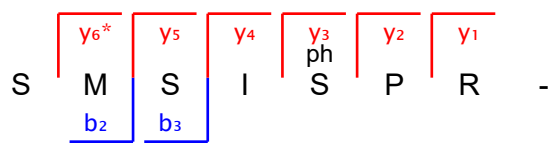

| Raw file | Scan | Method    | Score | m/z    |
|----------|------|-----------|-------|--------|
| sys_00_2 | 7343 | FTMS; HCD | 91.31 | 586.23 |

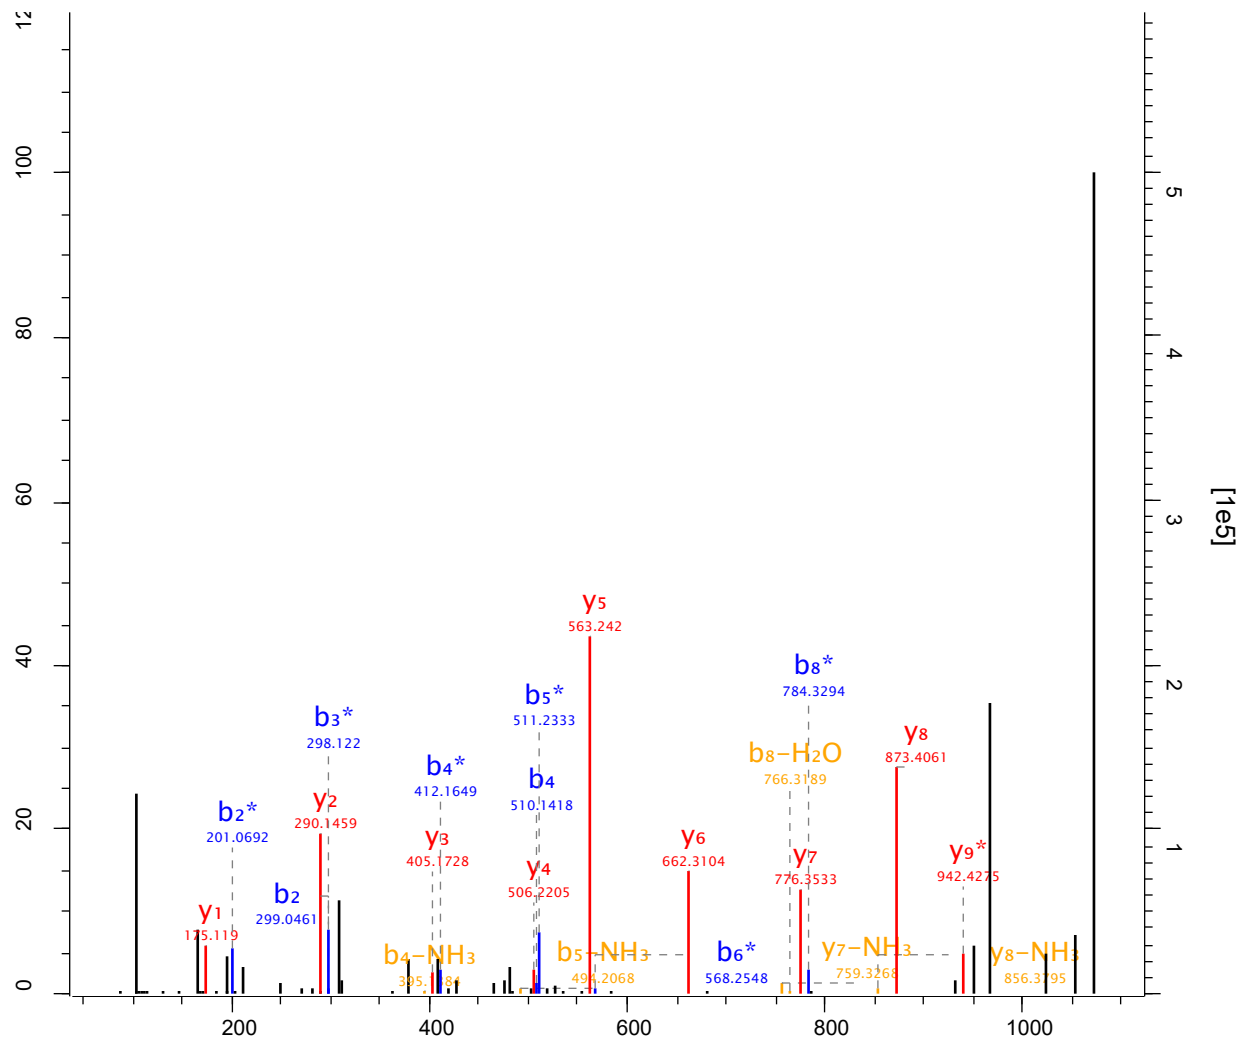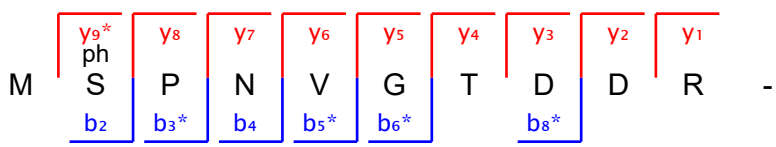



Raw file Scan Method Score m/z  
 sys\_00\_2 7606 FTMS; HCD 62.86 728.32

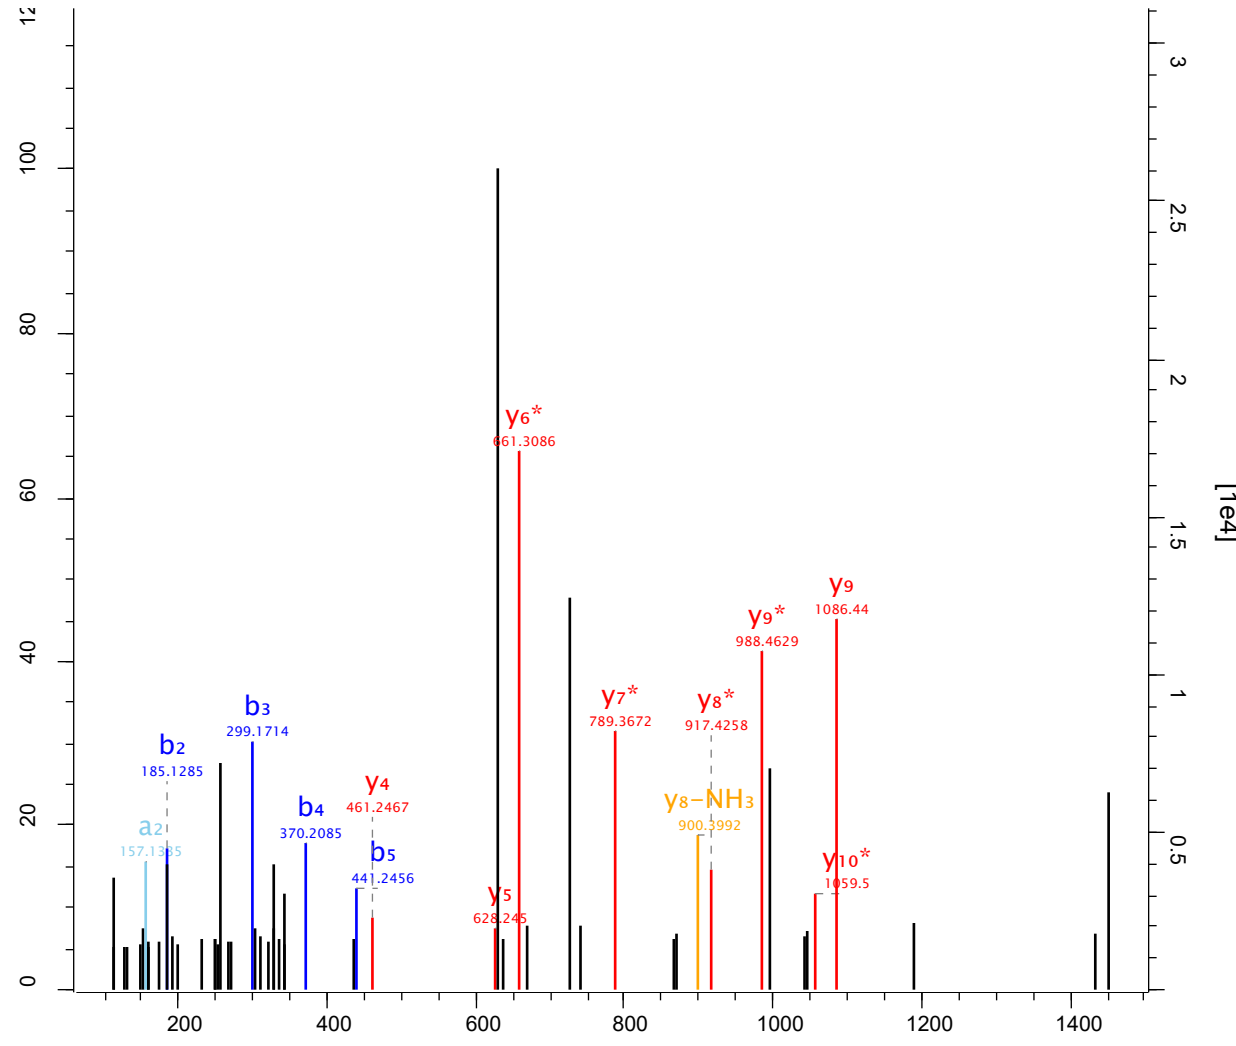

- I A N A A Q Q M S N A T R -  
 b2 b3 b4 b5 y10\* y9 y8\* y7\* y6\* y5 ph y4

Raw file Scan Method Score m/z  
 sys\_00\_2 8276 FTMS; HCD 126.09 626.76

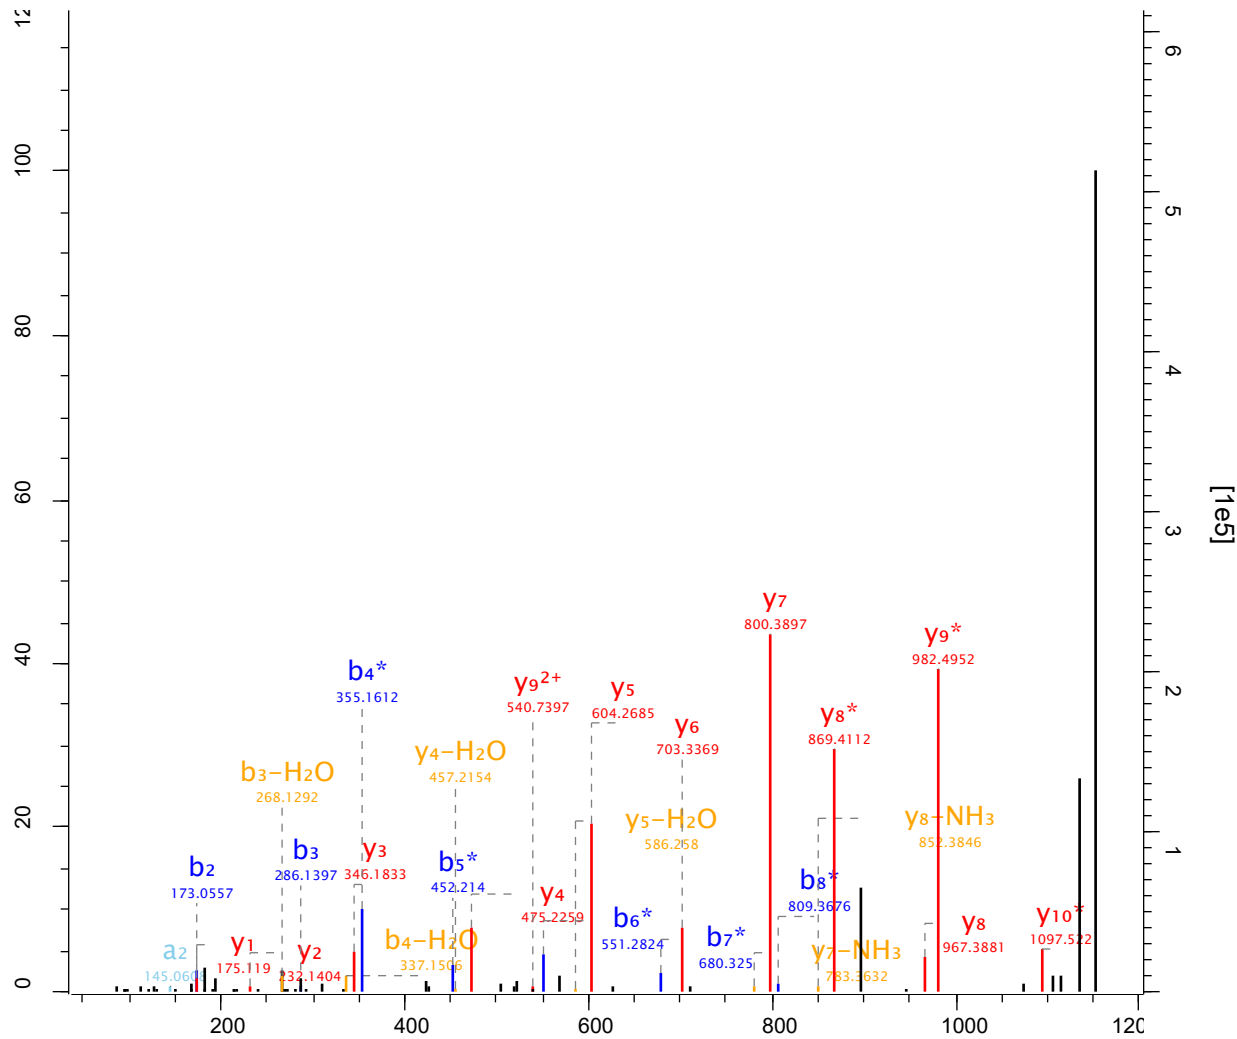

G y10\* y9\* y8  
ph y7 y6 y5 y4 y3 y2 y1 -

G b2 b3 b4\* b5\* b6\* b7\* b8\* N G R -

Raw file Scan Method Score m/z  
 sys\_00\_2 8553 FTMS; HCD 139.7 561.27

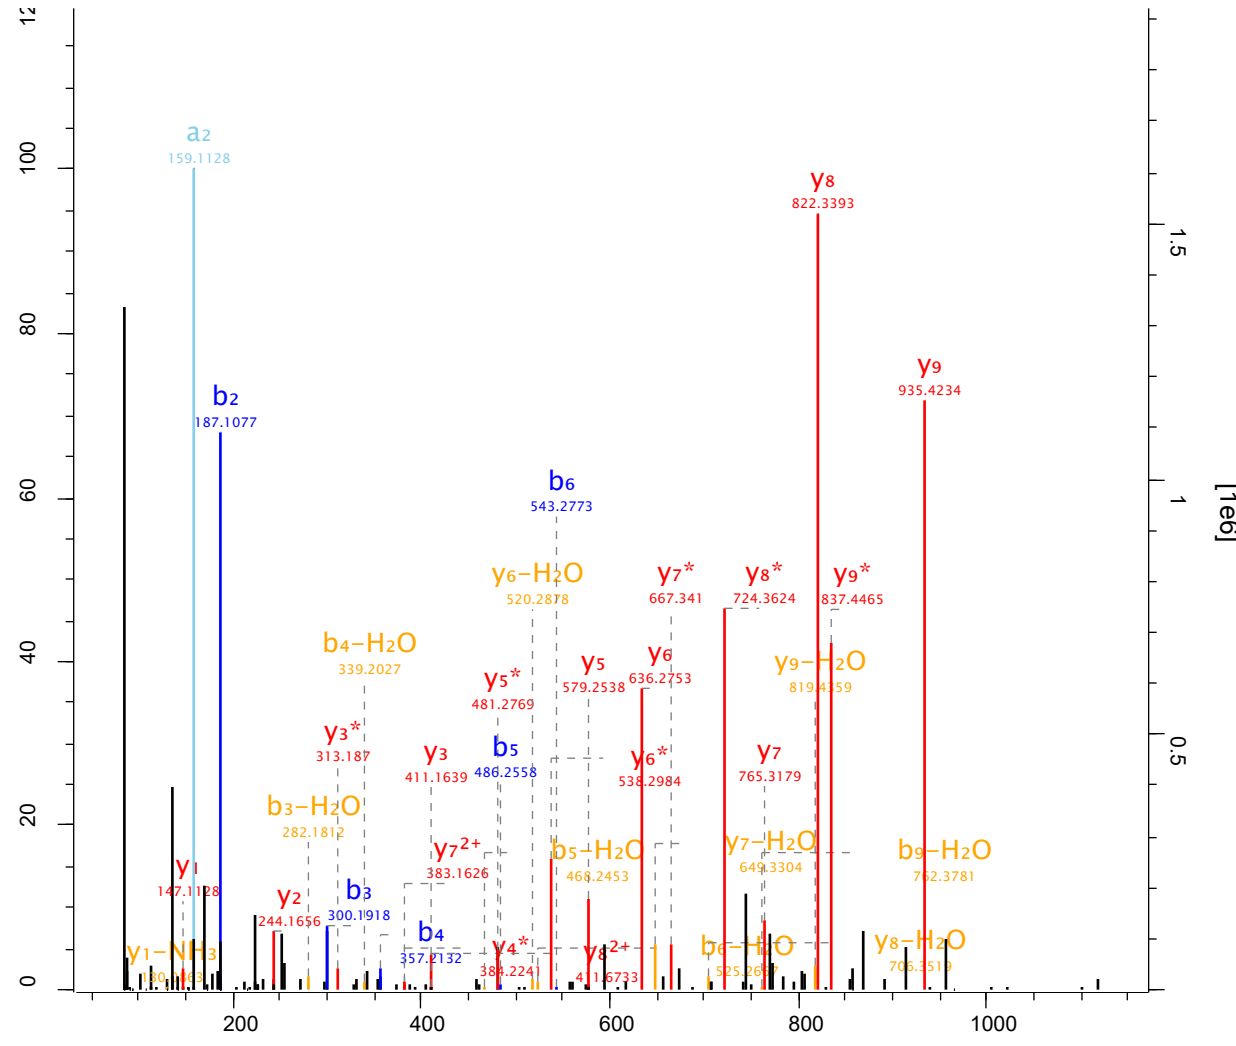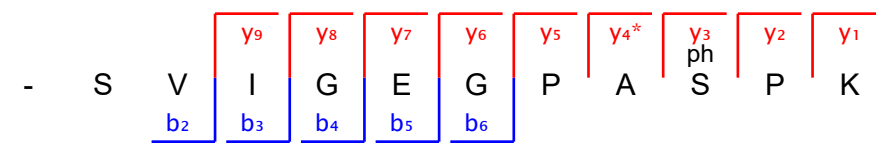

Raw file Scan Method Score m/z  
 sys\_00\_2 8753 FTMS; HCD 148.18 562.76

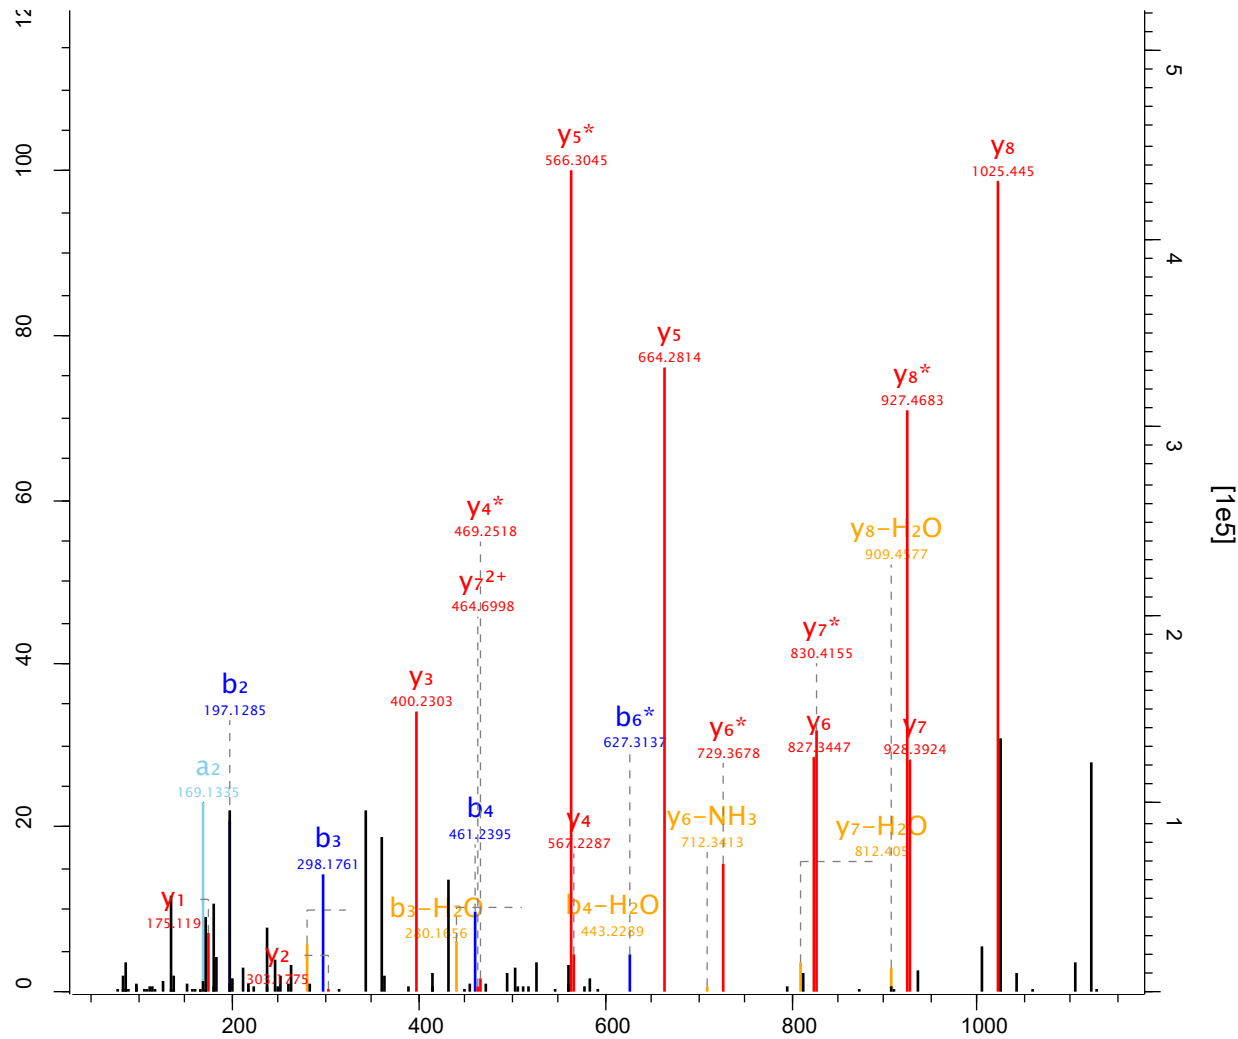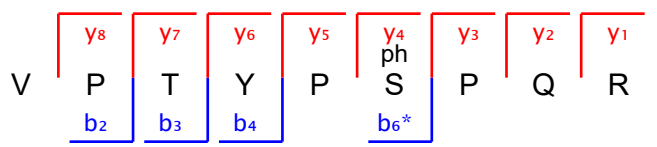

Raw file Scan Method Score m/z  
 sys\_00\_2 8885 FTMS; HCD 40.94 651.26

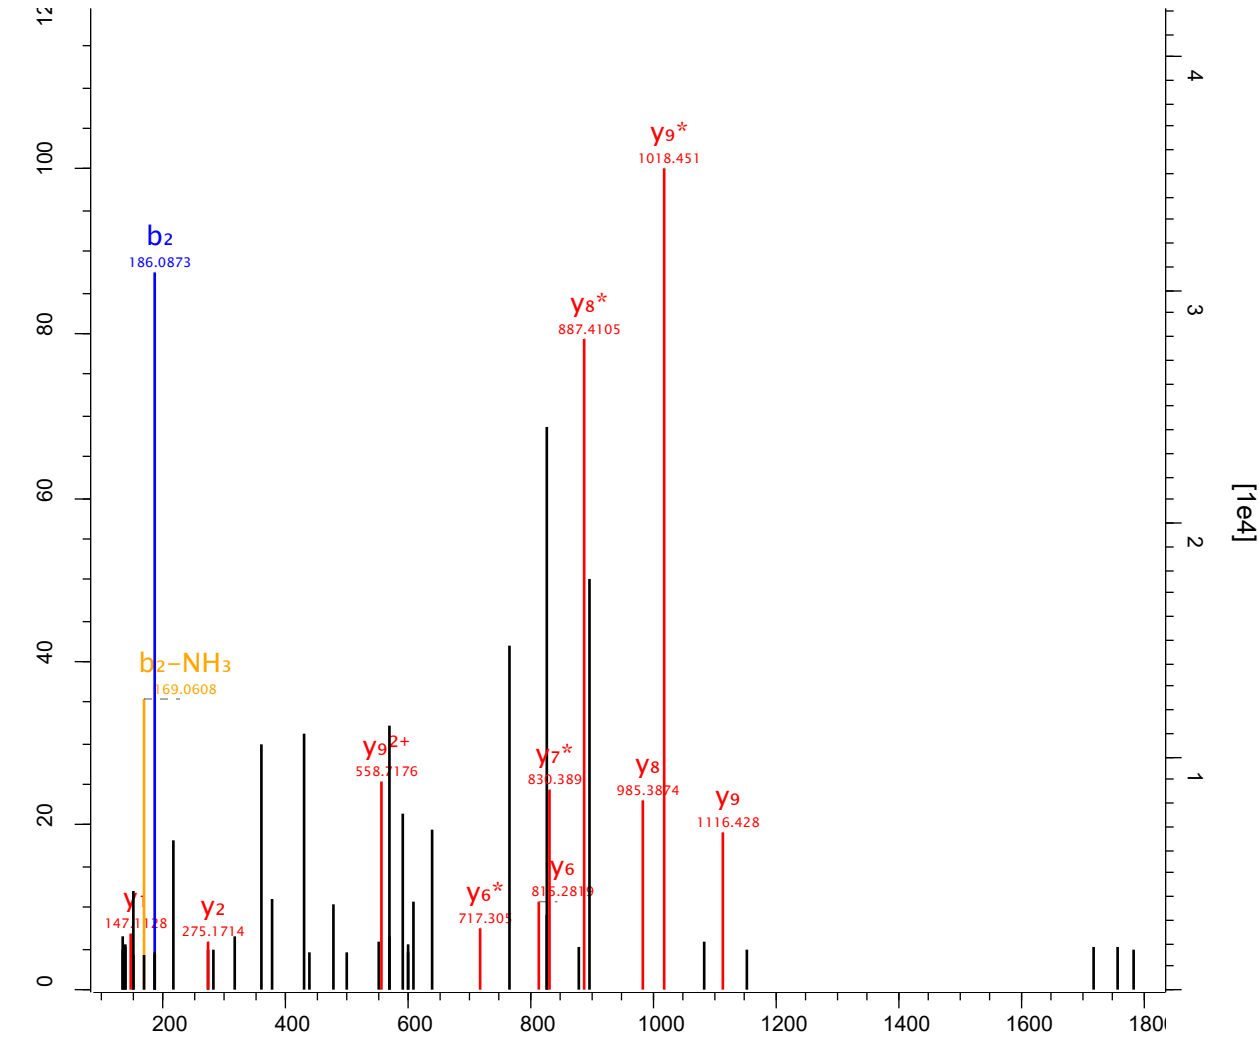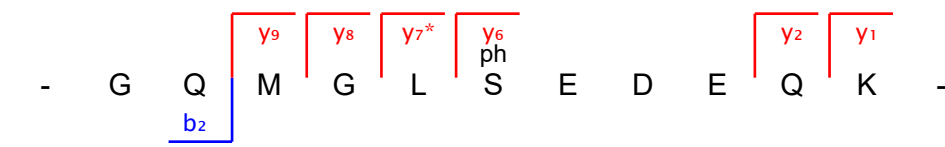

Raw file Scan Method Score m/z  
 sys\_00\_2 9070 FTMS; HCD 179.67 570.77

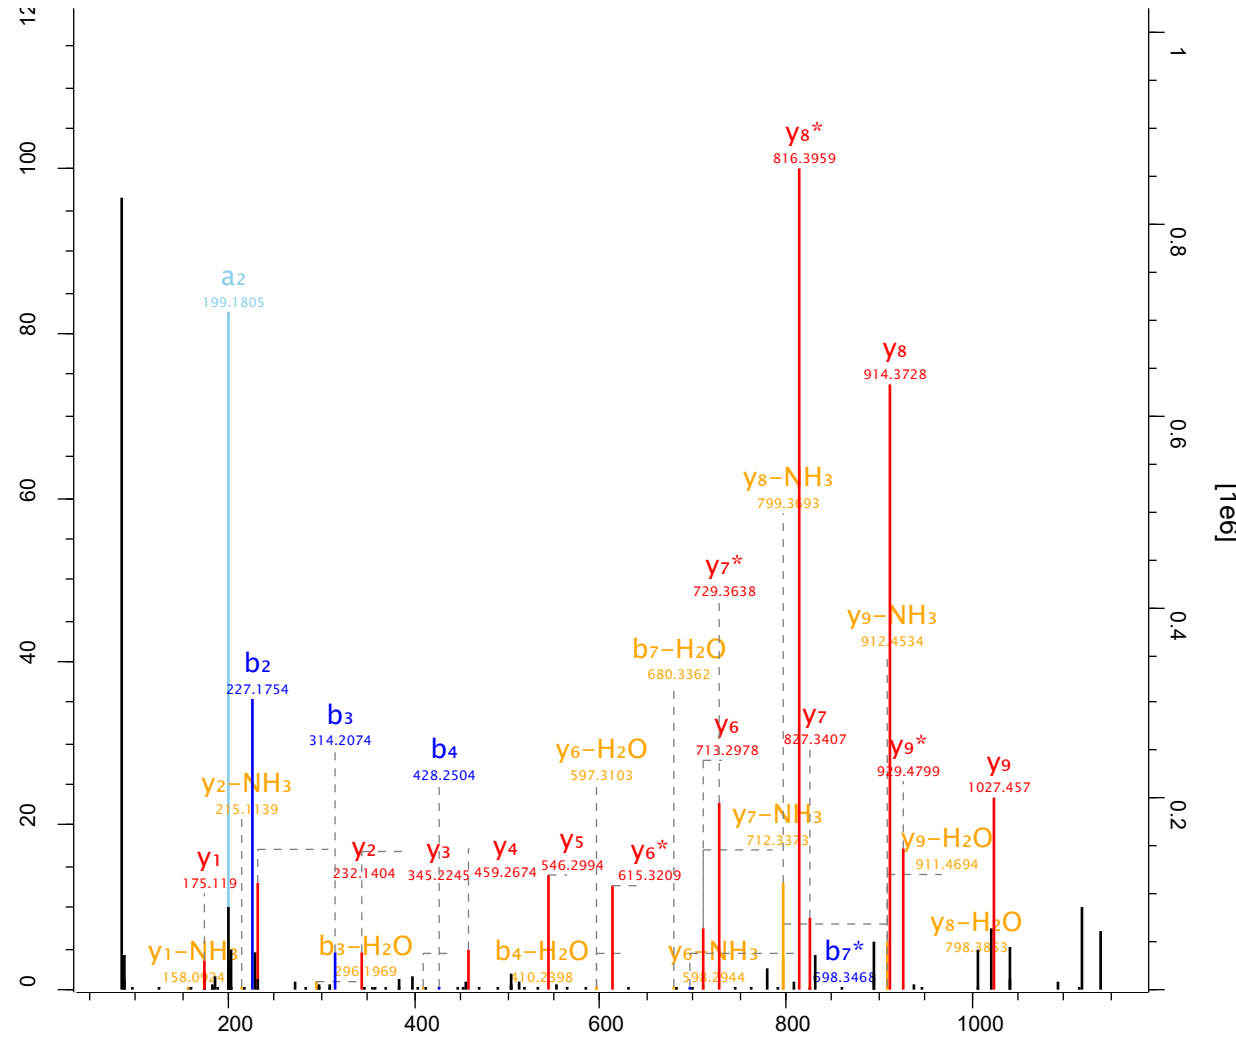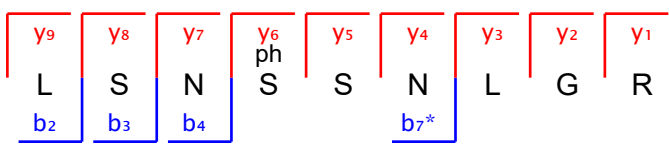

| Raw file | Scan | Method    | Score | m/z    |
|----------|------|-----------|-------|--------|
| sys_00_2 | 9125 | FTMS; HCD | 72.61 | 591.28 |

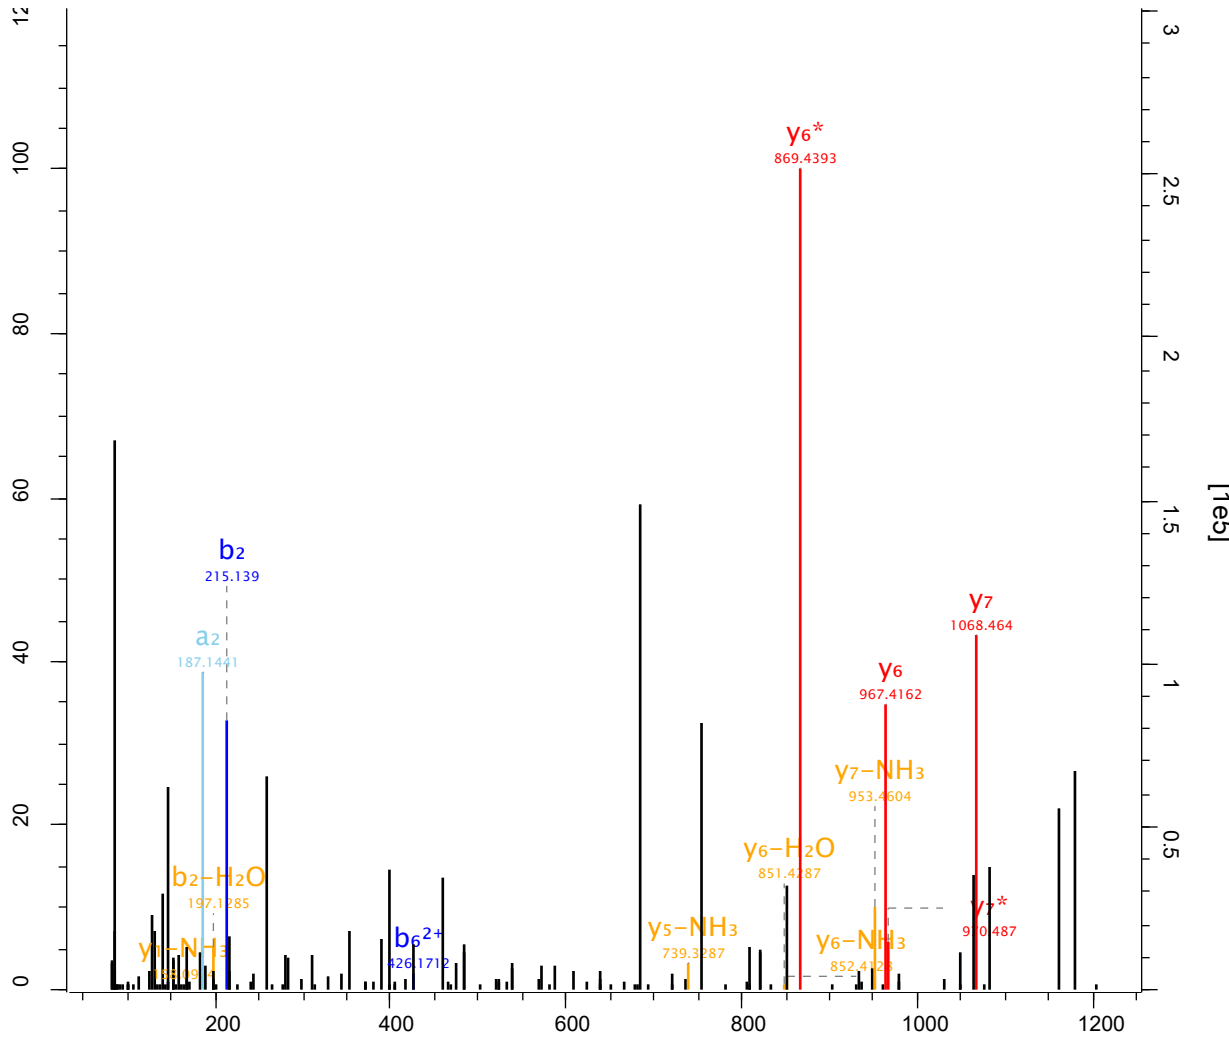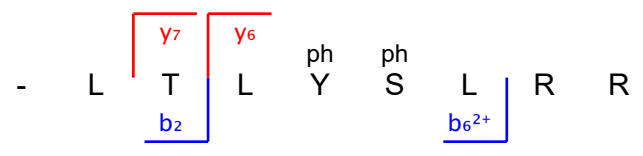

| Raw file | Scan | Method    | Score  | m/z    |
|----------|------|-----------|--------|--------|
| sys_00_2 | 9319 | FTMS; HCD | 118.28 | 476.71 |

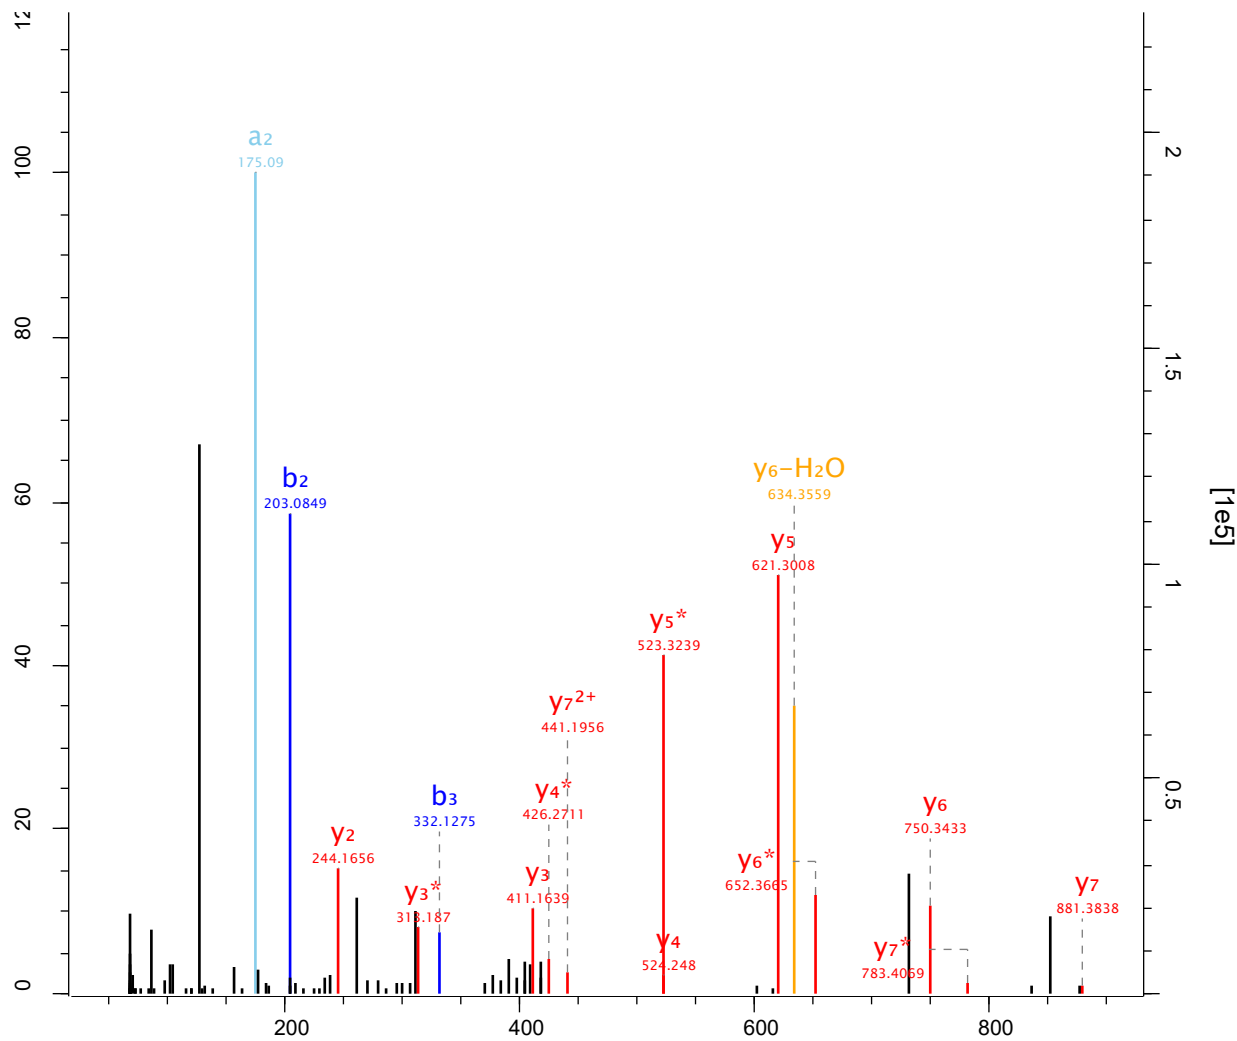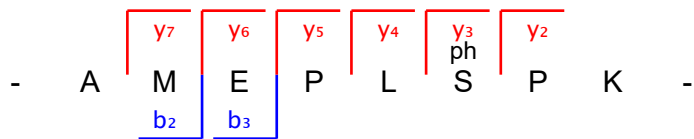



Raw file Scan Method Score m/z  
 sys\_00\_2 9677 FTMS; HCD 137.58 609.27

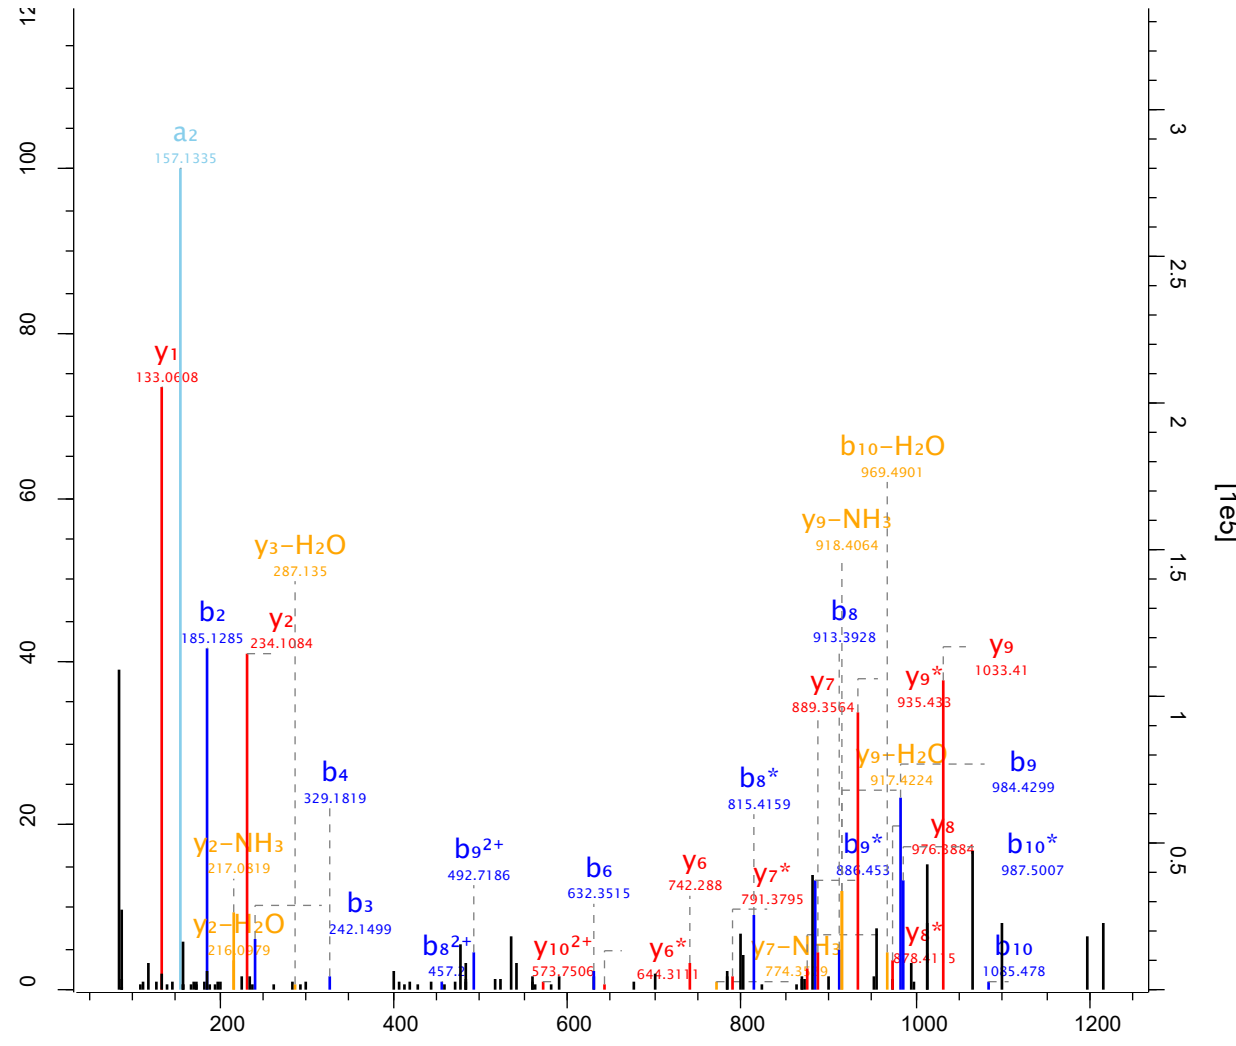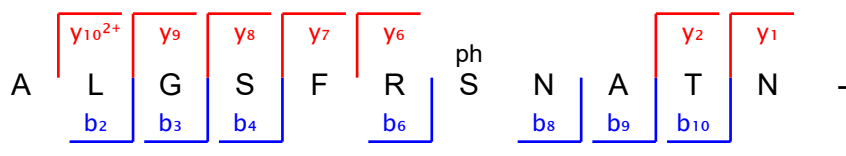

Raw file Scan Method Score m/z  
 sys\_00\_2 9738 FTMS; HCD 94.77 524.22

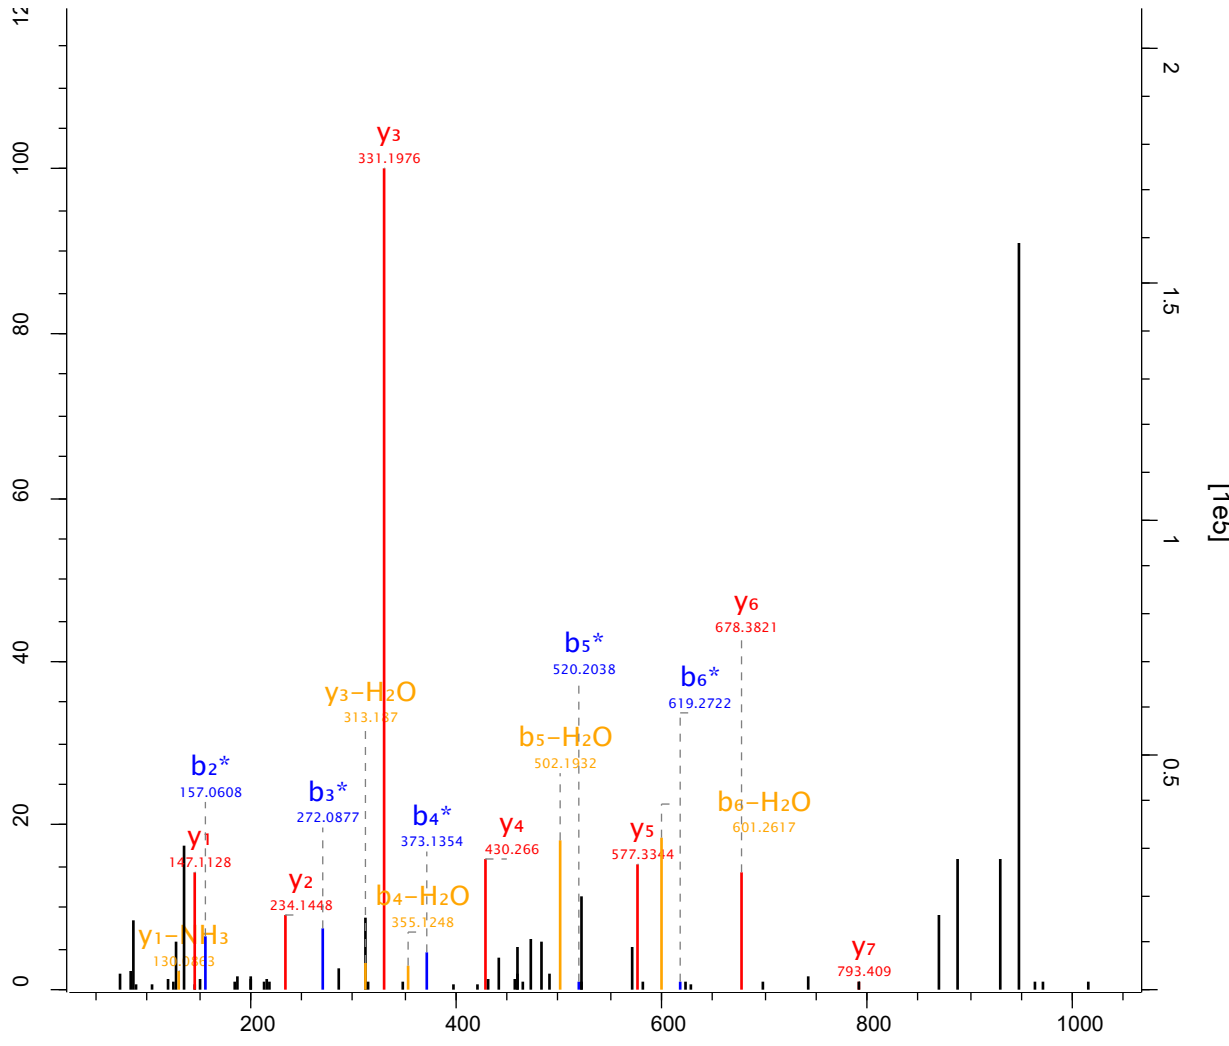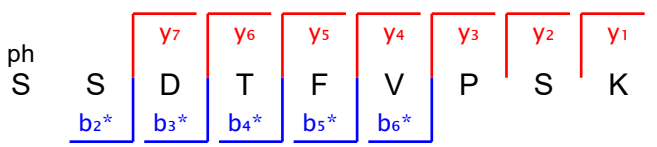

| Raw file | Scan | Method    | Score | m/z    |
|----------|------|-----------|-------|--------|
| sys_00_2 | 9959 | FTMS; HCD | 79.2  | 544.73 |

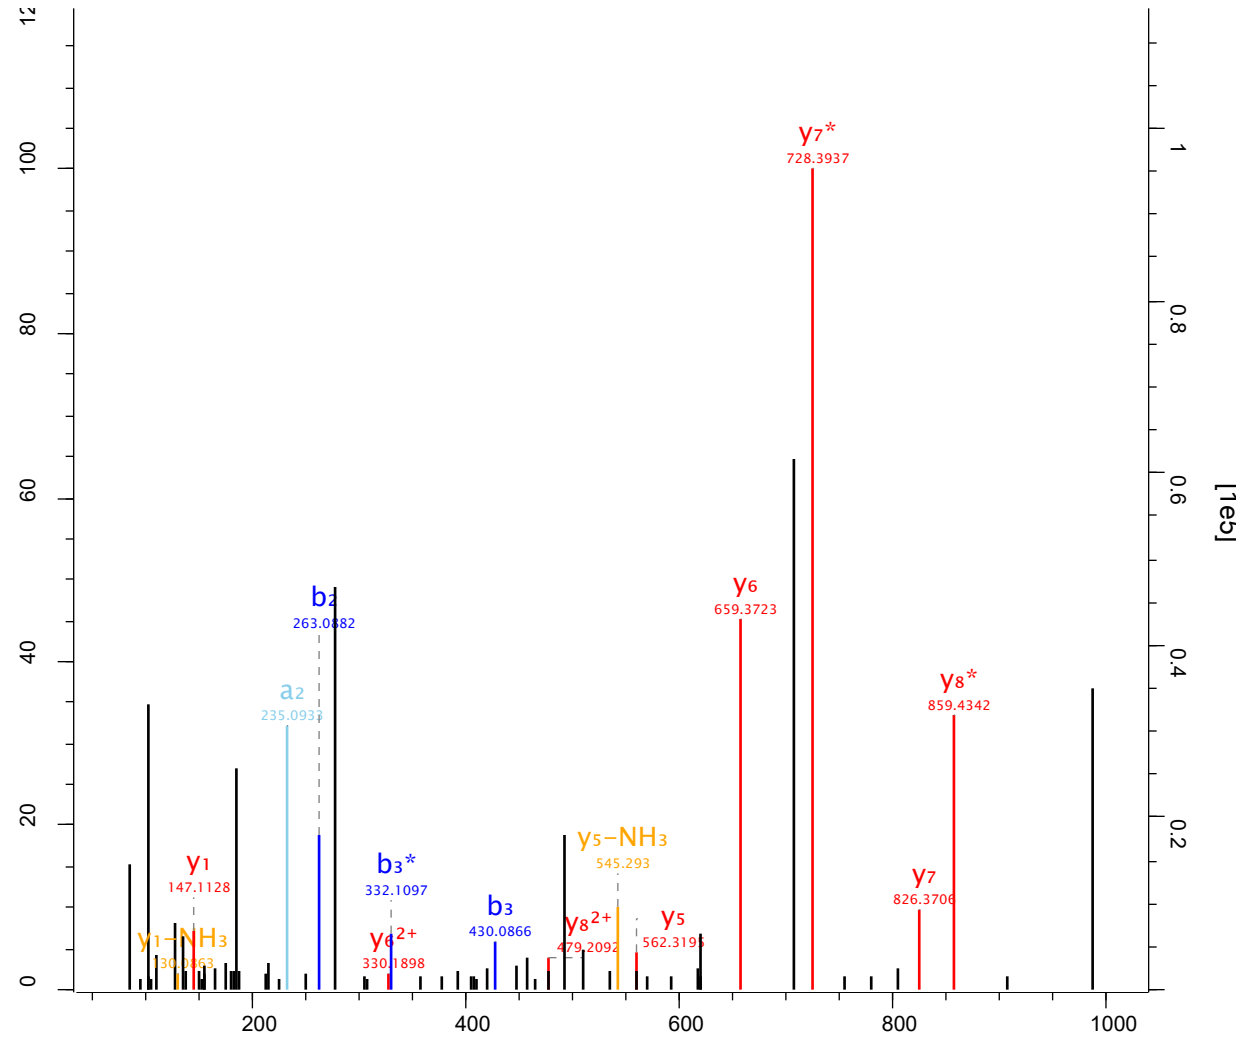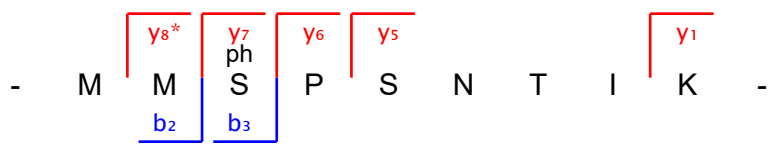

| Raw file      | Scan  | Method    | Score | m/z    |
|---------------|-------|-----------|-------|--------|
| sys_00_3short | 10195 | FTMS; HCD | 66.27 | 511.26 |

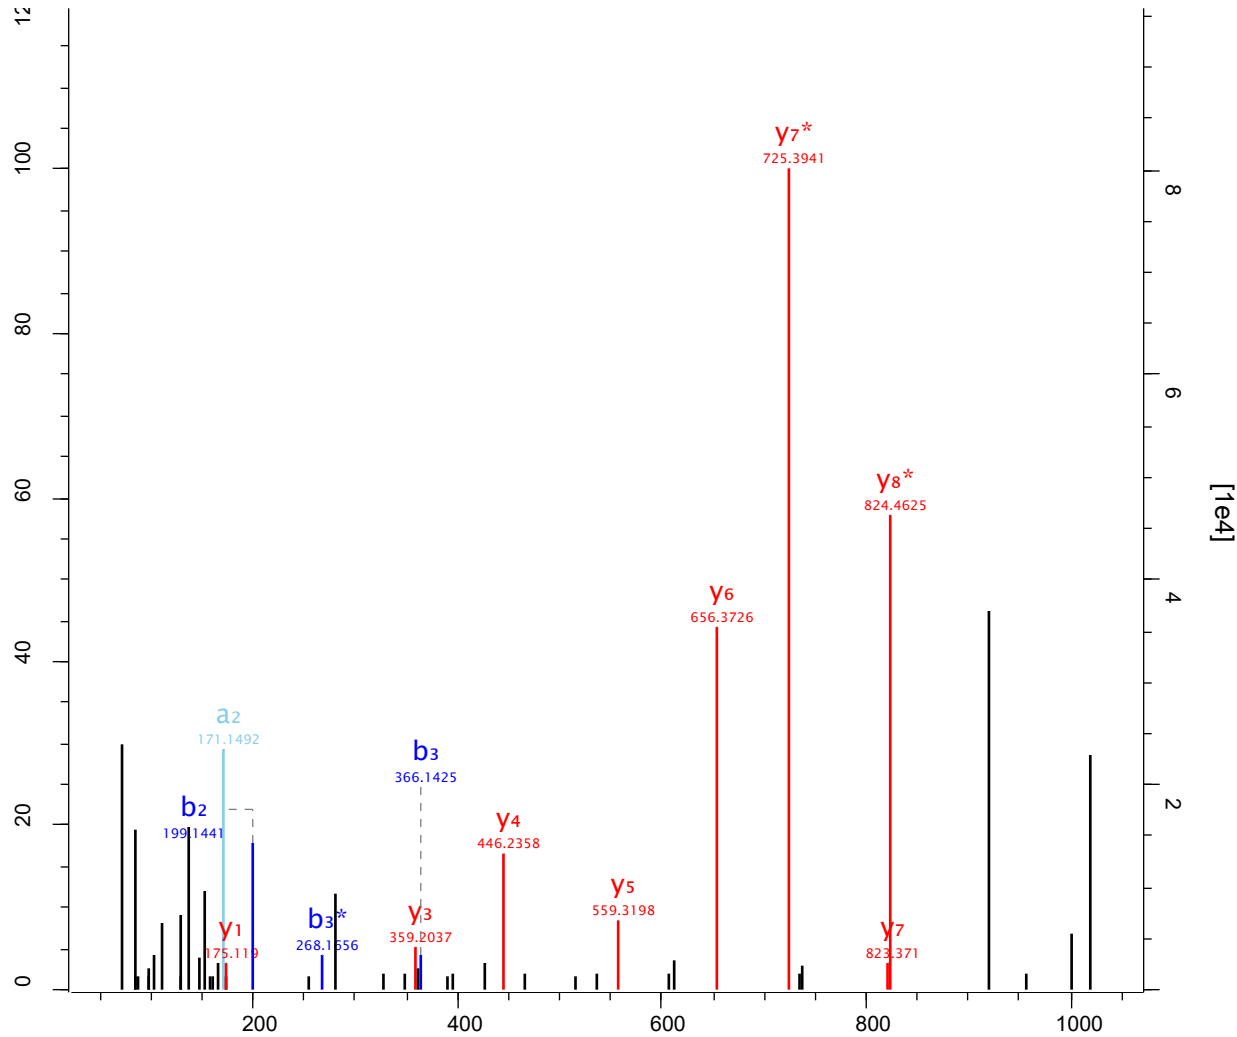

- V V V S P L S S P R -

Annotations: **y8\***, **y7**, **y6**, **y5**, **y4**, **y3**, **y1** (red boxes); **b2**, **b3** (blue boxes); **ph** (black text).

Raw file Scan Method Score m/z  
 sys\_00\_3short 10211 FTMS; HCD 84.05 495.75

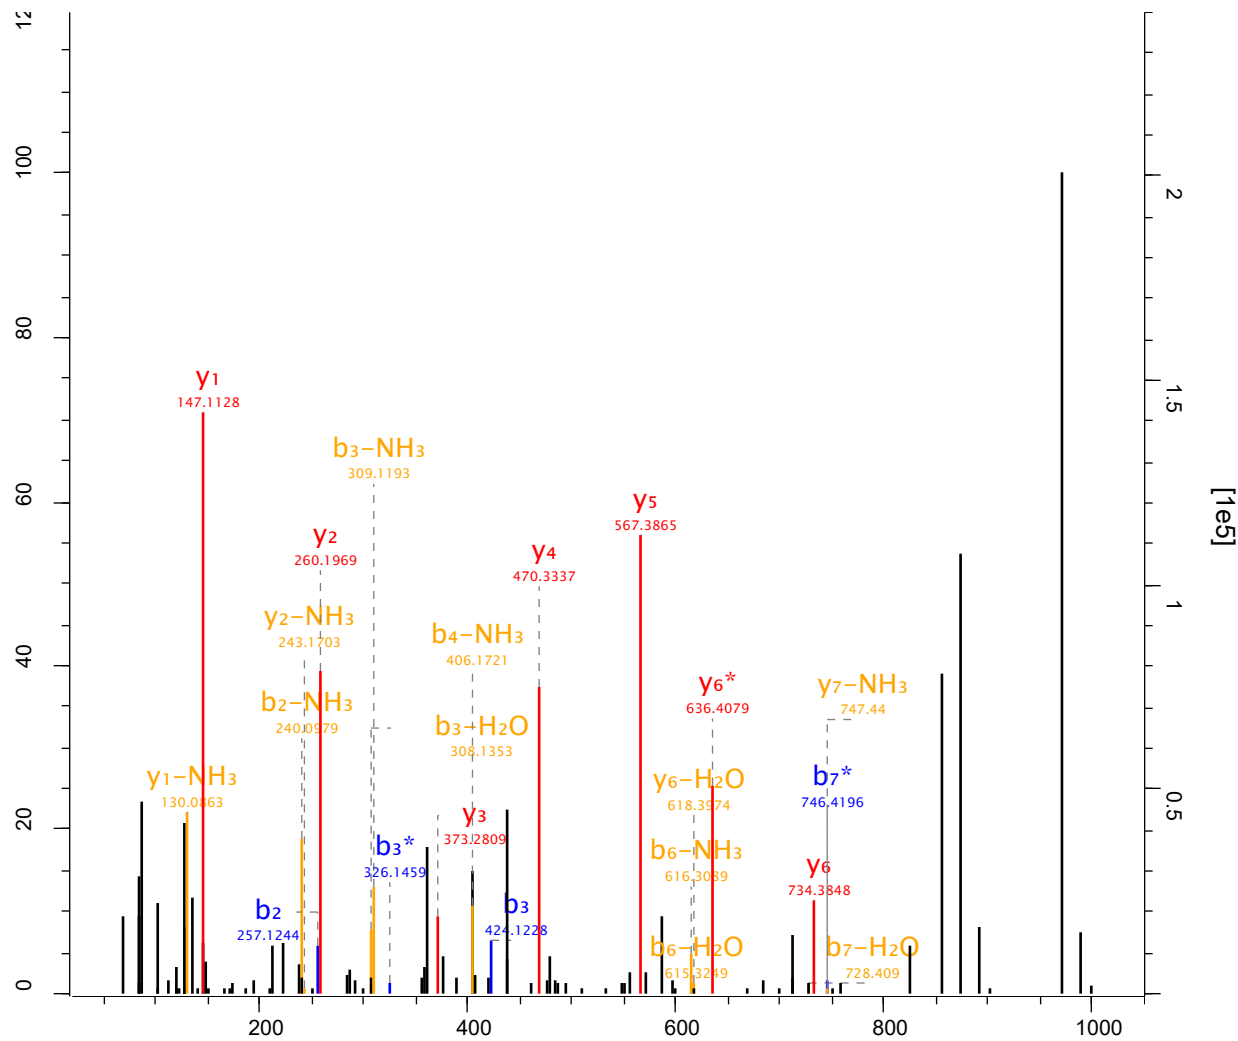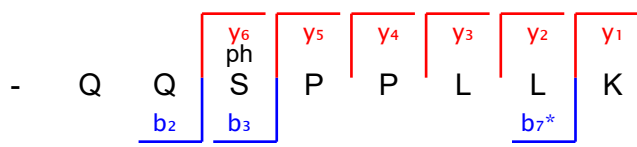

Raw file Scan Method Score m/z  
 sys\_00\_3short 10304 FTMS; HCD 55.01 714.8

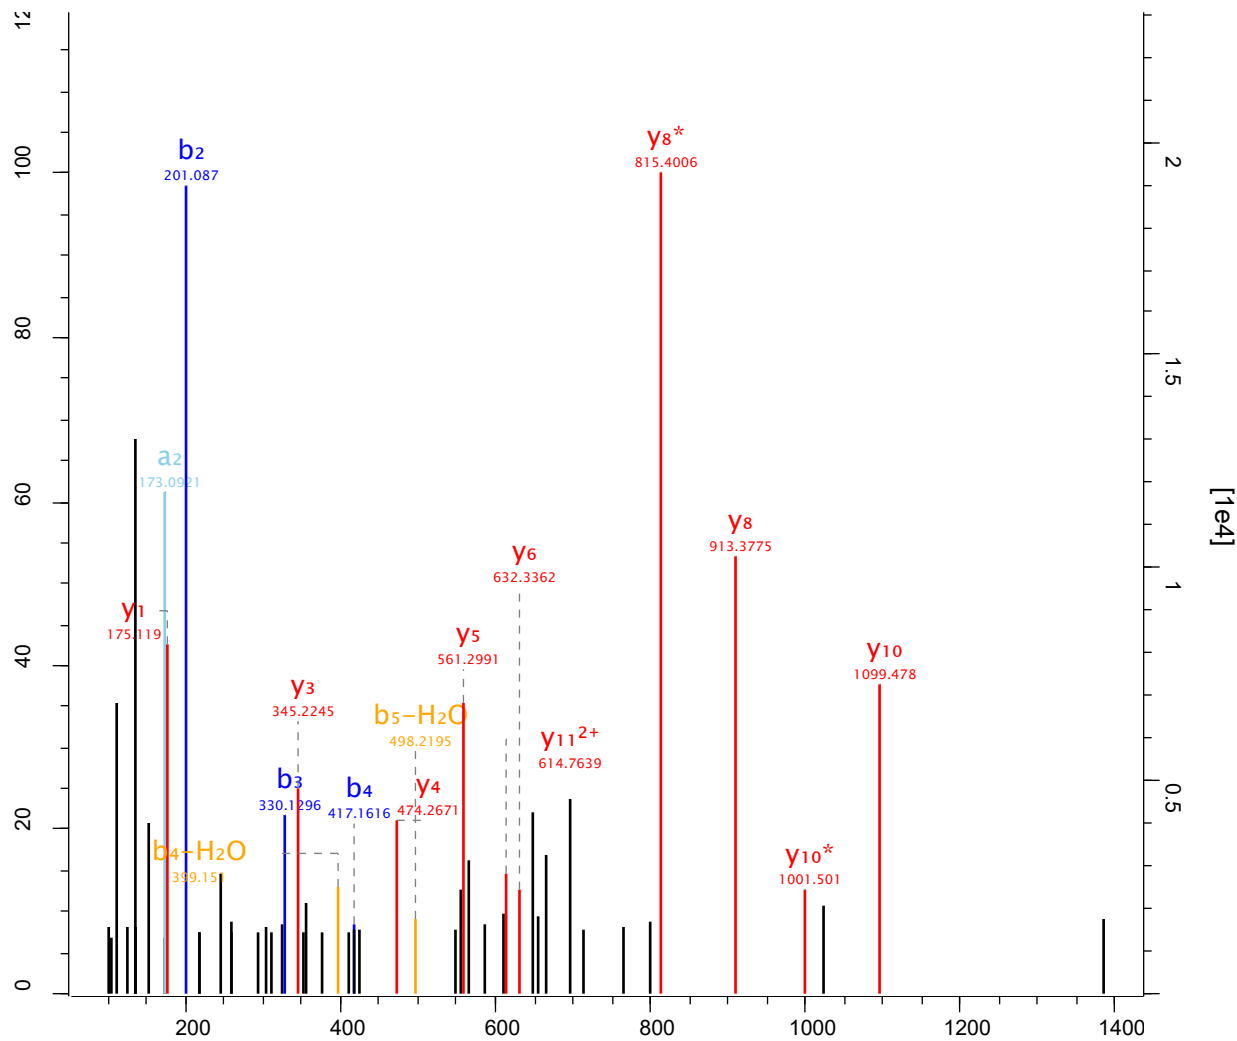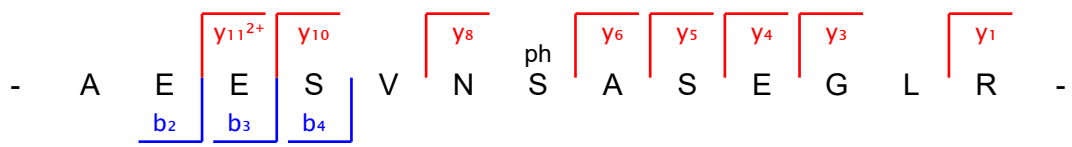

Raw file Scan Method Score m/z  
 sys\_00\_3short 10520 FTMS; HCD 62.47 478.71

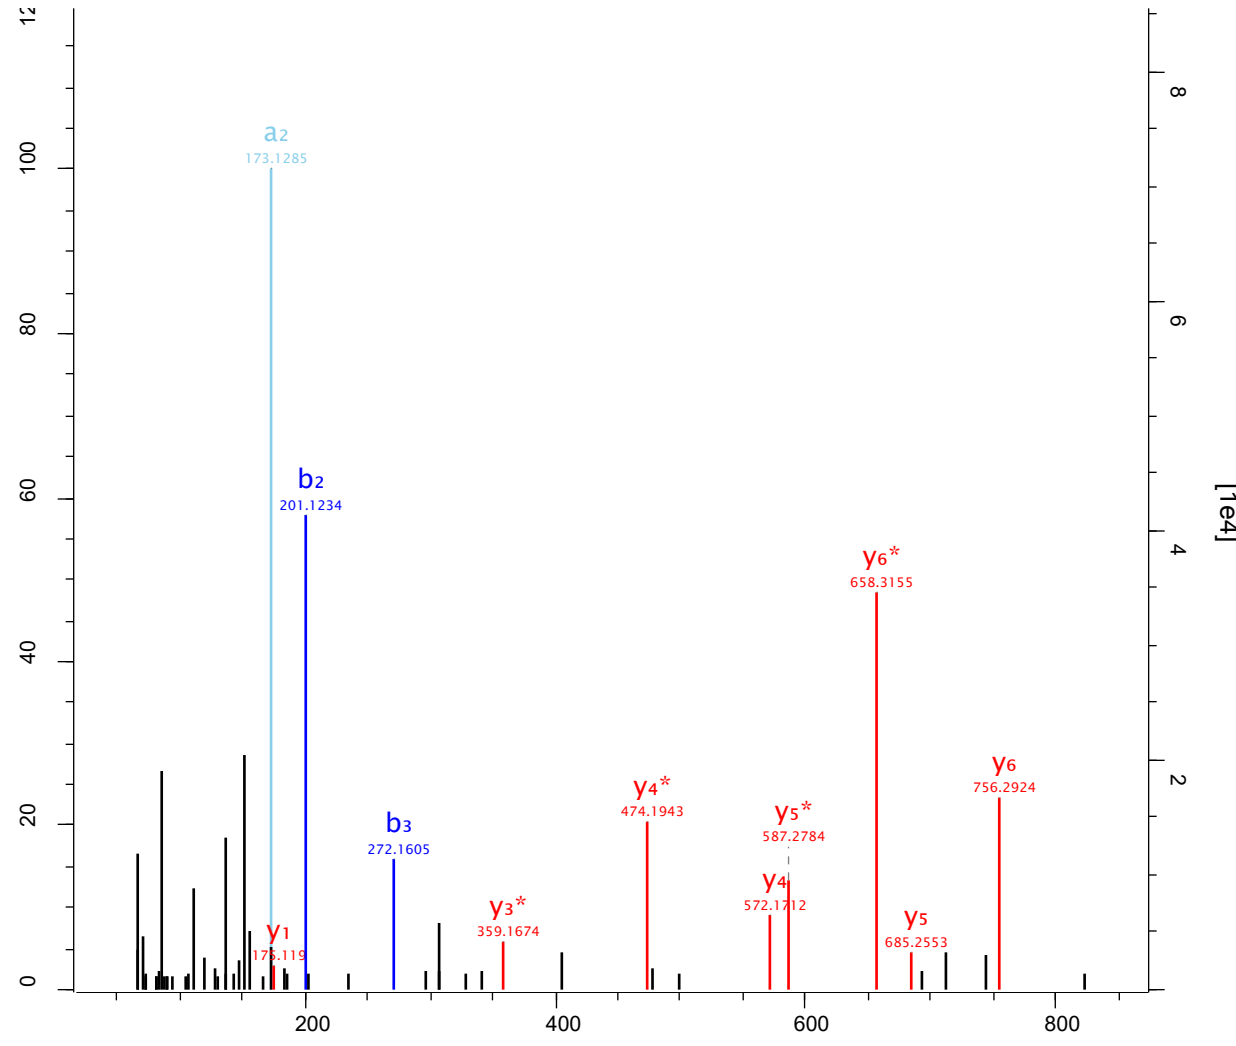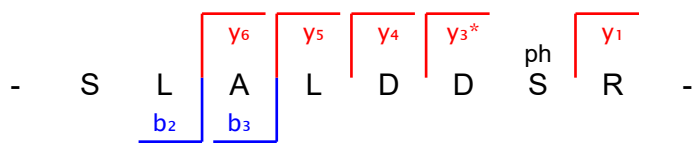

Raw file Scan Method Score m/z  
 sys\_00\_3short 10603 FTMS; HCD 53.26 712.33

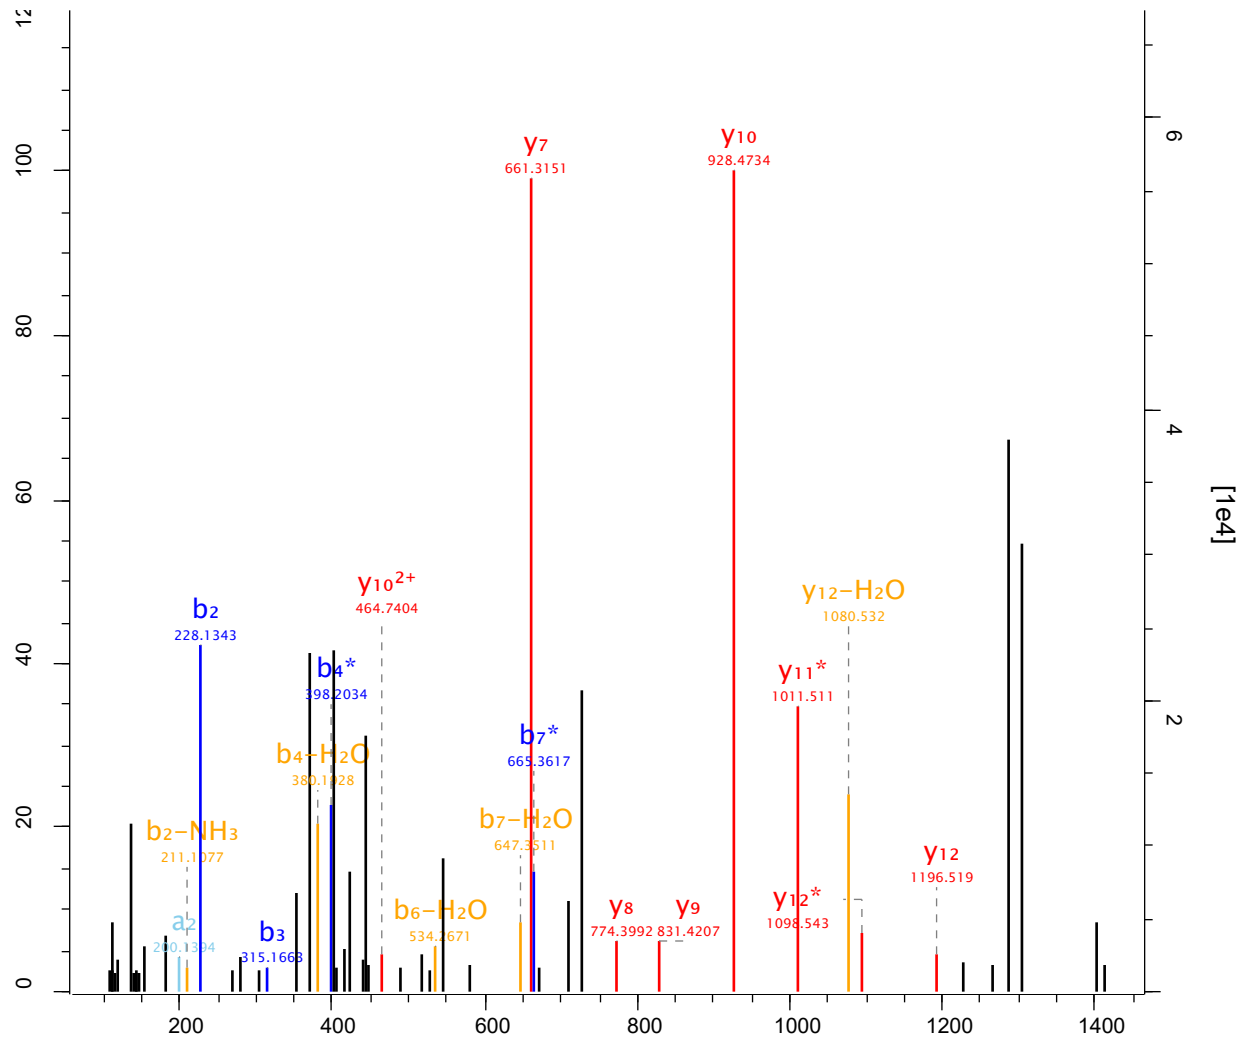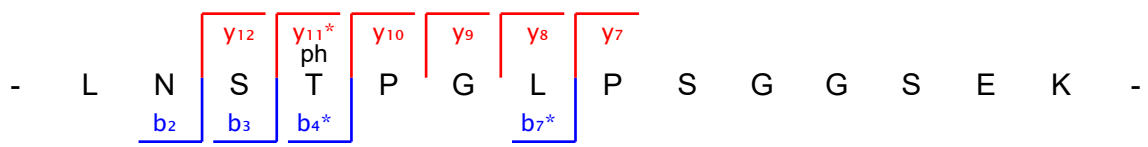



| Raw file      | Scan  | Method    | Score | m/z    |
|---------------|-------|-----------|-------|--------|
| sys_00_3short | 10989 | FTMS; HCD | 58.08 | 698.82 |

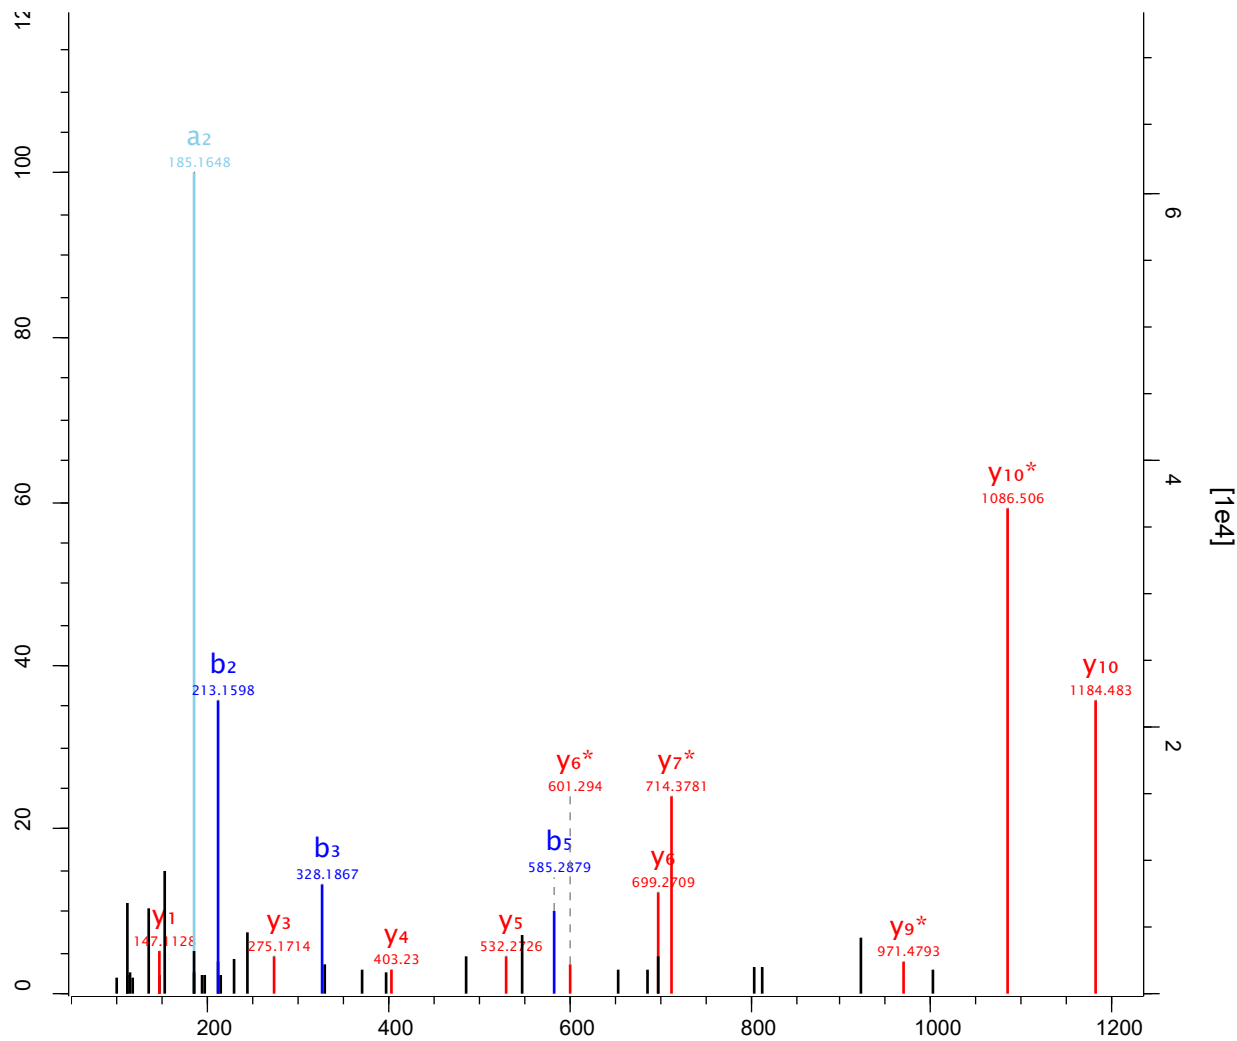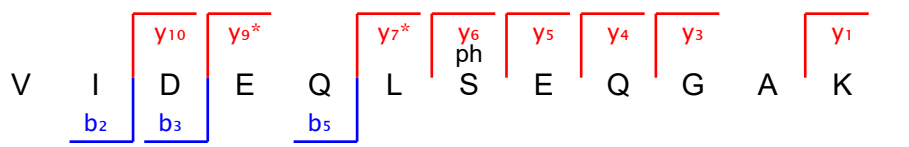

Raw file Scan Method Score m/z  
 sys\_00\_3short 11016 FTMS; HCD 147.7 662.31

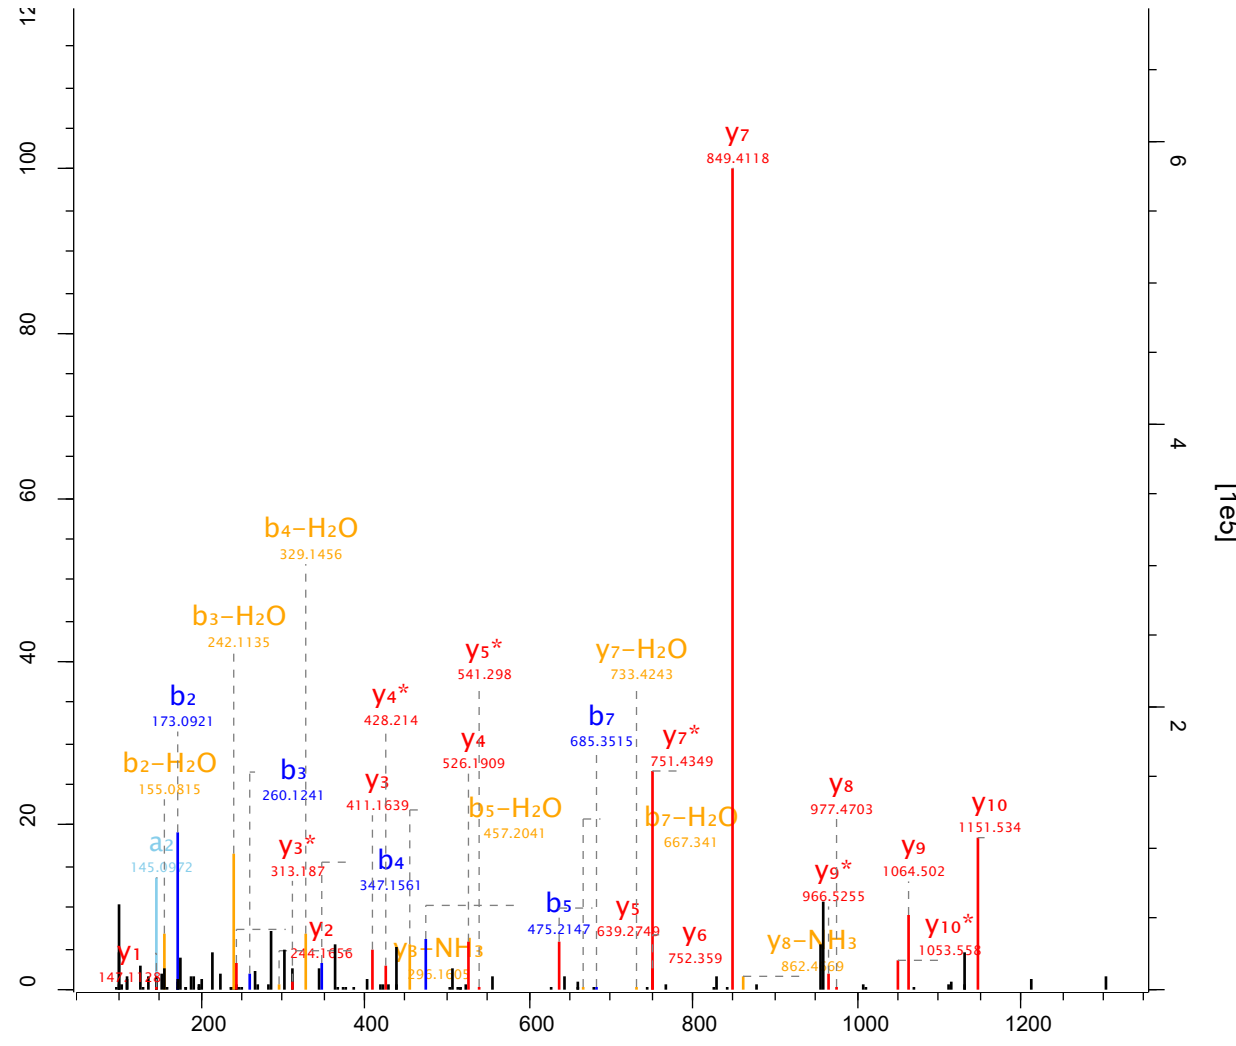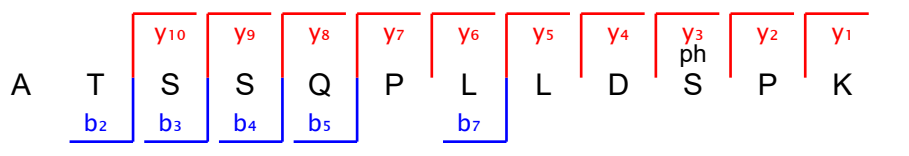

| Raw file      | Scan  | Method    | Score | m/z   |
|---------------|-------|-----------|-------|-------|
| sys_00_3short | 11136 | FTMS; HCD | 42.34 | 433.7 |

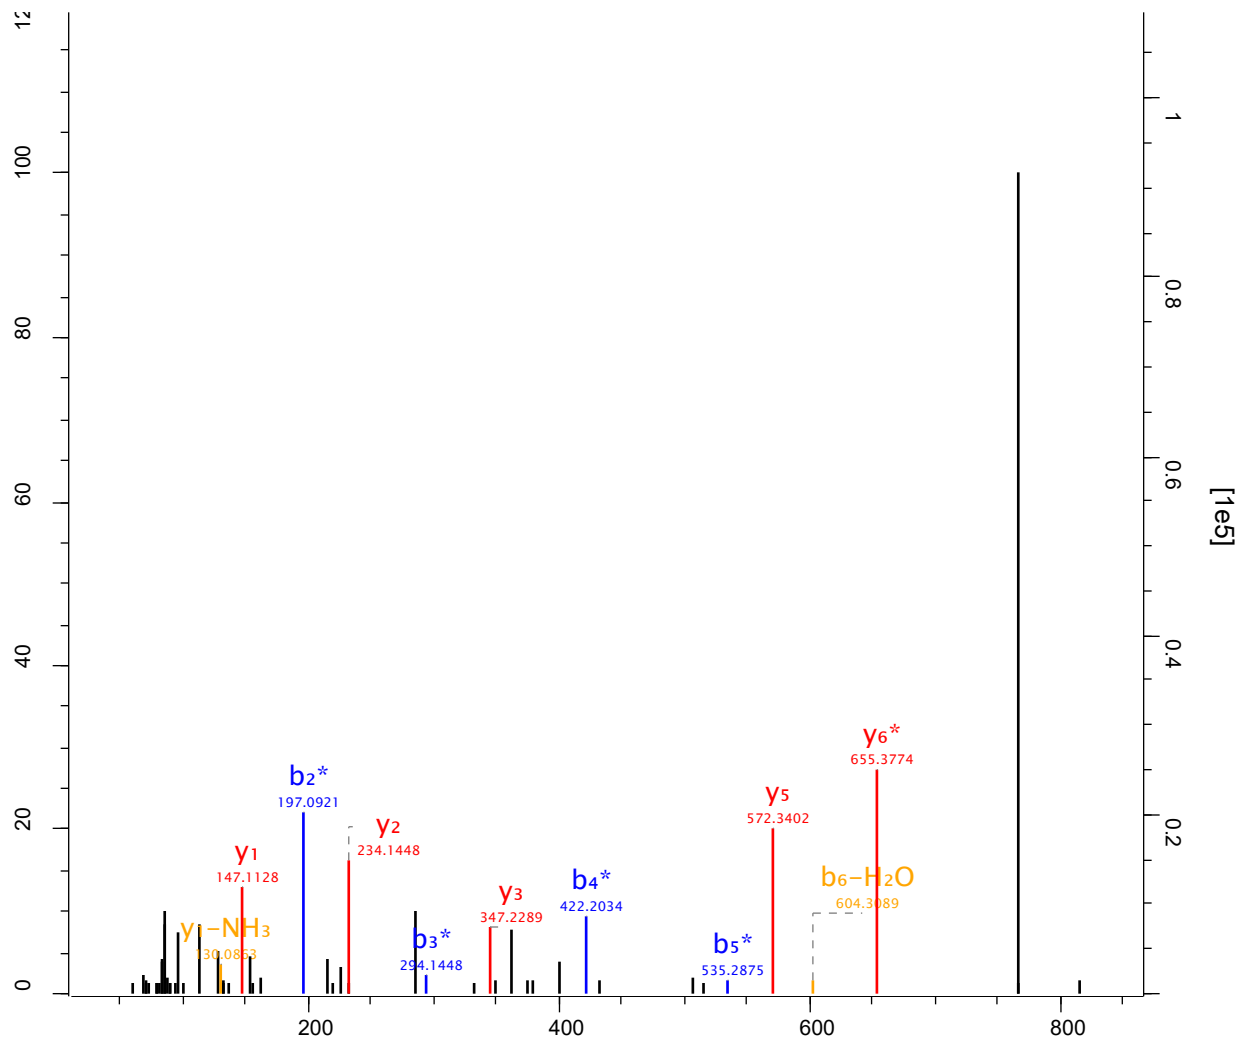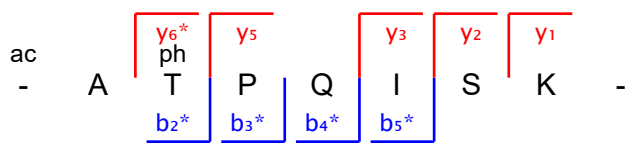

Raw file Scan Method Score m/z  
 sys\_00\_3short 11182 FTMS; HCD 95.42 510.72

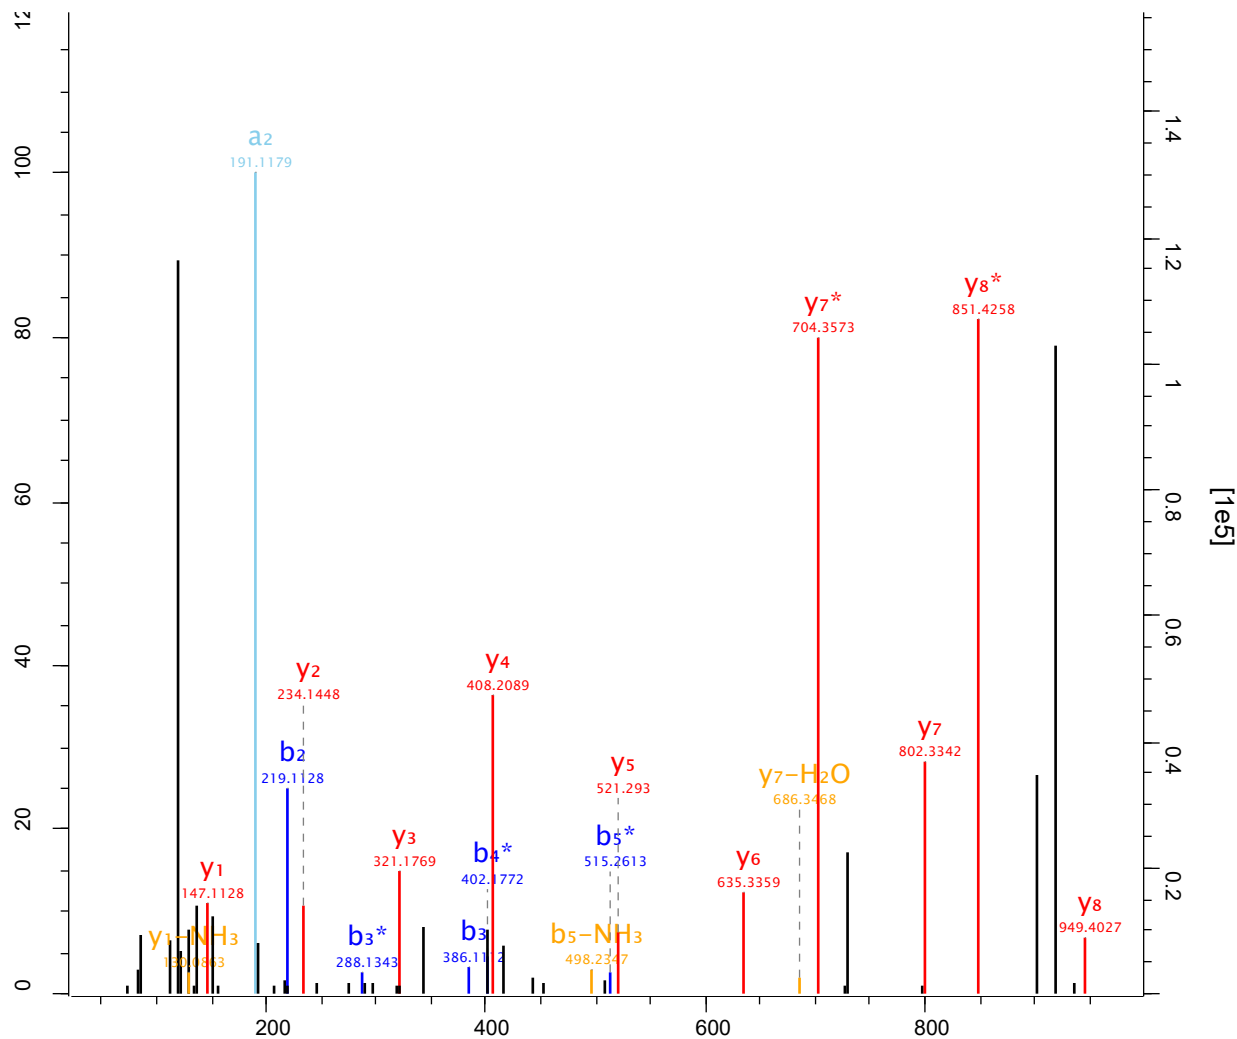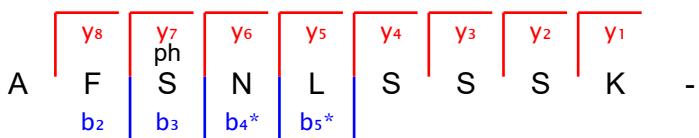

Raw file Scan Method Score m/z  
 sys\_00\_3short 11403 FTMS; HCD 125.97 452.71

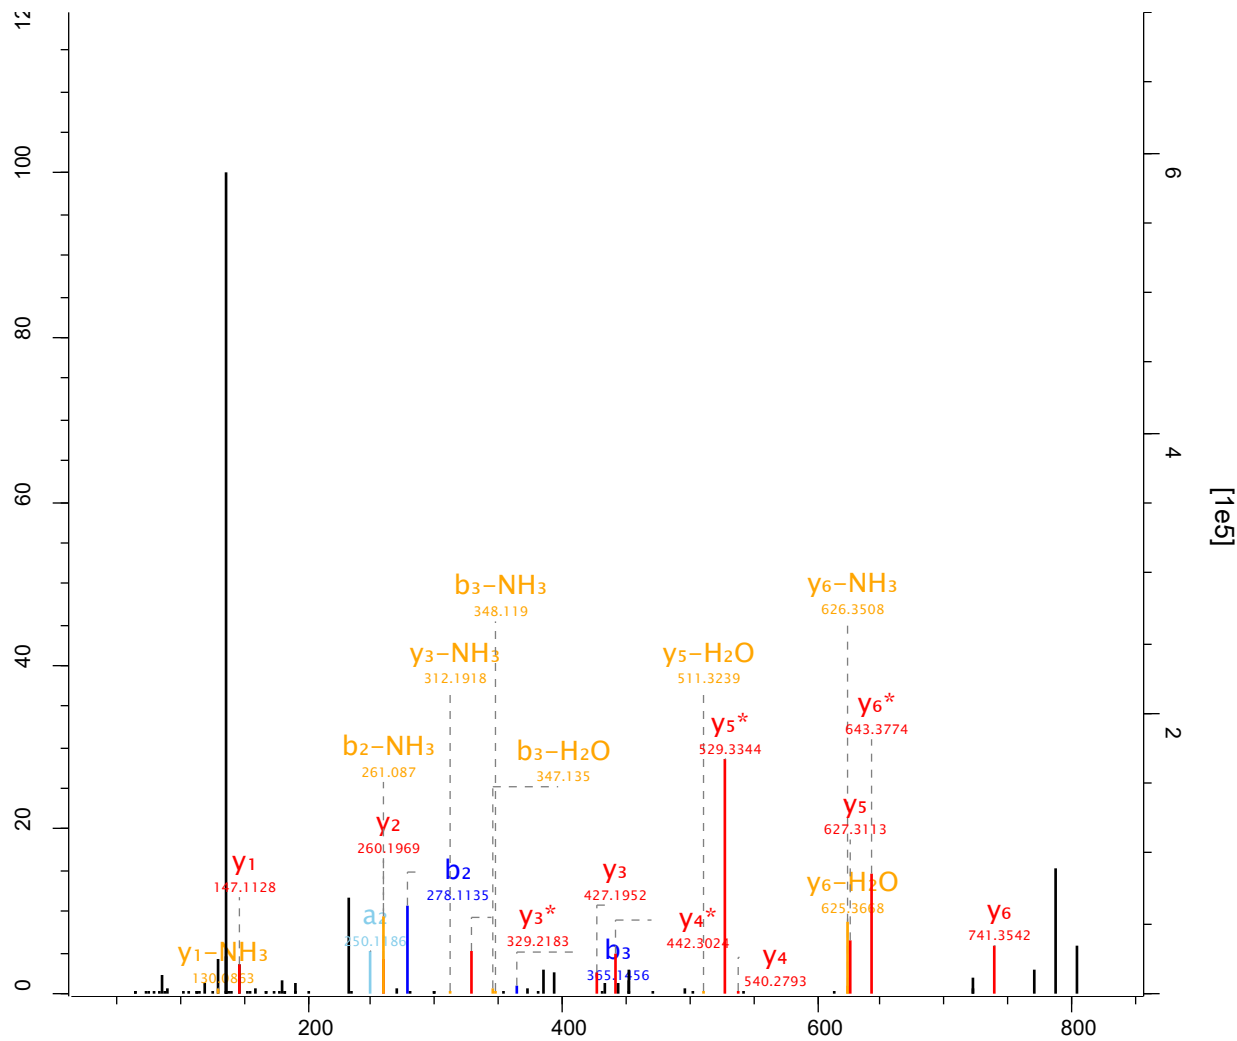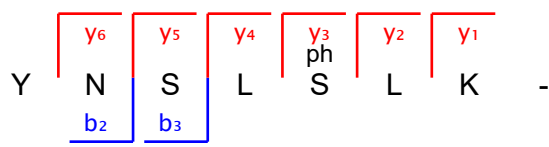

| Raw file      | Scan  | Method    | Score | m/z    |
|---------------|-------|-----------|-------|--------|
| sys_00_3short | 11629 | FTMS; HCD | 52.58 | 630.73 |

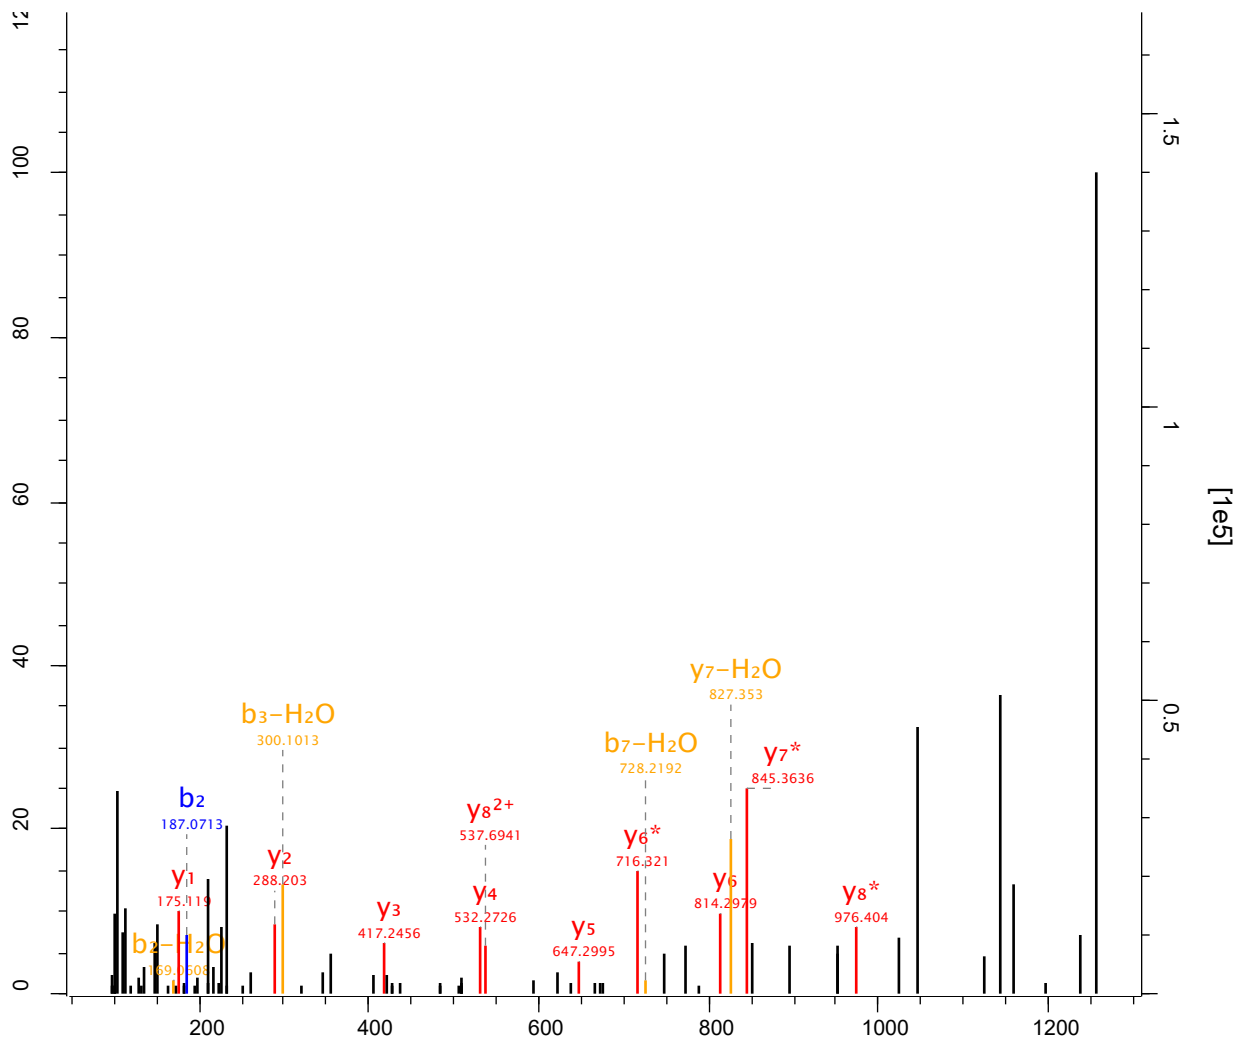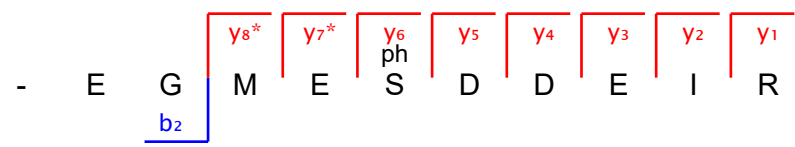

Raw file Scan Method Score m/z  
 sys\_00\_3short 12013 FTMS; HCD 116.24 568.23

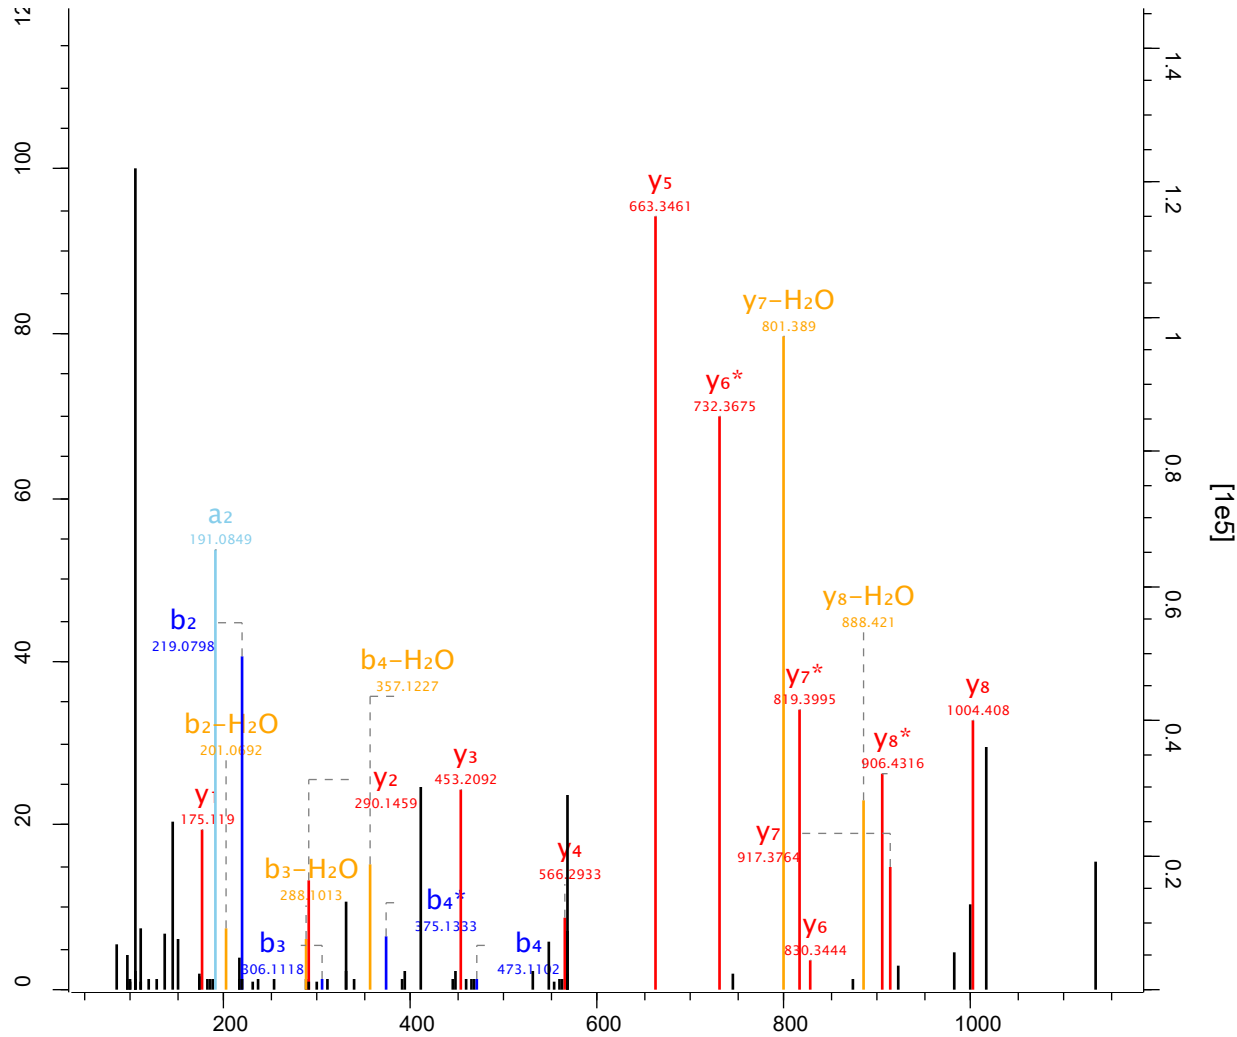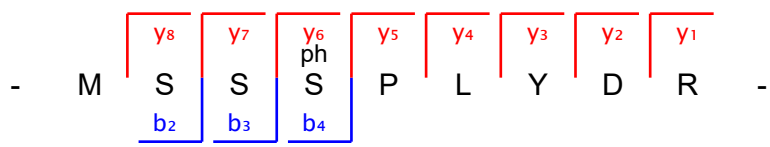

Raw file Scan Method Score m/z  
 sys\_00\_3short 12110 FTMS; HCD 136.39 686.31

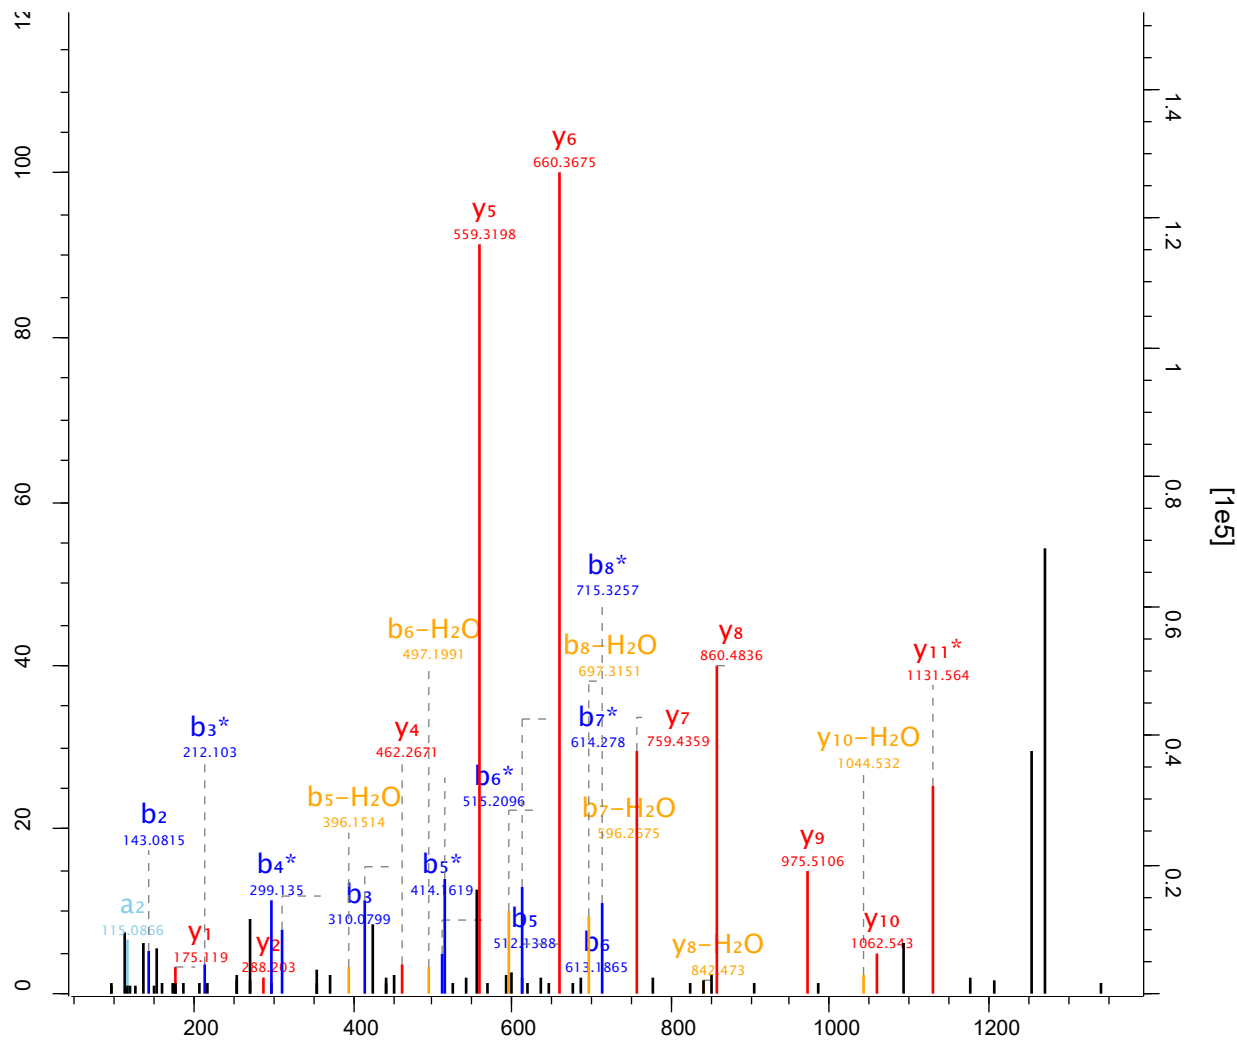

- A A y11\* ph S y10 y9 y8 y7 y6 y5 y4 S y2 y1 -

b2 b3 b4\* b5 b6 b7\* b8\* P S S L R -



Raw file Scan Method Score m/z  
 sys\_00\_3short 12113 FTMS; HCD 146.16 515.24

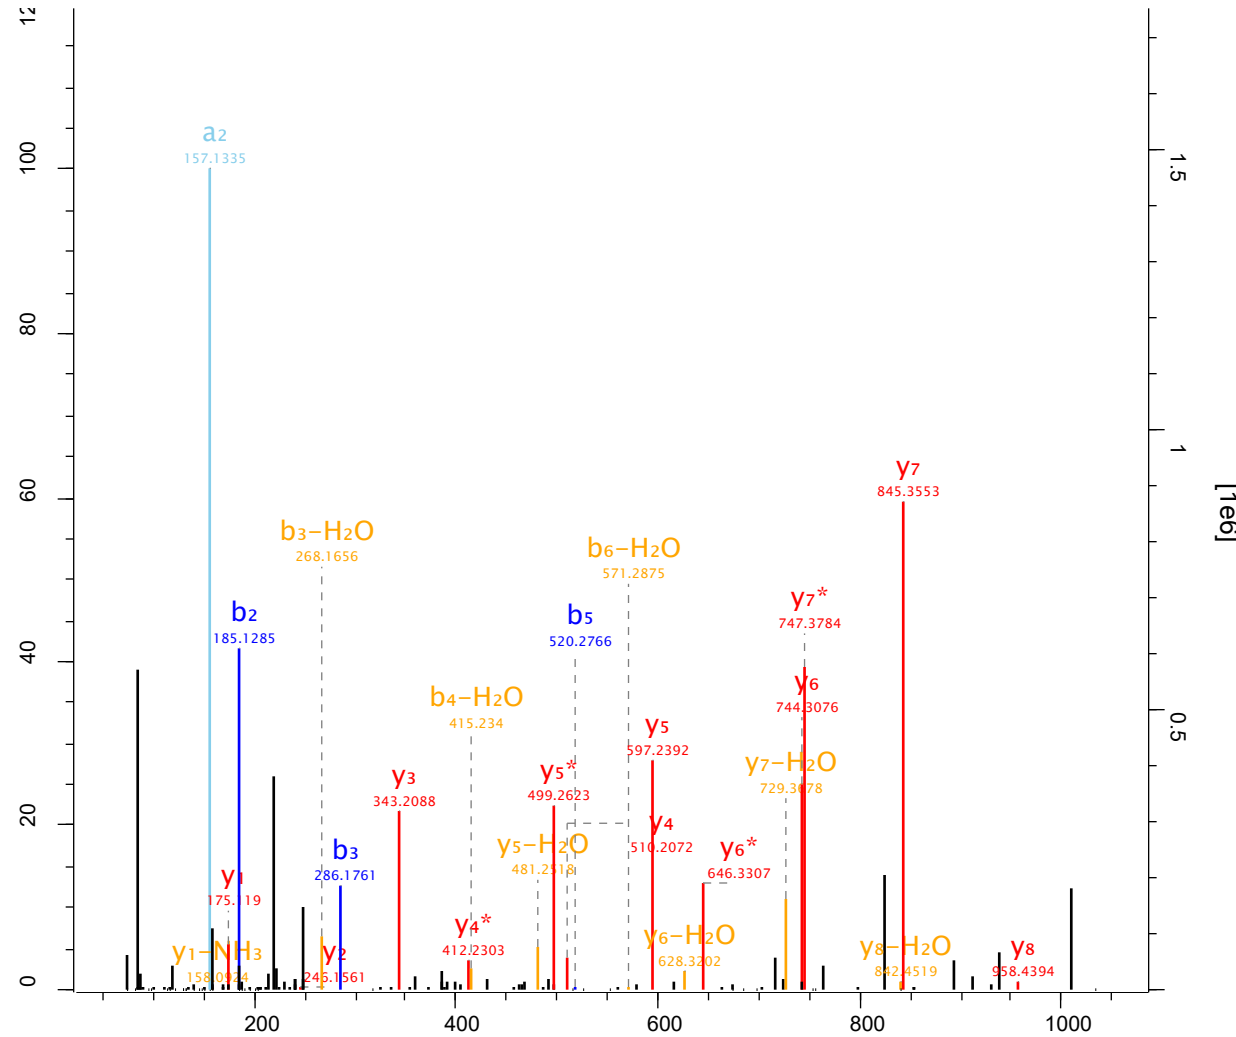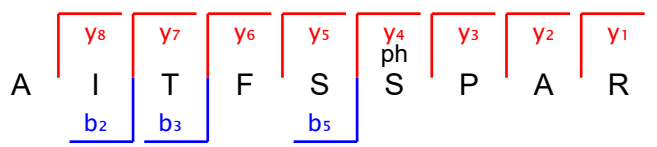

Raw file Scan Method Score m/z  
 sys\_00\_3short 12650 FTMS; HCD 148.62 445.19

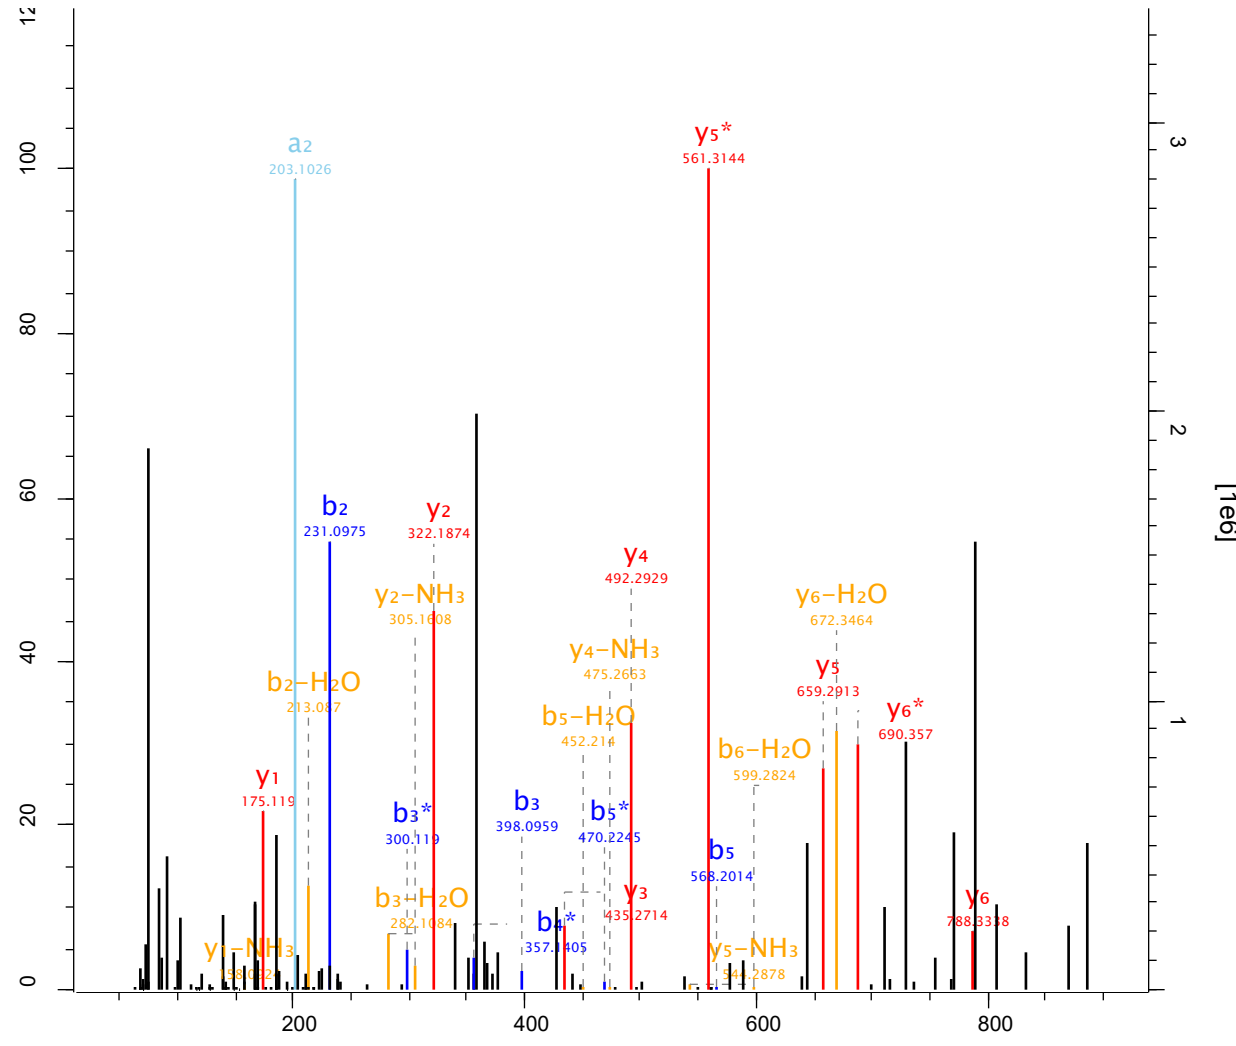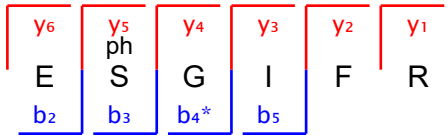

Raw file Scan Method Score m/z  
 sys\_00\_3short 12797 FTMS; HCD 178.51 598.28

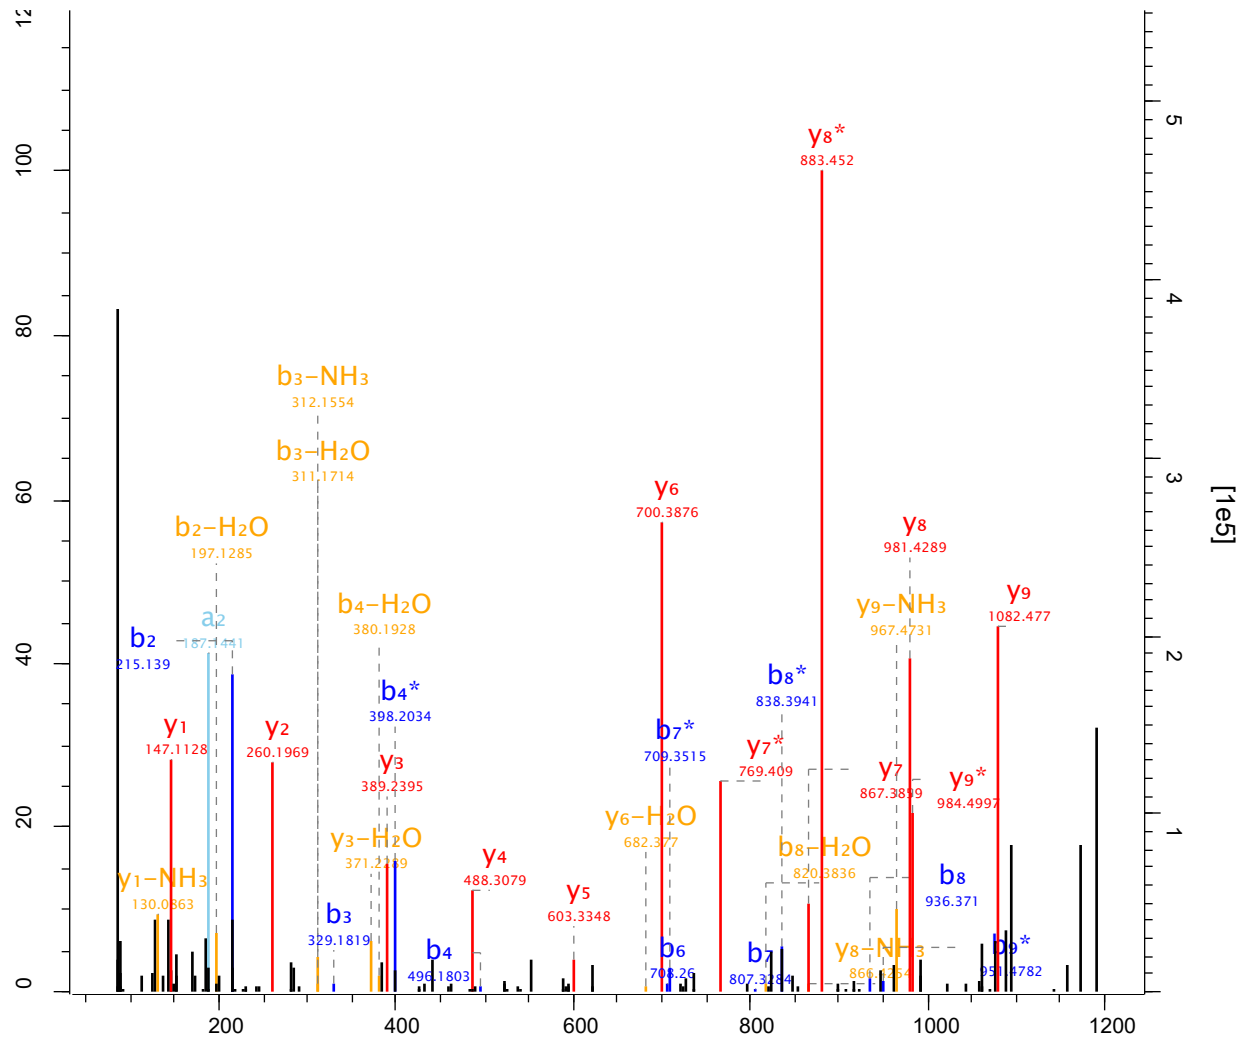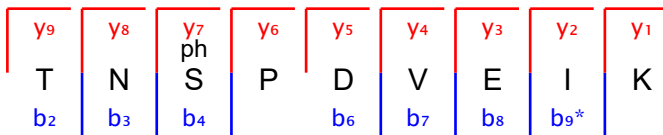

Raw file Scan Method Score m/z  
 sys\_00\_3short 12943 FTMS; HCD 123.75 562.75

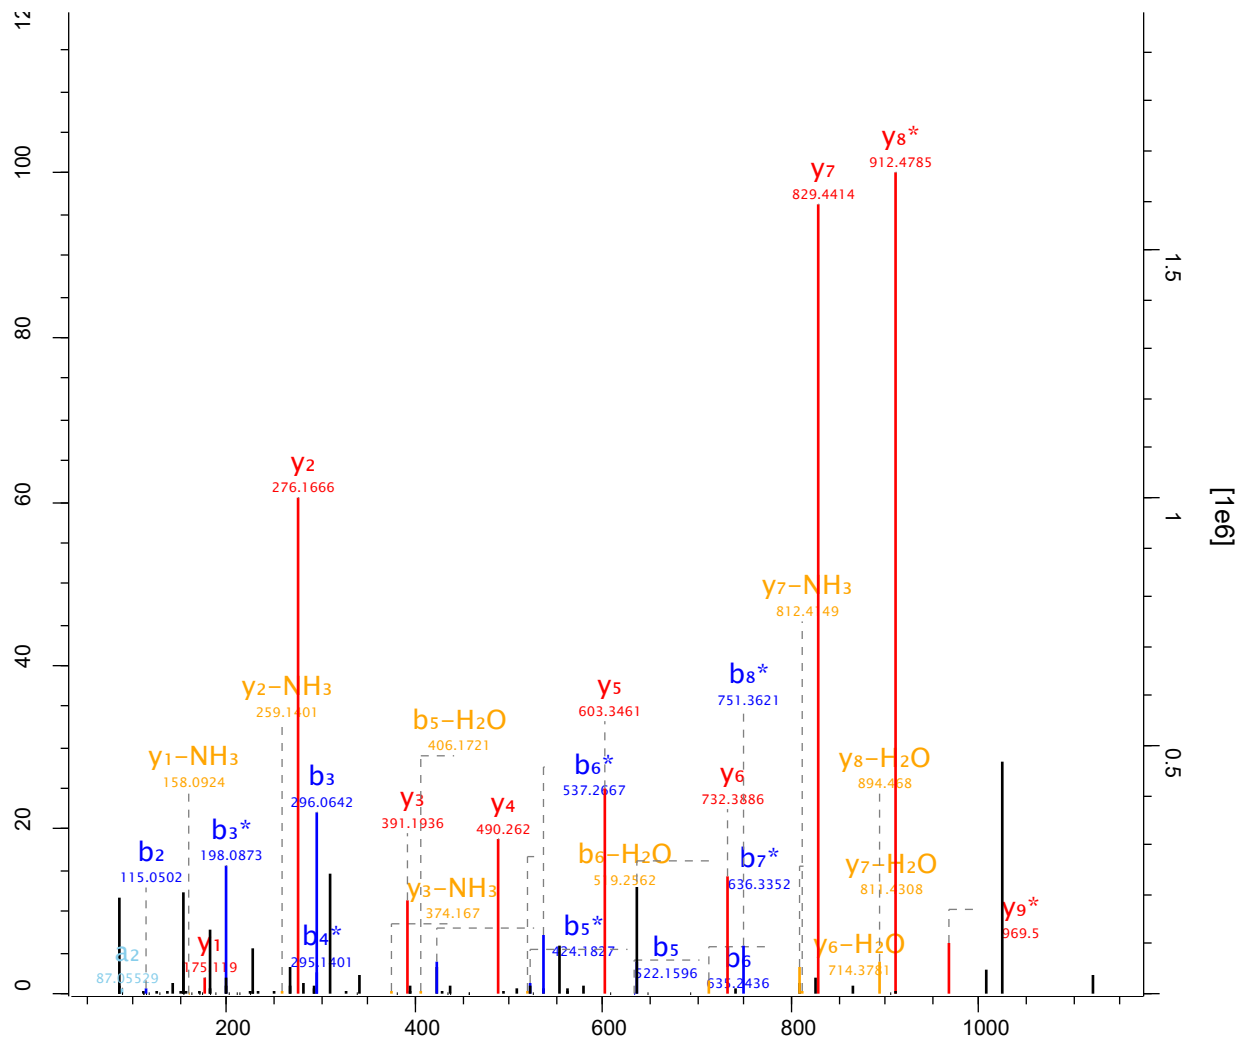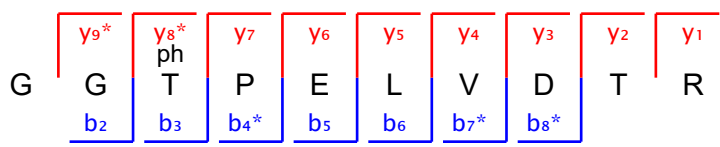

Raw file Scan Method Score m/z  
 sys\_00\_3short 12999 FTMS; HCD 111.63 524.23

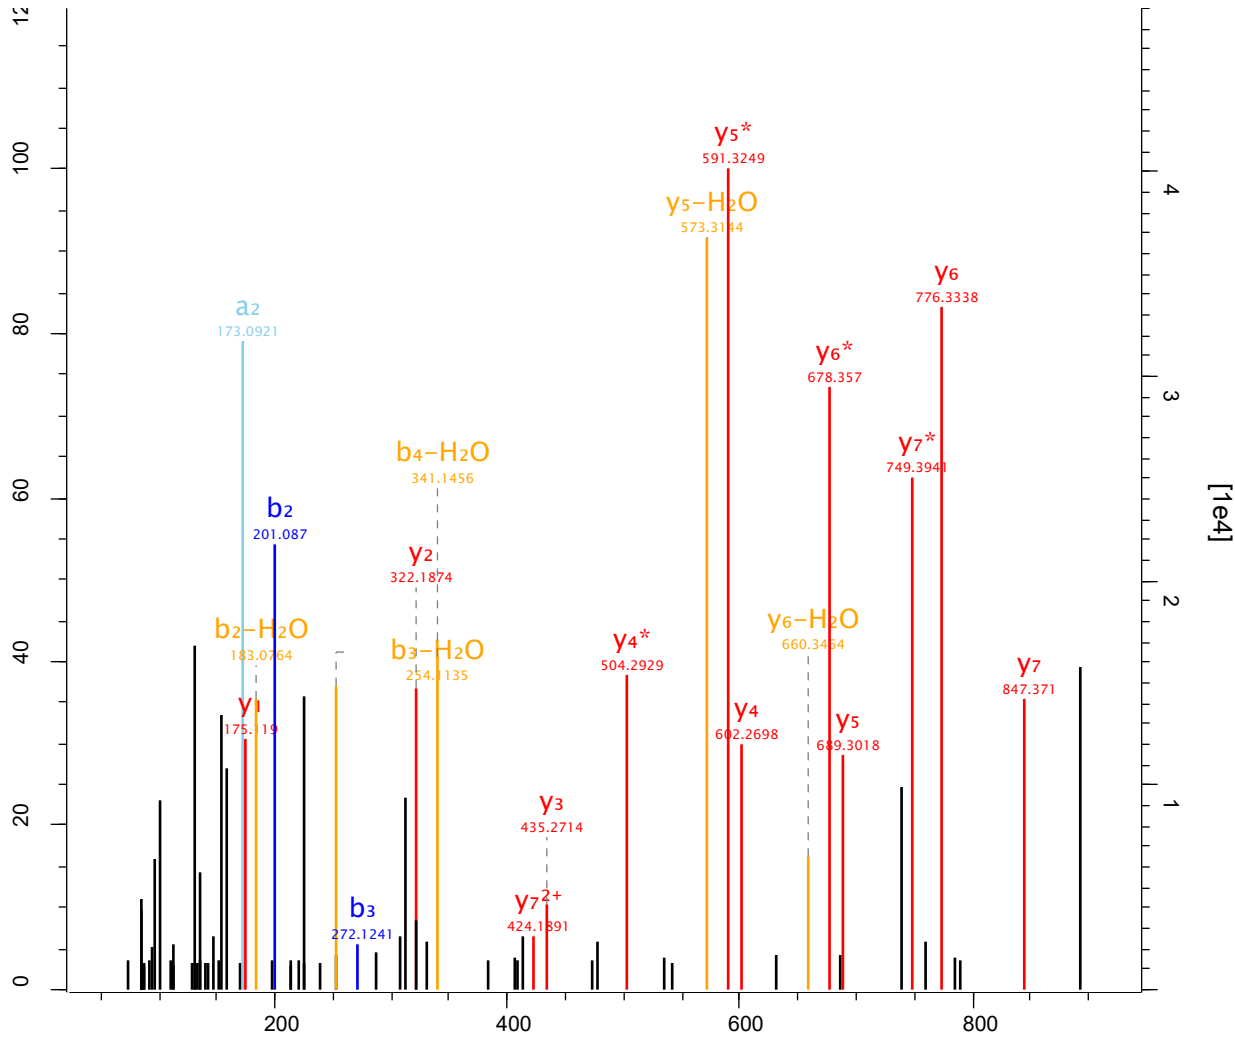

- E A A S S S I F R -  
 b2 b3 y7 y6 y5 y4 ph y3 y2 y1

Raw file Scan Method Score m/z  
 sys\_00\_3short 13034 FTMS; HCD 51.73 560.23

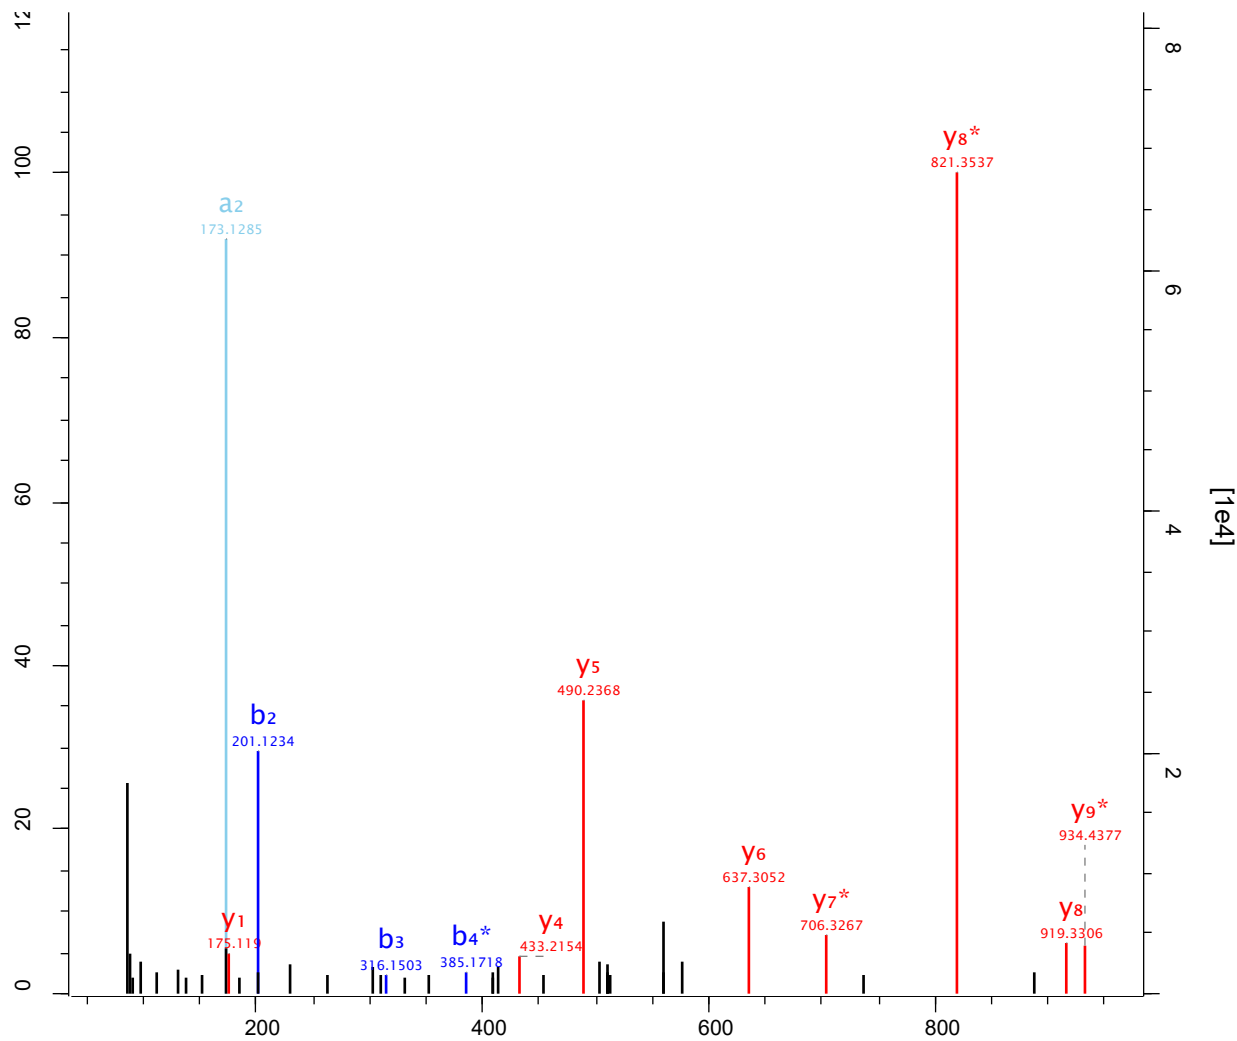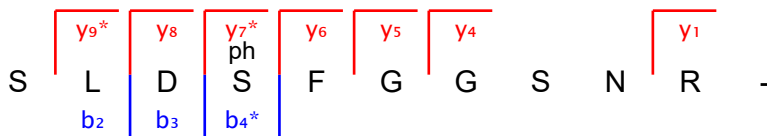

Raw file Scan Method Score m/z  
 sys\_00\_3short 13244 FTMS; HCD 55.26 542.25

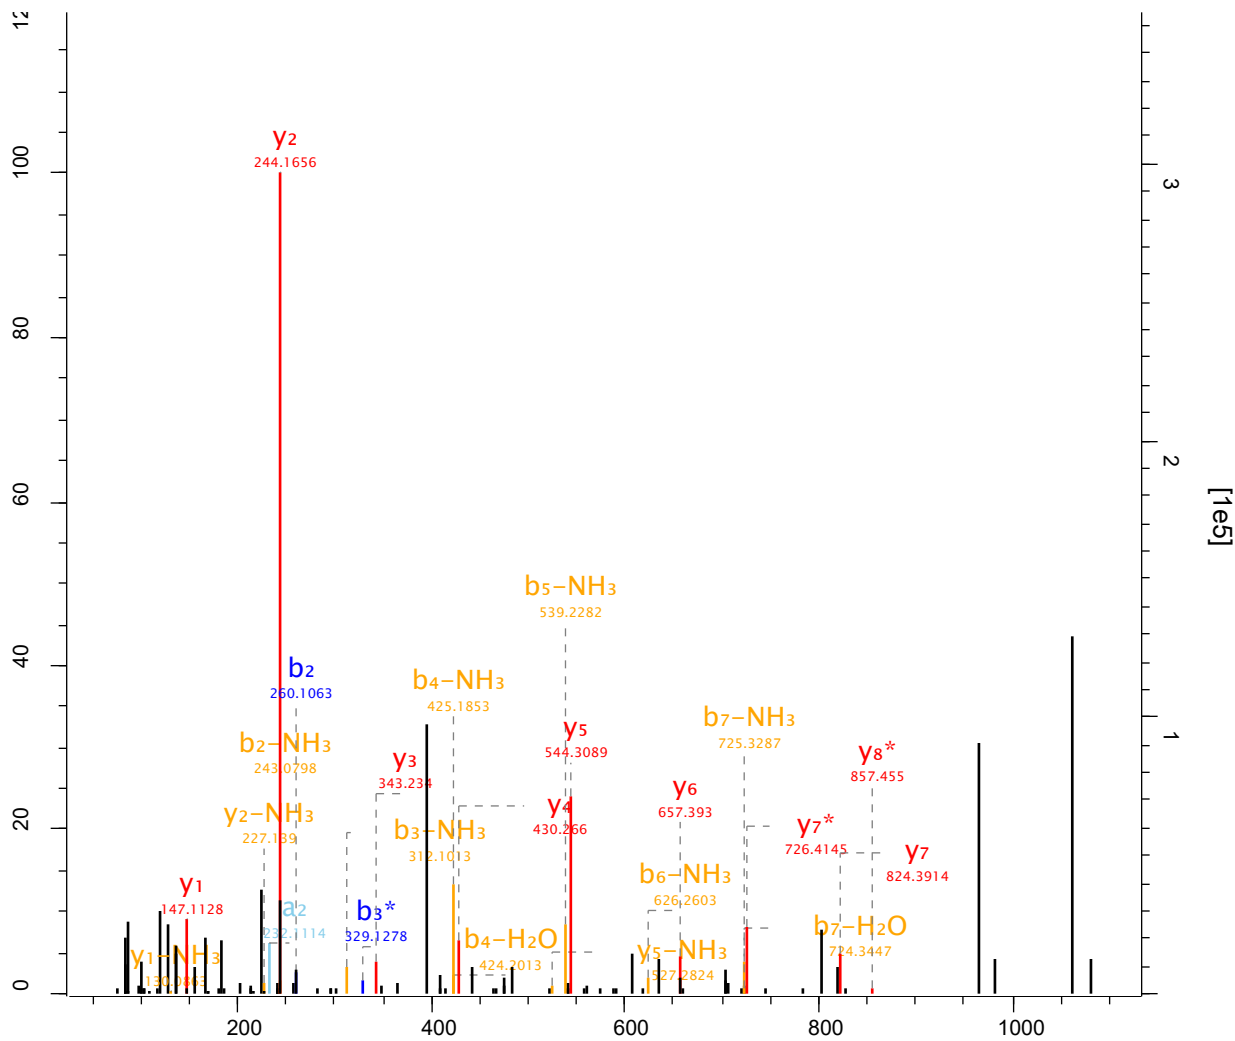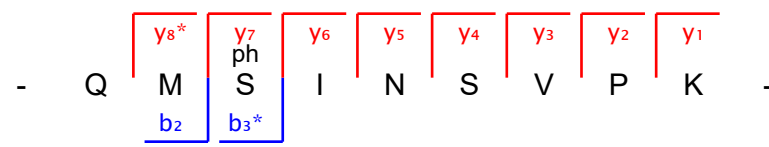

Raw file Scan Method Score m/z  
 sys\_00\_3short 13707 FTMS; HCD 61.24 564.27

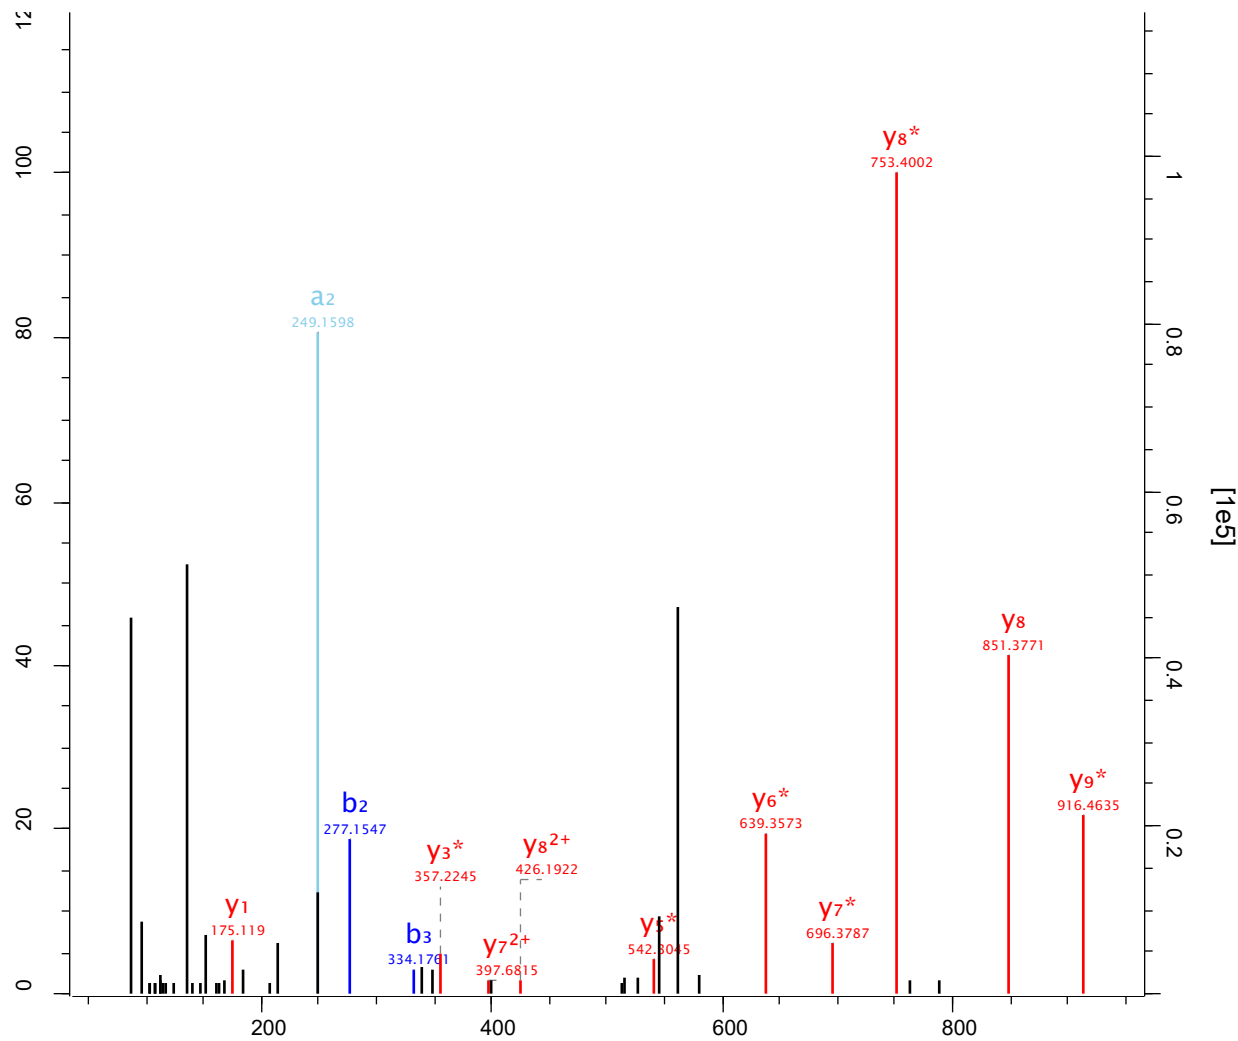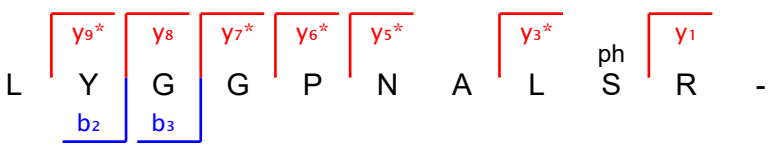



Raw file Scan Method Score m/z  
 sys\_00\_3short 13717 FTMS; HCD 148.78 550.76

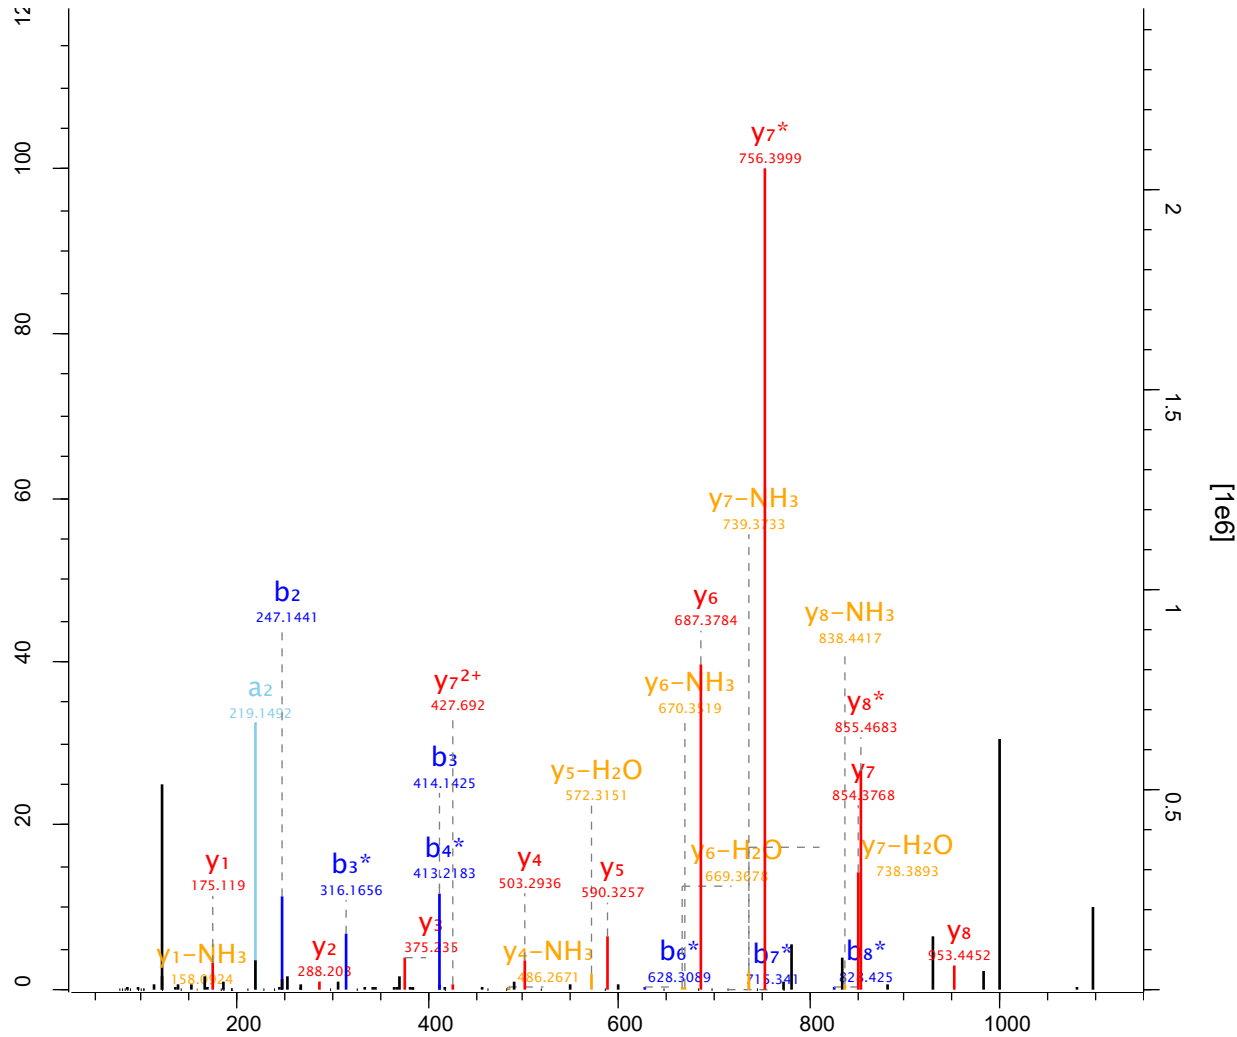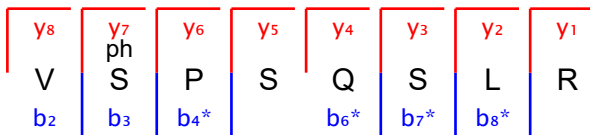

Raw file Scan Method Score m/z  
 sys\_00\_3short 13838 FTMS; HCD 67.52 541.75

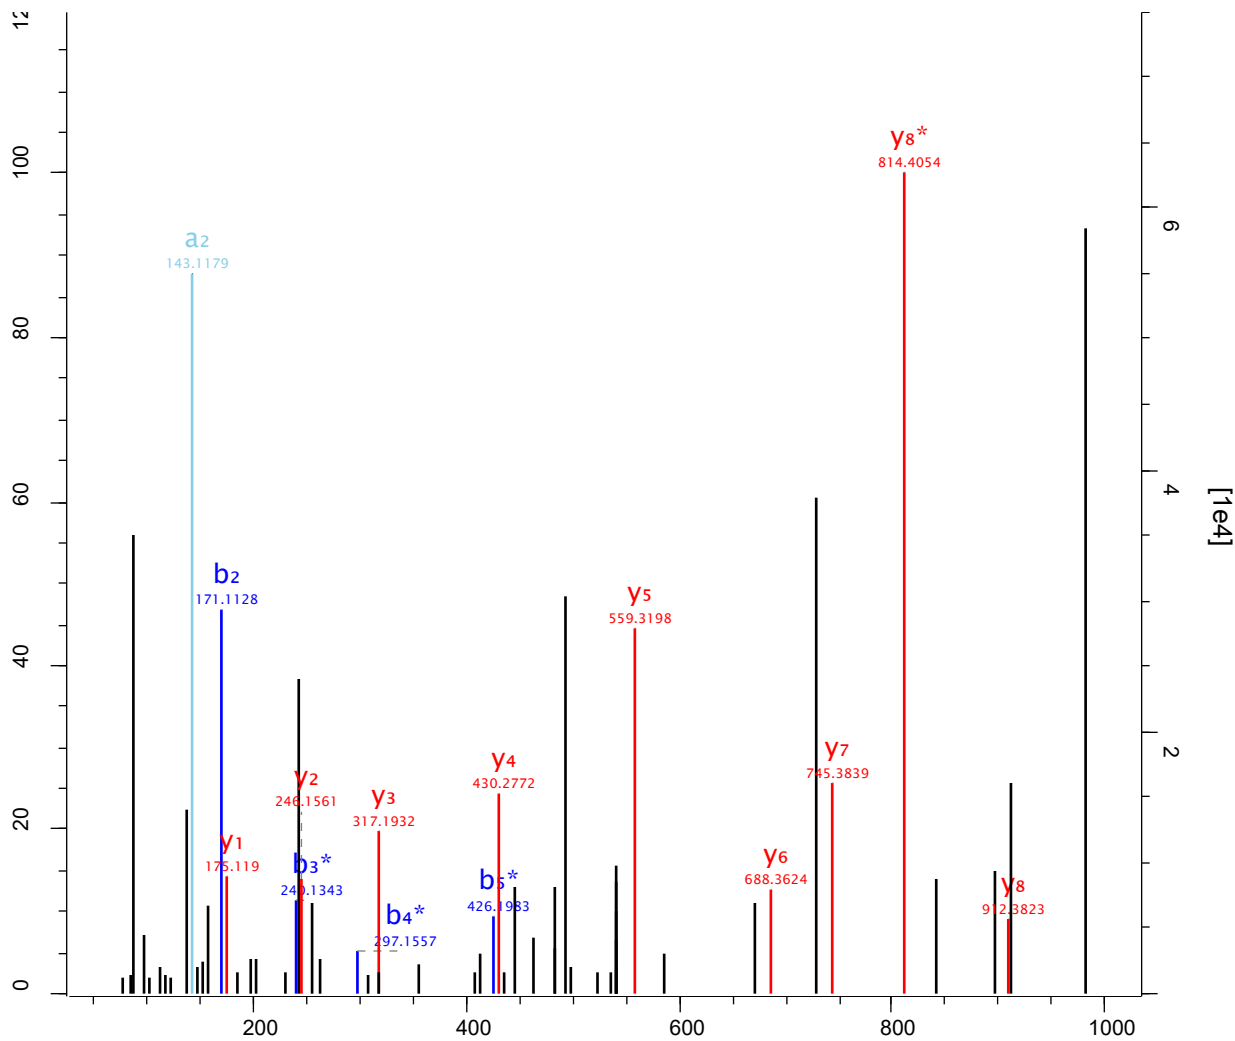

- G L y8  
ph  
S y7  
G y6  
E y5  
E y4  
L y3  
A y2  
A y1  
R -

b2 b3\* b4\* b5\*

Raw file Scan Method Score m/z  
 sys\_00\_3short 13862 FTMS; HCD 84.51 758.31

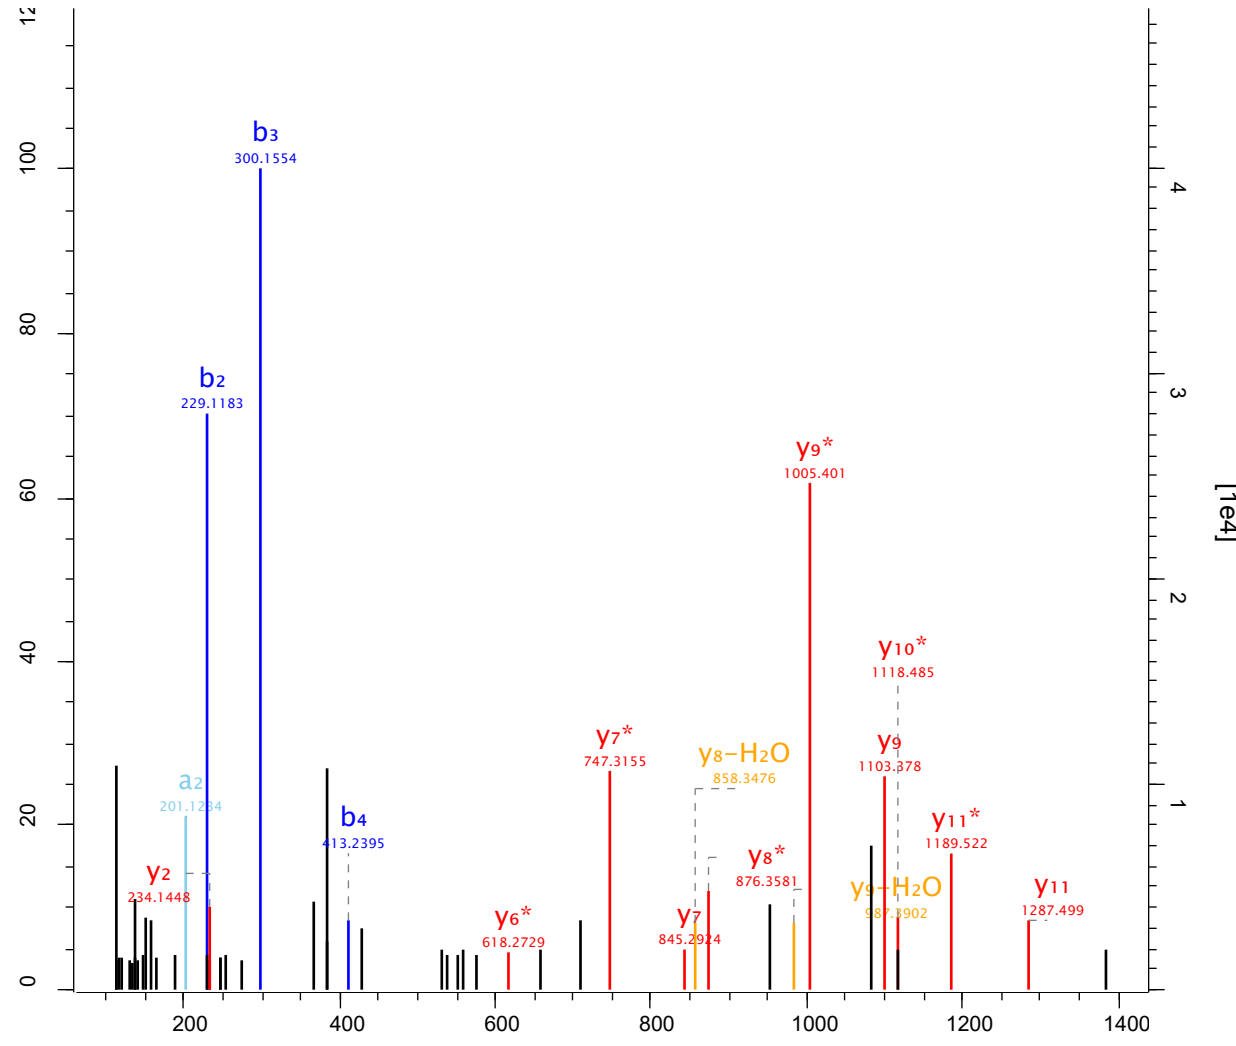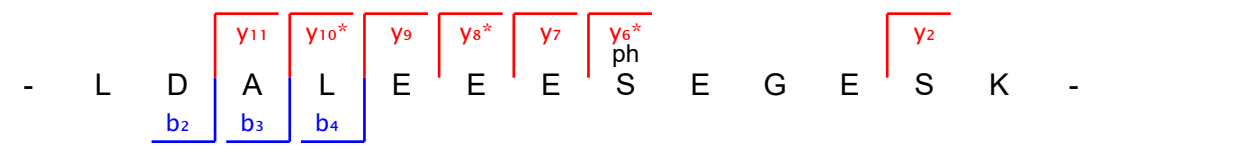

Raw file Scan Method Score m/z  
 sys\_00\_3short 14037 FTMS; HCD 89.51 561.79

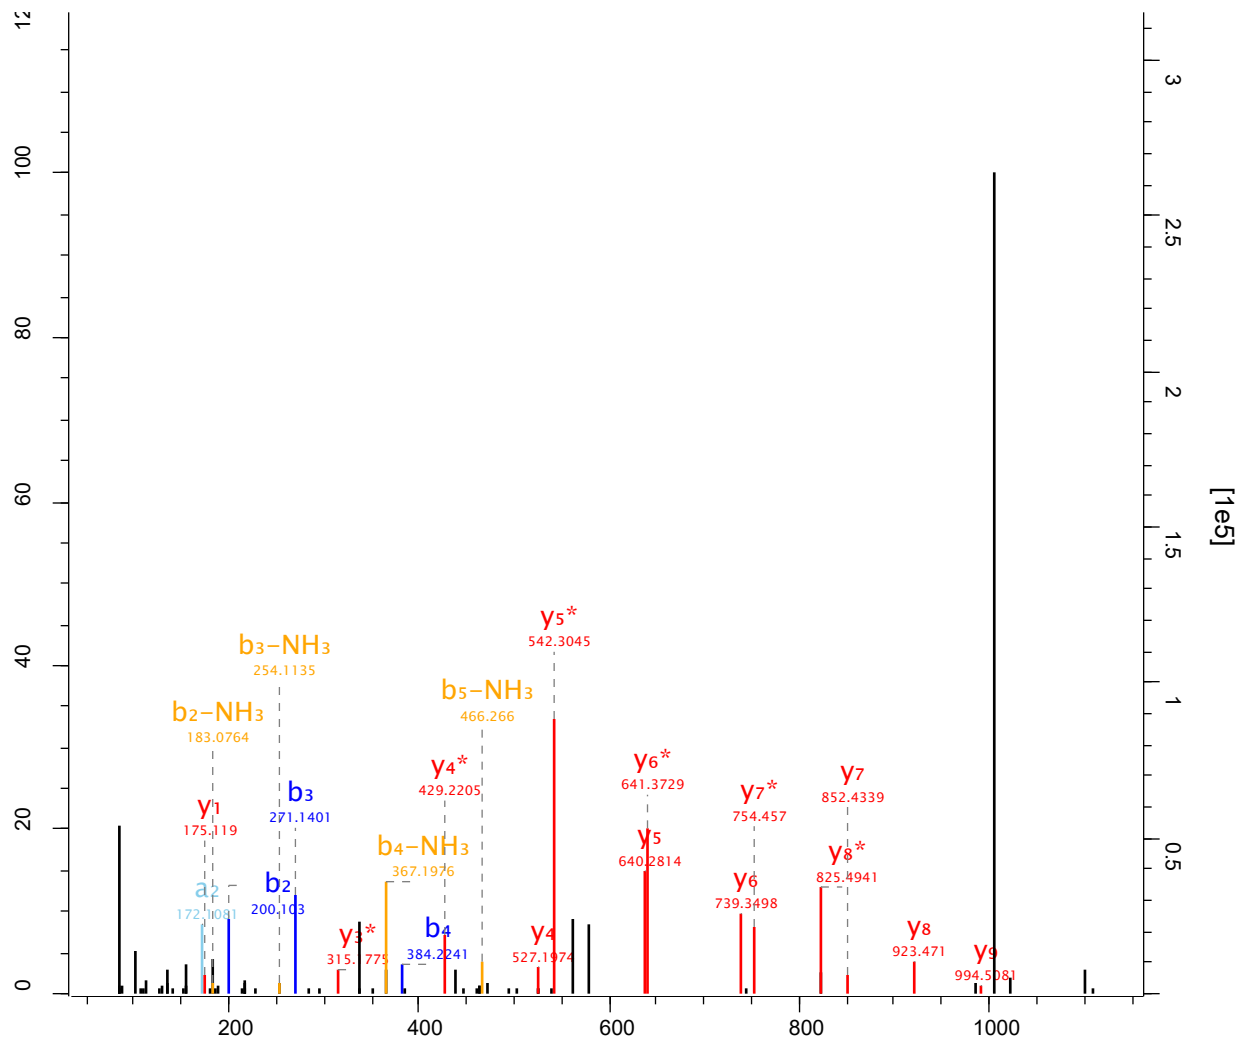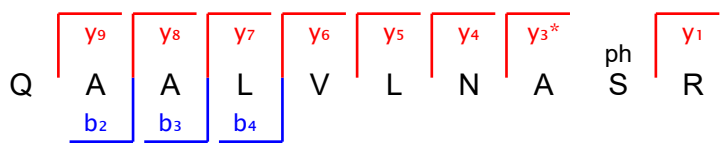

Raw file Scan Method Score m/z  
 sys\_00\_3short 14152 FTMS; HCD 82.35 695.3

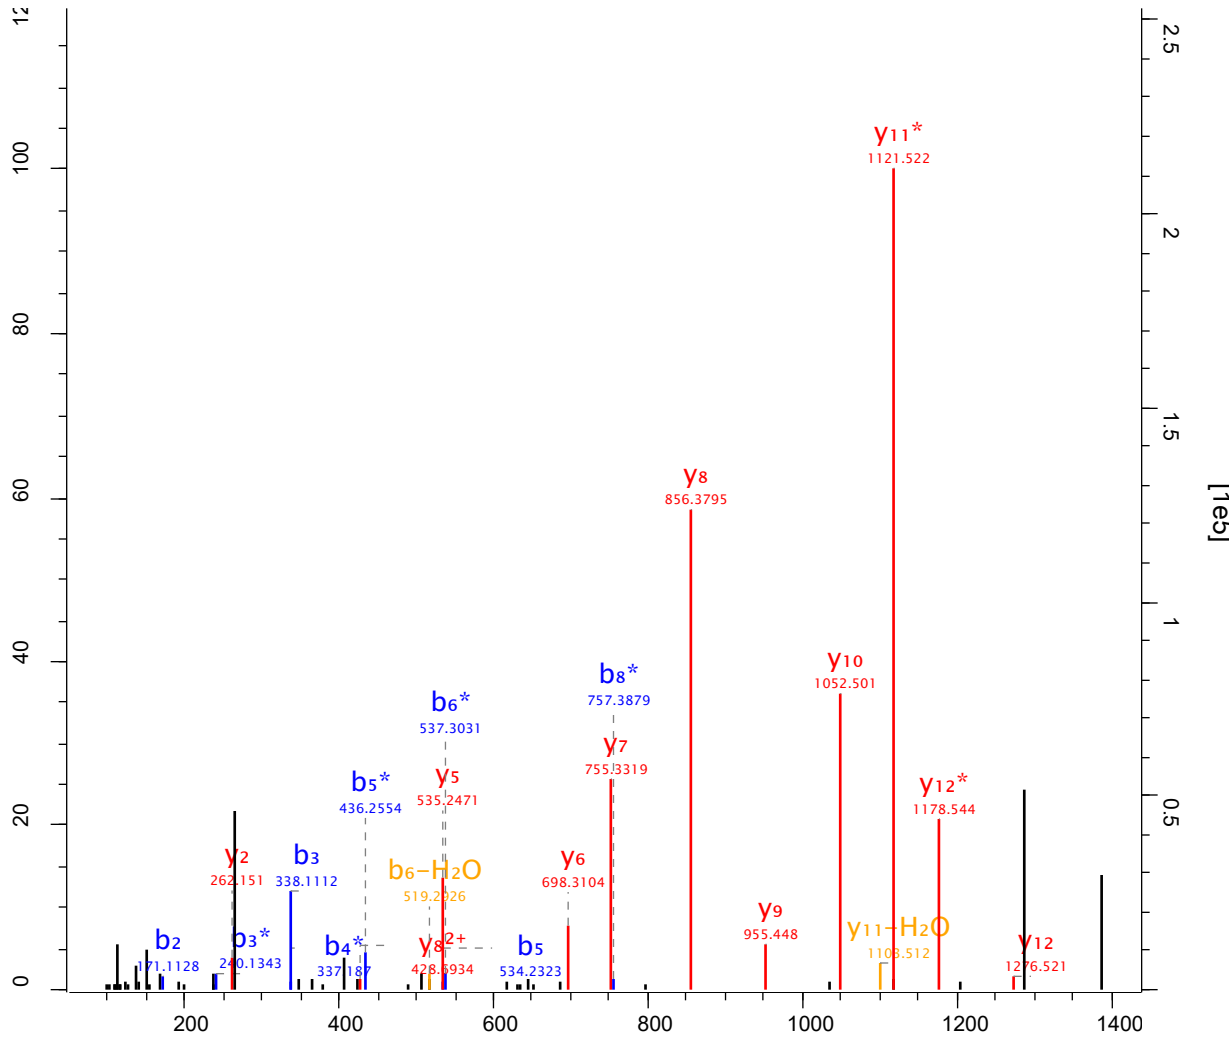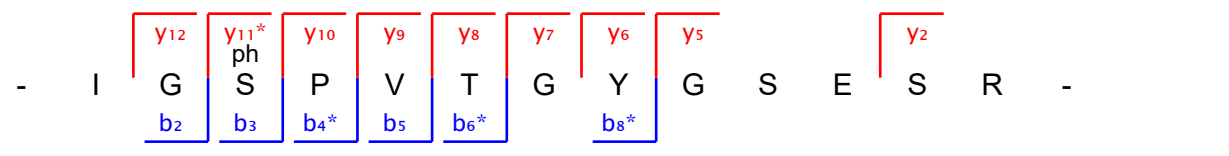

Raw file Scan Method Score m/z  
 sys\_00\_3short 14176 FTMS; HCD 200.58 769.79

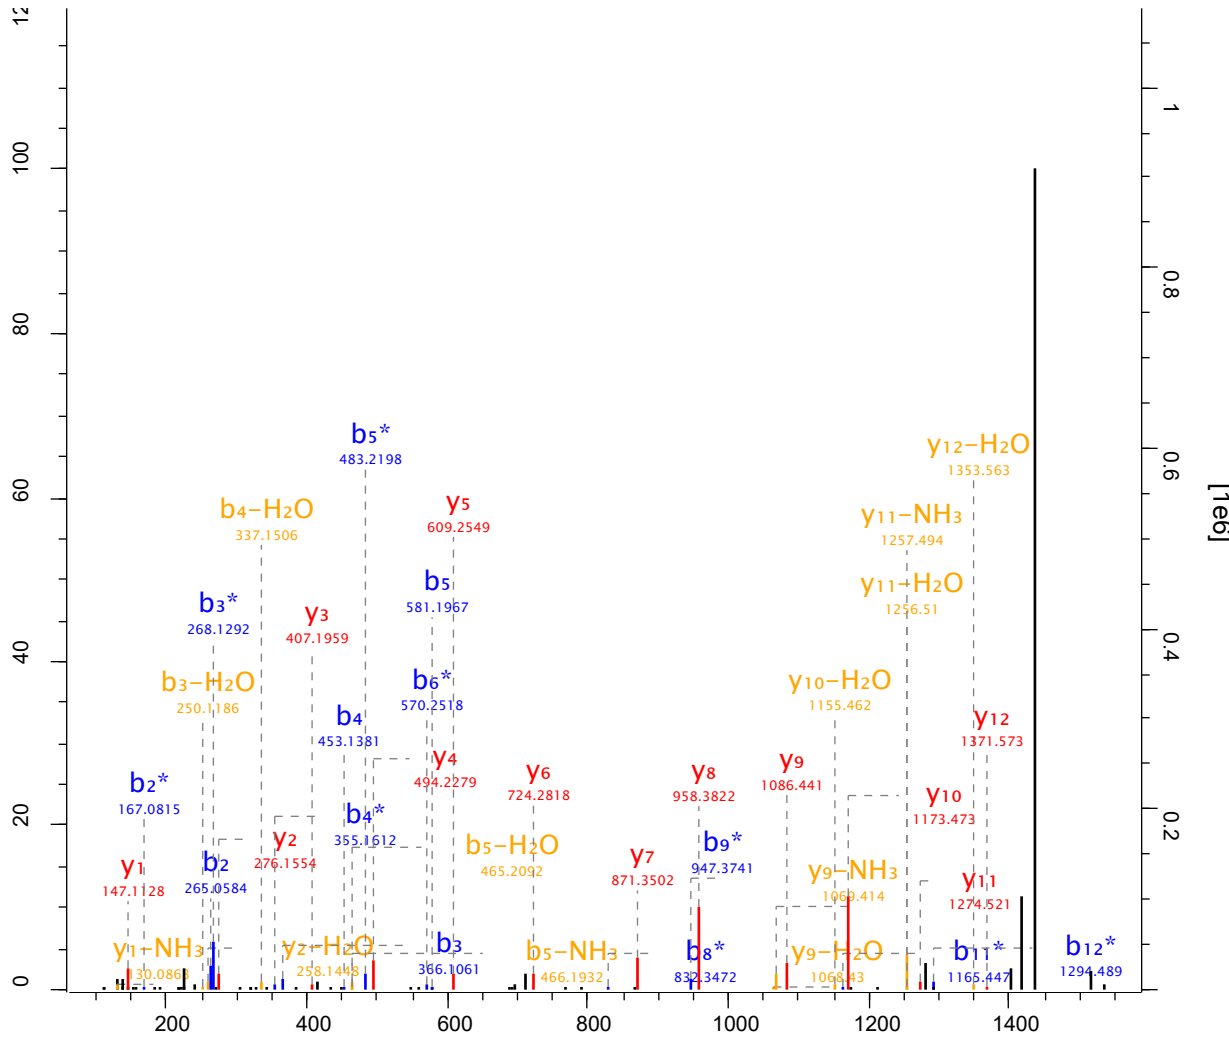

ph S  
 - P T S Q S F D D S M E K -  
 b<sub>2</sub> b<sub>3</sub> b<sub>4</sub> b<sub>5</sub> b<sub>6</sub><sup>\*</sup> b<sub>8</sub><sup>\*</sup> b<sub>9</sub><sup>\*</sup> b<sub>11</sub><sup>\*</sup> b<sub>12</sub><sup>\*</sup>

Raw file Scan Method Score m/z  
 sys\_00\_3short 14218 FTMS; HCD 108.72 528.73

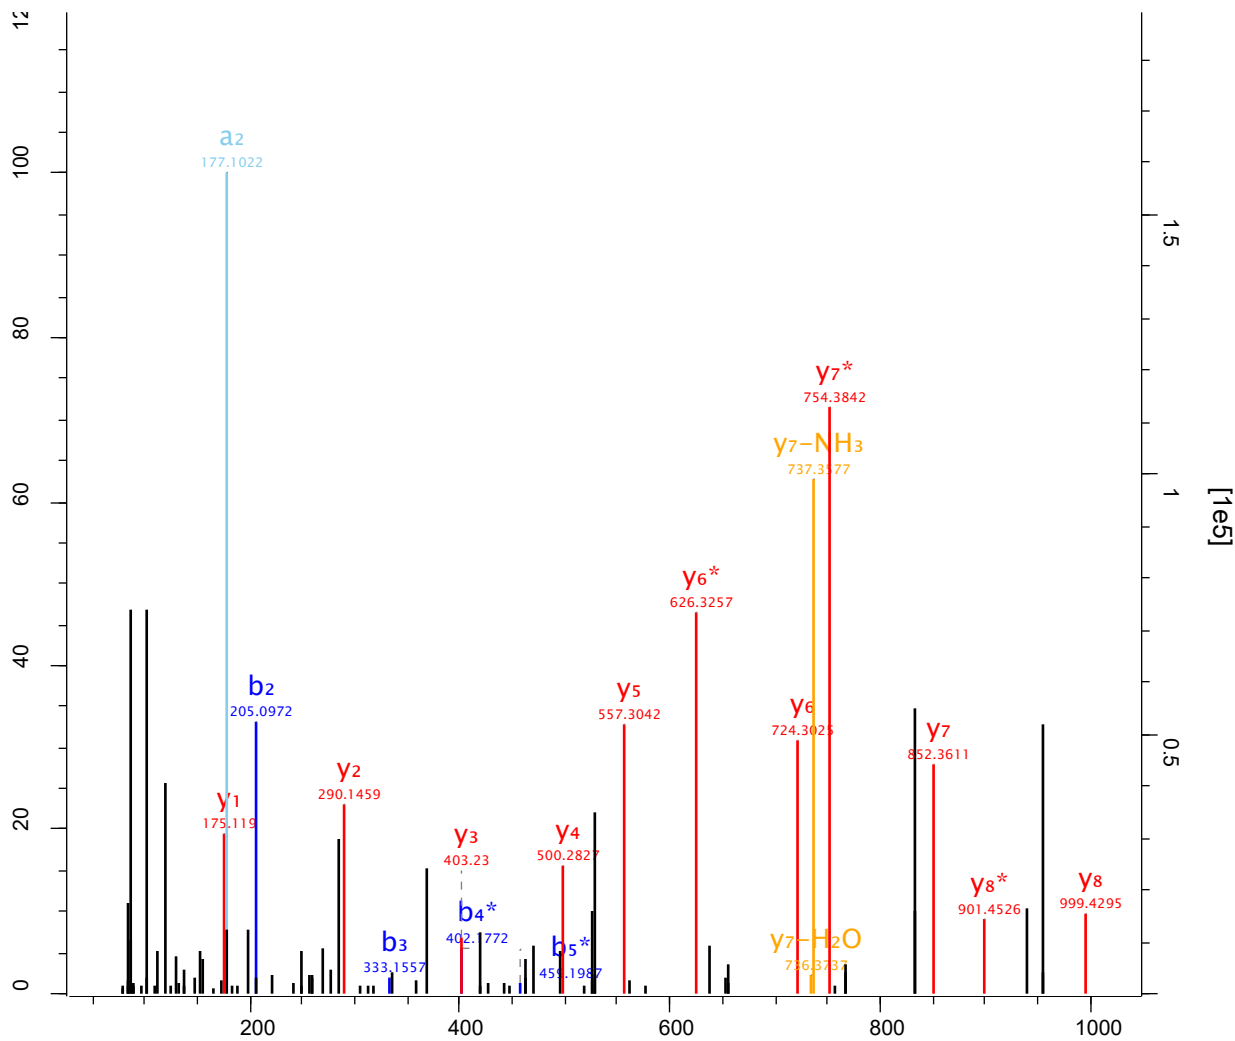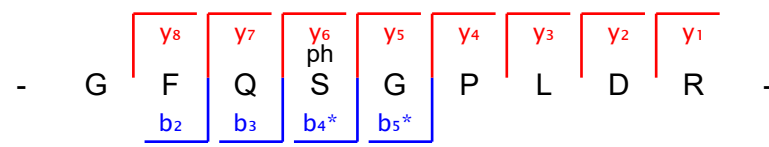

Raw file Scan Method Score m/z  
 sys\_00\_3short 14426 FTMS; HCD 98.05 512.73

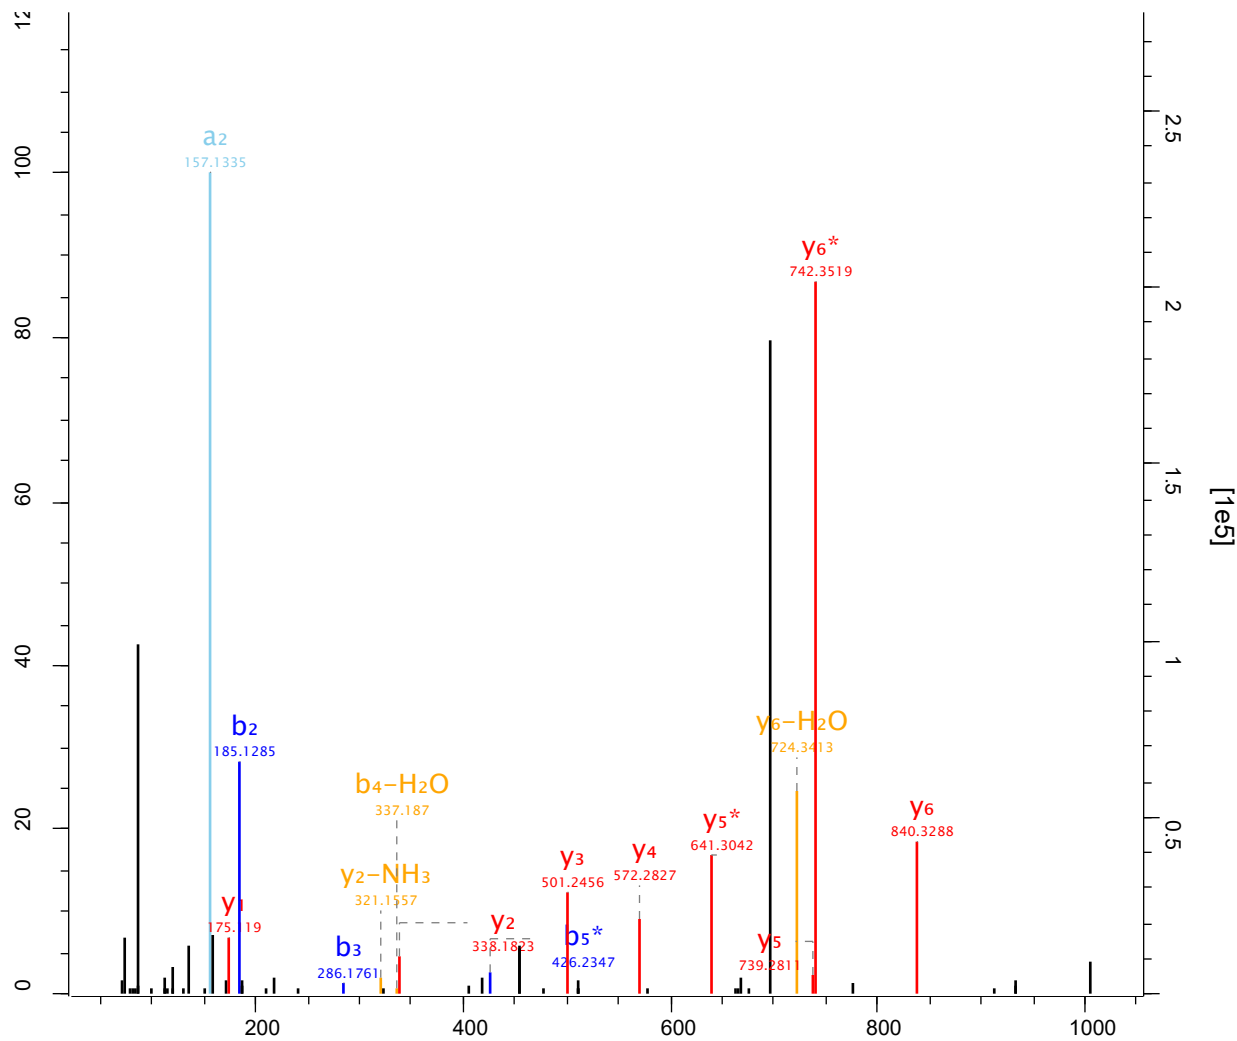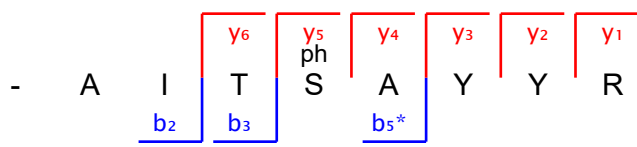



Raw file Scan Method Score m/z  
 sys\_00\_3short 14444 FTMS; HCD 117.18 802.32

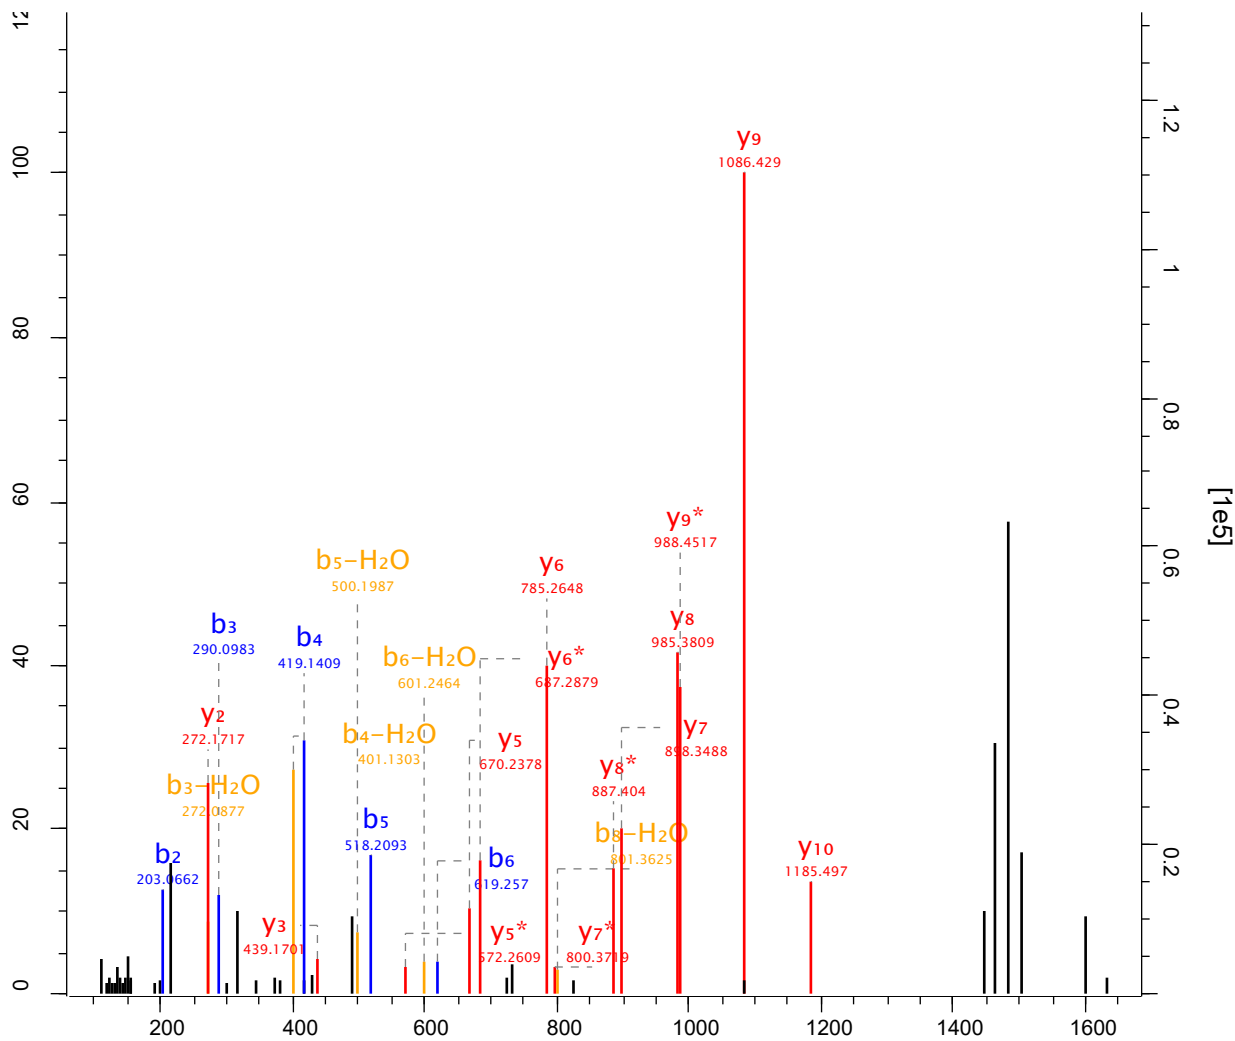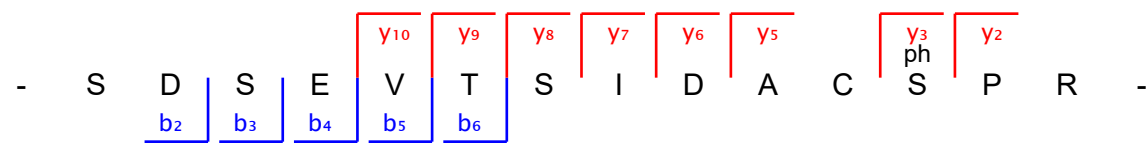

Raw file Scan Method Score m/z  
 sys\_00\_3short 14450 FTMS; HCD 82.07 563.76

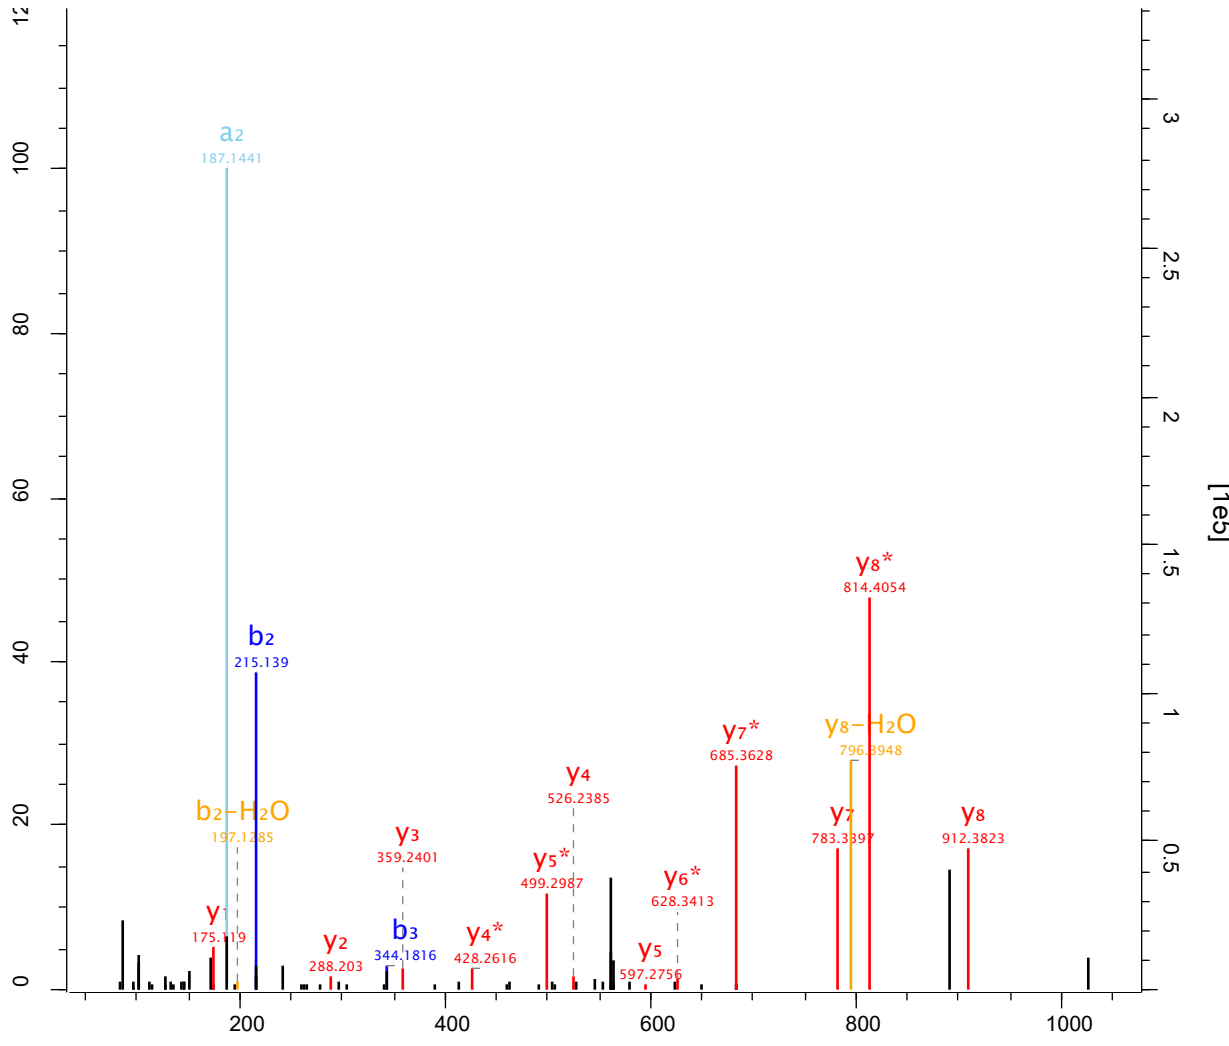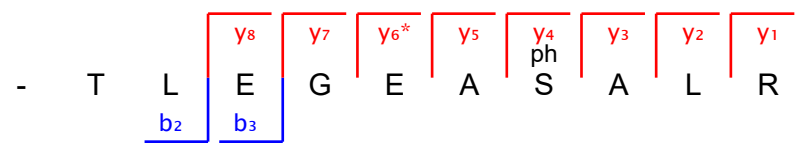

Raw file Scan Method Score m/z  
 sys\_00\_3short 14488 FTMS; HCD 45.89 506.21

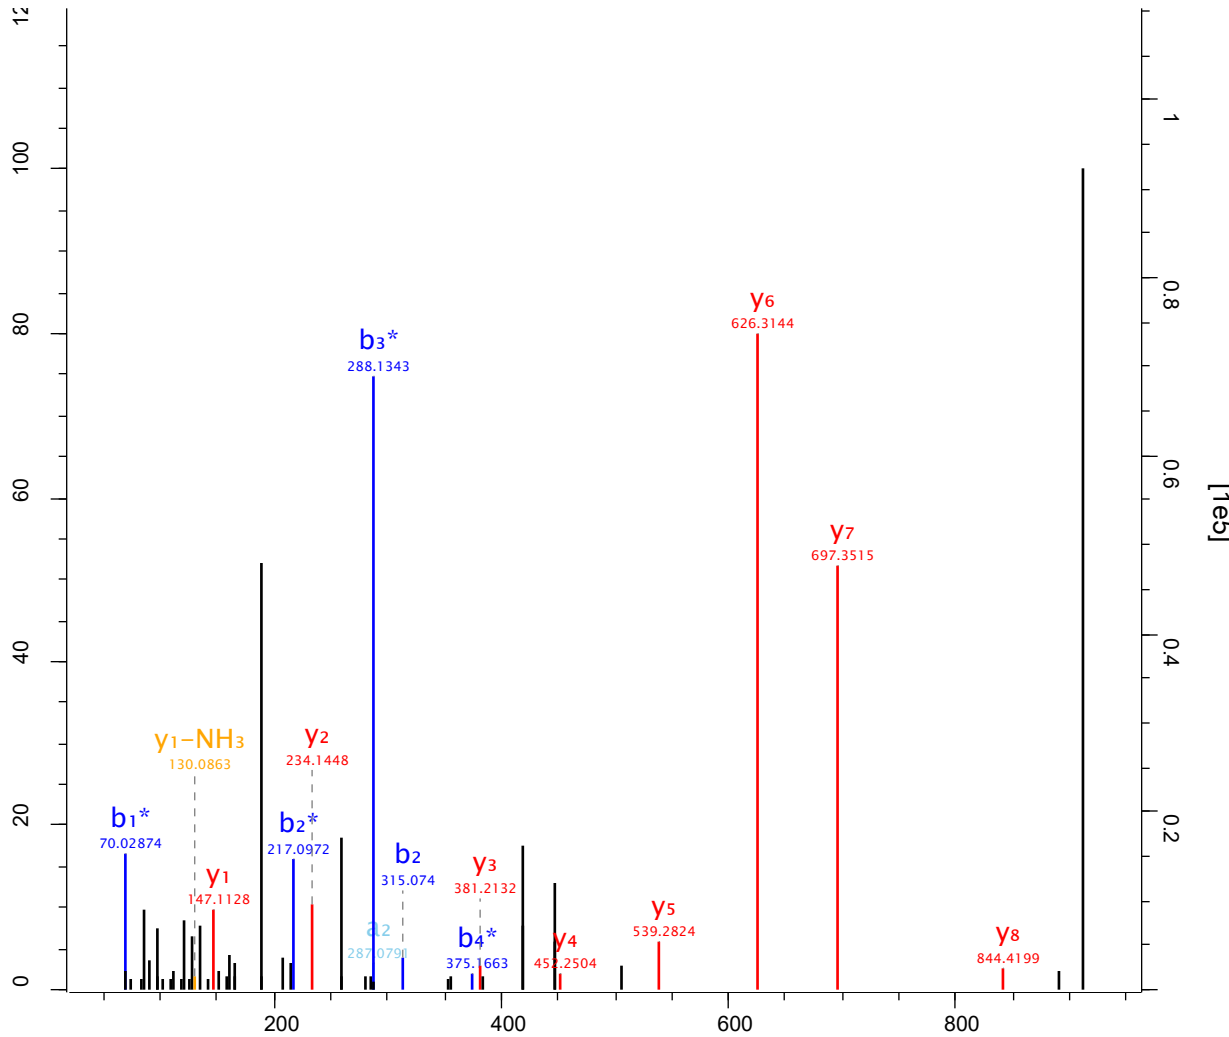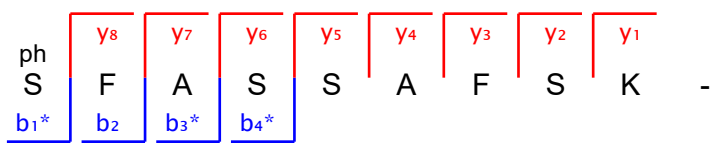

Raw file Scan Method Score m/z  
 sys\_00\_3short 14628 FTMS; HCD 185.96 511.23

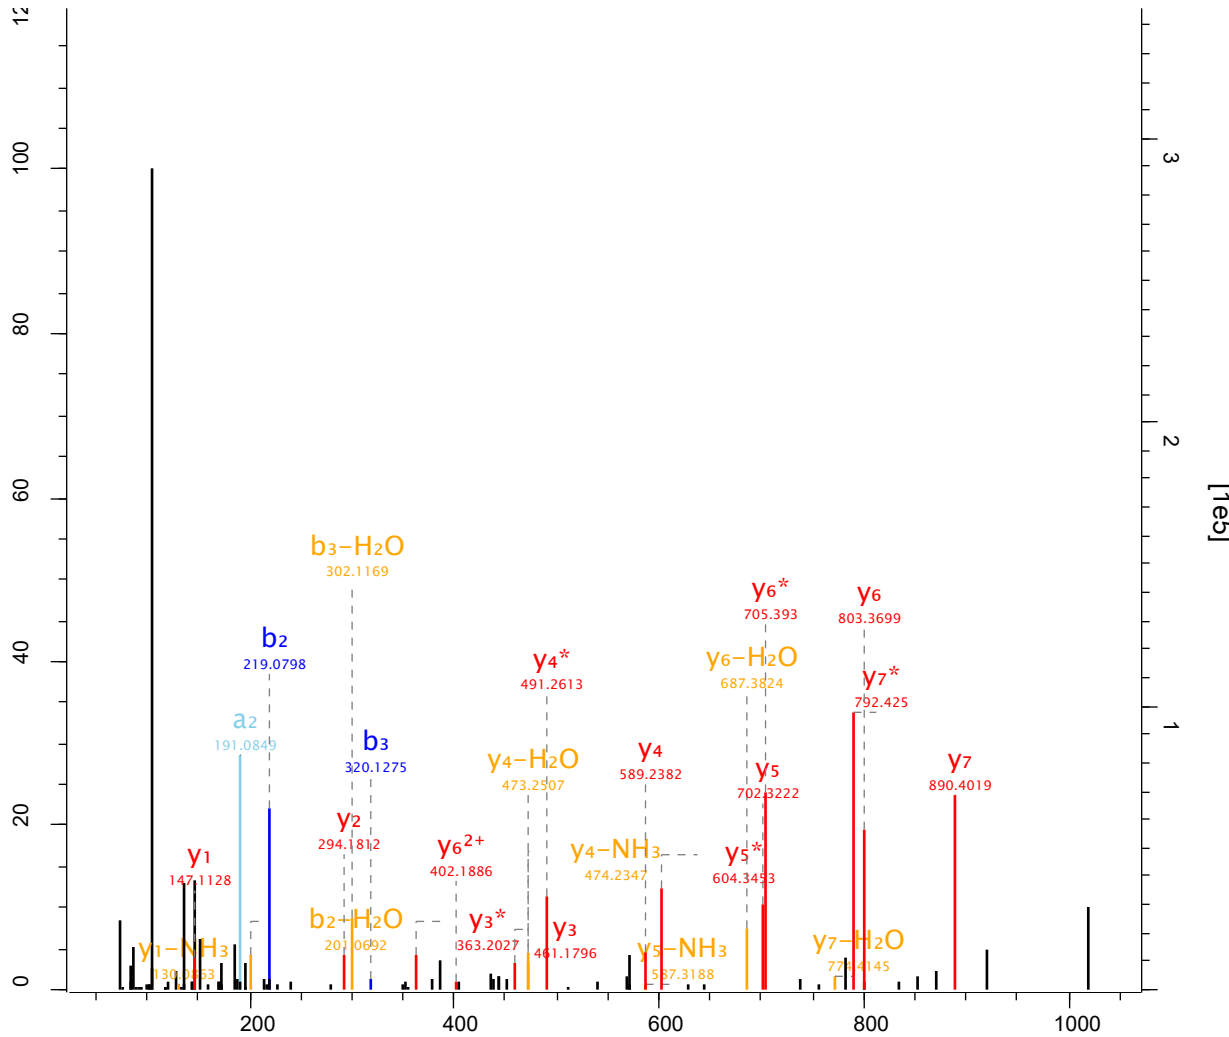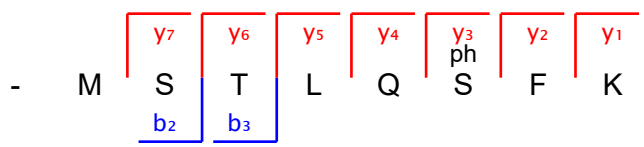

Raw file Scan Method Score m/z  
 sys\_00\_3short 14744 FTMS; HCD 96.46 562.26

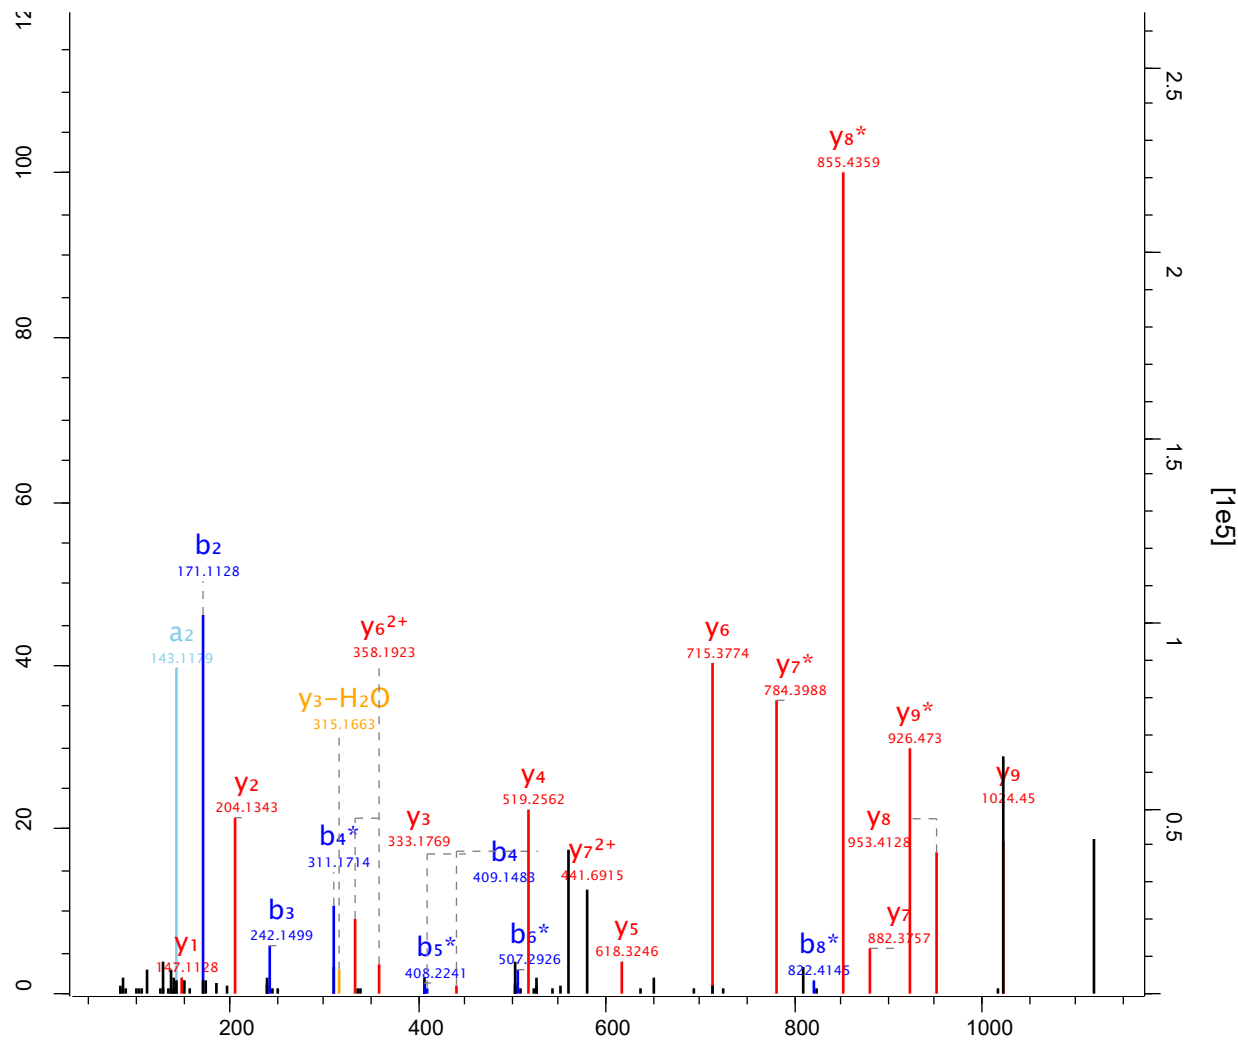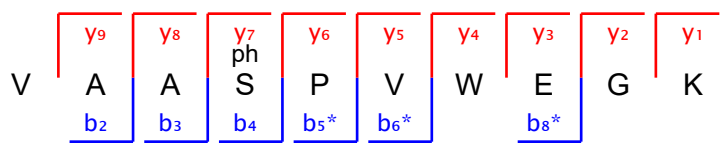

Raw file Scan Method Score m/z  
 sys\_00\_3short 15024 FTMS; HCD 117.93 568.75

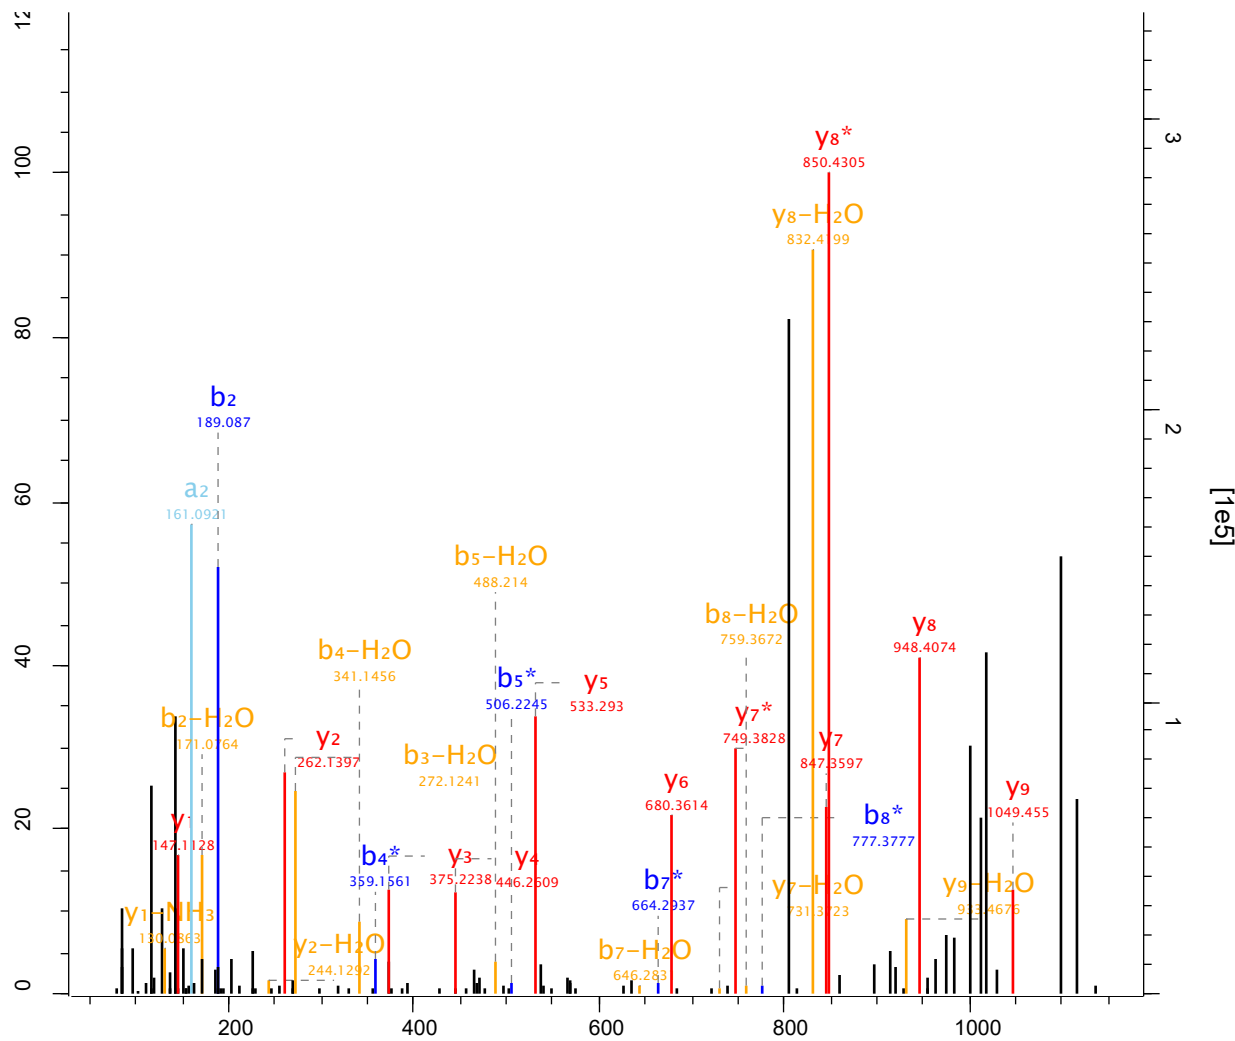

- S T T S F S A L D K -

y9
y8
y7  
ph
y6
y5
y4
y3
y2
y1

b2
b4\*
b5\*
b7\*
b8\*

Raw file Scan Method Score m/z  
 sys\_00\_3short 15426 FTMS; HCD 44.85 482.73

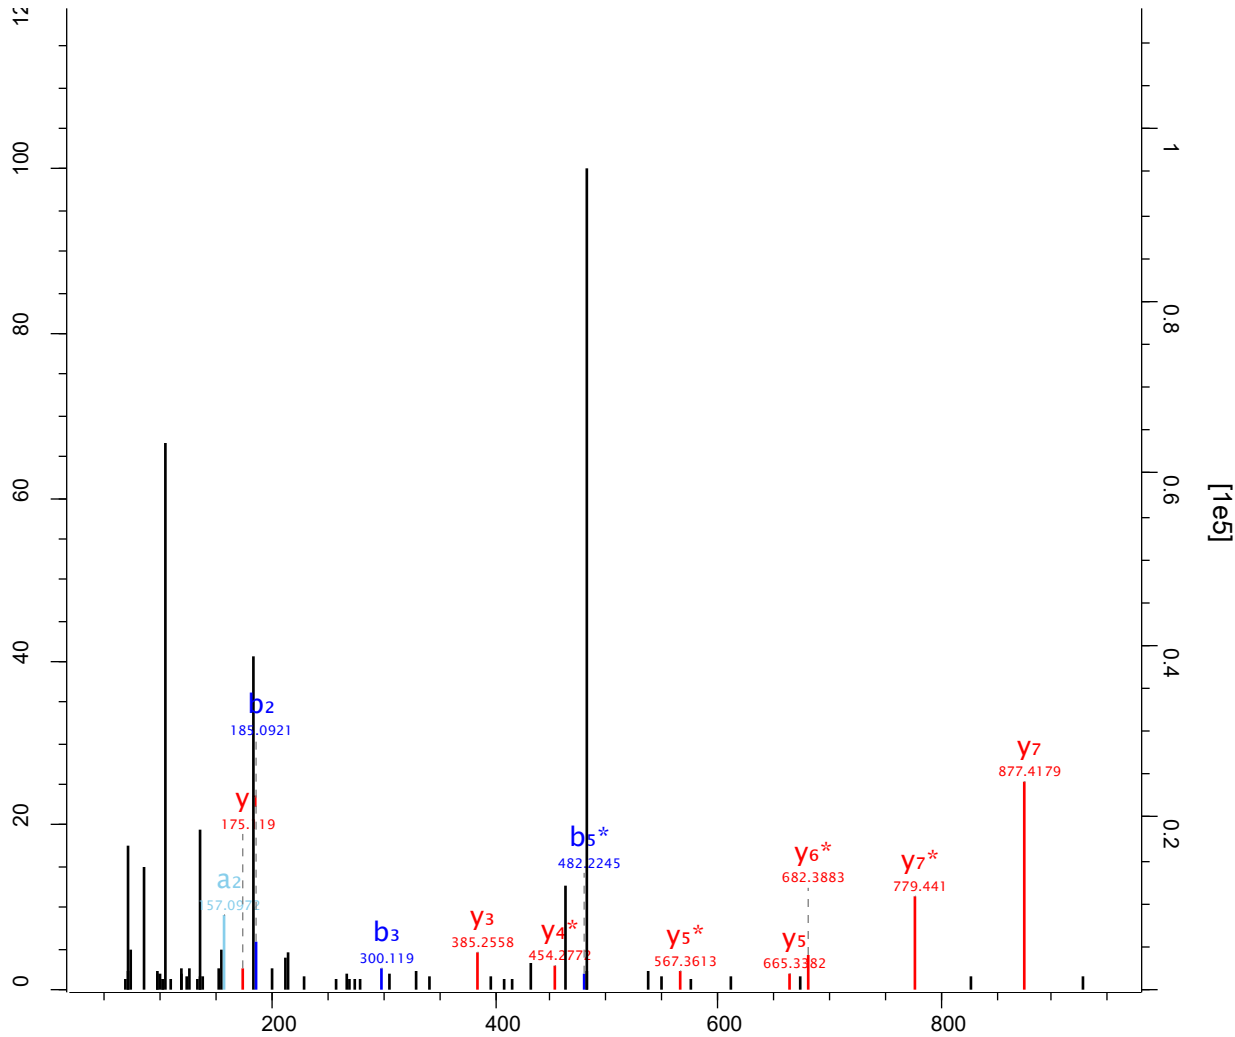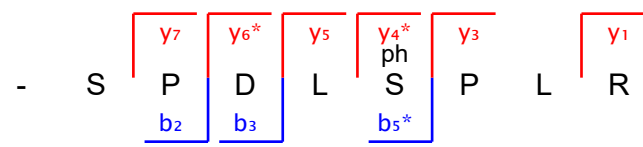

Raw file Scan Method Score m/z  
 sys\_00\_3short 15684 FTMS; HCD 85.81 697.78

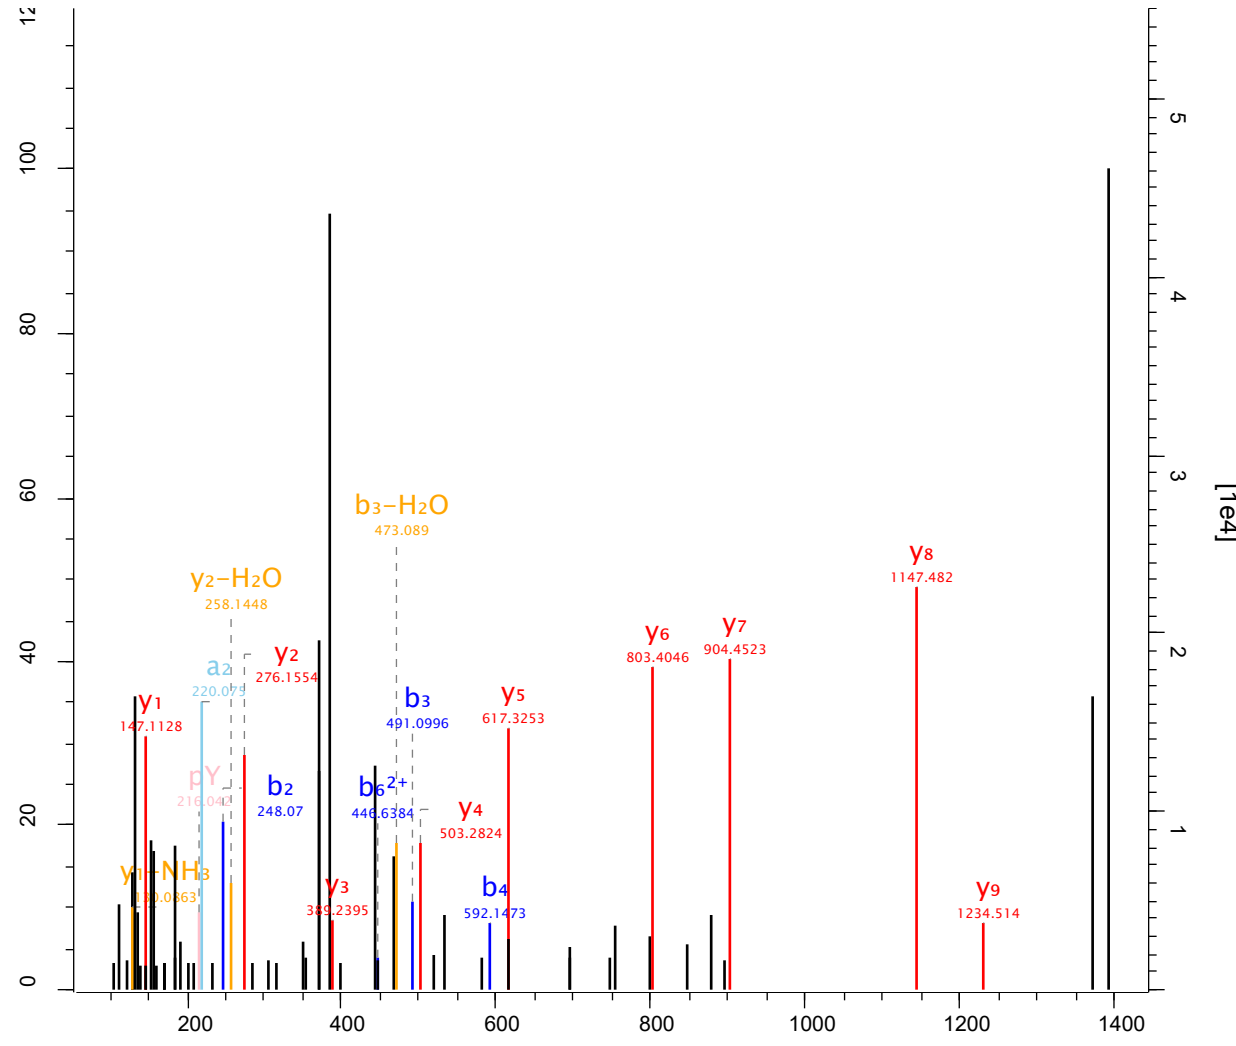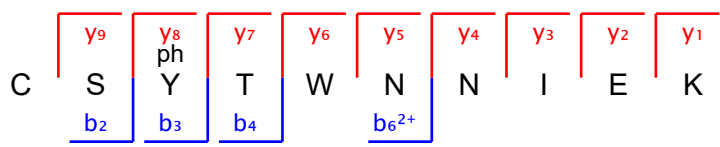



Raw file Scan Method Score m/z  
 sys\_00\_3short 15821 FTMS; HCD 105.03 613.29

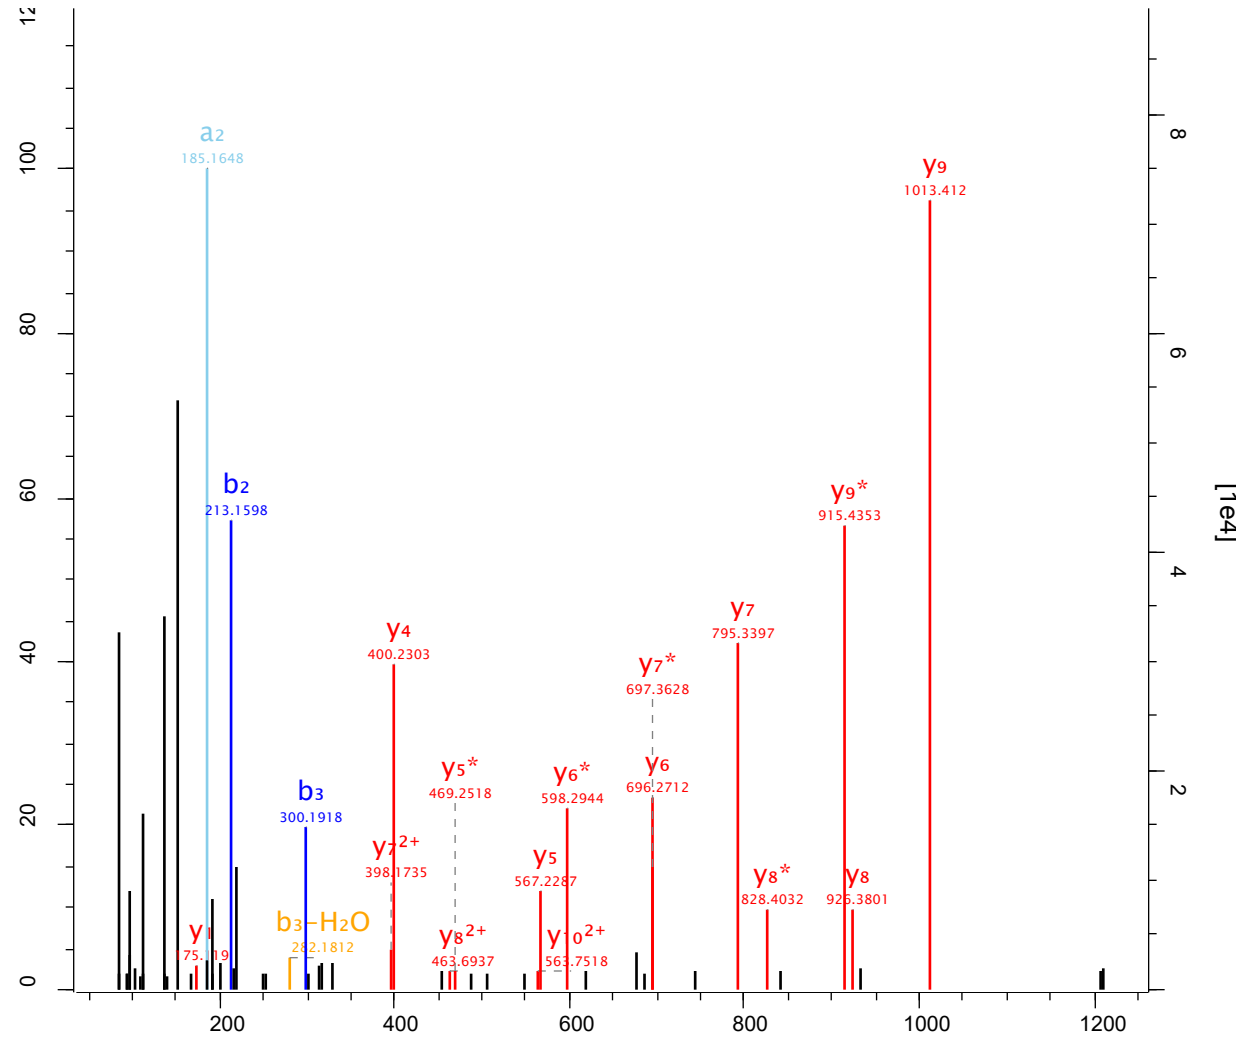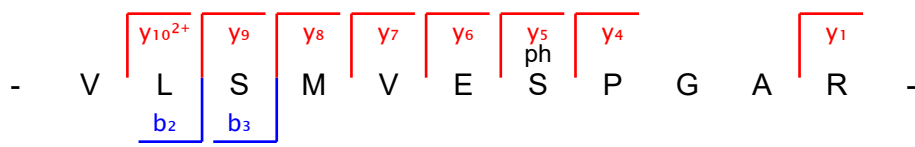

Raw file Scan Method Score m/z  
 sys\_00\_3short 15846 FTMS; HCD 163.99 700.81

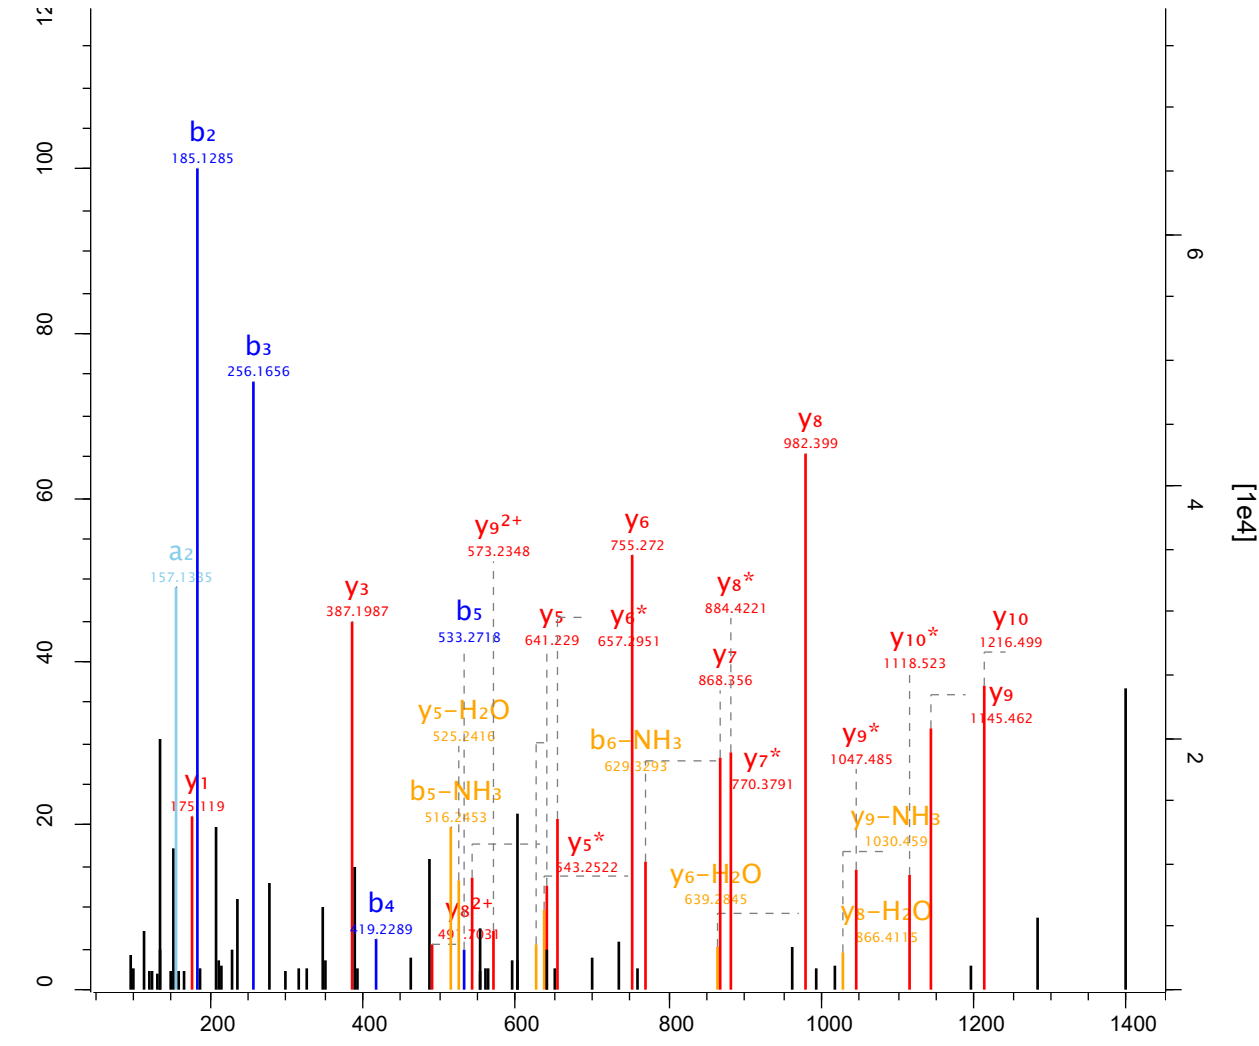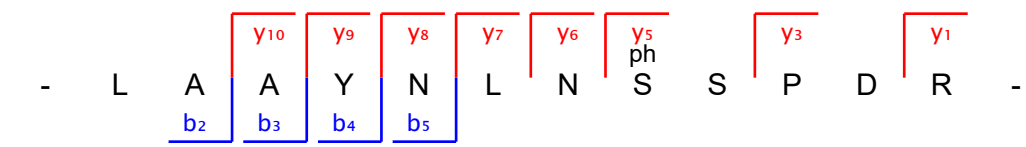

Raw file Scan Method Score m/z  
 sys\_00\_3short 15878 FTMS; HCD 46.84 513.25

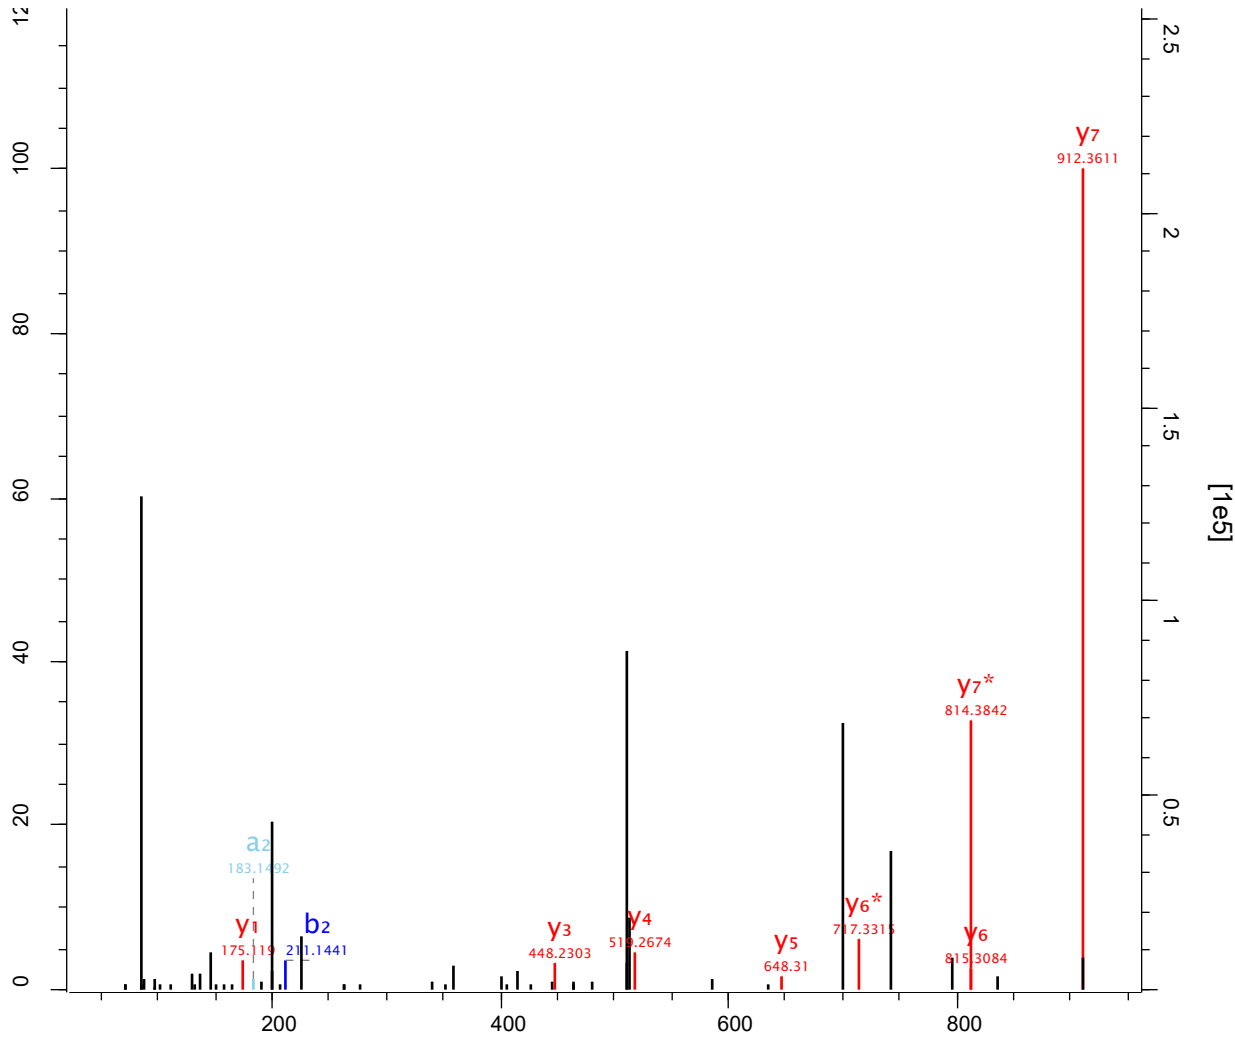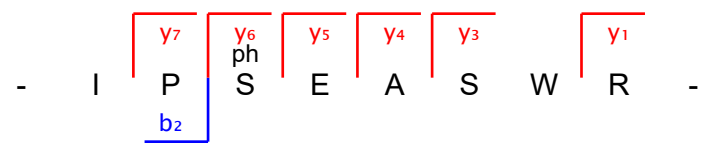

| Raw file      | Scan  | Method    | Score | m/z    |
|---------------|-------|-----------|-------|--------|
| sys_00_3short | 15891 | FTMS; HCD | 69.72 | 483.73 |

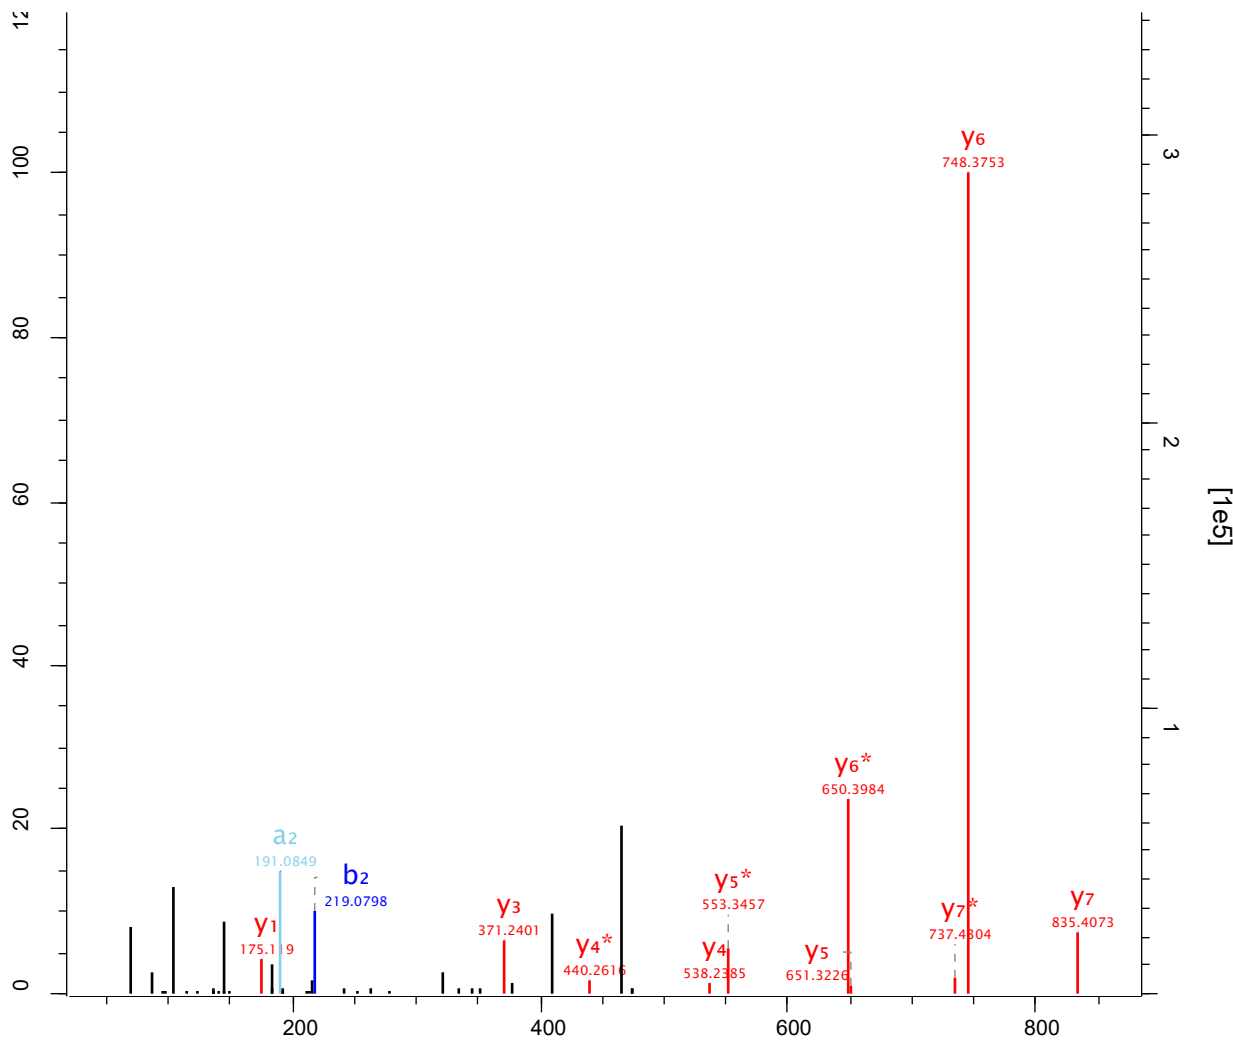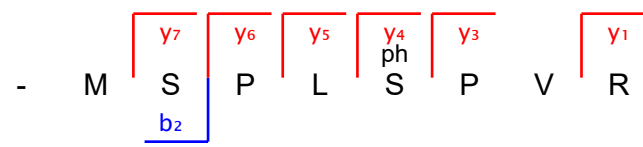

Raw file Scan Method Score m/z  
 sys\_00\_3short 15895 FTMS; HCD 117.7 620.77

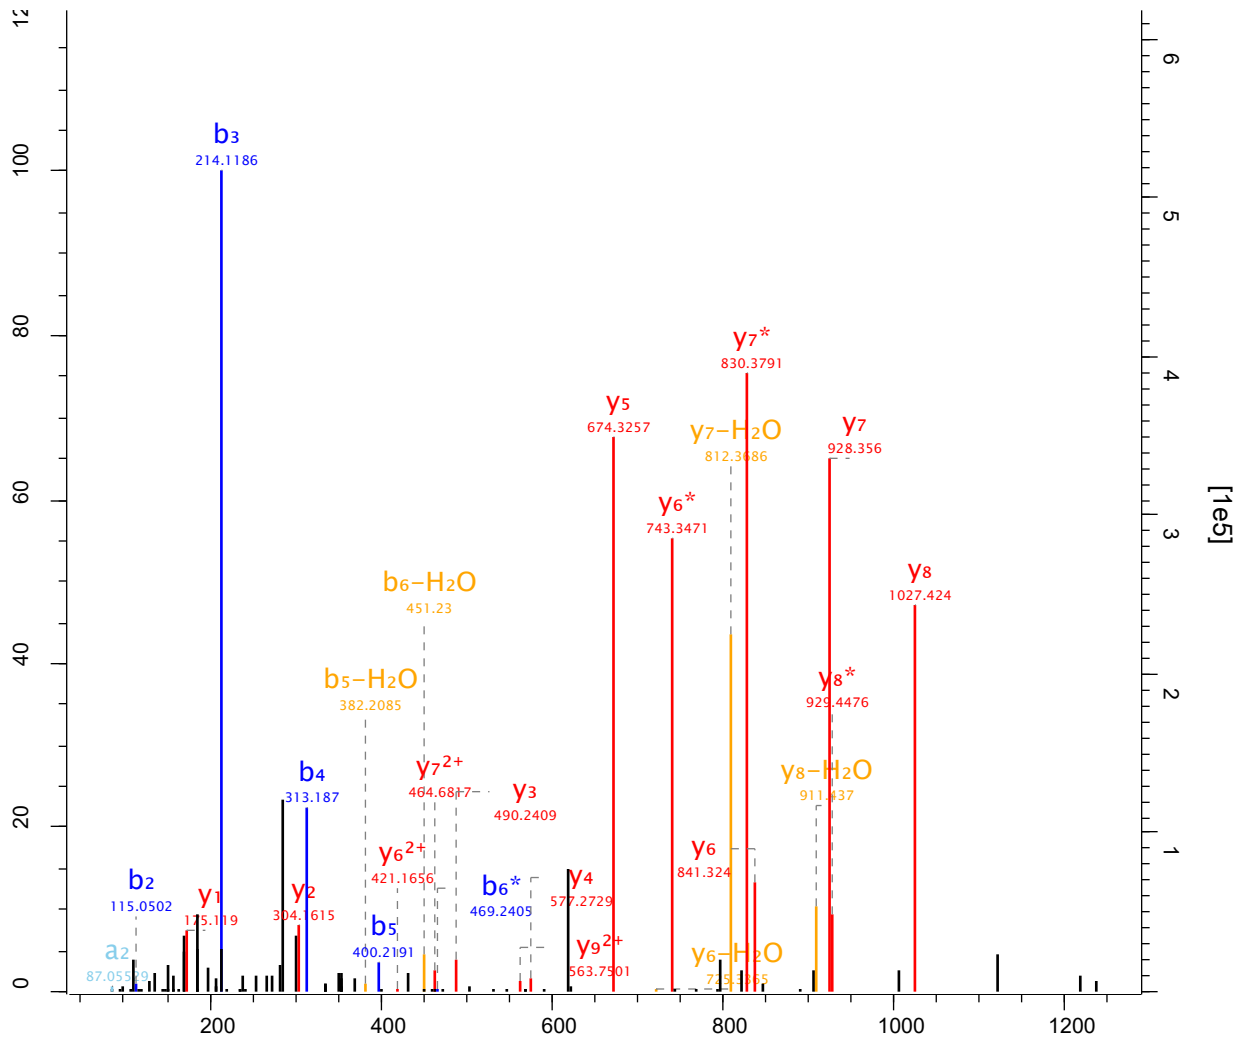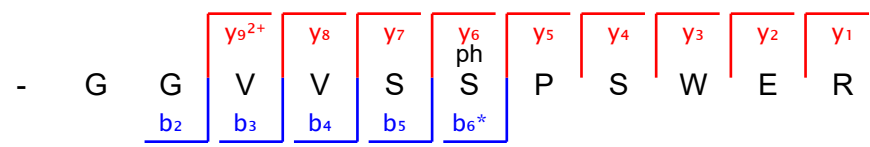

Raw file Scan Method Score m/z  
 sys\_00\_3short 16065 FTMS; HCD 128.59 761.84

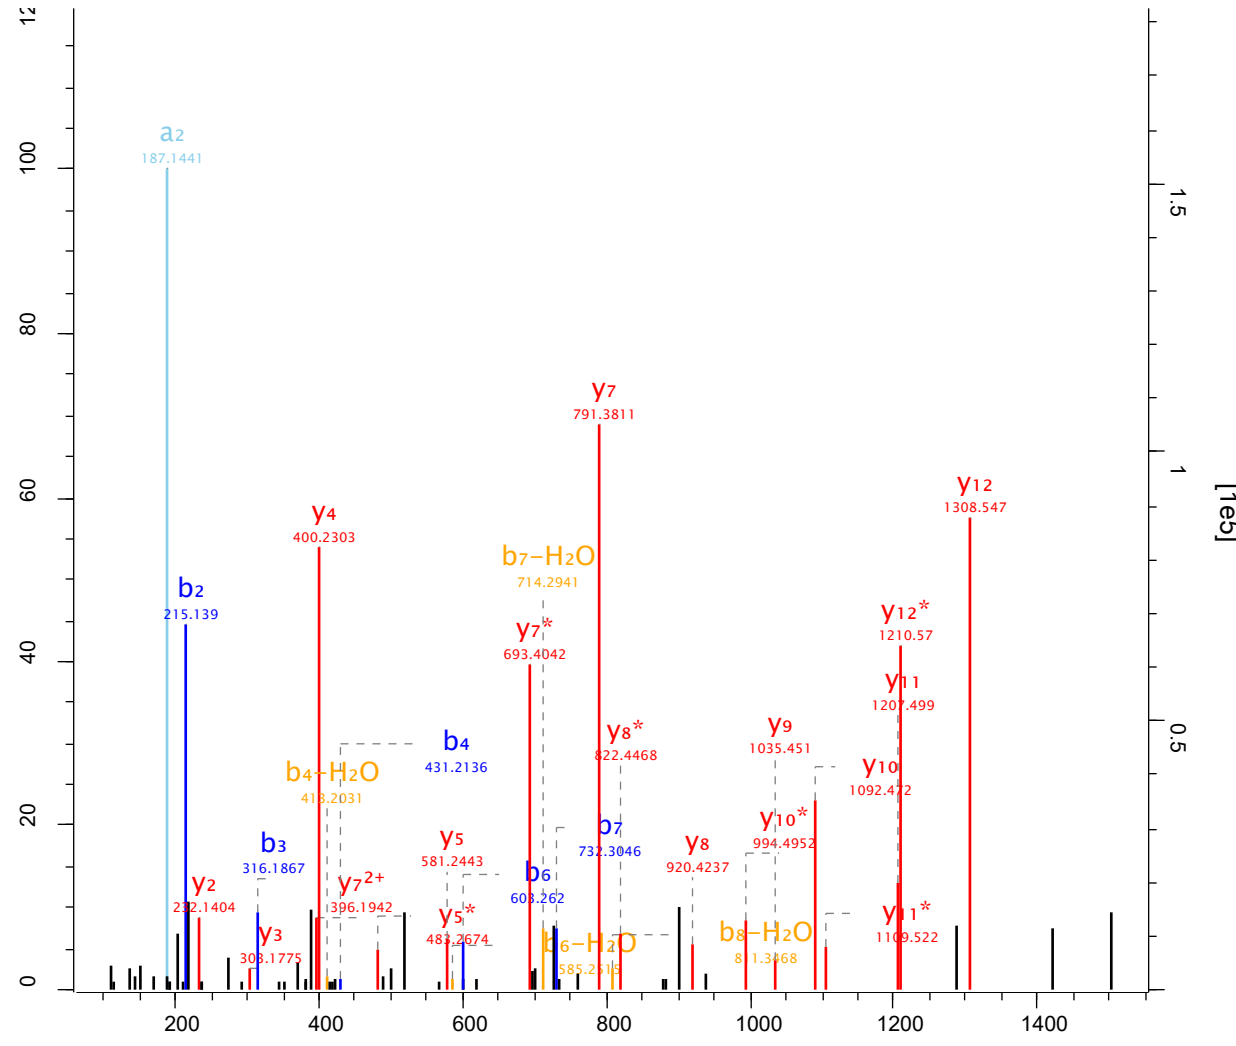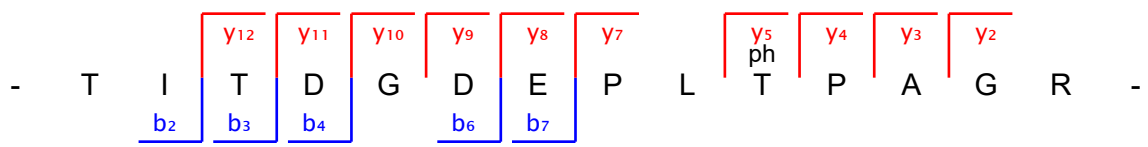

| Raw file      | Scan  | Method    | Score | m/z    |
|---------------|-------|-----------|-------|--------|
| sys_00_3short | 16229 | FTMS; HCD | 47.5  | 934.43 |

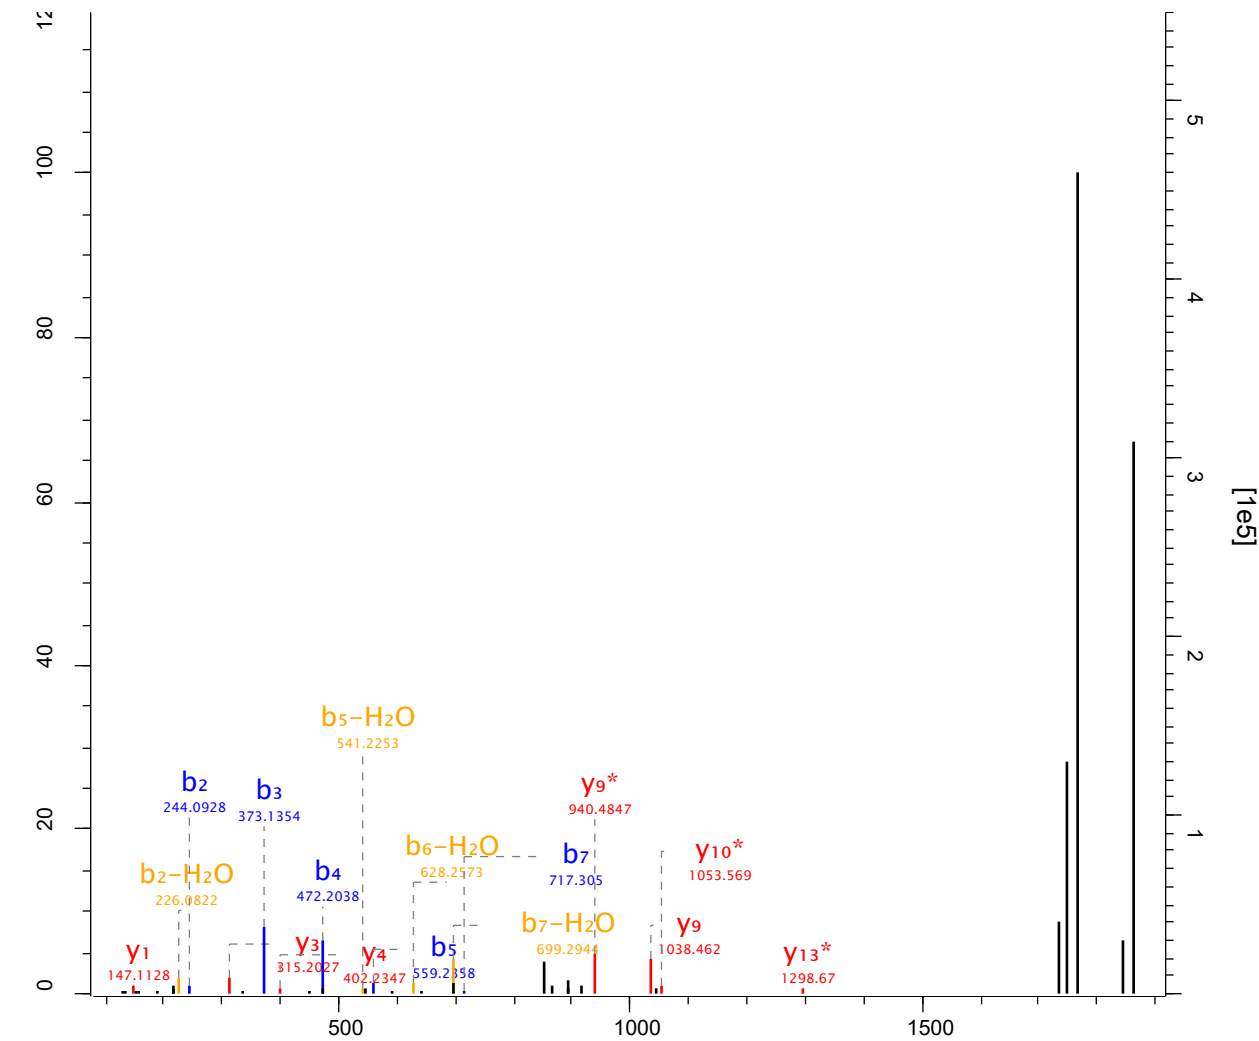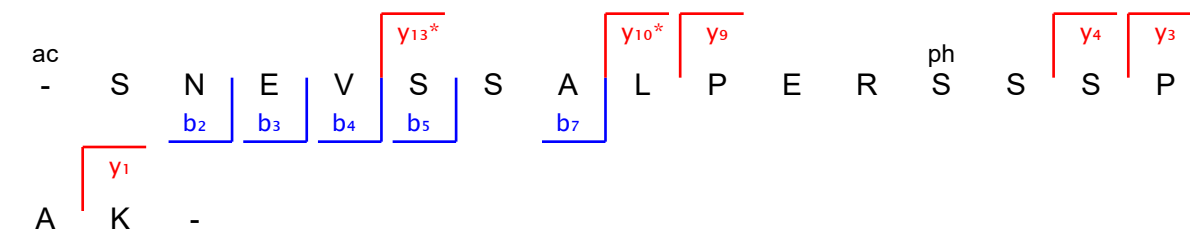

Raw file Scan Method Score m/z  
 sys\_00\_3short 16276 FTMS; HCD 71.88 692.28

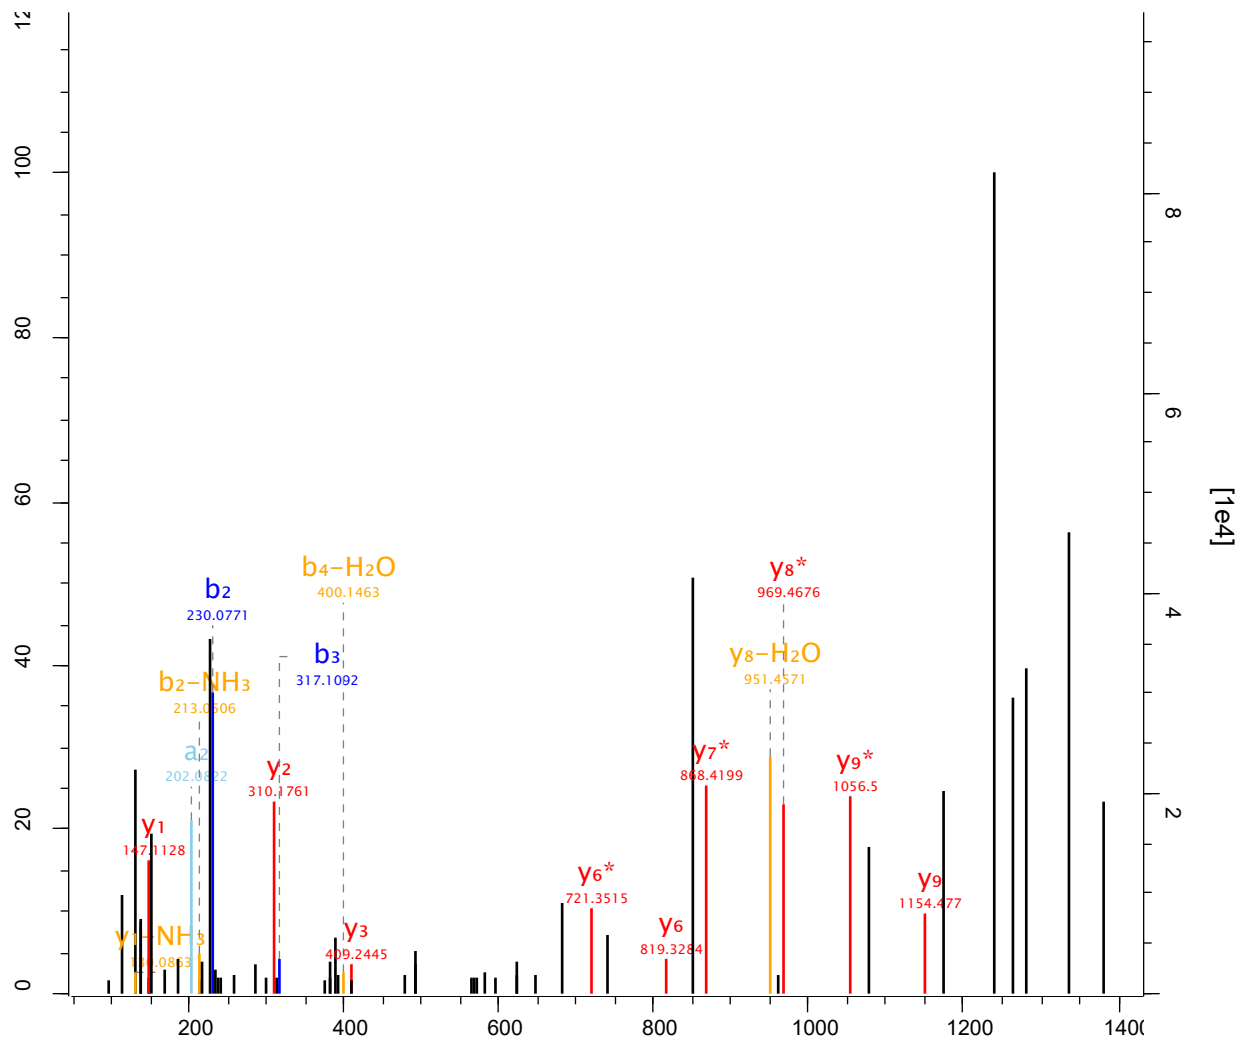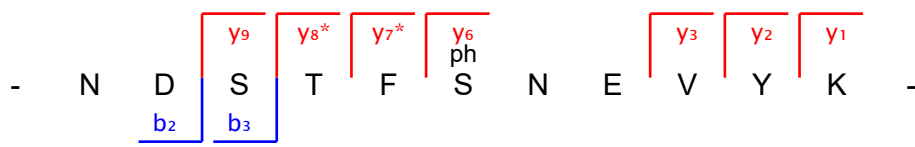



| Raw file      | Scan  | Method    | Score | m/z    |
|---------------|-------|-----------|-------|--------|
| sys_00_3short | 16361 | FTMS; HCD | 47.6  | 452.18 |

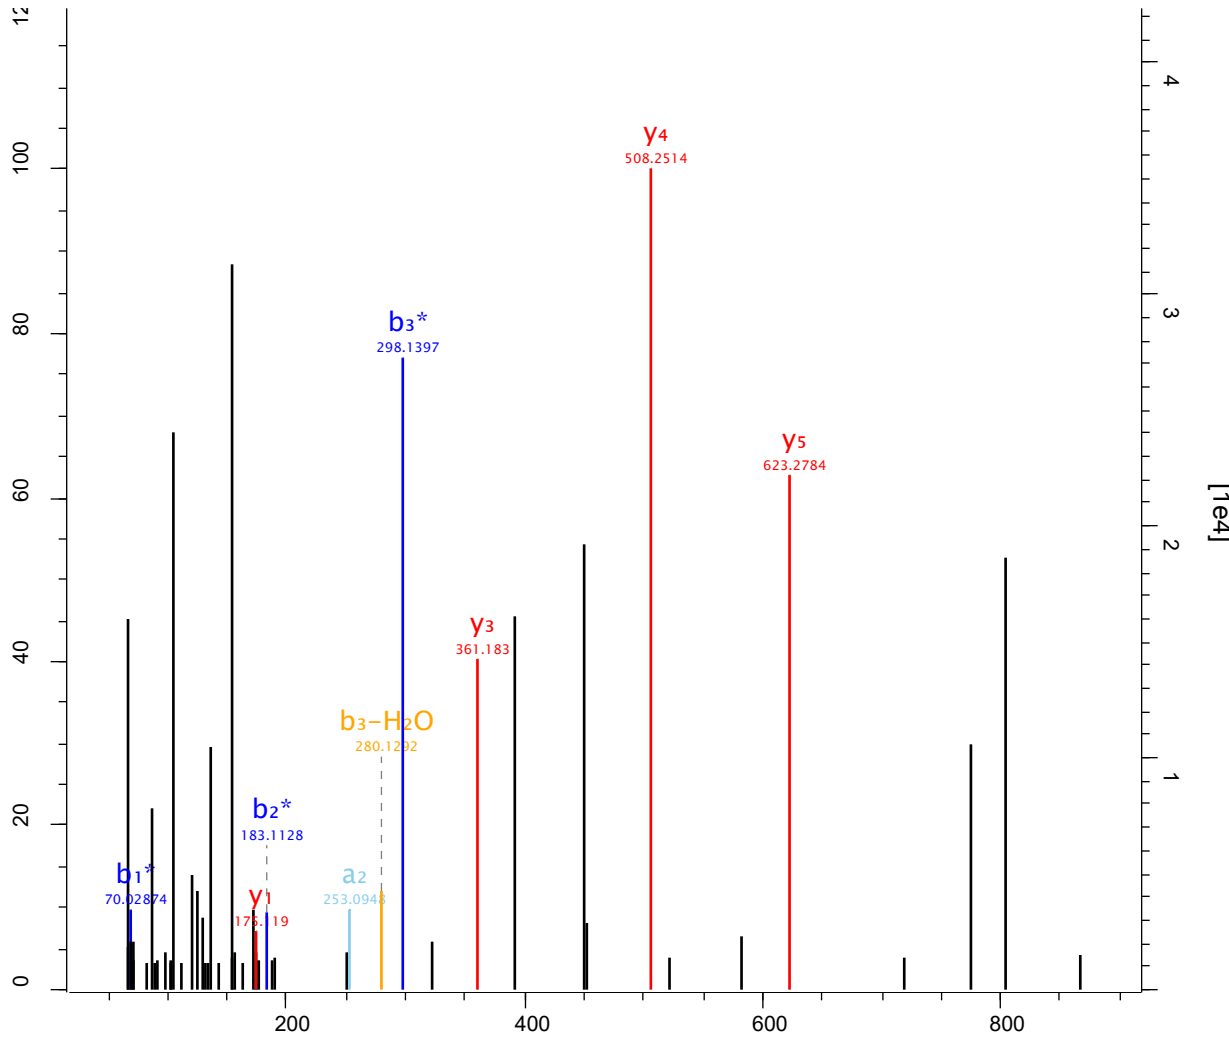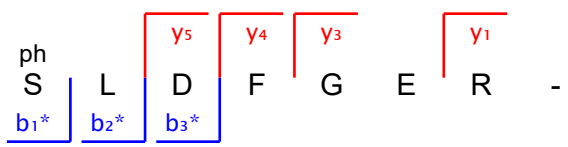

Raw file Scan Method Score m/z  
 sys\_00\_3short 16439 FTMS; HCD 52.58 602.74

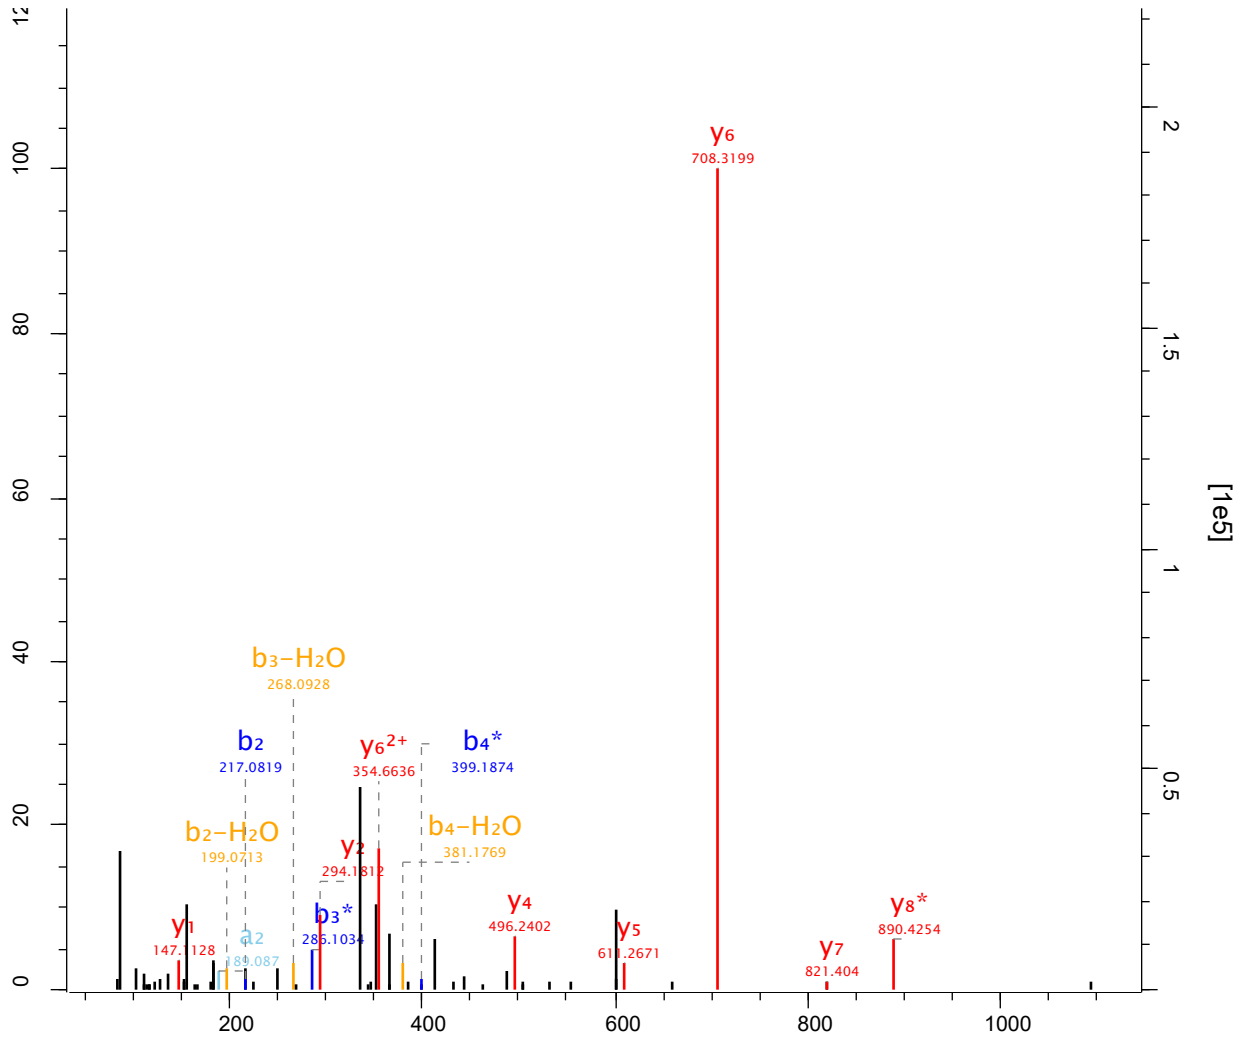

- E S y<sub>8</sub>\* ph S L P y<sub>7</sub> y<sub>6</sub> y<sub>5</sub> y<sub>4</sub> D y<sub>2</sub> y<sub>1</sub> K -

b<sub>2</sub> b<sub>3</sub>\* b<sub>4</sub>\*

Raw file Scan Method Score m/z  
 sys\_00\_3short 16535 FTMS; HCD 218.83 750.33

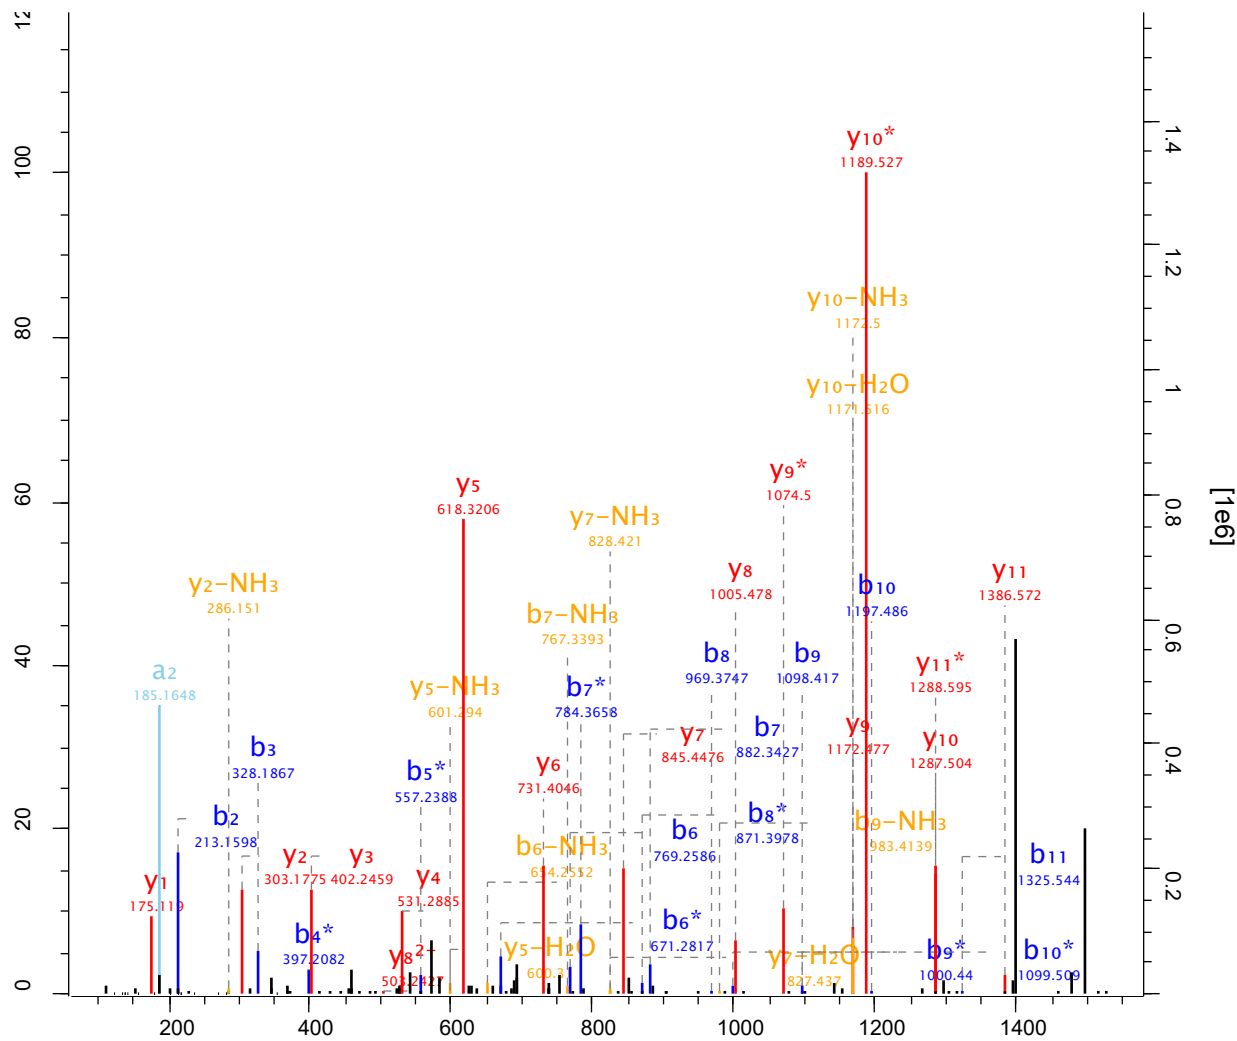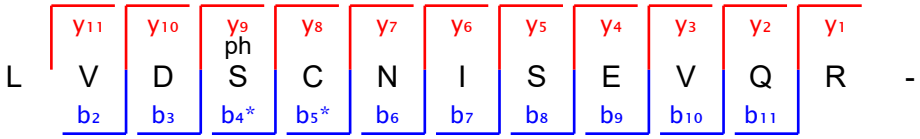

Raw file Scan Method Score m/z  
 sys\_00\_3short 16599 FTMS; HCD 70.2 702.83

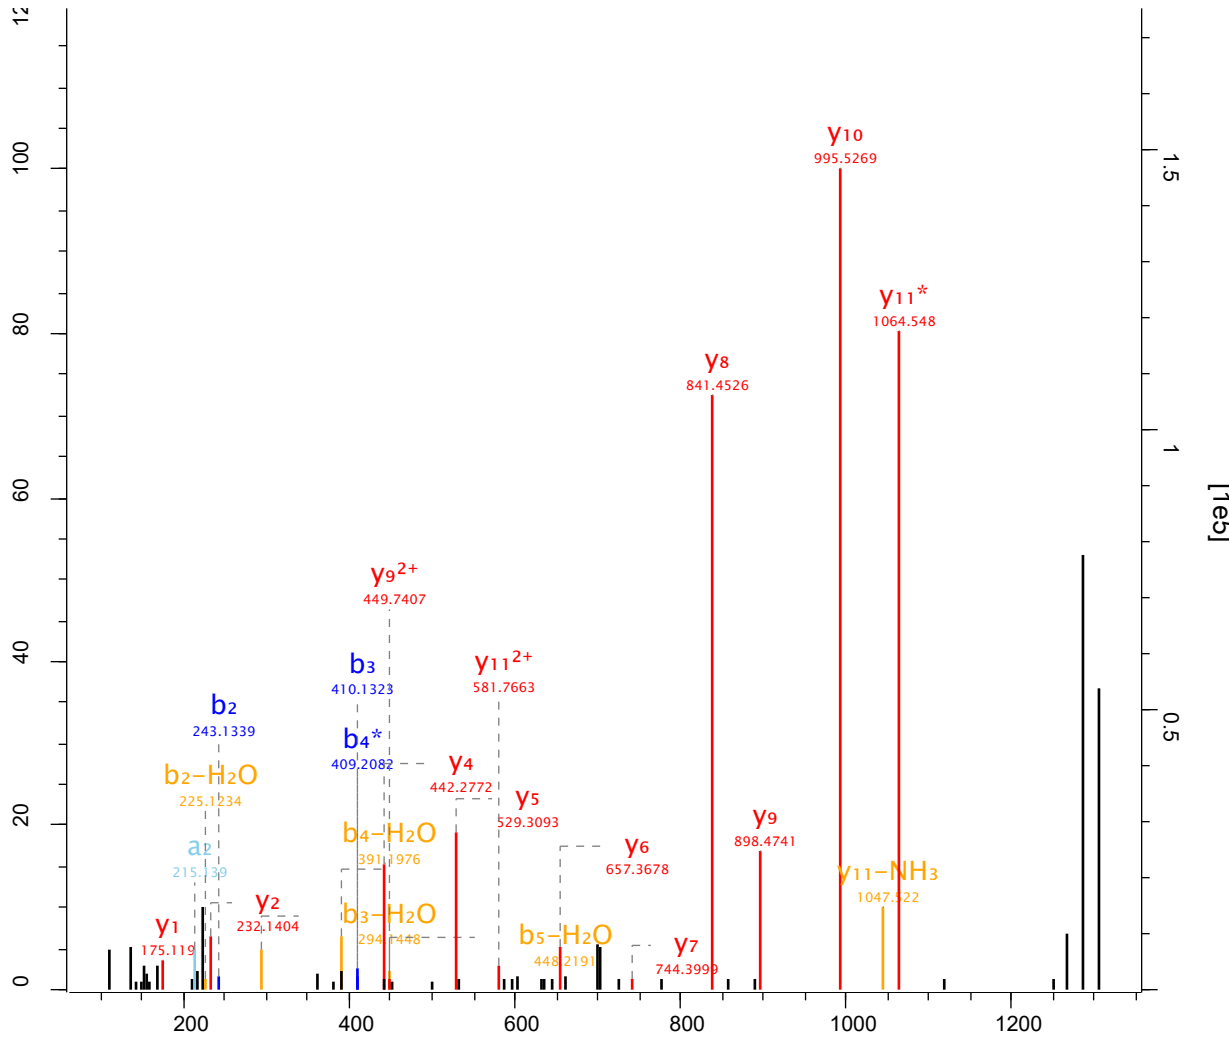

- E L S P G P S Q S P L G R -

b<sub>2</sub>
y<sub>11</sub><sup>\*</sup>  
ph  
S
b<sub>3</sub>
b<sub>4</sub><sup>\*</sup>
y<sub>10</sub>
y<sub>9</sub>
y<sub>8</sub>
y<sub>7</sub>
y<sub>6</sub>
y<sub>5</sub>
y<sub>4</sub>
y<sub>2</sub>
y<sub>1</sub>

Raw file Scan Method Score m/z  
 sys\_00\_3short 16873 FTMS; HCD 75.55 748.36

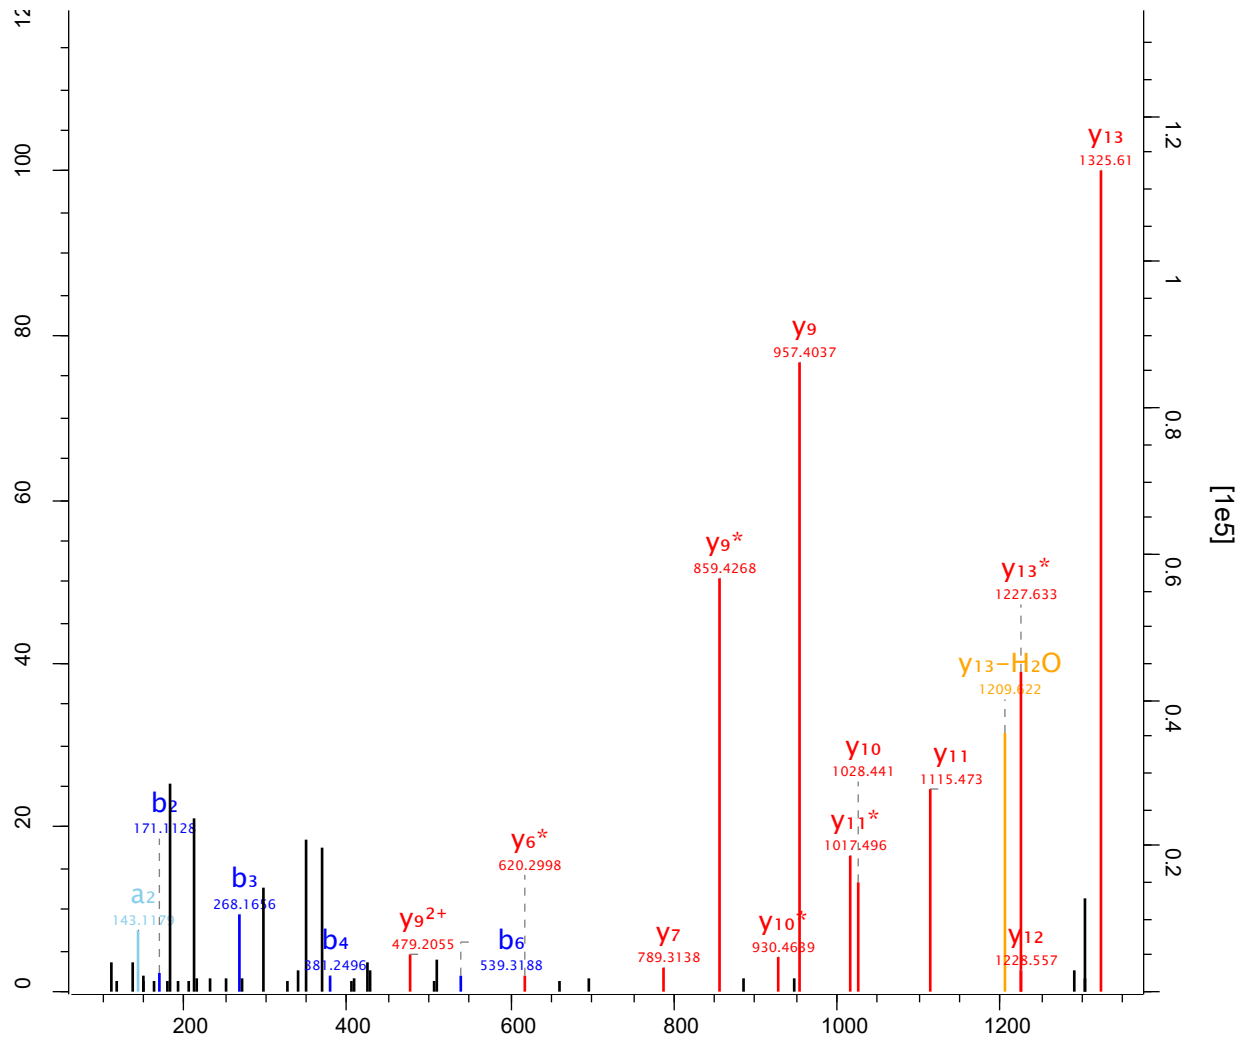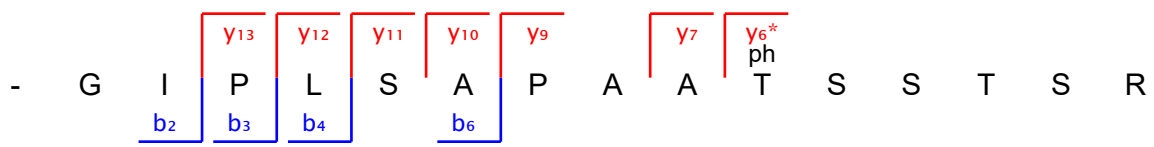

Raw file Scan Method Score m/z  
 sys\_00\_3short 16971 FTMS; HCD 79.49 740.33

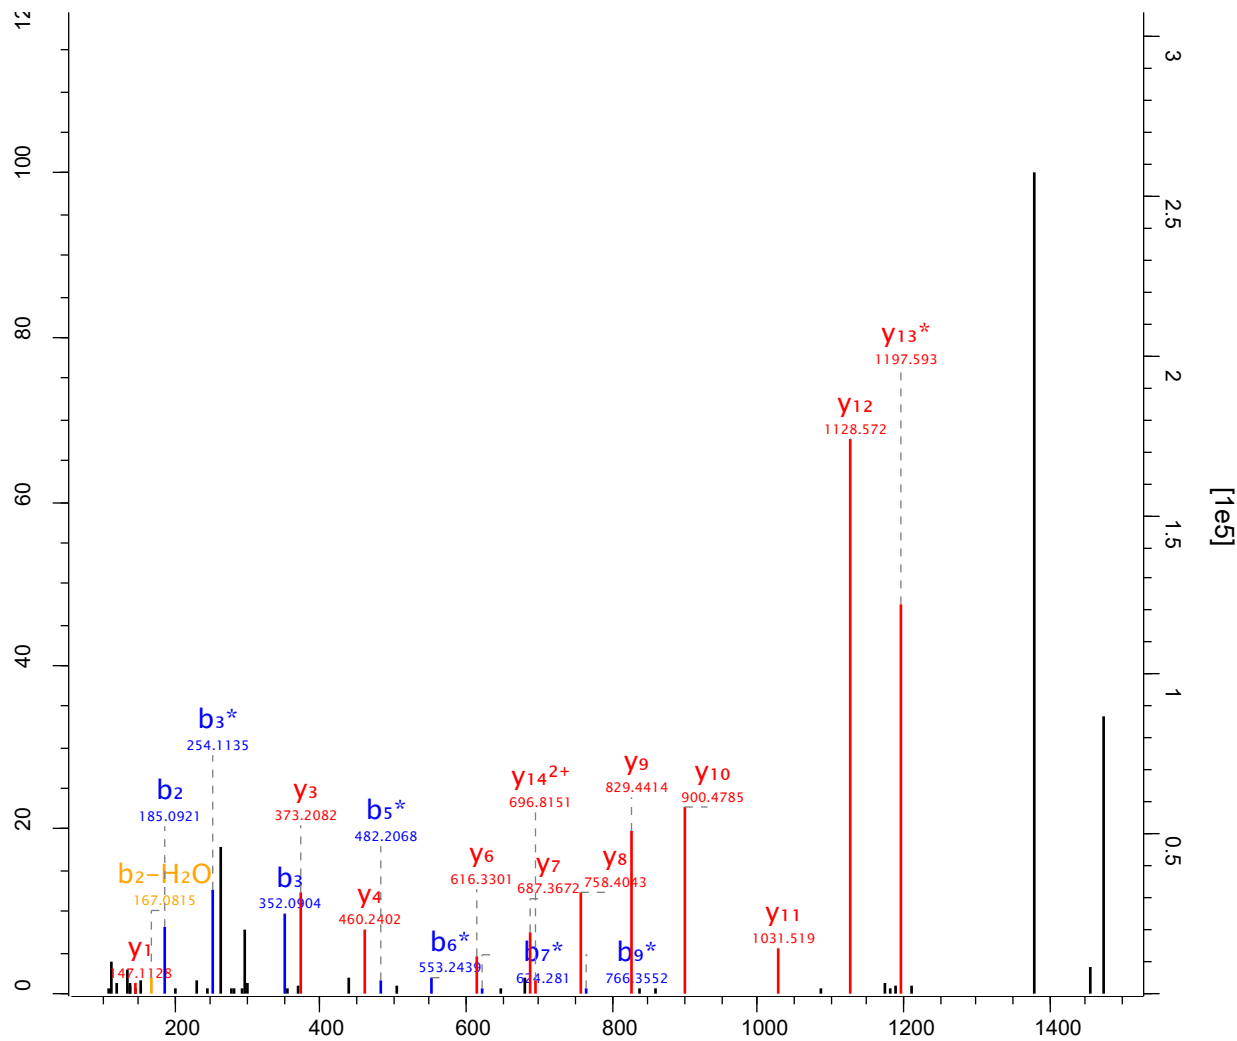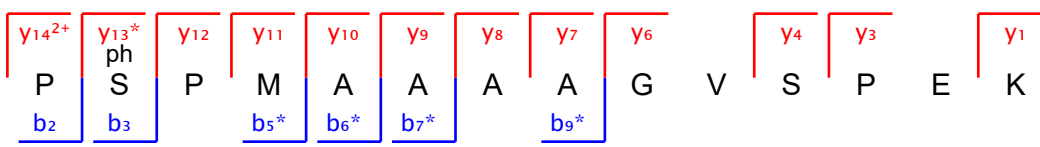

Raw file Scan Method Score m/z  
 sys\_00\_3short 17196 FTMS; HCD 85.84 606.77

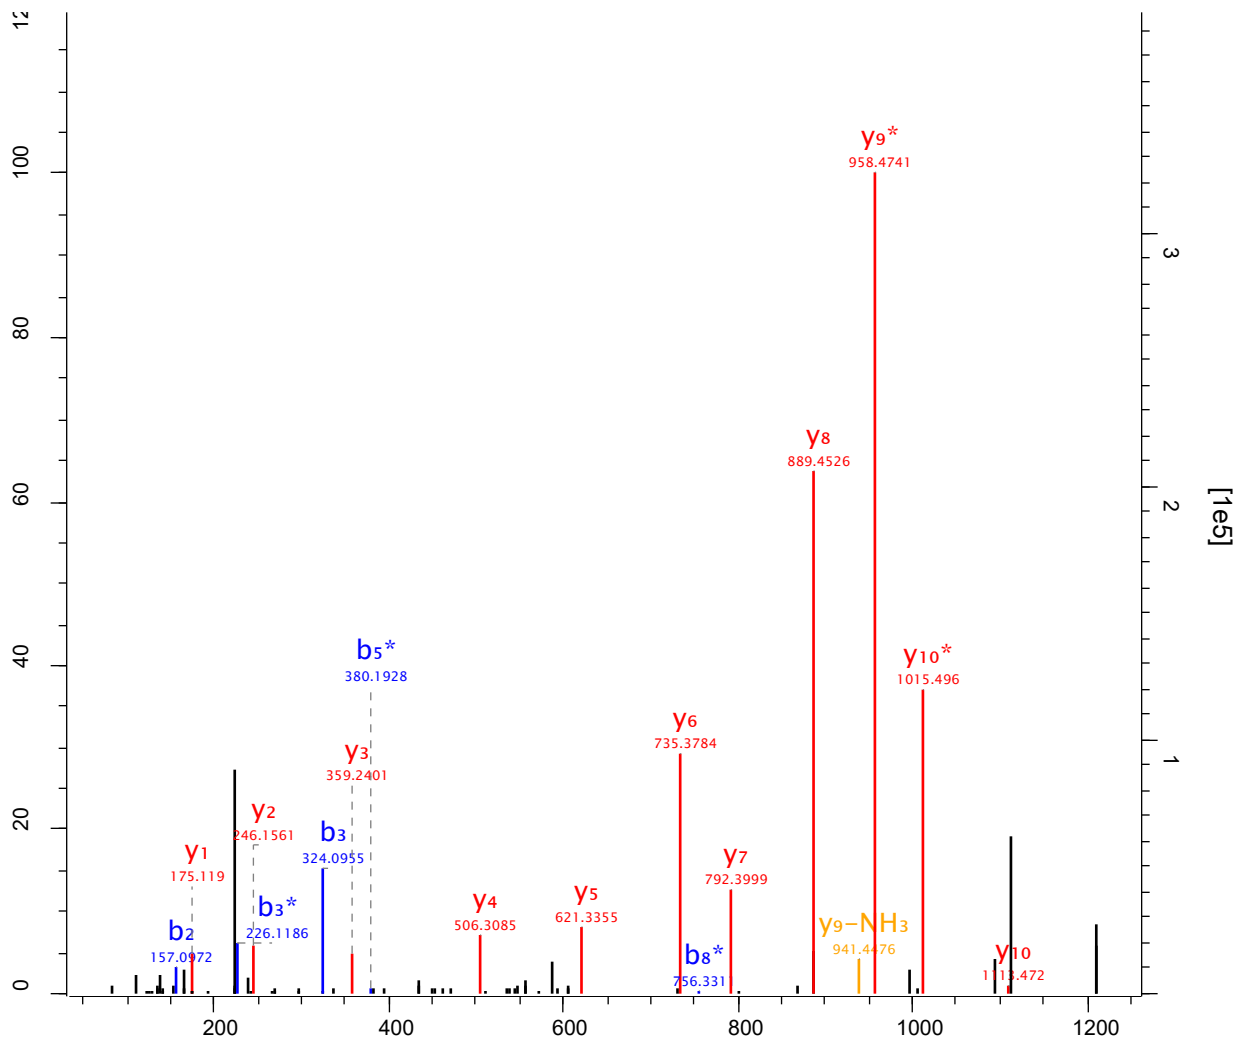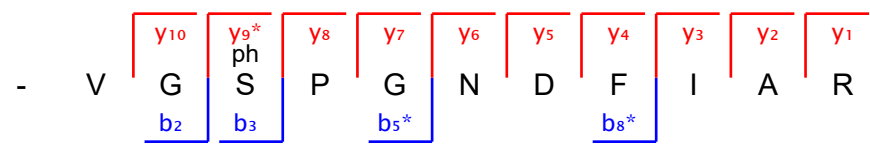

| Raw file      | Scan  | Method    | Score | m/z    |
|---------------|-------|-----------|-------|--------|
| sys_00_3short | 17246 | FTMS; HCD | 40.95 | 887.41 |

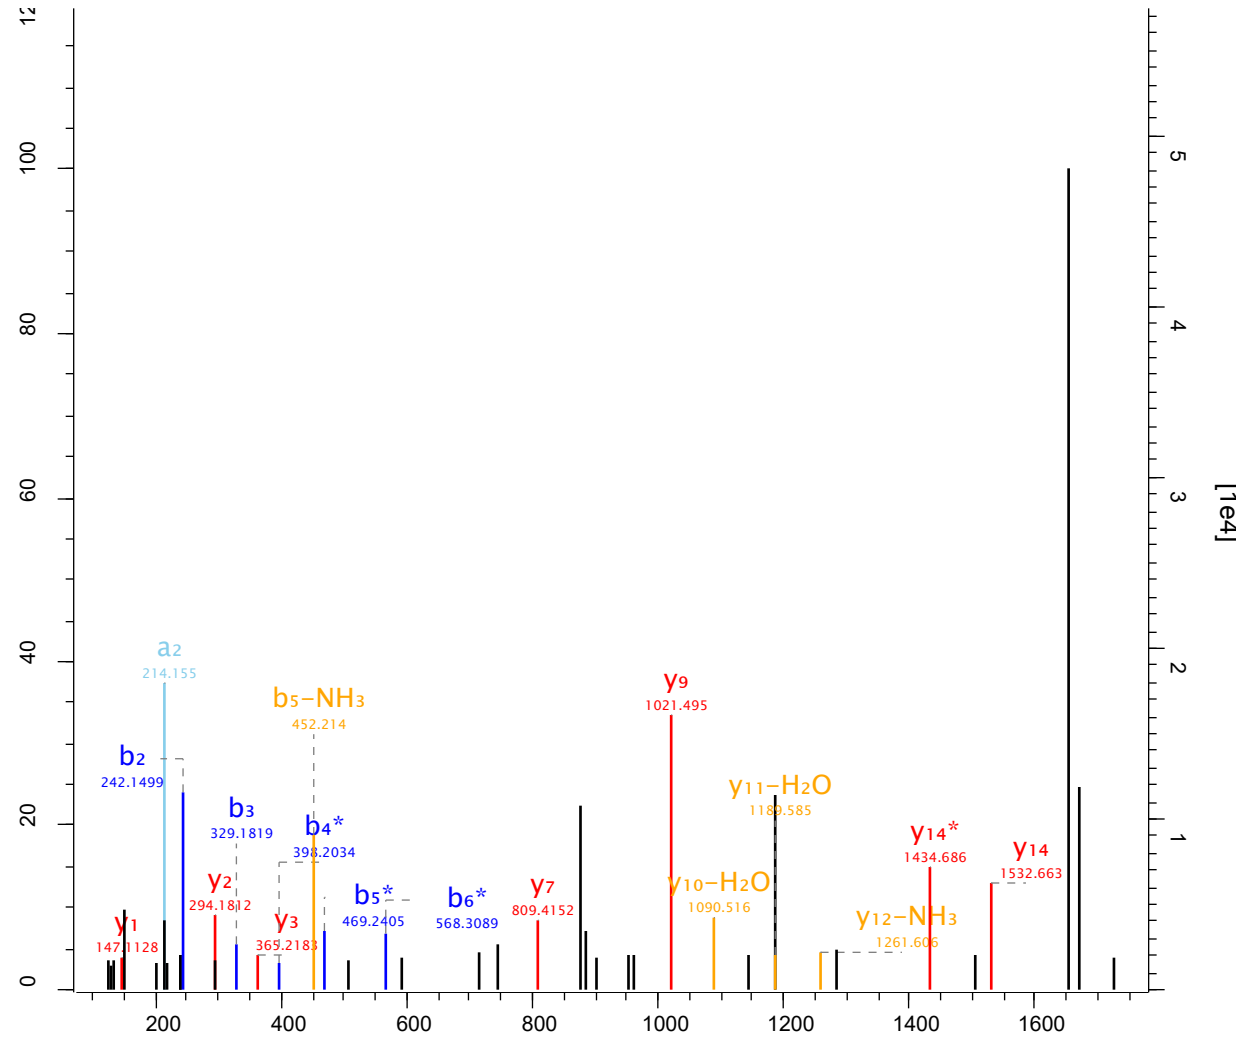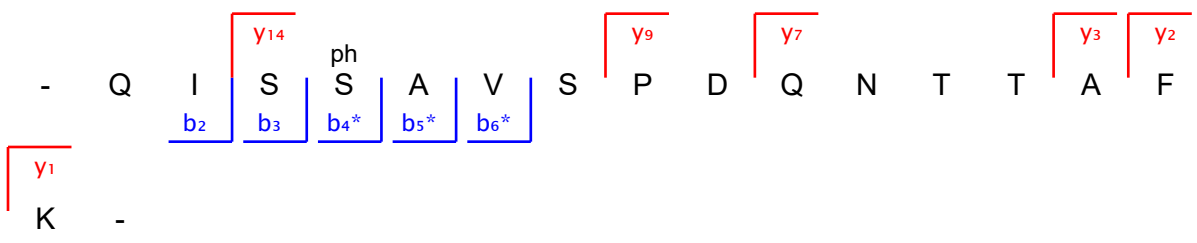



Raw file Scan Method Score m/z  
 sys\_00\_3short 17323 FTMS; HCD 51.45 573.74

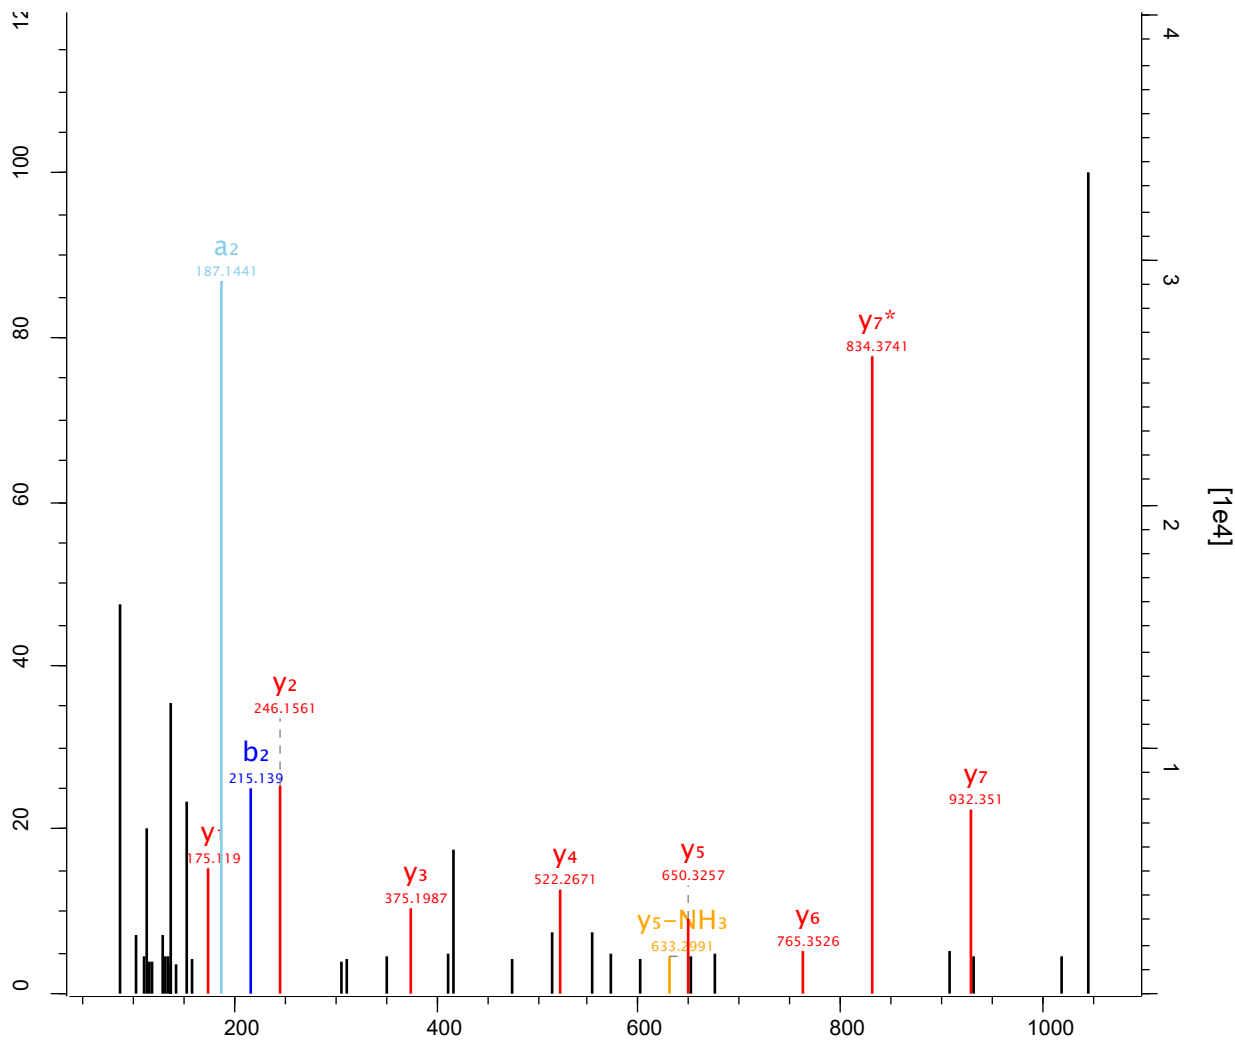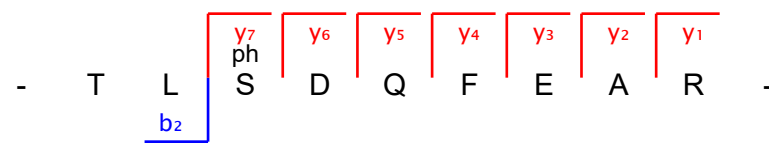

Raw file Scan Method Score m/z  
 sys\_00\_3short 17561 FTMS; HCD 98.59 578.76

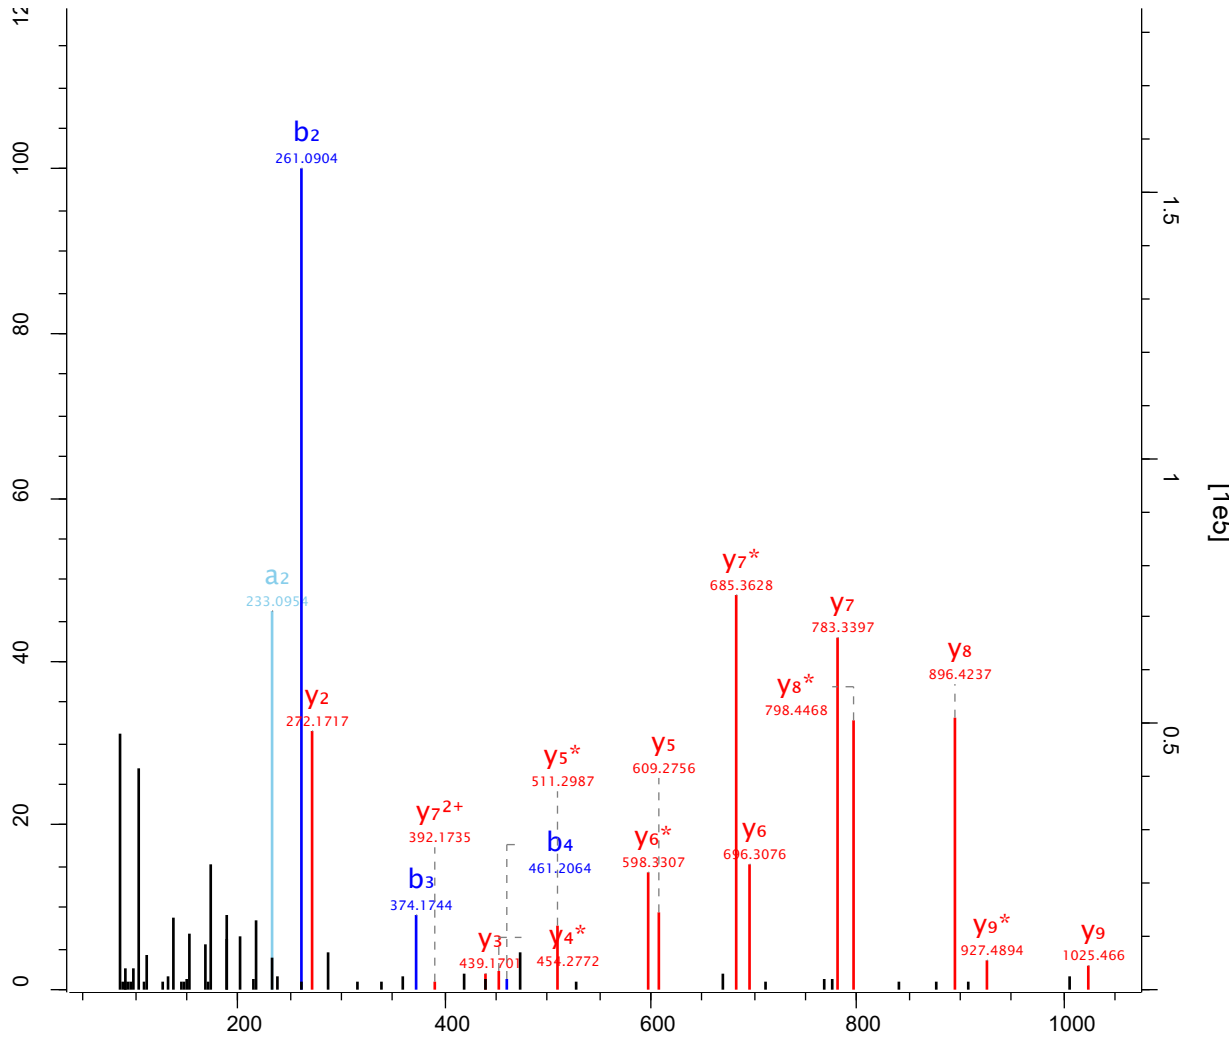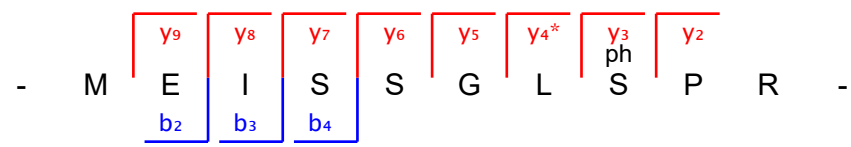

Raw file Scan Method Score m/z  
 sys\_00\_3short 17610 FTMS; HCD 55.72 651.77

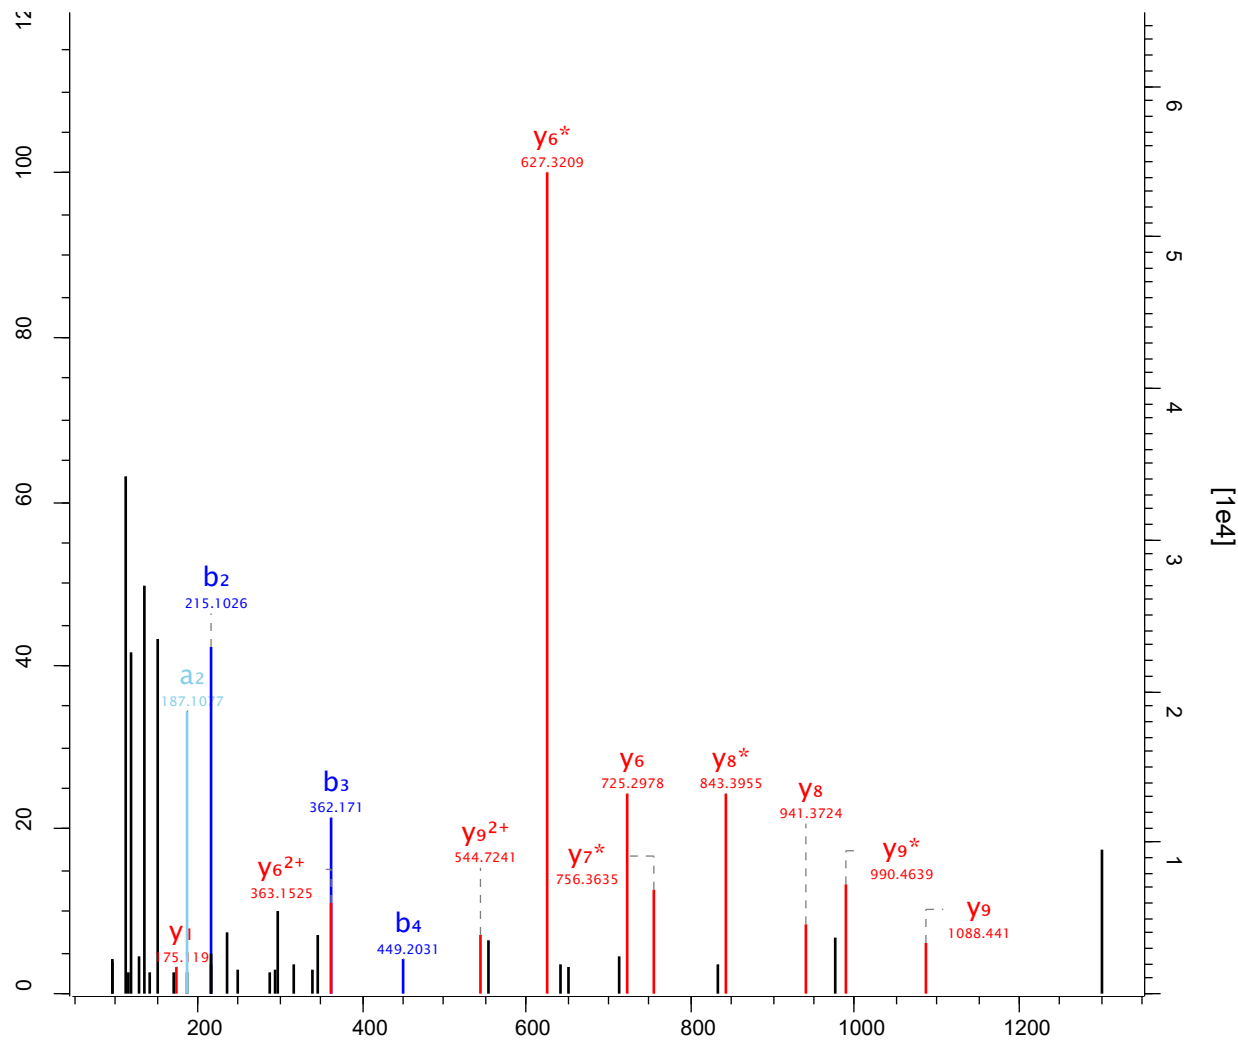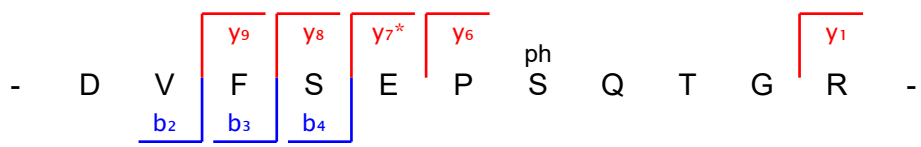

Raw file Scan Method Score m/z  
 sys\_00\_3short 17639 FTMS; HCD 157.98 838.85

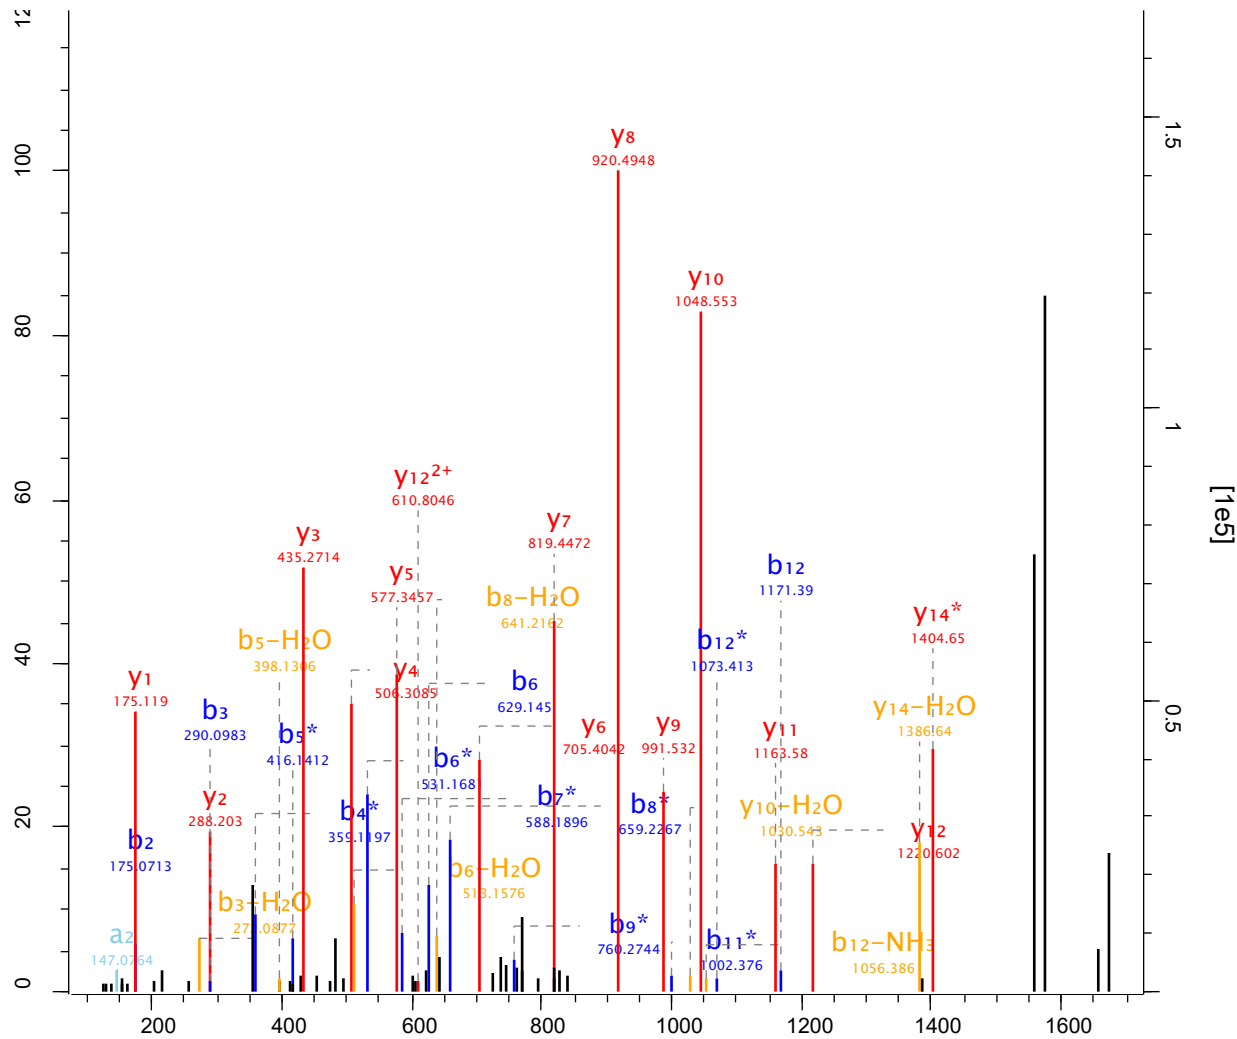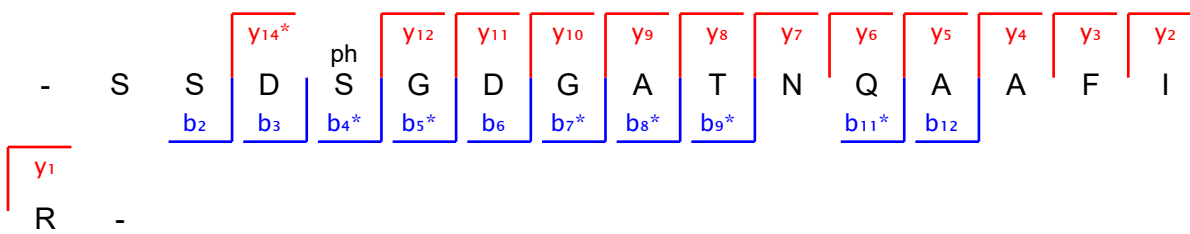

Raw file Scan Method Score m/z  
 sys\_00\_3short 17705 FTMS; HCD 70.03 515.22

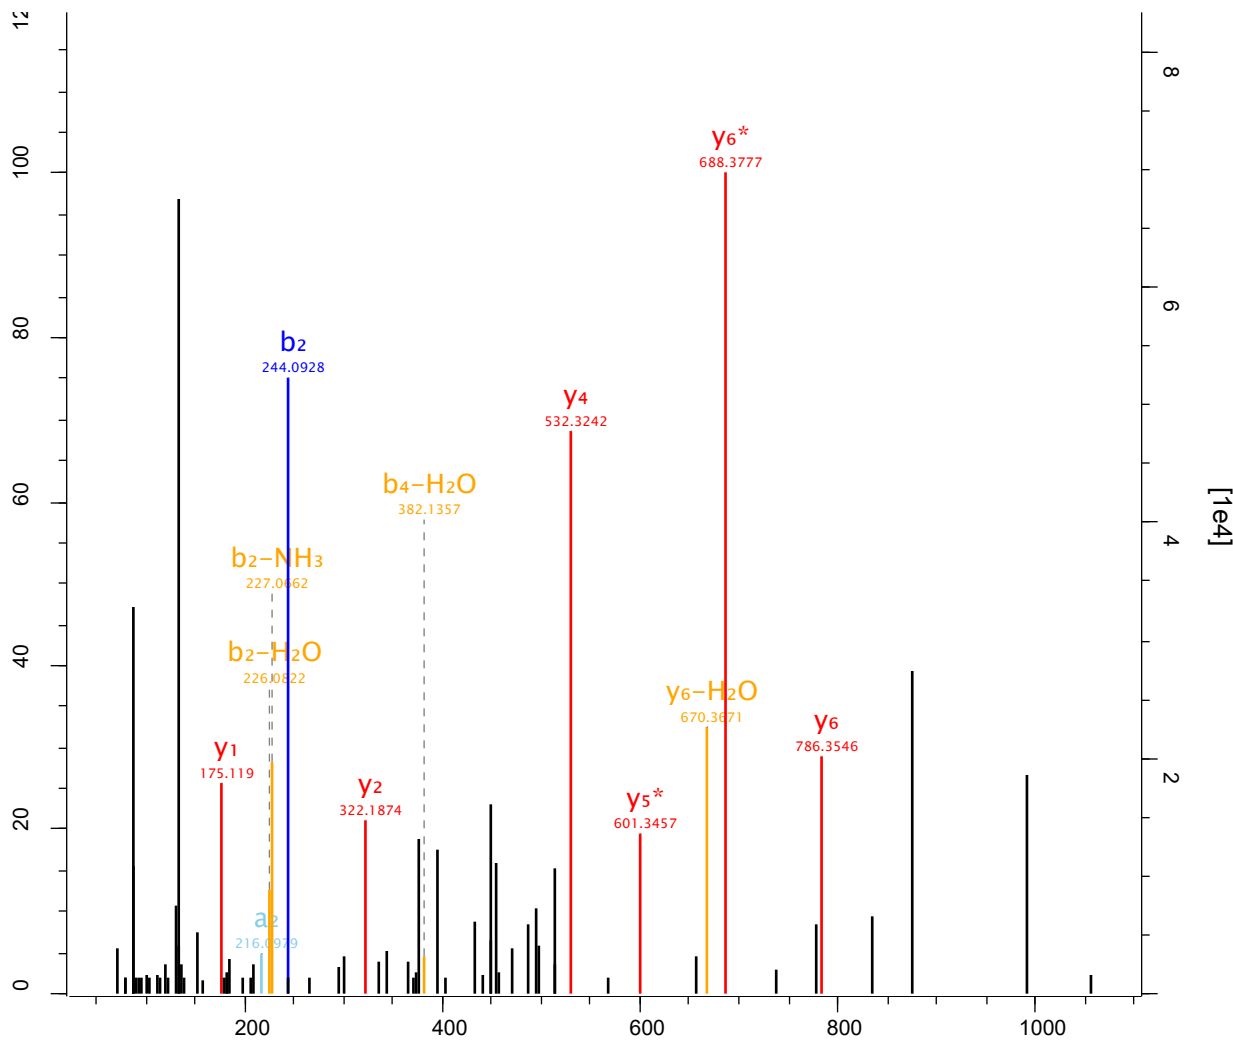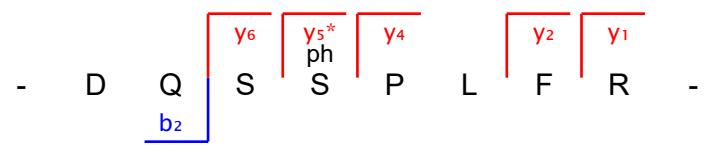

Raw file Scan Method Score m/z  
 sys\_00\_3short 17742 FTMS; HCD 143.25 572.76

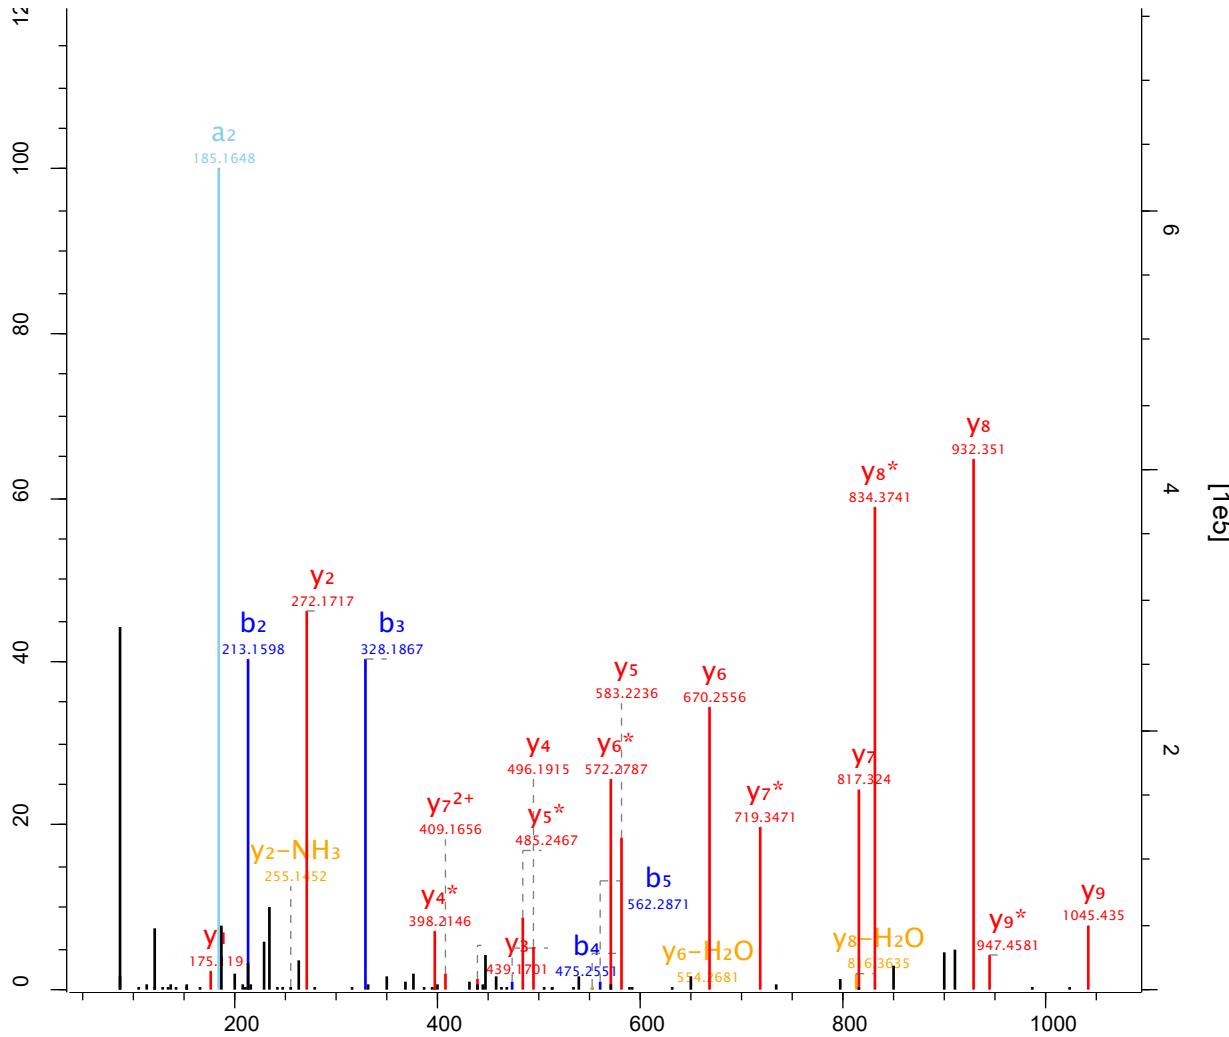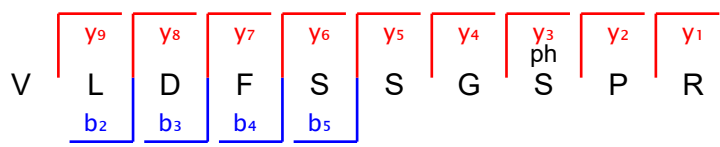

Raw file Scan Method Score m/z  
 sys\_00\_3short 17750 FTMS; HCD 73.93 648.3

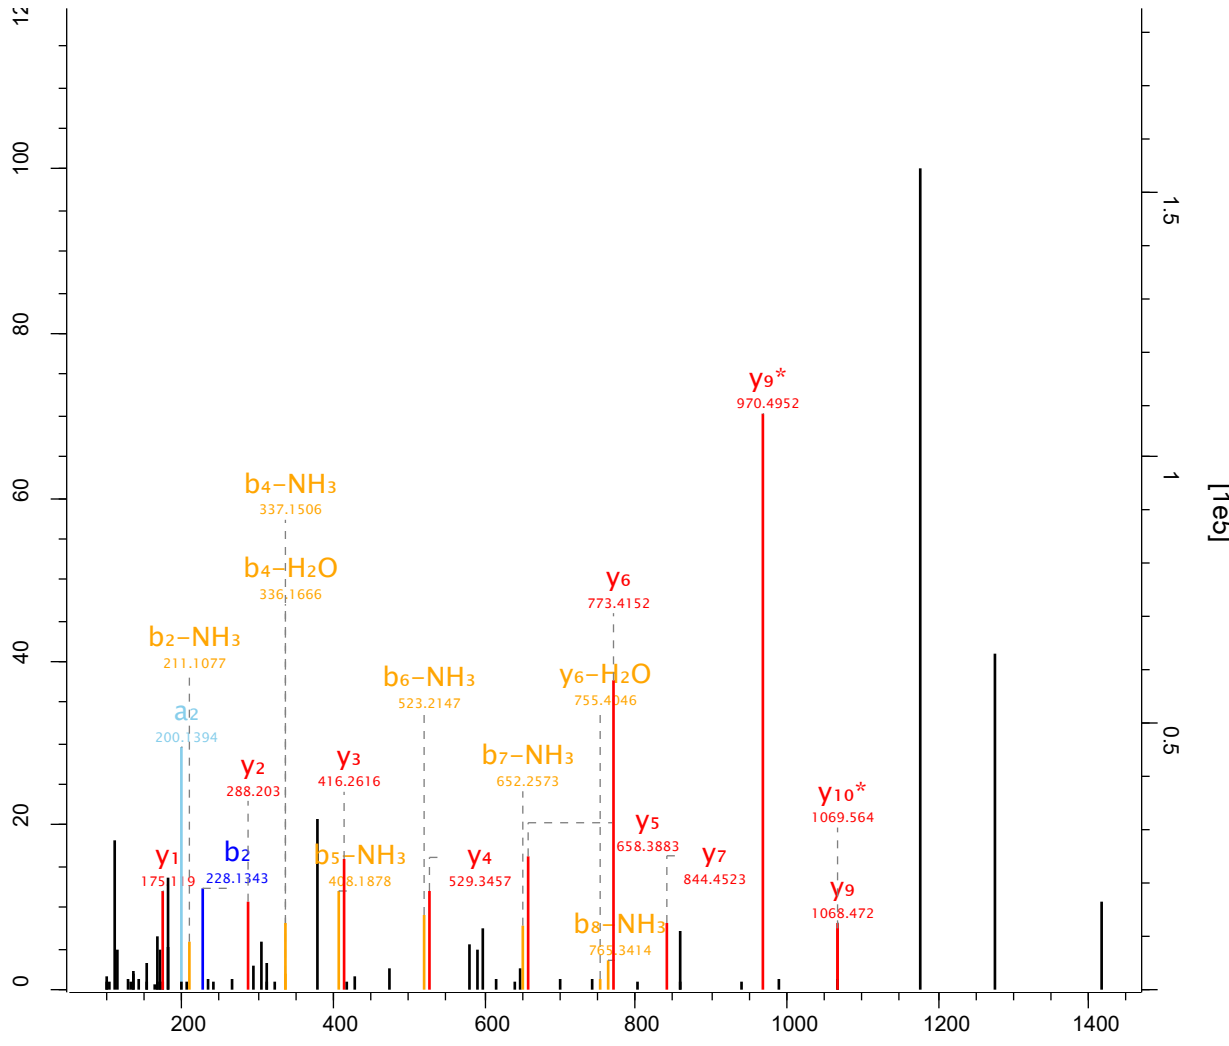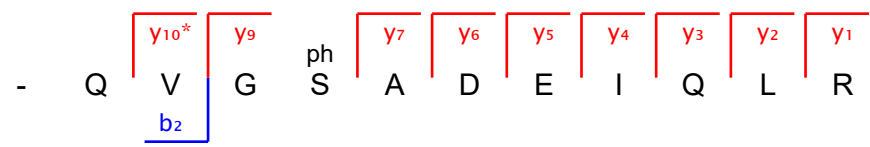

Raw file Scan Method Score m/z  
 sys\_00\_3short 17870 FTMS; HCD 84.36 525.78

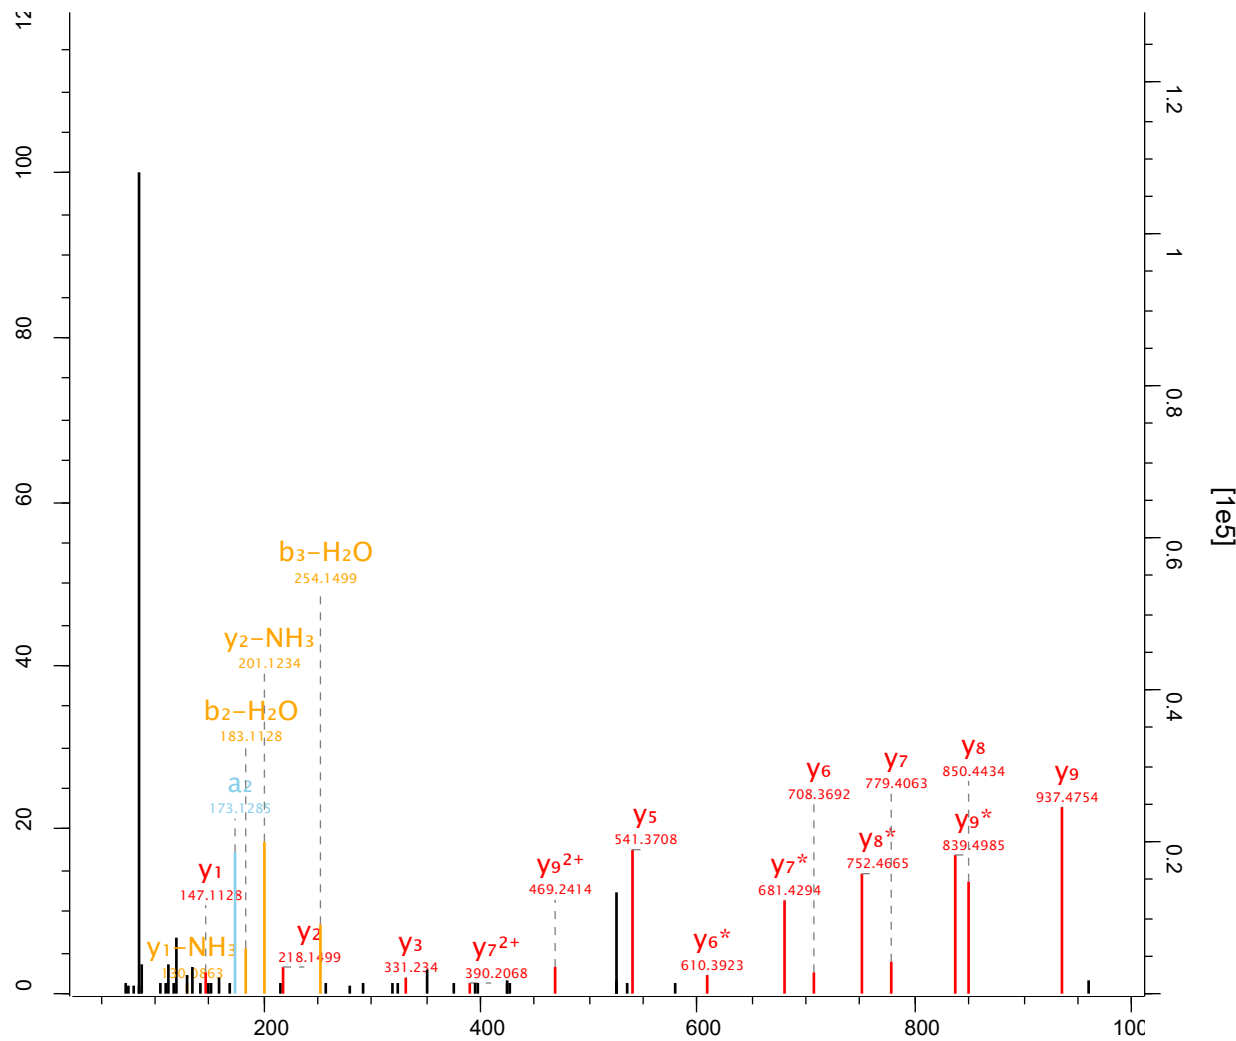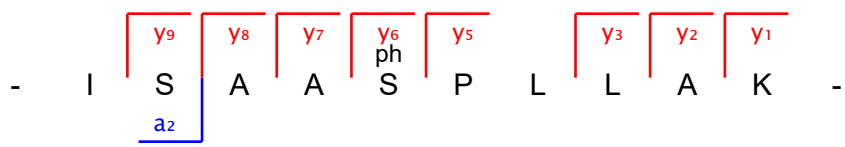



Raw file Scan Method Score m/z  
 sys\_00\_3short 17947 FTMS; HCD 130.15 607.74

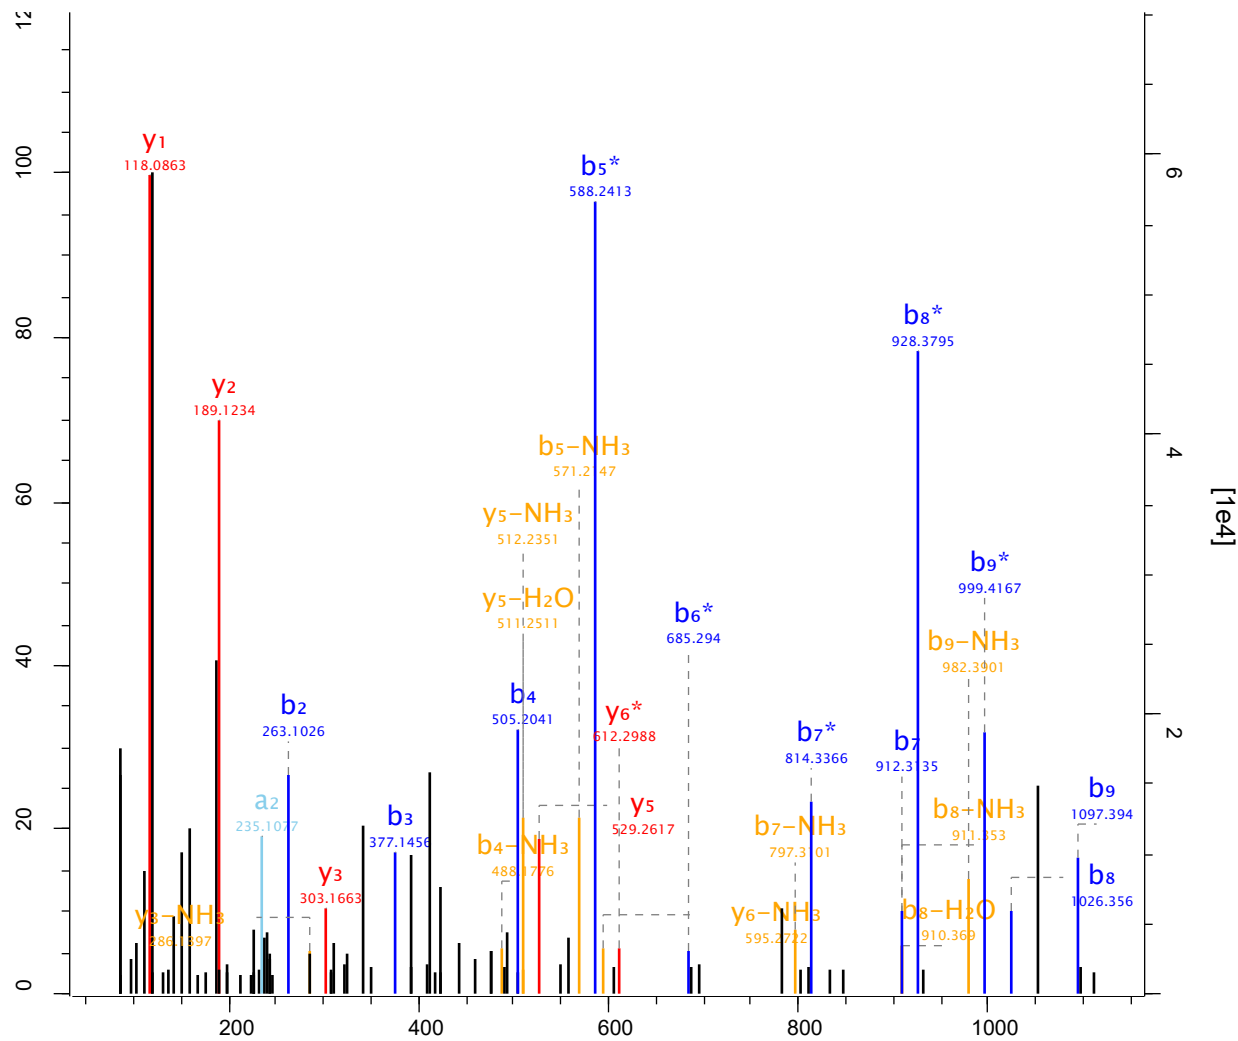

- F D N Q T P E N A V -  
 b2 b3 b4 b5\* b6\* b7 b8 b9

Raw file Scan Method Score m/z  
 sys\_00\_3short 18233 FTMS; HCD 60.16 581.3

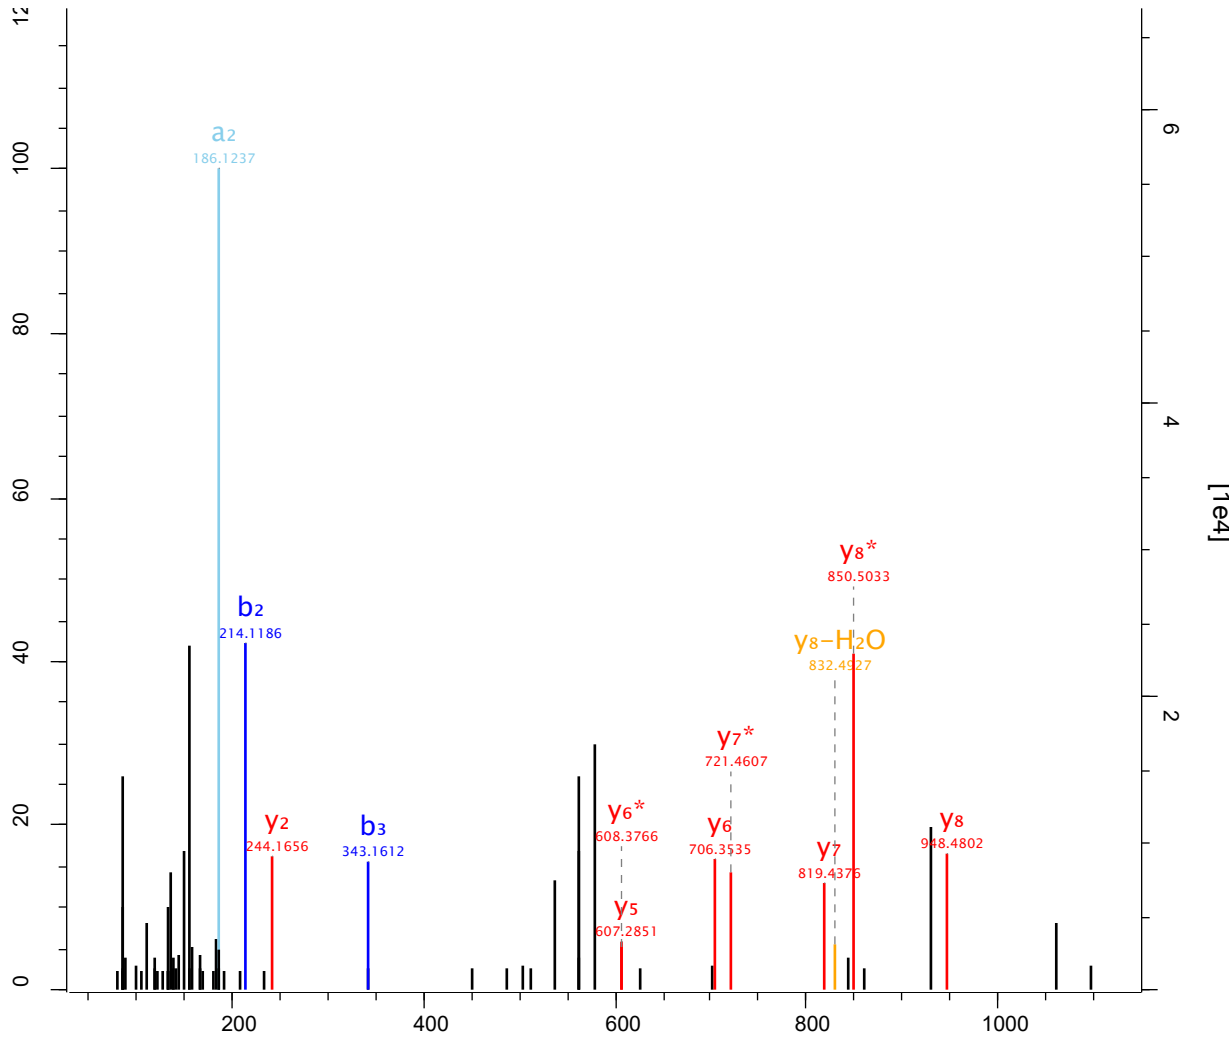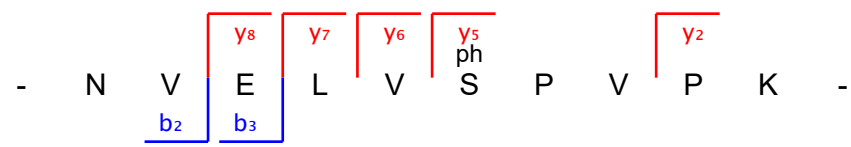

Raw file Scan Method Score m/z  
 sys\_00\_3short 18297 FTMS; HCD 150.11 657.79

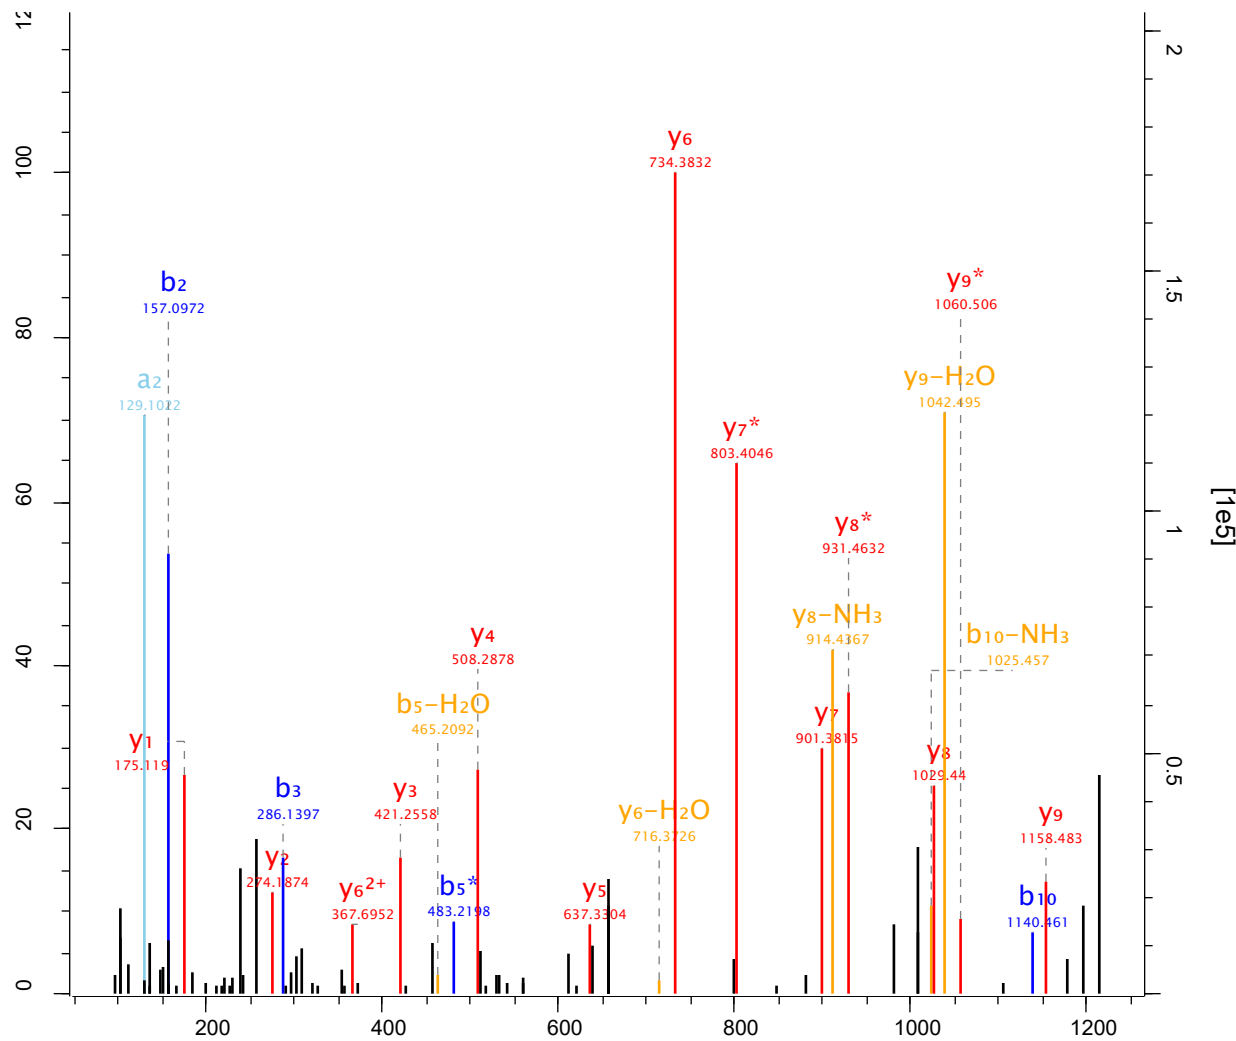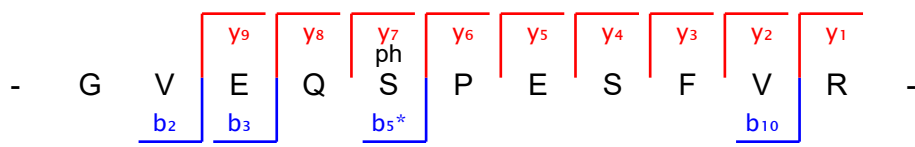

Raw file Scan Method Score m/z  
 sys\_00\_3short 18580 FTMS; HCD 49.33 562.76

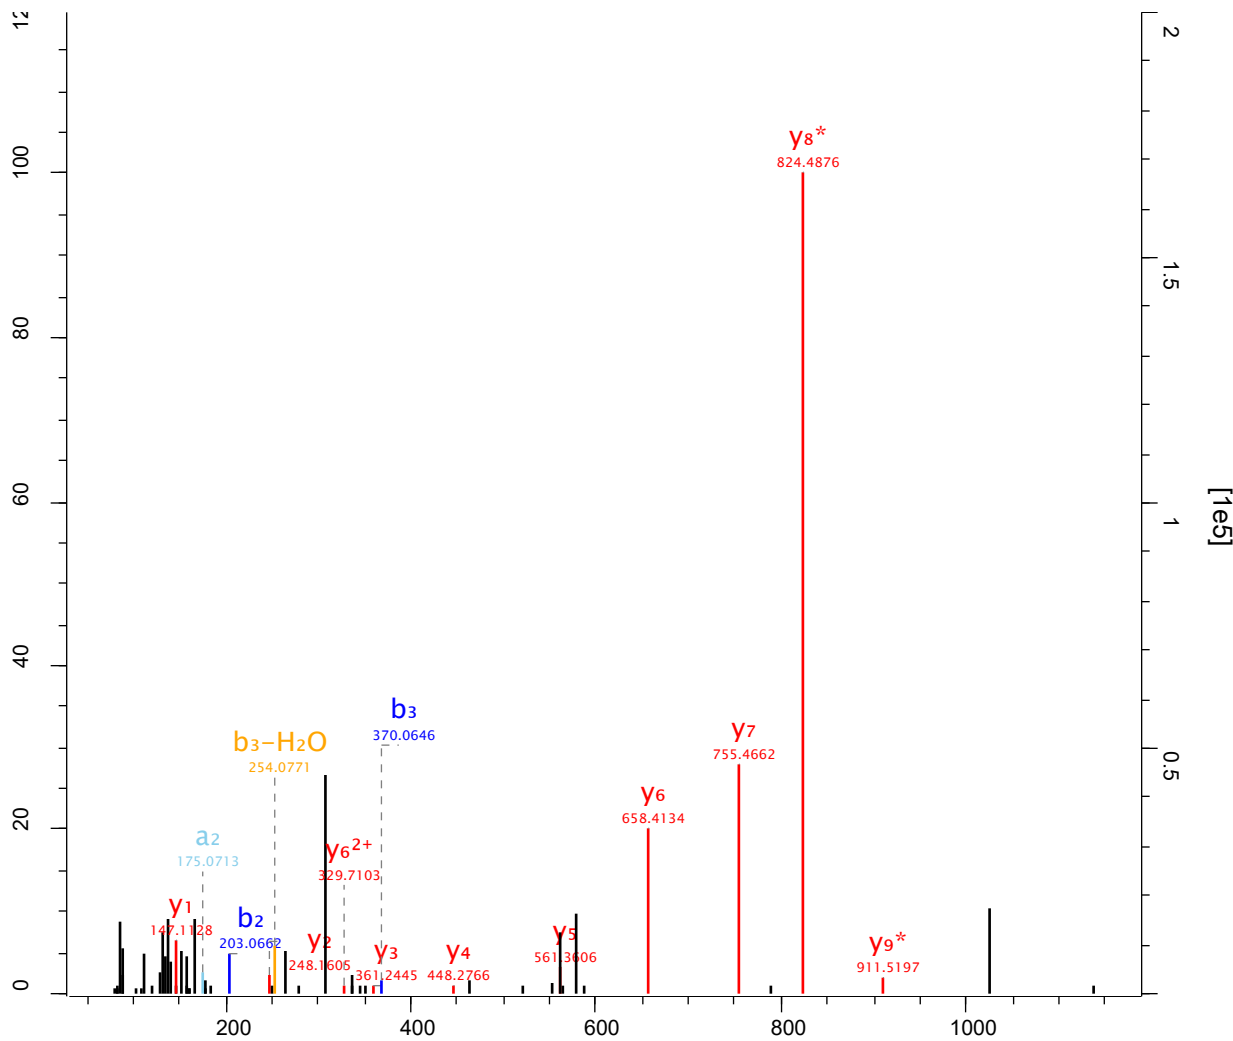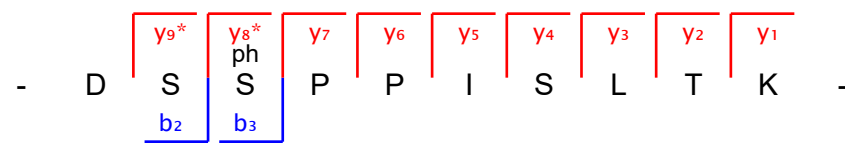

Raw file Scan Method Score m/z  
 sys\_00\_3short 18685 FTMS; HCD 98.57 775.36

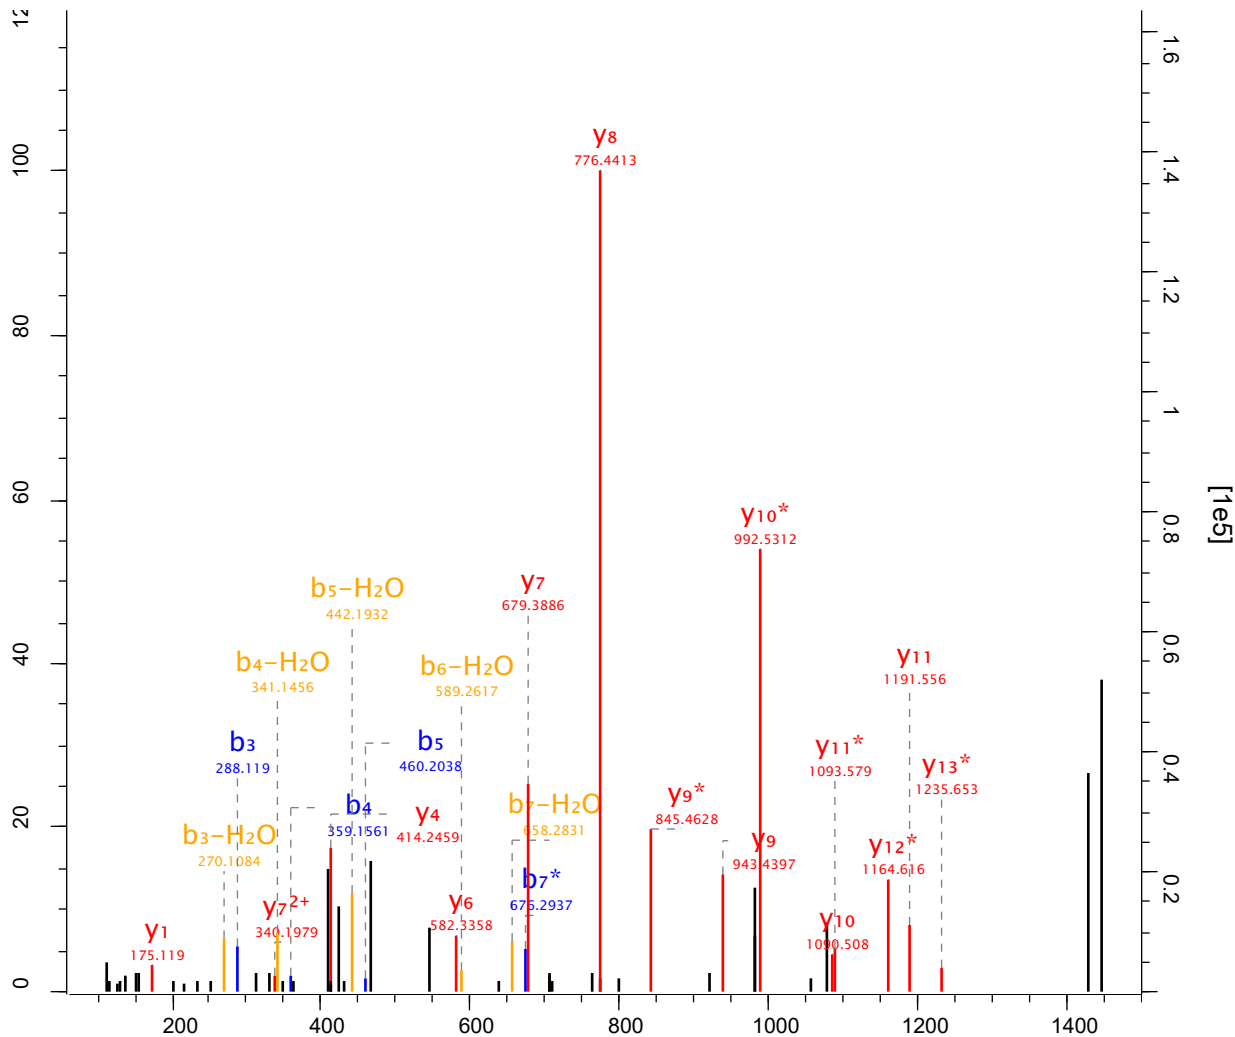

- E S A A T F S P P P A P A A R

y13\*
y12\*
y11
y10
y9  
ph
y8
y7
y6
y4
y1

b3
b4
b5
b7\*

Raw file Scan Method Score m/z  
 sys\_00\_3short 18691 FTMS; HCD 59.71 602.77

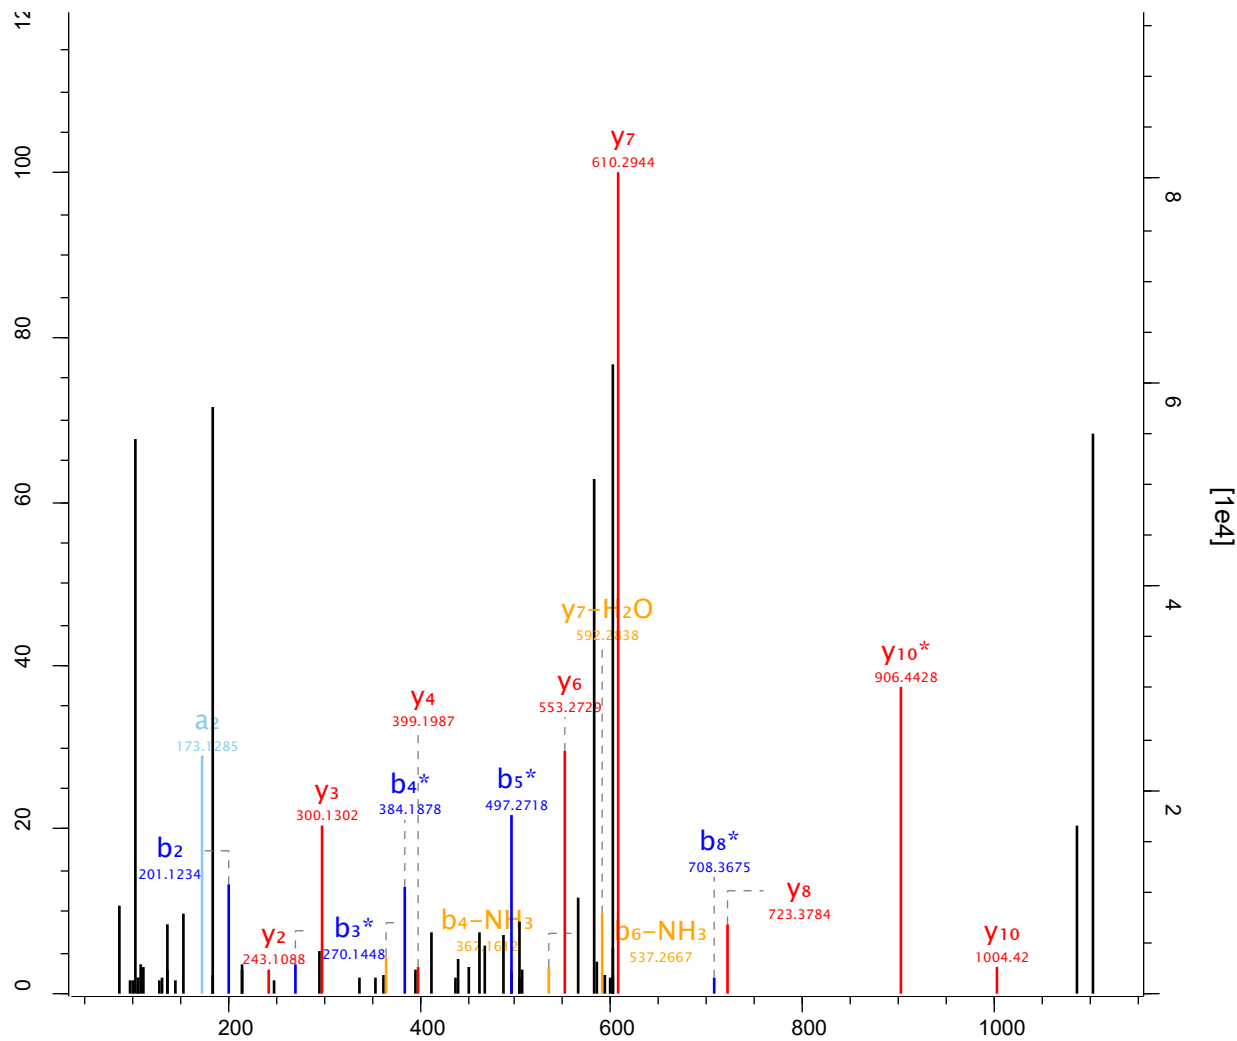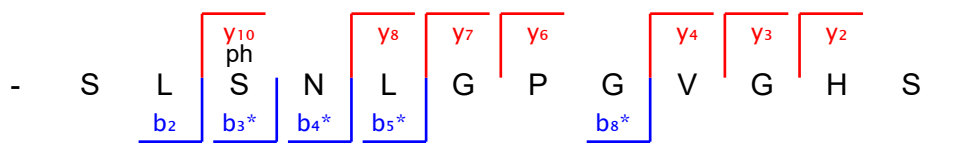

| Raw file      | Scan | Method    | Score | m/z    |
|---------------|------|-----------|-------|--------|
| sys_00_3short | 1871 | FTMS; HCD | 70.81 | 562.75 |

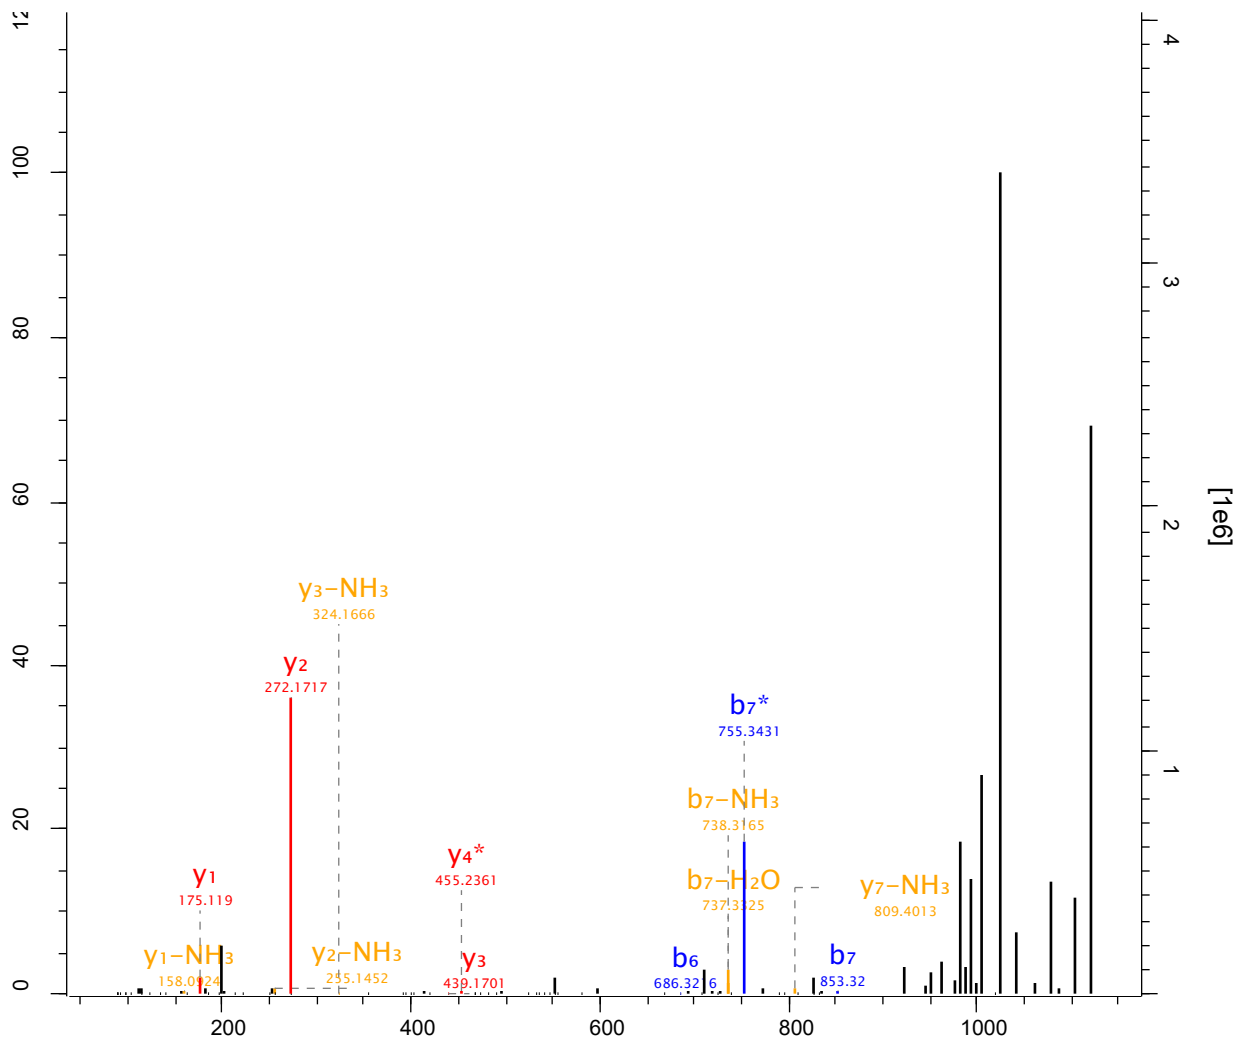

- E A N T R y4\* N y3  
ph S y2 P y1 R -

b6 b7

Raw file Scan Method Score m/z  
 sys\_00\_3short 19002 FTMS; HCD 62.09 772.87

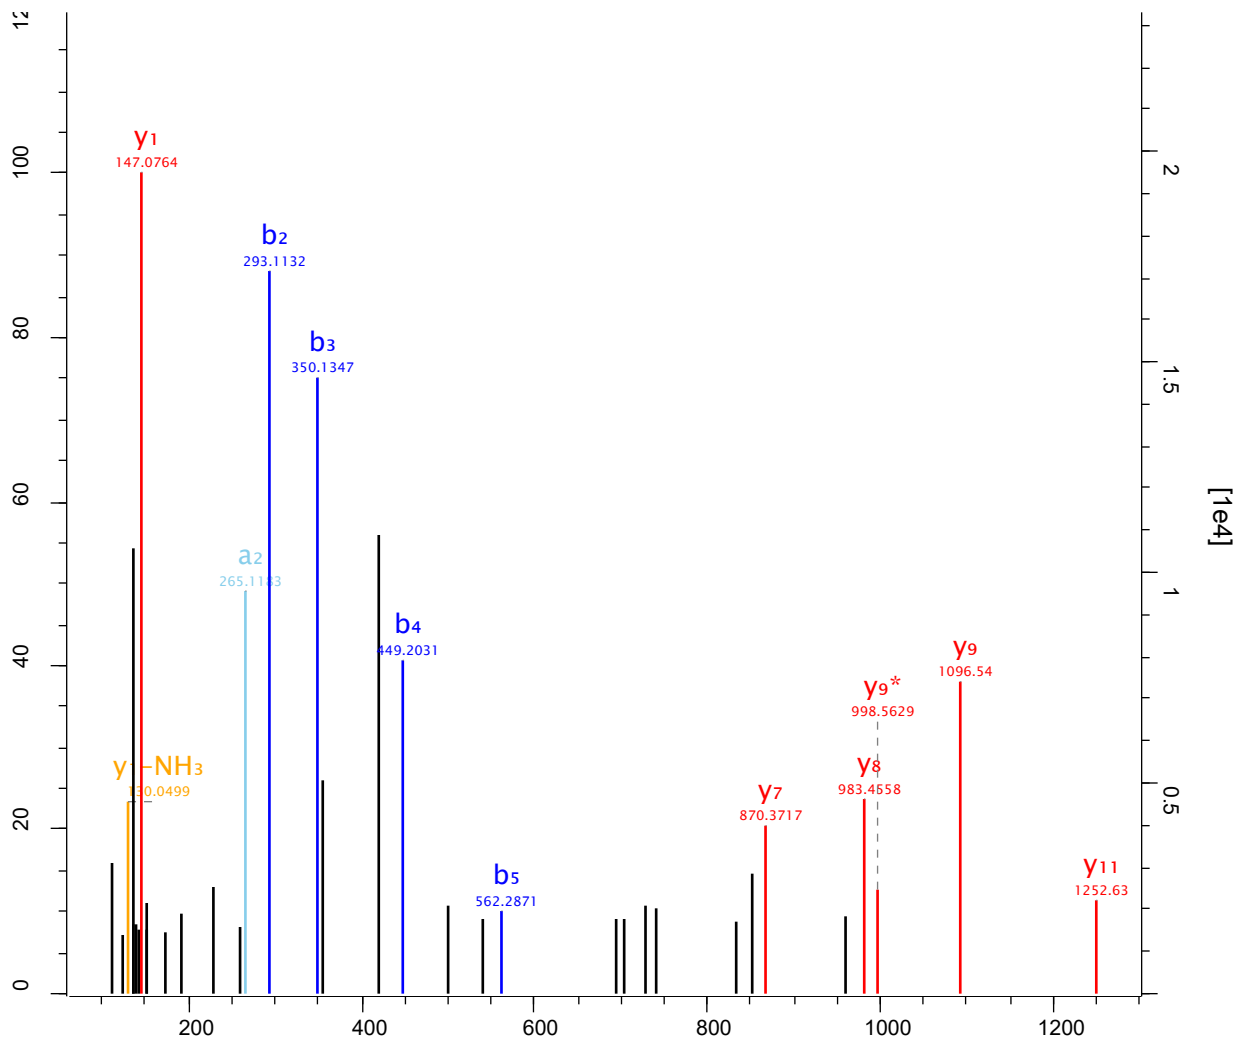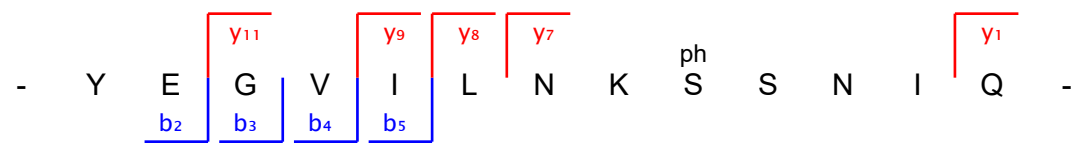



Raw file Scan Method Score m/z  
 sys\_00\_3short 19224 FTMS; HCD 54.26 516.75

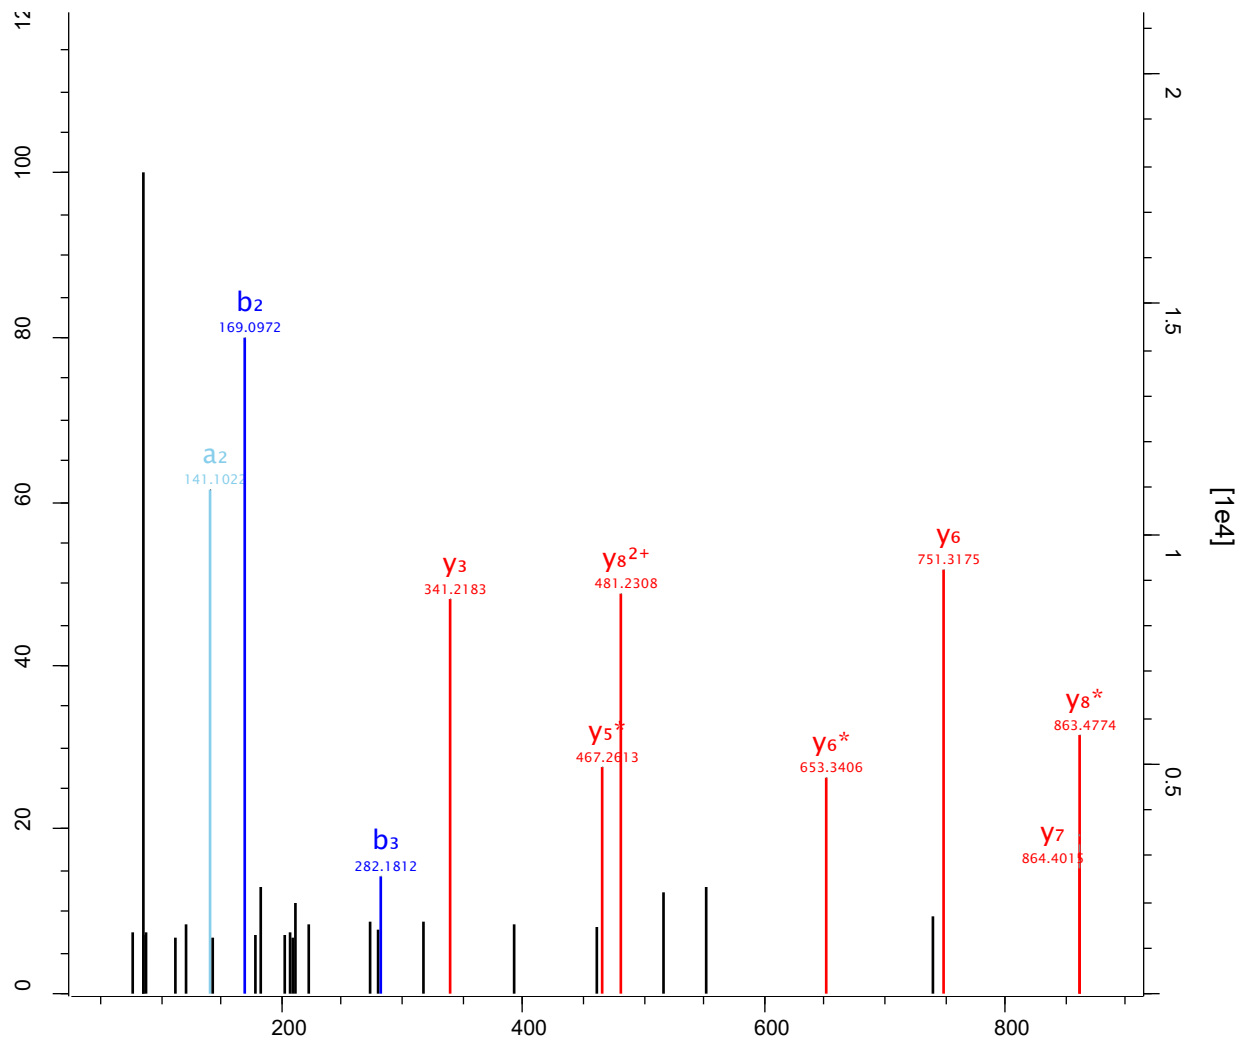

- A P I W G ph S P P K -

b<sub>2</sub>
b<sub>3</sub>
y<sub>8</sub>\*
y<sub>7</sub>
y<sub>6</sub>
y<sub>5</sub>\*
y<sub>3</sub>

Raw file Scan Method Score m/z  
 sys\_00\_3short 19356 FTMS; HCD 149.42 805.36

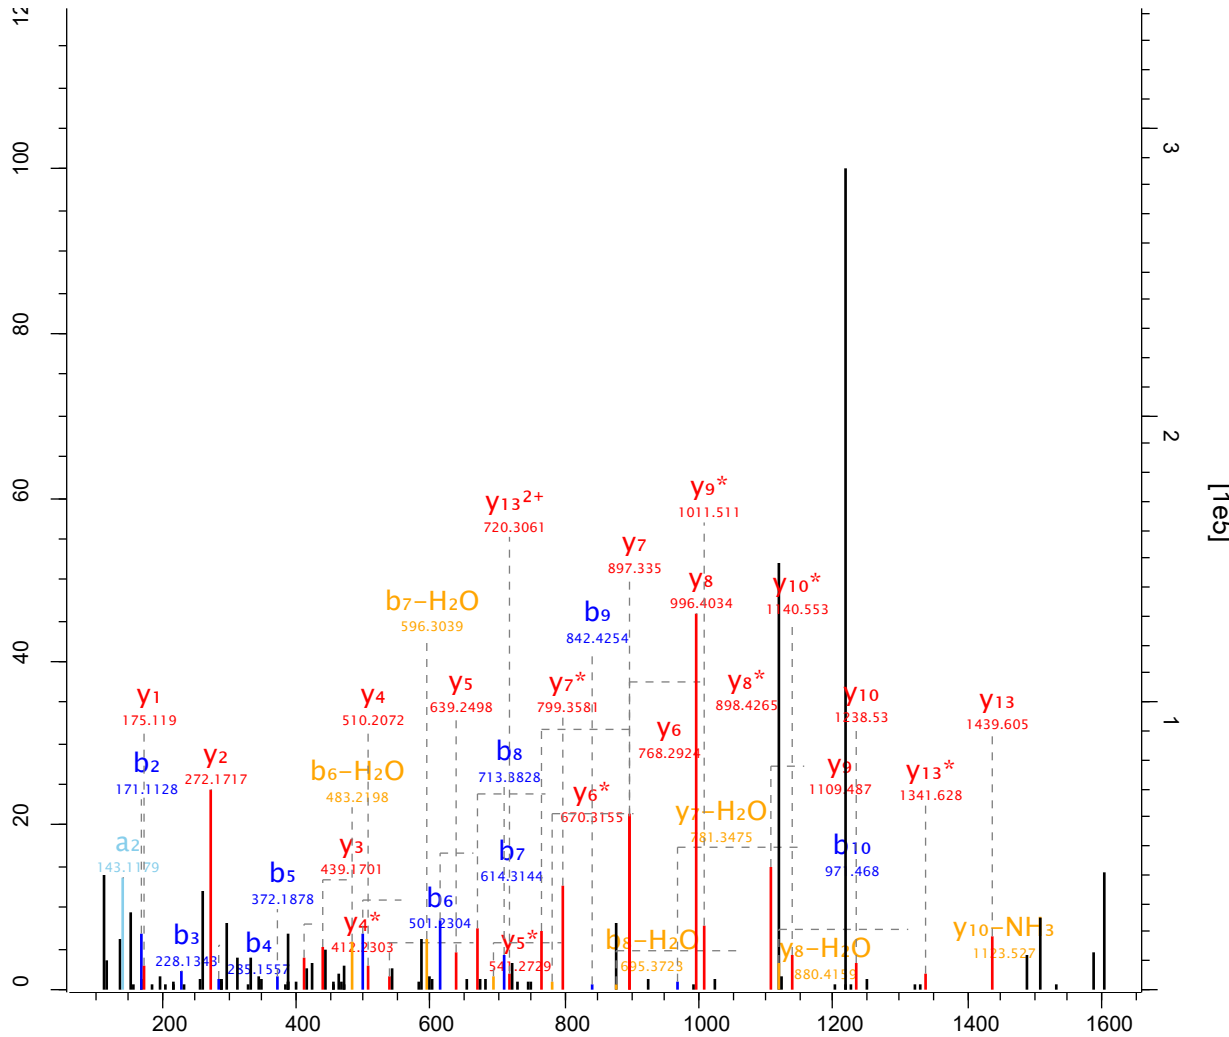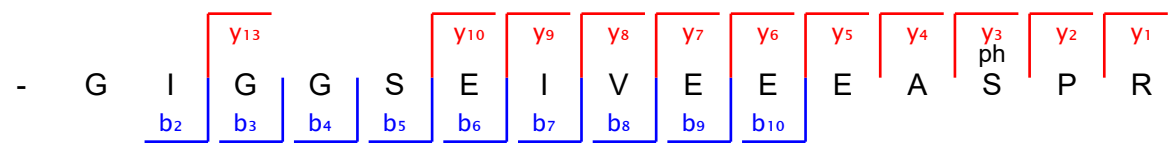

Raw file Scan Method Score m/z  
 sys\_00\_3short 19433 FTMS; HCD 75.06 966.46

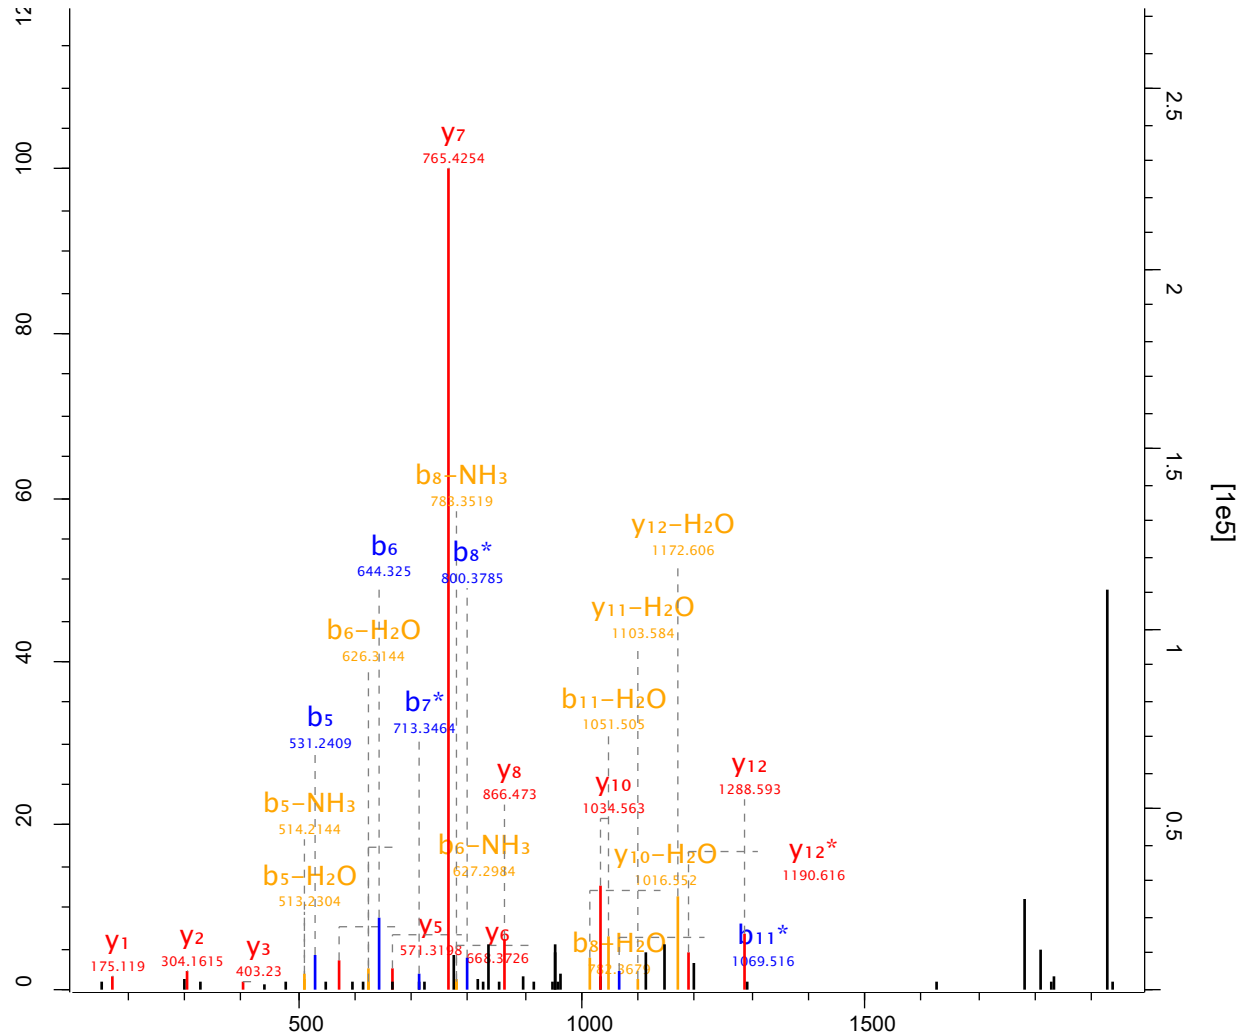

- L S S E N L S S P A T P P P A  
 b5 b6 b7\* b8\* b11\* y3 y2 y1 y12 ph y10 y8 y7 y6 y5

V E R -

Raw file Scan Method Score m/z  
 sys\_00\_3short 19525 FTMS; HCD 74.84 439.72

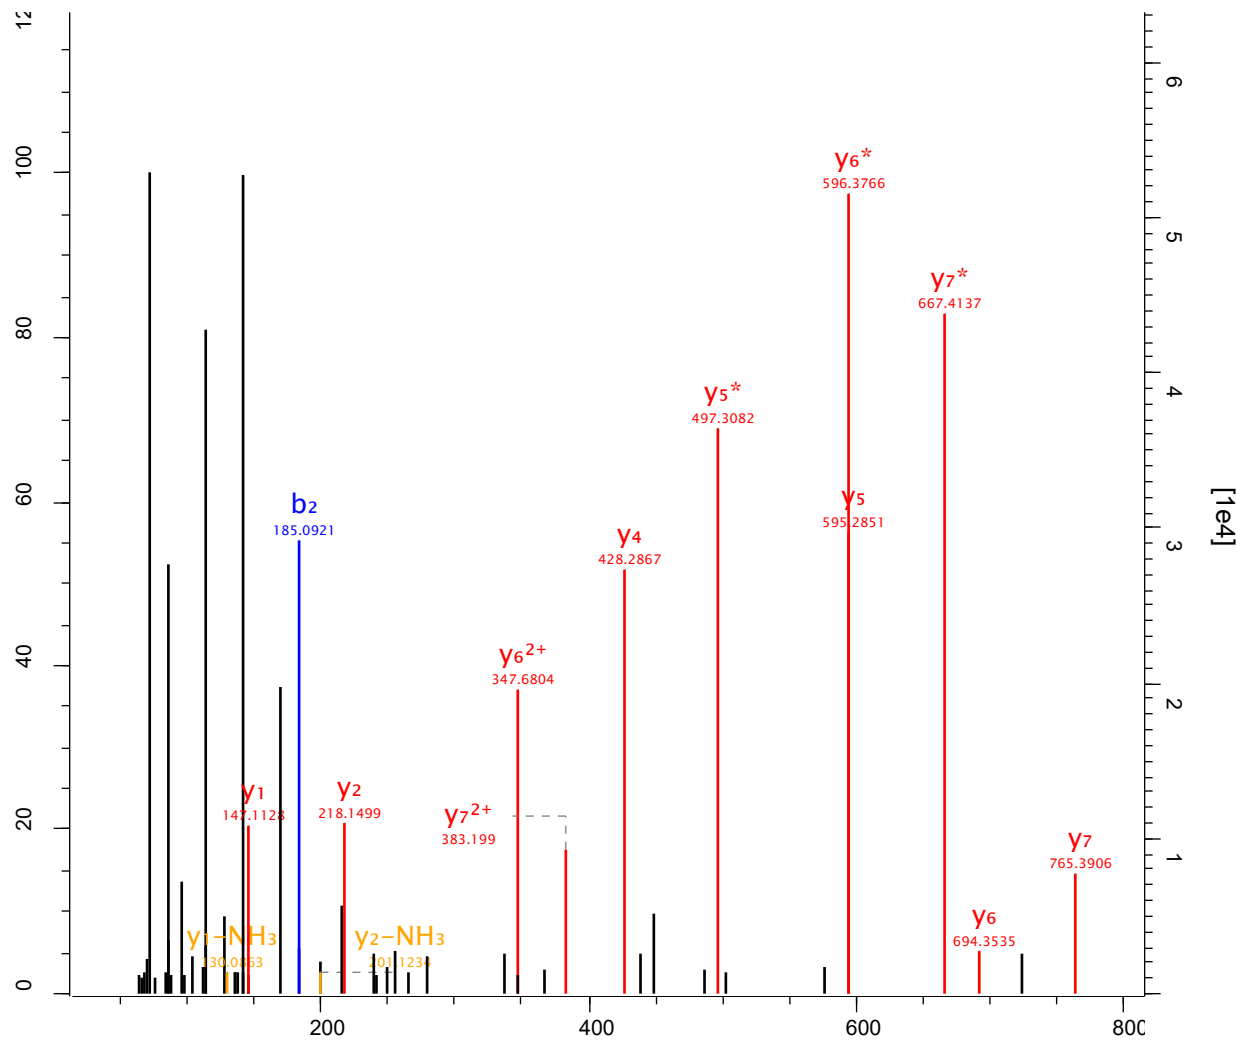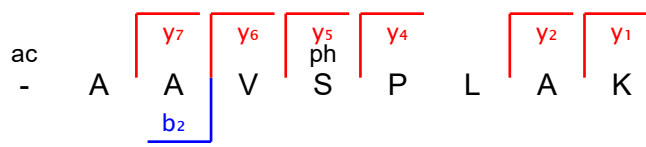

Raw file Scan Method Score m/z  
 sys\_00\_3short 19584 FTMS; HCD 82.64 470.23

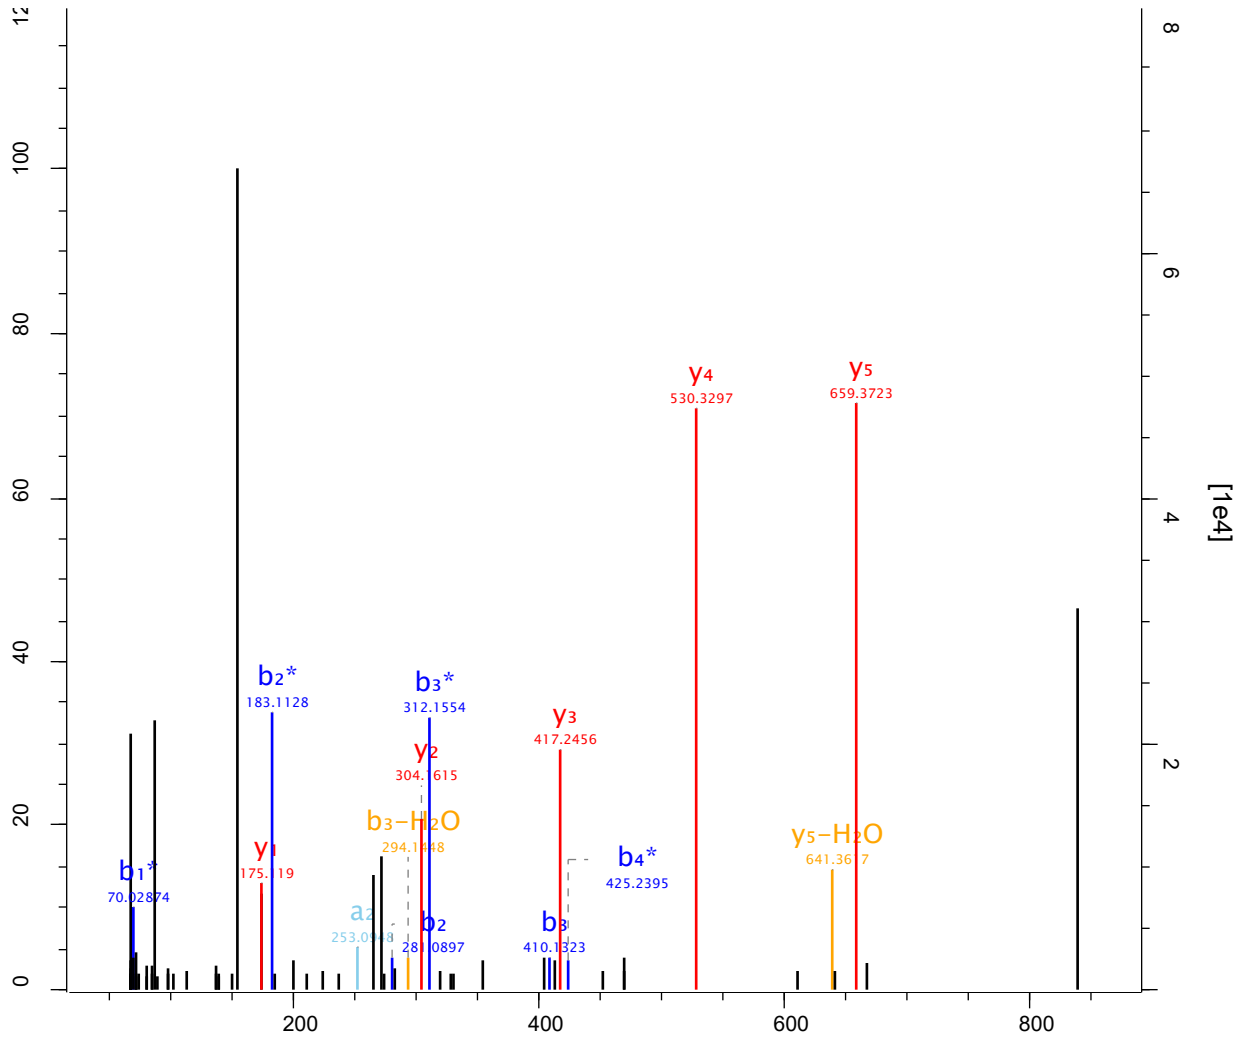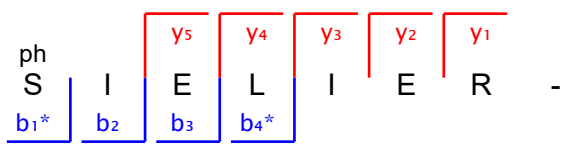

Raw file Scan Method Score m/z  
 sys\_00\_3short 19632 FTMS; HCD 125.98 734.28

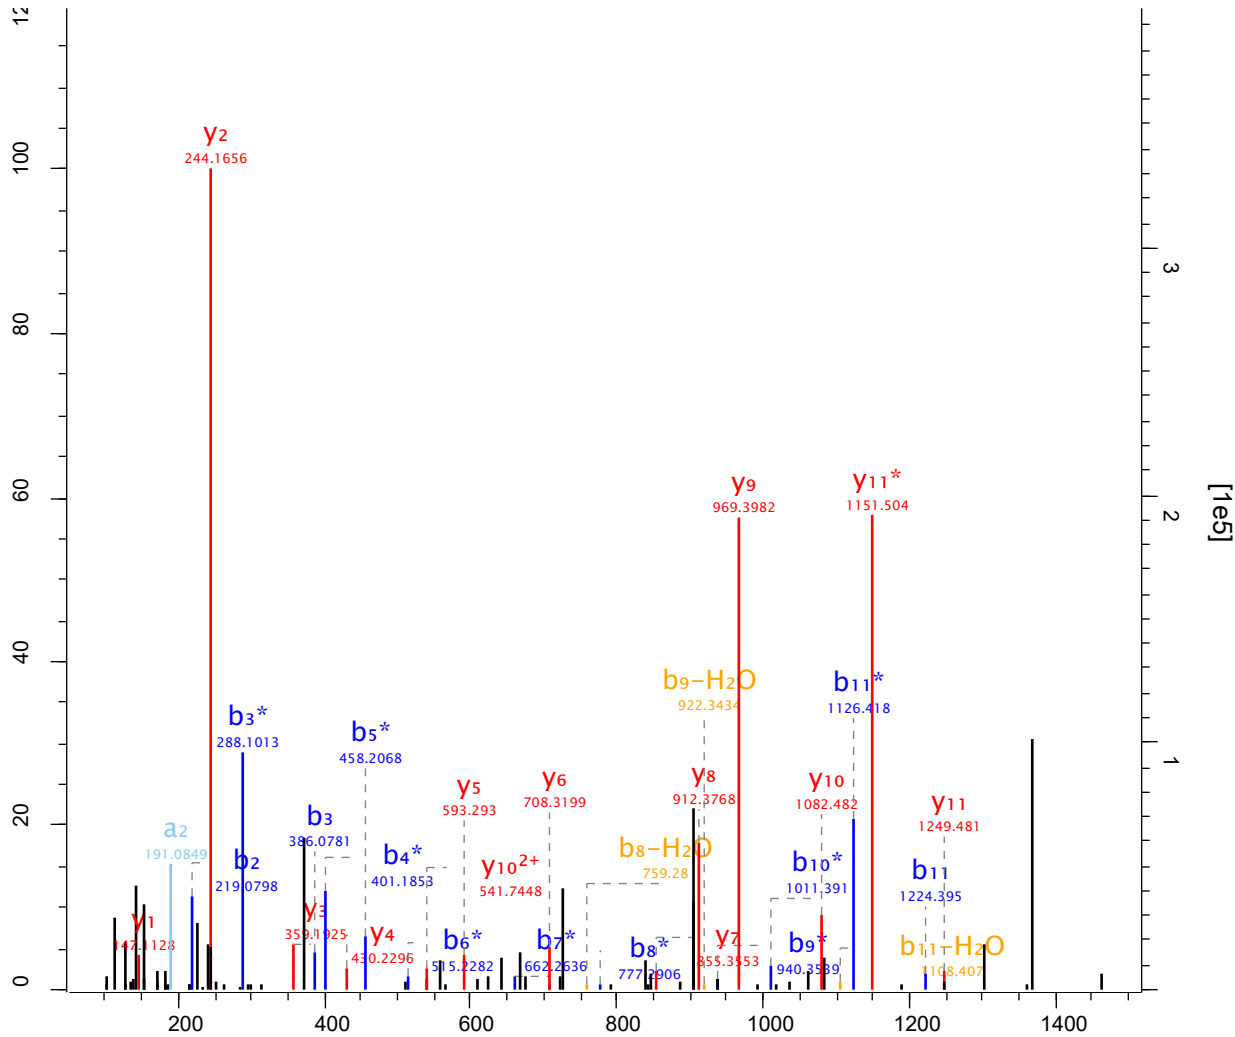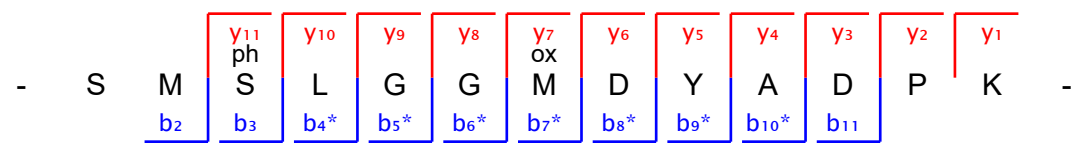

Raw file Scan Method Score m/z  
 sys\_00\_3short 19679 FTMS; HCD 99.41 758.34

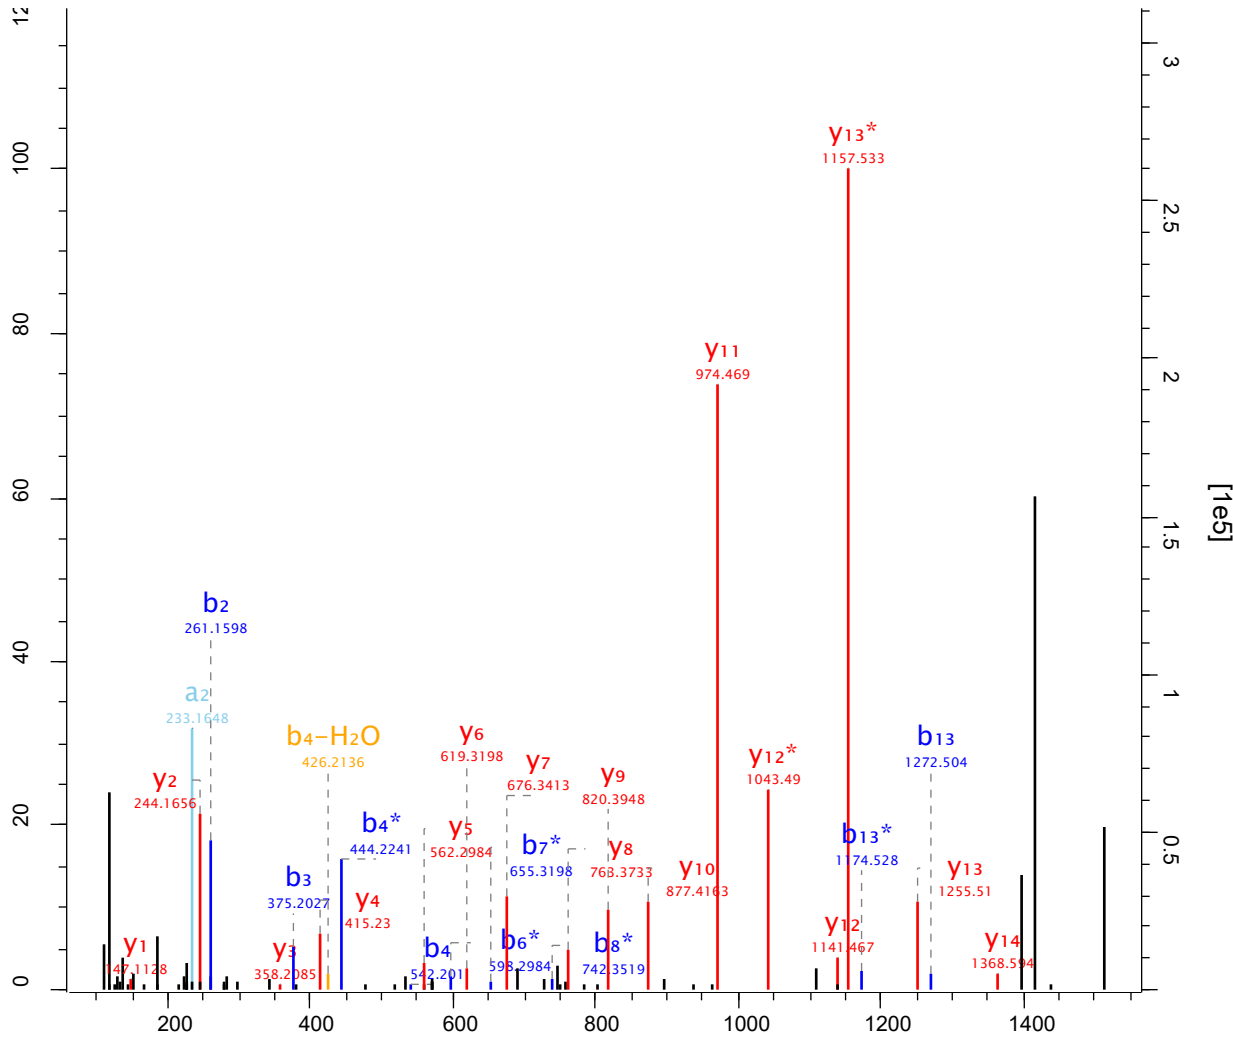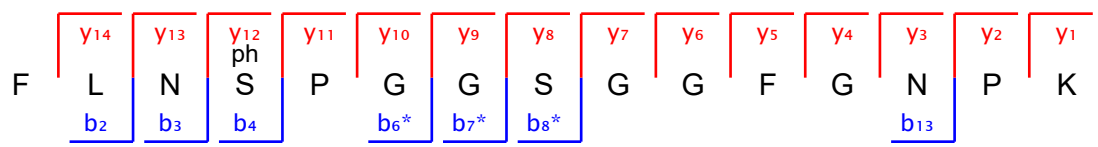

Raw file Scan Method Score m/z  
 sys\_00\_3short 19768 FTMS; HCD 79.84 729.32

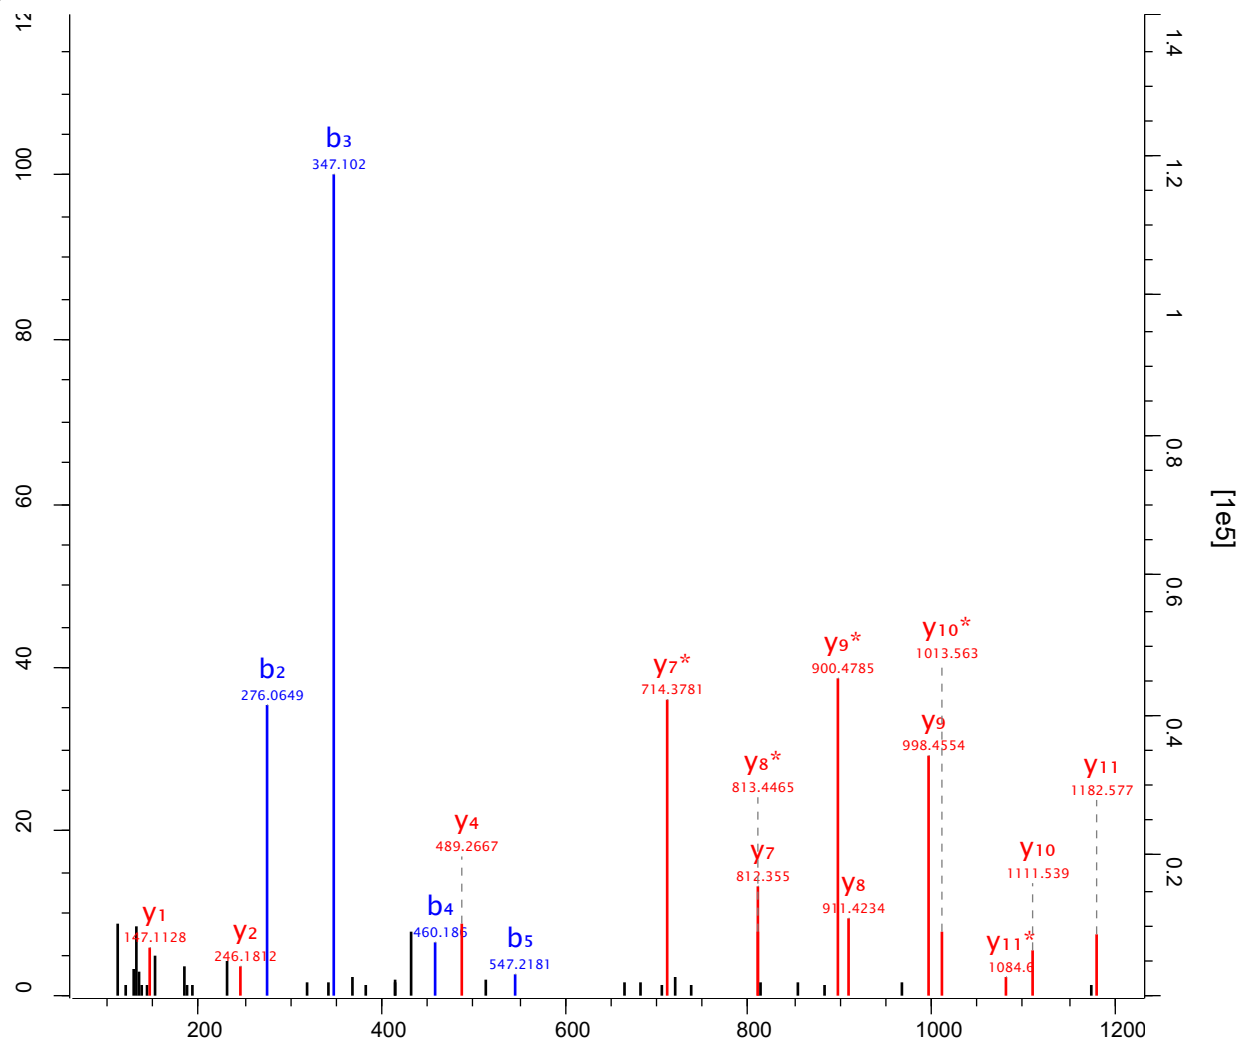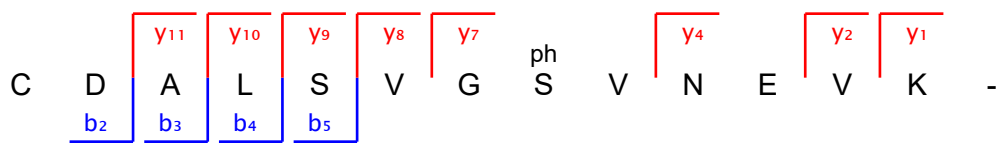



Raw file Scan Method Score m/z  
 sys\_00\_3short 19769 FTMS; HCD 90.61 533.77

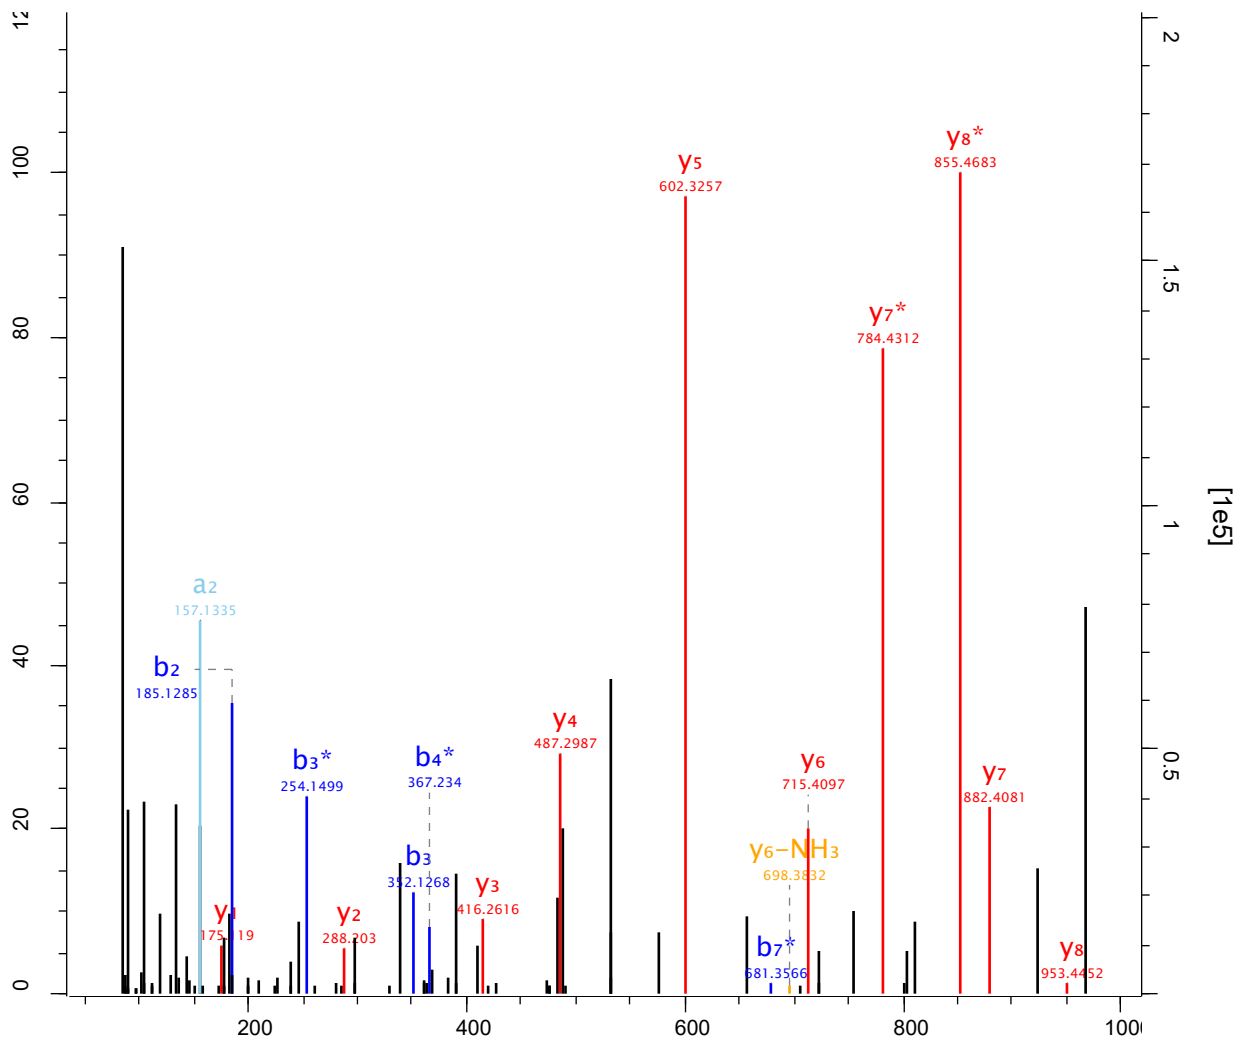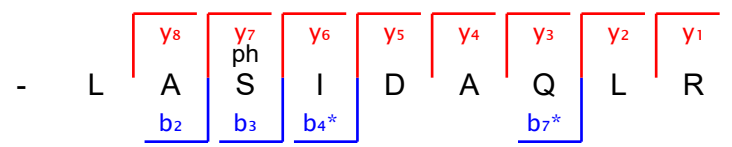

Raw file Scan Method Score m/z  
 sys\_00\_3short 19783 FTMS; HCD 85.52 698.79

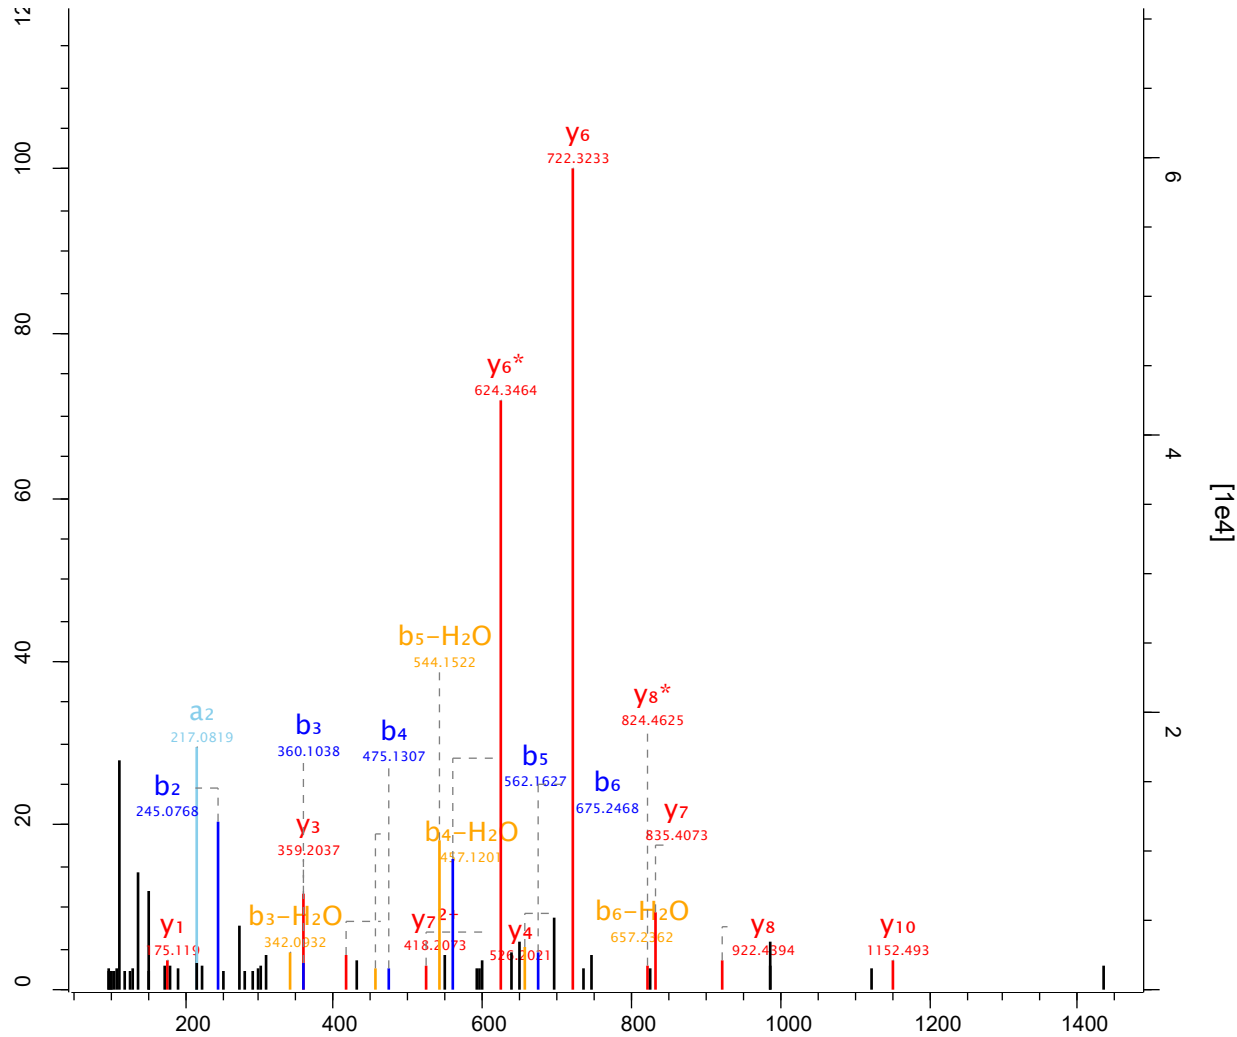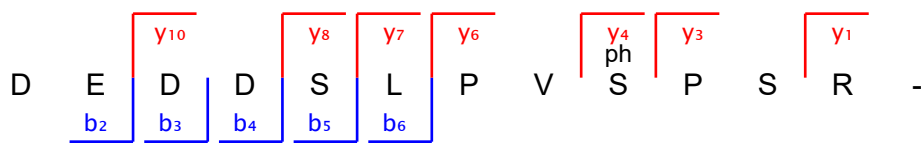

Raw file Scan Method Score m/z  
 sys\_00\_3short 19824 FTMS; HCD 93.24 706.31

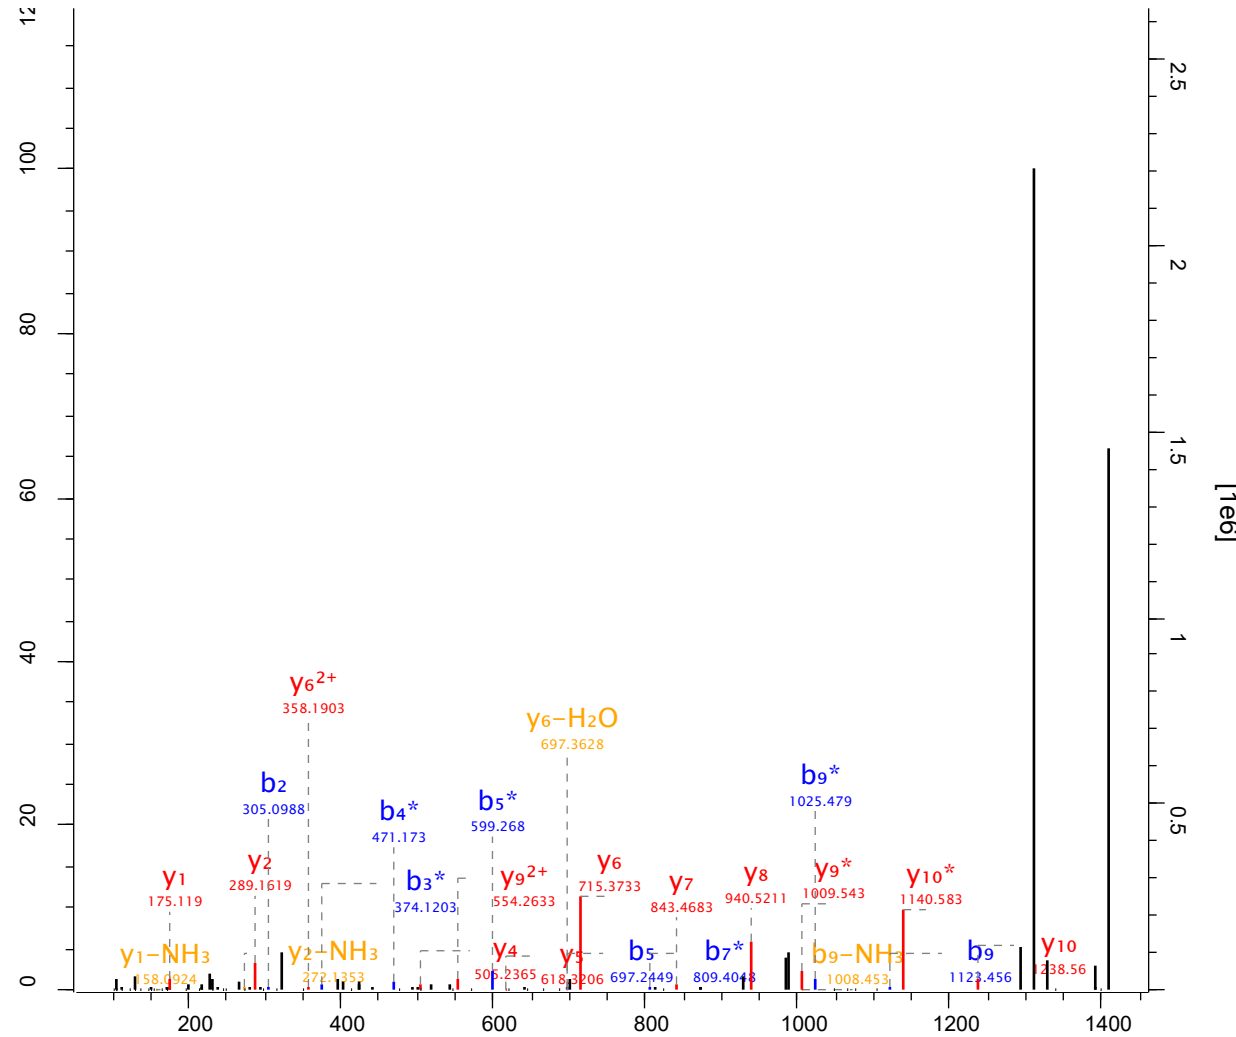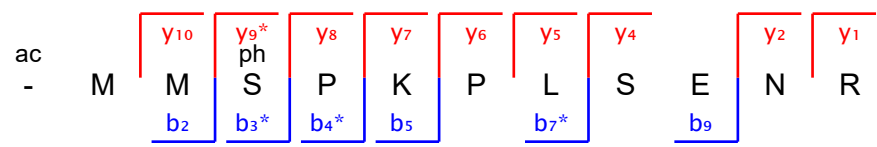

Raw file Scan Method Score m/z  
 sys\_00\_3short 19831 FTMS; HCD 97.16 475.76

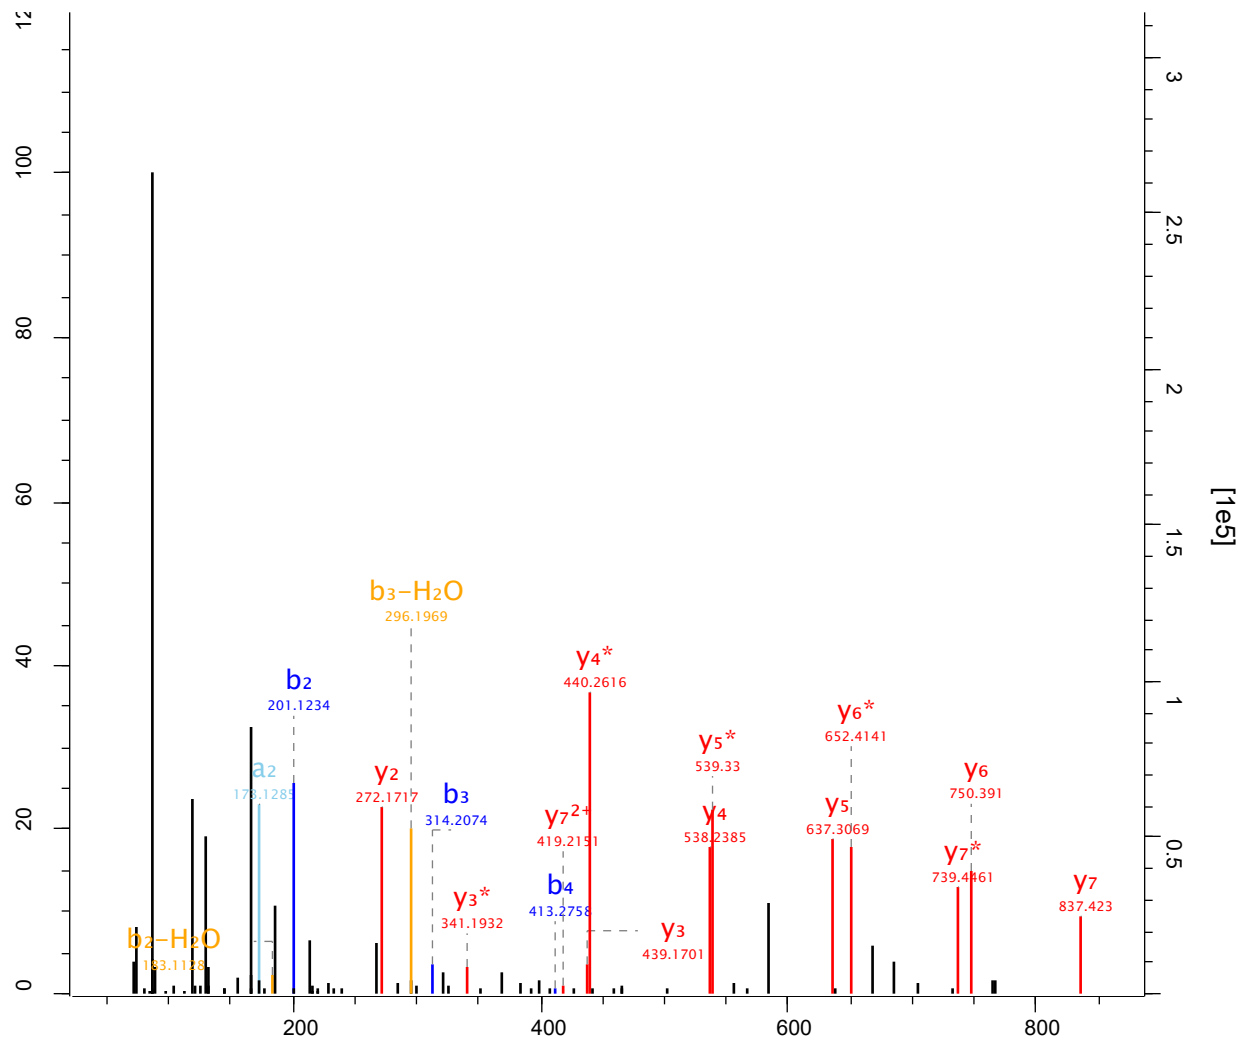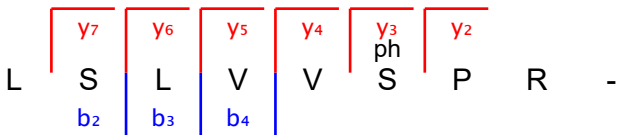

Raw file Scan Method Score m/z  
 sys\_00\_3short 20043 FTMS; HCD 82.01 853.86

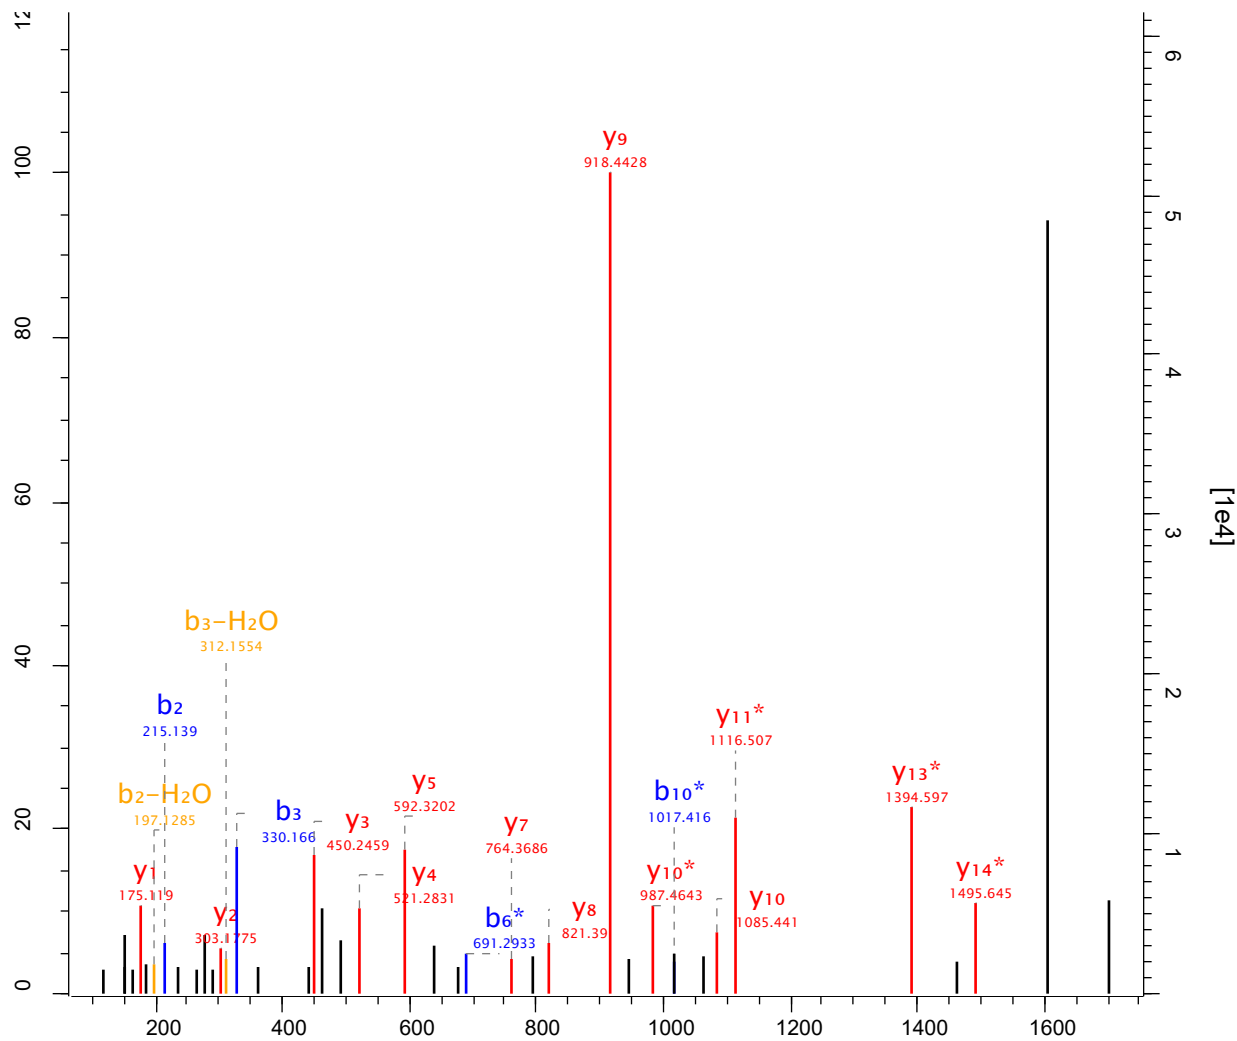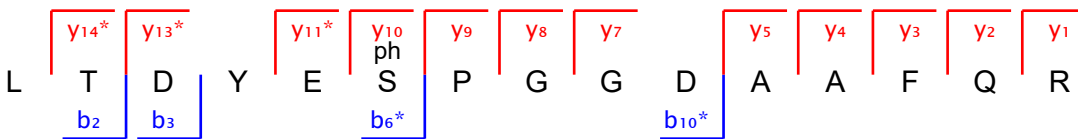

Raw file Scan Method Score m/z  
 sys\_00\_3short 20186 FTMS; HCD 178.71 807.36

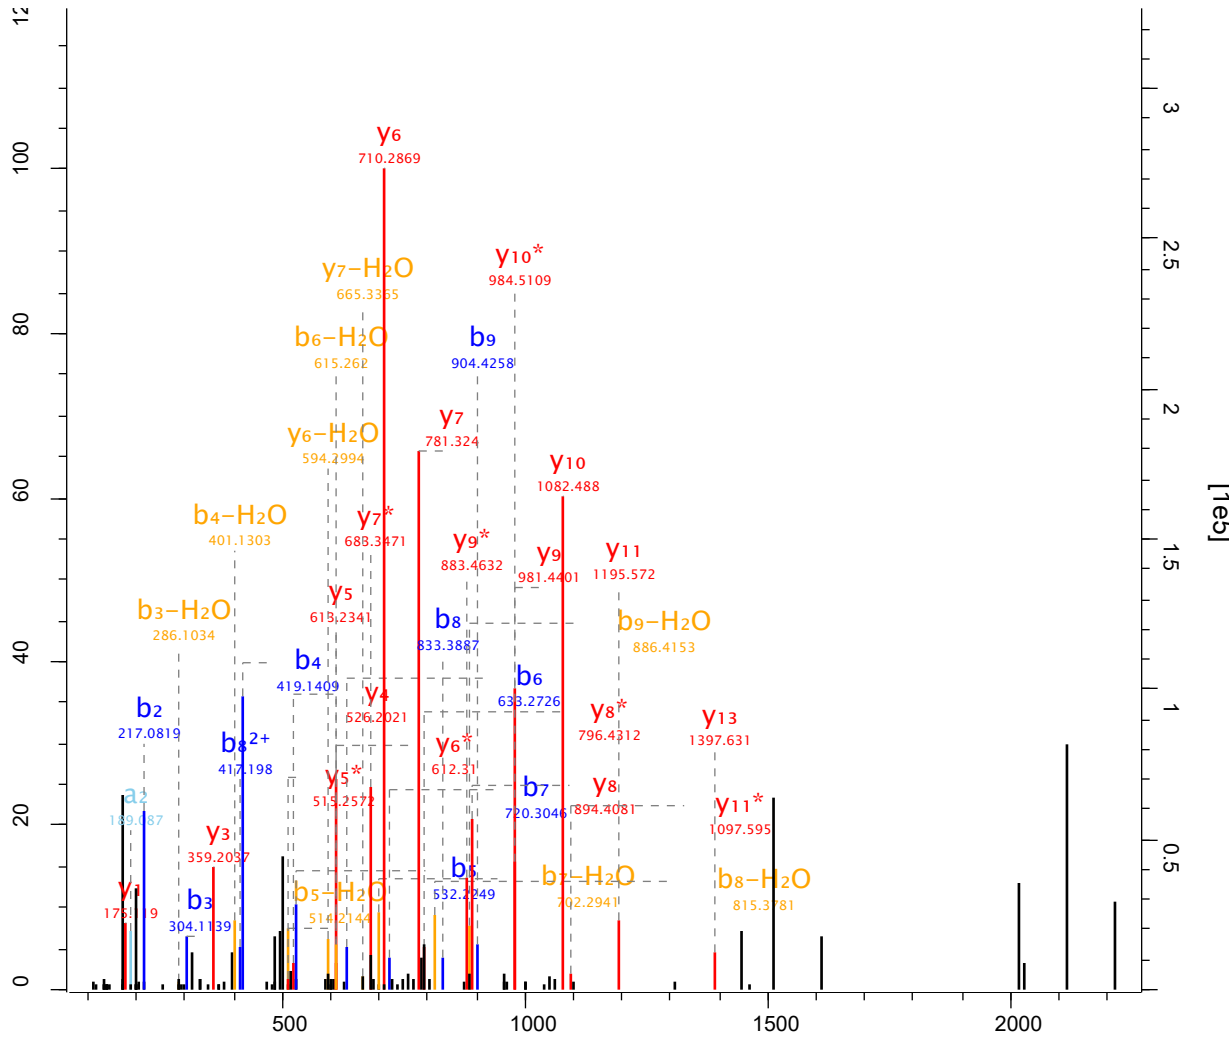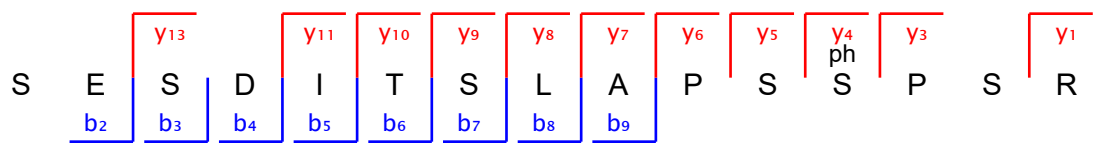

Raw file Scan Method Score m/z  
 sys\_00\_3short 20462 FTMS; HCD 72.9 646.24

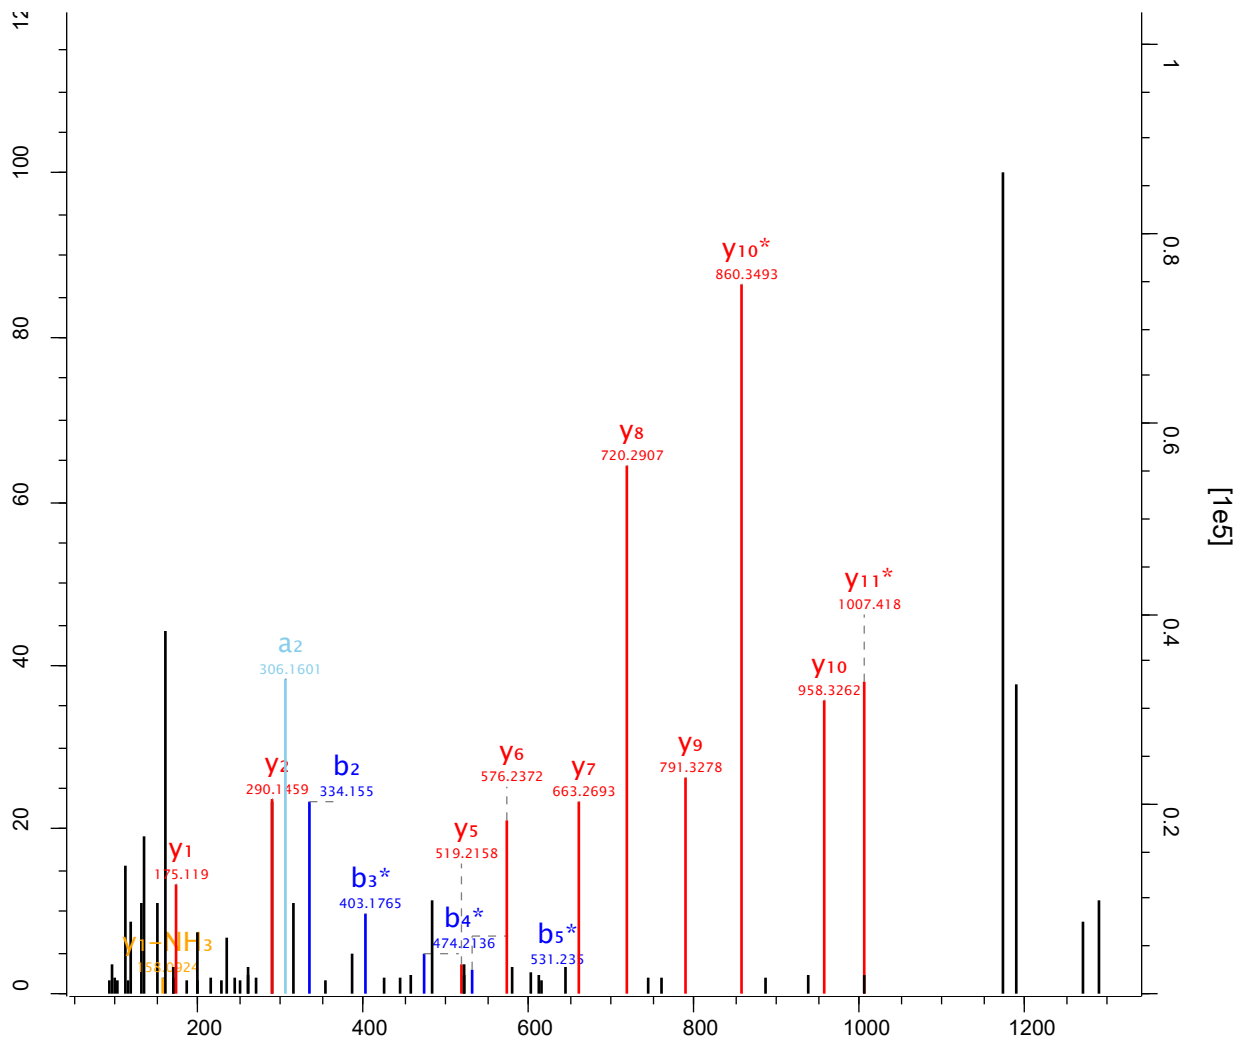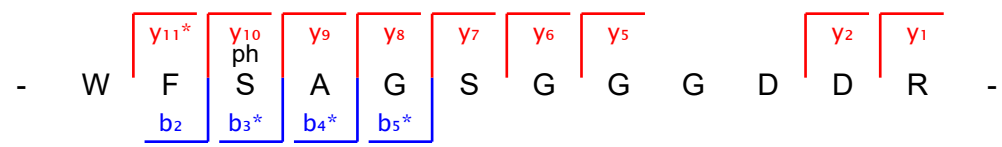

| Raw file      | Scan  | Method    | Score | m/z    |
|---------------|-------|-----------|-------|--------|
| sys_00_3short | 20627 | FTMS; HCD | 66.27 | 529.24 |

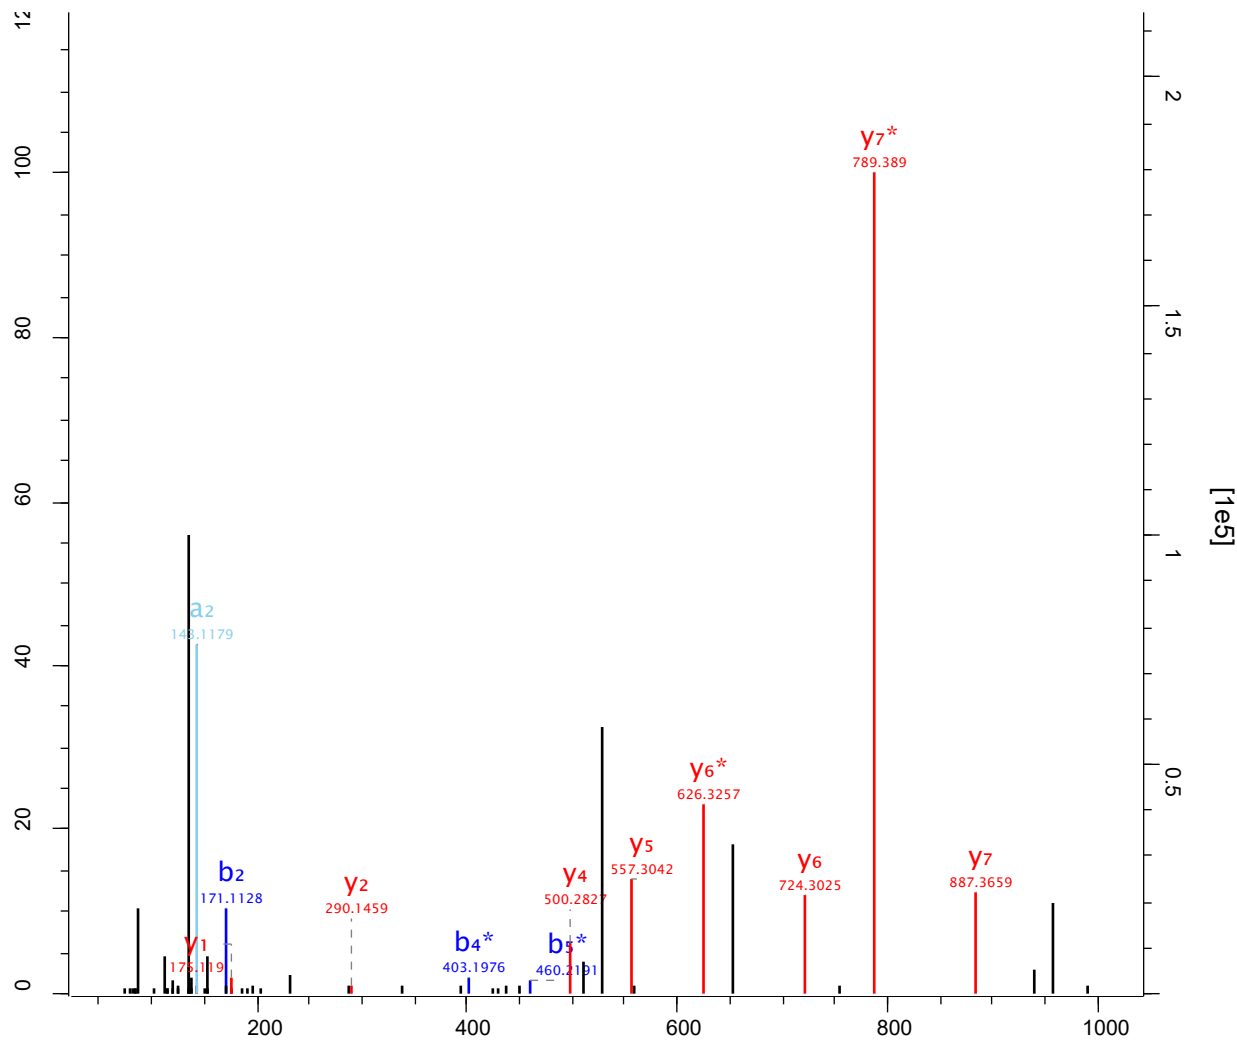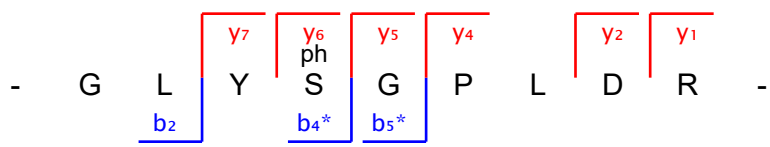



Raw file Scan Method Score m/z  
 sys\_00\_3short 20689 FTMS; HCD 70.47 675.29

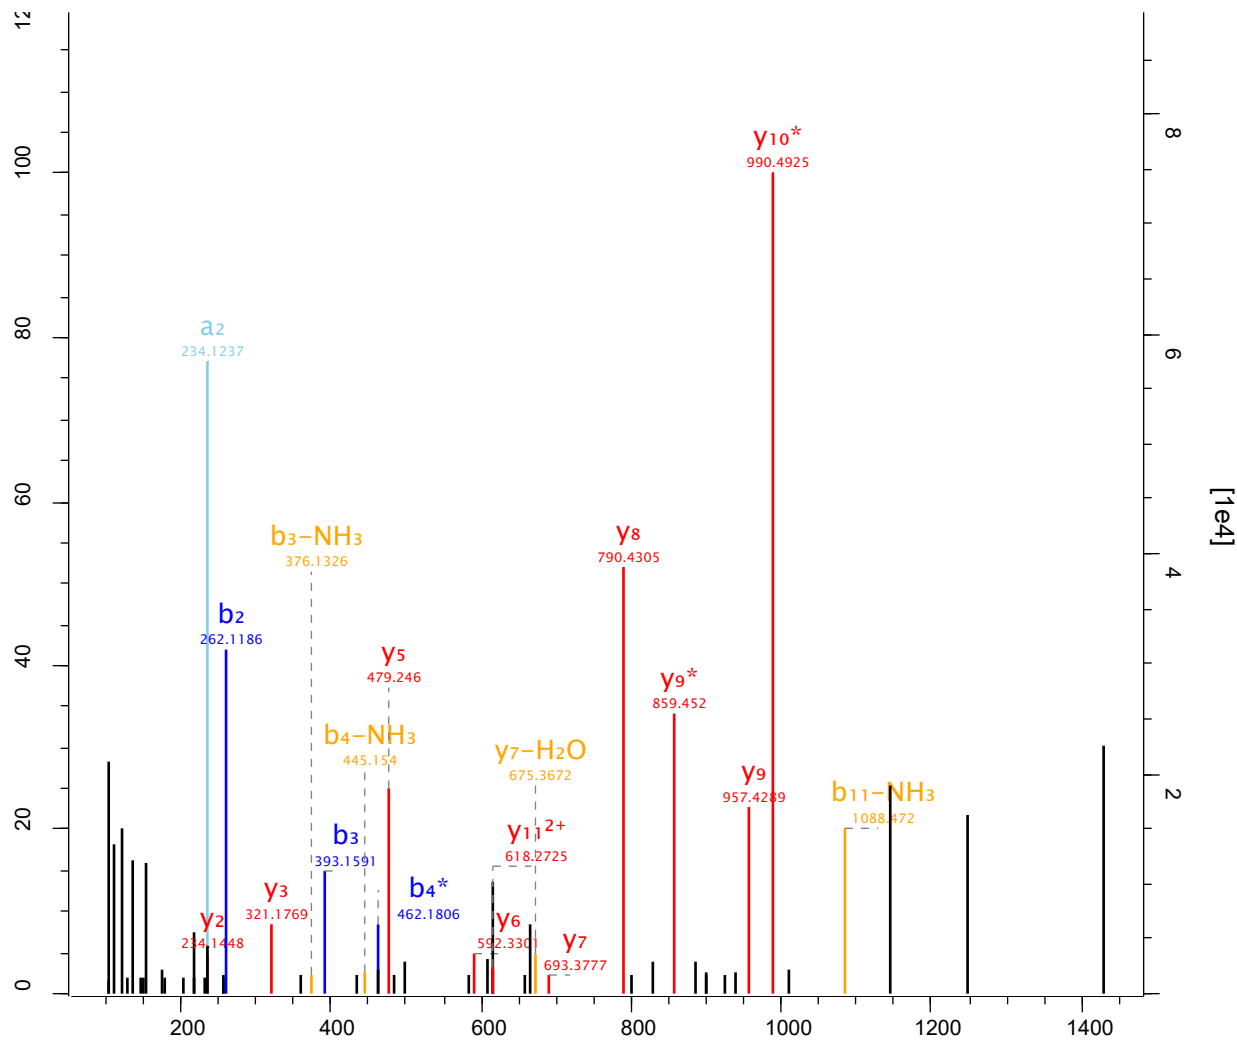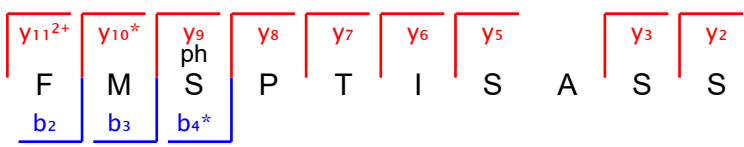

Raw file Scan Method Score m/z  
 sys\_00\_3short 20716 FTMS; HCD 131.26 709.3

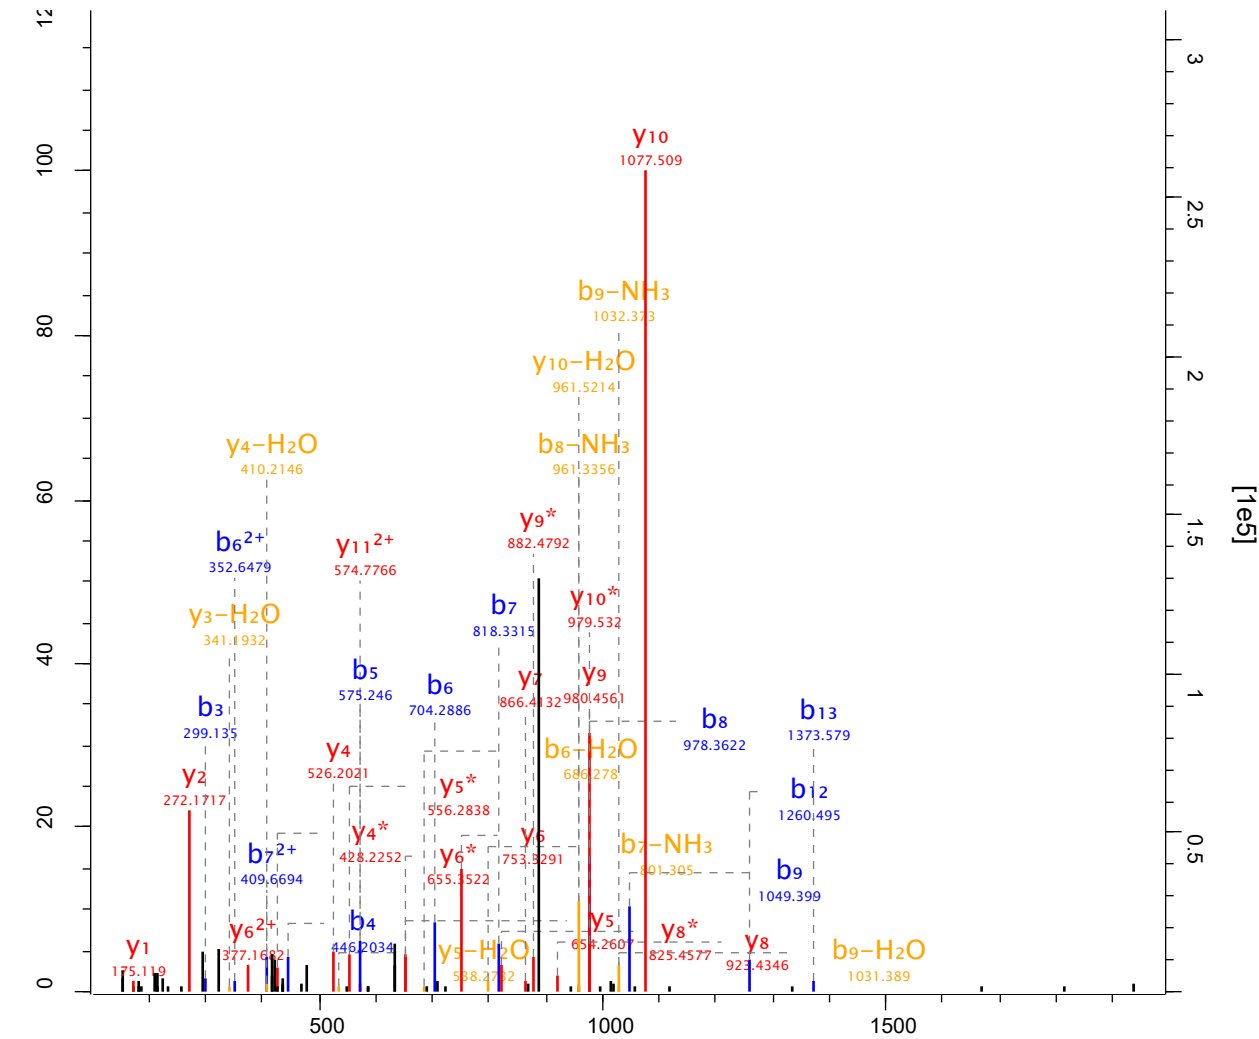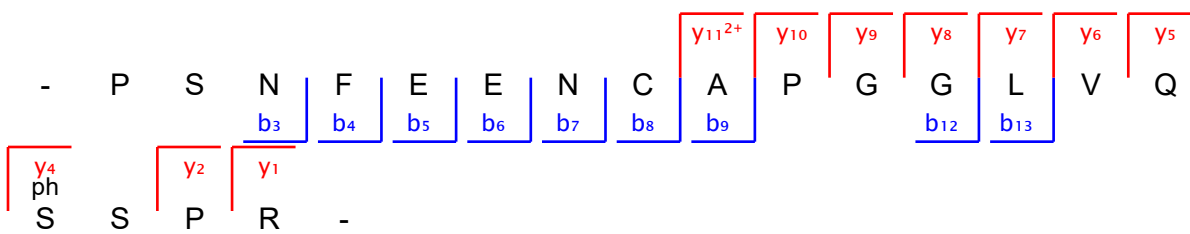

Raw file Scan Method Score m/z  
 sys\_00\_3short 20790 FTMS; HCD 80.24 572.76

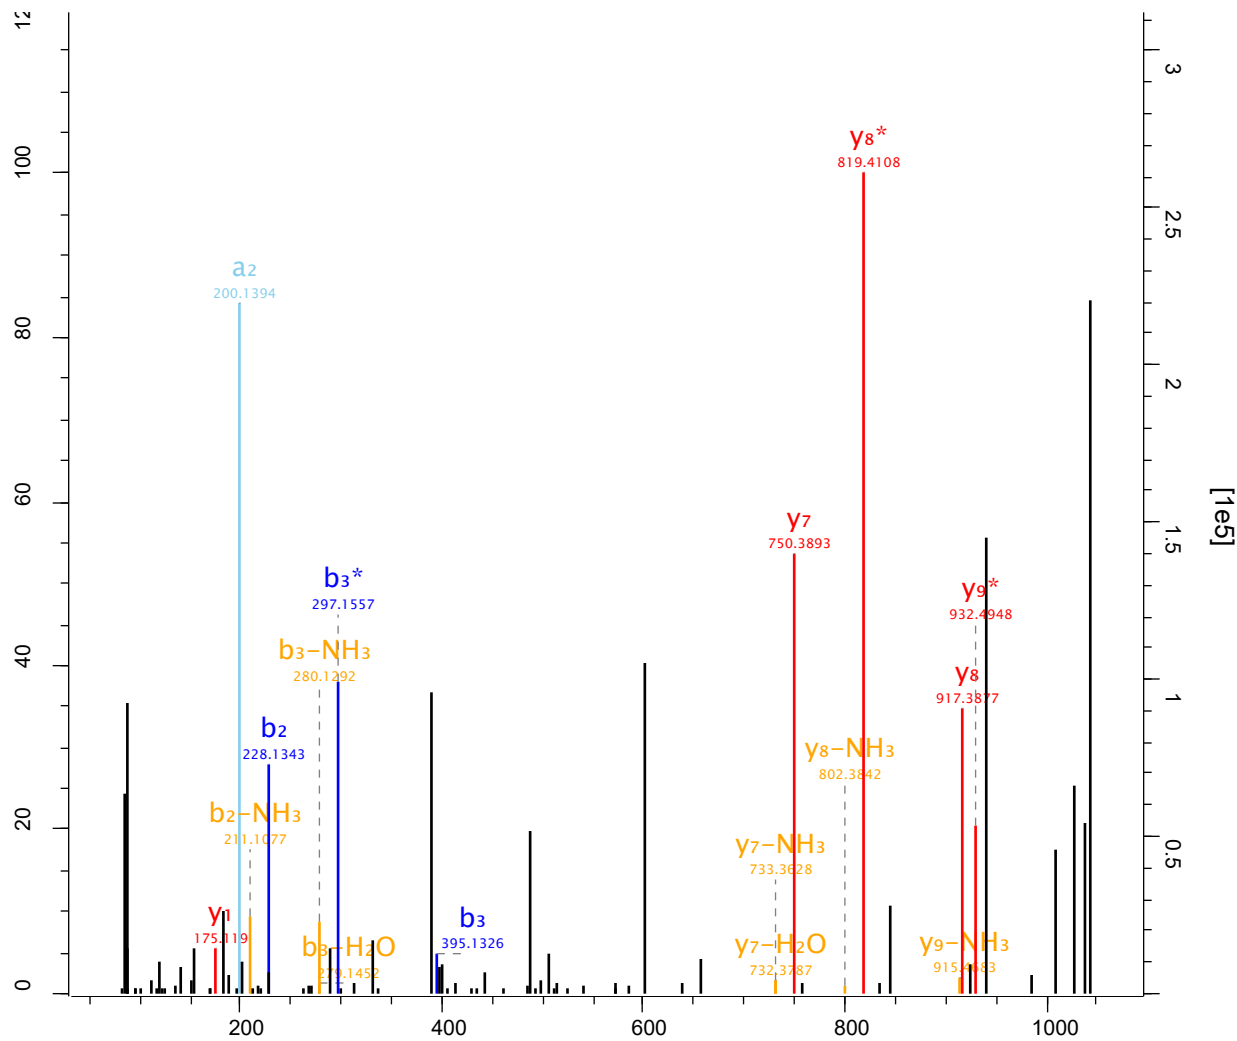

- N I S G F S N I G R -

Annotations: y<sub>9</sub>\* (red), y<sub>8</sub> ph (red), y<sub>8</sub> (red), y<sub>7</sub> (red), y<sub>1</sub> (red), b<sub>2</sub> (blue), b<sub>3</sub> (blue)

Raw file Scan Method Score m/z  
 sys\_00\_3short 20825 FTMS; HCD 123.14 754.8

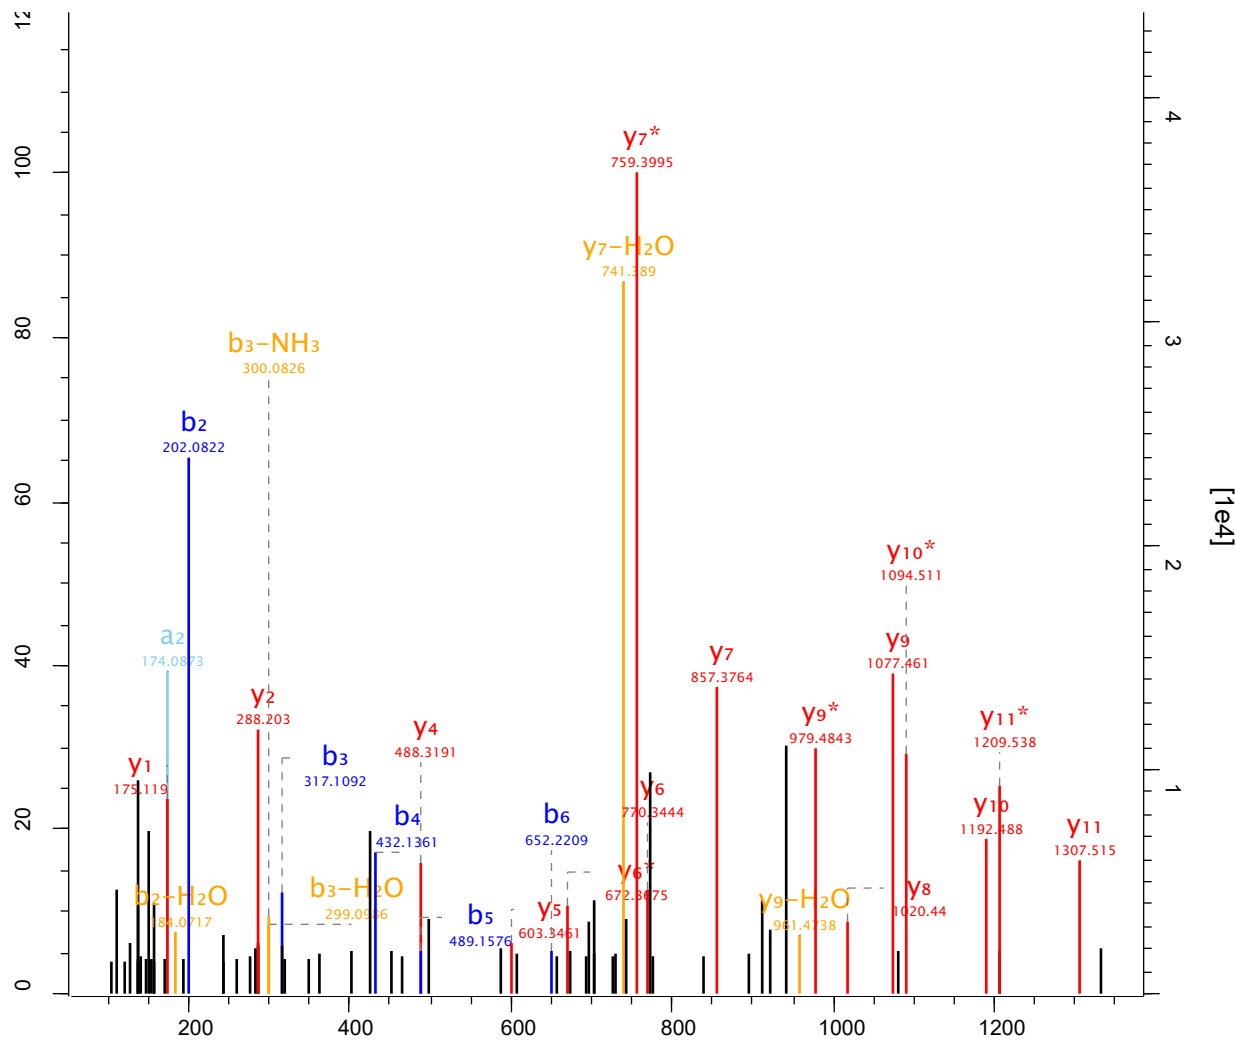

- N S D D G Y S S ph S D S I L R -

b<sub>2</sub>
b<sub>3</sub>
b<sub>4</sub>
b<sub>5</sub>
b<sub>6</sub>
y<sub>11</sub>
y<sub>10</sub>
y<sub>9</sub>
y<sub>8</sub>
y<sub>7</sub>
y<sub>6</sub>
y<sub>5</sub>
y<sub>4</sub>
y<sub>2</sub>
y<sub>1</sub>

Raw file Scan Method Score m/z  
 sys\_00\_3short 21140 FTMS; HCD 71.15 543.27

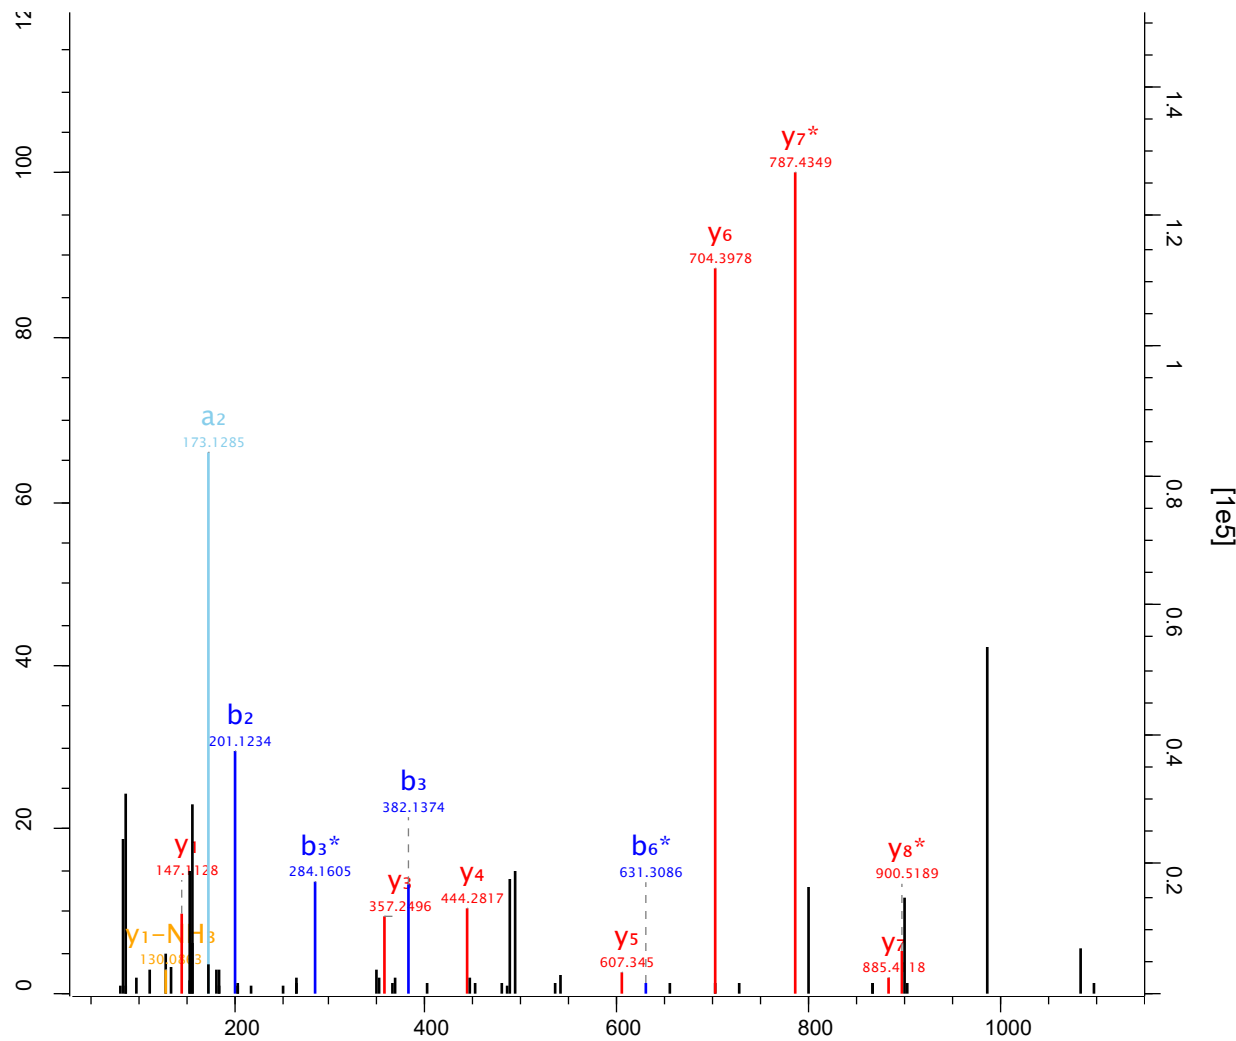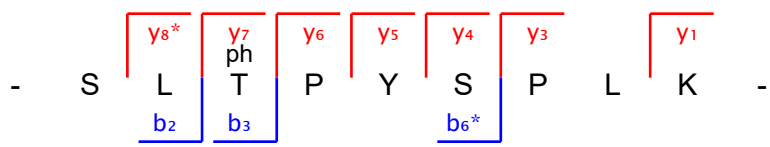

Raw file Scan Method Score m/z  
 sys\_00\_3short 21501 FTMS; HCD 109.72 869.86

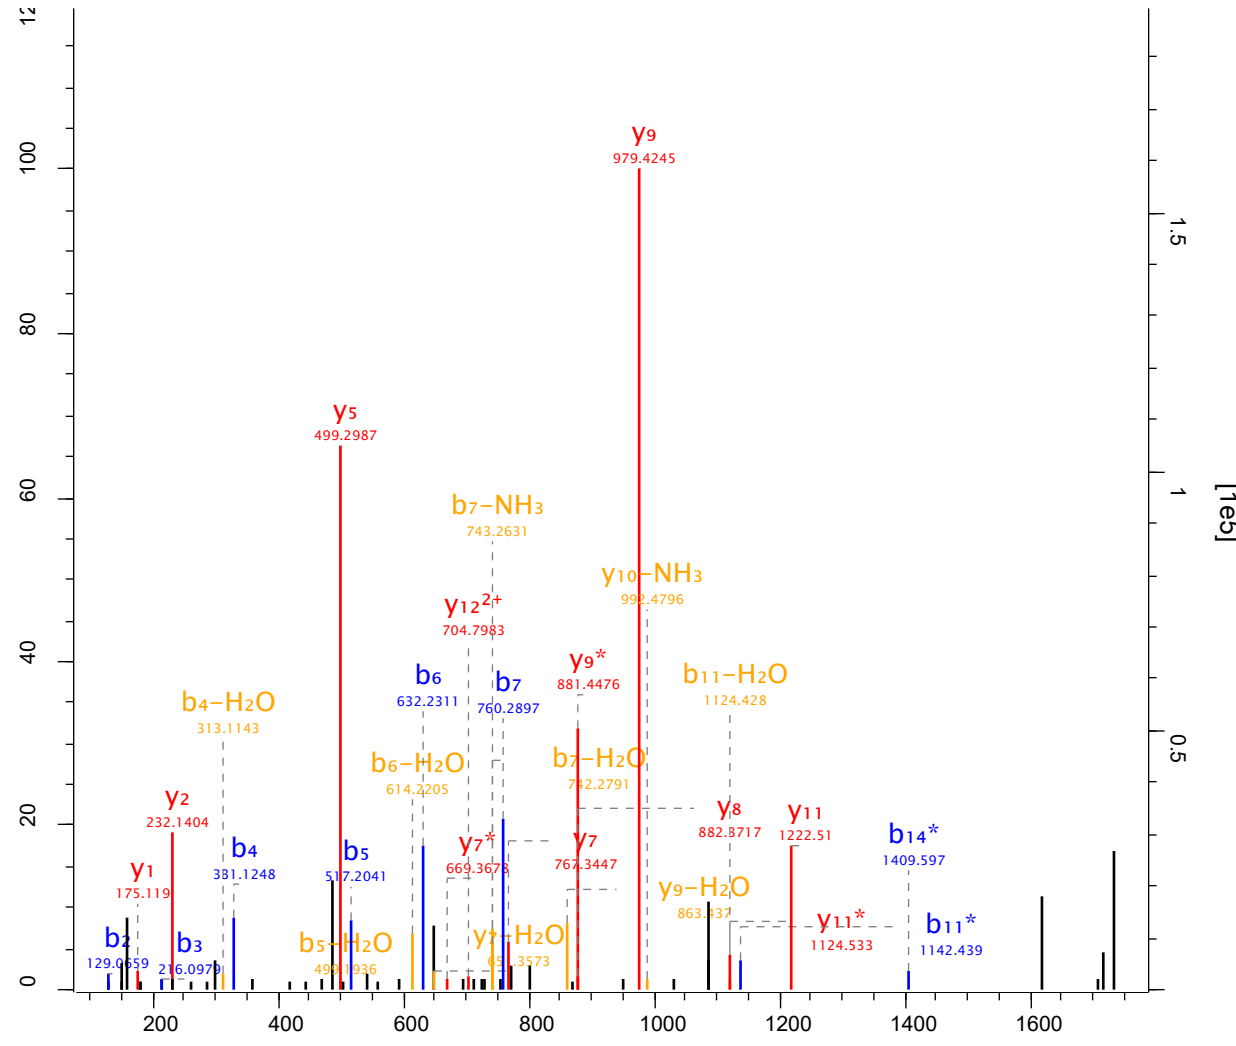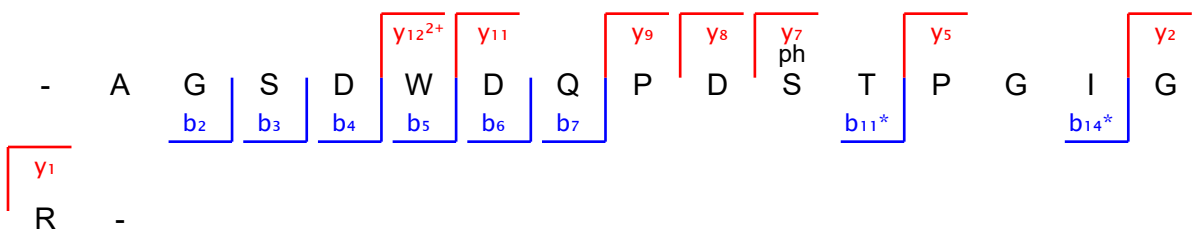

| Raw file      | Scan  | Method    | Score | m/z    |
|---------------|-------|-----------|-------|--------|
| sys_00_3short | 21749 | FTMS; HCD | 49.59 | 732.32 |

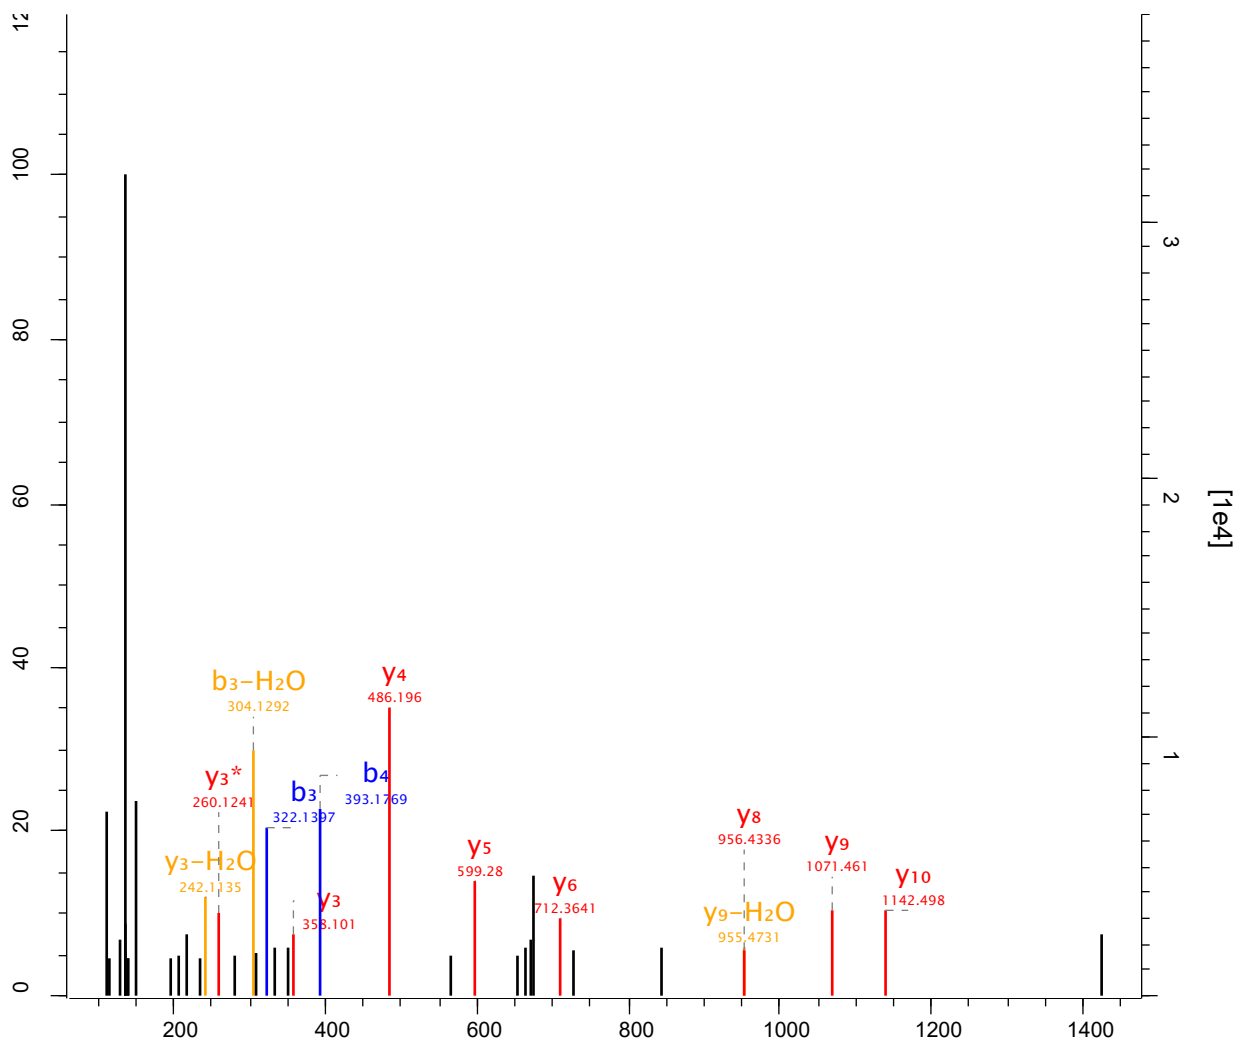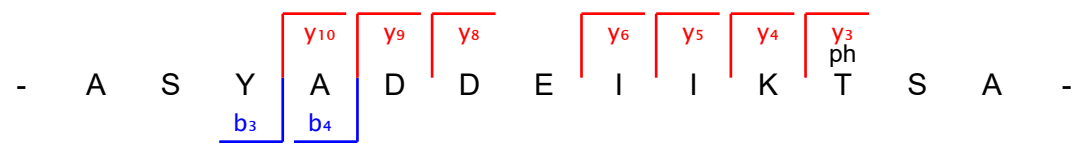

| Raw file      | Scan  | Method    | Score | m/z    |
|---------------|-------|-----------|-------|--------|
| sys_00_3short | 21801 | FTMS; HCD | 73.44 | 481.26 |

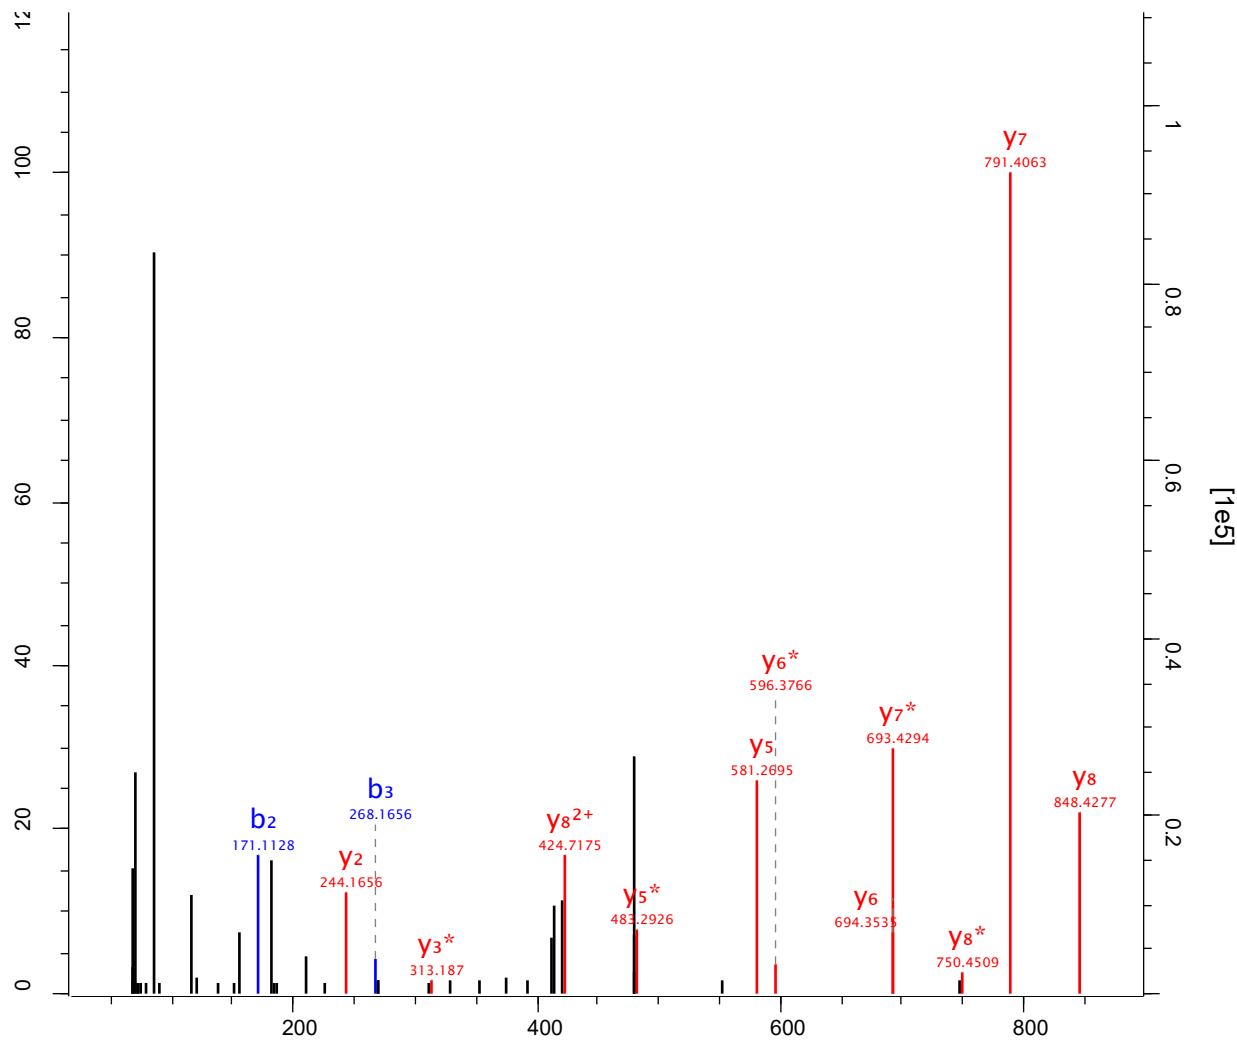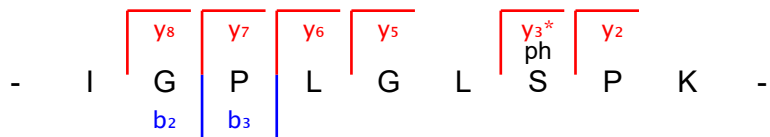



Raw file Scan Method Score m/z  
 sys\_00\_3short 21929 FTMS; HCD 203.2 691.79

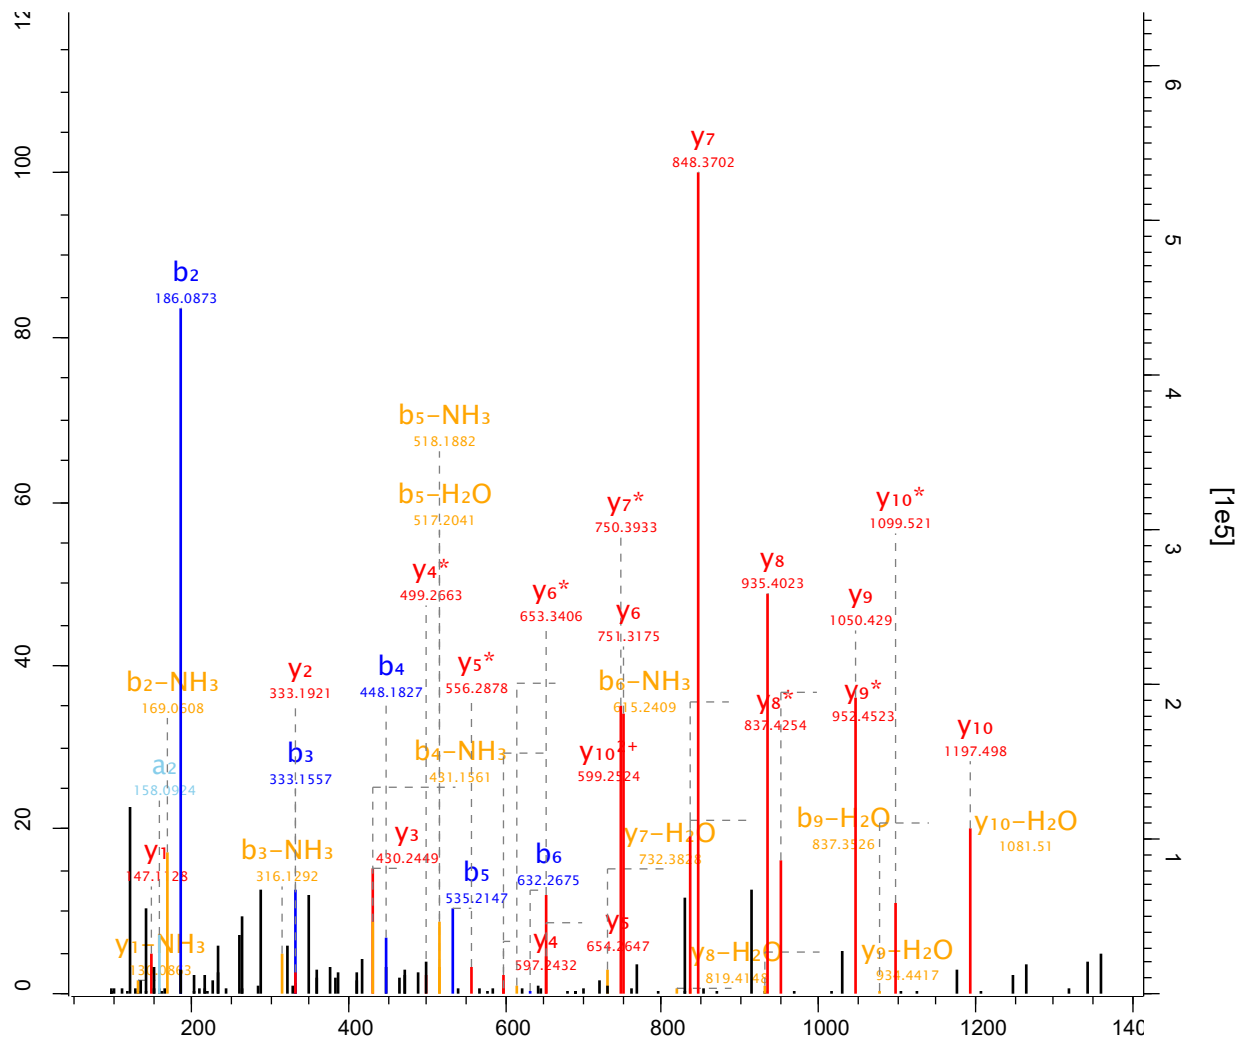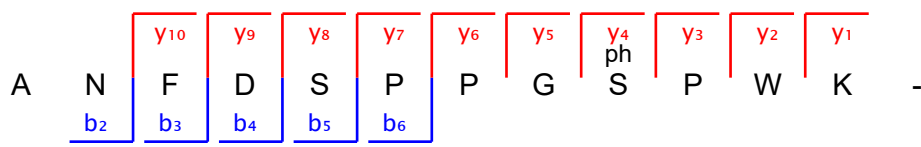

Raw file Scan Method Score m/z  
 sys\_00\_3short 21997 FTMS; HCD 42.31 667.3

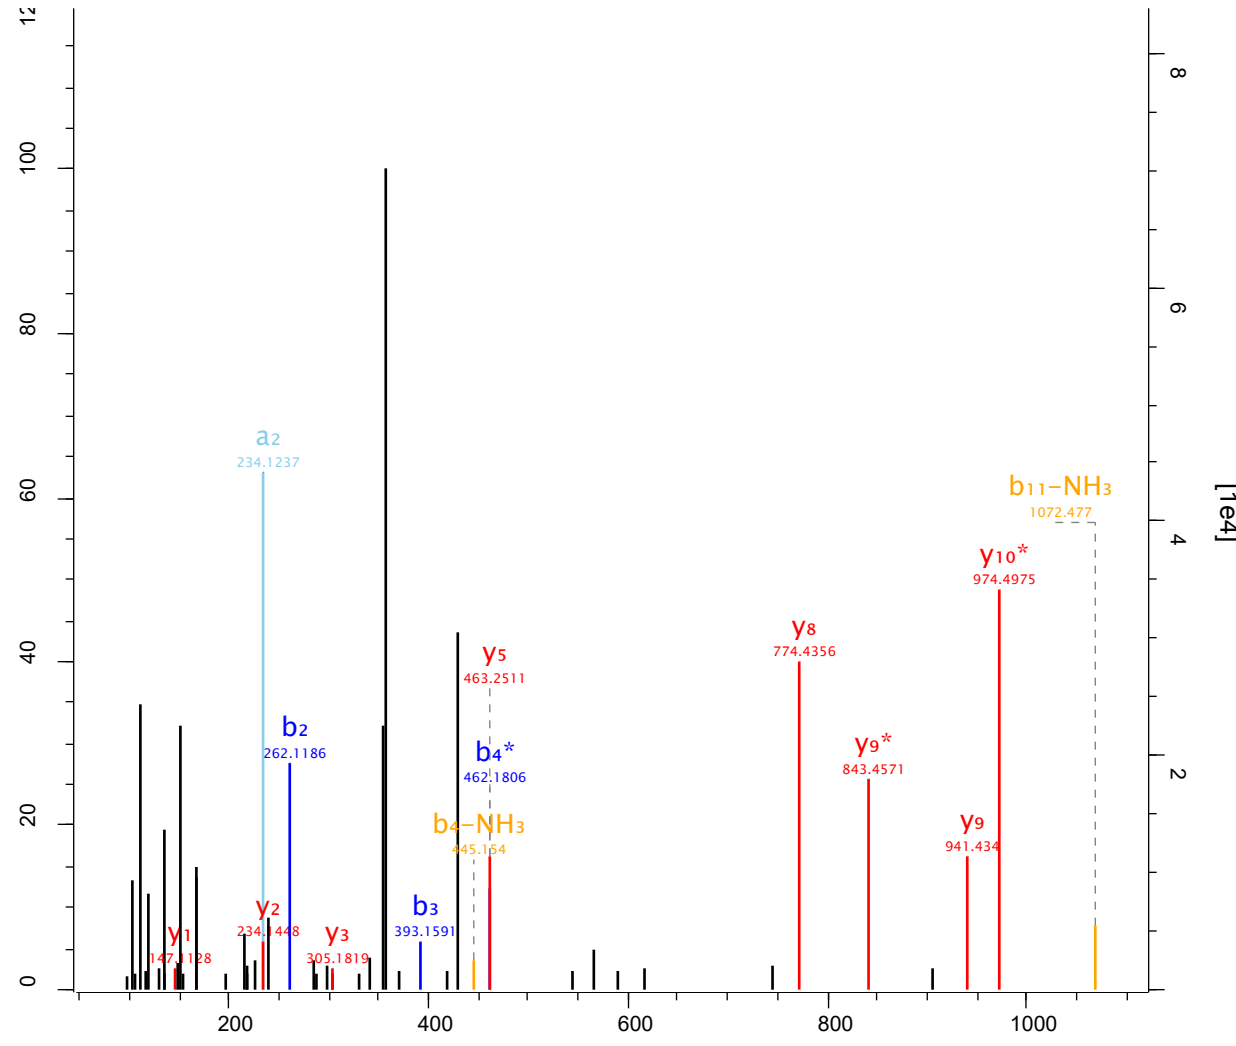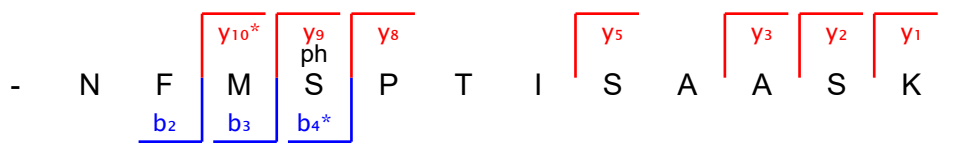

Raw file Scan Method Score m/z  
 sys\_00\_3short 22149 FTMS; HCD 63.69 732.82

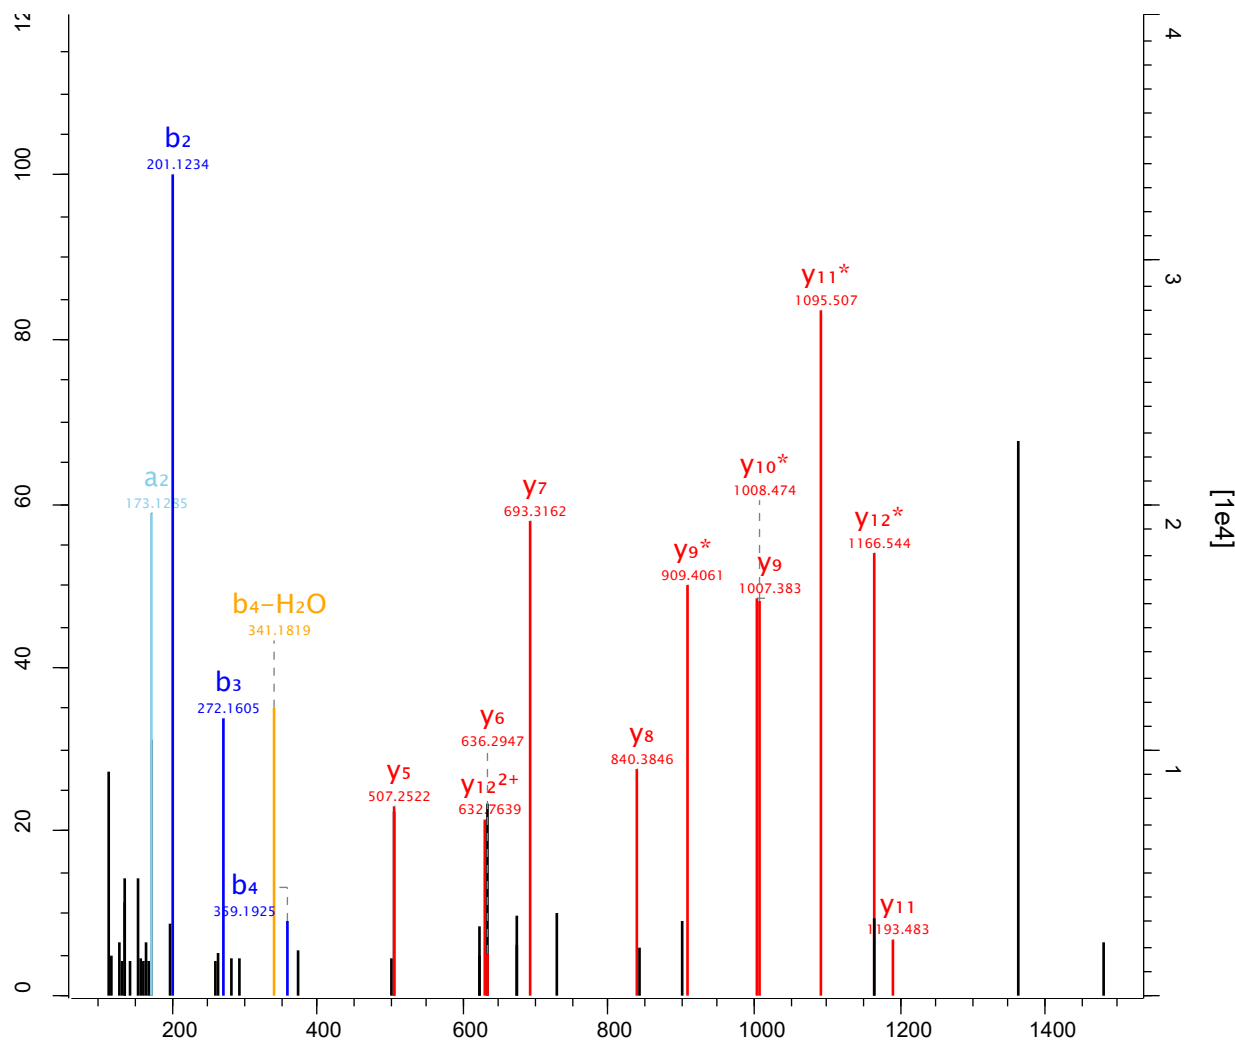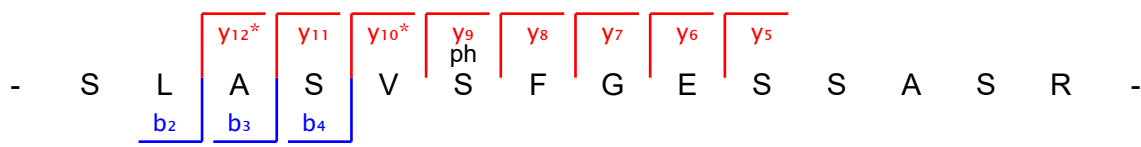

Raw file Scan Method Score m/z  
 sys\_00\_3short 22190 FTMS; HCD 83.75 767.3

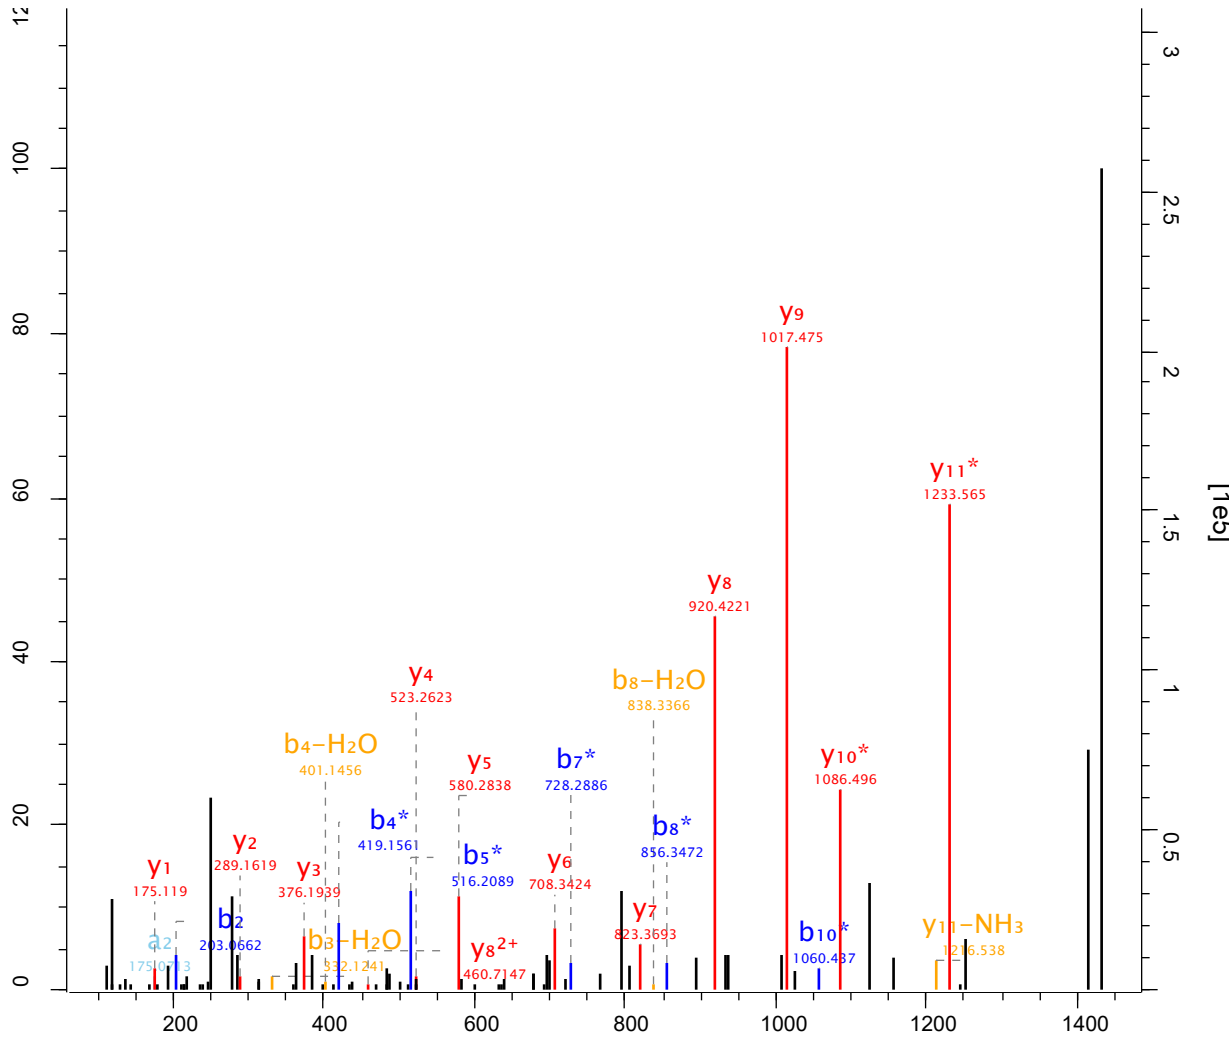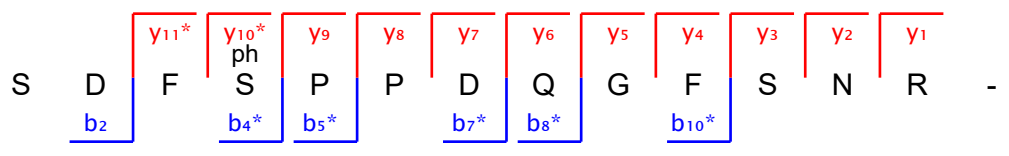

Raw file Scan Method Score m/z  
 sys\_00\_3short 22242 FTMS; HCD 117.37 819.87

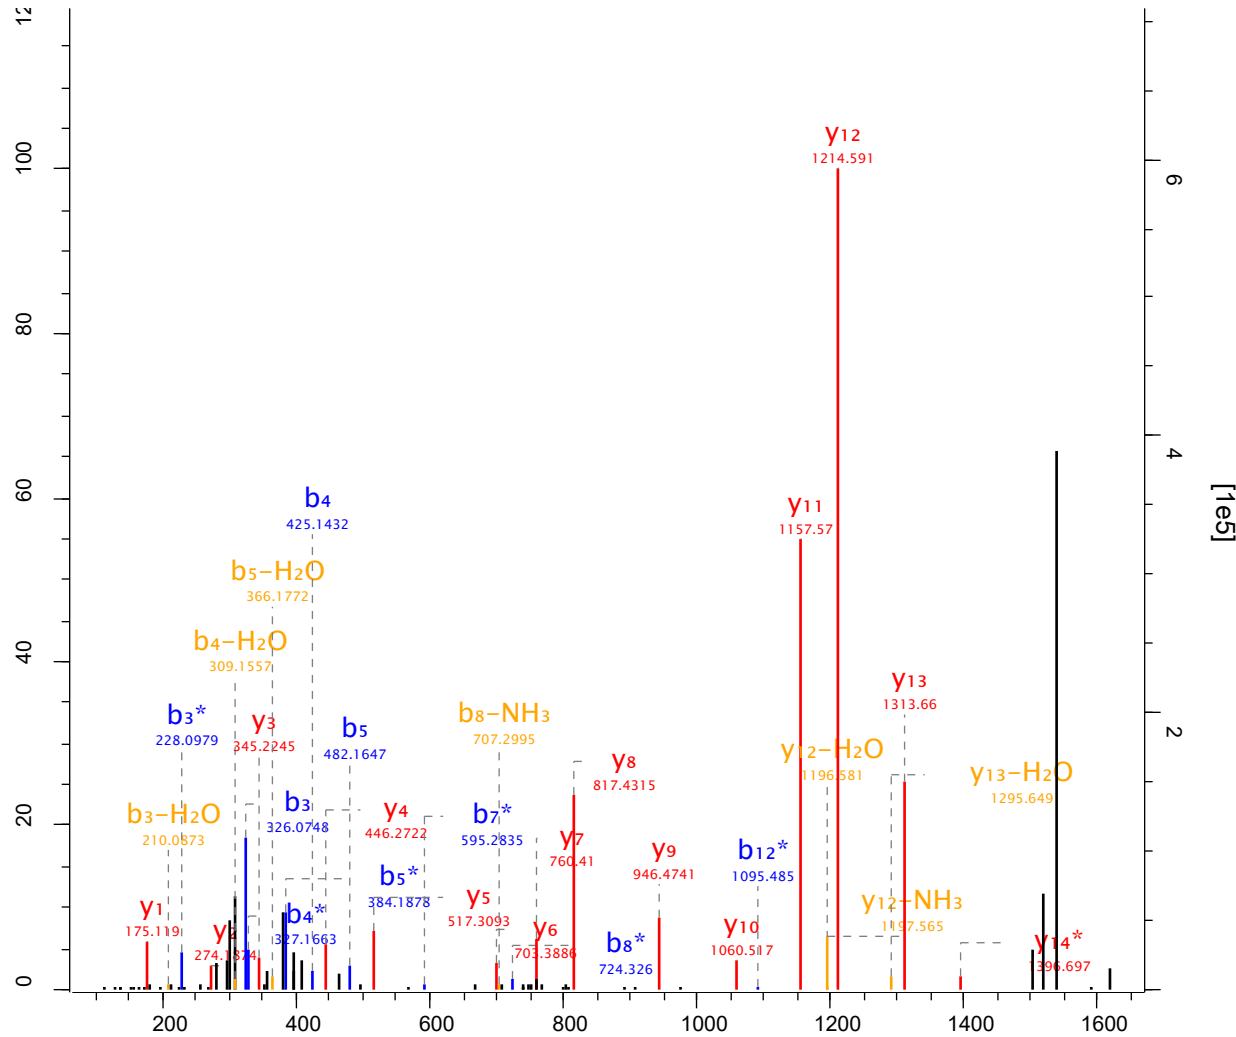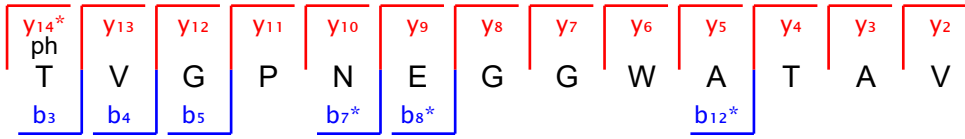

y1  
 R -

| Raw file      | Scan  | Method    | Score | m/z    |
|---------------|-------|-----------|-------|--------|
| sys_00_3short | 22337 | FTMS; HCD | 40.28 | 799.87 |

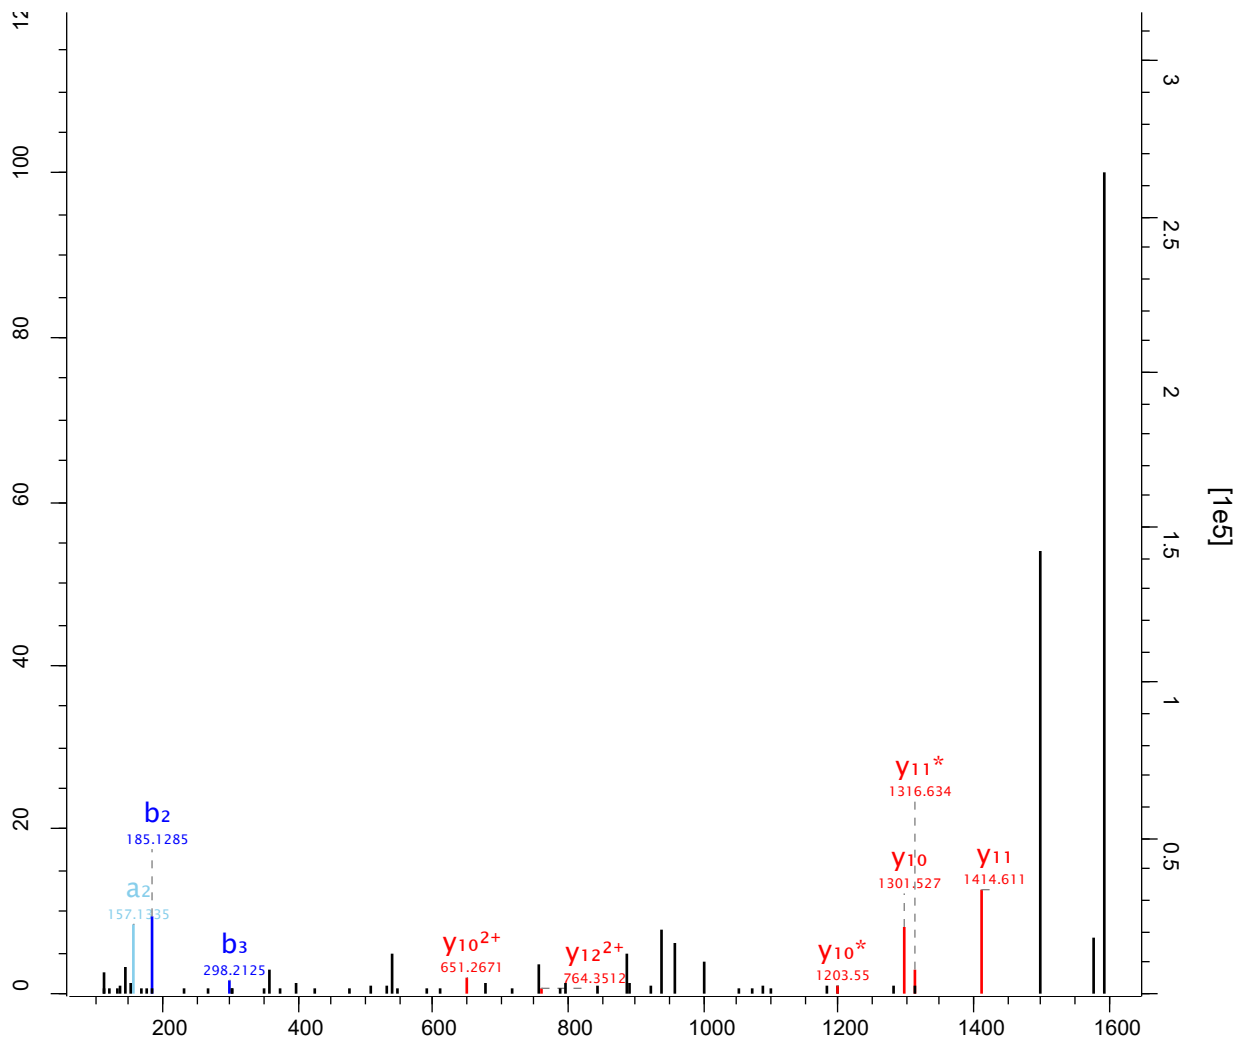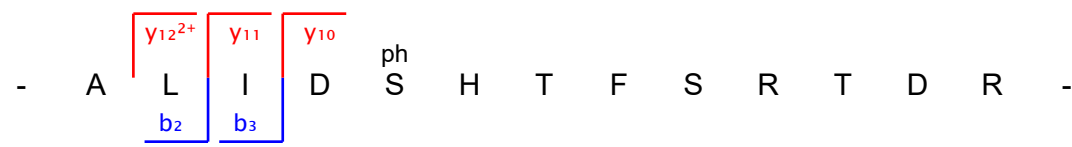

Raw file Scan Method Score m/z  
 sys\_00\_3short 22454 FTMS; HCD 225.29 782.89

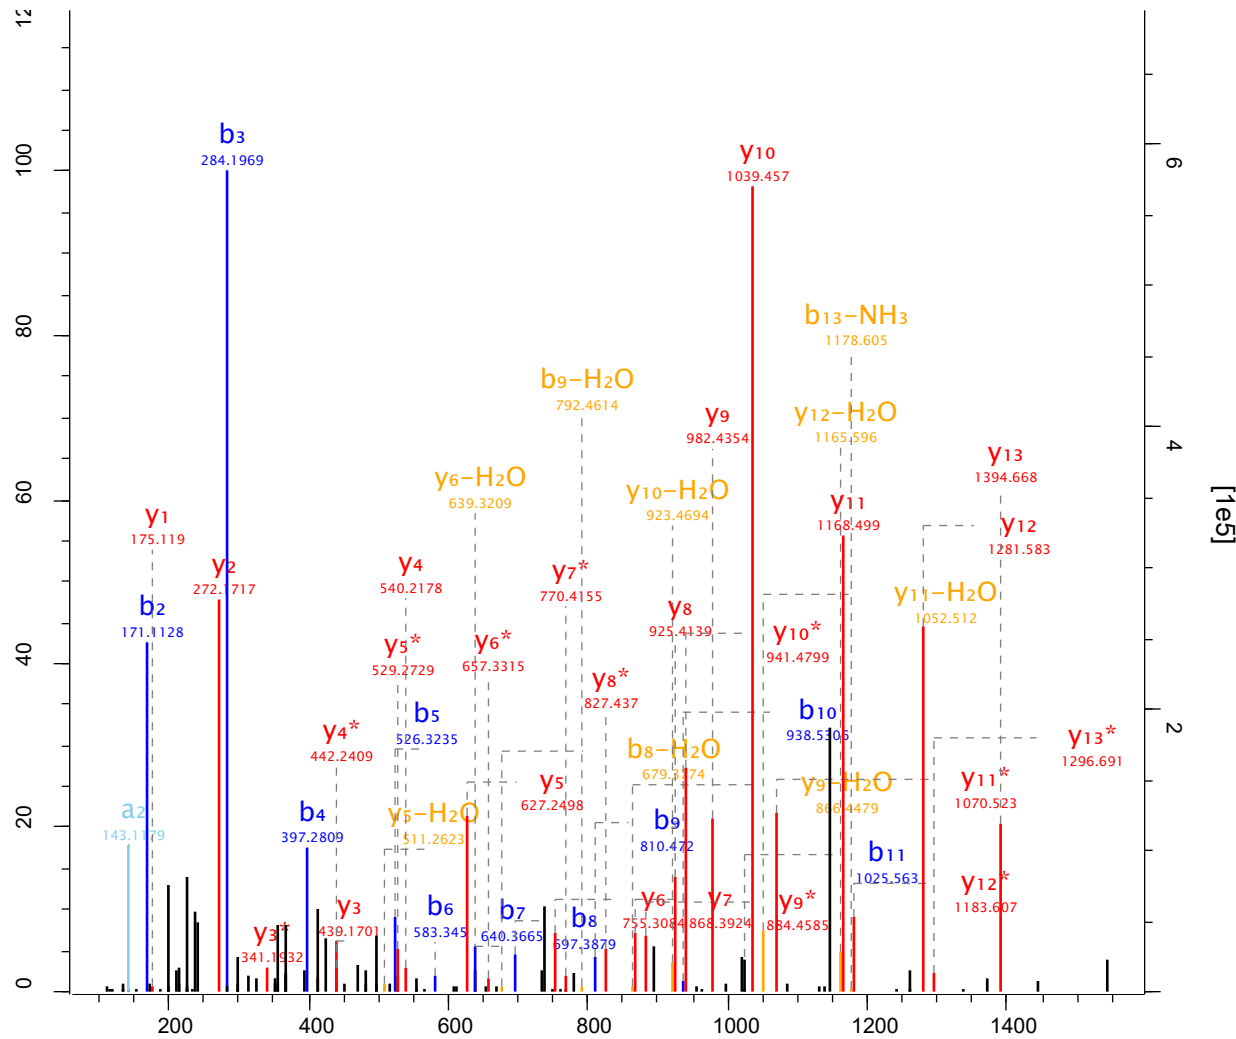

A V L L E G G G L Q S T S P R  
 b2 b3 b4 b5 b6 b7 b8 b9 b10 b11  
 y13 y12 y11 y10 y9 y8 y7 y6 y5 y4 y3 ph y2 y1

Raw file Scan Method Score m/z  
 sys\_00\_3short 22513 FTMS; HCD 65.42 795.33

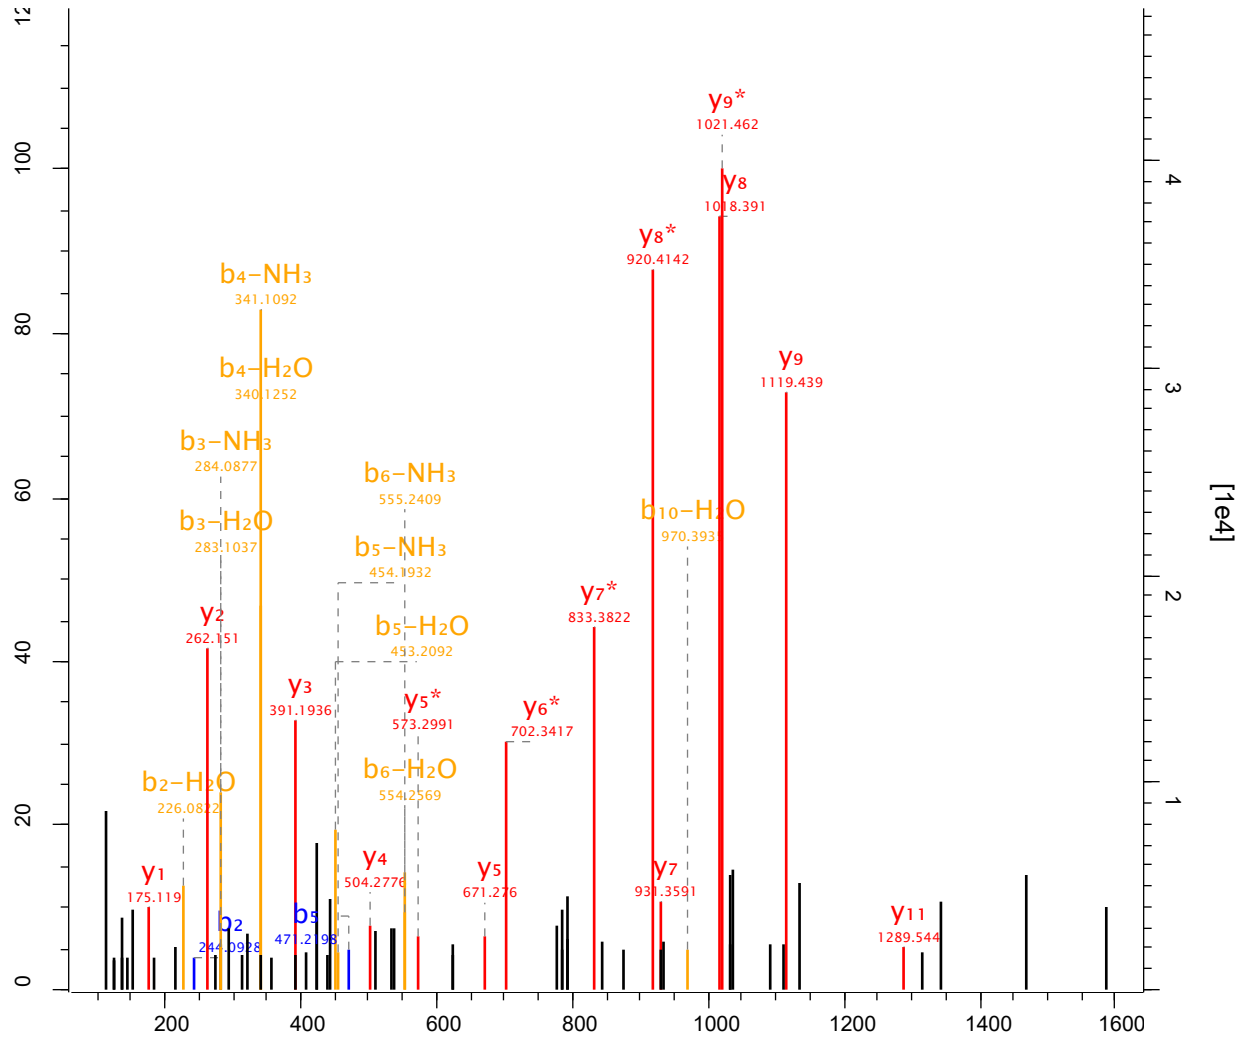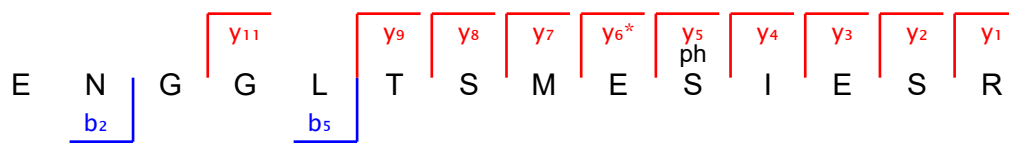



Raw file Scan Method Score m/z  
 sys\_00\_3short 22647 FTMS; HCD 159.18 715.3

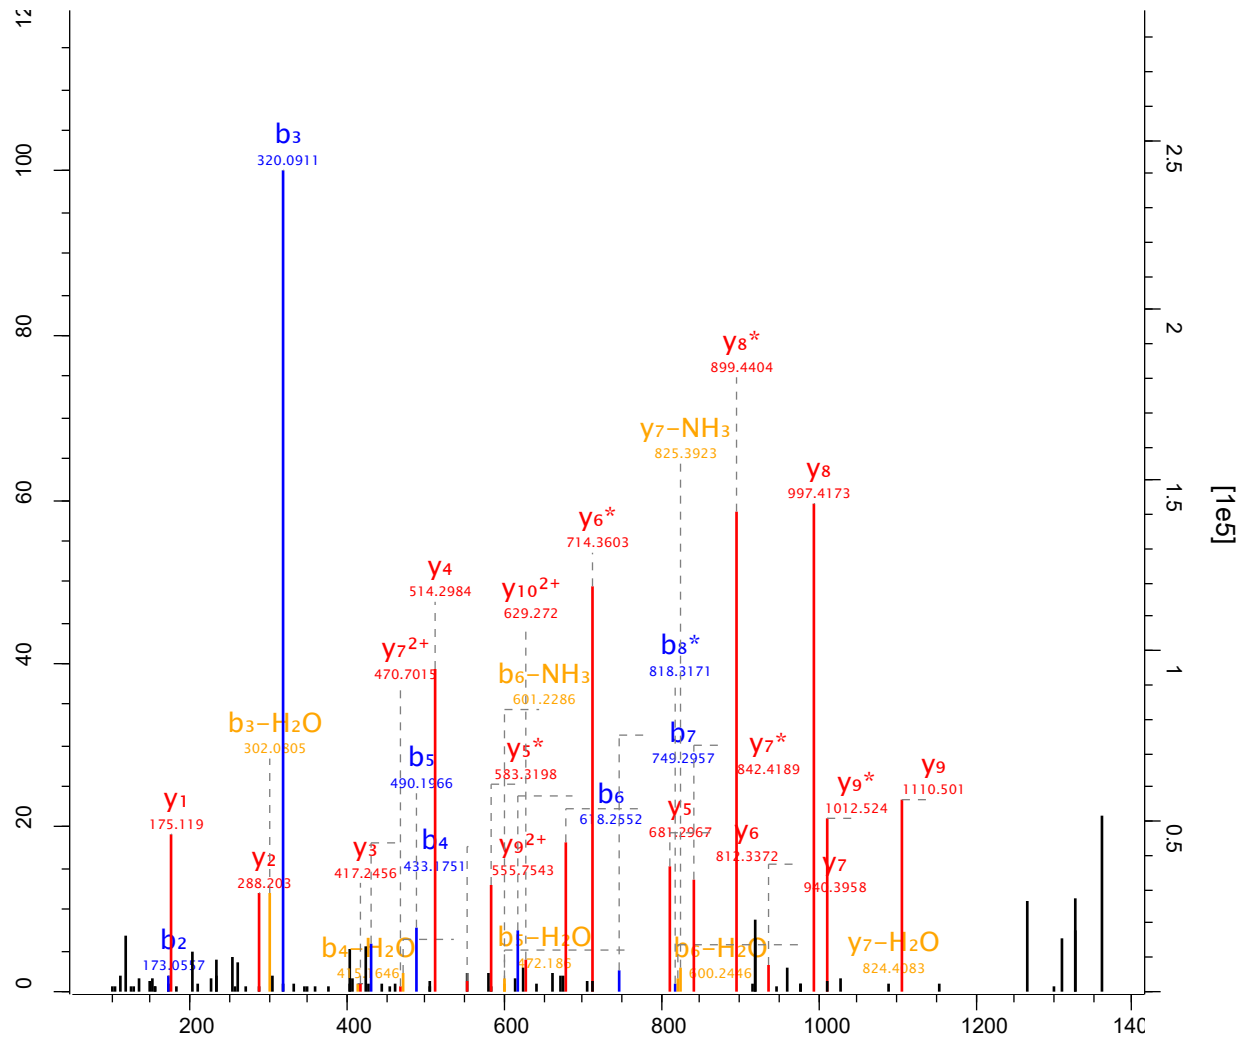

- D G M L G Q M S P E I R -

b<sub>2</sub>
b<sub>3</sub>
b<sub>4</sub>
b<sub>5</sub>
b<sub>6</sub>
b<sub>7</sub>
b<sub>8</sub><sup>\*</sup>
y<sub>10</sub><sup>2+</sup>
y<sub>9</sub>
y<sub>8</sub>
y<sub>7</sub>
y<sub>6</sub>
y<sub>5</sub>
y<sub>4</sub>
y<sub>3</sub>
y<sub>2</sub>
y<sub>1</sub>

Raw file Scan Method Score m/z  
 sys\_00\_3short 22870 FTMS; HCD 159.64 713.83

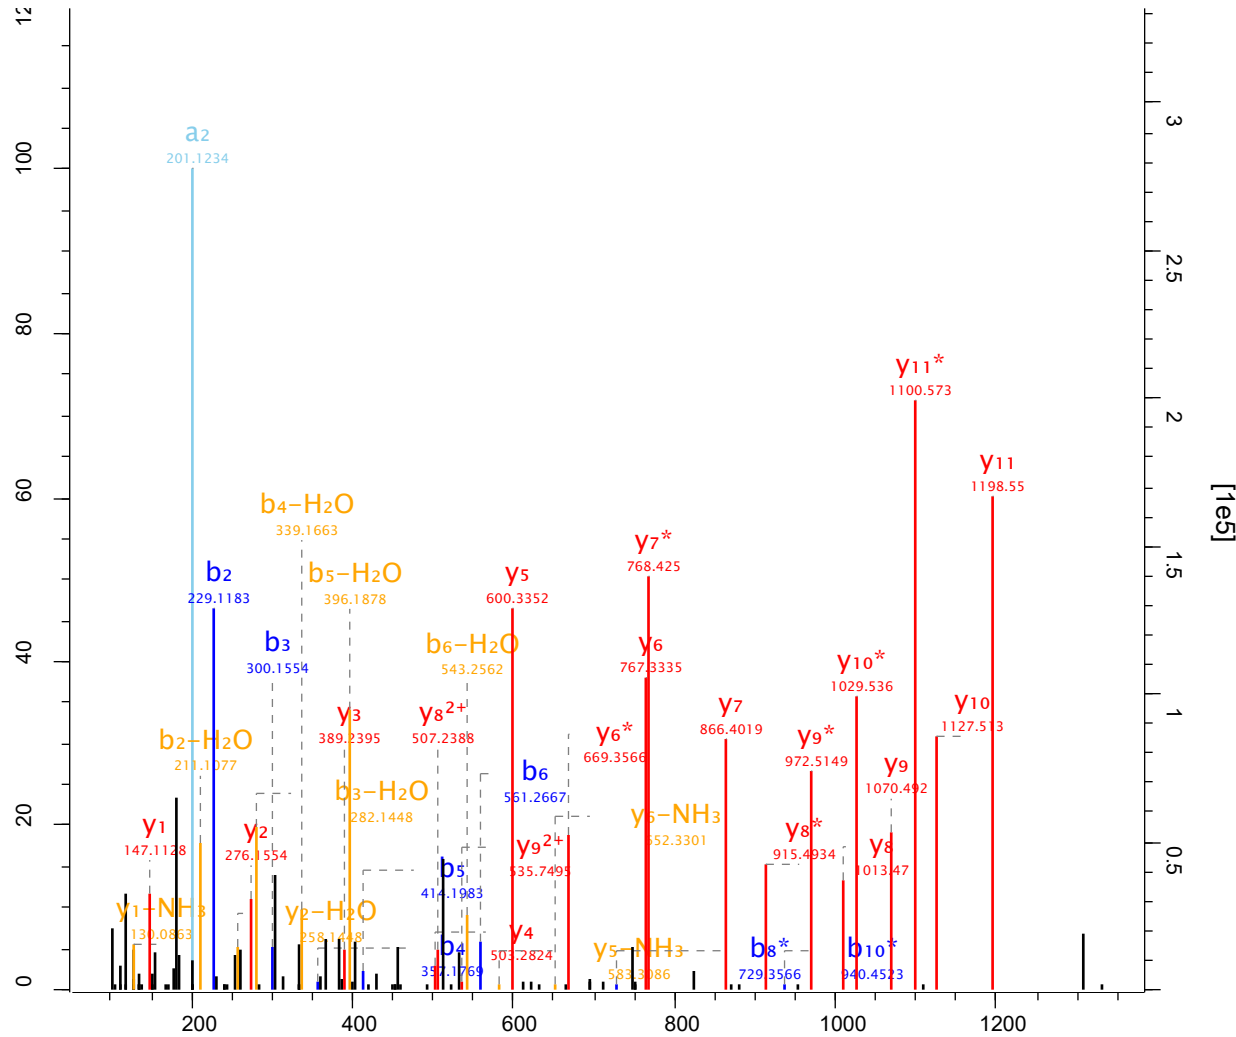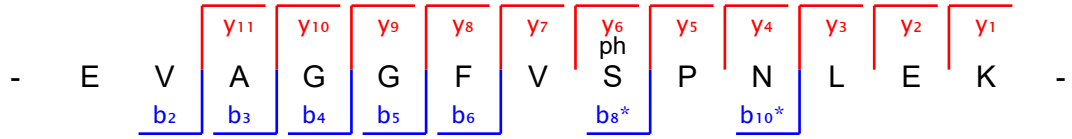

Raw file Scan Method Score m/z  
 sys\_00\_3short 23033 FTMS; HCD 119.18 938.37

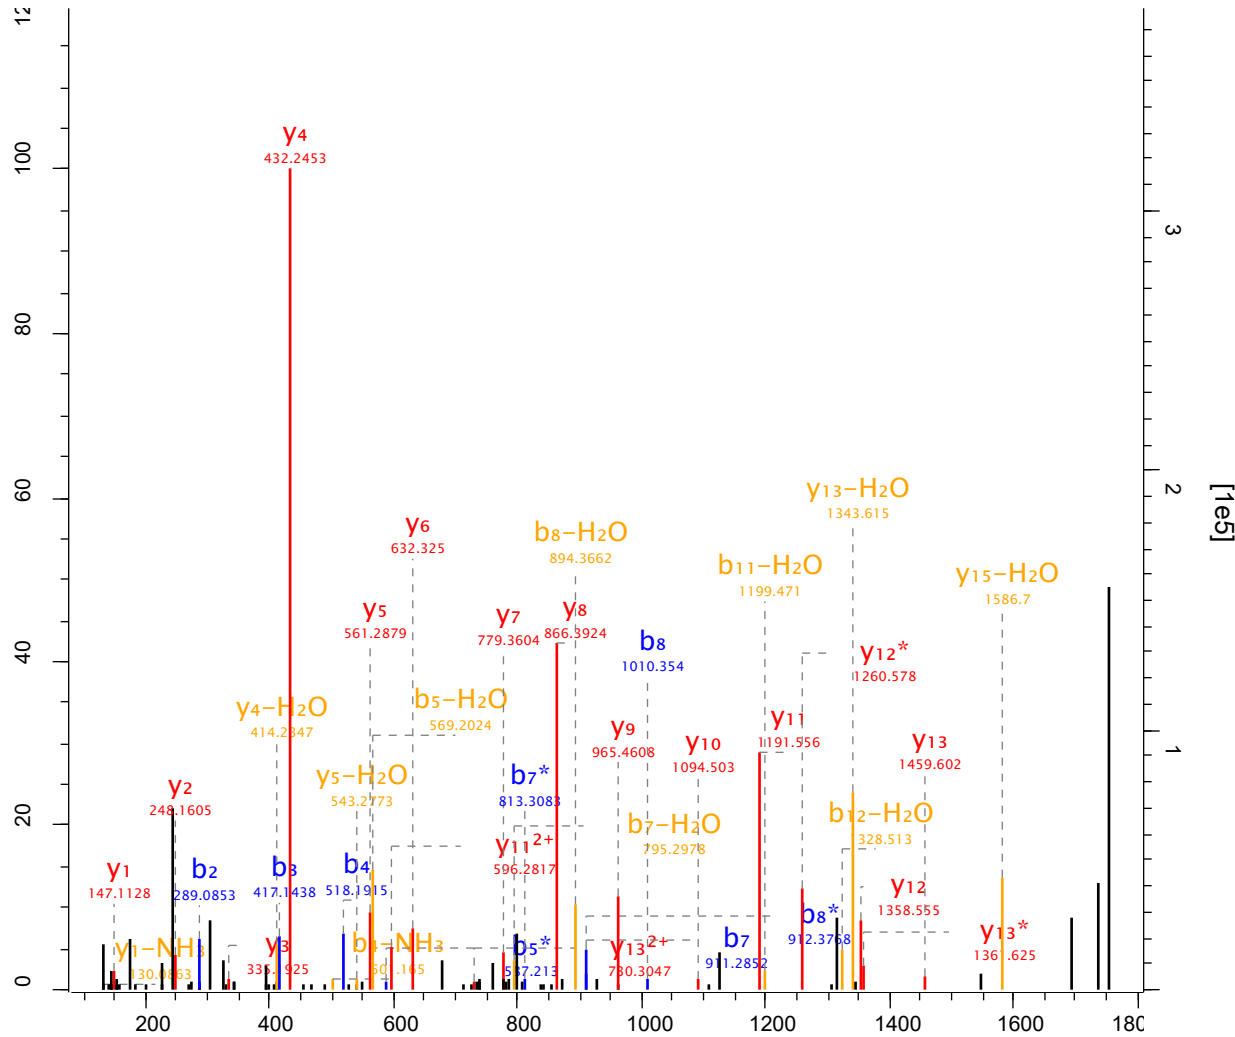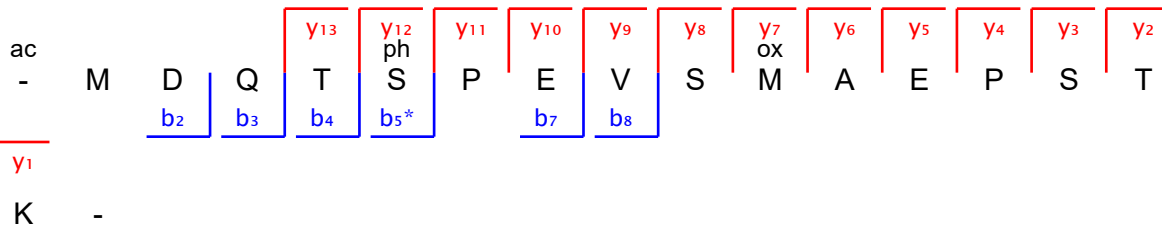

Raw file Scan Method Score m/z  
 sys\_00\_3short 23098 FTMS; HCD 43.76 700.81

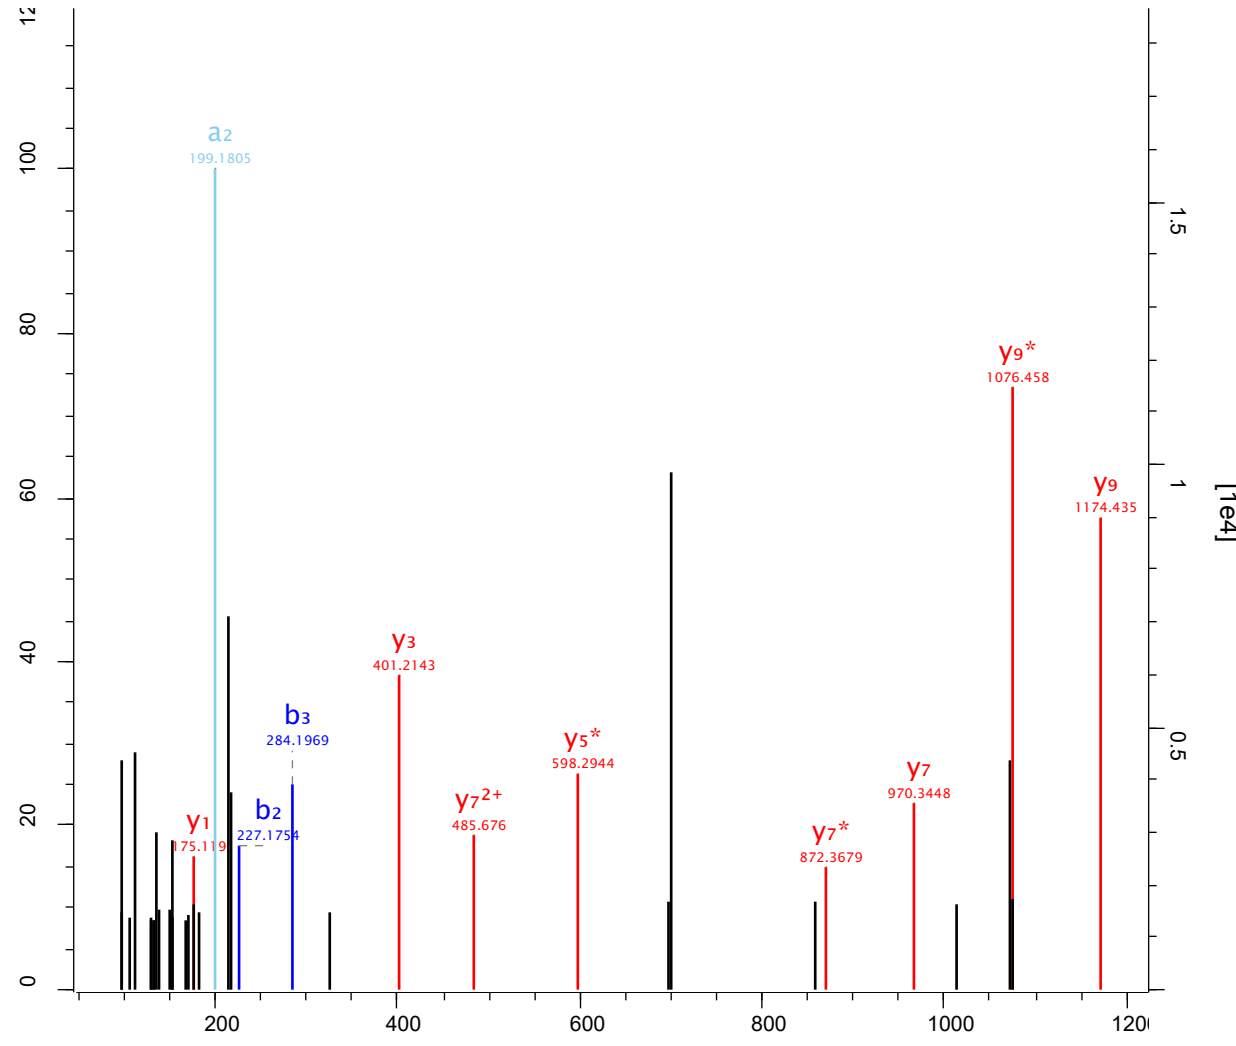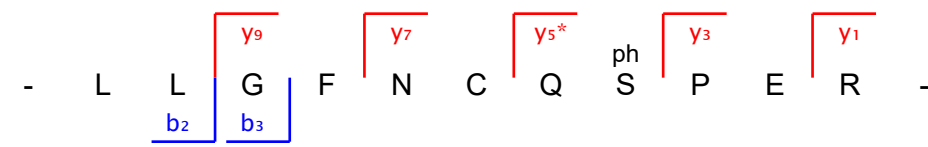

| Raw file      | Scan  | Method    | Score | m/z   |
|---------------|-------|-----------|-------|-------|
| sys_00_3short | 23160 | FTMS; HCD | 69.92 | 598.3 |

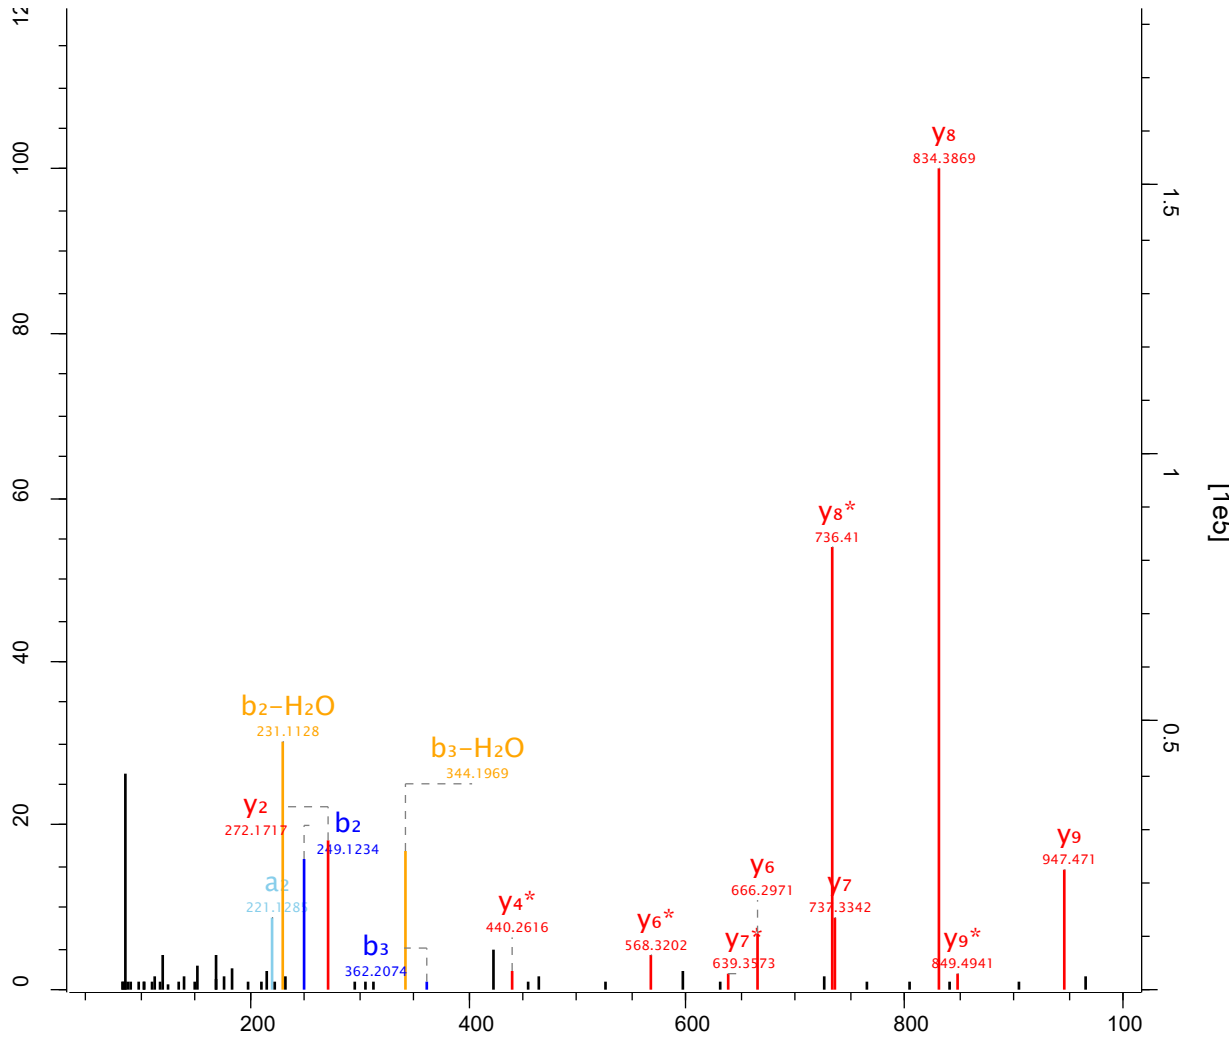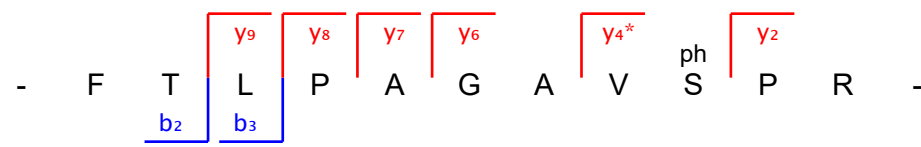

Raw file Scan Method Score m/z  
 sys\_00\_3short 24112 FTMS; HCD 147.12 794.37

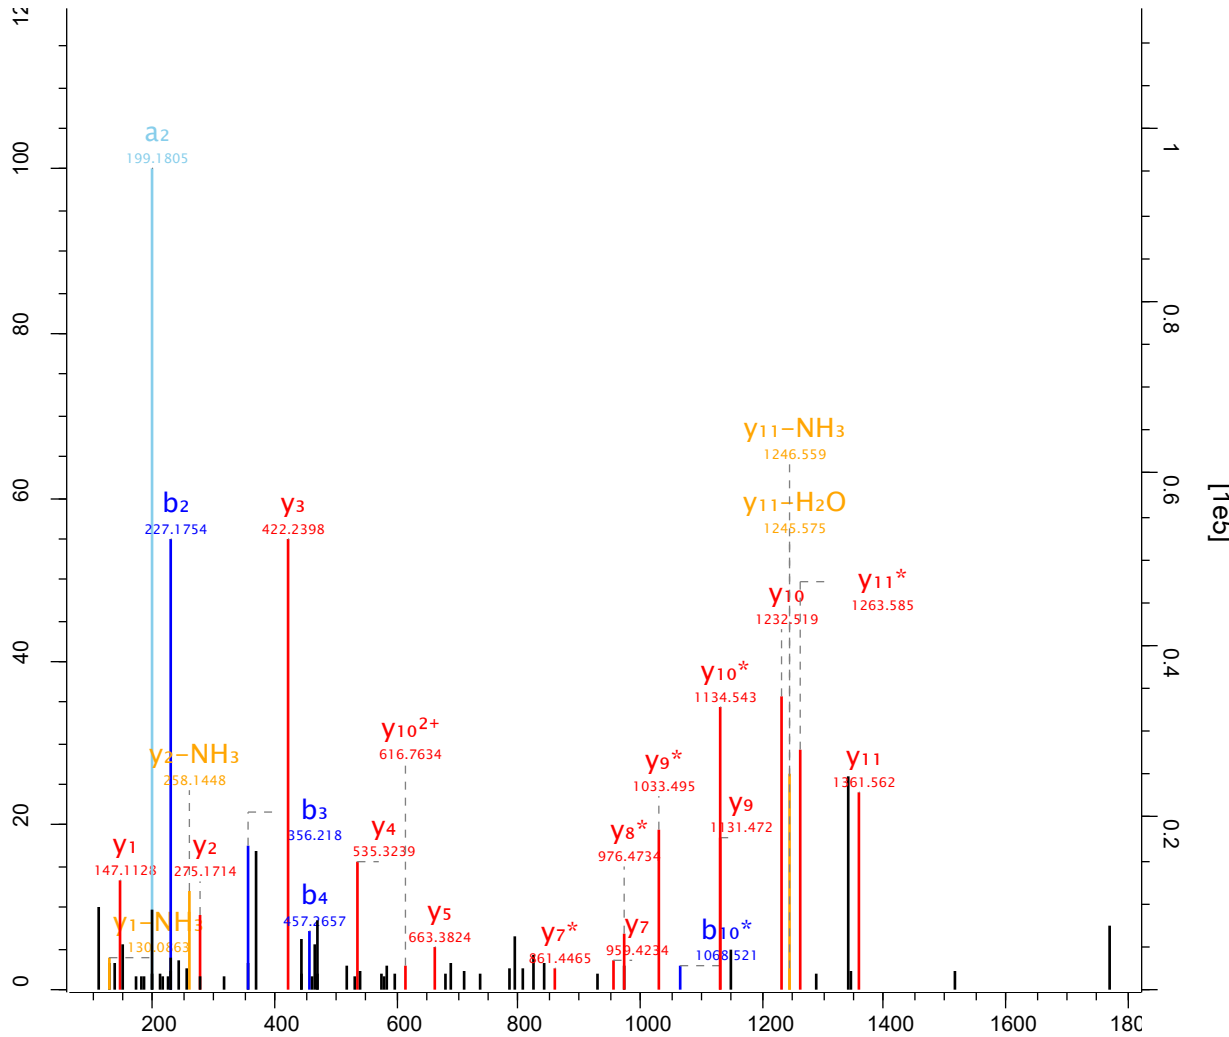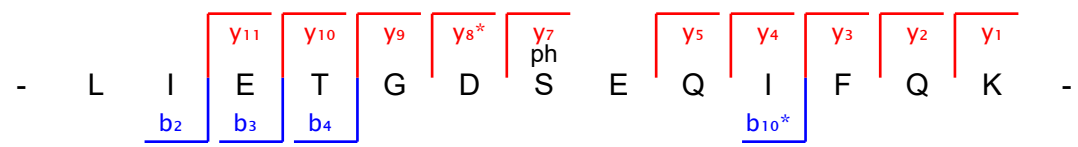

Raw file Scan Method Score m/z  
 sys\_00\_3short 24350 FTMS; HCD 142.45 1049.93

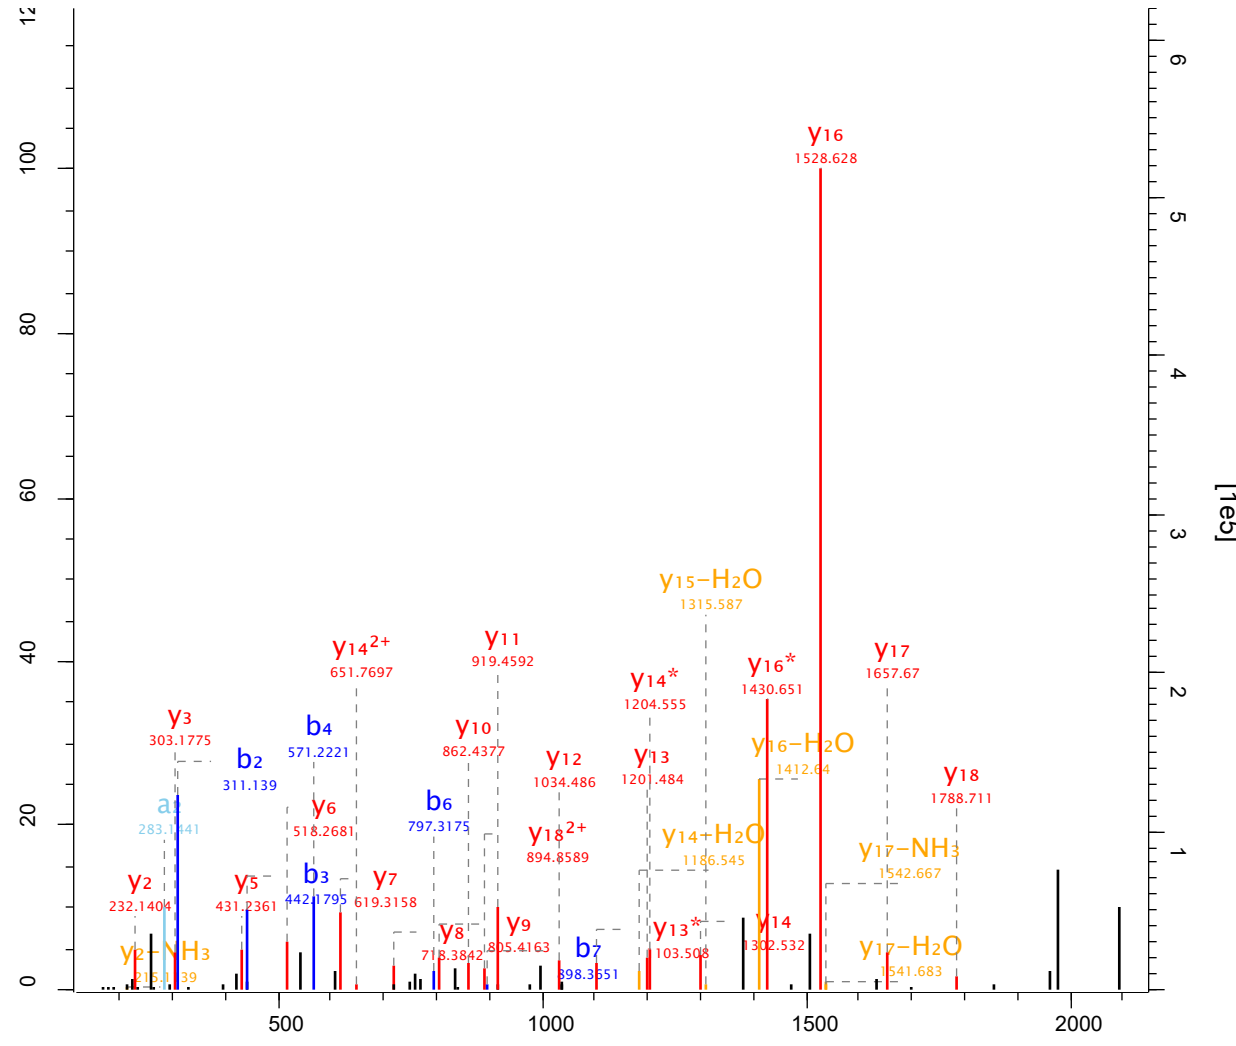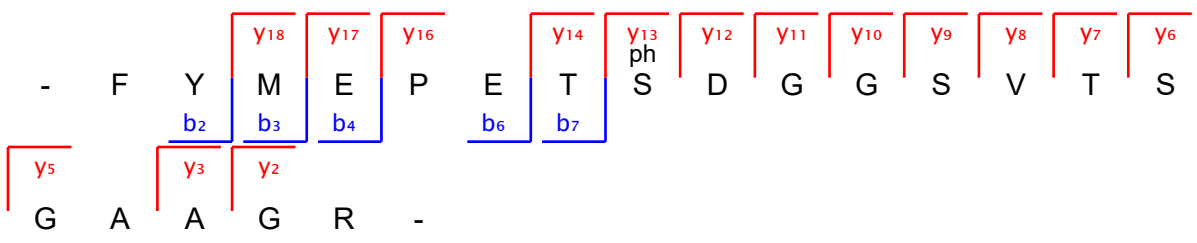

Raw file Scan Method Score m/z  
 sys\_00\_3short 24723 FTMS; HCD 180.27 706.34

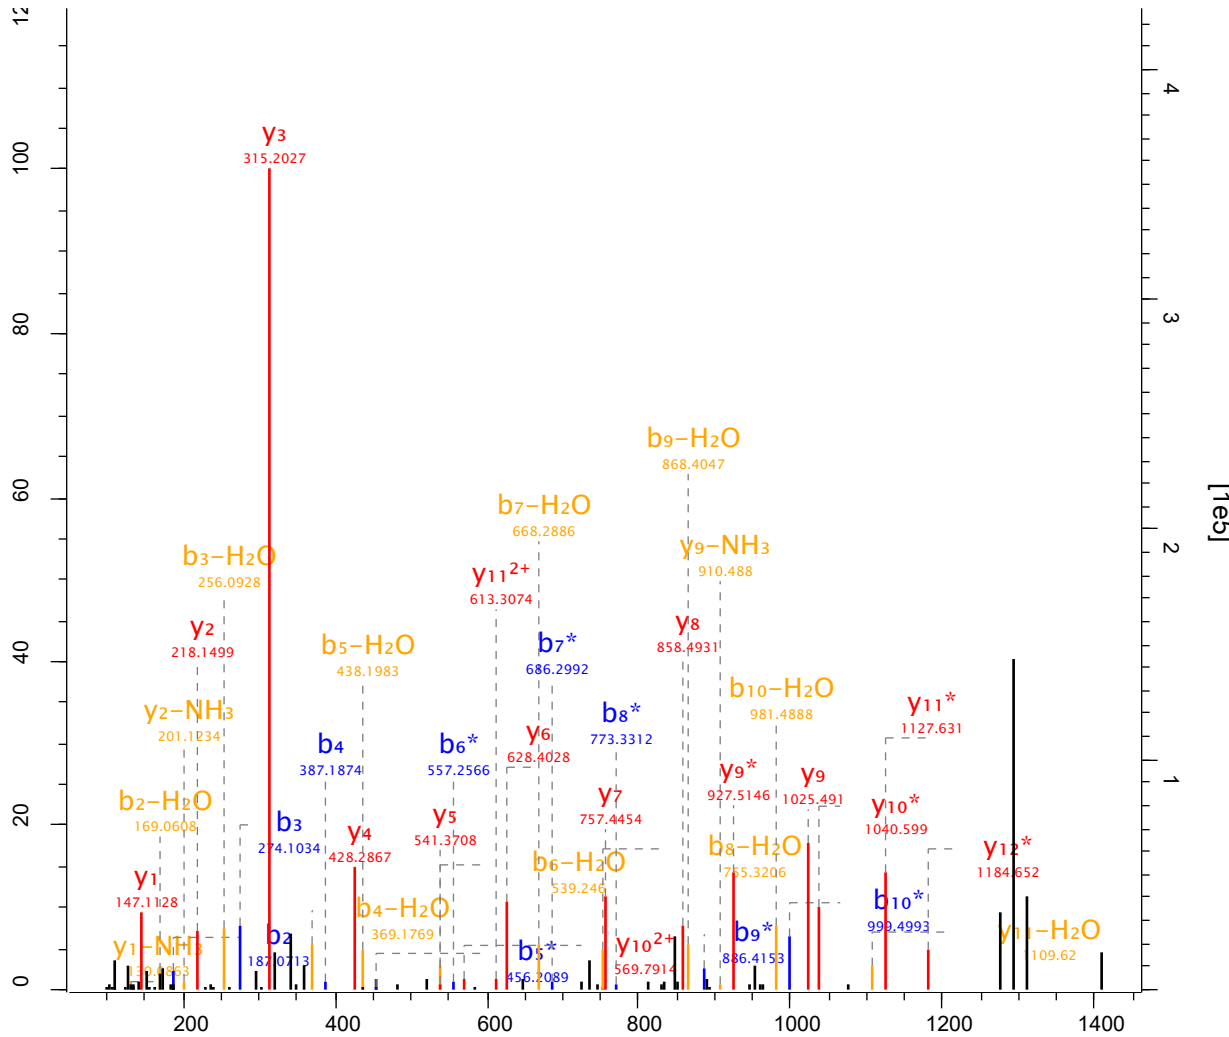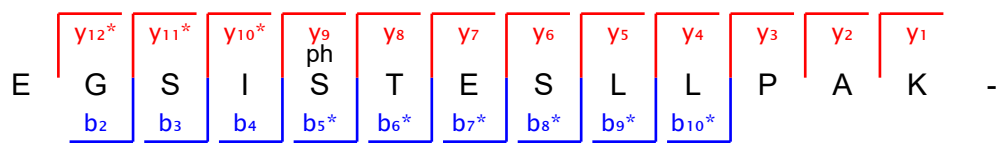



Raw file Scan Method Score m/z  
 sys\_00\_3short 24865 FTMS; HCD 151.44 736.83

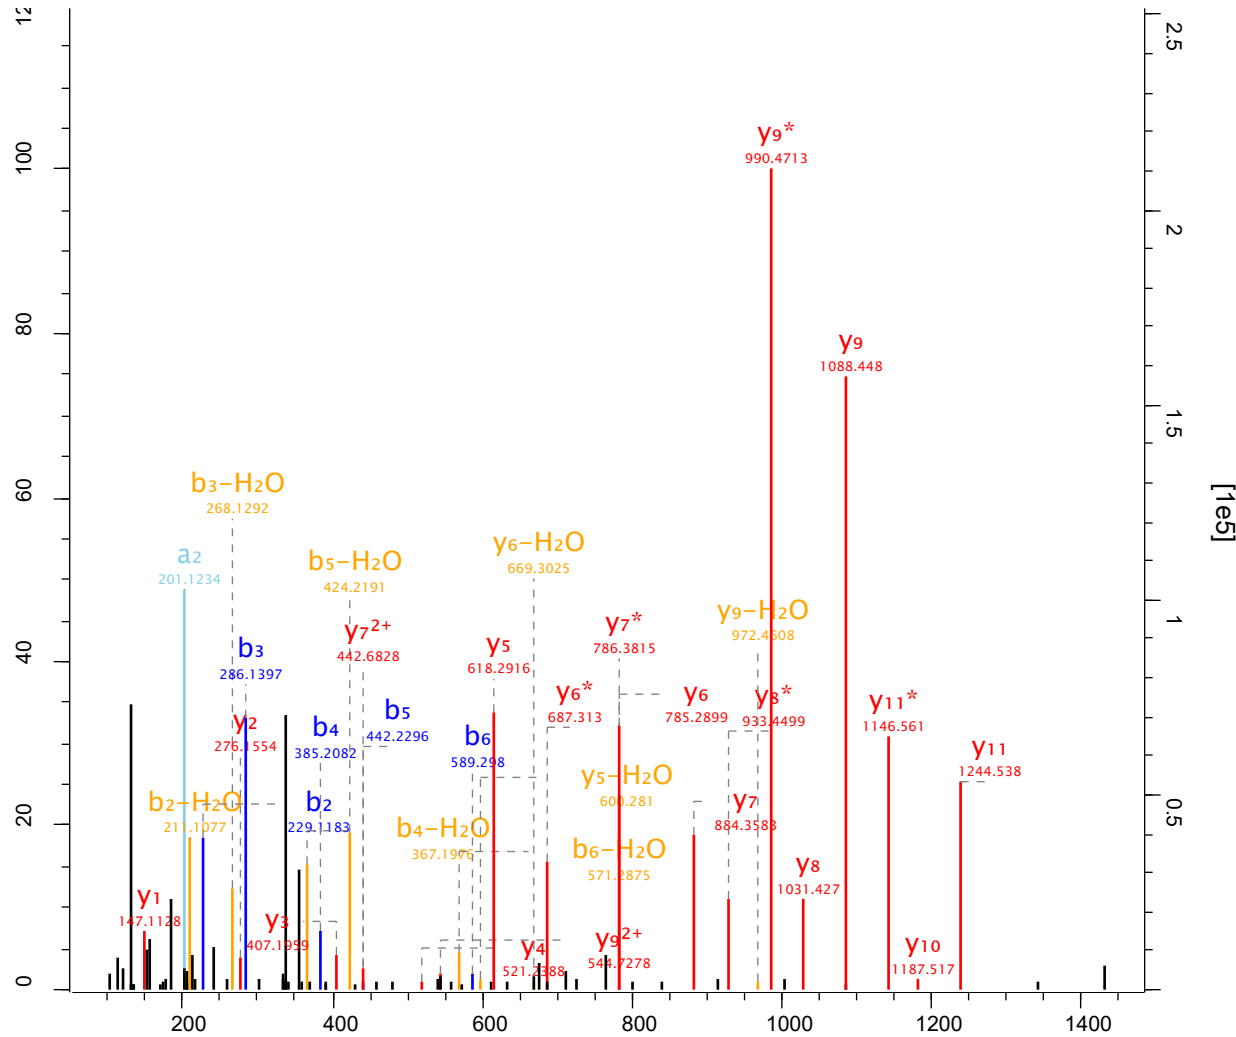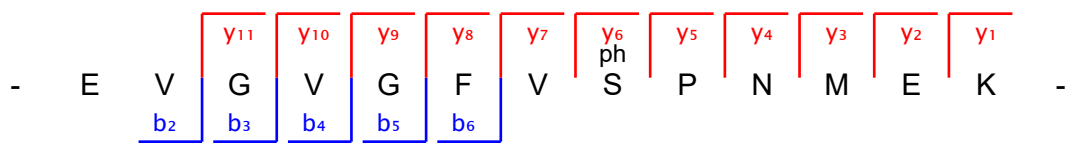

Raw file Scan Method Score m/z  
 sys\_00\_3short 24868 FTMS; HCD 116.86 683.32

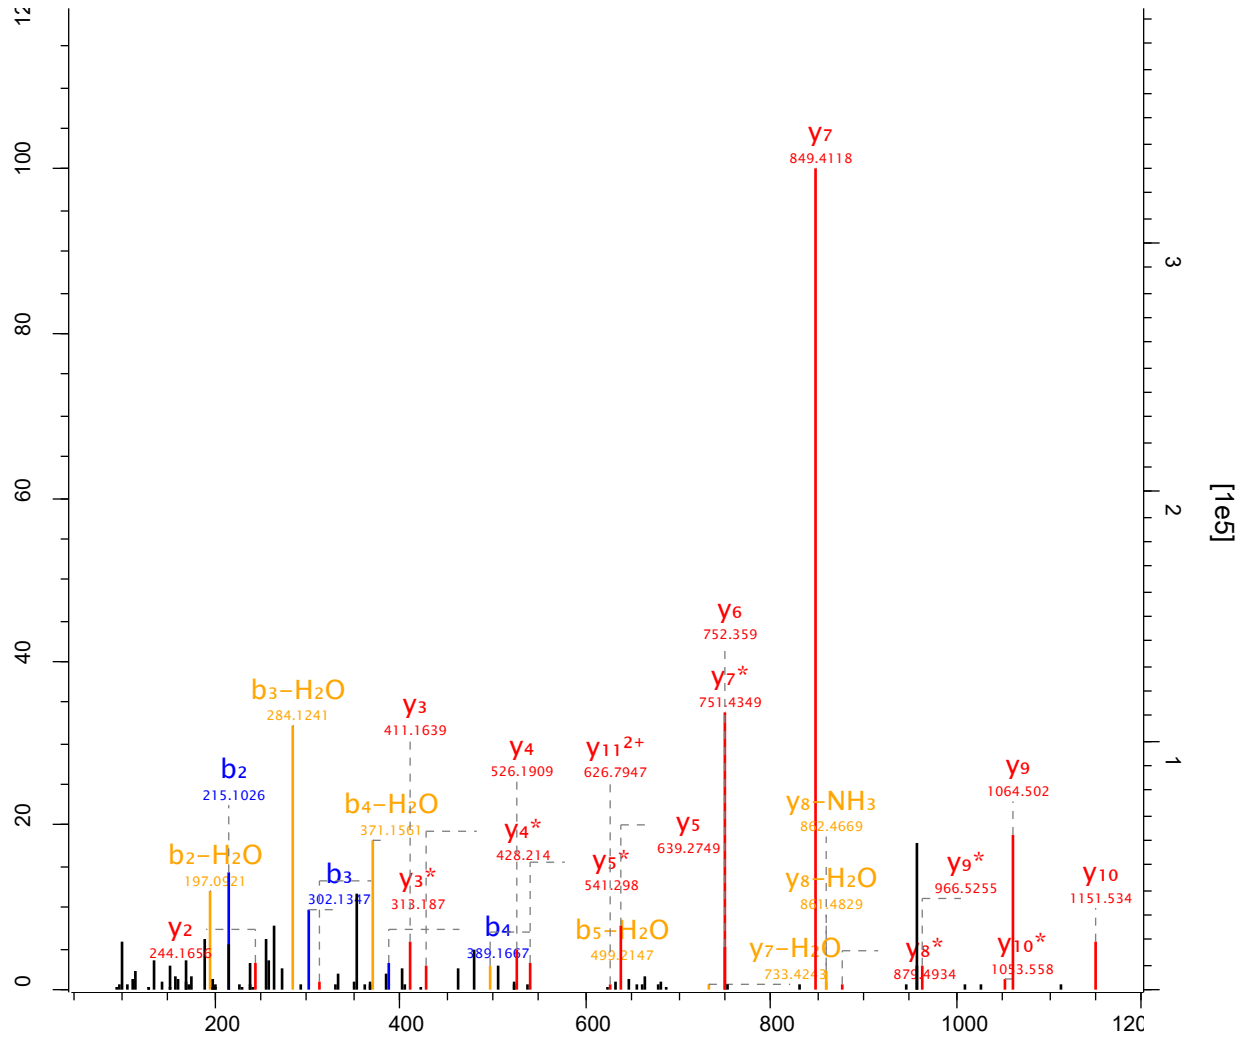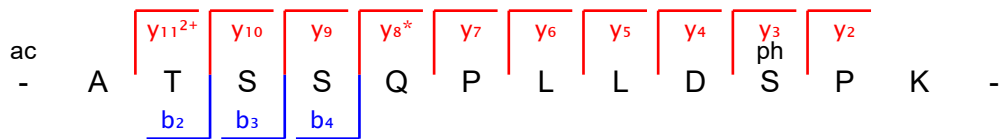

| Raw file      | Scan  | Method    | Score | m/z    |
|---------------|-------|-----------|-------|--------|
| sys_00_3short | 24908 | FTMS; HCD | 58.98 | 831.88 |

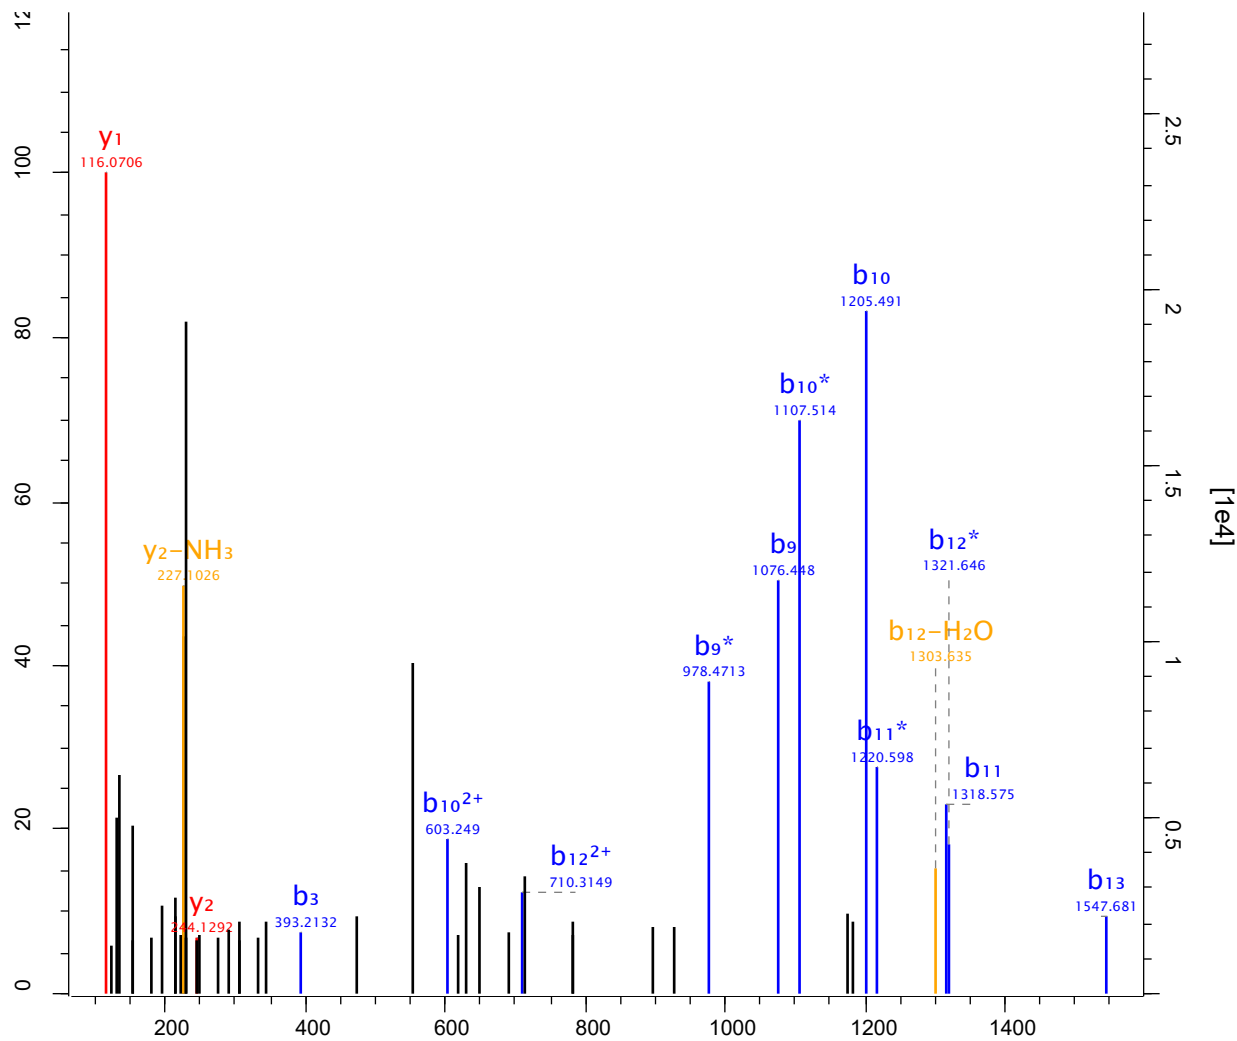

- K Y T S M G S Q I E L T Q P -

ph

b<sub>3</sub> b<sub>9</sub> b<sub>10</sub> b<sub>11</sub> b<sub>12</sub><sup>\*</sup> b<sub>13</sub> y<sub>2</sub> y<sub>1</sub>

Raw file Scan Method Score m/z  
 sys\_00\_3short 25096 FTMS; HCD 160.78 710.33

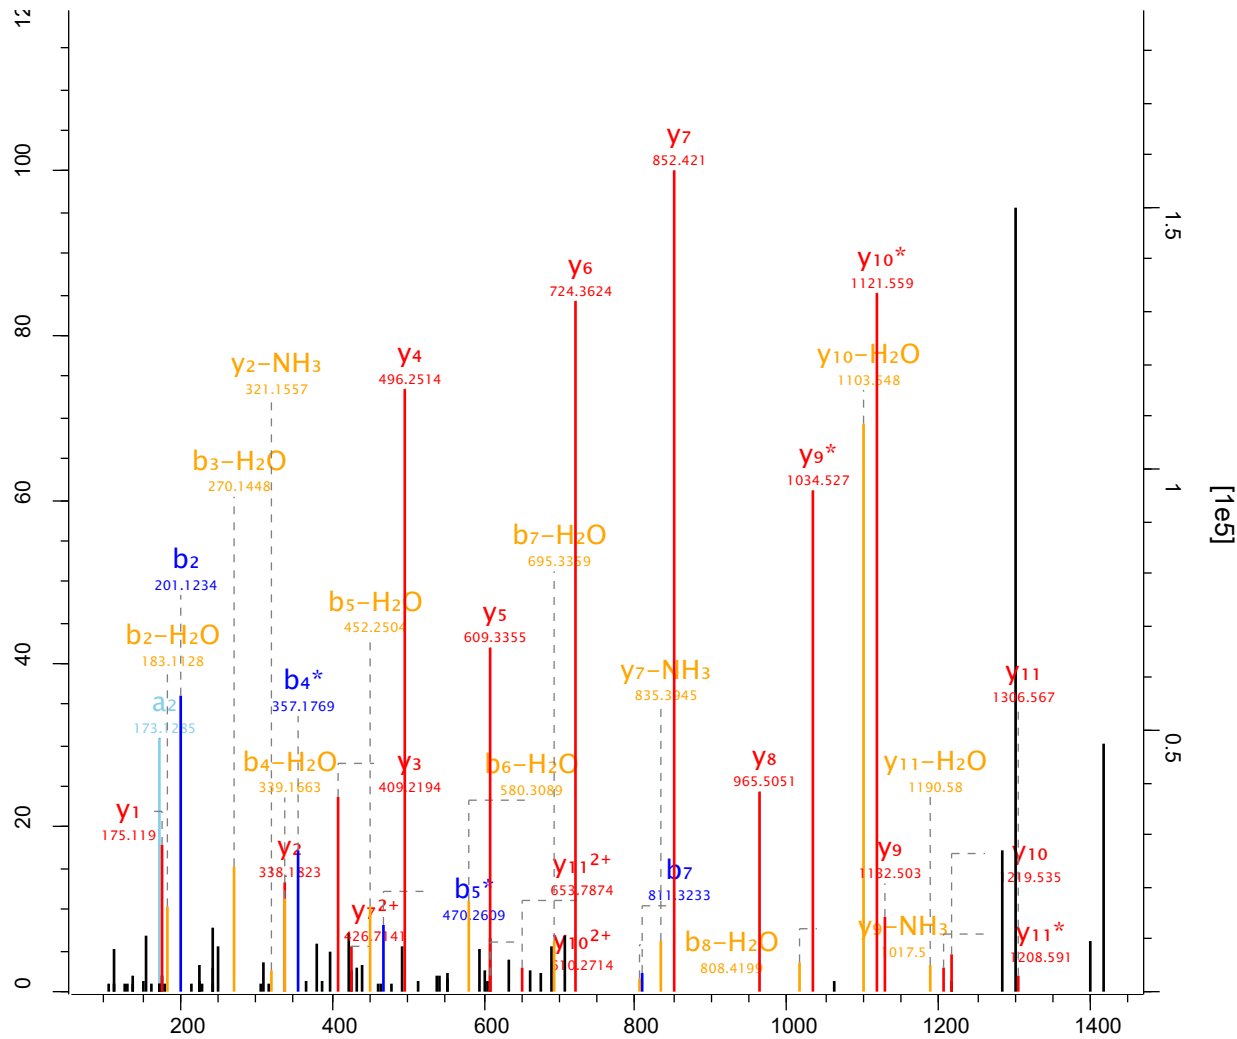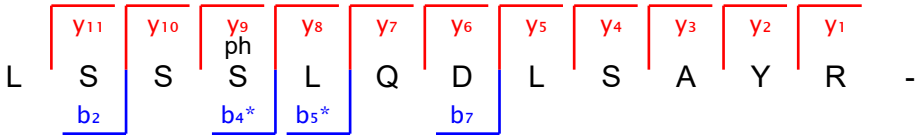

Raw file Scan Method Score m/z  
 sys\_00\_3short 25587 FTMS; HCD 218.11 799.9

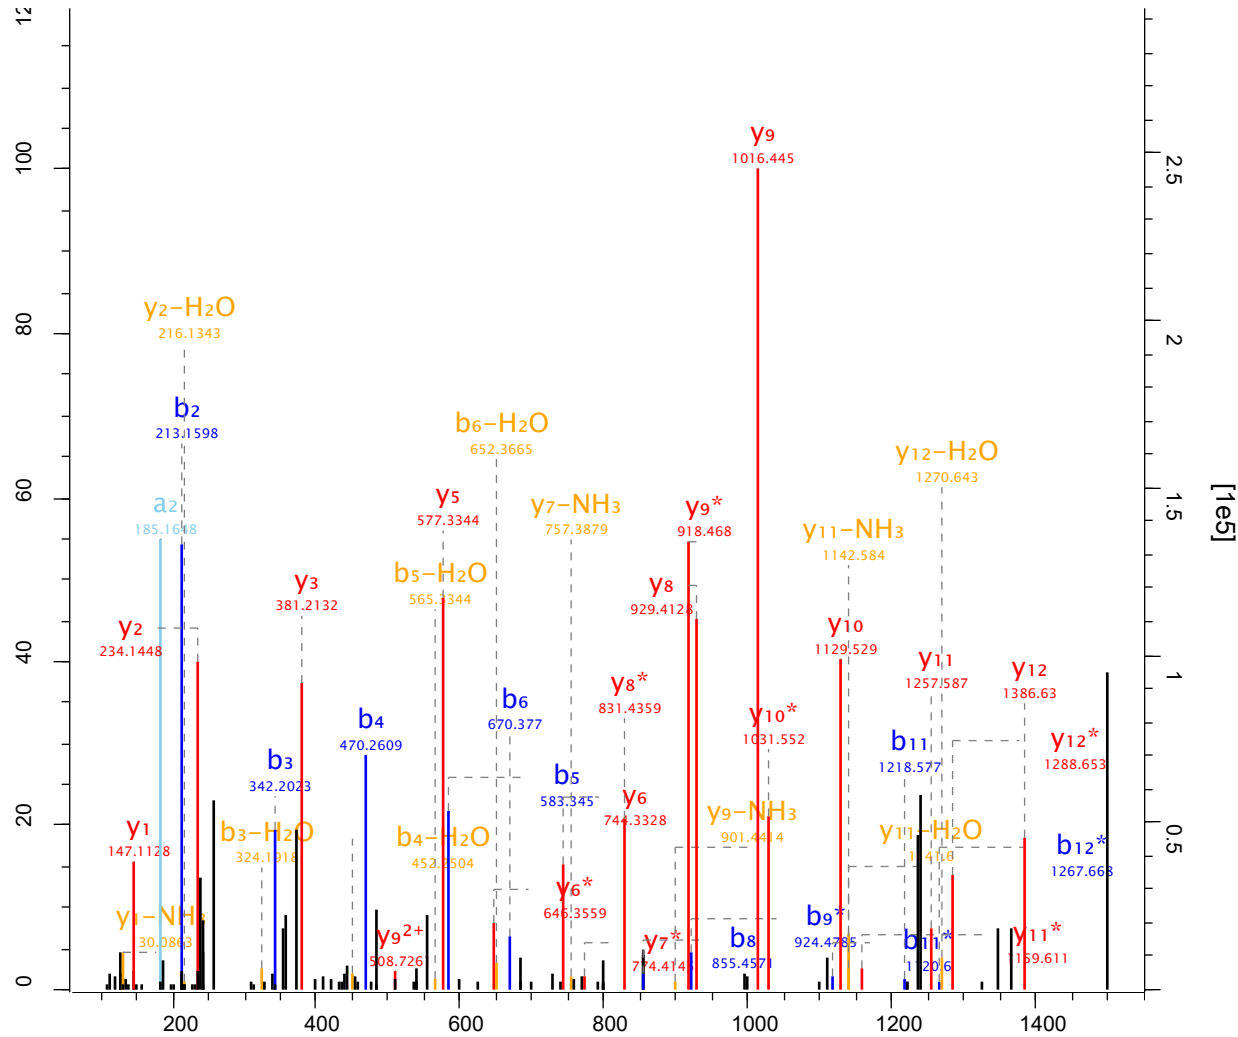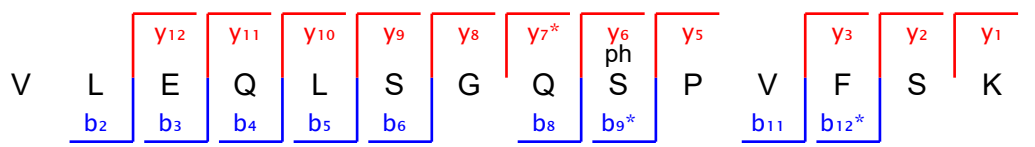

Raw file Scan Method Score m/z  
 sys\_00\_3short 25716 FTMS; HCD 124.25 795.35

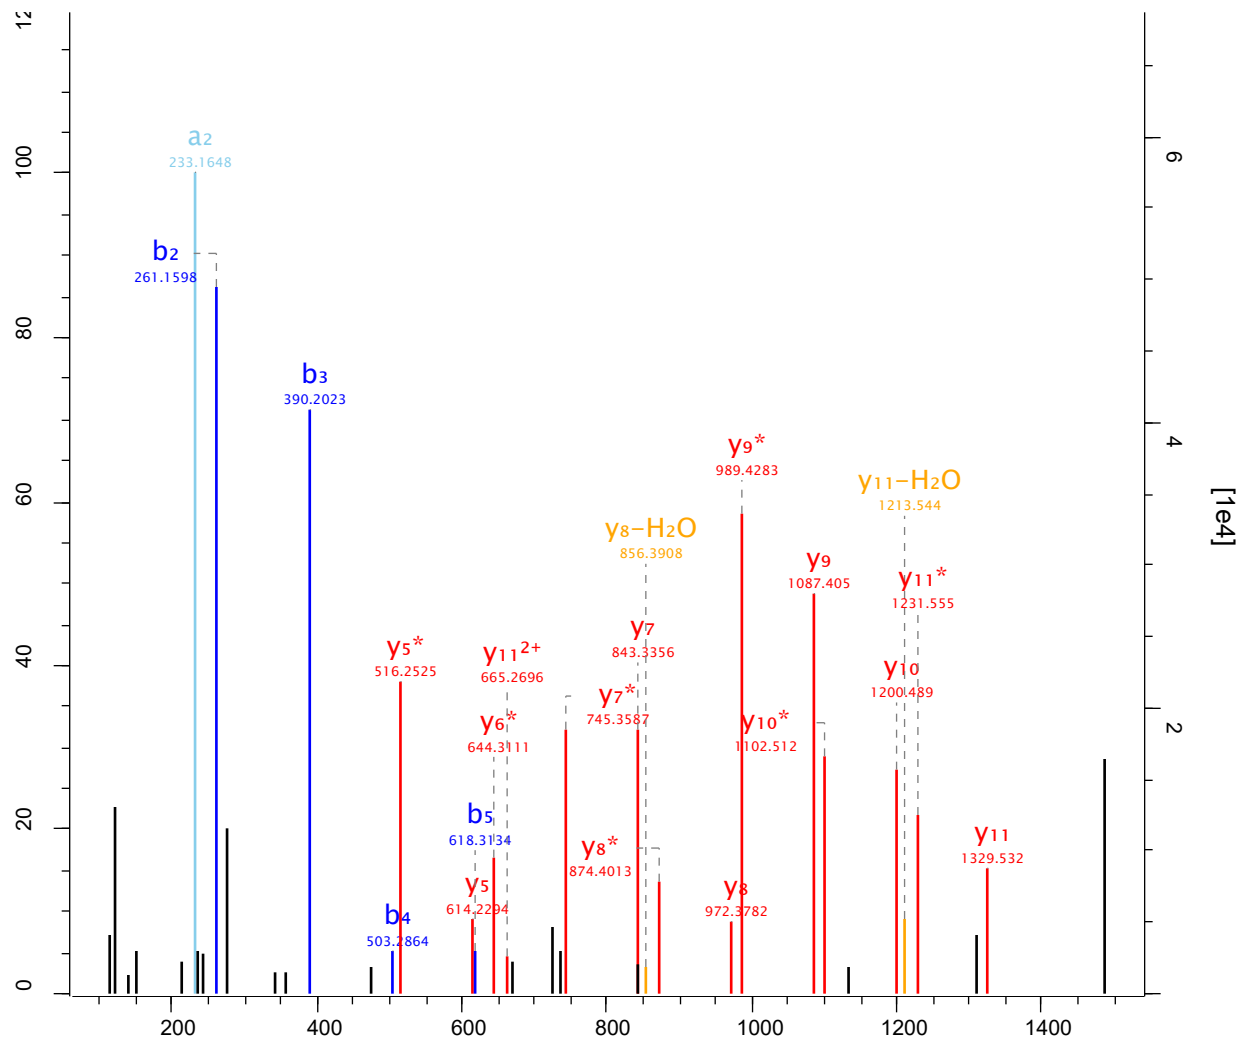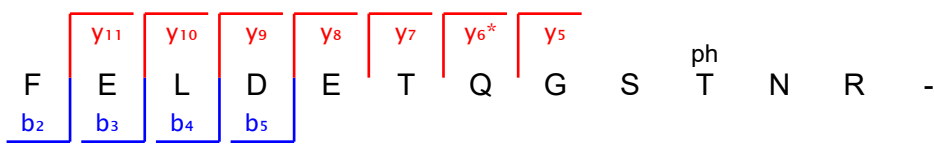

| Raw file      | Scan  | Method    | Score | m/z    |
|---------------|-------|-----------|-------|--------|
| sys_00_3short | 25762 | FTMS; HCD | 71.88 | 588.81 |

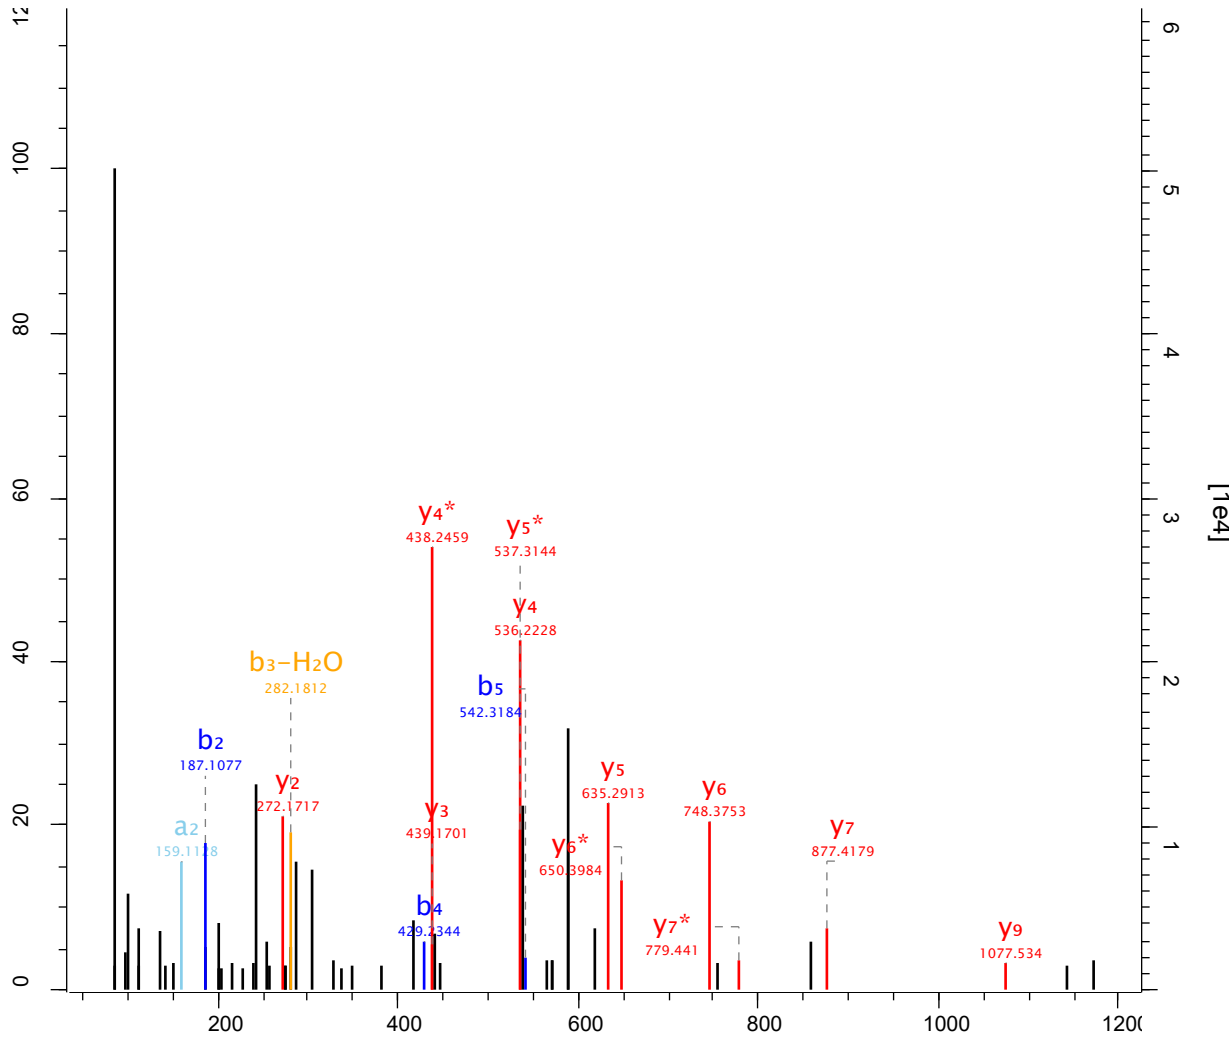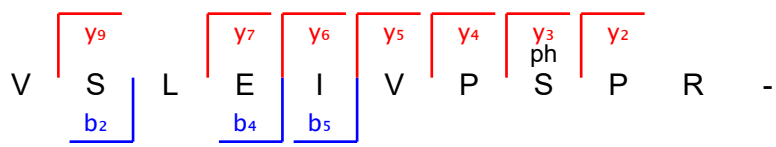

Raw file Scan Method Score m/z  
 sys\_00\_3short 25778 FTMS; HCD 161.21 598.3

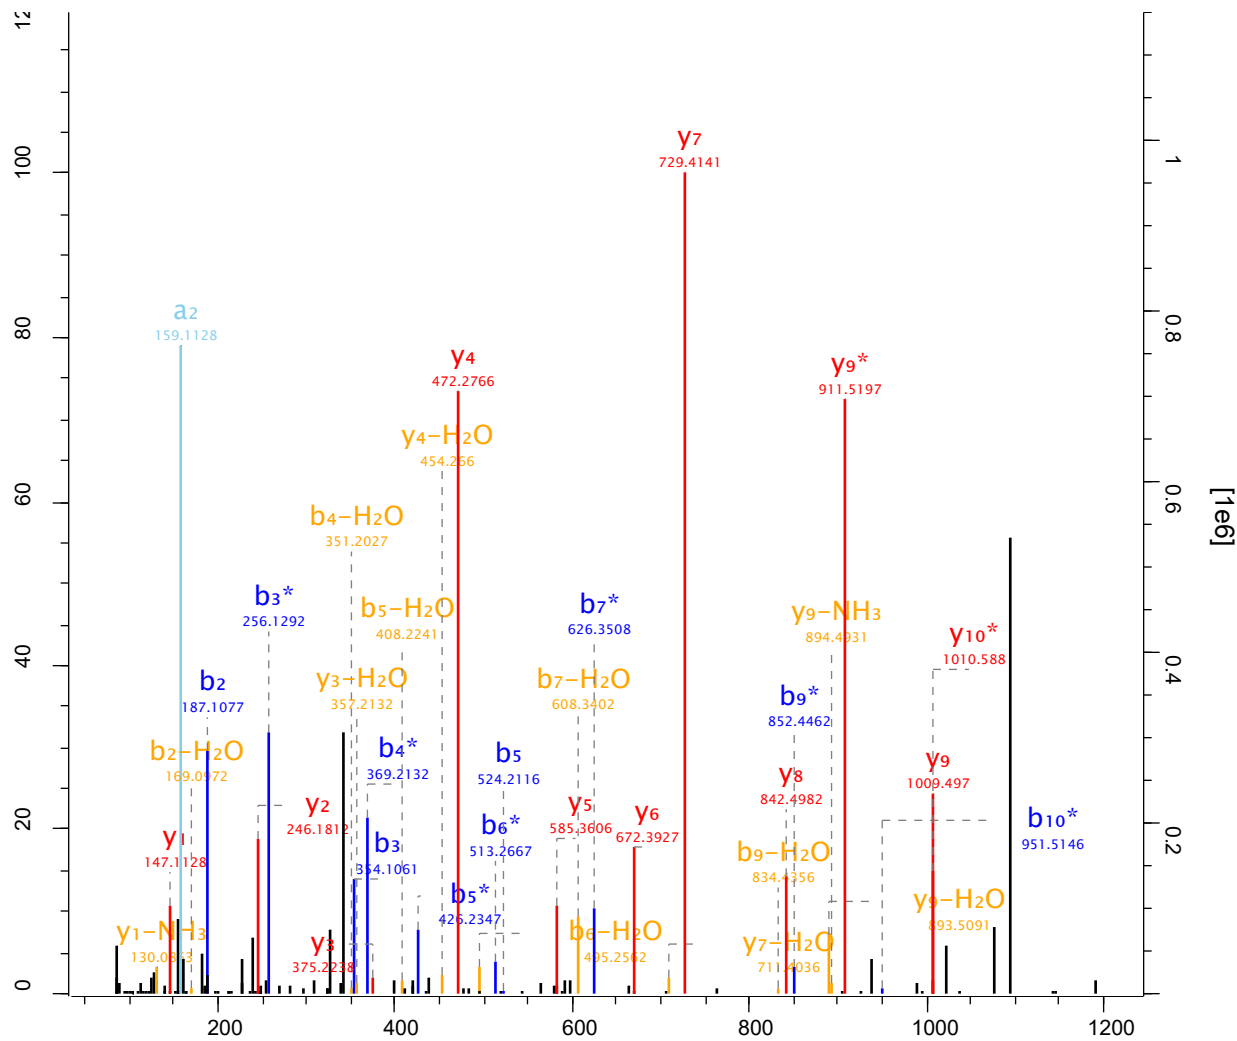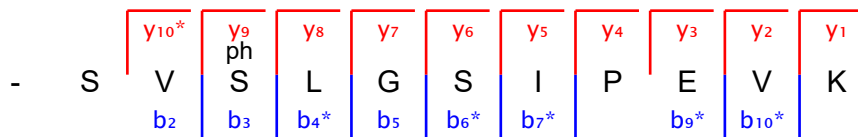



Raw file Scan Method Score m/z  
 sys\_00\_3short 25897 FTMS; HCD 73.69 729.69

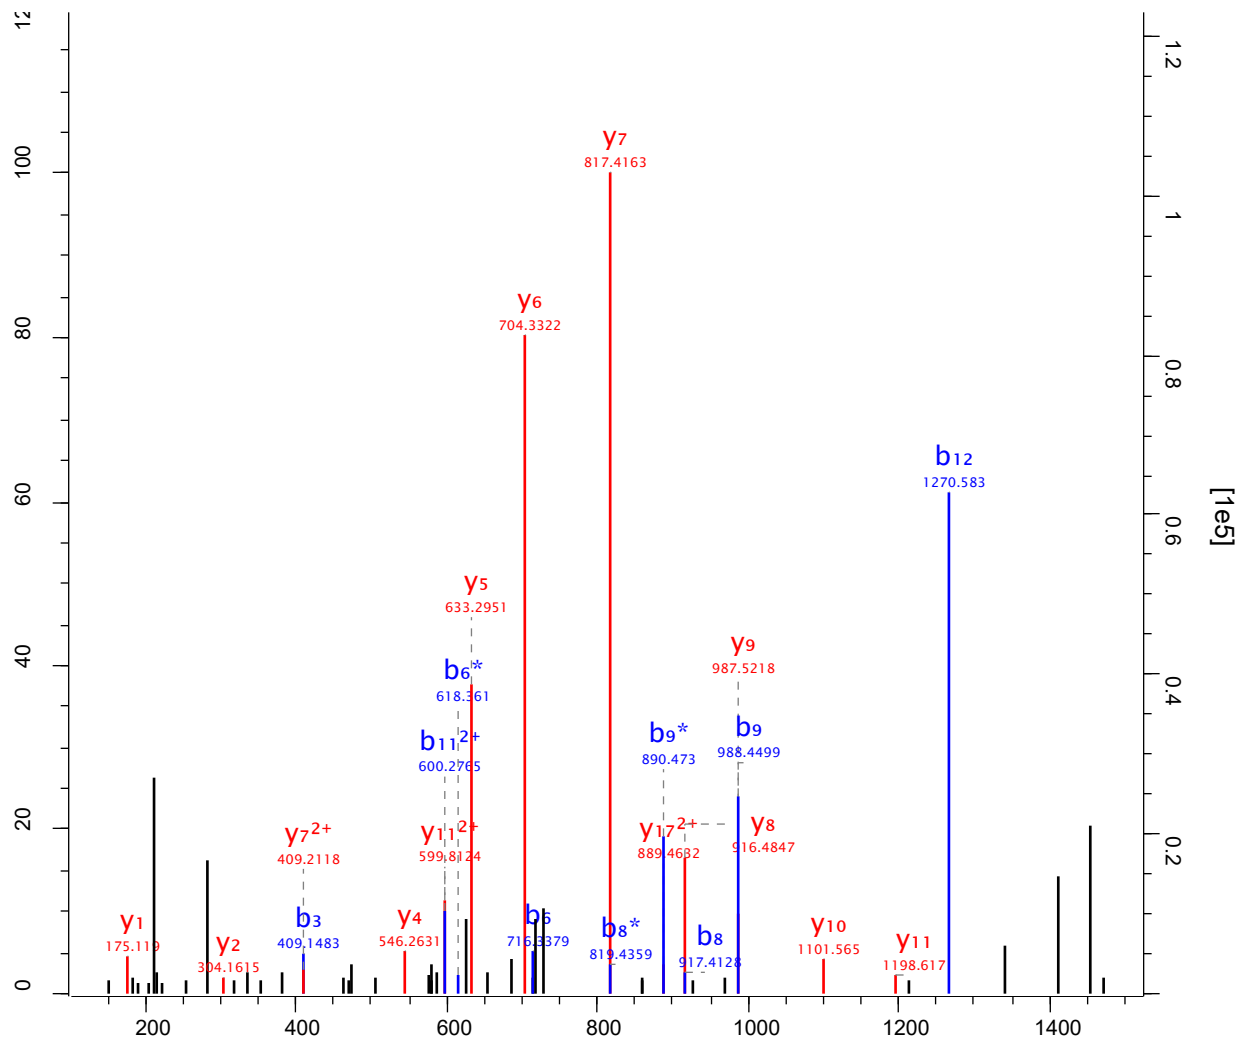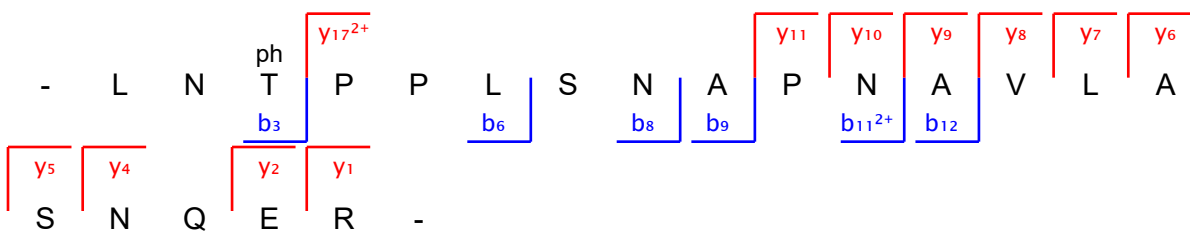

Raw file Scan Method Score m/z  
 sys\_00\_3short 25963 FTMS; HCD 109.44 639.75

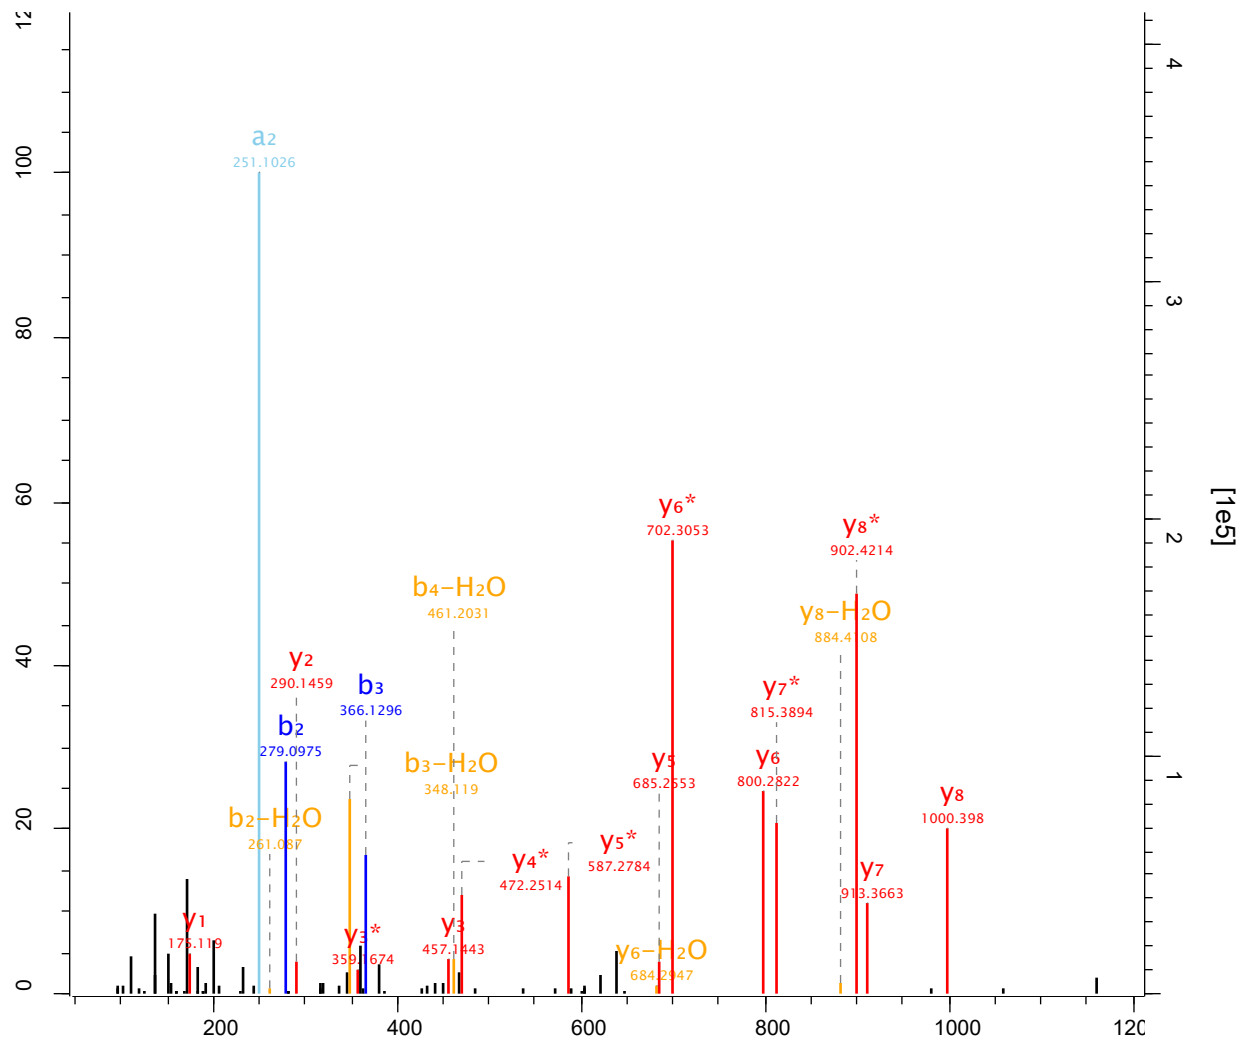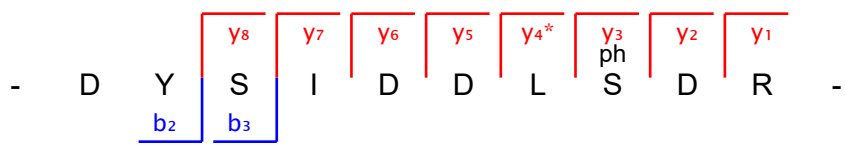

Raw file Scan Method Score m/z  
 sys\_00\_3short 25996 FTMS; HCD 58.32 601.28

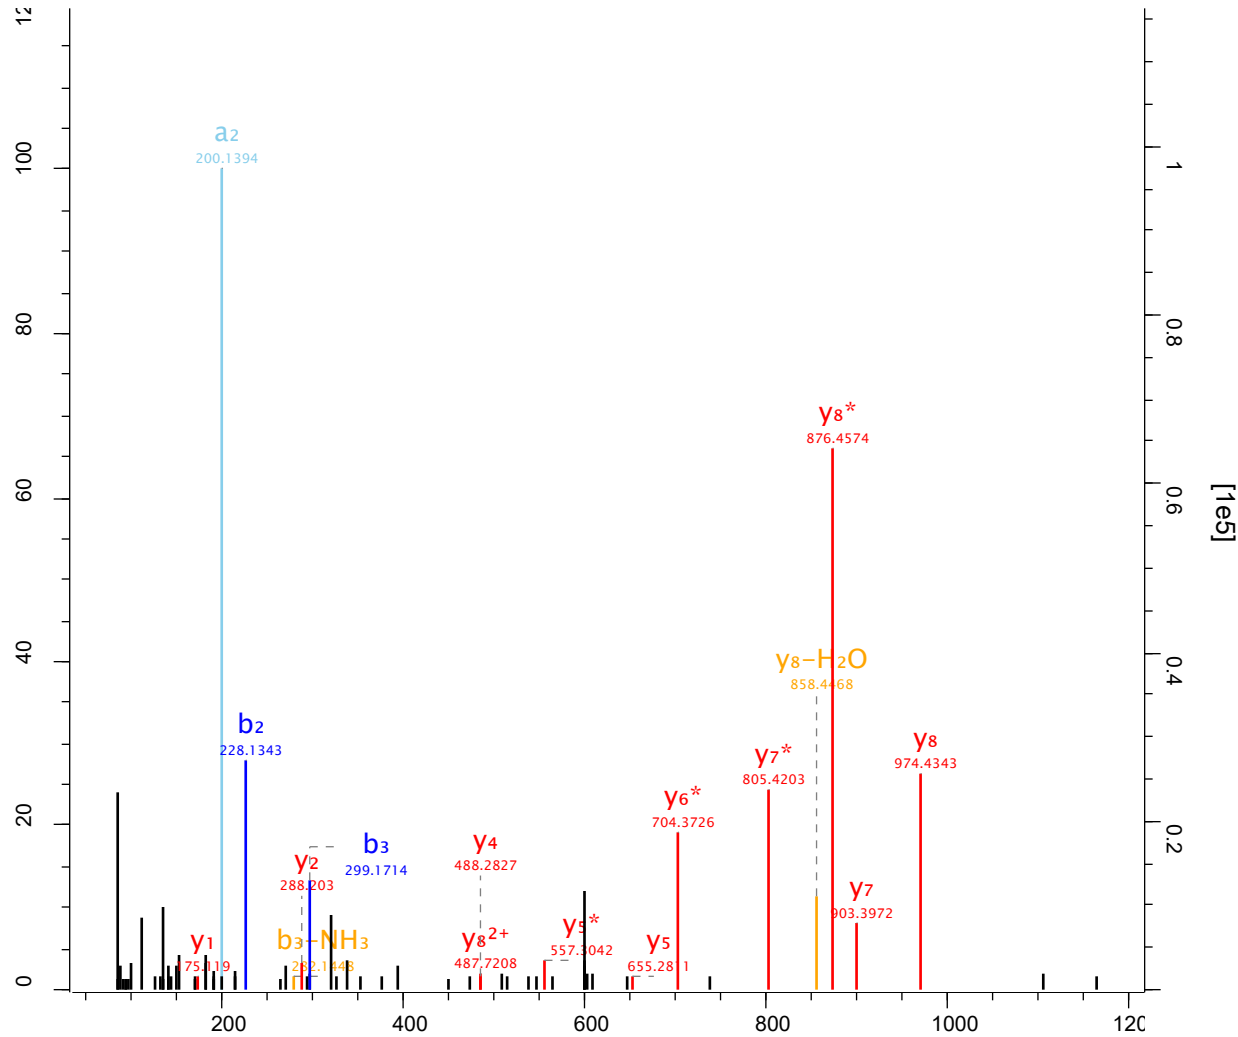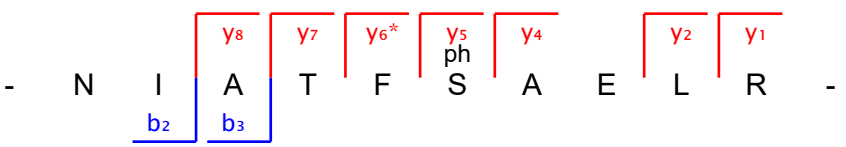

Raw file Scan Method Score m/z  
 sys\_00\_3short 26045 FTMS; HCD 45.22 744.82

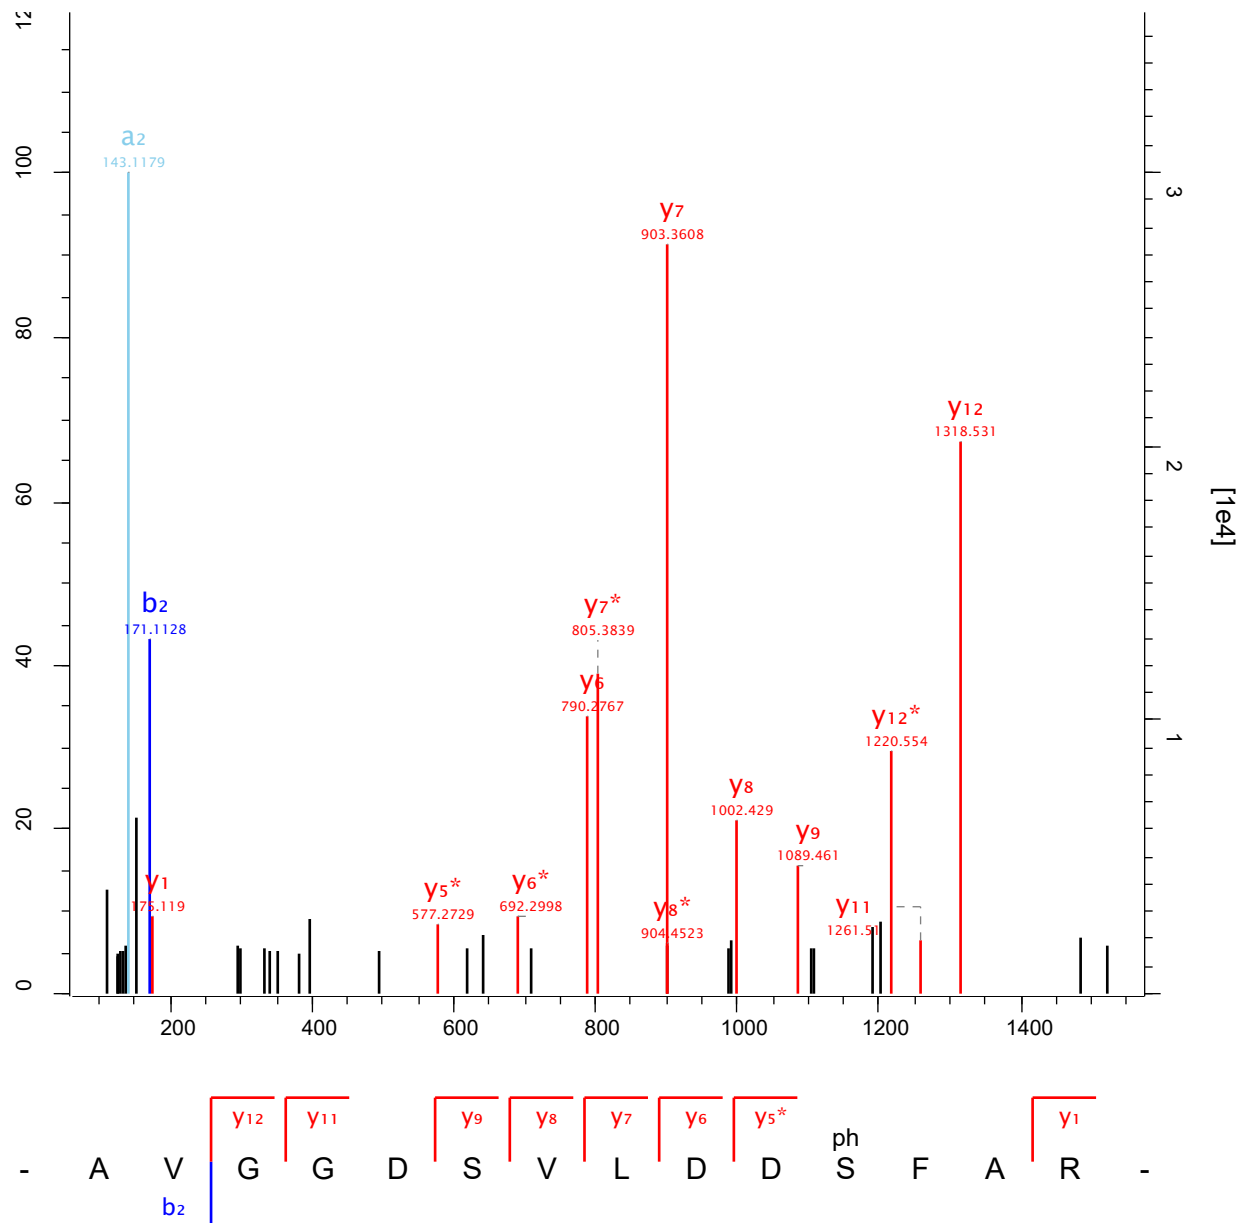

| Raw file      | Scan  | Method    | Score | m/z    |
|---------------|-------|-----------|-------|--------|
| sys_00_3short | 26120 | FTMS; HCD | 69.33 | 776.84 |

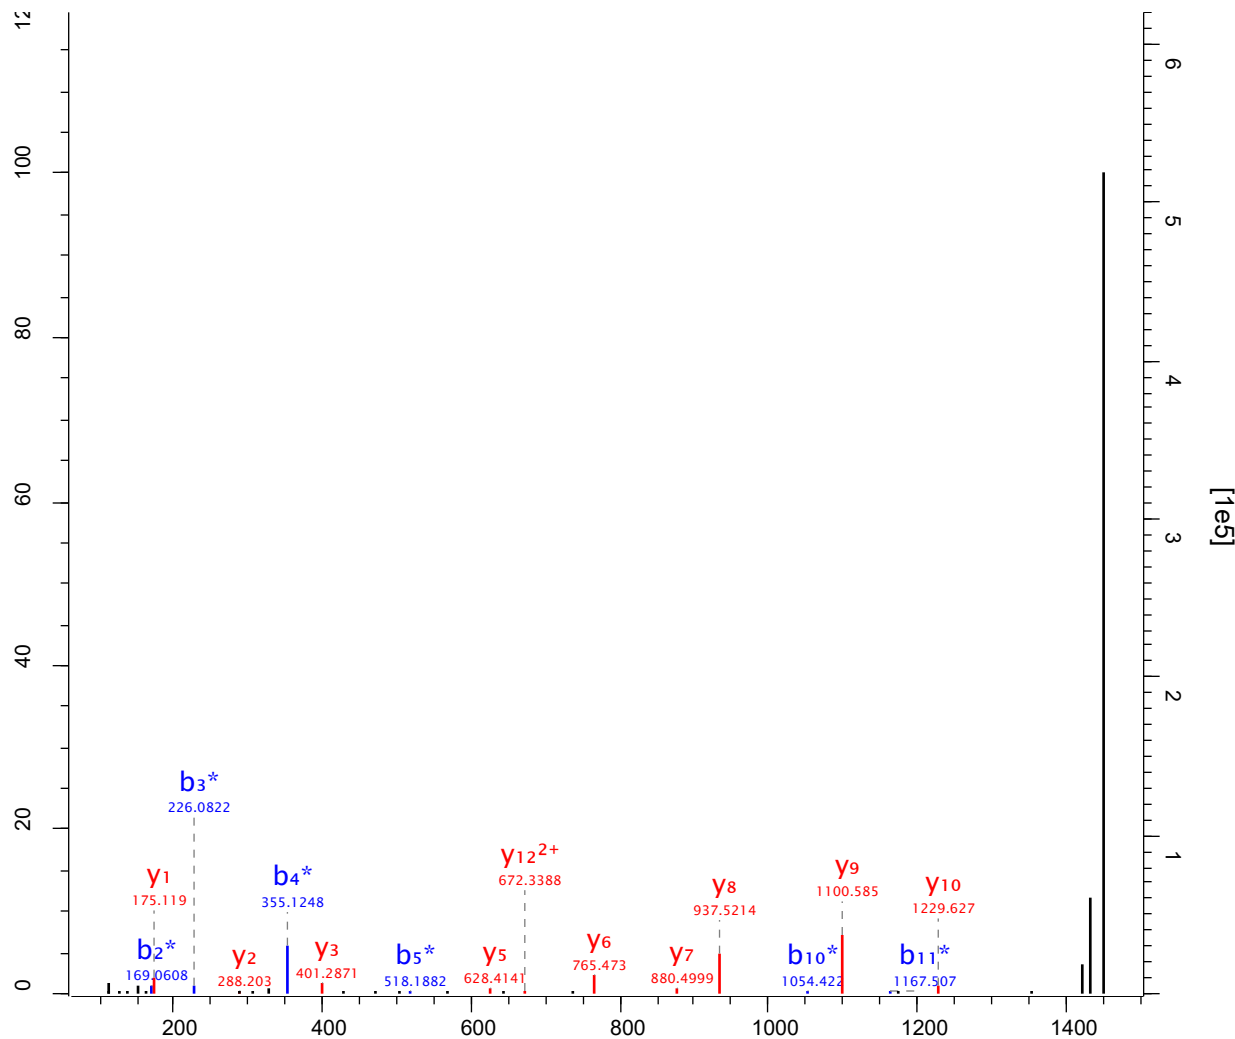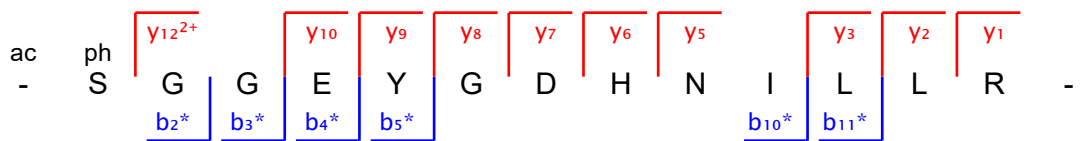

Raw file Scan Method Score m/z  
 sys\_00\_3short 26443 FTMS; HCD 110.12 726.28

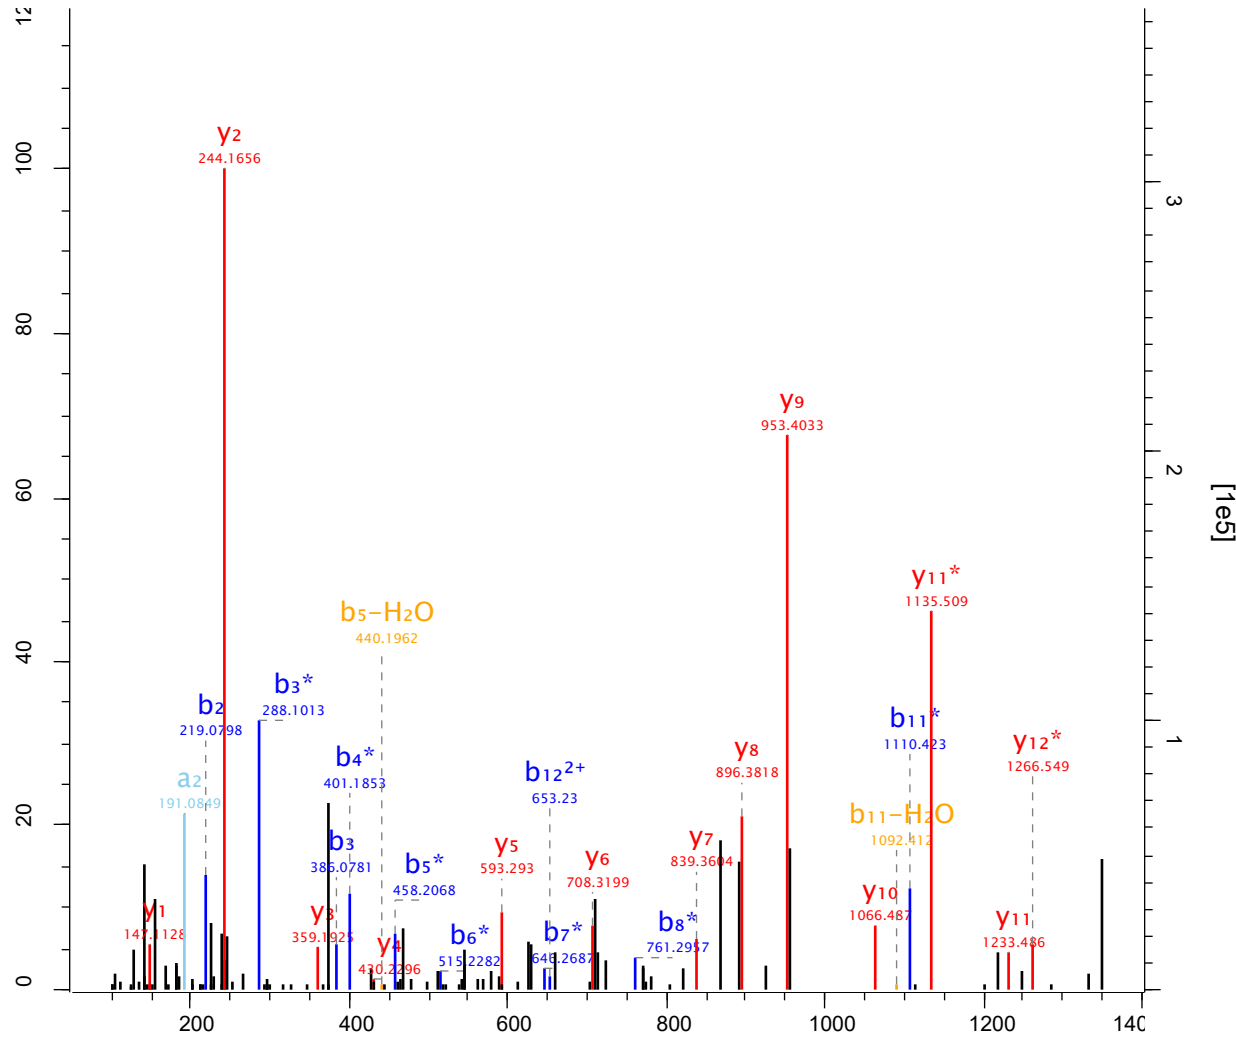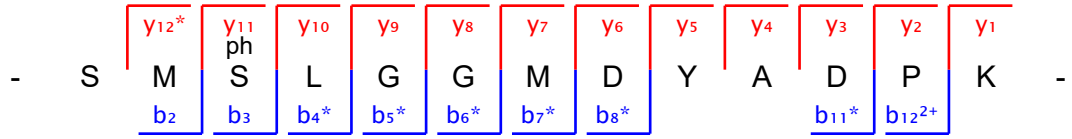

Supplement: 143488_2_supp_334104_ps5hgb.pdf [file 143488_2_supp_334104_ps5hgb.pdf]
