# Supplementary material for: The Systemin Signaling Cascade As Derived from Time Course Analyses of the Systemin-responsive Phosphoproteome
Source: PubMed Central journal article supplement (PMC6683004; doi:10.1074/mcp.ra119.001367), 2019-05-28

**Supplementary Figure 2:** Representative annotated spectra of identified phosphopeptides under systemin,A17 and water treatment as exported from MaxQuant.

Raw file Scan Method Score m/z  
 sys\_00\_3short 26476 FTMS; HCD 108.63 895.82

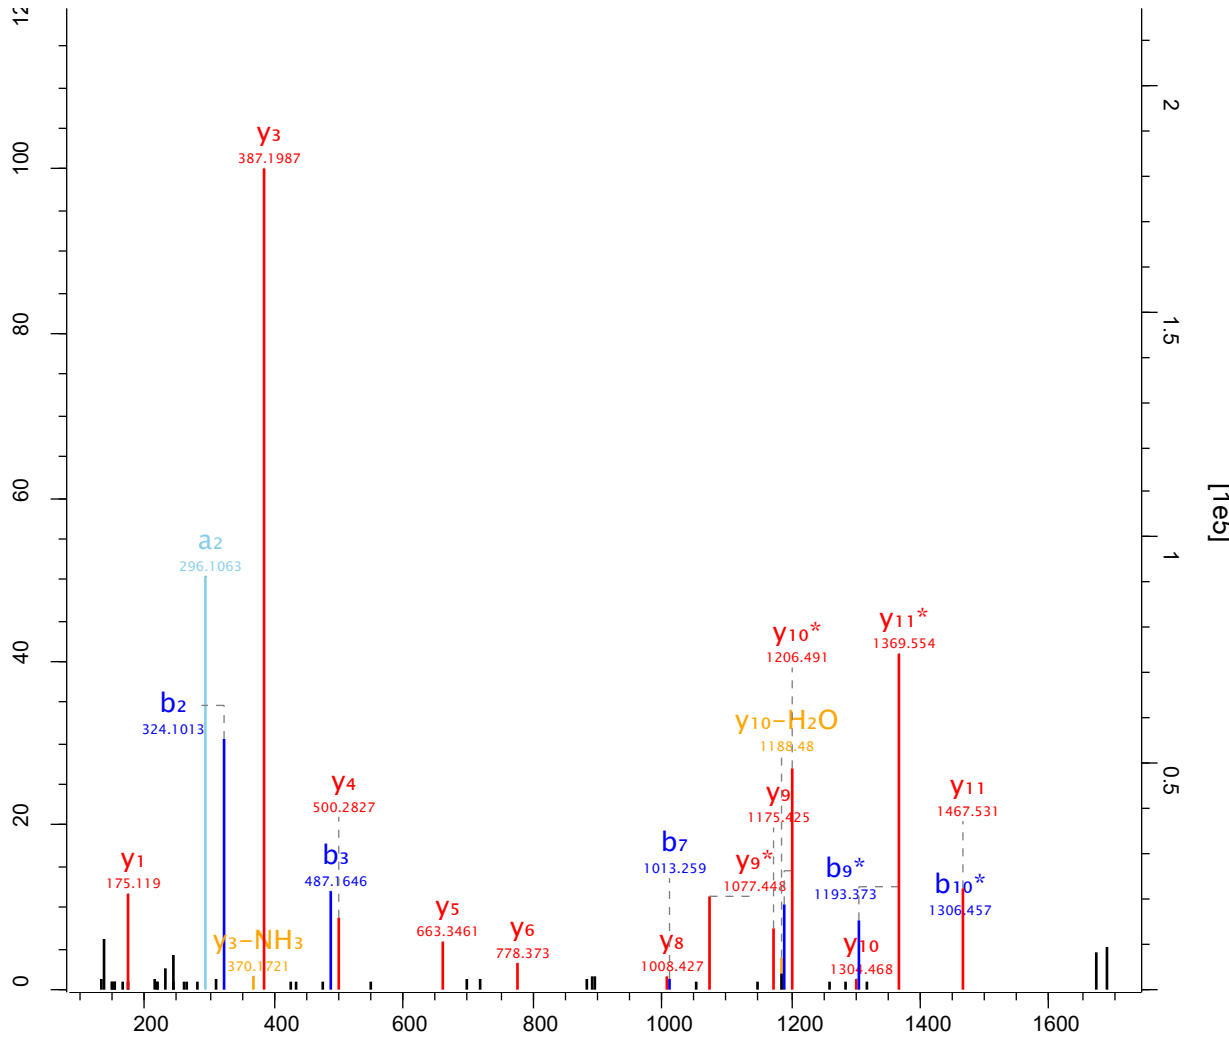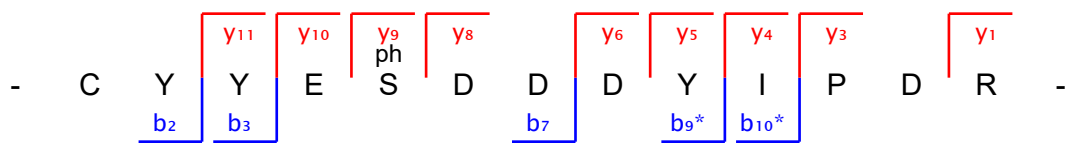

Raw file Scan Method Score m/z  
 sys\_00\_3short 26954 FTMS; HCD 168.84 833.41

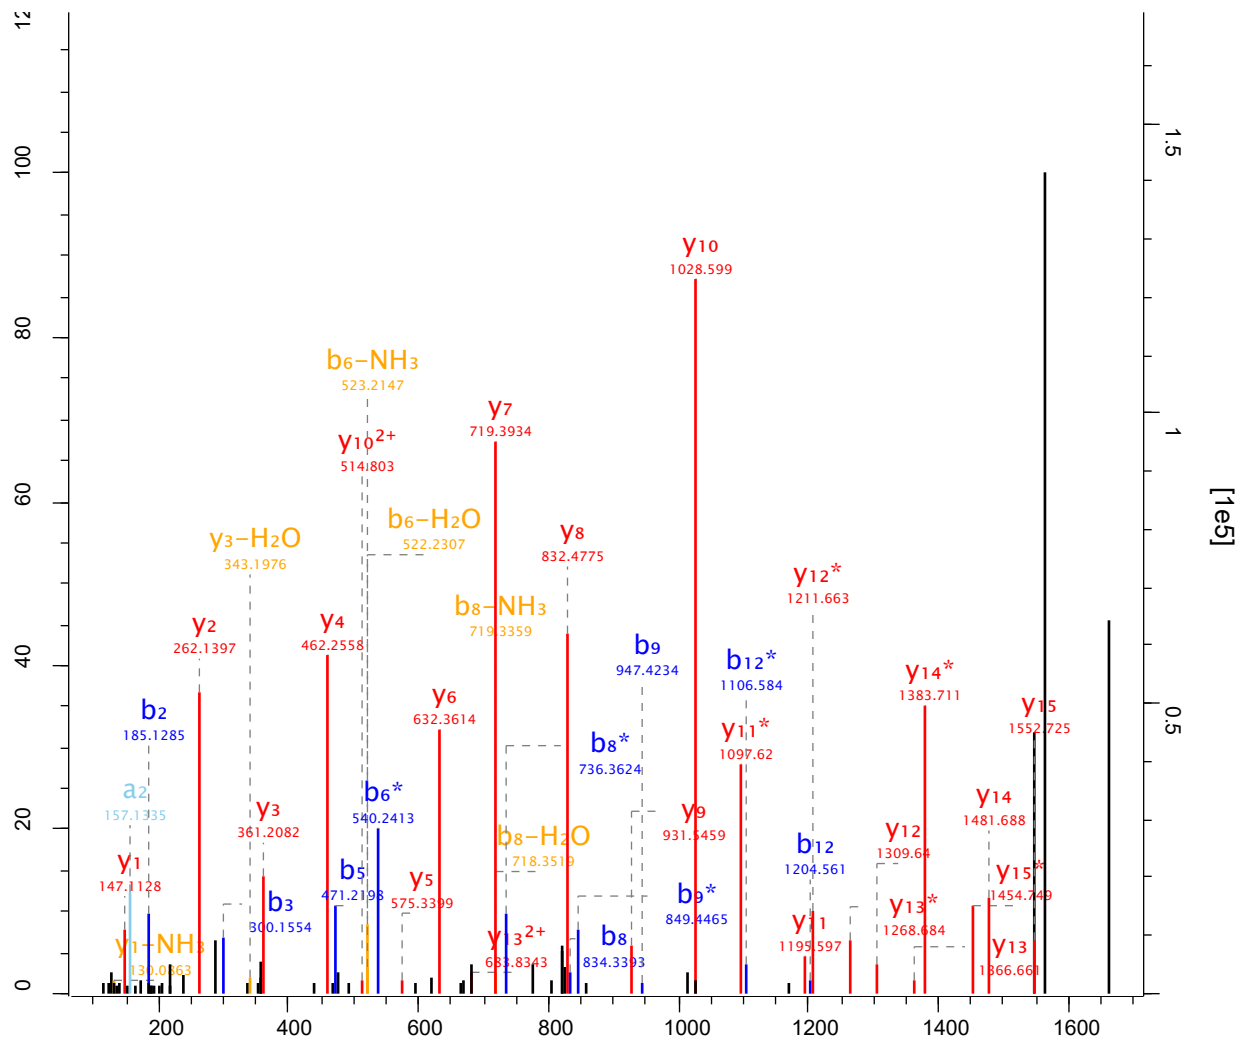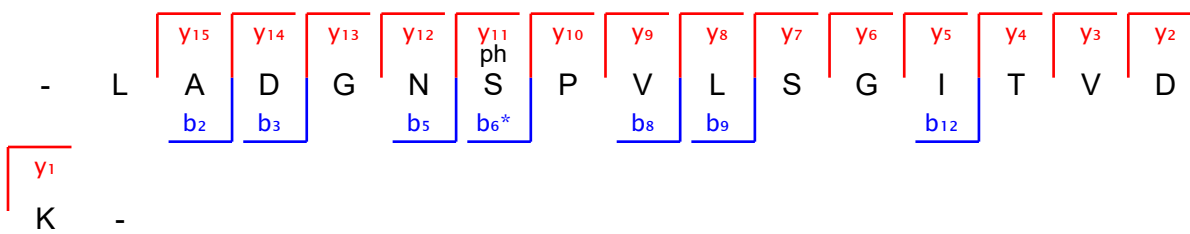

Raw file Scan Method Score m/z  
 sys\_00\_3short 27519 FTMS; HCD 64.52 621.29

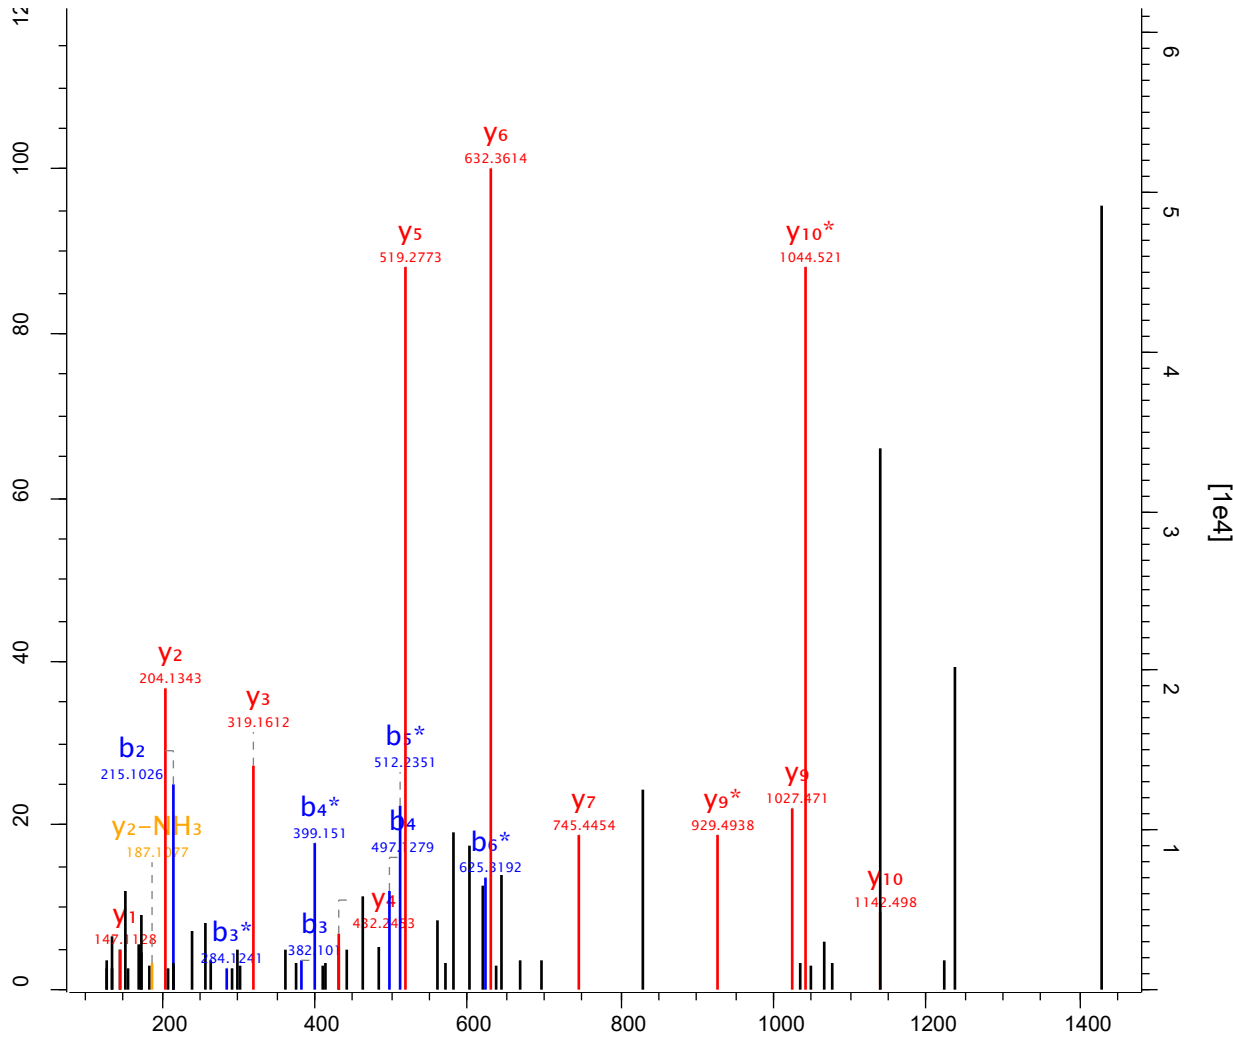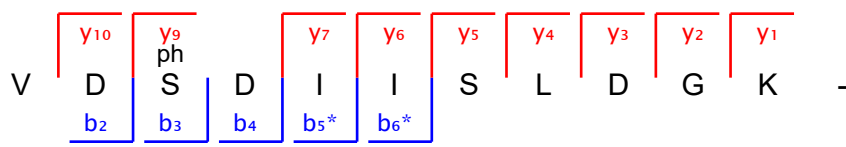



| Raw file      | Scan  | Method    | Score | m/z    |
|---------------|-------|-----------|-------|--------|
| sys_00_3short | 27536 | FTMS; HCD | 62.09 | 618.78 |

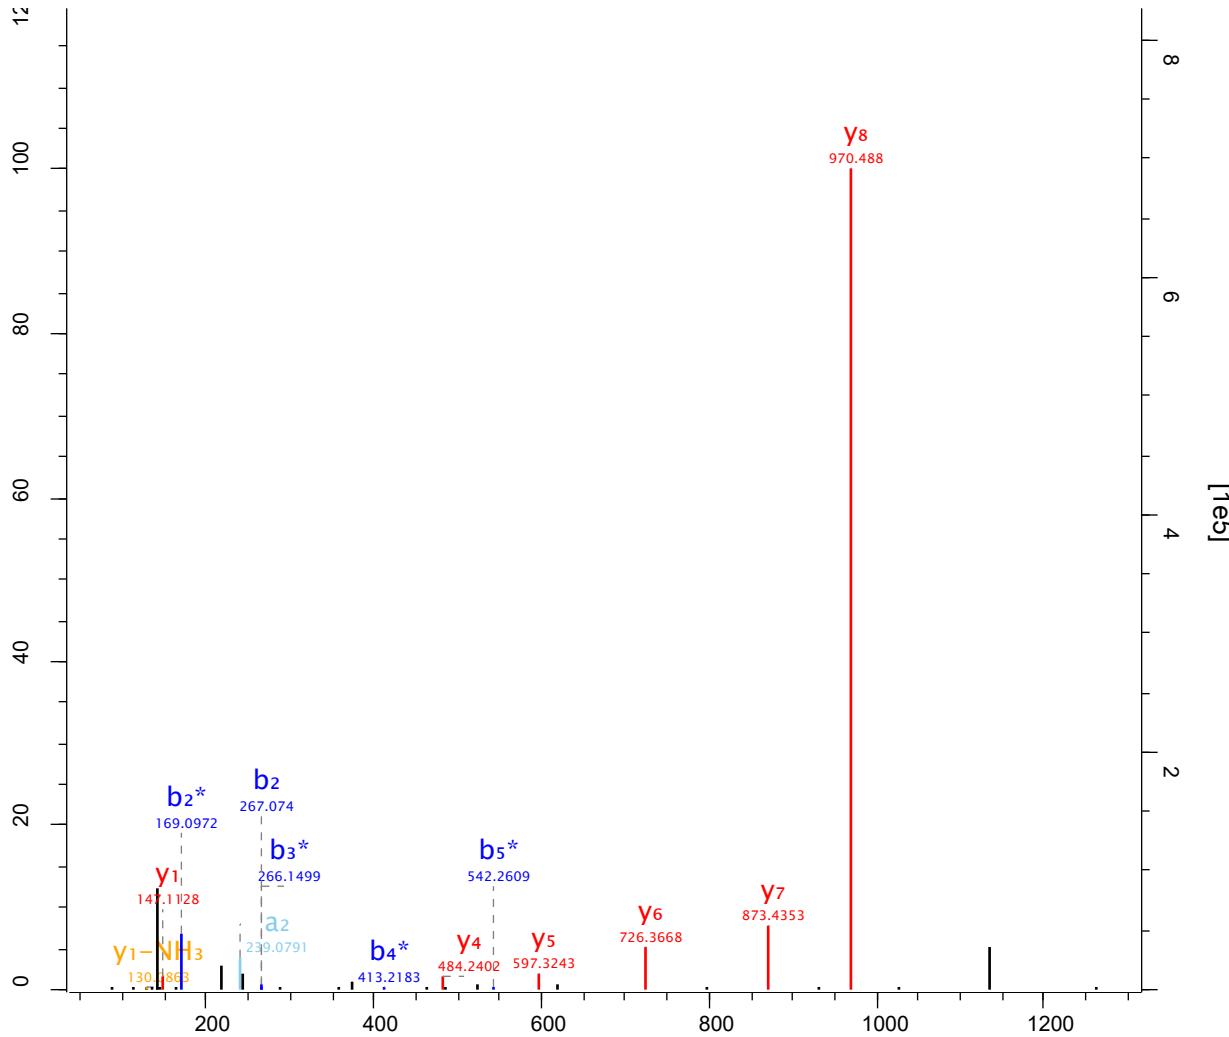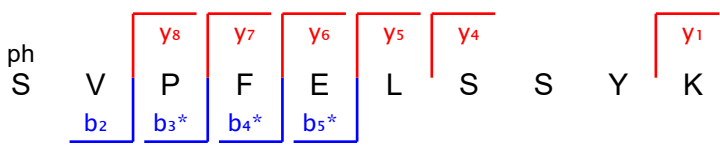

Raw file Scan Method Score m/z  
 sys\_00\_3short 2774 FTMS; HCD 143.7 398.2

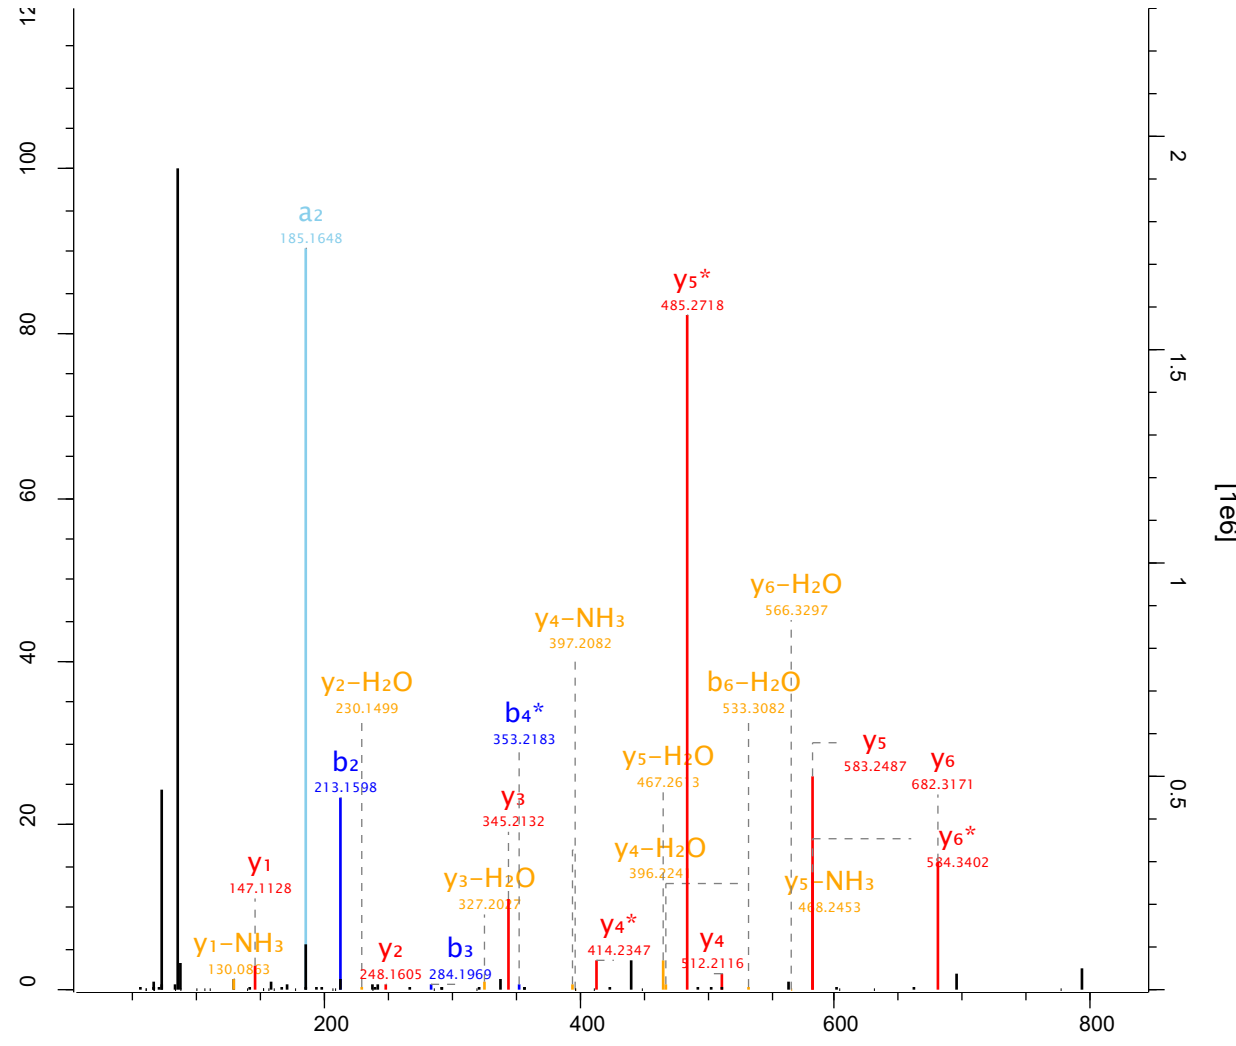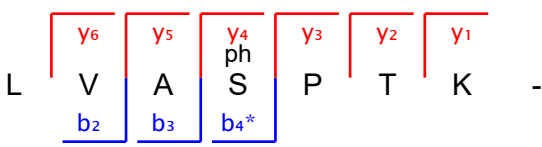

Raw file Scan Method Score m/z  
 sys\_00\_3short 27750 FTMS; HCD 49.12 739.68

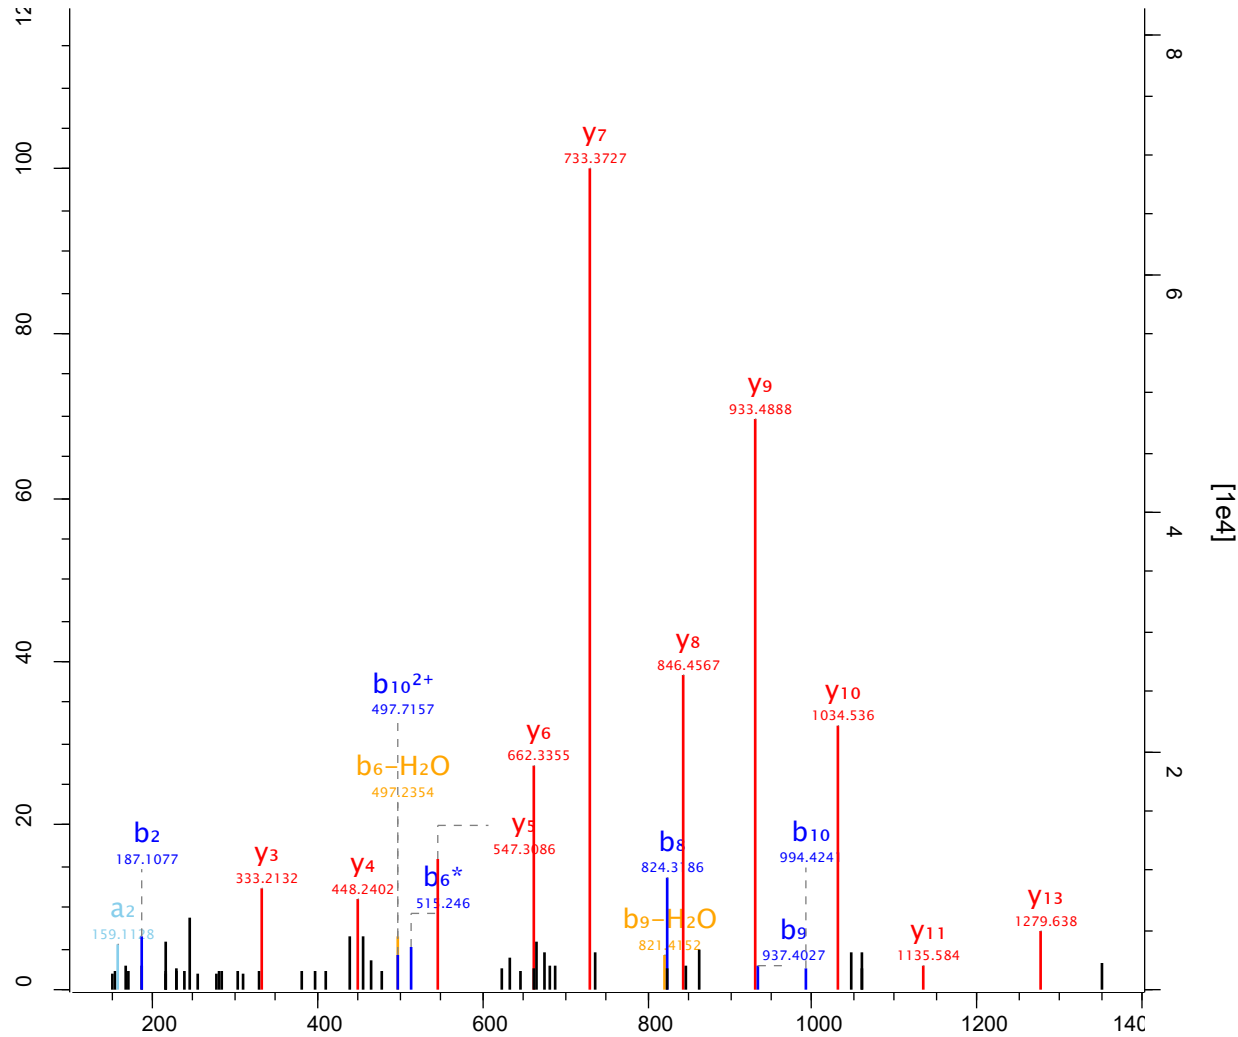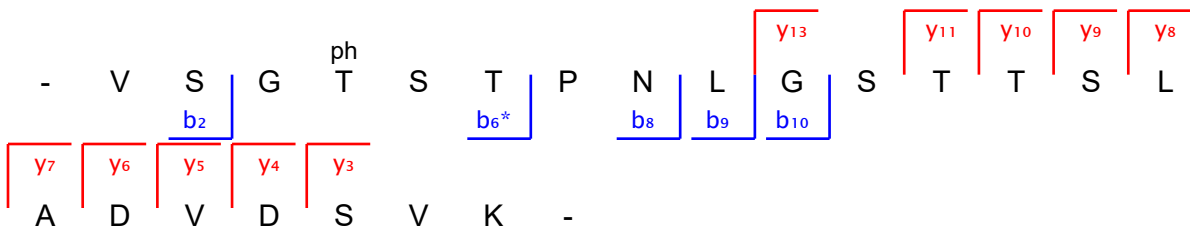

| Raw file      | Scan  | Method    | Score | m/z    |
|---------------|-------|-----------|-------|--------|
| sys_00_3short | 28318 | FTMS; HCD | 72.2  | 527.25 |

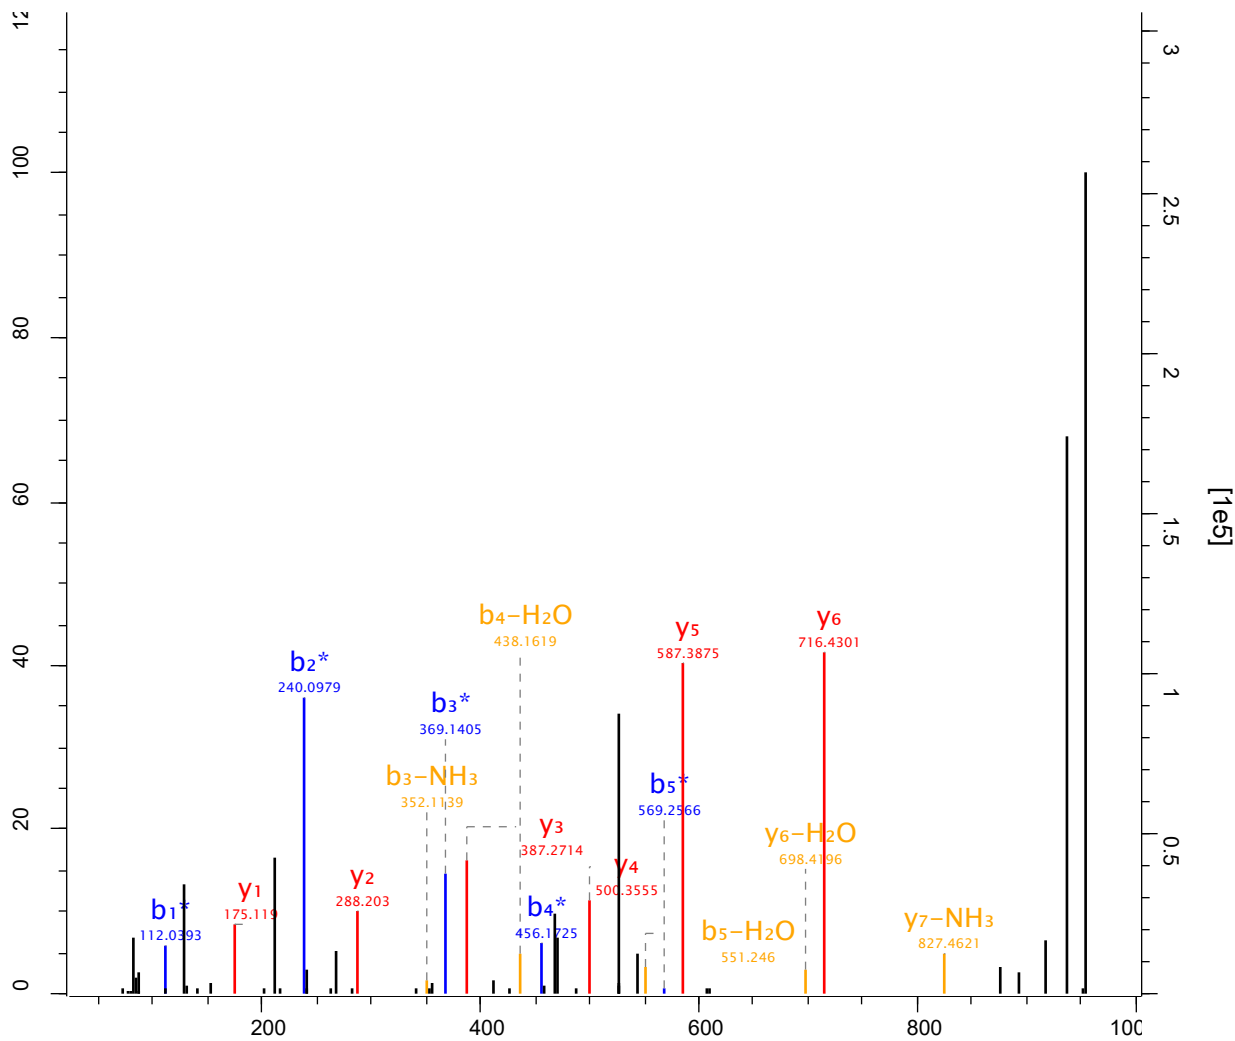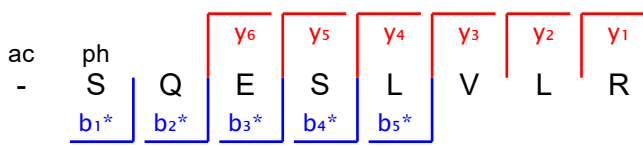

Raw file Scan Method Score m/z  
 sys\_00\_3short 28403 FTMS; HCD 45.58 1151.47

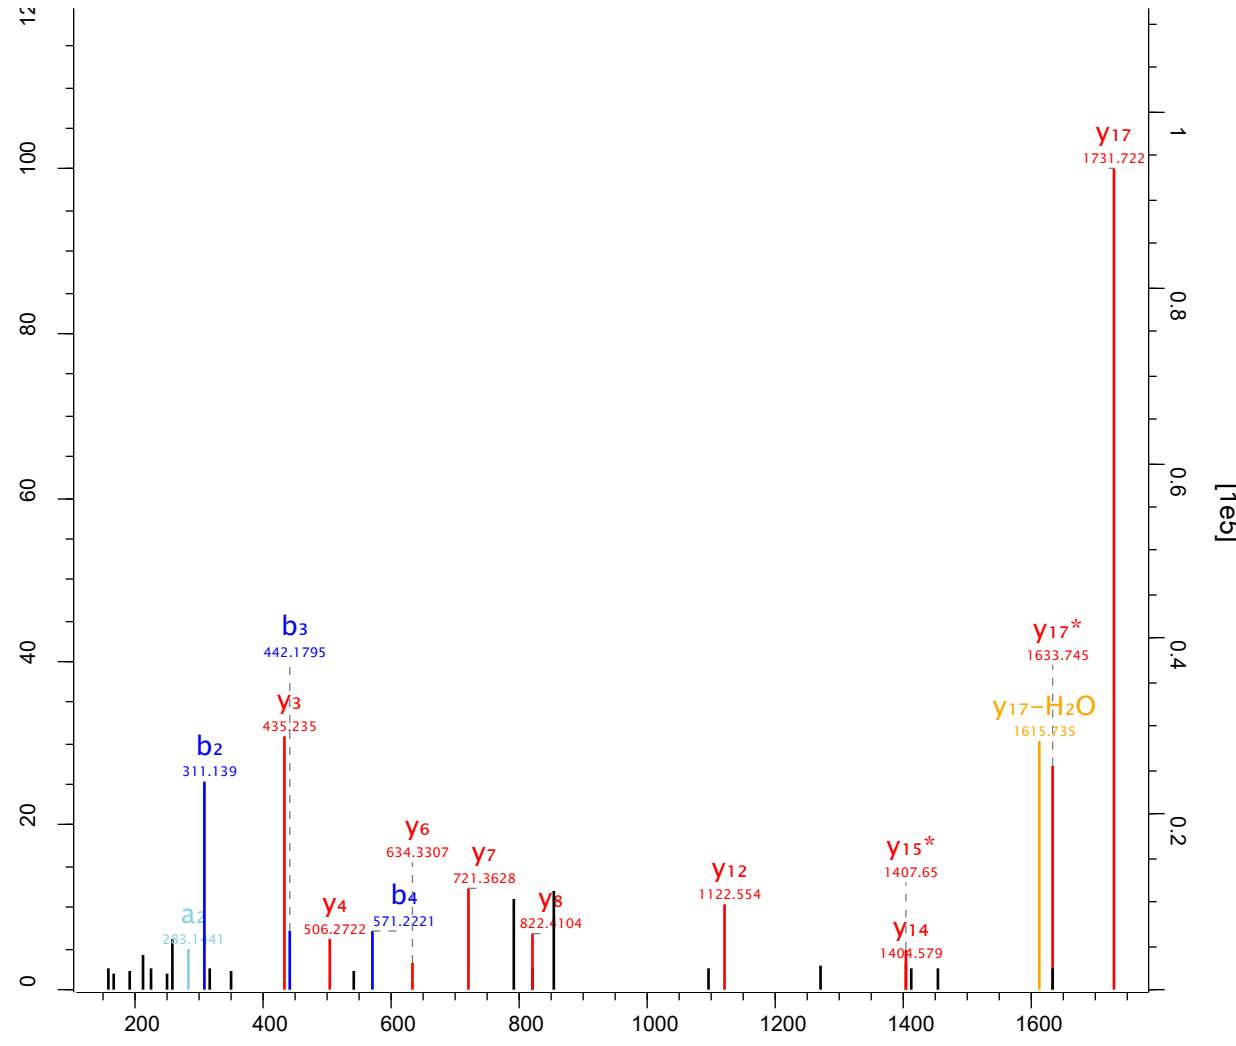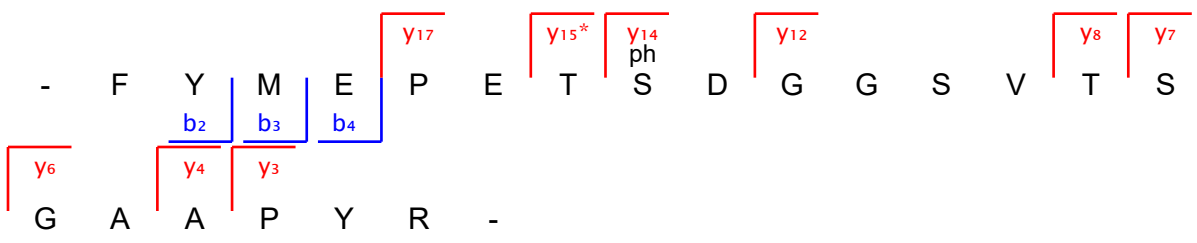

Raw file Scan Method Score m/z  
 sys\_00\_3short 28802 FTMS; HCD 136.6 649.8

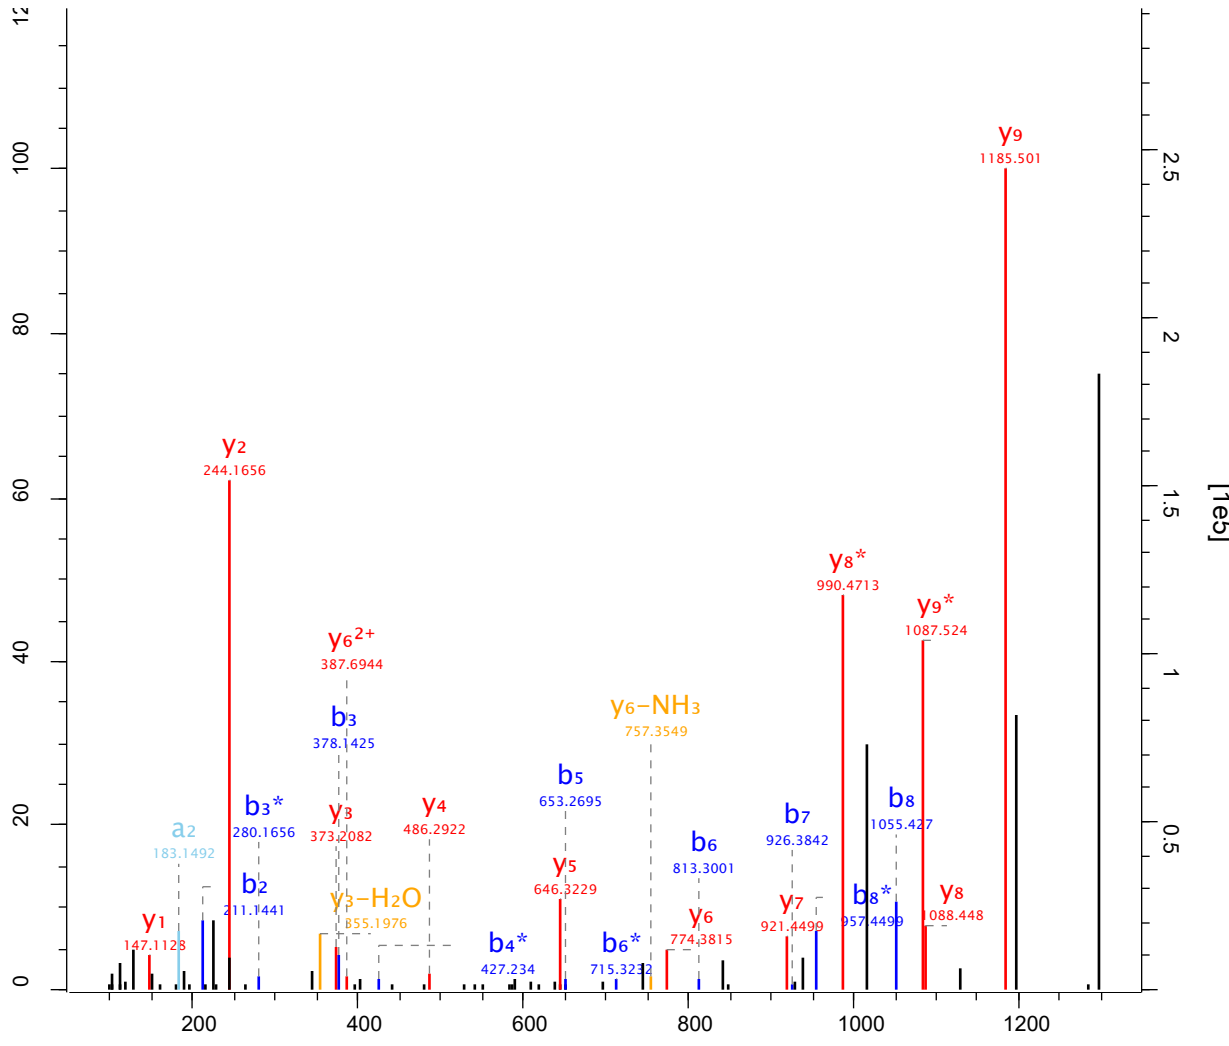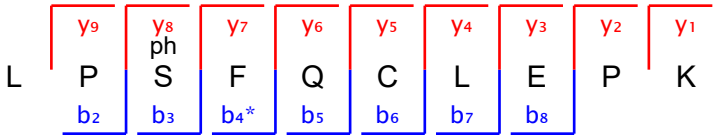

Raw file Scan Method Score m/z  
 sys\_00\_3short 29095 FTMS; HCD 186.94 736.3

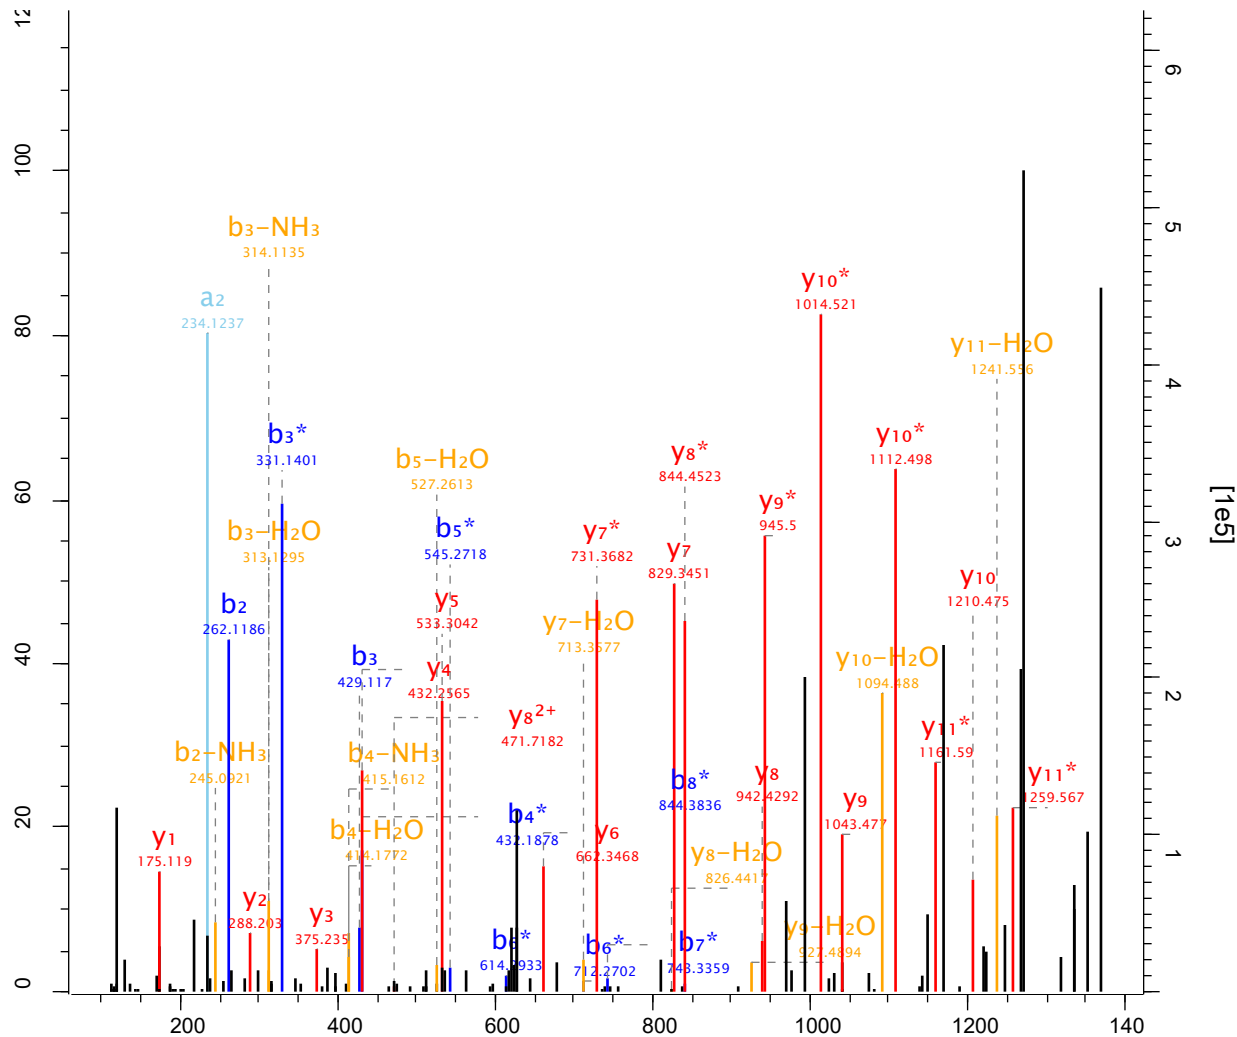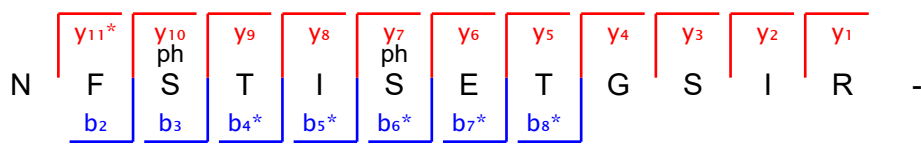

Raw file Scan Method Score m/z  
 sys\_00\_3short 29176 FTMS; HCD 143.28 750.87

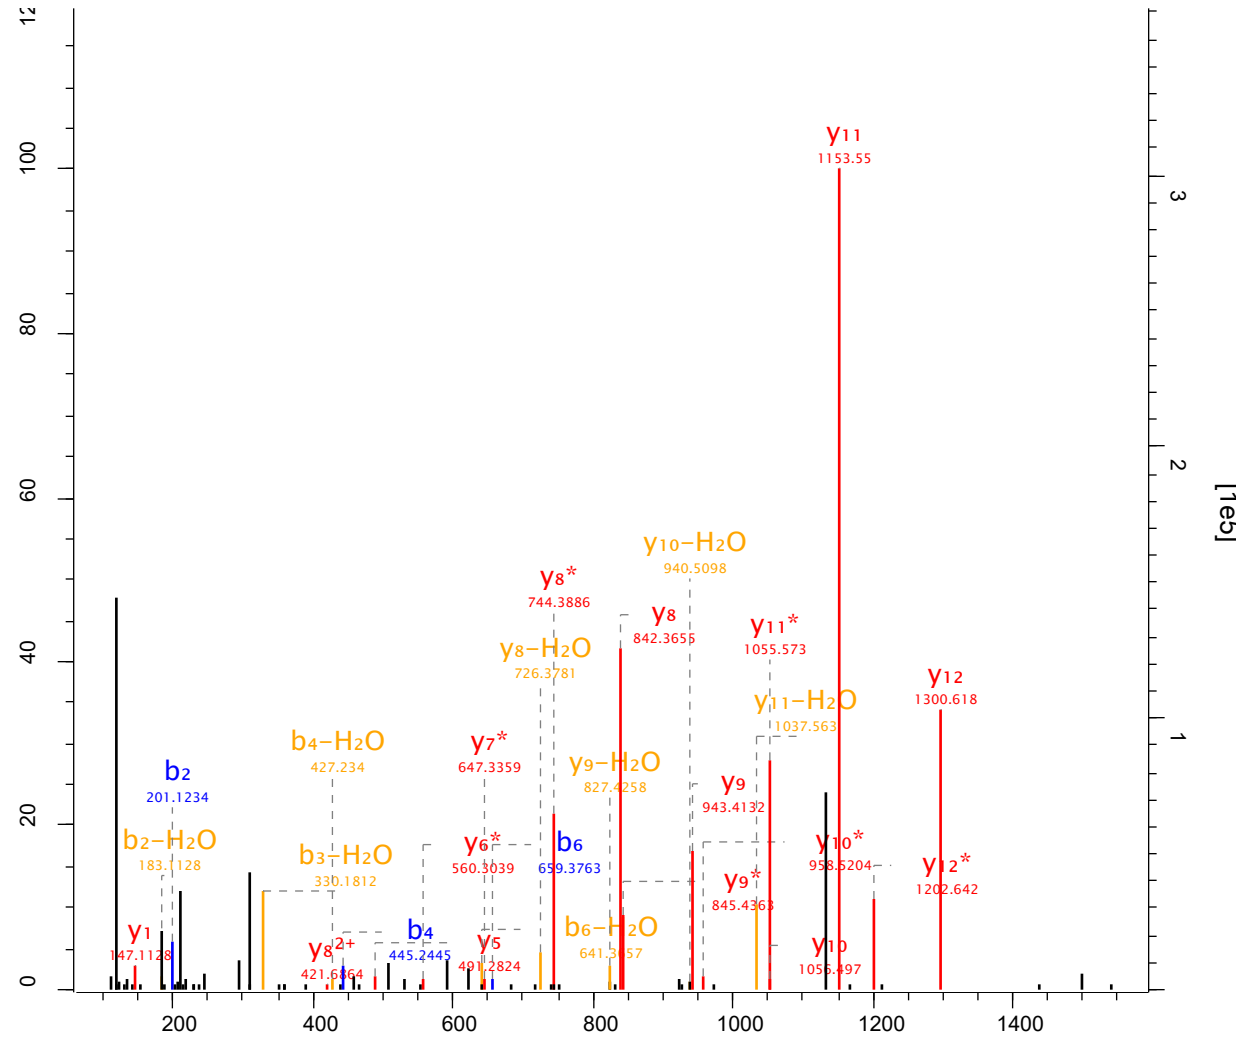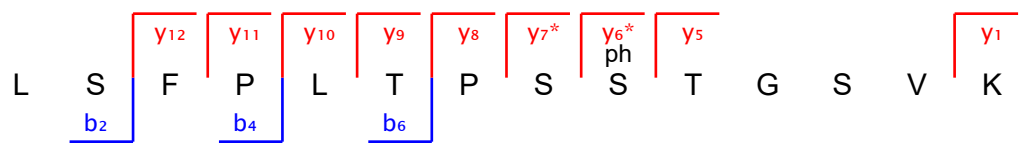



Raw file Scan Method Score m/z  
 sys\_00\_3short 2951 FTMS; HCD 119.39 522.22

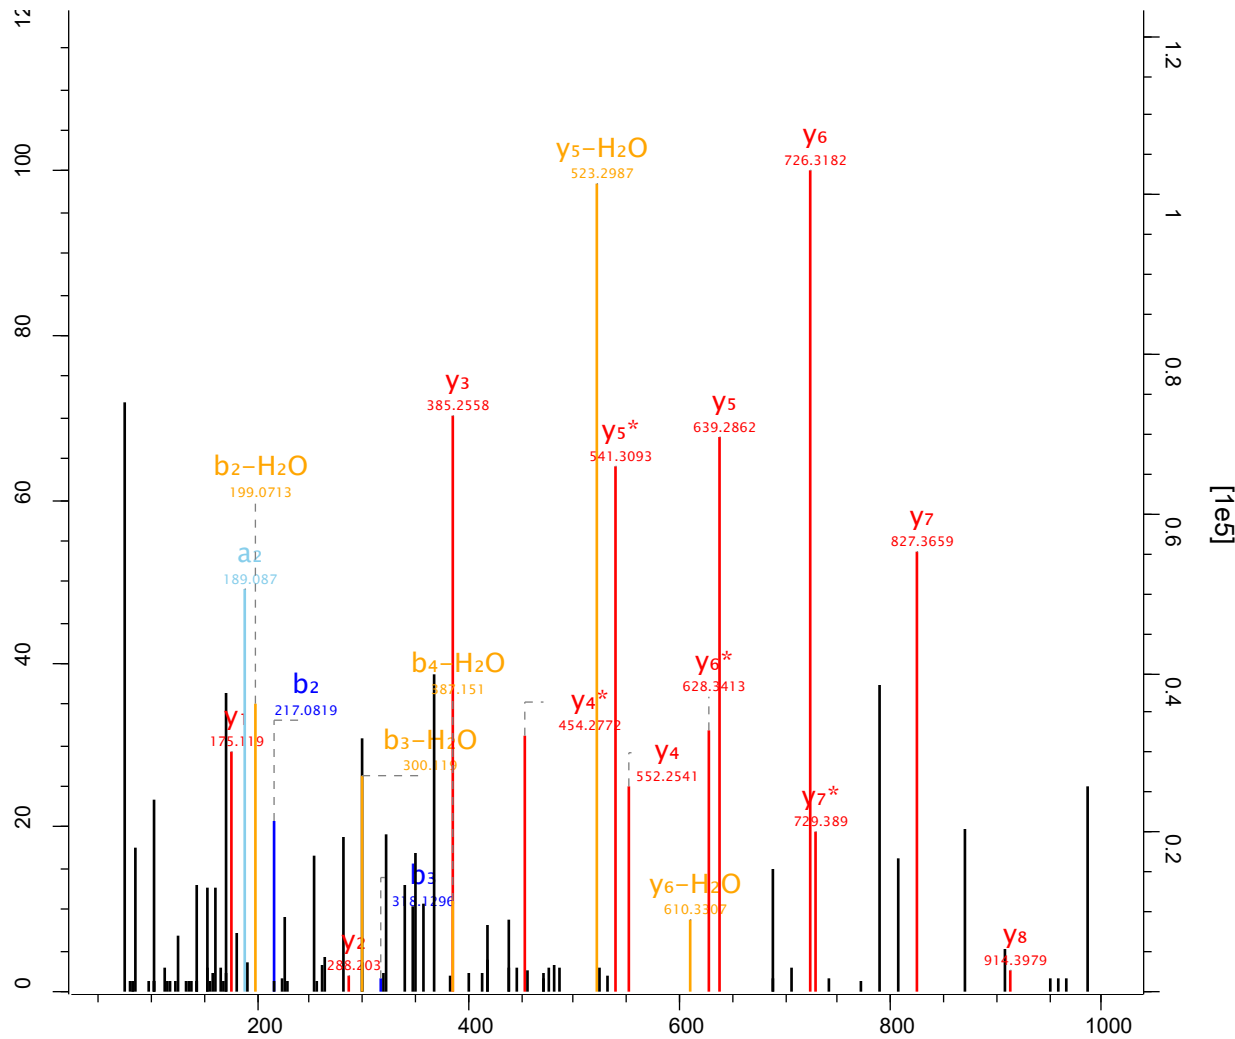

- E S T S S ph S P L R -  
 b<sub>2</sub> b<sub>3</sub>

Raw file Scan Method Score m/z  
 sys\_00\_3short 29759 FTMS; HCD 68.48 692.33

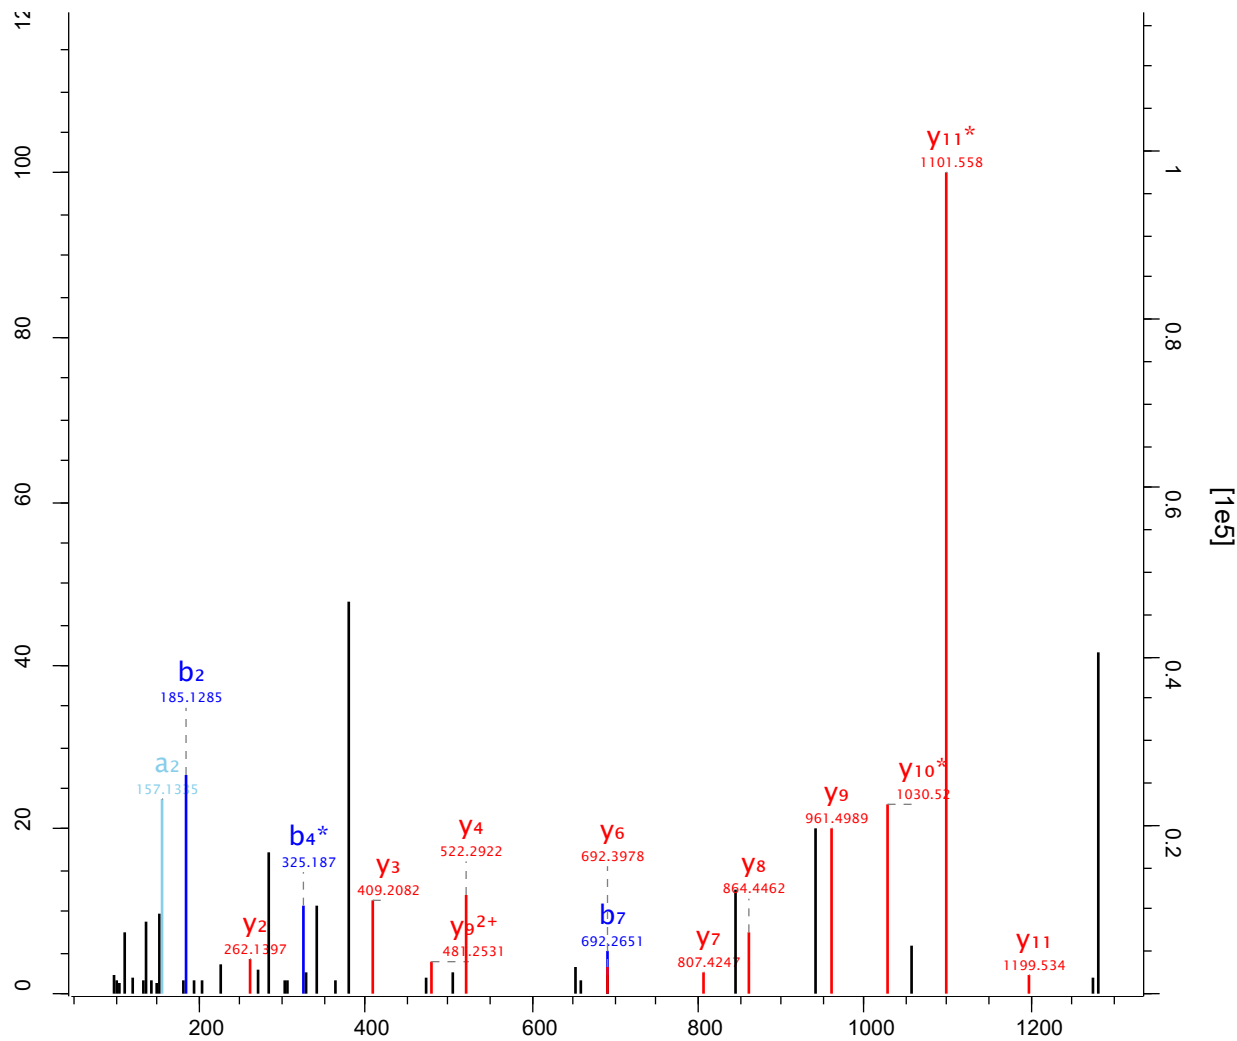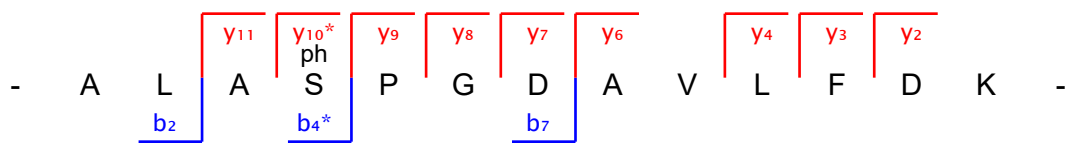

Raw file Scan Method Score m/z  
 sys\_00\_3short 29829 FTMS; HCD 62.2 760.83

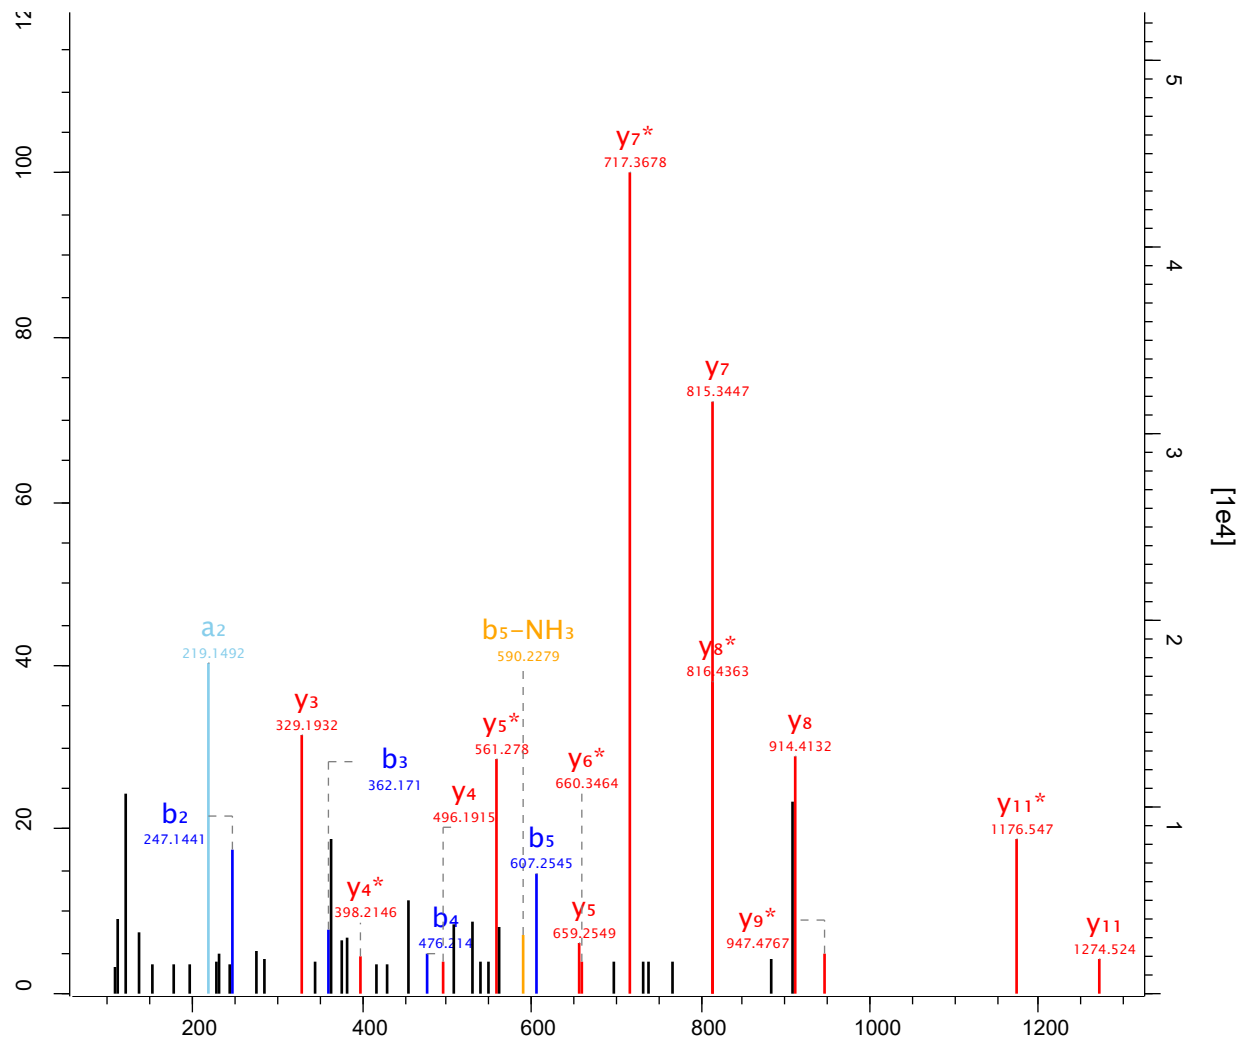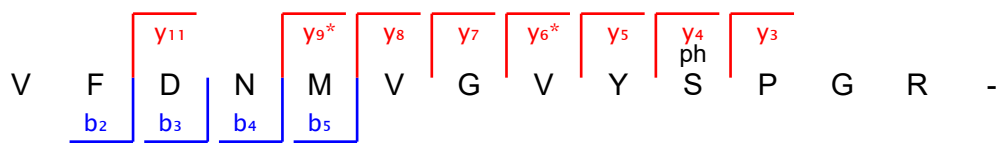

Raw file Scan Method Score m/z  
 sys\_00\_3short 29941 FTMS; HCD 113.38 573.73

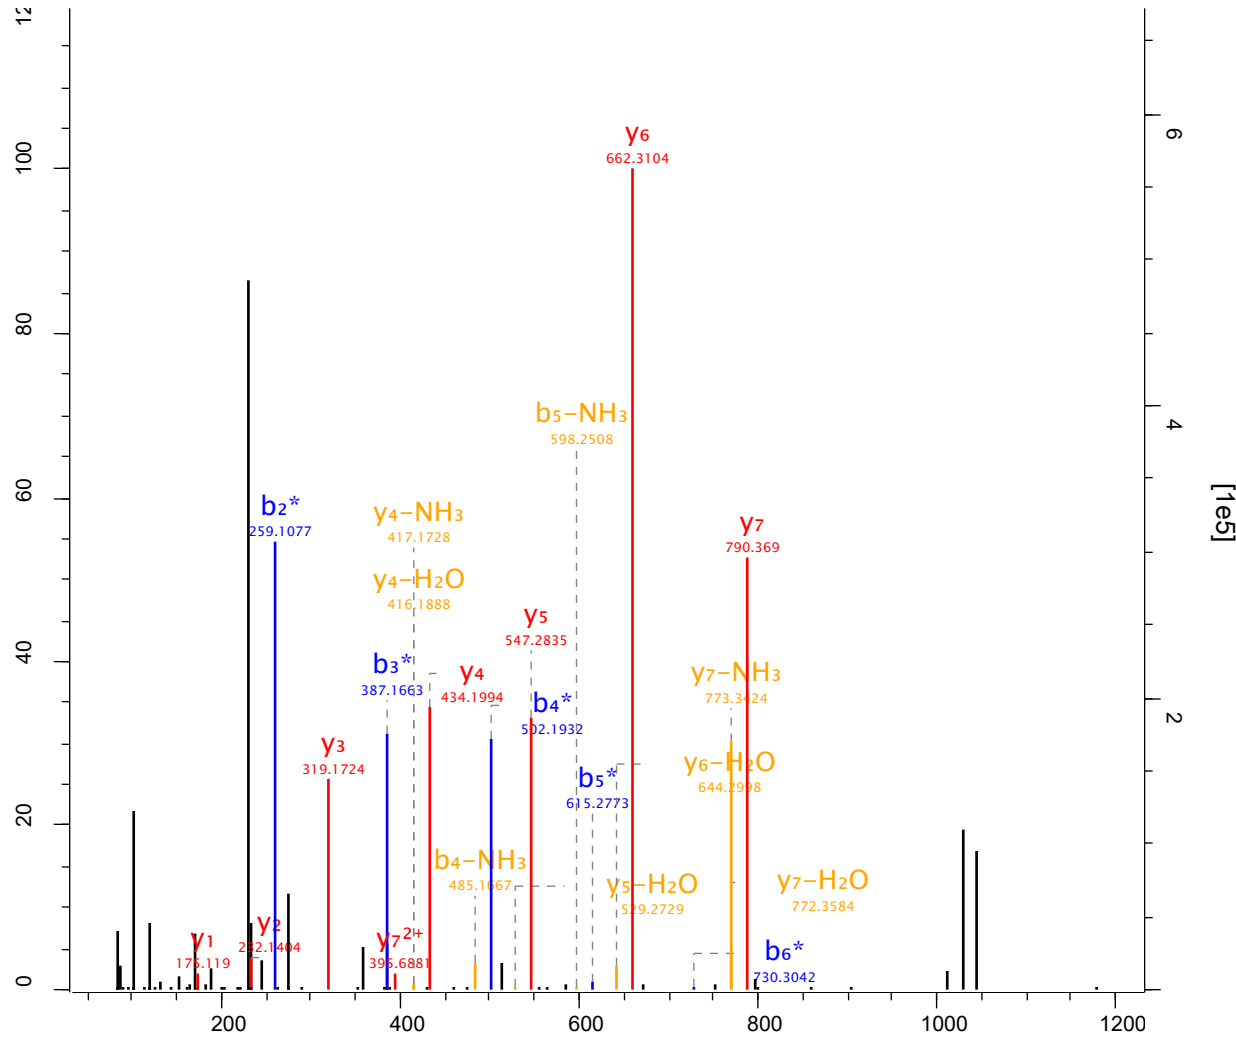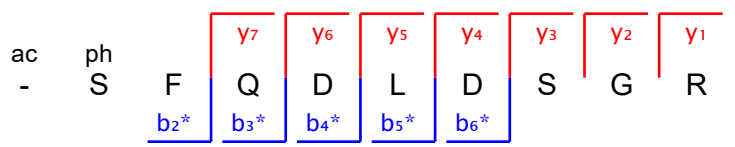

Raw file Scan Method Score m/z  
 sys\_00\_3short 30029 FTMS; HCD 80.31 590.81

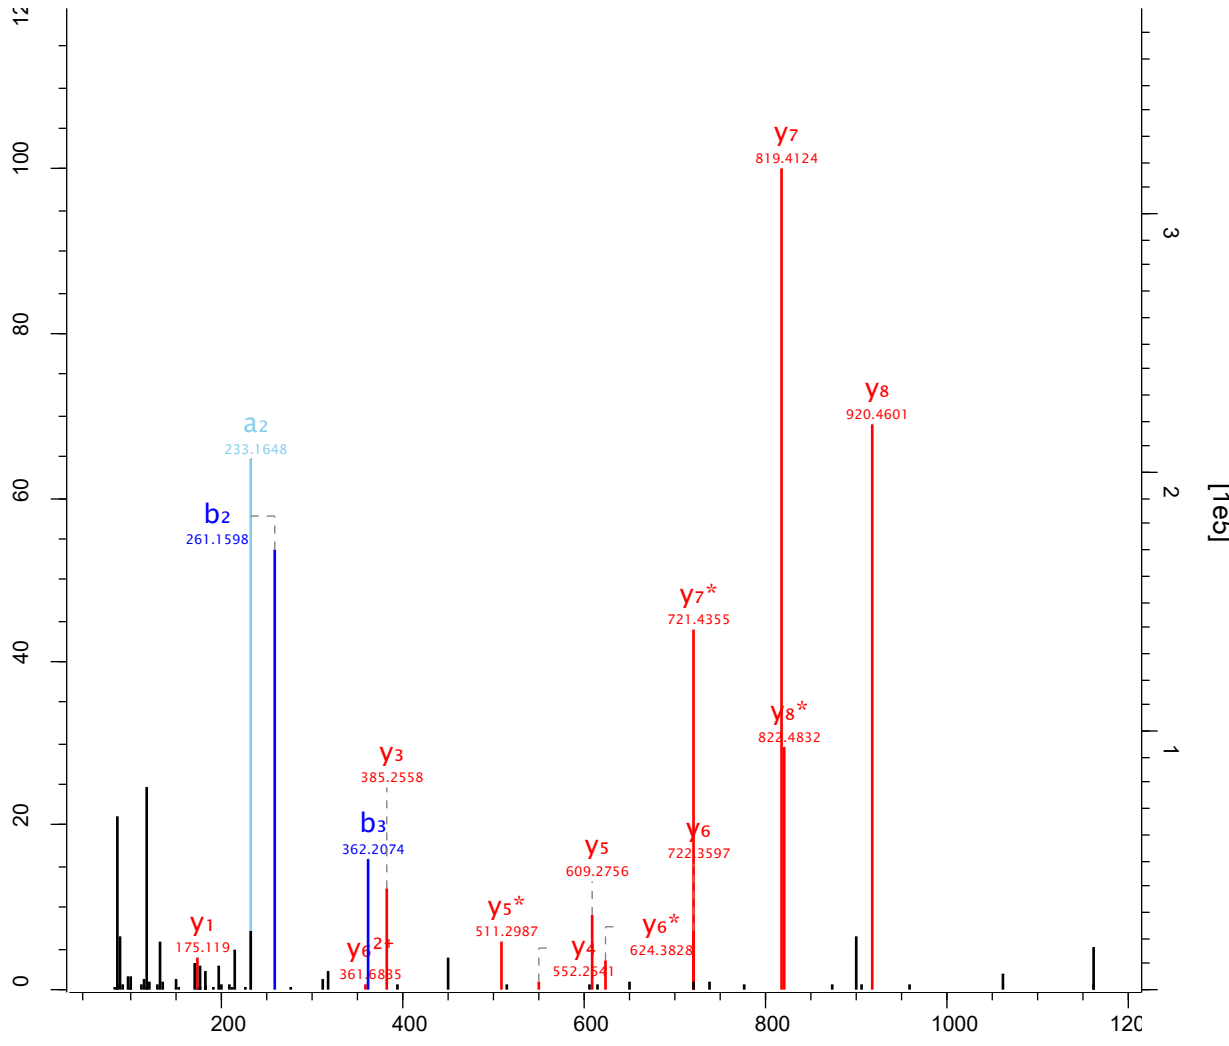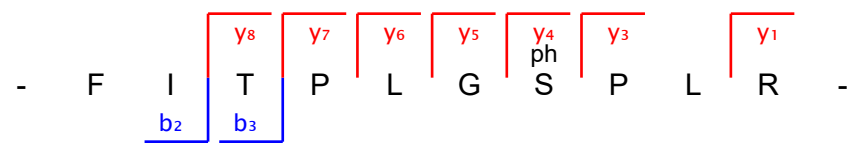

Raw file Scan Method Score m/z  
 sys\_00\_3short 30170 FTMS; HCD 141.55 707.3

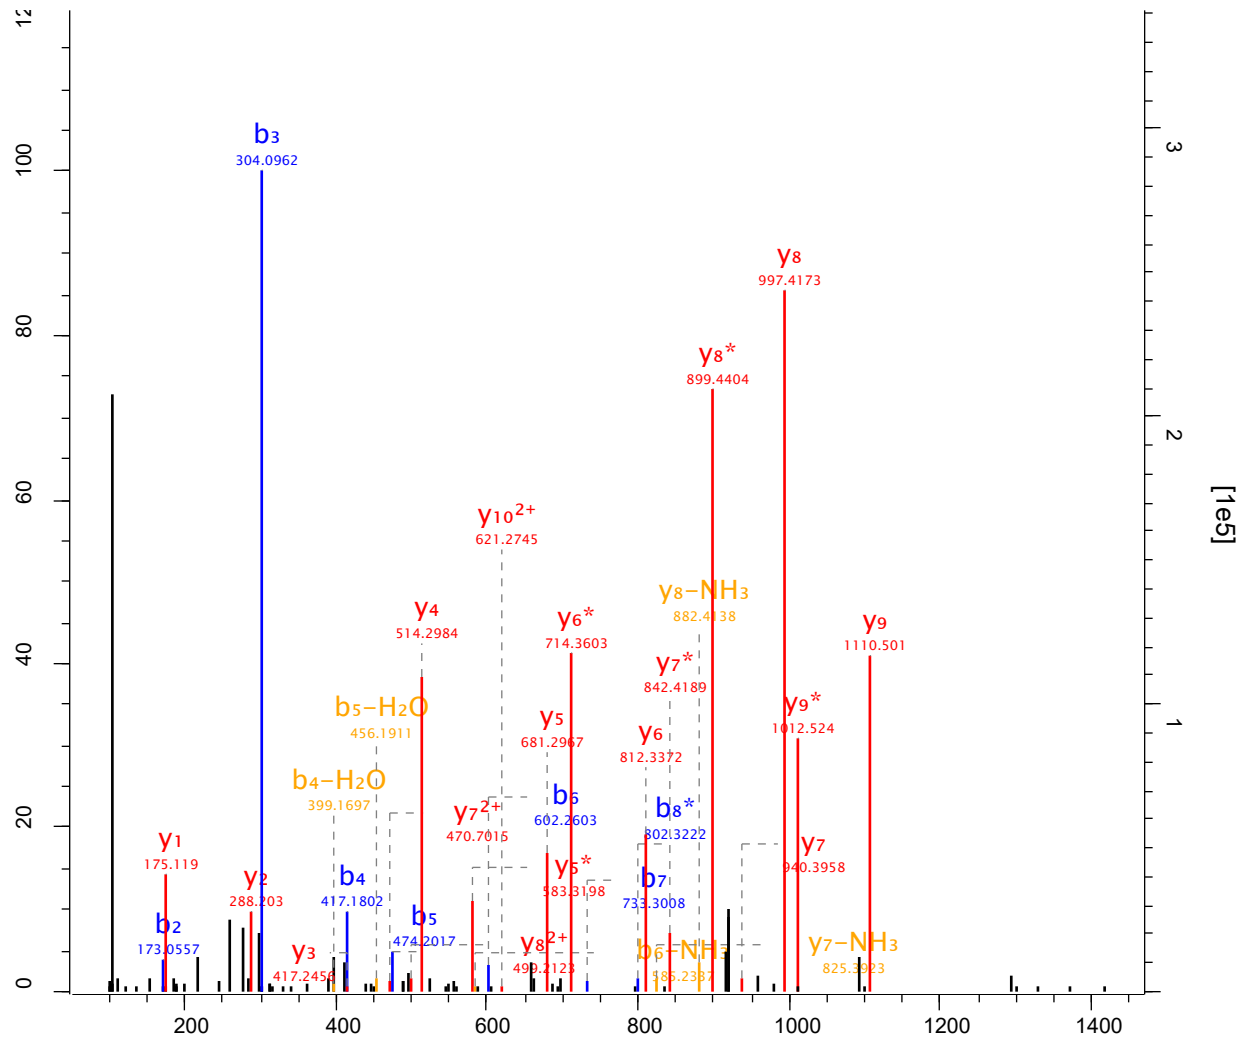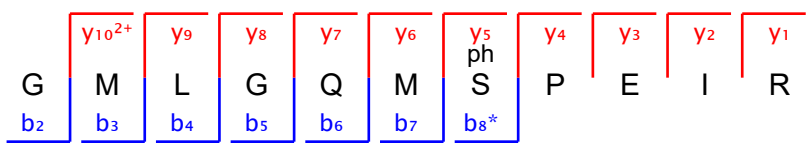

Raw file Scan Method Score m/z  
 sys\_00\_3short 30458 FTMS; HCD 48.05 842.89

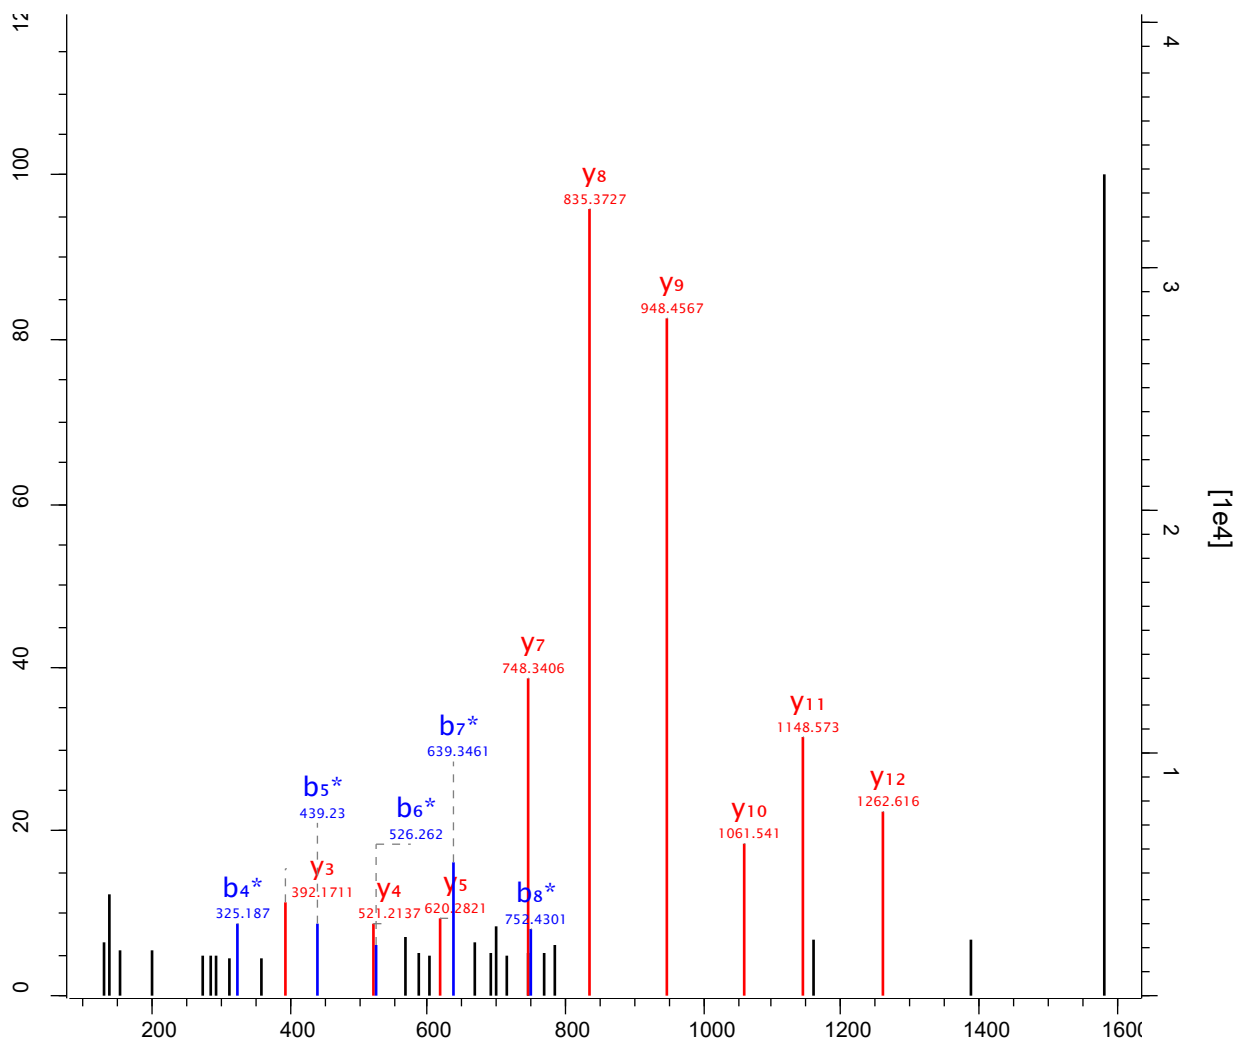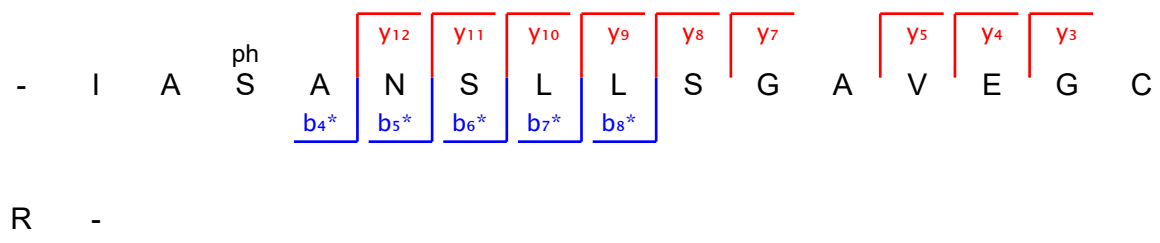

R -

Raw file Scan Method Score m/z  
 sys\_00\_3short 30506 FTMS; HCD 96.14 865.36

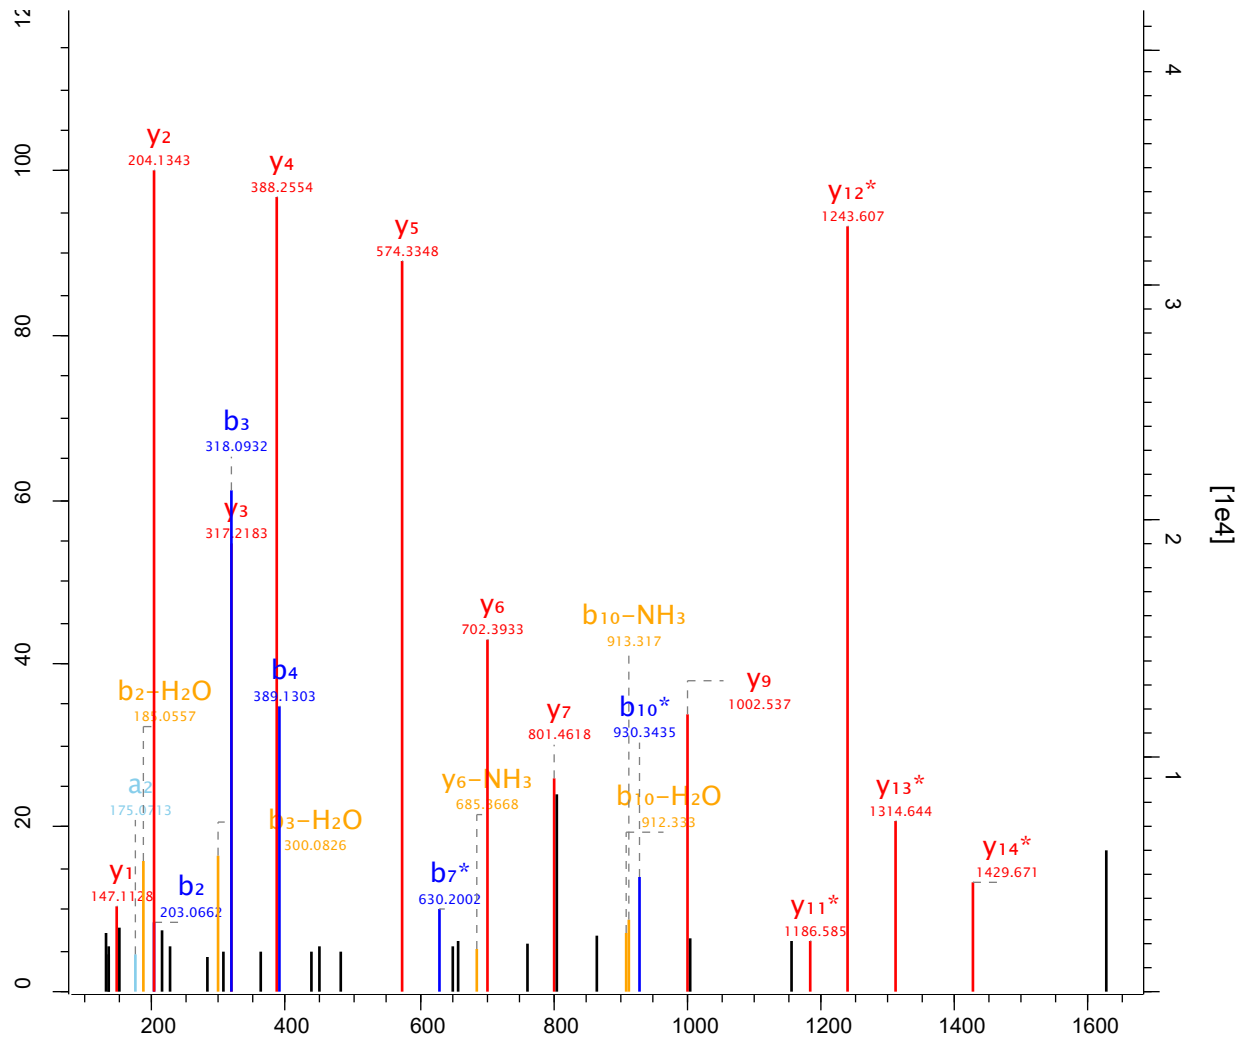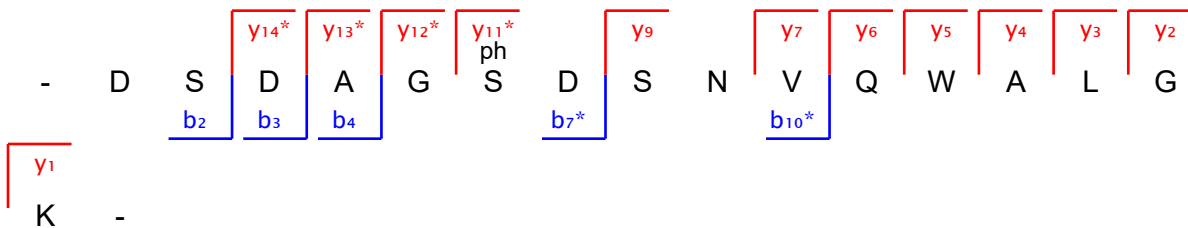



Raw file Scan Method Score m/z  
 sys\_00\_3short 30548 FTMS; HCD 106.57 769.9

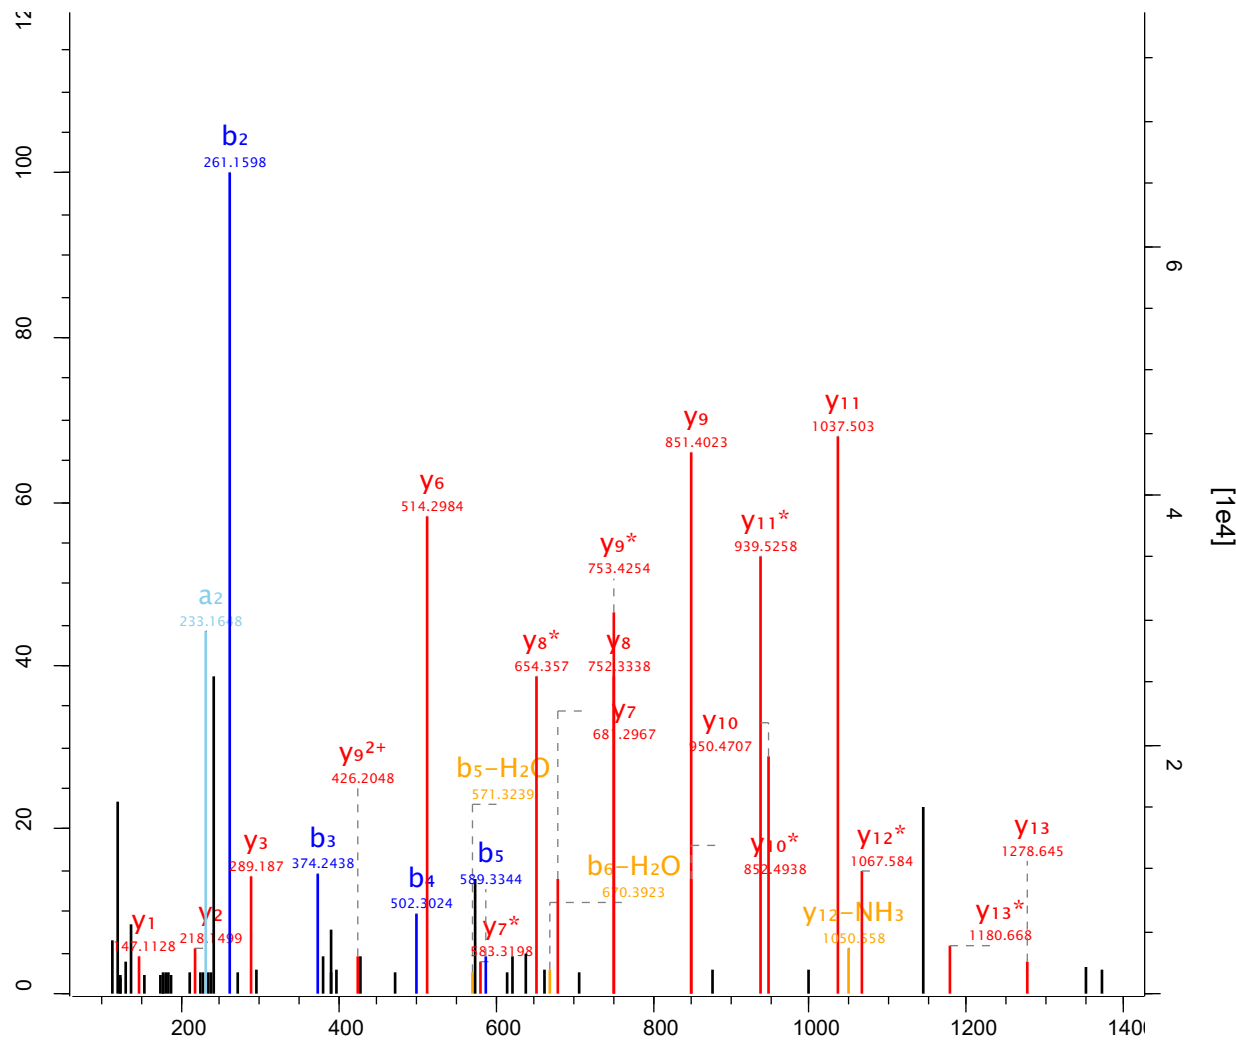

- F L L Q S V V A S P G A A A K  
 -    b2 b3 b4 b5  
 -    y13 y12\* y11 y10 y9 y8 y7<sup>ph</sup> y6  
 -    y13 y12\* y11 y10 y9 y8 y7<sup>ph</sup> y6  
 -    y3 y2 y1

Raw file Scan Method Score m/z  
 sys\_00\_3short 30791 FTMS; HCD 222.81 637.79

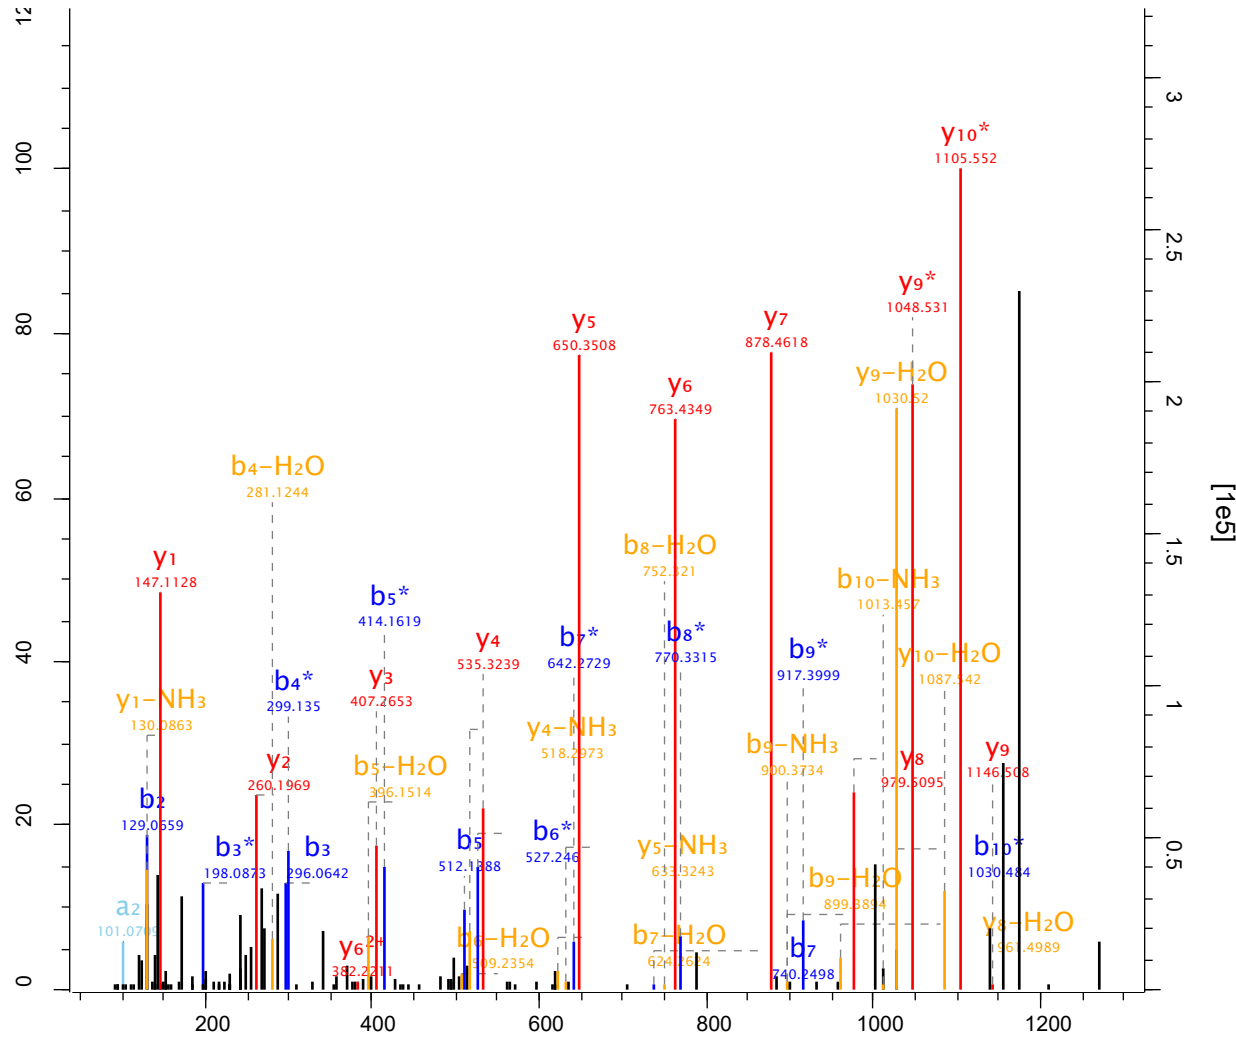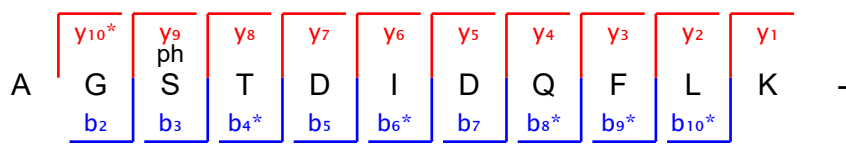

Raw file Scan Method Score m/z  
 sys\_00\_3short 30987 FTMS; HCD 126.71 721.33

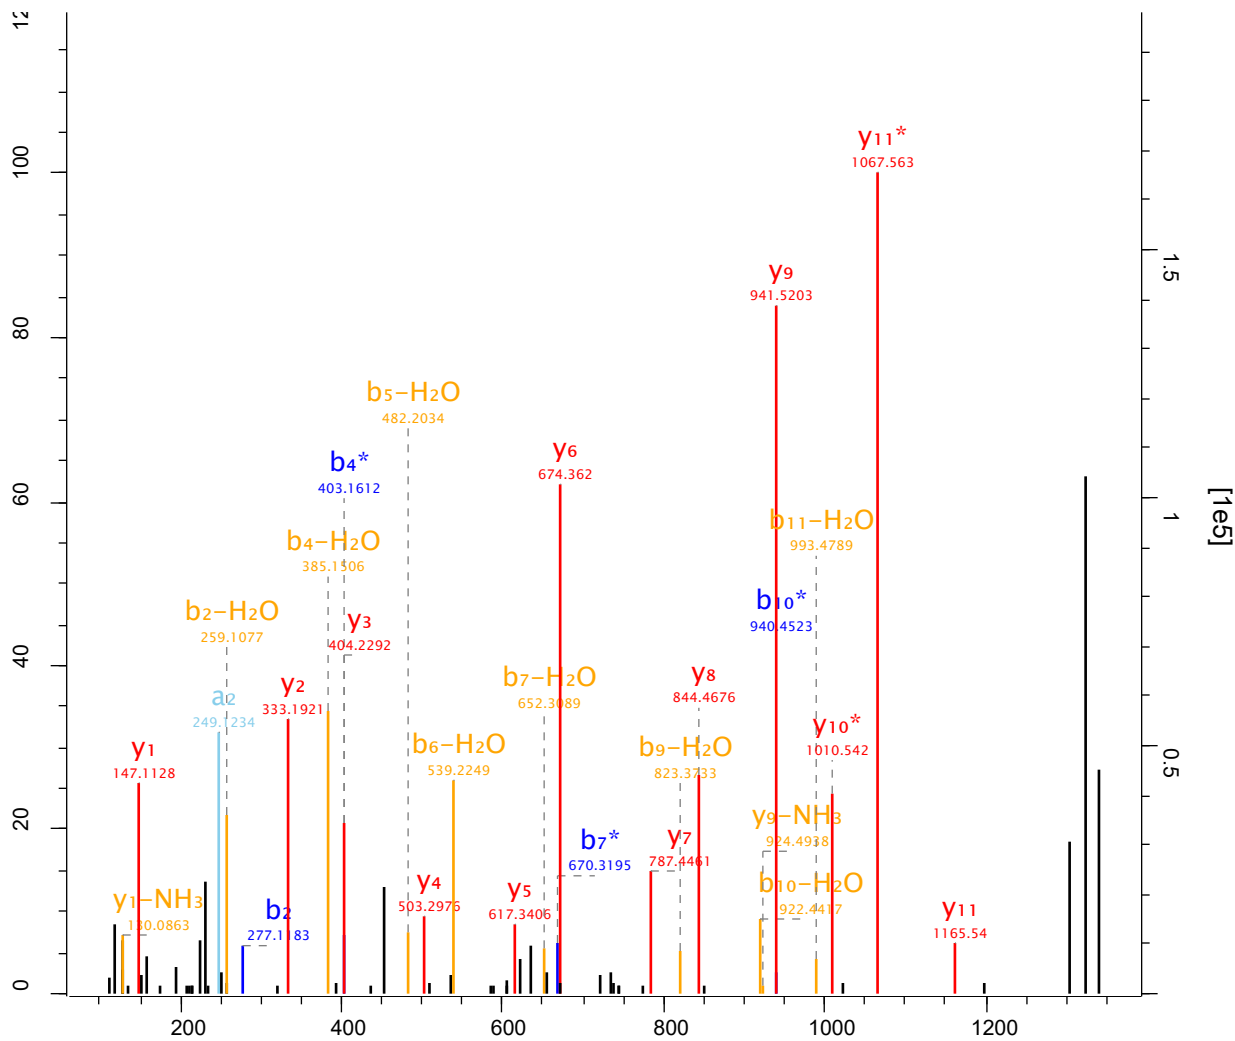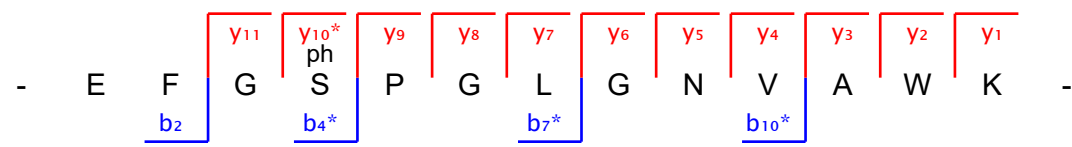

Raw file Scan Method Score m/z  
 sys\_00\_3short 31060 FTMS; HCD 80.75 626.81

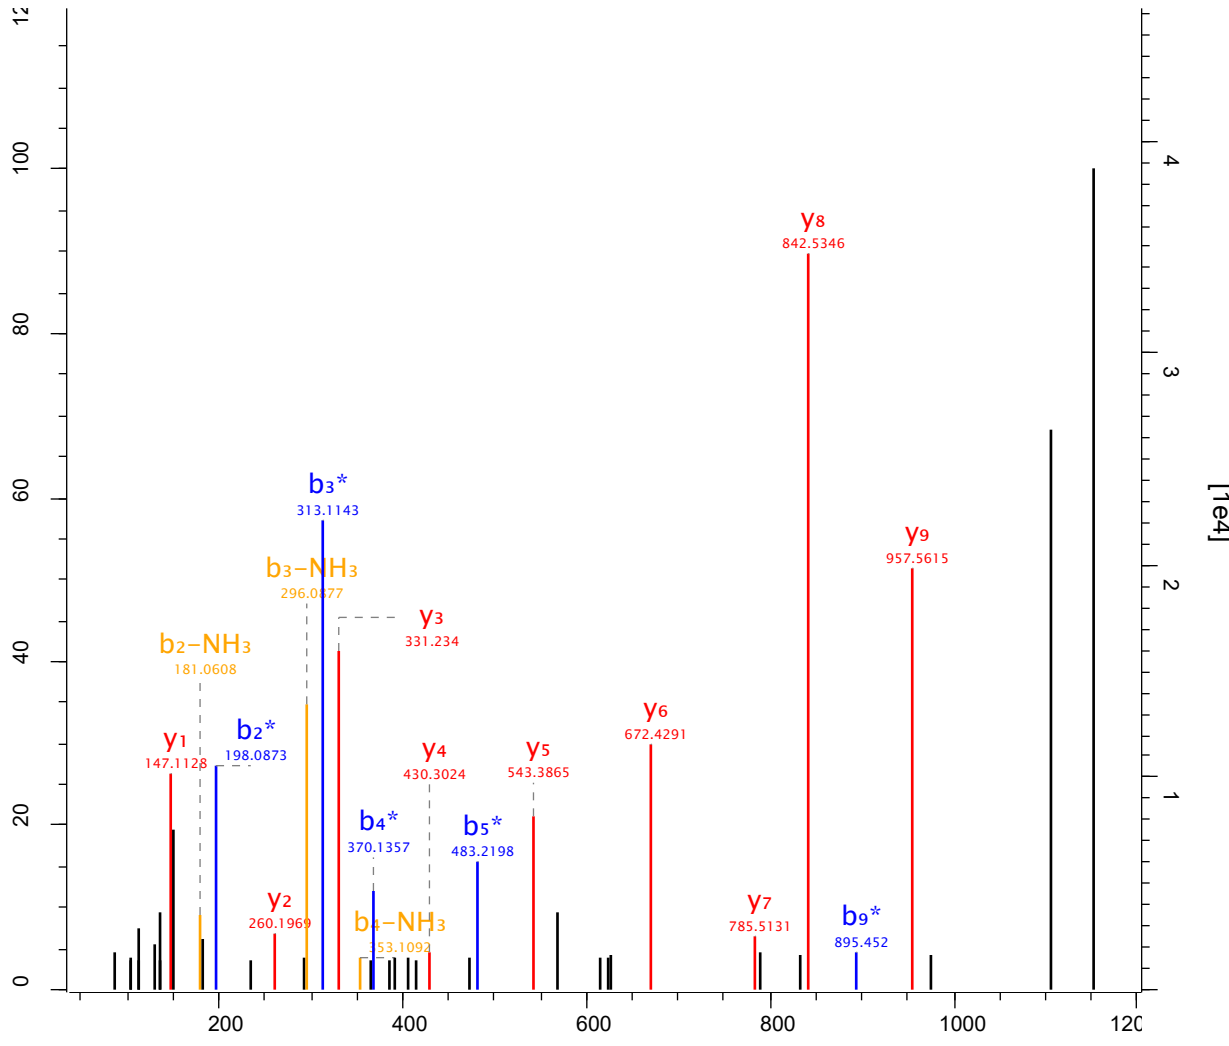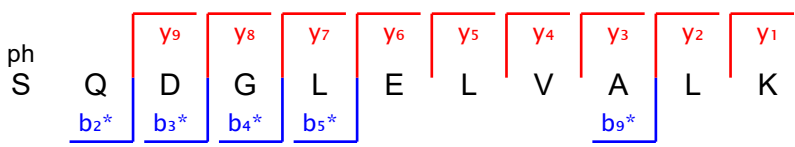

Raw file Scan Method Score m/z  
 sys\_00\_3short 31127 FTMS; HCD 206.62 837.33

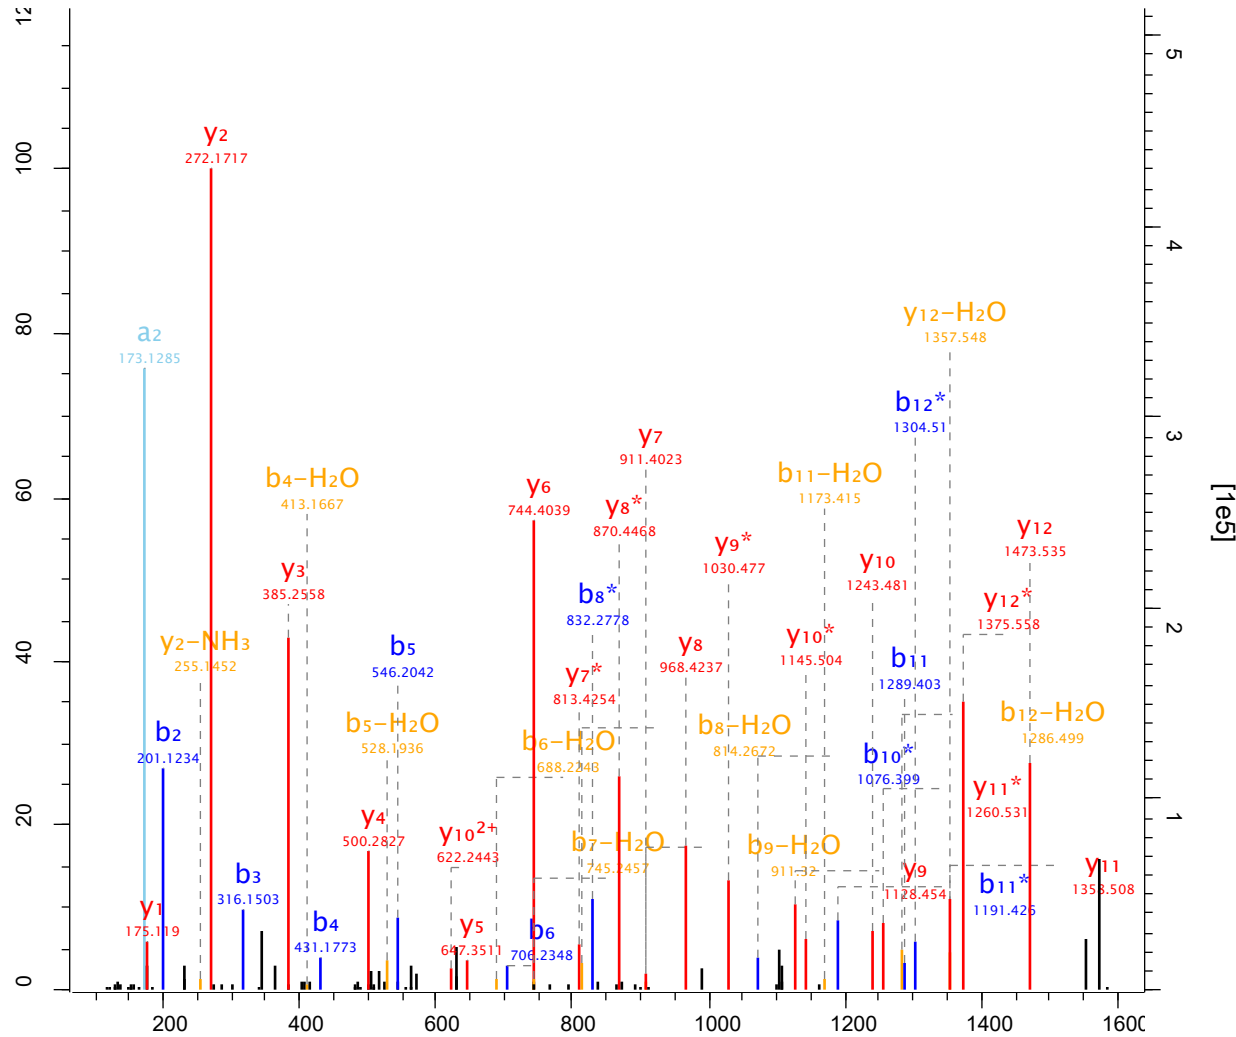

- S I D D D C G S P F D I P R -

b<sub>2</sub>
y<sub>12</sub>
y<sub>11</sub>
y<sub>10</sub>
y<sub>9</sub>
y<sub>8</sub>
y<sub>7</sub>
y<sub>6</sub>
y<sub>5</sub>
y<sub>4</sub>
y<sub>3</sub>
y<sub>2</sub>
y<sub>1</sub>

b<sub>3</sub>
b<sub>4</sub>
b<sub>5</sub>
b<sub>6</sub>
b<sub>8</sub>\*
b<sub>10</sub>\*
b<sub>11</sub>
b<sub>12</sub>\*

Raw file Scan Method Score m/z  
 sys\_00\_3short 31164 FTMS; HCD 272.72 844.83

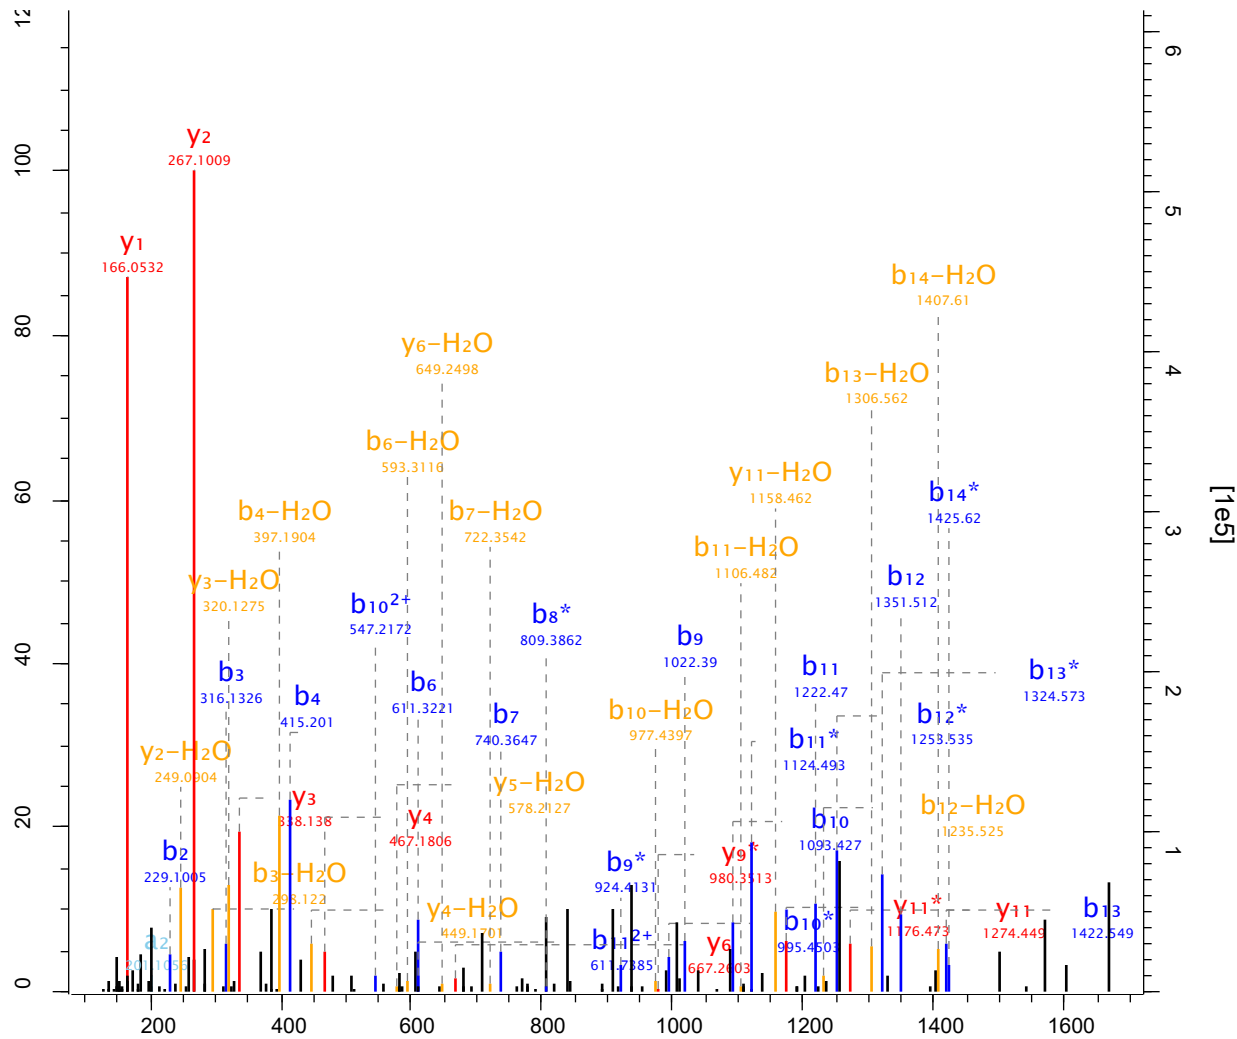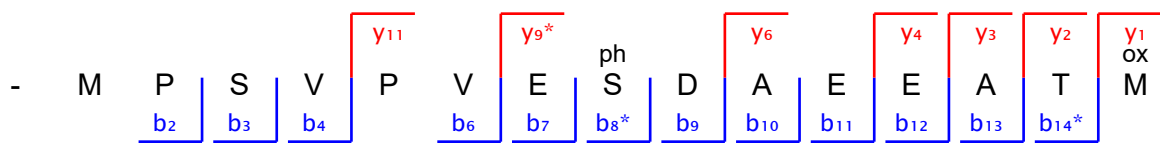

Raw file Scan Method Score m/z  
 sys\_00\_3short 31198 FTMS; HCD 67.65 816.37

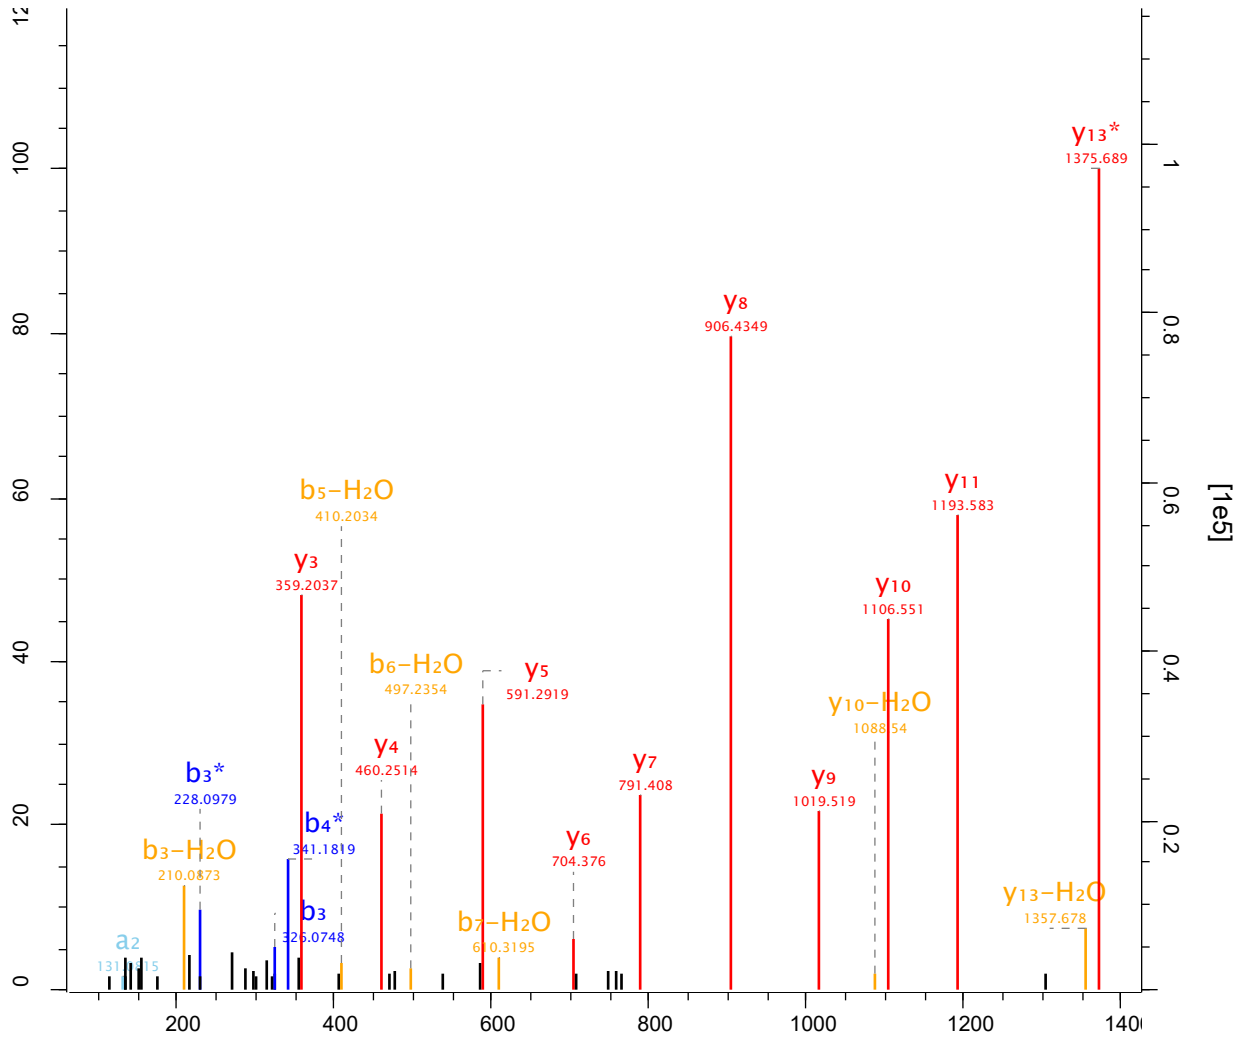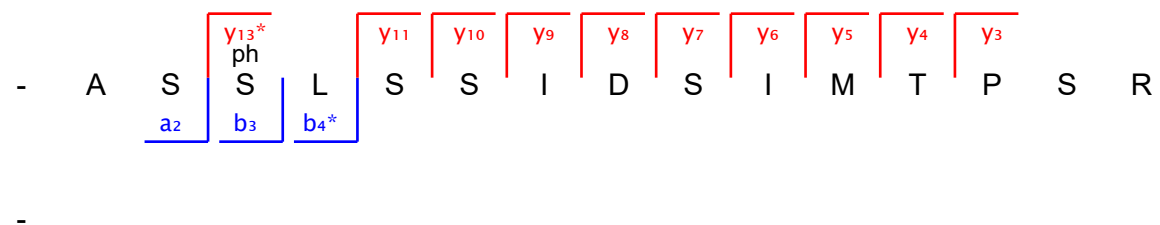

Raw file Scan Method Score m/z  
 sys\_00\_3short 31306 FTMS; HCD 54.34 617.77

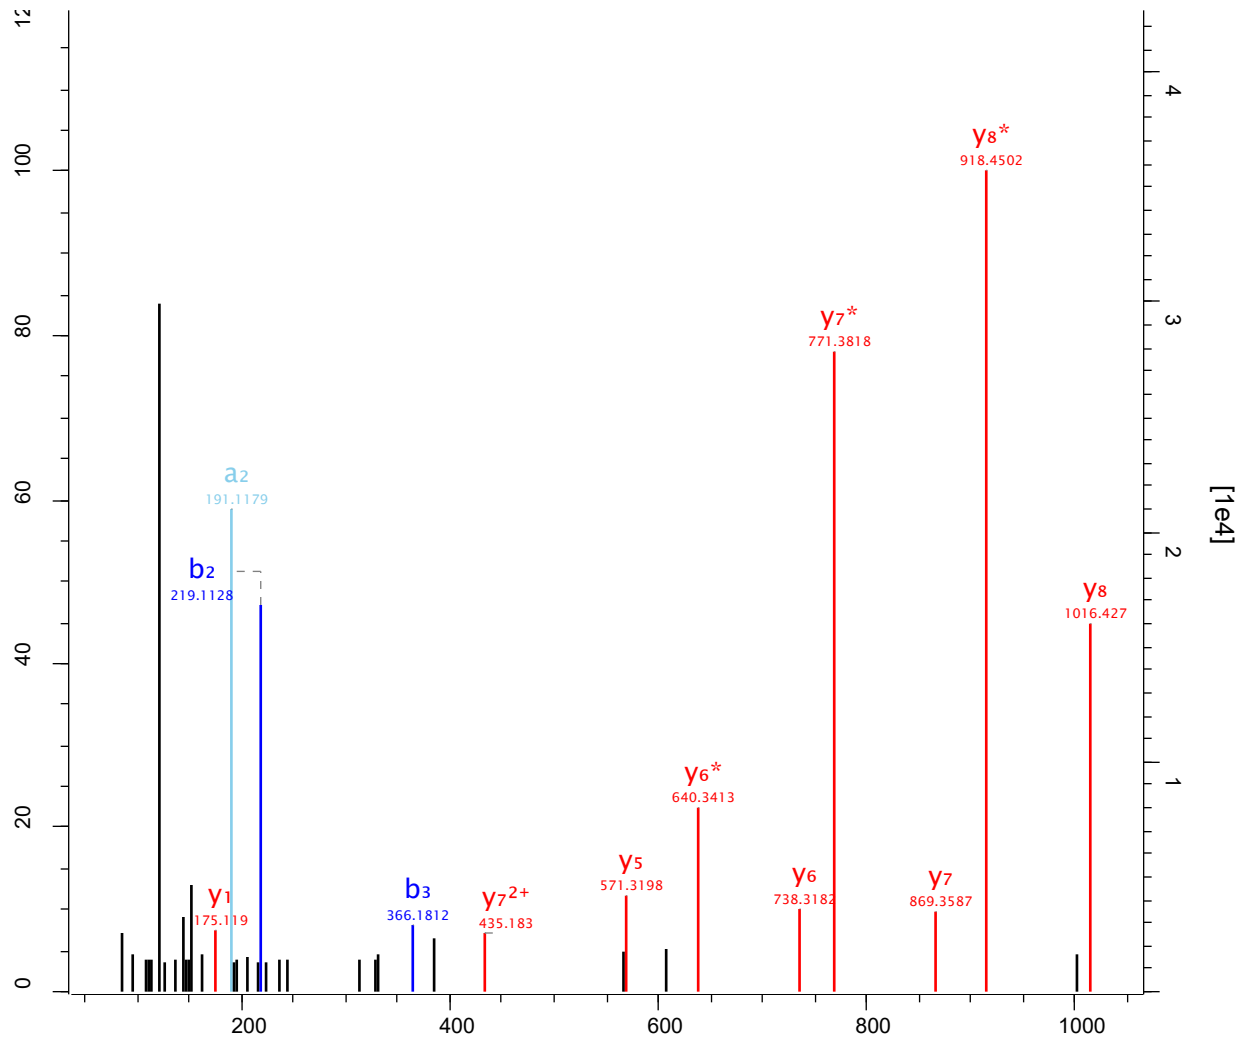

- A F F M S G P I E R -  
 b2 b3 y8 y7 y6 ph y5 y1



Raw file Scan Method Score m/z  
 sys\_00\_3short 31579 FTMS; HCD 82.01 787.35

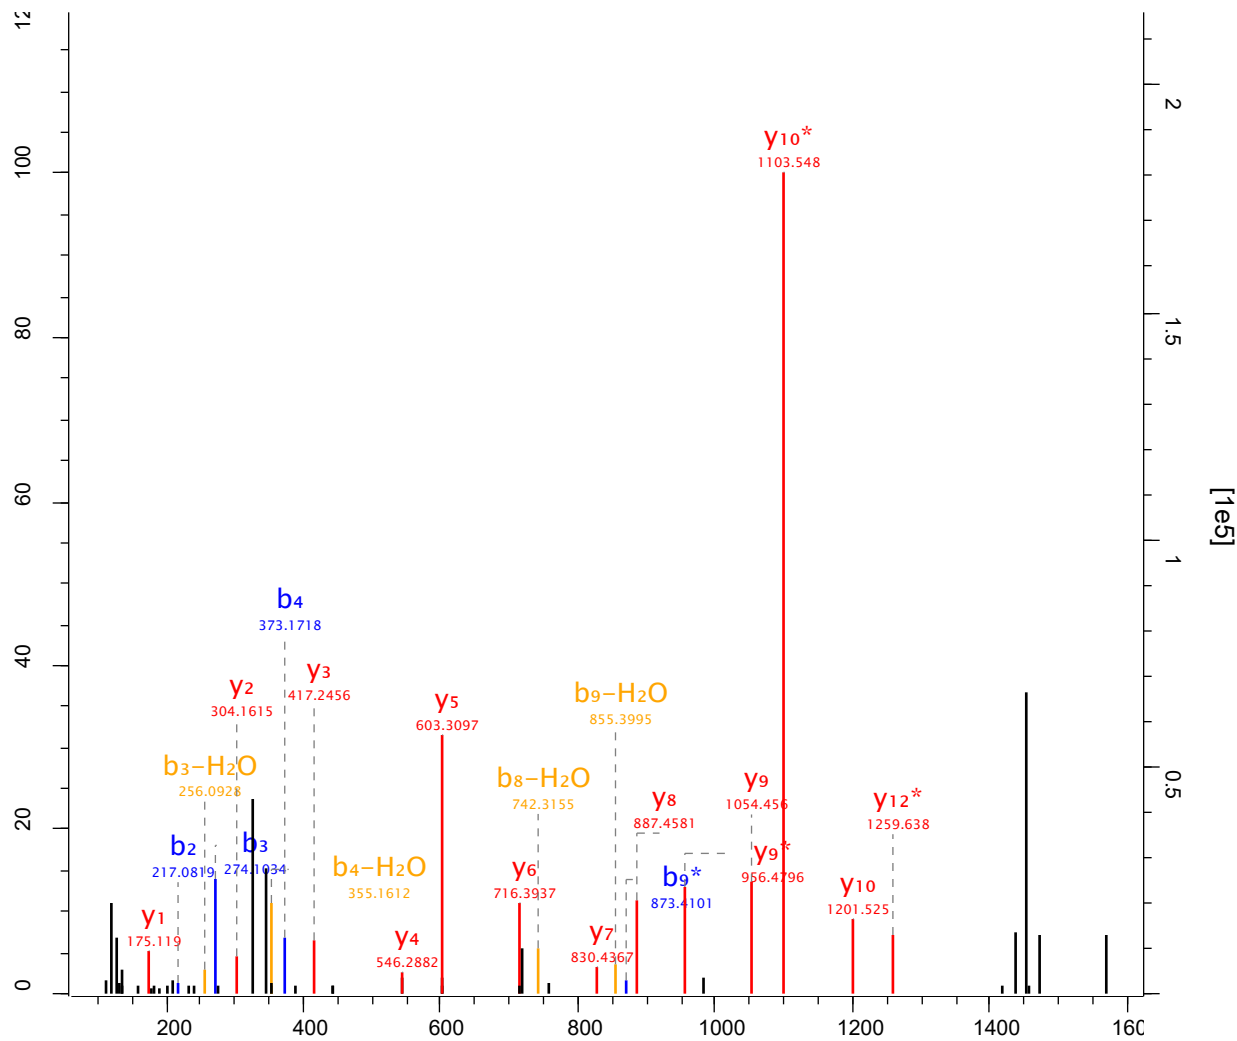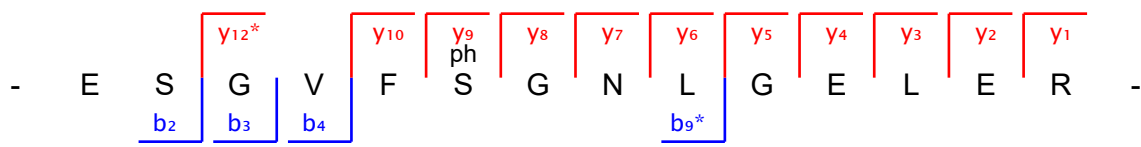

Raw file Scan Method Score m/z  
 sys\_00\_3short 31724 FTMS; HCD 78.19 700.32

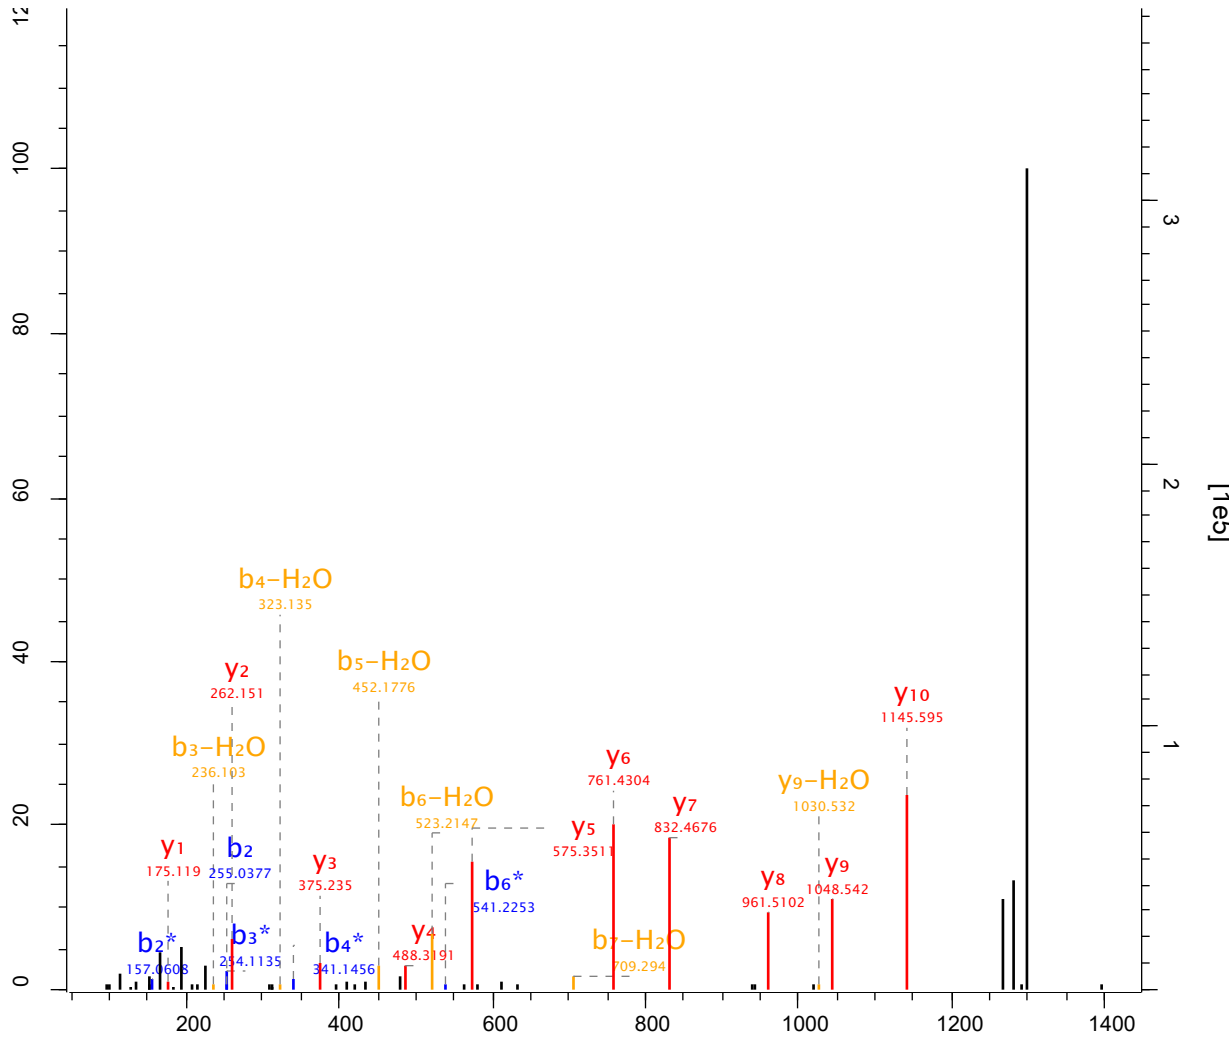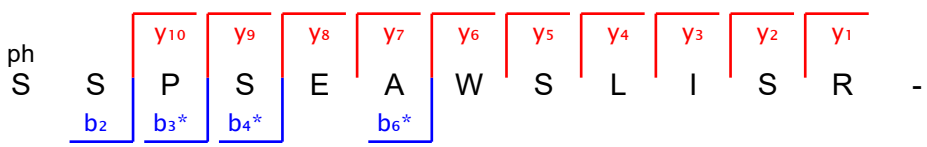



| Raw file      | Scan  | Method    | Score | m/z    |
|---------------|-------|-----------|-------|--------|
| sys_00_3short | 32041 | FTMS; HCD | 65.18 | 599.75 |

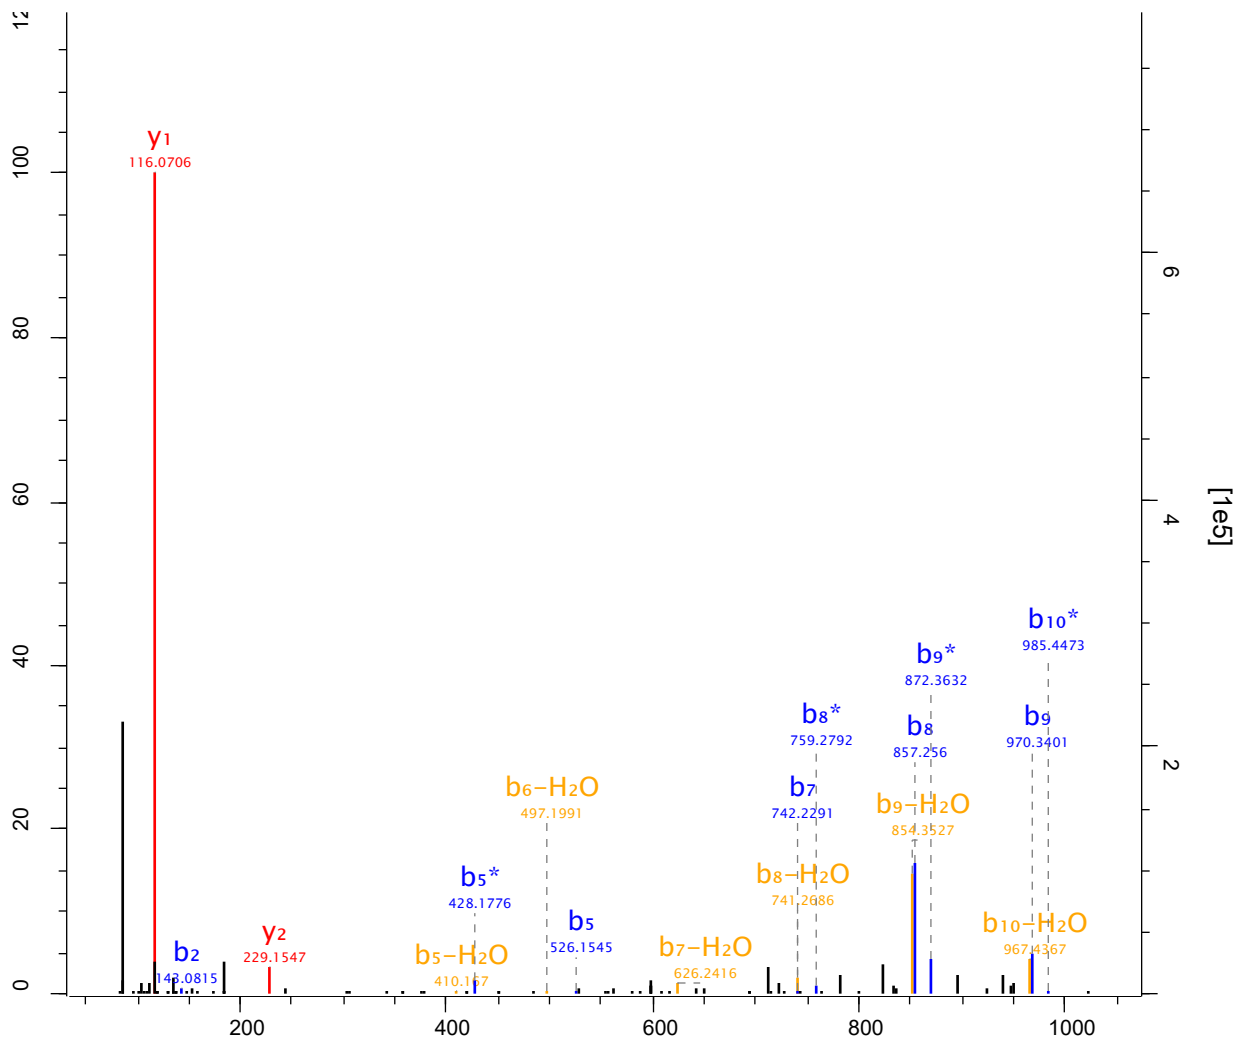

- A A ph S S E S E D L L y2 y1 P -

b2 b5 b7 b8 b9 b10\*

Raw file Scan Method Score m/z  
 sys\_00\_3short 3291 FTMS; HCD 72.29 577.23

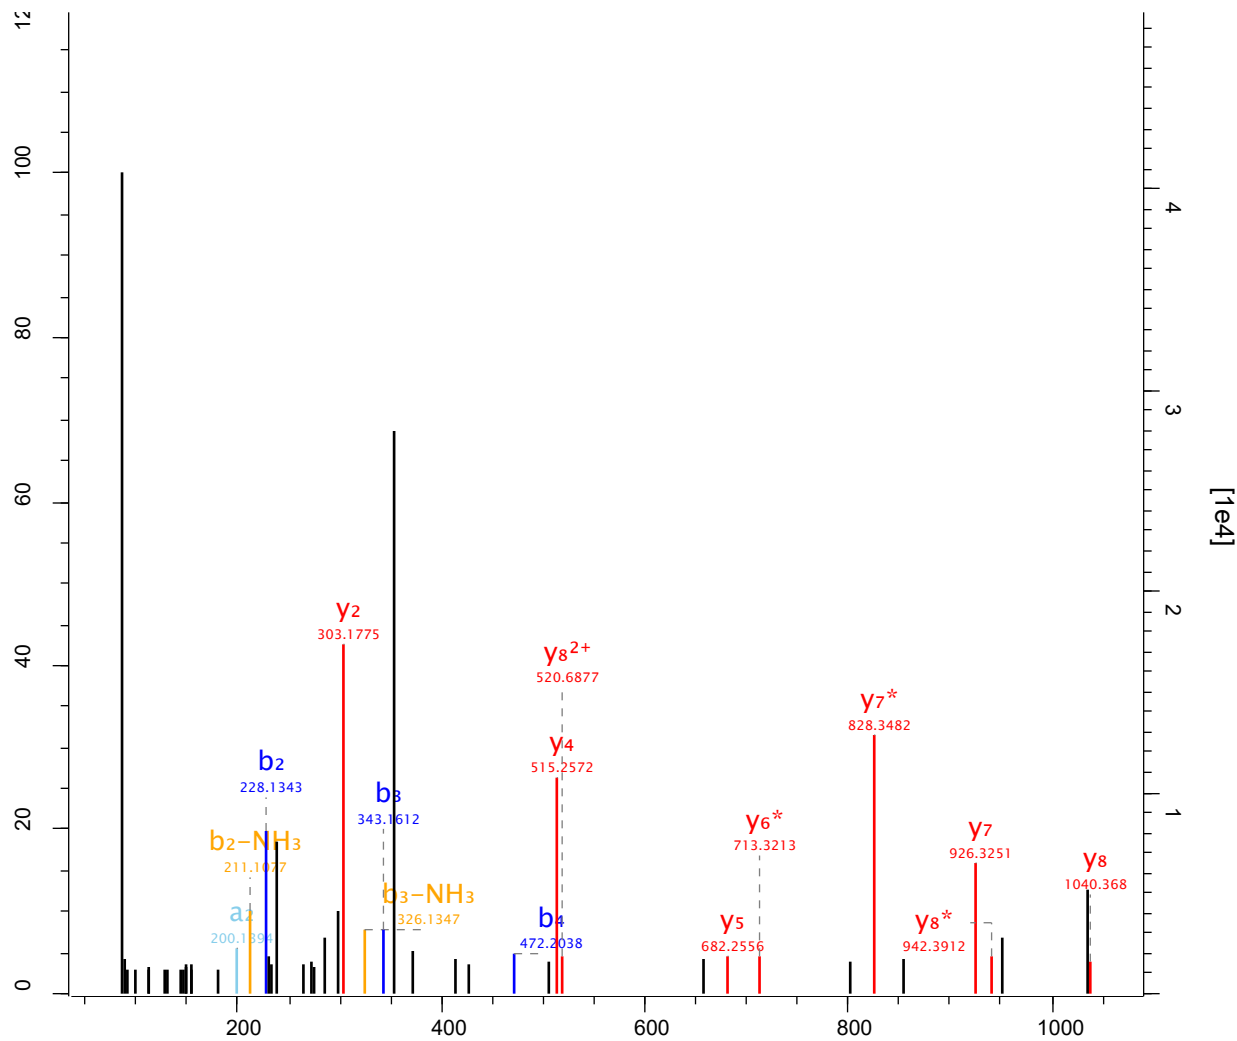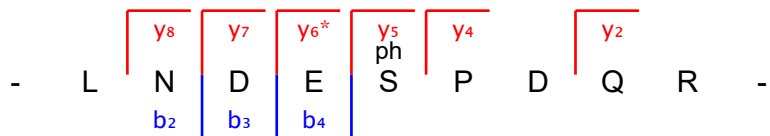

Raw file Scan Method Score m/z  
 sys\_00\_3short 33357 FTMS; HCD 53.24 651.29

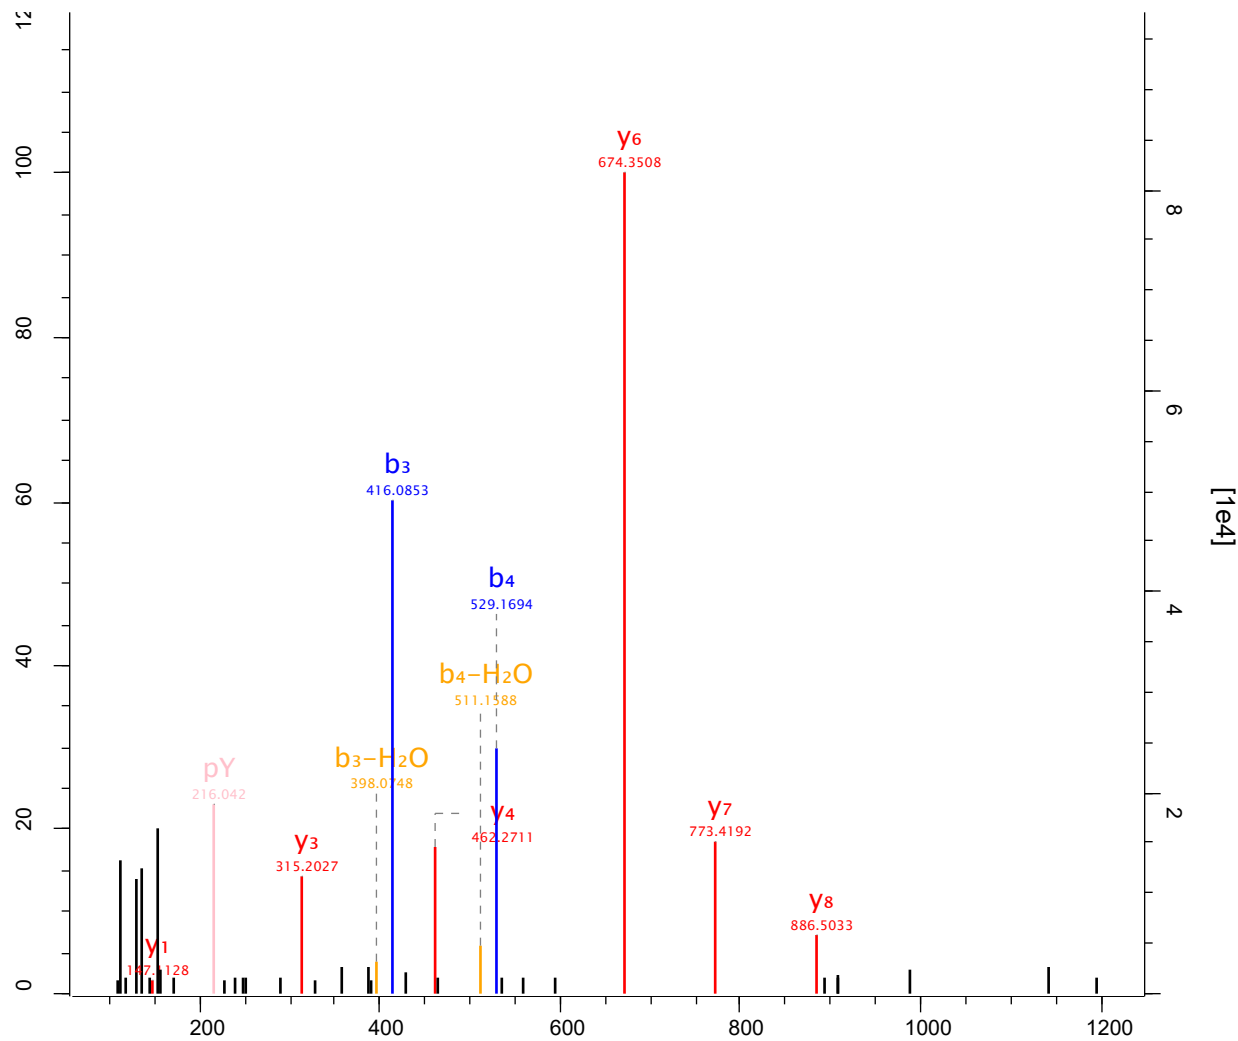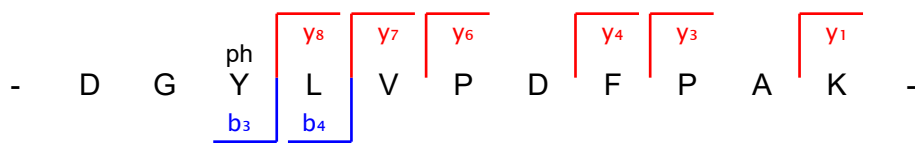

Raw file Scan Method Score m/z  
 sys\_00\_3short 33404 FTMS; HCD 130.89 997.38

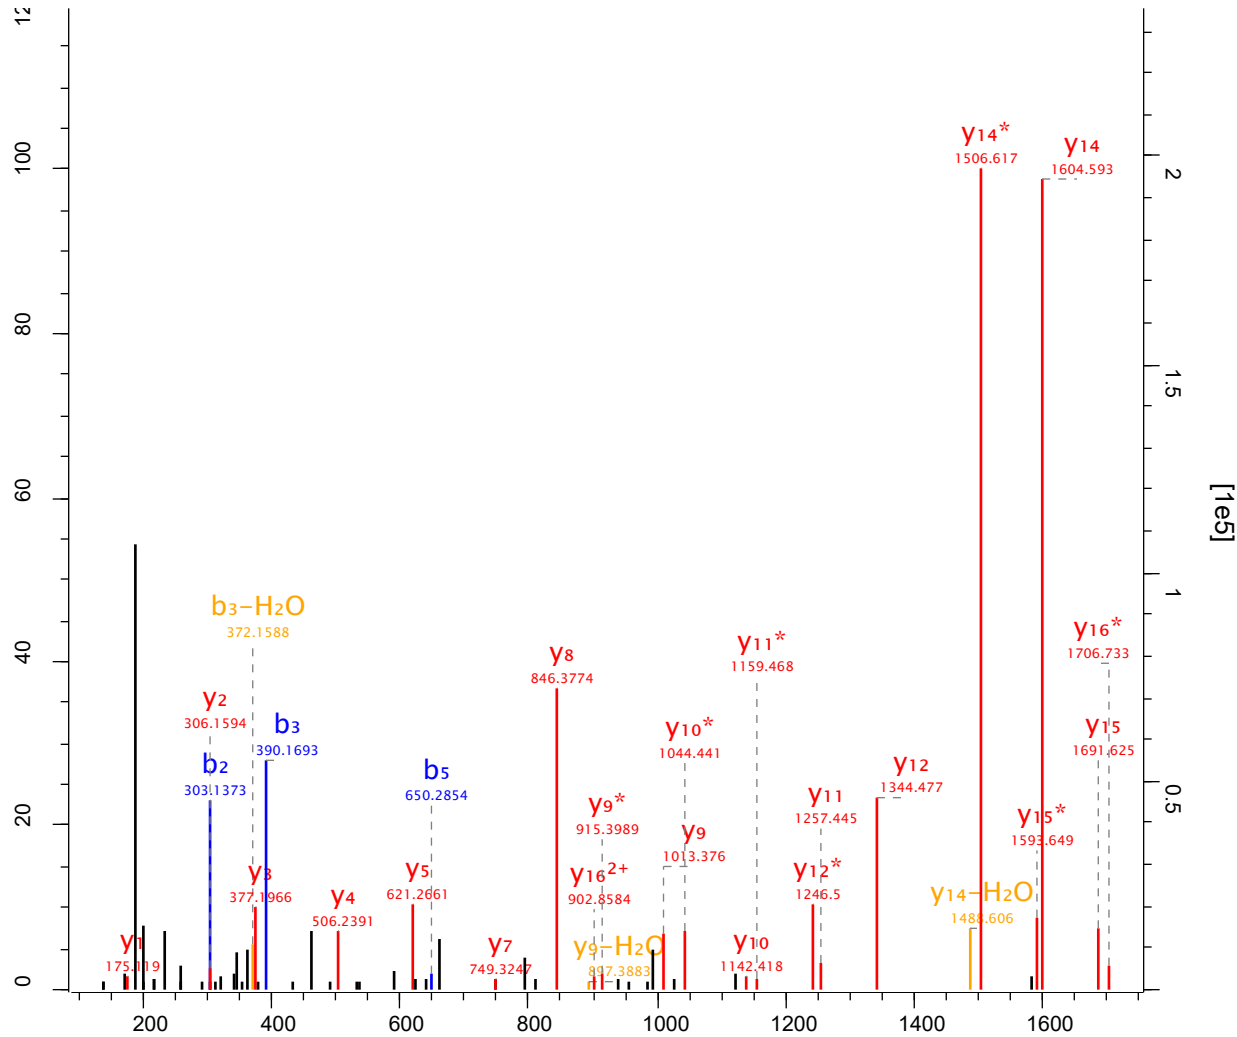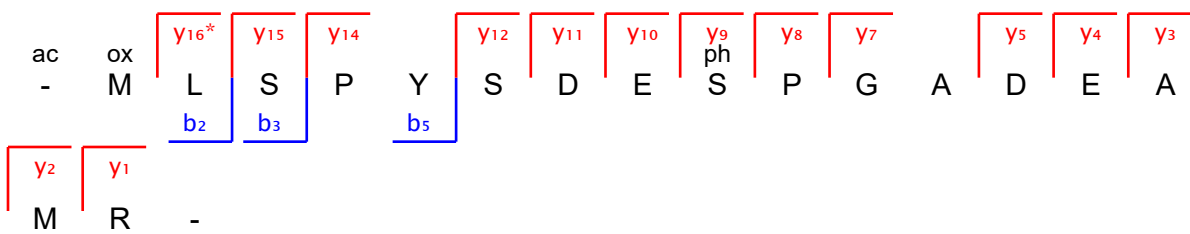

| Raw file      | Scan  | Method    | Score | m/z    |
|---------------|-------|-----------|-------|--------|
| sys_00_3short | 33606 | FTMS; HCD | 42.78 | 607.28 |

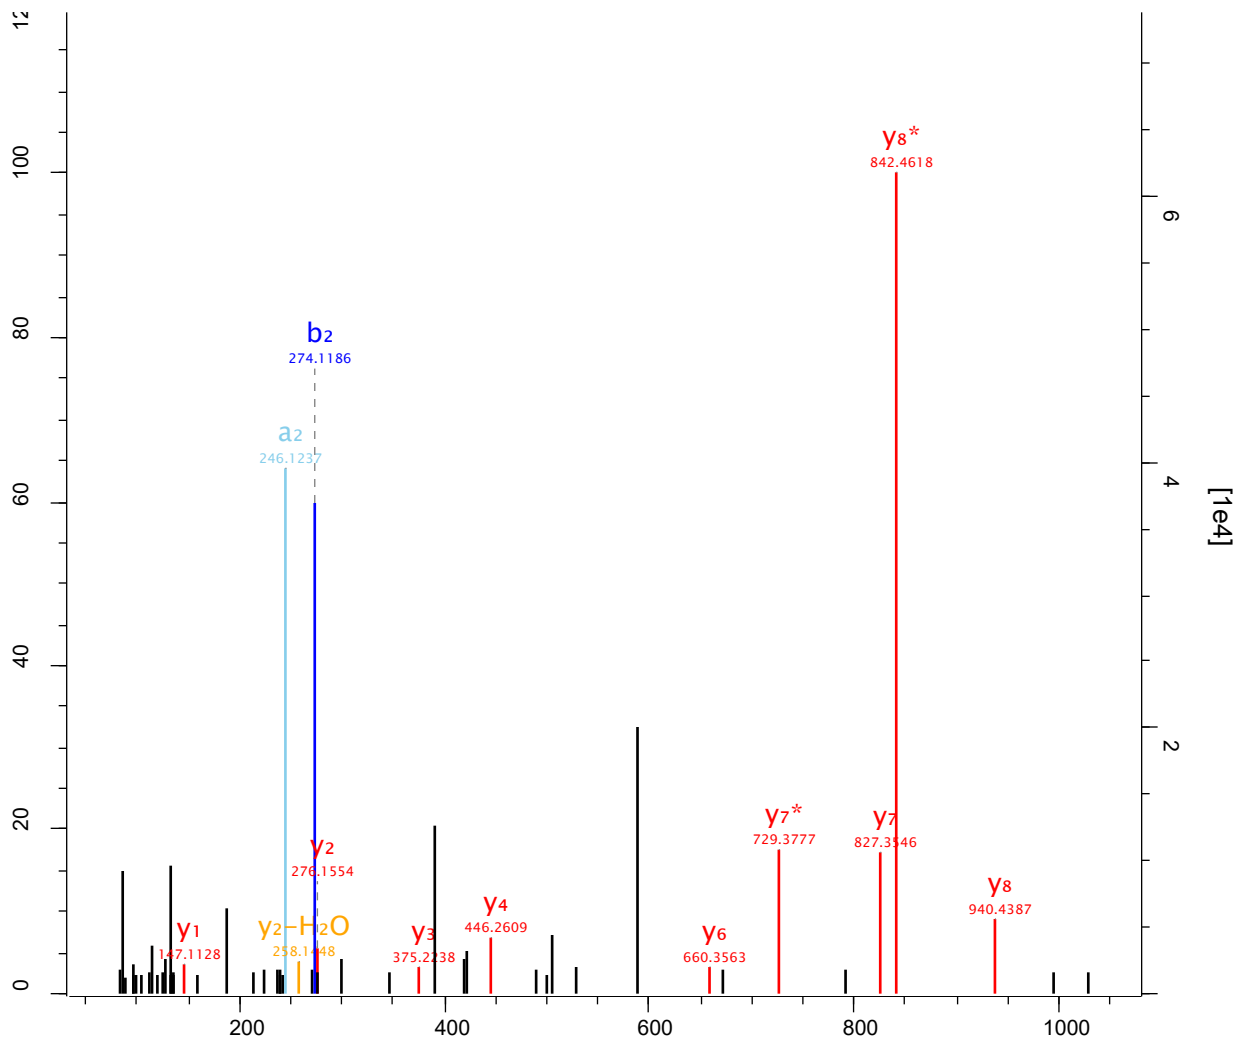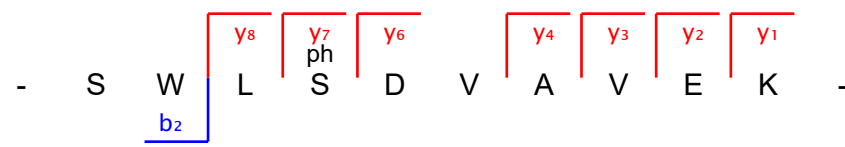



Raw file Scan Method Score m/z  
 sys\_00\_3short 33950 FTMS; HCD 57.29 796.36

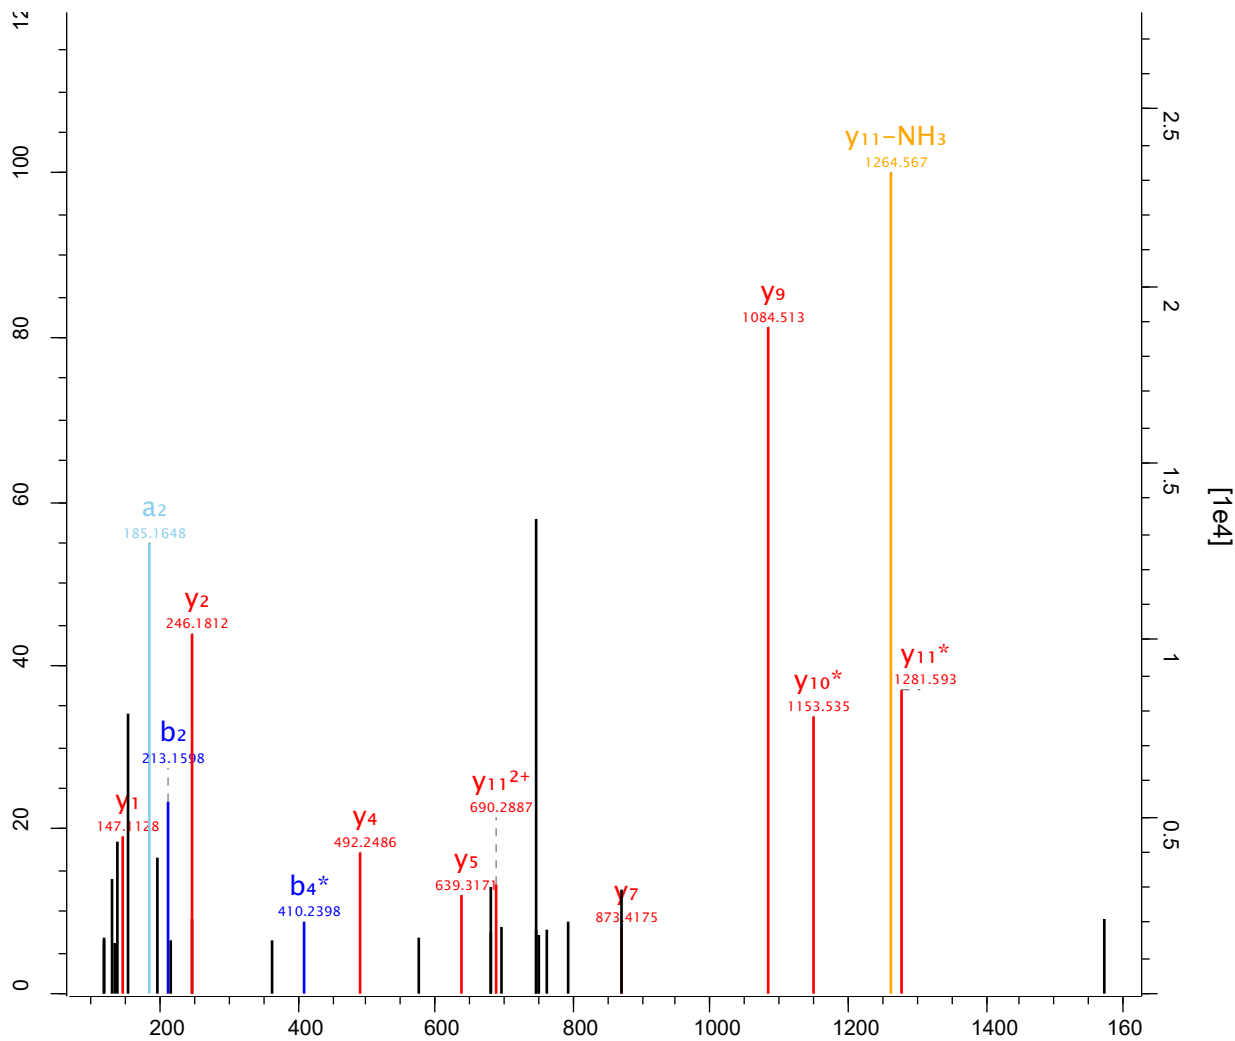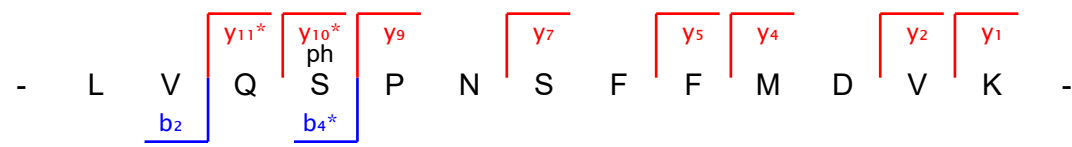

Raw file Scan Method Score m/z  
 sys\_00\_3short 34236 FTMS; HCD 135.91 599.76

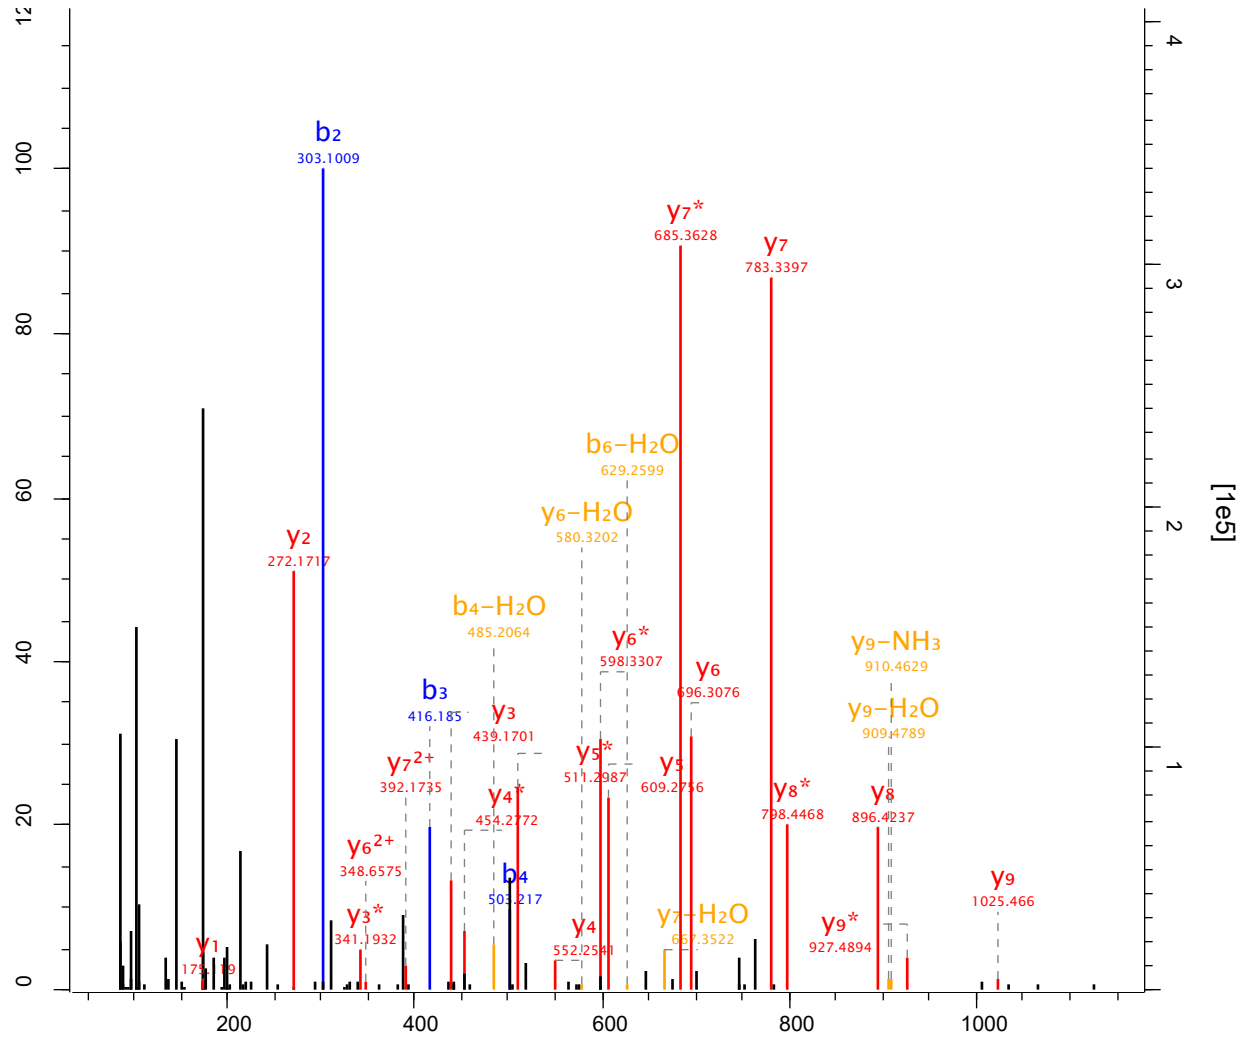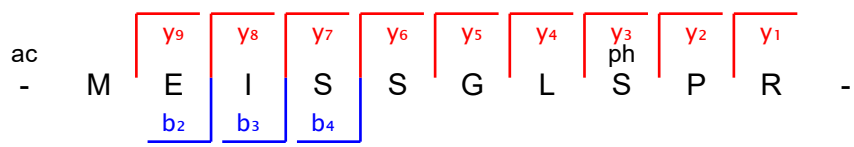

Raw file Scan Method Score m/z  
 sys\_00\_3short 3469 FTMS; HCD 83.2 526.74

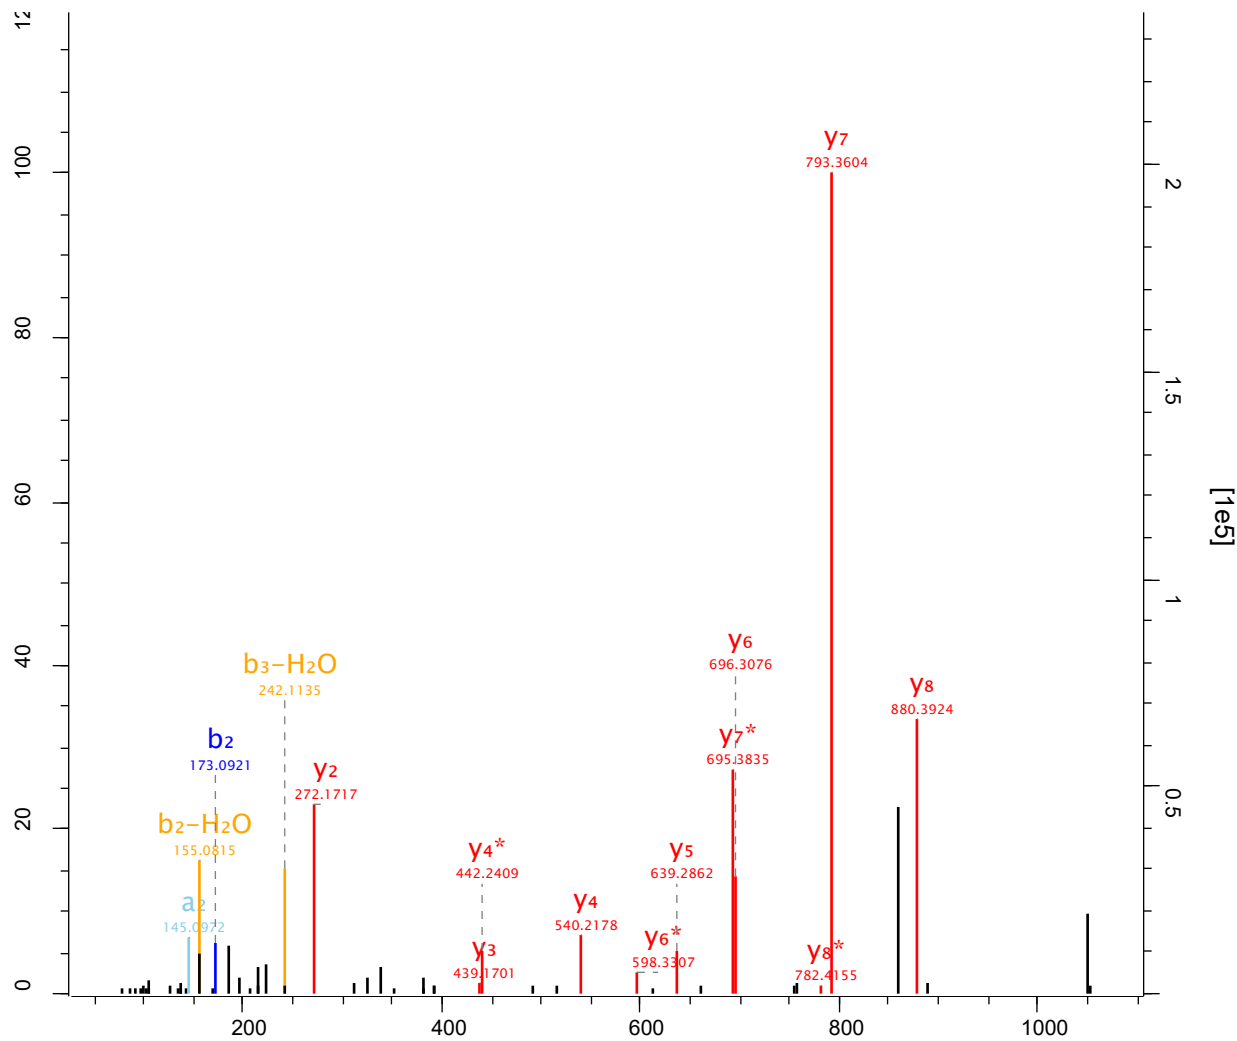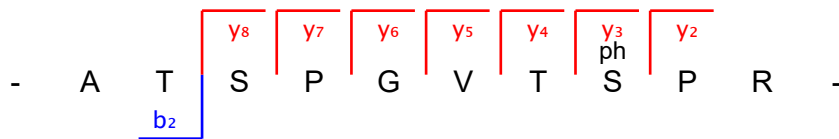

Raw file Scan Method Score m/z  
 sys\_00\_3short 34878 FTMS; HCD 219.95 836.83

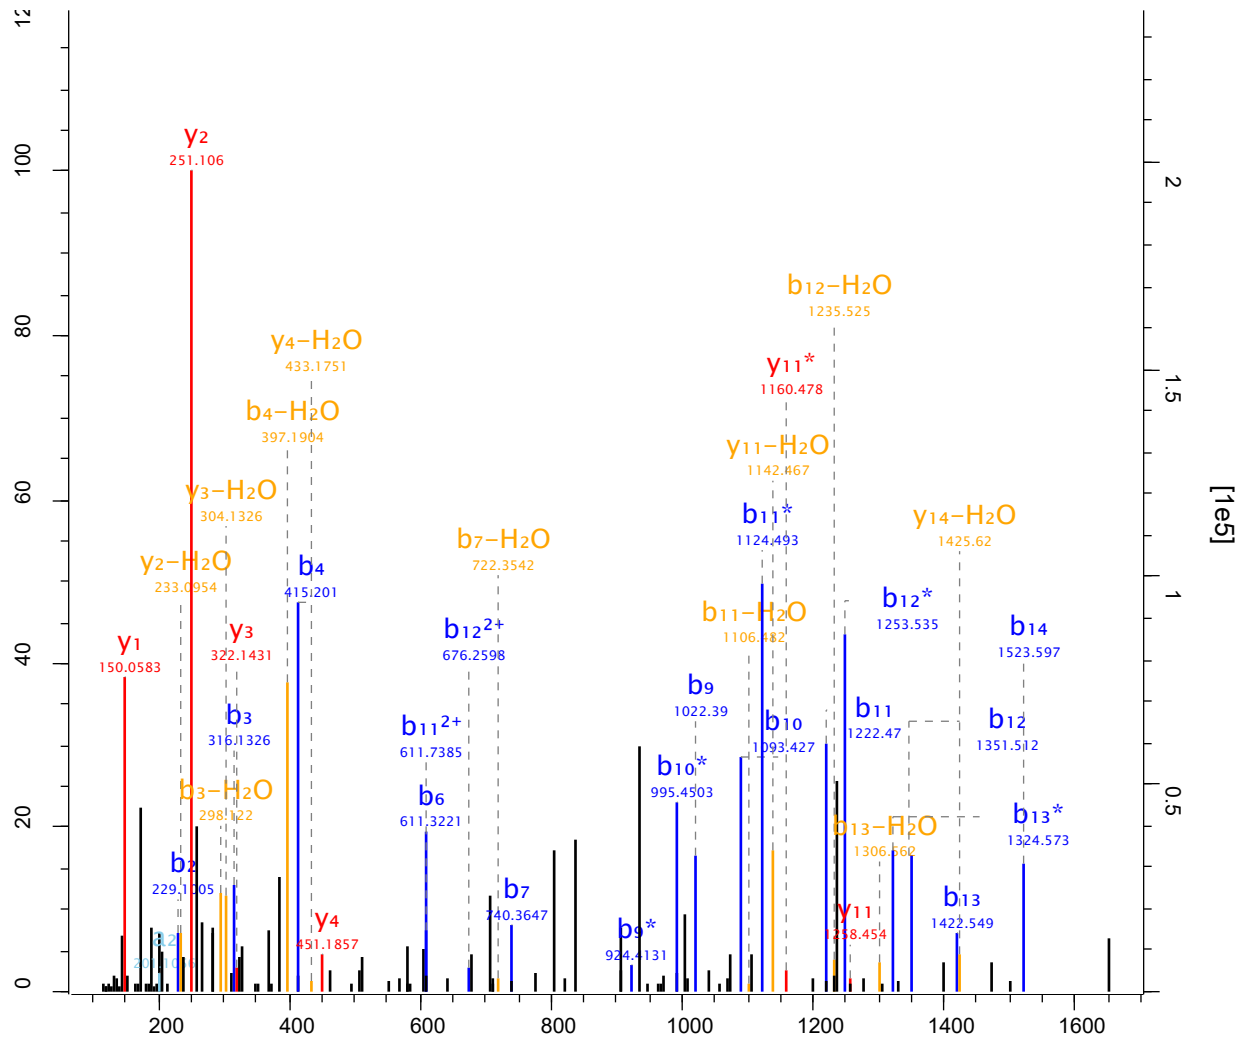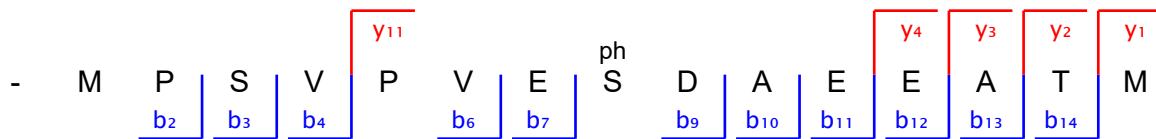

Raw file Scan Method Score m/z  
 sys\_00\_3short 3573 FTMS; HCD 71.61 482.19

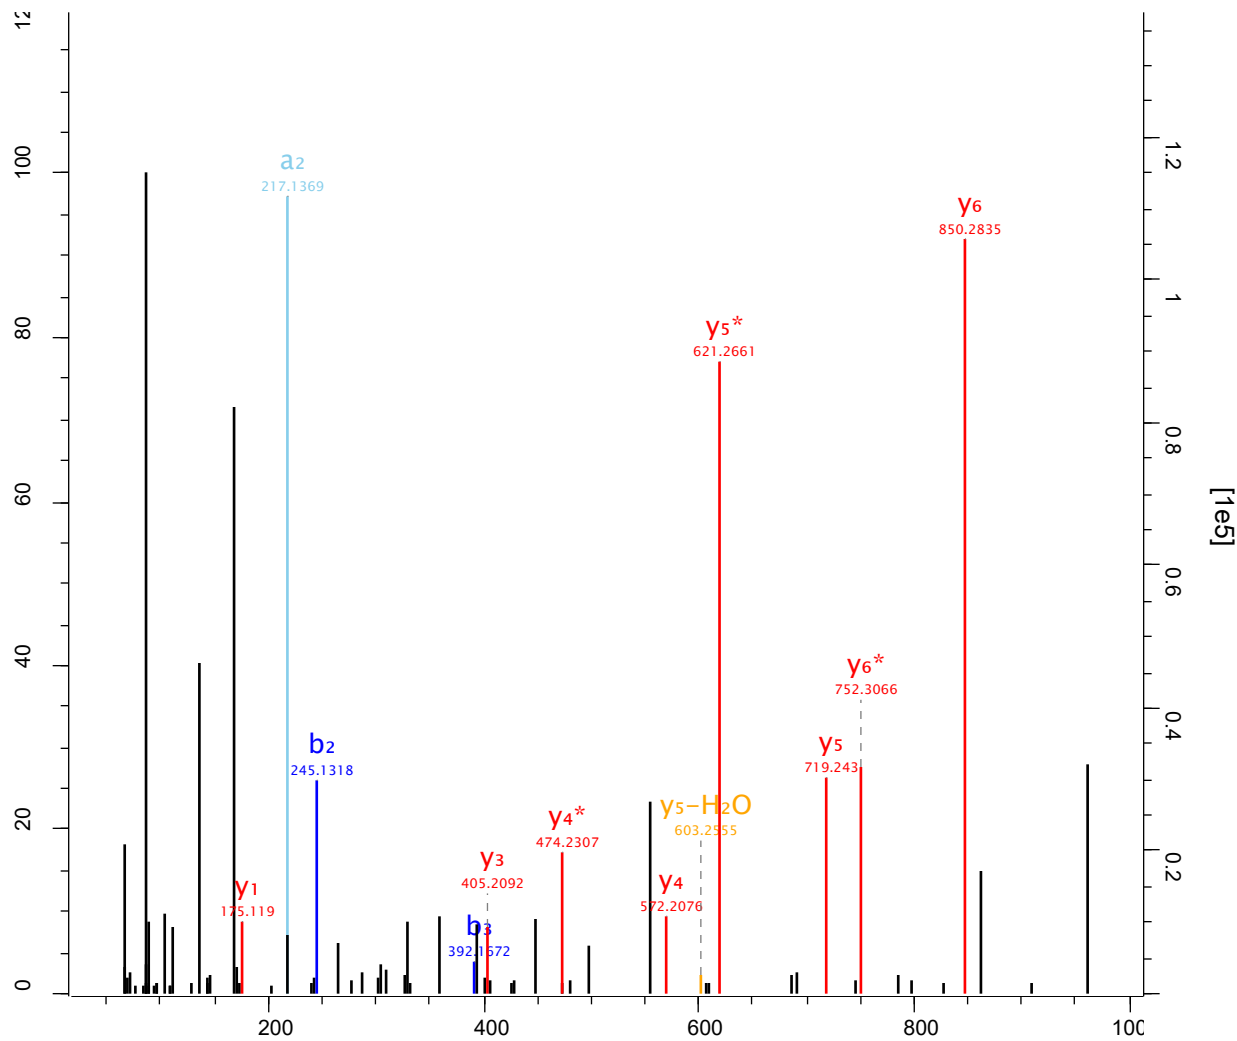

- L M S T E R -

b<sub>2</sub>
y<sub>5</sub> ox
b<sub>3</sub>
y<sub>6</sub>
y<sub>4</sub> ph
y<sub>3</sub>
y<sub>1</sub>

Raw file Scan Method Score m/z  
 sys\_00\_3short 3584 FTMS; HCD 68.52 457.21

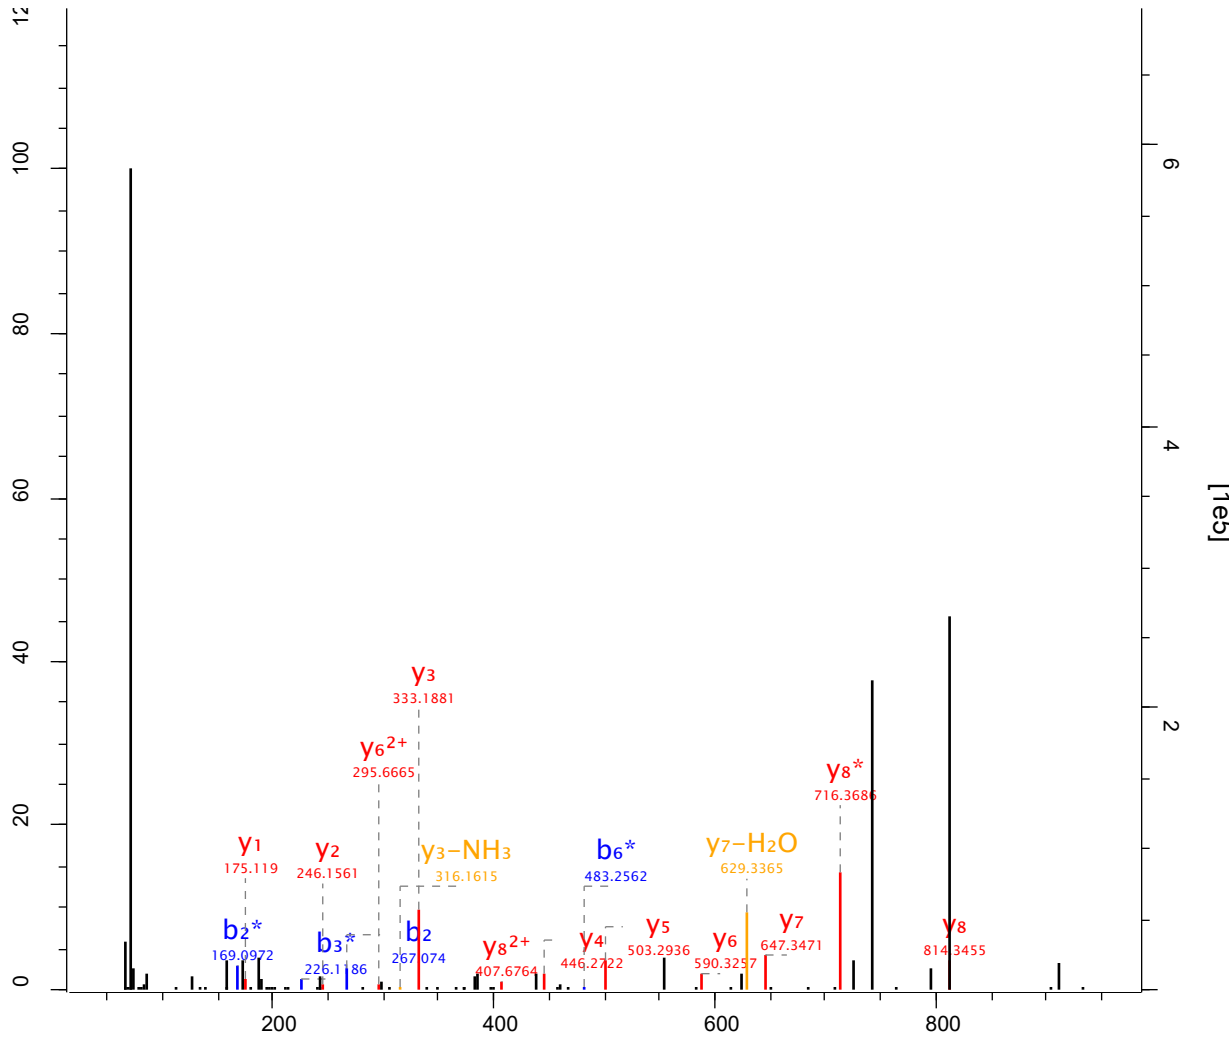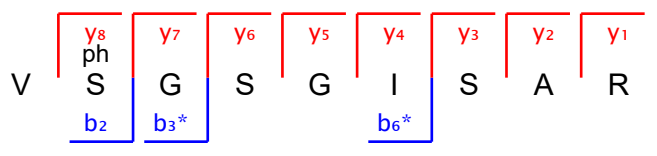

Raw file Scan Method Score m/z  
 sys\_00\_3short 3758 FTMS; HCD 119.51 636.76

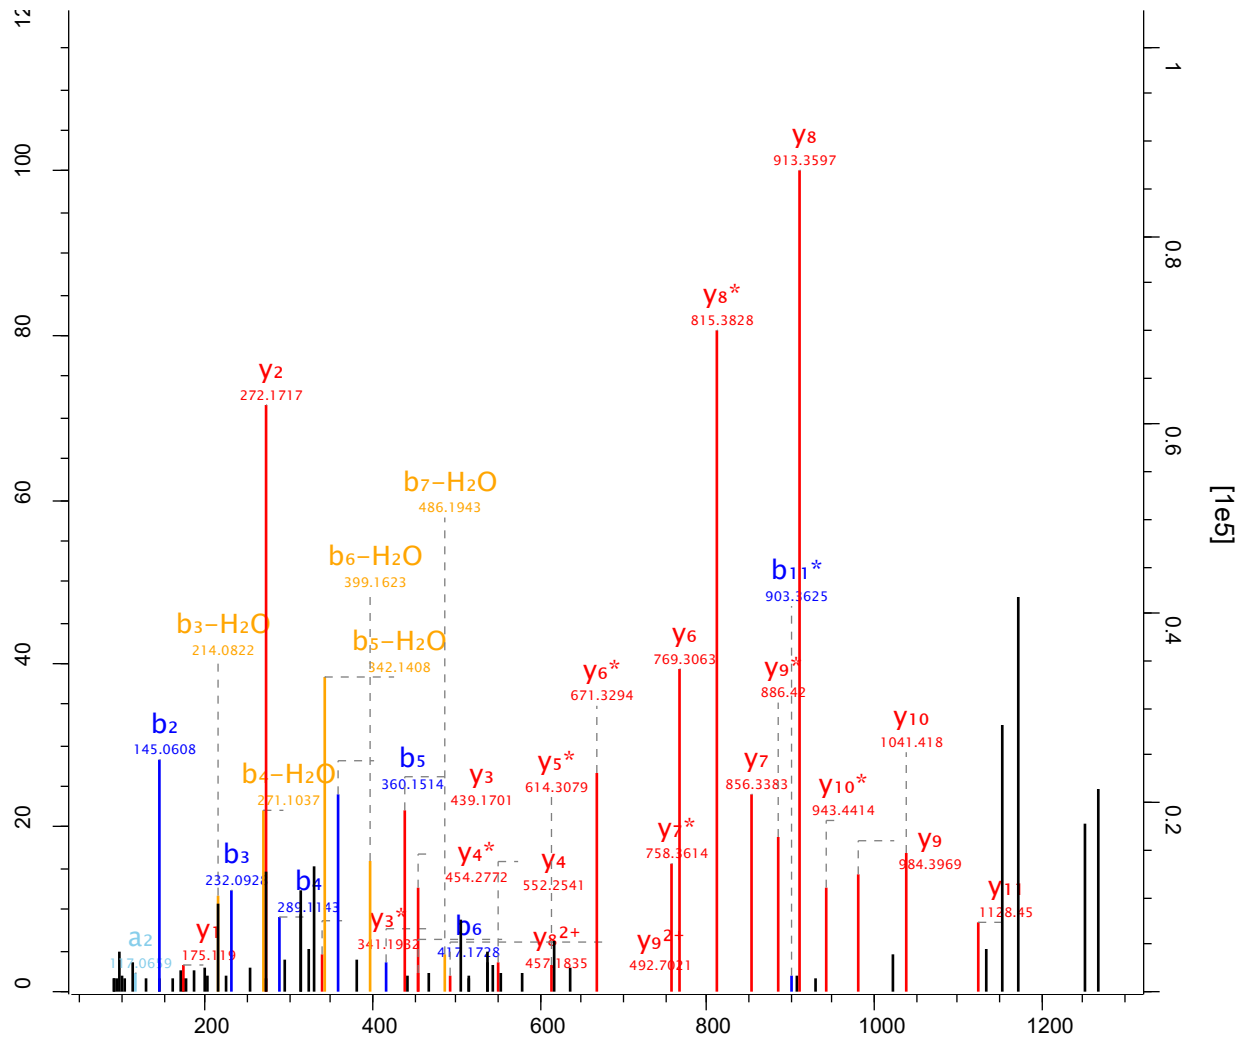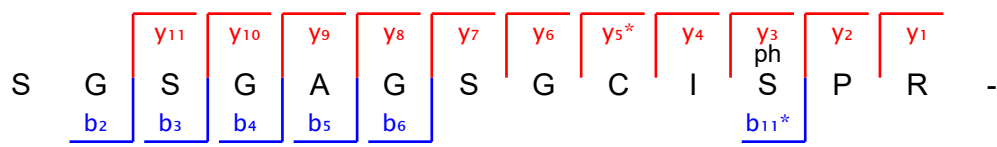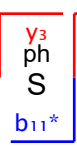

Raw file Scan Method Score m/z  
 sys\_00\_3short 4082 FTMS; HCD 107.06 536.25

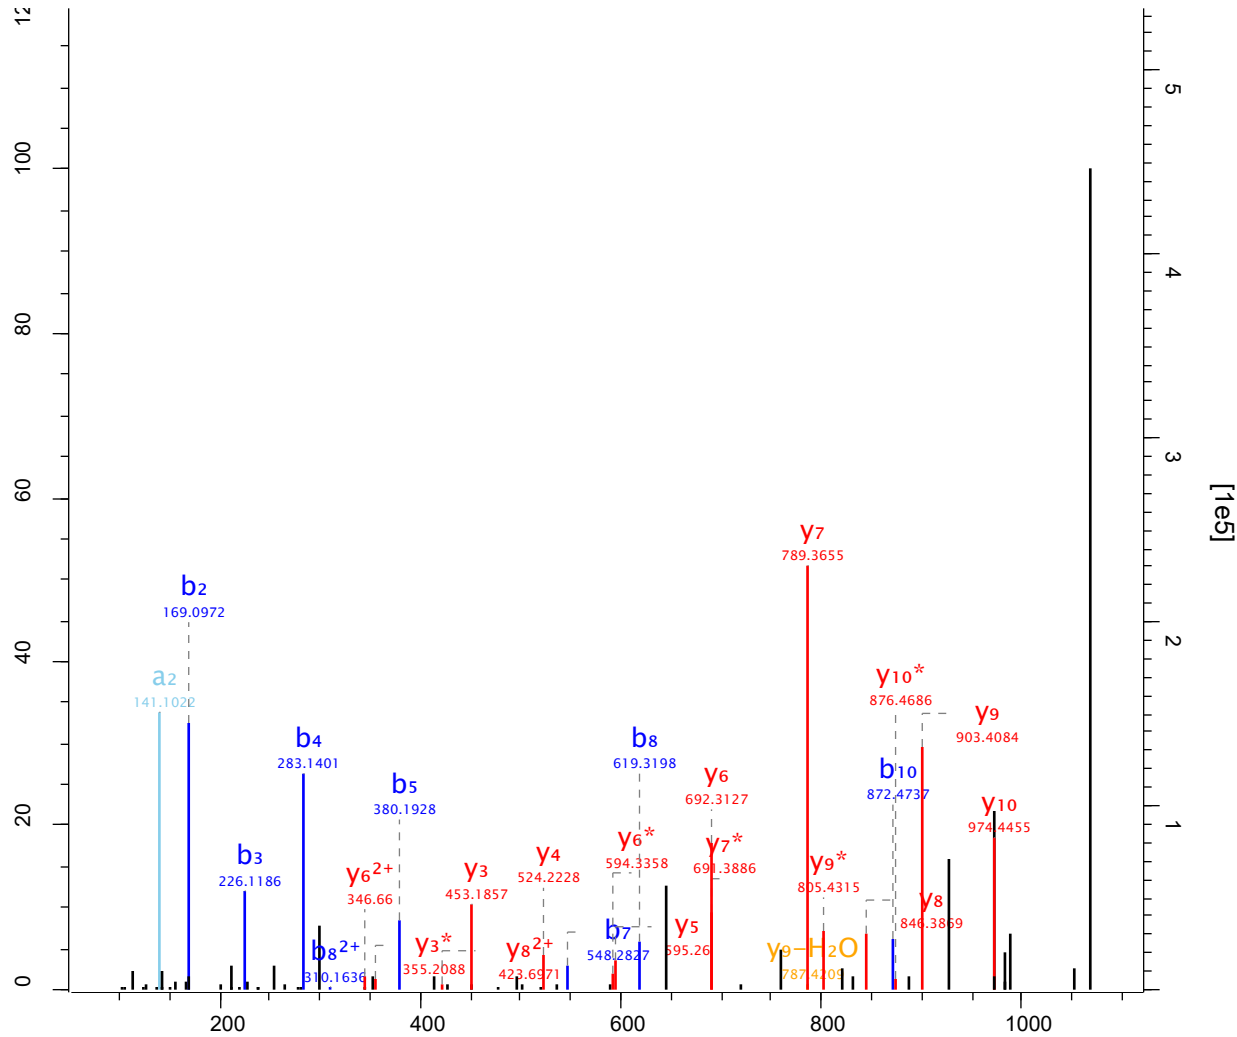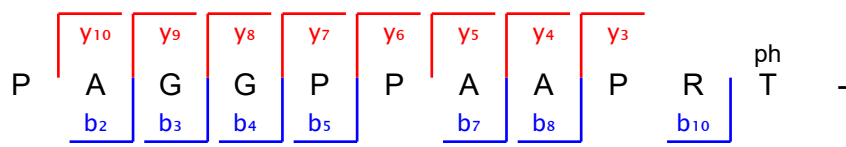



Raw file Scan Method Score m/z  
 sys\_00\_3short 4262 FTMS; HCD 48.57 742.78

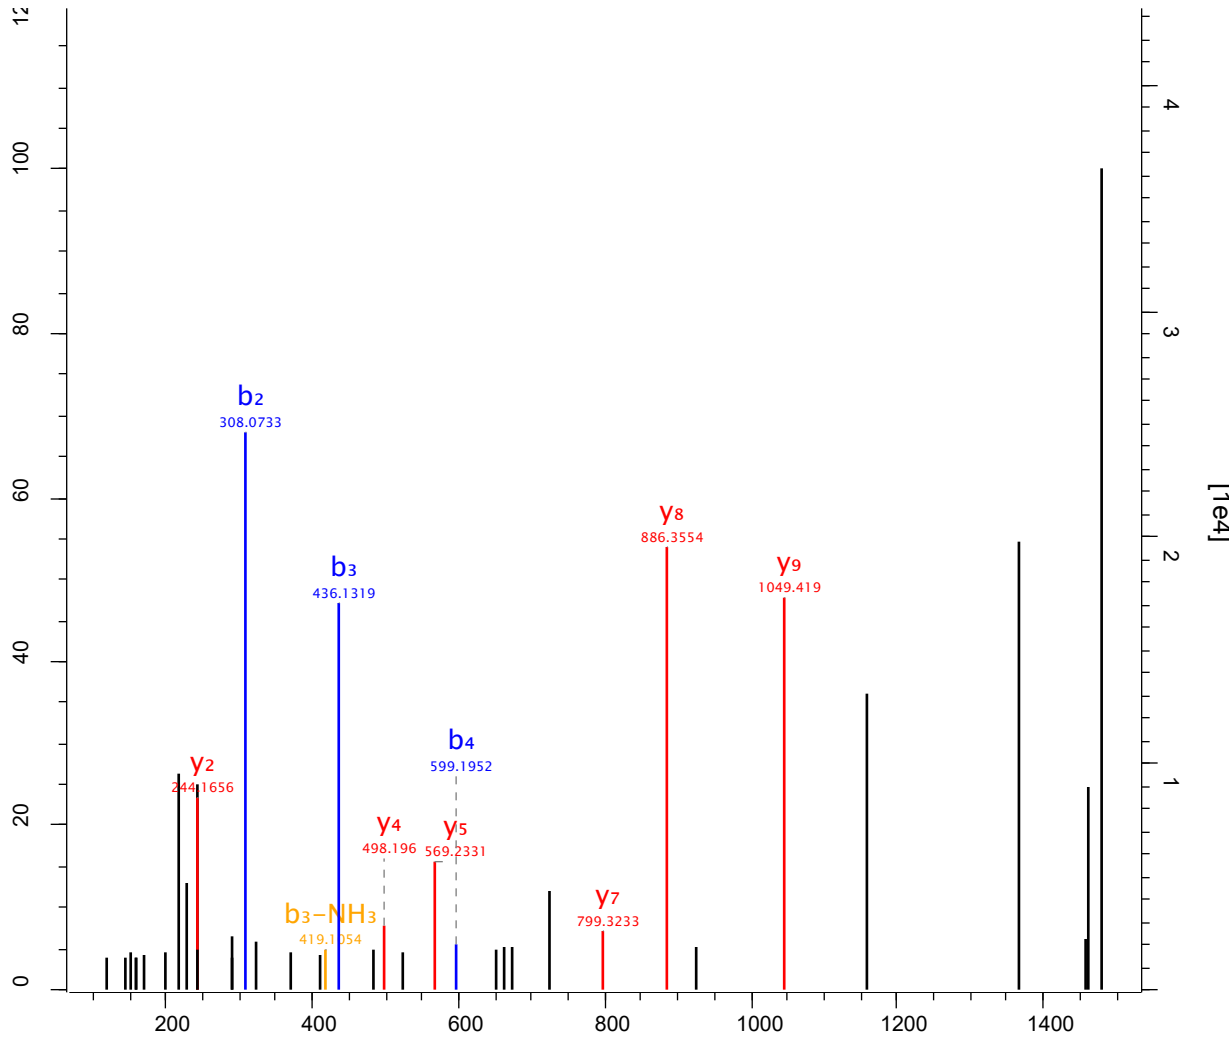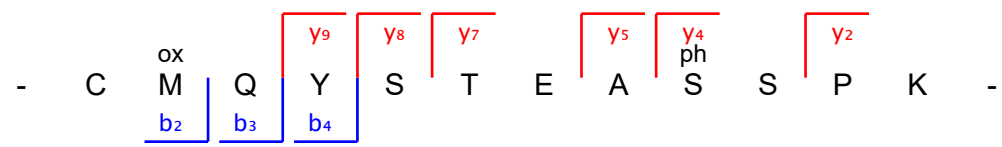

Raw file Scan Method Score m/z  
 sys\_00\_3short 4338 FTMS; HCD 60.16 614.75

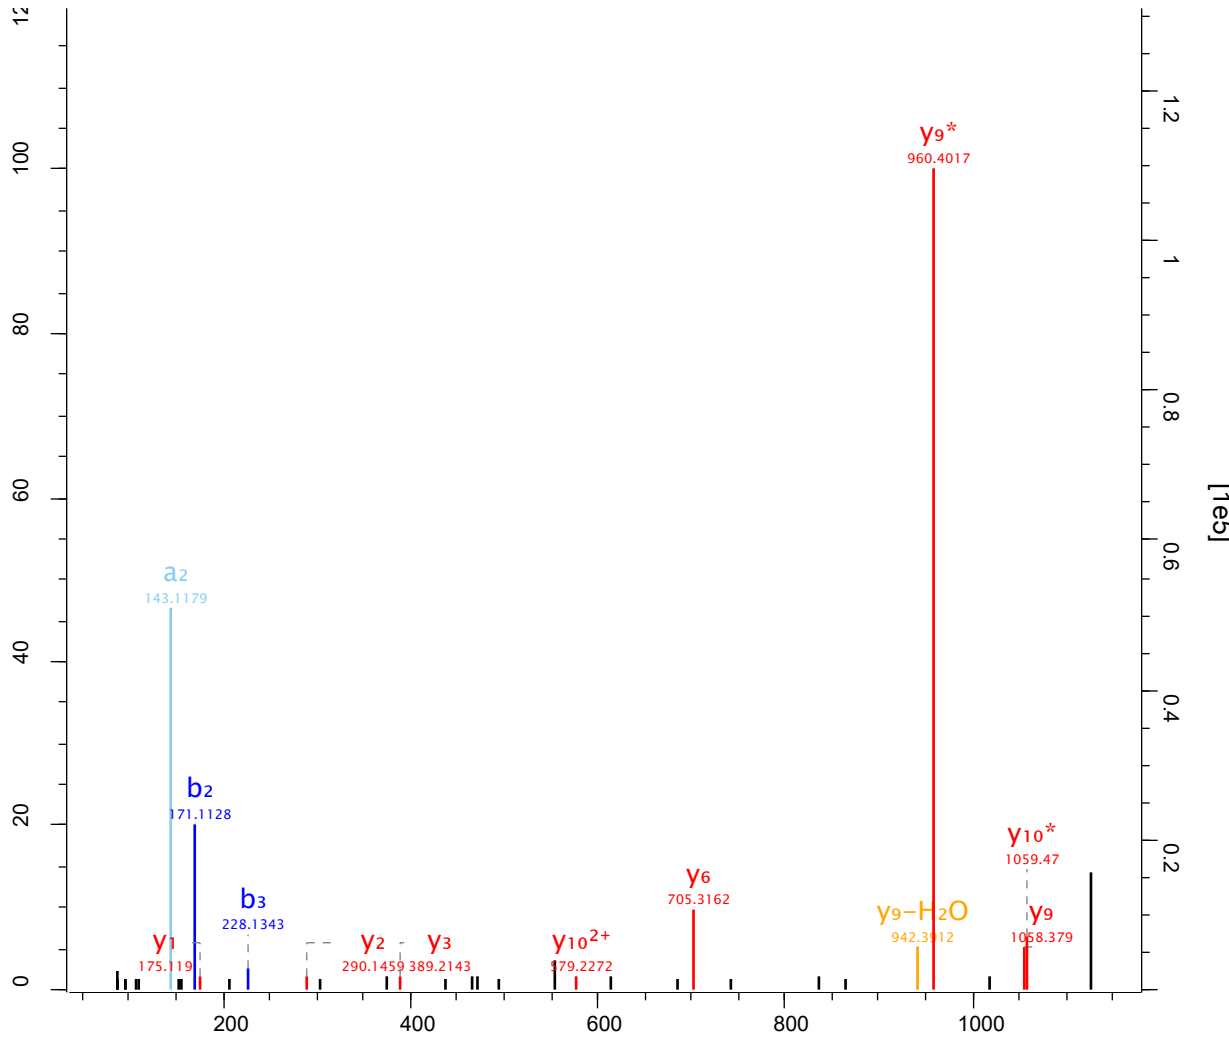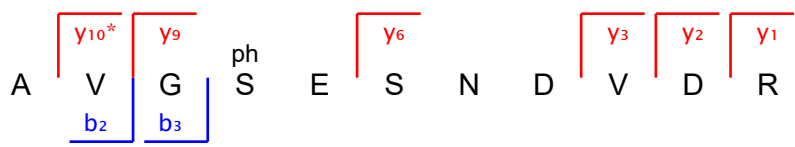

Raw file Scan Method Score m/z  
 sys\_00\_3short 4837 FTMS; HCD 234.28 665.26

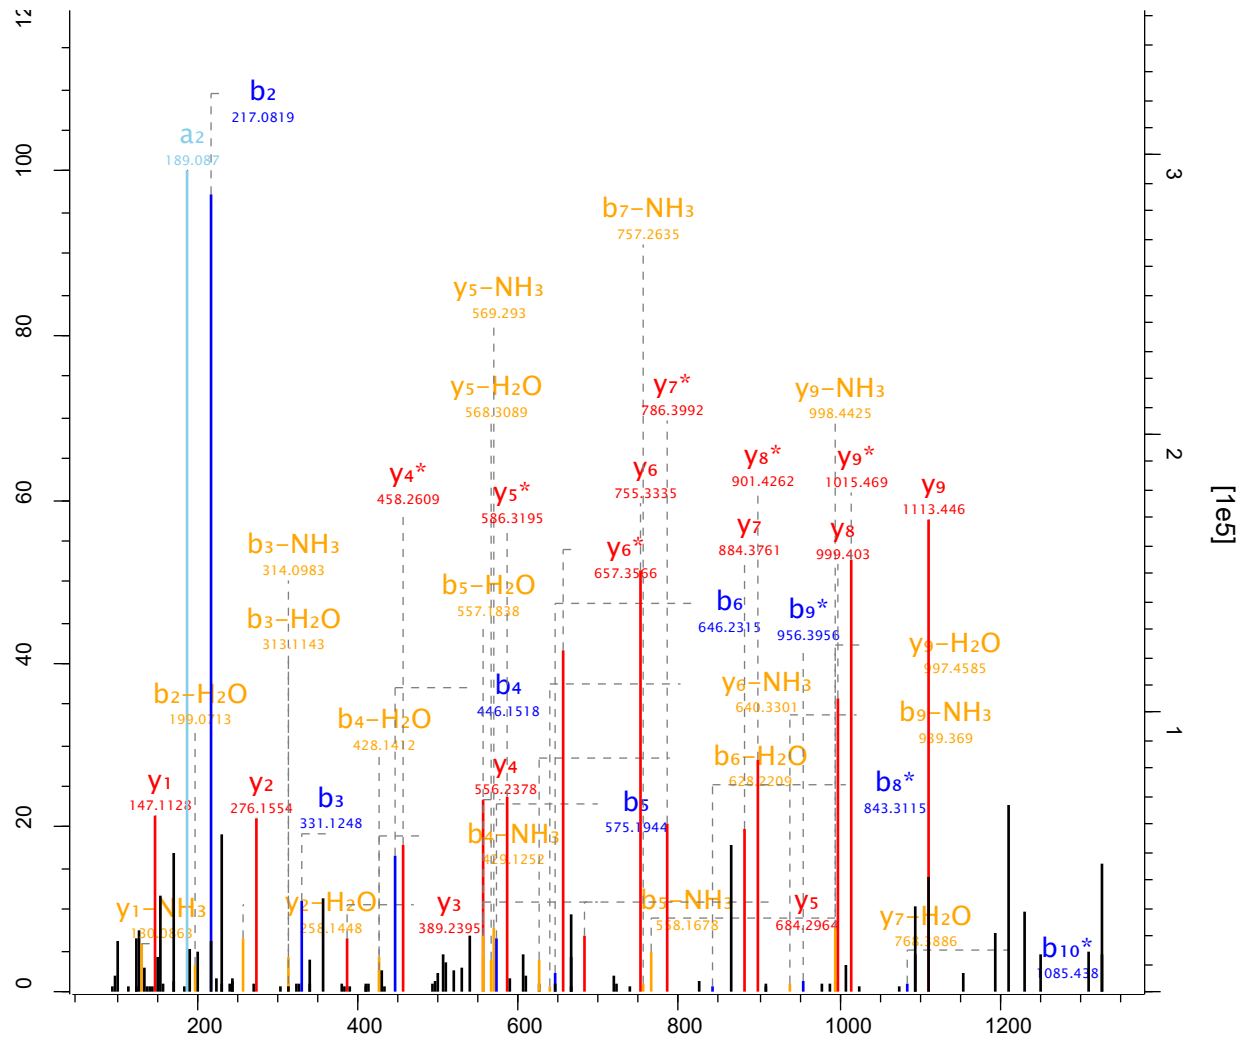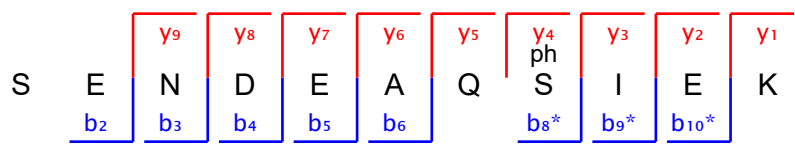

Raw file Scan Method Score m/z  
 sys\_00\_3short 4863 FTMS; HCD 83.86 492.23

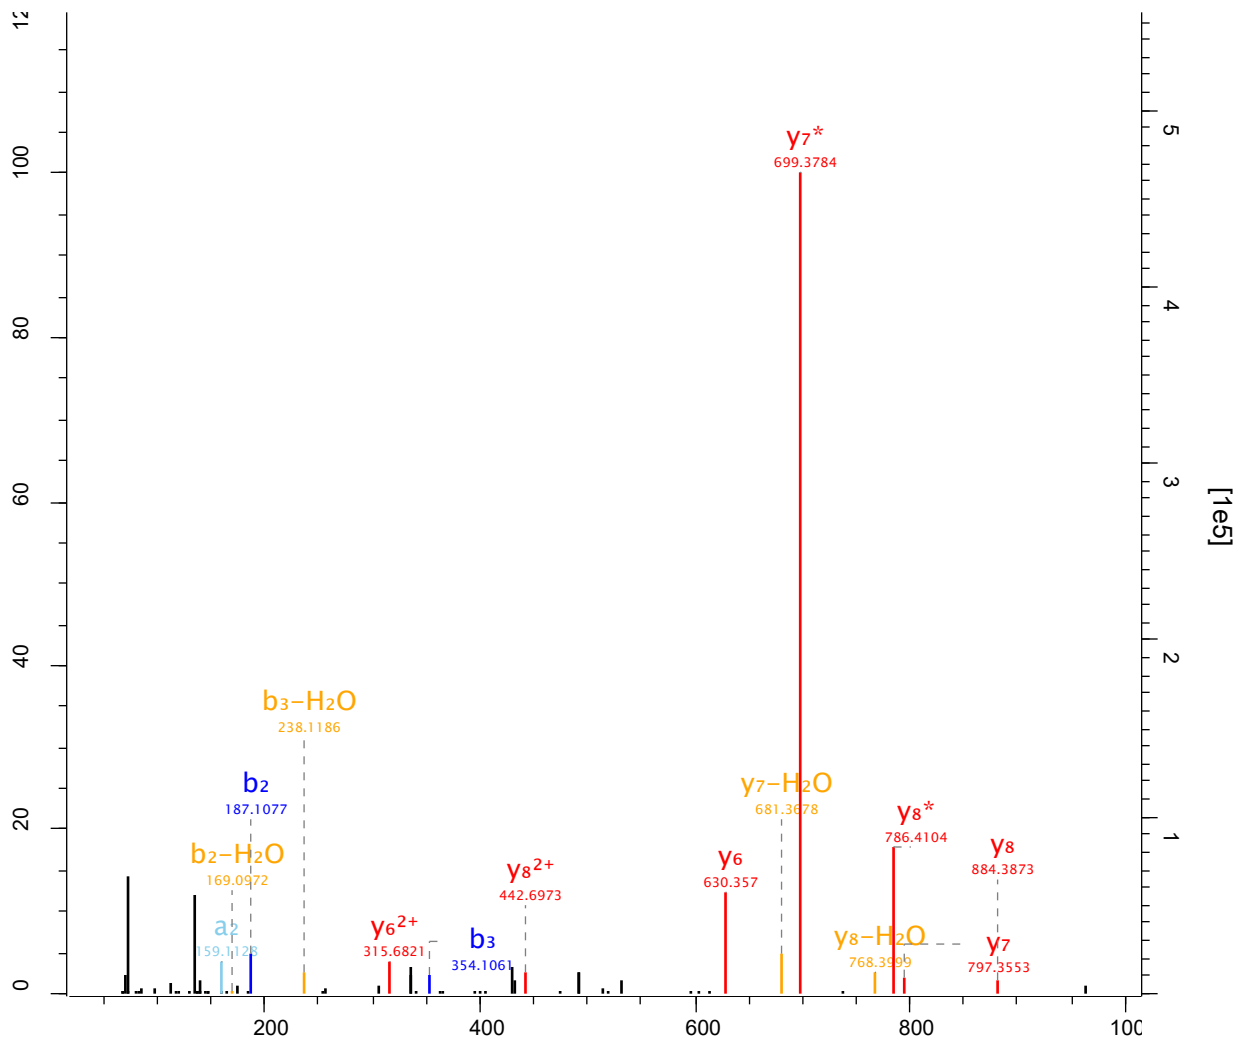

- V S ph S L G G Q Q K -  
b<sub>2</sub> b<sub>3</sub>

Raw file Scan Method Score m/z  
 sys\_00\_3short 5304 FTMS; HCD 187.51 529.23

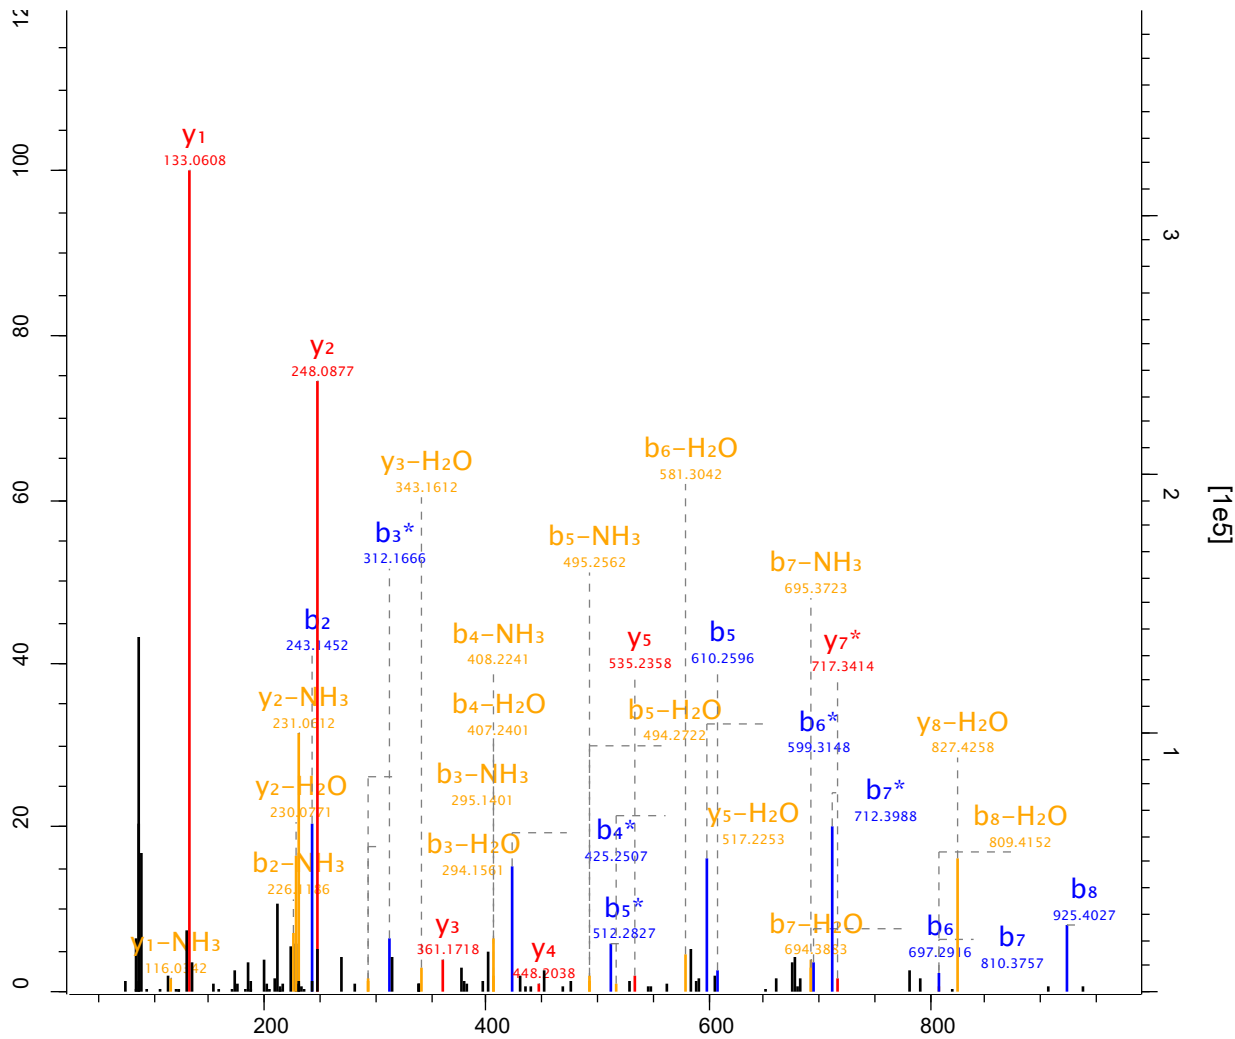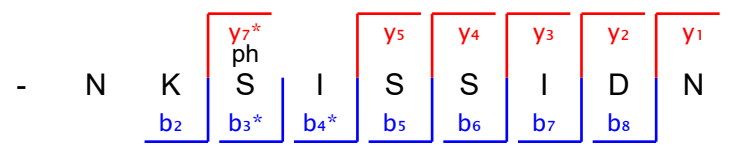

Raw file Scan Method Score m/z  
 sys\_00\_3short 5515 FTMS; HCD 113.74 437.2

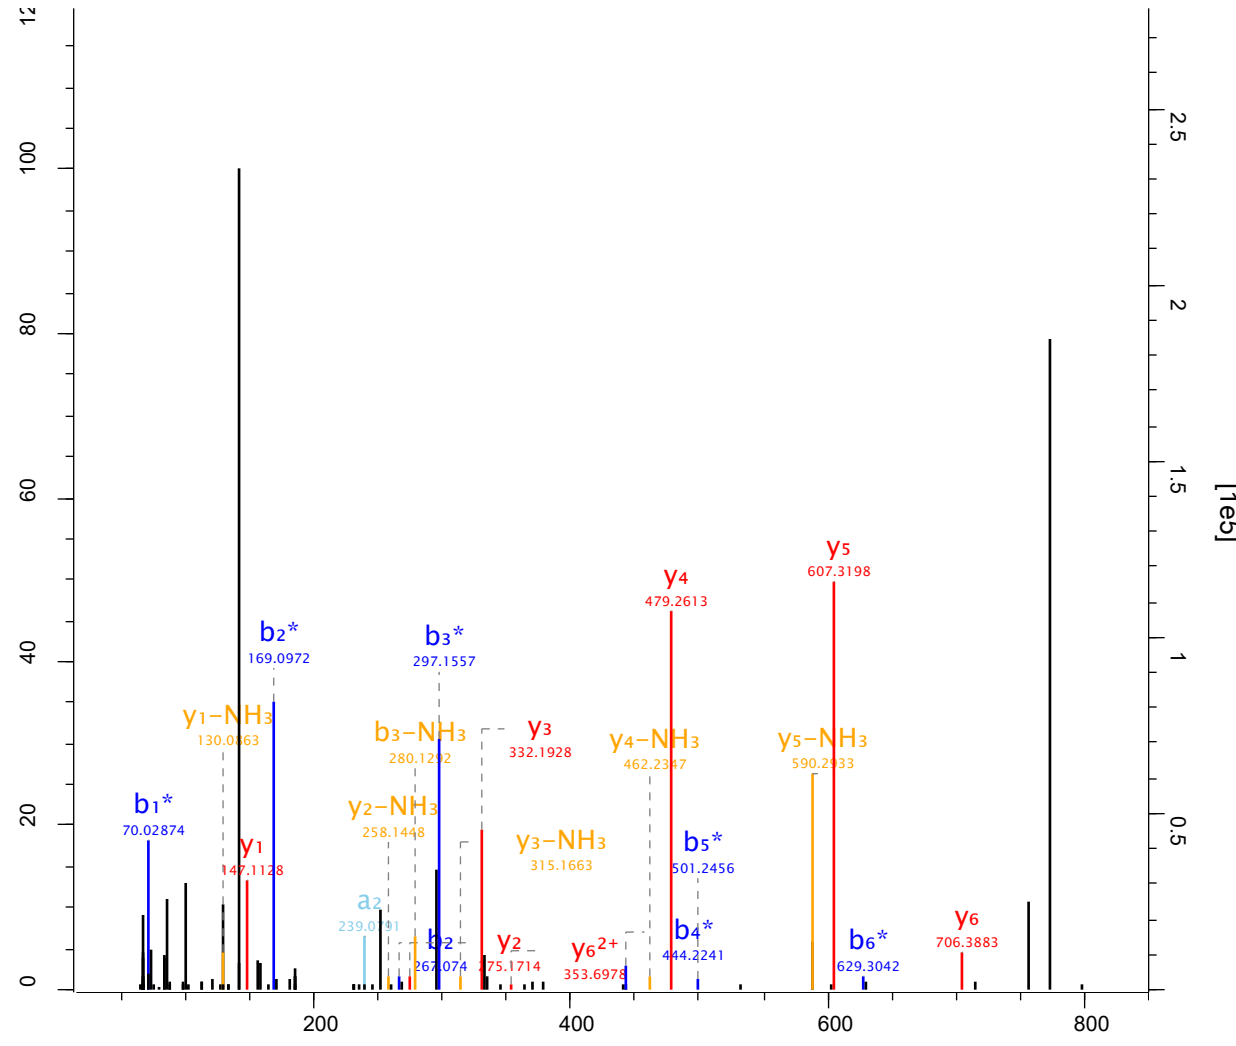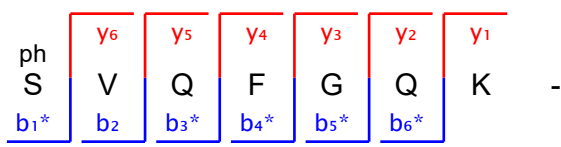

Raw file Scan Method Score m/z  
 sys\_00\_3short 5564 FTMS; HCD 119.25 620.22

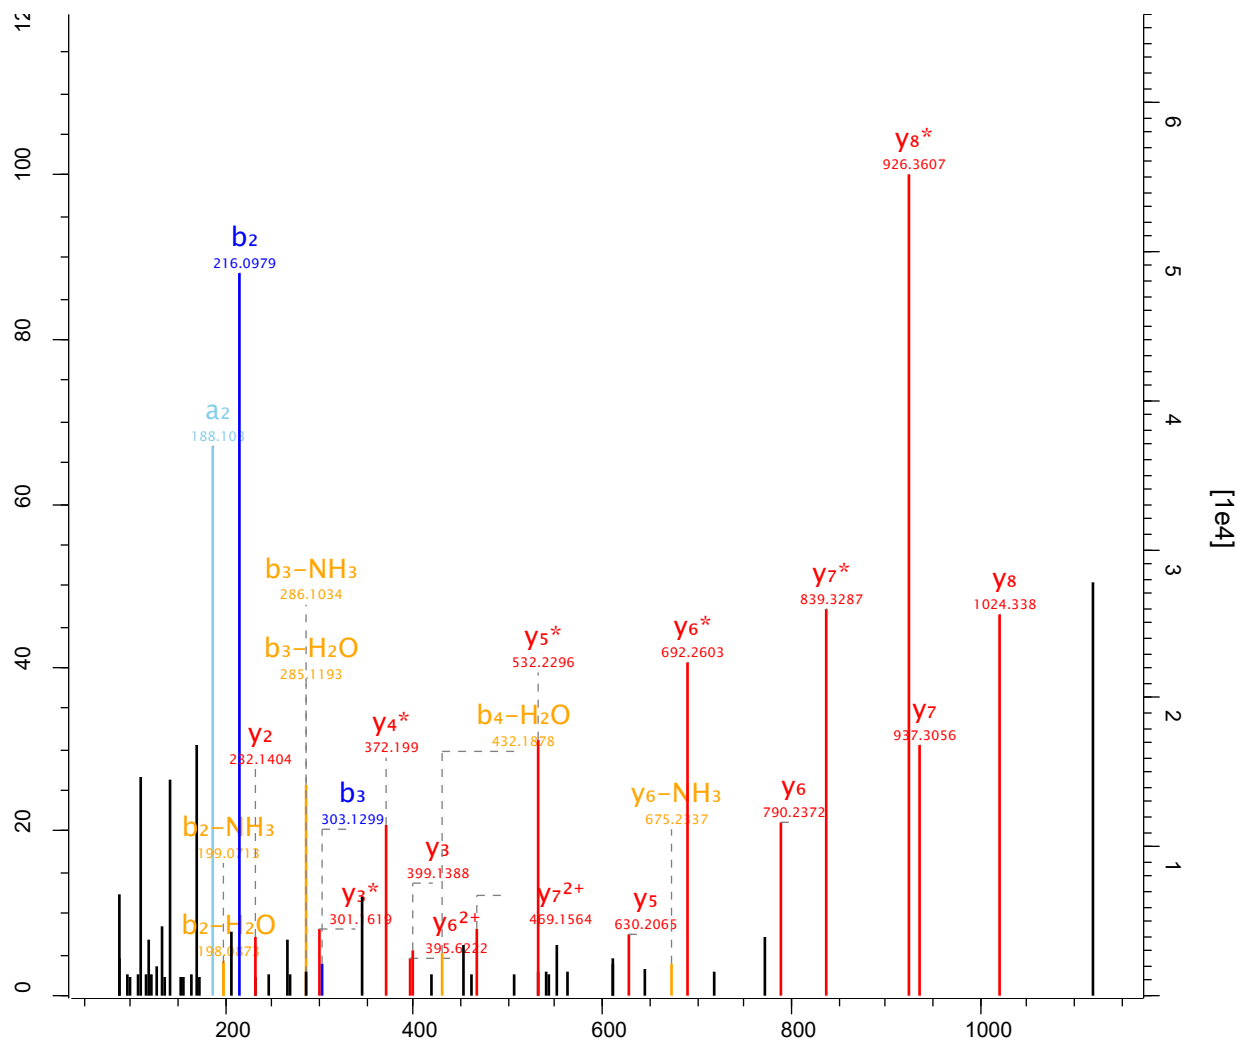

- N T S F C C A S ph G R -

Annotations below the sequence:

- Blue boxes: b<sub>2</sub> (under T), b<sub>3</sub> (under S)
- Red boxes: y<sub>8</sub> (under S), y<sub>7</sub> (under F), y<sub>6</sub> (under C), y<sub>5</sub> (under C), y<sub>4</sub>\* (under A), y<sub>3</sub> (under S), y<sub>2</sub> (under G)

Raw file Scan Method Score m/z  
 sys\_00\_3short 5781 FTMS; HCD 71.88 584.28

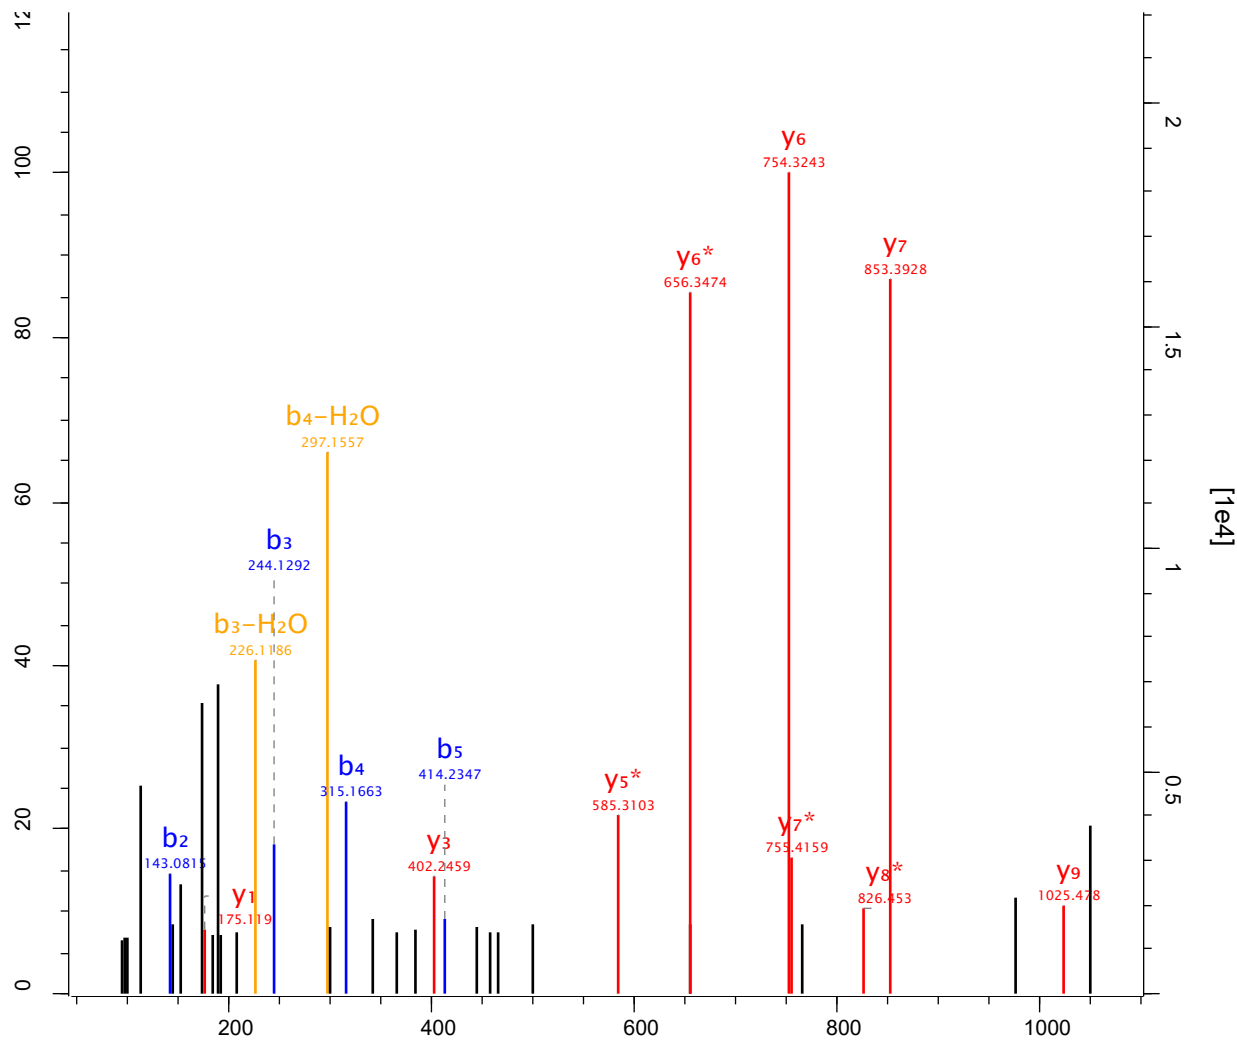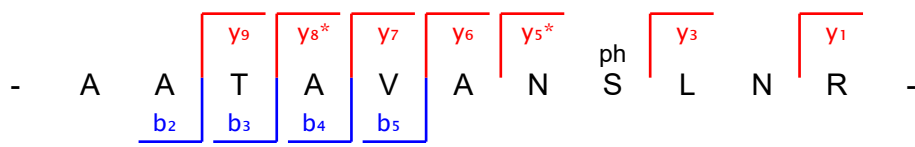



Raw file Scan Method Score m/z  
 sys\_00\_3short 5903 FTMS; HCD 64.45 805.75

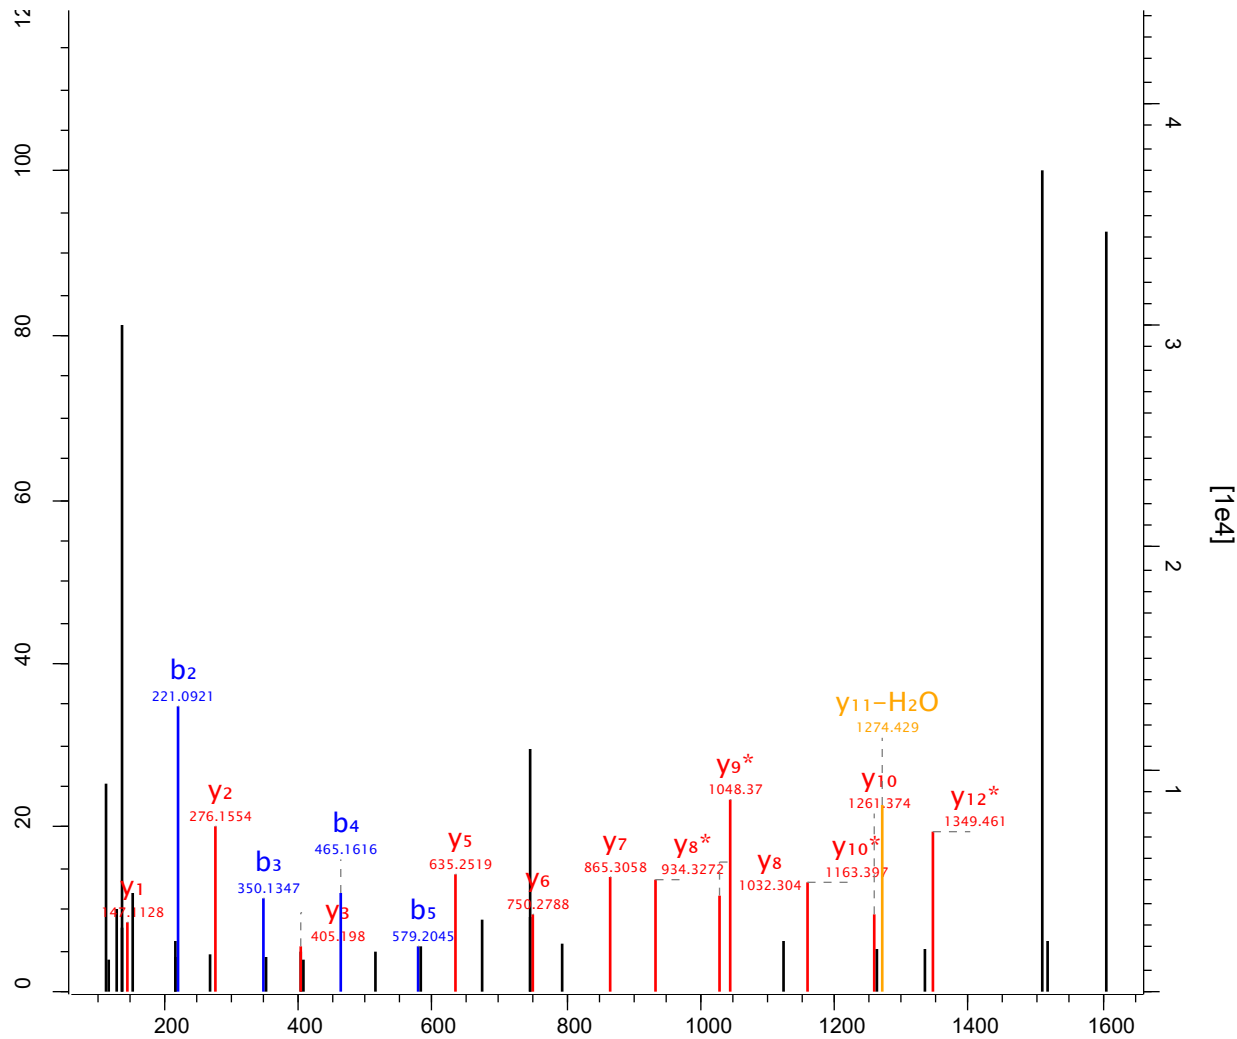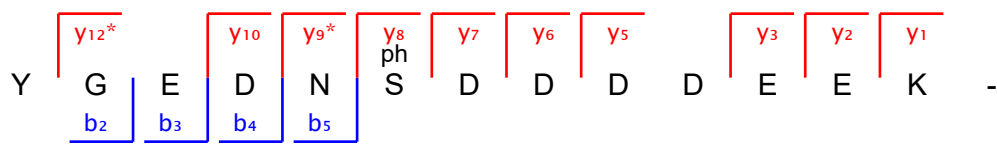

Raw file Scan Method Score m/z  
 sys\_00\_3short 6034 FTMS; HCD 130.05 851.82

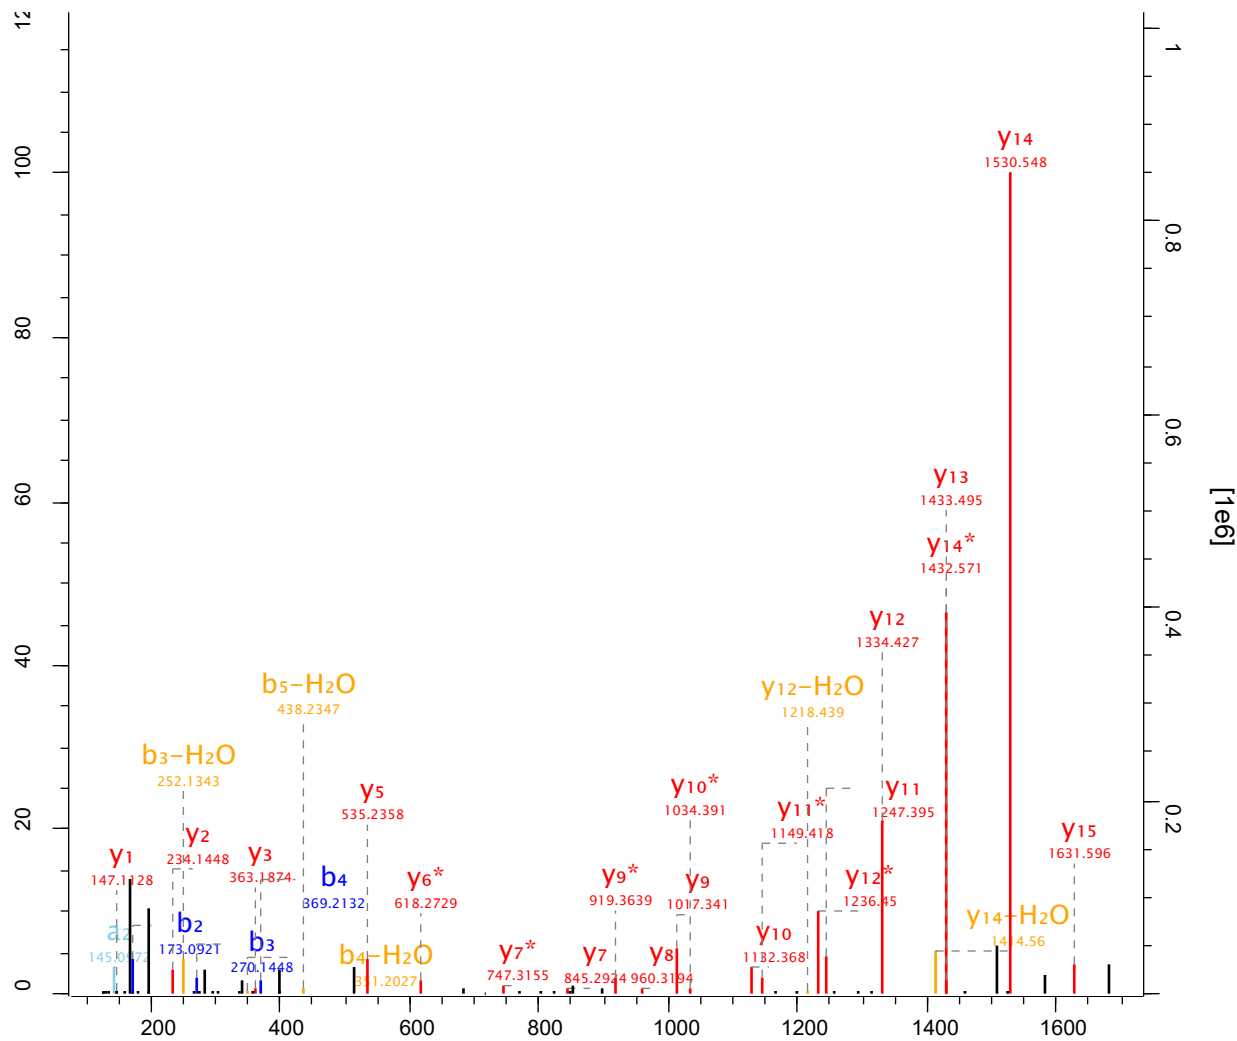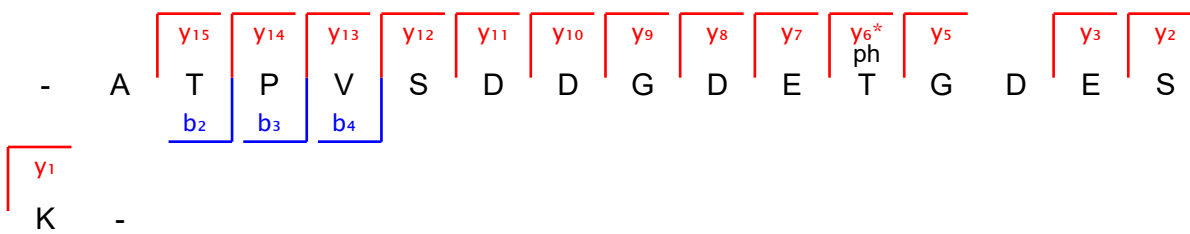

Raw file Scan Method Score m/z  
 sys\_00\_3short 6557 FTMS; HCD 66.71 619.75

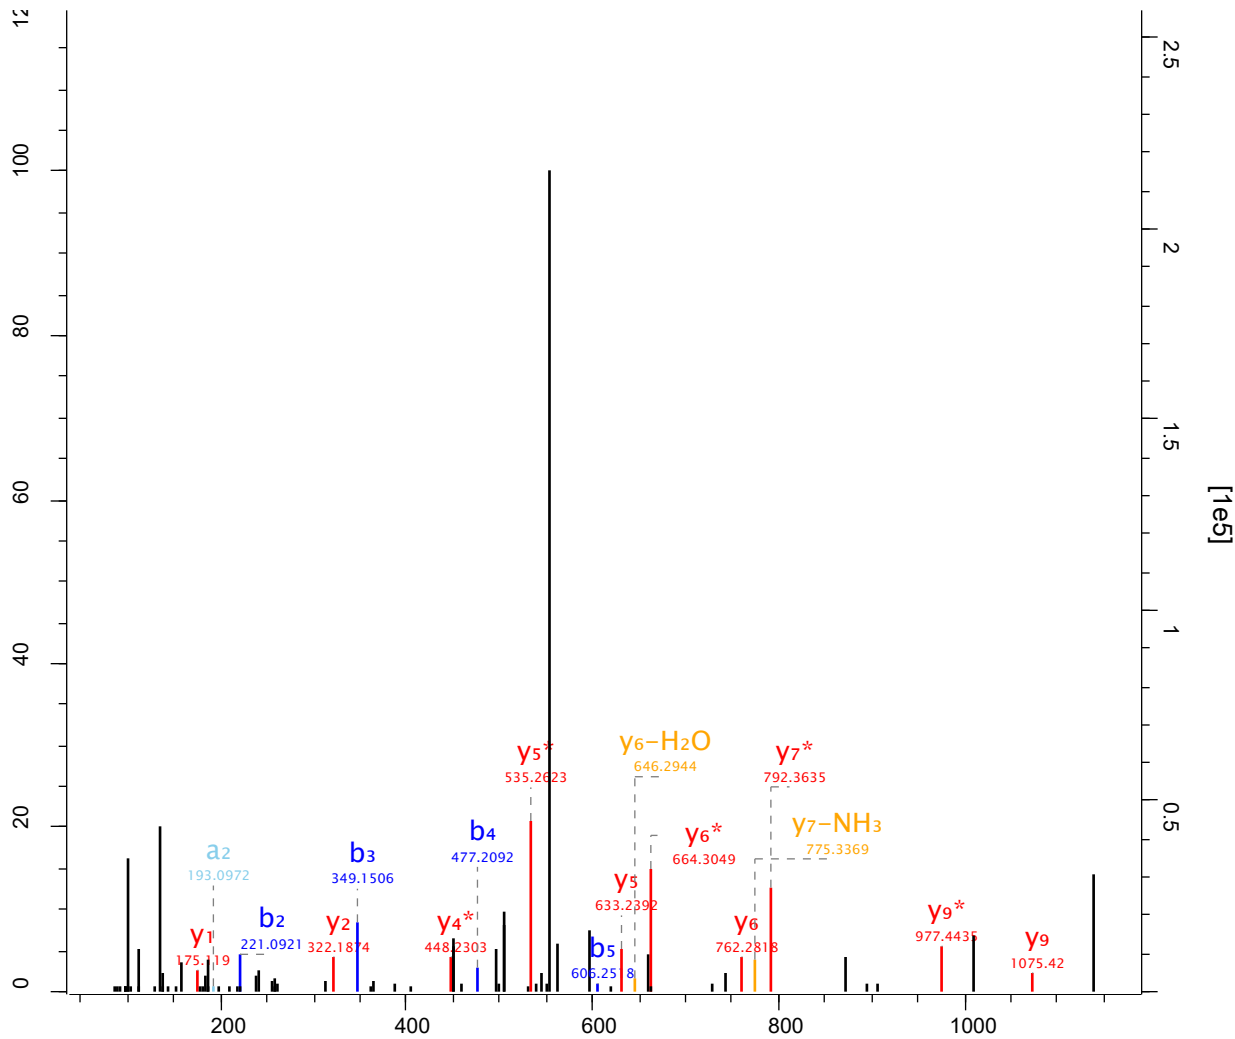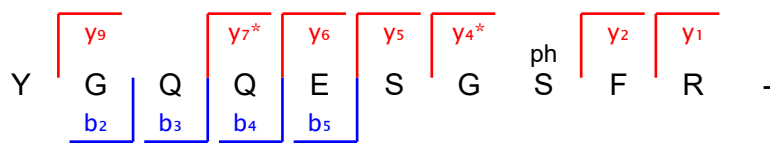

| Raw file      | Scan | Method    | Score | m/z    |
|---------------|------|-----------|-------|--------|
| sys_00_3short | 6563 | FTMS; HCD | 57.17 | 473.71 |

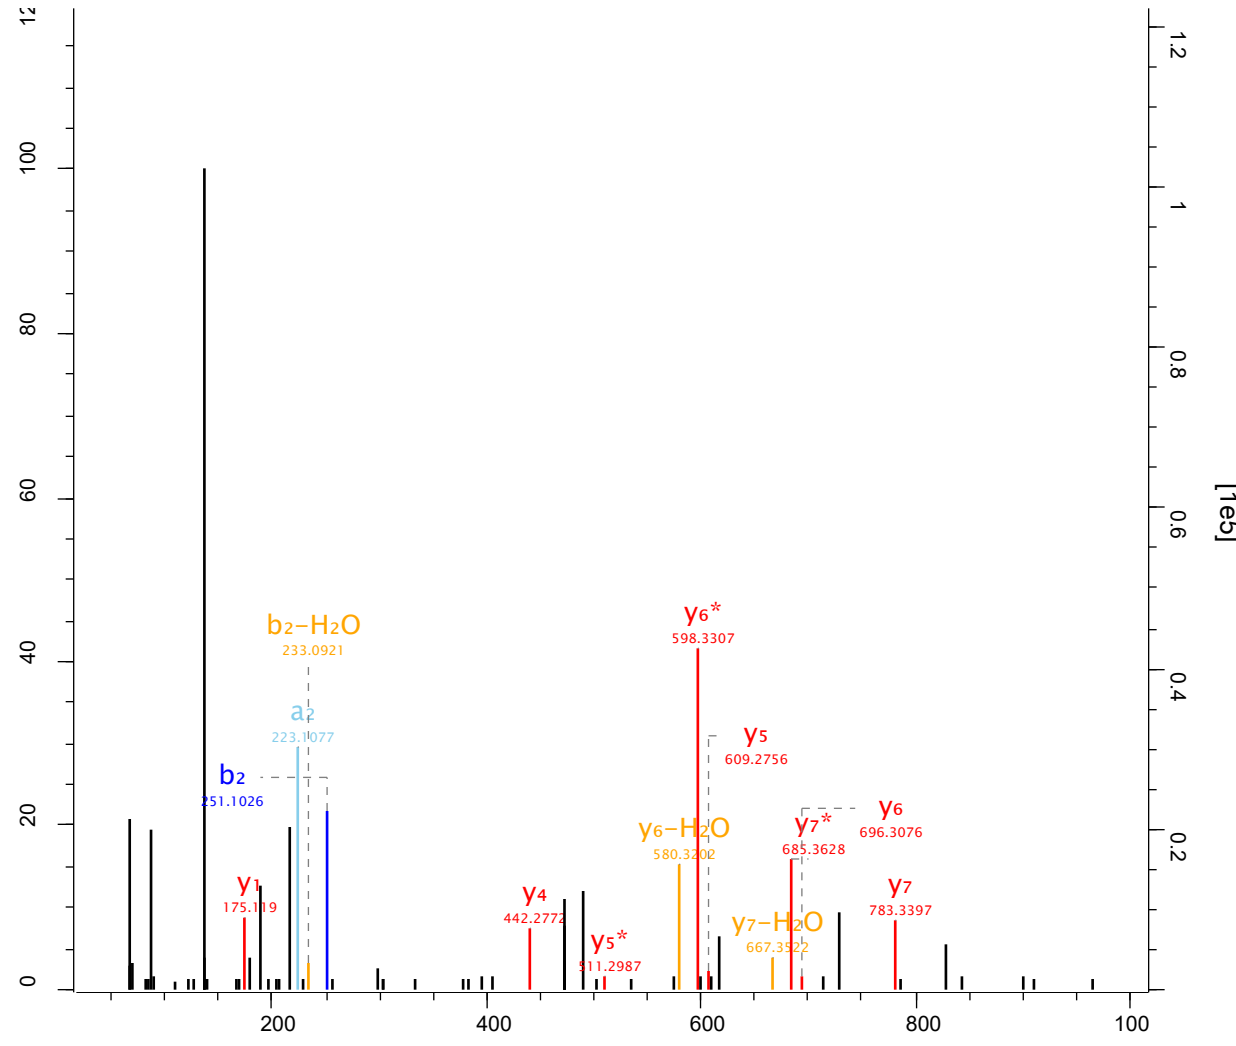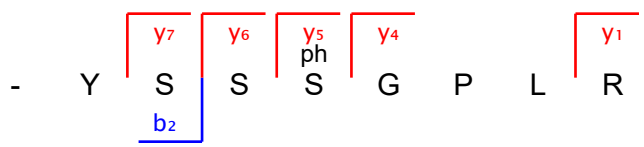

Raw file Scan Method Score m/z  
 sys\_00\_3short 6651 FTMS; HCD 98.17 540.76

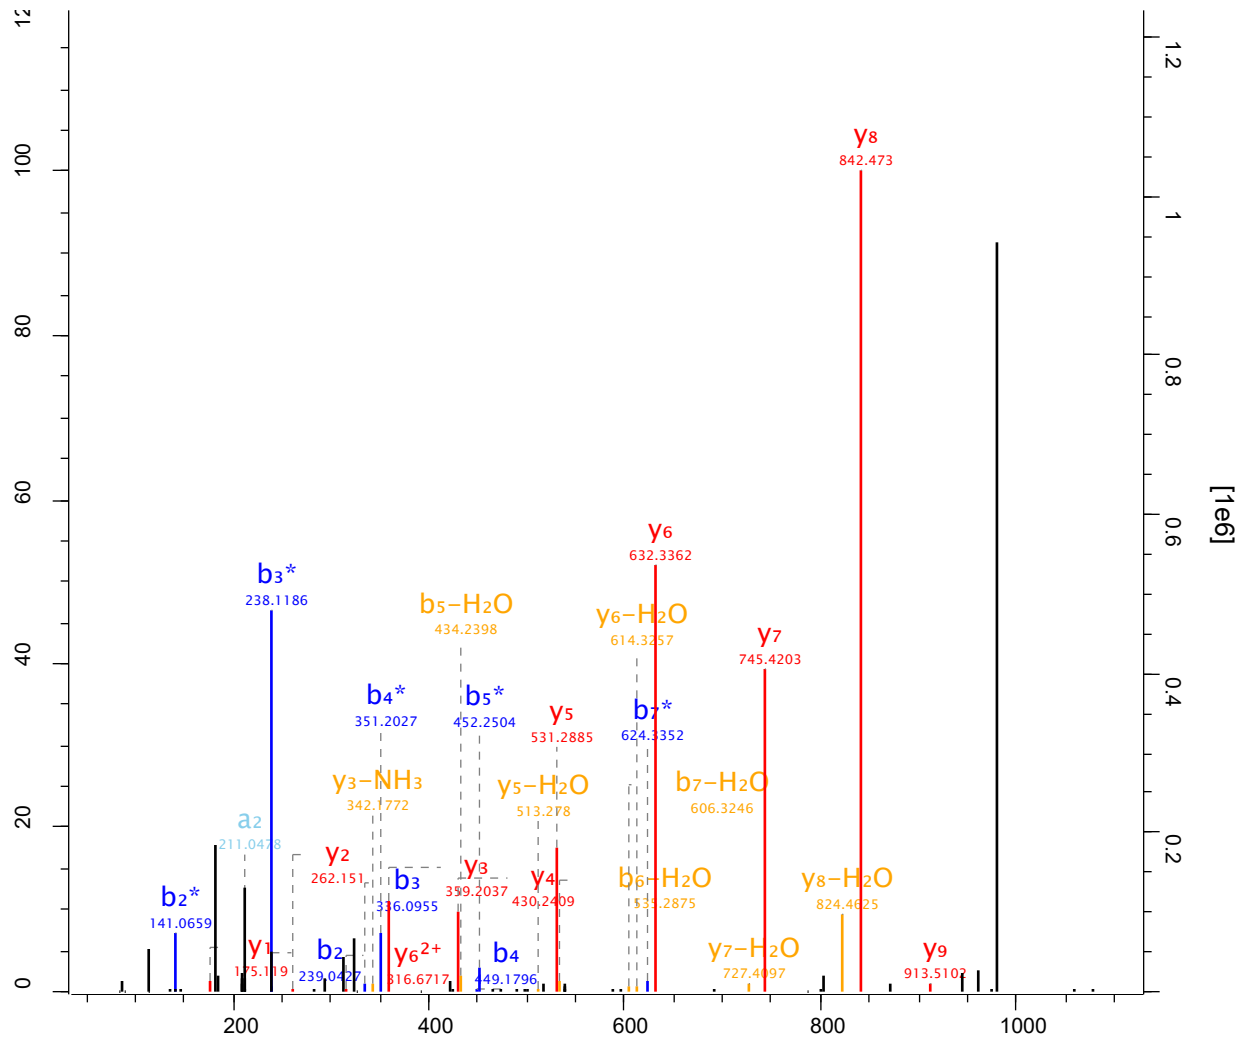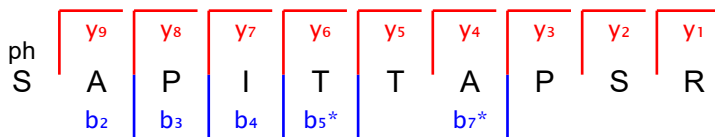

Raw file Scan Method Score m/z  
 sys\_00\_3short 6827 FTMS; HCD 113.99 510.75

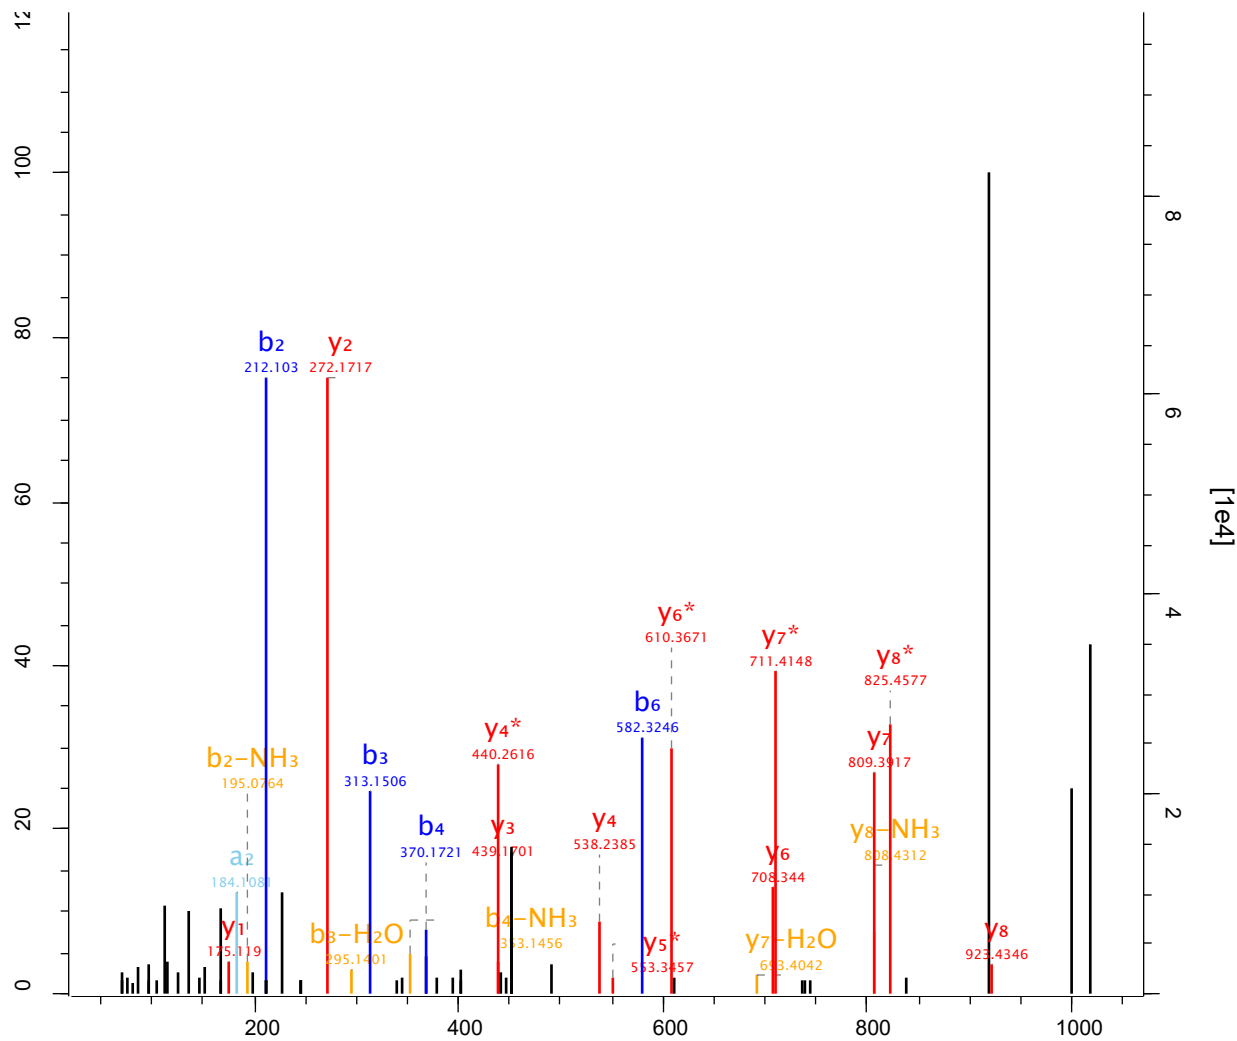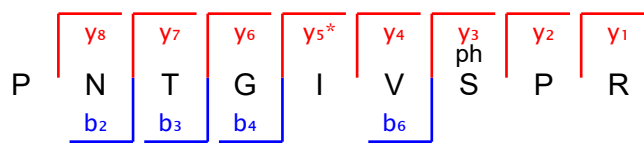

Raw file Scan Method Score m/z  
 sys\_00\_3short 6940 FTMS; HCD 146.59 634.28

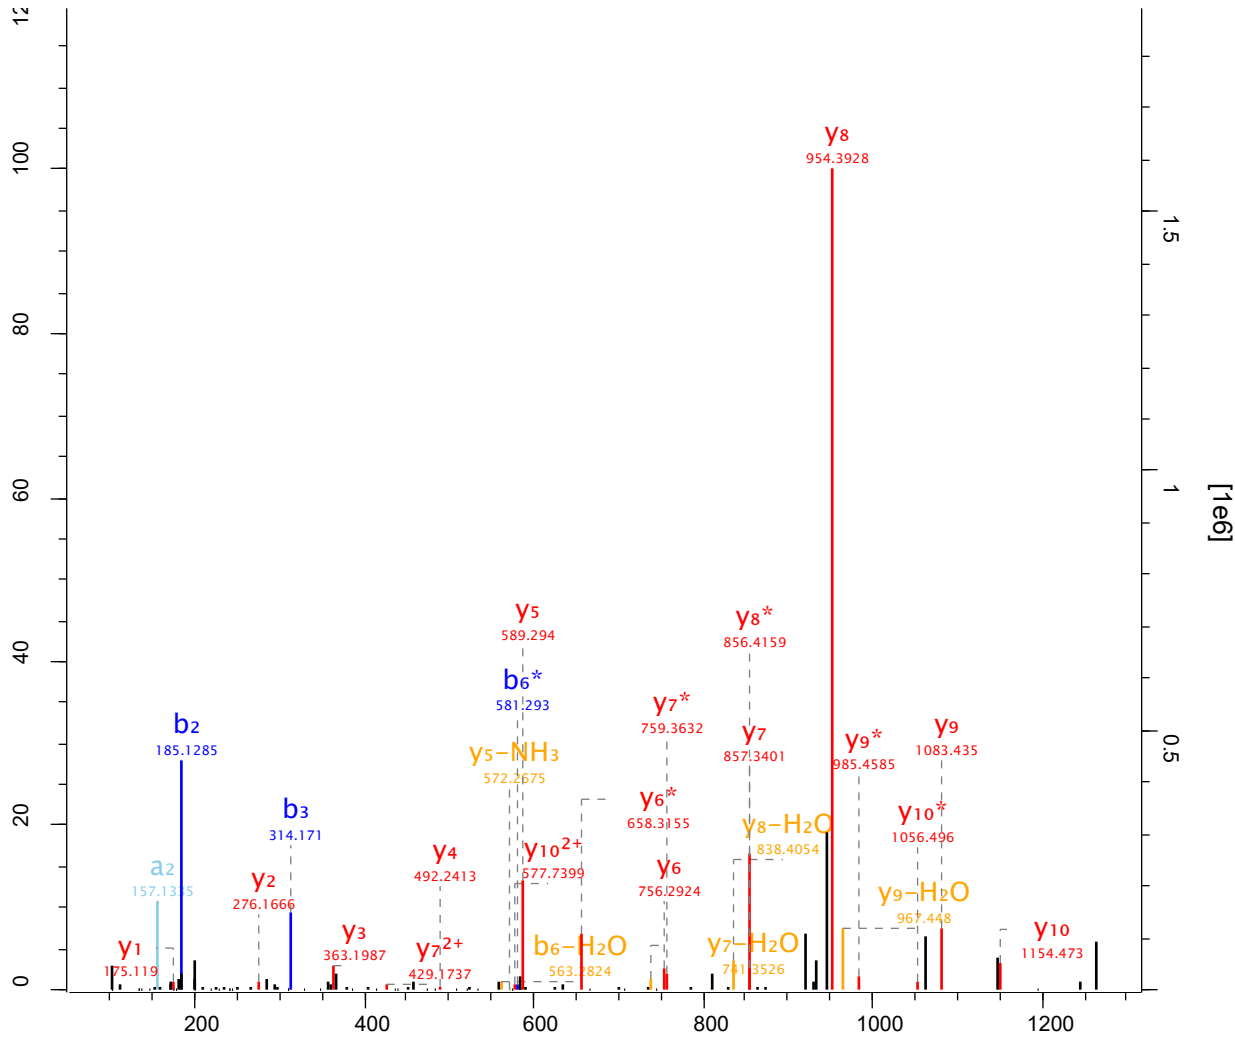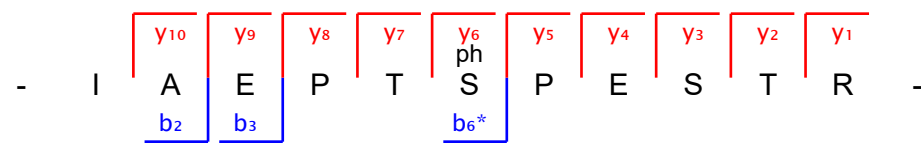

Raw file Scan Method Score m/z  
 sys\_00\_3short 7401 FTMS; HCD 54.9 737.29

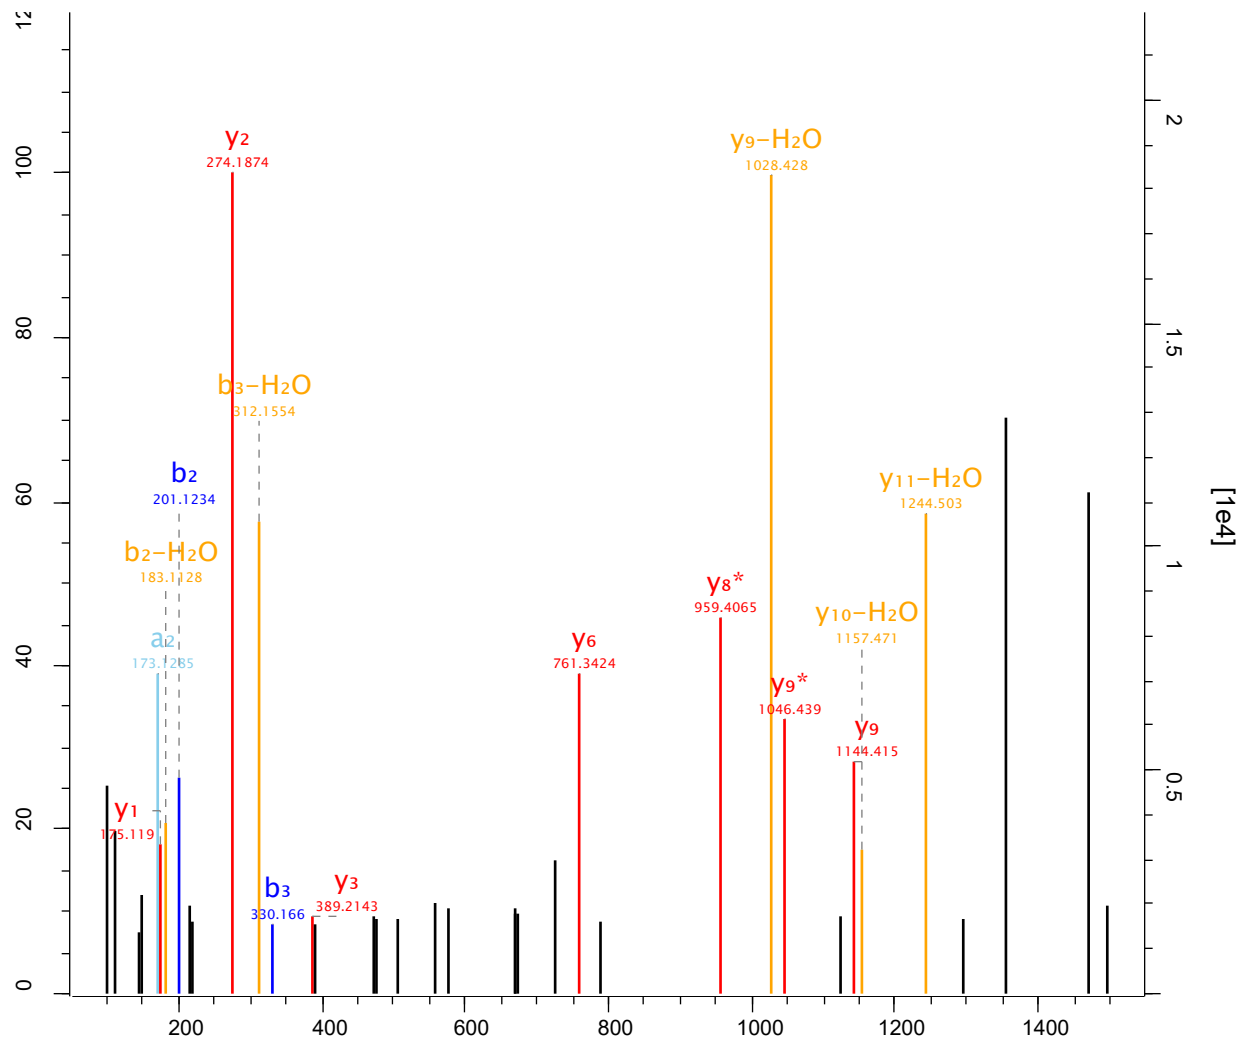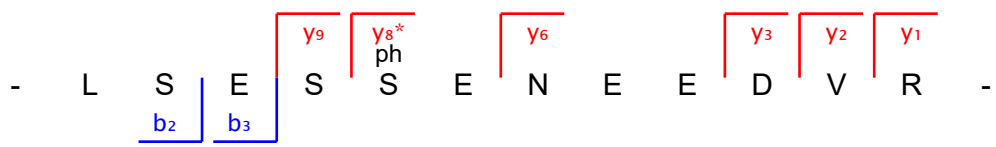



Raw file Scan Method Score m/z  
 sys\_00\_3short 7417 FTMS; HCD 252.66 694.3

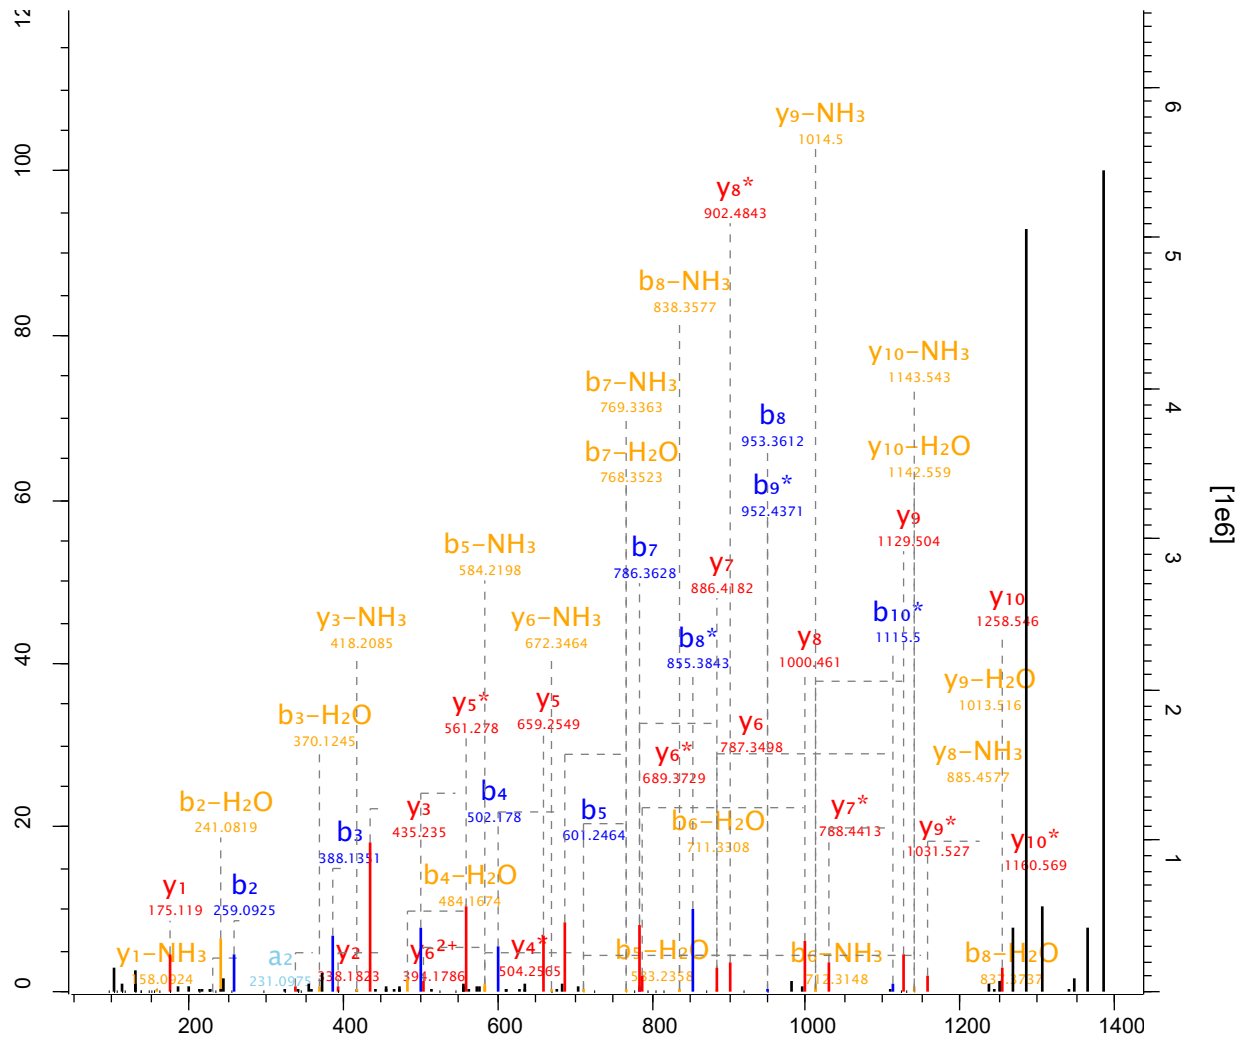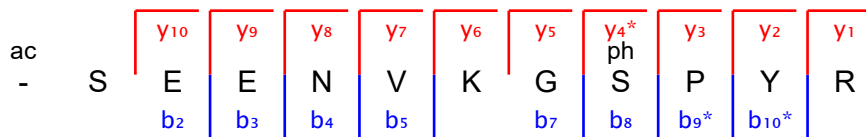

Raw file Scan Method Score m/z  
 sys\_00\_3short 7649 FTMS; HCD 248.75 680.29

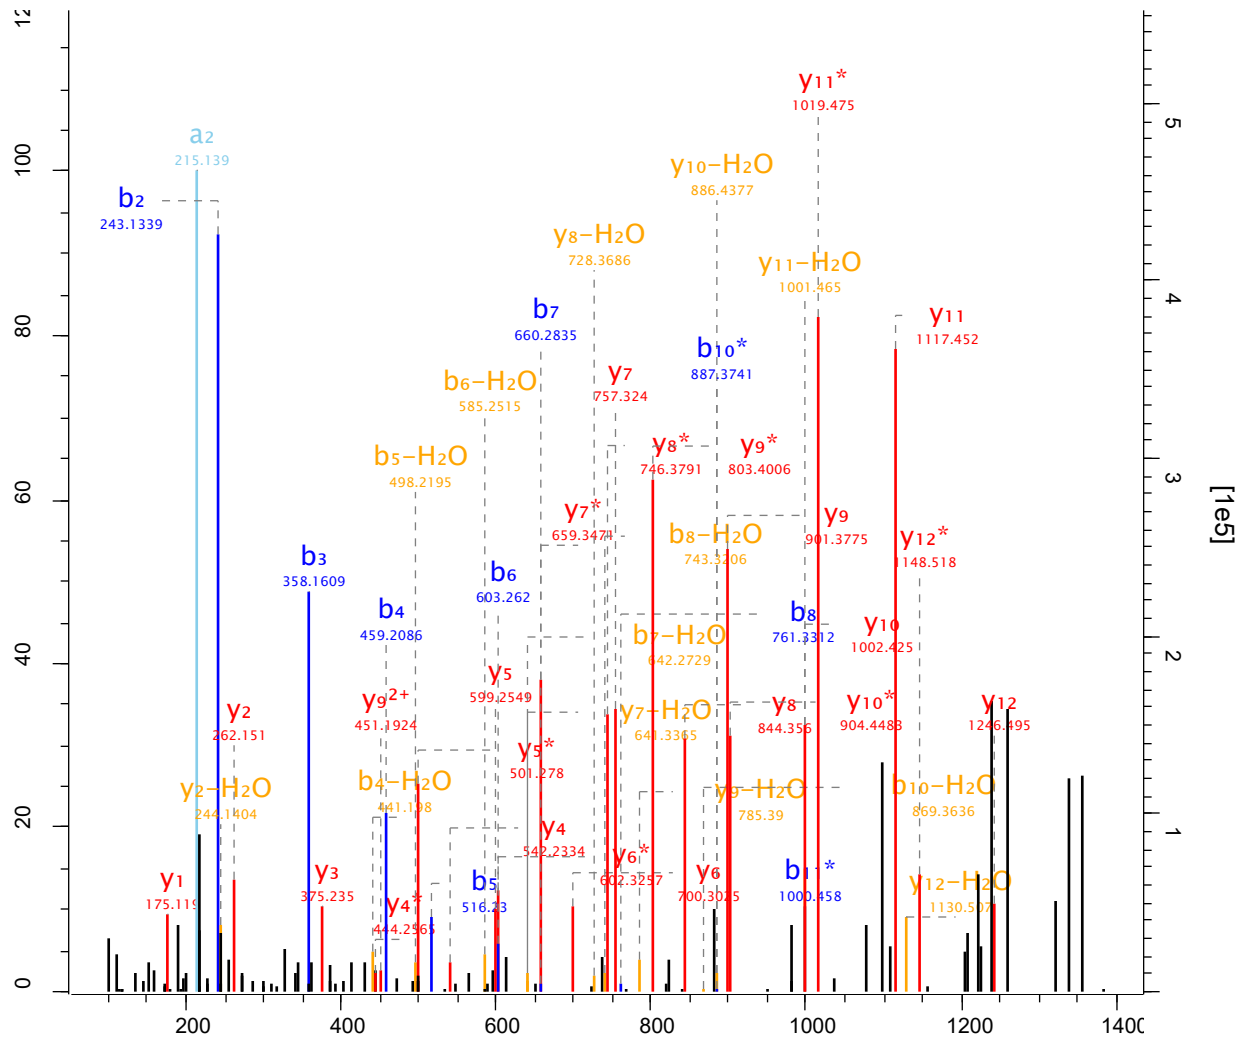

- L E D T G S G T G ph S L S R -

b<sub>2</sub>
b<sub>3</sub>
b<sub>4</sub>
b<sub>5</sub>
b<sub>6</sub>
b<sub>7</sub>
b<sub>8</sub>
b<sub>10</sub><sup>\*</sup>
b<sub>11</sub><sup>\*</sup>

Raw file Scan Method Score m/z  
 sys\_00\_3short 7859 FTMS; HCD 152.04 474.2

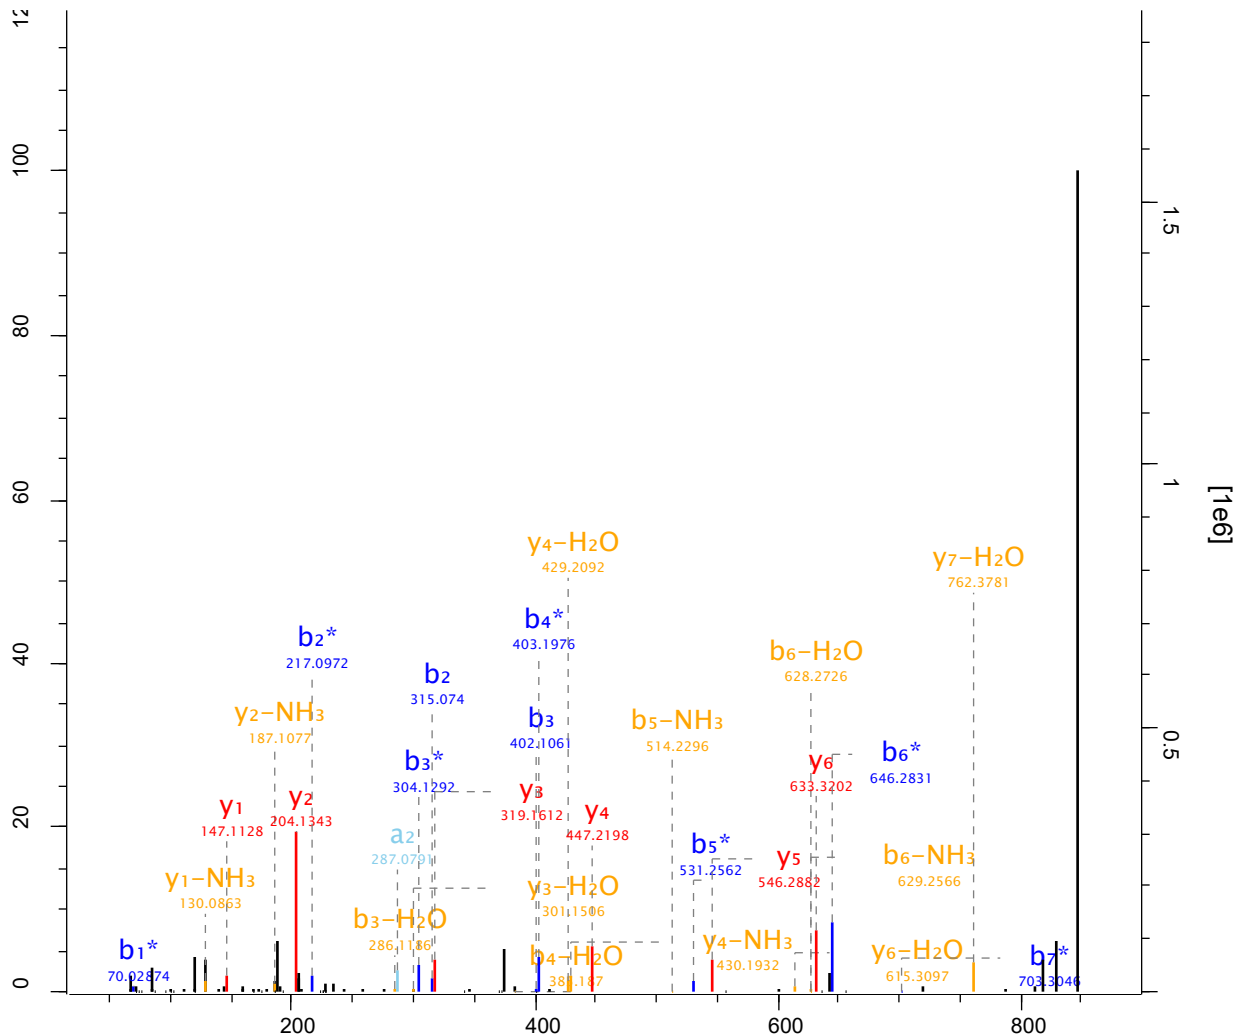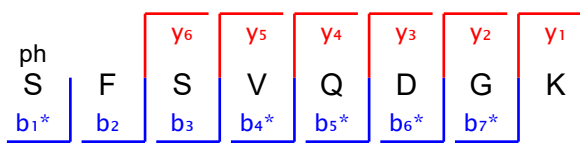

Raw file Scan Method Score m/z  
 sys\_00\_3short 7980 FTMS; HCD 99.14 410.21

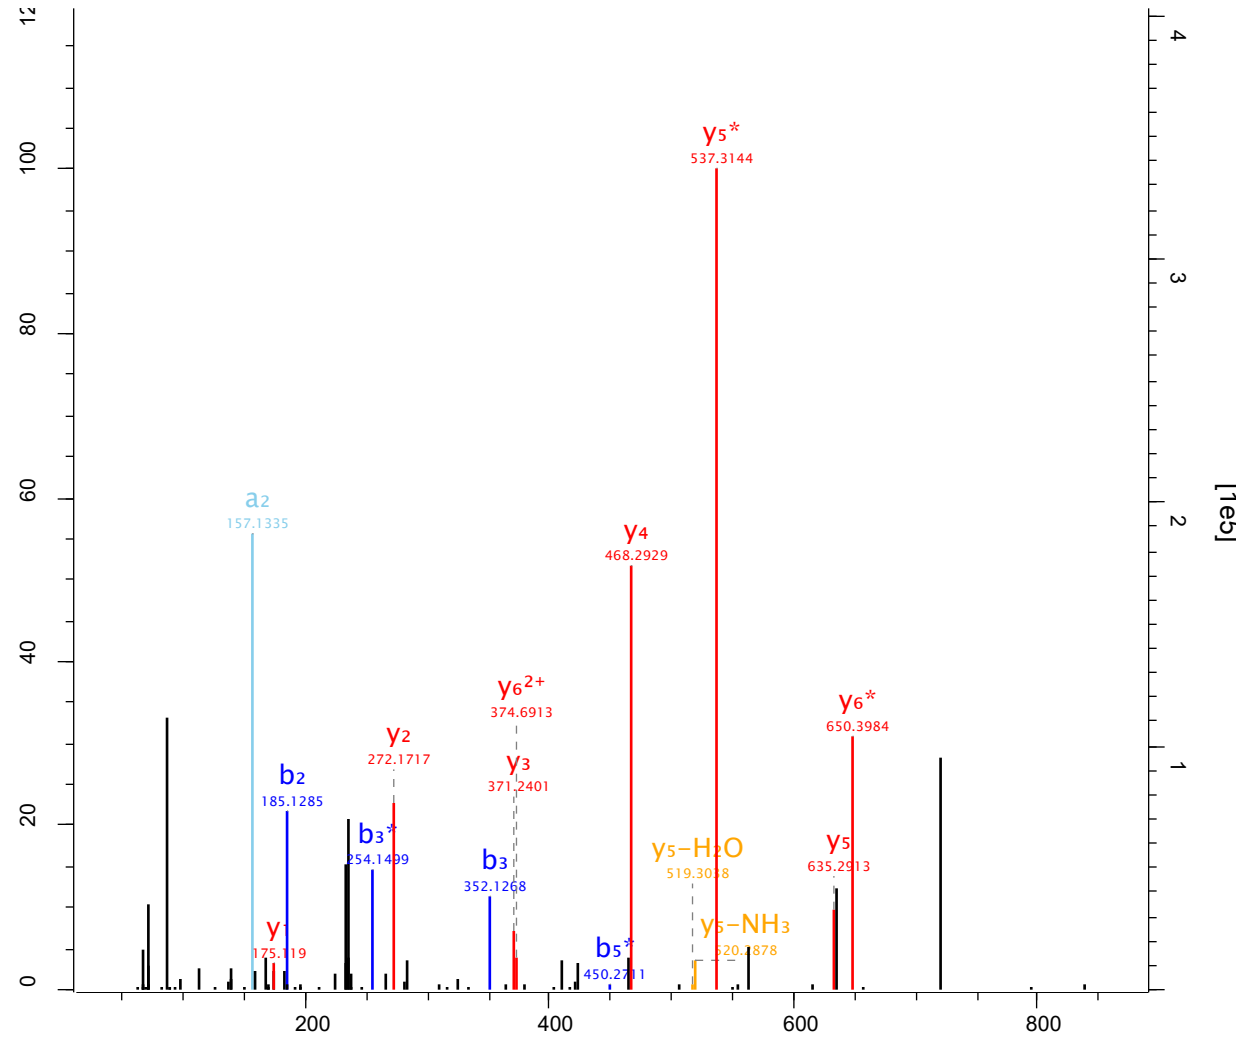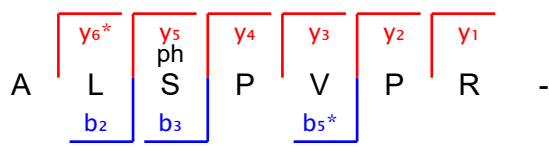

Raw file Scan Method Score m/z  
 sys\_00\_3short 8115 FTMS; HCD 79.66 477.71

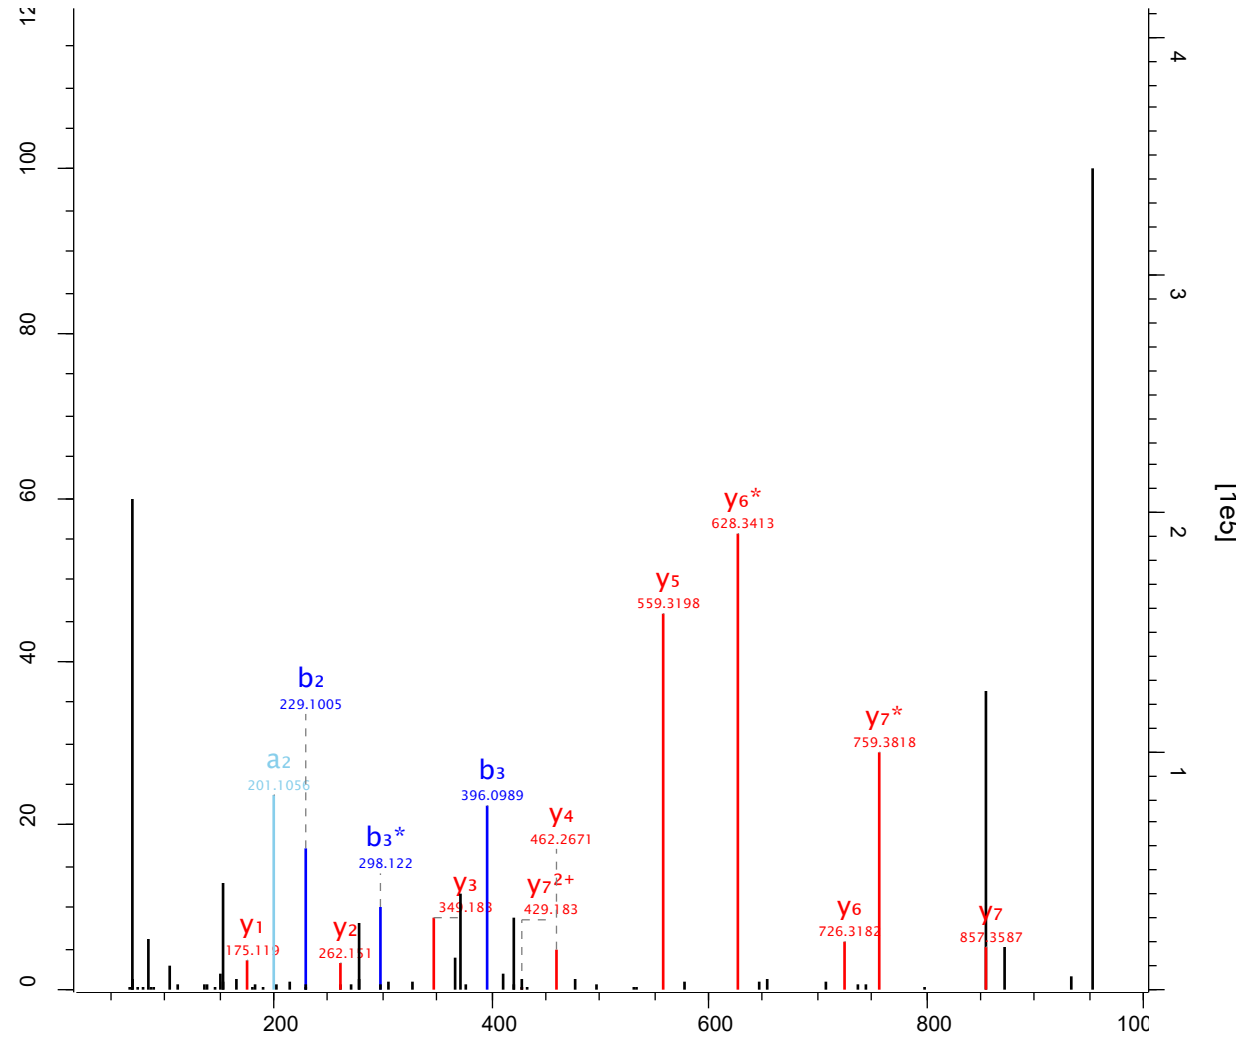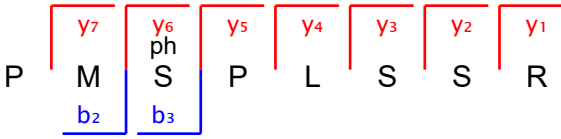

Raw file Scan Method Score m/z  
 sys\_00\_3short 8275 FTMS; HCD 79.09 616.79

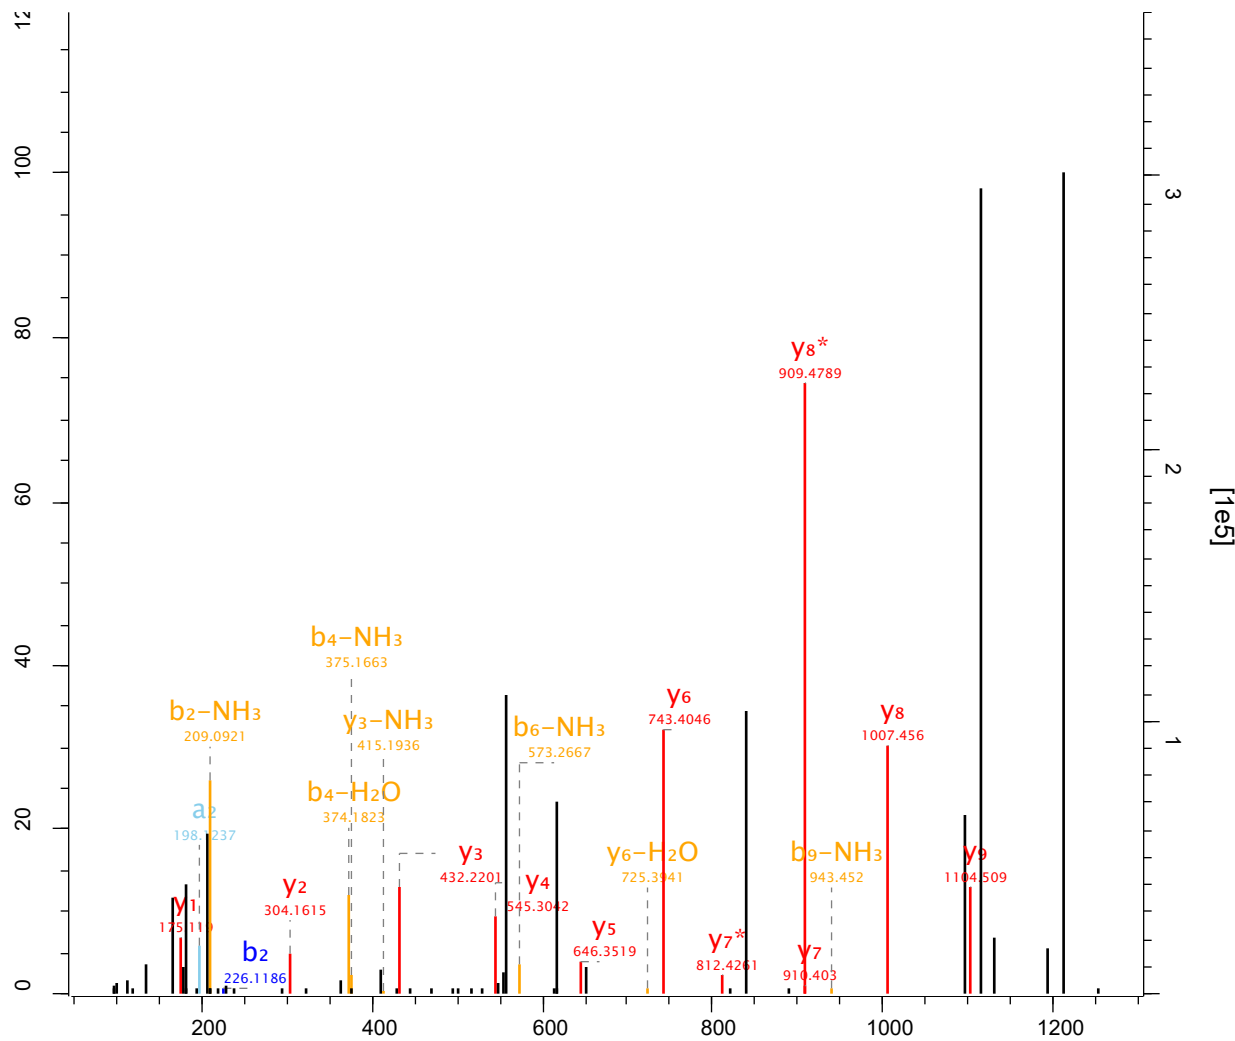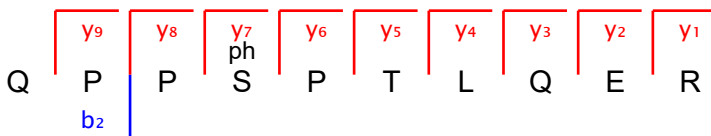

Raw file Scan Method Score m/z  
 sys\_00\_3short 8459 FTMS; HCD 147.33 521.73

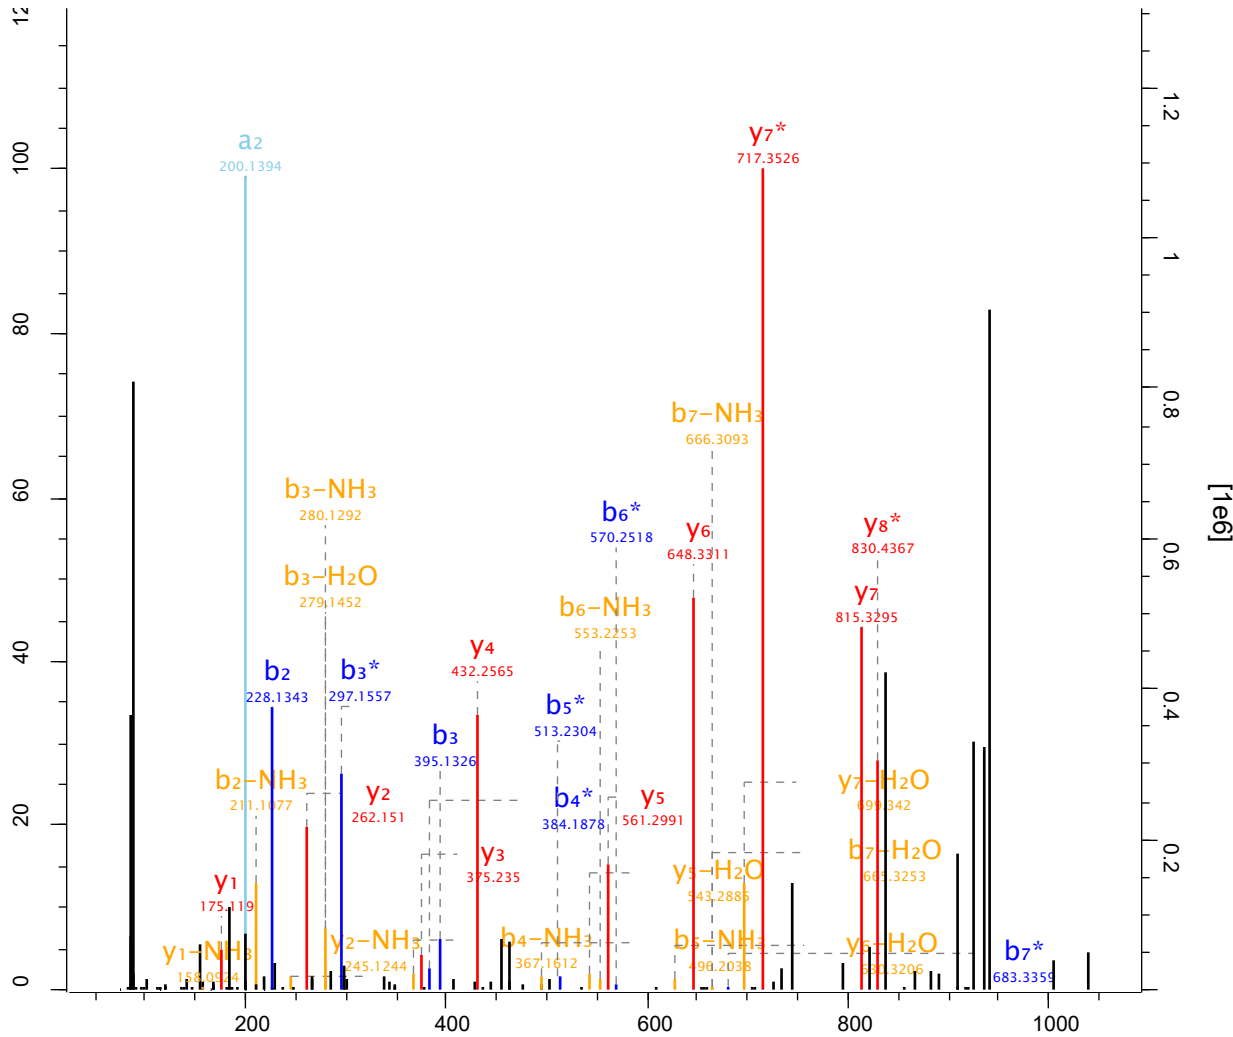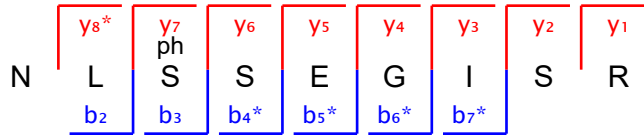

Raw file Scan Method Score m/z  
 sys\_00\_3short 8496 FTMS; HCD 100.69 469.72

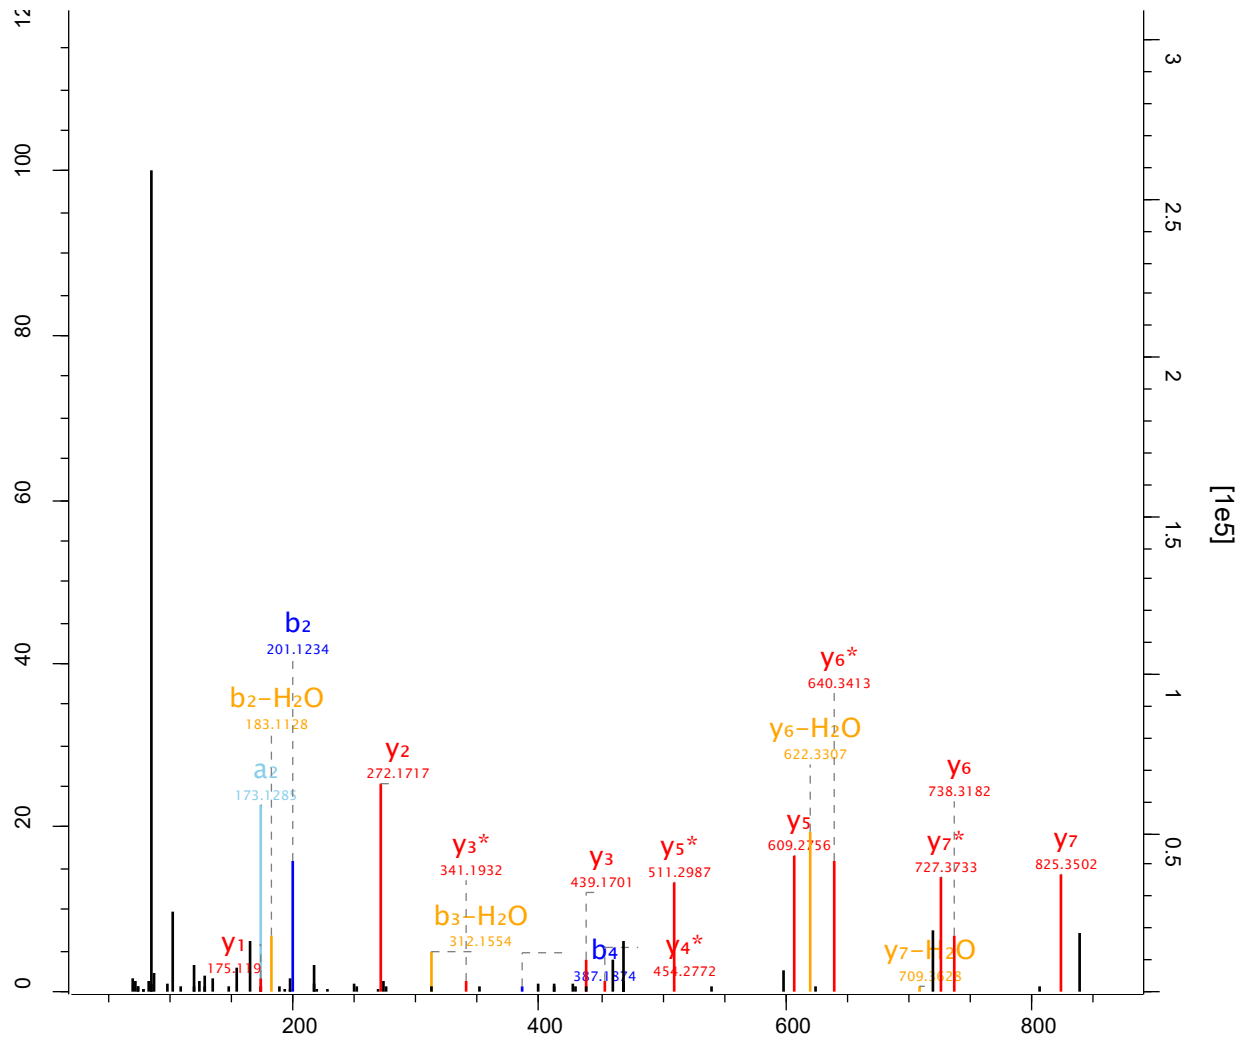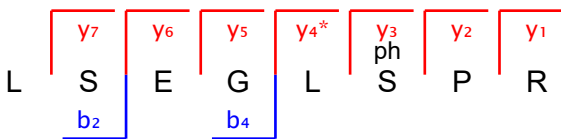



| Raw file      | Scan | Method    | Score | m/z    |
|---------------|------|-----------|-------|--------|
| sys_00_3short | 8704 | FTMS; HCD | 46.13 | 536.29 |

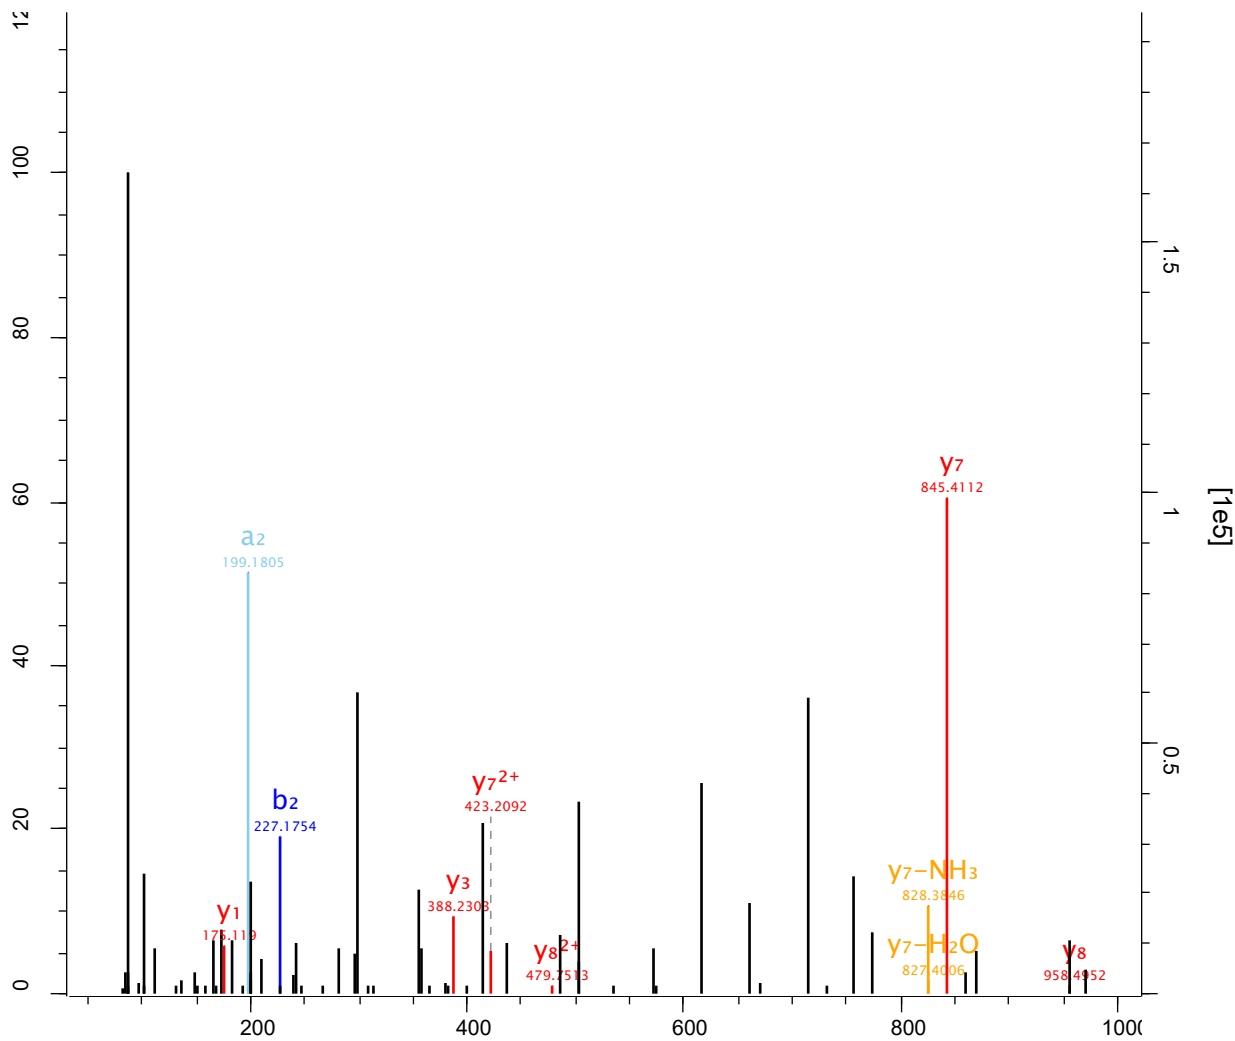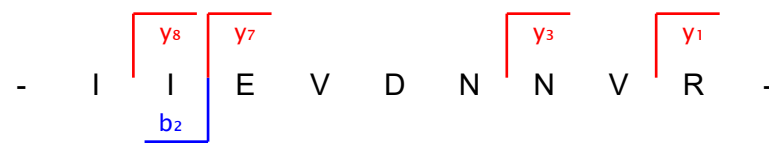

Raw file Scan Method Score m/z  
 sys\_00\_3short 8721 FTMS; HCD 116.55 496.69

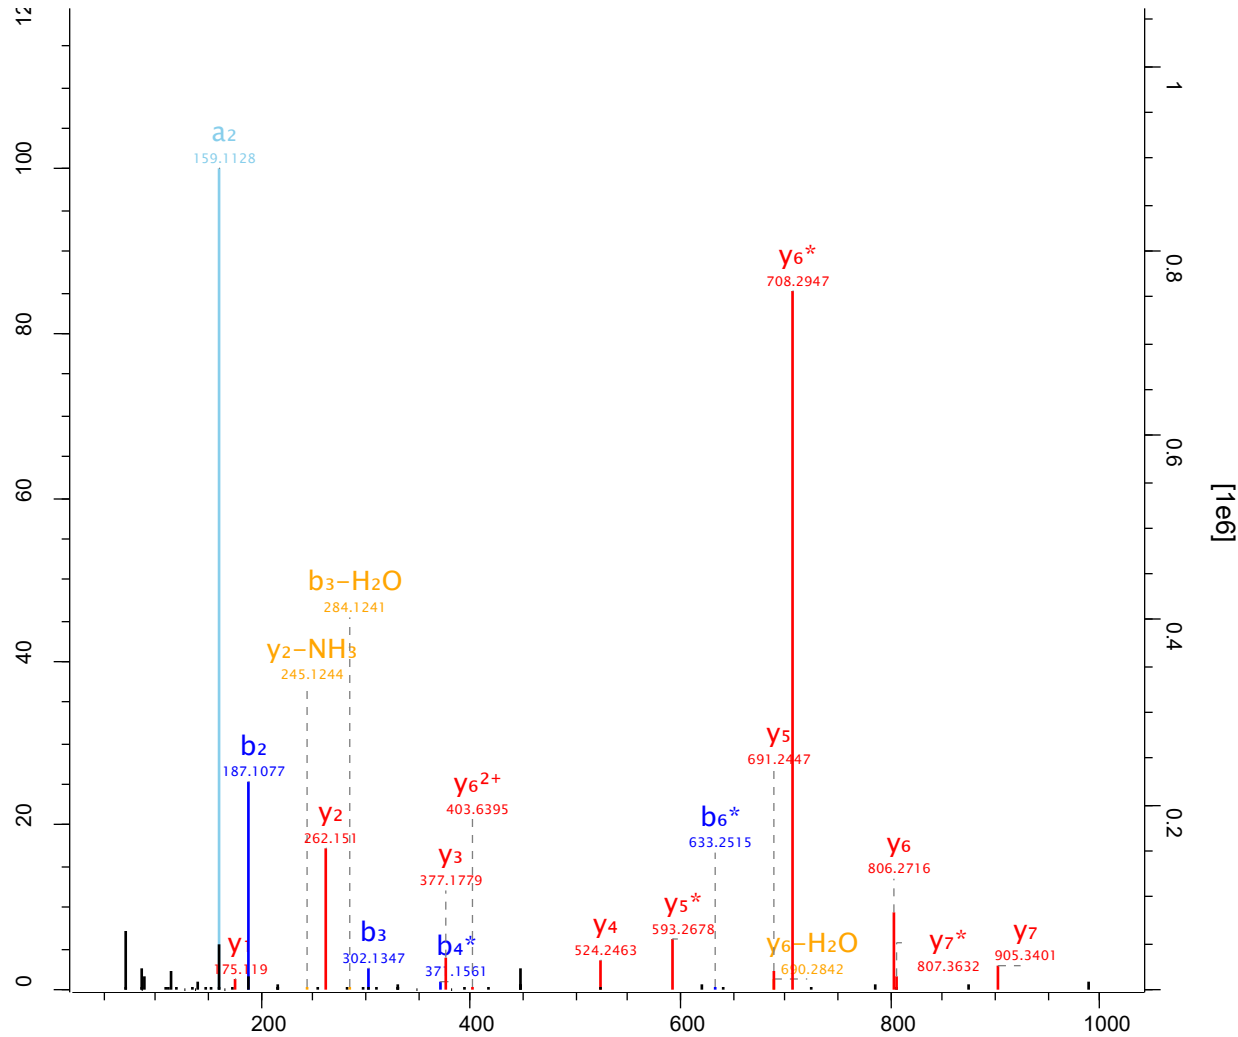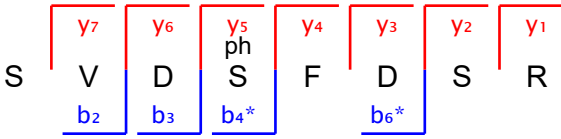

Raw file Scan Method Score m/z  
 sys\_00\_3short 8767 FTMS; HCD 74.99 604.24

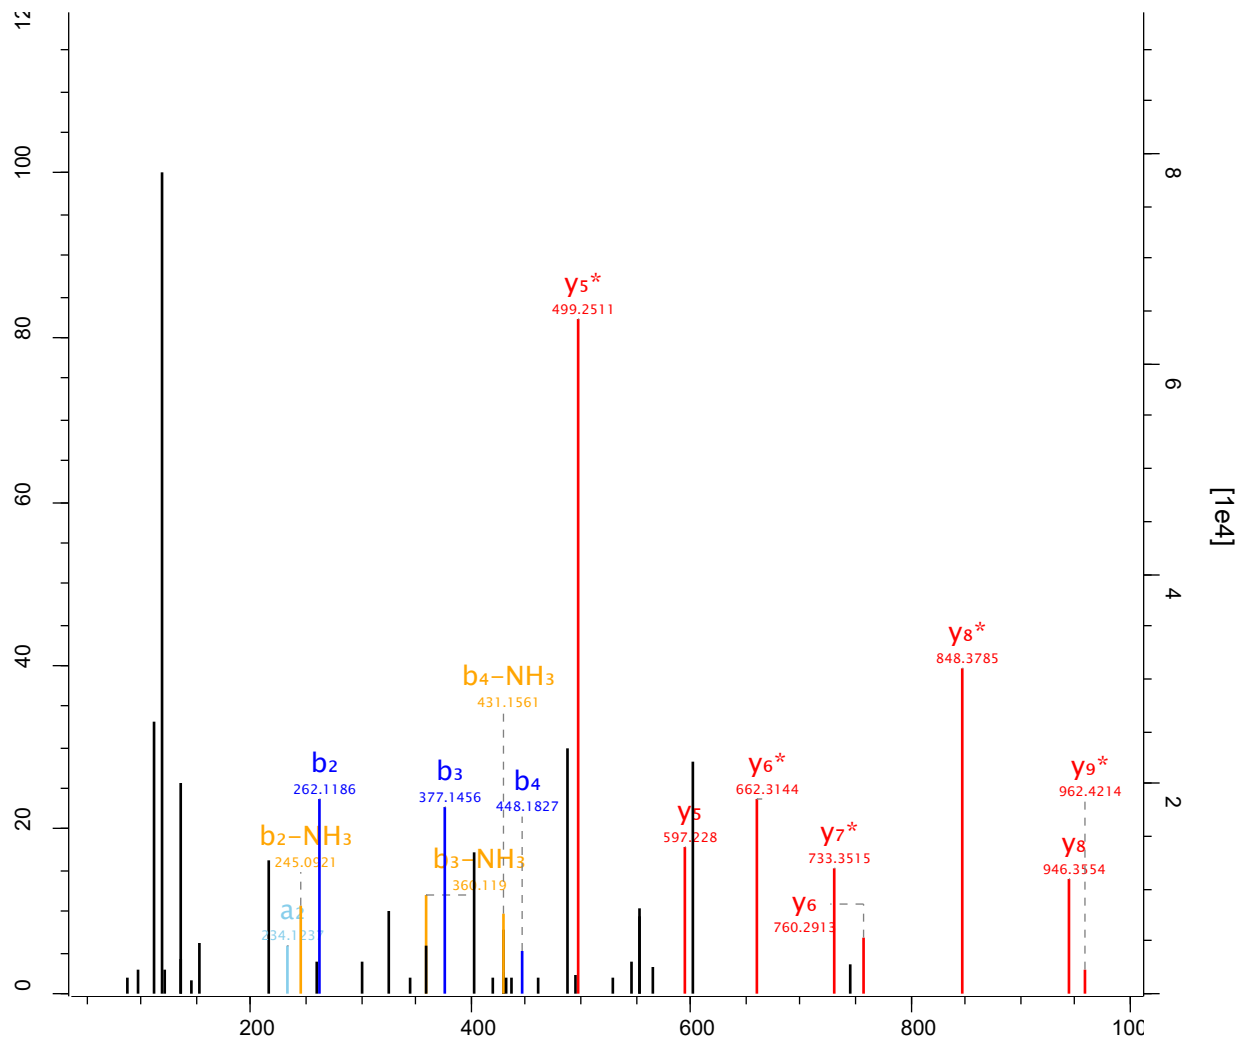

- F y<sub>9</sub>\* y<sub>8</sub> y<sub>7</sub>\* y<sub>6</sub> y<sub>5</sub> ph S G E K -  
b<sub>2</sub> b<sub>3</sub> b<sub>4</sub> N D A Y P

Raw file Scan Method Score m/z  
 sys\_00\_3short 8811 FTMS; HCD 68.66 474.19

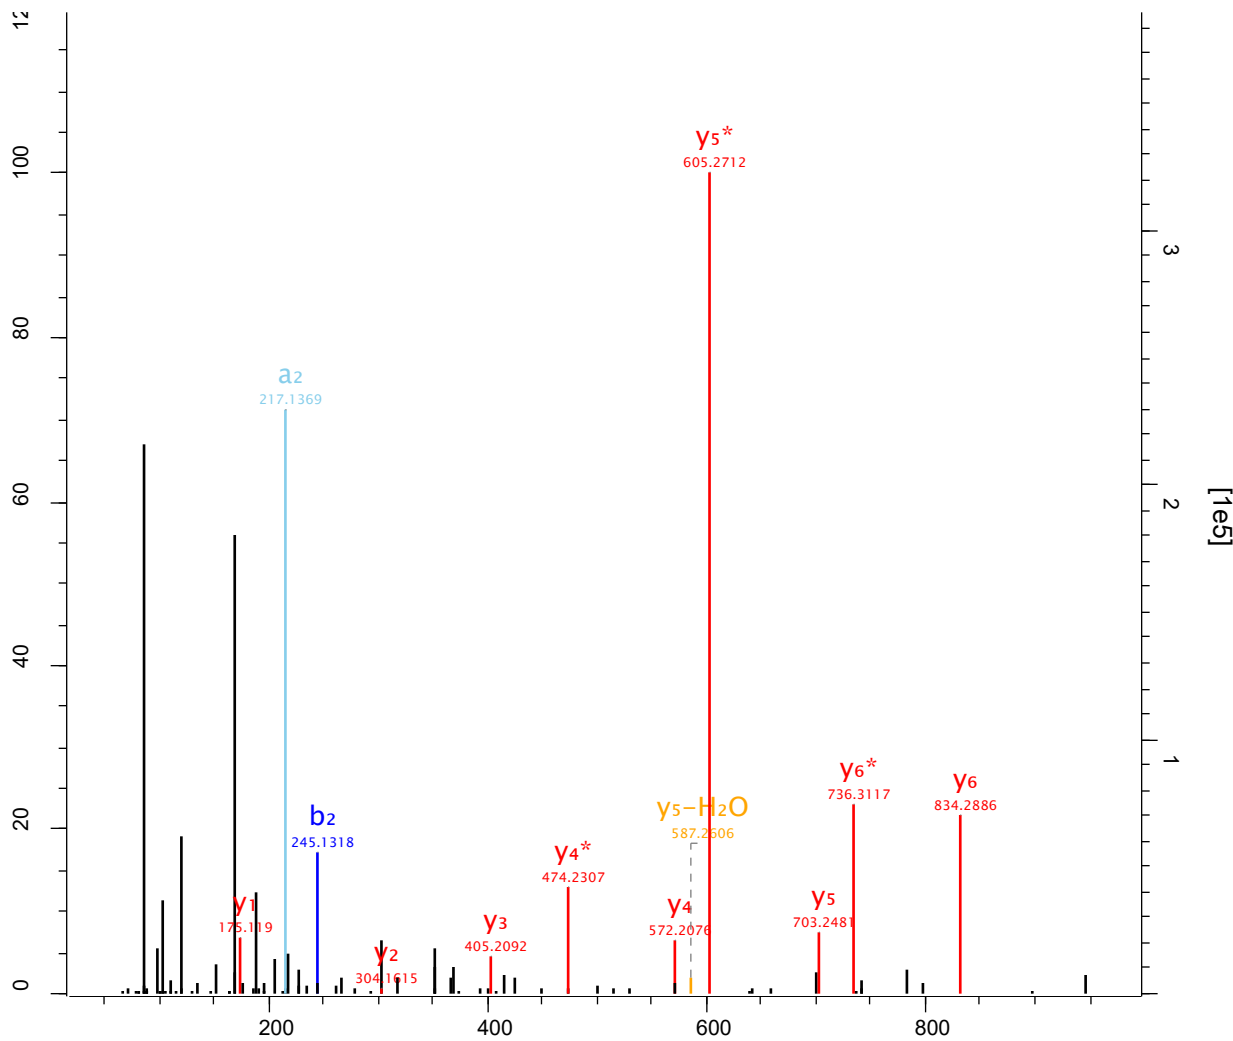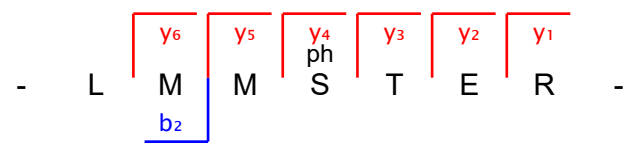

Raw file Scan Method Score m/z  
 sys\_00\_3short 8857 FTMS; HCD 154.1 578.74

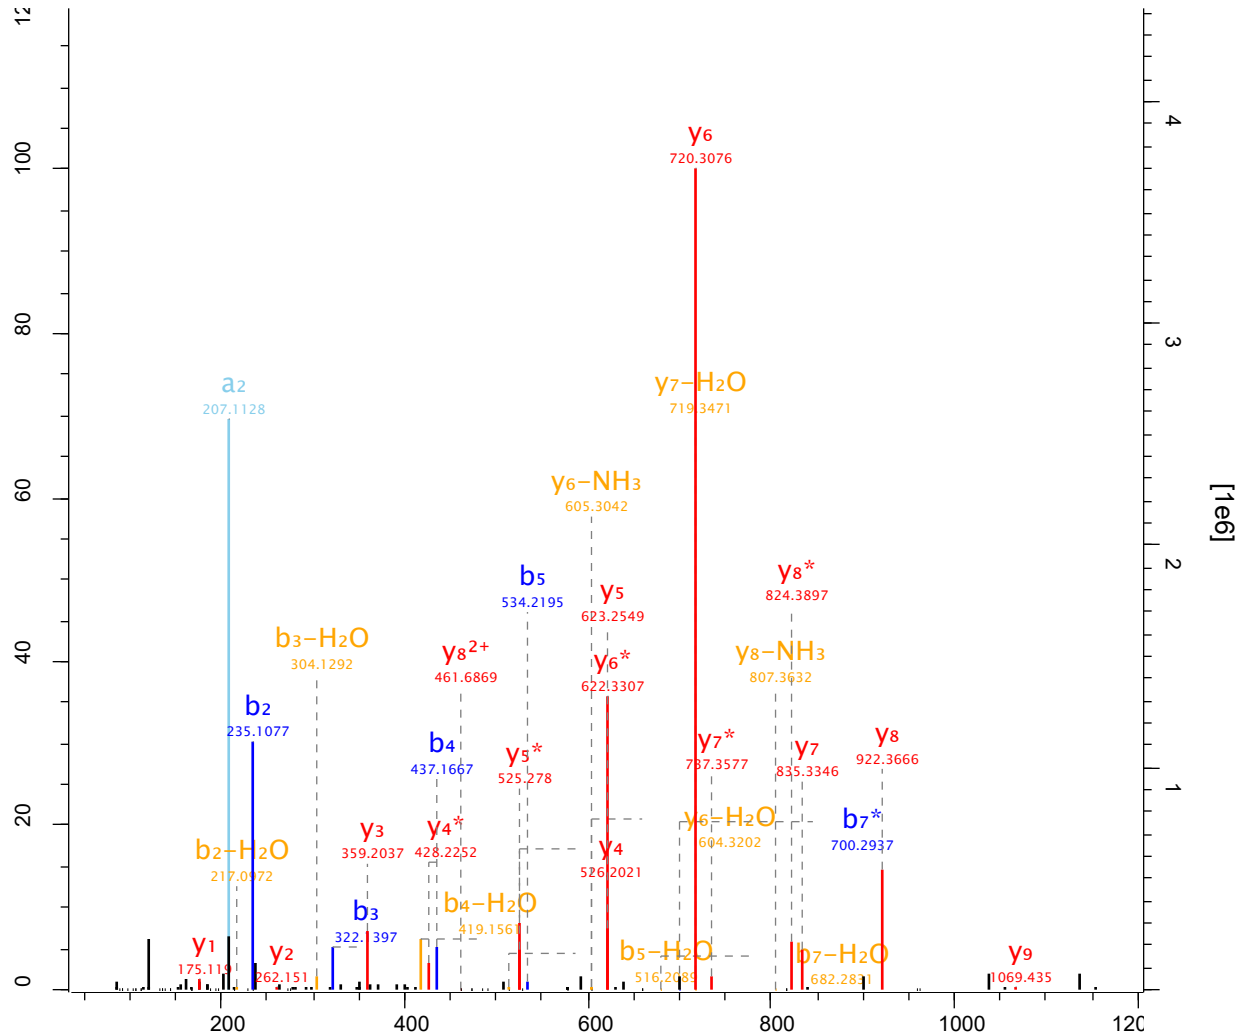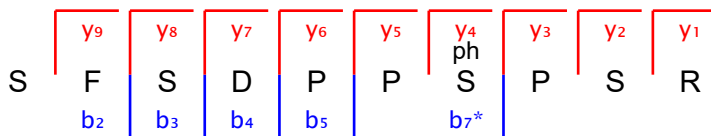

Raw file Scan Method Score m/z  
 sys\_00\_3short 8892 FTMS; HCD 99.5 627.24

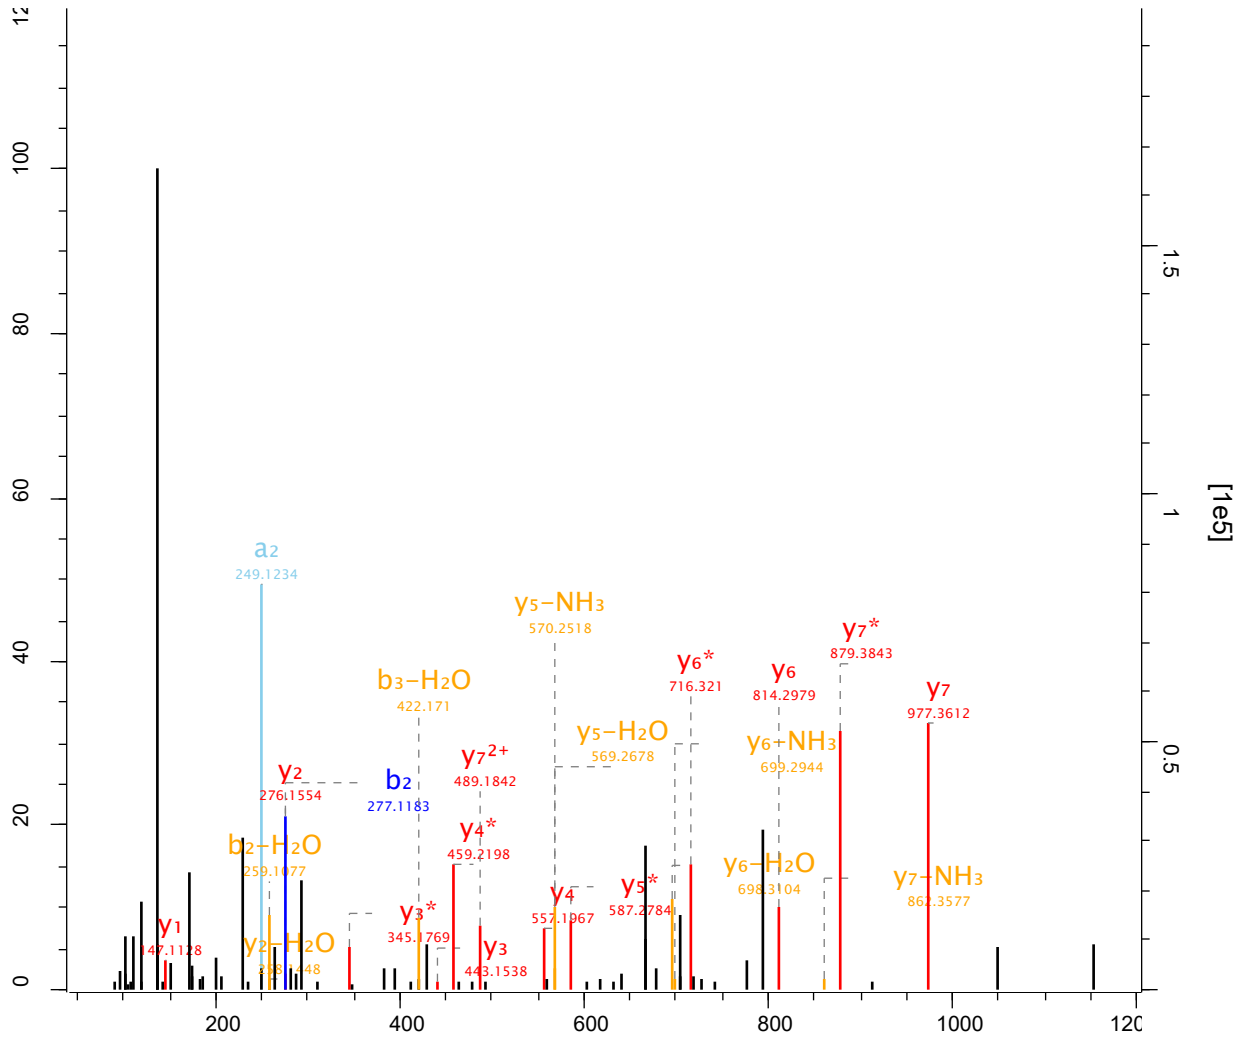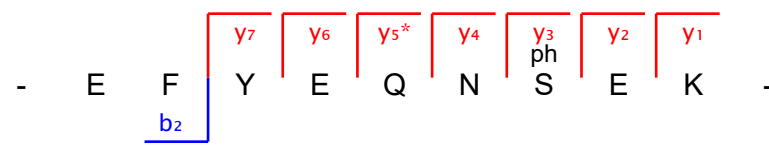

Raw file Scan Method Score m/z  
 sys\_00\_3short 8986 FTMS; HCD 175.08 637.78

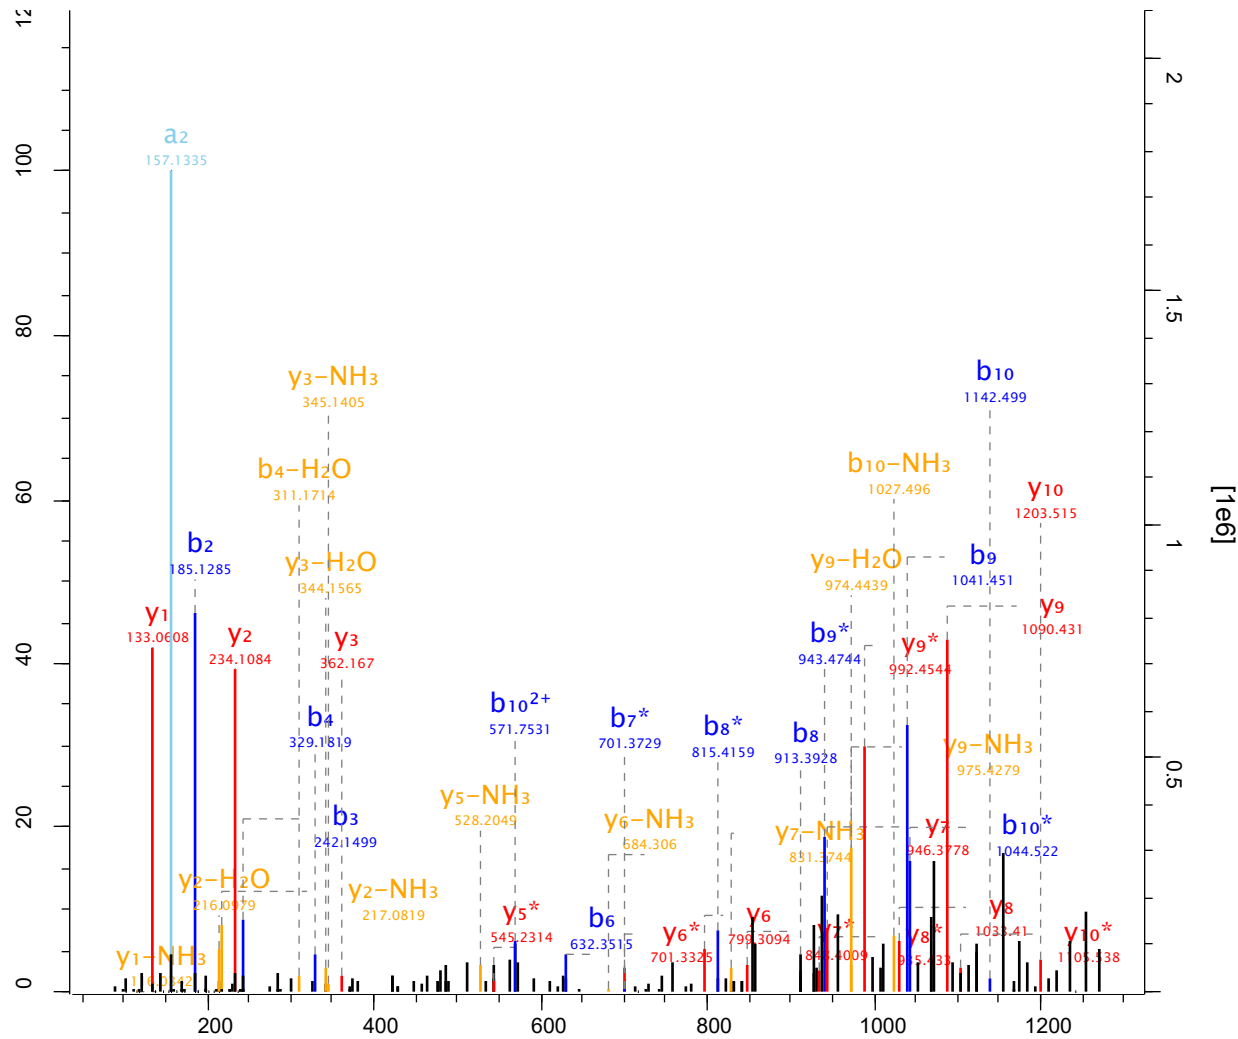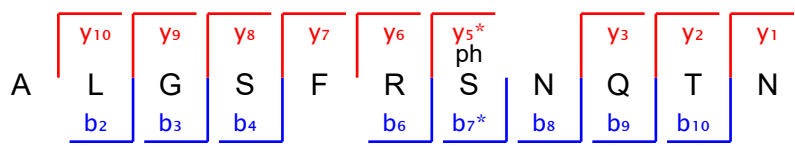

Raw file Scan Method Score m/z  
 sys\_00\_3short 9228 FTMS; HCD 105.58 620.3

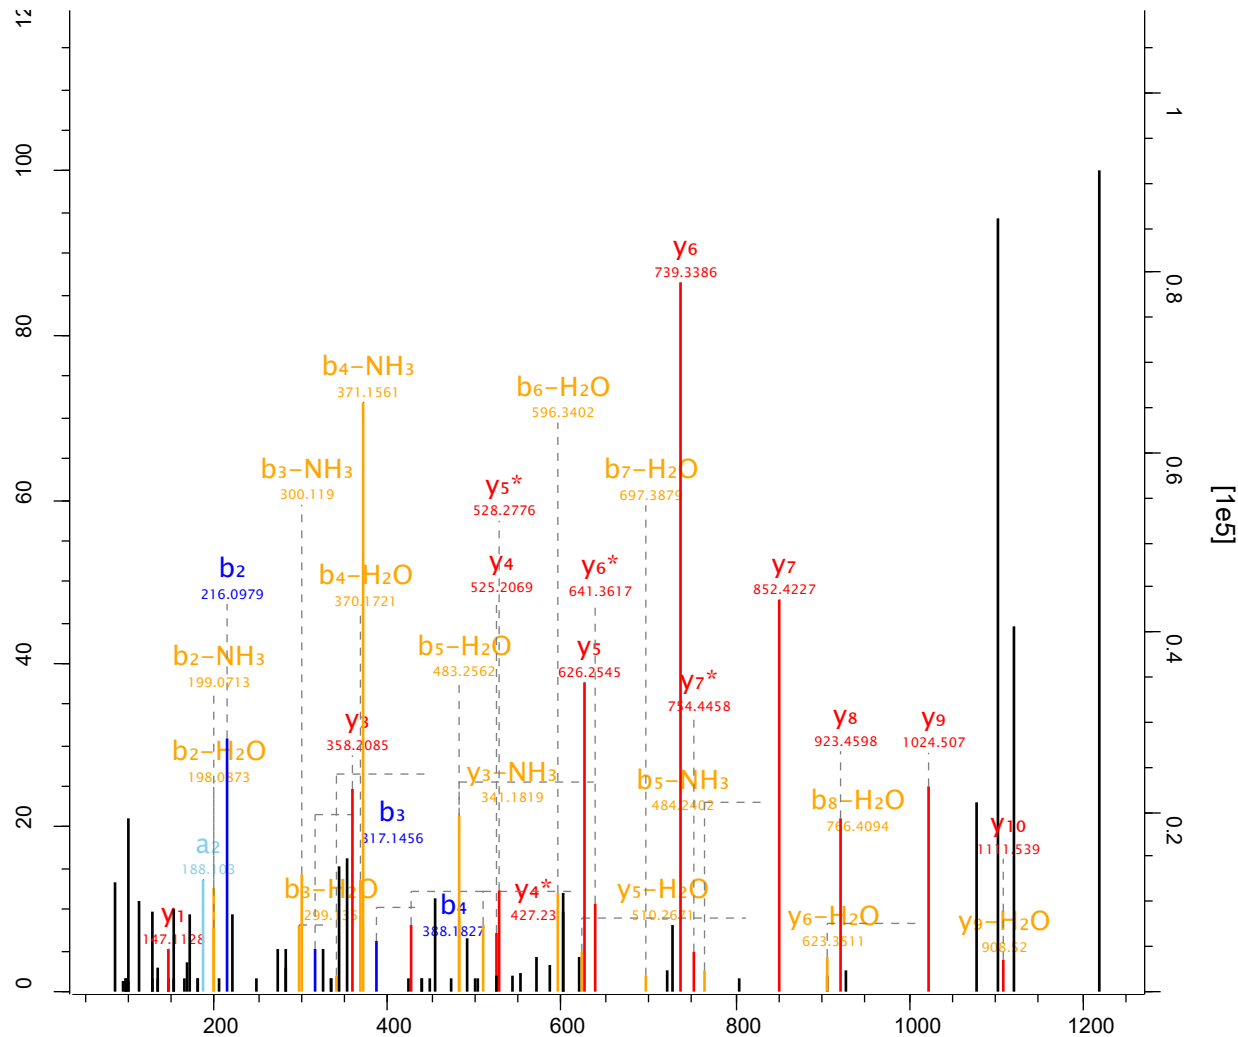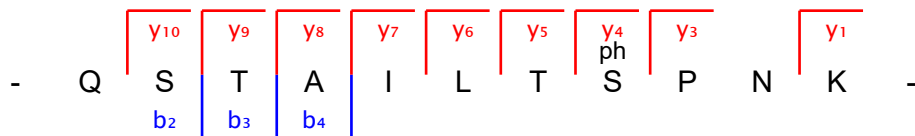



Raw file Scan Method Score m/z  
 sys\_00\_3short 9266 FTMS; HCD 80.23 398.19

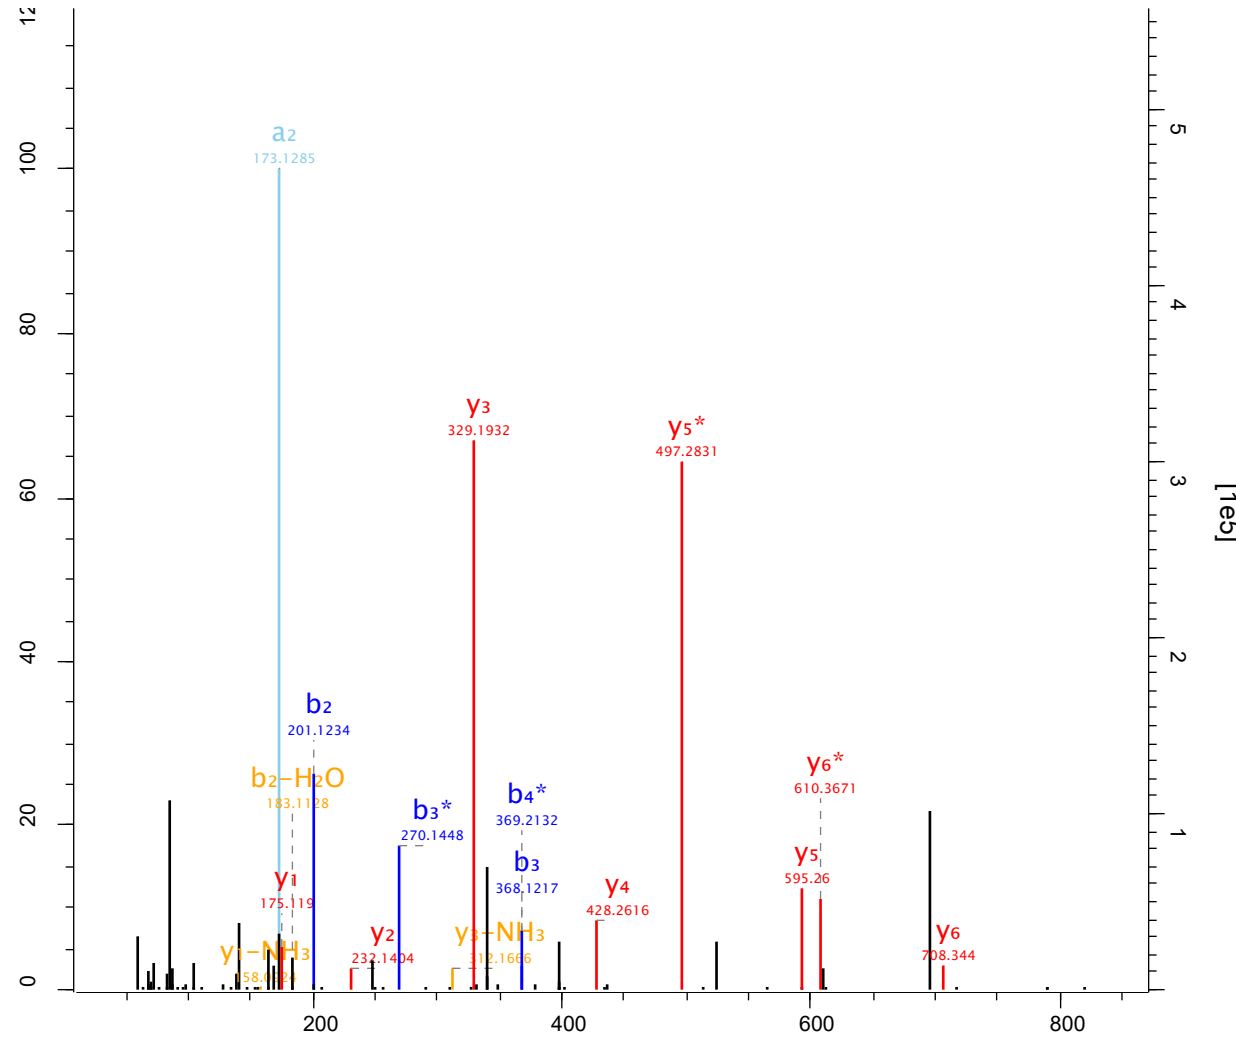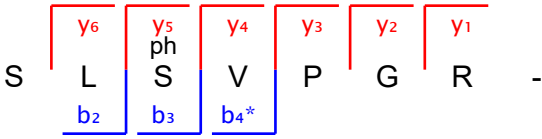

Raw file Scan Method Score m/z  
 sys\_00\_3short 9342 FTMS; HCD 98.9 538.76

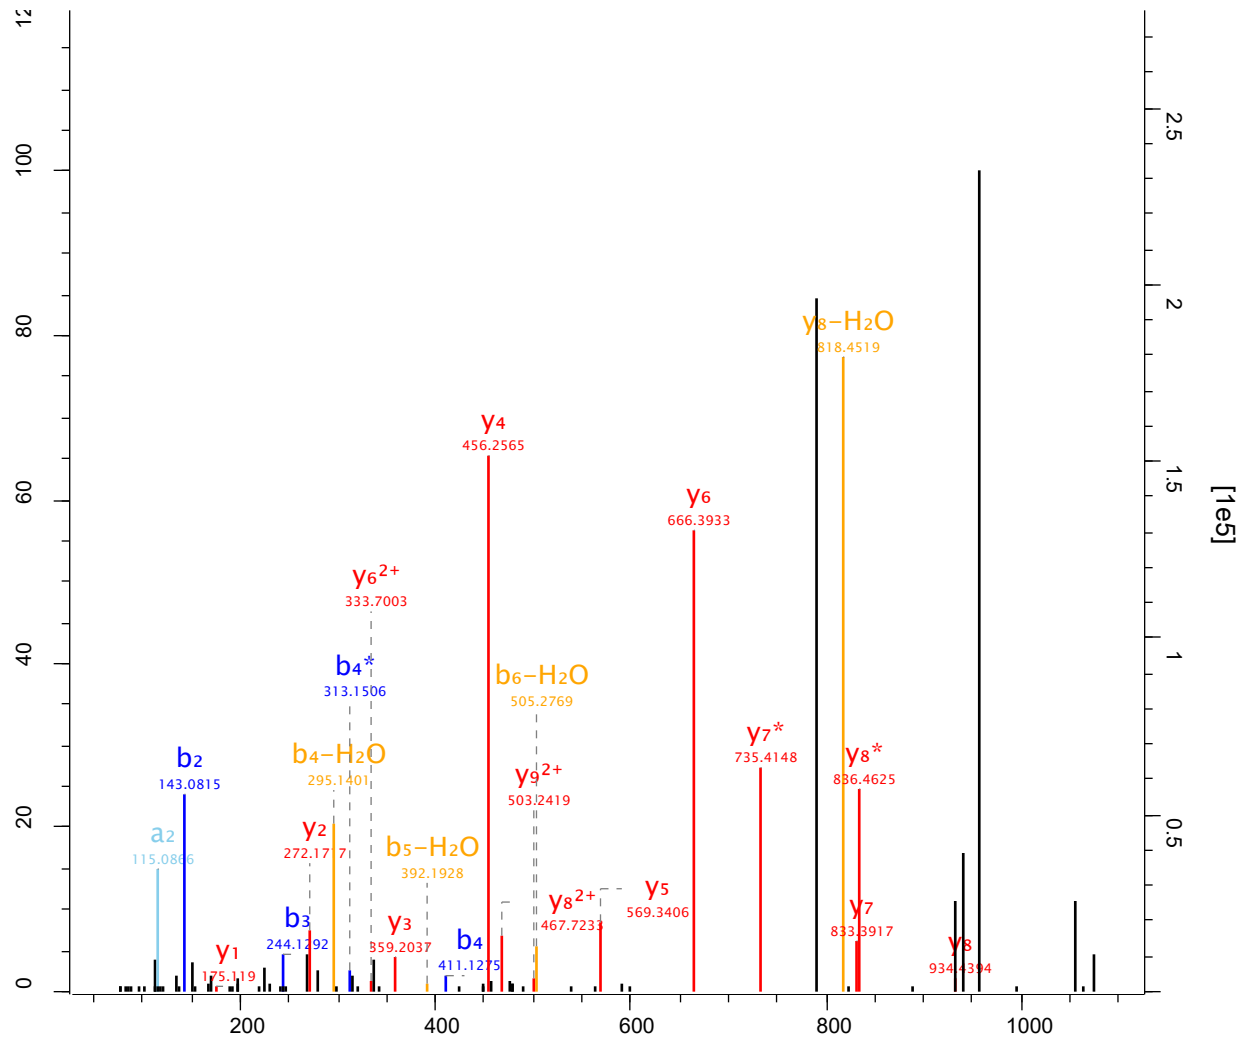

- A y9<sup>2+</sup> y8 y7 y6 y5 y4 y3 y2 y1 -  
 A T S P L P S P R  
b2 b3 b4

Raw file Scan Method Score m/z  
 sys\_00\_3short 9602 FTMS; HCD 41.4 406.7

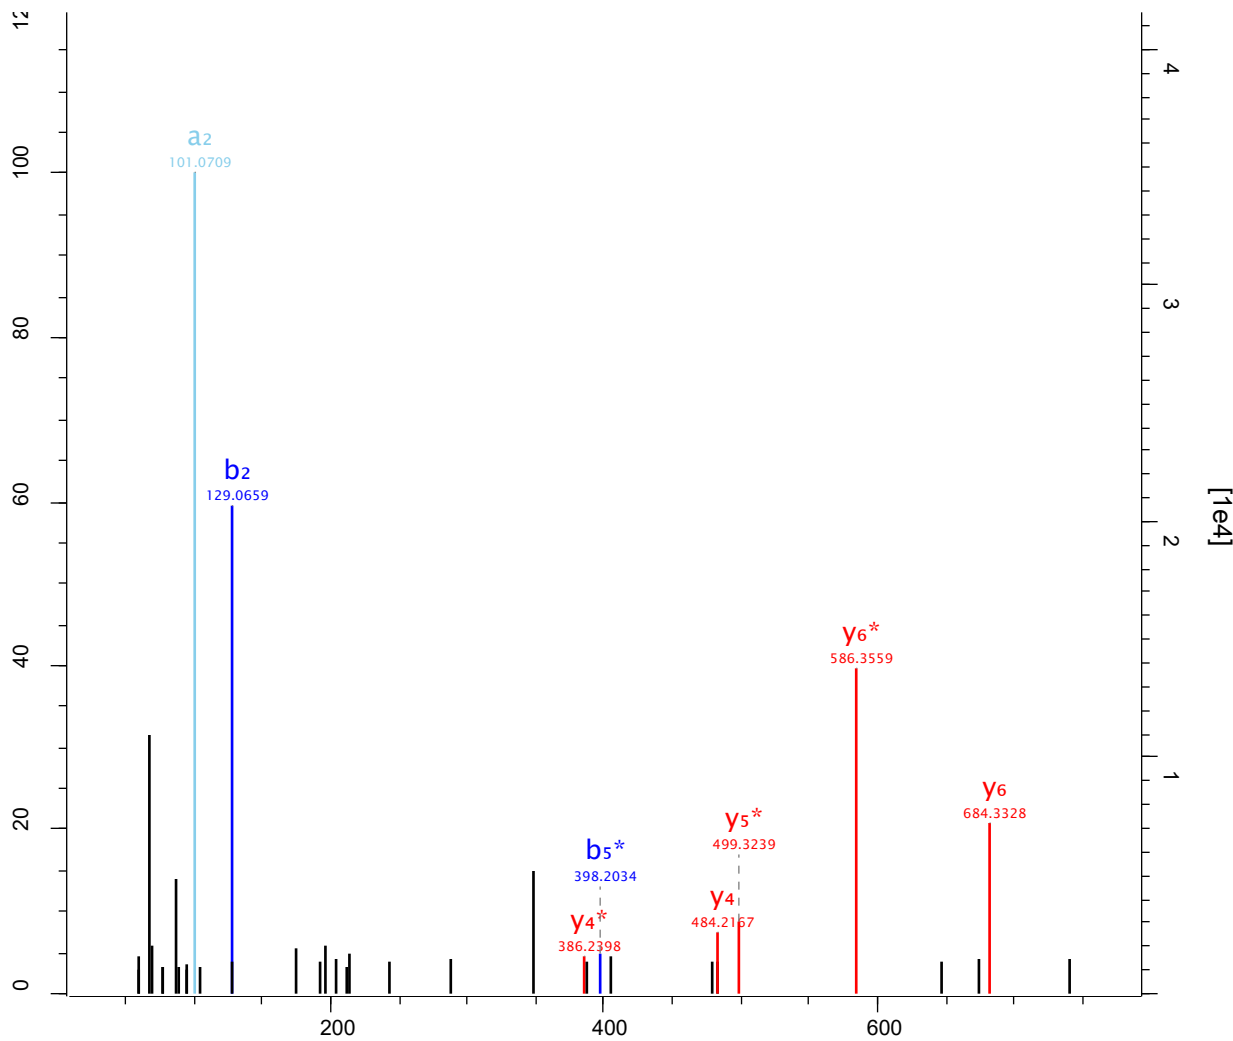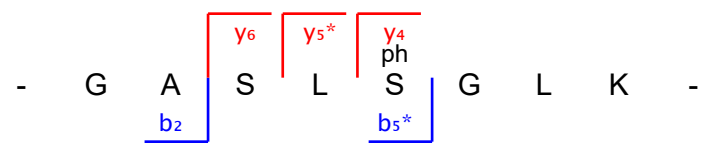

Raw file Scan Method Score m/z  
 sys\_00\_3short 9657 FTMS; HCD 119.04 676.8

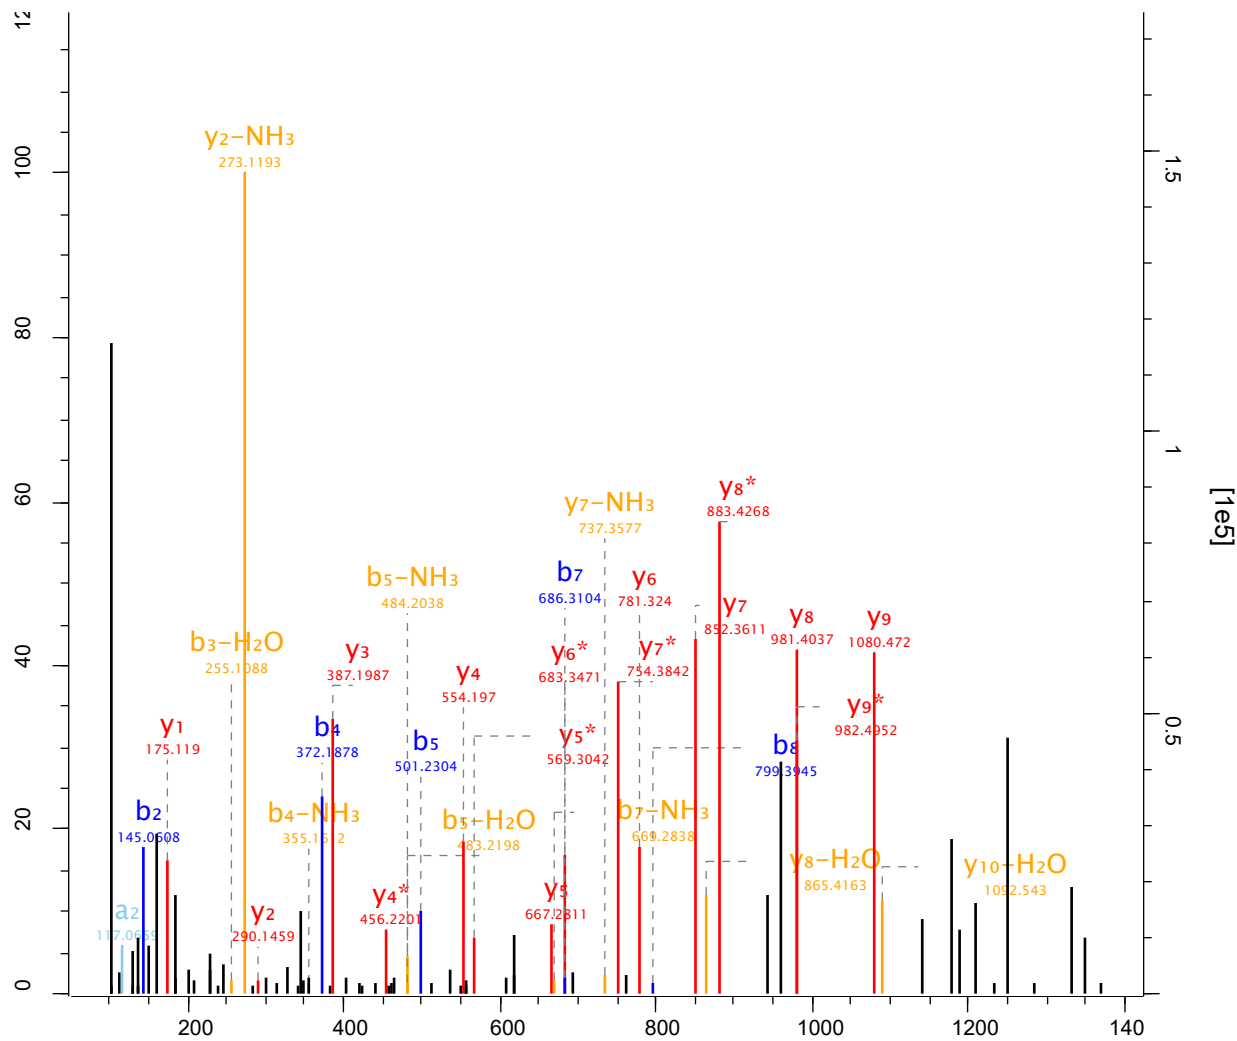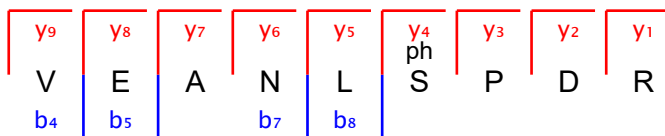

Raw file Scan Method Score m/z  
 sys\_00\_3short 9951 FTMS; HCD 142.12 577.77

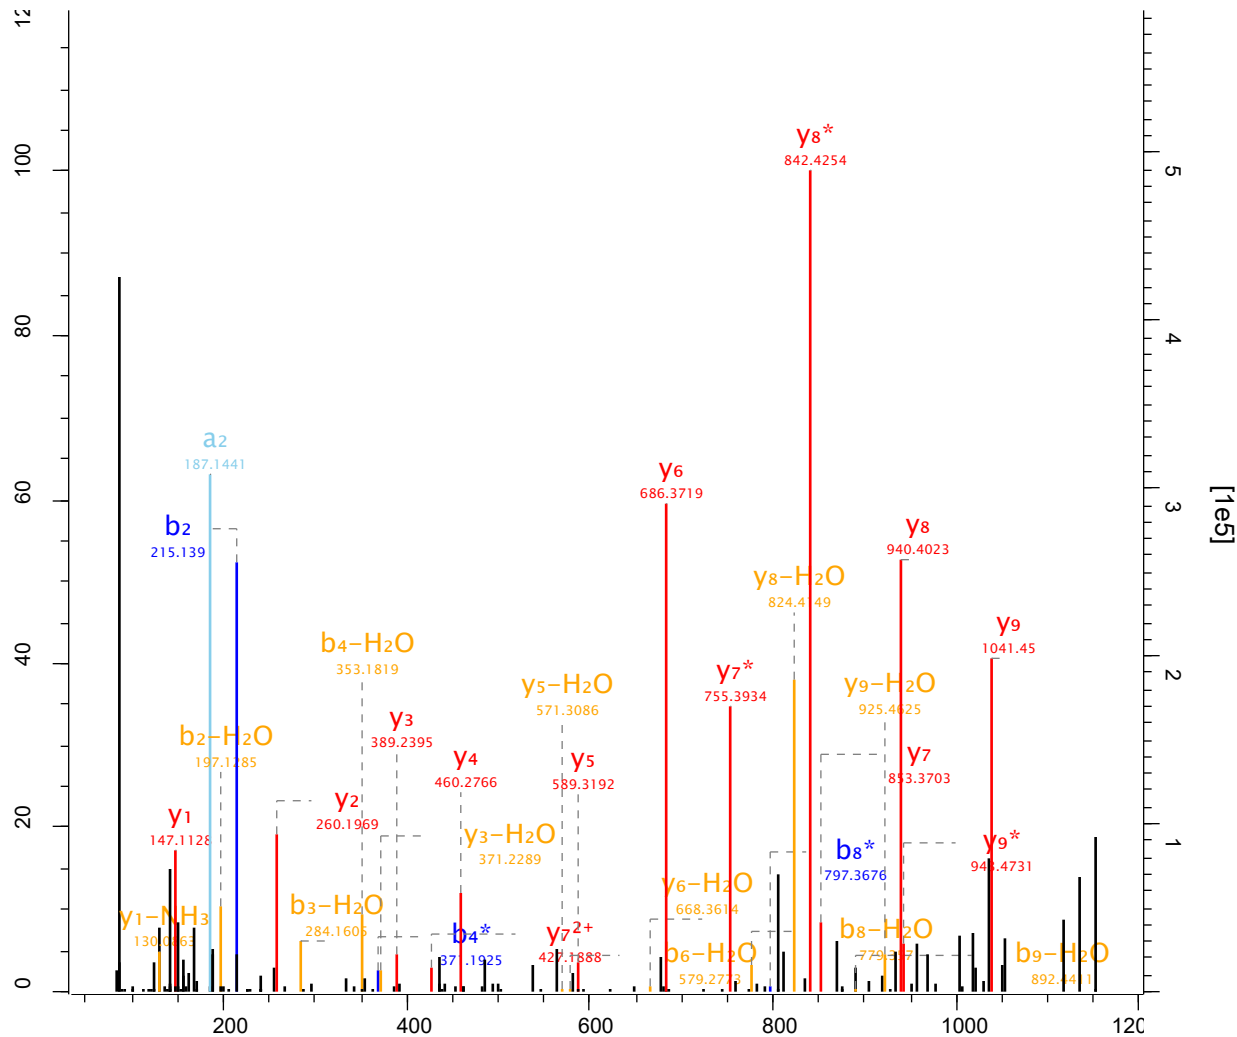

- L T S S P E A E I K -  
 b2 b4\* b8\*

Raw file Scan Method Score m/z  
 sys\_02\_2 10092 FTMS; HCD 50.9 502.24

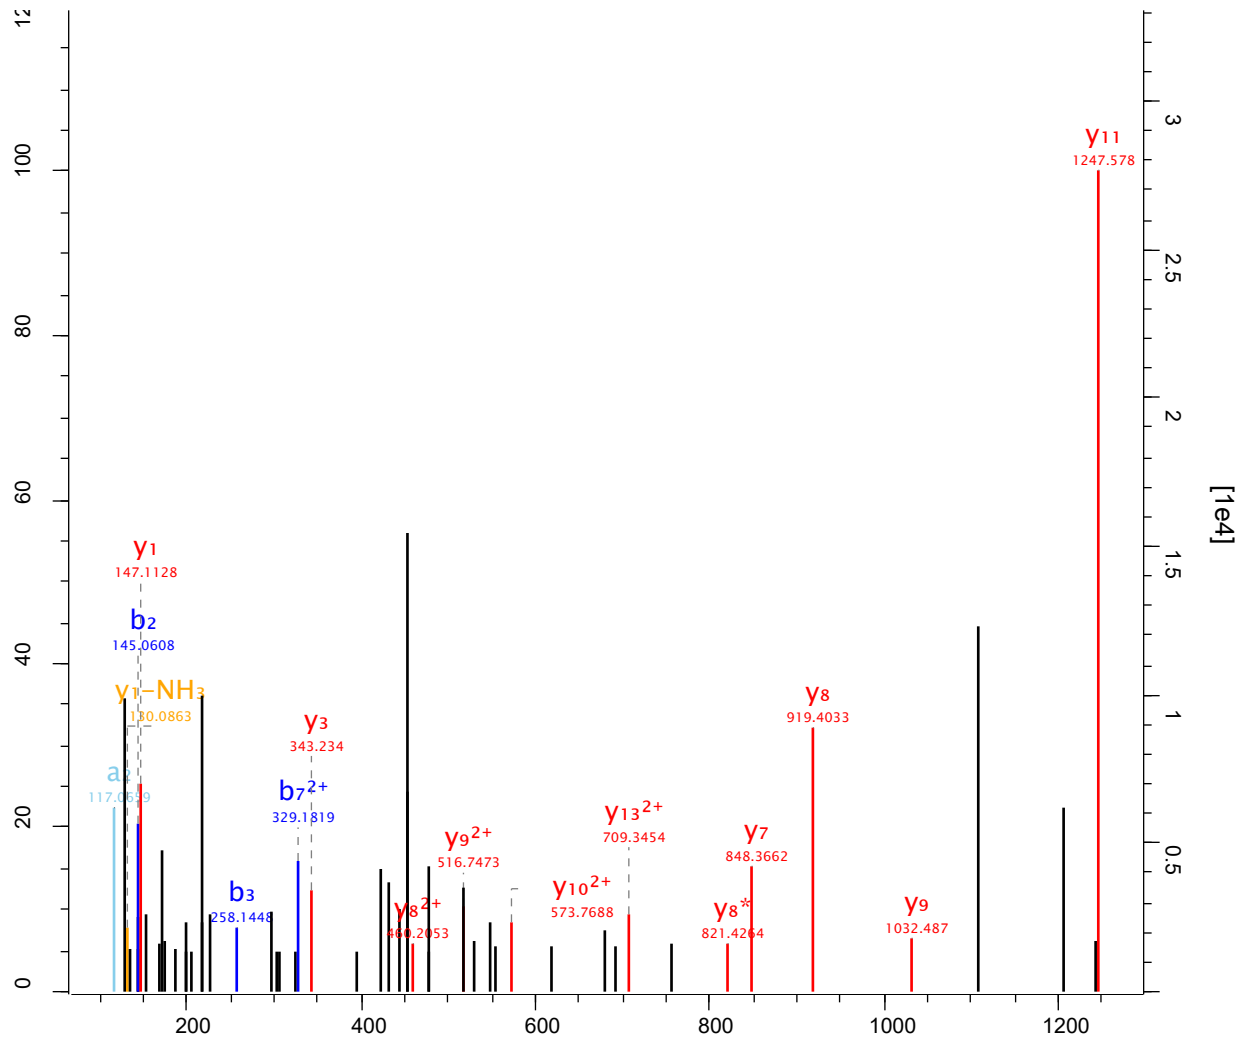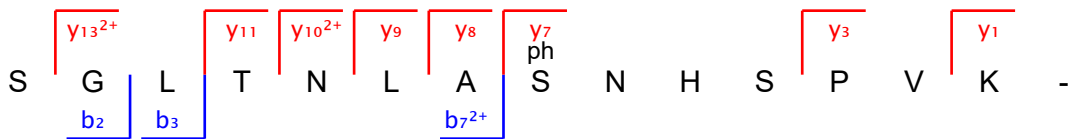

Raw file Scan Method Score m/z  
 sys\_02\_2 10197 FTMS; HCD 42.32 616.29

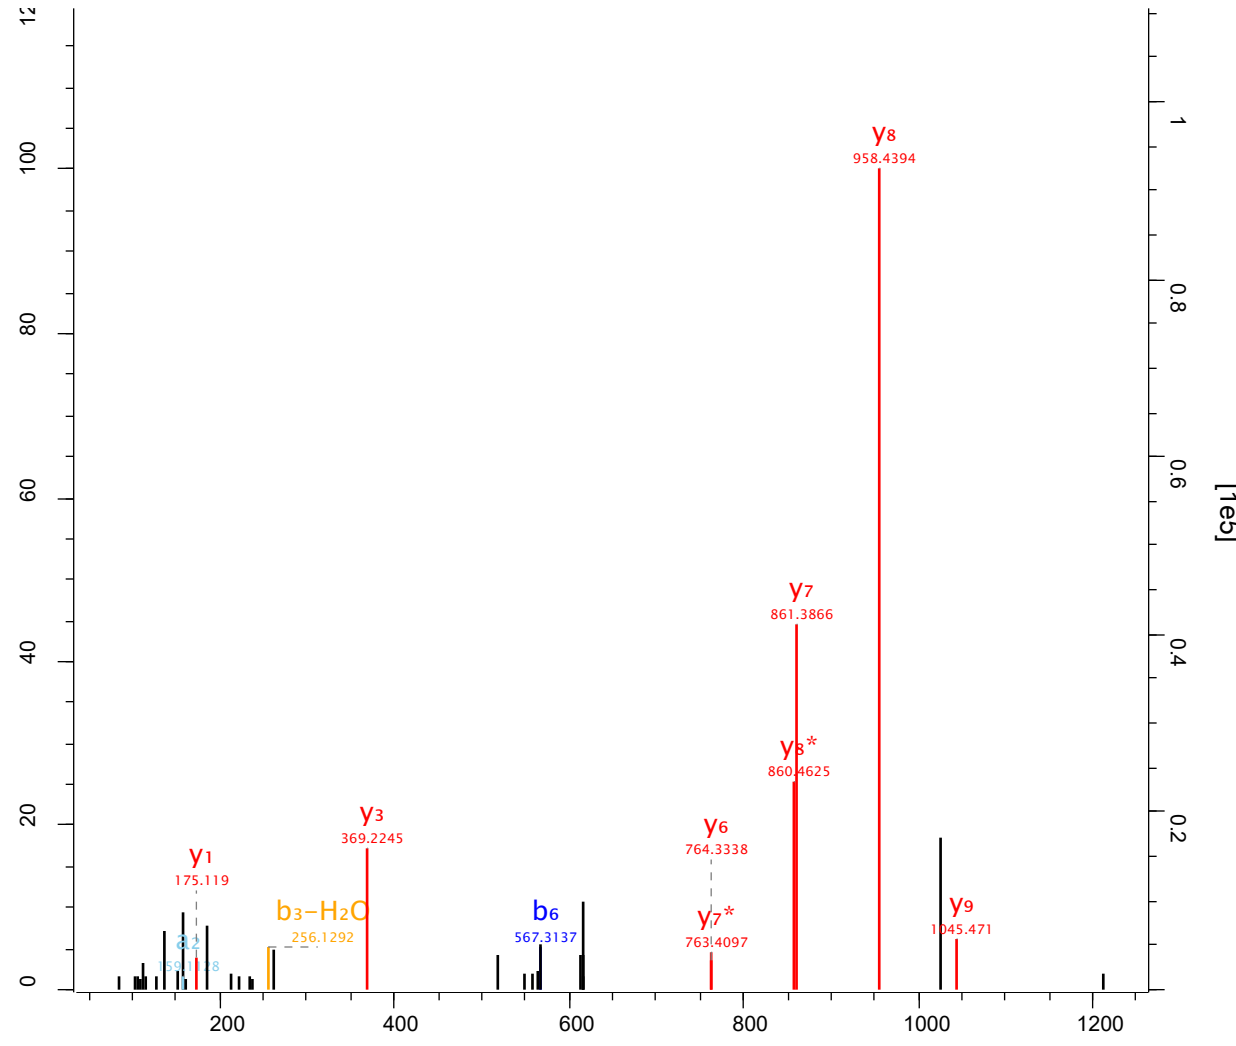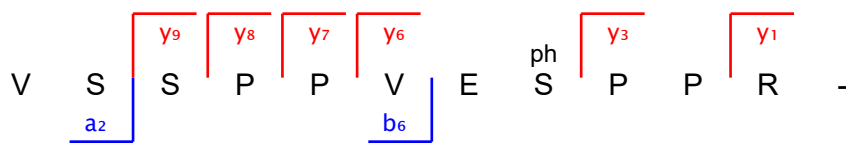

Raw file Scan Method Score m/z  
 sys\_02\_2 10215 FTMS; HCD 94.12 560.78

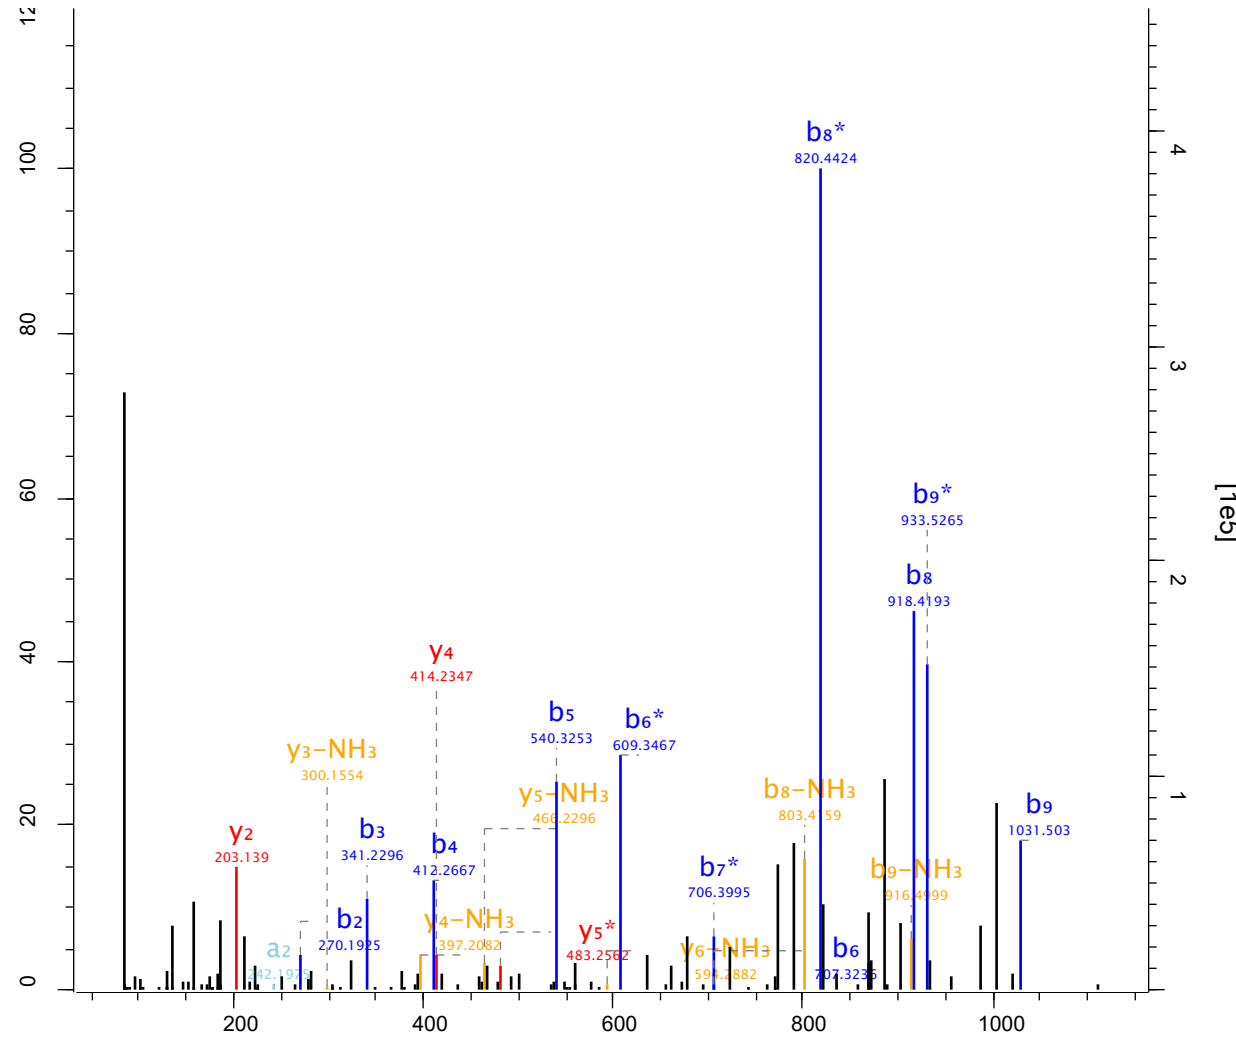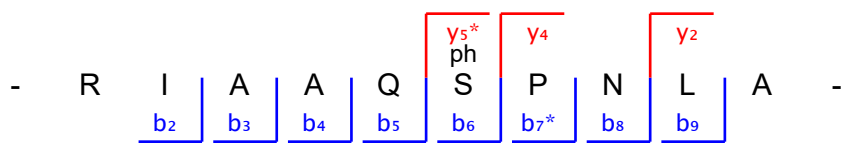



Raw file Scan Method Score m/z  
 sys\_02\_2 10248 FTMS; HCD 130.56 870.38

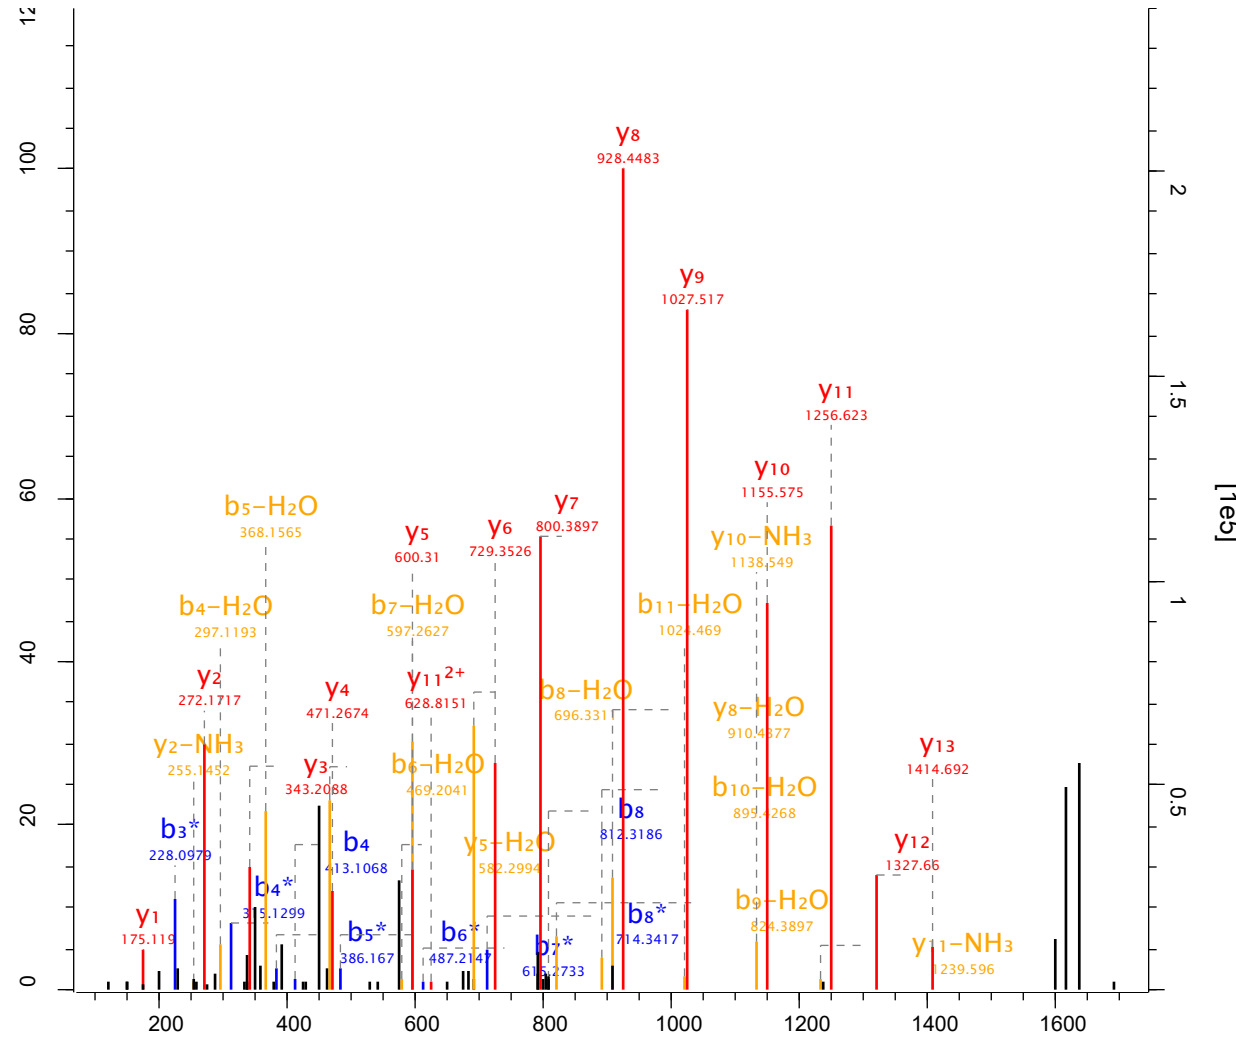

ph  
 - S S A S A T Q V Q A E E Q A P  
 b3\* b4 b5\* b6\* b7\* b8  
 y1  
 R -

| Raw file | Scan  | Method    | Score | m/z    |
|----------|-------|-----------|-------|--------|
| sys_02_2 | 10362 | FTMS; HCD | 47.77 | 393.86 |

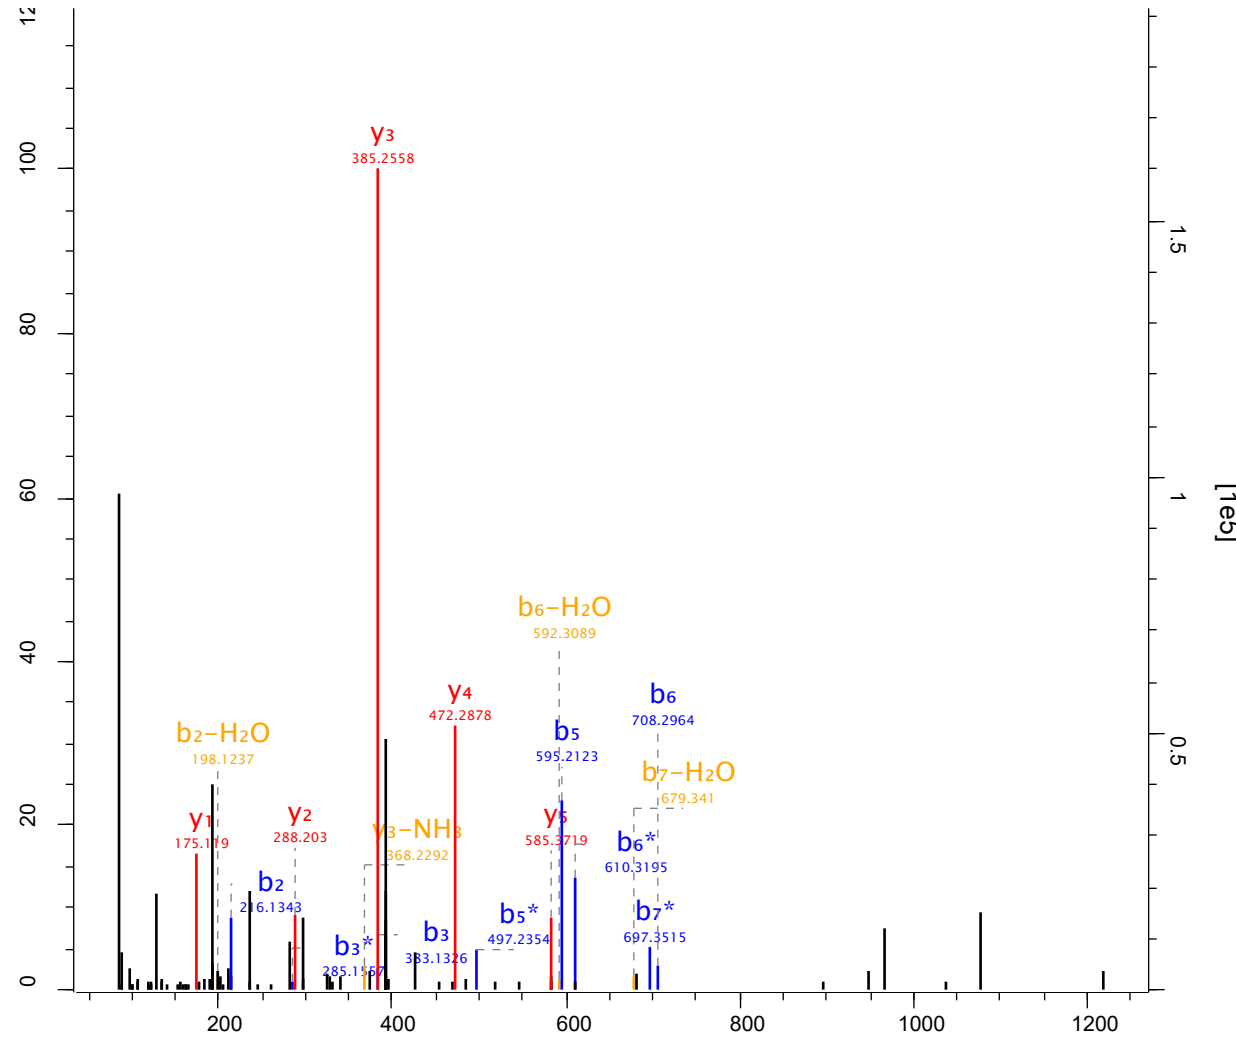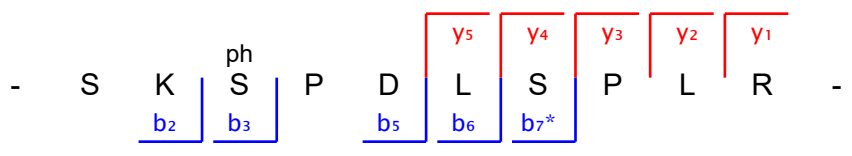

Raw file sys\_02\_2 Scan 10407 Method FTMS; HCD Score 248.95 m/z 706.31

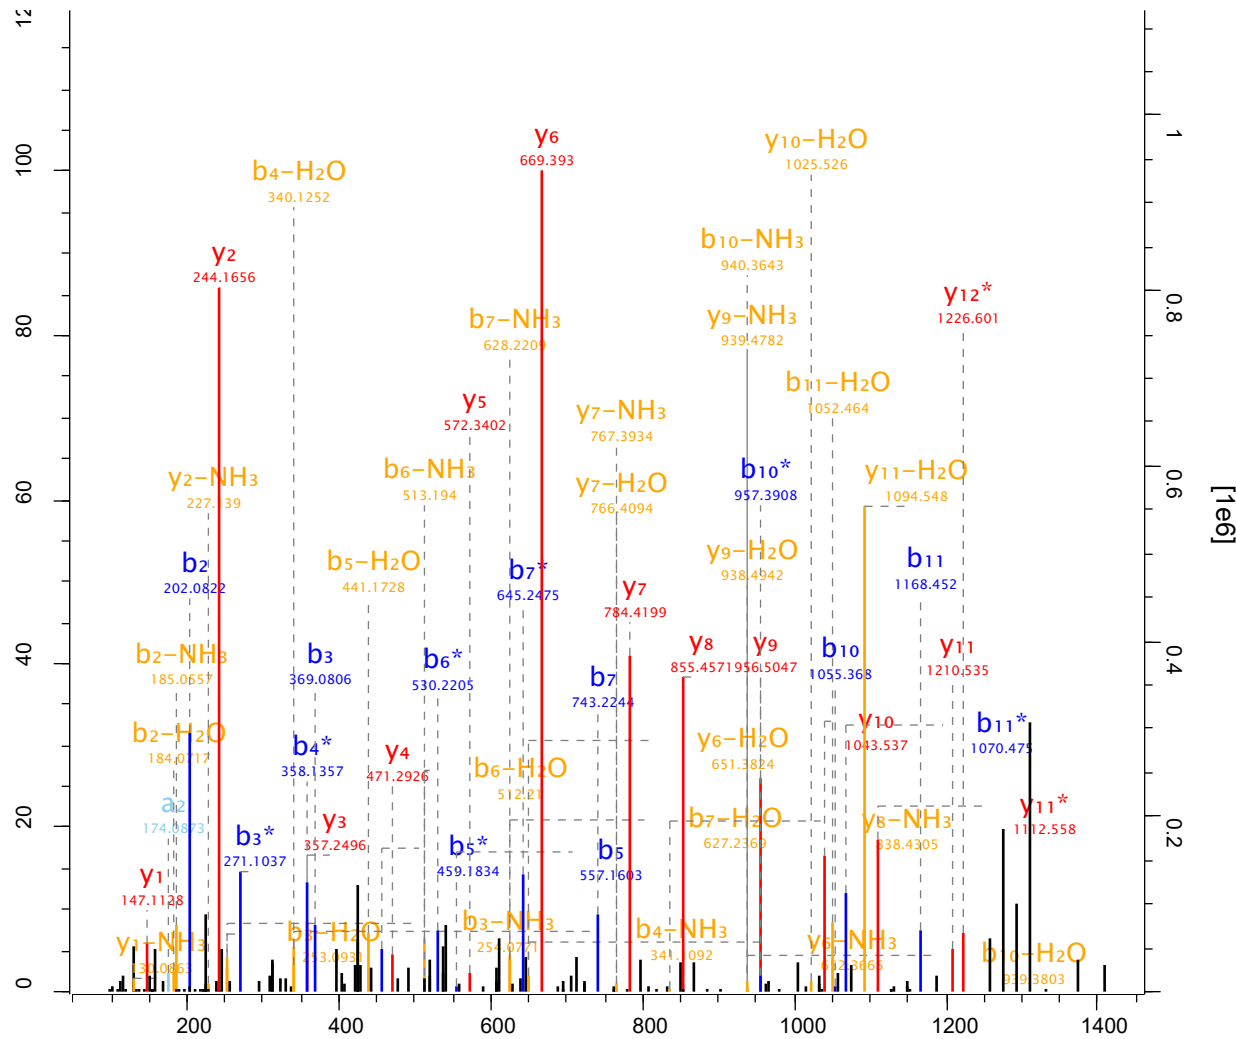

- S N N S T A D P T N I P K -

y12\*
y11
y10
y9
y8
y7
y6
y5
y4
y3
y2
y1

b2
b3
b4\*
b5
b6\*
b7
b10
b11

Raw file Scan Method Score m/z  
 sys\_02\_2 10429 FTMS; HCD 142.08 517.72

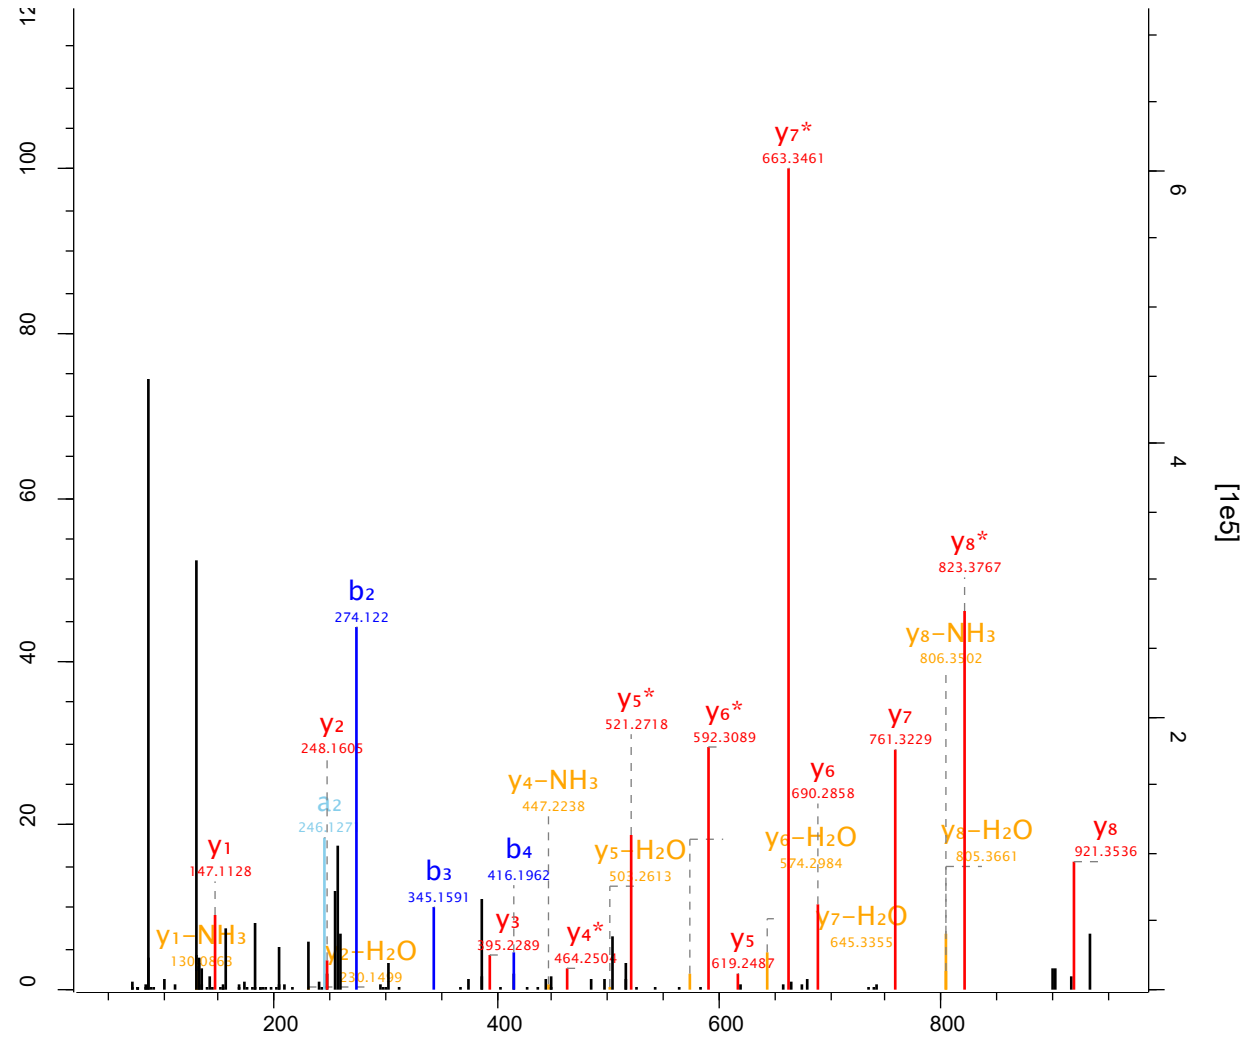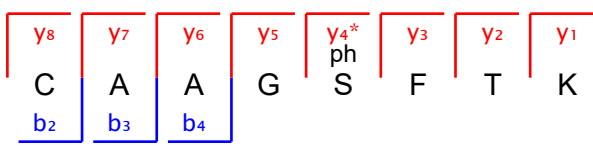

Raw file Scan Method Score m/z  
 sys\_02\_2 10449 FTMS; HCD 70.26 463.22

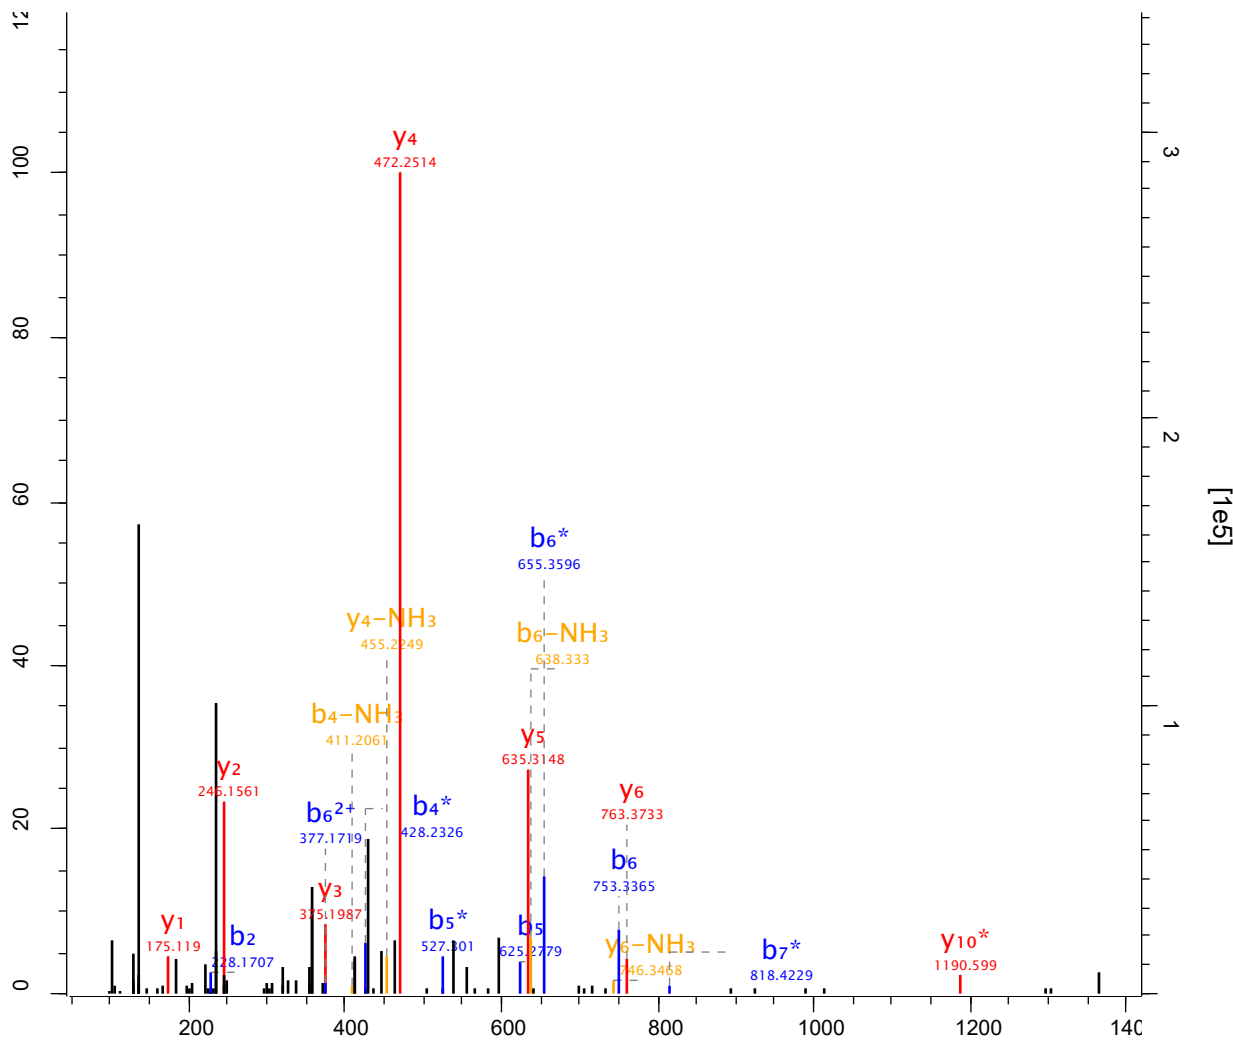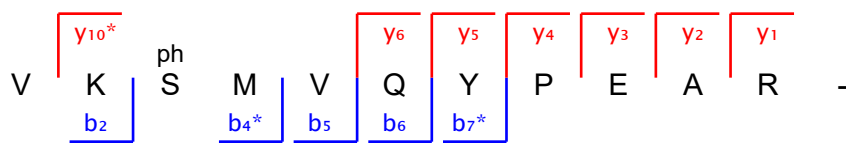

Raw file Scan Method Score m/z  
 sys\_02\_2 10482 FTMS; HCD 190.24 724.28

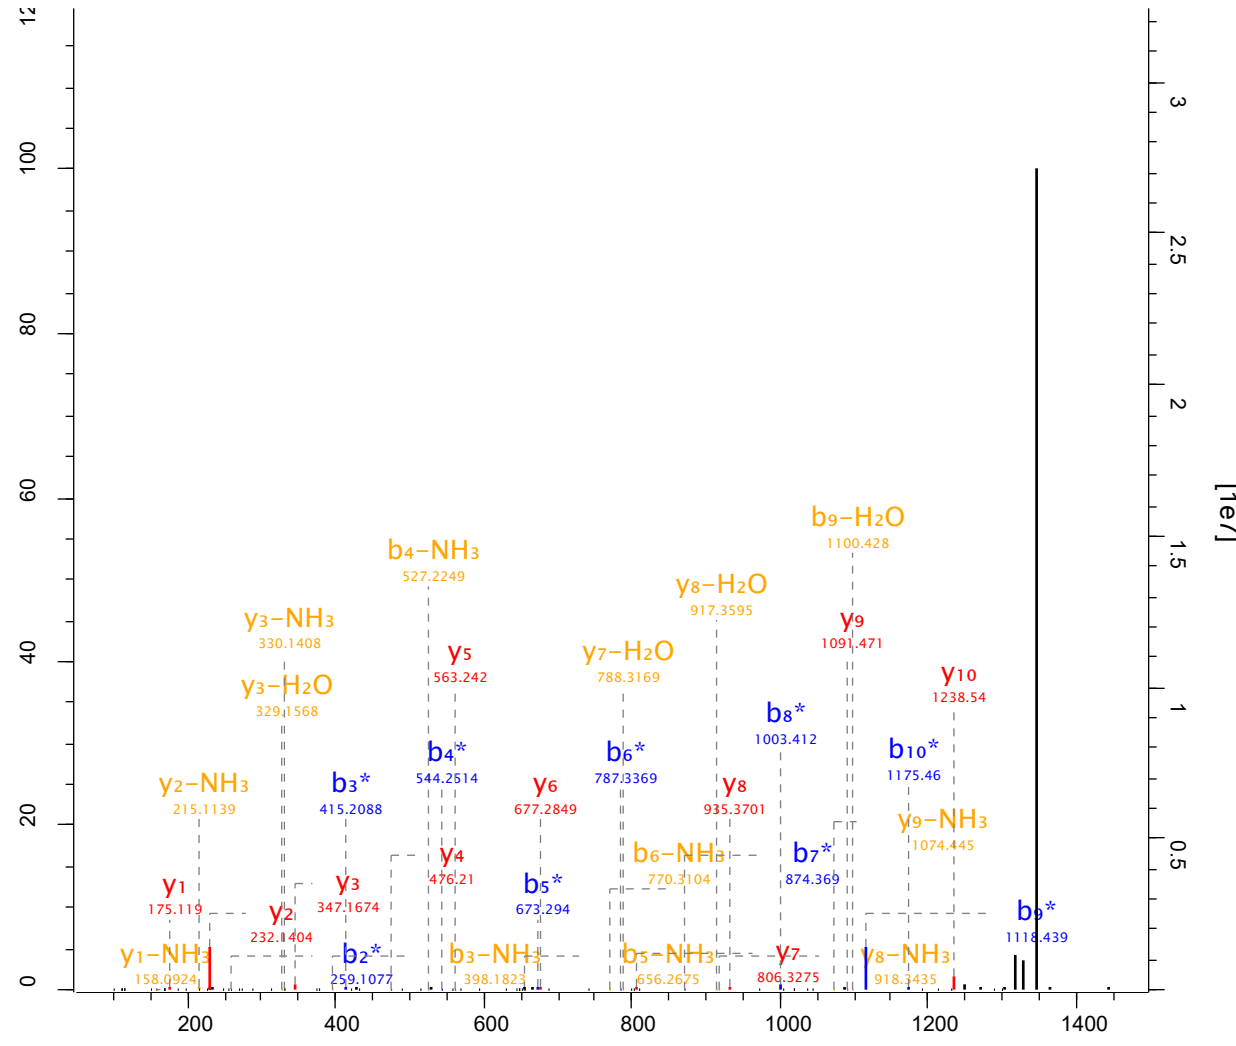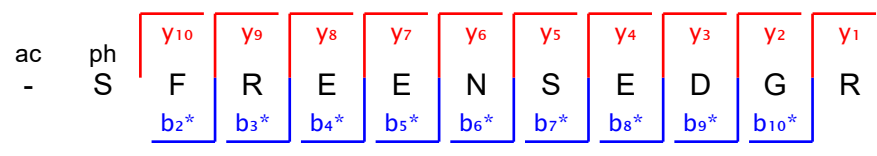

Raw file Scan Method Score m/z  
 sys\_02\_2 10839 FTMS; HCD 190.35 675.94

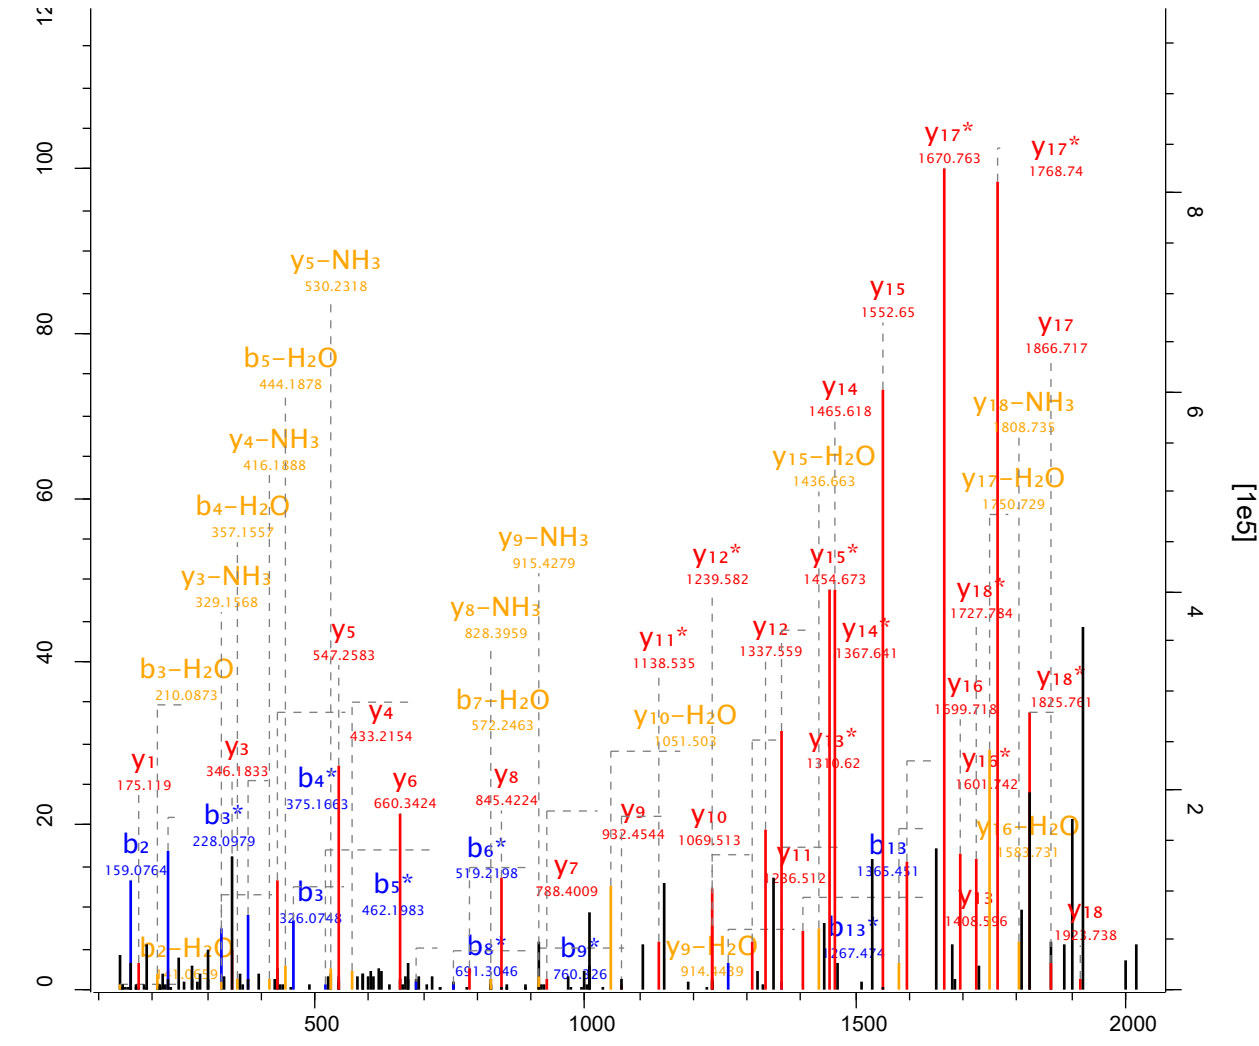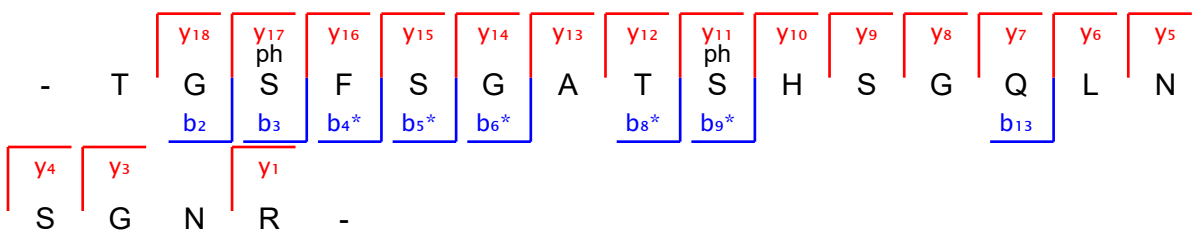

Raw file Scan Method Score m/z  
 sys\_02\_2 10970 FTMS; HCD 230.41 440.72

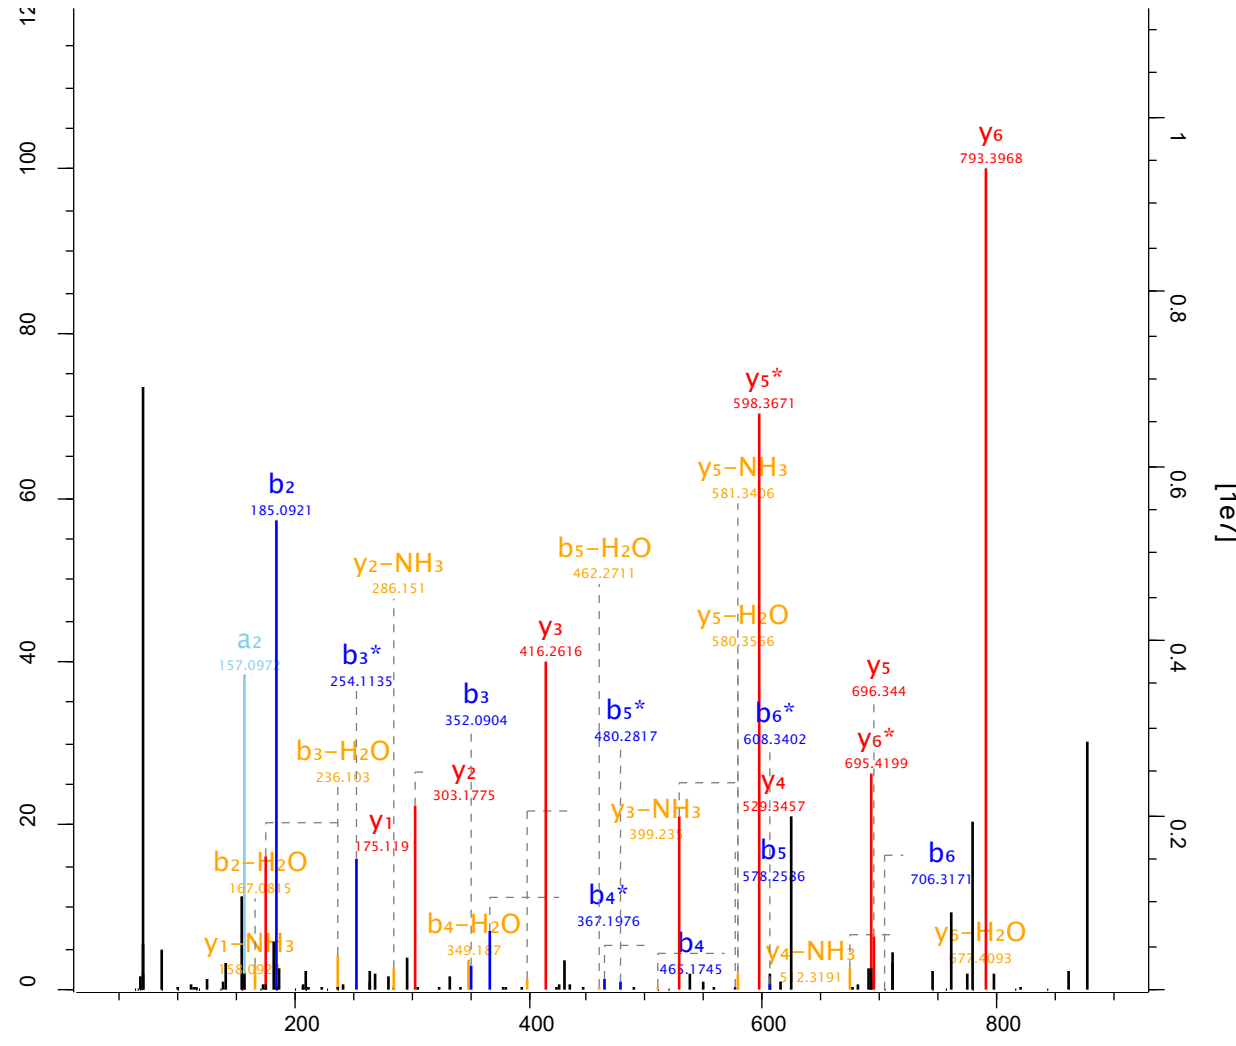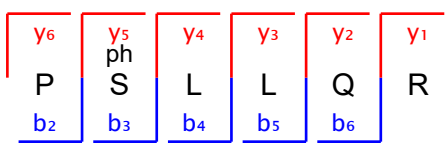



Raw file Scan Method Score m/z  
 sys\_02\_2 10983 FTMS; HCD 47.62 576.75

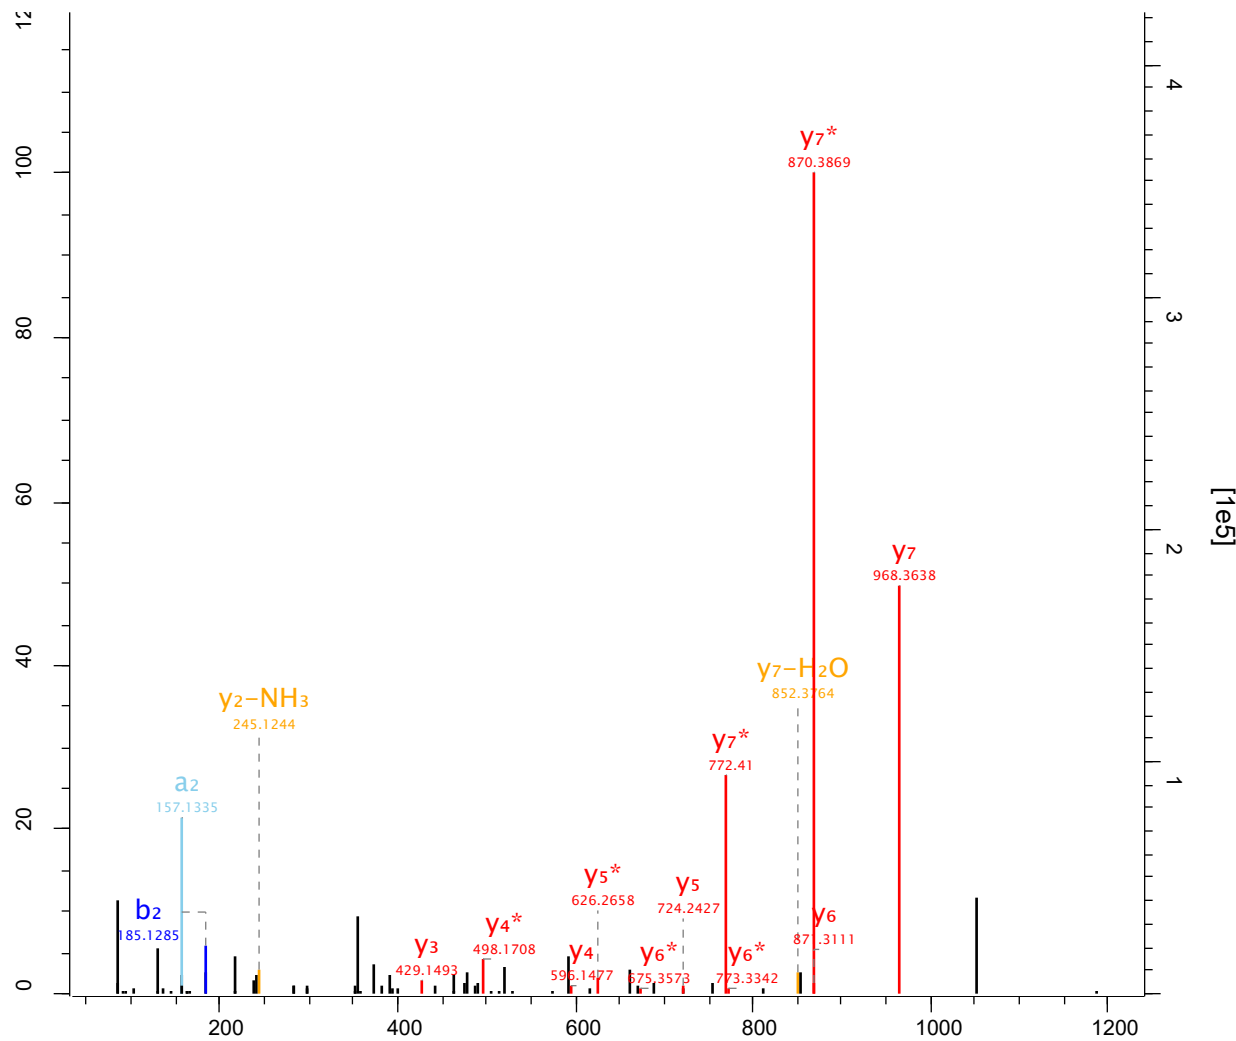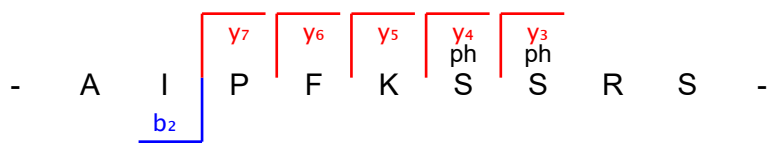

Raw file Scan Method Score m/z  
 sys\_02\_2 11014 FTMS; HCD 84.61 412.21

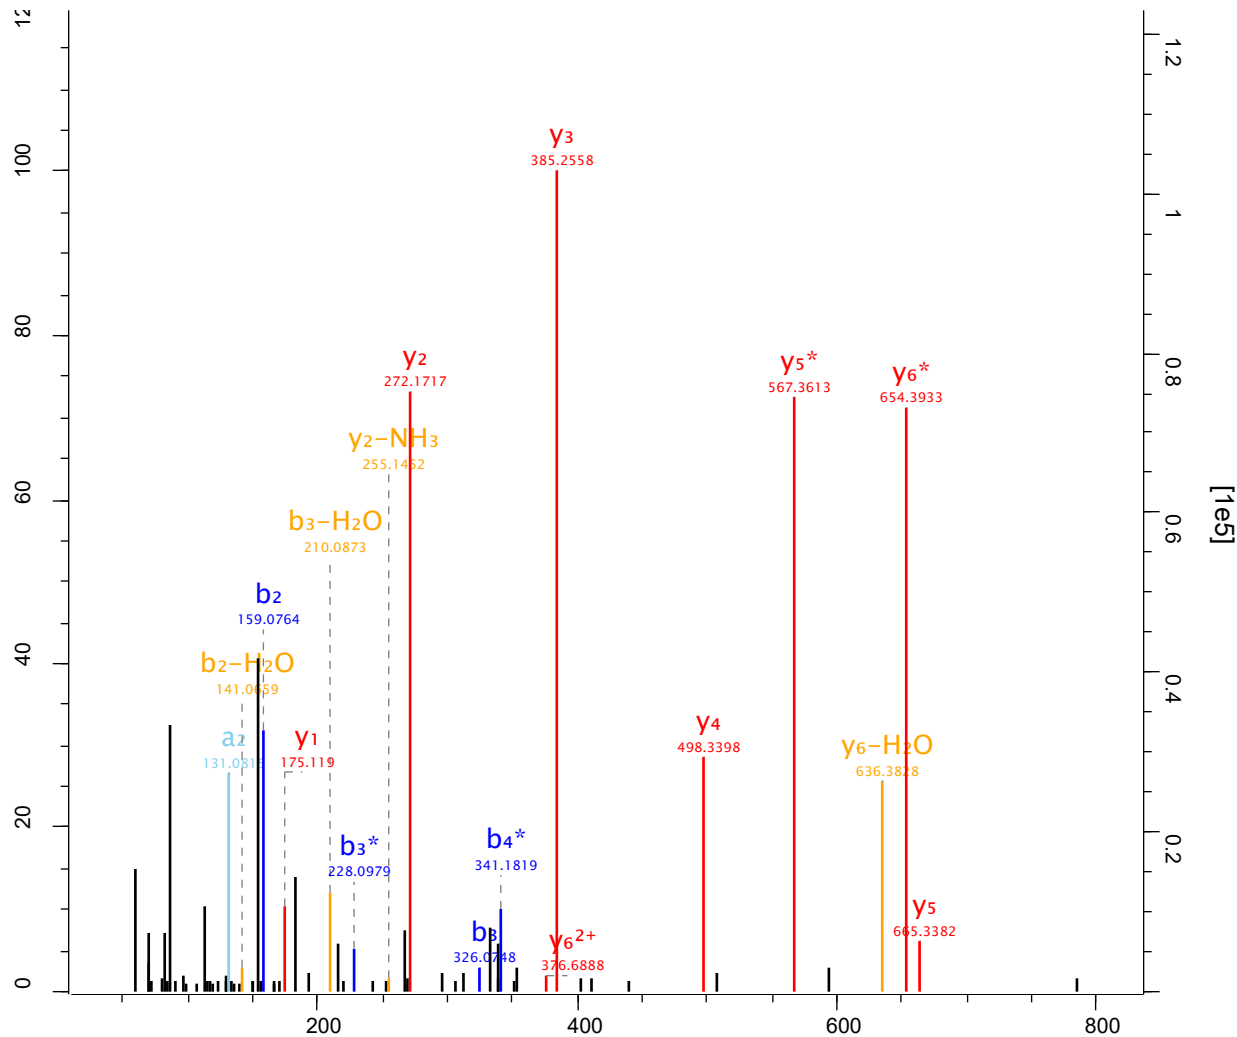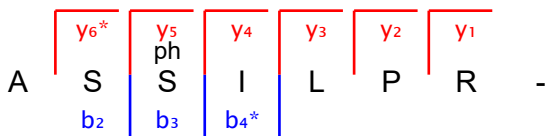

Raw file Scan Method Score m/z  
 sys\_02\_2 11367 FTMS; HCD 196.37 678.3

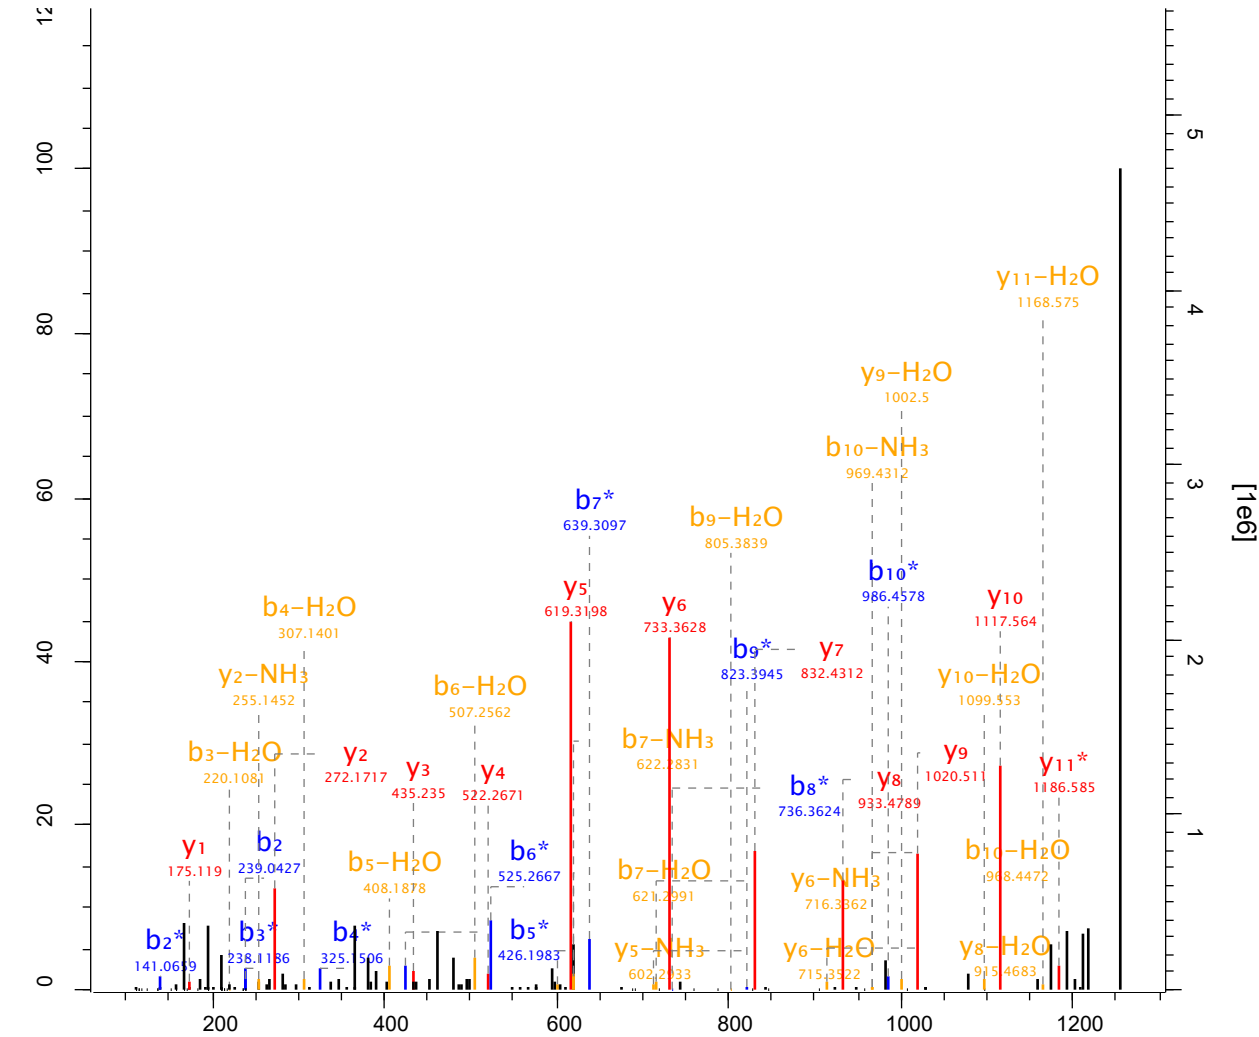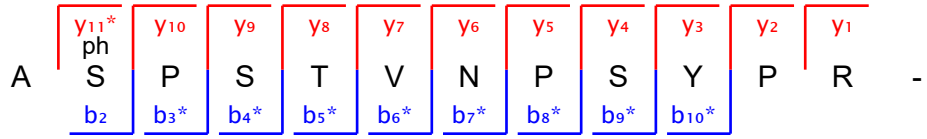

Raw file Scan Method Score m/z  
 sys\_02\_2 11426 FTMS; HCD 46.89 496.25

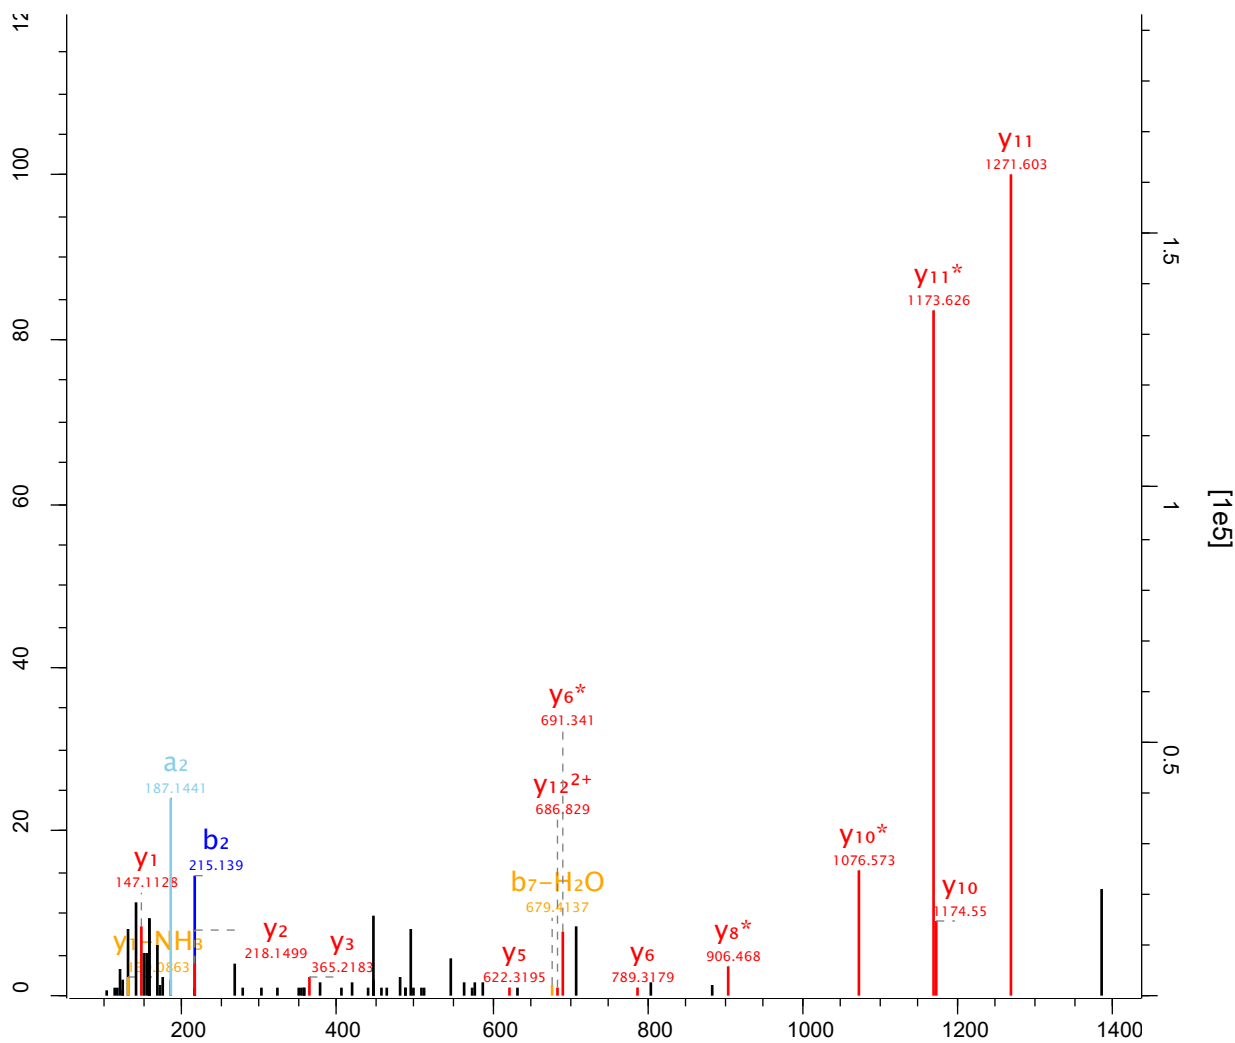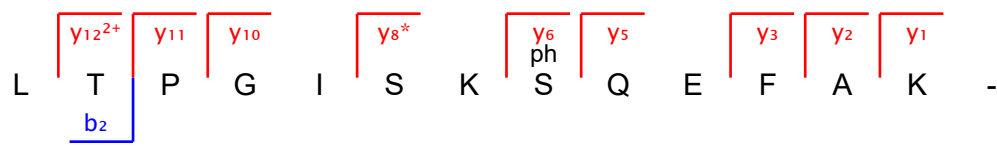

Raw file Scan Method Score m/z  
 sys\_02\_2 11489 FTMS; HCD 99.34 627.6

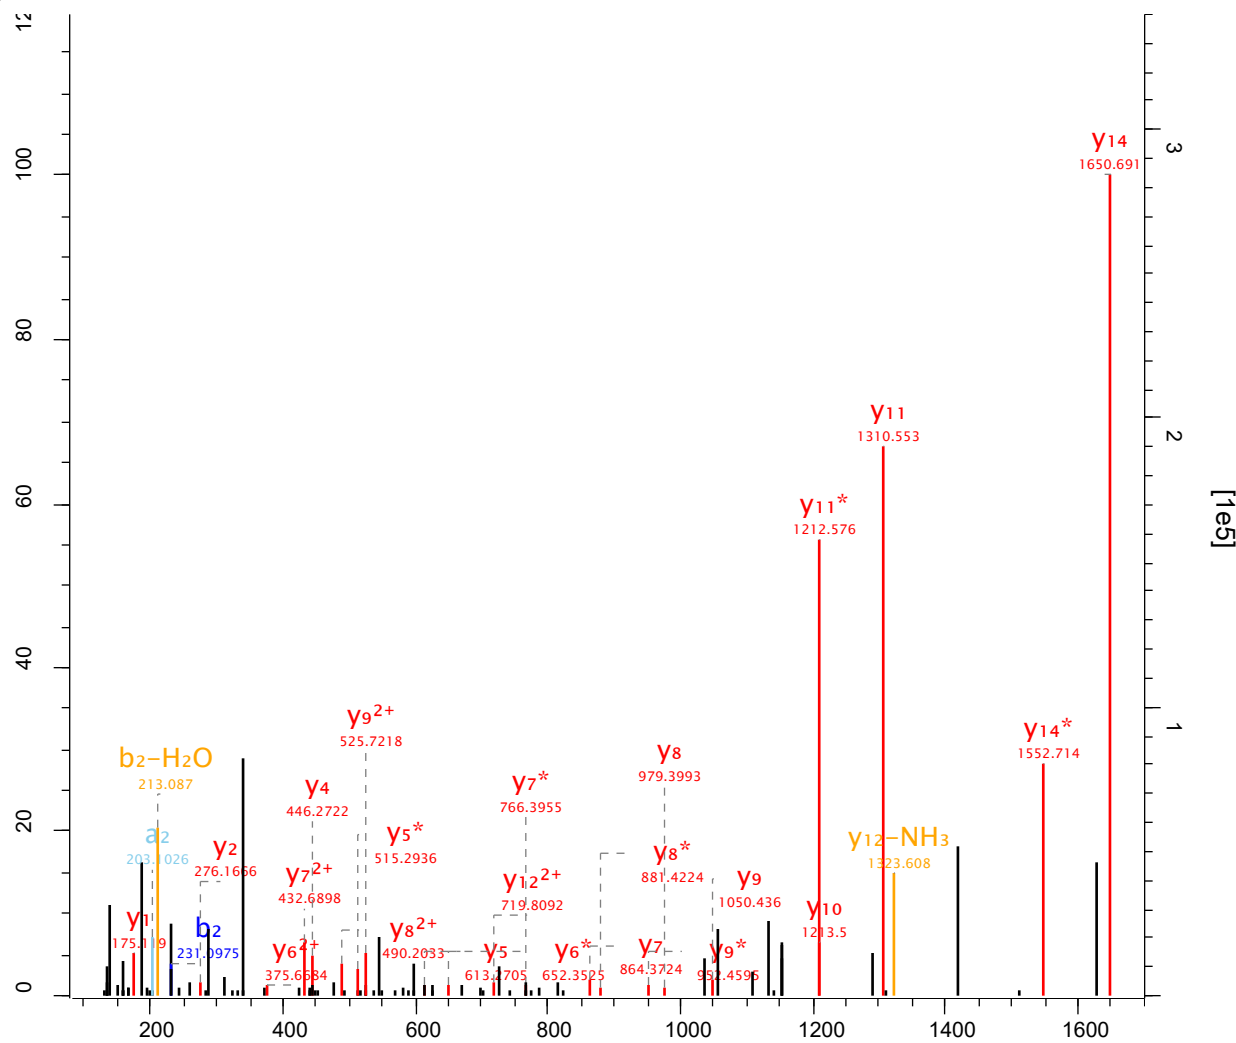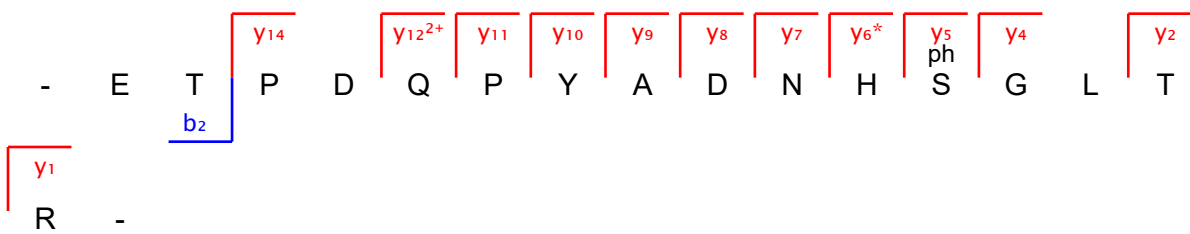

Raw file Scan Method Score m/z  
 sys\_02\_2 11522 FTMS; HCD 51.52 540.94

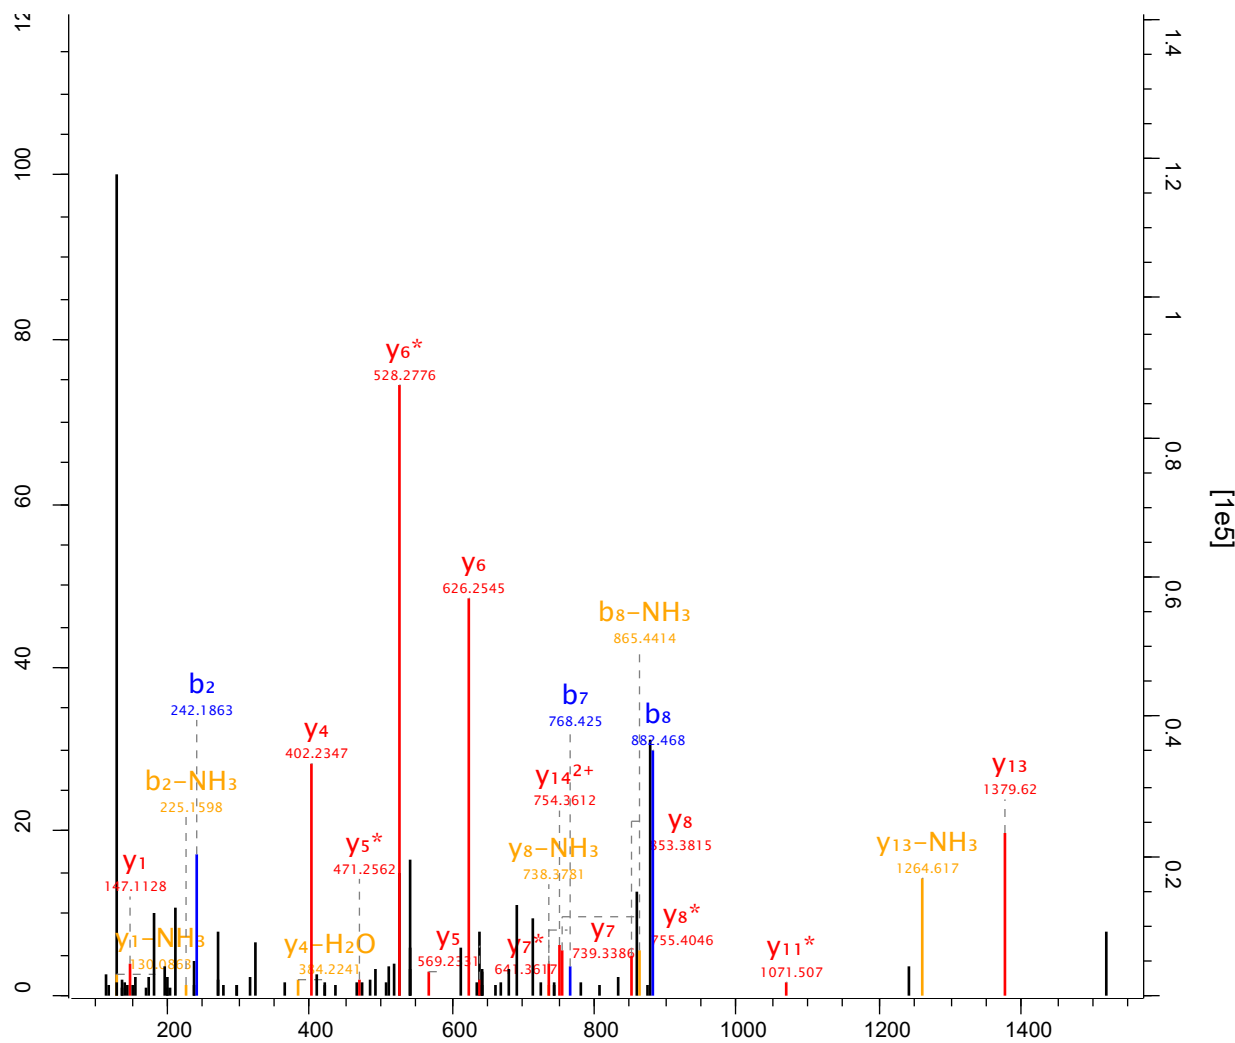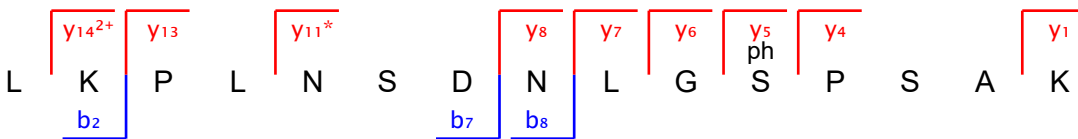

Raw file Scan Method Score m/z  
 sys\_02\_2 11567 FTMS; HCD 72.89 625.3

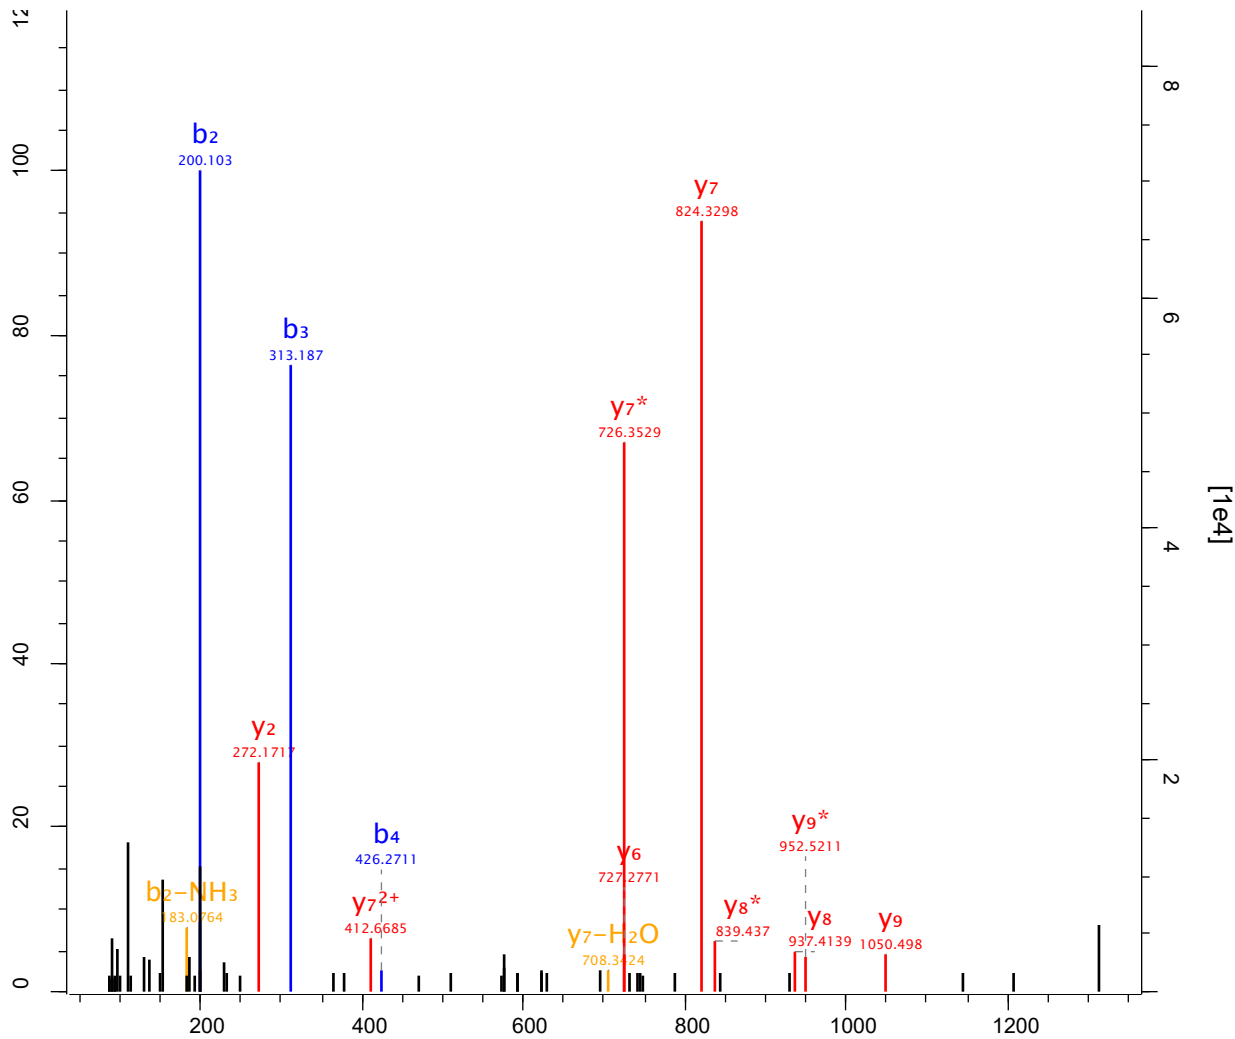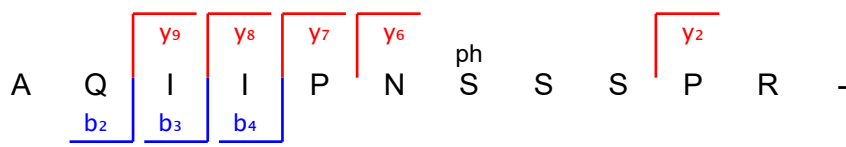

Raw file Scan Method Score m/z  
 sys\_02\_2 11568 FTMS; HCD 52.81 614.96

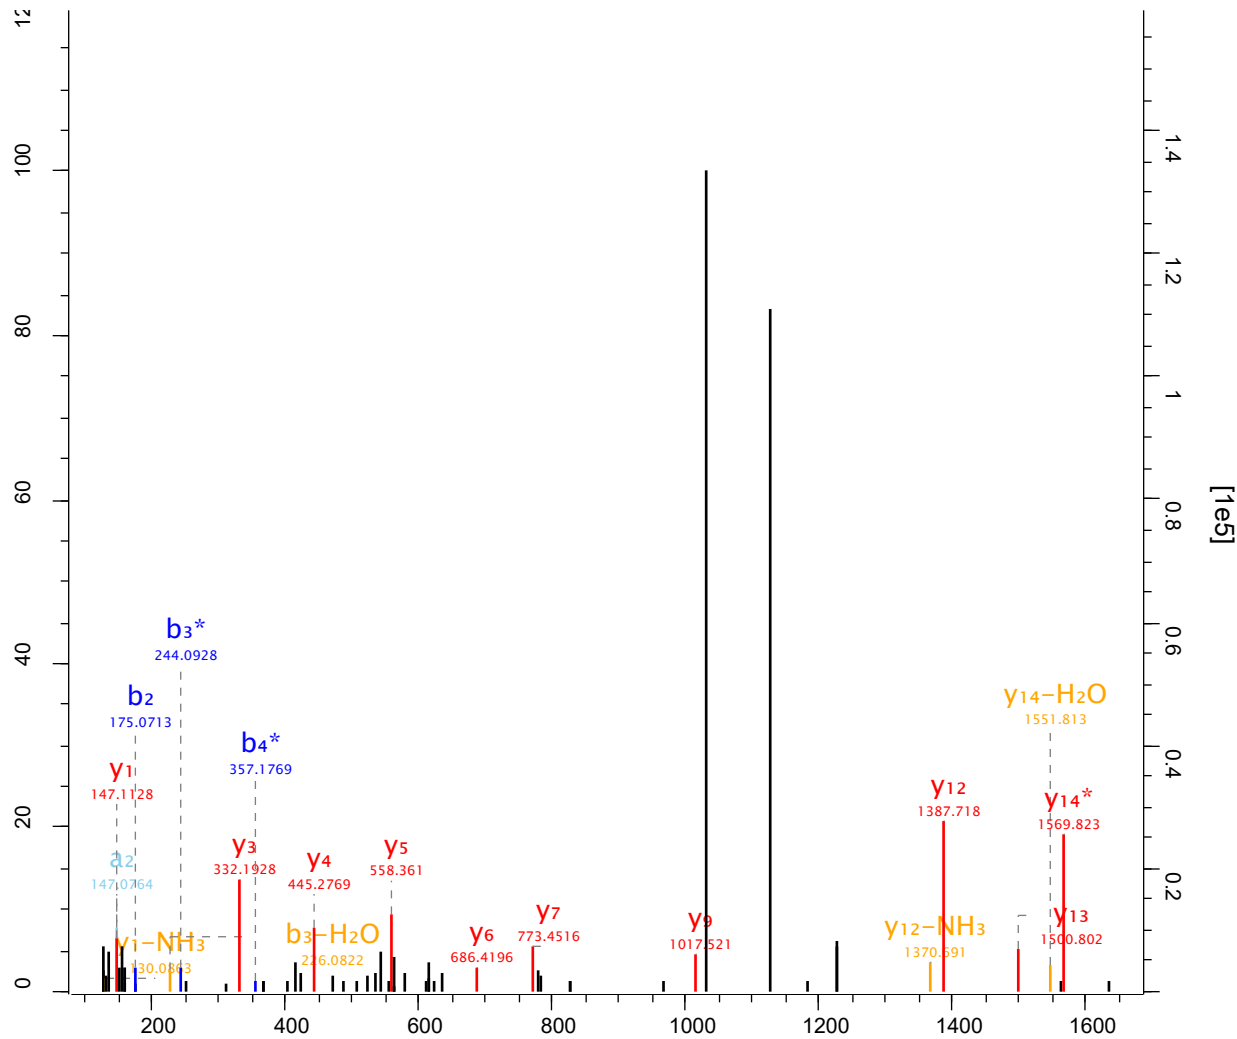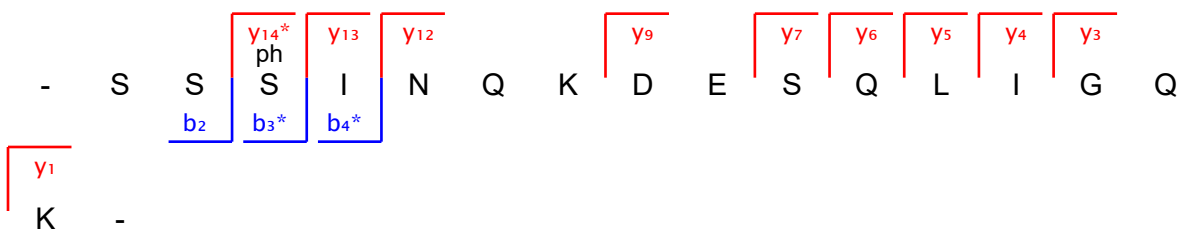



Raw file Scan Method Score m/z  
 sys\_02\_2 11613 FTMS; HCD 44.25 835.35

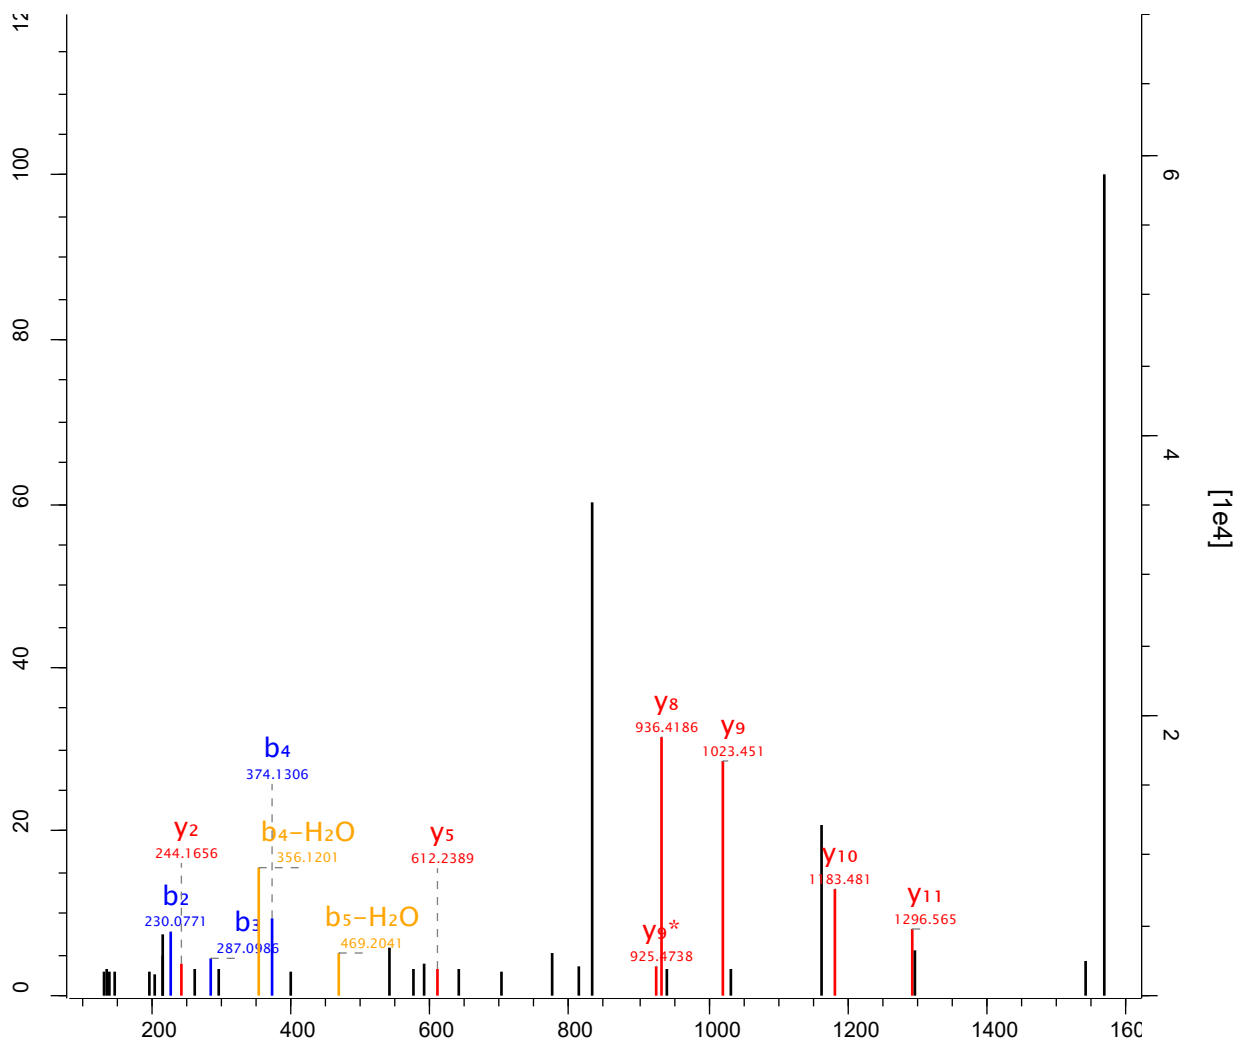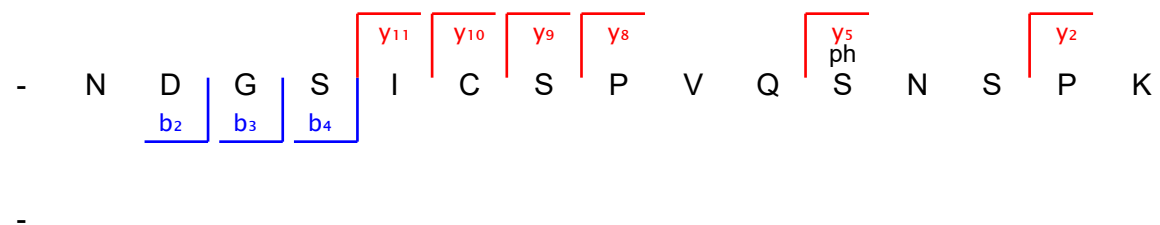

Raw file Scan Method Score m/z  
 sys\_02\_2 11616 FTMS; HCD 77.42 665.79

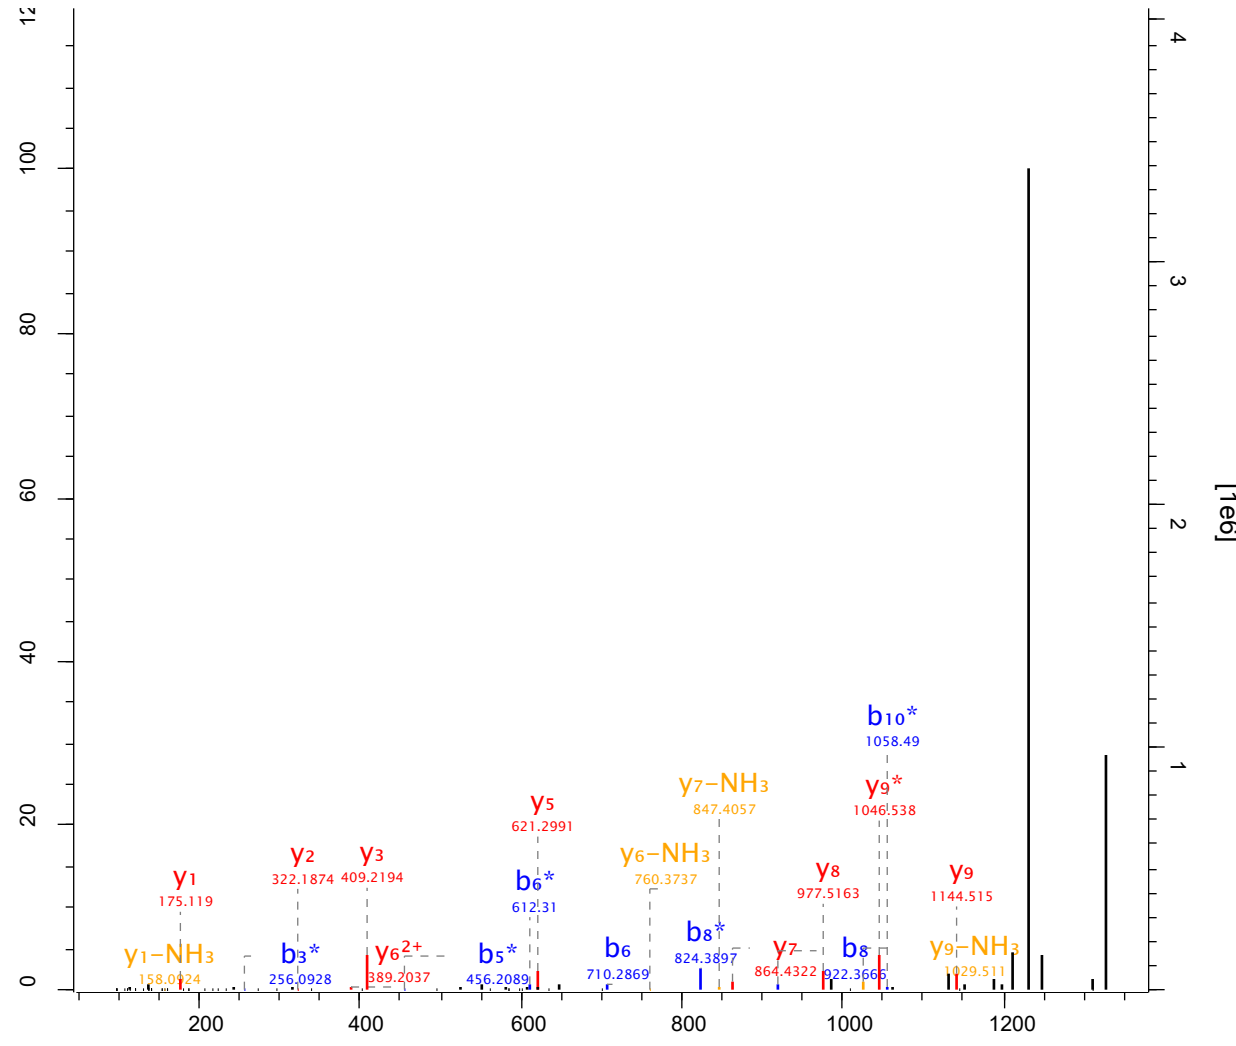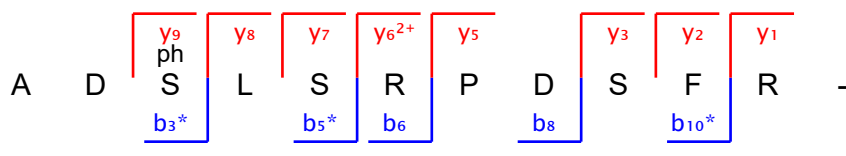

Raw file Scan Method Score m/z  
 sys\_02\_2 11700 FTMS; HCD 56.96 536.26

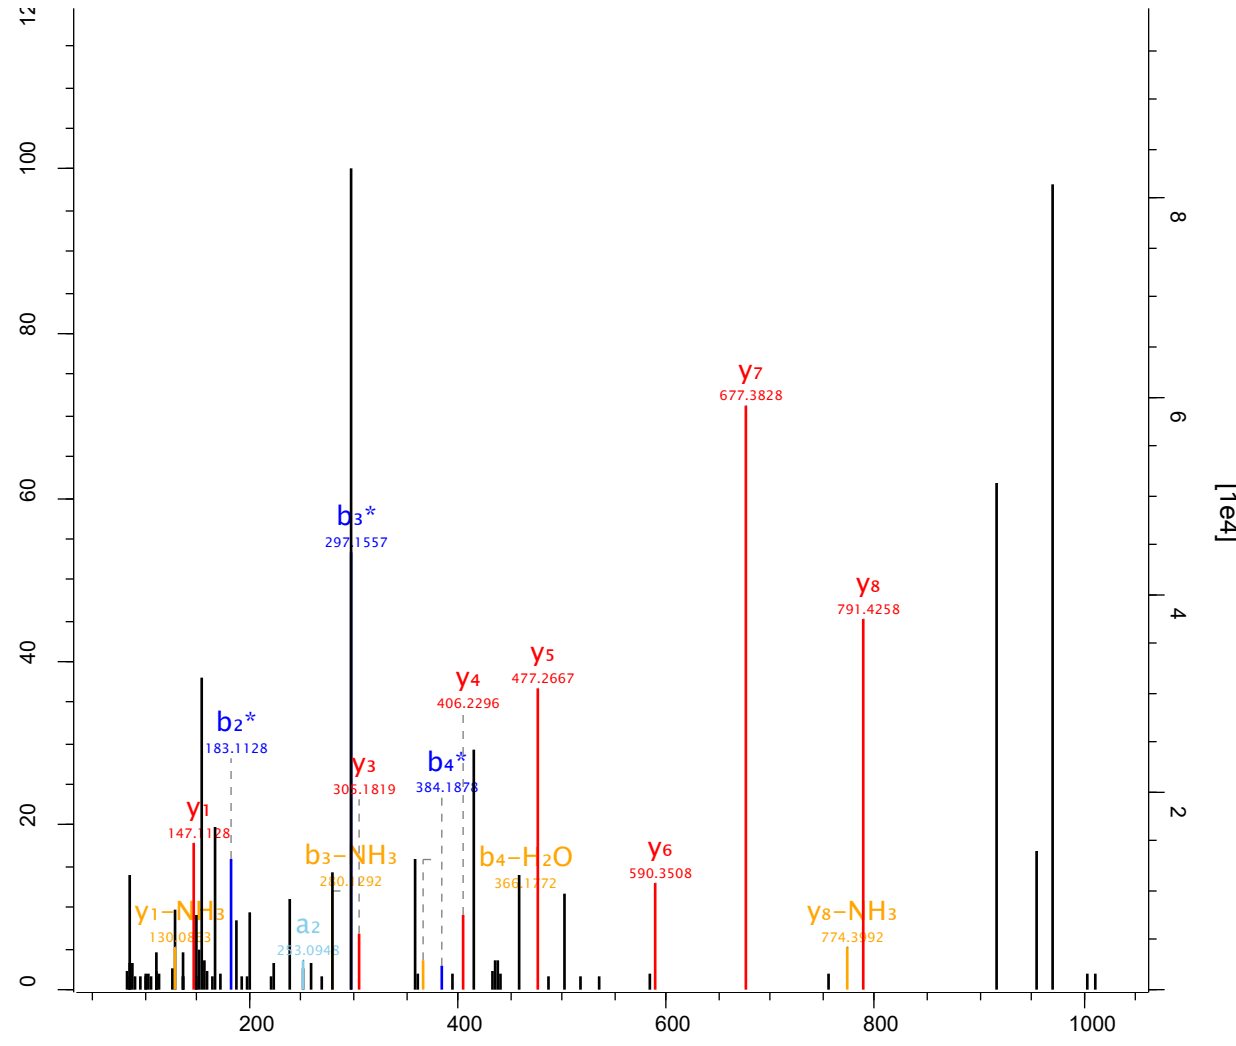

ph S L N S L A T G T K -  
 b2\* b3\* b4\*

Raw file Scan Method Score m/z  
 sys\_02\_2 11732 FTMS; HCD 42.31 546.25

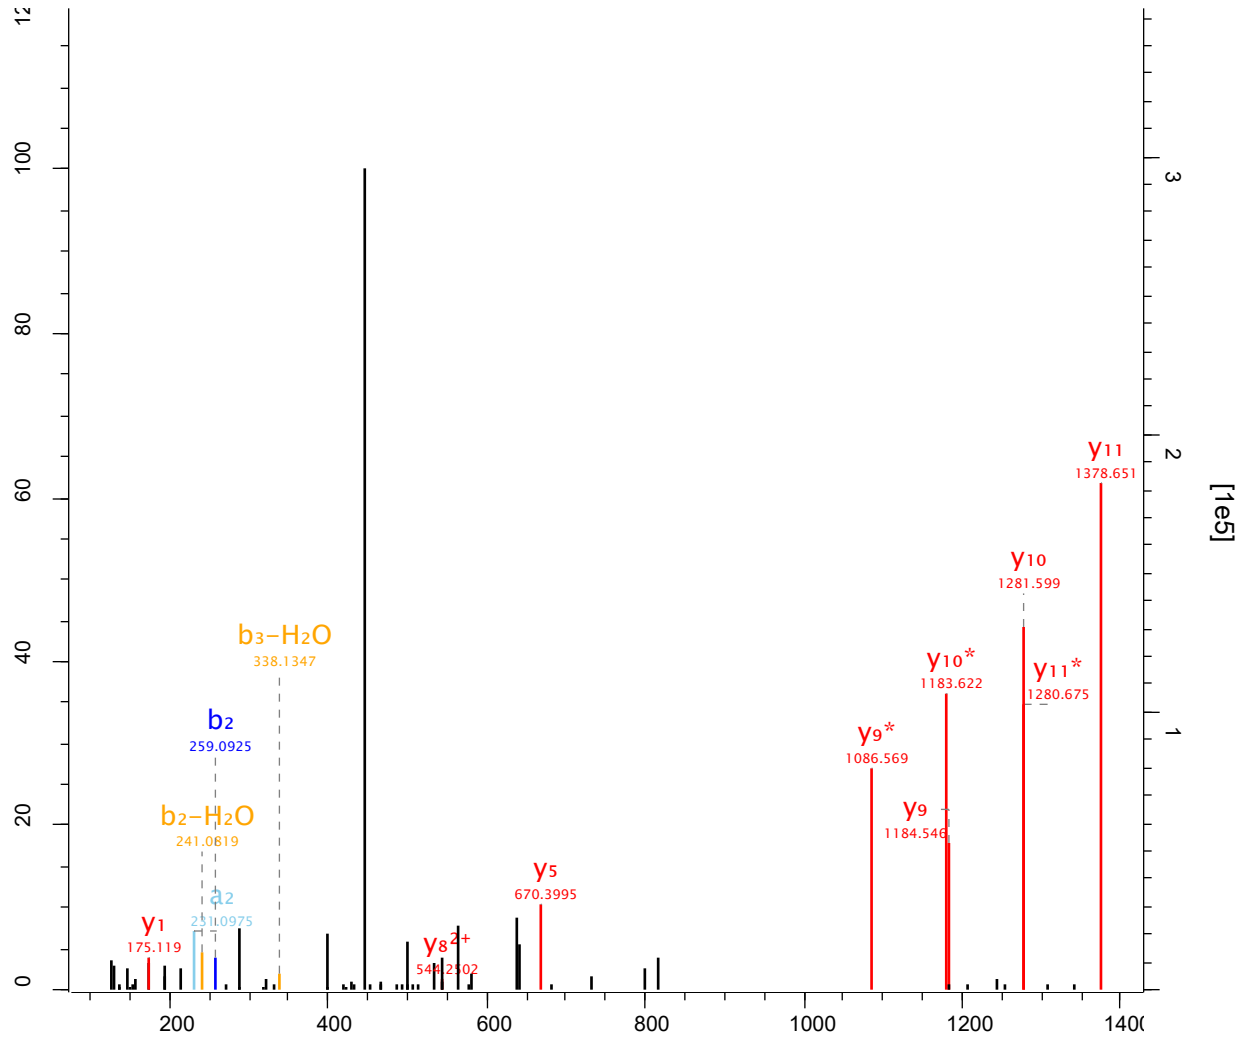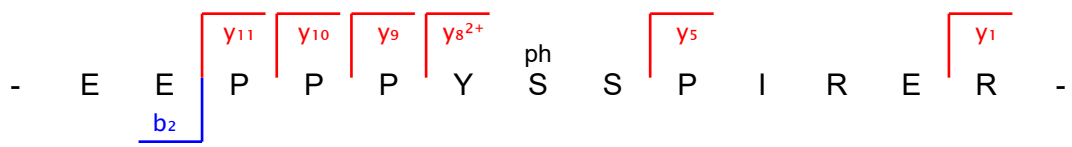

Raw file Scan Method Score m/z  
 sys\_02\_2 11778 FTMS; HCD 138.91 672.29

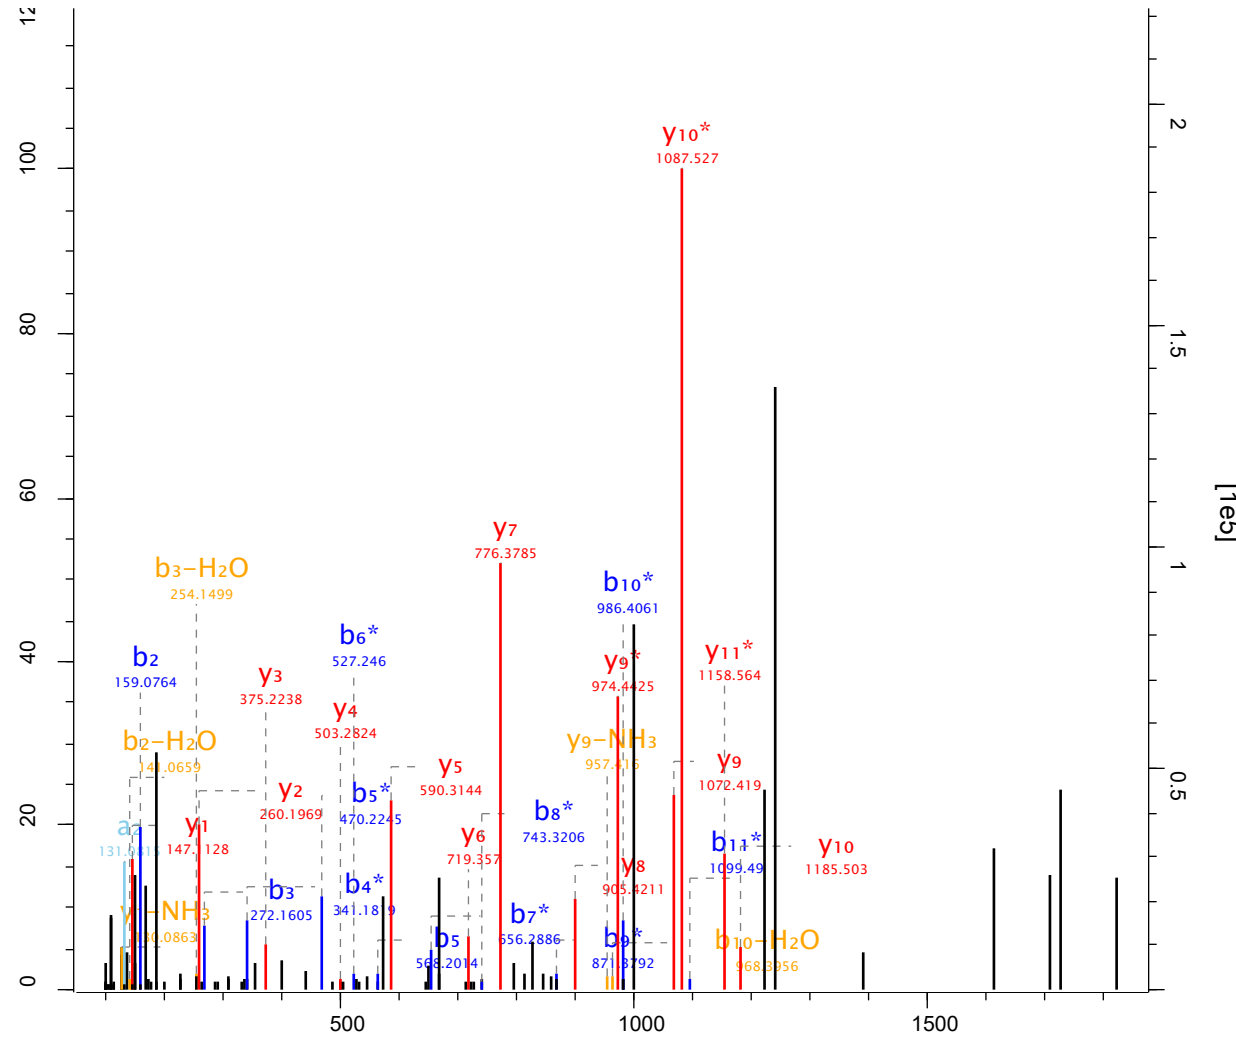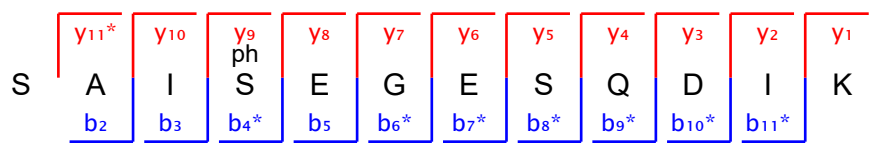

Raw file Scan Method Score m/z  
 sys\_02\_2 11962 FTMS; HCD 56.72 535.25

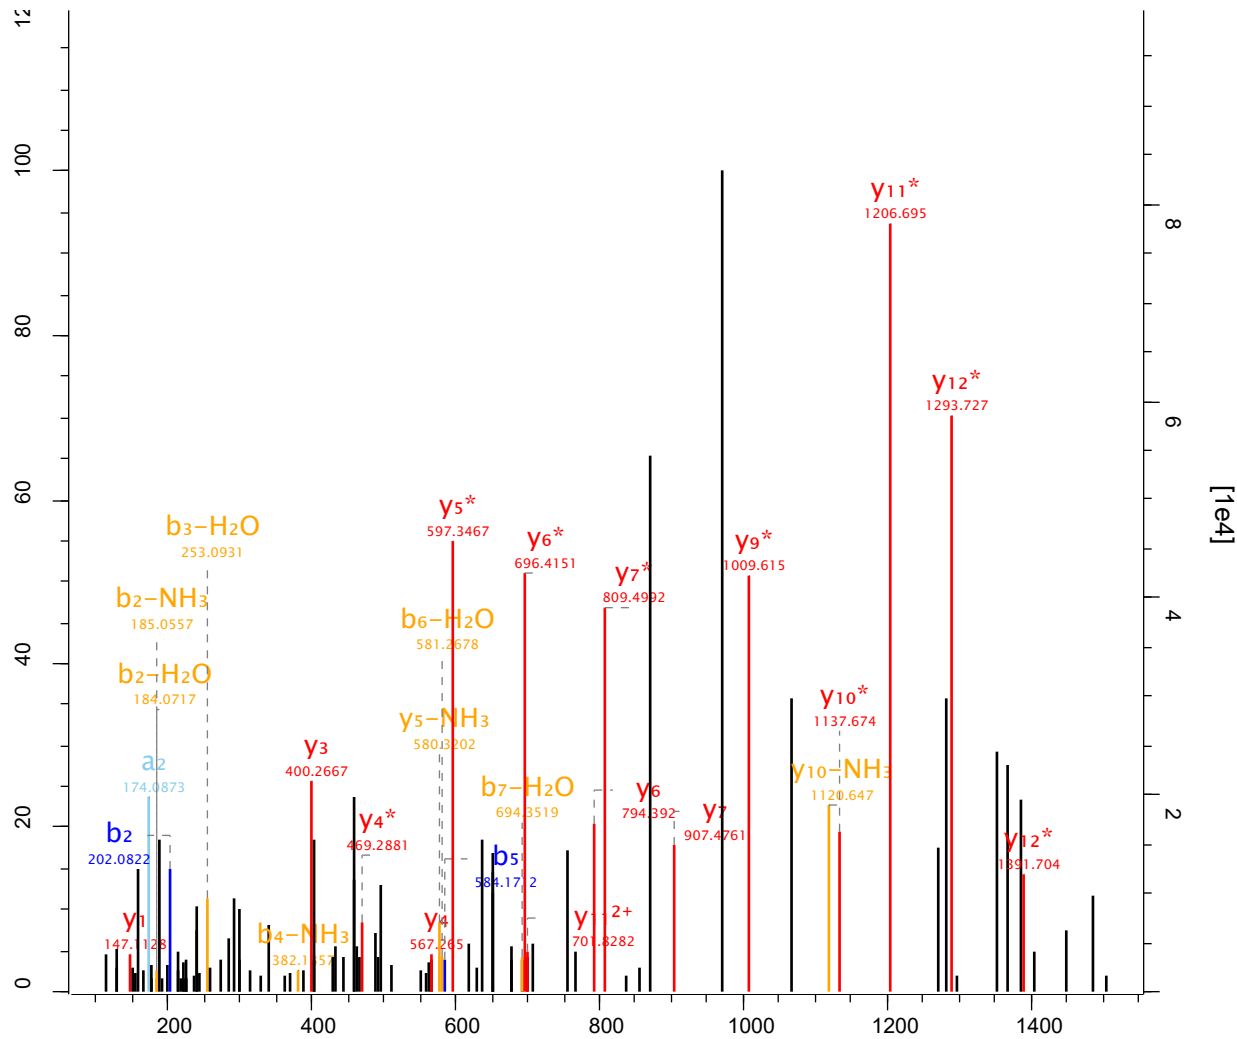

- N S S Q S I L V Q S P R K -

Annotations: y<sub>12</sub>\* (S), y<sub>11</sub>\* (ph, S), y<sub>10</sub>\* (Q), y<sub>9</sub>\* (S), y<sub>7</sub> (L), y<sub>6</sub> (V), y<sub>5</sub>\* (Q), y<sub>4</sub> (ph, S), y<sub>3</sub> (P), y<sub>1</sub> (K). Blue boxes highlight b<sub>2</sub> (S) and b<sub>5</sub> (S).

Raw file sys\_02\_2 Scan 12020 Method FTMS; HCD Score 108.55 m/z 690.98

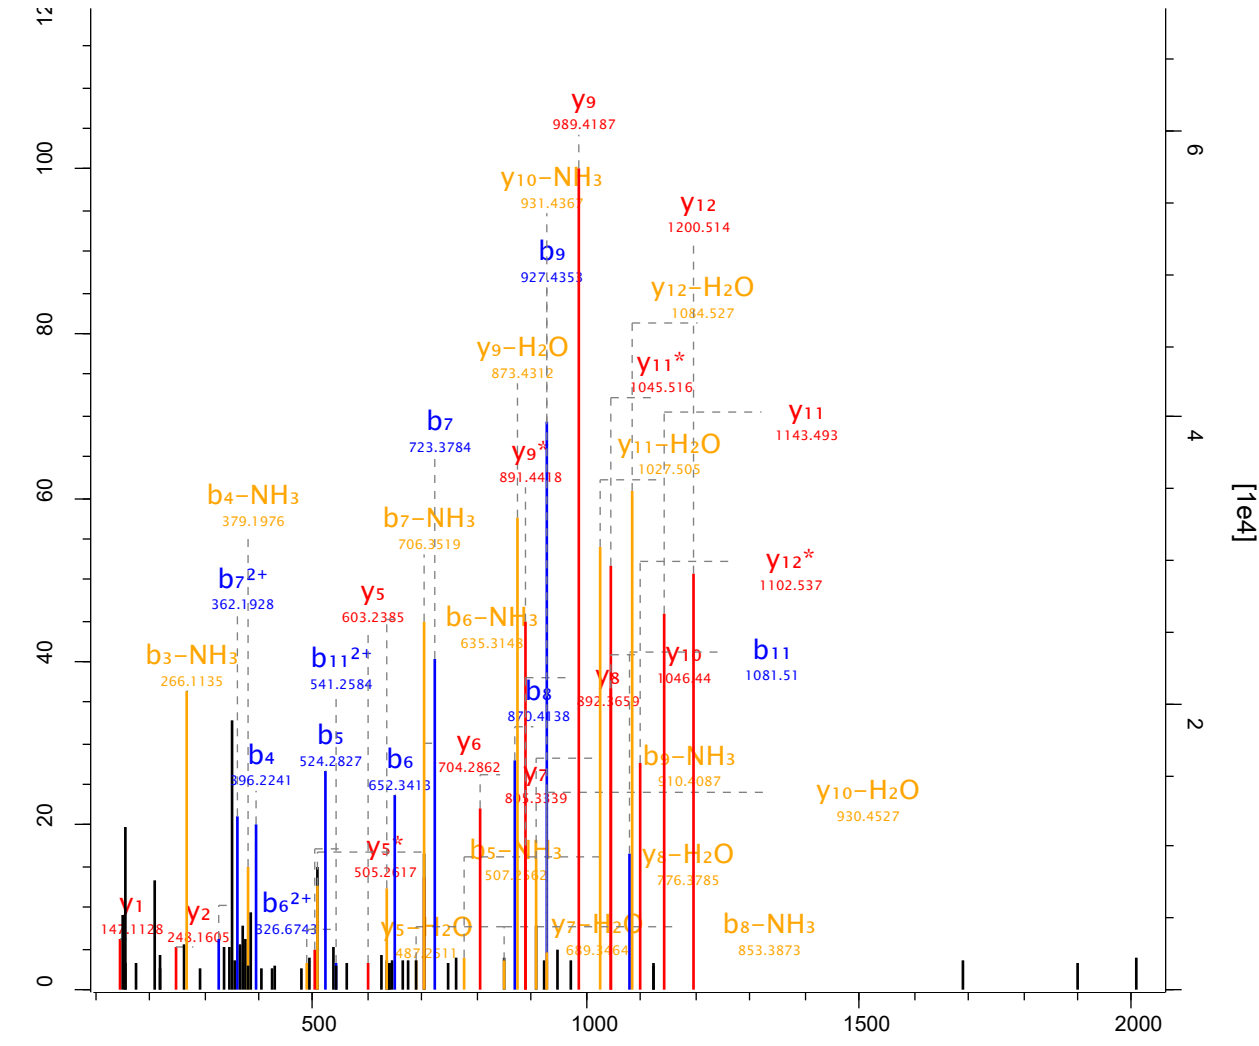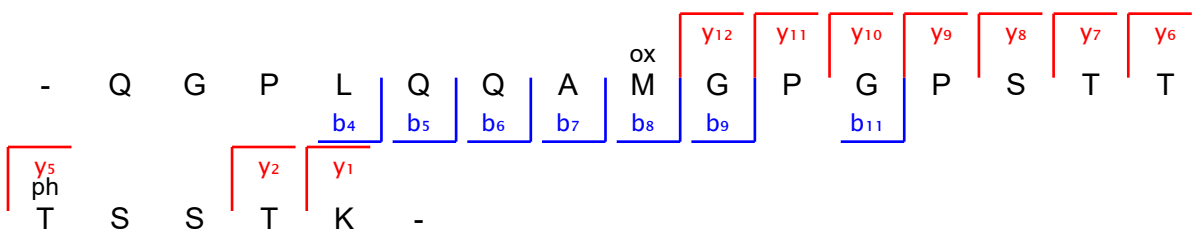

| Raw file | Scan  | Method    | Score | m/z    |
|----------|-------|-----------|-------|--------|
| sys_02_2 | 12390 | FTMS; HCD | 42.63 | 512.72 |

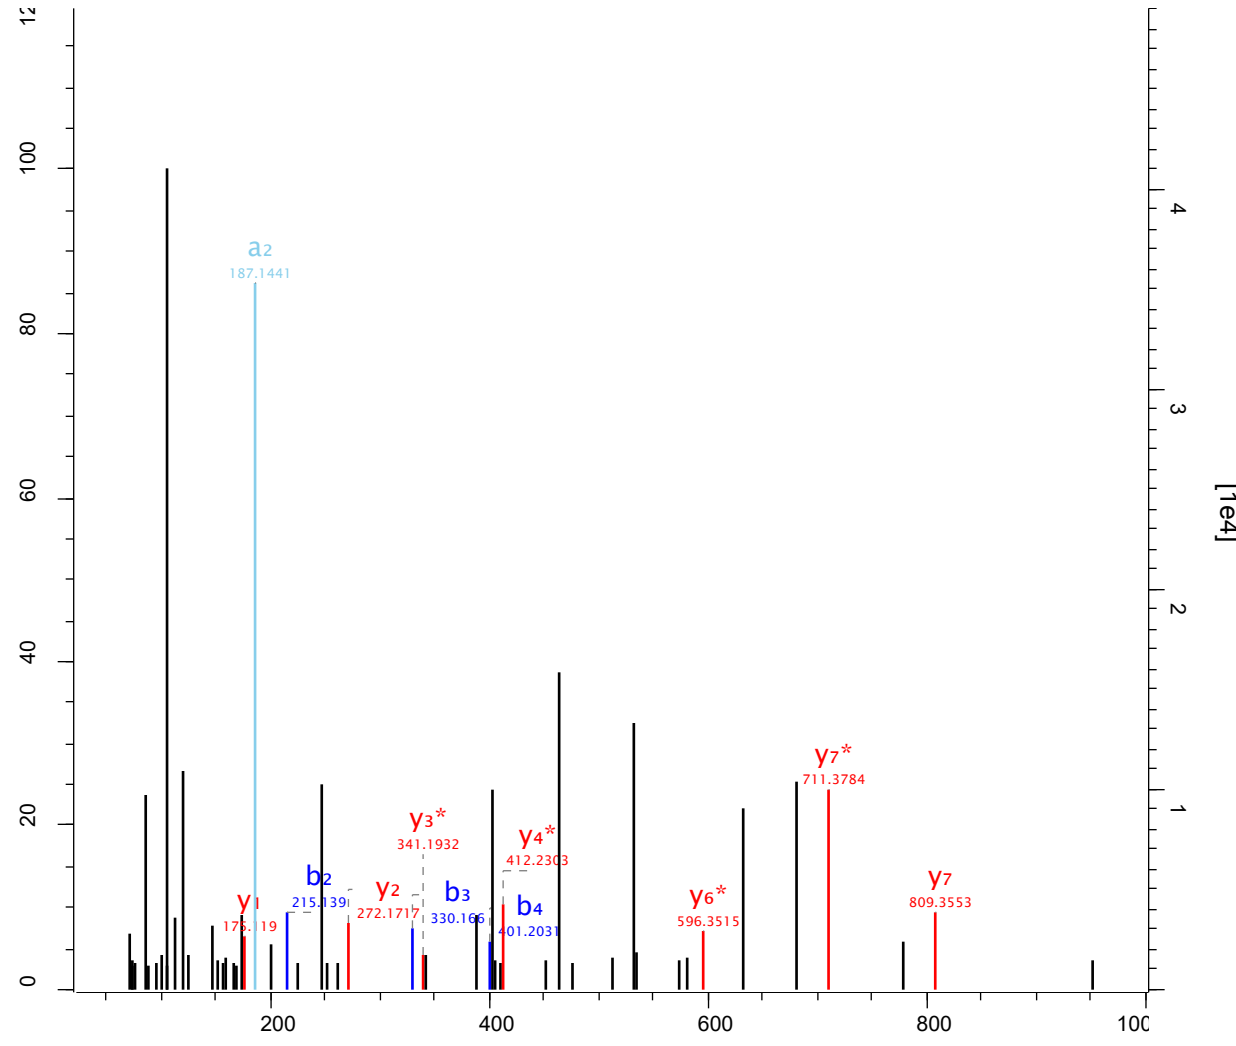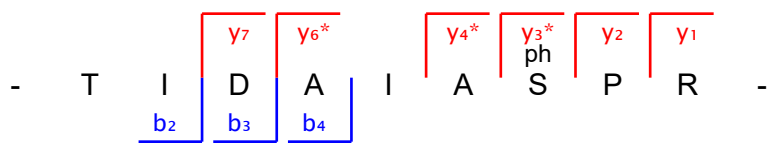



Raw file Scan Method Score m/z  
 sys\_02\_2 12400 FTMS; HCD 72.47 466.56

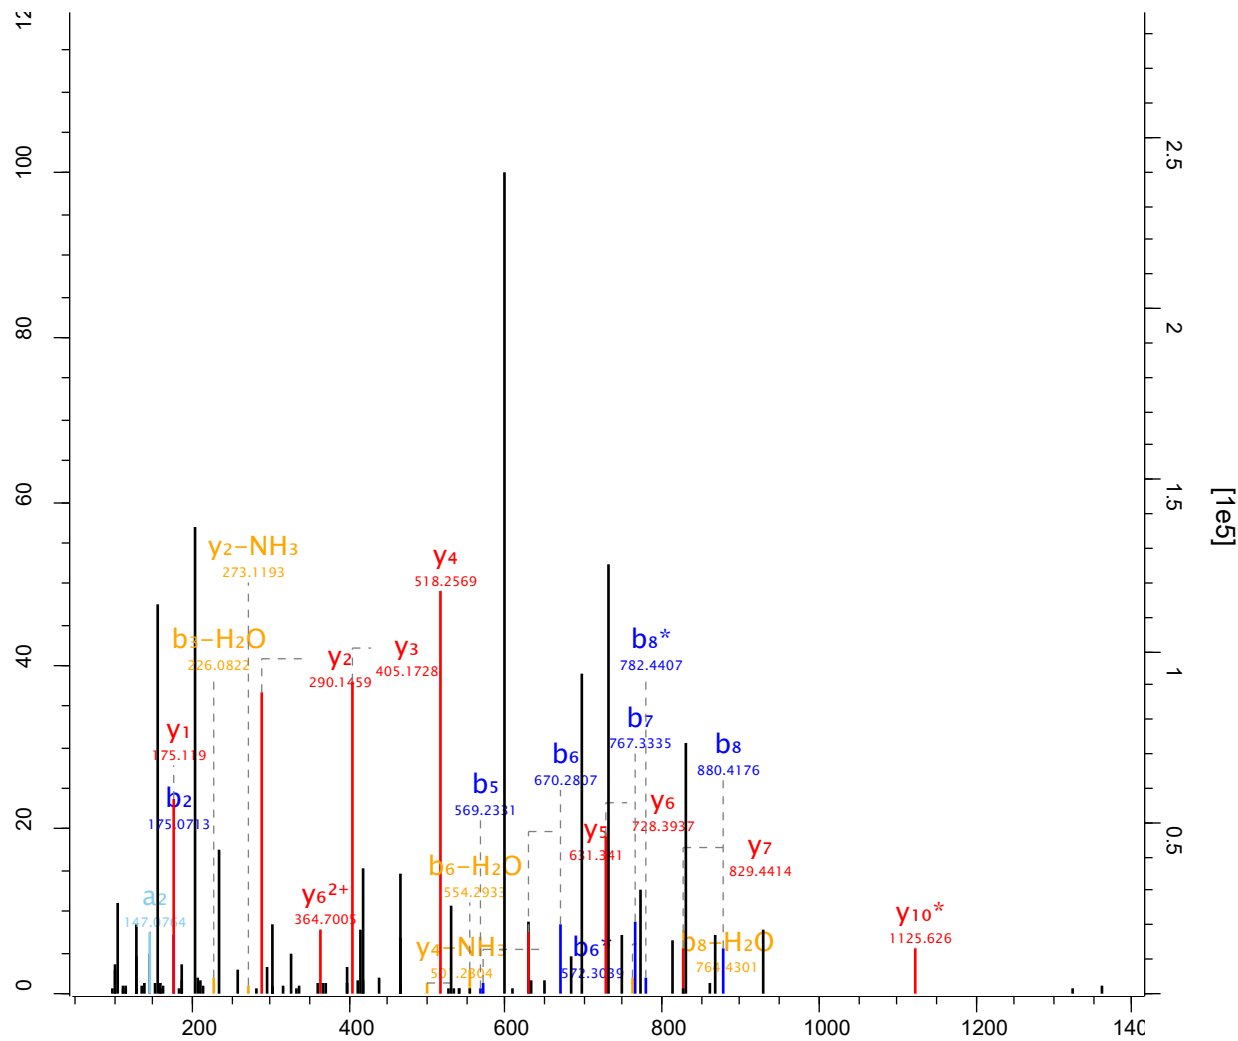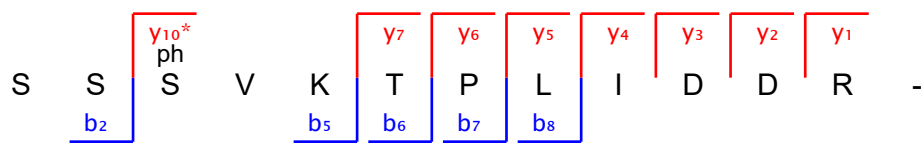

Raw file Scan Method Score m/z  
 sys\_02\_2 12582 FTMS; HCD 73.5 424.2

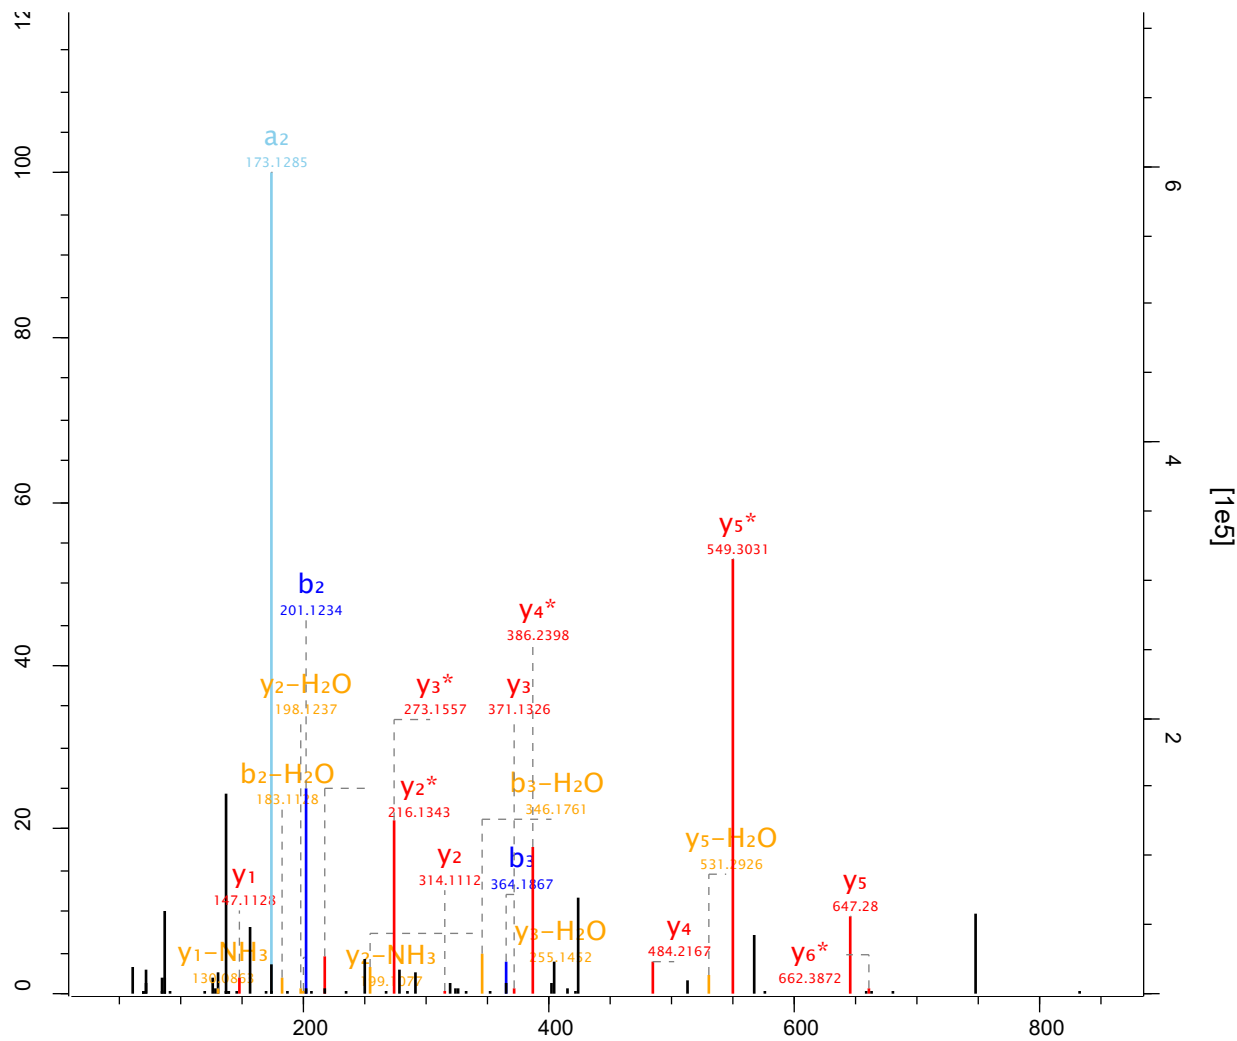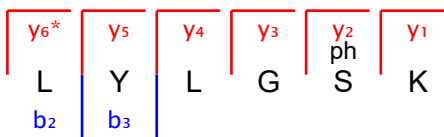

Raw file Scan Method Score m/z  
 sys\_02\_2 12986 FTMS; HCD 149.21 713.78

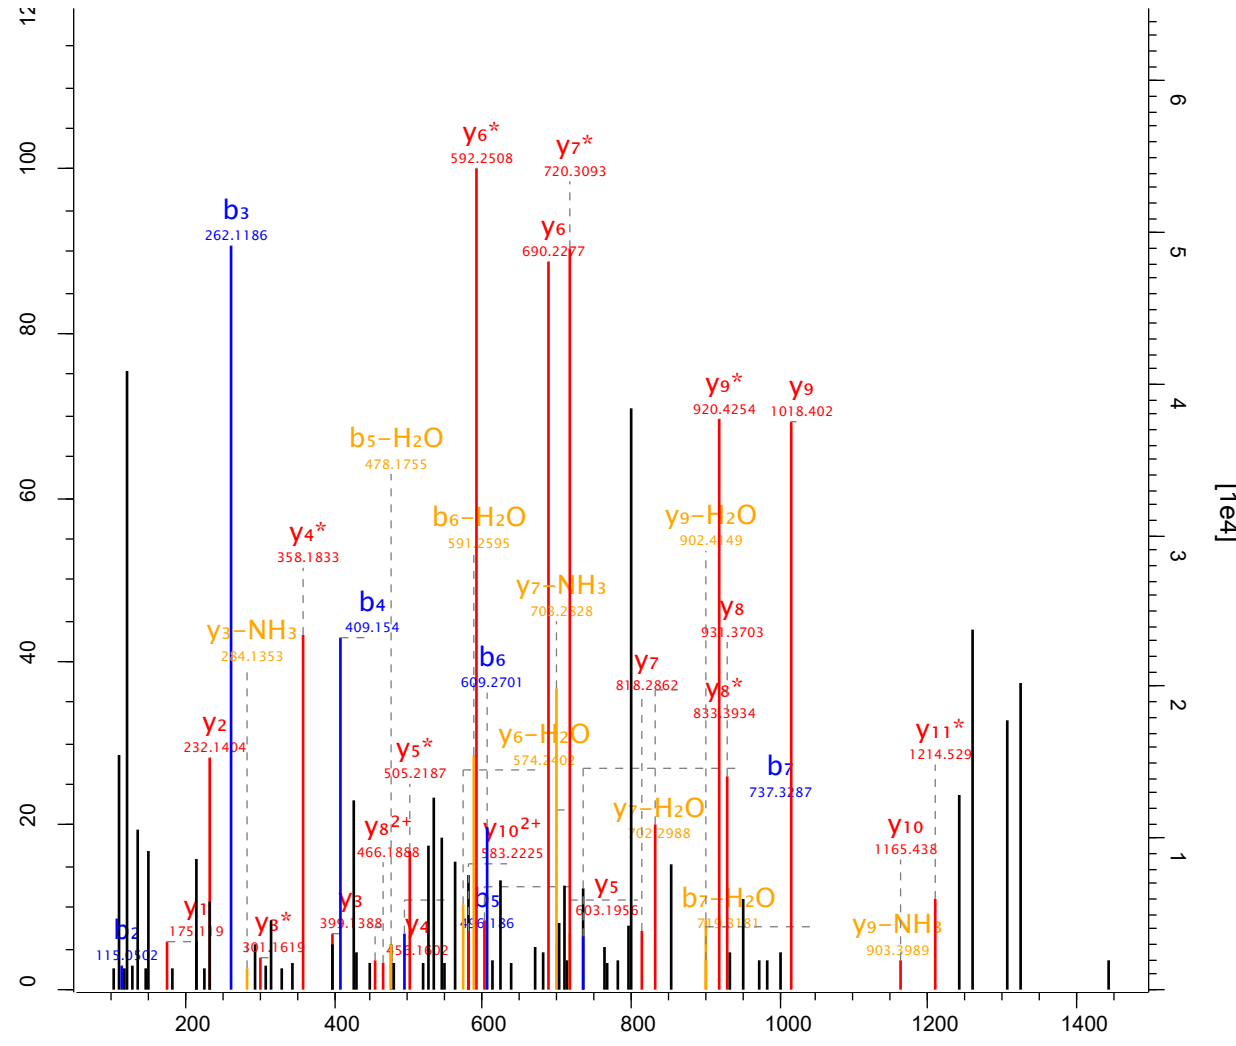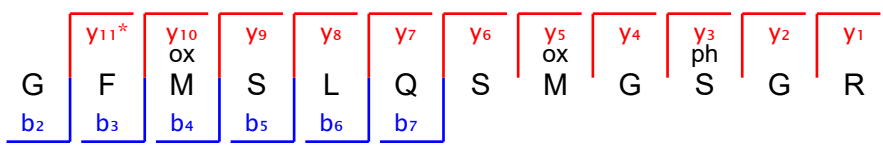

Raw file Scan Method Score m/z  
 sys\_02\_2 13005 FTMS; HCD 47.62 563.76

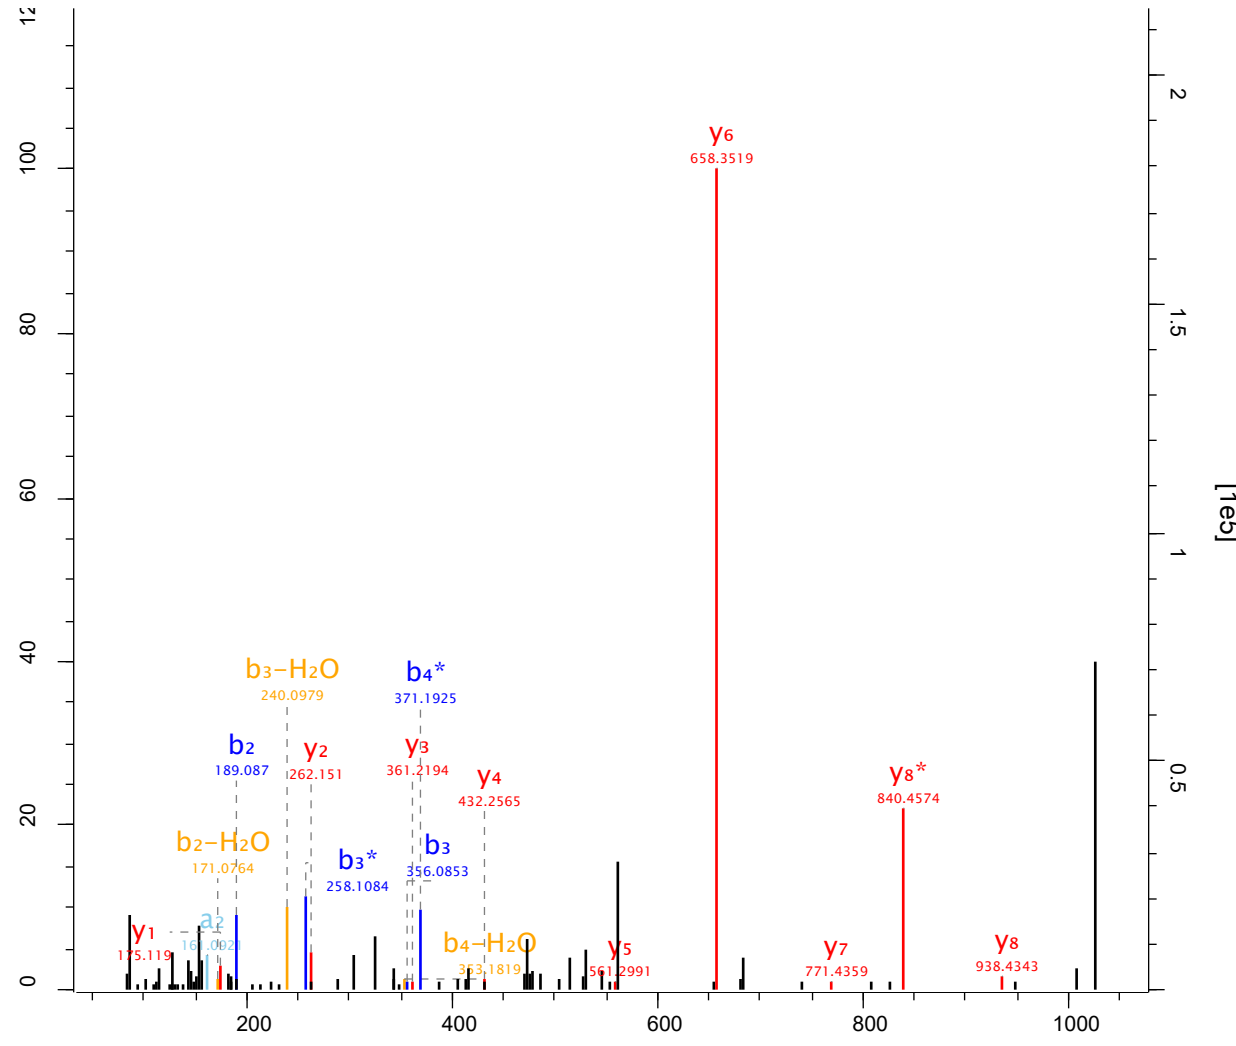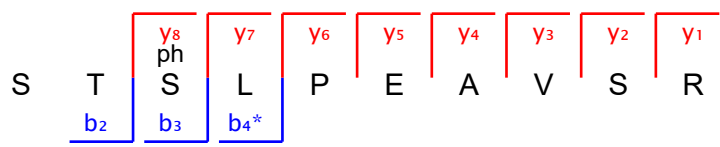

Raw file Scan Method Score m/z  
 sys\_02\_2 13044 FTMS; HCD 155.8 816.84

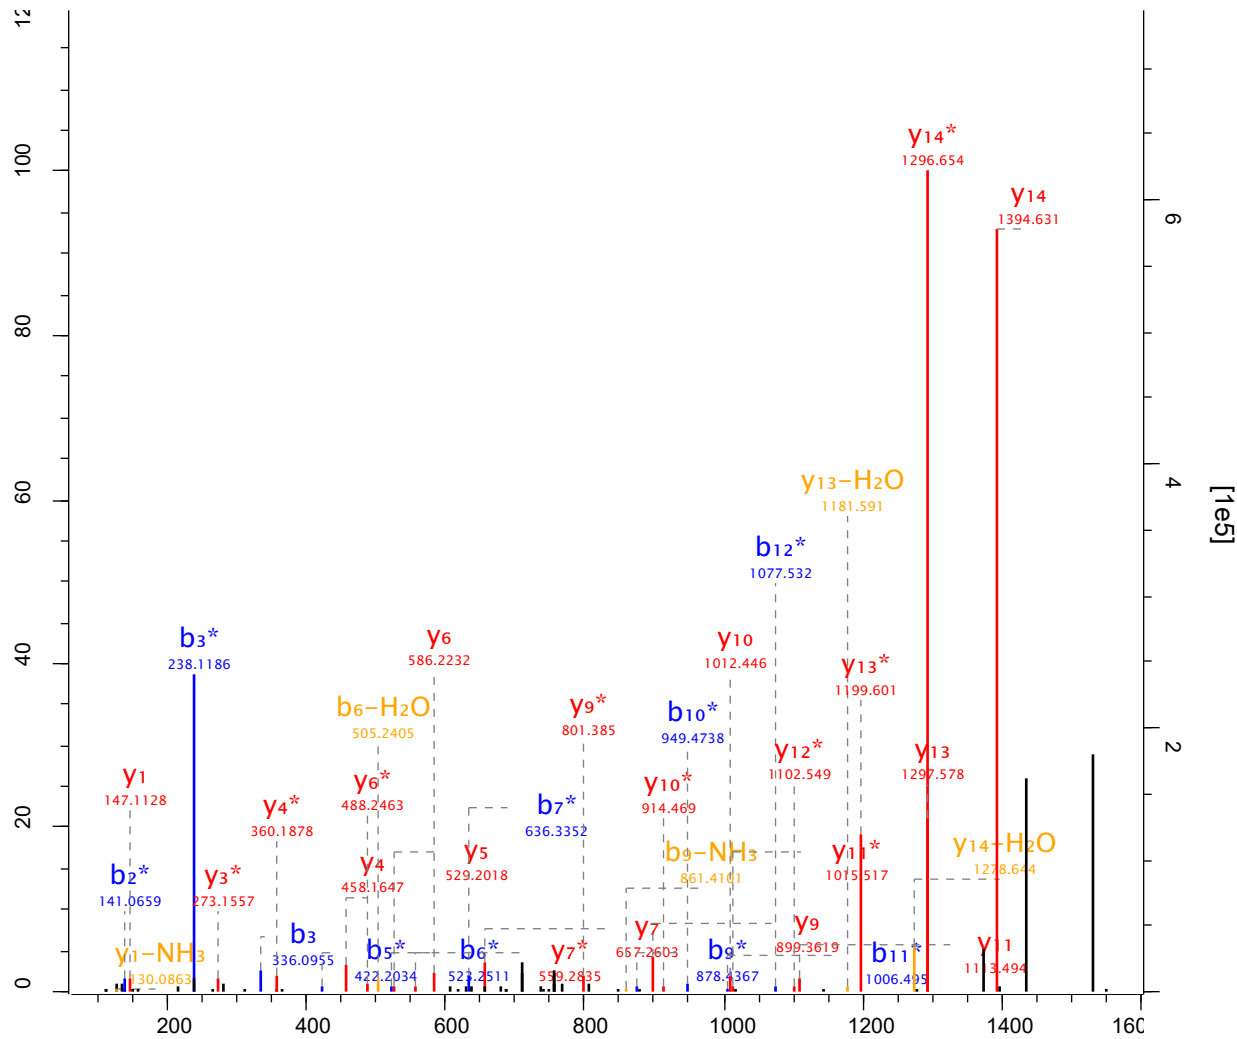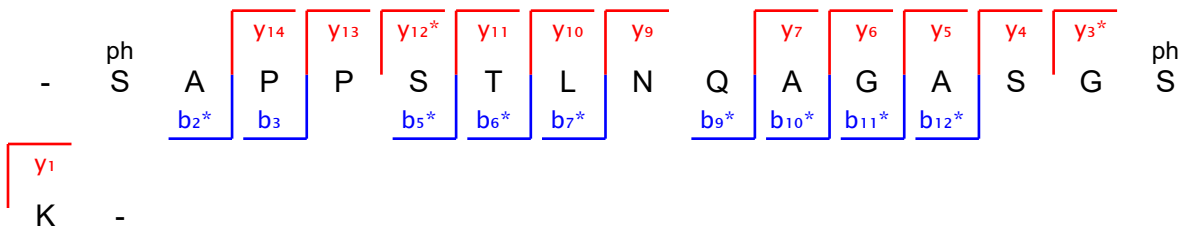

Raw file Scan Method Score m/z  
 sys\_02\_2 13135 FTMS; HCD 42.07 737.3

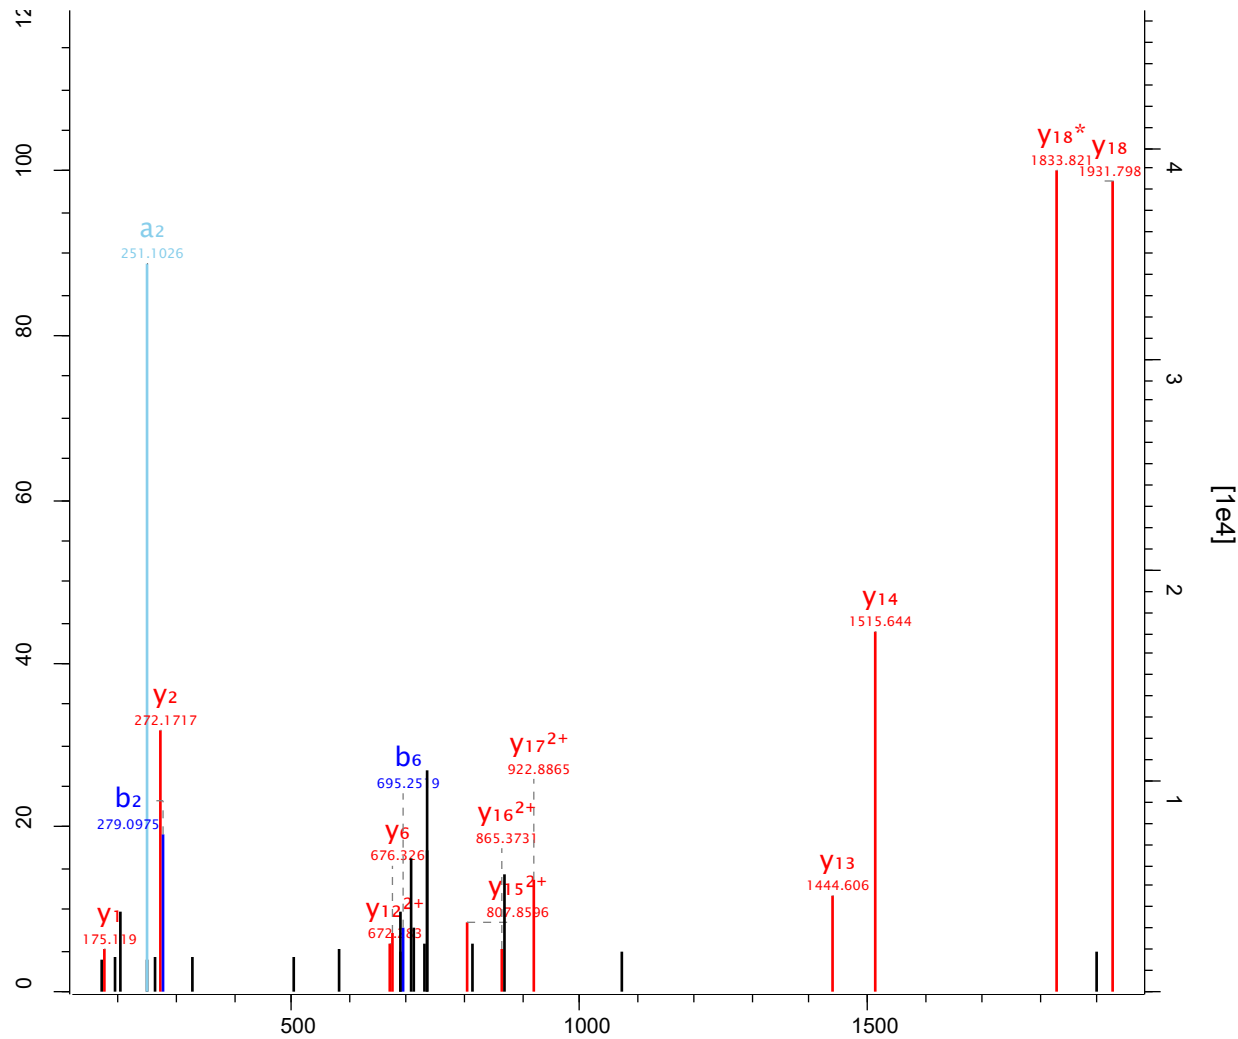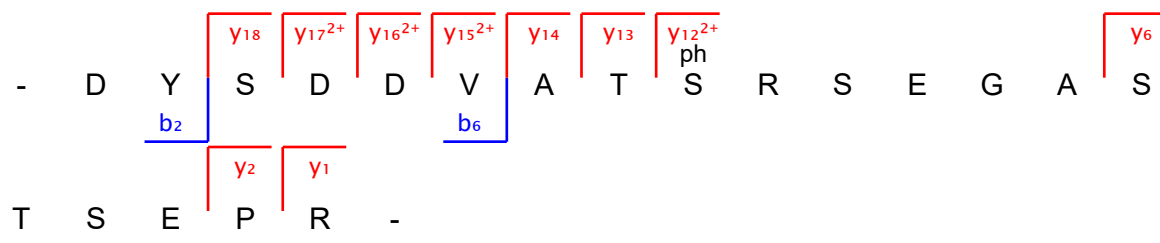

T S E P R -

Raw file sys\_02\_2 Scan 13167 Method FTMS; HCD Score 139.49 m/z 564.27

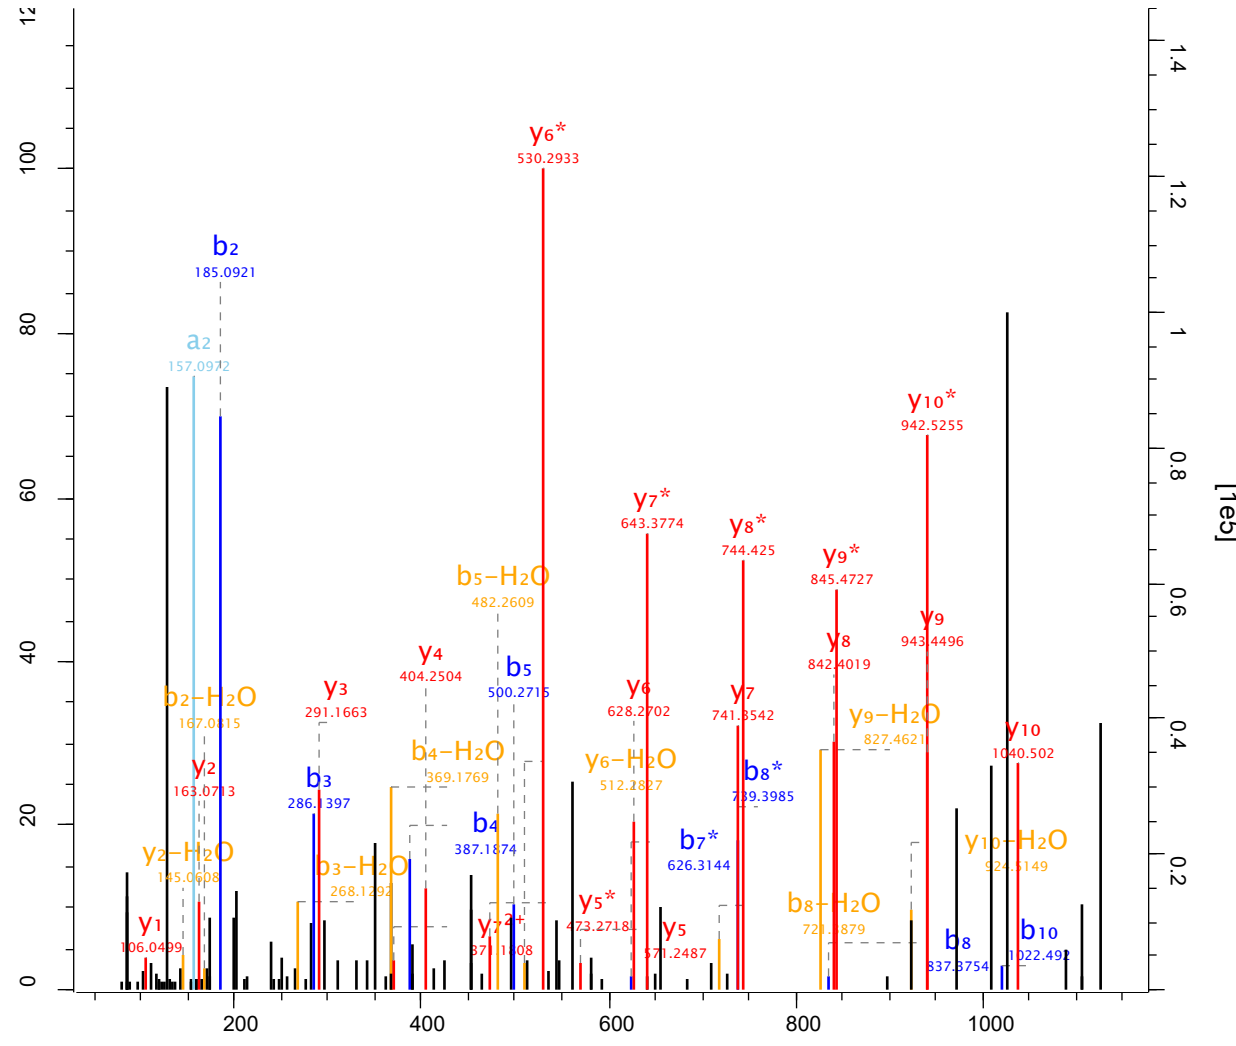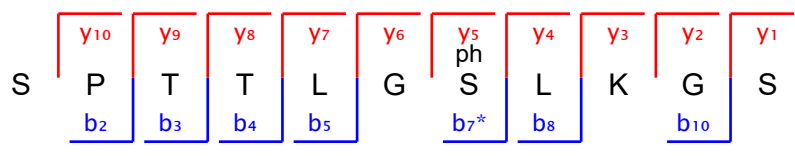

Raw file Scan Method Score m/z  
 sys\_02\_2 13302 FTMS; HCD 94.96 538.94

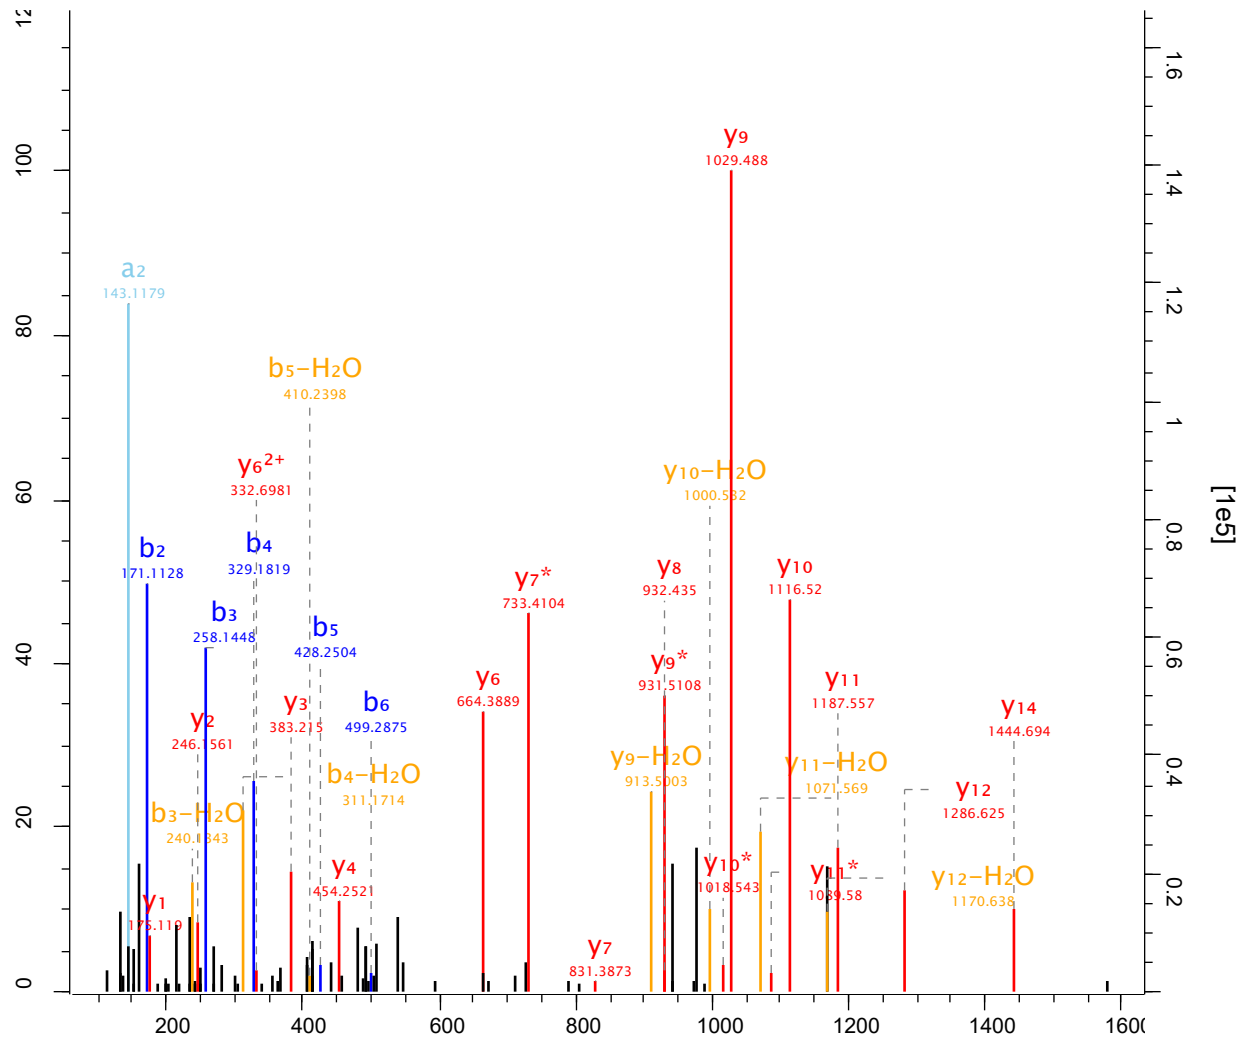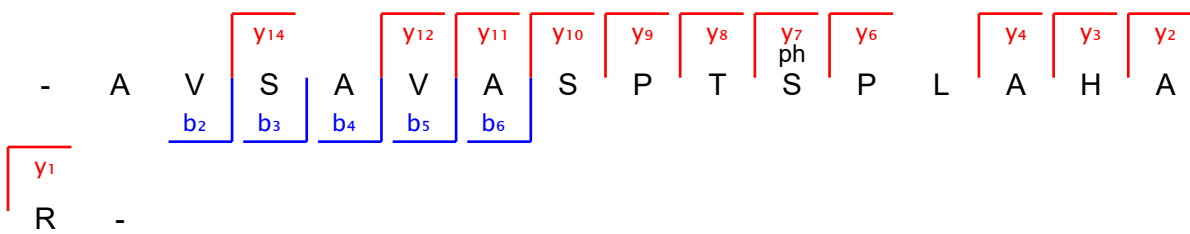



Raw file Scan Method Score m/z  
 sys\_02\_2 13492 FTMS; HCD 120.56 563.93

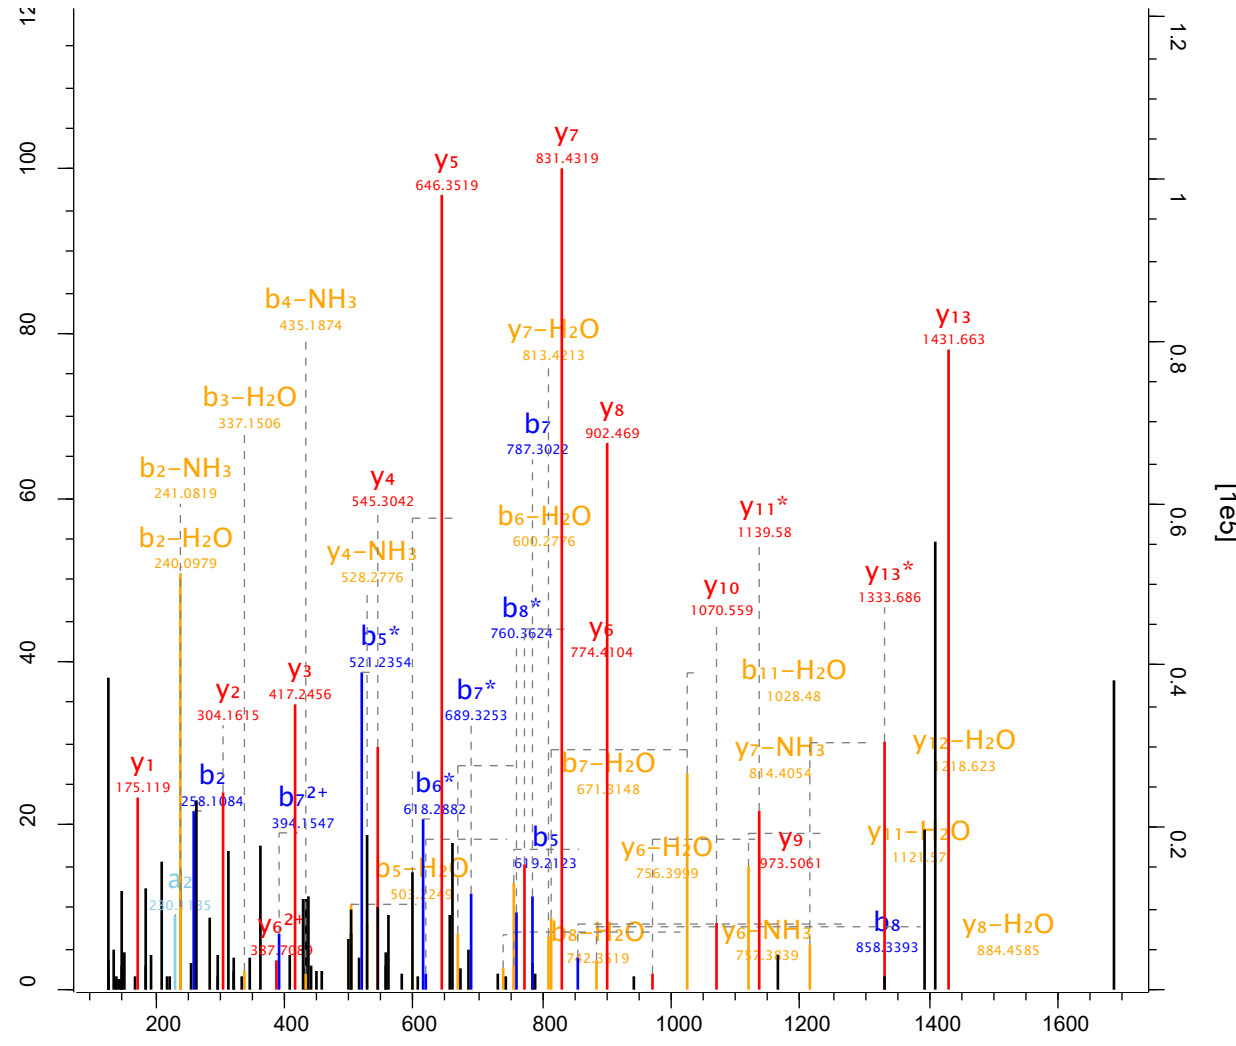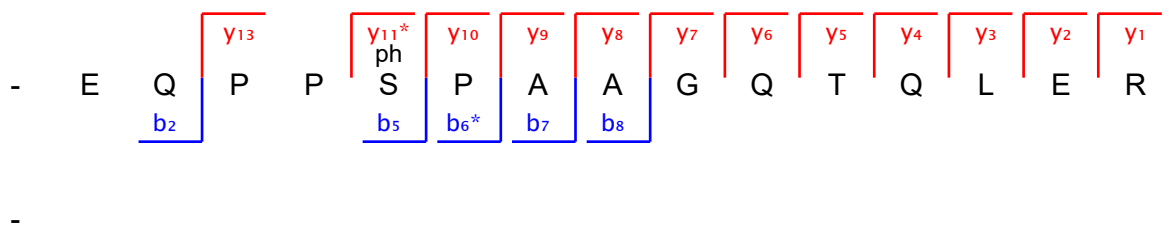

Raw file Scan Method Score m/z  
 sys\_02\_2 13547 FTMS; HCD 113.47 774.83

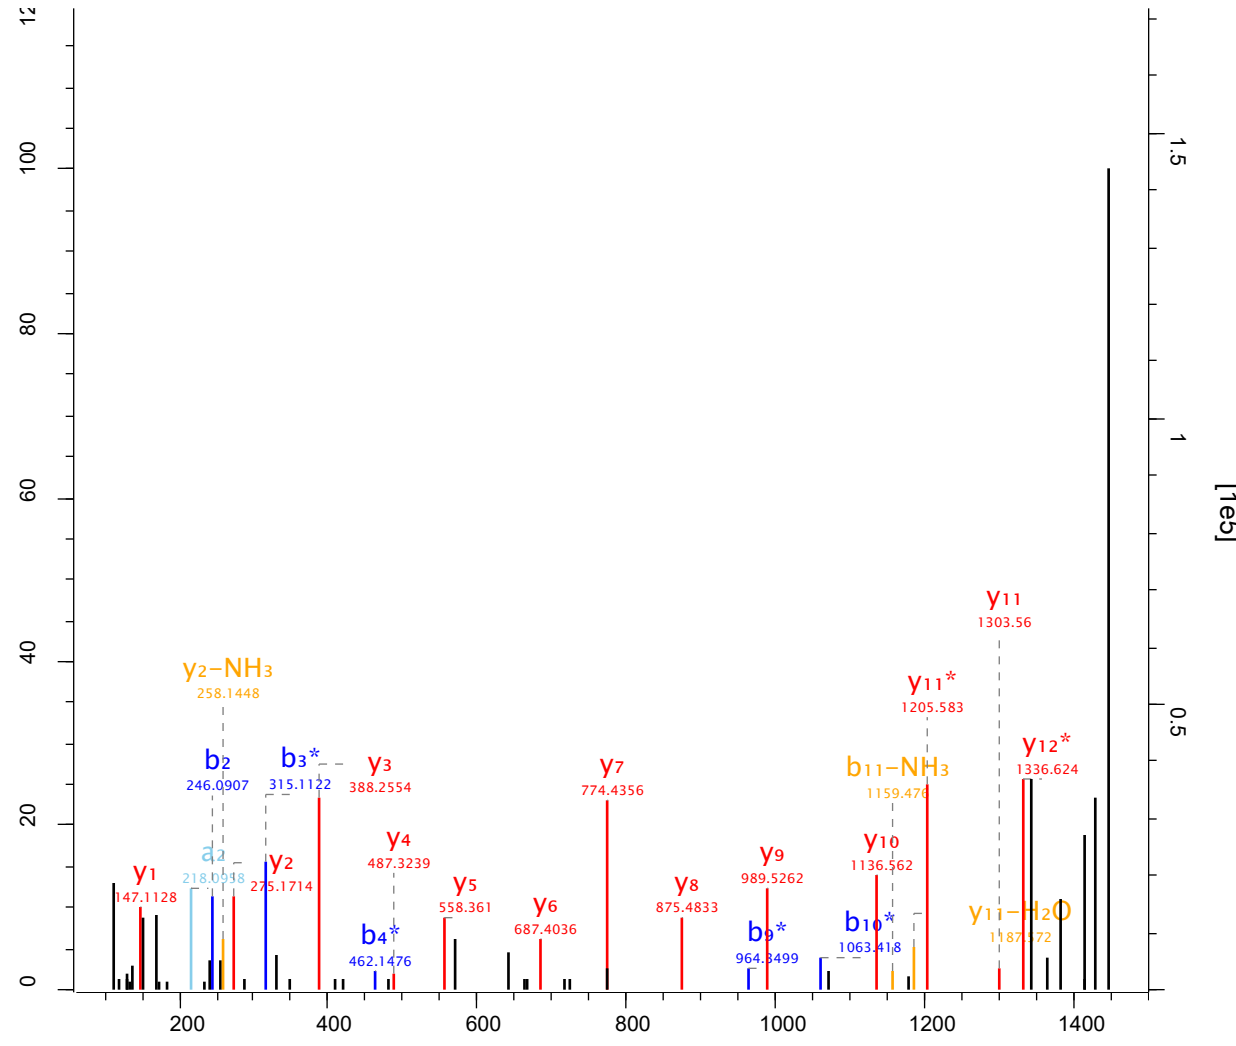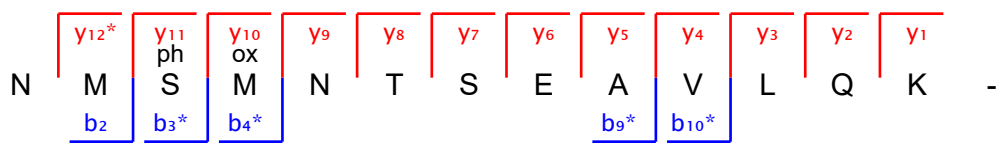

Raw file Scan Method Score m/z  
 sys\_02\_2 13627 FTMS; HCD 75.82 573.78

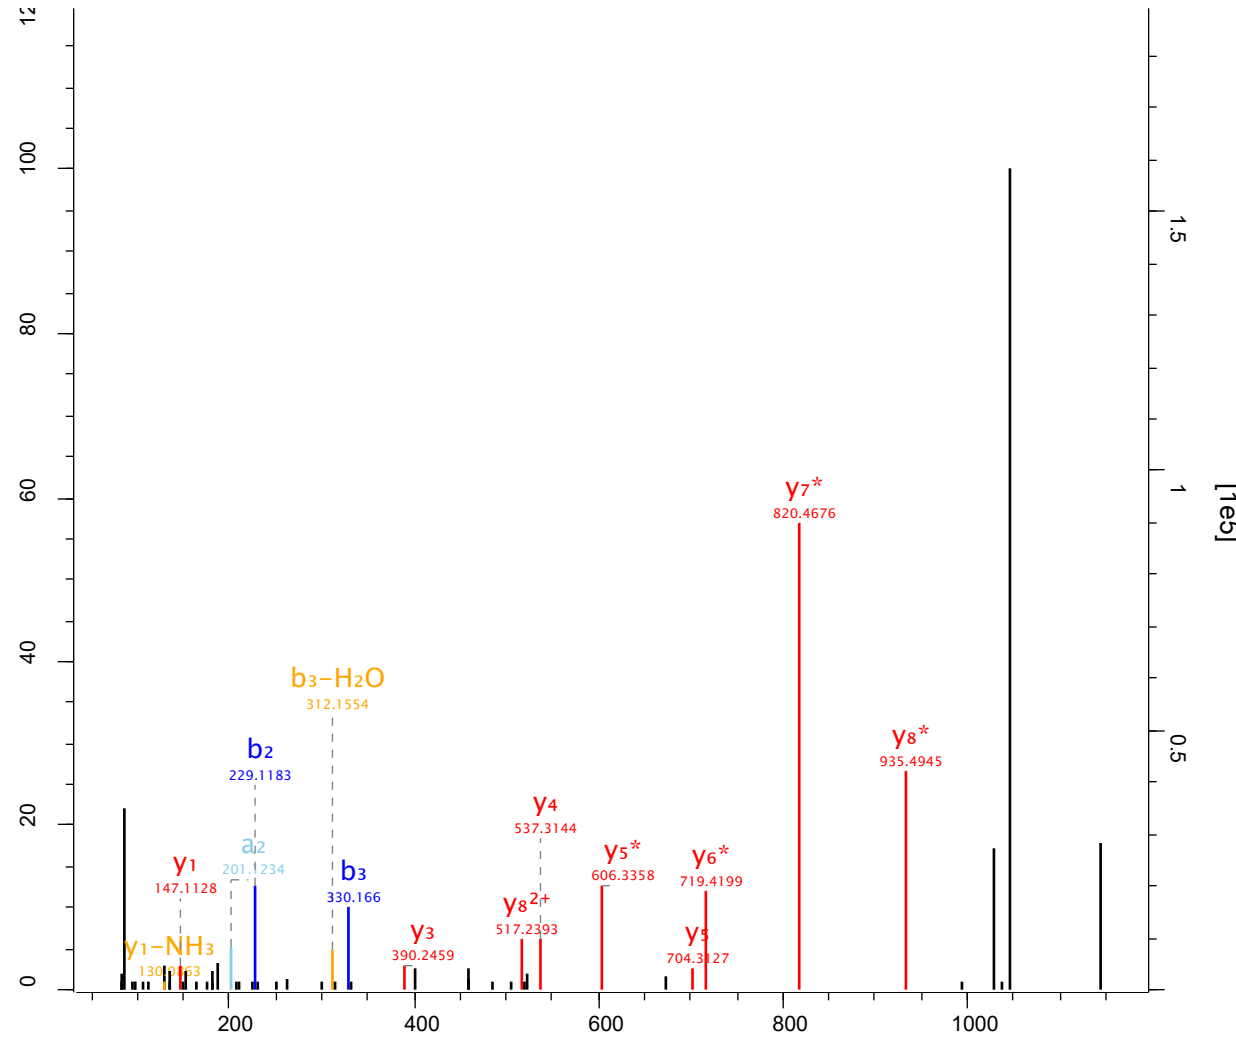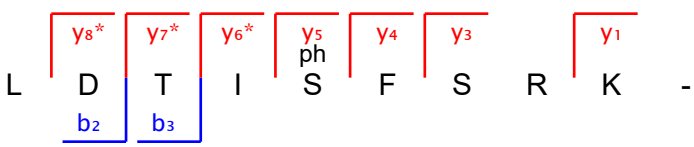

Raw file Scan Method Score m/z  
 sys\_02\_2 13694 FTMS; HCD 289.87 698.33

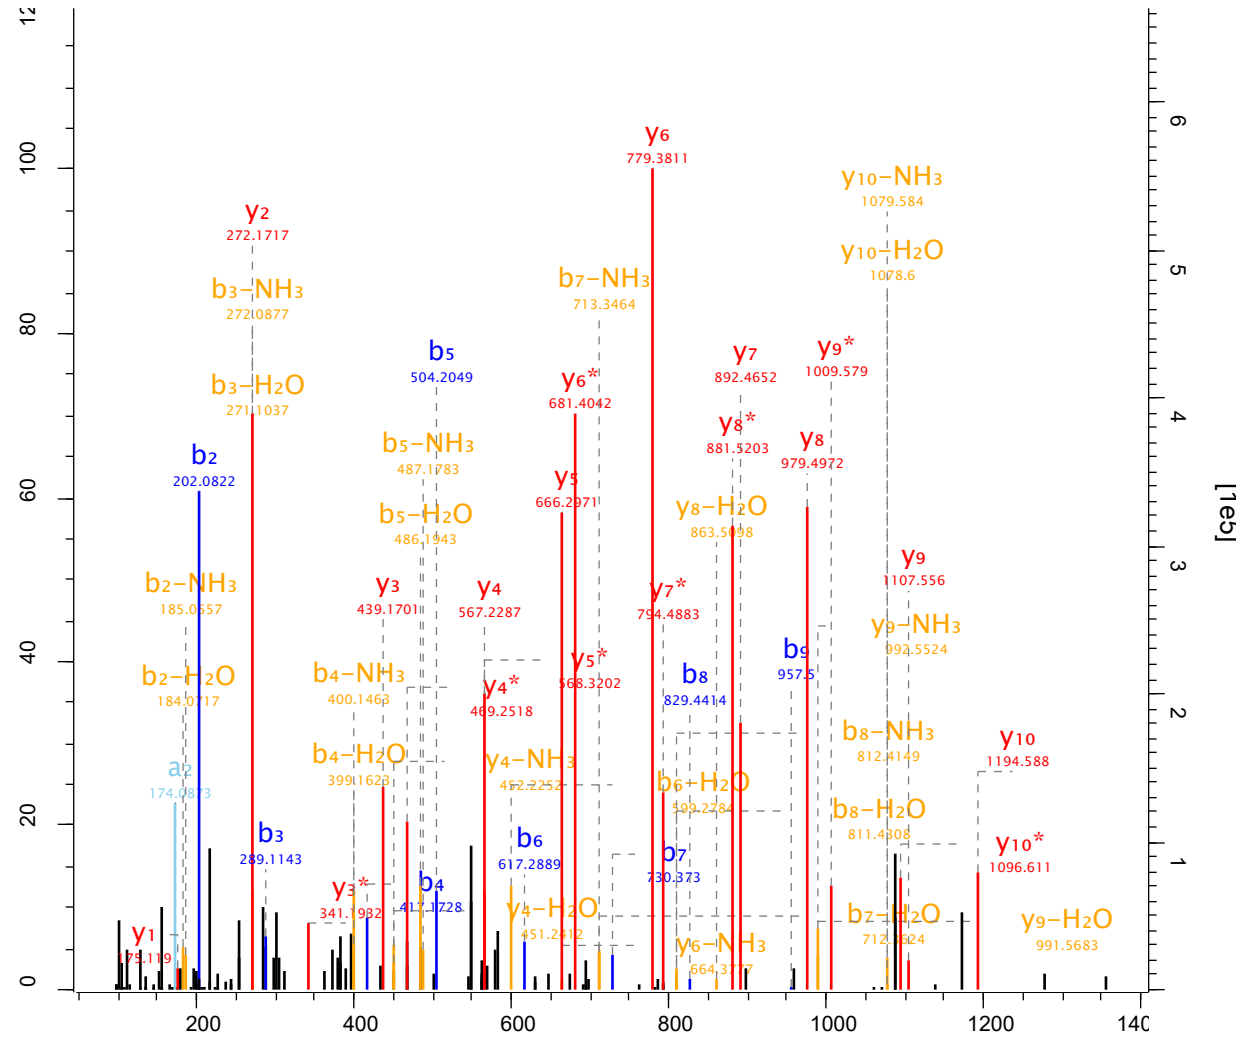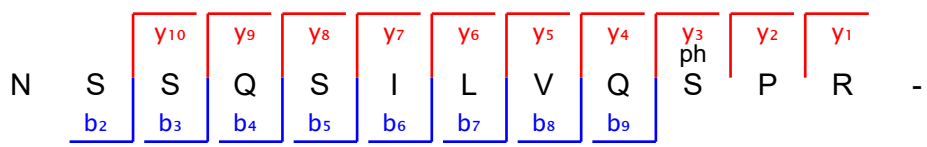

Raw file Scan Method Score m/z  
 sys\_02\_2 13814 FTMS; HCD 129.89 498.75

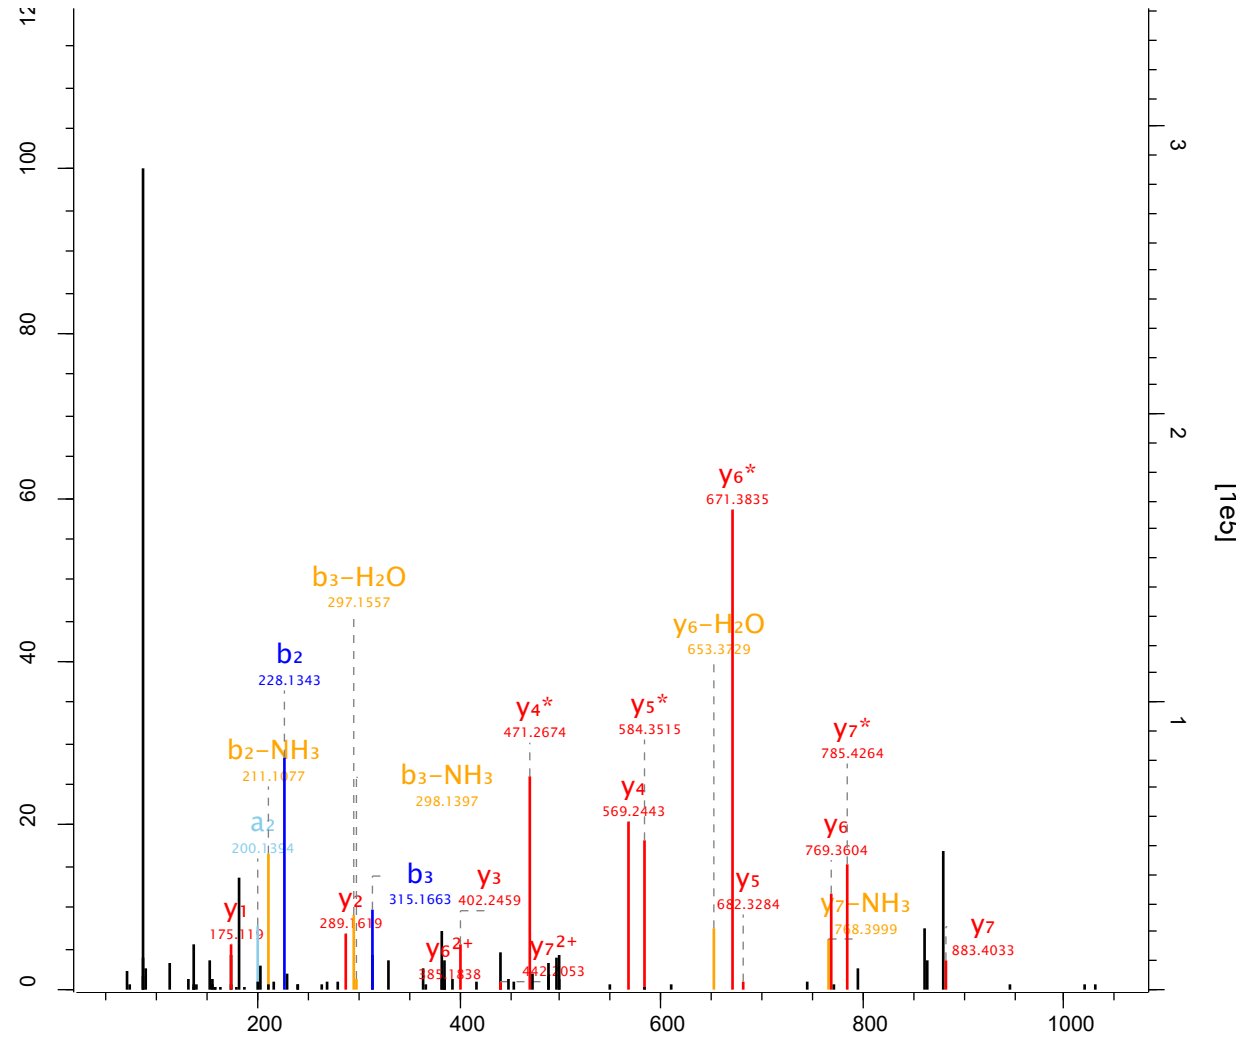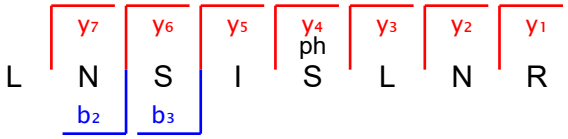

Raw file Scan Method Score m/z  
 sys\_02\_2 13826 FTMS; HCD 204.32 549.76

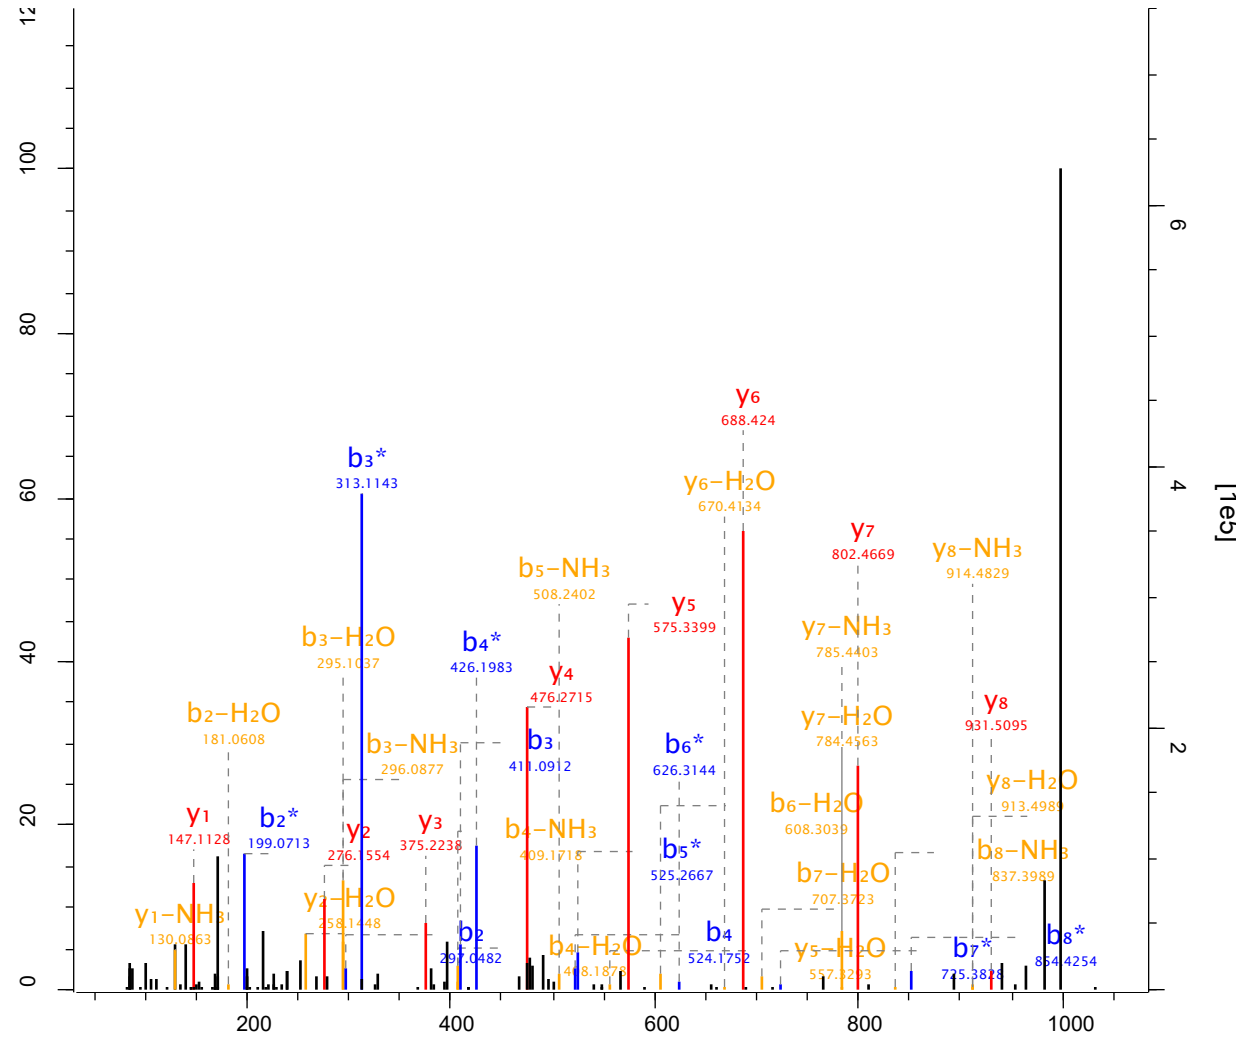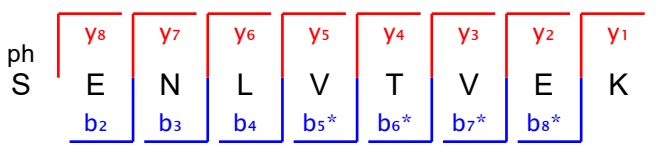

Raw file Scan Method Score m/z  
 sys\_02\_2 13833 FTMS; HCD 148.15 745.33

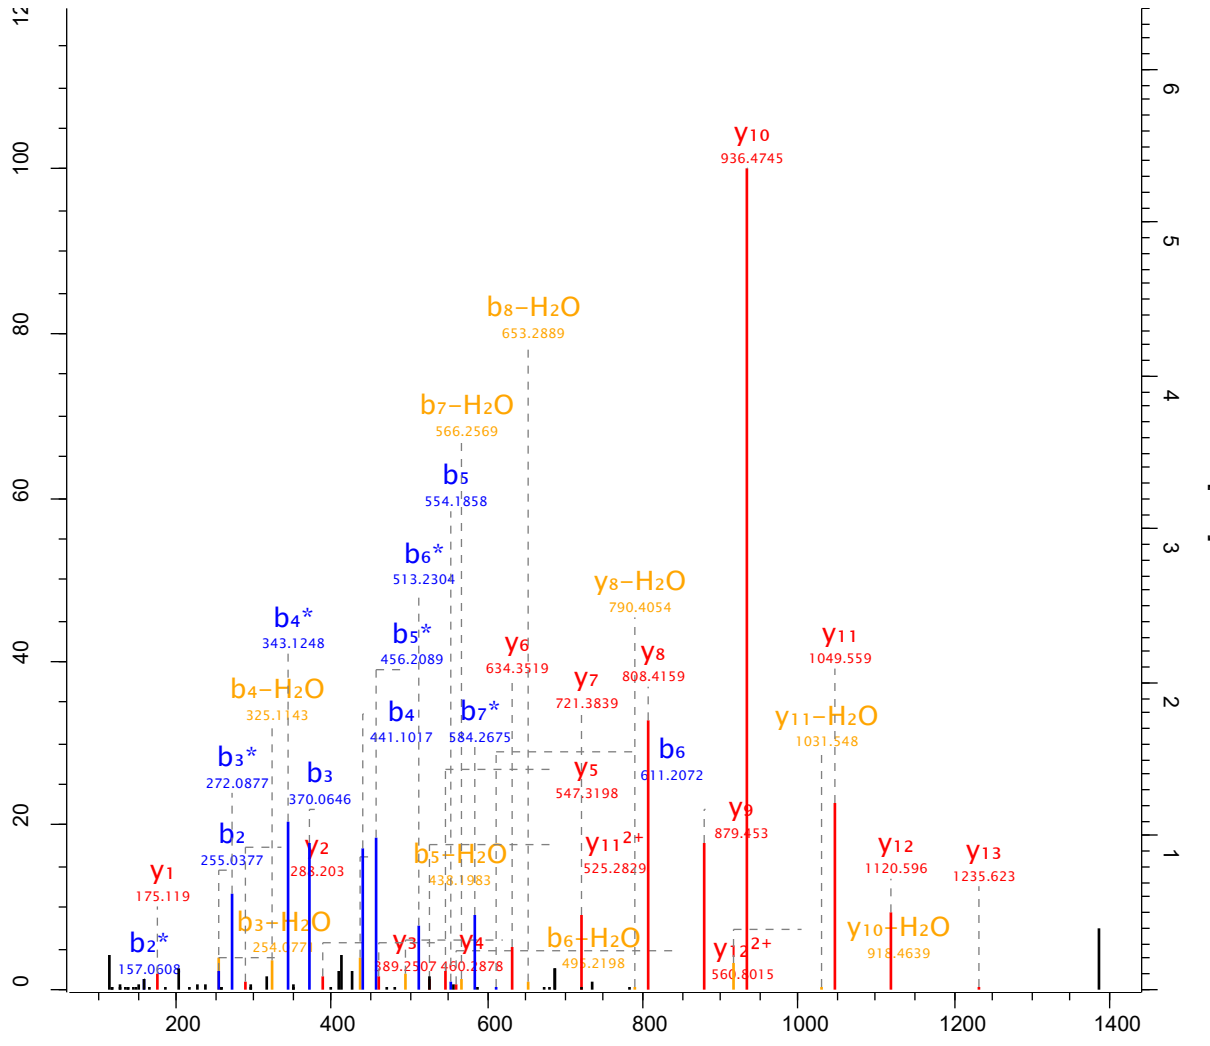

ph S S D A L G A S S S S A T I R

b<sub>2</sub>
y<sub>13</sub>
y<sub>12</sub>
y<sub>11</sub>
y<sub>10</sub>
y<sub>9</sub>
y<sub>8</sub>
y<sub>7</sub>
y<sub>6</sub>
y<sub>5</sub>
y<sub>4</sub>
y<sub>3</sub>
y<sub>2</sub>
y<sub>1</sub>

b<sub>3</sub>
b<sub>4</sub>
b<sub>5</sub>
b<sub>6</sub>
b<sub>7</sub>\*

Raw file Scan Method Score m/z  
 sys\_02\_2 14029 FTMS; HCD 50.19 468.25

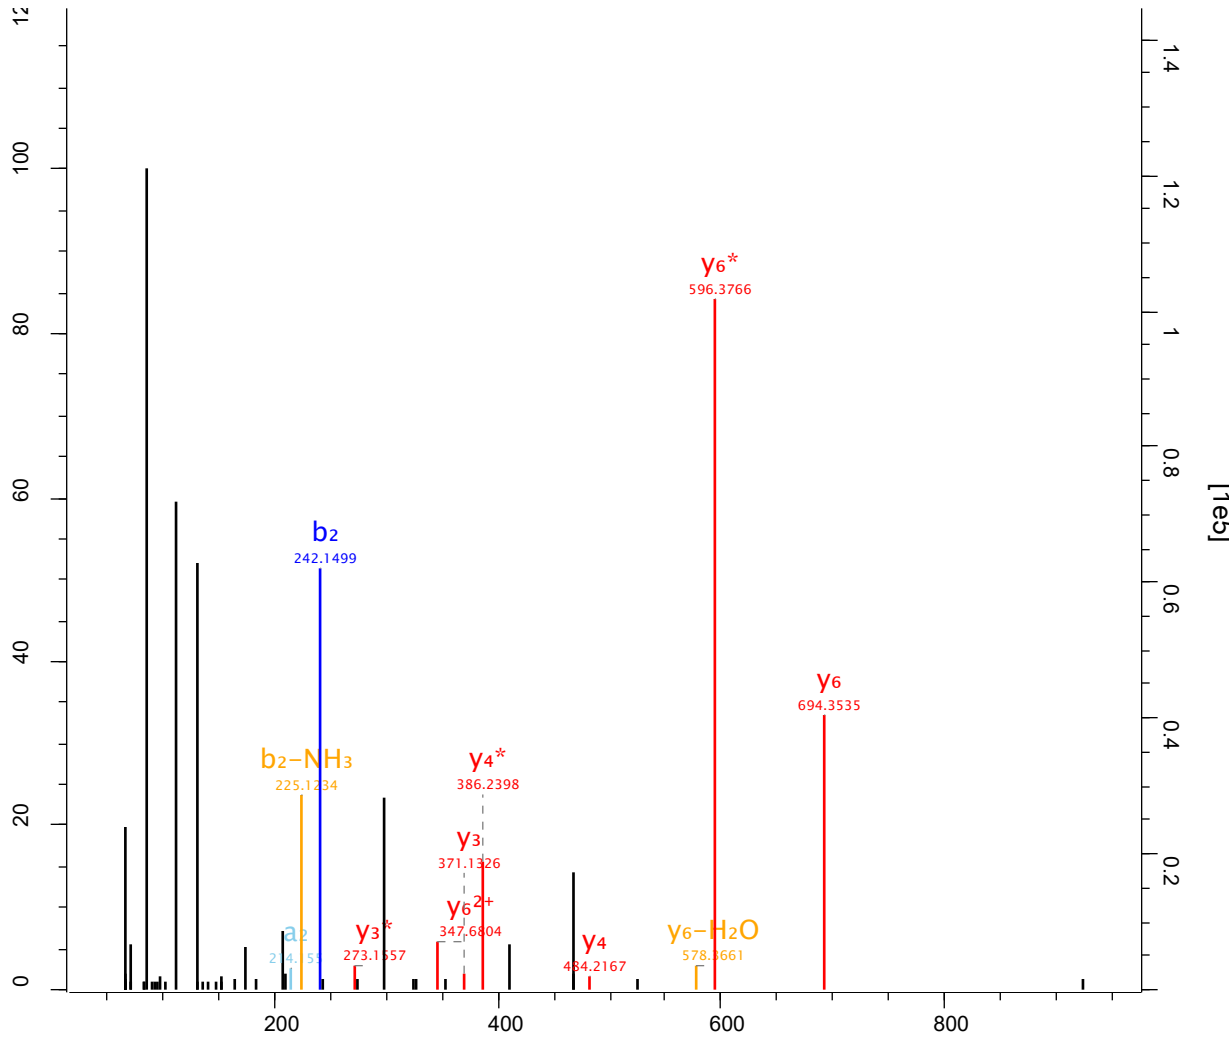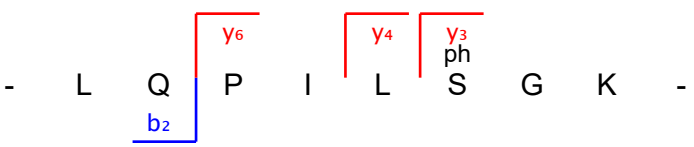



Raw file Scan Method Score m/z  
 sys\_02\_2 14242 FTMS; HCD 136.68 554.22

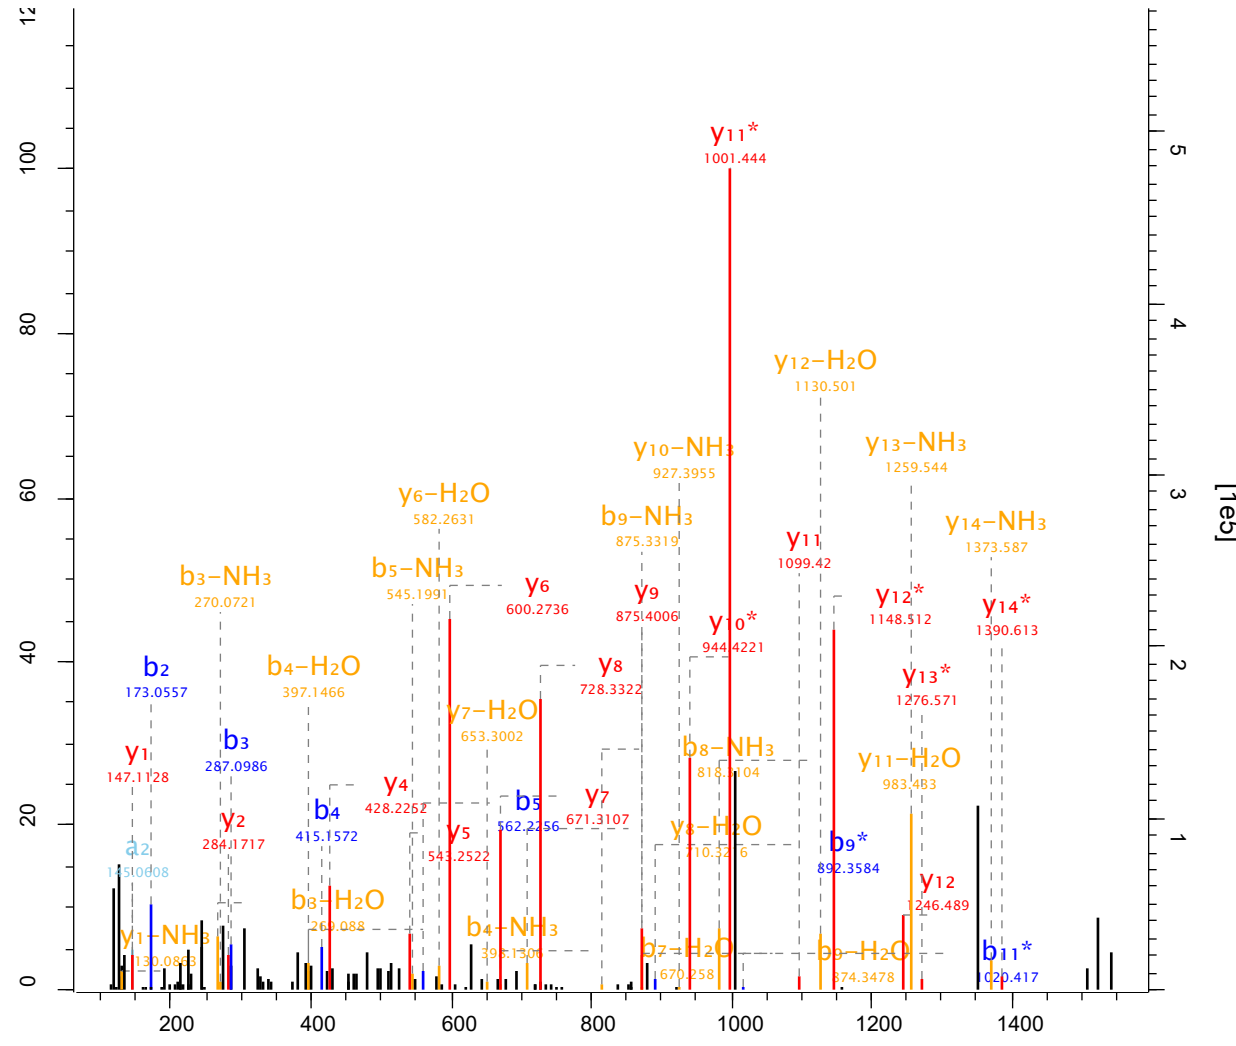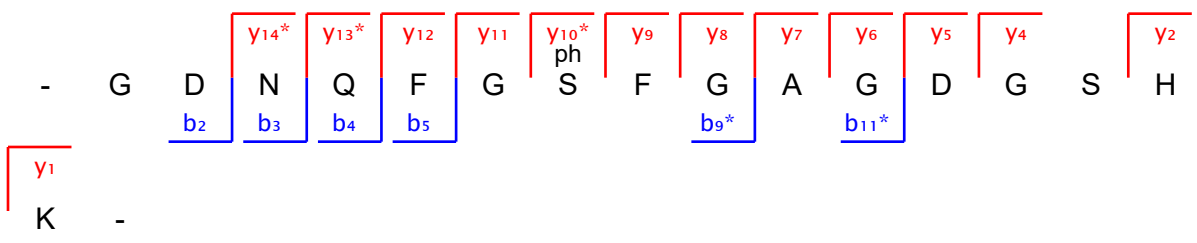

Raw file Scan Method Score m/z  
 sys\_02\_2 14254 FTMS; HCD 111.79 580.74

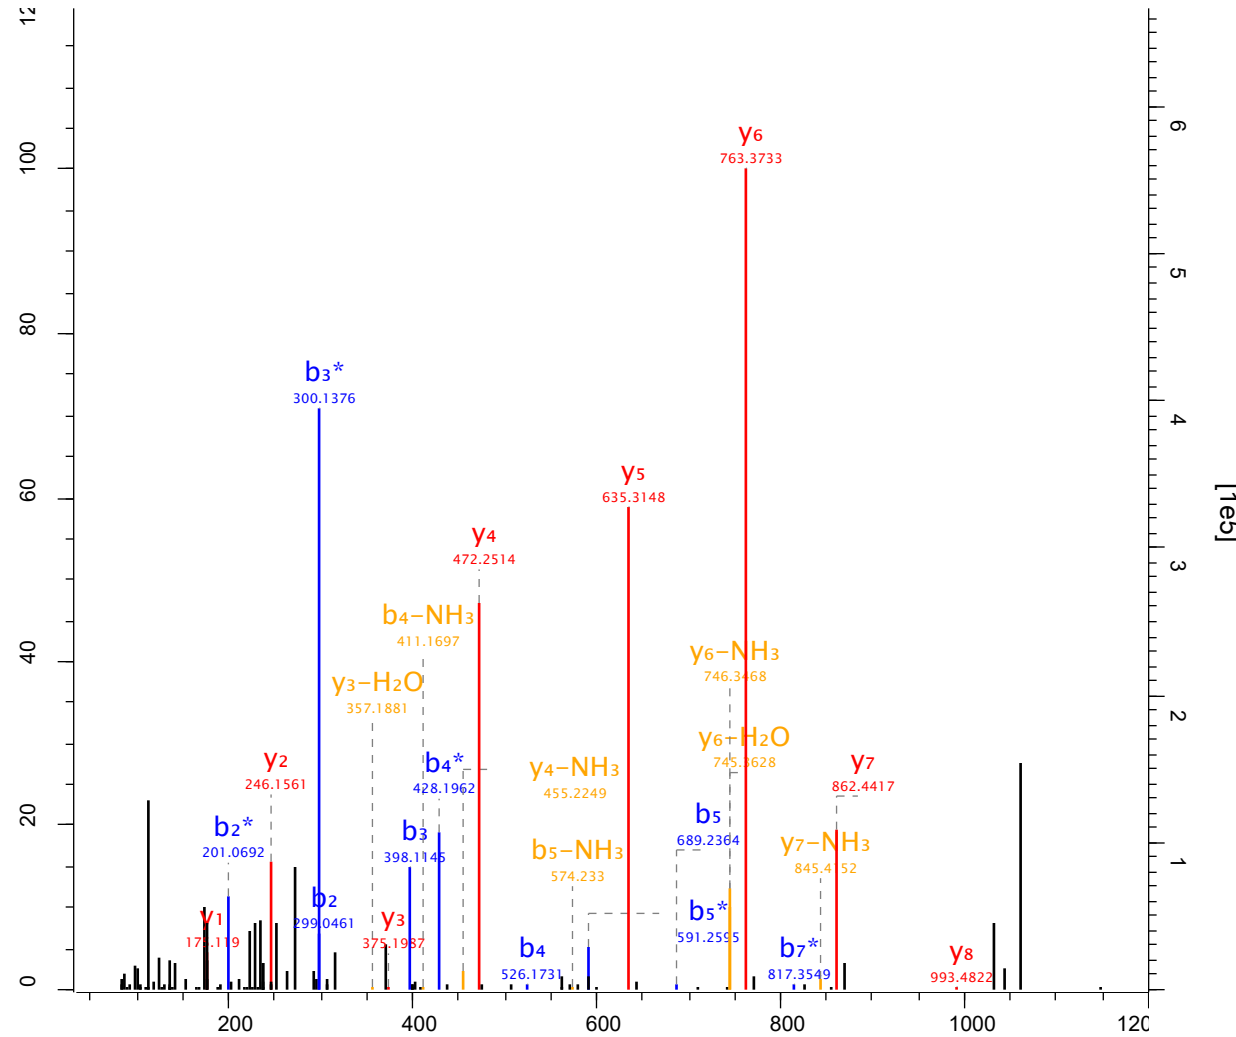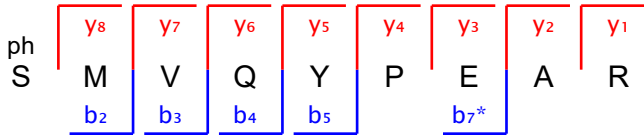

Raw file Scan Method Score m/z  
 sys\_02\_2 14356 FTMS; HCD 69.35 562.75

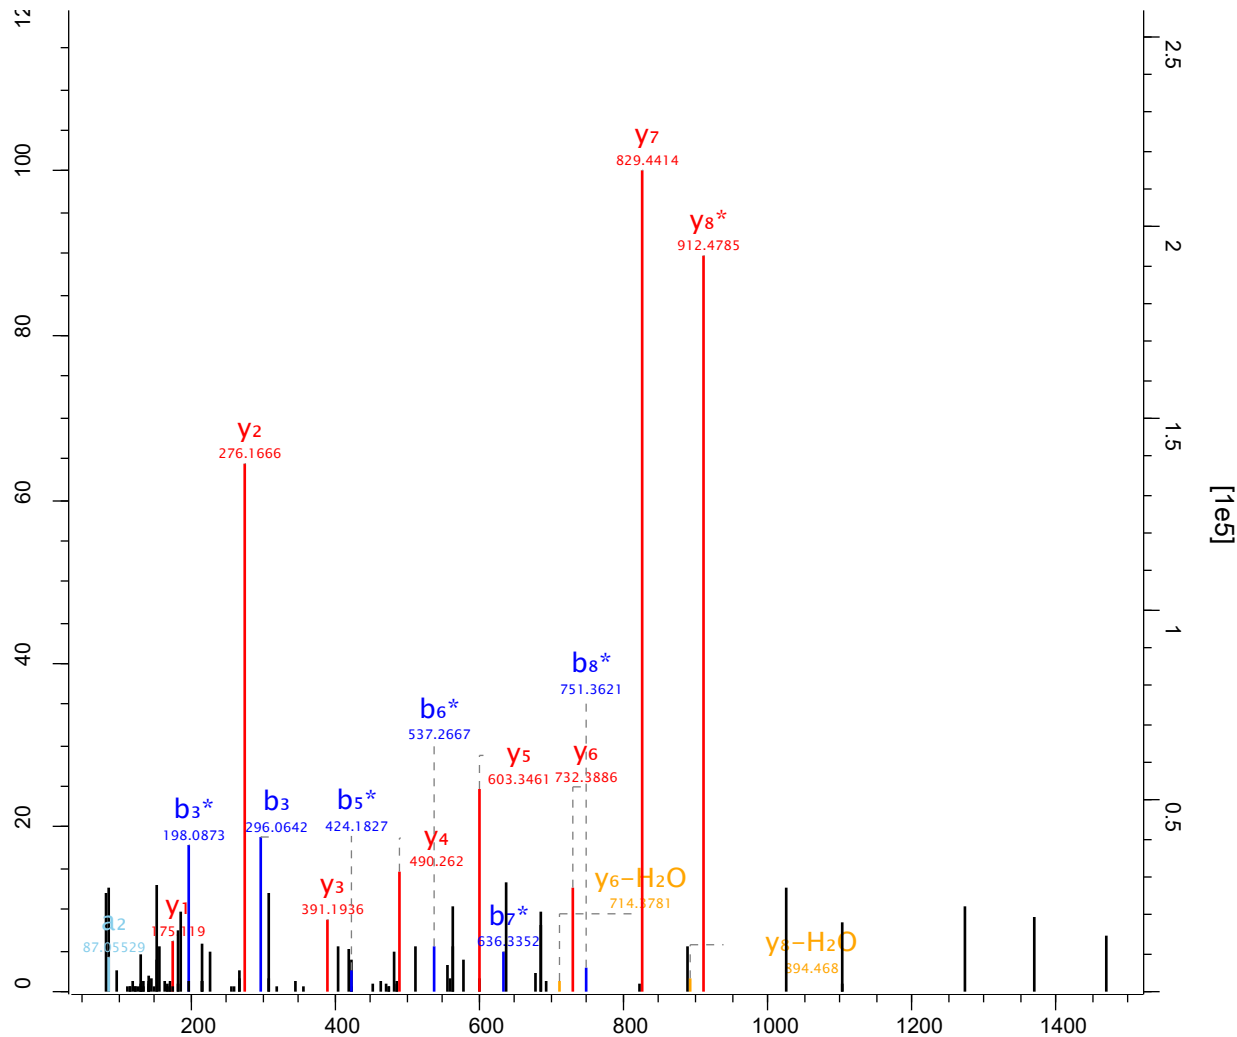

- G G T P E L V D T R -

a<sub>2</sub>
b<sub>3</sub>
b<sub>5</sub>\*
b<sub>6</sub>\*
b<sub>7</sub>\*
b<sub>8</sub>\*

y<sub>8</sub>\*
y<sub>7</sub>
y<sub>6</sub>
y<sub>5</sub>
y<sub>4</sub>
y<sub>3</sub>
y<sub>2</sub>
y<sub>1</sub>

Raw file Scan Method Score m/z  
 sys\_02\_2 14417 FTMS; HCD 111.22 760.8

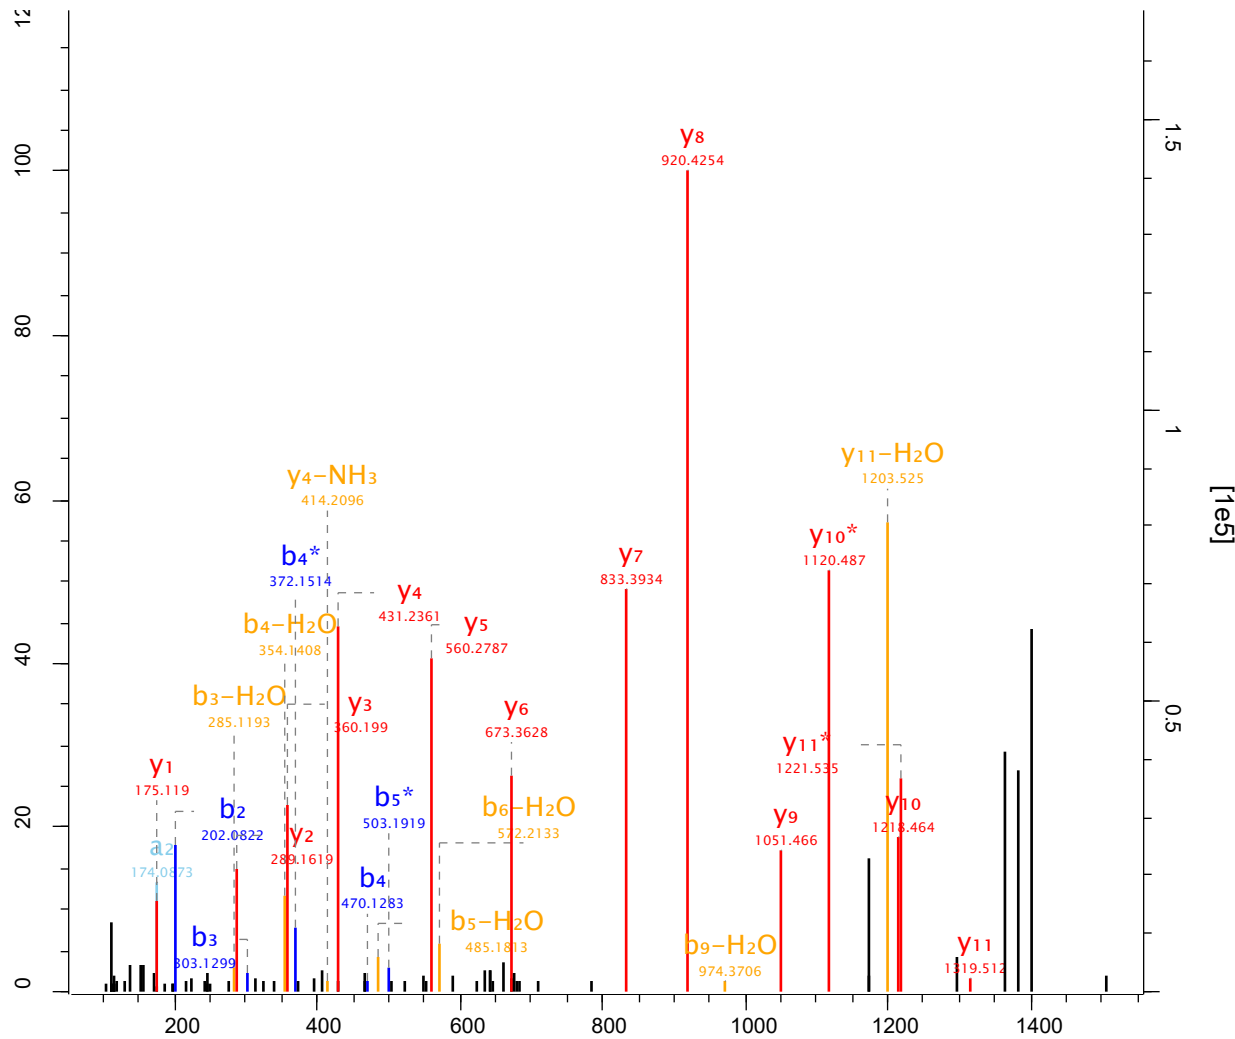

- N S T S M S C L E A A N R -

b<sub>2</sub>
b<sub>3</sub>
b<sub>4</sub>
b<sub>5</sub>\*
y<sub>11</sub>
y<sub>10</sub> ph
y<sub>9</sub>
y<sub>8</sub>
y<sub>7</sub>
y<sub>6</sub>
y<sub>5</sub>
y<sub>4</sub>
y<sub>3</sub>
y<sub>2</sub>
y<sub>1</sub>

| Raw file | Scan | Method    | Score | m/z    |
|----------|------|-----------|-------|--------|
| sys_02_2 | 1461 | FTMS; HCD | 48.53 | 440.86 |

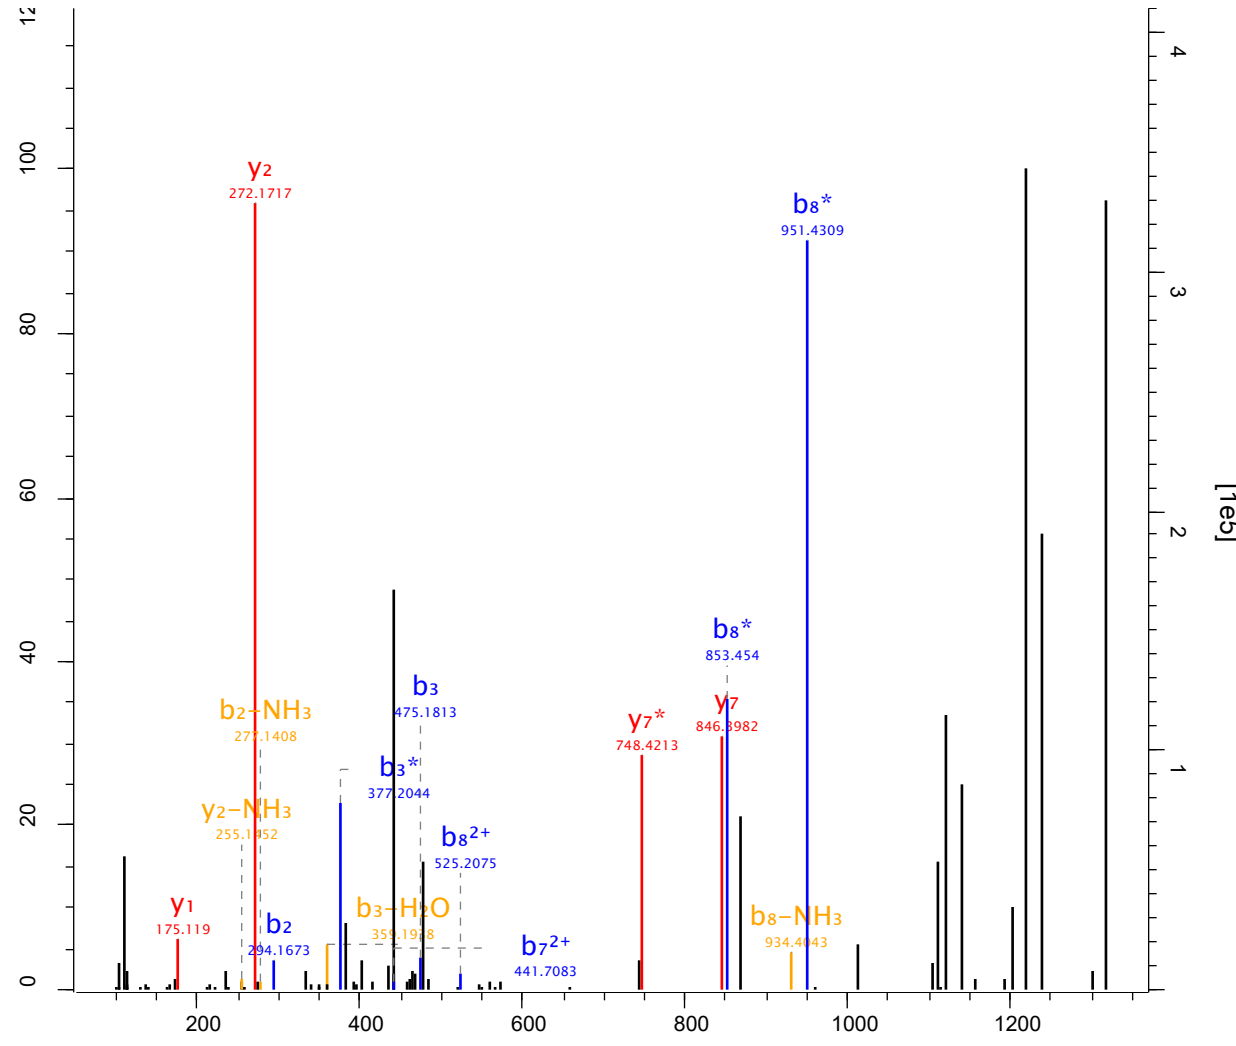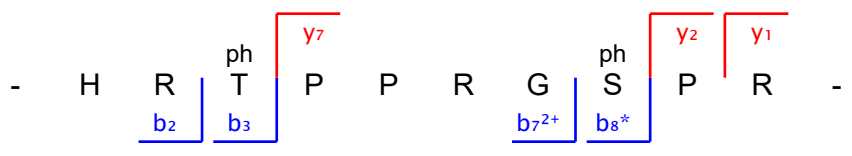

Raw file Scan Method Score m/z  
 sys\_02\_2 14752 FTMS; HCD 58.32 601.26

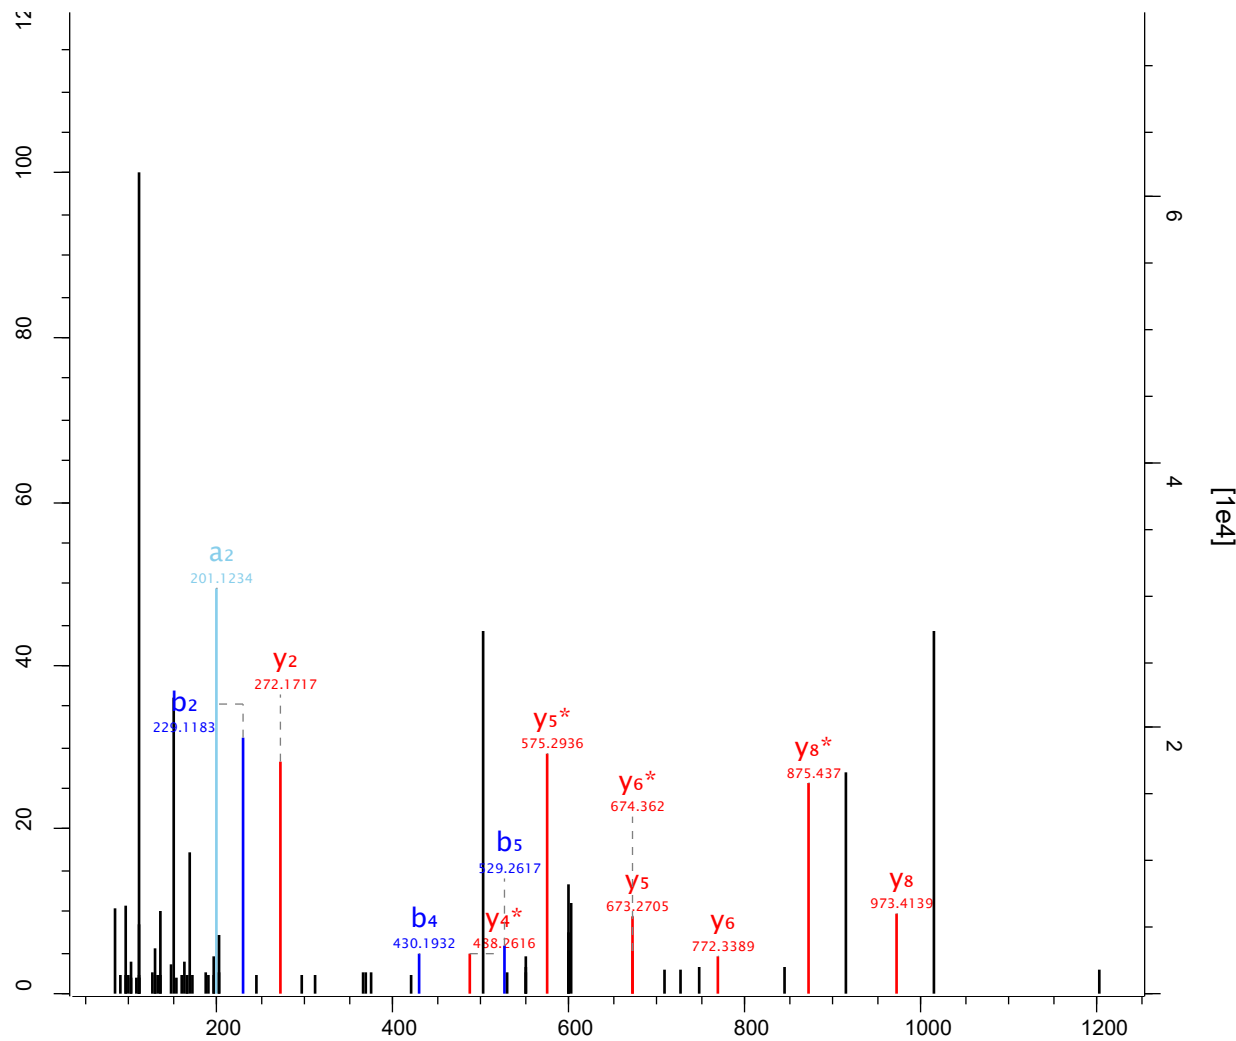

- V E S N V S F S P R -

Fragmentation scheme diagram showing peptide sequence: - V E S N V S F S P R -. Brackets indicate fragmentation sites: b2 (under E), b4 (under N), b5 (under V), y8 (over S), y6 (over V), y5 (over S), y4\* (over F), and y2 (over P).

Raw file Scan Method Score m/z  
 sys\_02\_2 1498 FTMS; HCD 43.03 427.16

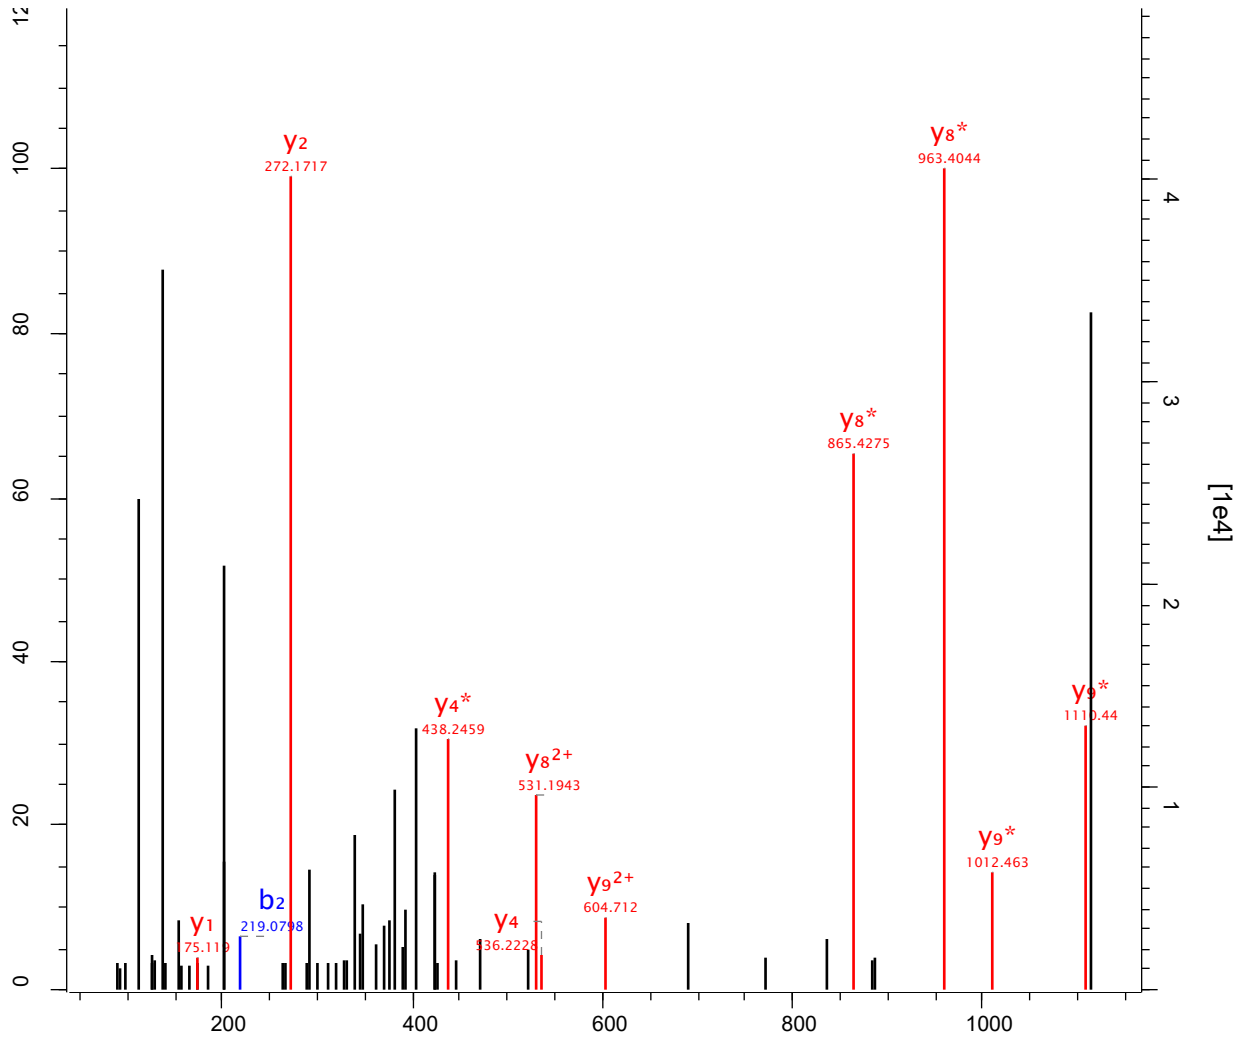

- A y<sub>9</sub>\*  
ox y<sub>8</sub>\* ph S R S y<sub>4</sub> ph S y<sub>2</sub> y<sub>1</sub>  
b<sub>2</sub> D S R S P S P R -

Raw file Scan Method Score m/z  
 sys\_02\_2 15114 FTMS; HCD 74.12 685.67

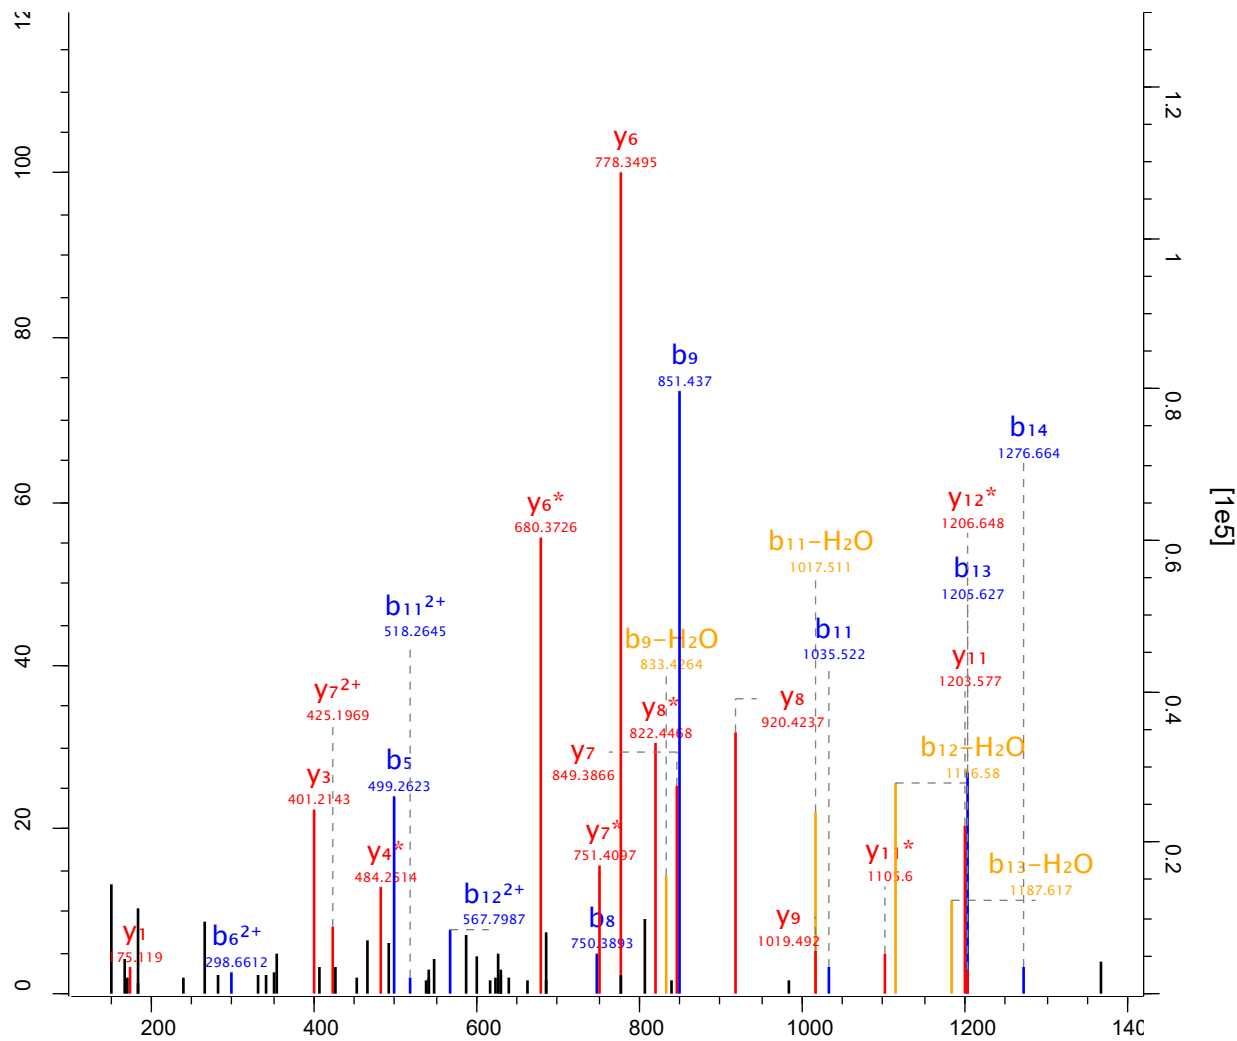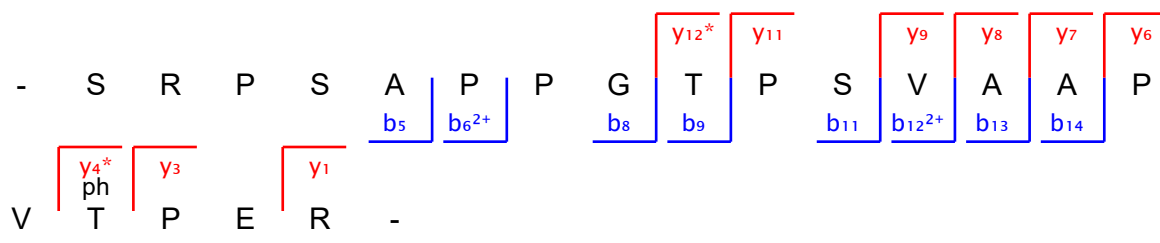



Raw file Scan Method Score m/z  
 sys\_02\_2 15423 FTMS; HCD 160.27 584.95

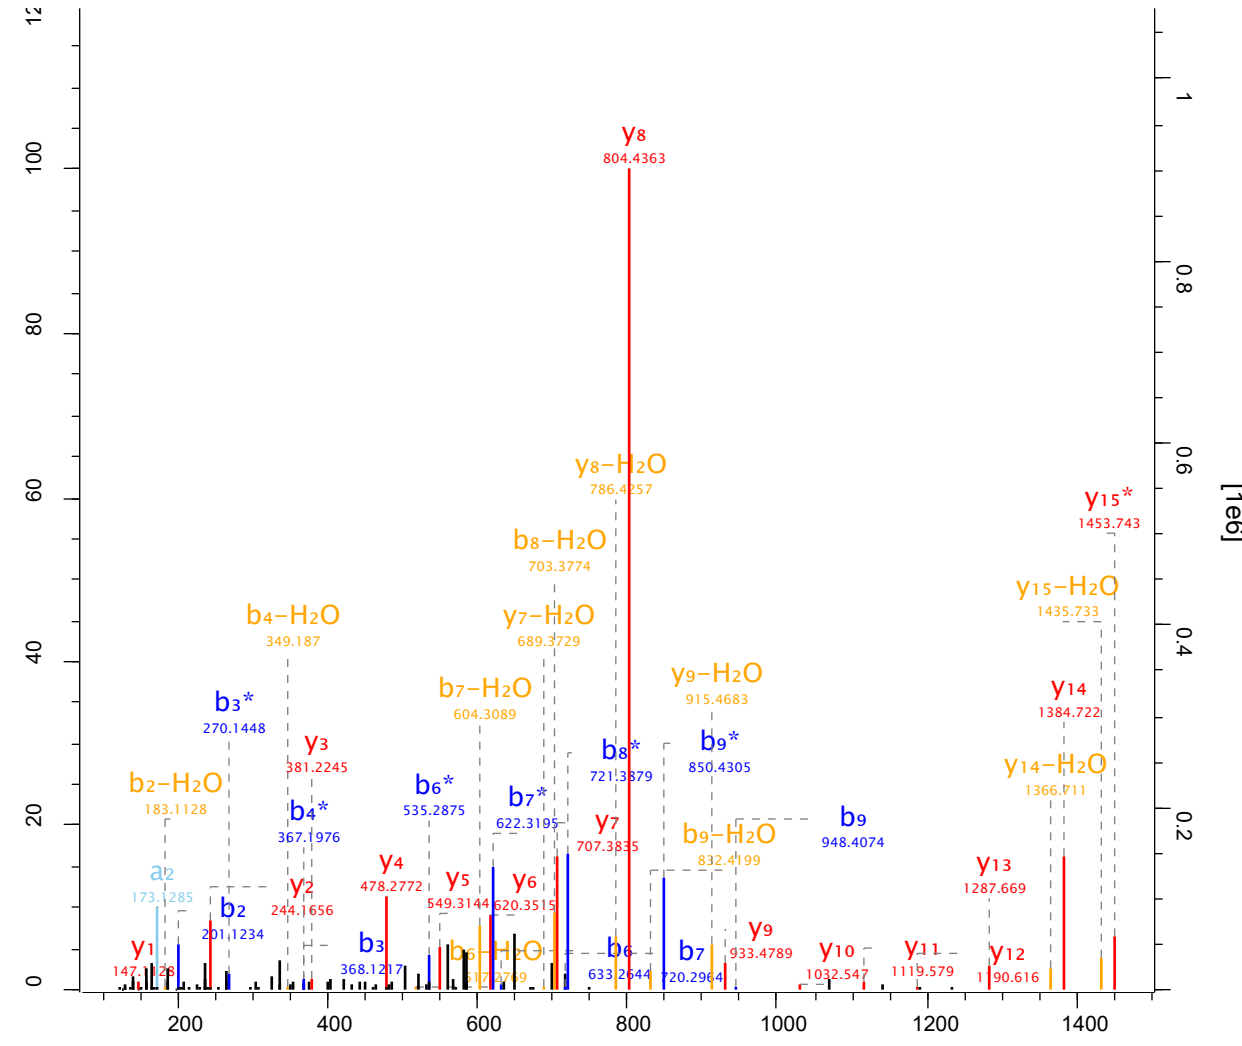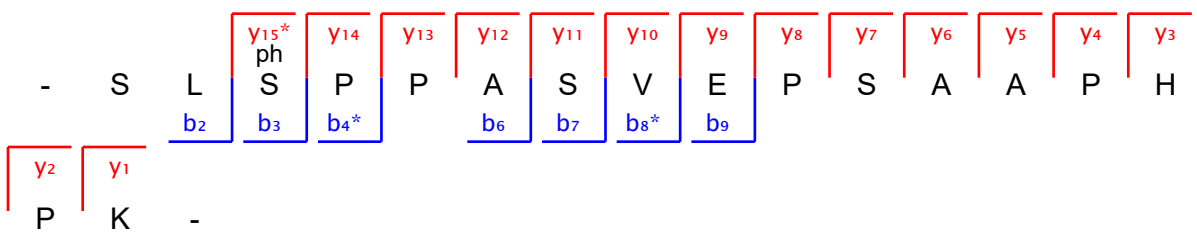

Raw file Scan Method Score m/z  
 sys\_02\_2 1550 FTMS; HCD 68.41 462.23

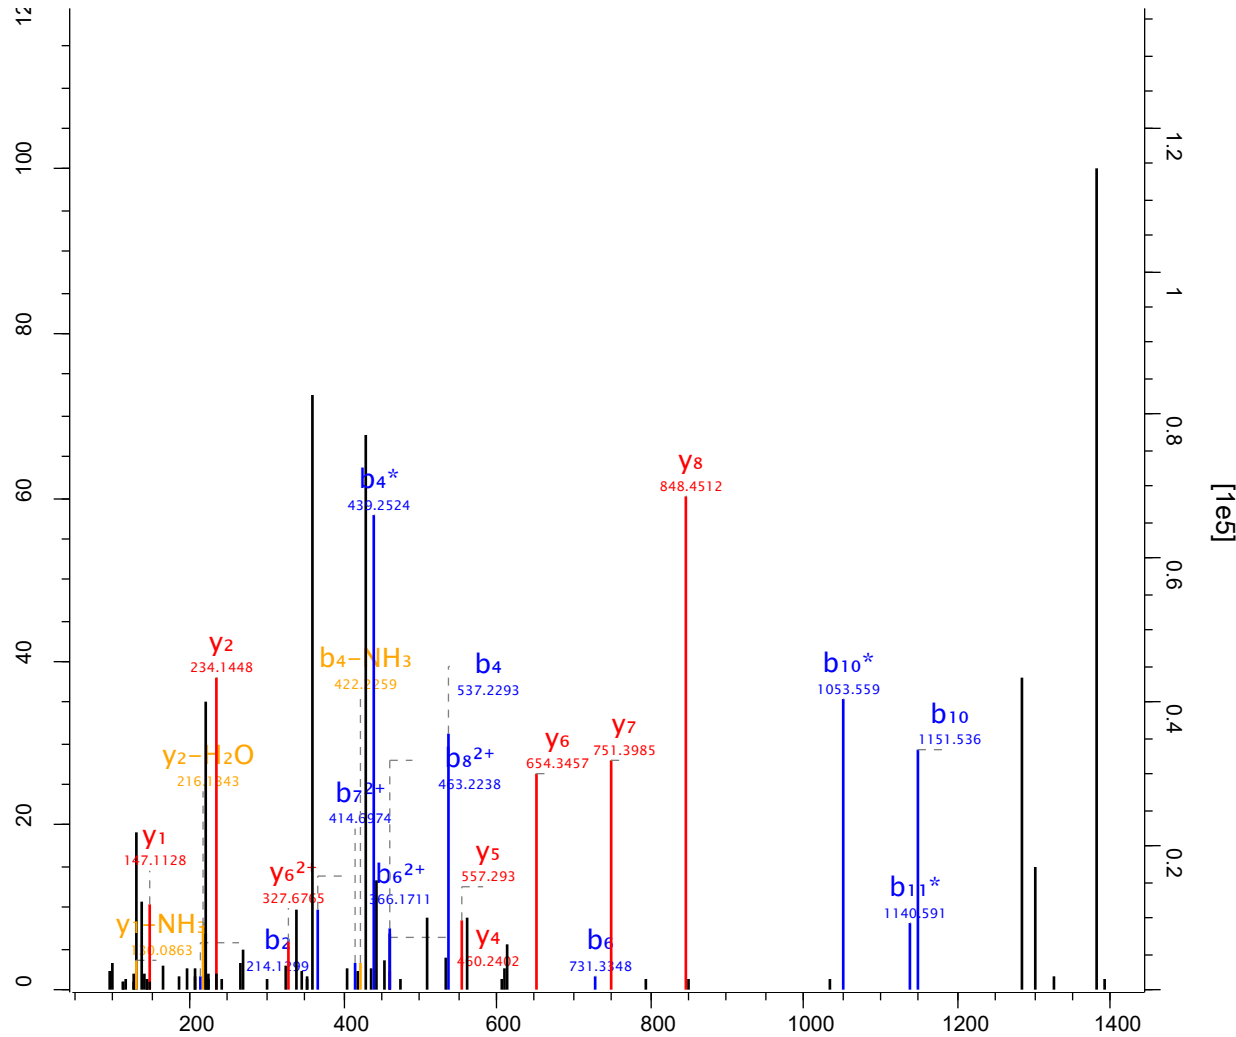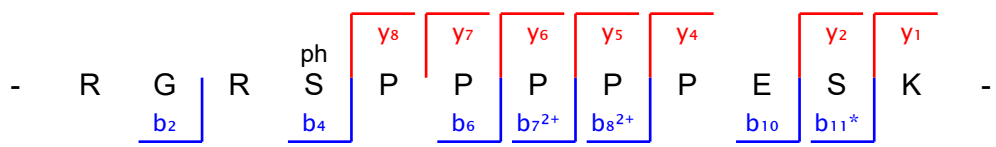

Raw file Scan Method Score m/z  
 sys\_02\_2 15620 FTMS; HCD 69.48 530.24

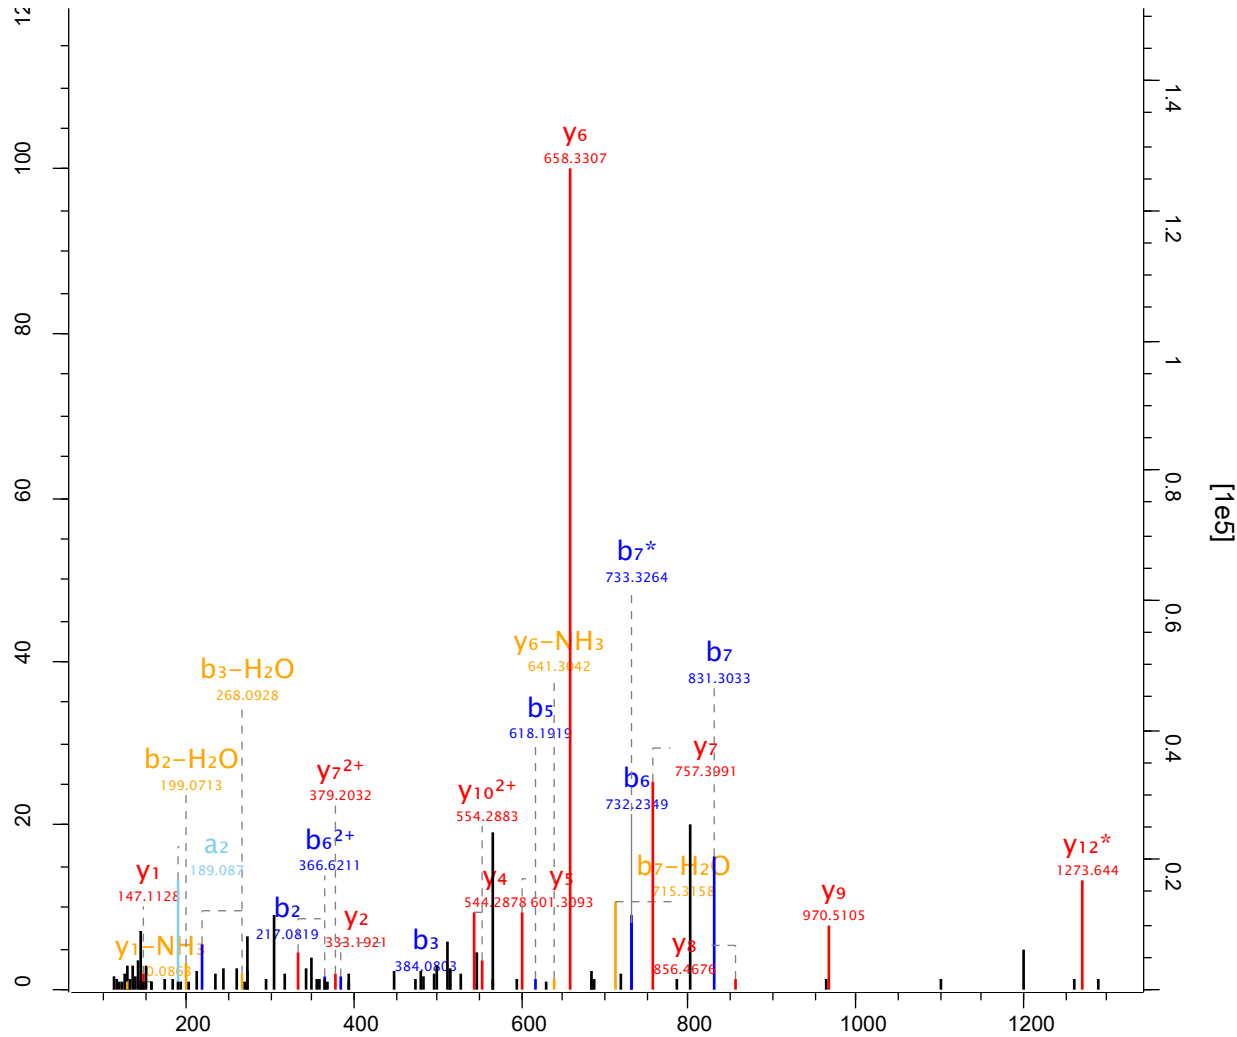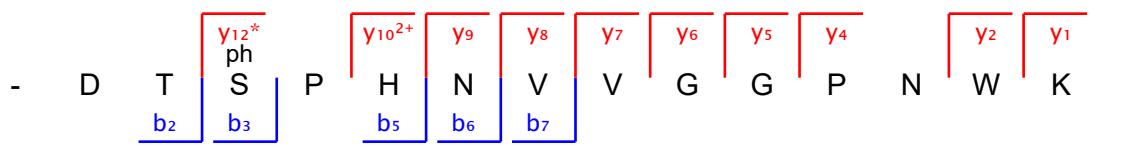

Raw file Scan Method Score m/z  
 sys\_02\_2 15637 FTMS; HCD 80.86 790.81

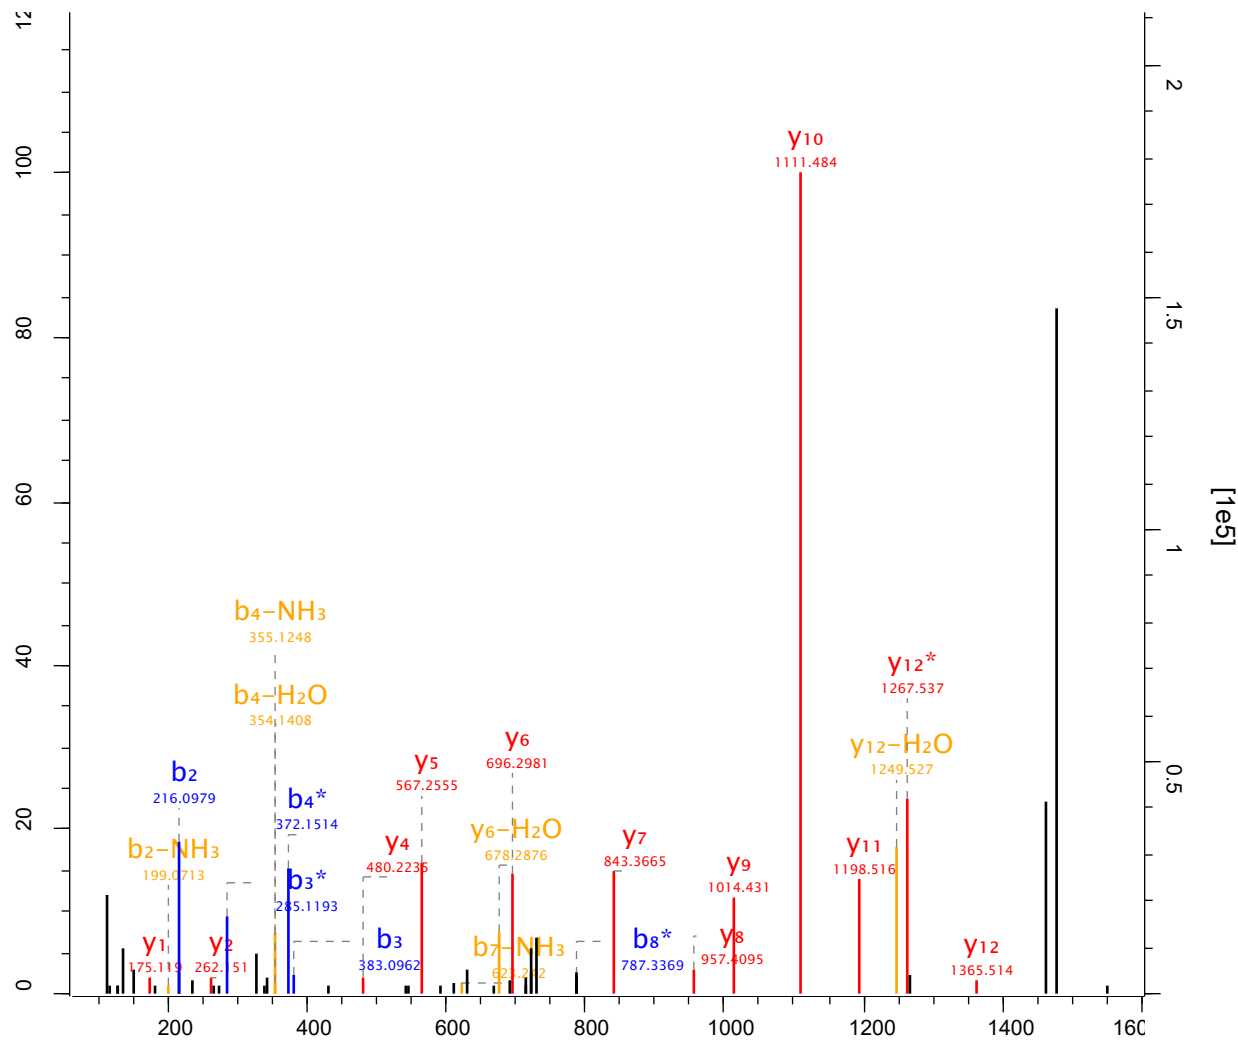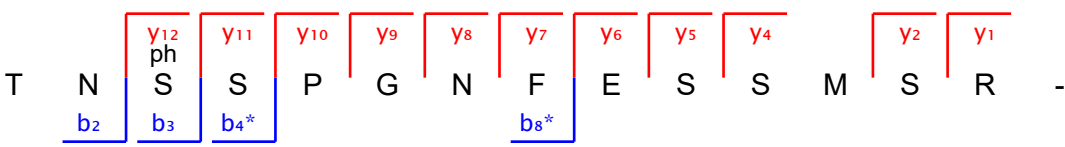

Raw file Scan Method Score m/z  
 sys\_02\_2 15819 FTMS; HCD 46.41 533.2

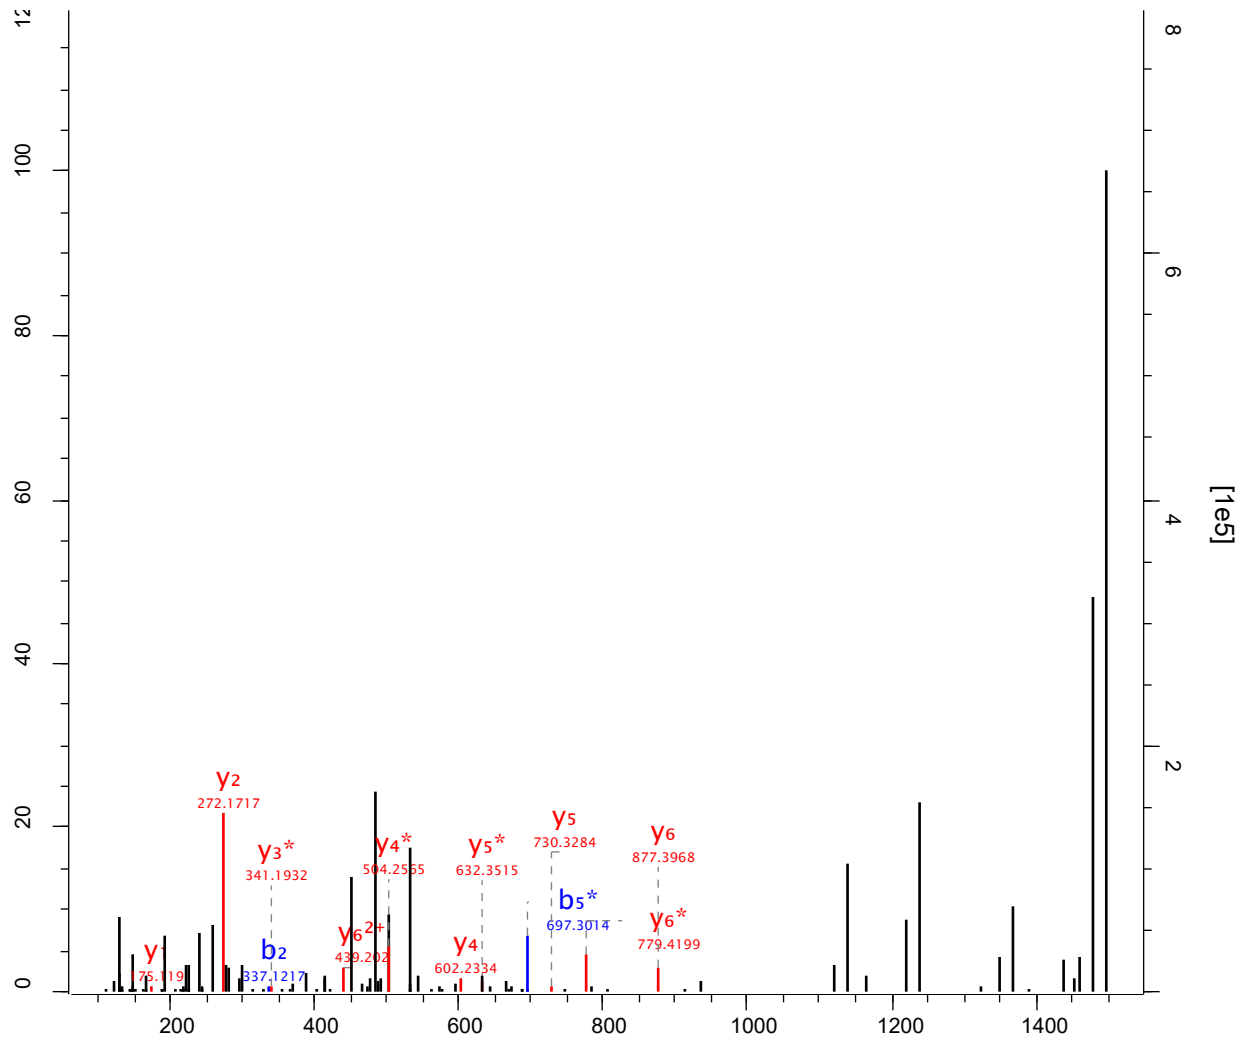

ac ox M y6 y5 y4 y3\* y2 y1  
 - F K Y S P R -  
b2 b5\*

Raw file Scan Method Score m/z  
 sys\_02\_2 15980 FTMS; HCD 66.02 675.28

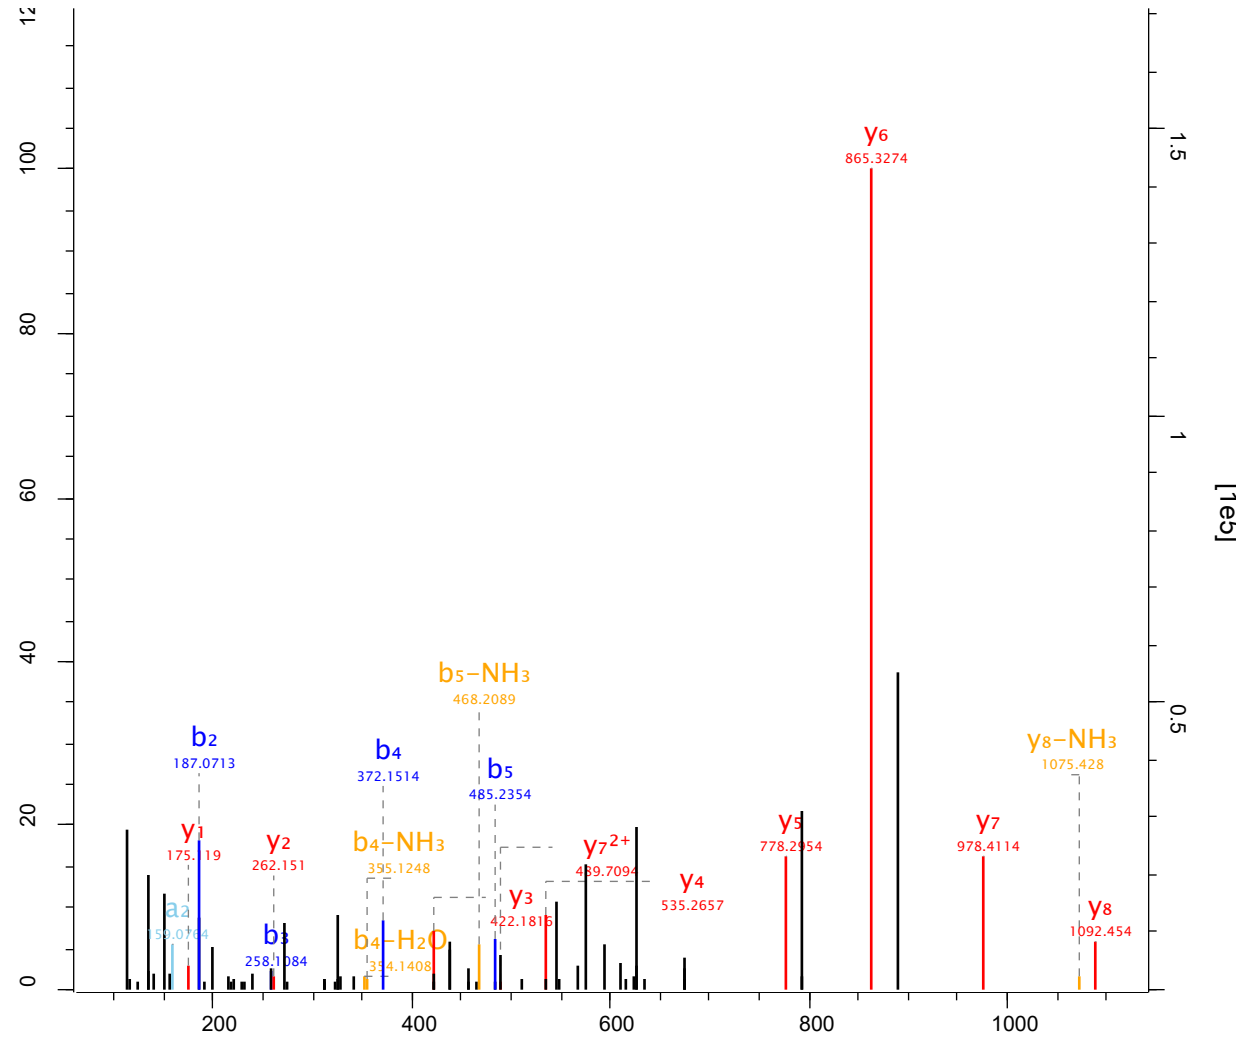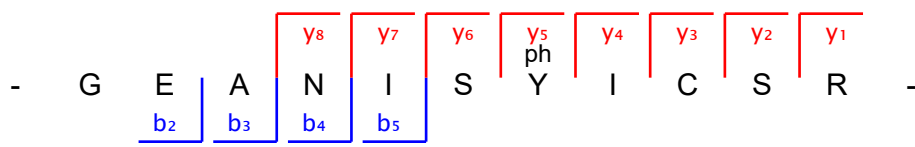

Raw file Scan Method Score m/z  
 sys\_02\_2 16047 FTMS; HCD 135.23 620.79

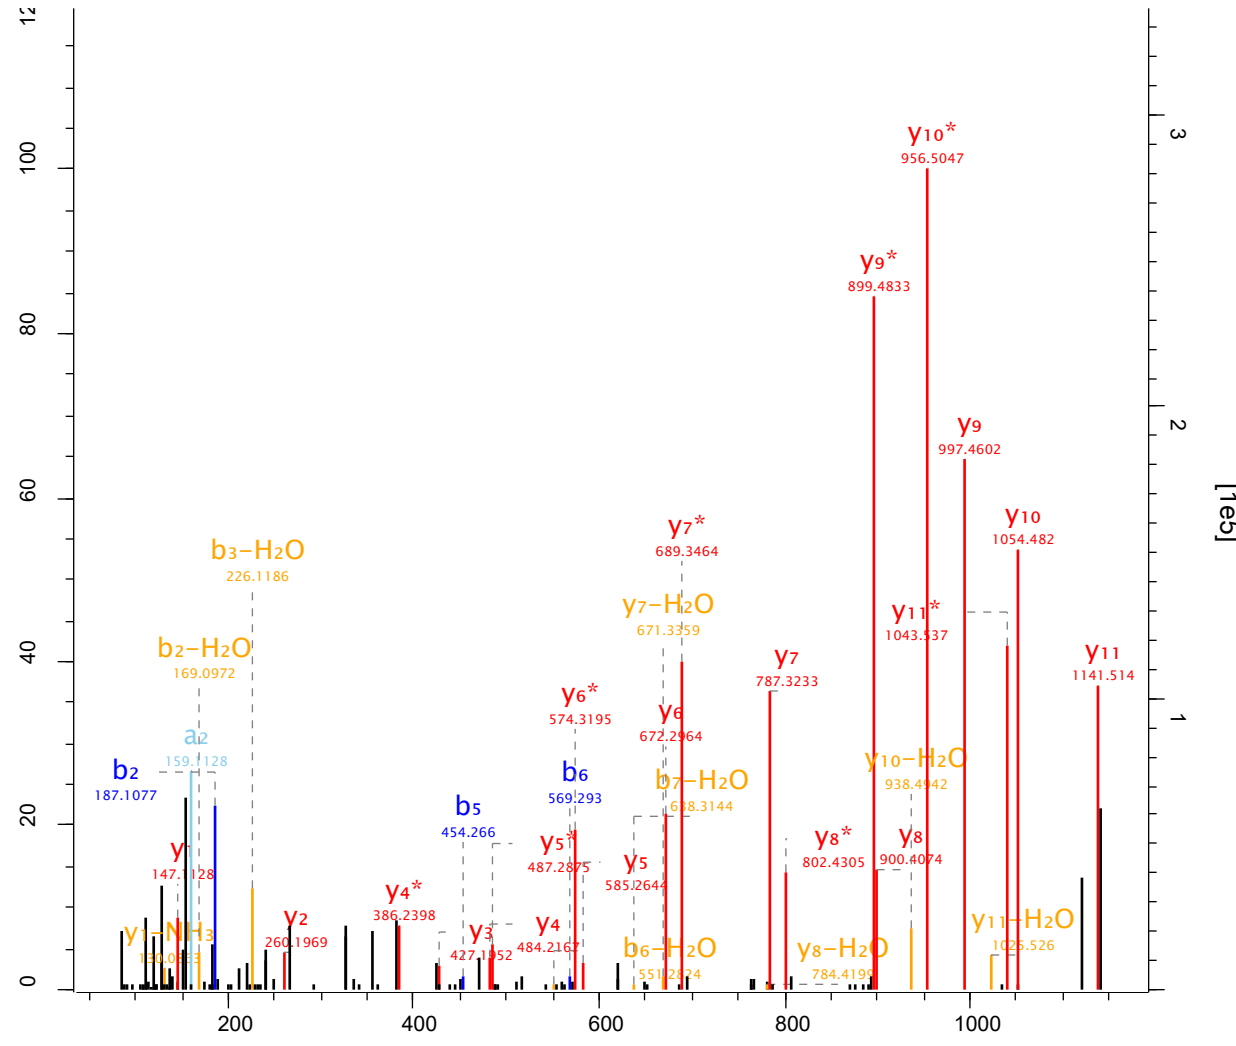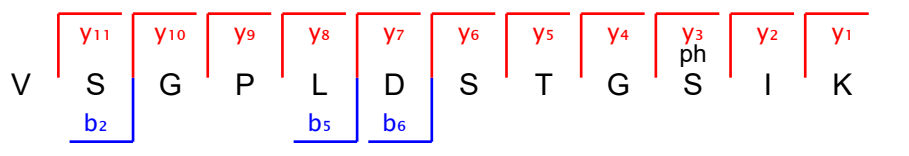

Raw file Scan Method Score m/z  
 sys\_02\_2 16060 FTMS; HCD 98.06 507.59

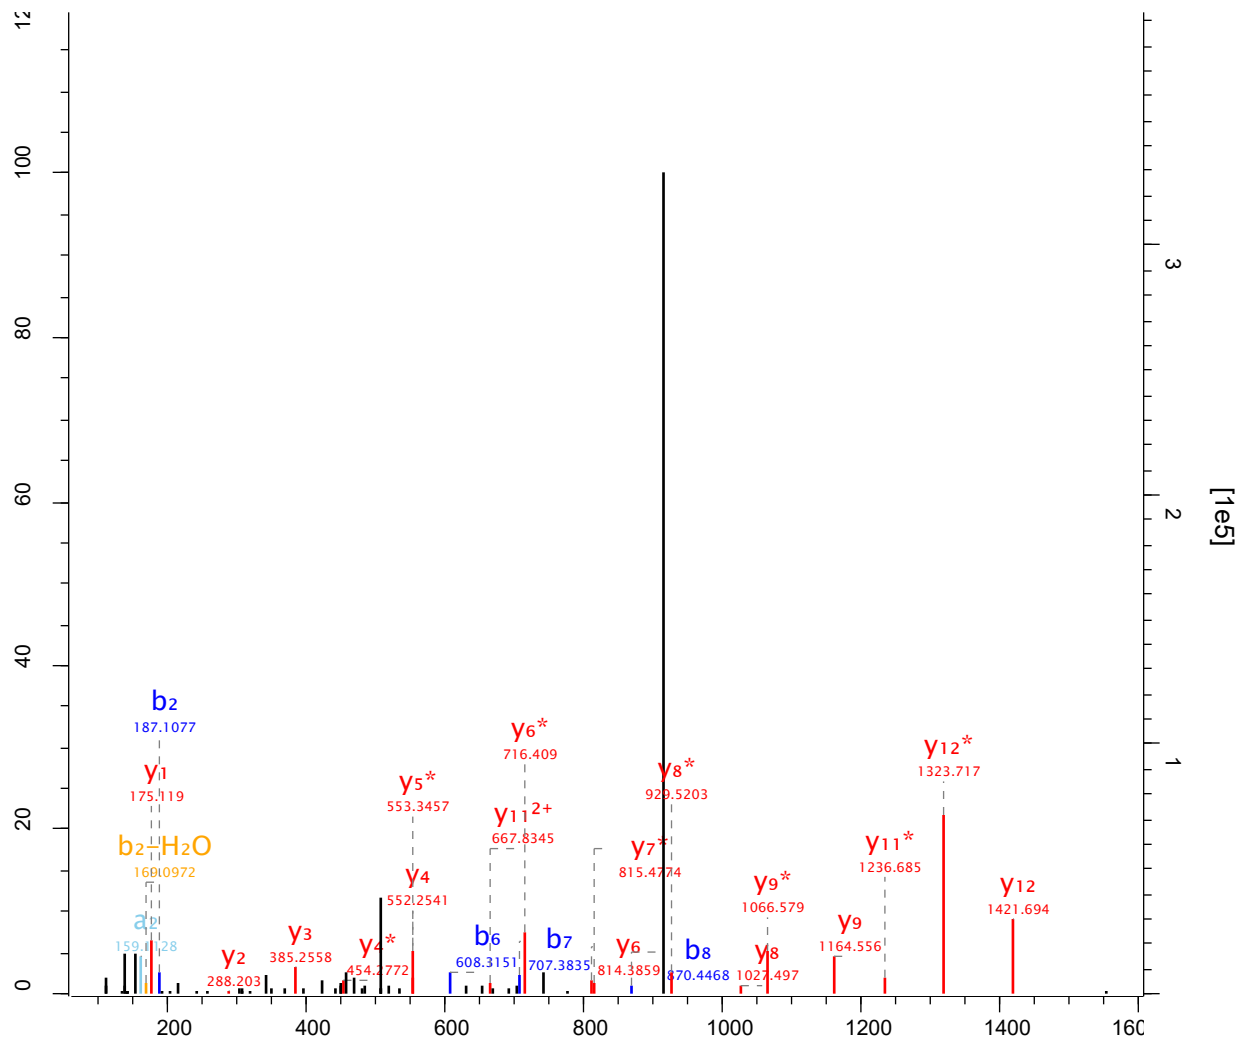

- V S A V H N V Y V S P L R -

b<sub>2</sub>
b<sub>6</sub>
b<sub>7</sub>
b<sub>8</sub>

y<sub>12</sub>
y<sub>11</sub>\*
y<sub>9</sub>
y<sub>8</sub>
y<sub>7</sub>\*
y<sub>6</sub>
y<sub>5</sub>\*
y<sub>4</sub>ph
y<sub>3</sub>
y<sub>2</sub>
y<sub>1</sub>



Raw file Scan Method Score m/z  
 sys\_02\_2 16108 FTMS; HCD 257.58 557.27

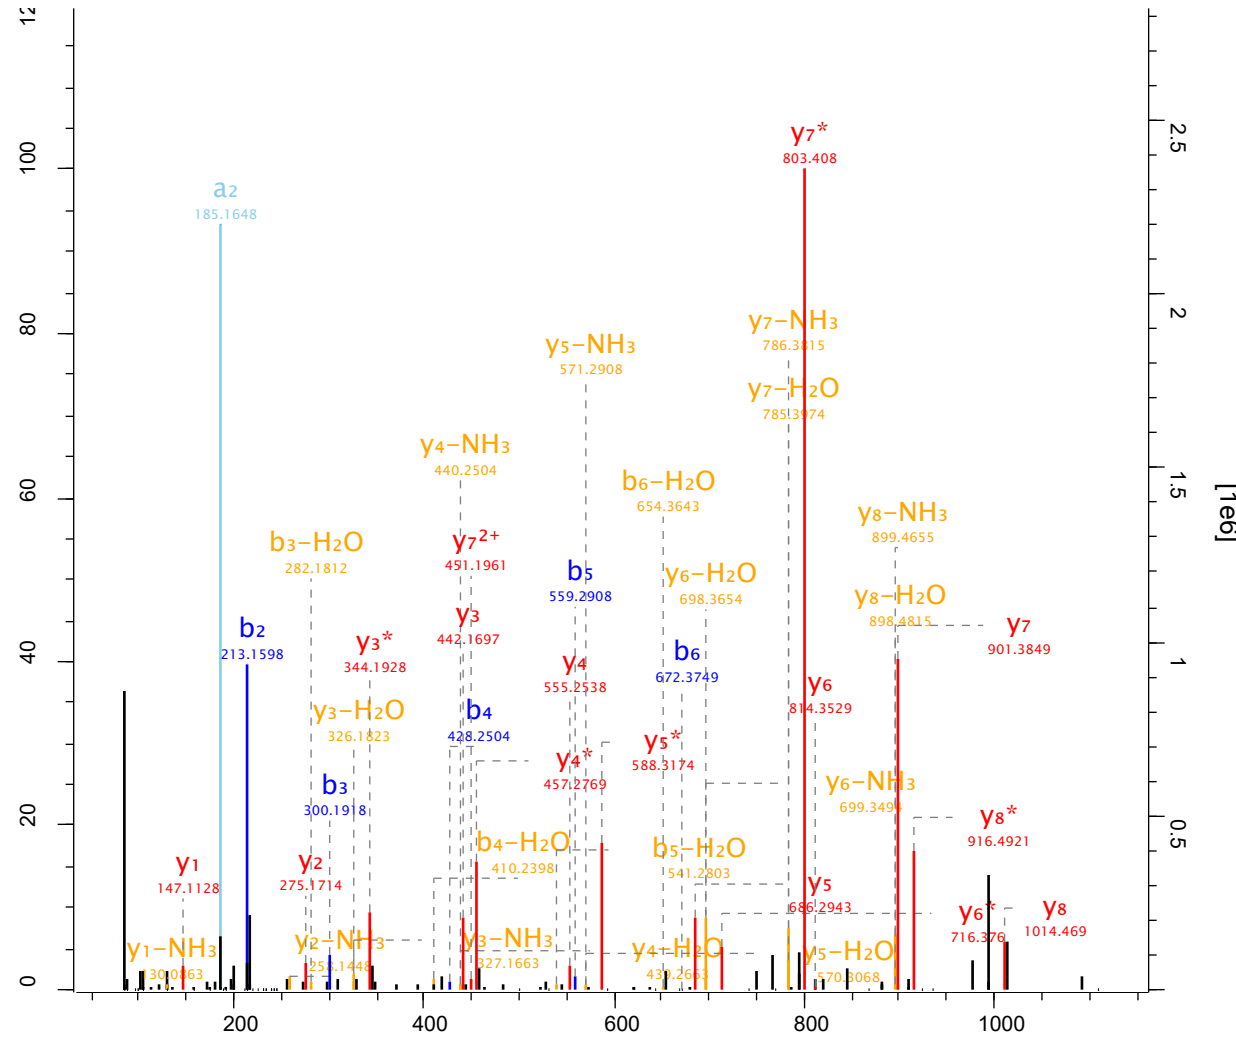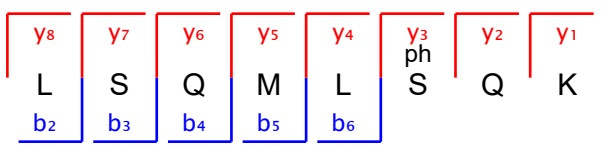

Raw file Scan Method Score m/z  
 sys\_02\_2 16141 FTMS; HCD 98.94 540.76

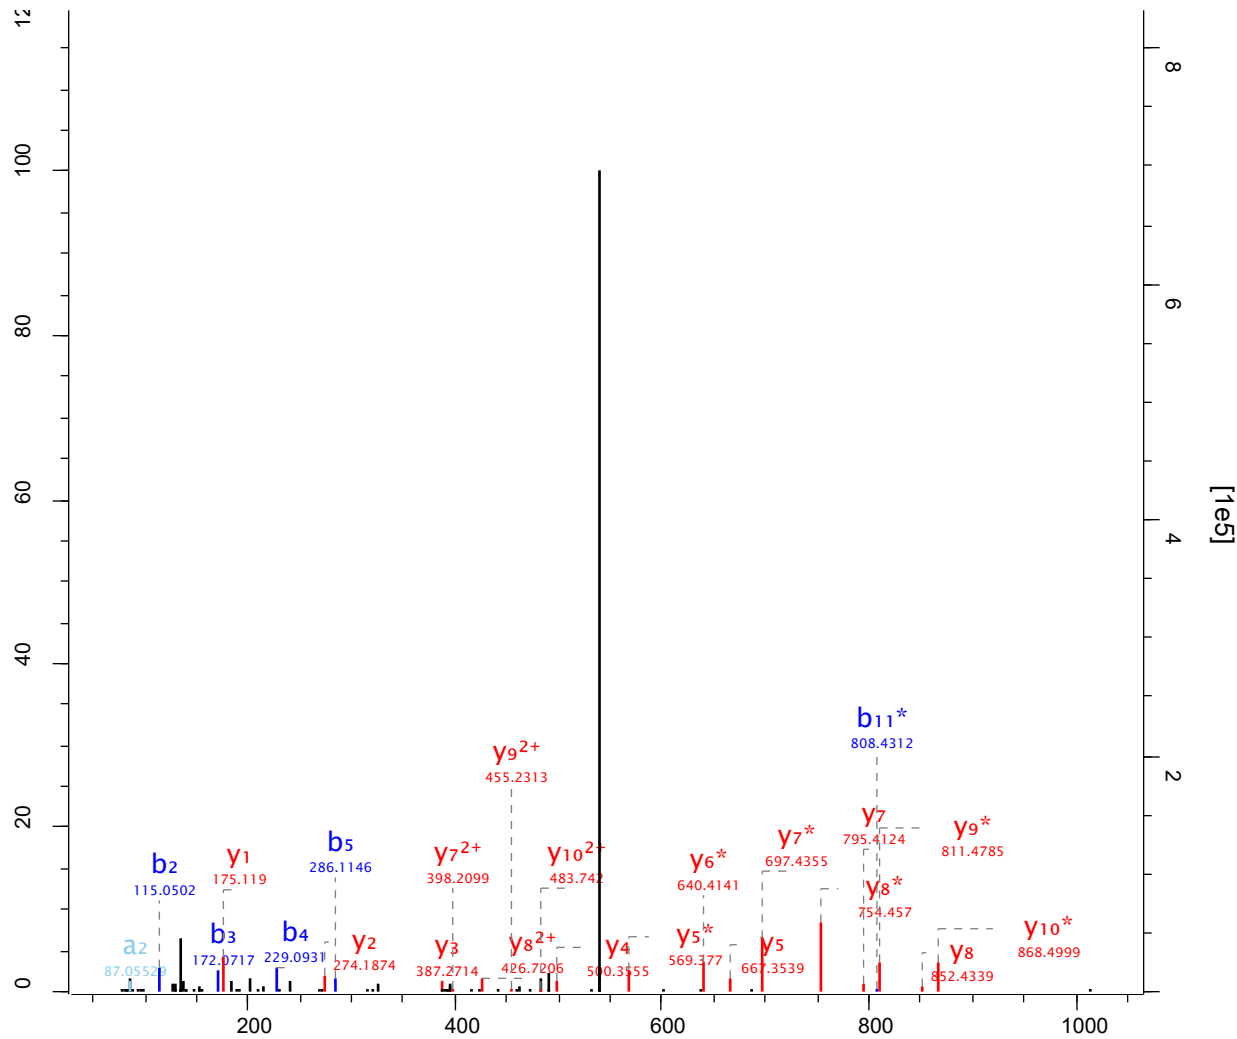

- G G G G G G A S L L V R -

Fragmentation mapping (b and y ions):

- b<sub>2</sub> (G)
- b<sub>3</sub> (G)
- b<sub>4</sub> (G)
- b<sub>5</sub> (G)
- y<sub>1</sub> (R)
- y<sub>2</sub> (V)
- y<sub>3</sub> (L)
- y<sub>4</sub> (L)
- y<sub>5</sub> (S)
- y<sub>6</sub> (A)
- y<sub>7</sub> (G)
- y<sub>8</sub> (G)
- y<sub>9</sub> (G)
- y<sub>10</sub> (G)
- b<sub>11</sub> (V)

Raw file Scan Method Score m/z  
 sys\_02\_2 16209 FTMS; HCD 57.11 416.55

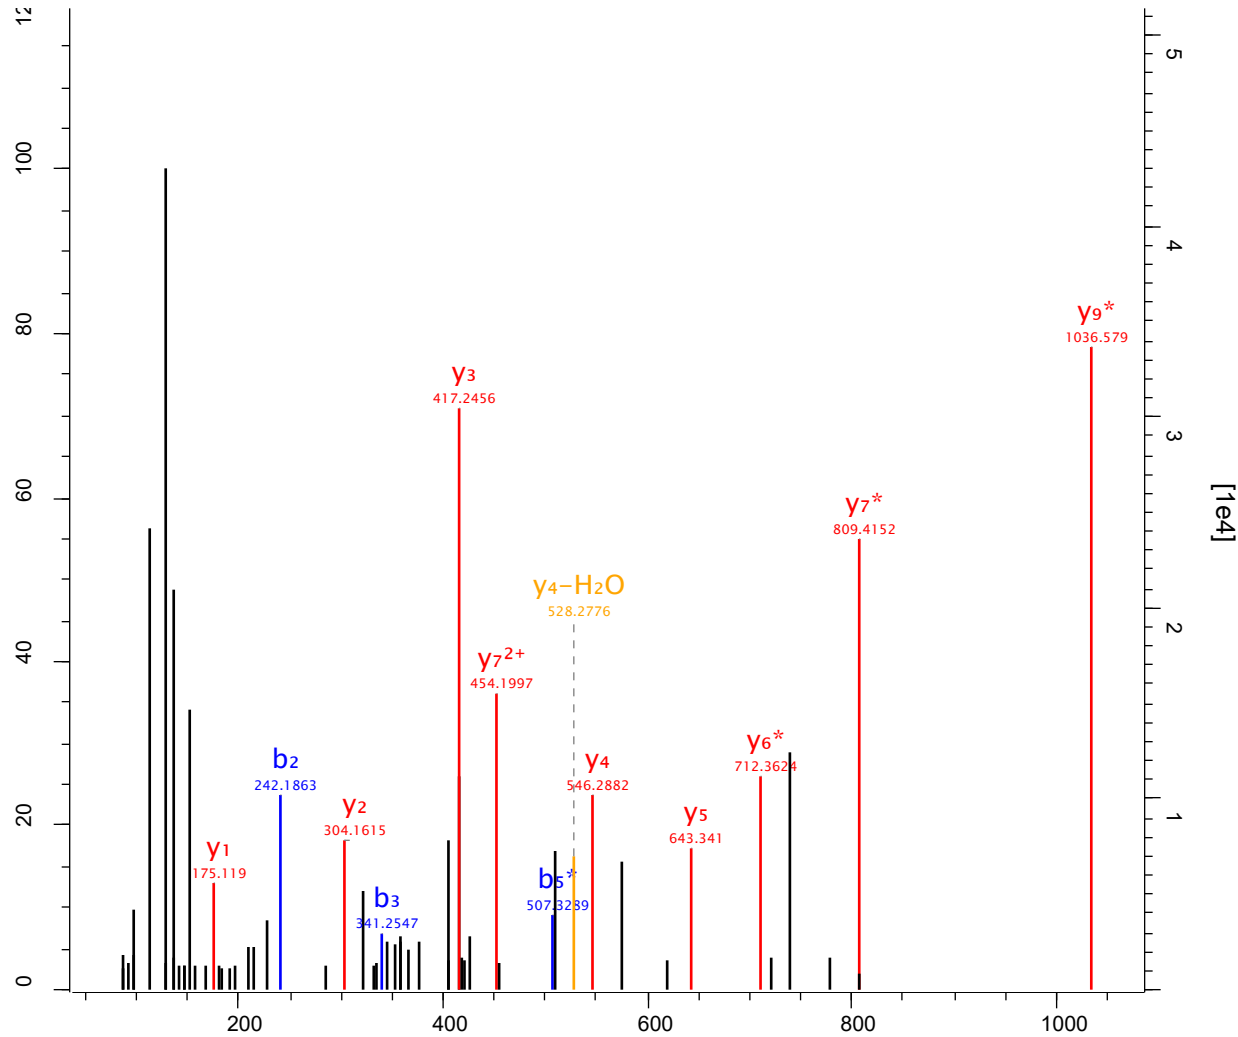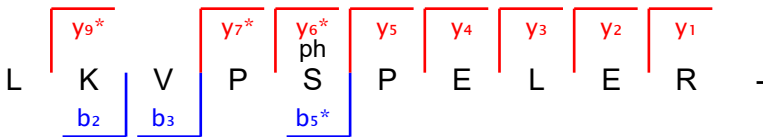

Raw file Scan Method Score m/z  
 sys\_02\_2 1630 FTMS; HCD 41.68 450.22

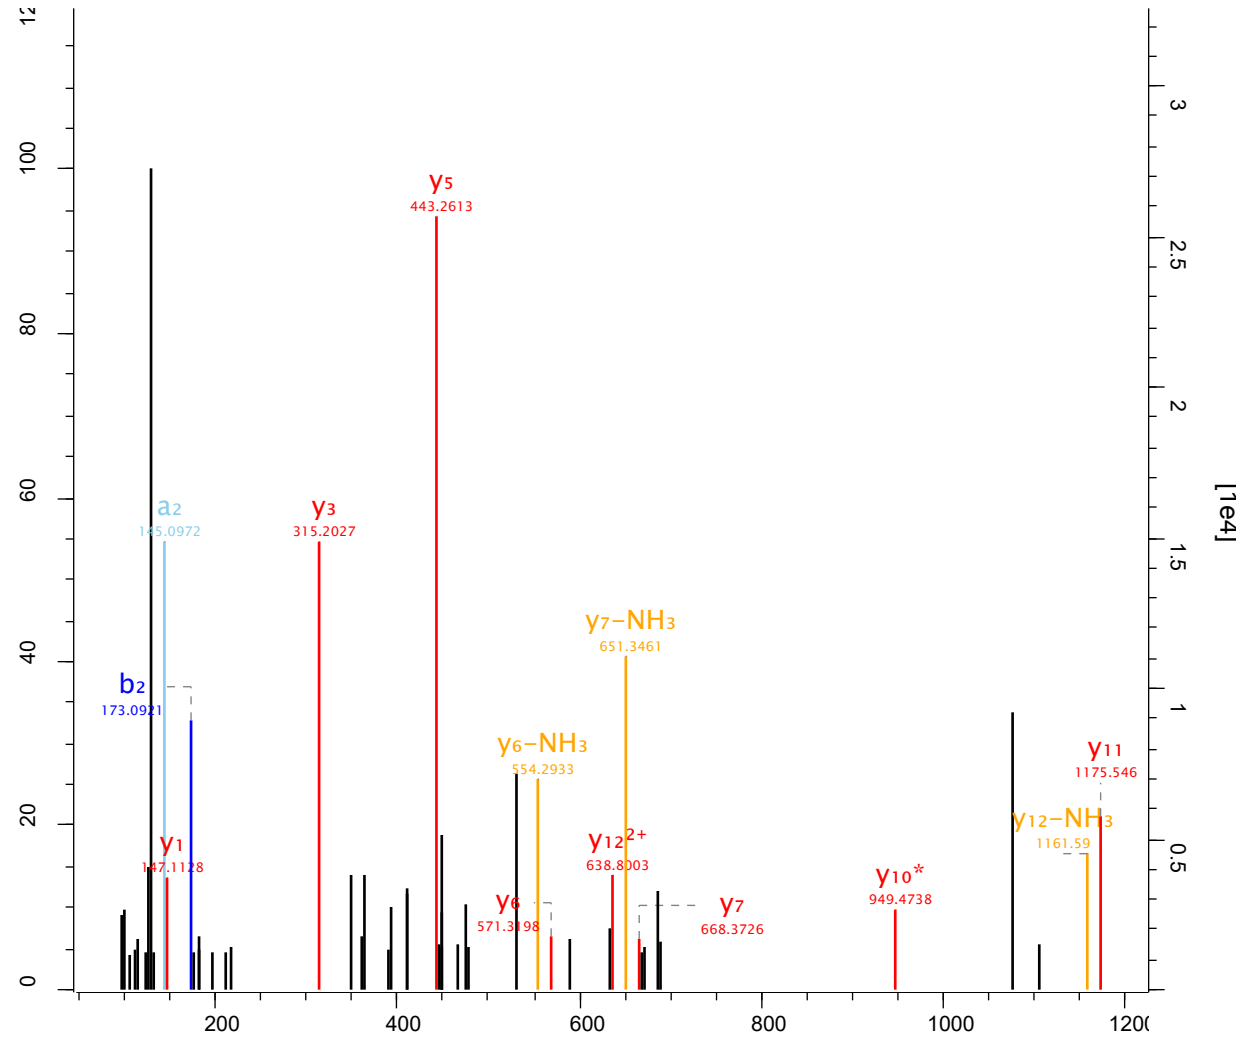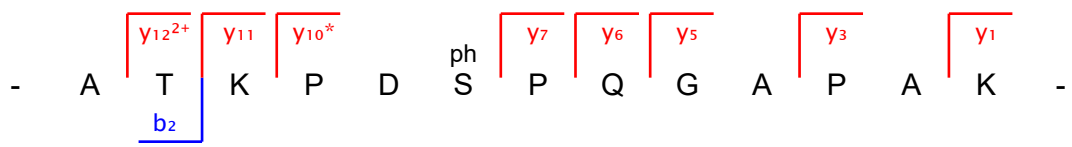

| Raw file | Scan  | Method    | Score | m/z    |
|----------|-------|-----------|-------|--------|
| sys_02_2 | 16381 | FTMS; HCD | 43.3  | 421.88 |

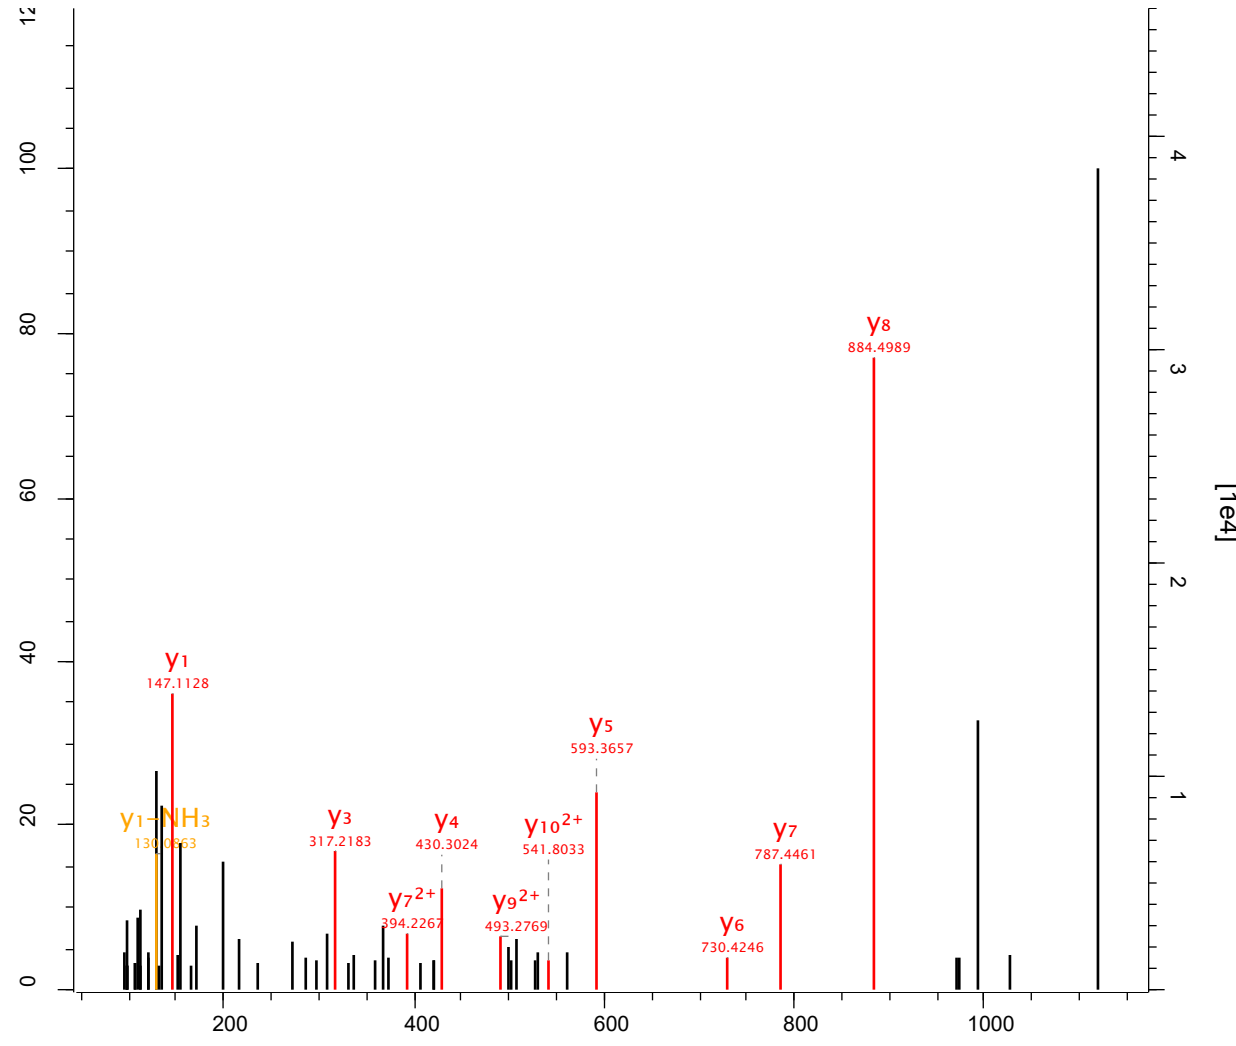

ph  
 - T P T P G H Y L G L K -

$y_{10}^{2+}$   $y_9^{2+}$   $y_8$   $y_7$   $y_6$   $y_5$   $y_4$   $y_3$   $y_1$

Raw file Scan Method Score m/z  
 sys\_02\_2 16438 FTMS; HCD 81.66 727.82

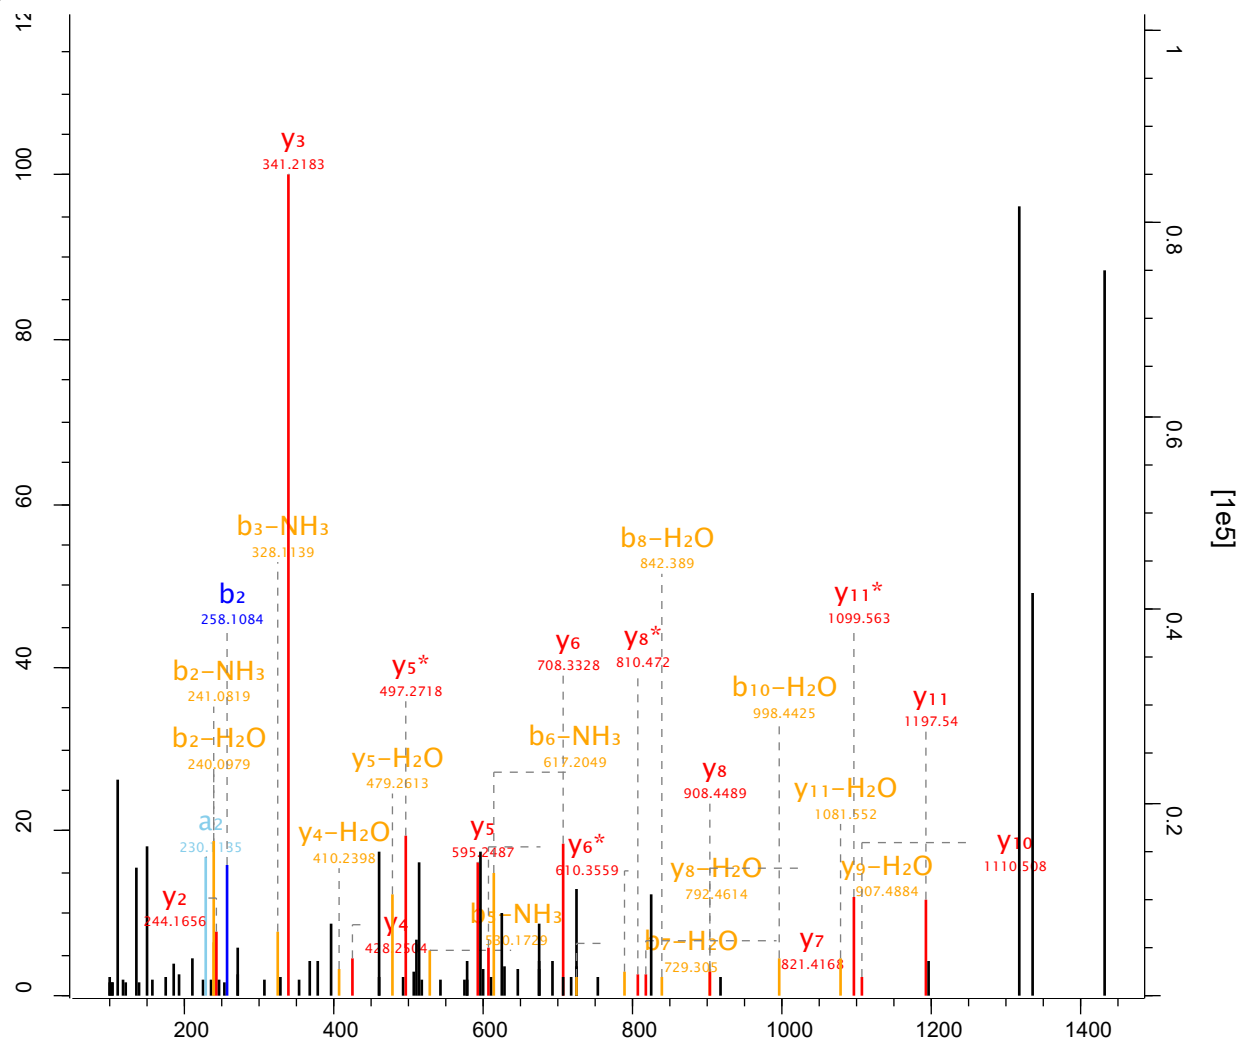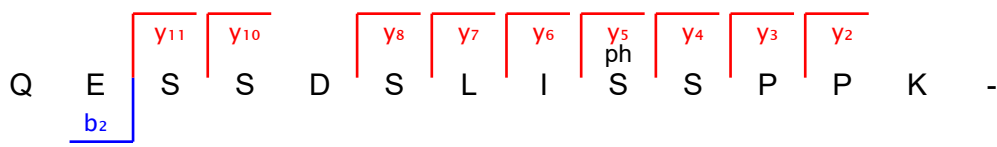

Raw file Scan Method Score m/z  
 sys\_02\_2 16870 FTMS; HCD 102.65 672.79

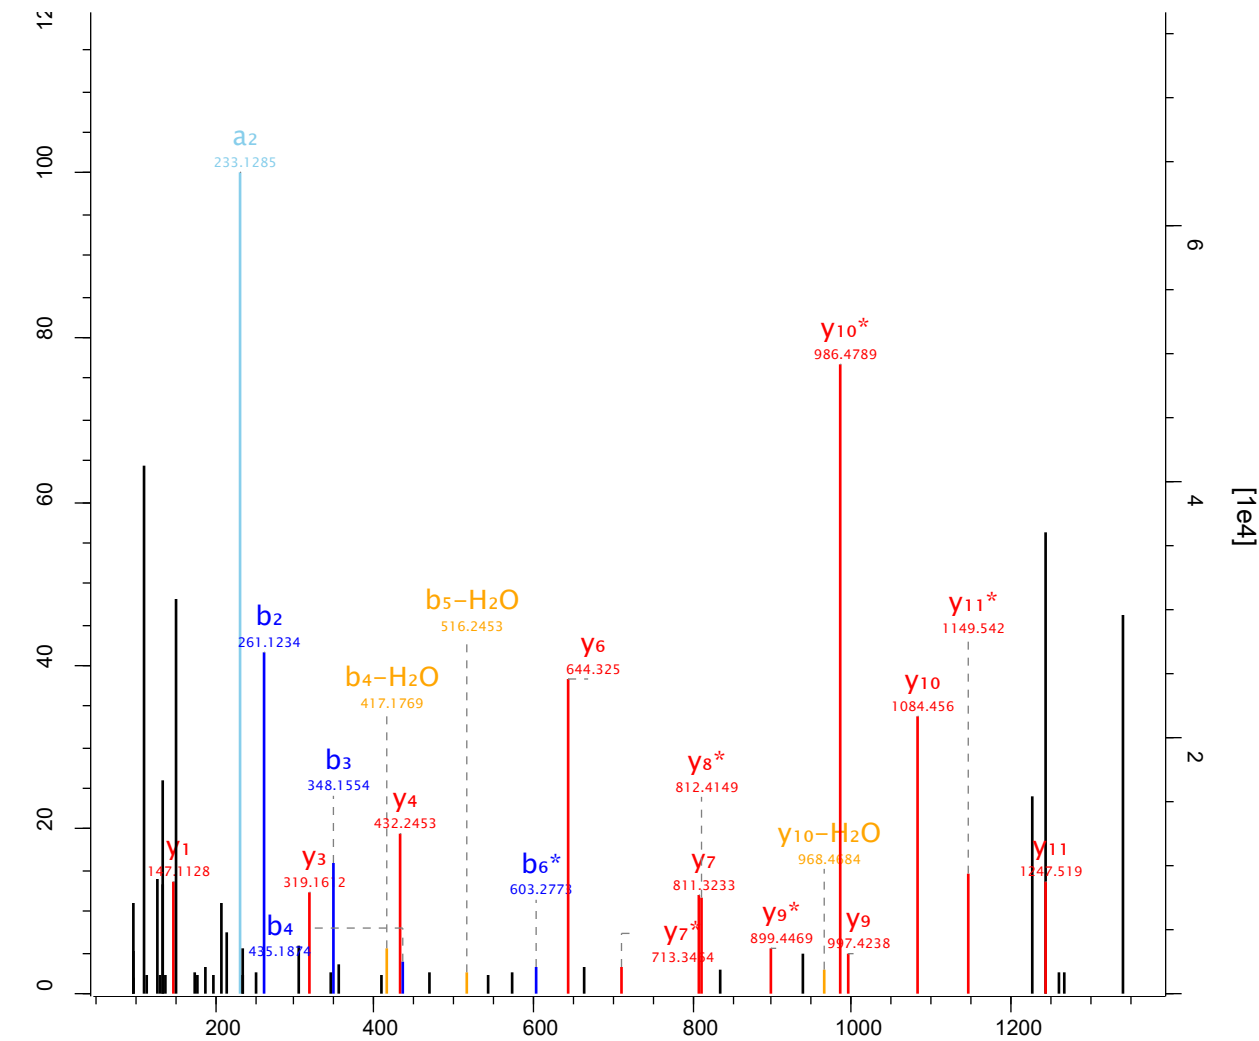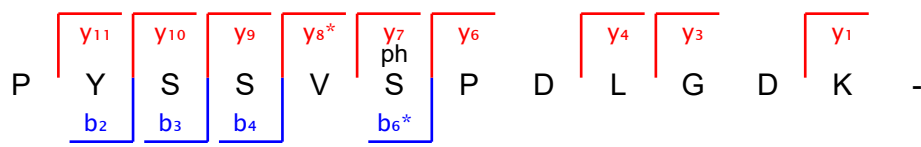

Raw file Scan Method Score m/z  
 sys\_02\_2 16985 FTMS; HCD 60.8 689.31

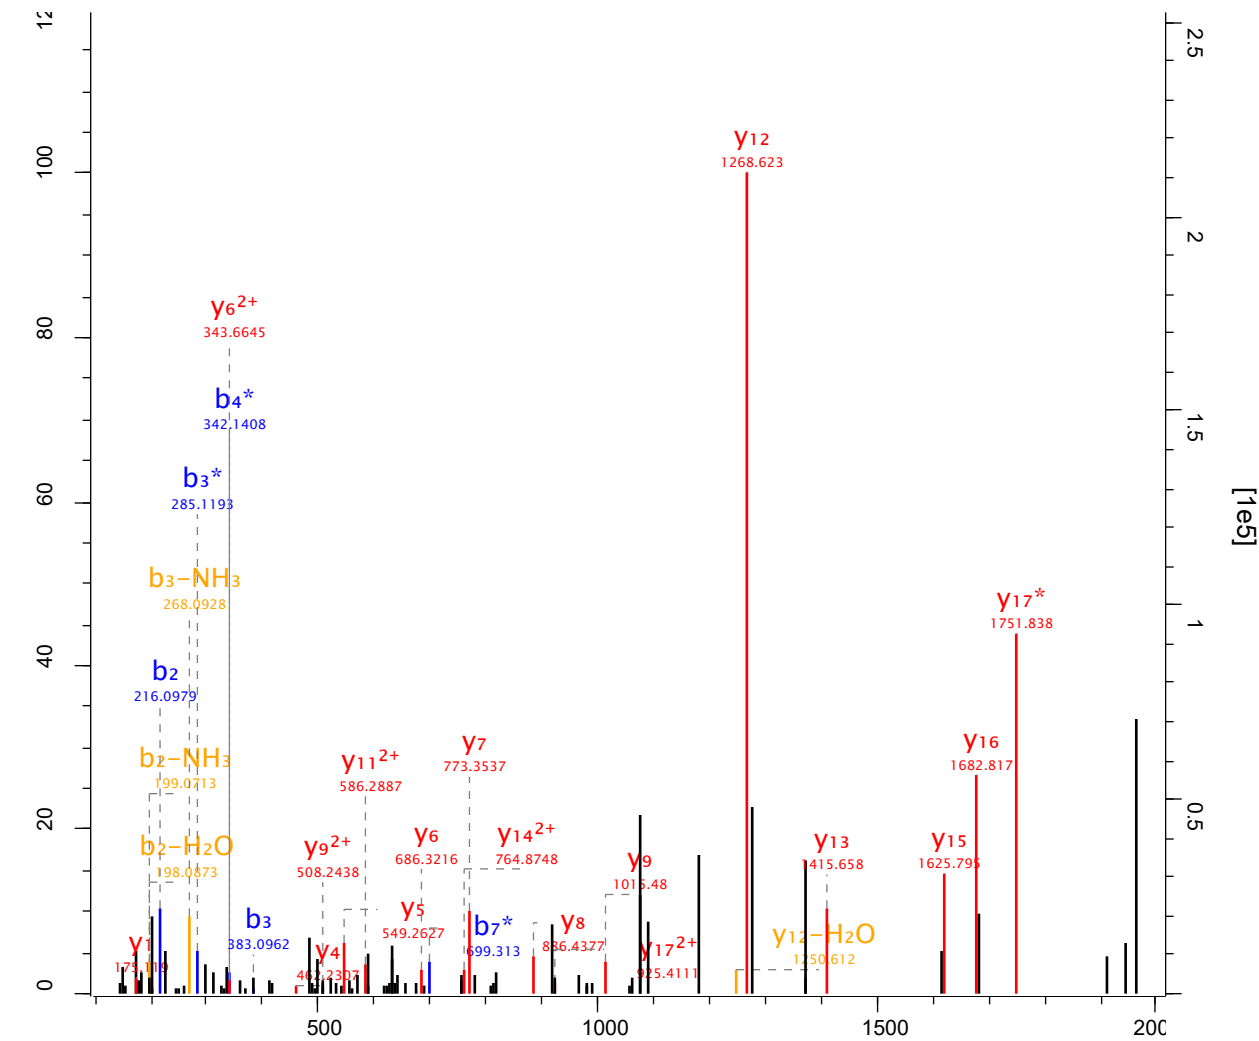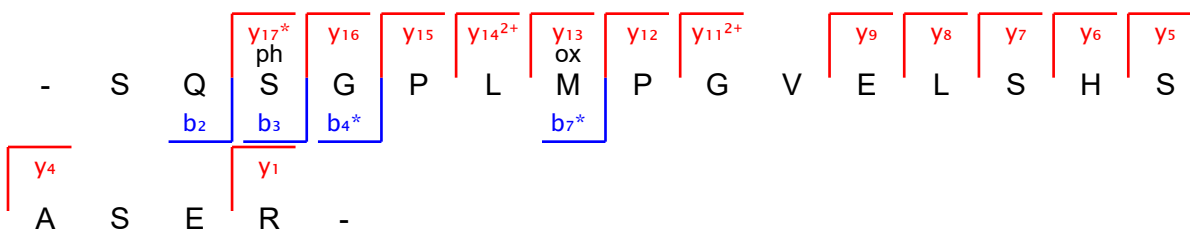



Raw file Scan Method Score m/z  
 sys\_02\_2 17105 FTMS; HCD 80.36 712

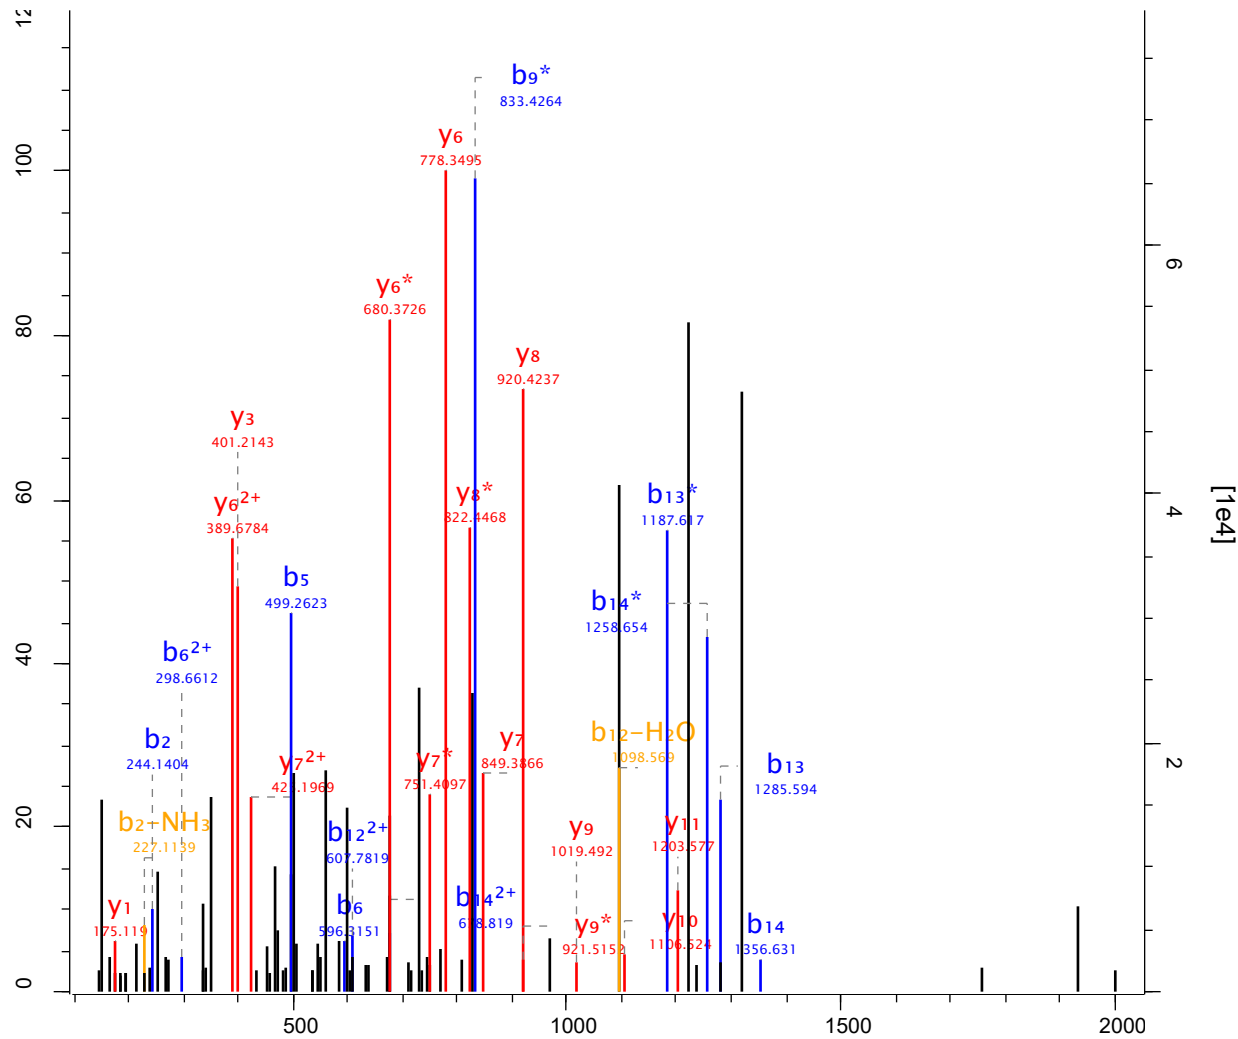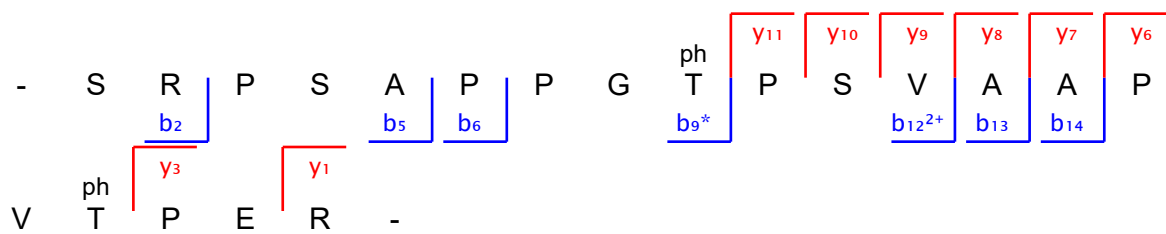

Raw file Scan Method Score m/z  
 sys\_02\_2 17108 FTMS; HCD 144.2 574.26

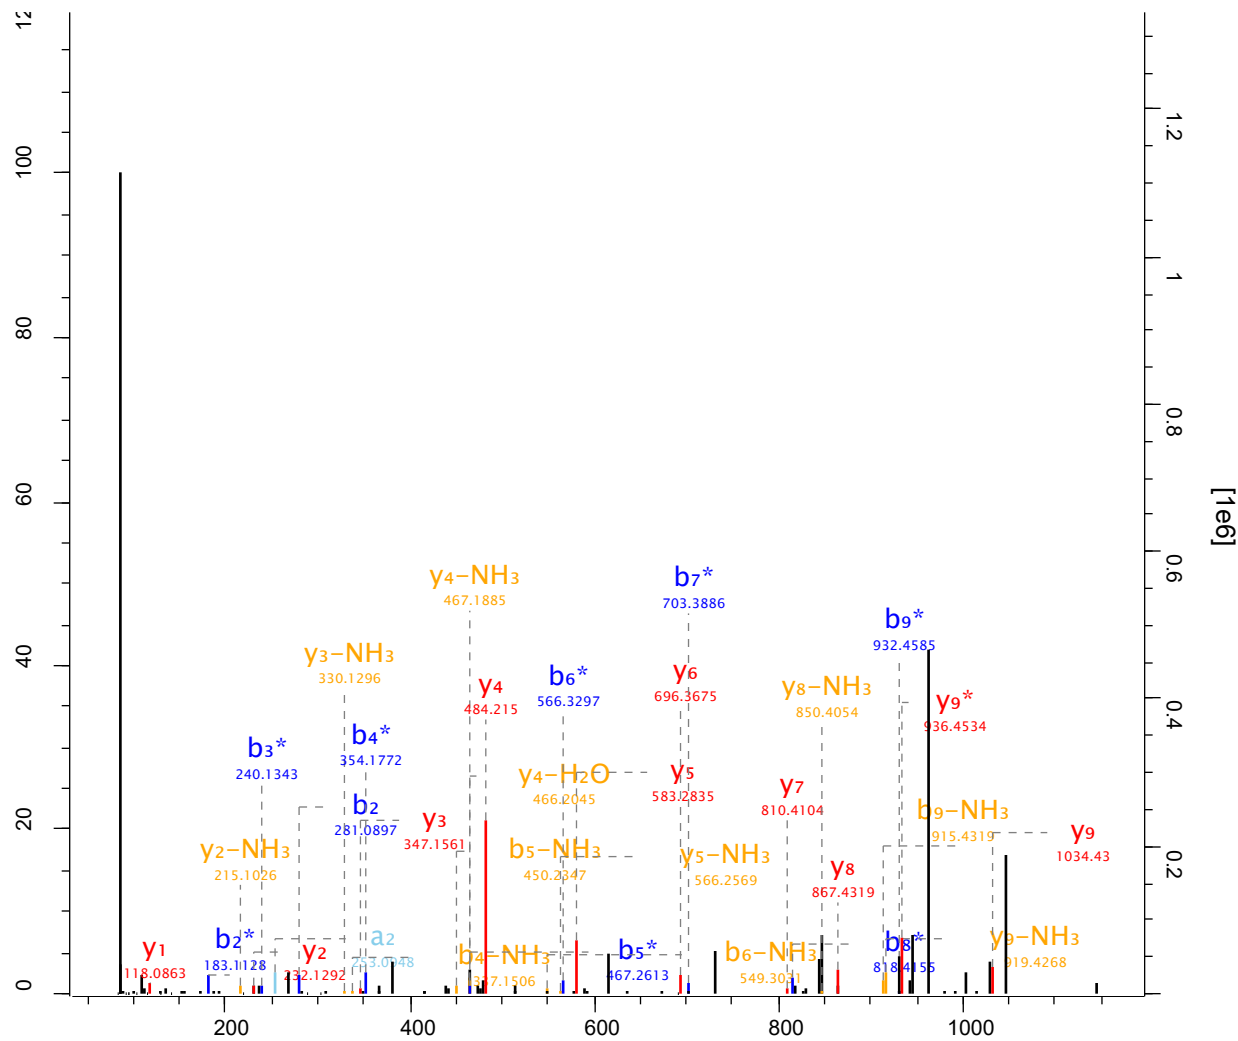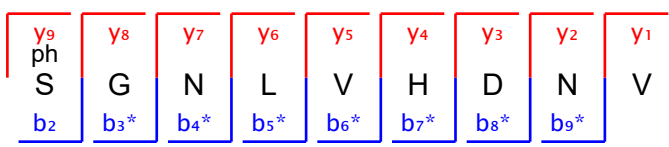

Raw file Scan Method Score m/z  
 sys\_02\_2 17225 FTMS; HCD 73.5 635.26

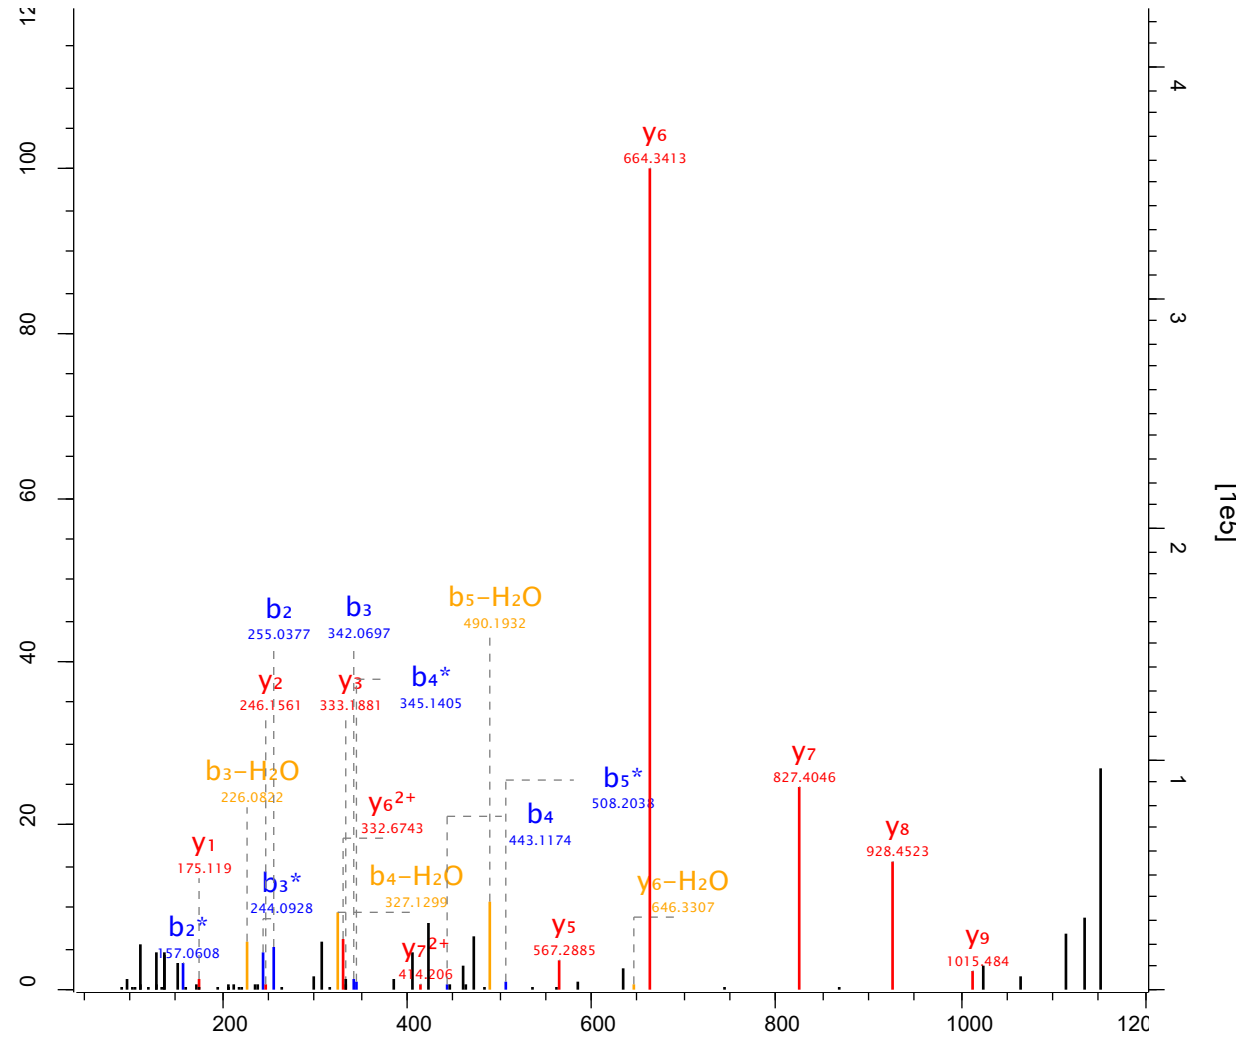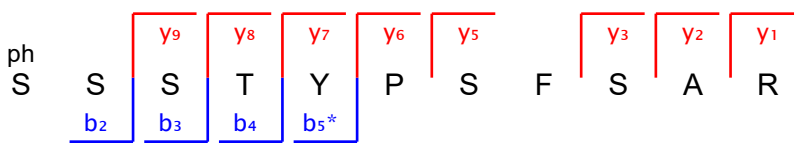

Raw file Scan Method Score m/z  
 sys\_02\_2 17233 FTMS; HCD 137.64 913.9

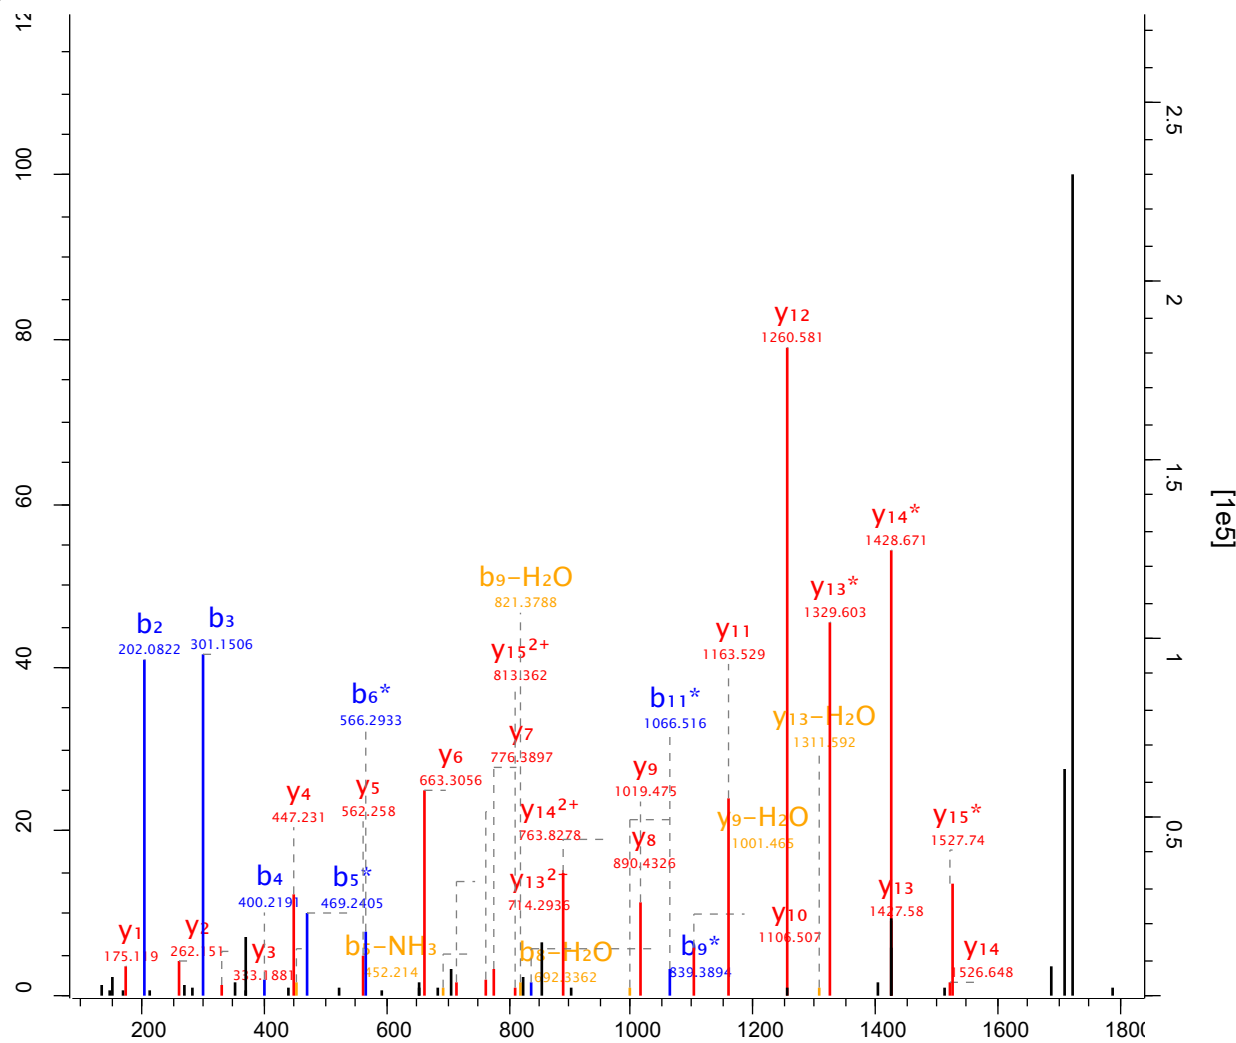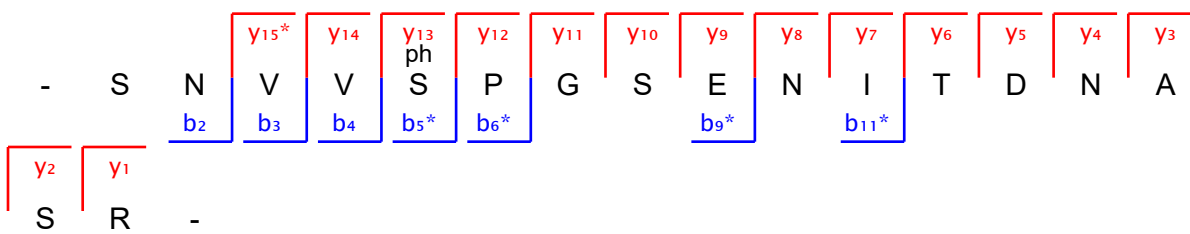

Raw file Scan Method Score m/z  
 sys\_02\_2 17287 FTMS; HCD 260.97 865.85

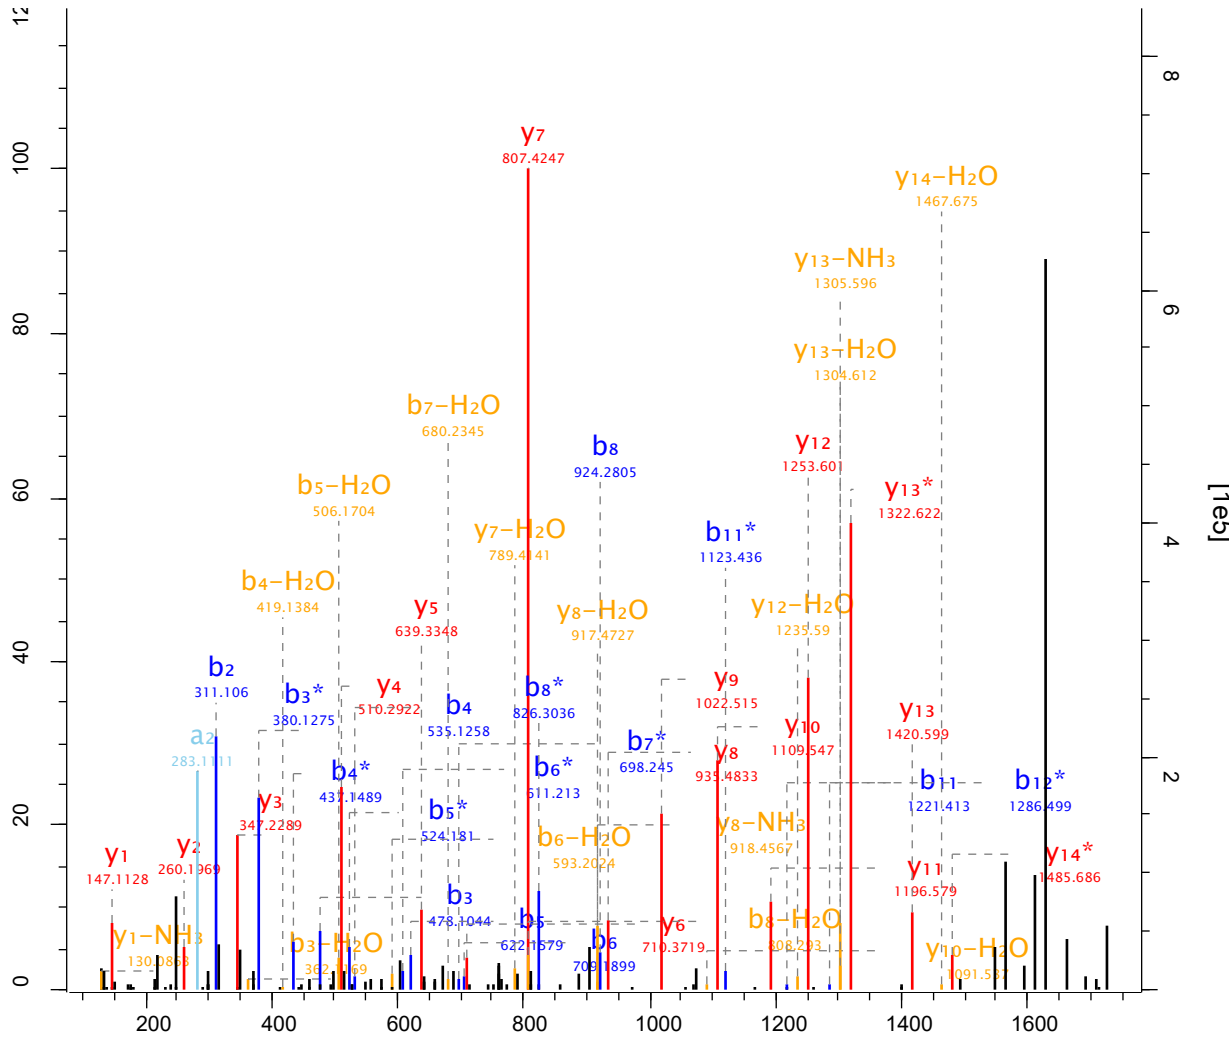

|    |      |     |     |     |     |     |    |    |    |     |      |    |    |    |
|----|------|-----|-----|-----|-----|-----|----|----|----|-----|------|----|----|----|
| ox | y14* | y13 | y12 | y11 | y10 | y9  | y8 | y7 | y6 | y5  | y4   | y3 | y2 | y1 |
| M  | Y    | ph  | G   | S   | S   | S   | Q  | P  | A  | E   | Y    | S  | L  | K  |
|    | b2   | b3  | b4  | b5  | b6  | b7* | b8 |    |    | b11 | b12* |    |    |    |

Raw file Scan Method Score m/z  
 sys\_02\_2 17409 FTMS; HCD 42.52 631.83

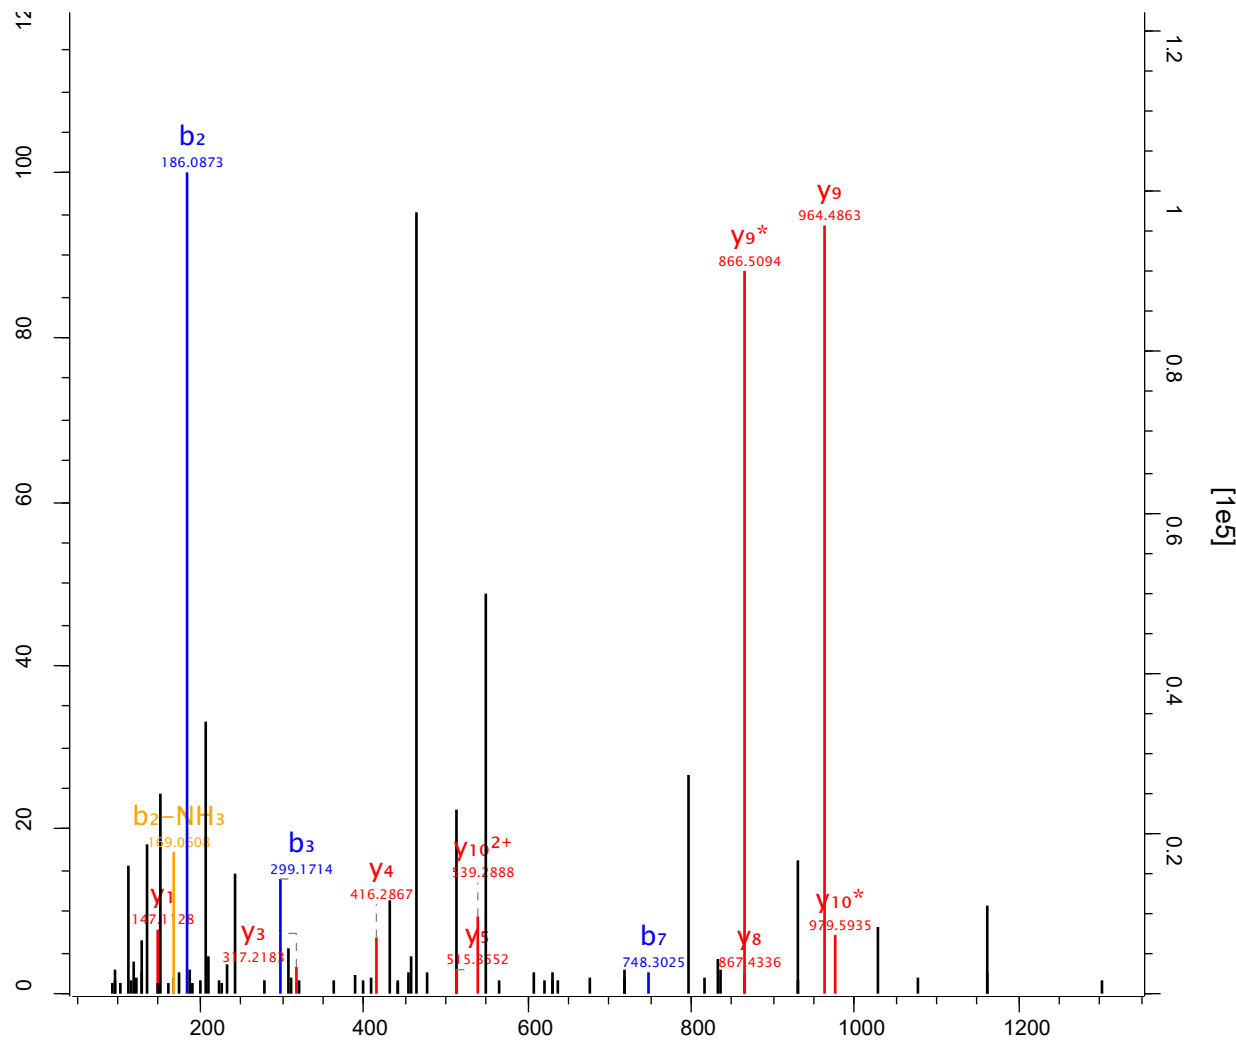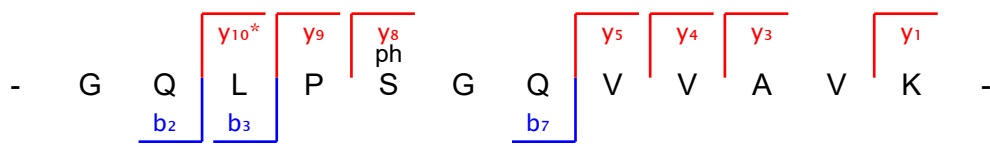

Raw file Scan Method Score m/z  
 sys\_02\_2 17513 FTMS; HCD 171.08 607.78

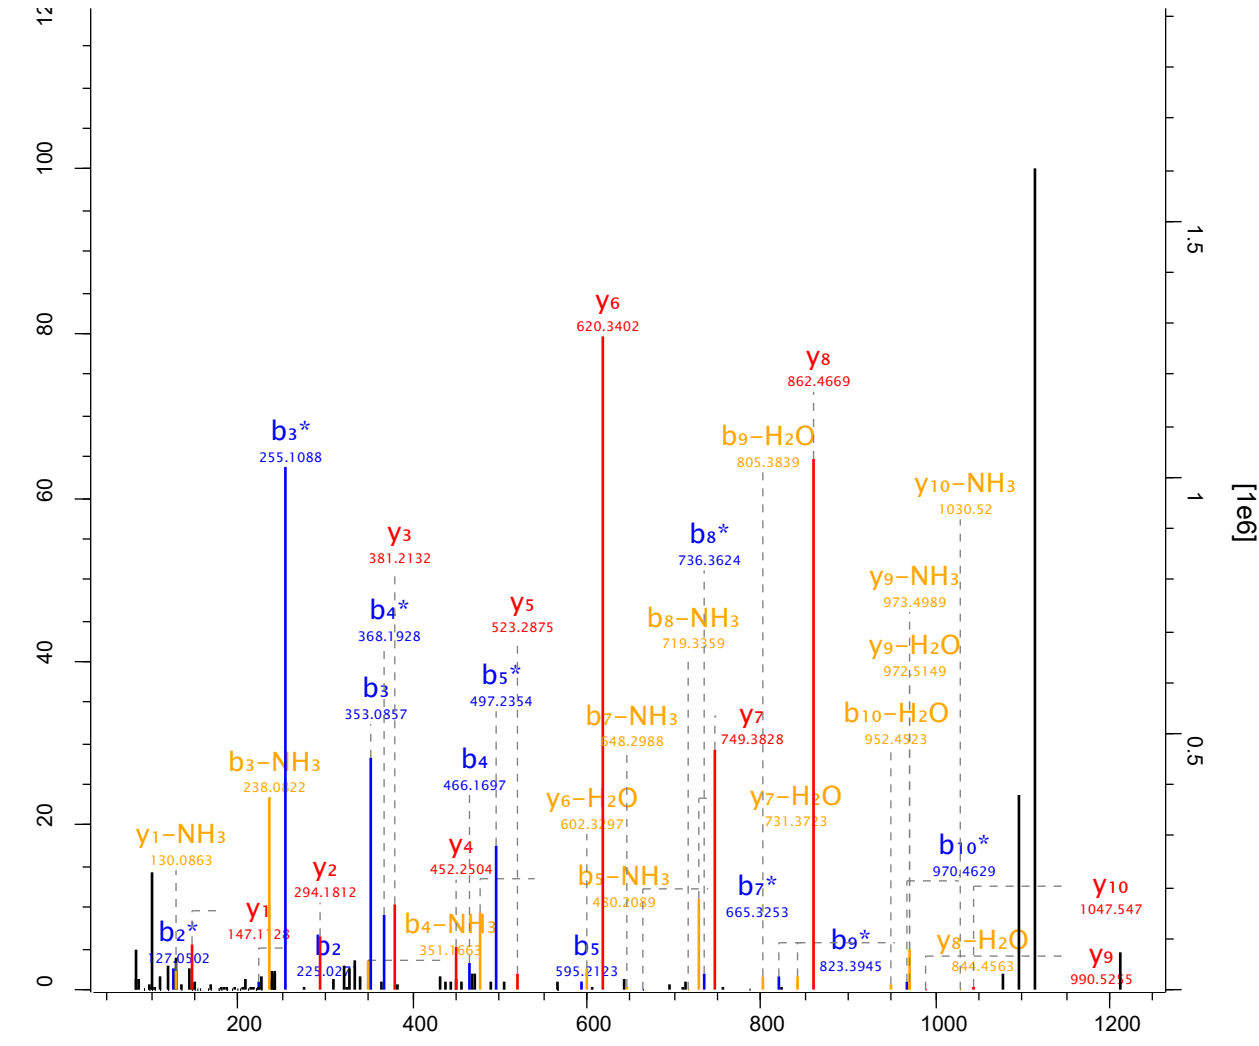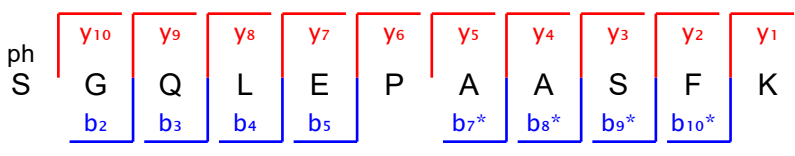

Raw file Scan Method Score m/z  
 sys\_02\_2 17756 FTMS; HCD 318.08 923.42

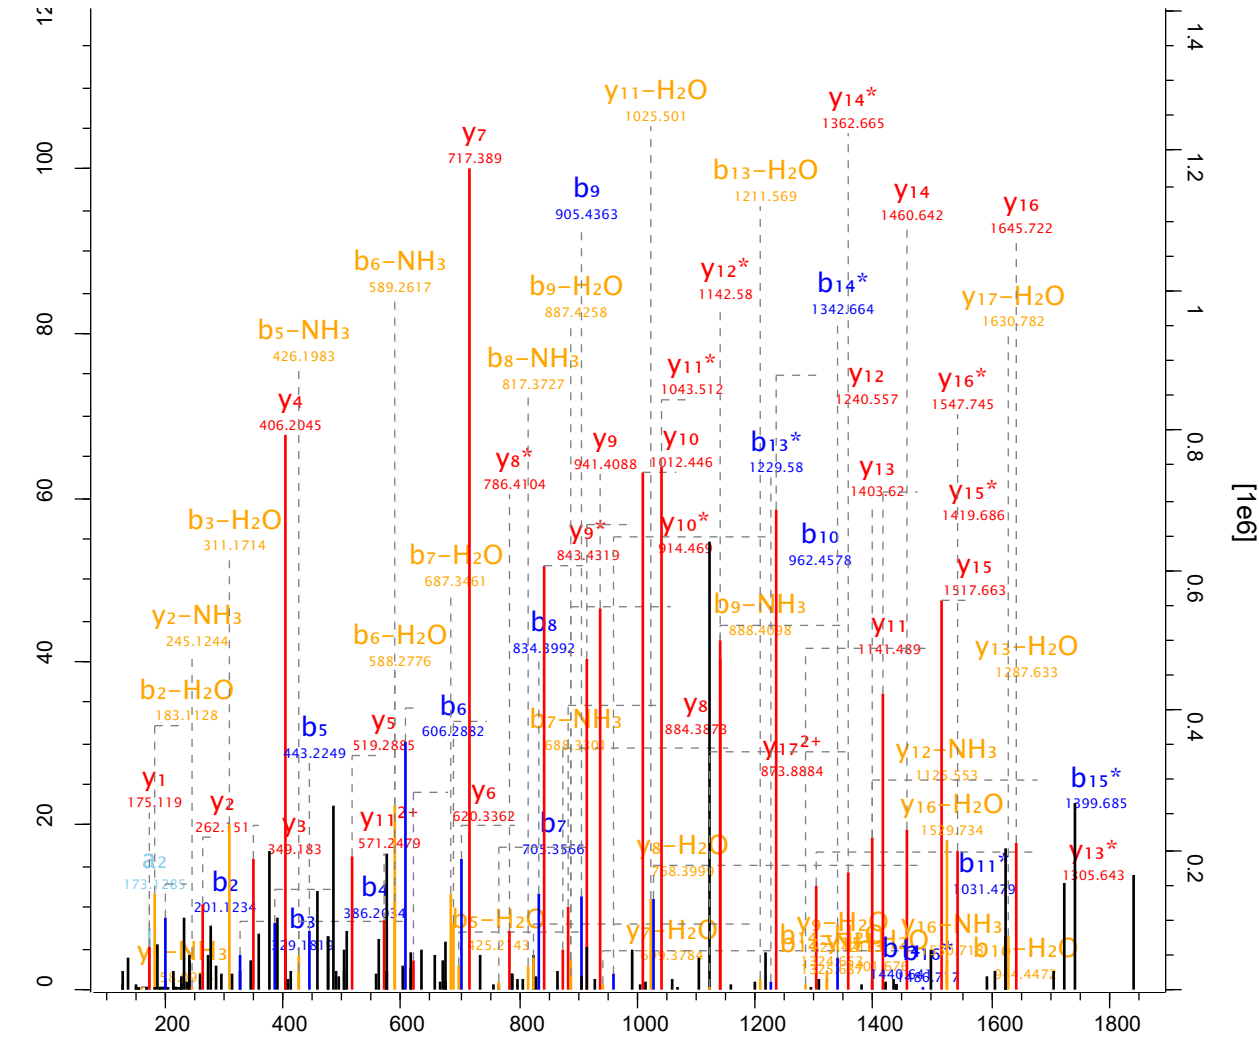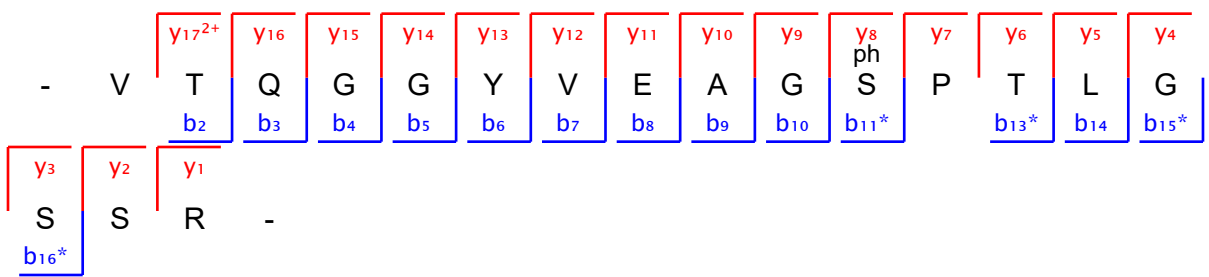



Raw file Scan Method Score m/z  
 sys\_02\_2 18161 FTMS; HCD 45.35 799.38

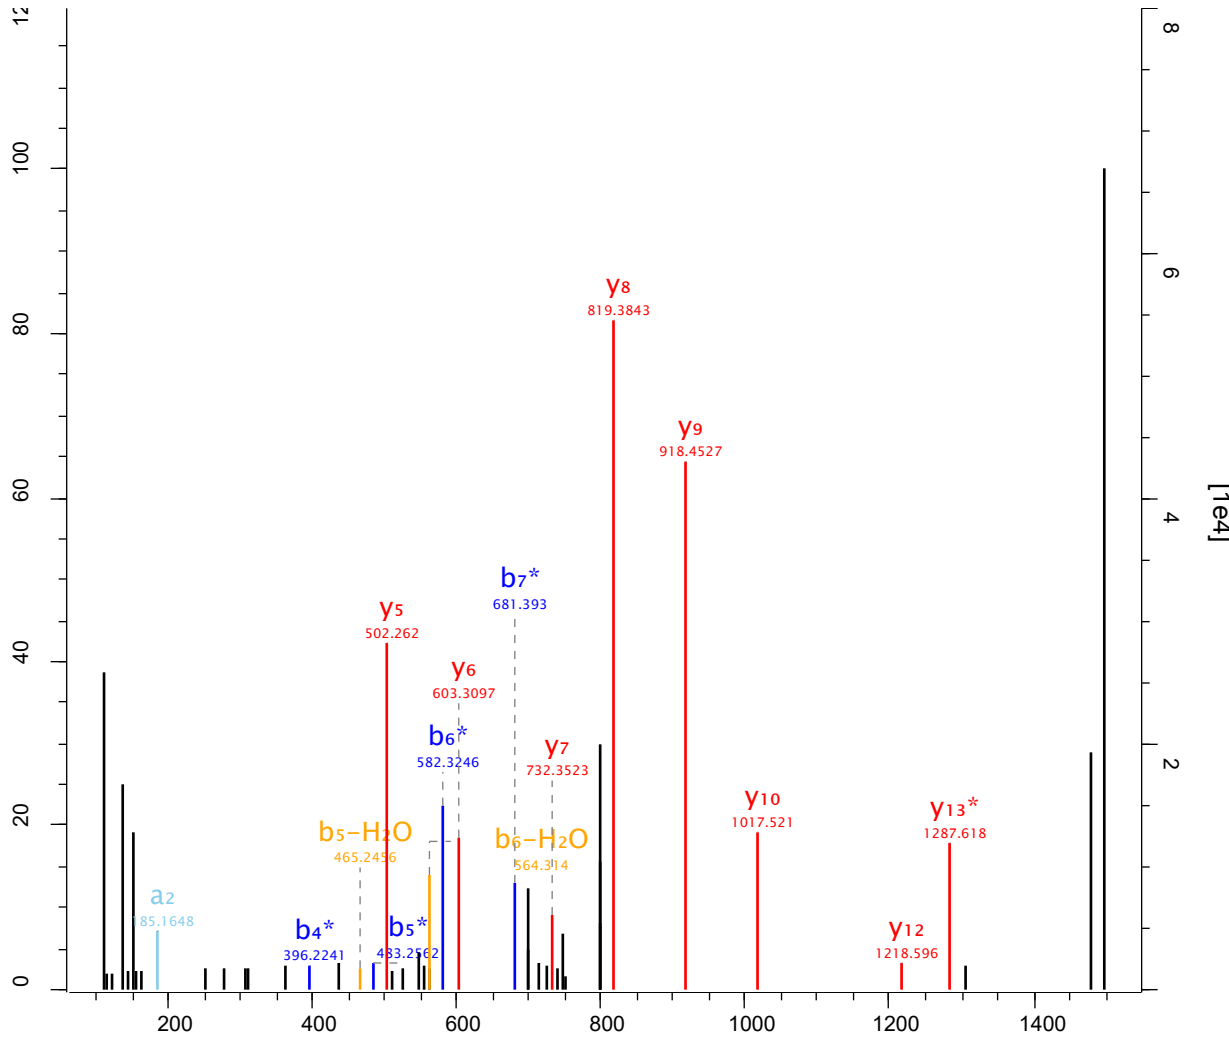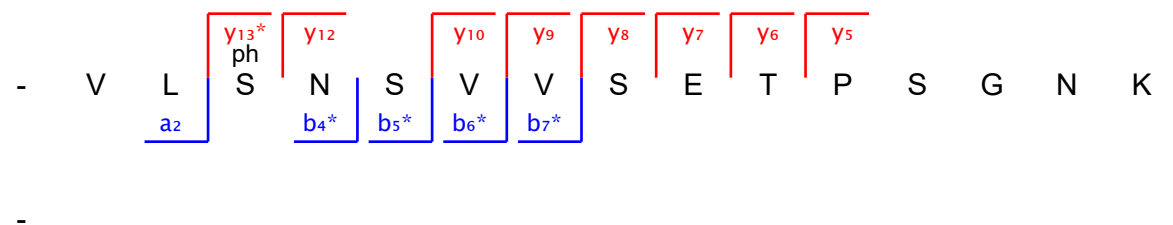

Raw file Scan Method Score m/z  
 sys\_02\_2 18166 FTMS; HCD 97.9 528.6

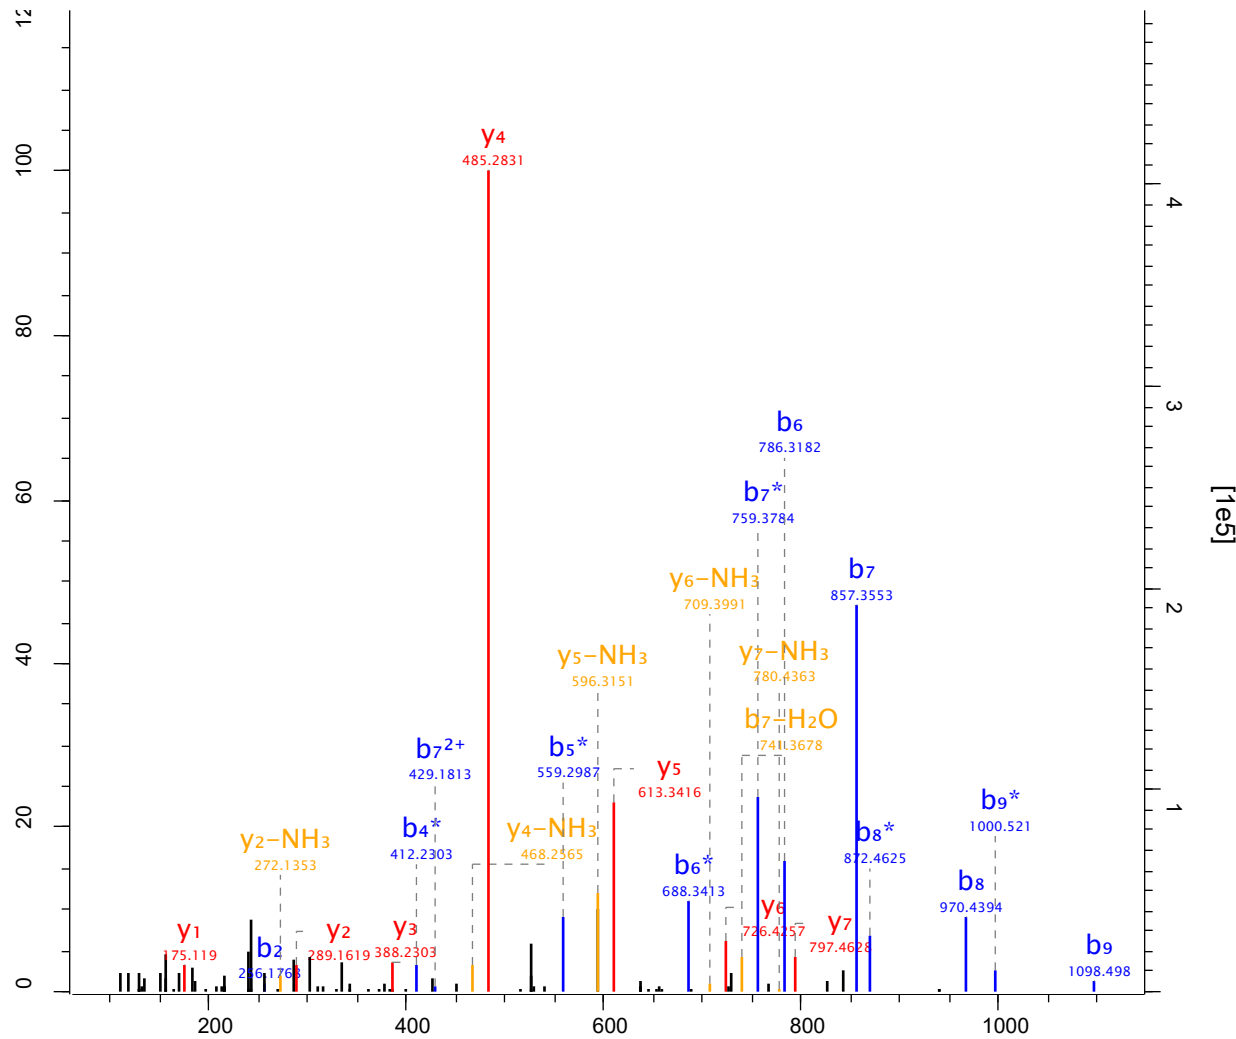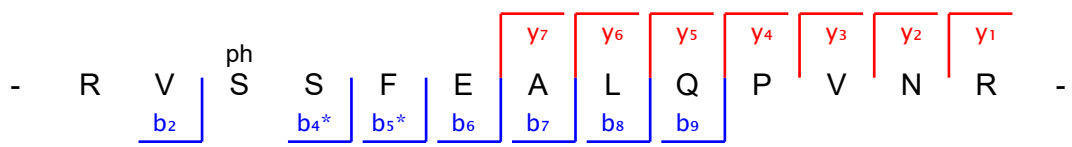

Raw file Scan Method Score m/z  
 sys\_02\_2 18195 FTMS; HCD 218.98 927.35

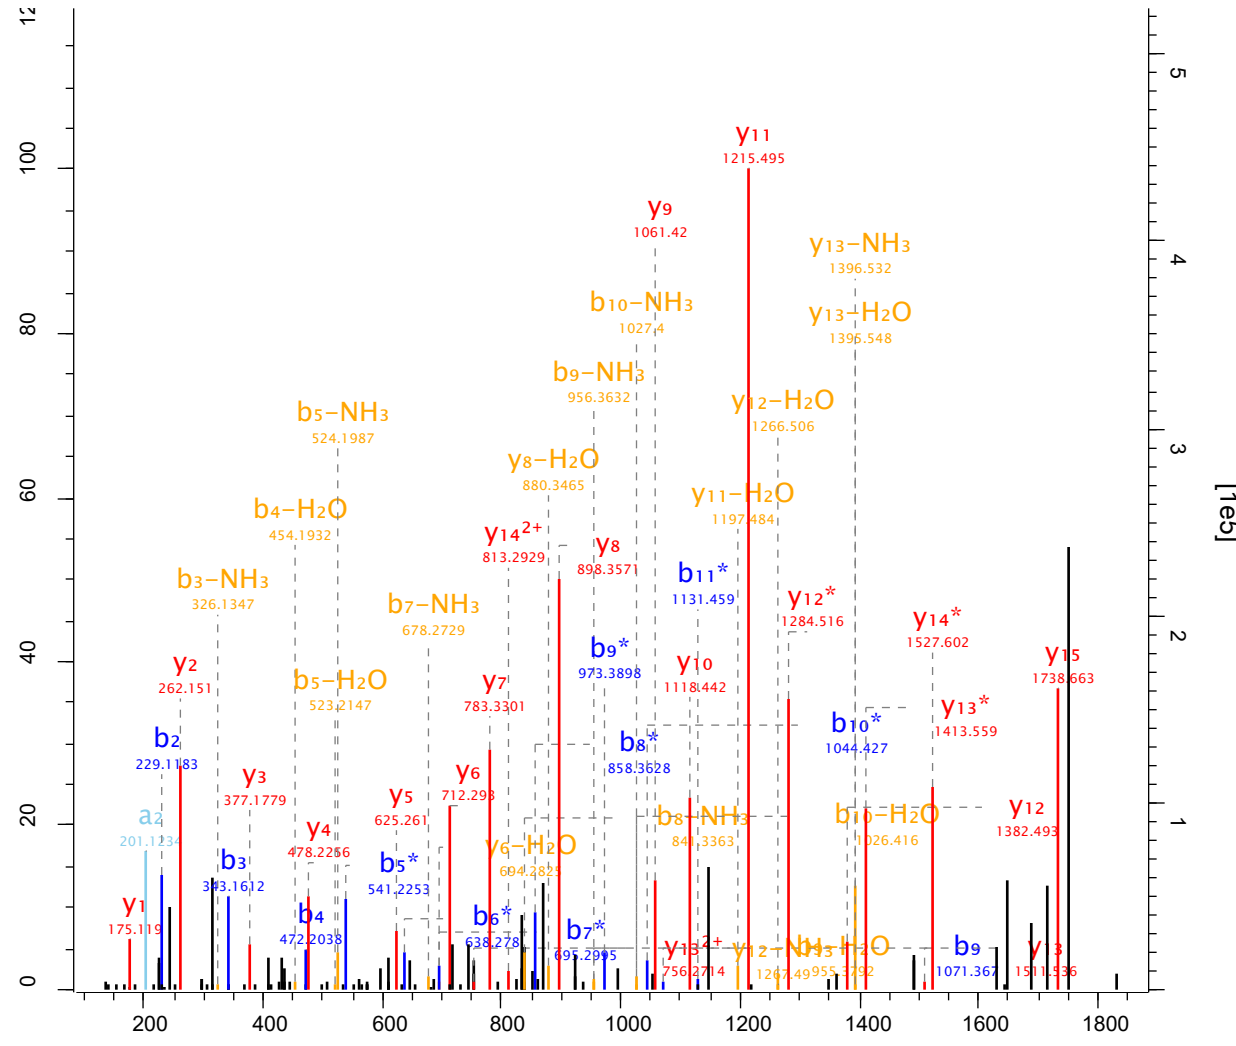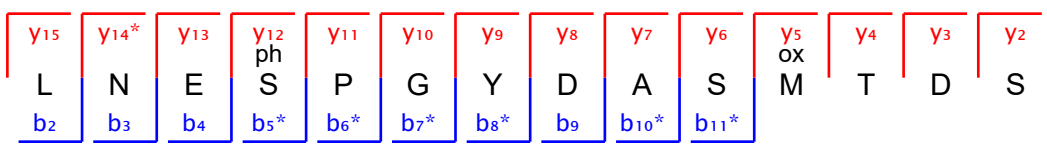

R -



Raw file Scan Method Score m/z  
 sys\_02\_2 18424 FTMS; HCD 124.08 585.6

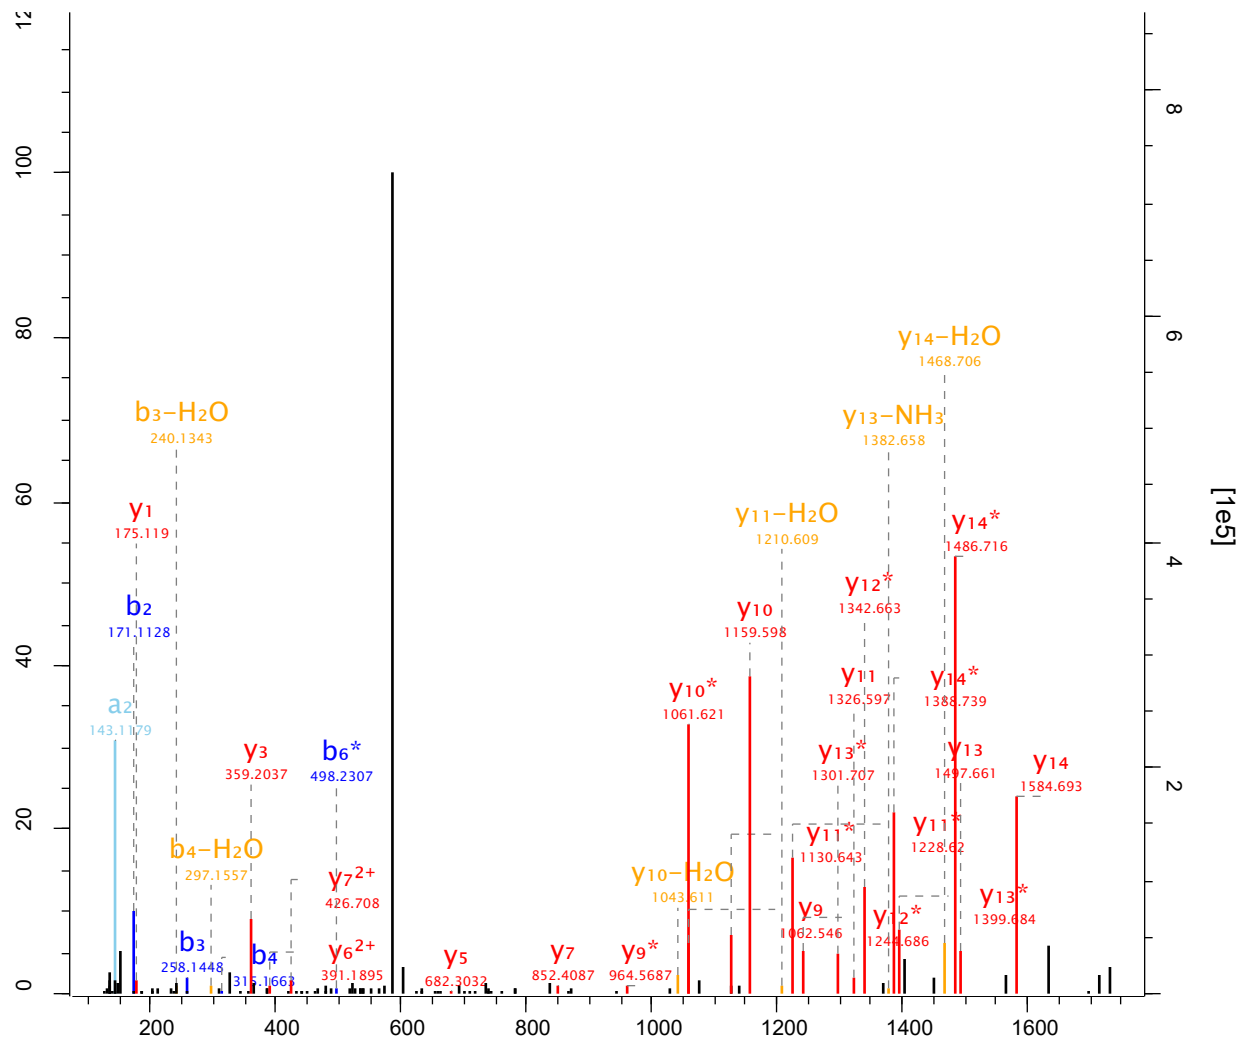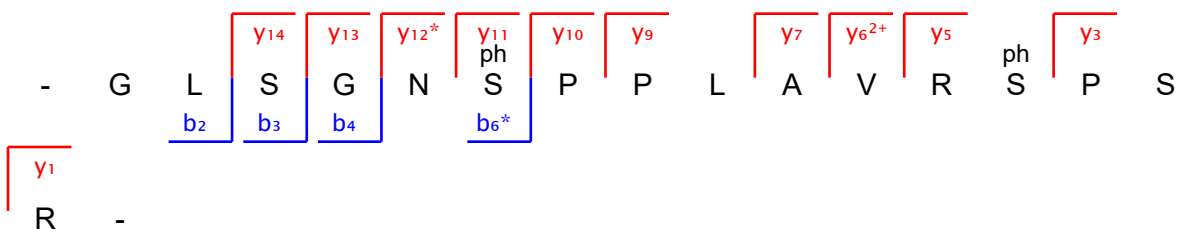

Raw file Scan Method Score m/z  
 sys\_02\_2 18544 FTMS; HCD 140.53 605.25

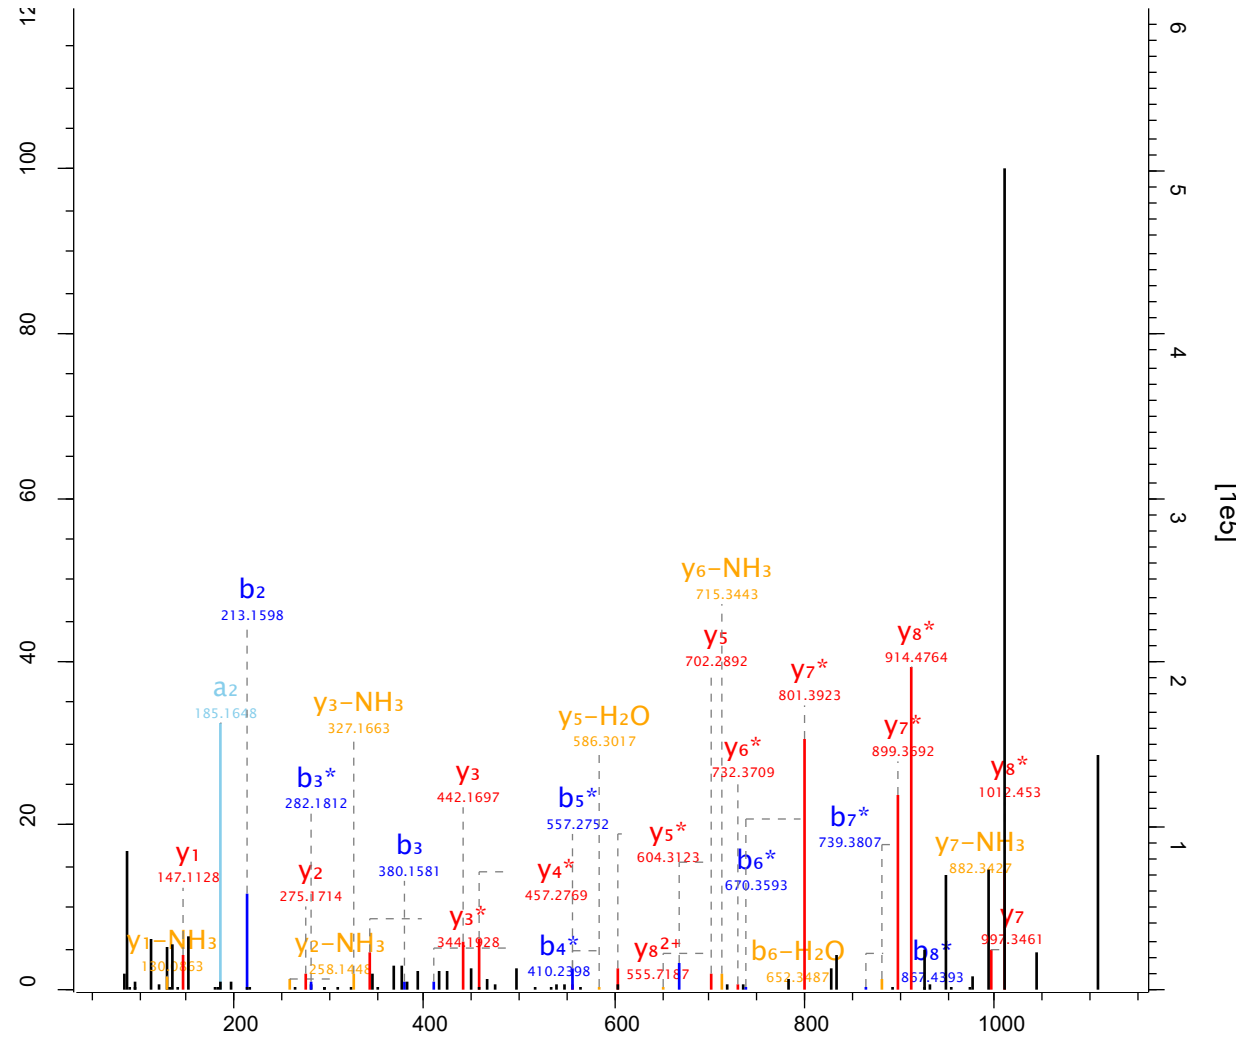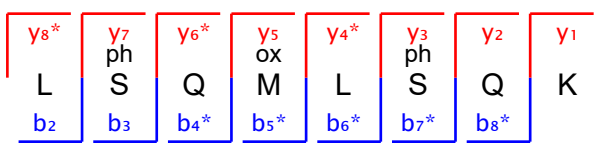

Raw file Scan Method Score m/z  
 sys\_02\_2 18579 FTMS; HCD 56.29 593.75

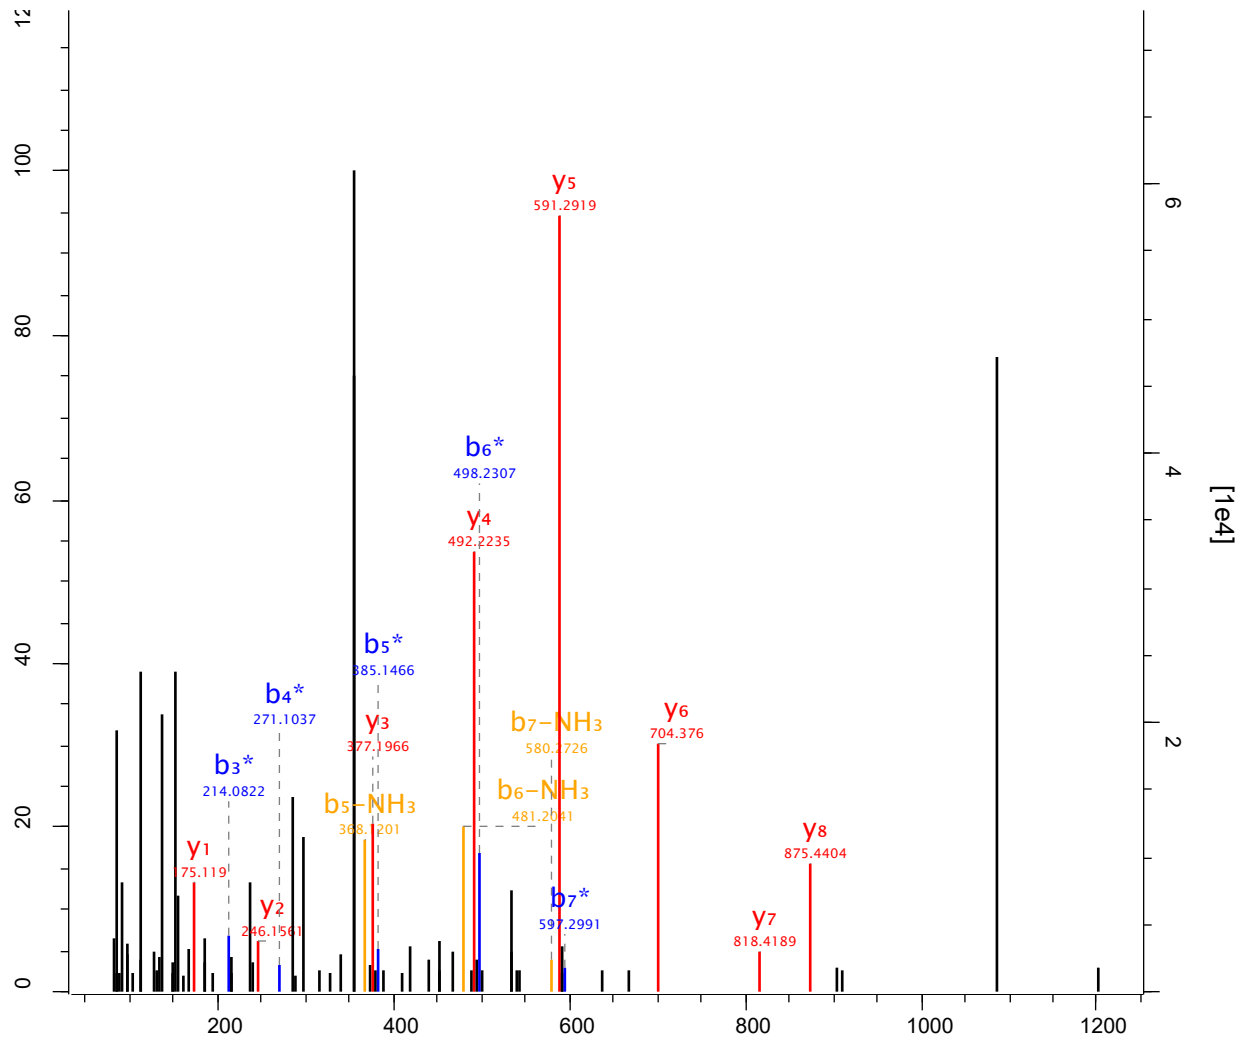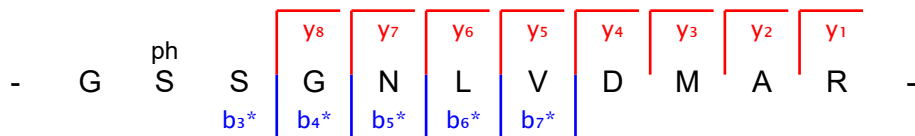

Raw file Scan Method Score m/z  
 sys\_02\_2 18807 FTMS; HCD 128.54 567.76

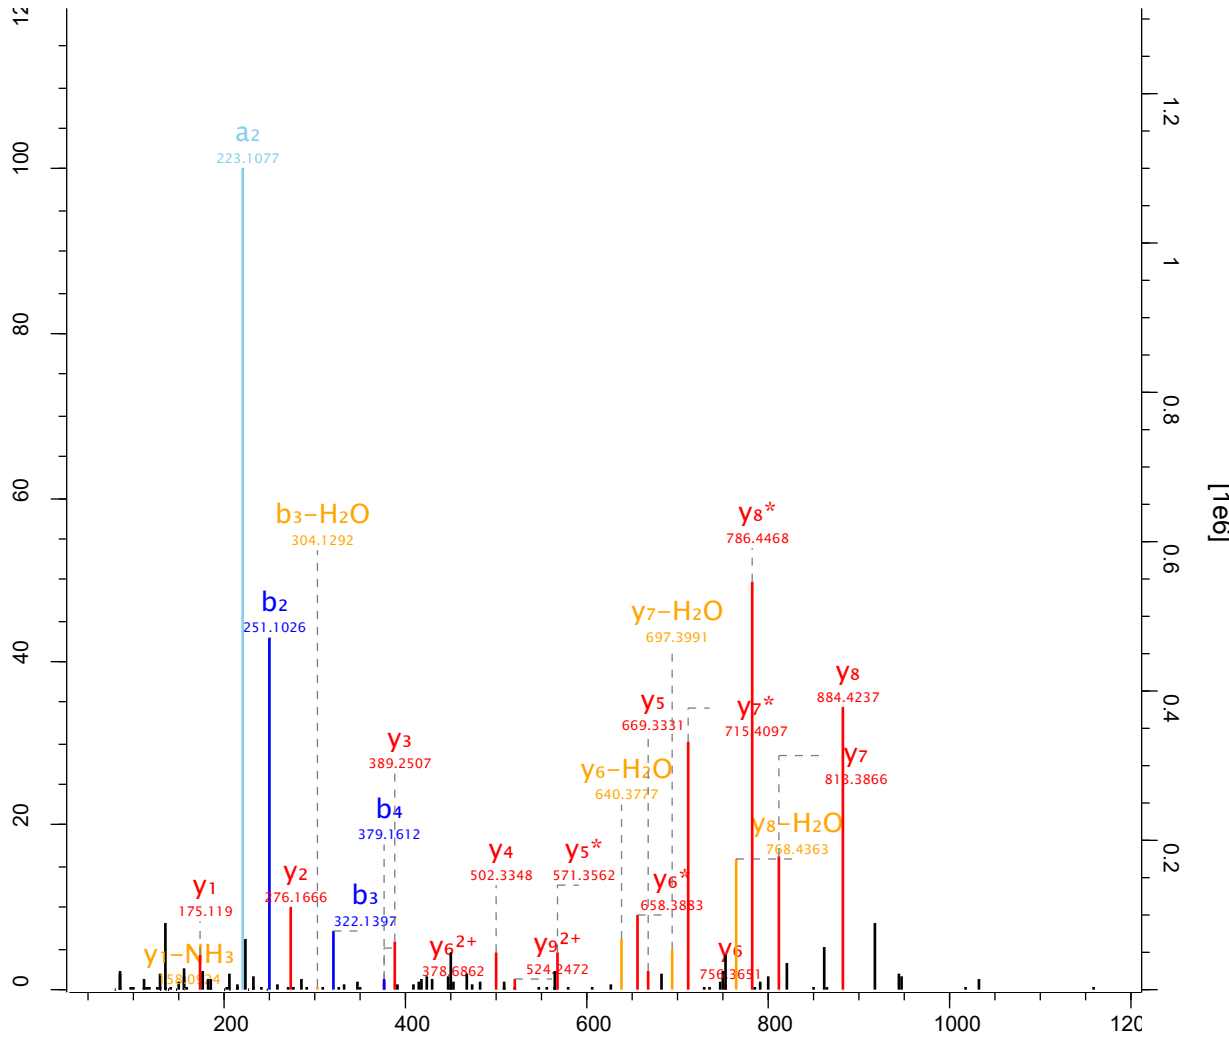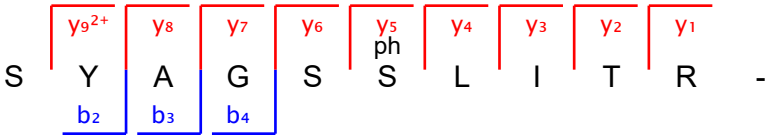



| Raw file | Scan | Method    | Score | m/z    |
|----------|------|-----------|-------|--------|
| sys_02_2 | 1884 | FTMS; HCD | 42.96 | 615.27 |

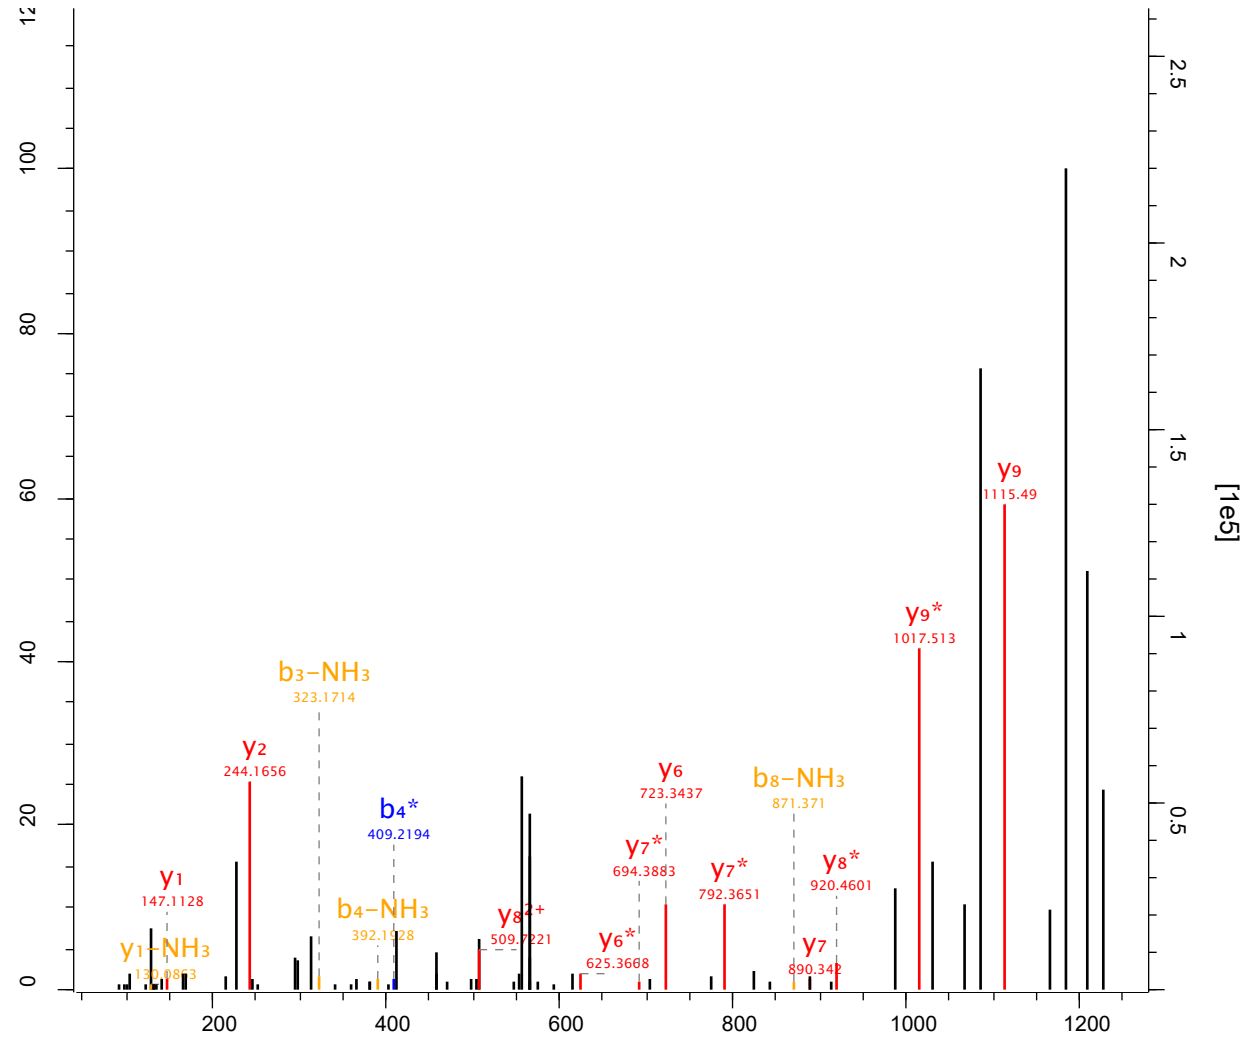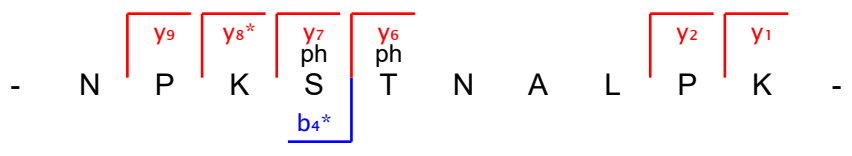

Raw file Scan Method Score m/z  
 sys\_02\_2 1898 FTMS; HCD 125.47 427.53

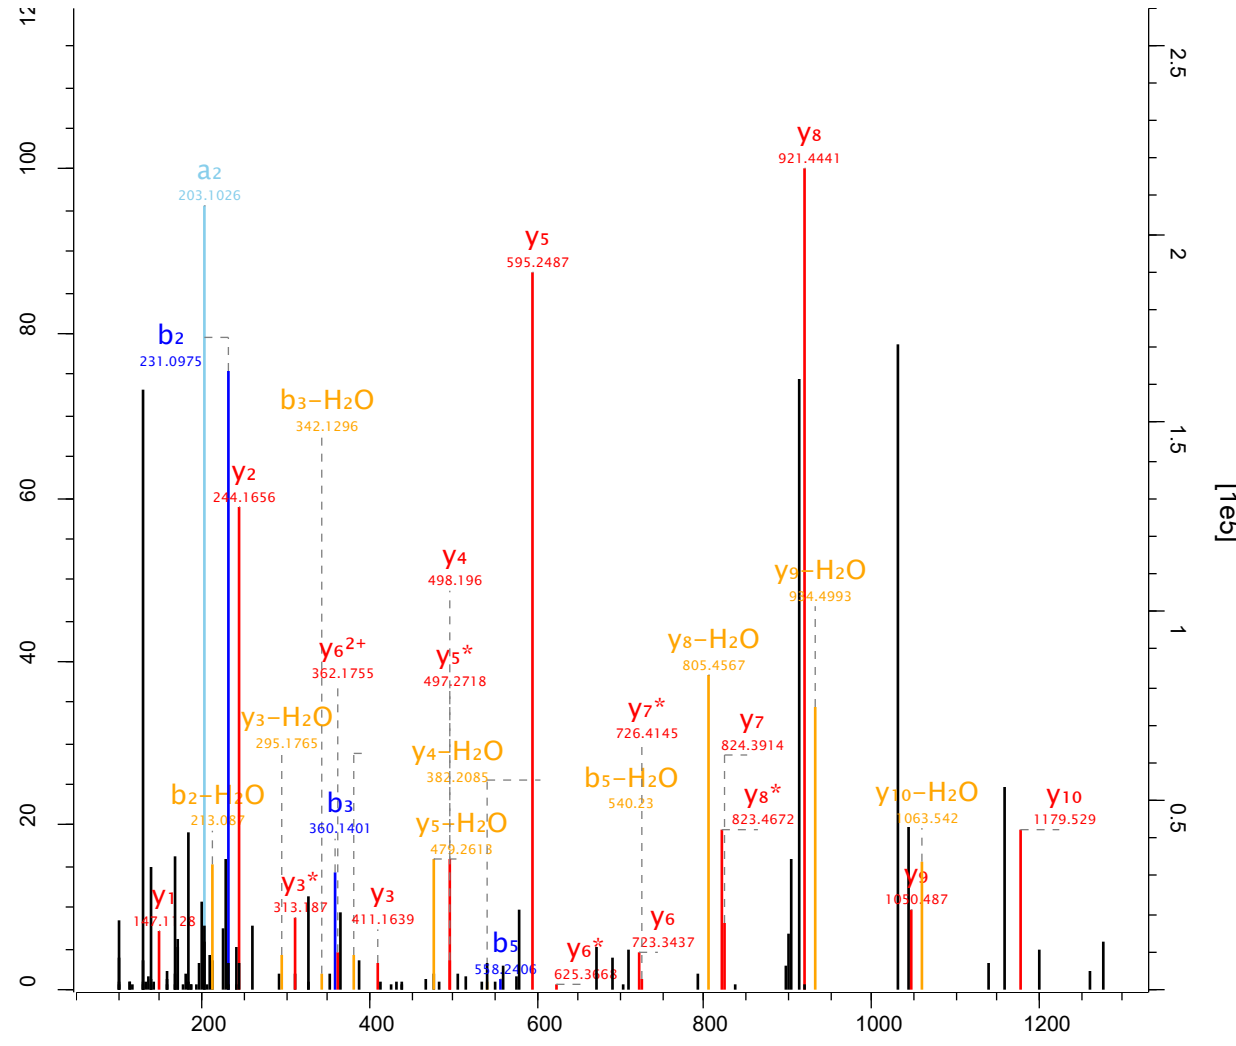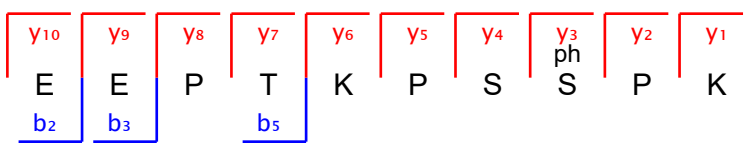

Raw file Scan Method Score m/z  
 sys\_02\_2 19480 FTMS; HCD 155.8 574.77

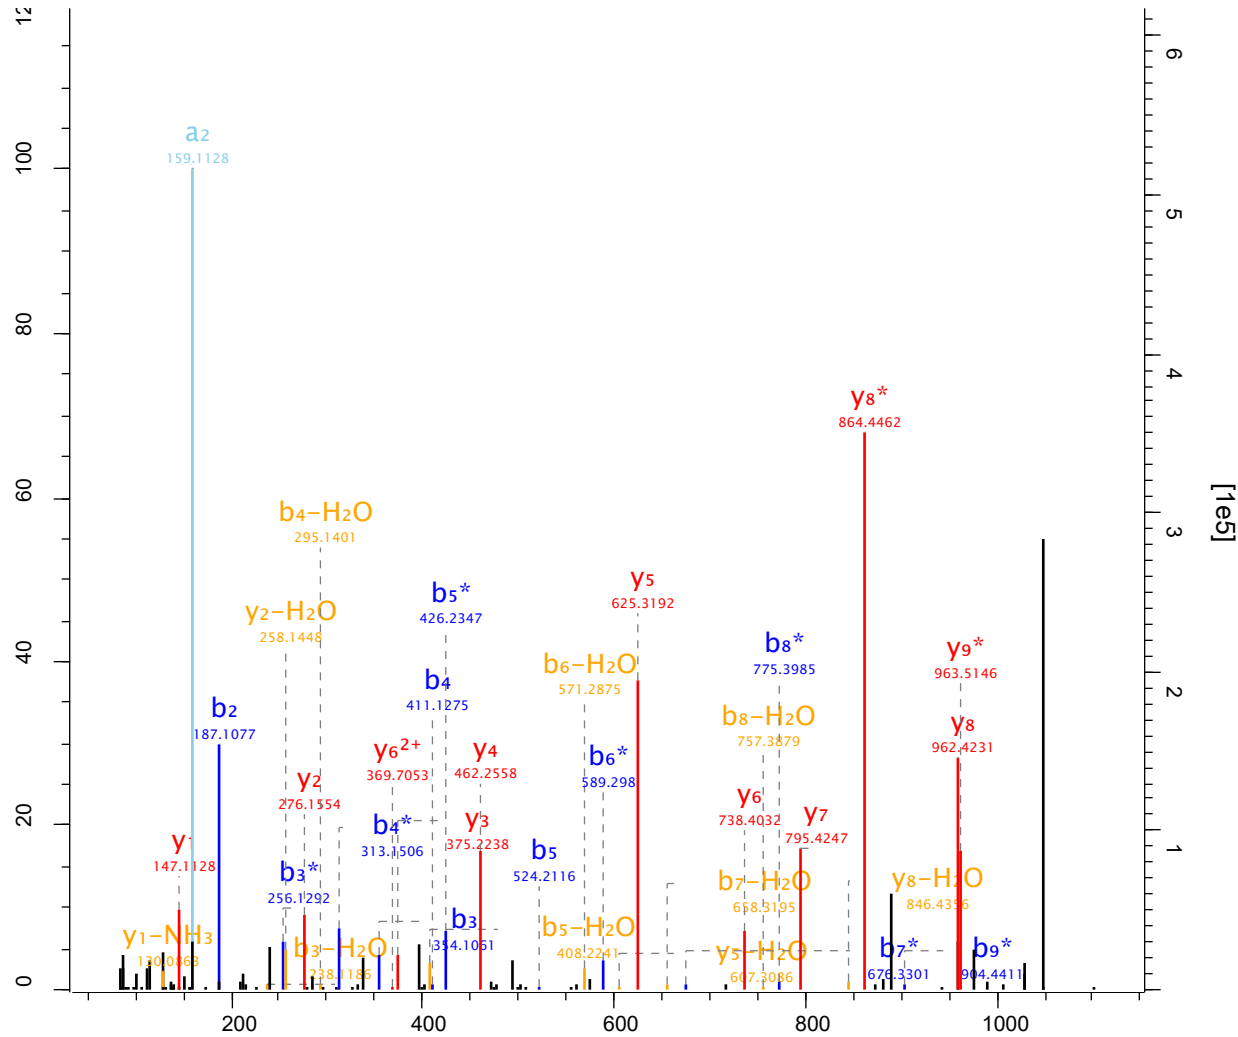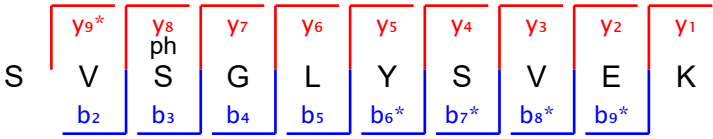

| Raw file | Scan  | Method    | Score | m/z    |
|----------|-------|-----------|-------|--------|
| sys_02_2 | 19756 | FTMS; HCD | 47.51 | 698.79 |

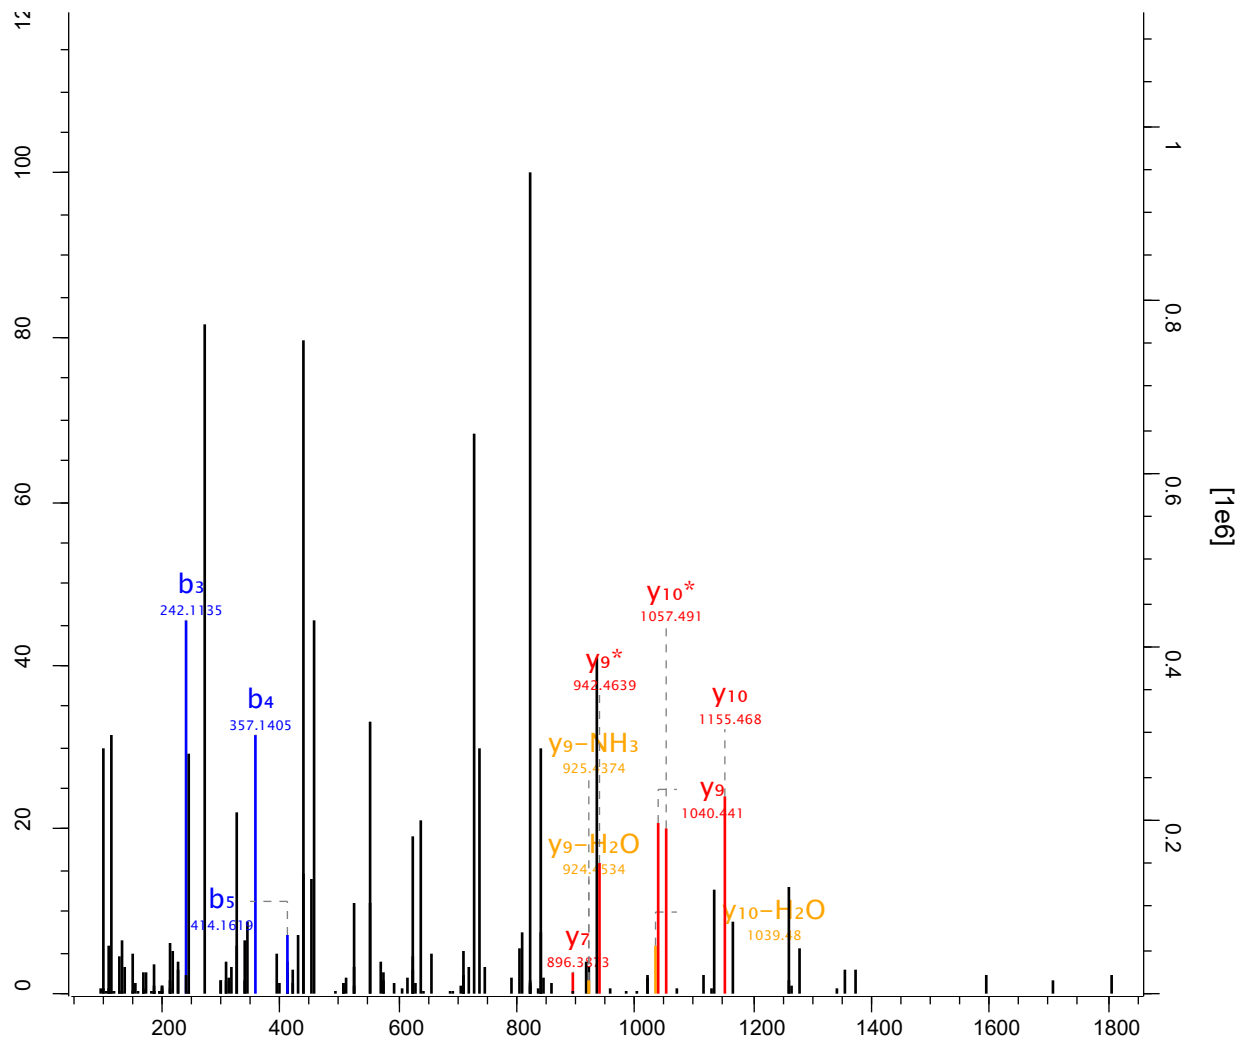

- G S P D G S P S D V D R K -

b<sub>3</sub>
b<sub>4</sub>
b<sub>5</sub>
y<sub>10</sub>
y<sub>9</sub>
y<sub>7</sub>

Raw file Scan Method Score m/z  
 sys\_02\_2 19846 FTMS; HCD 62.34 534.75

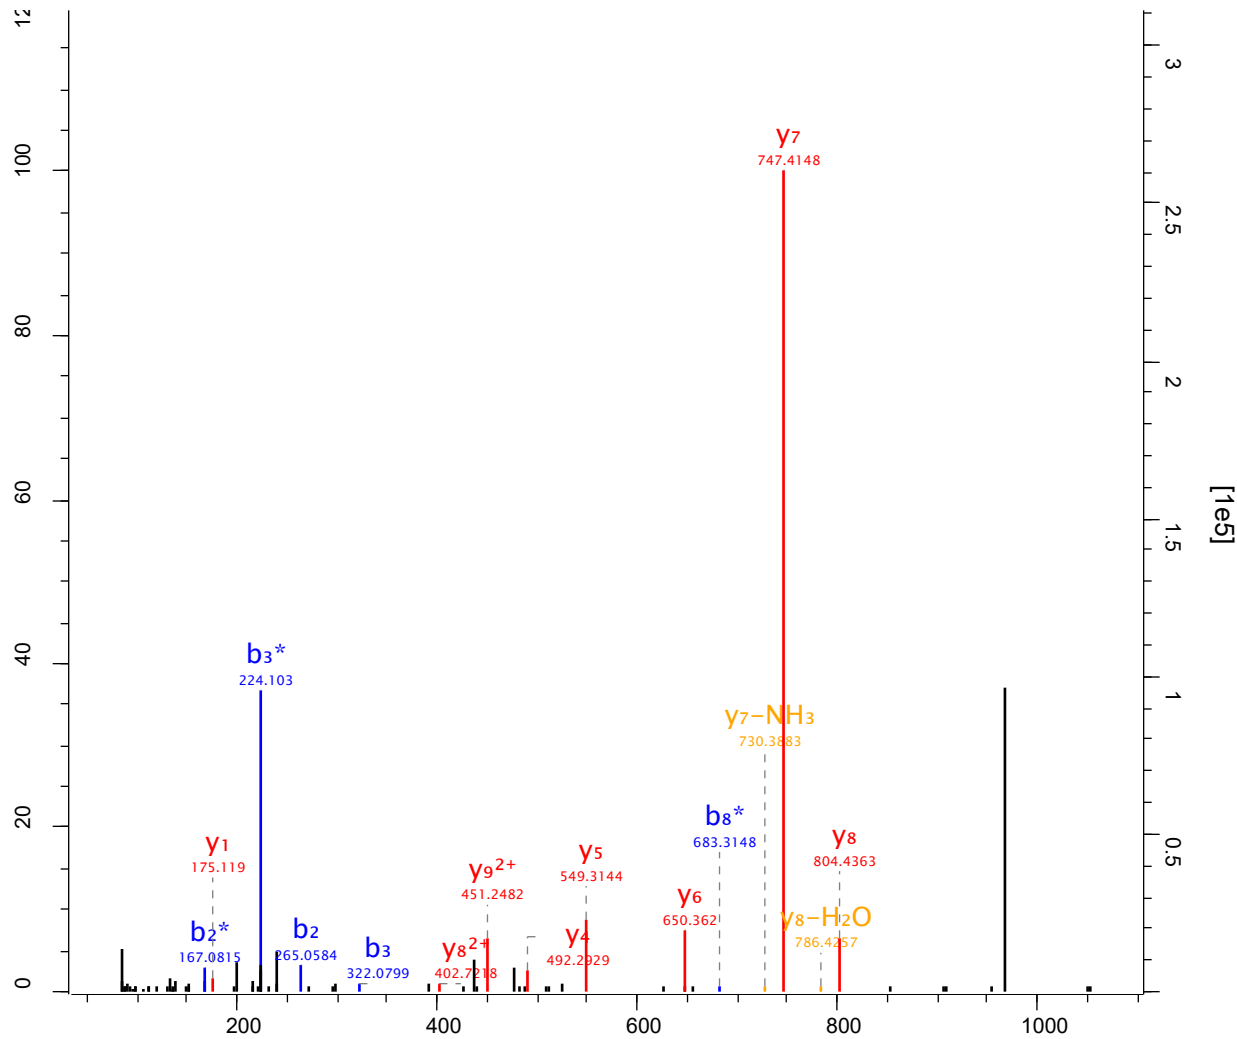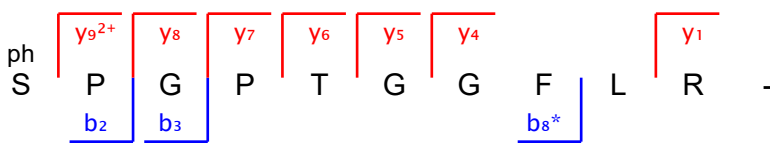

Raw file Scan Method Score m/z  
 sys\_02\_2 20188 FTMS; HCD 72.72 946.42

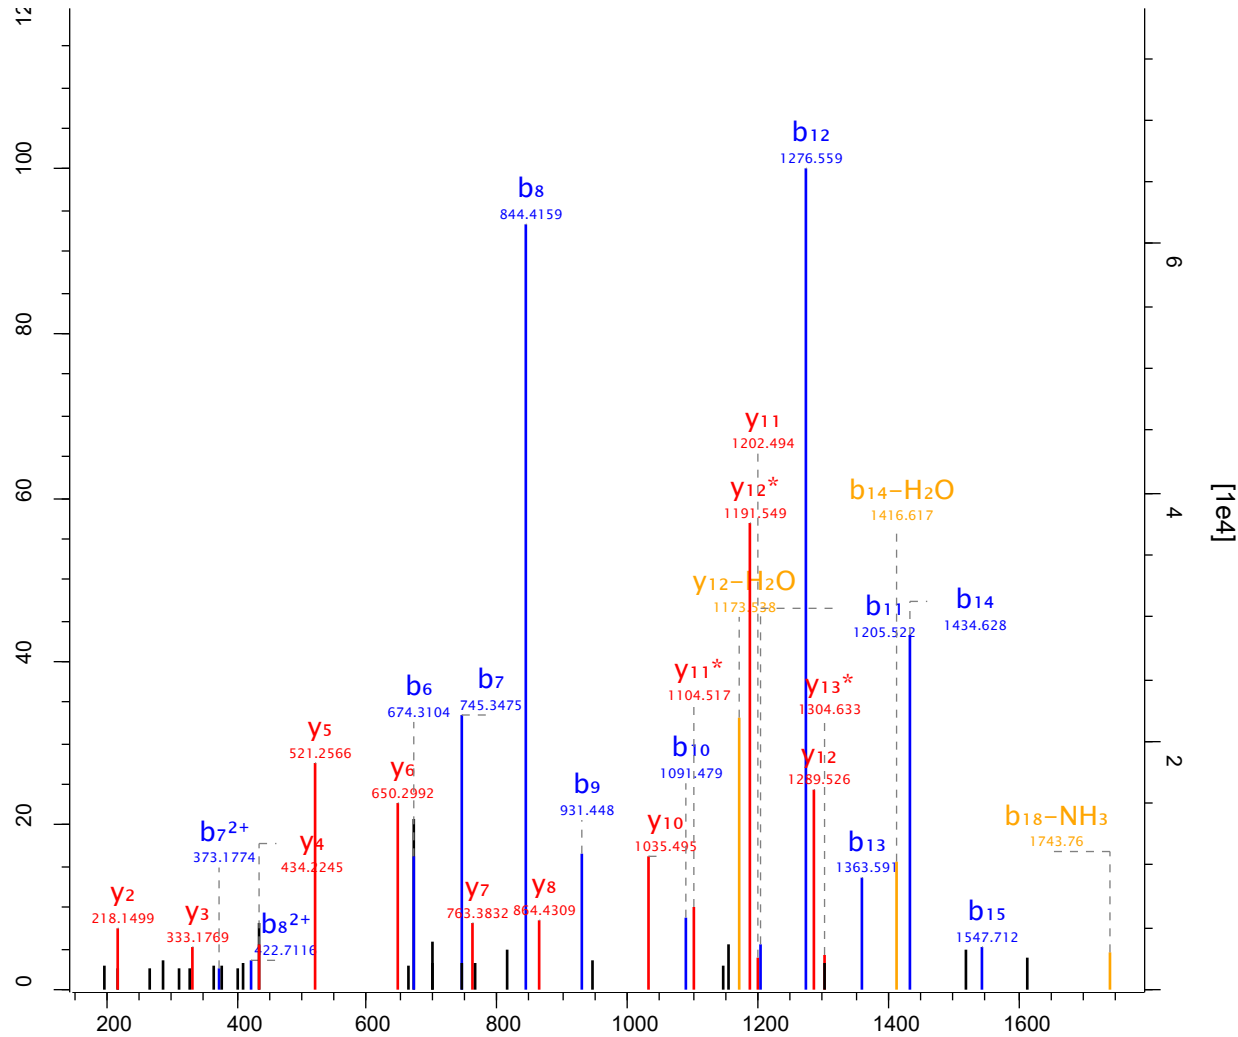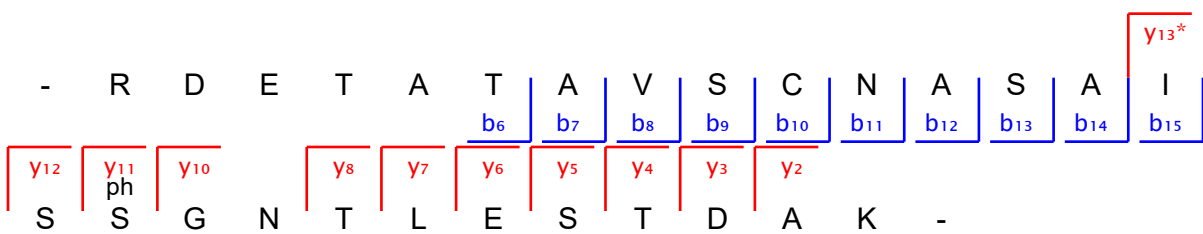

Raw file Scan Method Score m/z  
 sys\_02\_2 20583 FTMS; HCD 141.31 862.86

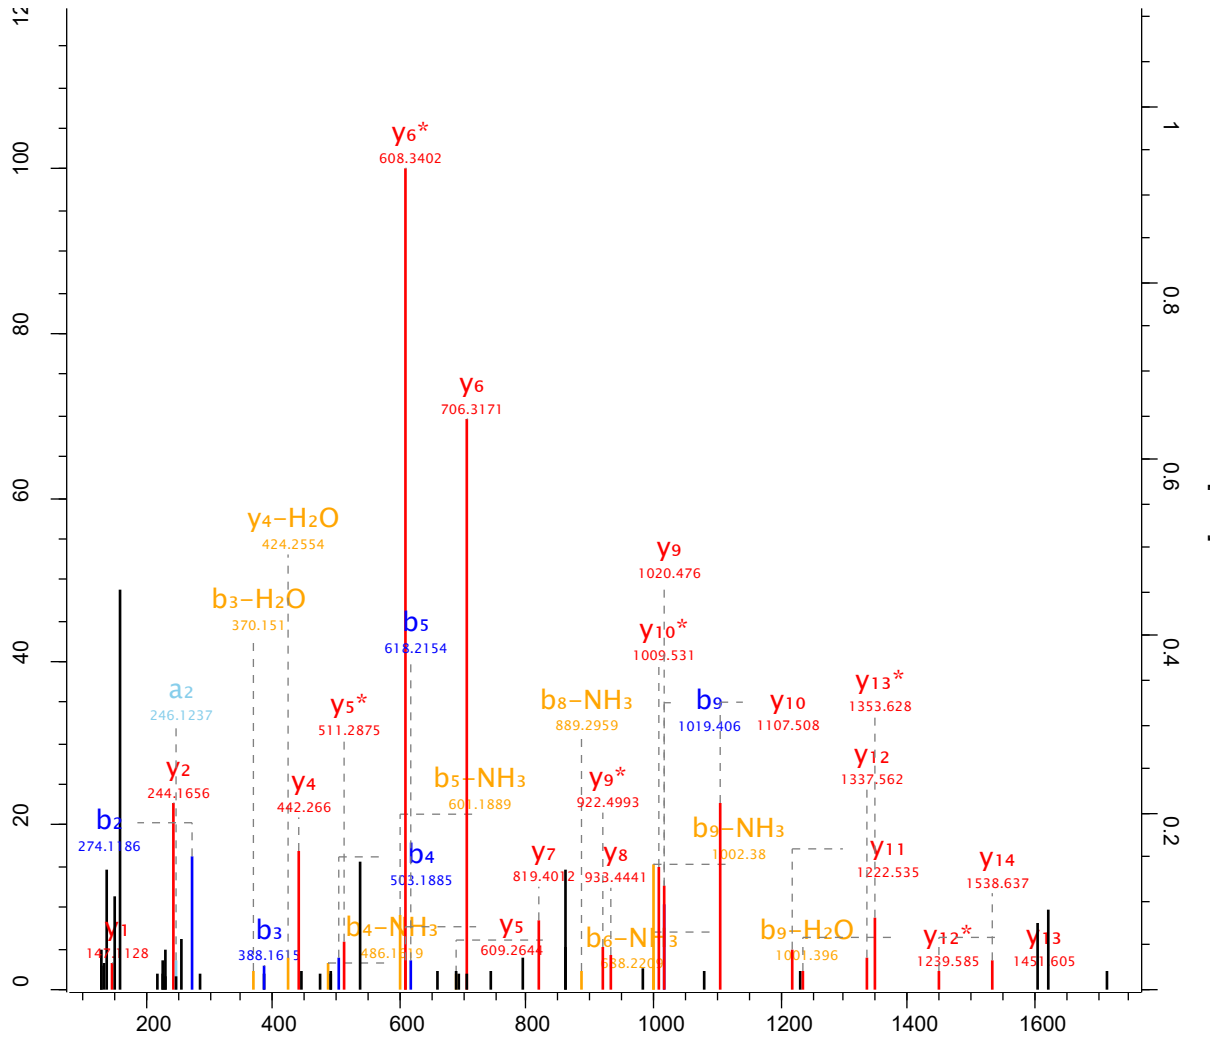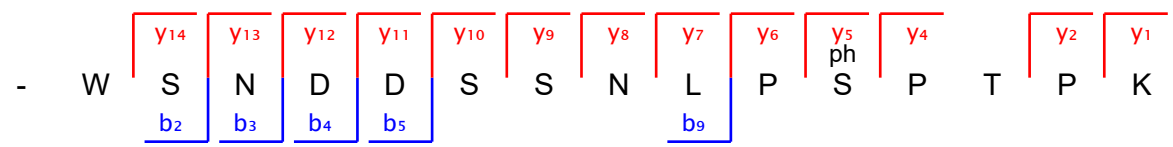

| Raw file | Scan | Method    | Score | m/z    |
|----------|------|-----------|-------|--------|
| sys_02_2 | 2095 | FTMS; HCD | 45.28 | 597.78 |

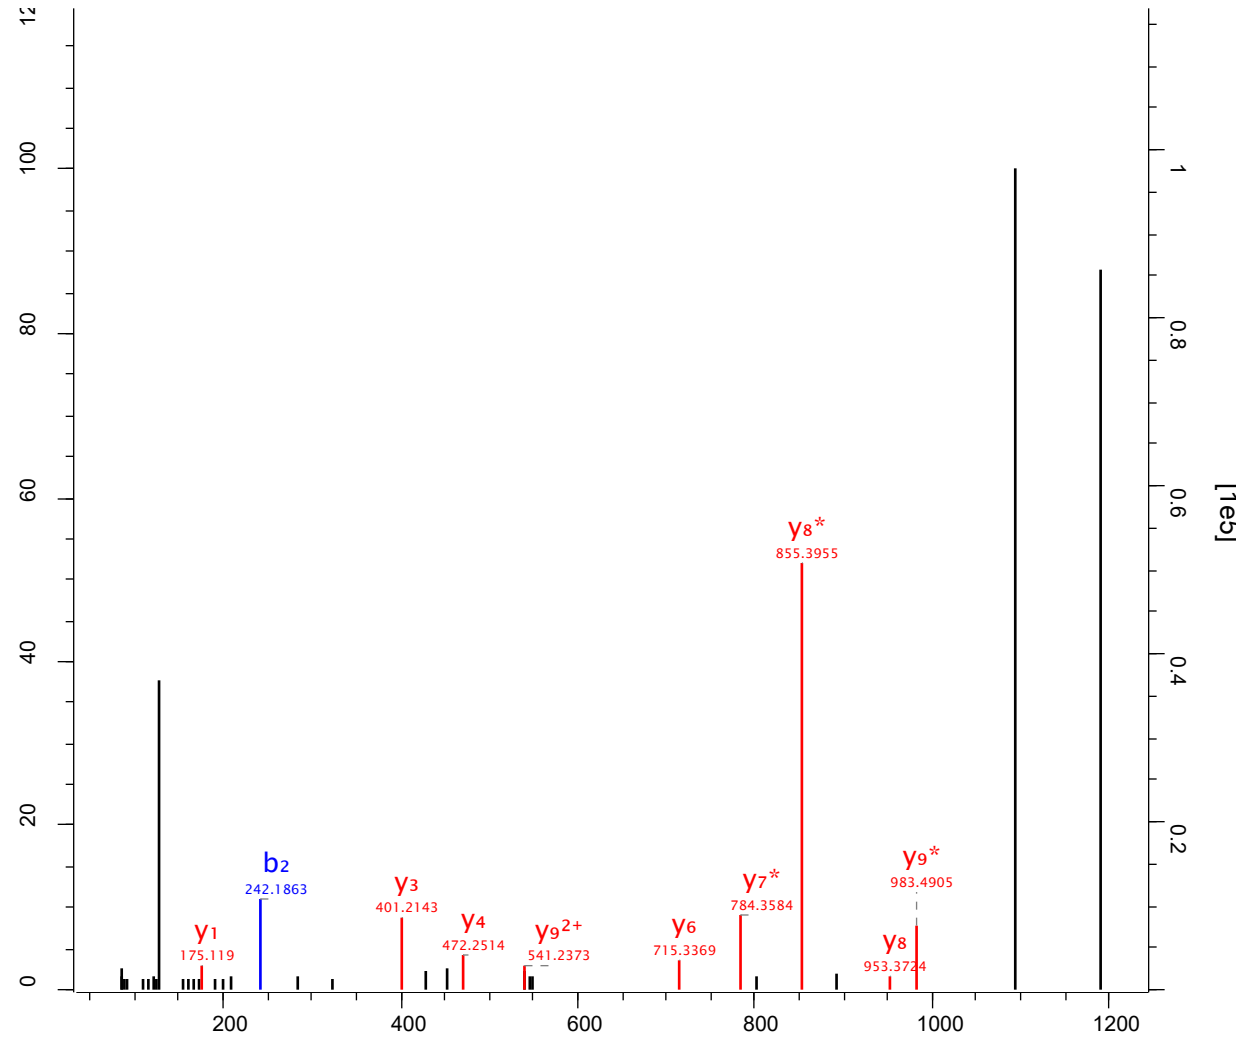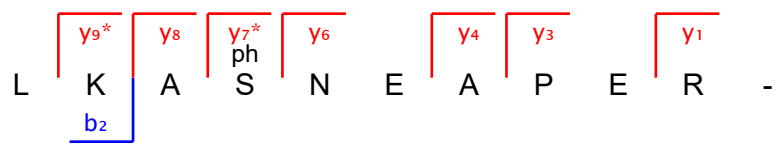



Raw file Scan Method Score m/z  
 sys\_02\_2 21265 FTMS; HCD 44.93 637.62

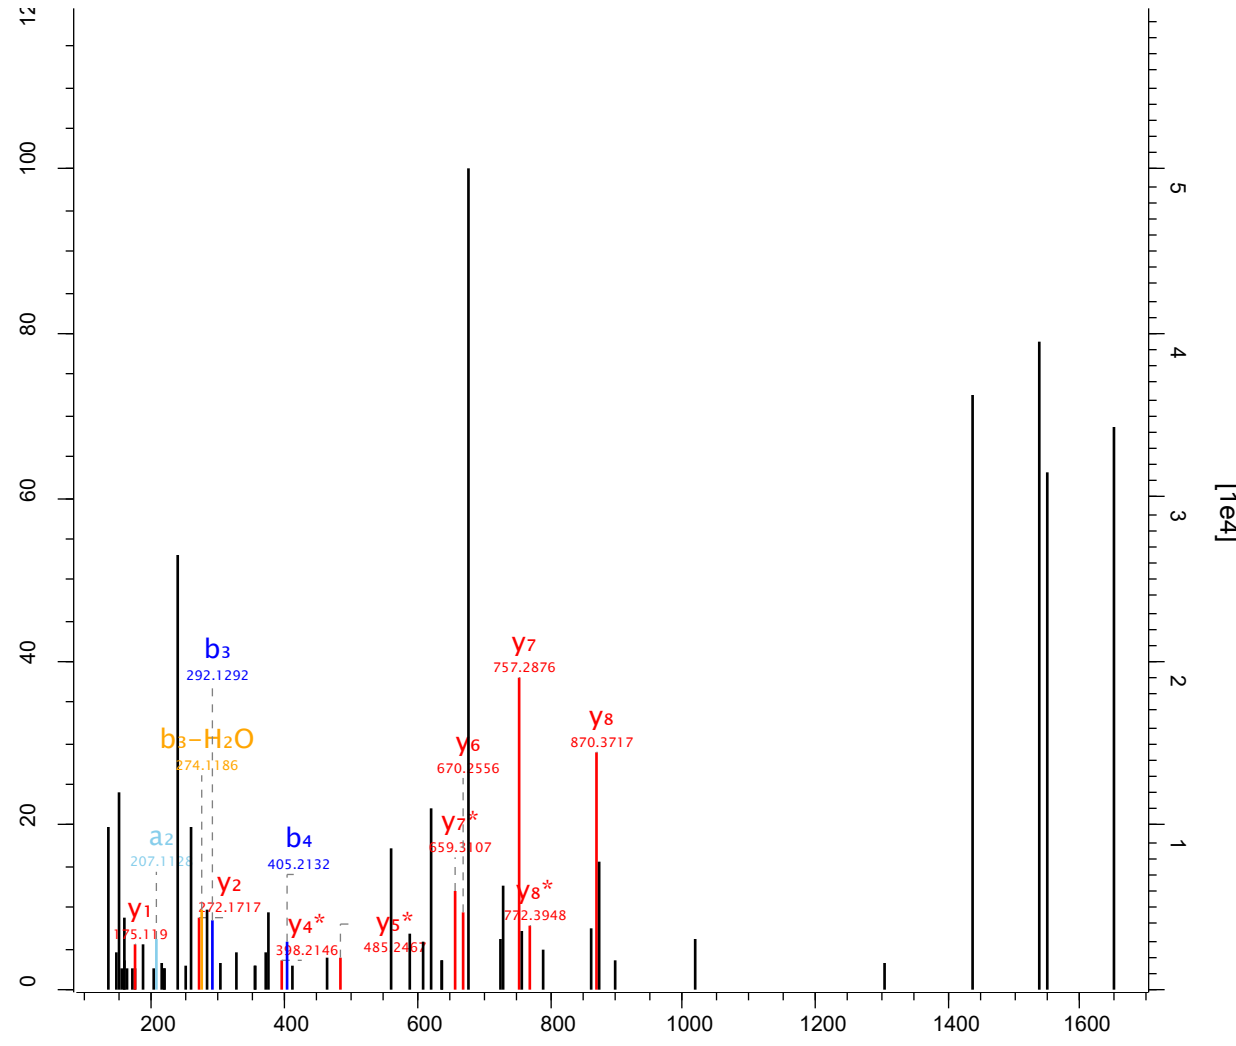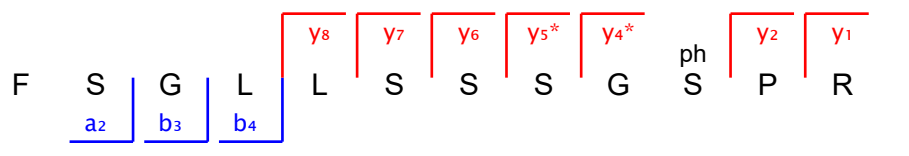

Raw file Scan Method Score m/z  
 sys\_02\_2 2137 FTMS; HCD 128.21 535.27

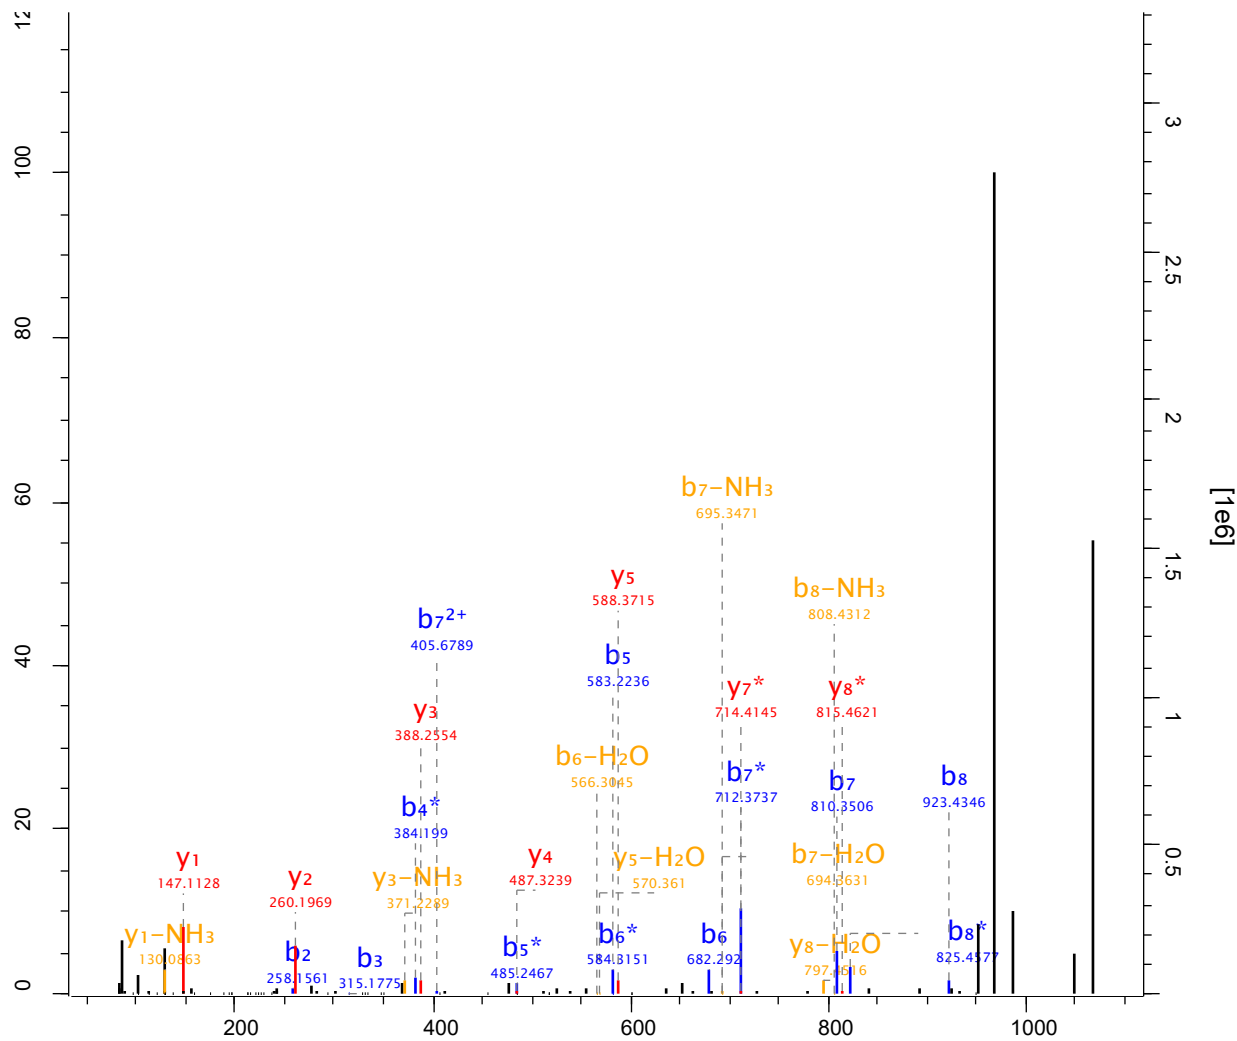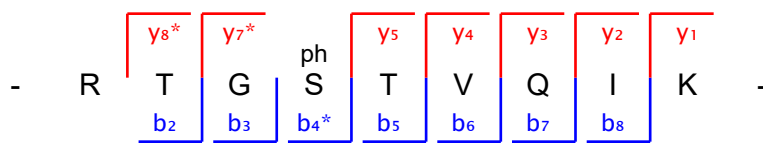

| Raw file | Scan | Method    | Score | m/z    |
|----------|------|-----------|-------|--------|
| sys_02_2 | 2159 | FTMS; HCD | 40.5  | 340.84 |

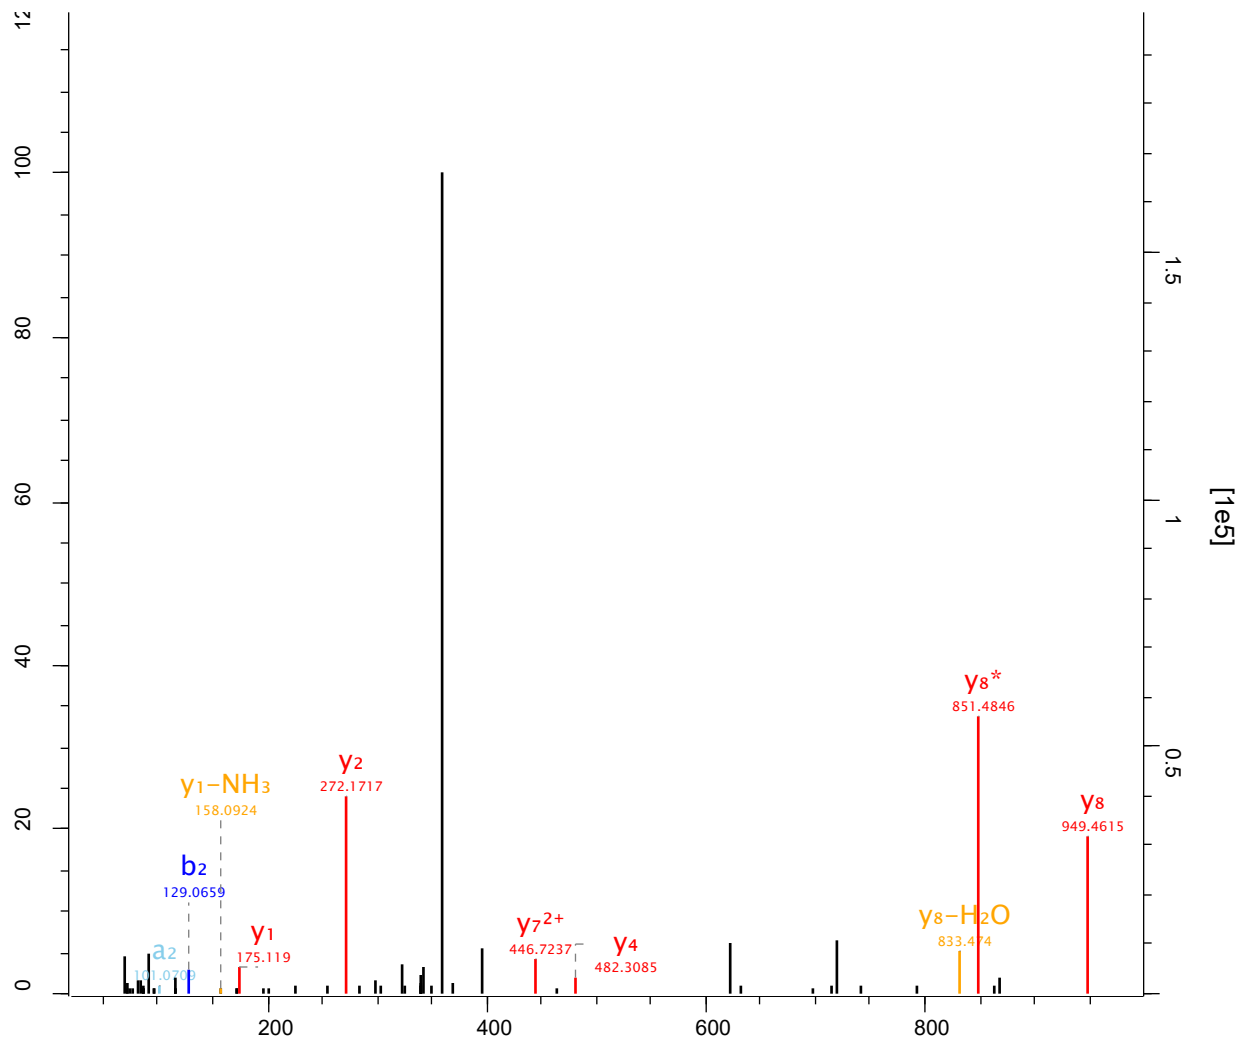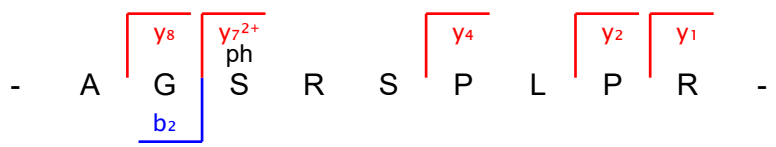

Raw file Scan Method Score m/z  
 sys\_02\_2 21604 FTMS; HCD 108.56 551.75

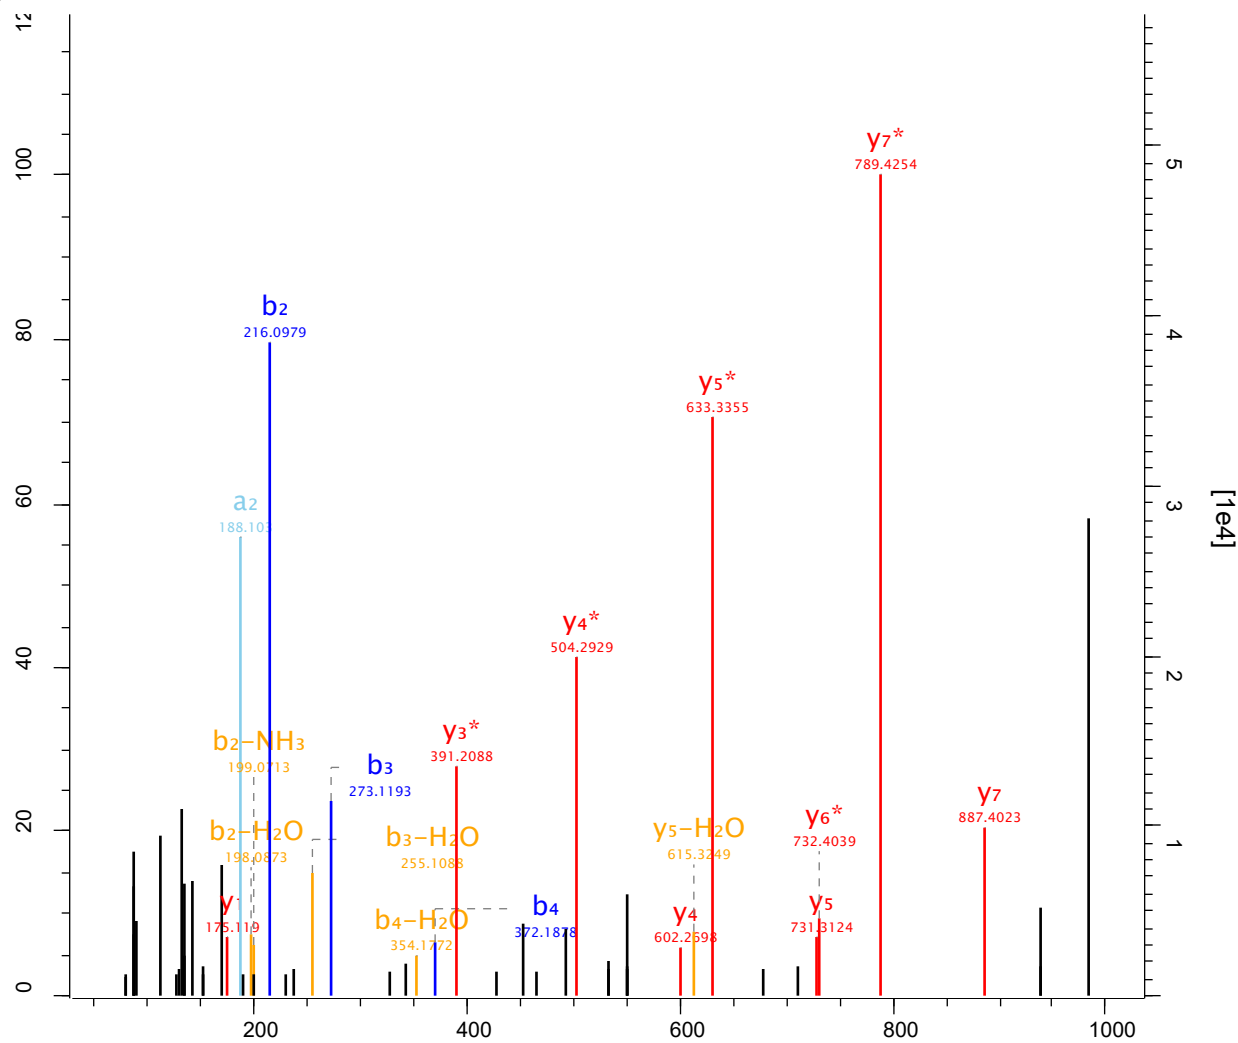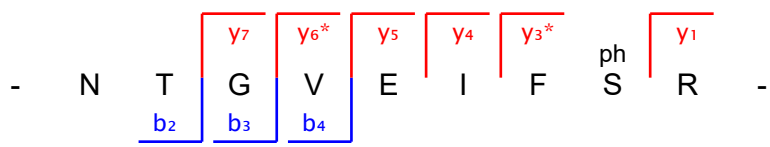

Raw file Scan Method Score m/z  
 sys\_02\_2 21758 FTMS; HCD 54.34 538.76

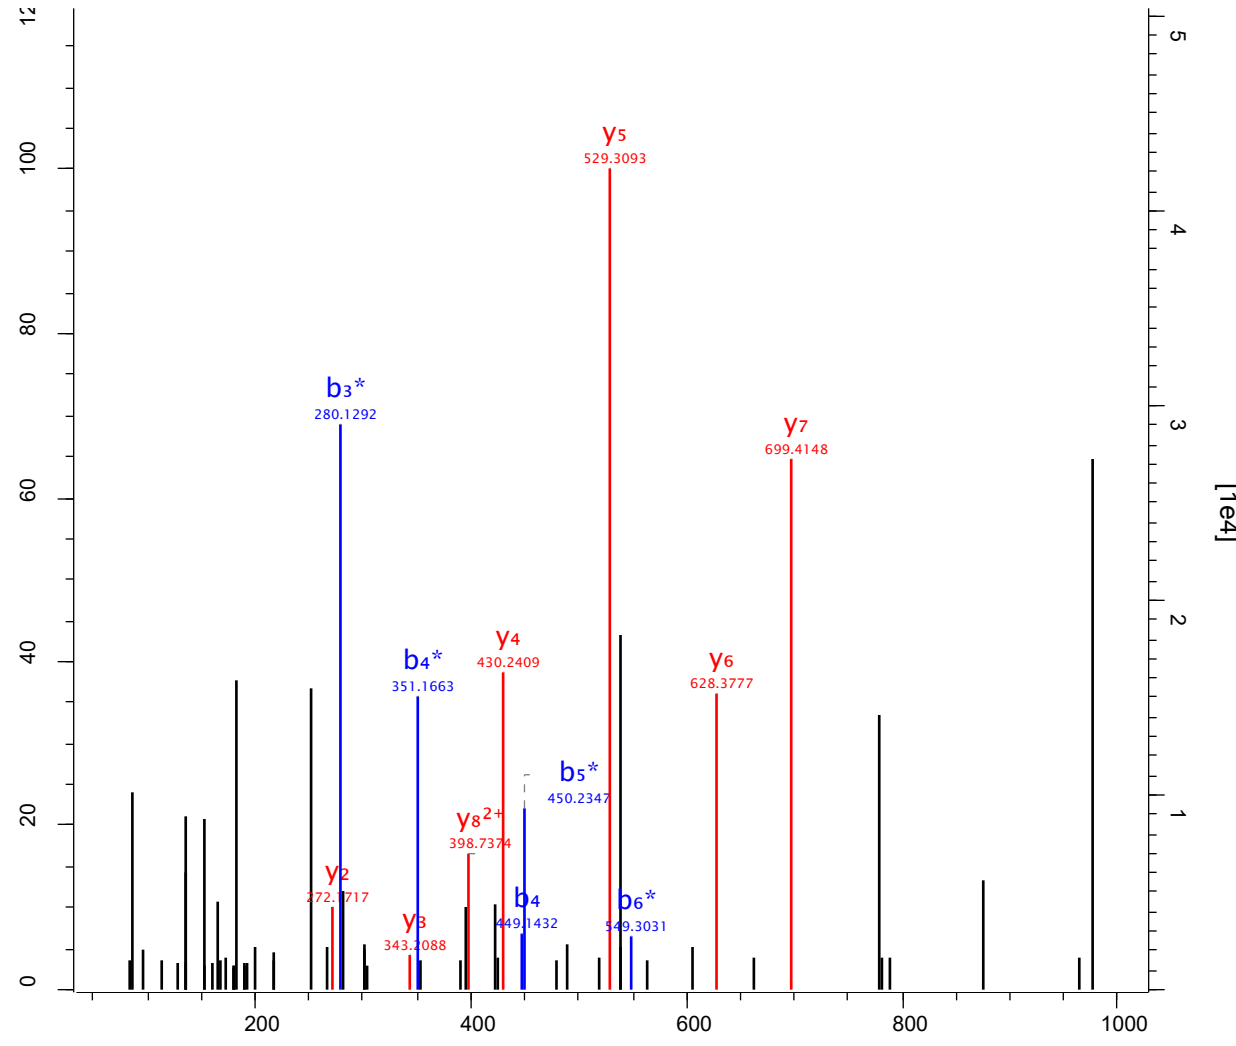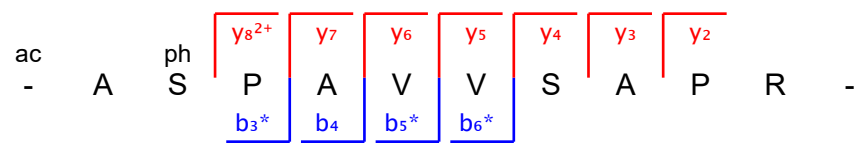

Raw file Scan Method Score m/z  
 sys\_02\_2 21784 FTMS; HCD 54.22 850.4

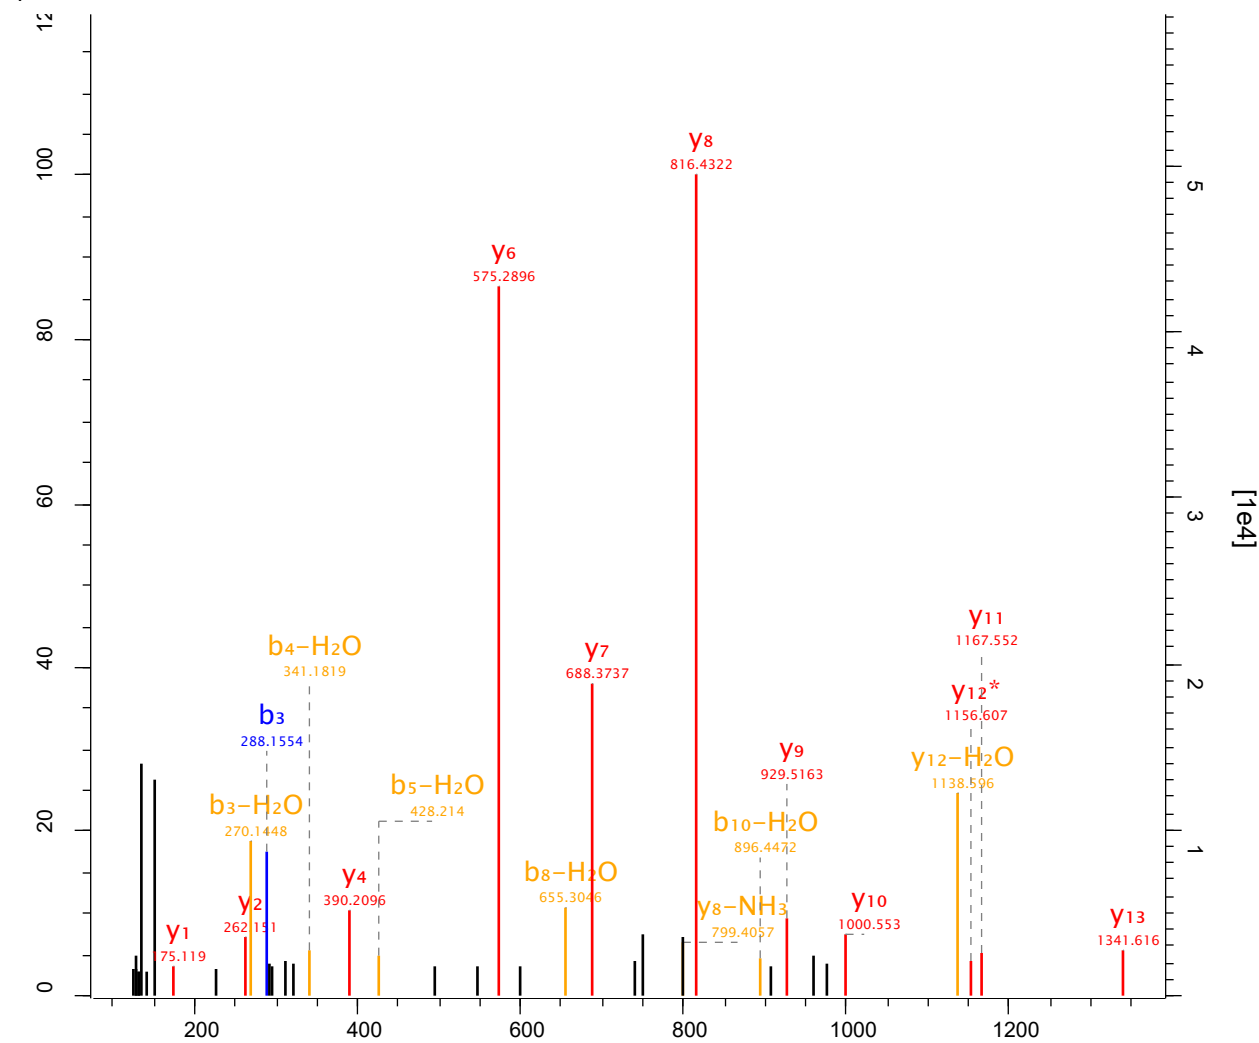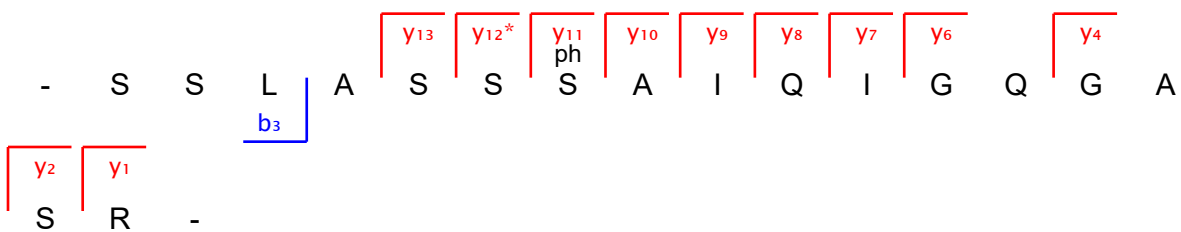

Raw file Scan Method Score m/z  
 sys\_02\_2 21948 FTMS; HCD 82.88 587.63

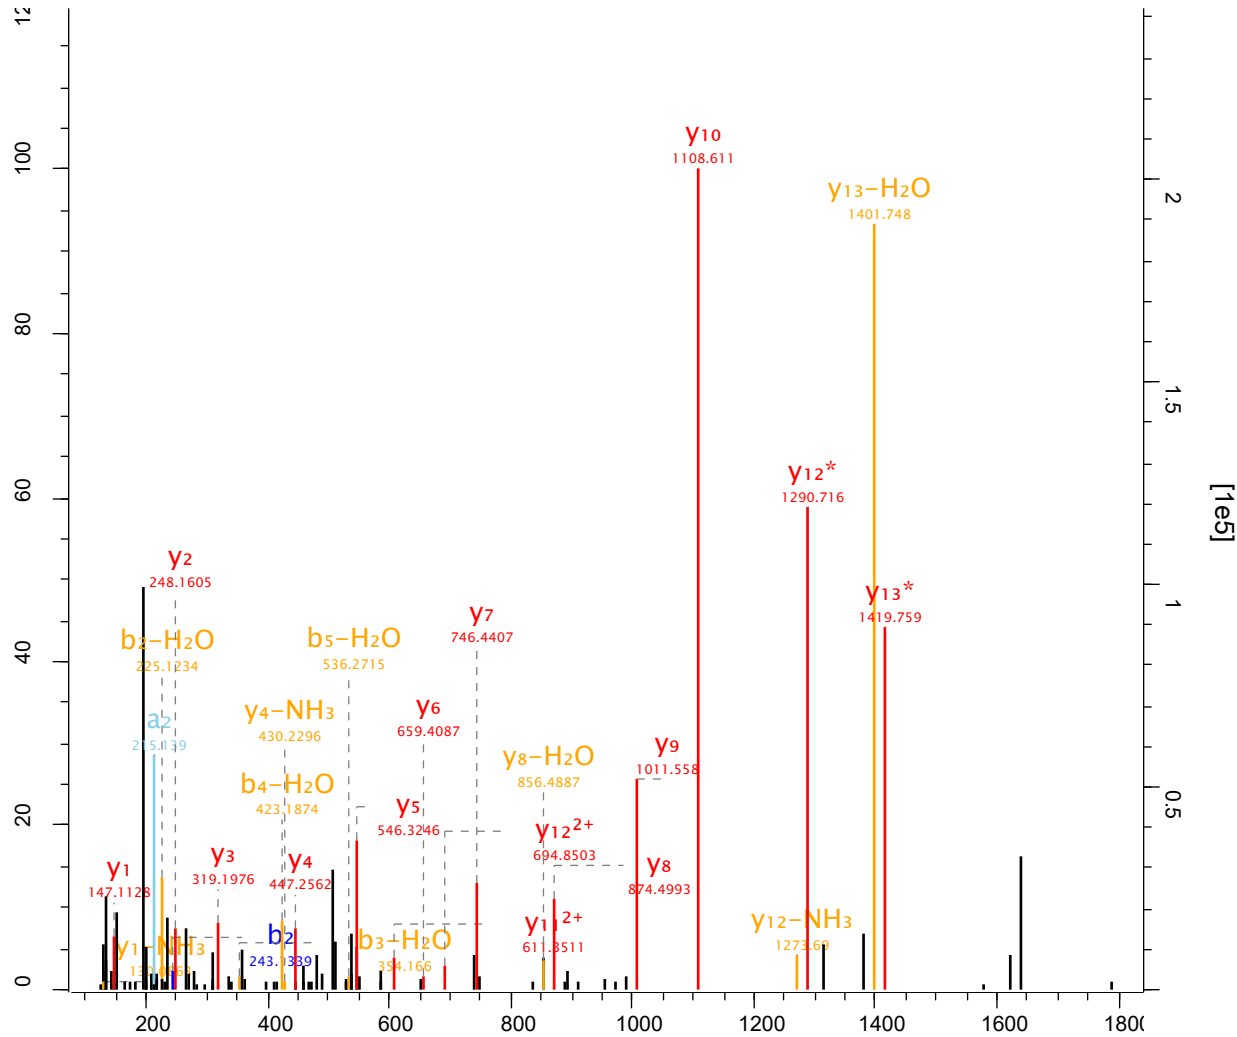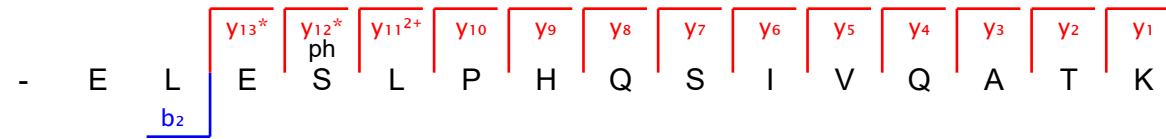

| Raw file | Scan  | Method    | Score | m/z    |
|----------|-------|-----------|-------|--------|
| sys_02_2 | 22037 | FTMS; HCD | 48.62 | 720.79 |

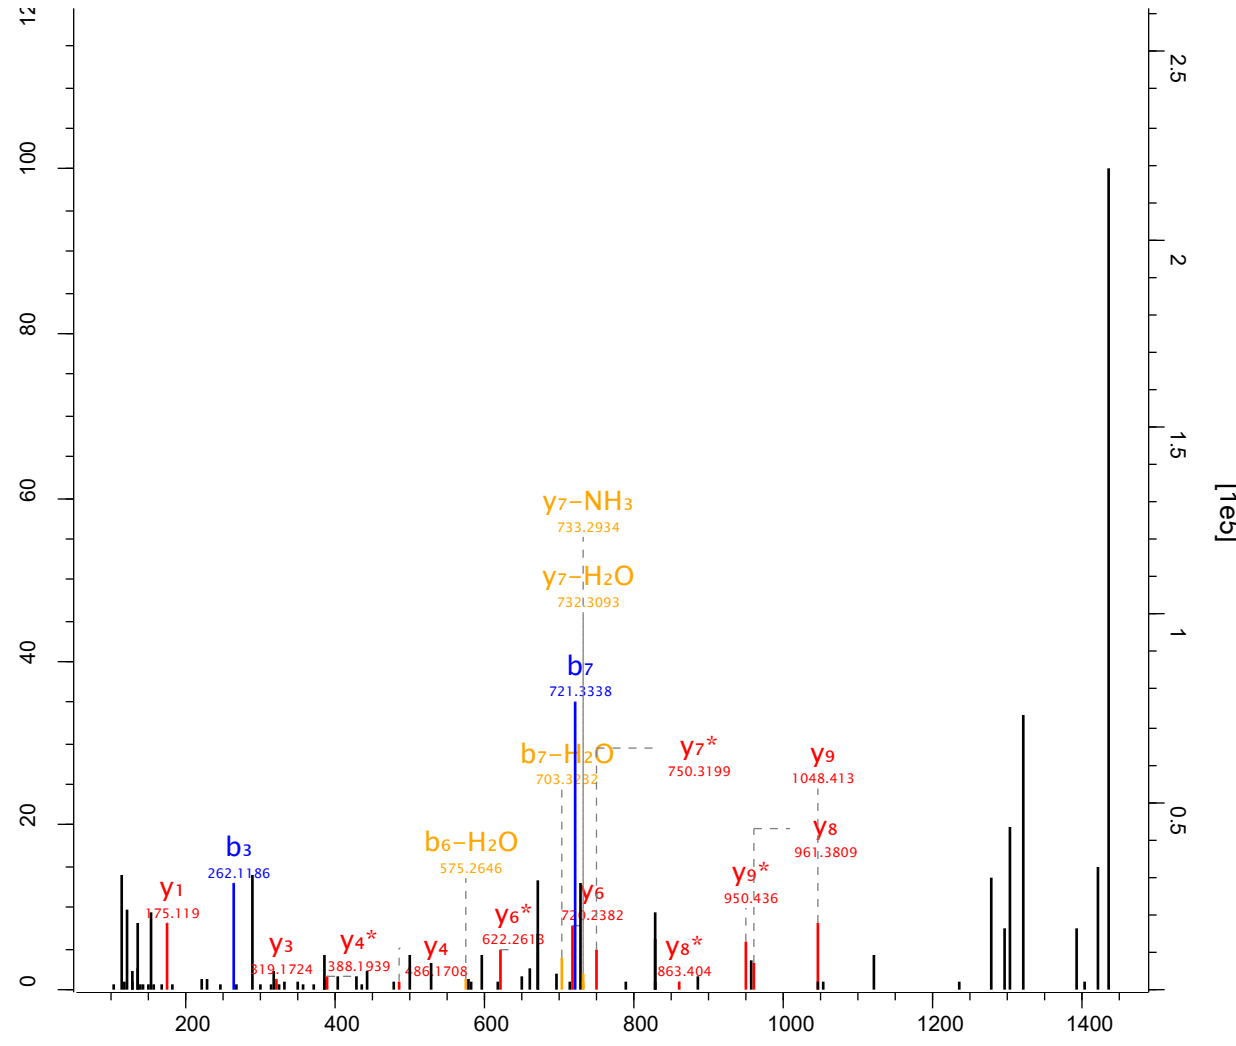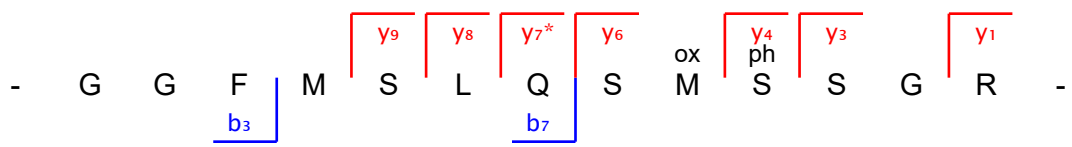



Raw file Scan Method Score m/z  
 sys\_02\_2 2210 FTMS; HCD 112.7 543.72

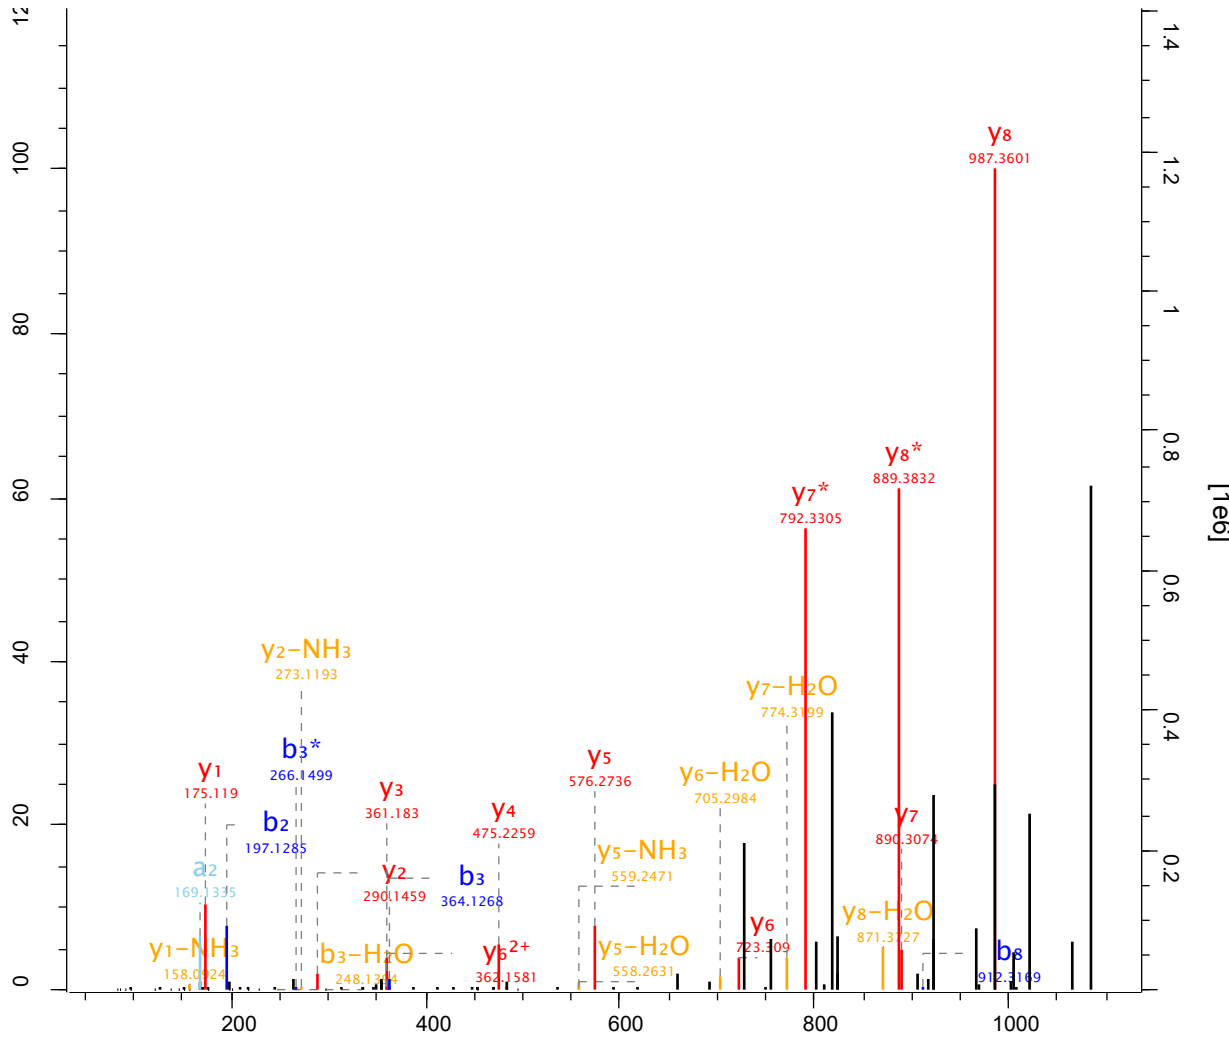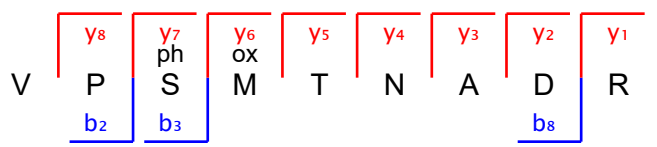

Raw file Scan Method Score m/z  
 sys\_02\_2 22151 FTMS; HCD 42.71 705.78

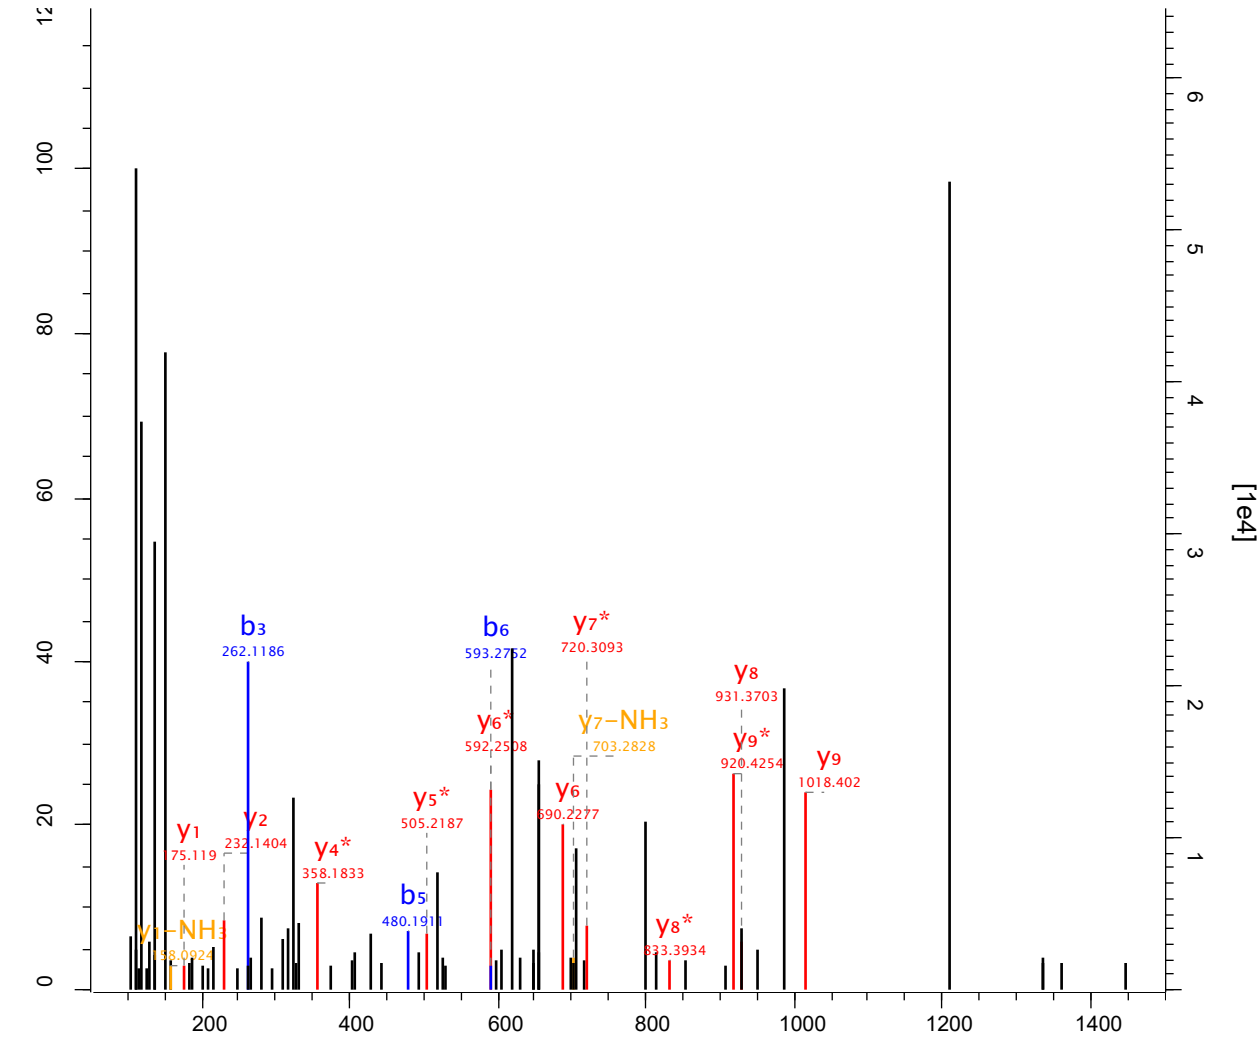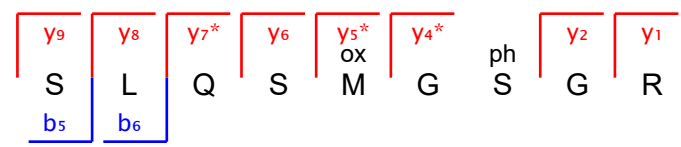

G

G

G

F

M

S

L

Q

S

M

G

S

G

R

-

b<sub>3</sub>

b<sub>5</sub>

b<sub>6</sub>

y<sub>9</sub>

y<sub>8</sub>

y<sub>7</sub><sup>\*</sup>

y<sub>6</sub>

y<sub>5</sub><sup>\*</sup>  
ox

y<sub>4</sub><sup>\*</sup>

ph

y<sub>2</sub>

y<sub>1</sub>

Raw file Scan Method Score m/z  
 sys\_02\_2 22821 FTMS; HCD 49.66 683.98

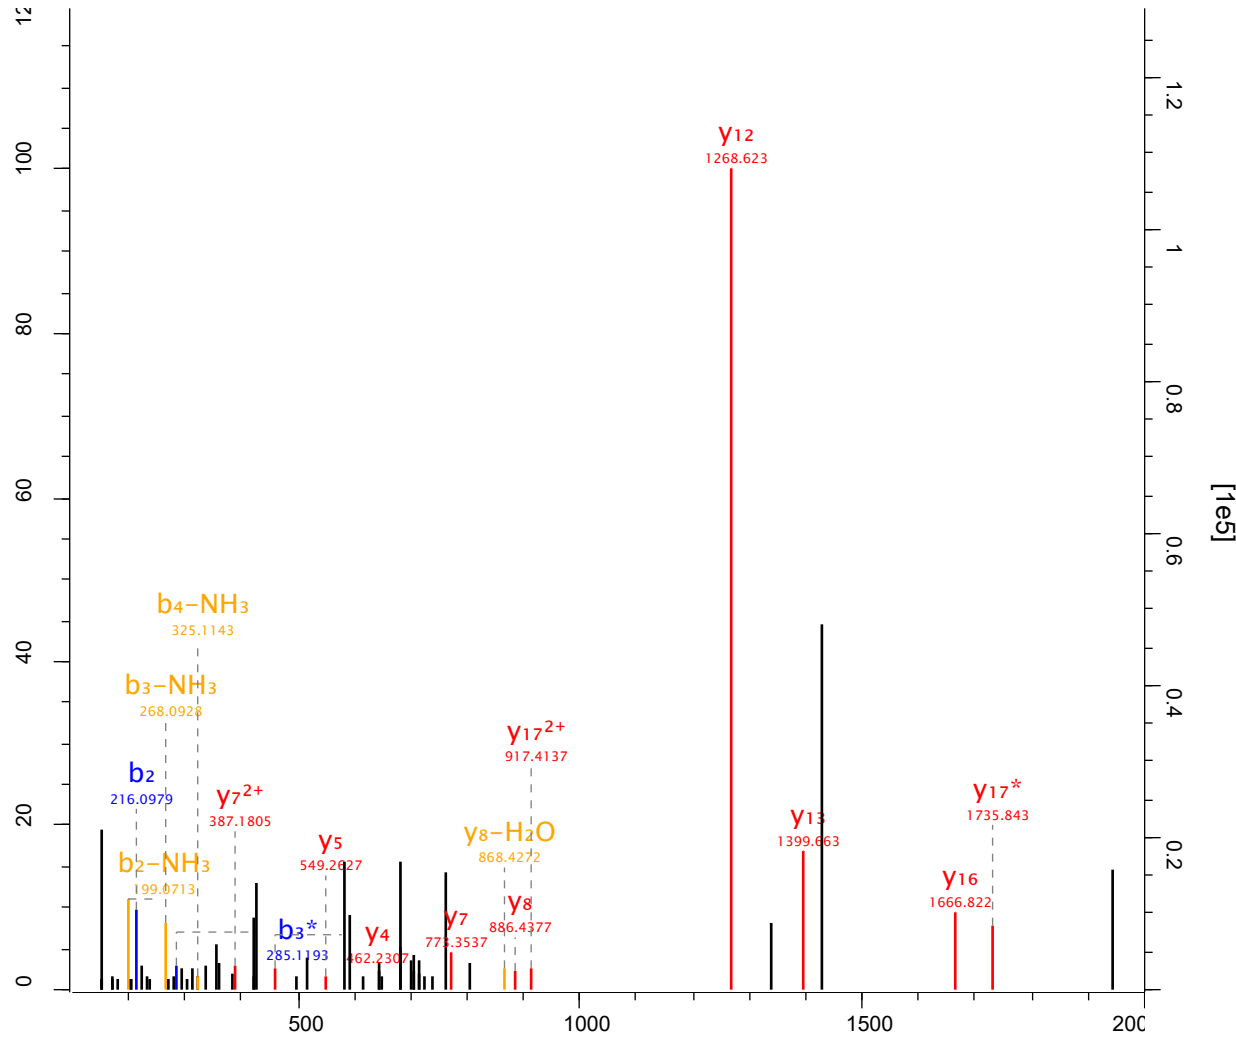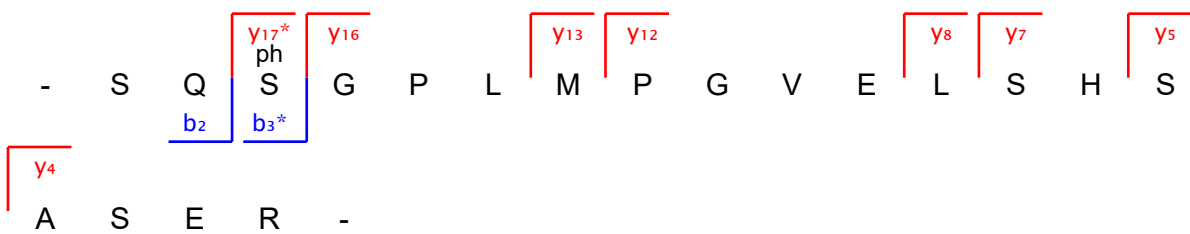

Raw file Scan Method Score m/z  
 sys\_02\_2 22888 FTMS; HCD 81.48 664.95

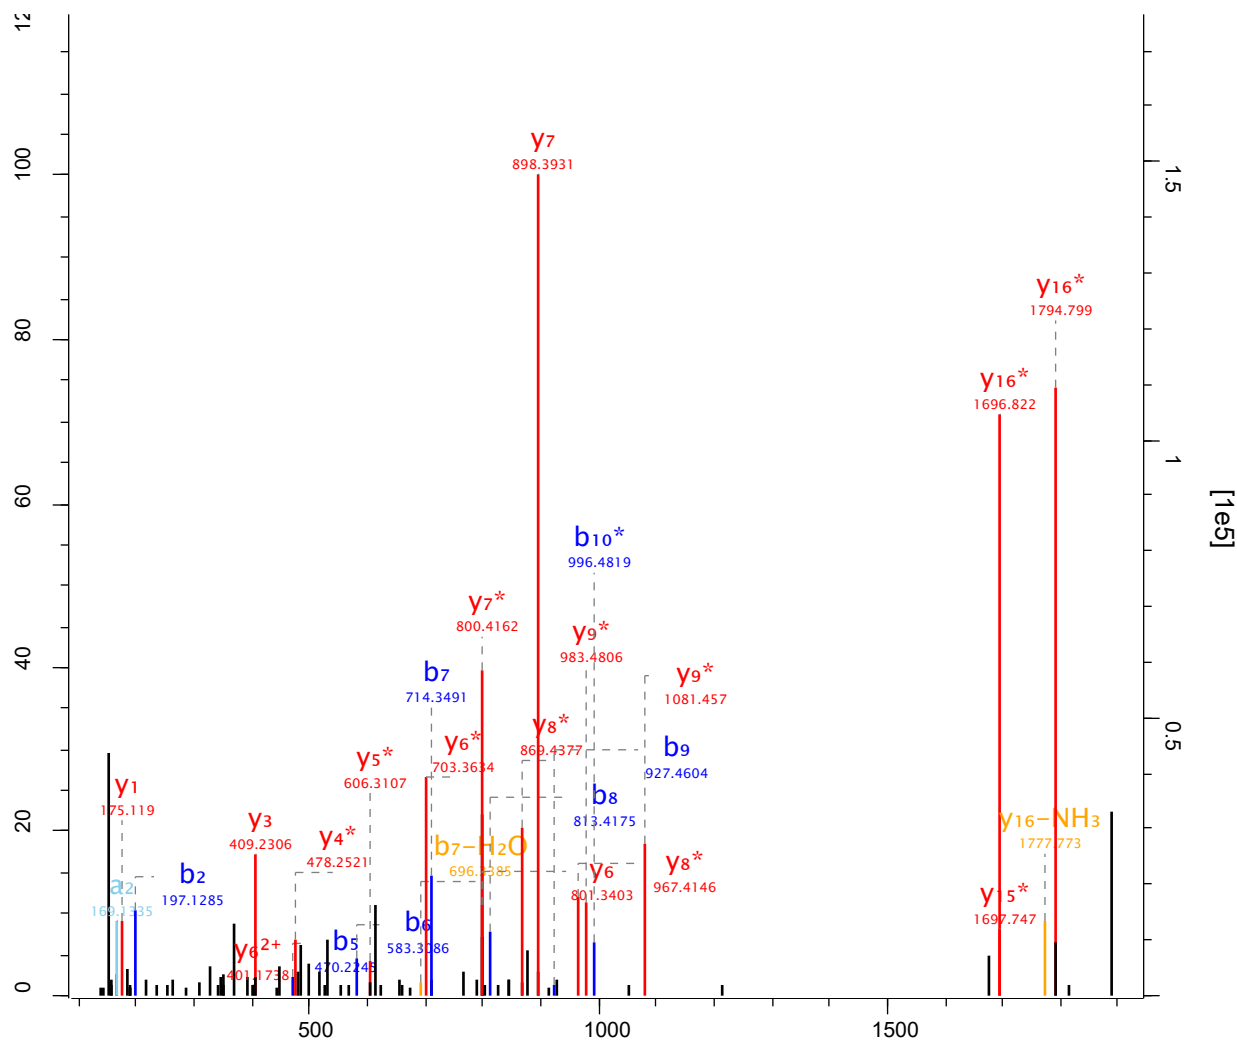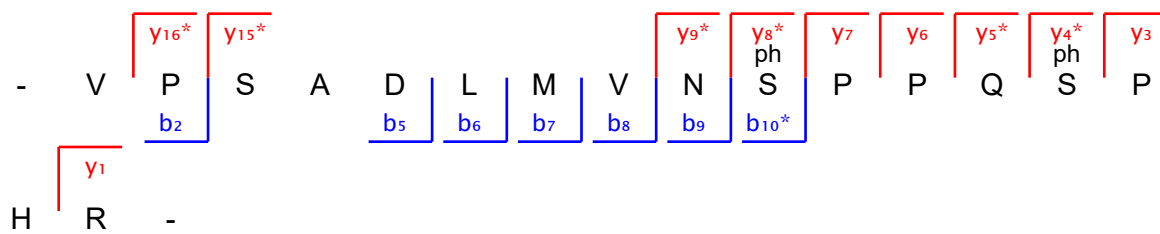

Raw file Scan Method Score m/z  
 sys\_02\_2 22939 FTMS; HCD 56.08 653.98

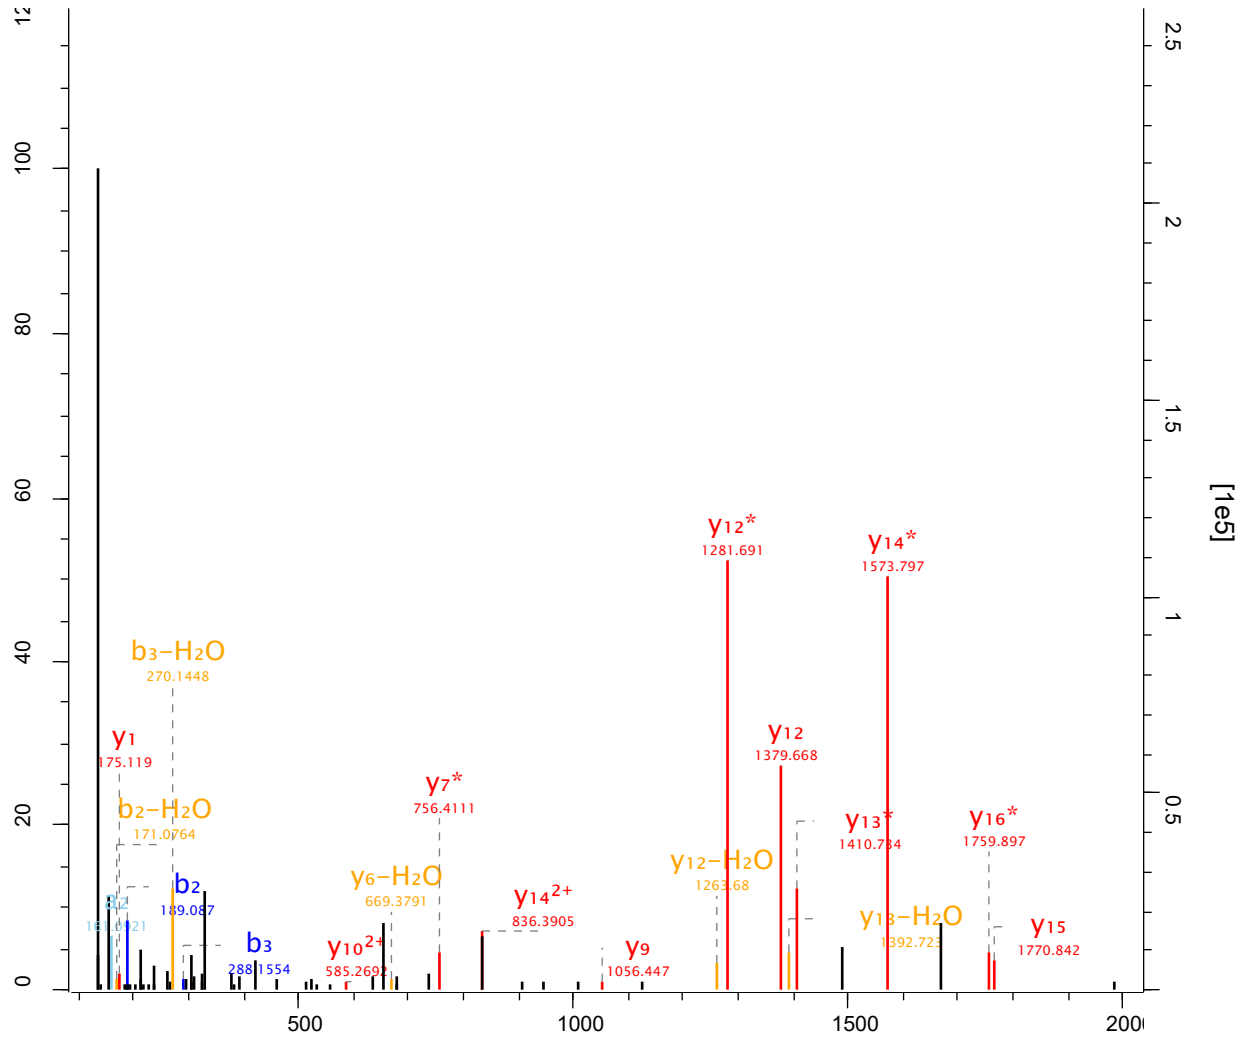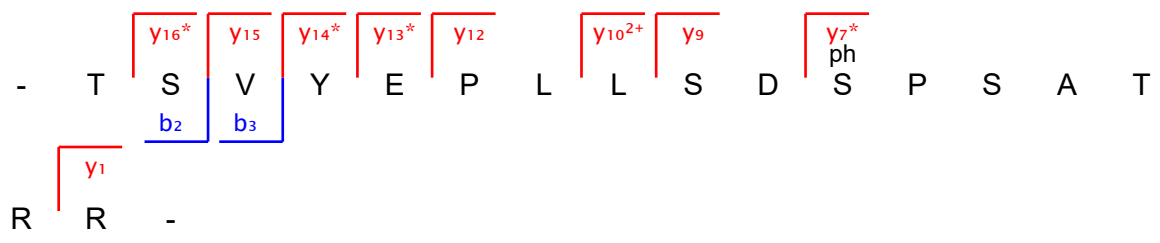

Raw file Scan Method Score m/z  
 sys\_02\_2 23023 FTMS; HCD 138.75 762.36

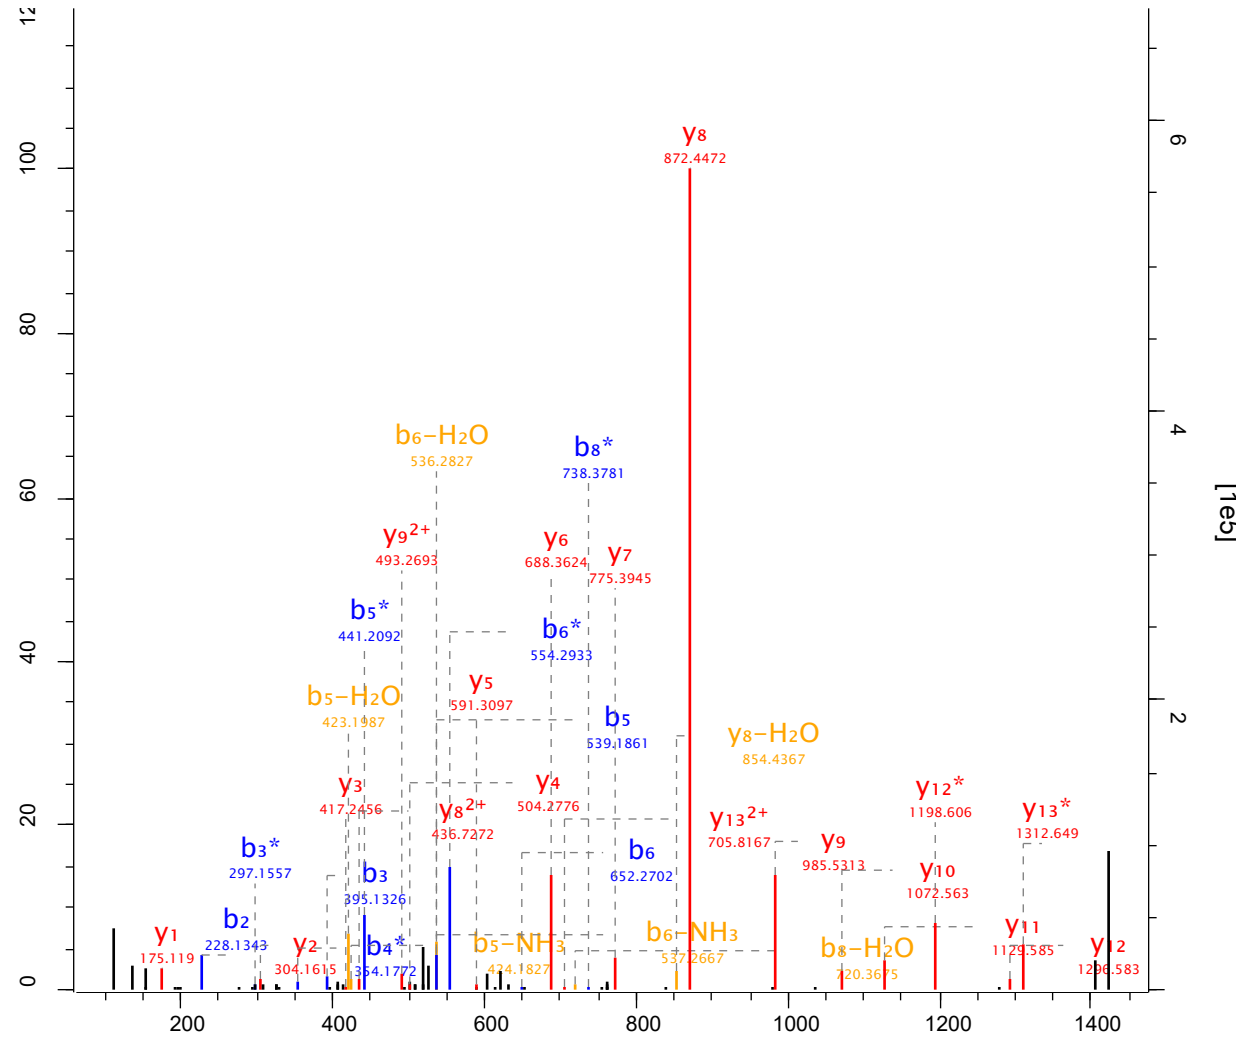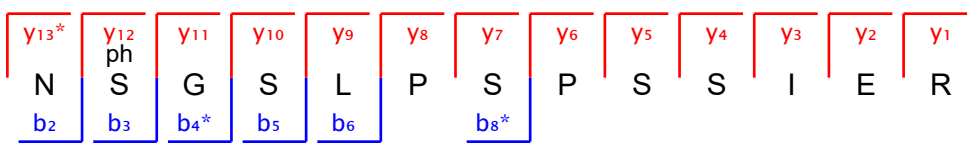

Supplement: 143488_2_supp_334105_ps5hgs.pdf [file 143488_2_supp_334105_ps5hgs.pdf]
