# Supplementary material for: The Systemin Signaling Cascade As Derived from Time Course Analyses of the Systemin-responsive Phosphoproteome
Source: PubMed Central journal article supplement (PMC6683004; doi:10.1074/mcp.ra119.001367), 2019-05-28

**Supplementary Figure 2:** Representative annotated spectra of identified phosphopeptides under systemin,A17 and water treatment as exported from MaxQuant.

Raw file Scan Method Score m/z  
 sys\_02\_2 23101 FTMS; HCD 75.56 786.84

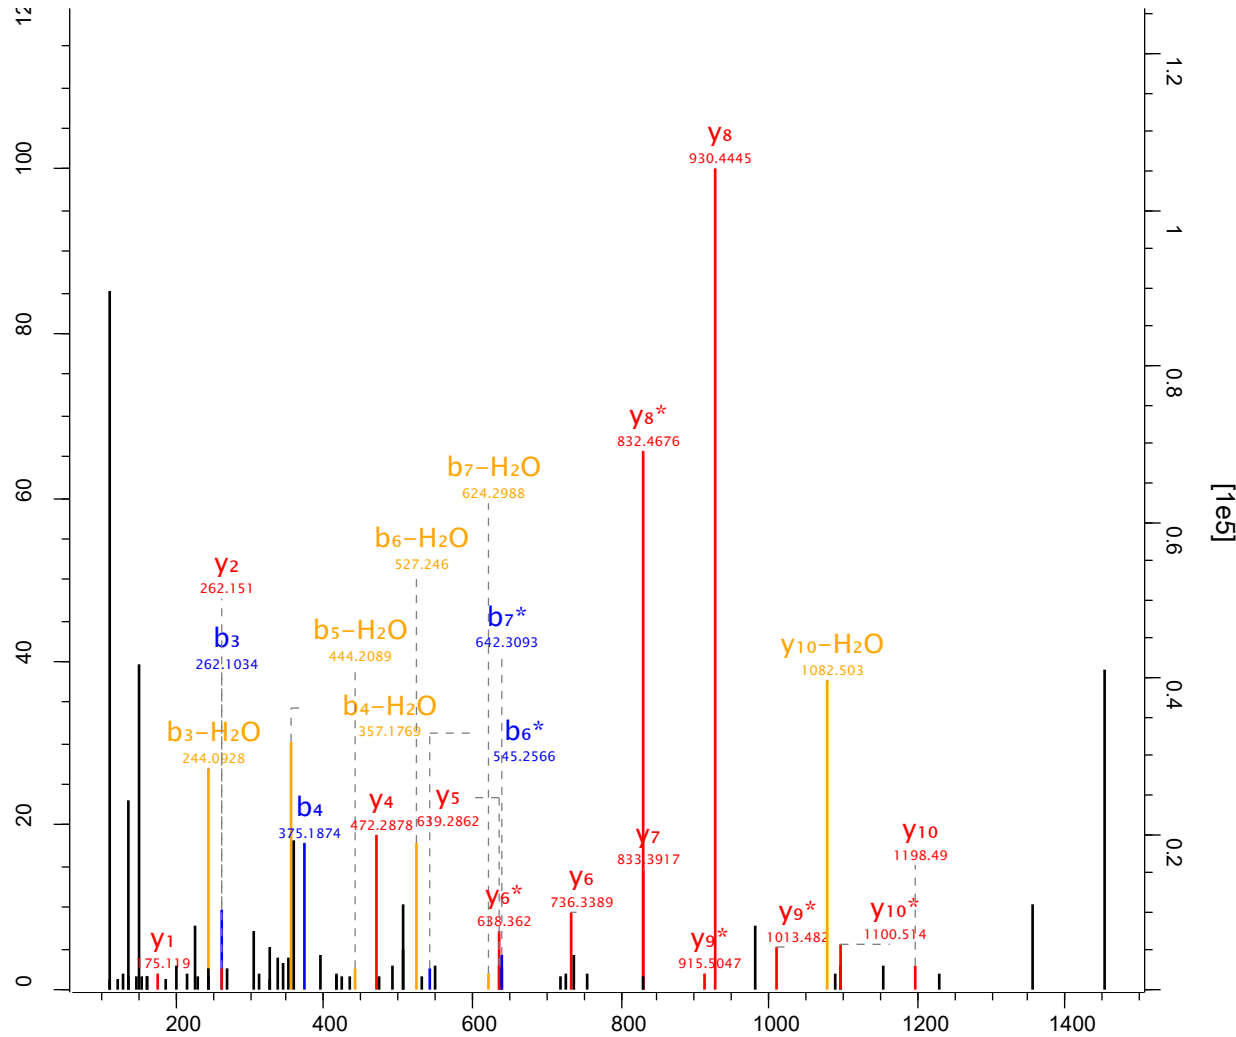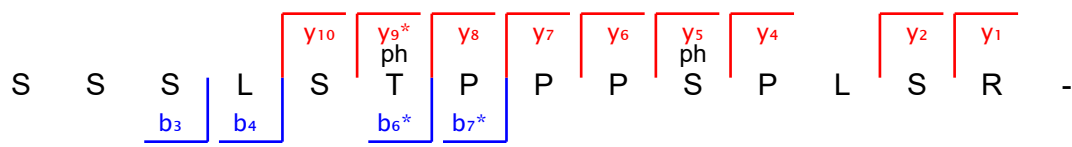

Raw file Scan Method Score m/z  
 sys\_02\_2 23556 FTMS; HCD 124.32 933.06

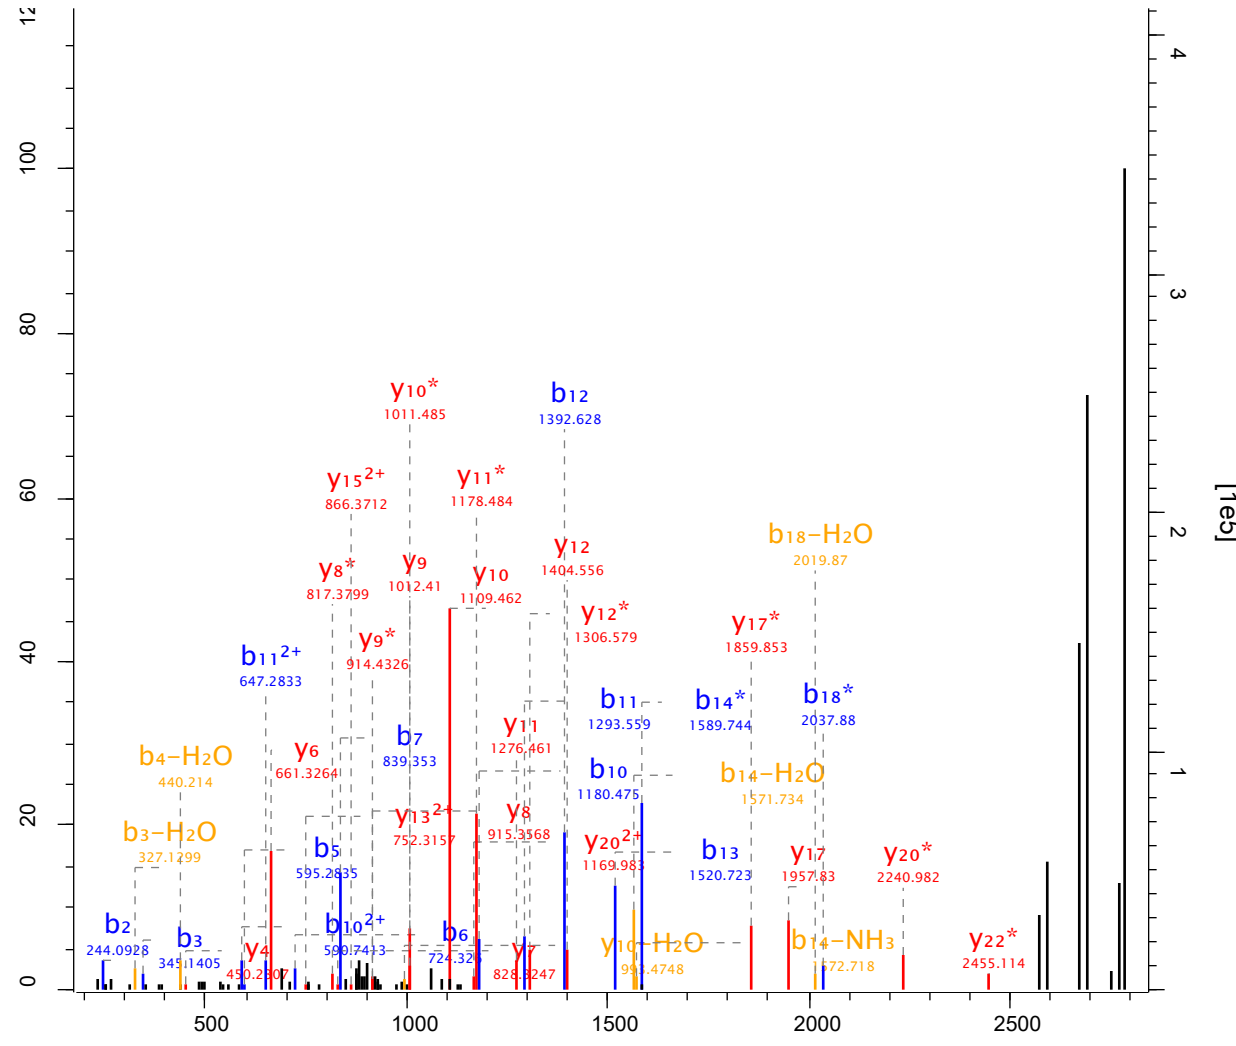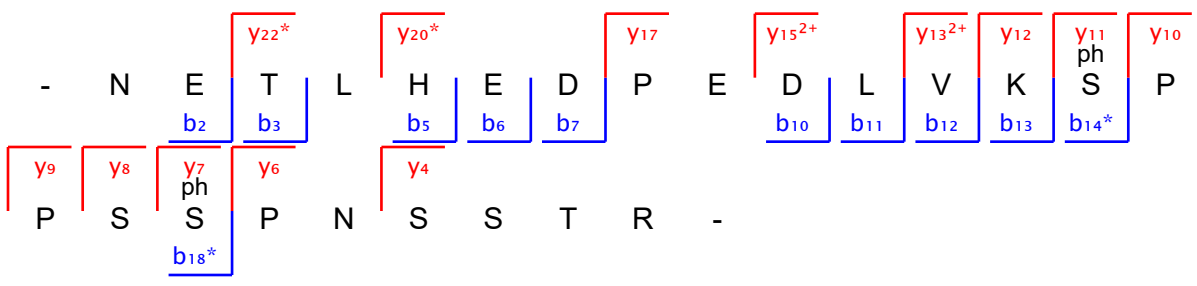

Raw file Scan Method Score m/z  
 sys\_02\_2 23588 FTMS; HCD 117.7 636.31

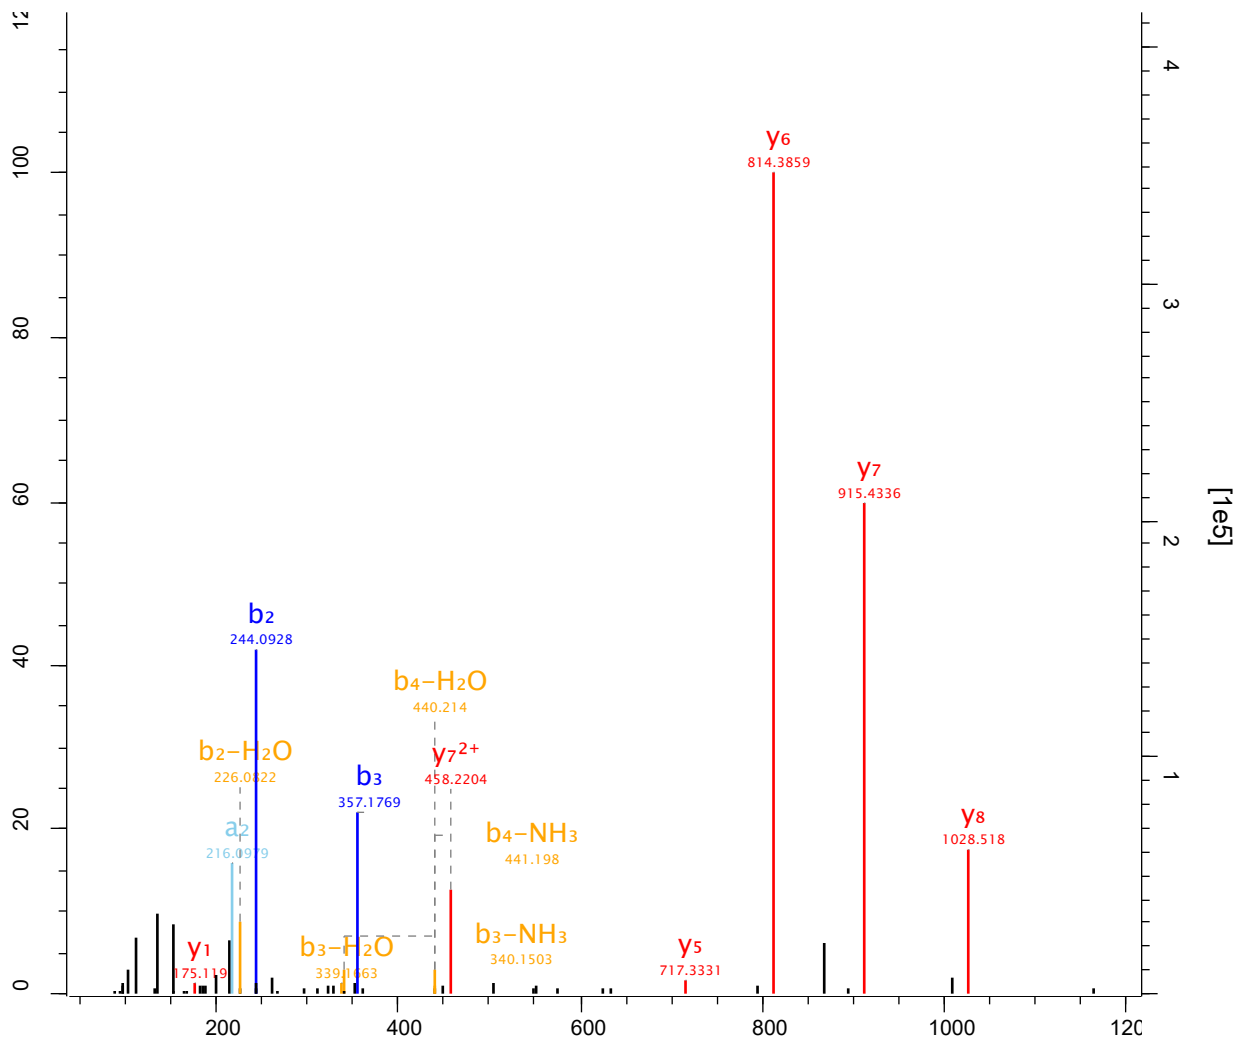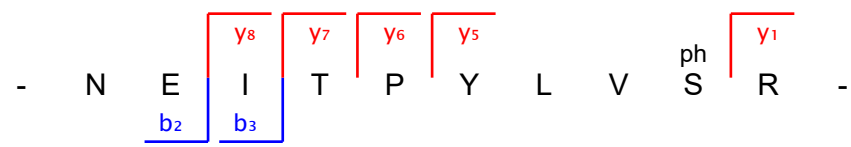



Raw file Scan Method Score m/z  
 sys\_02\_2 23839 FTMS; HCD 89.66 939.41

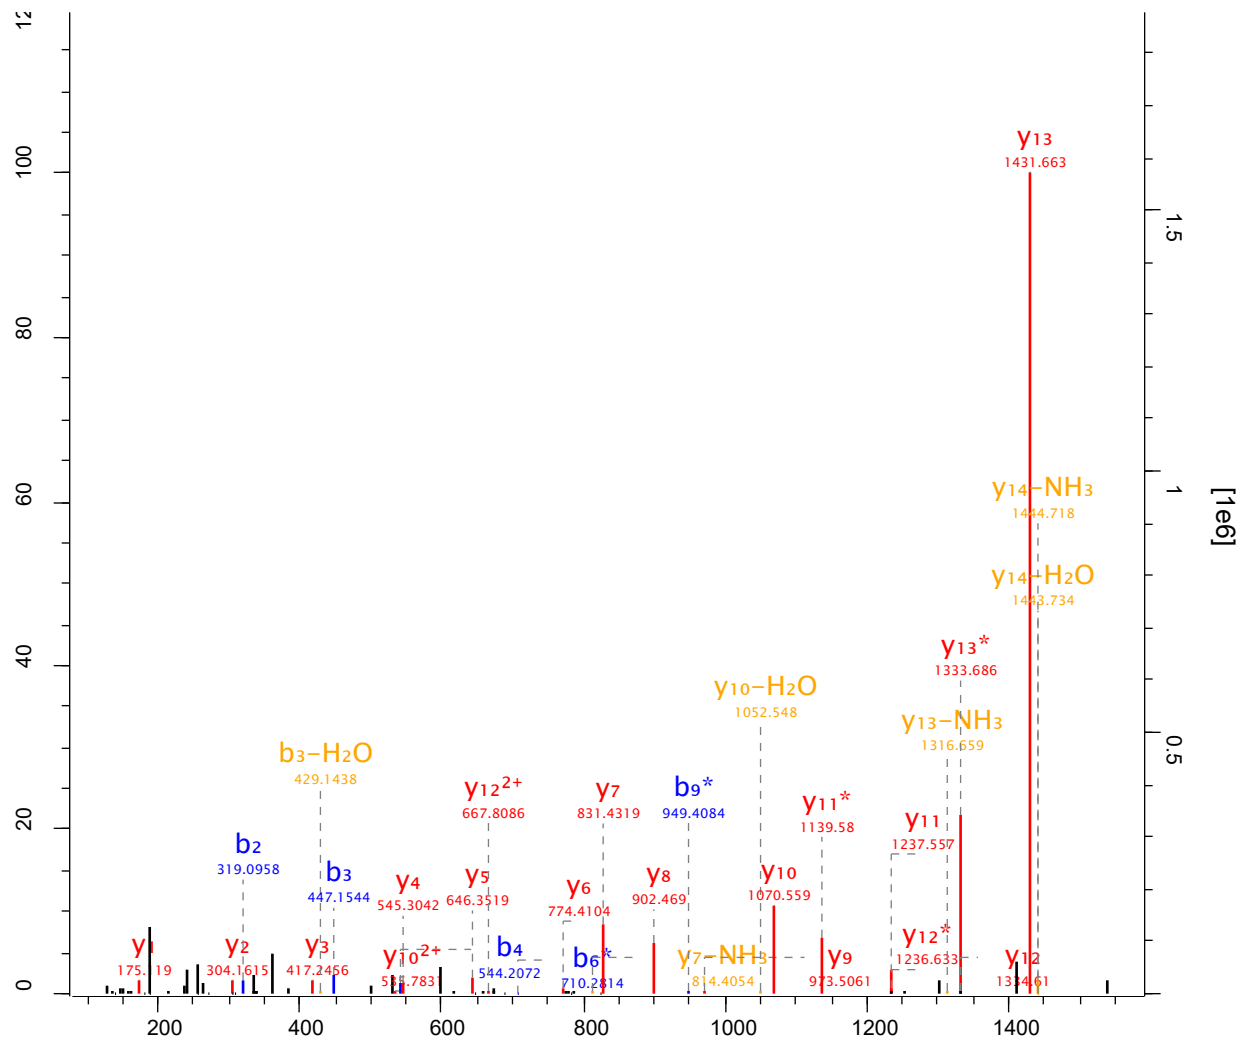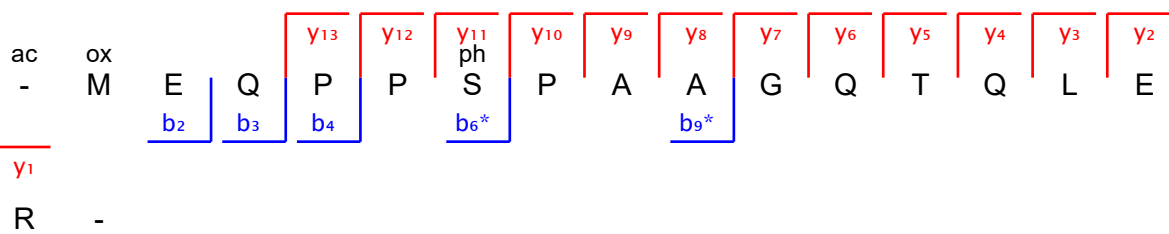

Raw file Scan Method Score m/z  
 sys\_02\_2 23919 FTMS; HCD 158.25 537.77

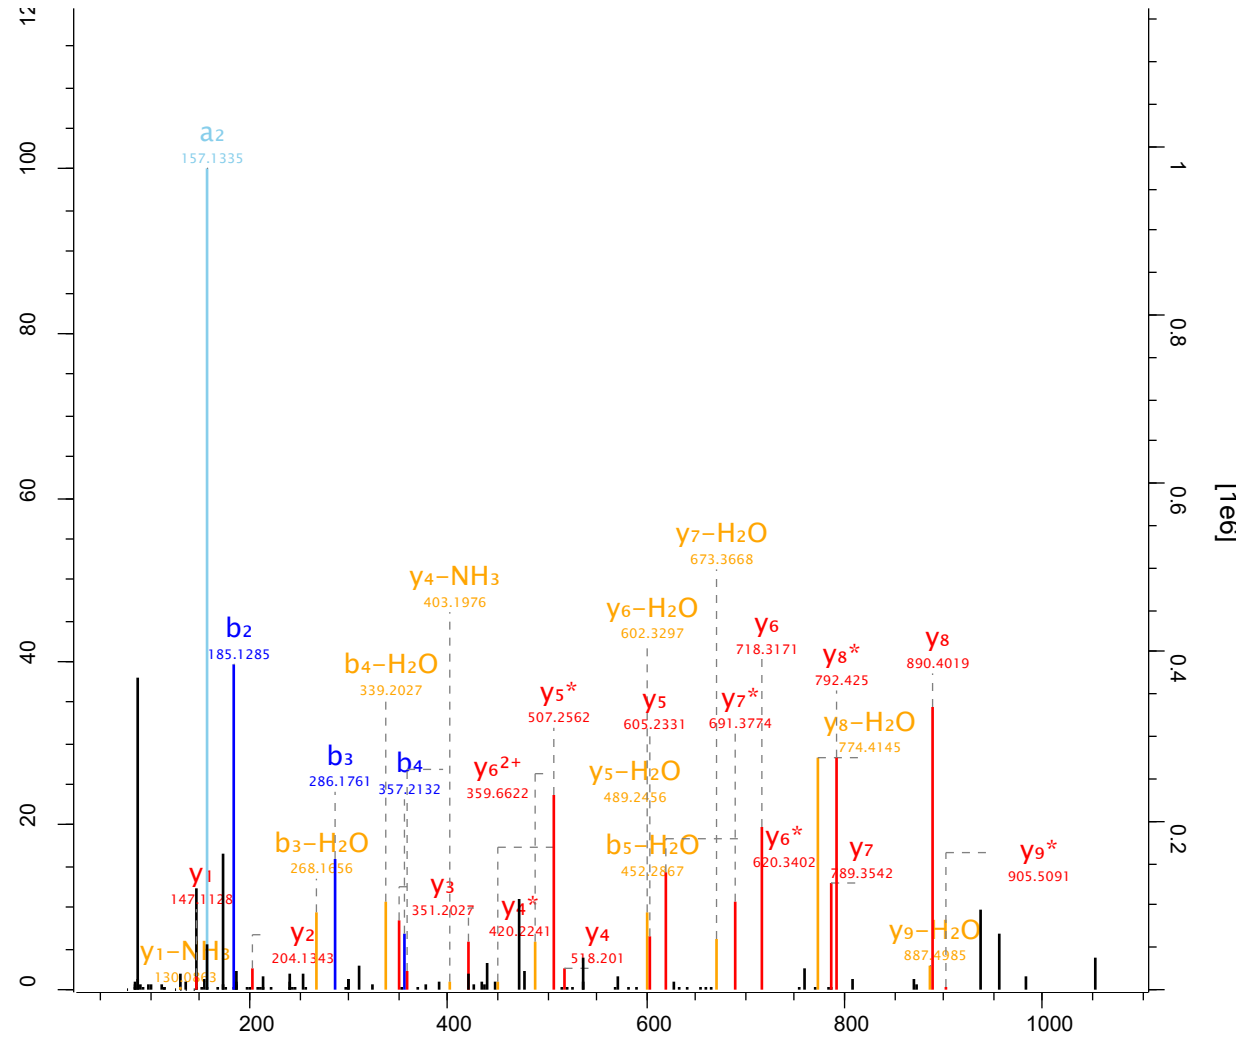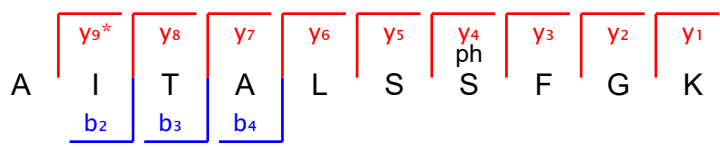

Raw file Scan Method Score m/z  
 sys\_02\_2 24054 FTMS; HCD 229.51 920.39

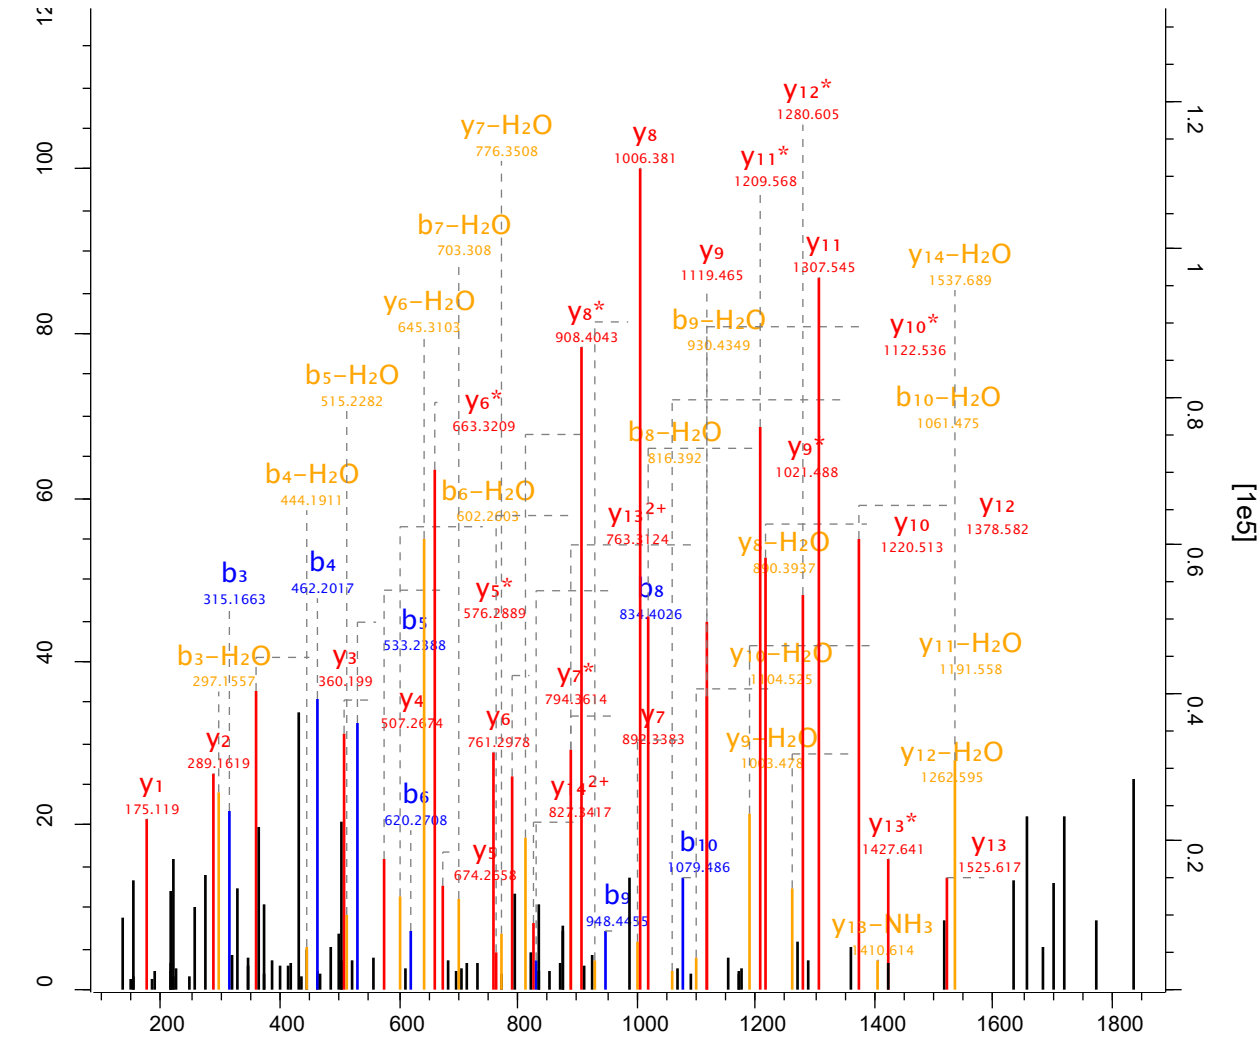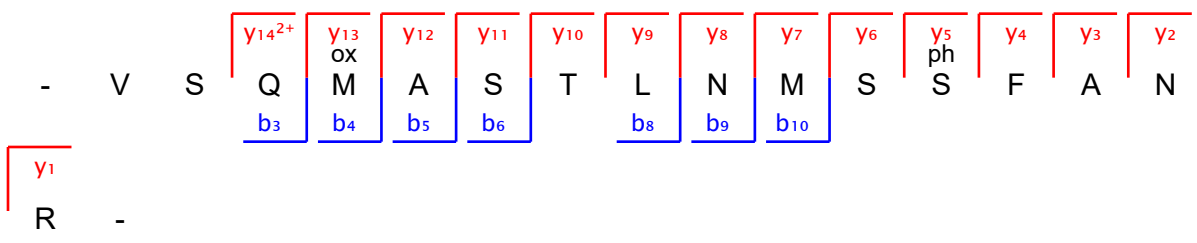

| Raw file | Scan  | Method    | Score | m/z    |
|----------|-------|-----------|-------|--------|
| sys_02_2 | 24114 | FTMS; HCD | 44.34 | 790.72 |

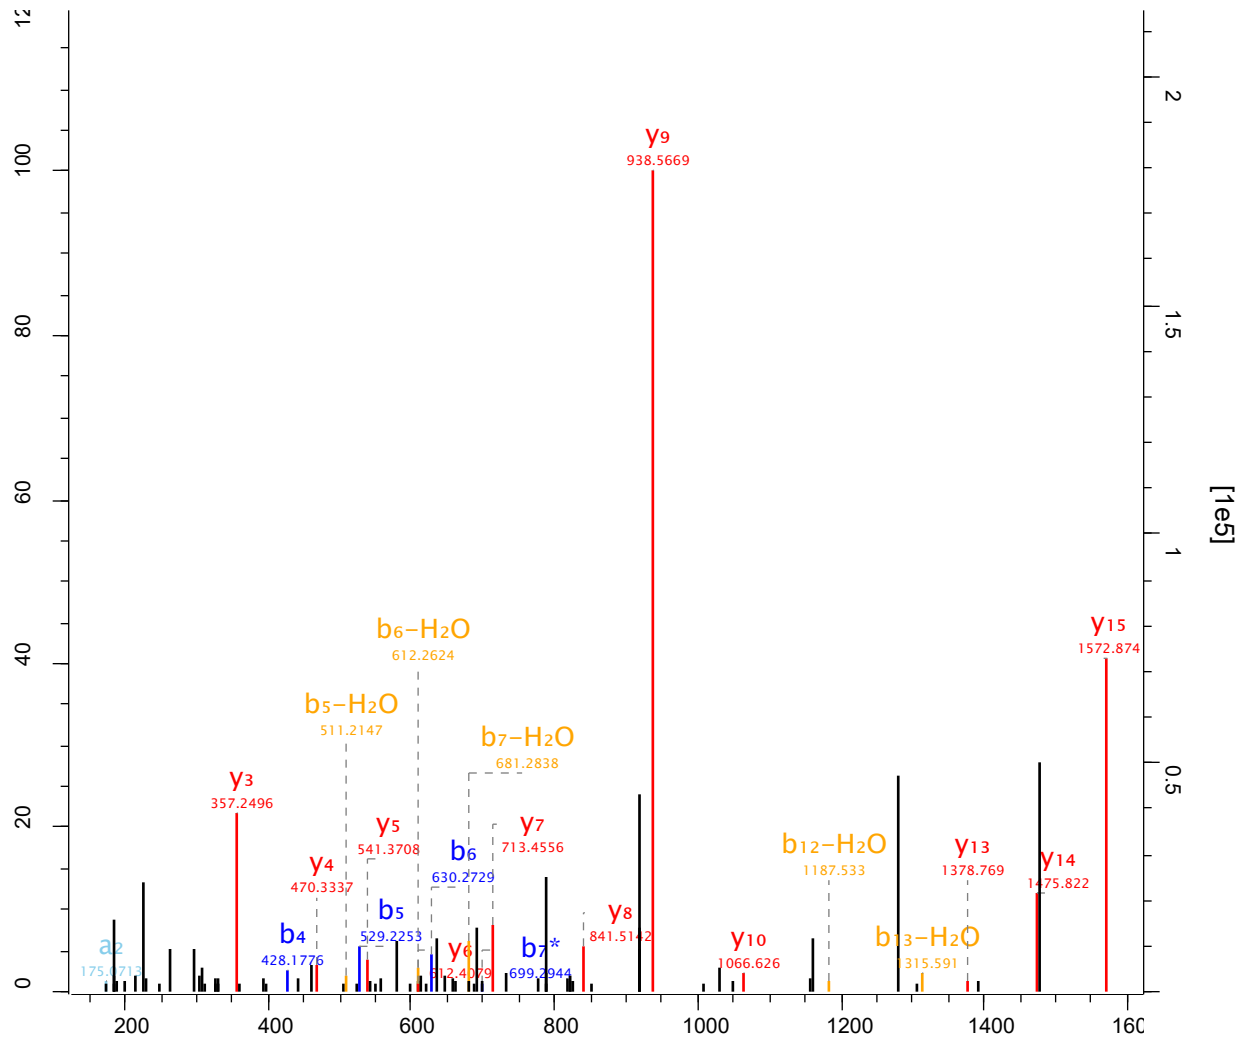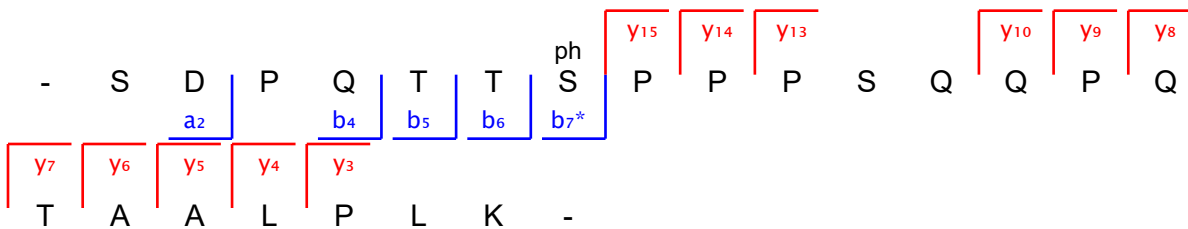

Raw file Scan Method Score m/z  
 sys\_02\_2 24136 FTMS; HCD 67.4 880.9

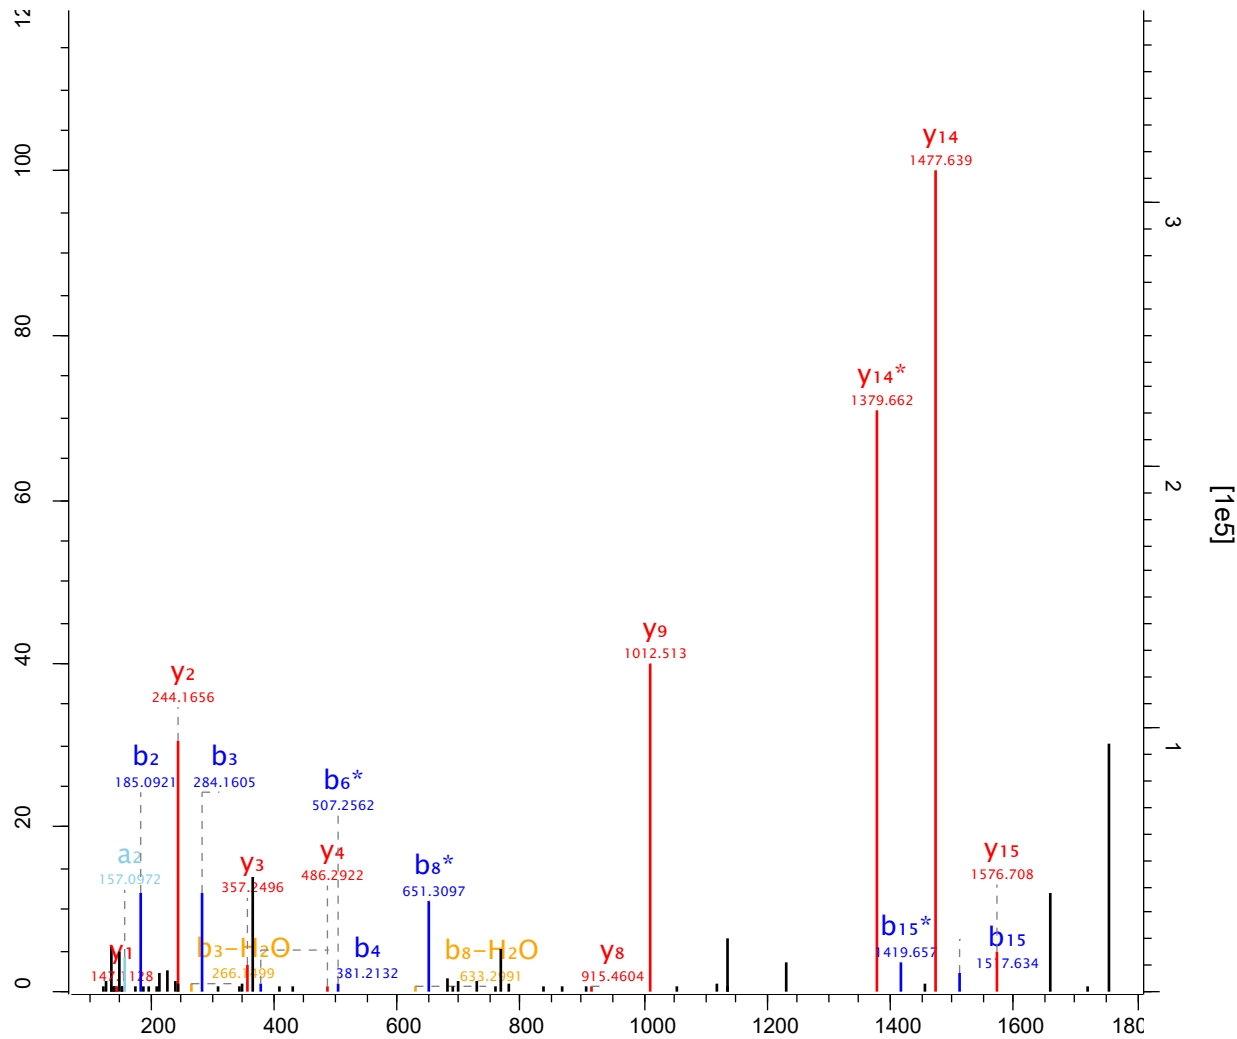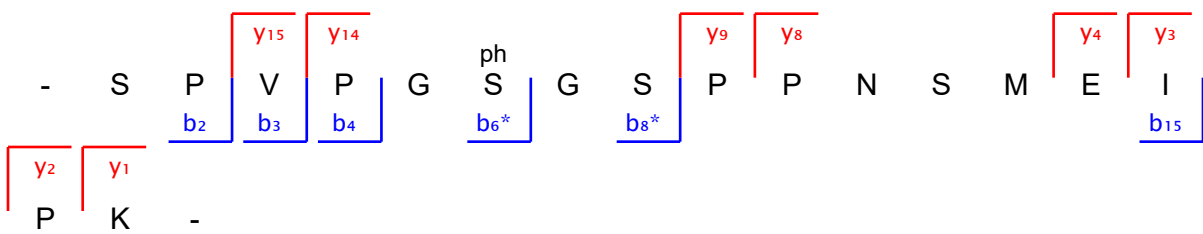

Raw file Scan Method Score m/z  
 sys\_02\_2 24208 FTMS; HCD 45.28 572.76

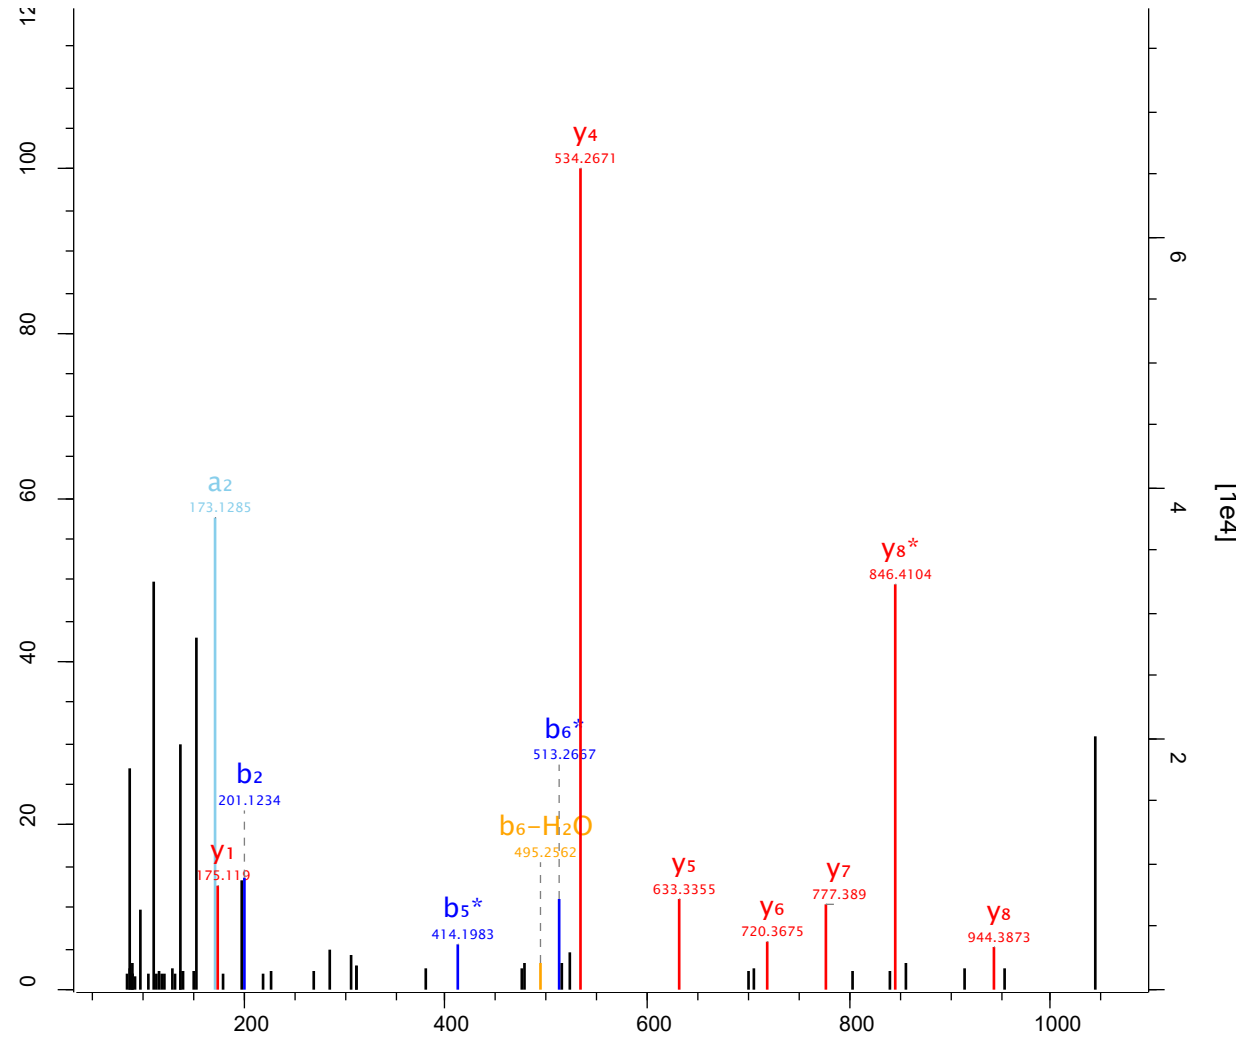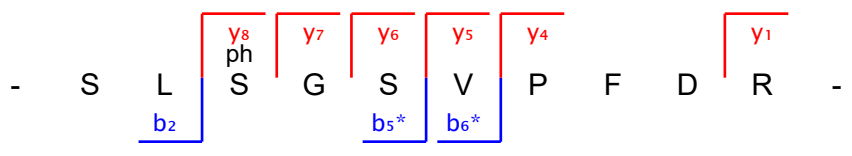

| Raw file | Scan | Method    | Score | m/z    |
|----------|------|-----------|-------|--------|
| sys_02_2 | 2445 | FTMS; HCD | 42.34 | 525.68 |

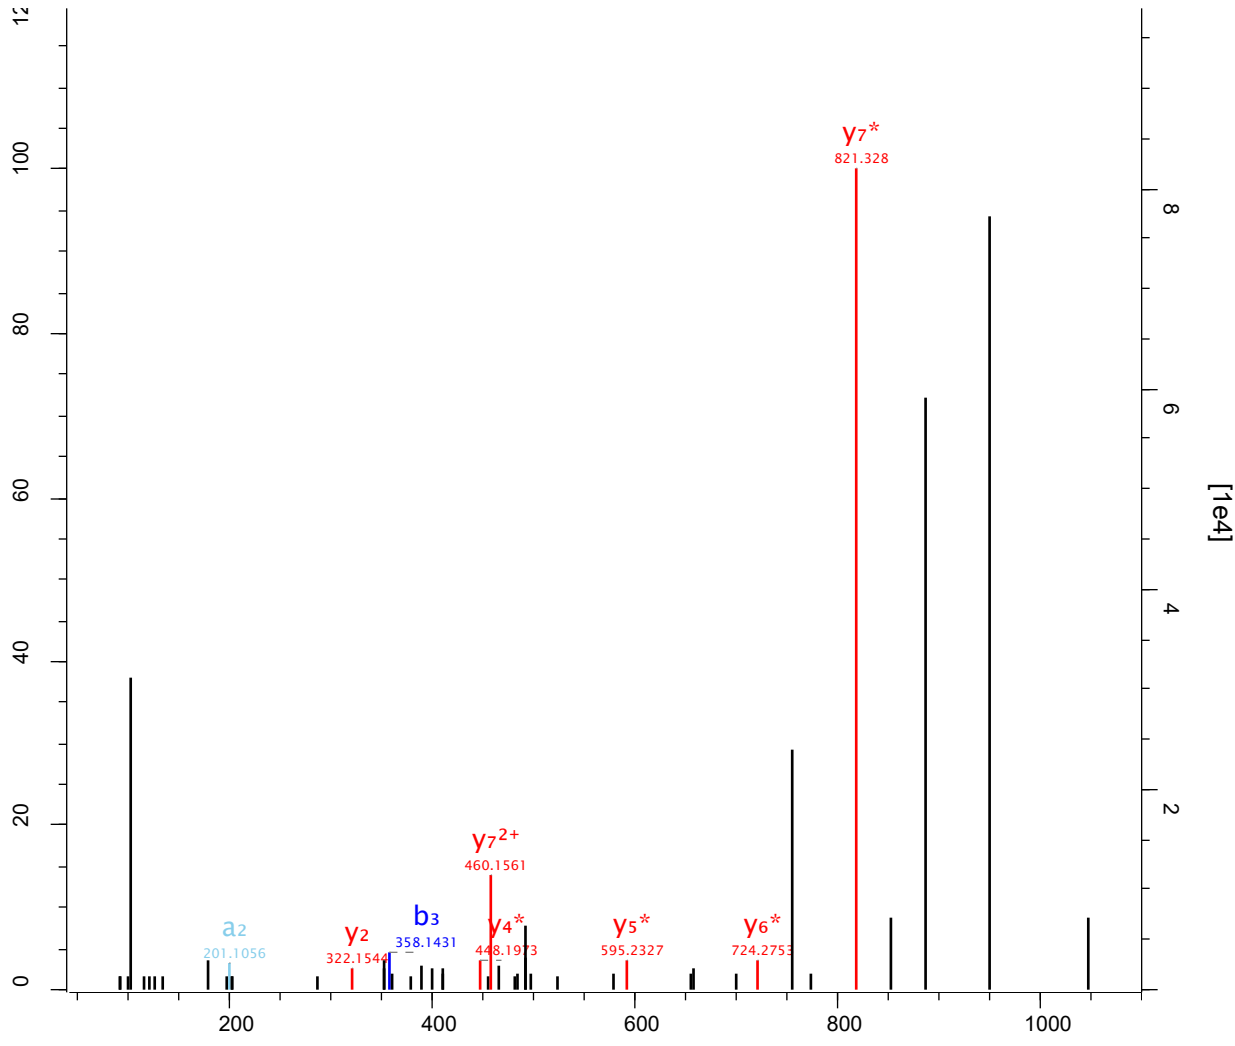

- M  $y_7^*$  P  $y_6^*$  E  $y_5^*$  M  $y_4^*$  G ph S  $y_2$  ox M R -

$a_2$   $b_3$

Raw file Scan Method Score m/z  
 sys\_02\_2 24655 FTMS; HCD 115.42 499.26

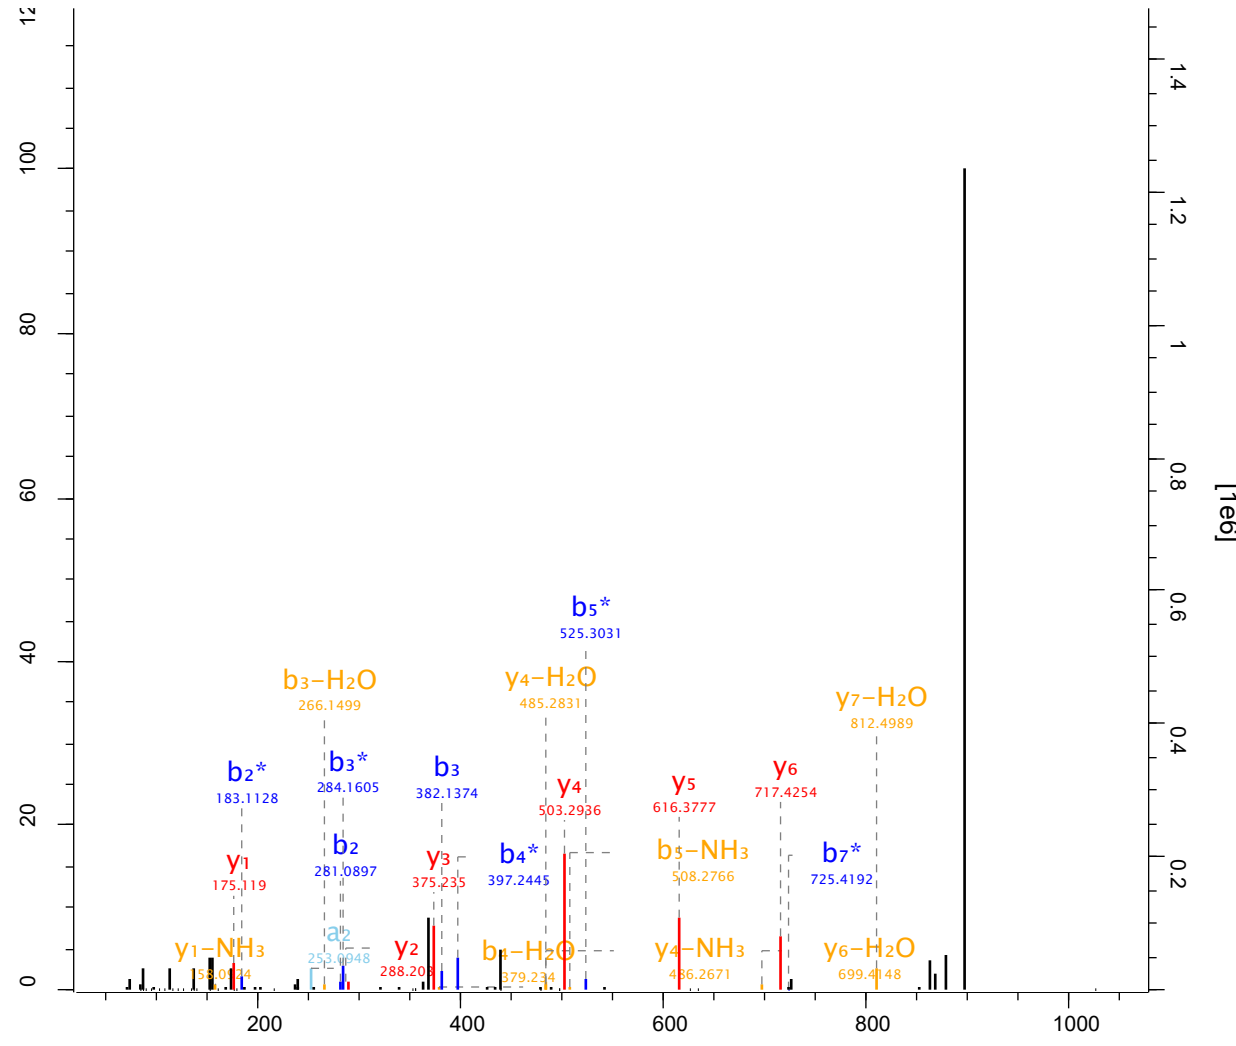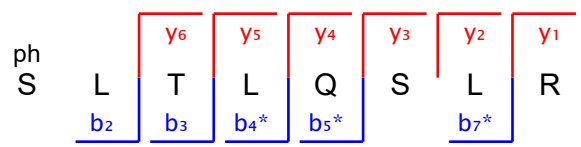



Raw file Scan Method Score m/z  
 sys\_02\_2 25351 FTMS; HCD 127.2 1027.12

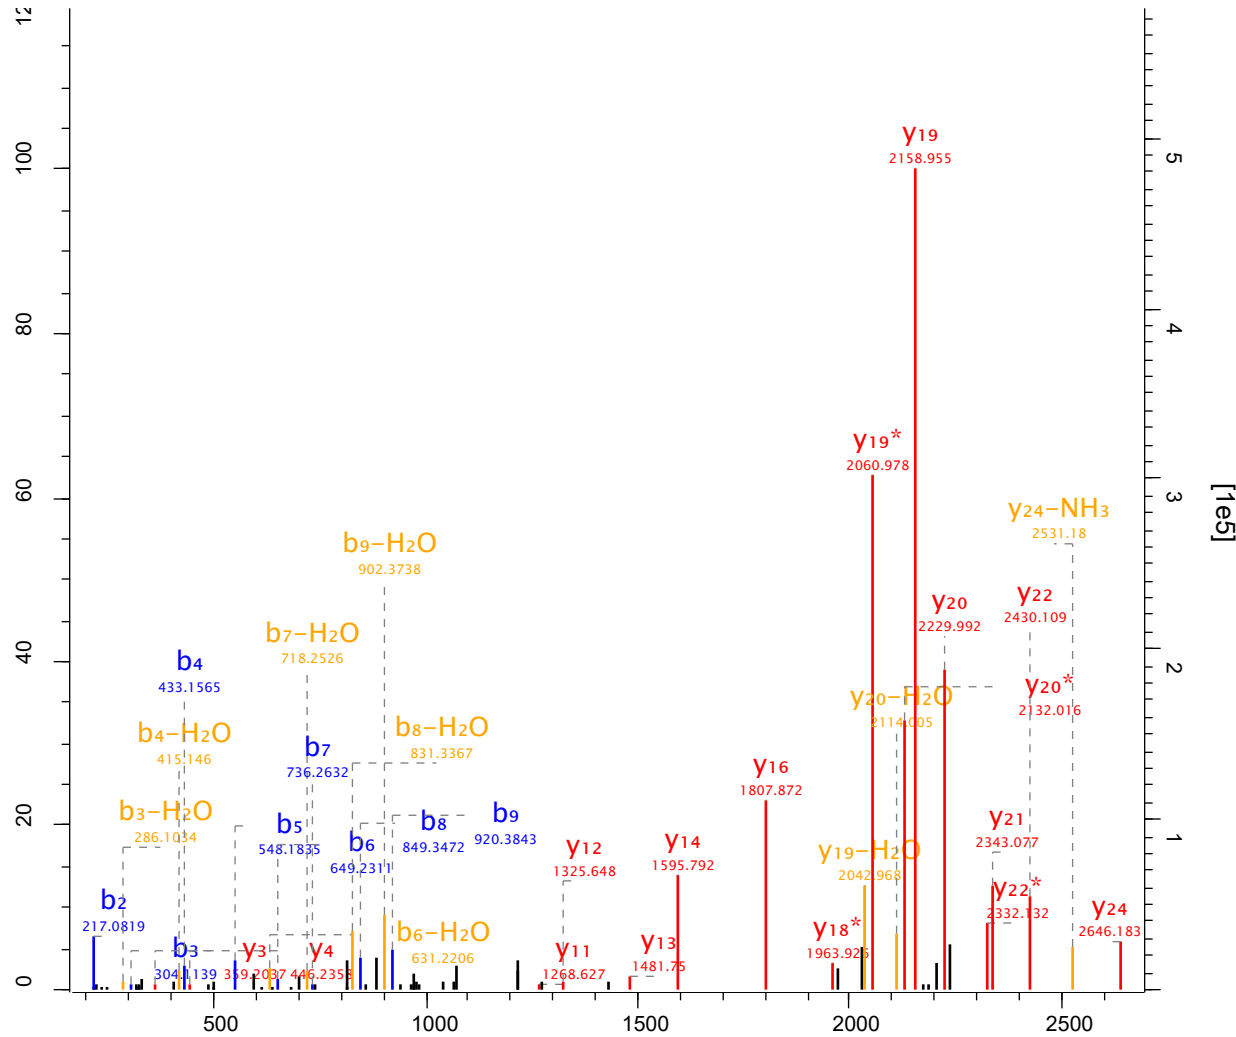

- T D S E D T S L A P S S P D N  
 b<sub>2</sub> b<sub>3</sub> b<sub>4</sub> b<sub>5</sub> b<sub>6</sub> b<sub>7</sub> b<sub>8</sub> b<sub>9</sub>  
 y<sub>13</sub> y<sub>12</sub> y<sub>11</sub> y<sub>4</sub> y<sub>3</sub> y<sub>24</sub> y<sub>22</sub> y<sub>21</sub> y<sub>20</sub> y<sub>19</sub> y<sub>18</sub><sup>\*</sup> y<sub>16</sub> y<sub>14</sub>  
 R G P T A Y Y V Q S P S R -

Raw file Scan Method Score m/z  
 sys\_02\_2 25751 FTMS; HCD 199.09 782.87

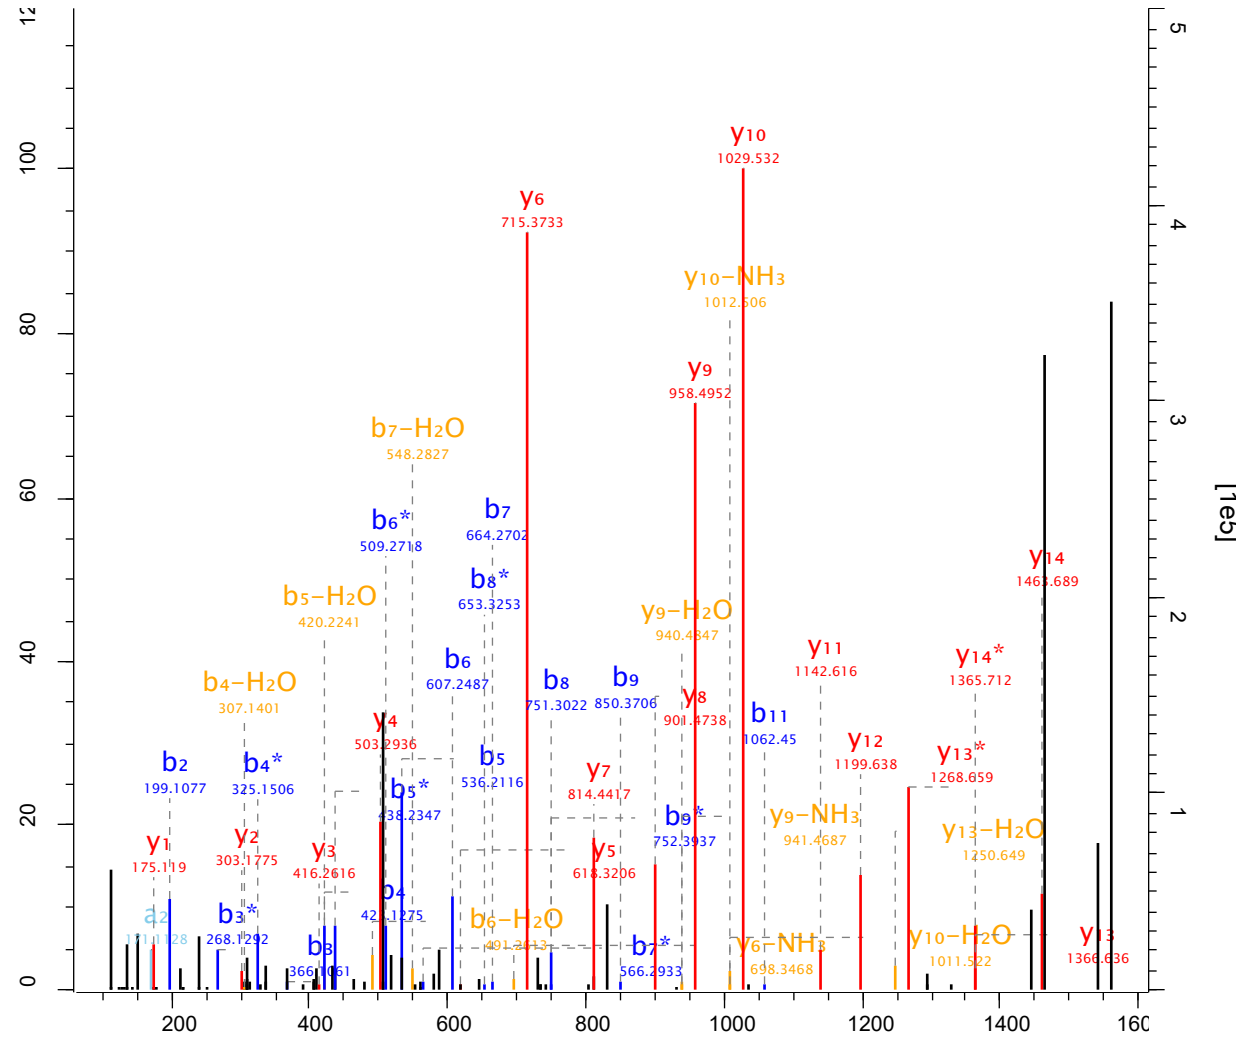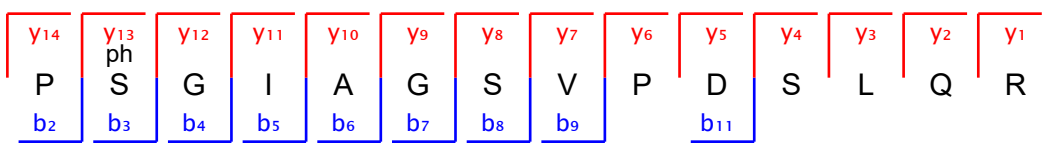

Raw file Scan Method Score m/z  
 sys\_02\_2 25862 FTMS; HCD 219.23 682.35

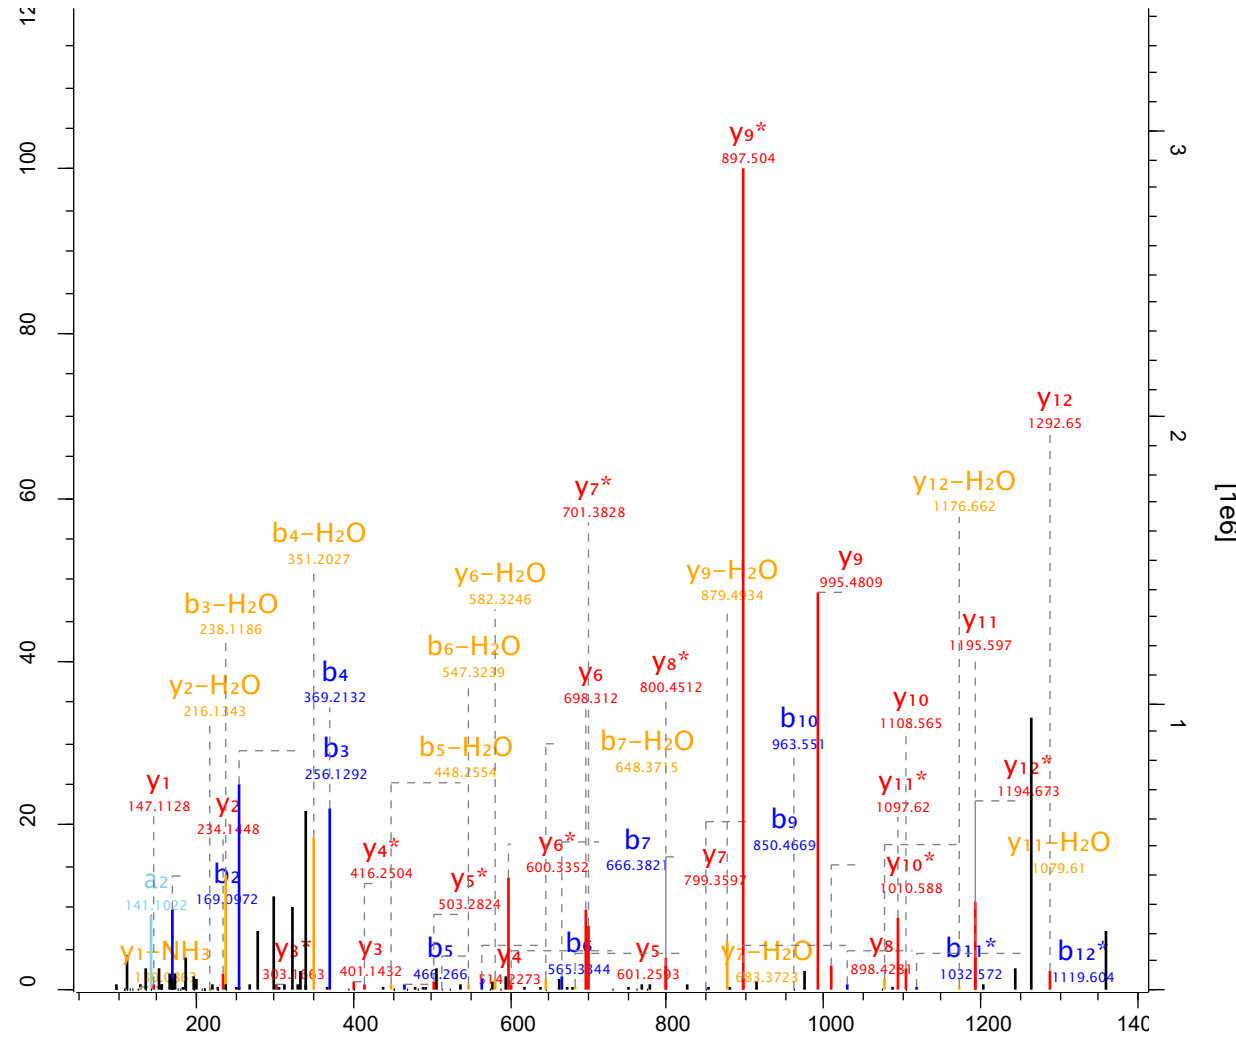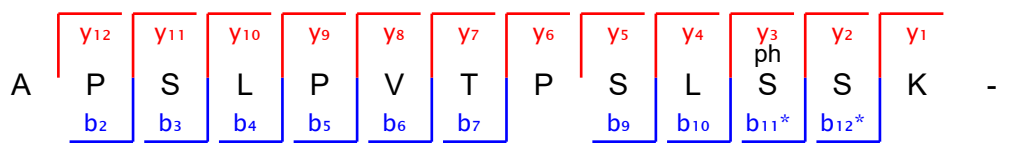

Raw file Scan Method Score m/z  
 sys\_02\_2 2598 FTMS; HCD 119.54 625.8

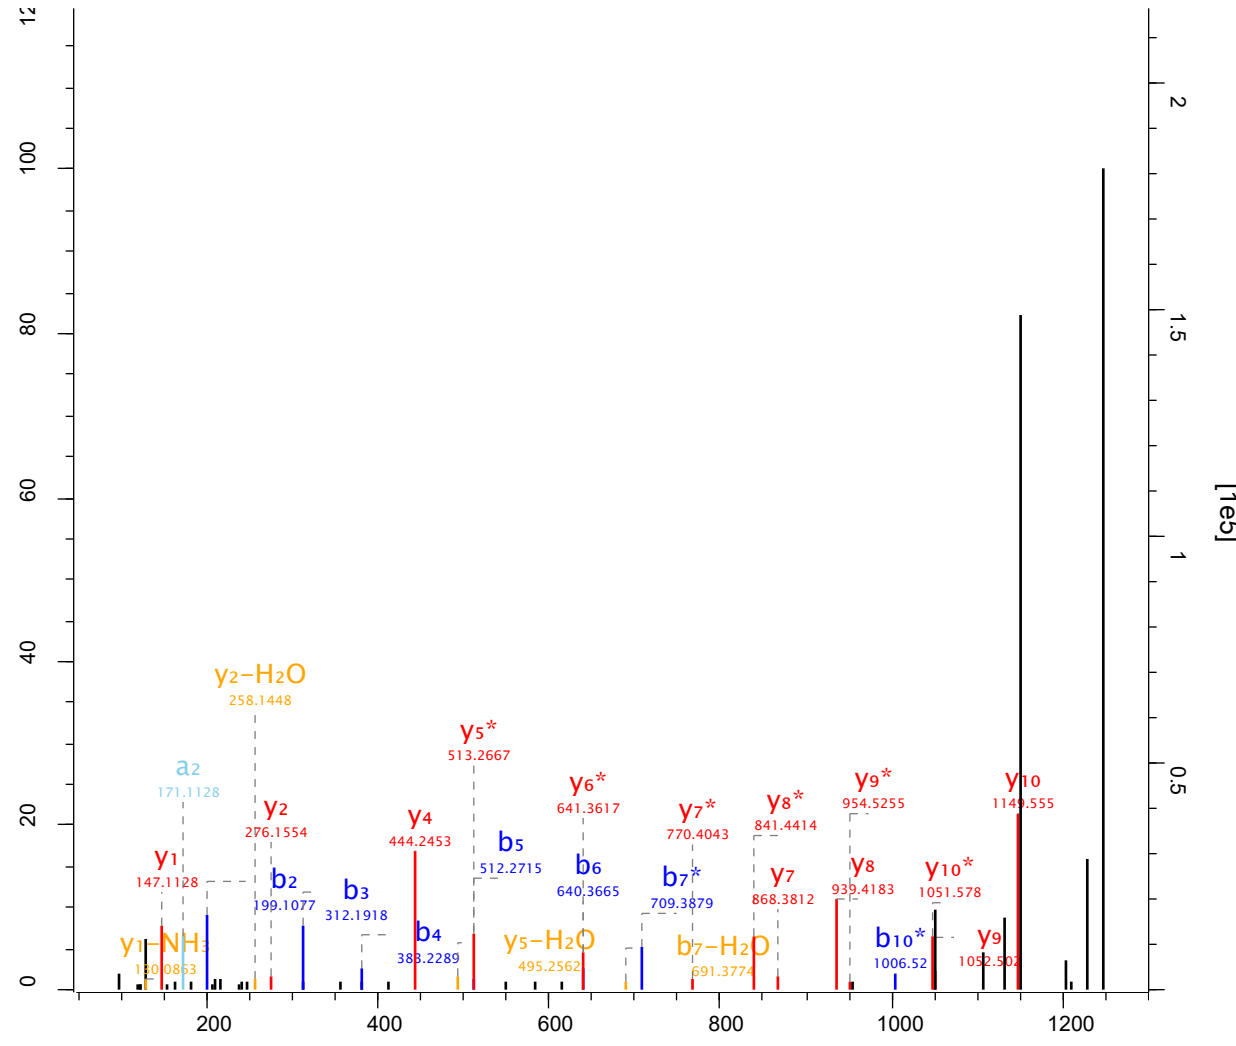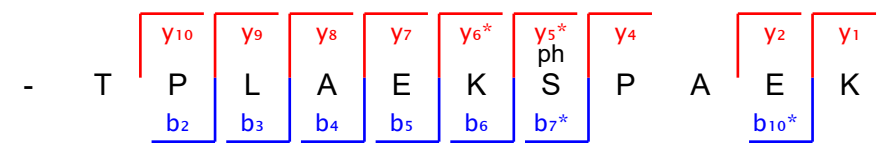

Raw file Scan Method Score m/z  
 sys\_02\_2 26009 FTMS; HCD 55.26 550.77

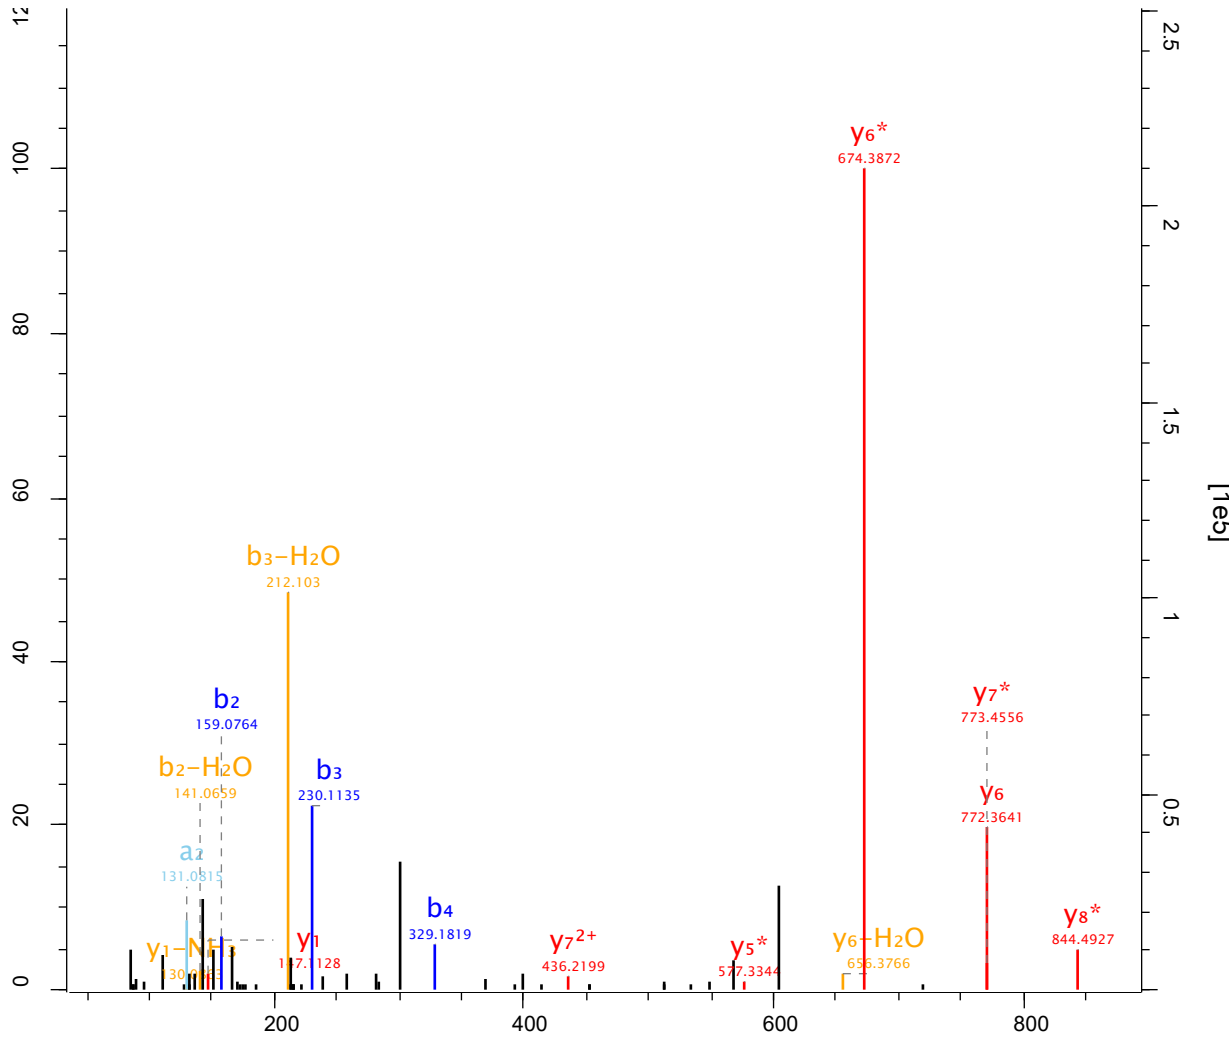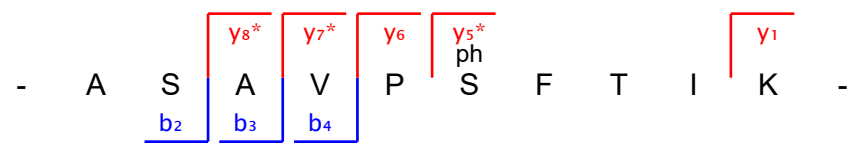

| Raw file | Scan | Method    | Score | m/z    |
|----------|------|-----------|-------|--------|
| sys_02_2 | 2624 | FTMS; HCD | 43.9  | 399.17 |

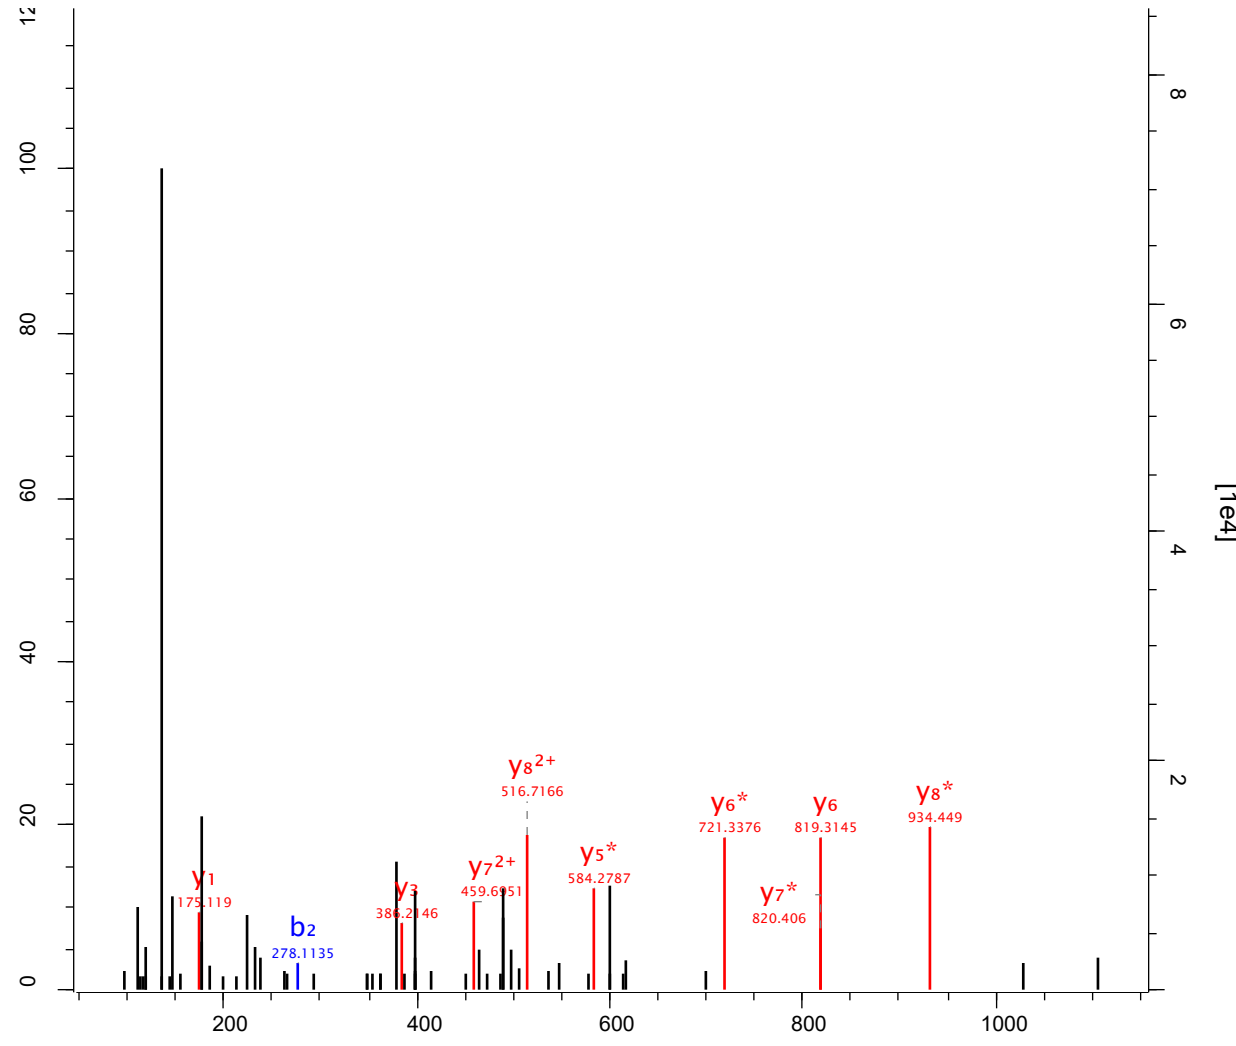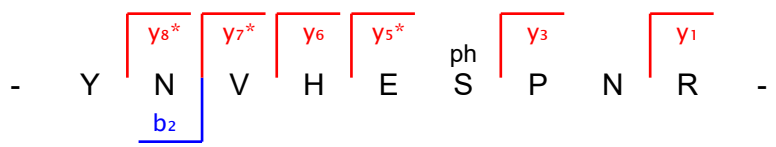

Raw file Scan Method Score m/z  
 sys\_02\_2 26446 FTMS; HCD 188.15 590.75

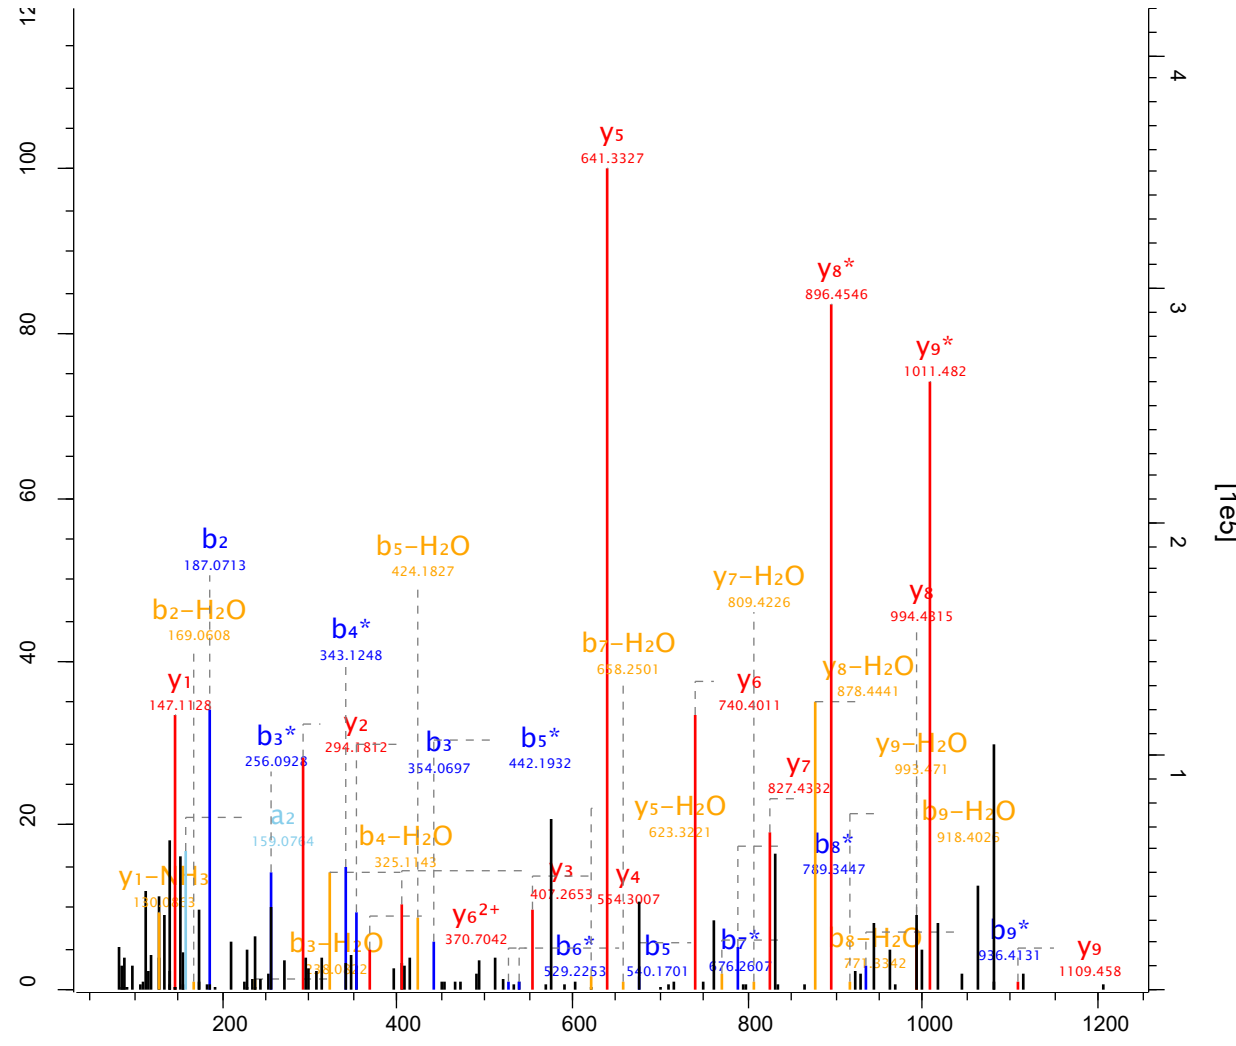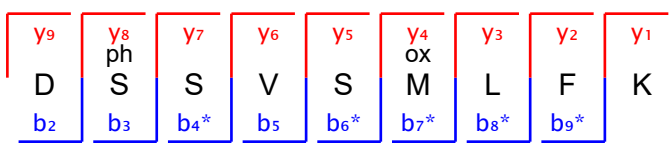

Raw file Scan Method Score m/z  
 sys\_02\_2 2645 FTMS; HCD 66.27 395.86

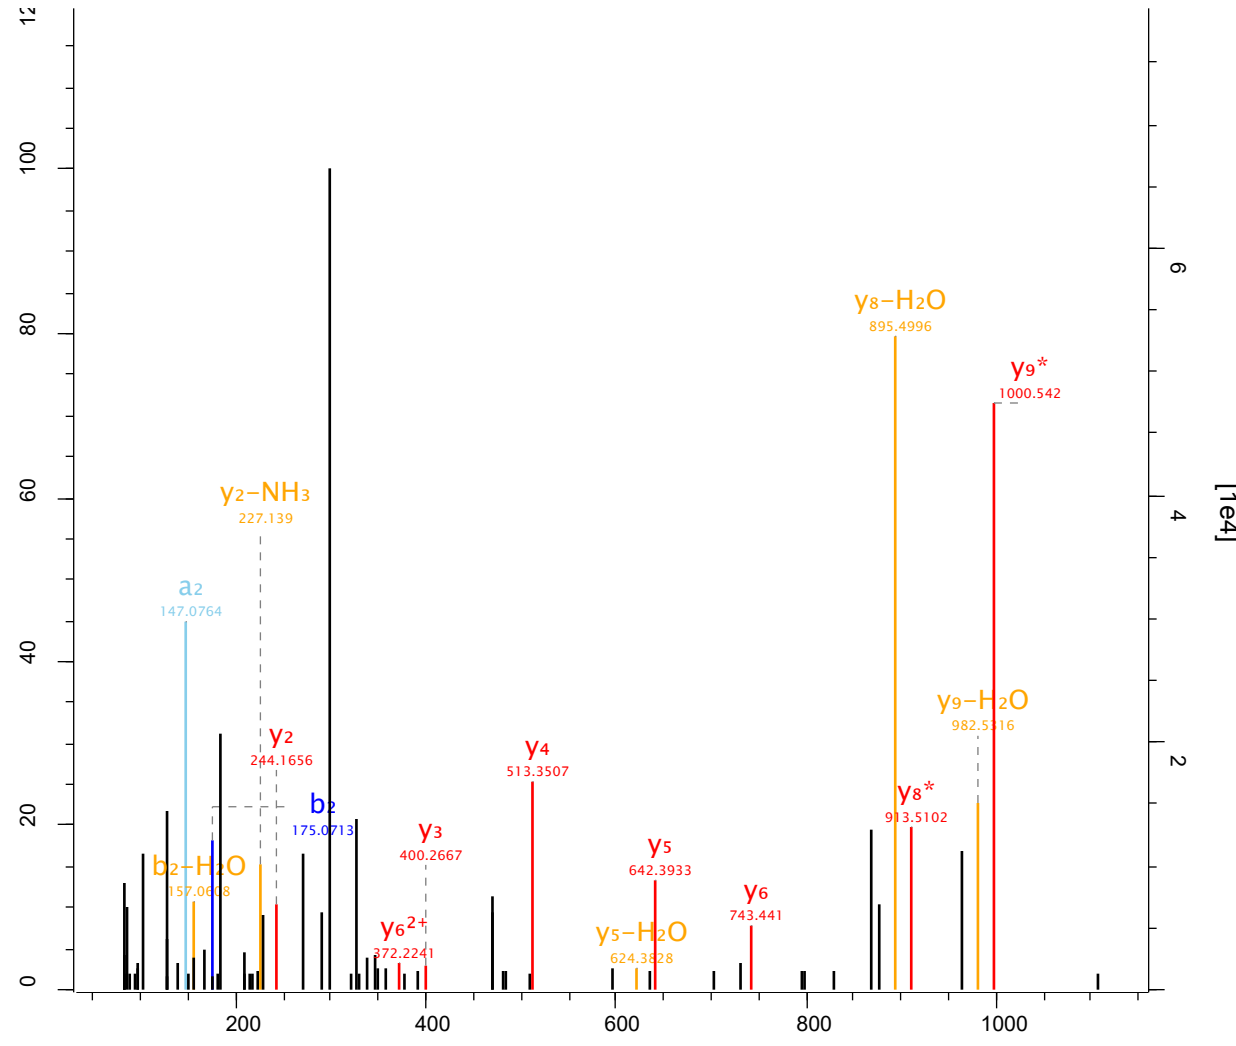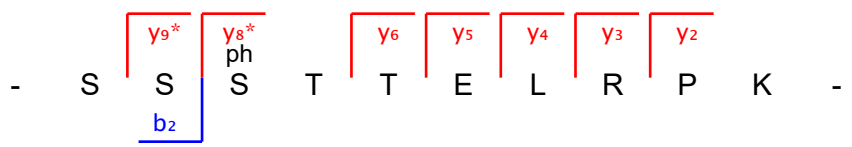



Raw file Scan Method Score m/z  
 sys\_02\_2 26563 FTMS; HCD 95.12 722.96

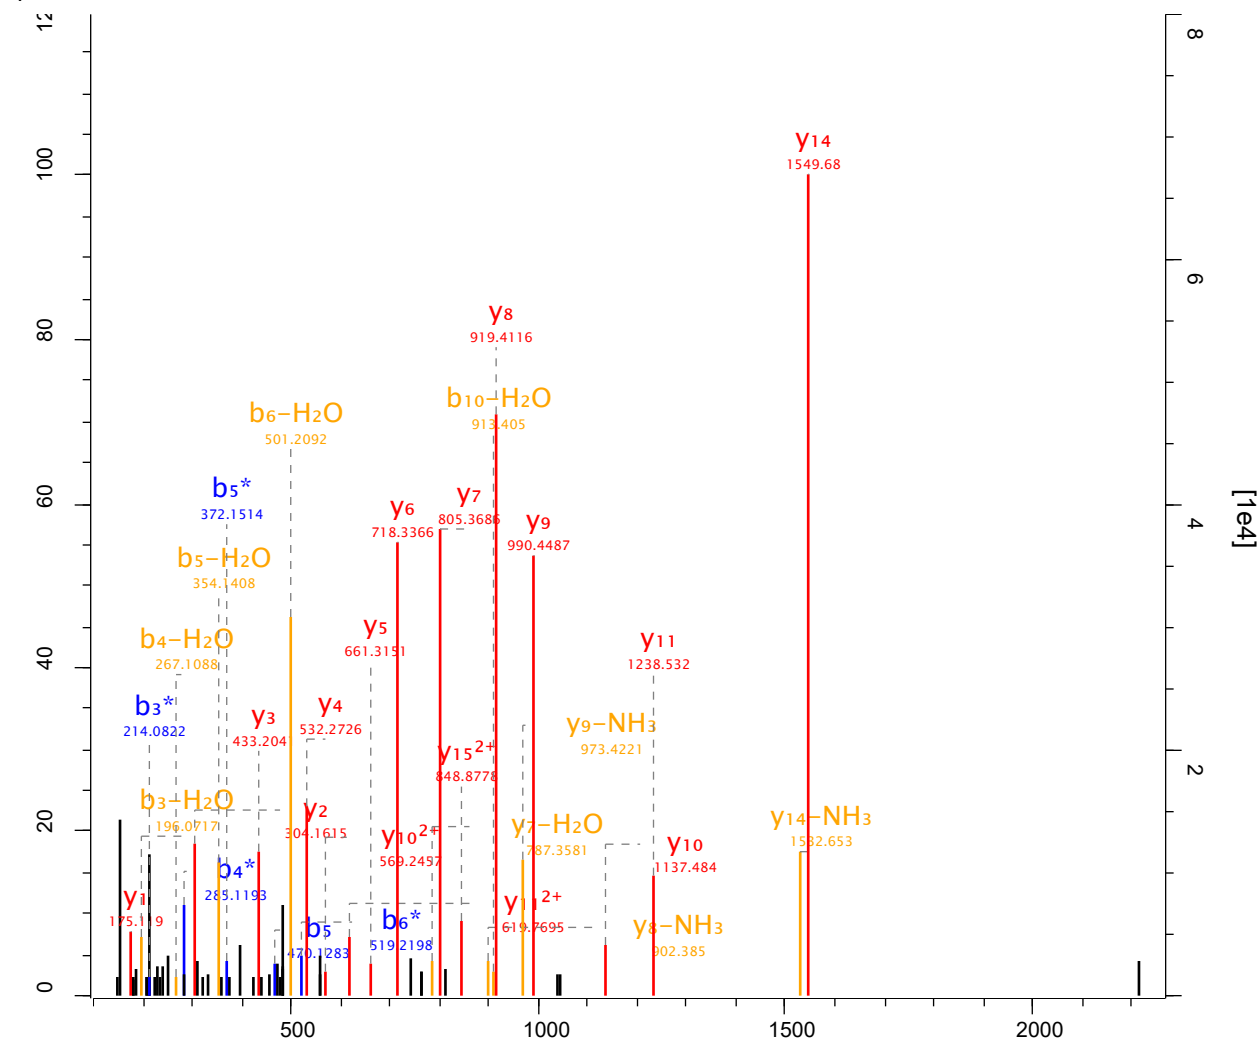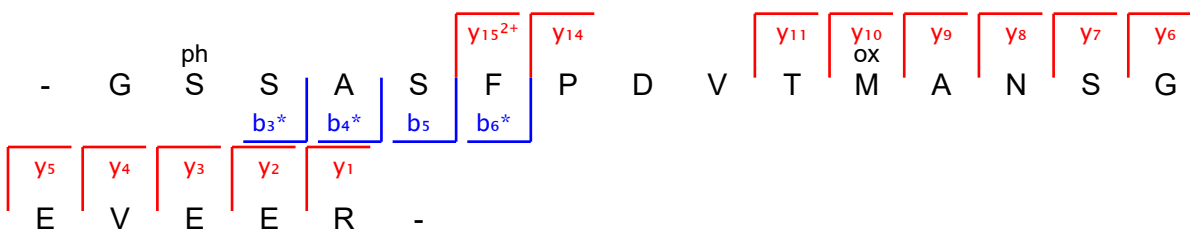

Raw file Scan Method Score m/z  
 sys\_02\_2 27519 FTMS; HCD 42.07 811.39

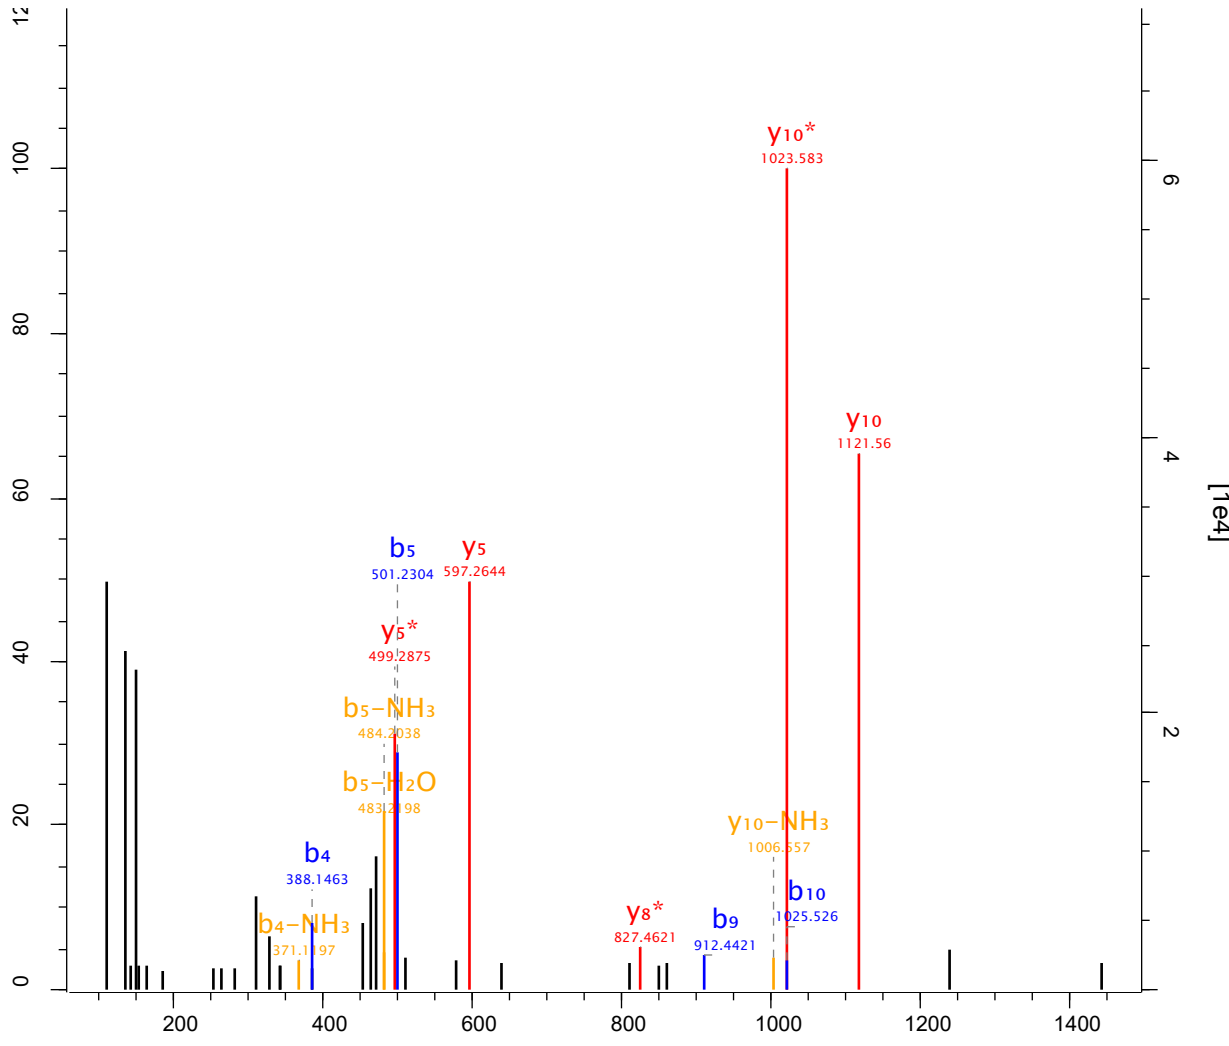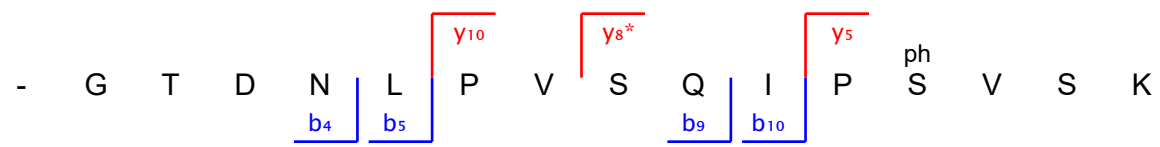

Raw file Scan Method Score m/z  
 sys\_02\_2 27621 FTMS; HCD 61.13 741.32

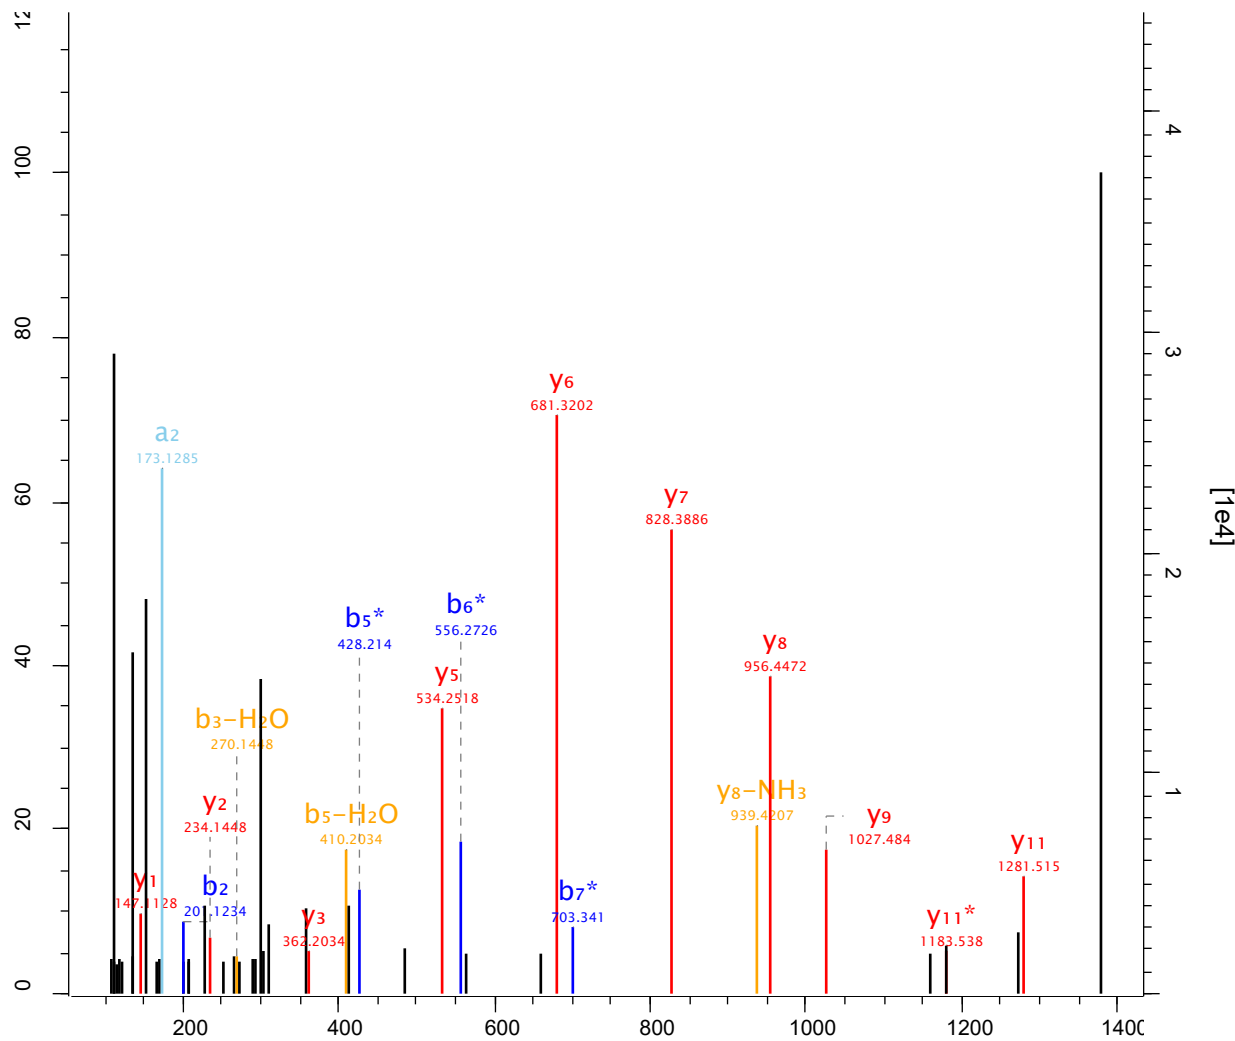

- S I S ph S A Q F F G D Q S K -

b<sub>2</sub>
y<sub>11</sub>
b<sub>5</sub><sup>\*</sup>
y<sub>9</sub>
b<sub>6</sub><sup>\*</sup>
y<sub>8</sub>
b<sub>7</sub><sup>\*</sup>
y<sub>7</sub>
y<sub>6</sub>
y<sub>5</sub>
y<sub>3</sub>
y<sub>2</sub>
y<sub>1</sub>

| Raw file | Scan | Method    | Score | m/z    |
|----------|------|-----------|-------|--------|
| sys_02_2 | 2792 | FTMS; HCD | 75.97 | 517.87 |

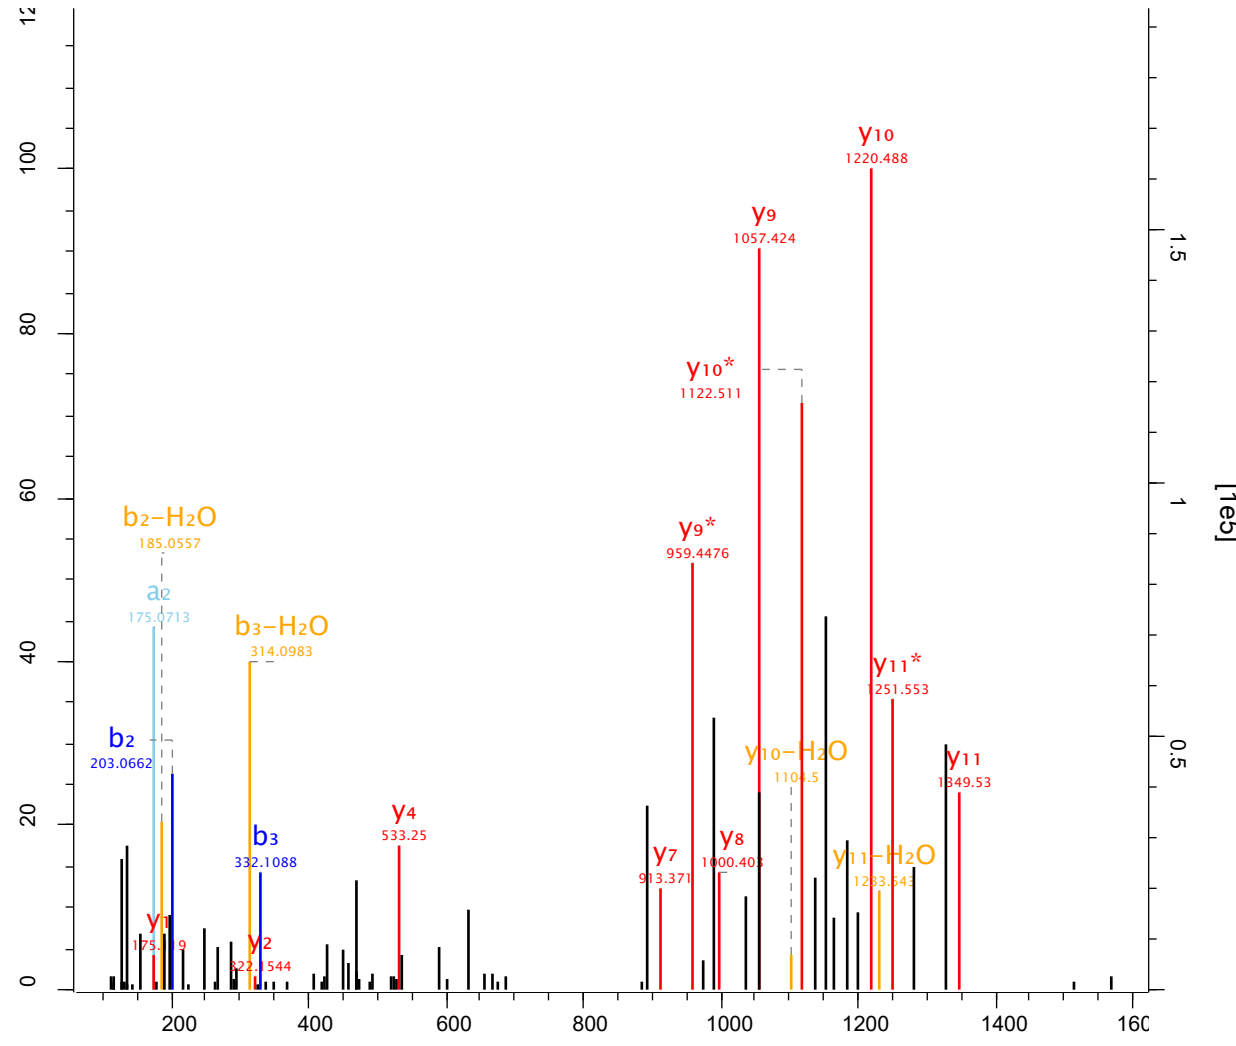

- D S E Y G S G R S P N M R -

b<sub>2</sub>
b<sub>3</sub>
y<sub>11</sub>
y<sub>10</sub>
y<sub>9</sub>
y<sub>8</sub>
y<sub>7</sub>
y<sub>4</sub>
y<sub>2</sub>OX
y<sub>1</sub>

| Raw file | Scan | Method    | Score | m/z    |
|----------|------|-----------|-------|--------|
| sys_02_2 | 2798 | FTMS; HCD | 70.44 | 588.79 |

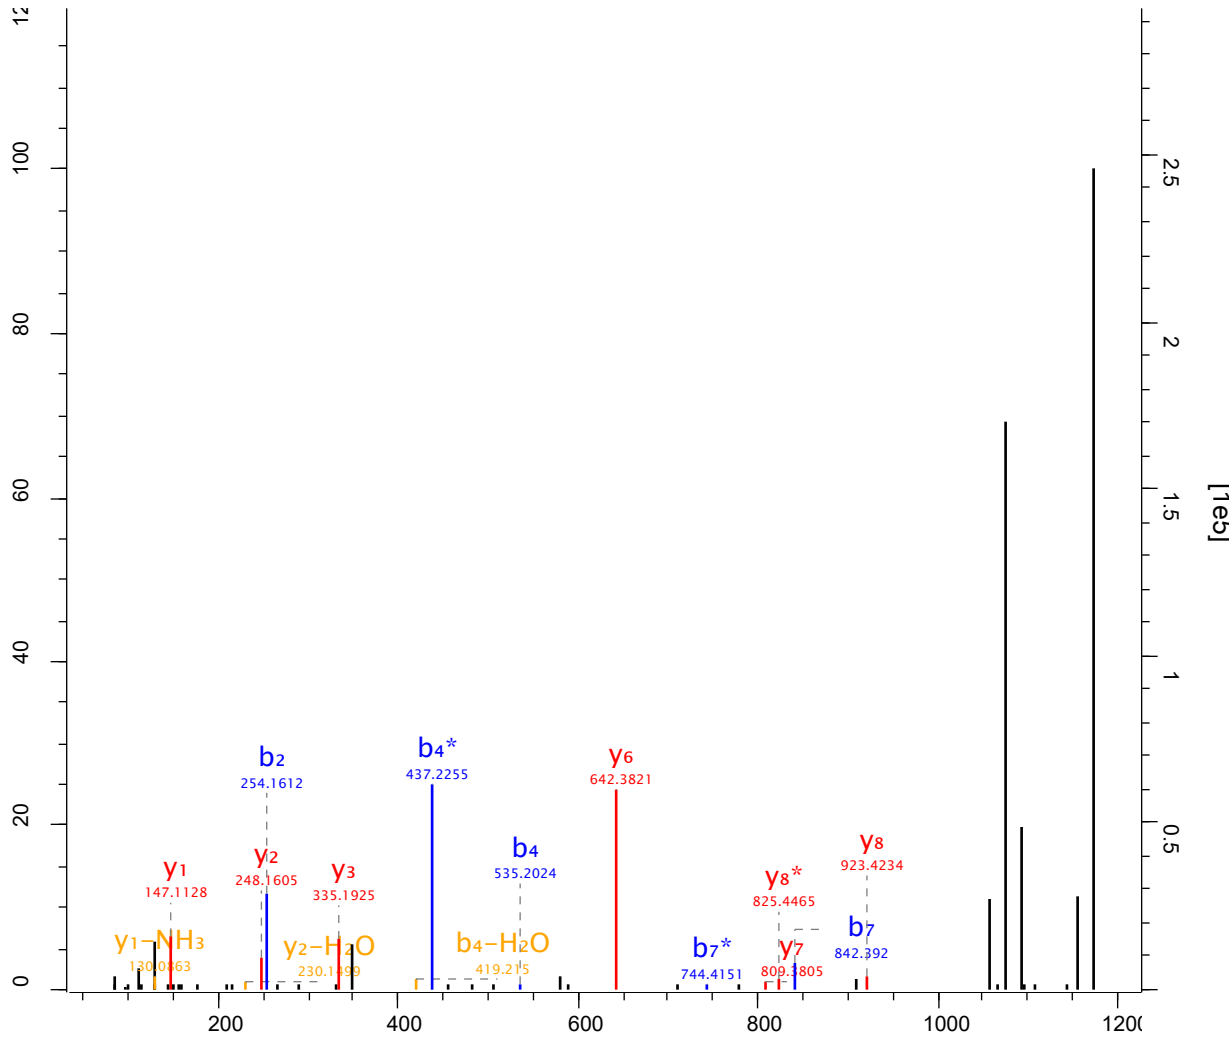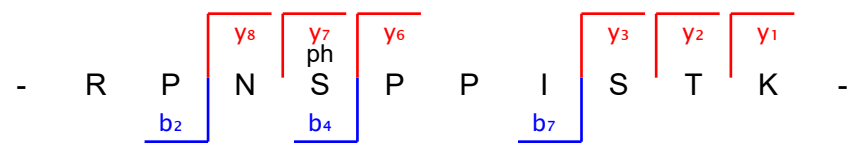

| Raw file | Scan | Method    | Score  | m/z   |
|----------|------|-----------|--------|-------|
| sys_02_2 | 2803 | FTMS; HCD | 116.51 | 670.3 |

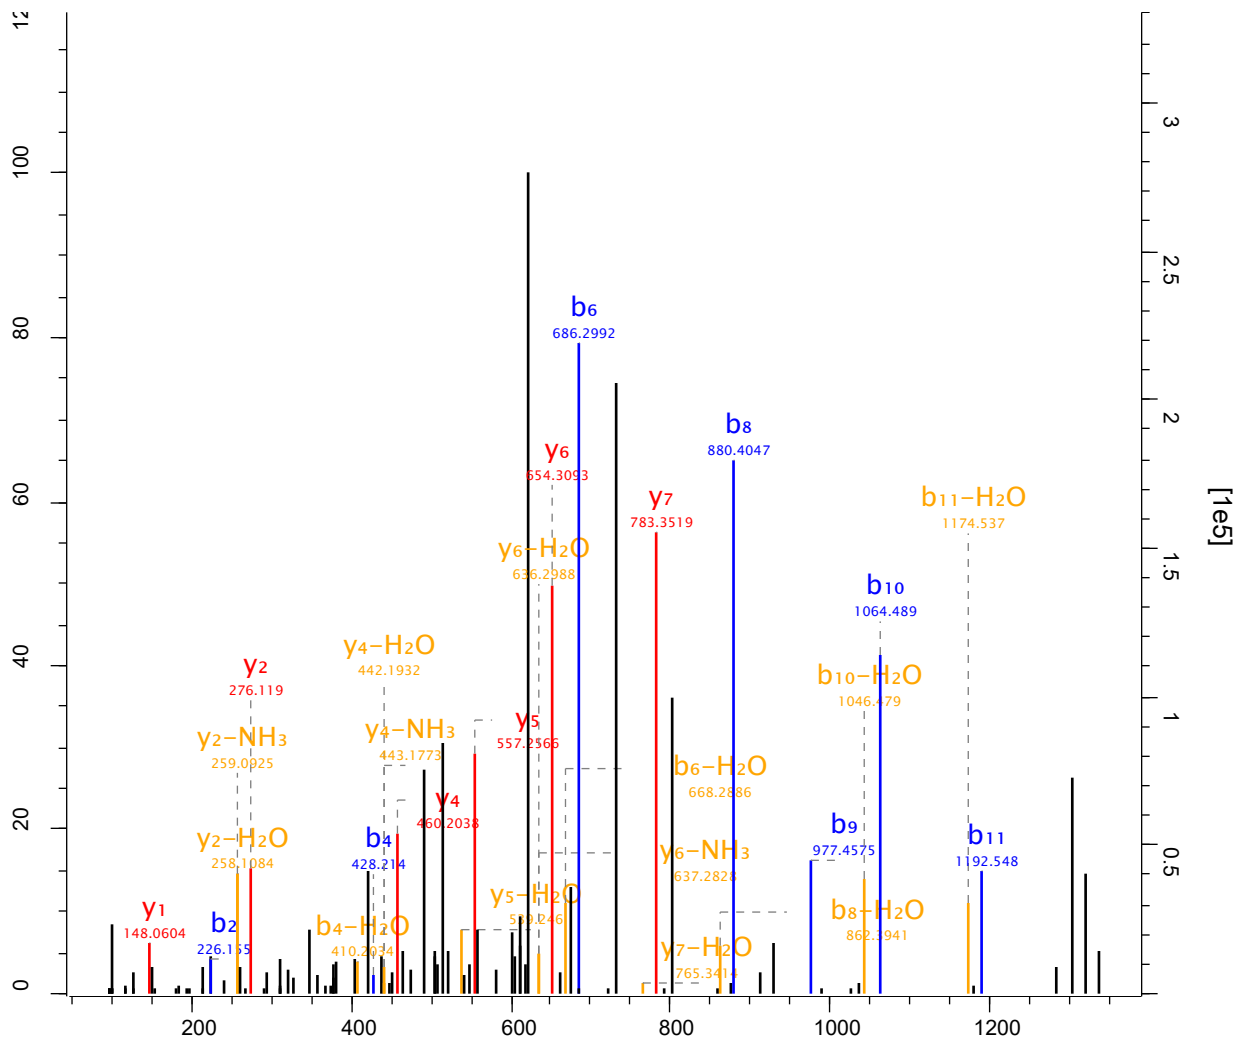

- K P S D E E P P S Q E -

b<sub>2</sub>
b<sub>4</sub>
b<sub>6</sub>
b<sub>8</sub>
b<sub>9</sub>
b<sub>10</sub>
b<sub>11</sub>

y<sub>7</sub>
y<sub>6</sub>
y<sub>5</sub>
y<sub>4</sub>
y<sub>2</sub>
y<sub>1</sub>

Raw file Scan Method Score m/z  
 sys\_02\_2 2844 FTMS; HCD 43.03 439.53

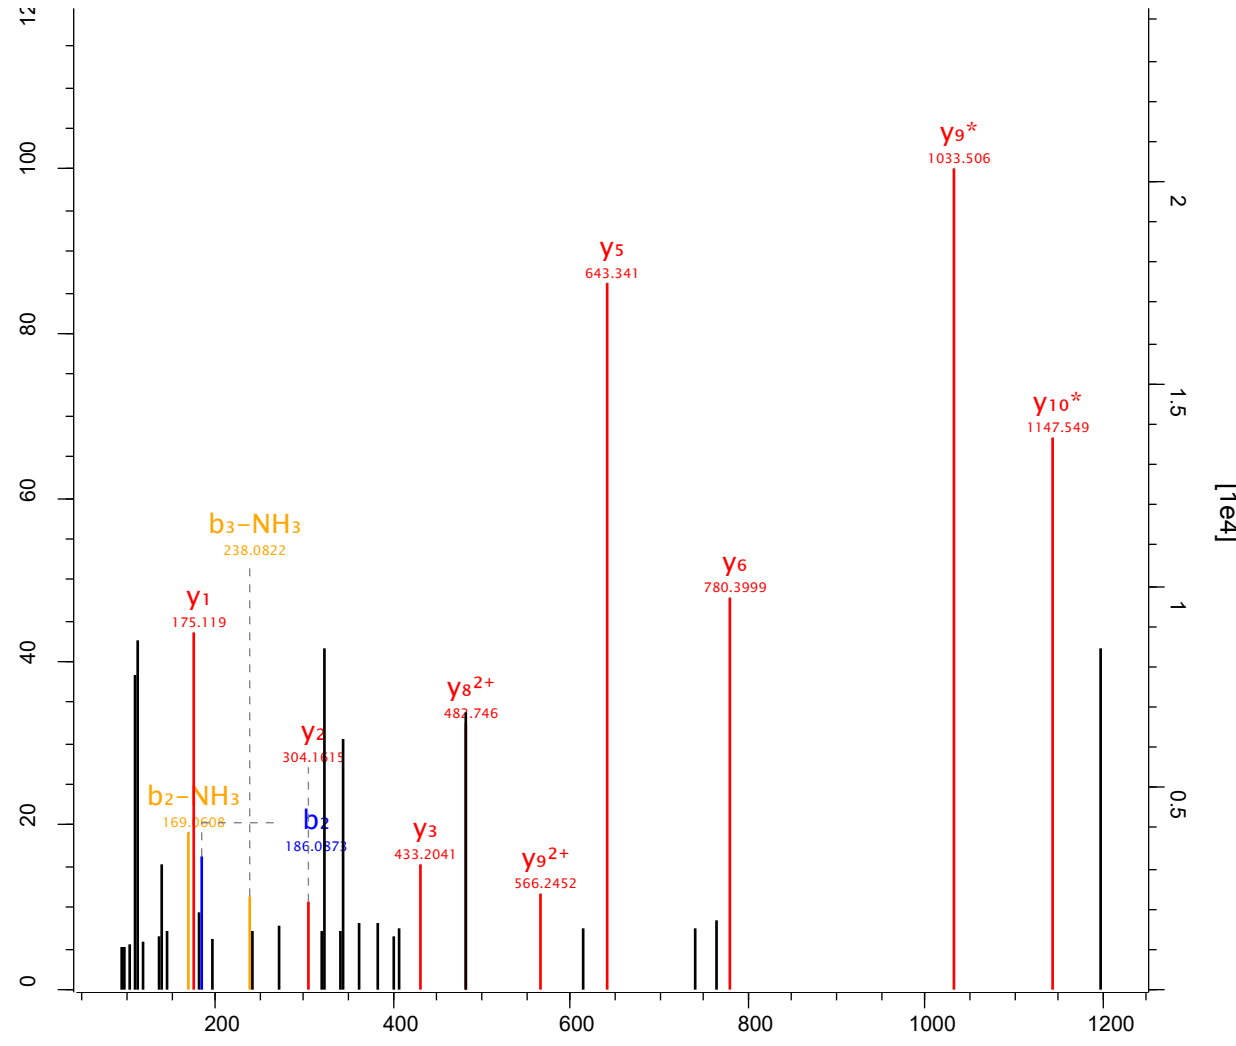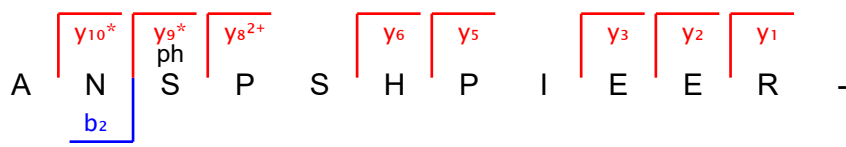

Raw file Scan Method Score m/z  
 sys\_02\_2 28733 FTMS; HCD 46.35 525.78

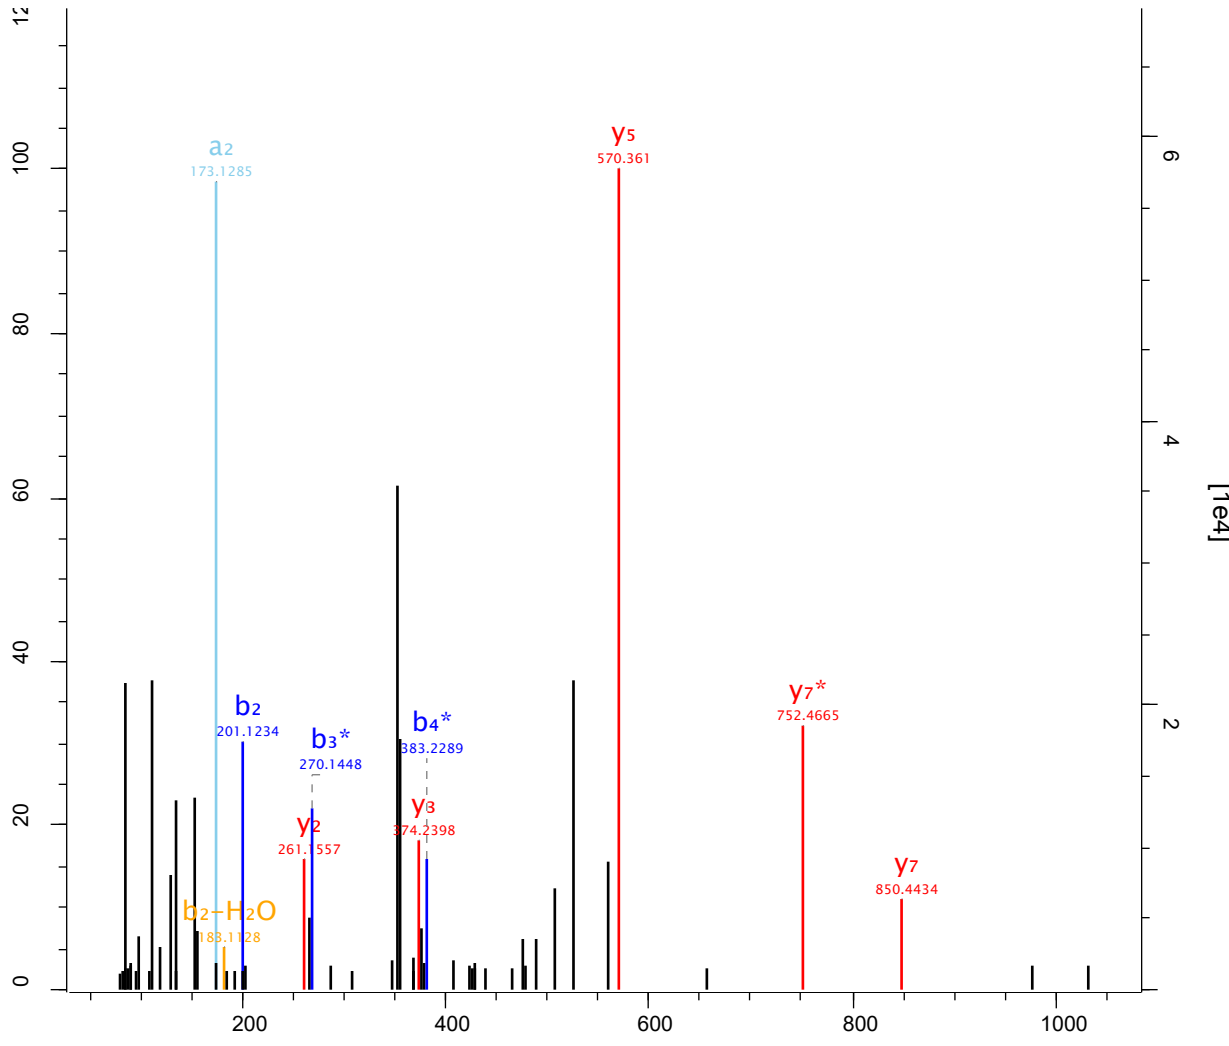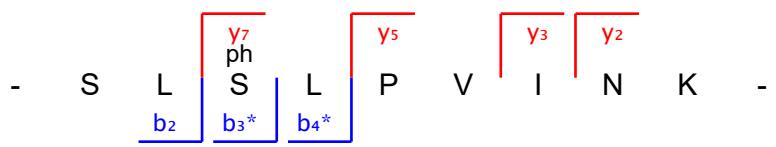



| Raw file | Scan | Method    | Score | m/z    |
|----------|------|-----------|-------|--------|
| sys_02_2 | 2886 | FTMS; HCD | 62.47 | 474.24 |

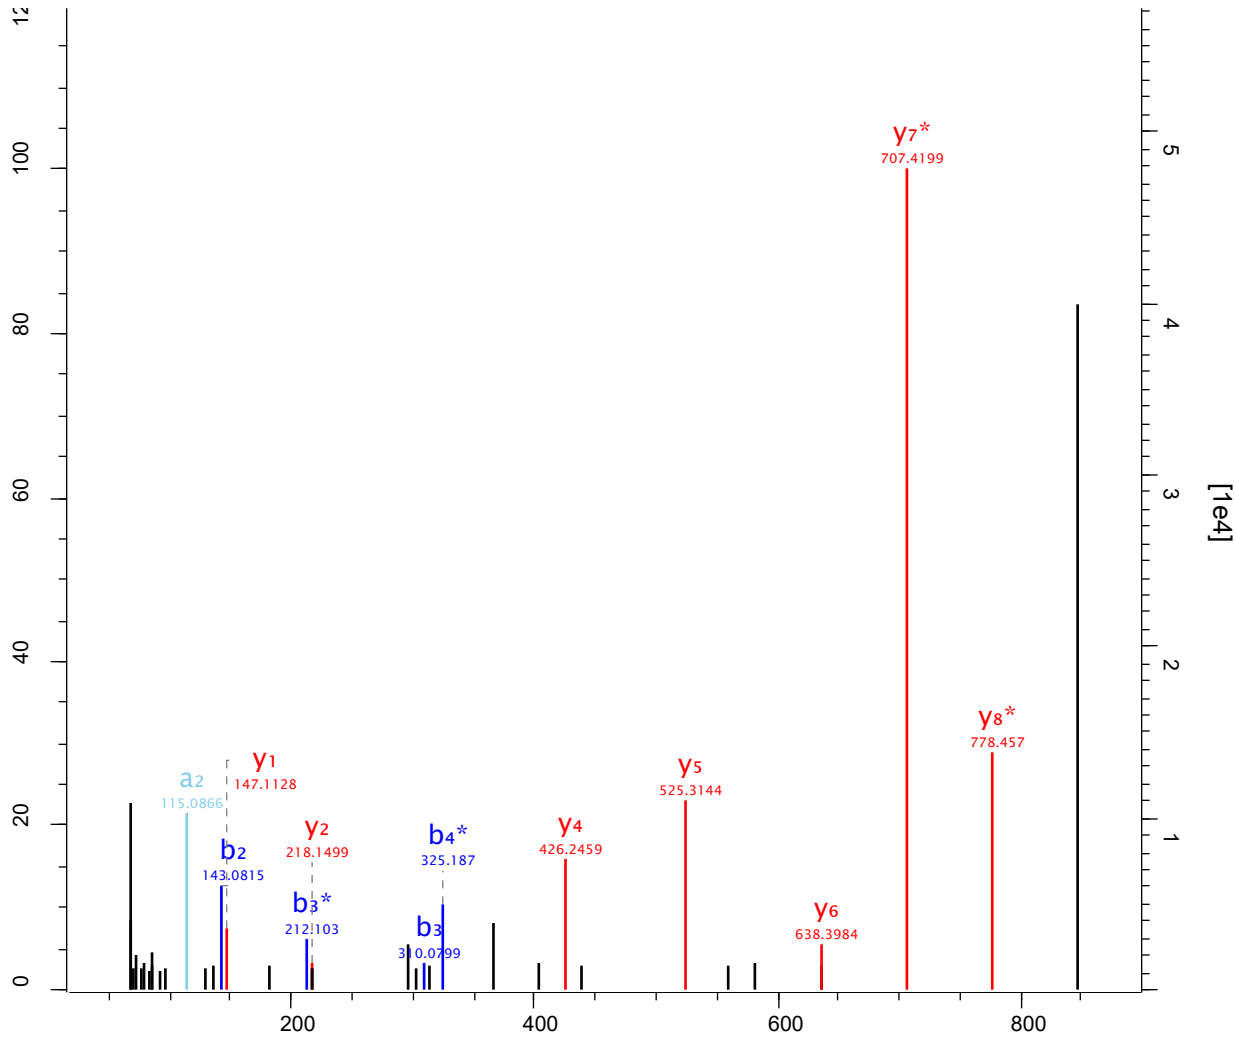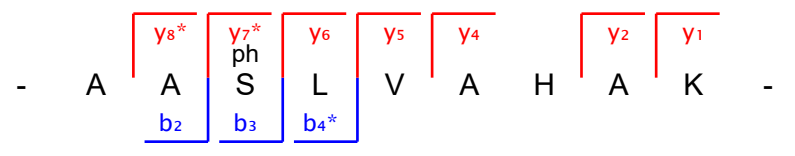

Raw file Scan Method Score m/z  
 sys\_02\_2 2949 FTMS; HCD 148.62 596.26

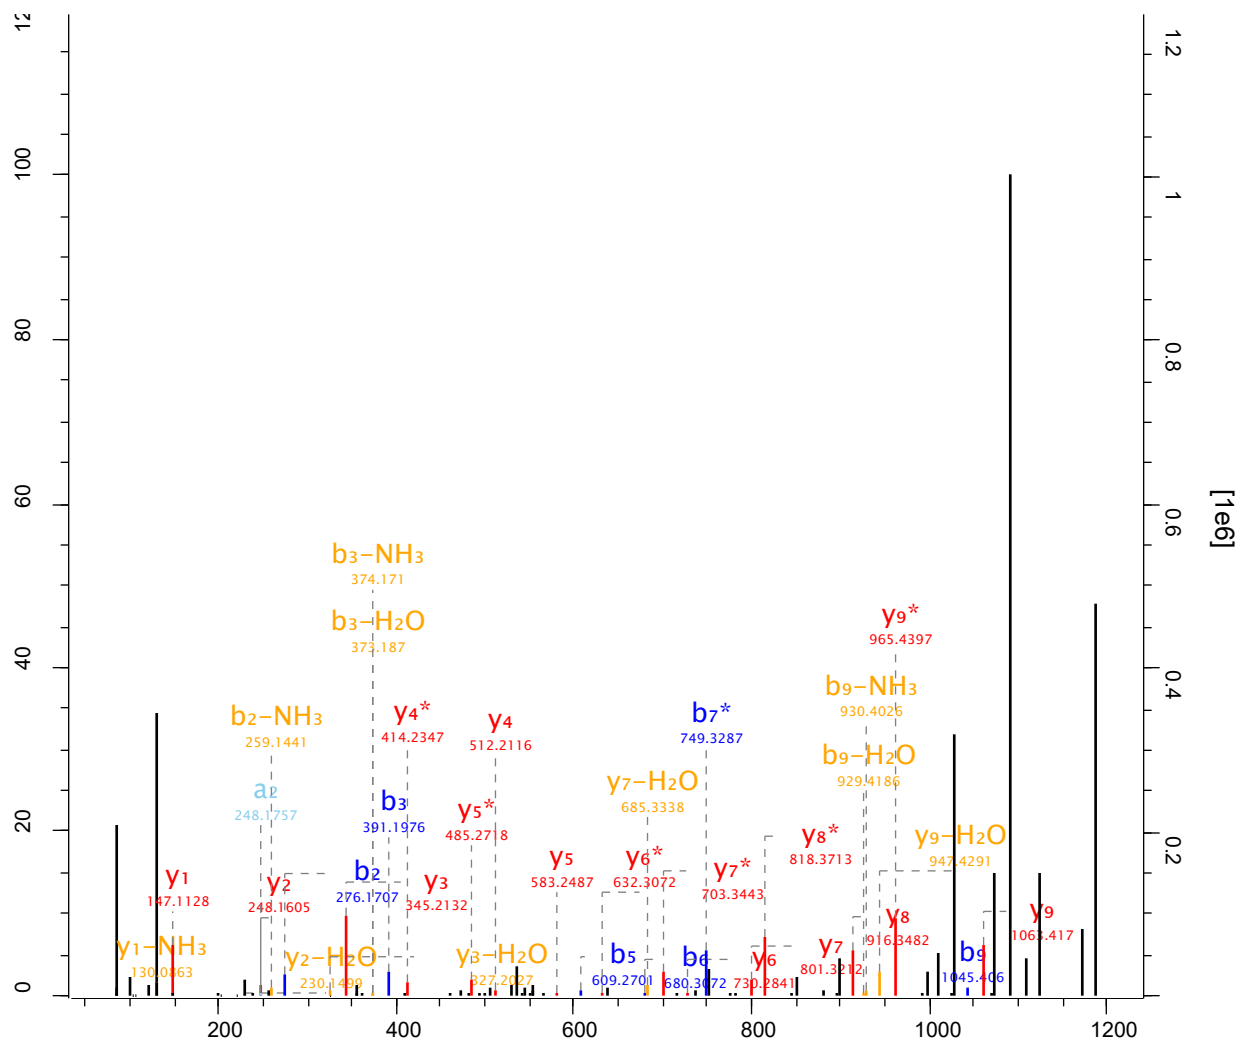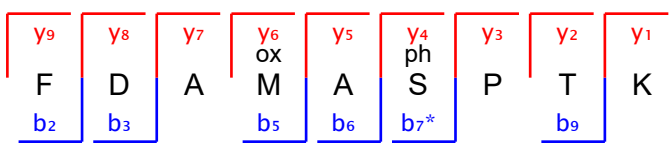

| Raw file | Scan | Method    | Score | m/z    |
|----------|------|-----------|-------|--------|
| sys_02_2 | 3026 | FTMS; HCD | 95.42 | 566.74 |

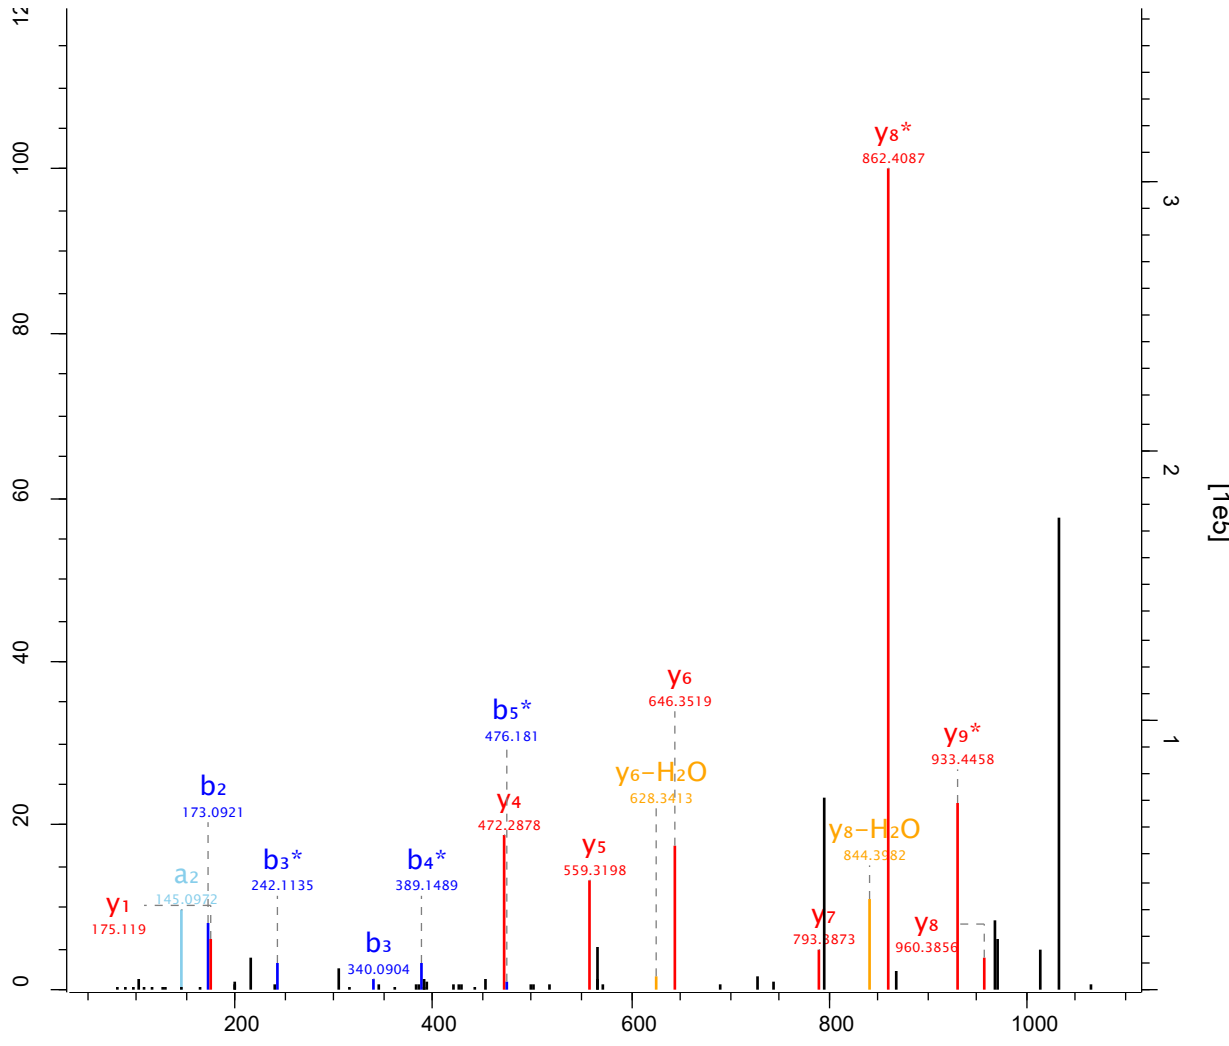

- T A S M S S P T V R -

y9\*
y8  
ph
y7  
ox
y6
y5
y4
y1

b2
b3
b4\*
b5\*

Raw file Scan Method Score m/z  
 sys\_02\_2 3061 FTMS; HCD 97.45 631.58

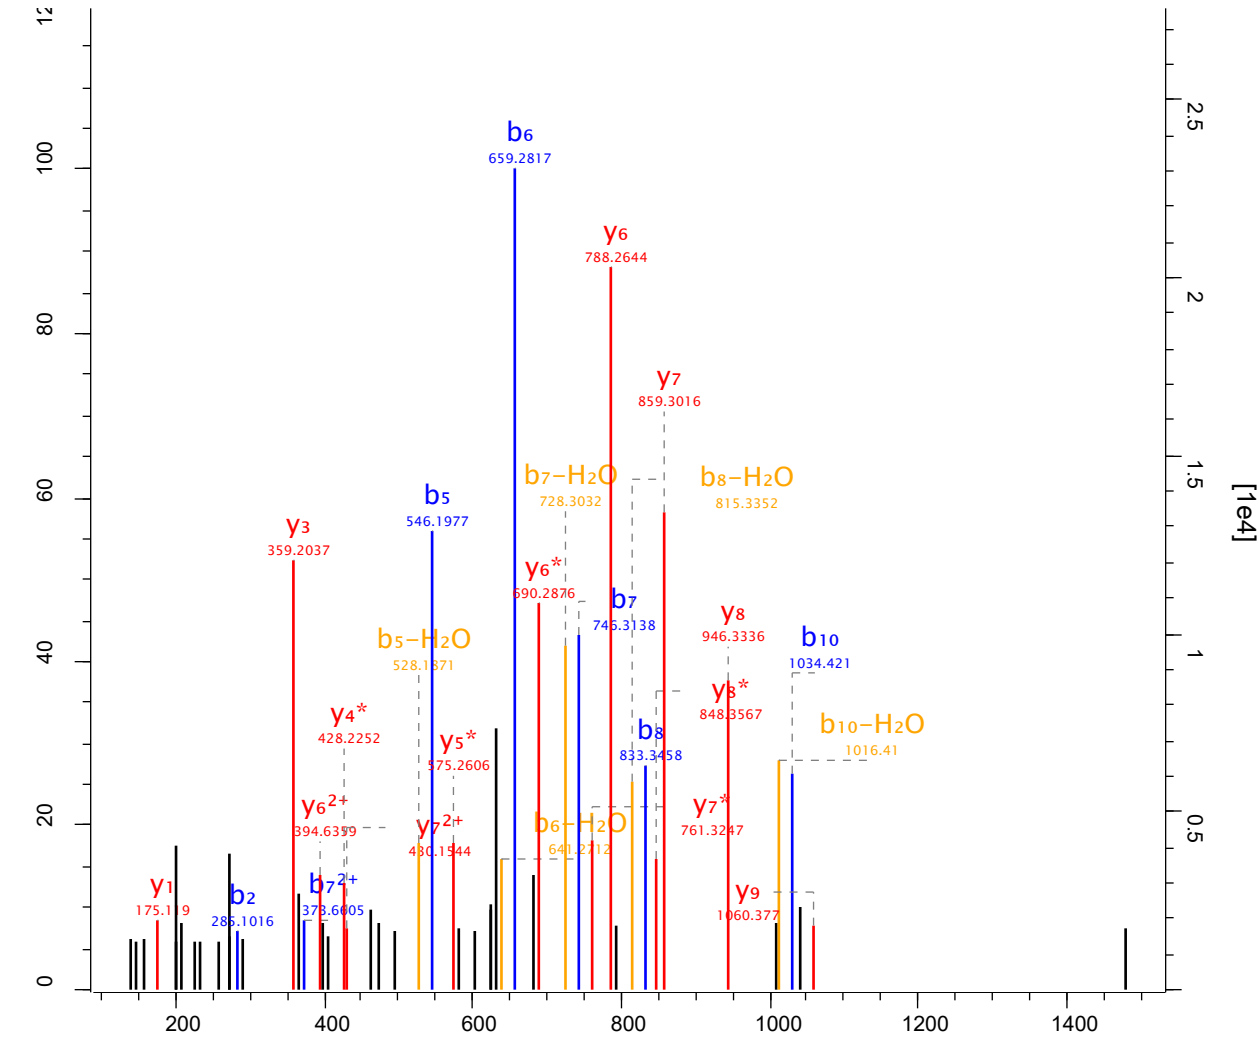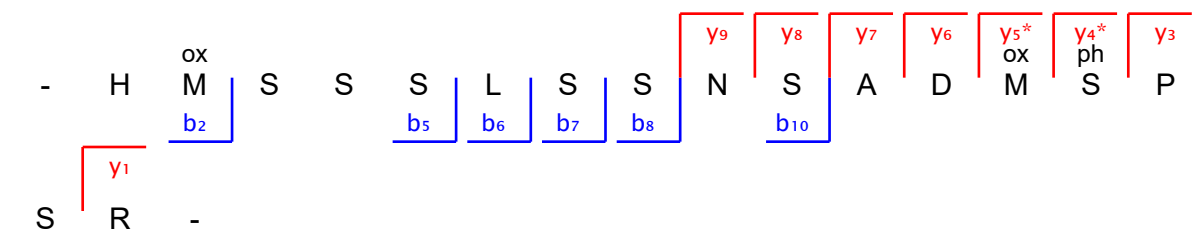

| Raw file | Scan | Method    | Score | m/z    |
|----------|------|-----------|-------|--------|
| sys_02_2 | 3115 | FTMS; HCD | 58.17 | 571.74 |

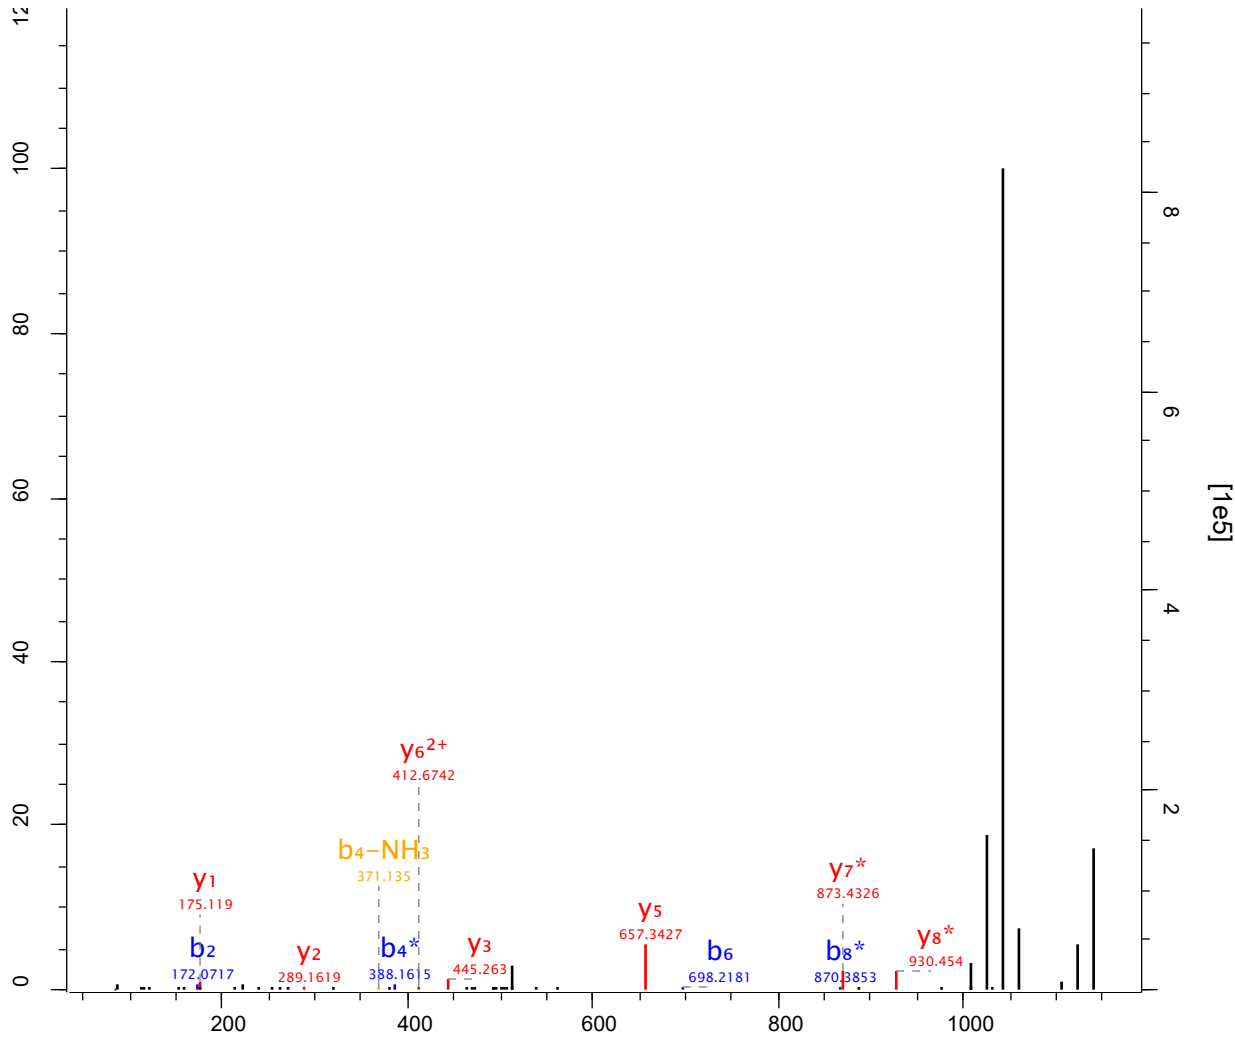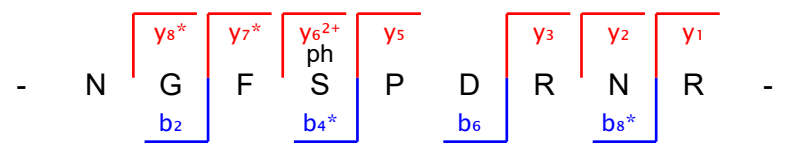

Raw file Scan Method Score m/z  
 sys\_02\_2 3227 FTMS; HCD 50.39 533.21

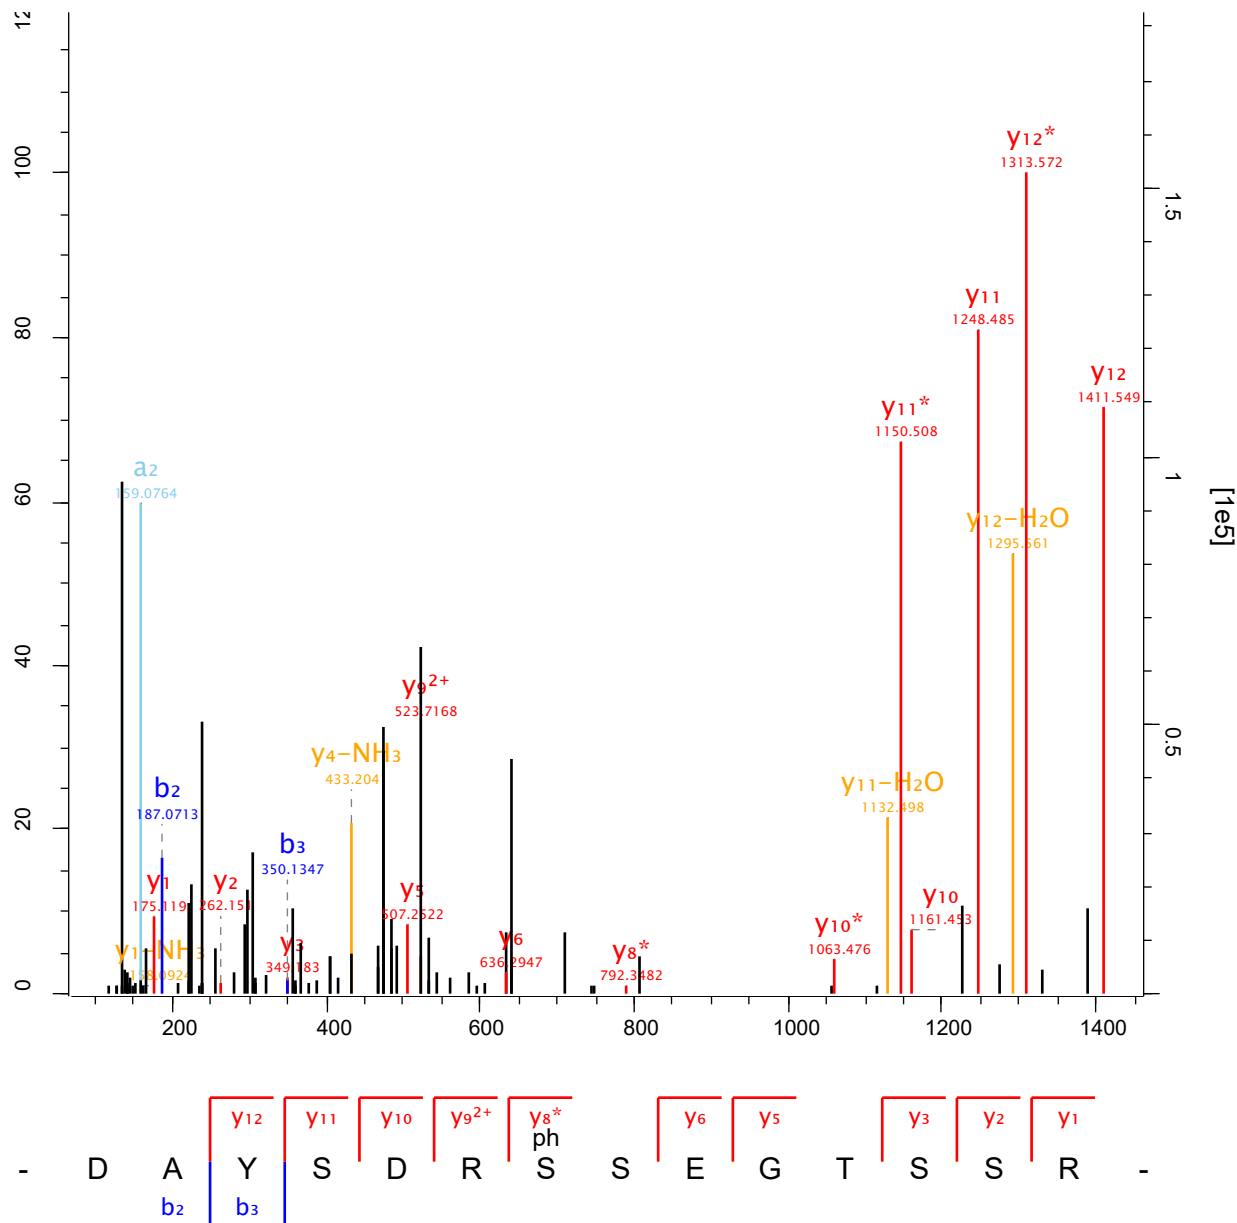

| Raw file | Scan | Method    | Score | m/z    |
|----------|------|-----------|-------|--------|
| sys_02_2 | 3258 | FTMS; HCD | 42.34 | 563.24 |

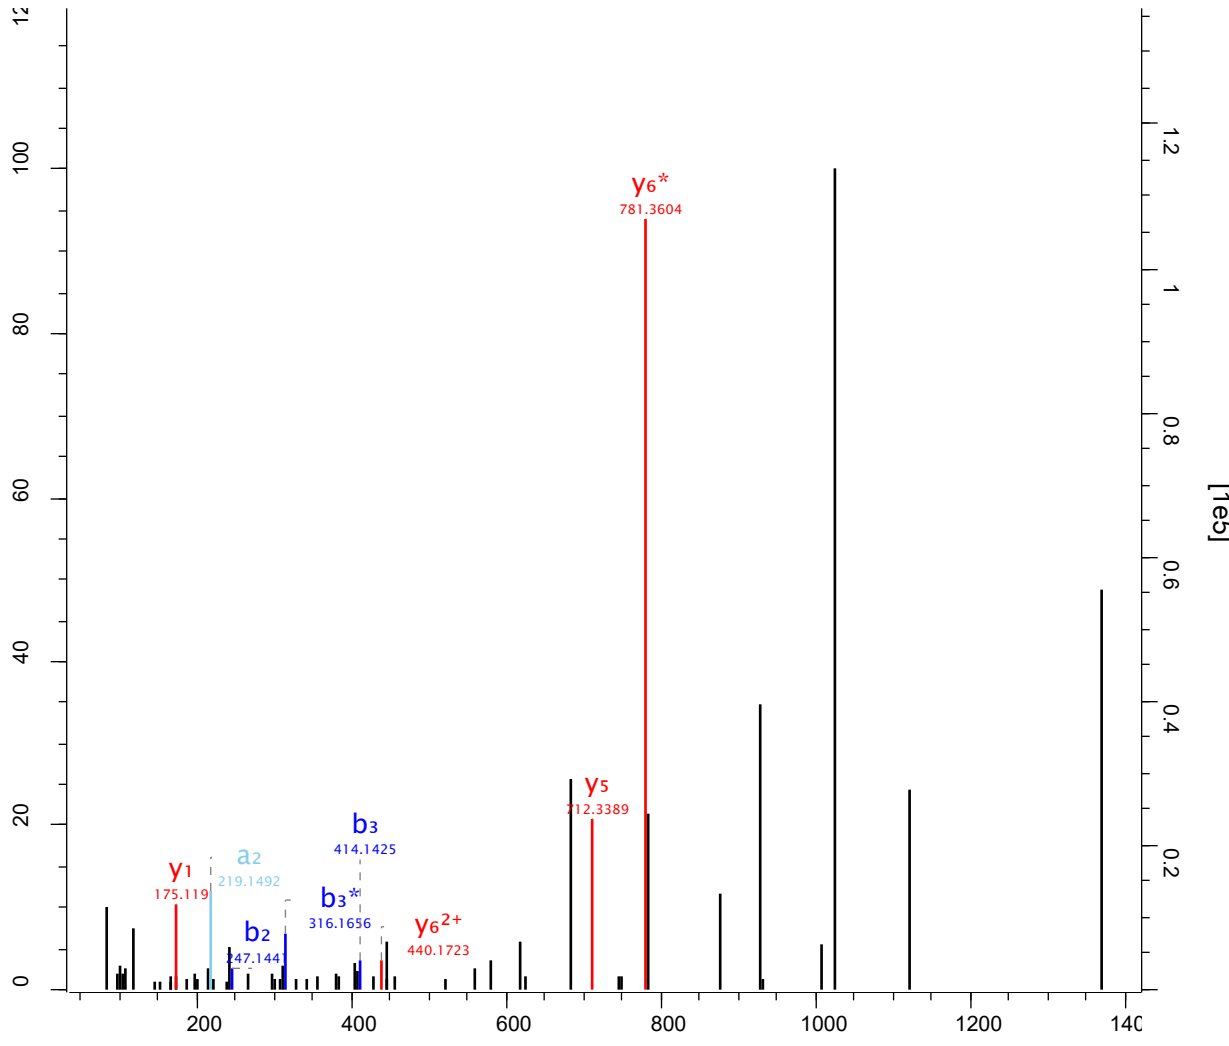

- V F S I K S E R -

Annotations:  $y_6^*$  (above S),  $y_5$  (above I),  $y_1$  (above R),  $b_2$  (below F),  $b_3$  (below S).

Raw file Scan Method Score m/z  
 sys\_02\_2 32914 FTMS; HCD 230.82 850.36

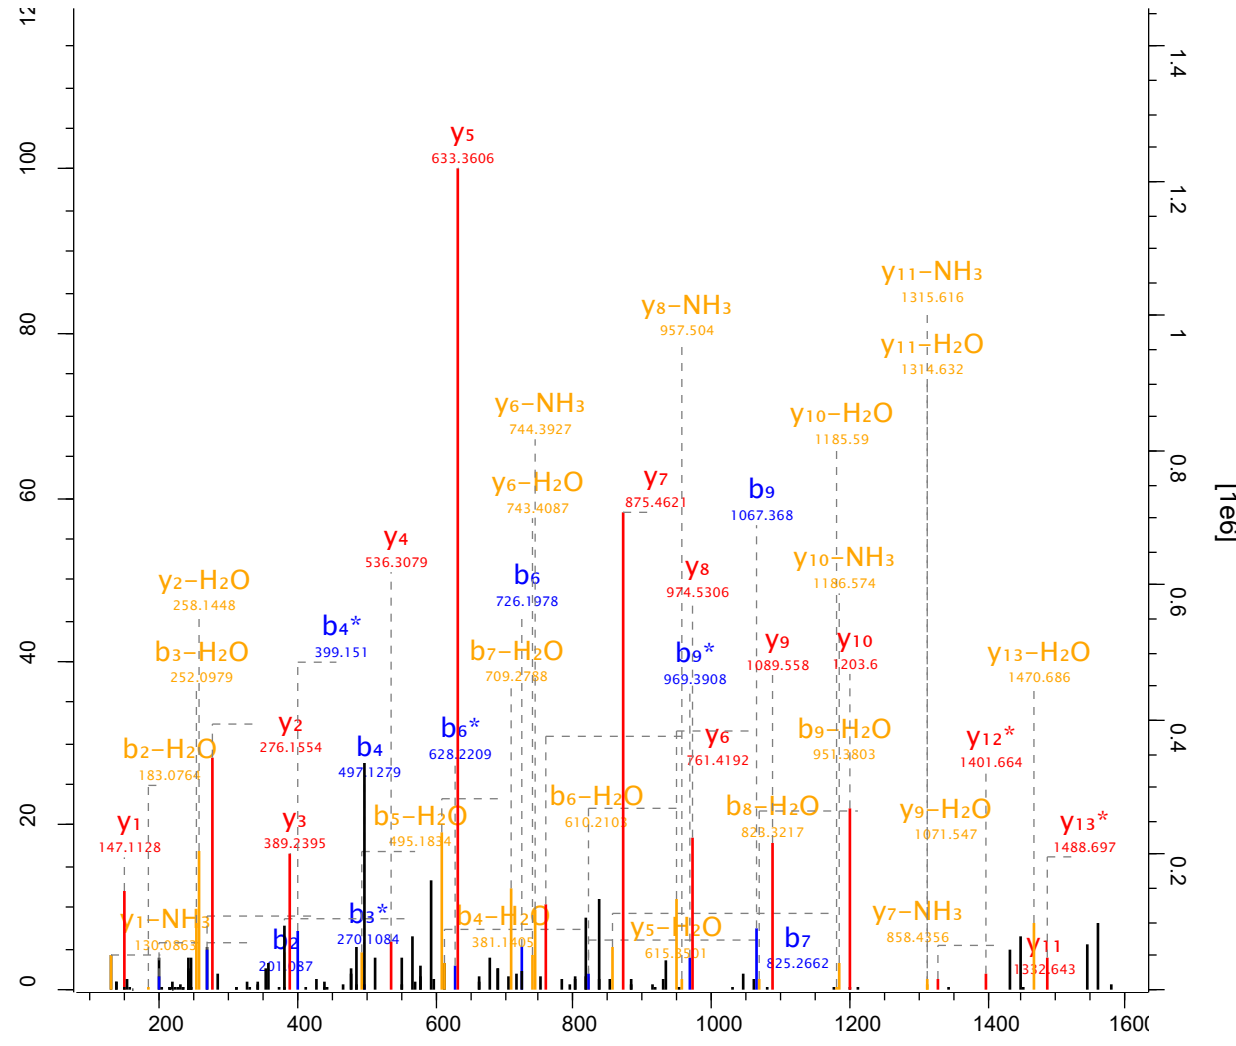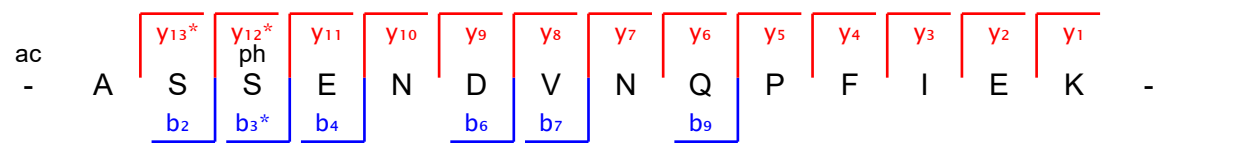



Raw file Scan Method Score m/z  
 sys\_02\_2 3307 FTMS; HCD 107.99 554.25

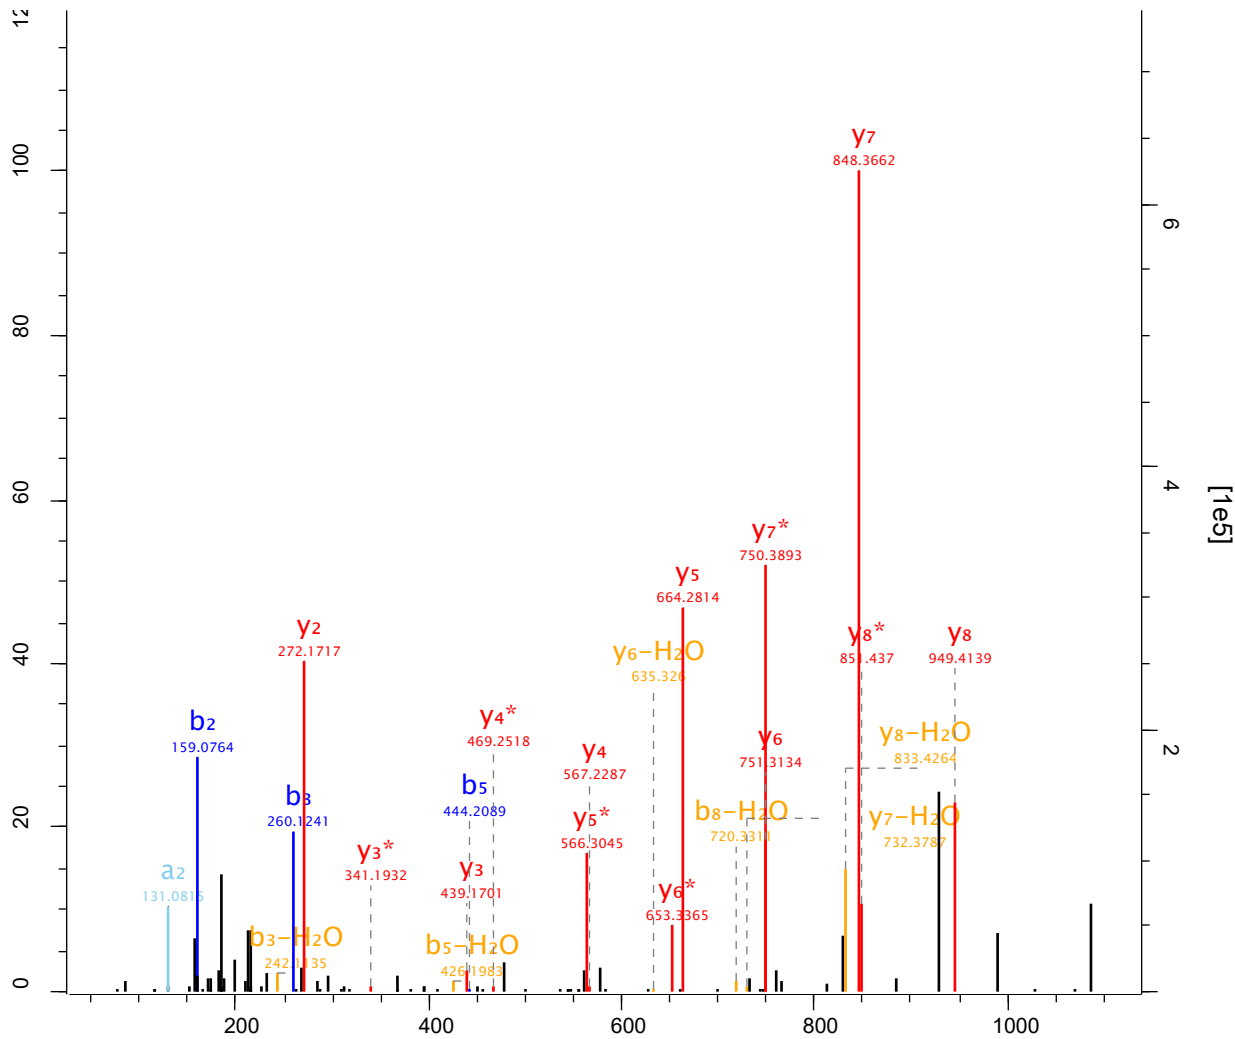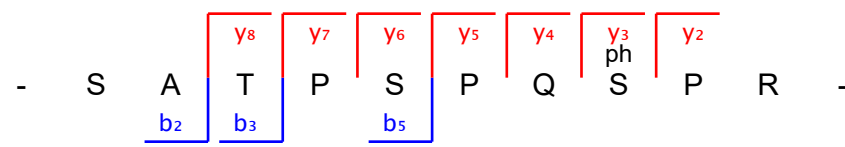

Raw file Scan Method Score m/z  
 sys\_02\_2 3320 FTMS; HCD 60.49 431.87

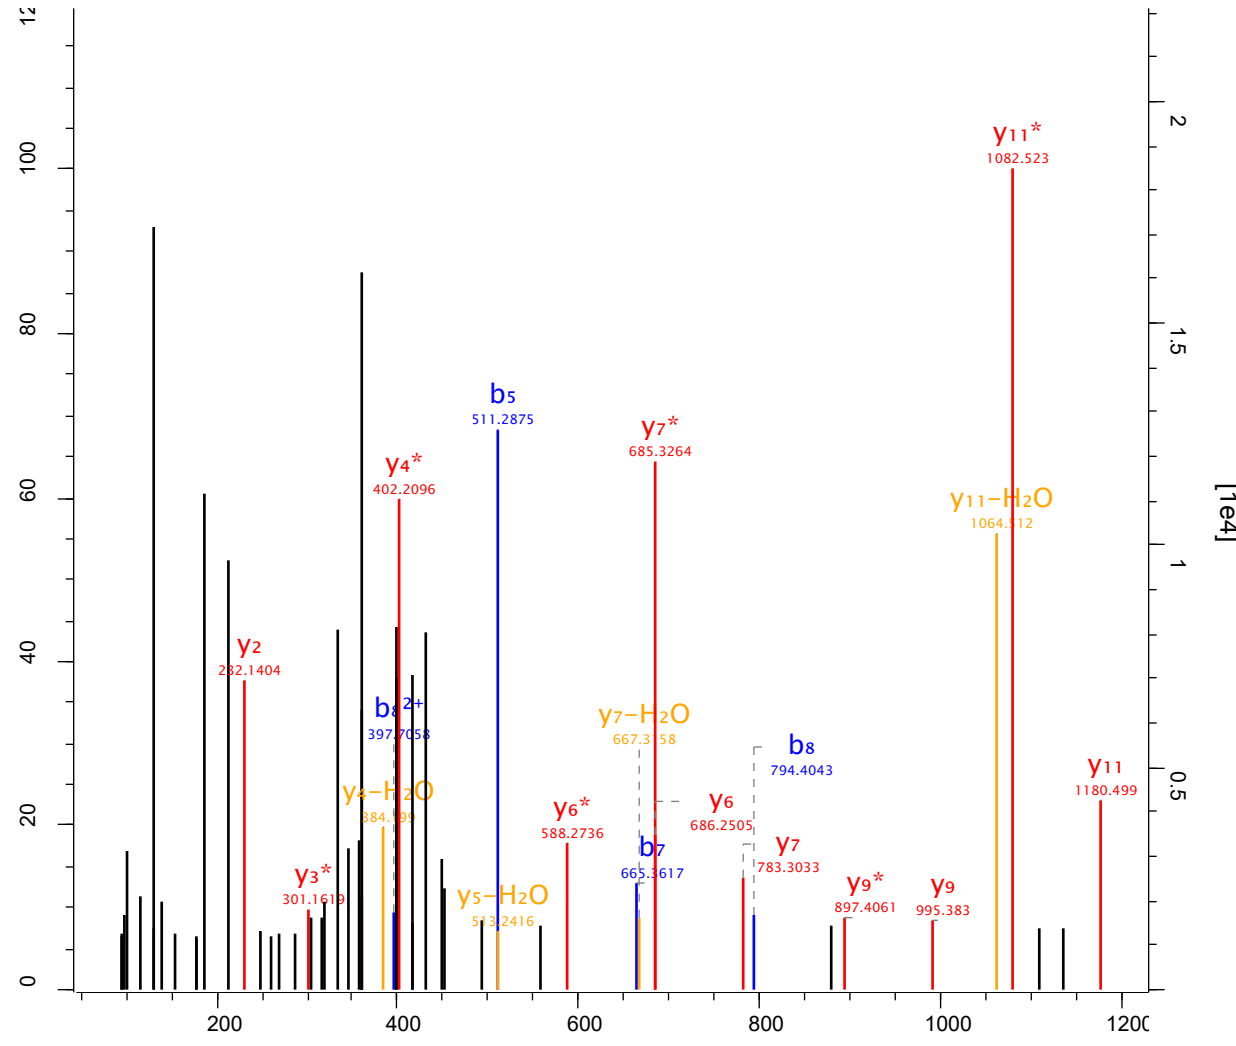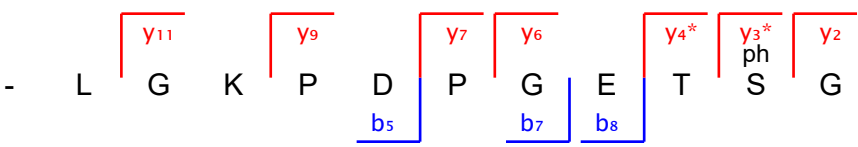

Raw file Scan Method Score m/z  
 sys\_02\_2 3426 FTMS; HCD 240.42 587.58

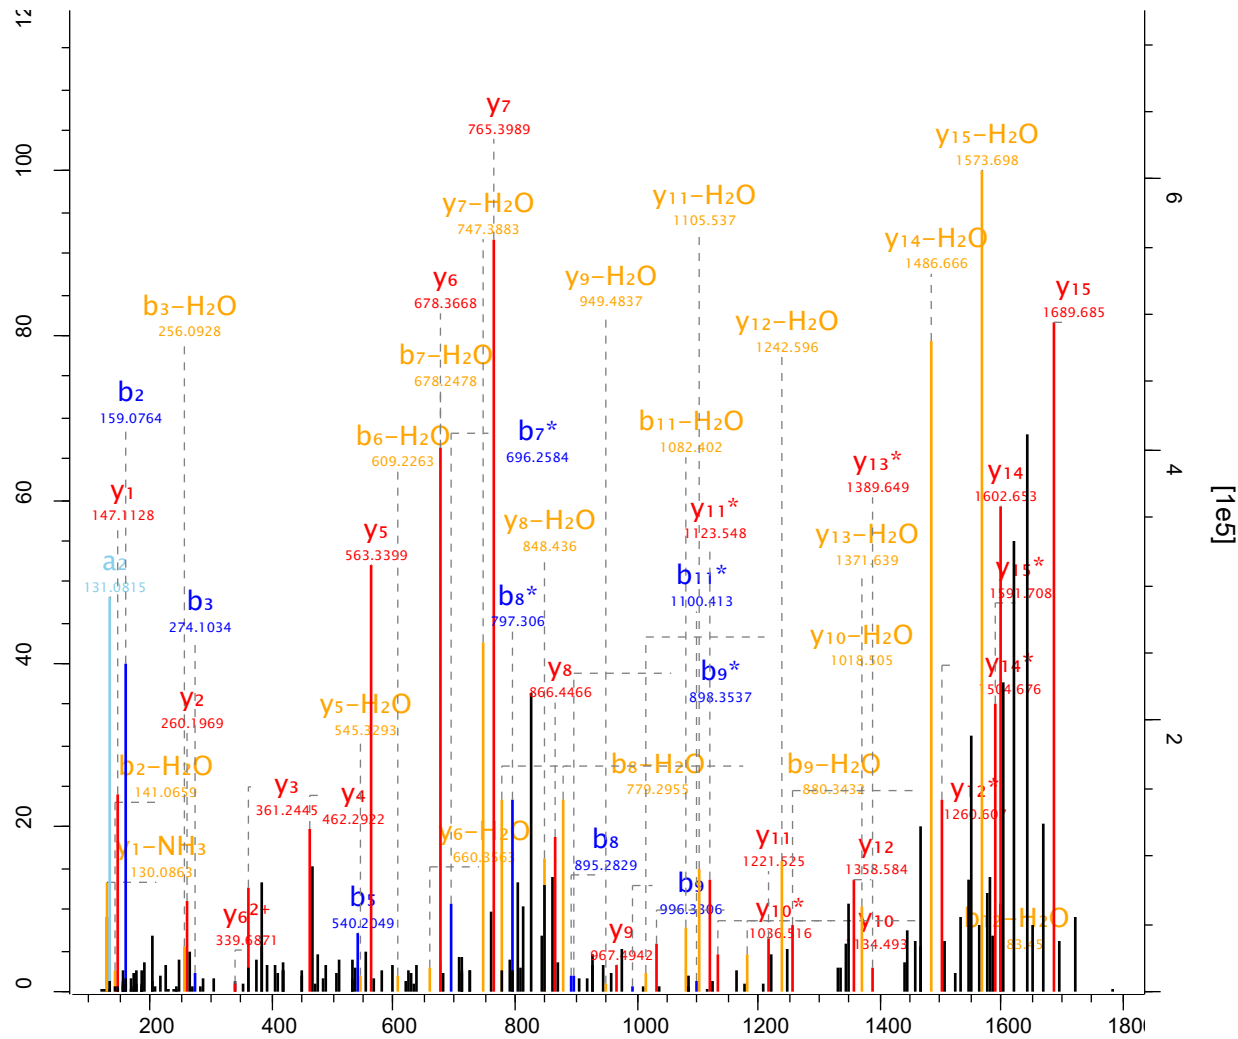

- A S D E H S ph S T T S D T T T I  
 b<sub>2</sub> b<sub>3</sub> b<sub>5</sub> b<sub>7</sub><sup>\*</sup> b<sub>8</sub> b<sub>9</sub> b<sub>11</sub><sup>\*</sup>

y<sub>1</sub>  
 K -

Raw file Scan Method Score m/z  
 sys\_02\_2 3437 FTMS; HCD 88.07 851.83

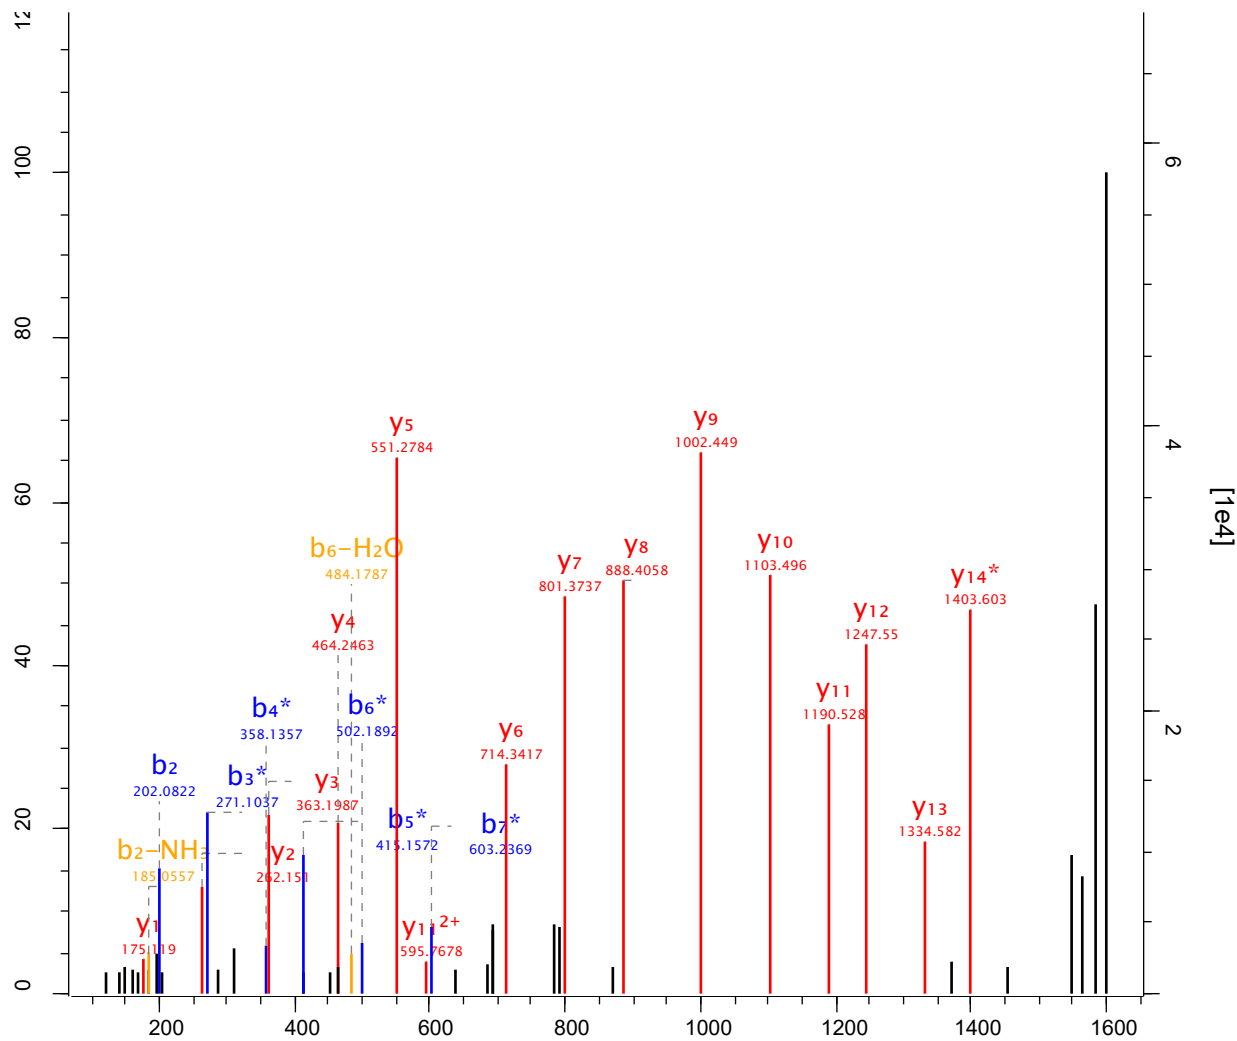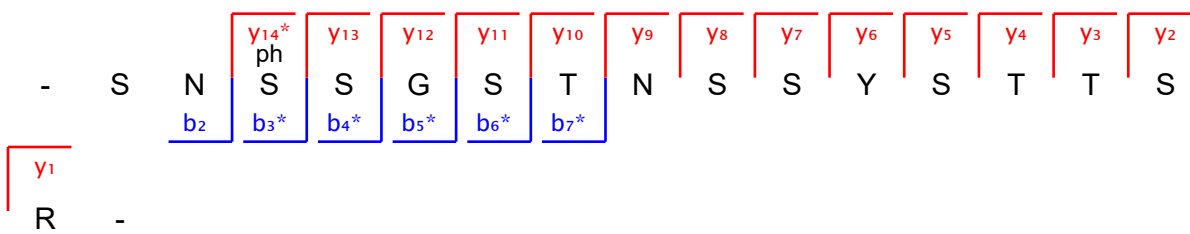

Raw file Scan Method Score m/z  
 sys\_02\_2 3460 FTMS; HCD 168 611.77

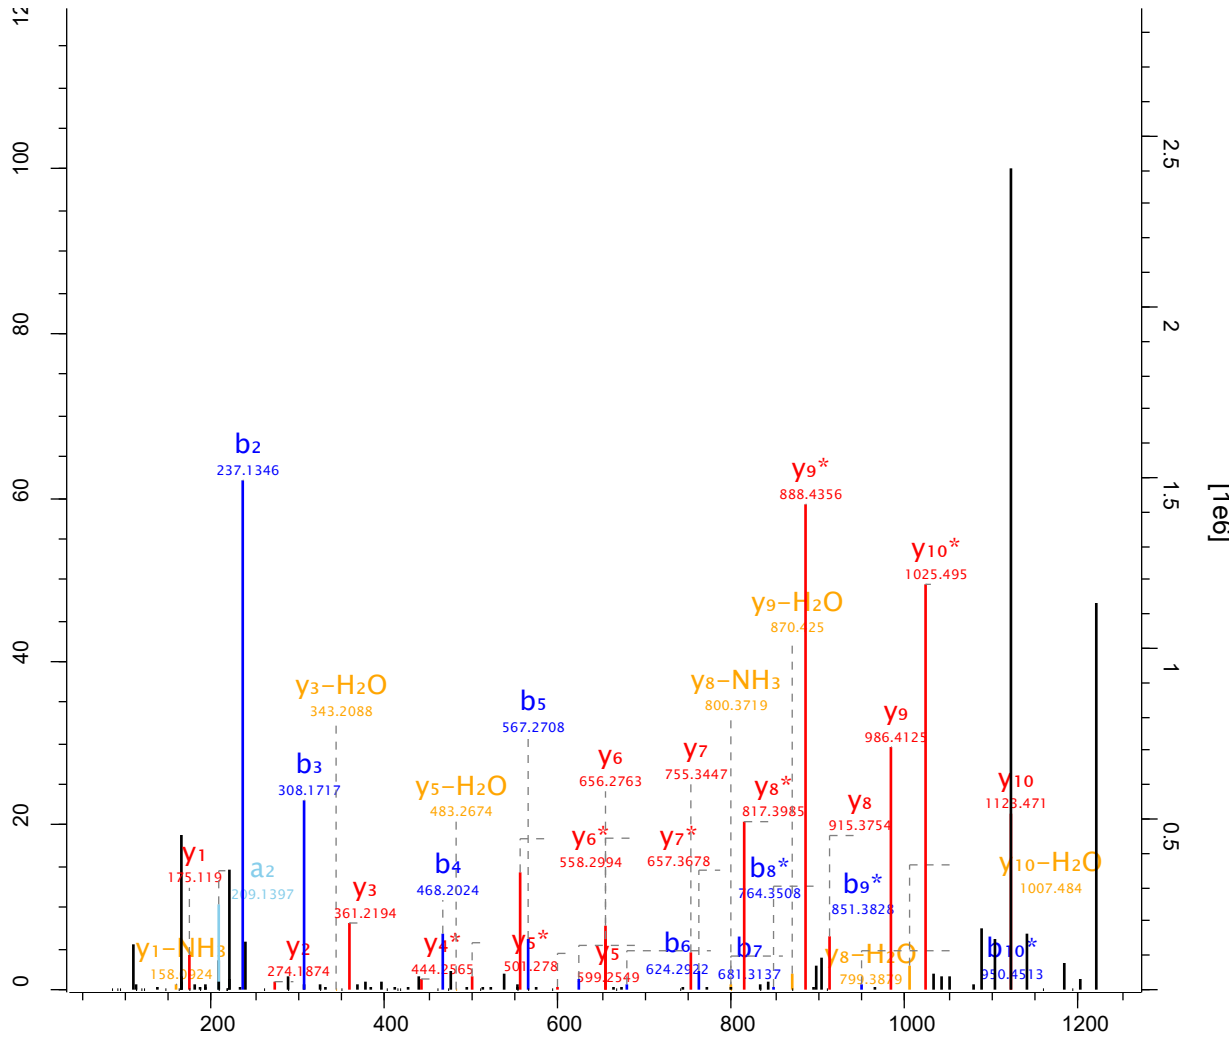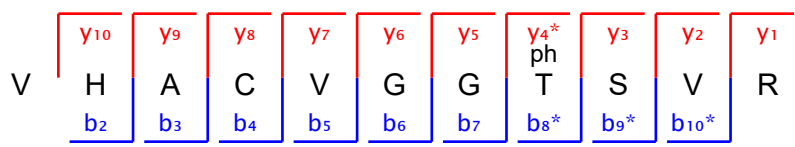

Raw file Scan Method Score m/z  
 sys\_02\_2 3518 FTMS; HCD 80.24 649.61

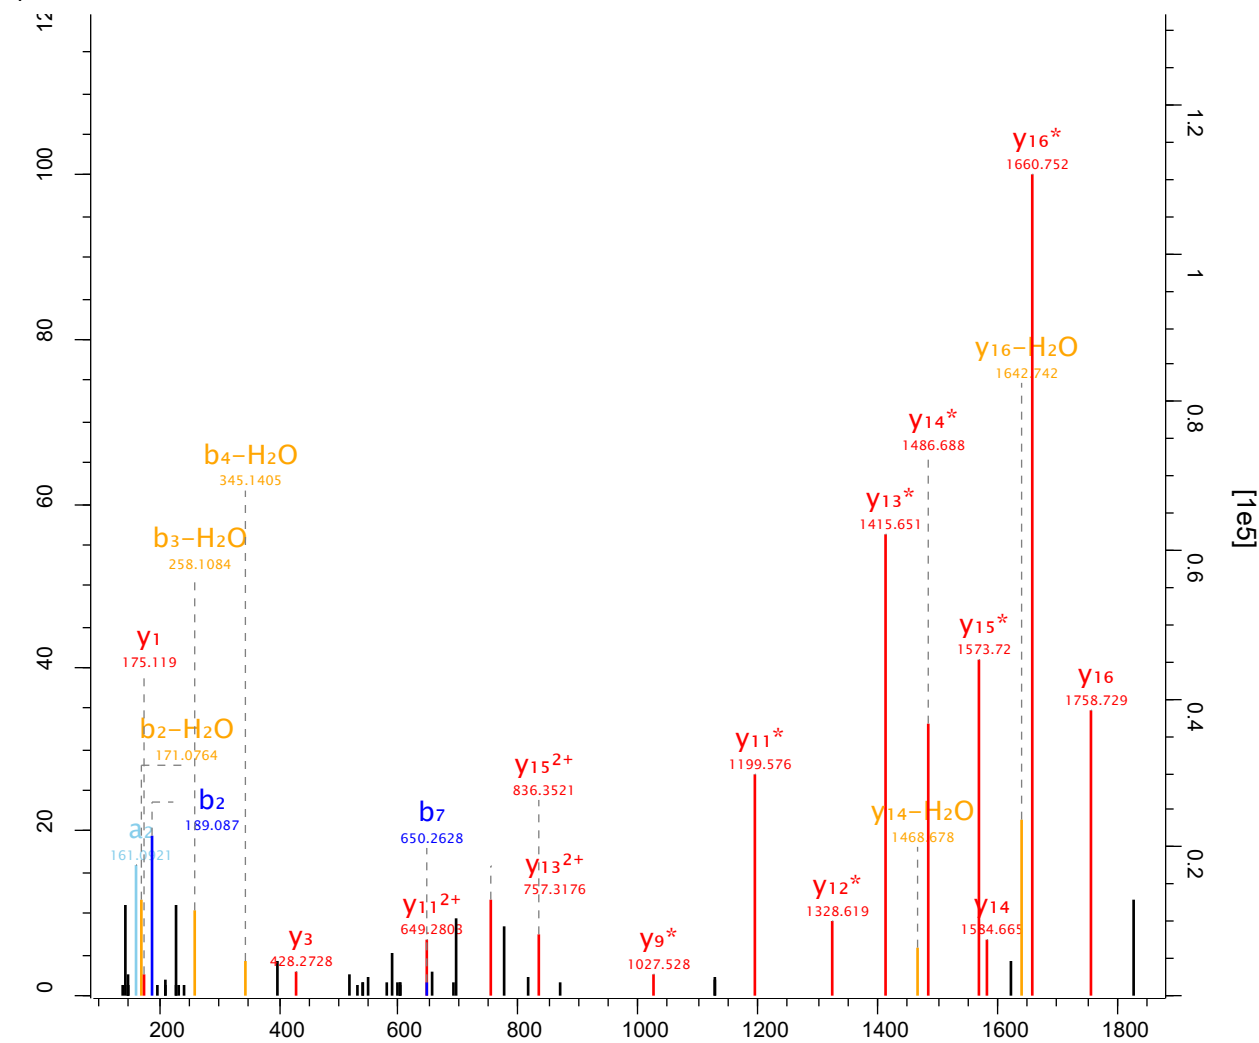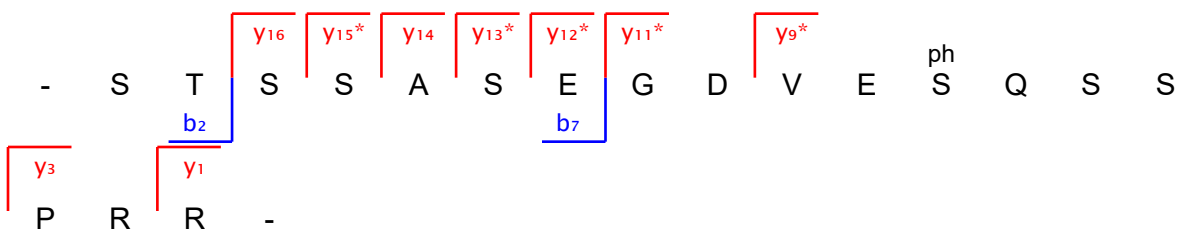

| Raw file | Scan | Method    | Score | m/z    |
|----------|------|-----------|-------|--------|
| sys_02_2 | 3556 | FTMS; HCD | 89.47 | 605.59 |

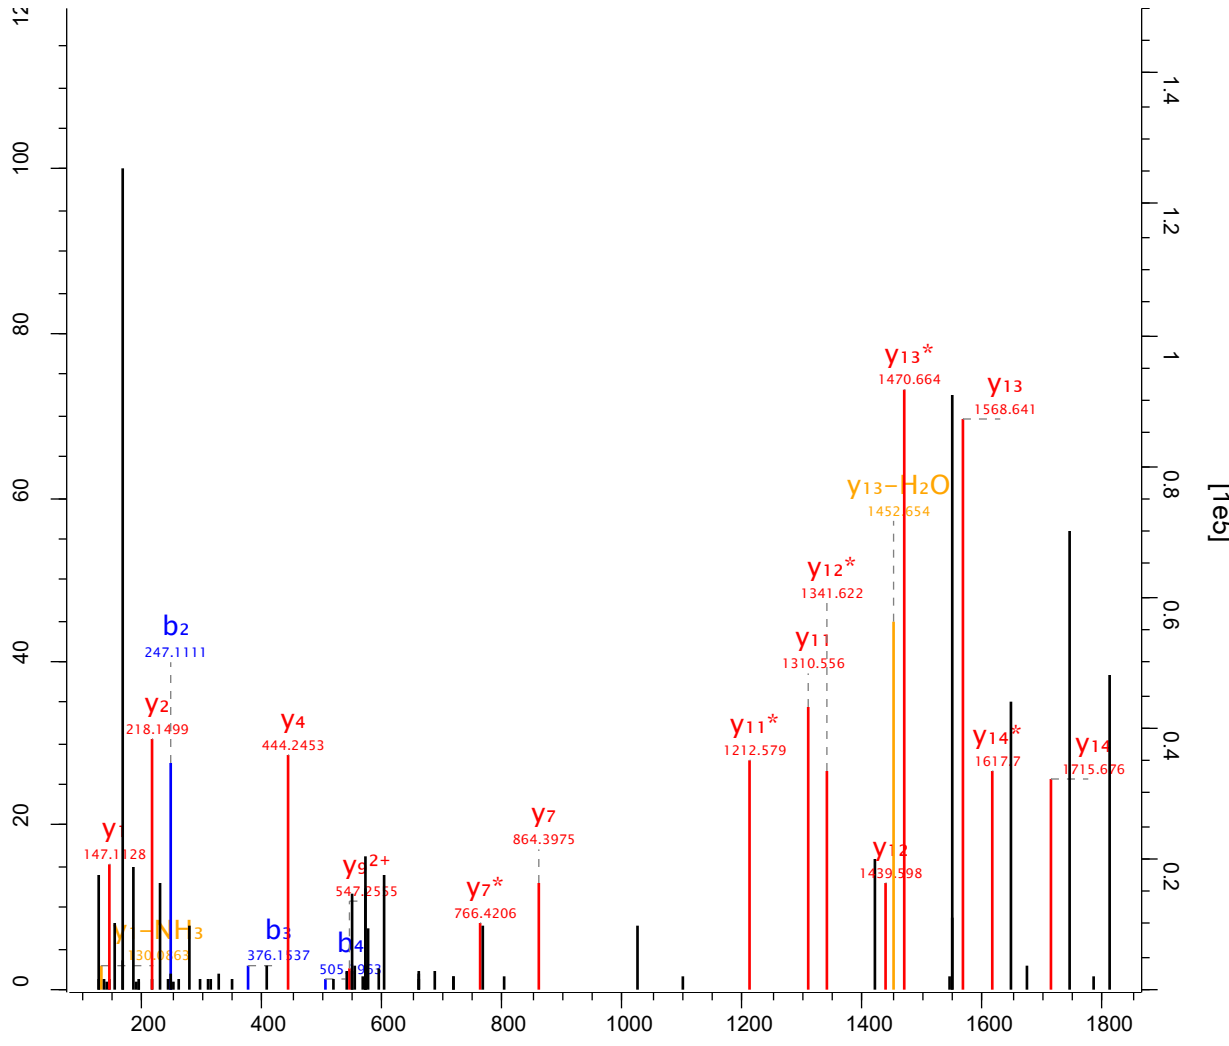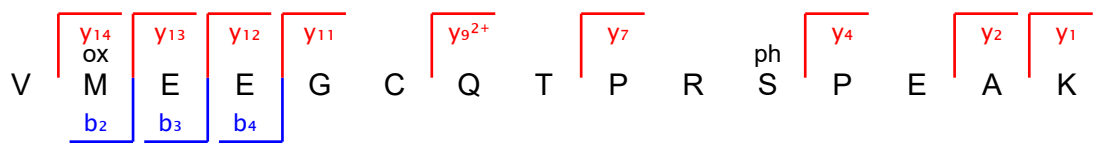

Raw file Scan Method Score m/z  
 sys\_02\_2 3754 FTMS; HCD 62.86 526.2

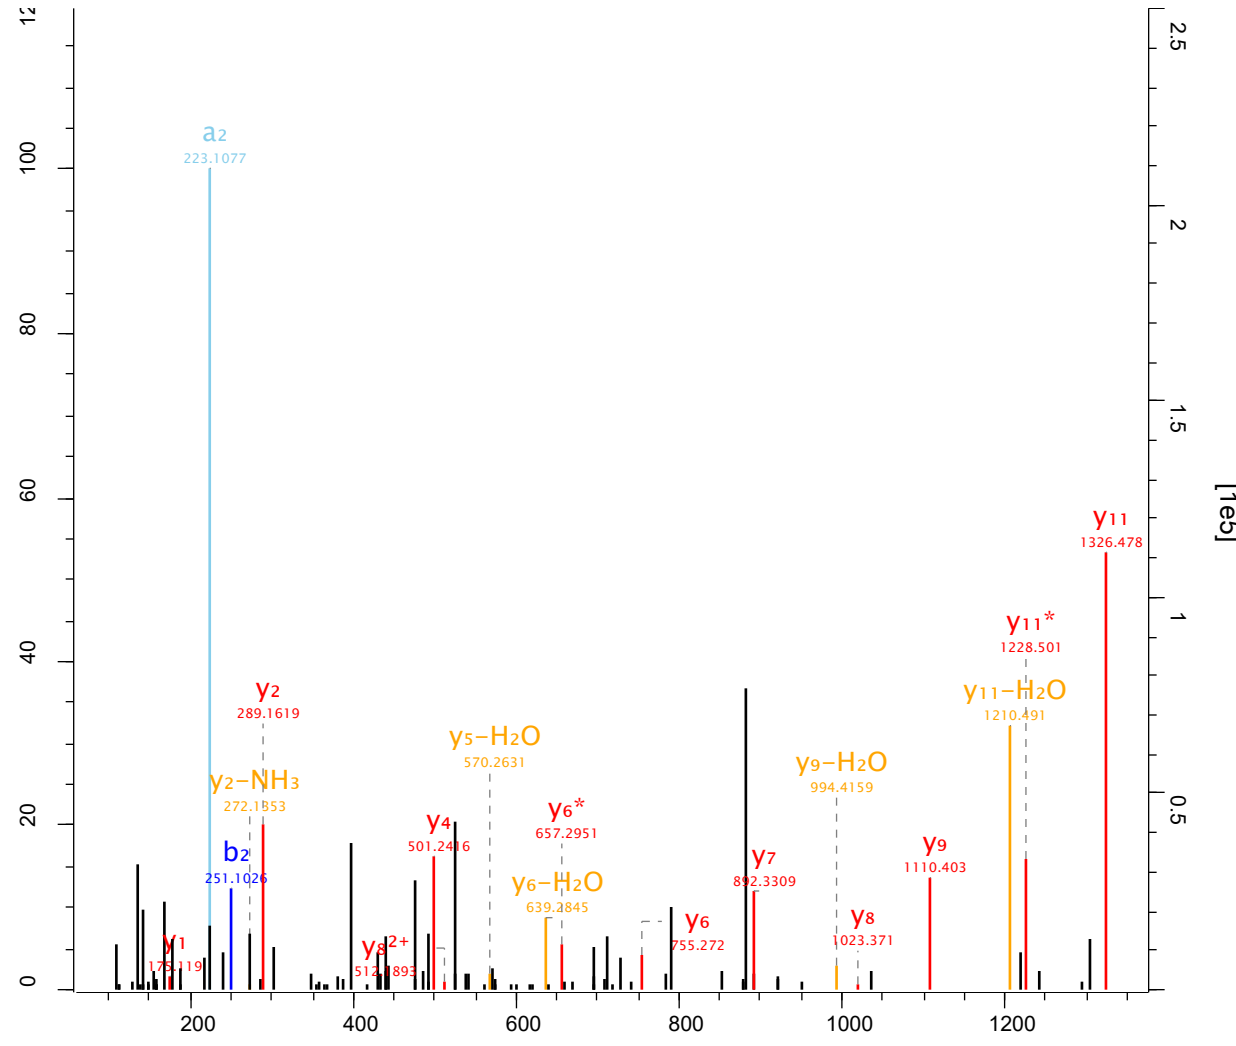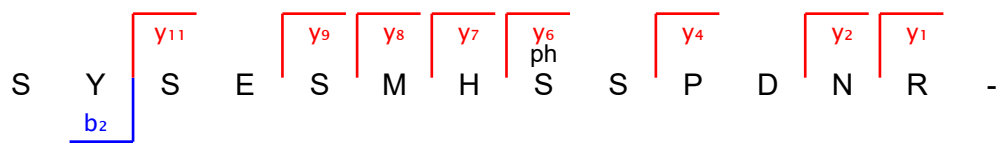



Raw file Scan Method Score m/z  
 sys\_02\_2 3791 FTMS; HCD 168.43 586.27

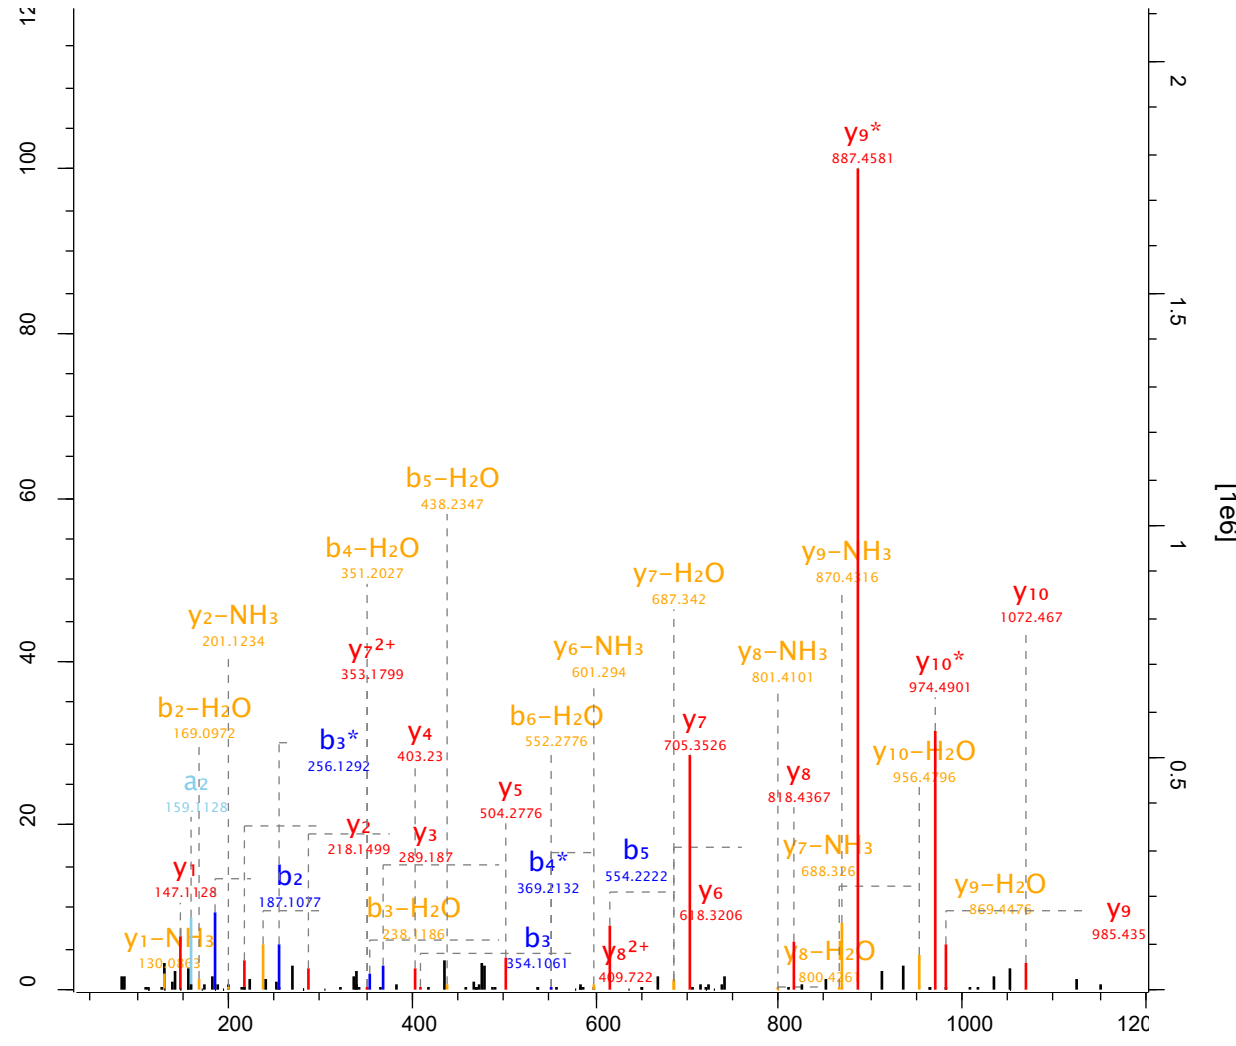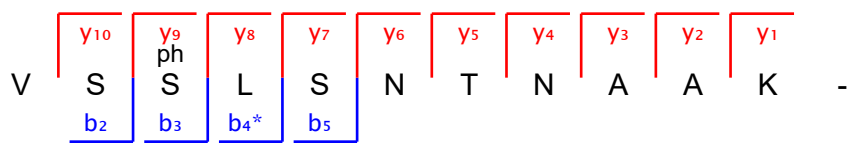

Raw file Scan Method Score m/z  
 sys\_02\_2 3795 FTMS; HCD 58.89 465.89

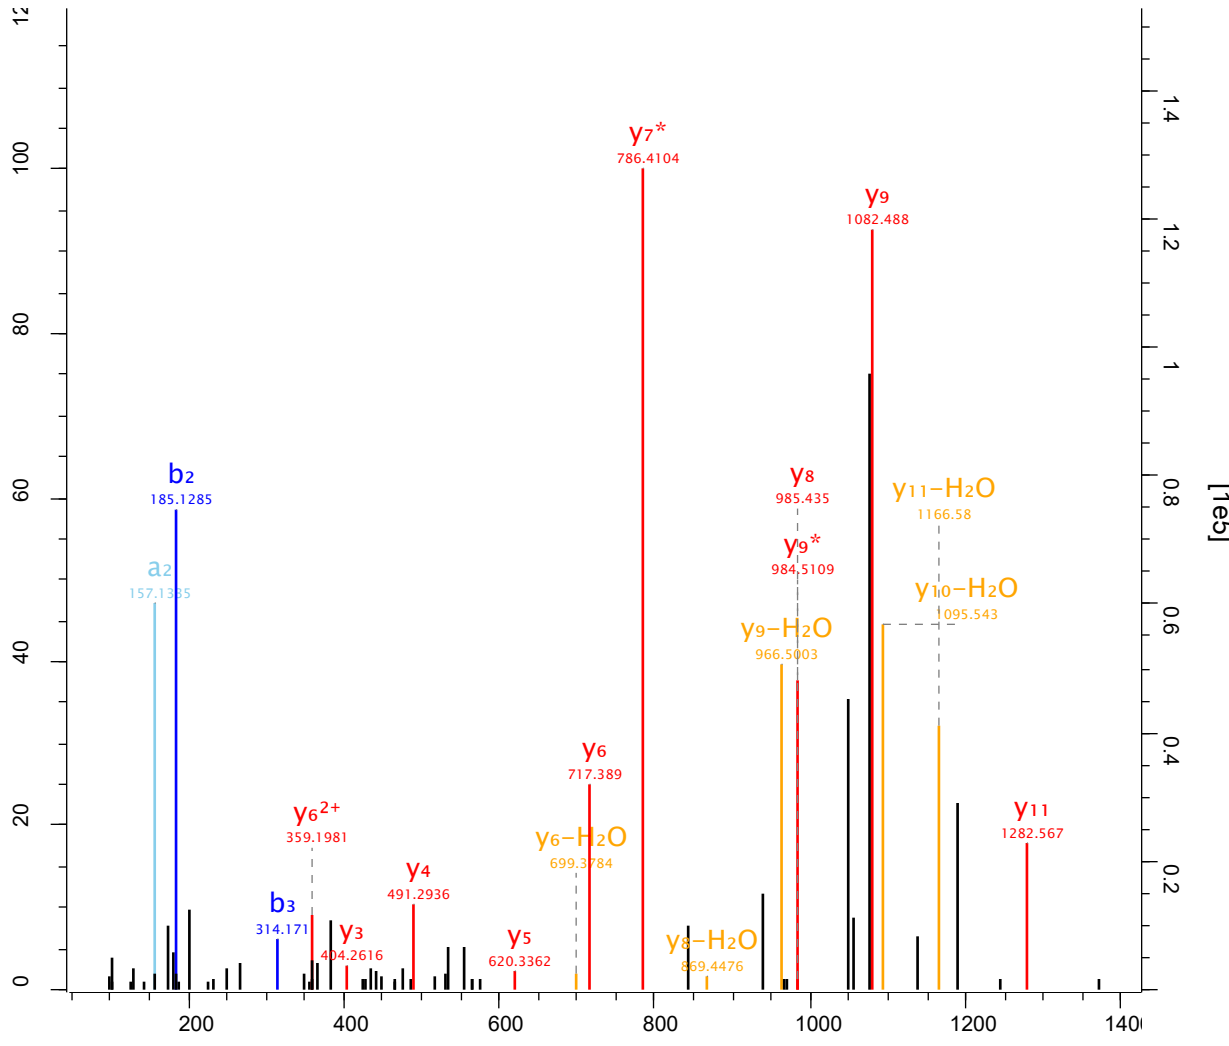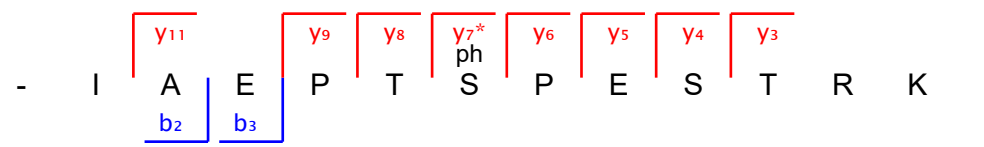



| Raw file | Scan | Method    | Score | m/z    |
|----------|------|-----------|-------|--------|
| sys_02_2 | 3950 | FTMS; HCD | 40.48 | 615.27 |

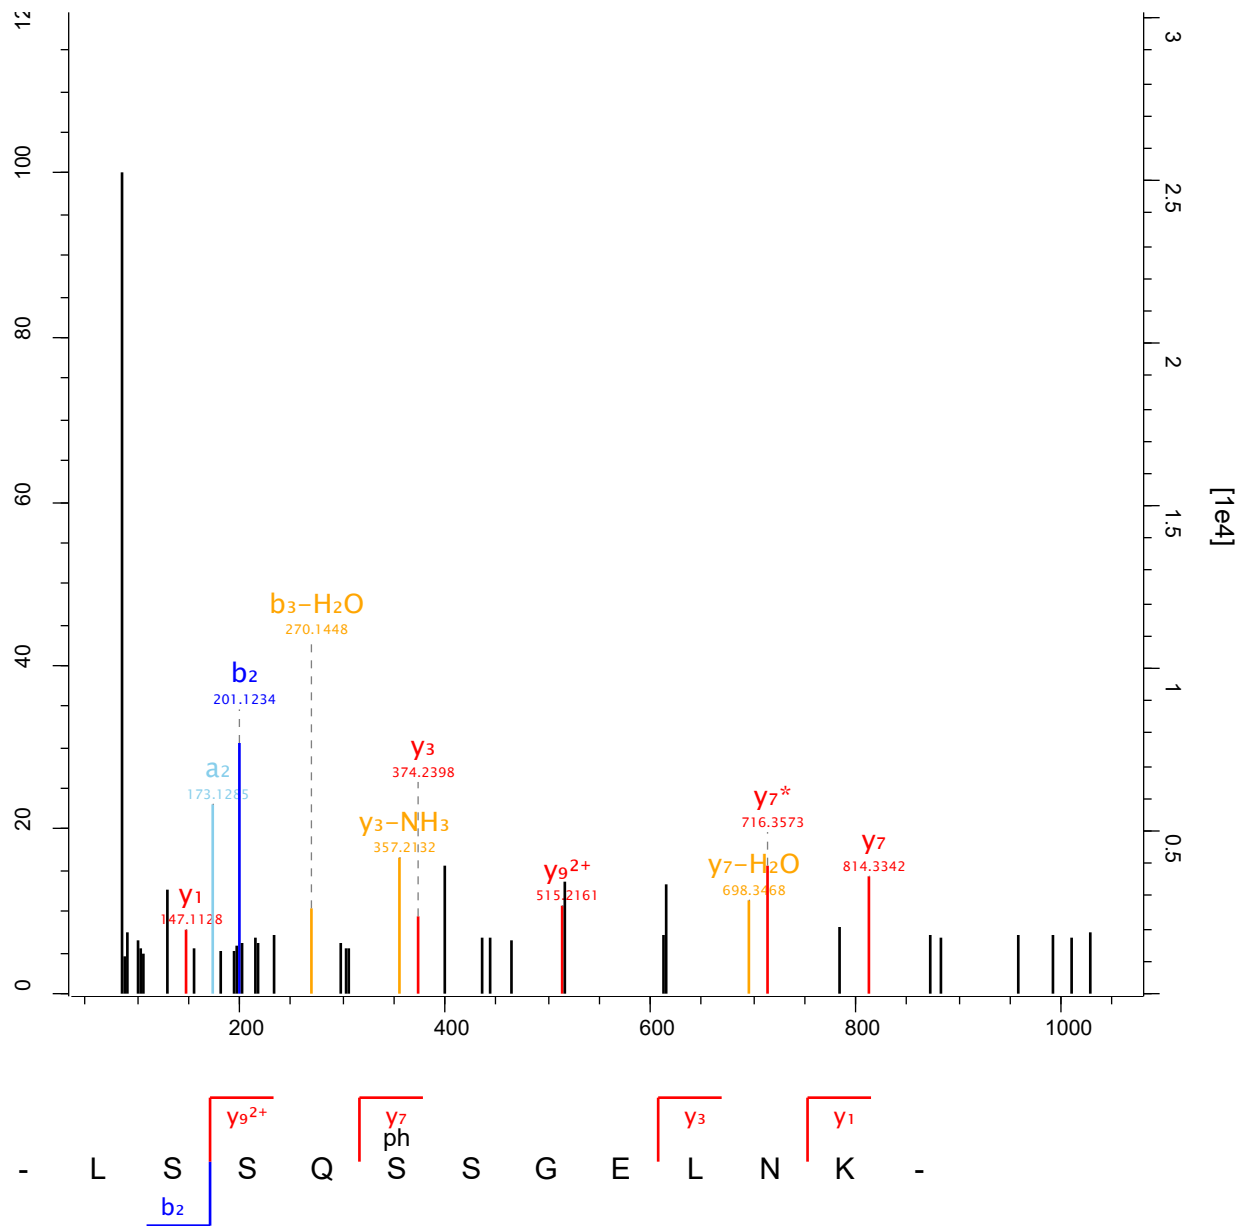

| Raw file | Scan | Method    | Score | m/z    |
|----------|------|-----------|-------|--------|
| sys_02_2 | 3953 | FTMS; HCD | 124.6 | 402.19 |

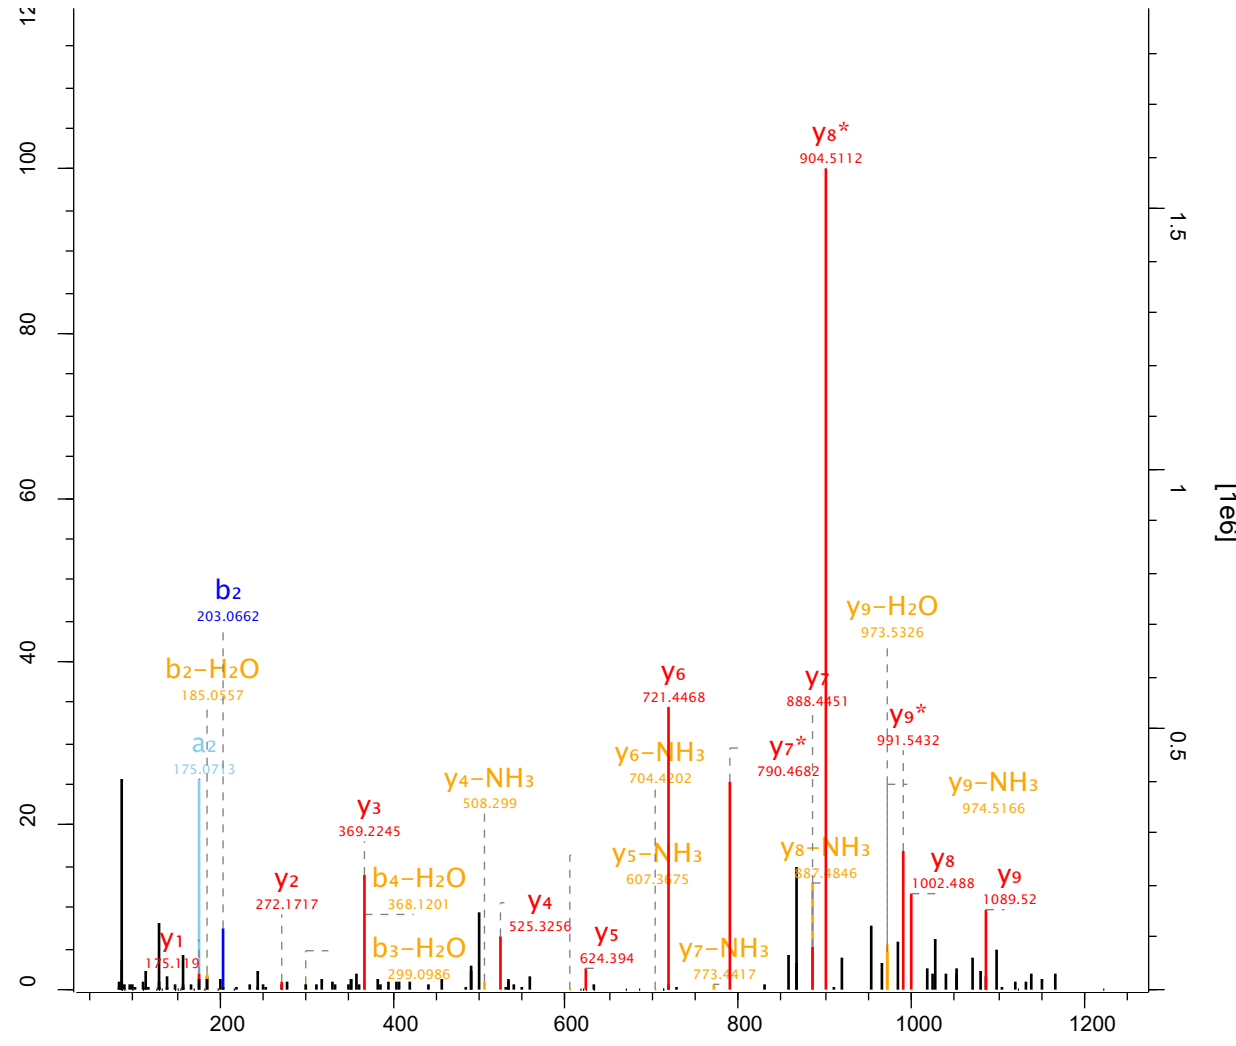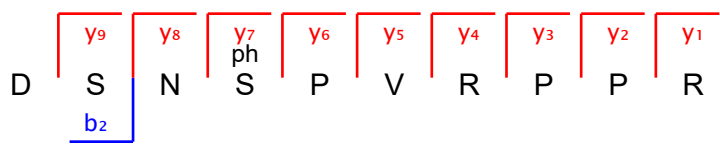

| Raw file | Scan | Method    | Score | m/z    |
|----------|------|-----------|-------|--------|
| sys_02_2 | 4013 | FTMS; HCD | 70.2  | 738.79 |

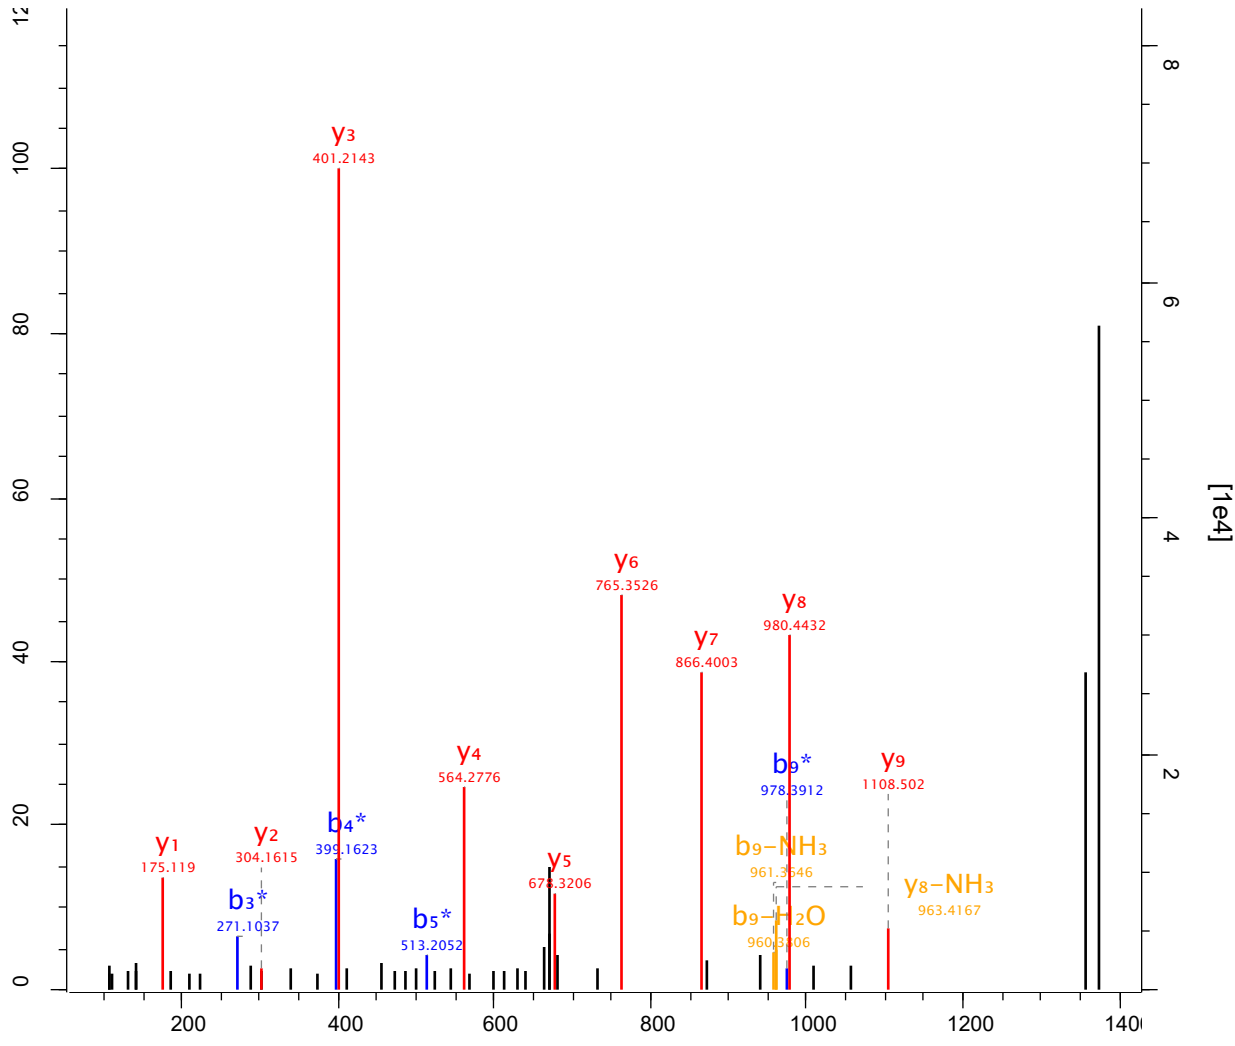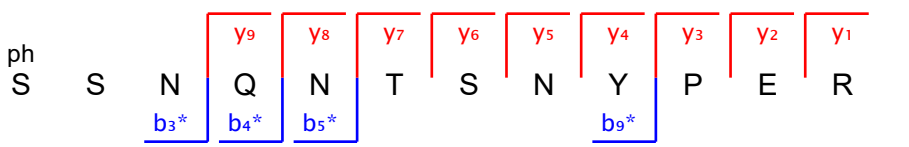

Raw file Scan Method Score m/z  
 sys\_02\_2 4025 FTMS; HCD 149.83 546.78

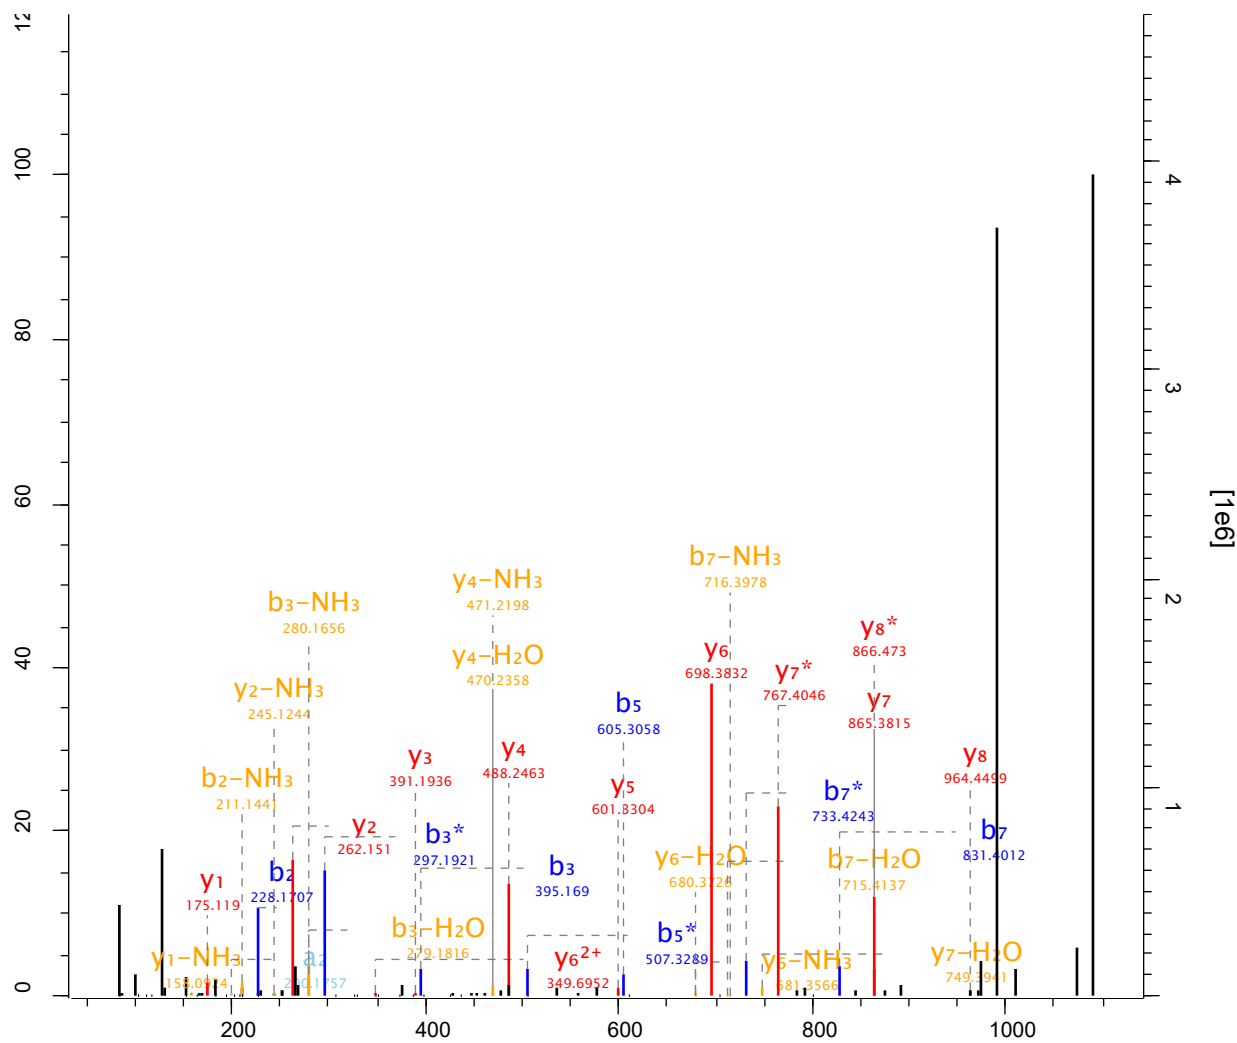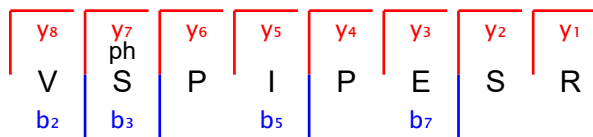

Raw file Scan Method Score m/z  
 sys\_02\_2 4034 FTMS; HCD 90.56 464.88

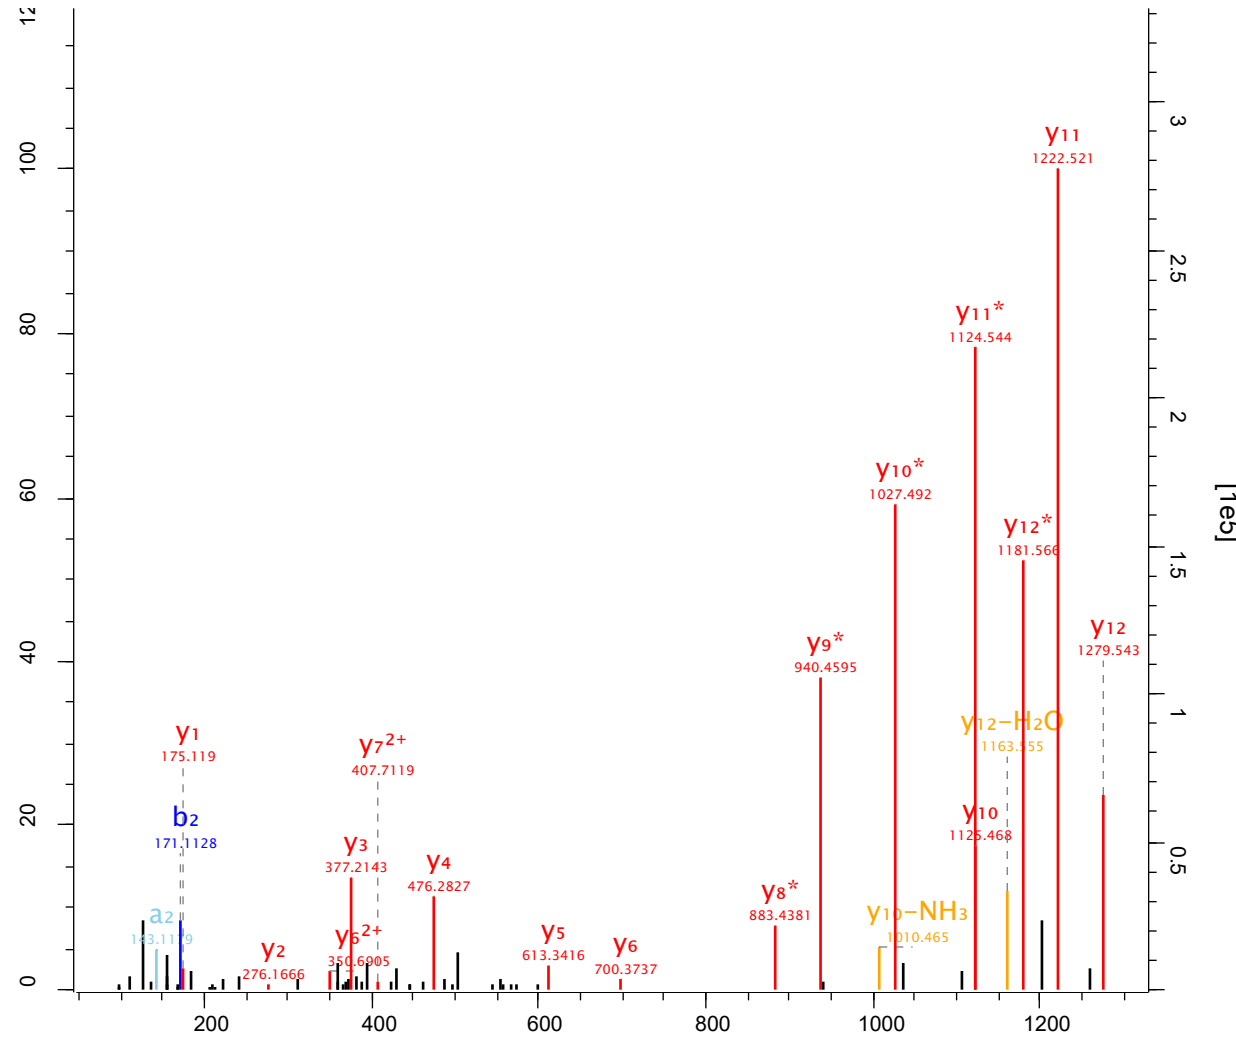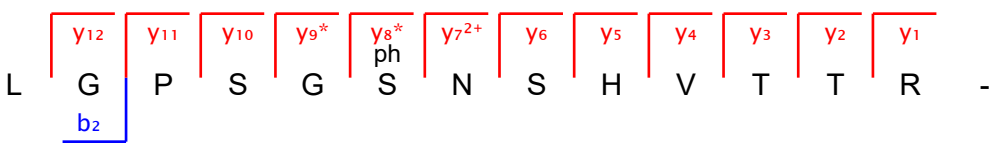



Raw file Scan Method Score m/z  
 sys\_02\_2 4061 FTMS; HCD 68 569.26

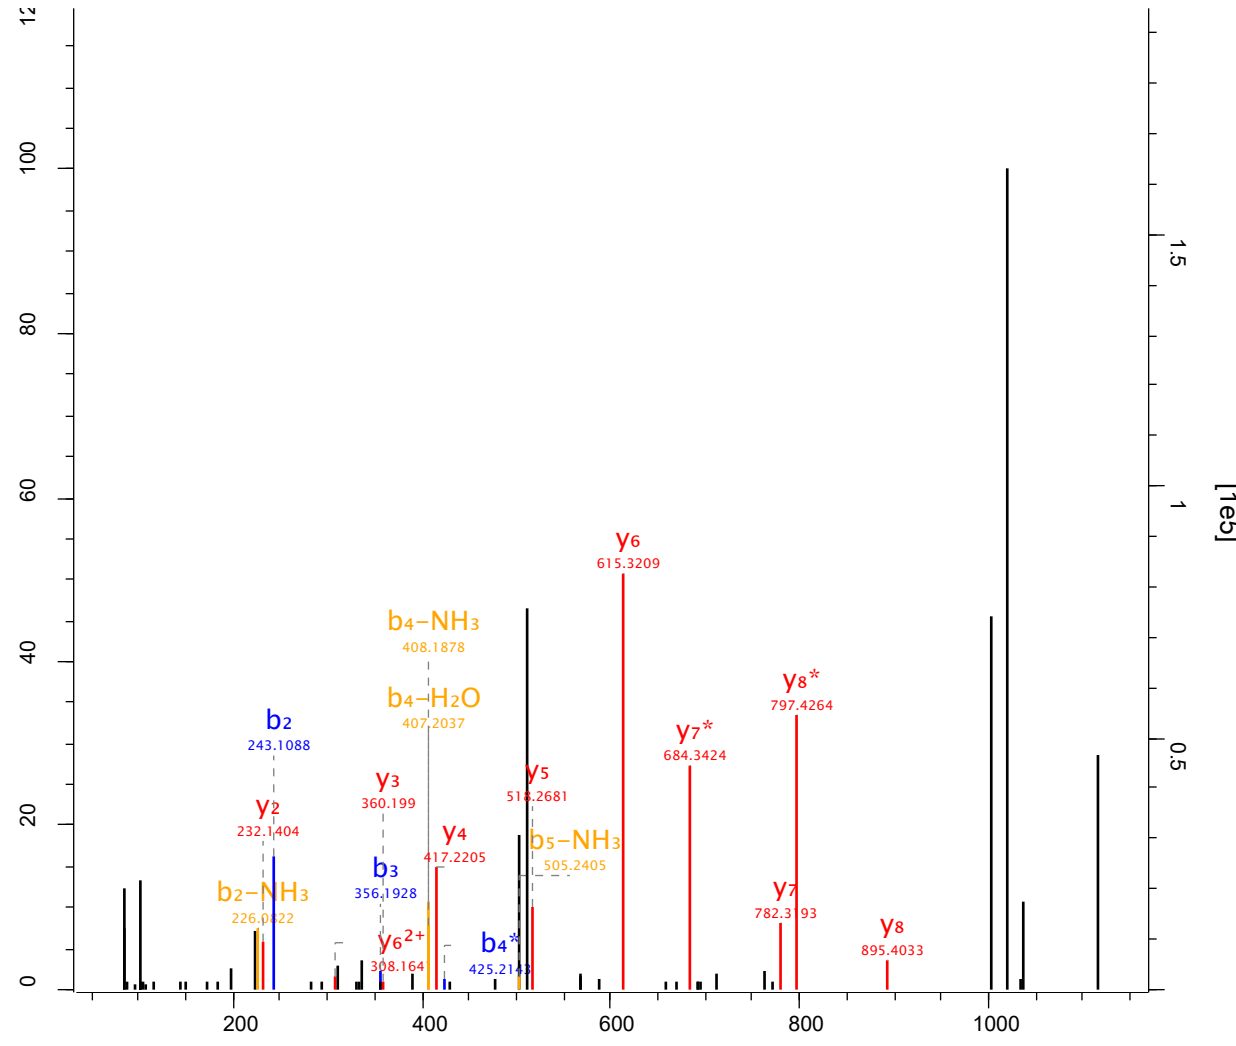

- Q N I S P T G Q G R -

b<sub>2</sub>
b<sub>3</sub>
b<sub>4</sub><sup>\*</sup>
y<sub>8</sub>
y<sub>7</sub>  
ph
y<sub>6</sub>
y<sub>5</sub>
y<sub>4</sub>
y<sub>3</sub>
y<sub>2</sub>

| Raw file | Scan | Method    | Score | m/z    |
|----------|------|-----------|-------|--------|
| sys_02_2 | 4063 | FTMS; HCD | 49.59 | 654.29 |

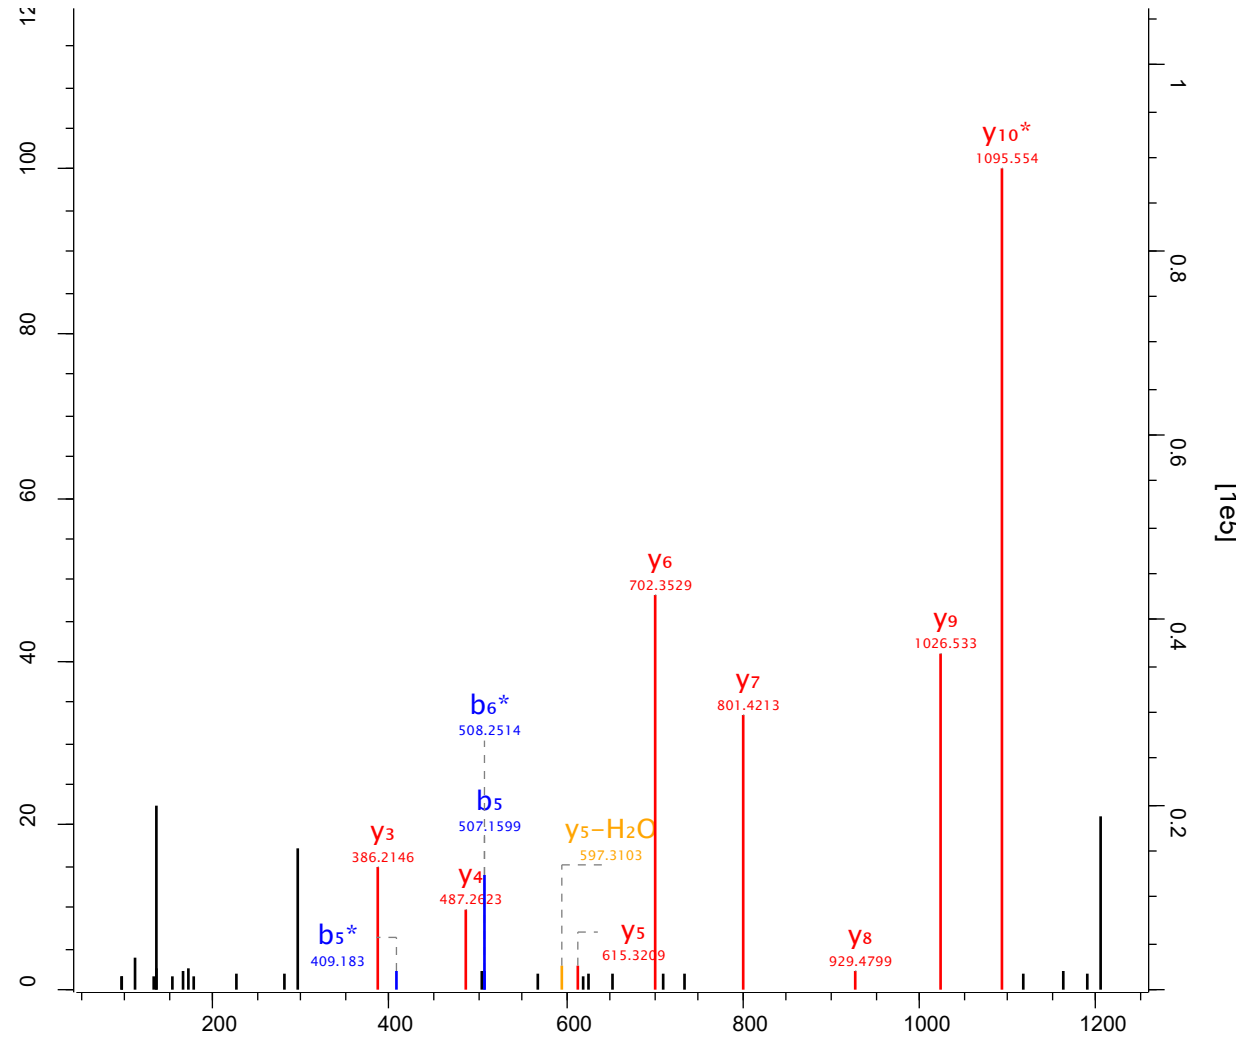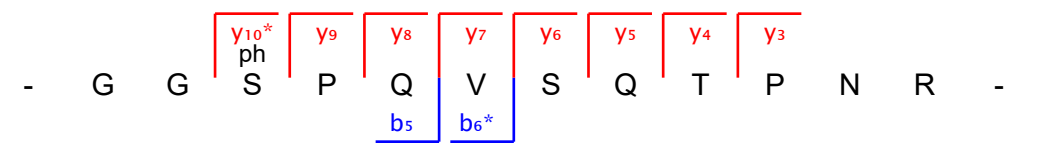

Raw file Scan Method Score m/z  
 sys\_02\_2 4082 FTMS; HCD 52.86 381.49

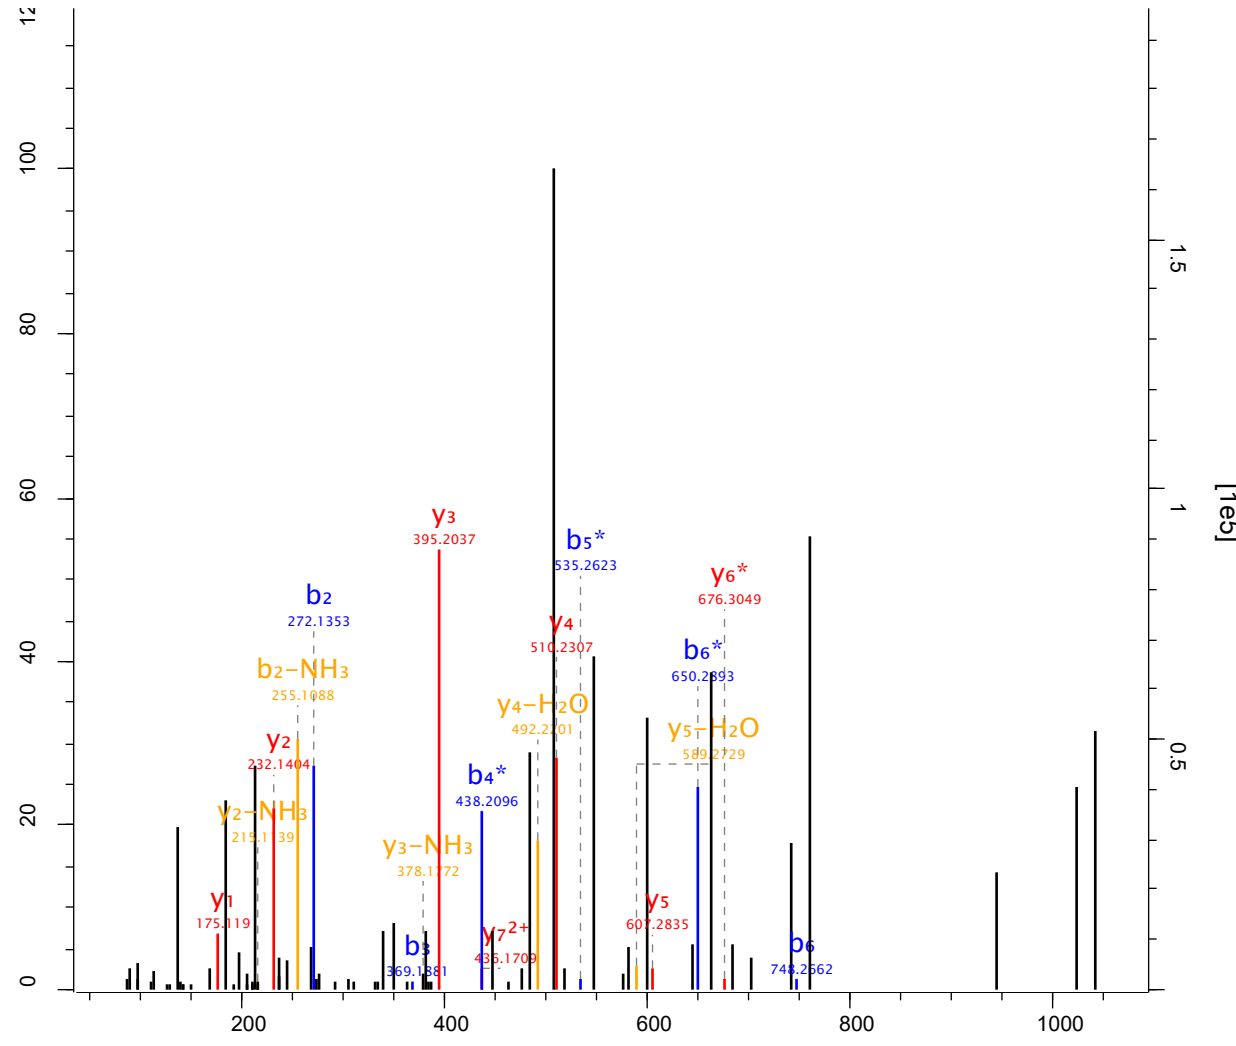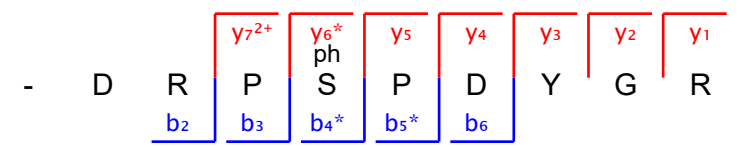



Raw file Scan Method Score m/z  
 sys\_02\_2 4203 FTMS; HCD 81.57 566.24

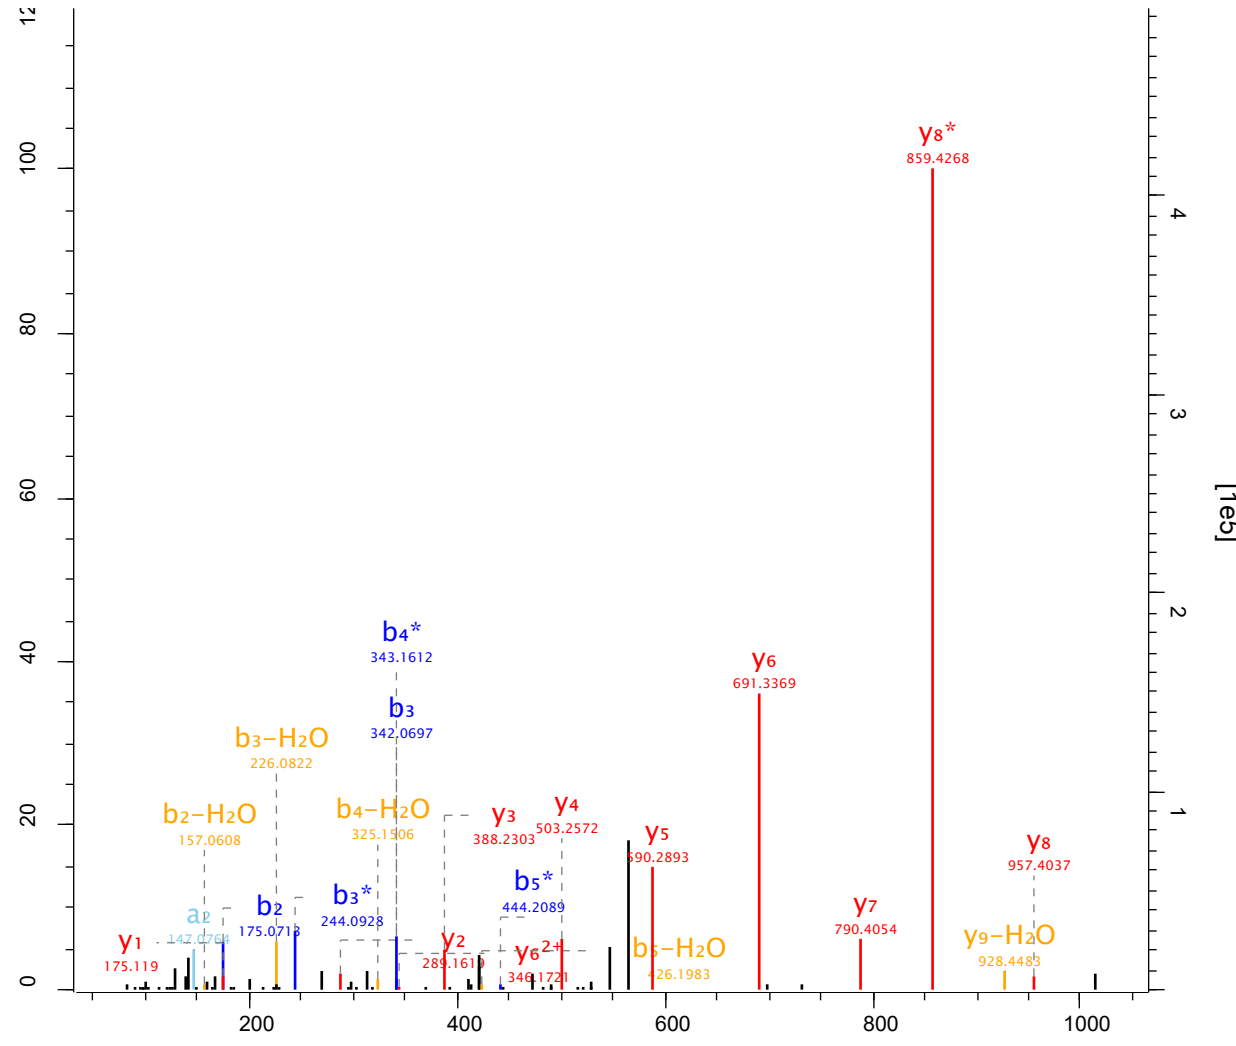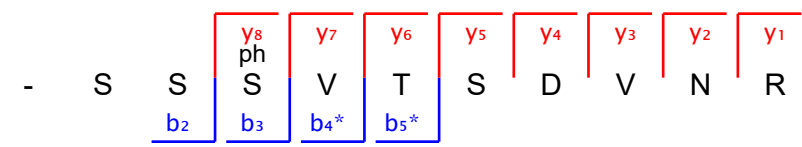

Raw file Scan Method Score m/z  
 sys\_02\_2 4414 FTMS; HCD 112.02 476.23

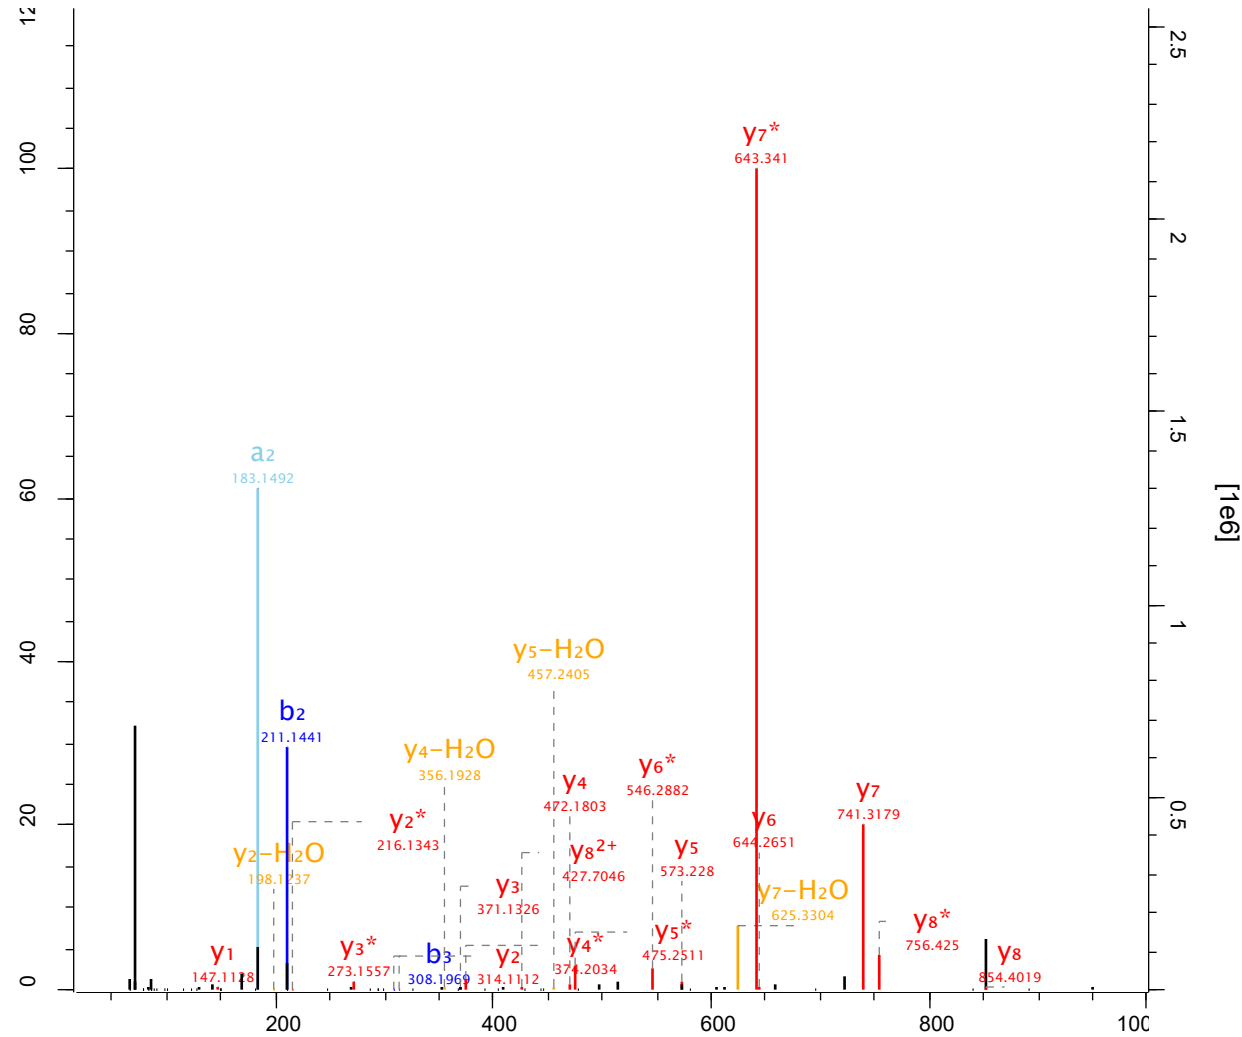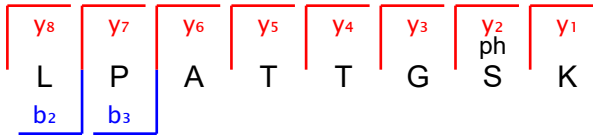

Raw file Scan Method Score m/z  
 sys\_02\_2 4429 FTMS; HCD 101.3 531.74

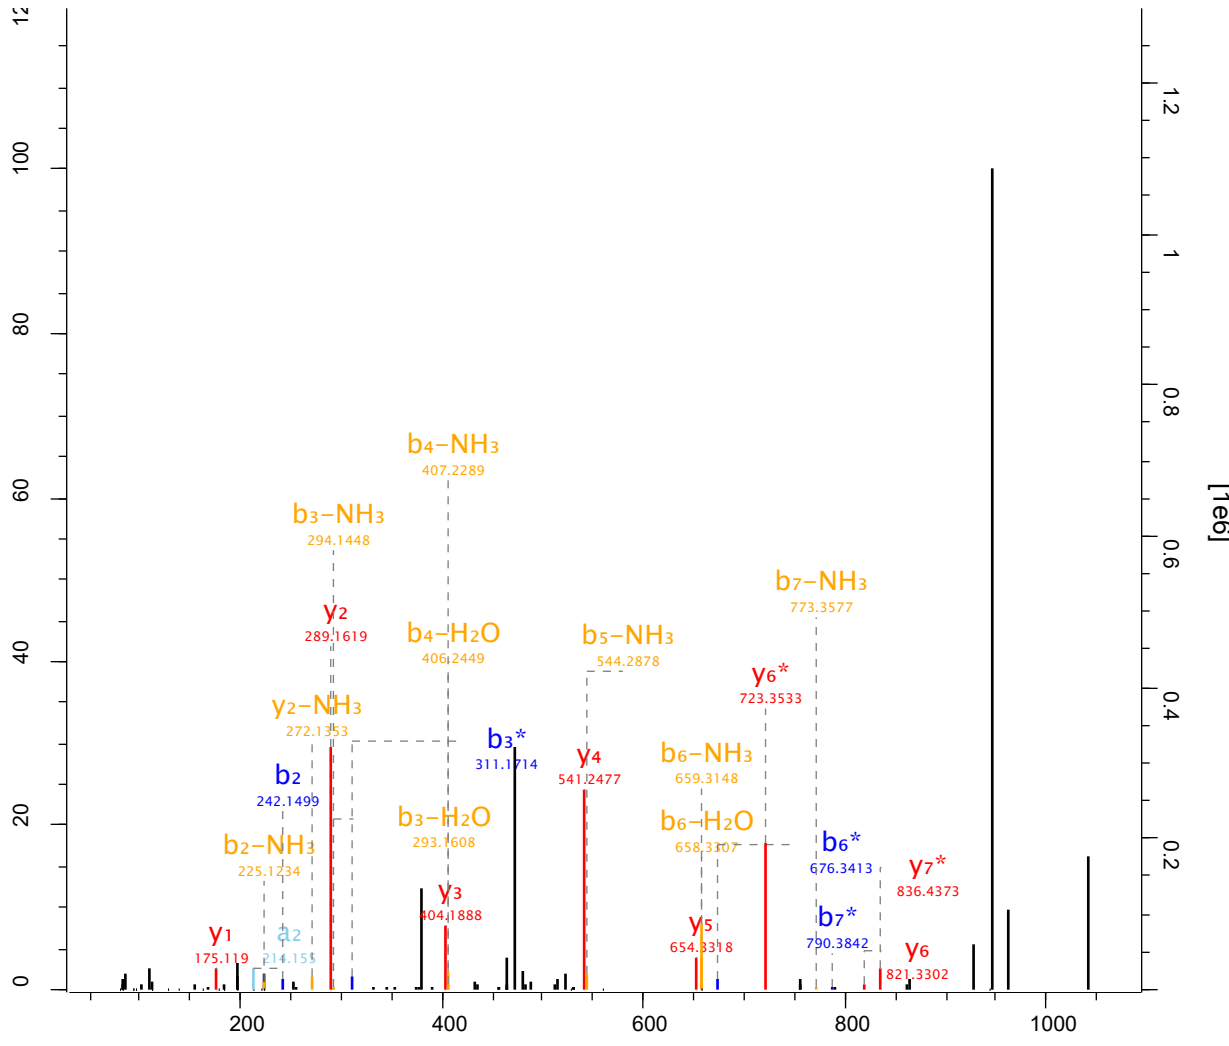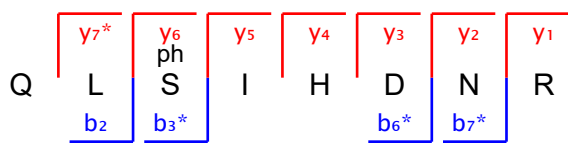

Raw file Scan Method Score m/z  
 sys\_02\_2 4609 FTMS; HCD 67.22 702.32

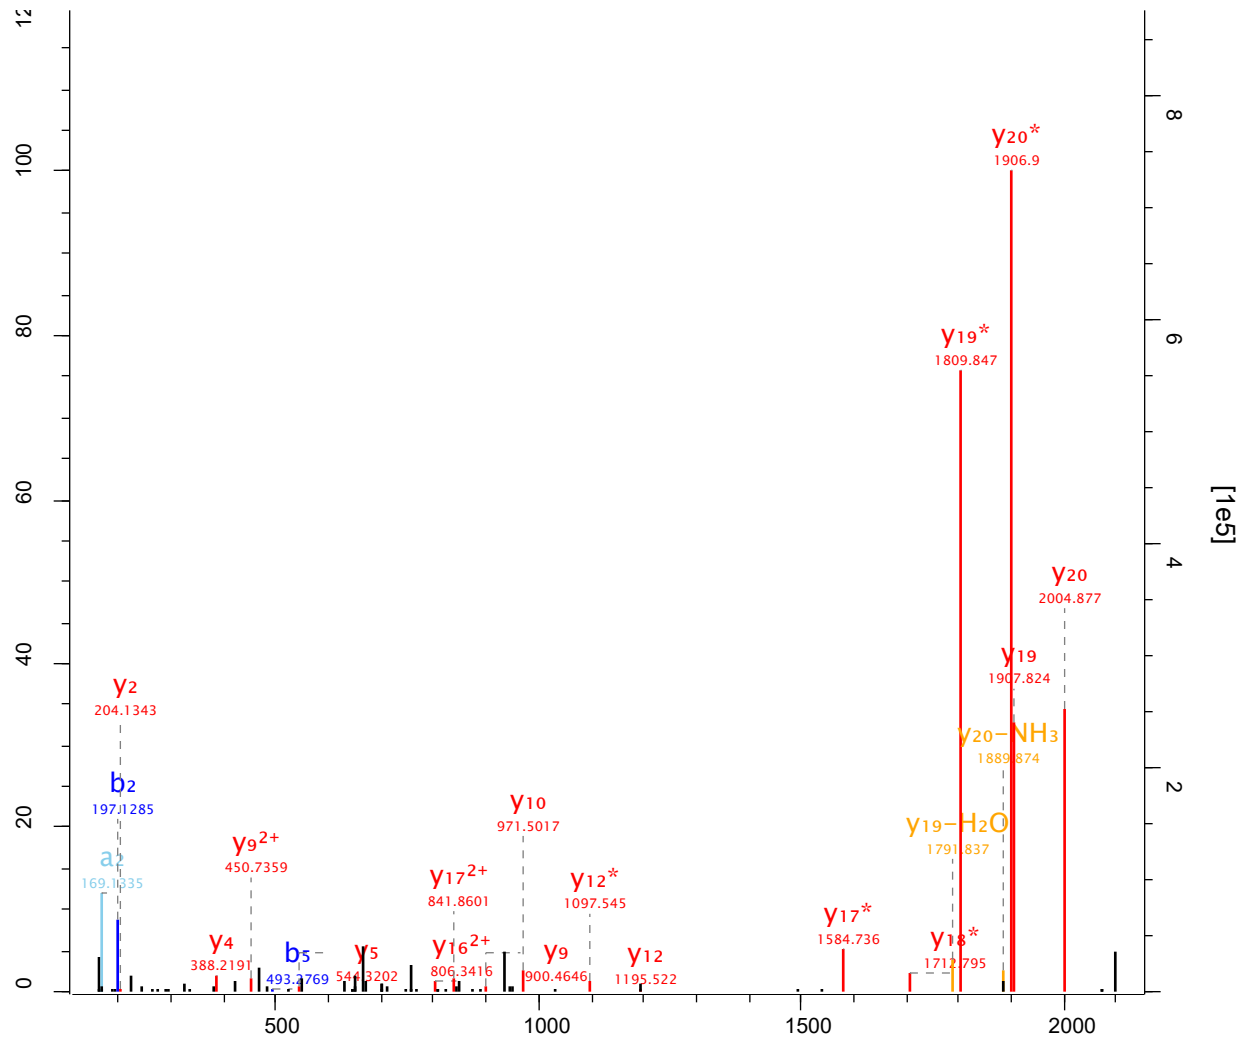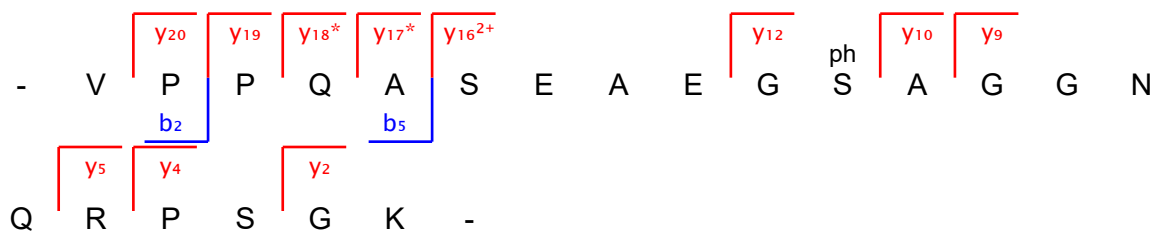



| Raw file | Scan | Method    | Score | m/z    |
|----------|------|-----------|-------|--------|
| sys_02_2 | 4627 | FTMS; HCD | 41.54 | 469.55 |

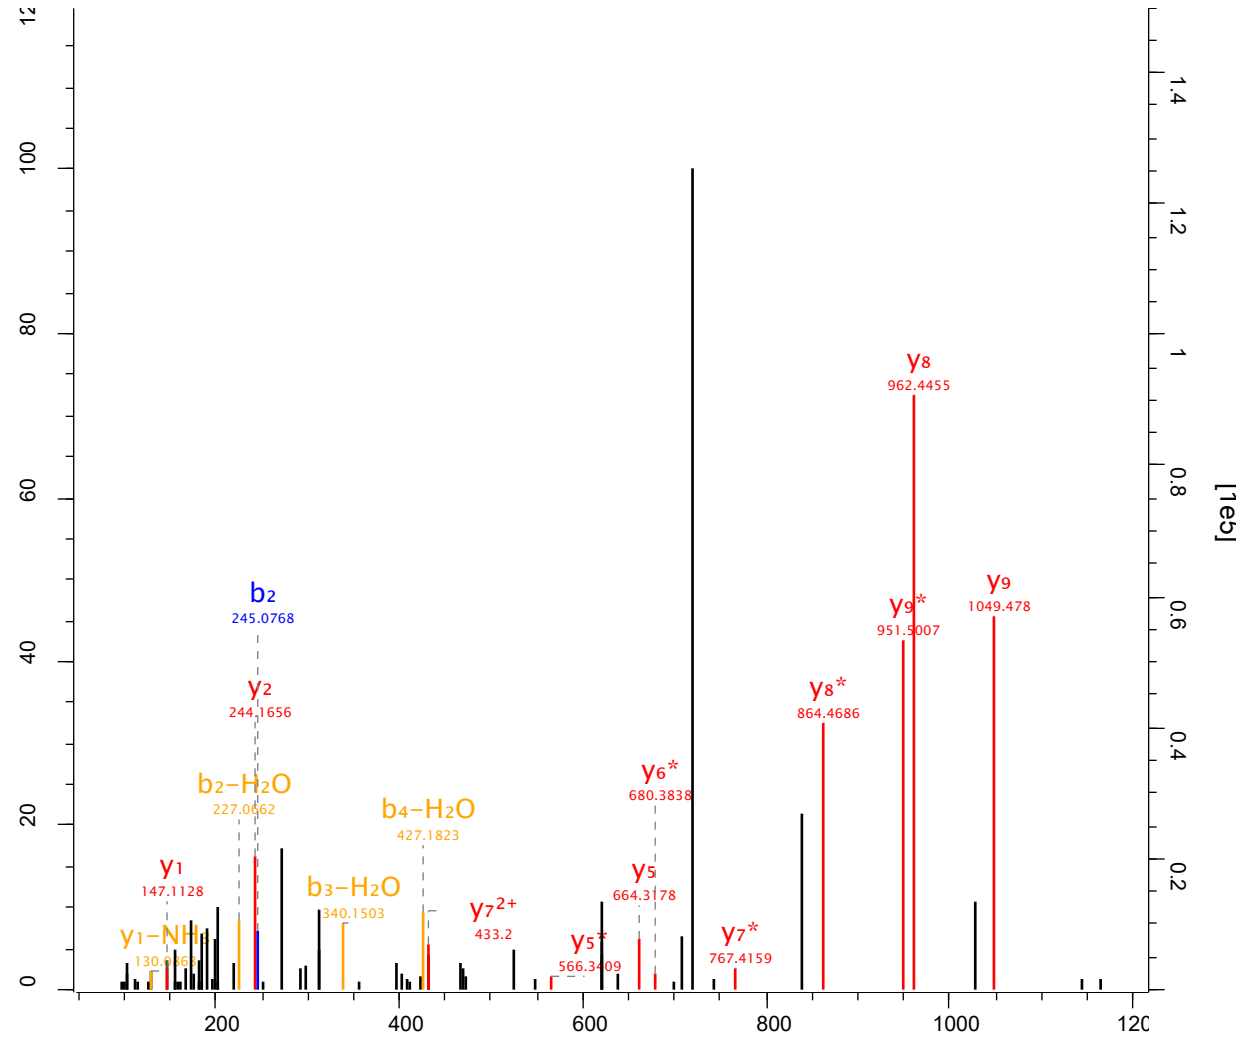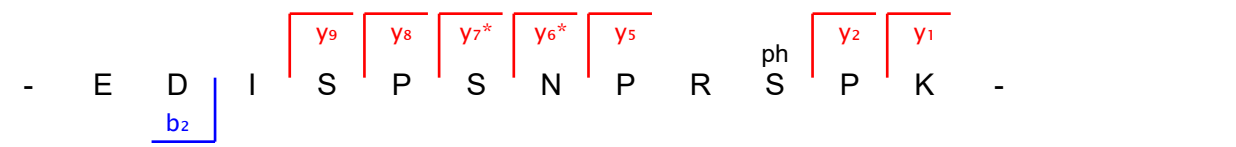

| Raw file | Scan | Method    | Score | m/z    |
|----------|------|-----------|-------|--------|
| sys_02_2 | 4675 | FTMS; HCD | 76.07 | 605.78 |

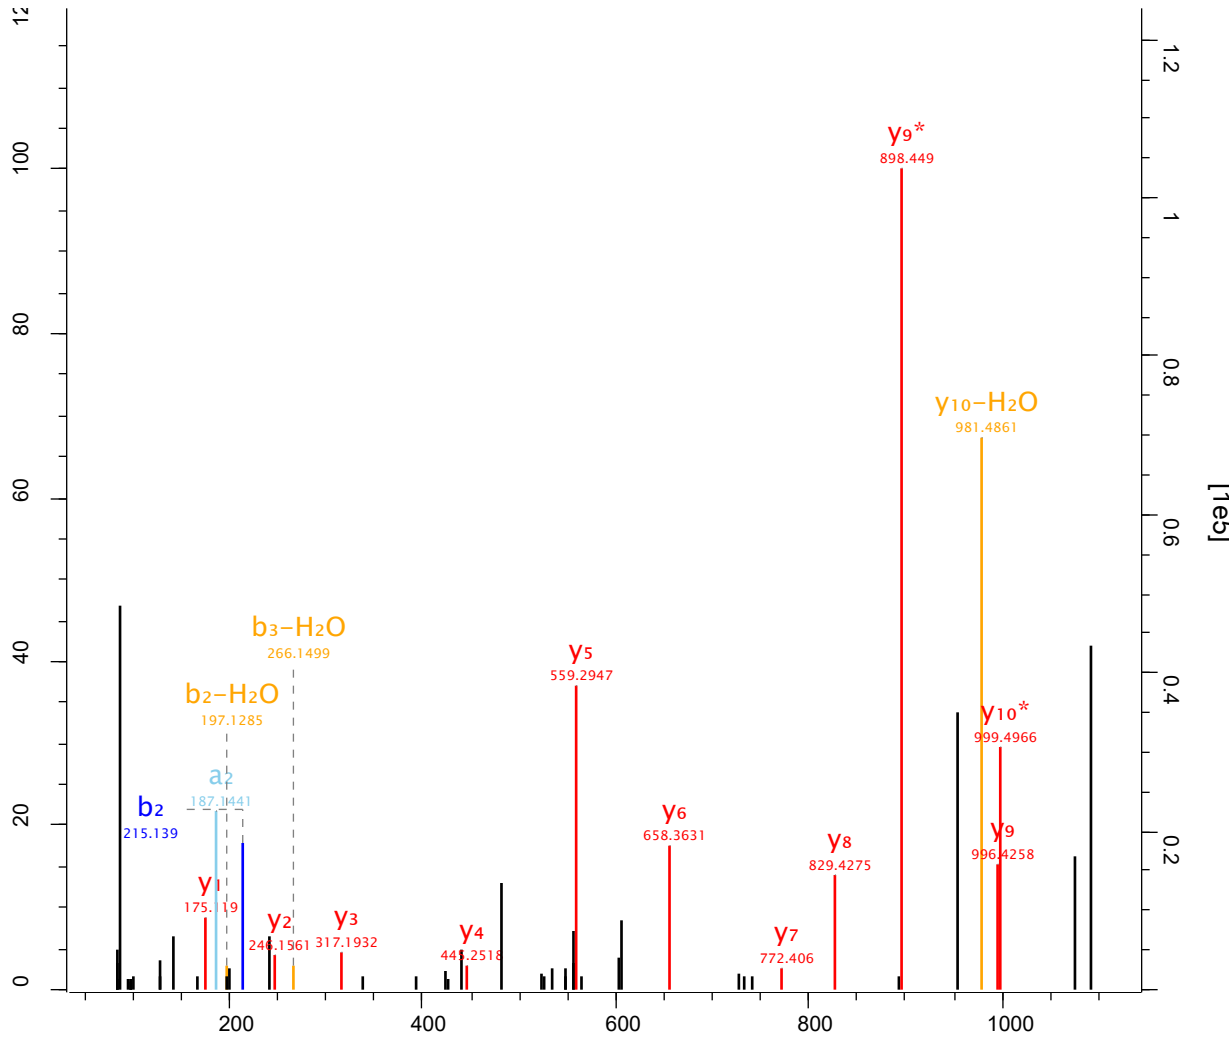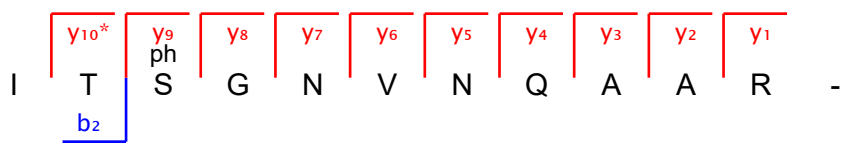

| Raw file | Scan | Method    | Score | m/z    |
|----------|------|-----------|-------|--------|
| sys_02_2 | 4786 | FTMS; HCD | 41.09 | 469.23 |

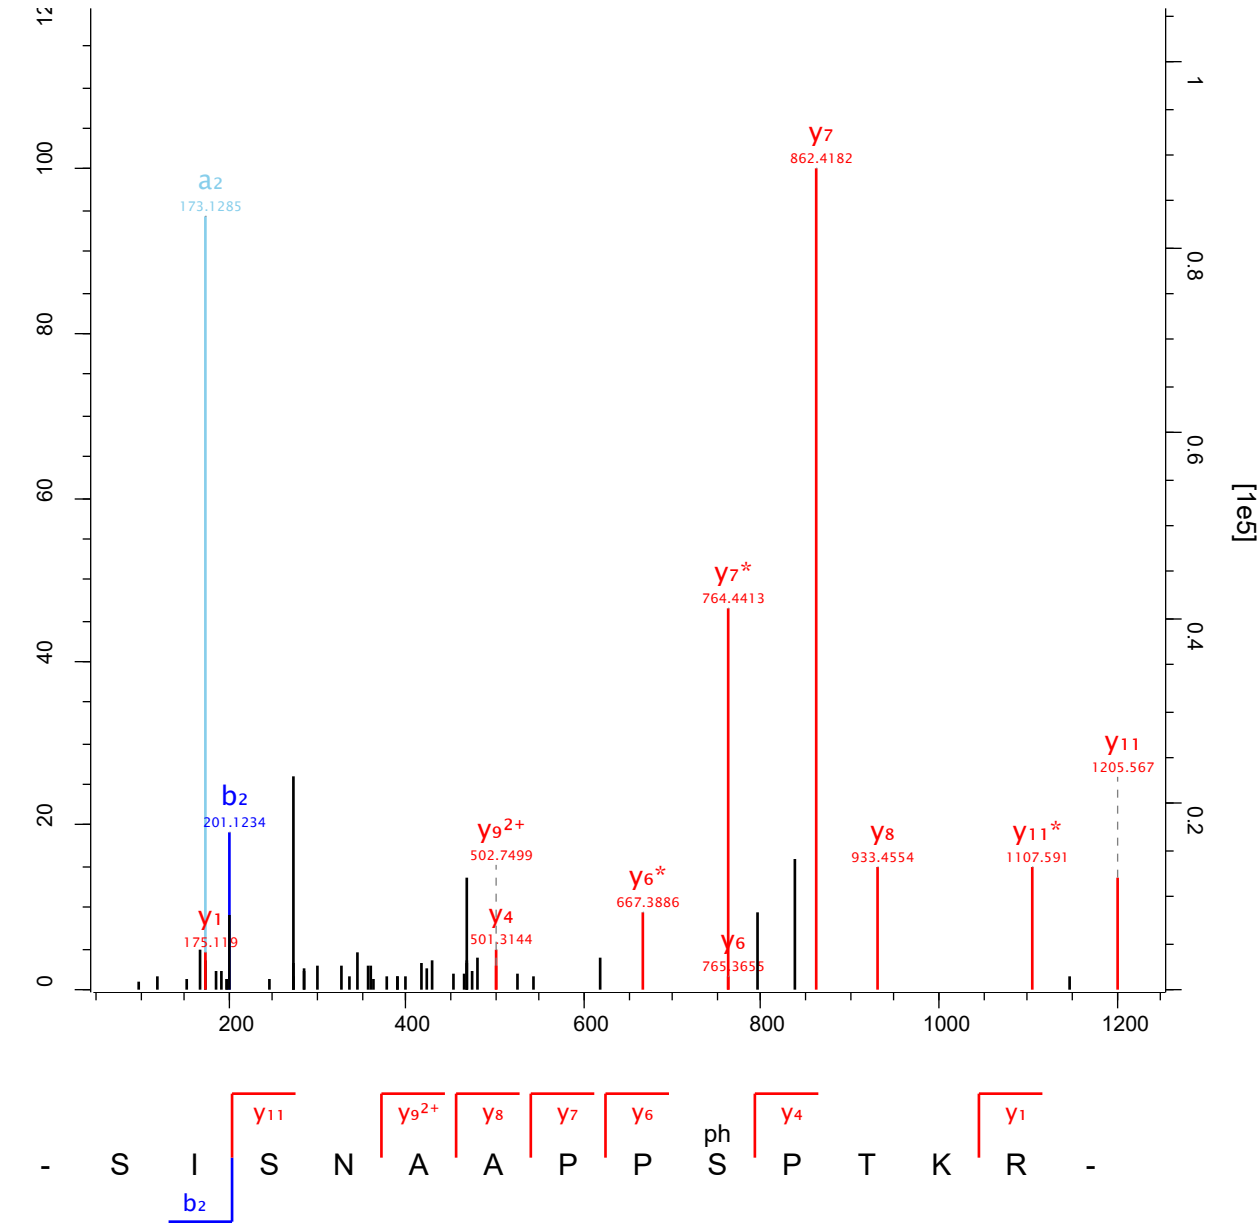

| Raw file | Scan | Method    | Score | m/z    |
|----------|------|-----------|-------|--------|
| sys_02_2 | 4860 | FTMS; HCD | 50.09 | 617.79 |

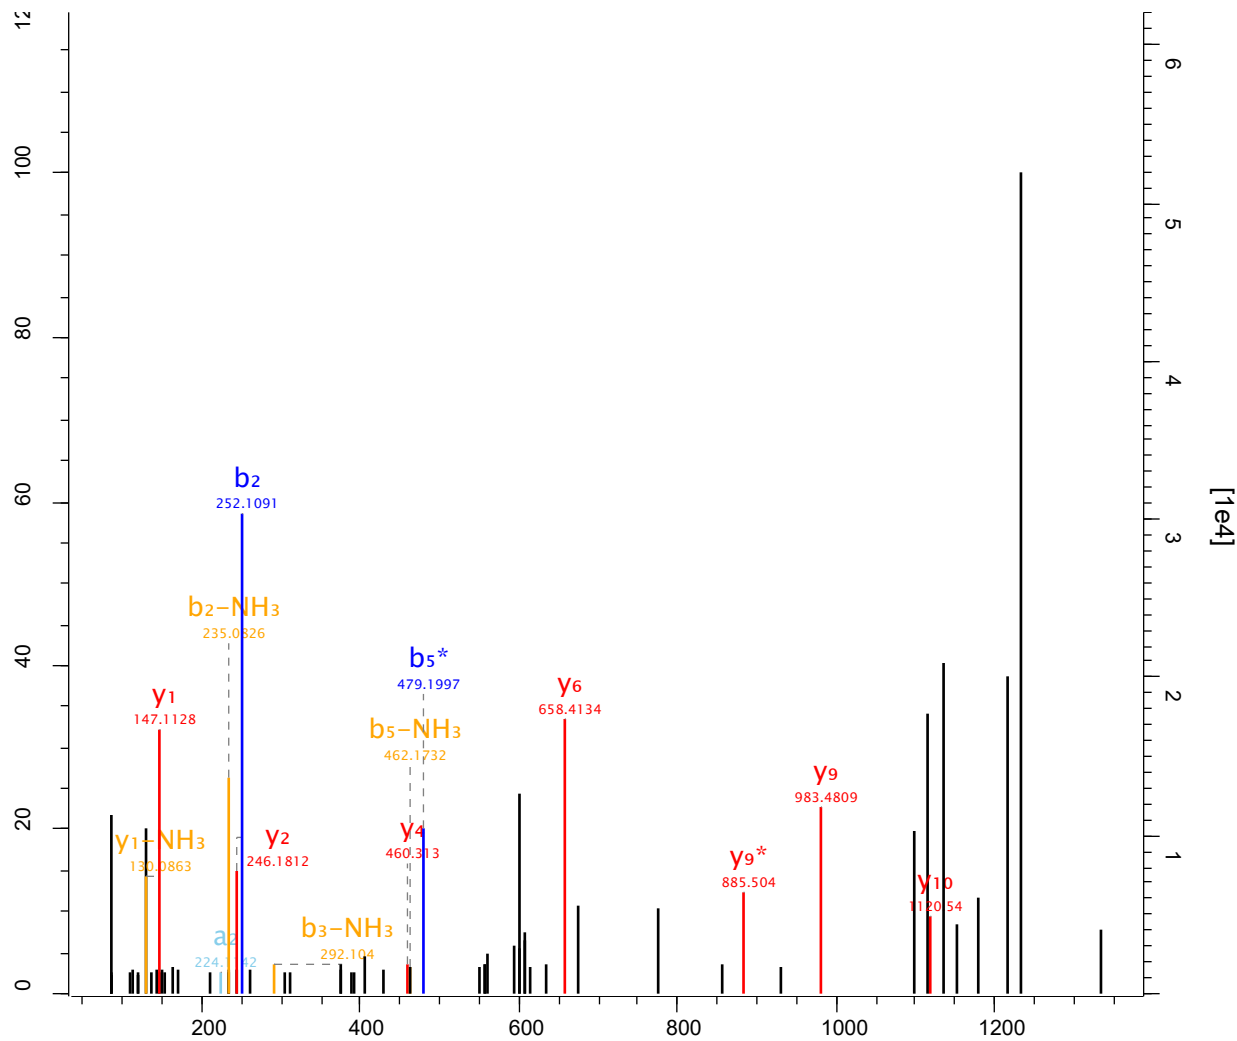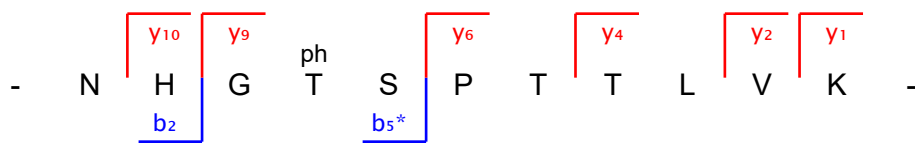

| Raw file | Scan | Method    | Score | m/z    |
|----------|------|-----------|-------|--------|
| sys_02_2 | 4927 | FTMS; HCD | 64.64 | 471.21 |

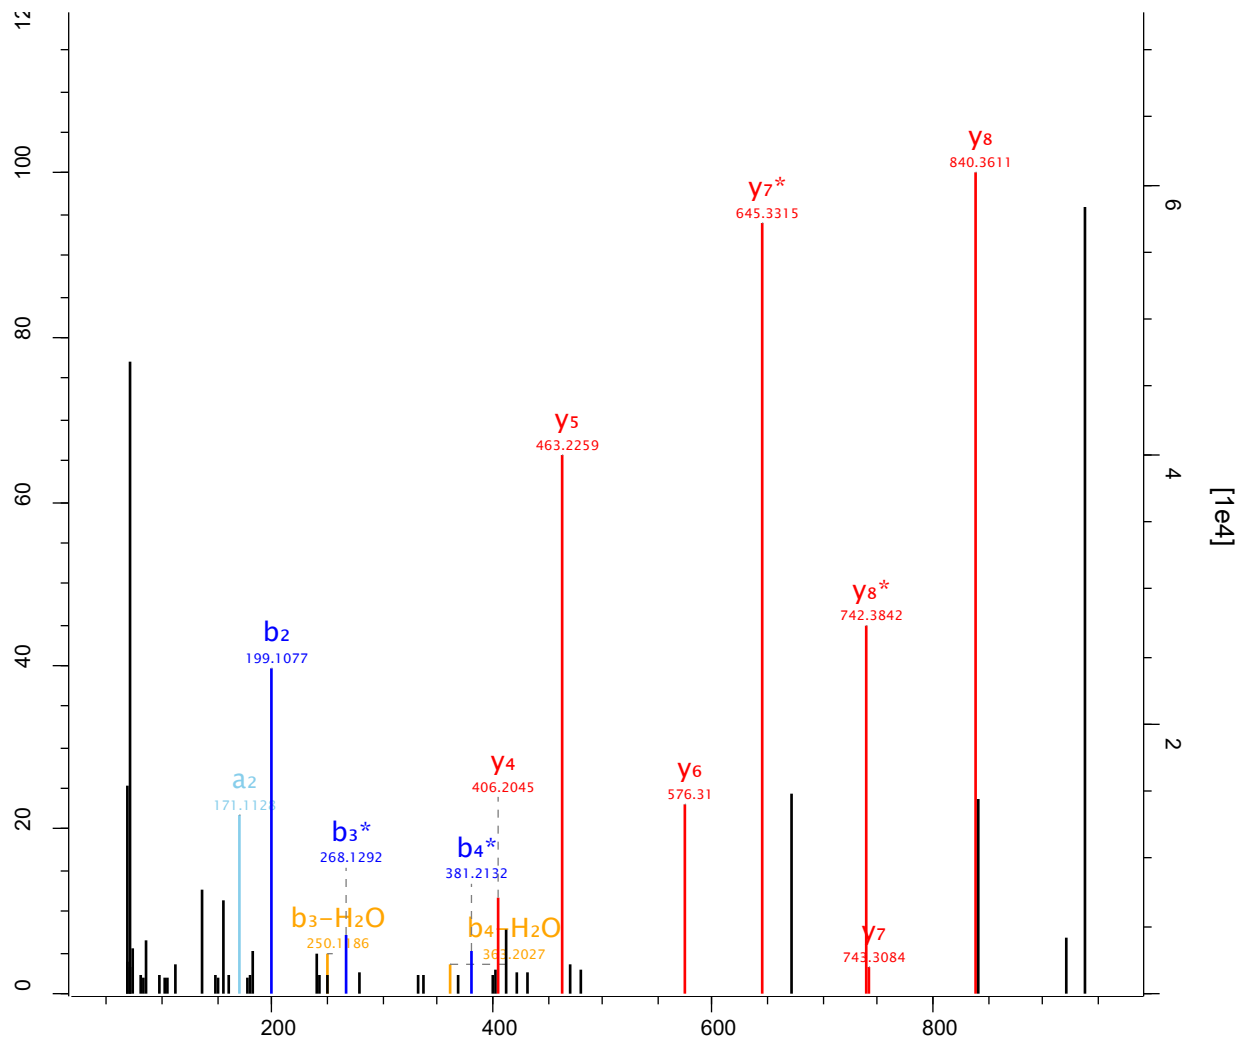

- T P S L G G S S R -

y8
y7  
ph
y6
y5
y4

b2
b3\*
b4\*

Raw file Scan Method Score m/z  
 sys\_02\_2 4994 FTMS; HCD 95.85 627.28

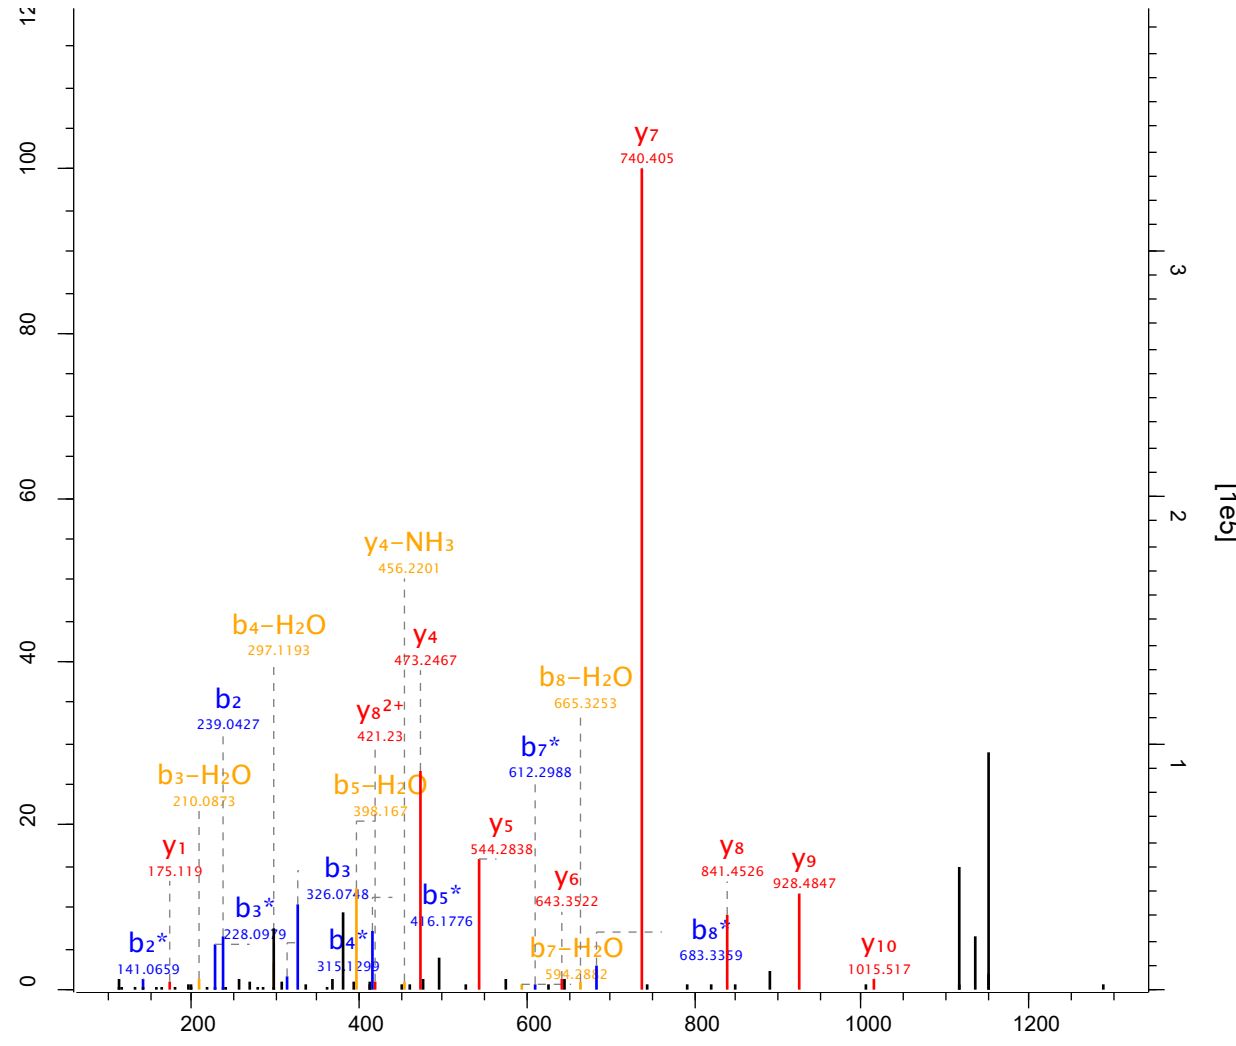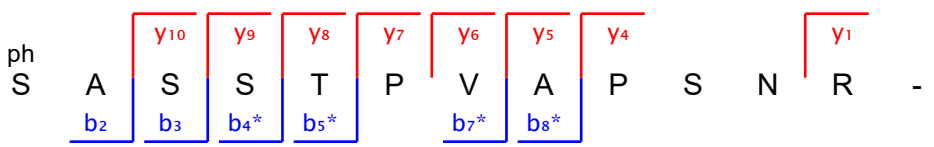

Raw file Scan Method Score m/z  
 sys\_02\_2 5046 FTMS; HCD 155.49 879.86

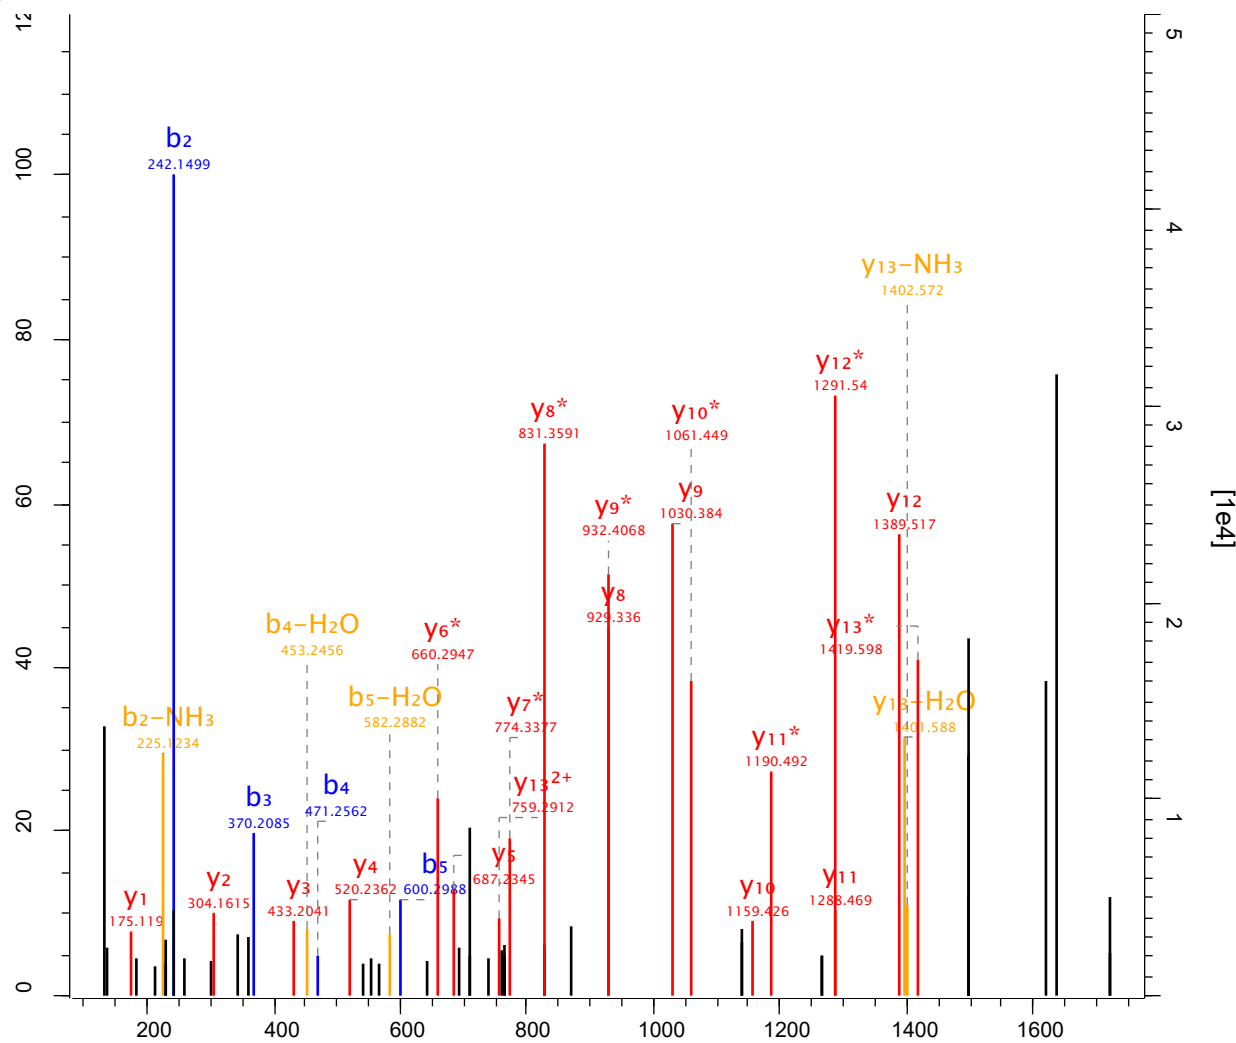

- L Q Q T E E T G N A S S E E R  
 - b2 b3 b4 b5  
 - y13\* y12 y11 y10 y9 y8 y7\* y6\* y5 ph y4 y3 y2 y1

Raw file Scan Method Score m/z  
 sys\_02\_2 5120 FTMS; HCD 43.21 600.59

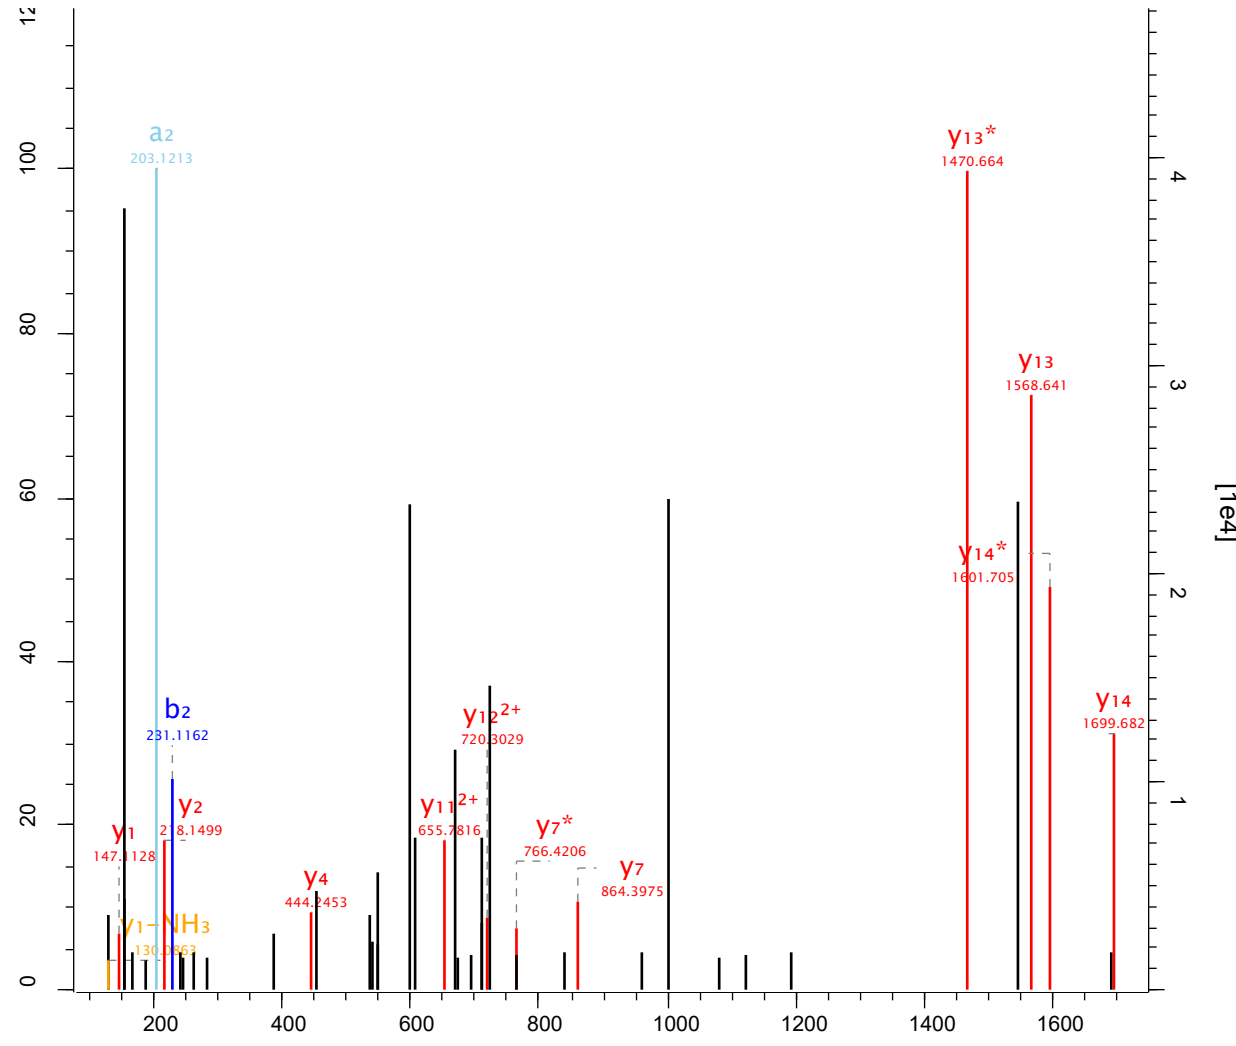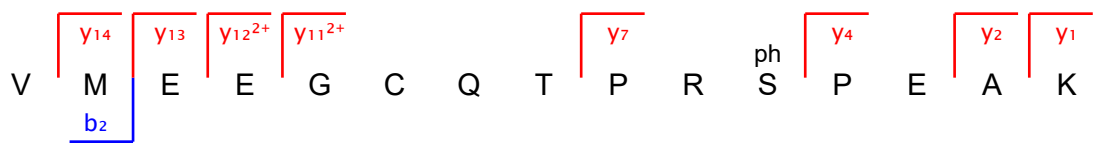



Raw file Scan Method Score m/z  
 sys\_02\_2 5166 FTMS; HCD 77.64 569.25

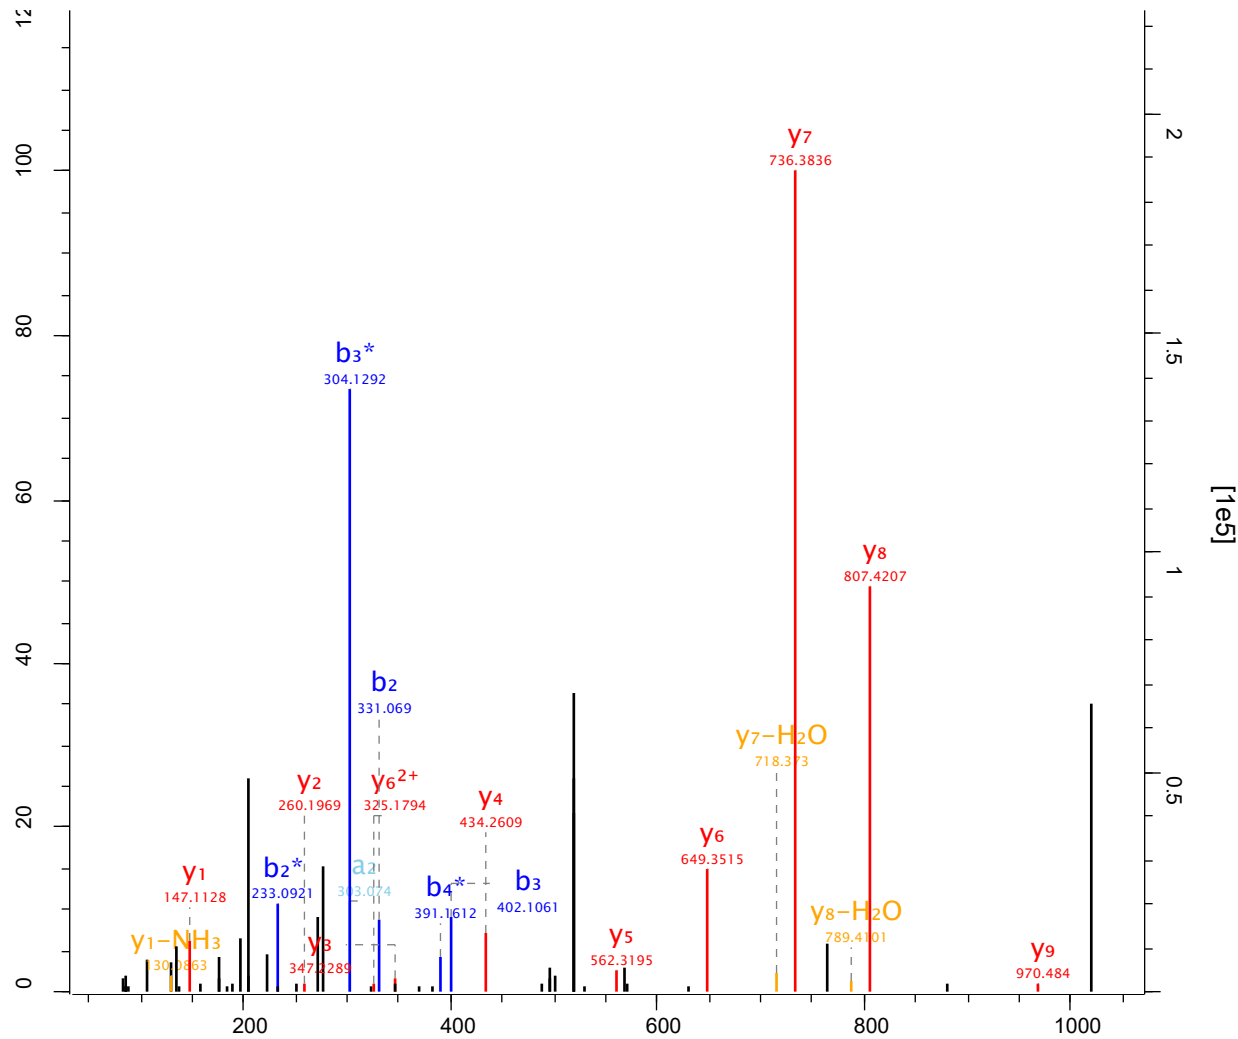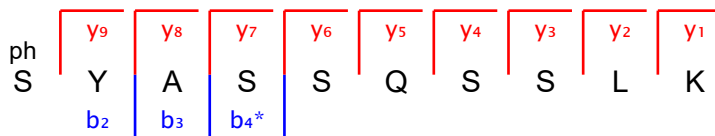

Raw file Scan Method Score m/z  
 sys\_02\_2 5203 FTMS; HCD 71.98 659.29

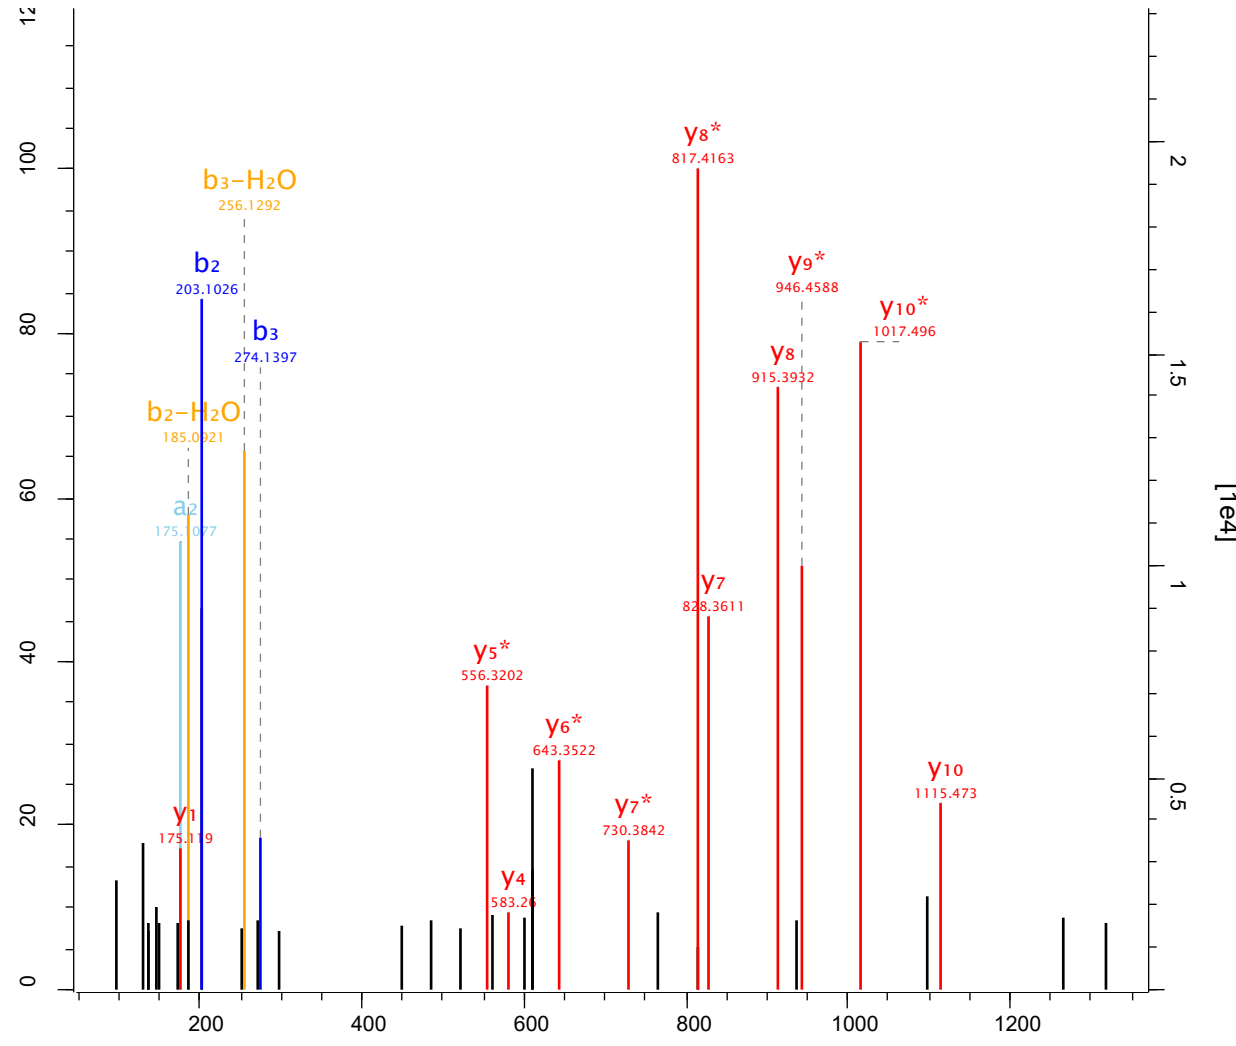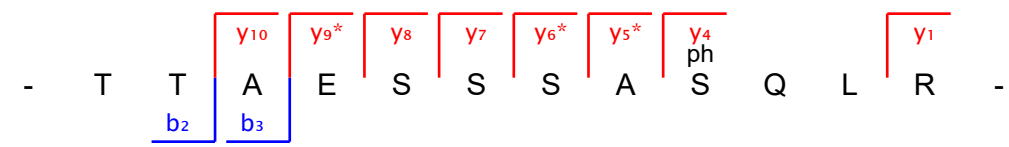

| Raw file | Scan | Method    | Score | m/z    |
|----------|------|-----------|-------|--------|
| sys_02_2 | 5210 | FTMS; HCD | 40.28 | 628.79 |

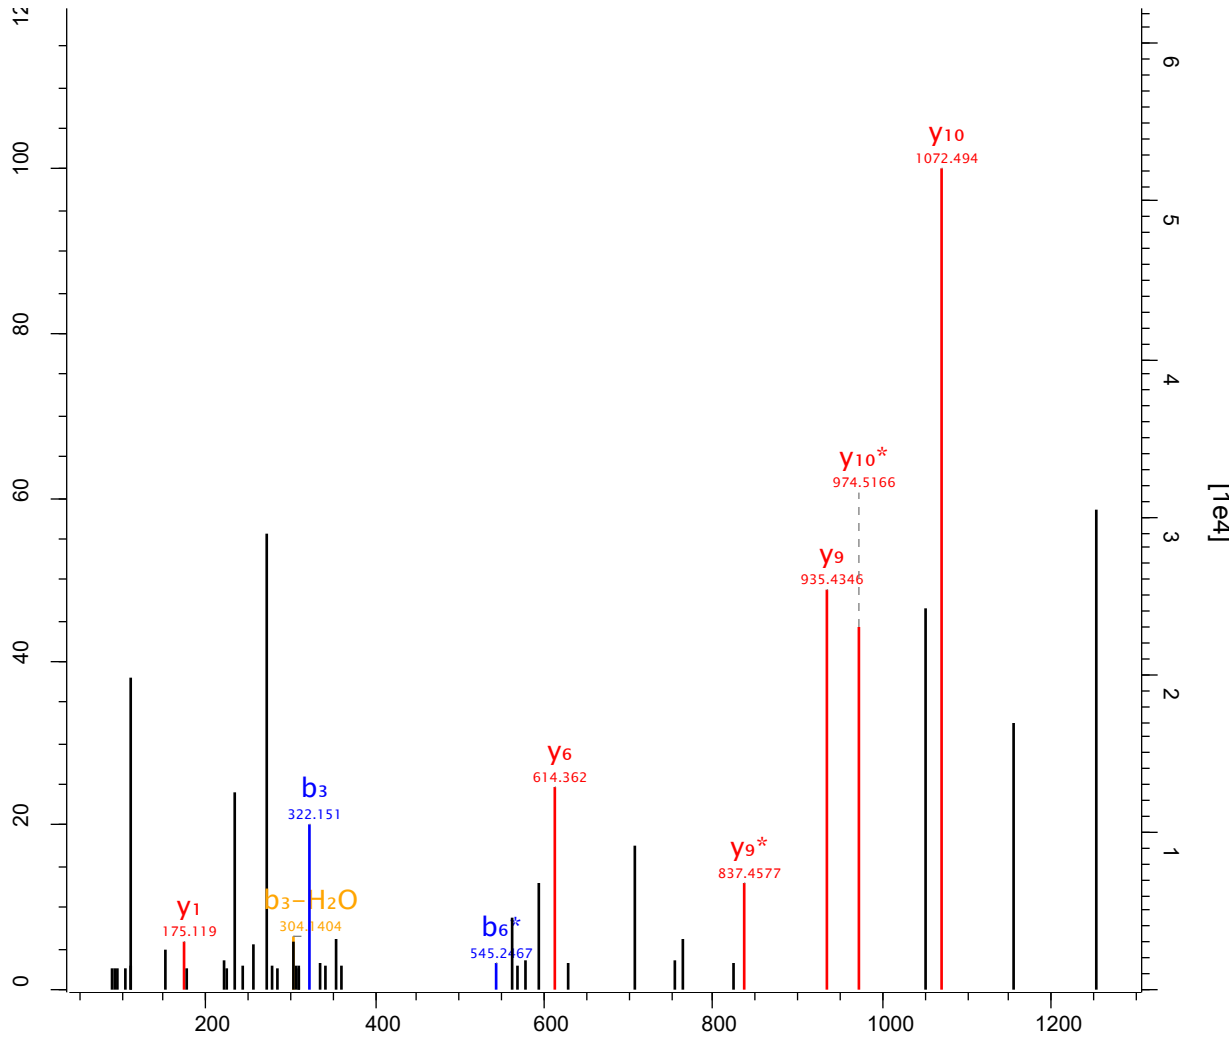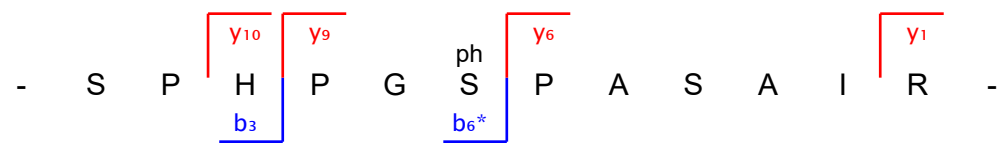

Raw file Scan Method Score m/z  
 sys\_02\_2 5409 FTMS; HCD 143.57 834.34

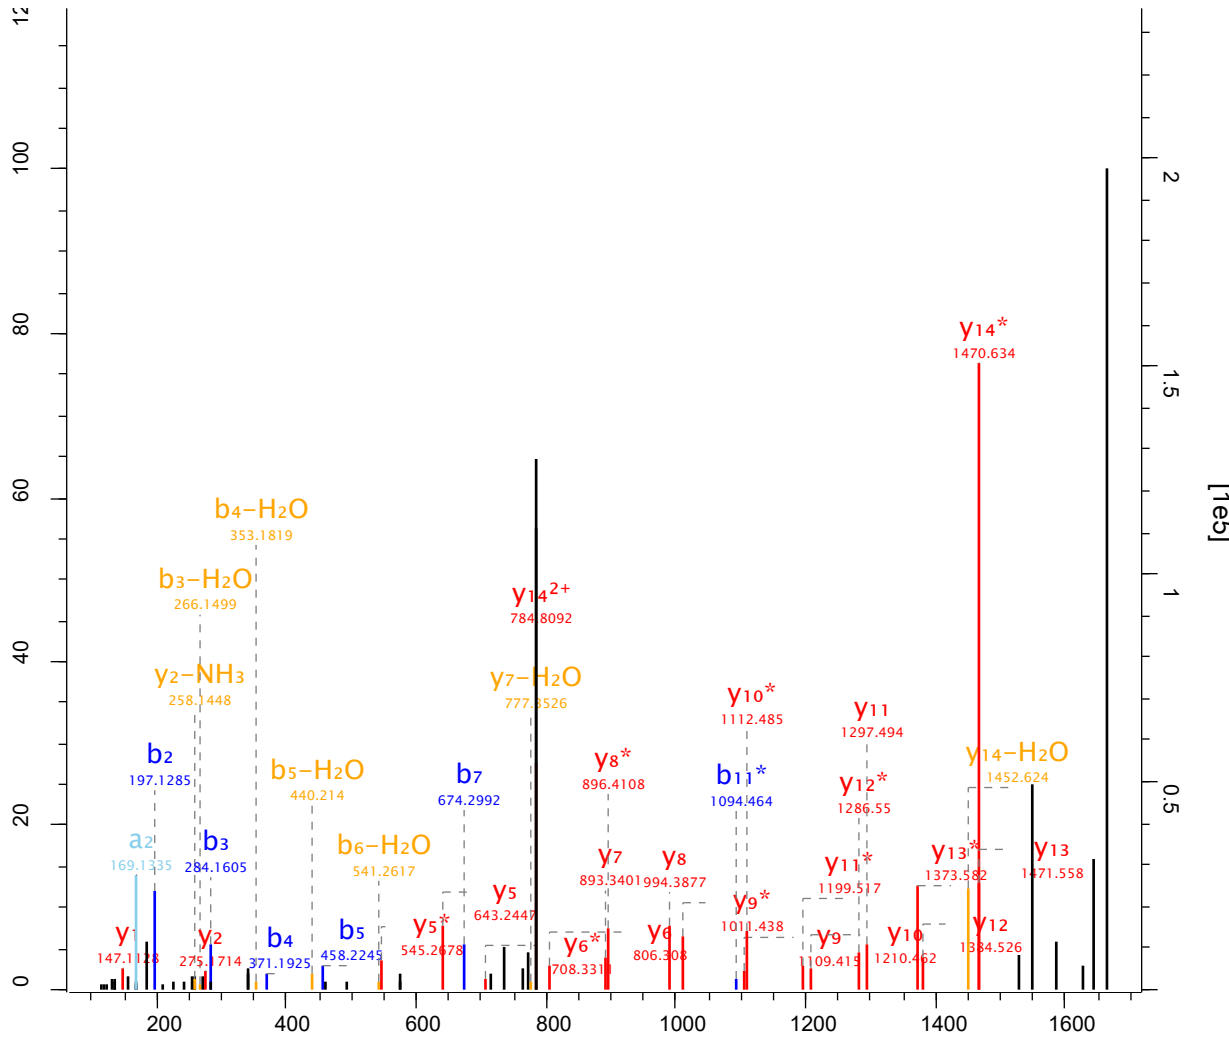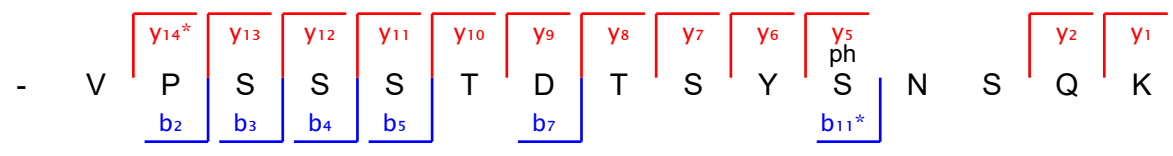

| Raw file | Scan | Method    | Score | m/z    |
|----------|------|-----------|-------|--------|
| sys_02_2 | 5443 | FTMS; HCD | 52.25 | 588.22 |

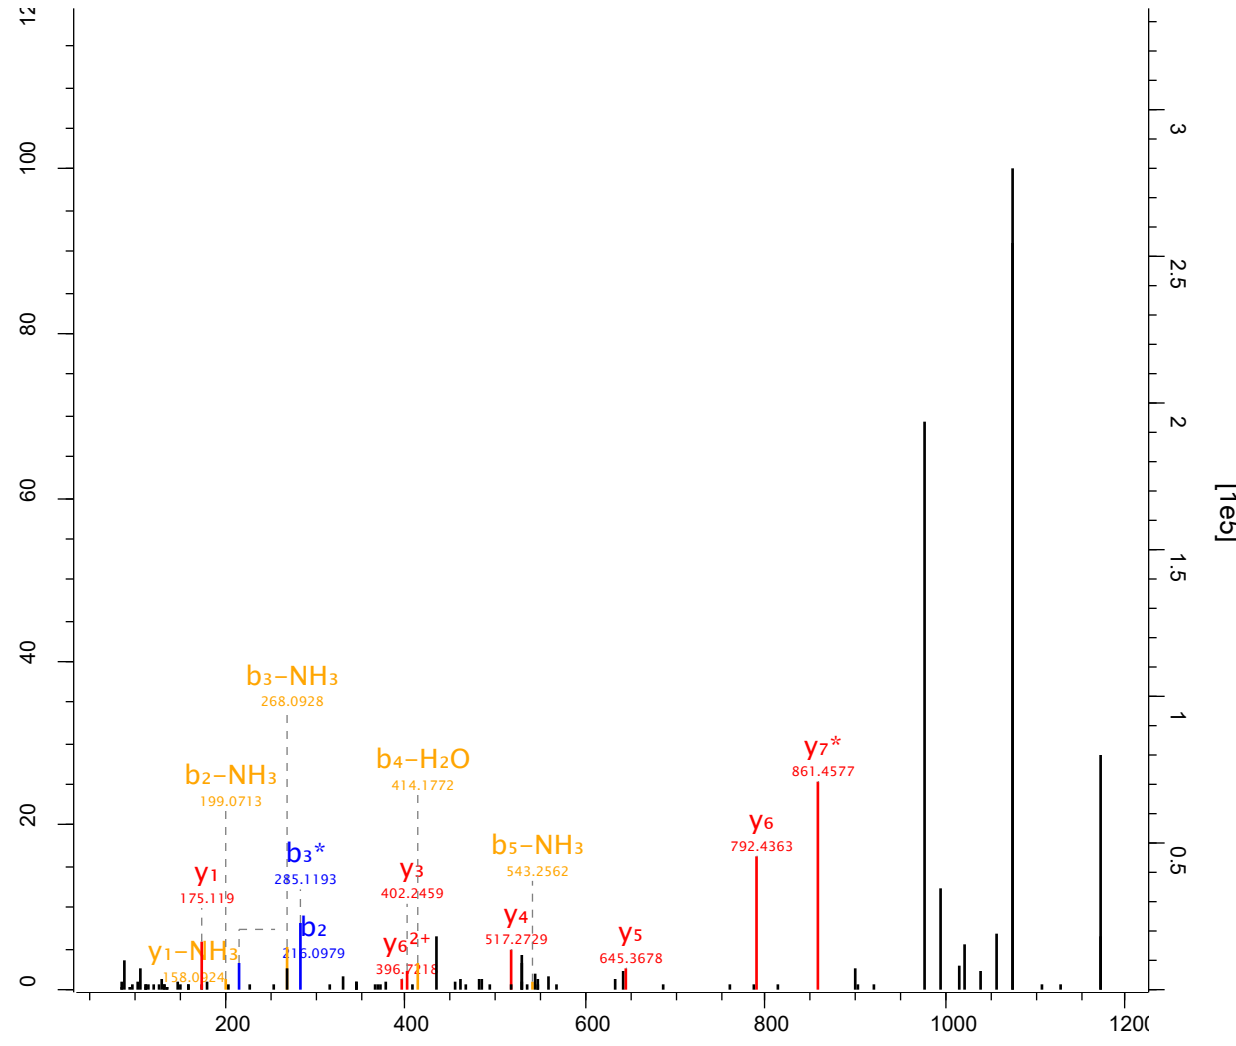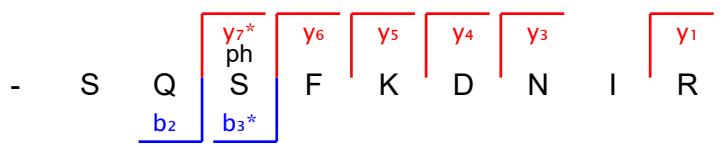

Raw file Scan Method Score m/z  
 sys\_02\_2 5469 FTMS; HCD 211.9 713.33

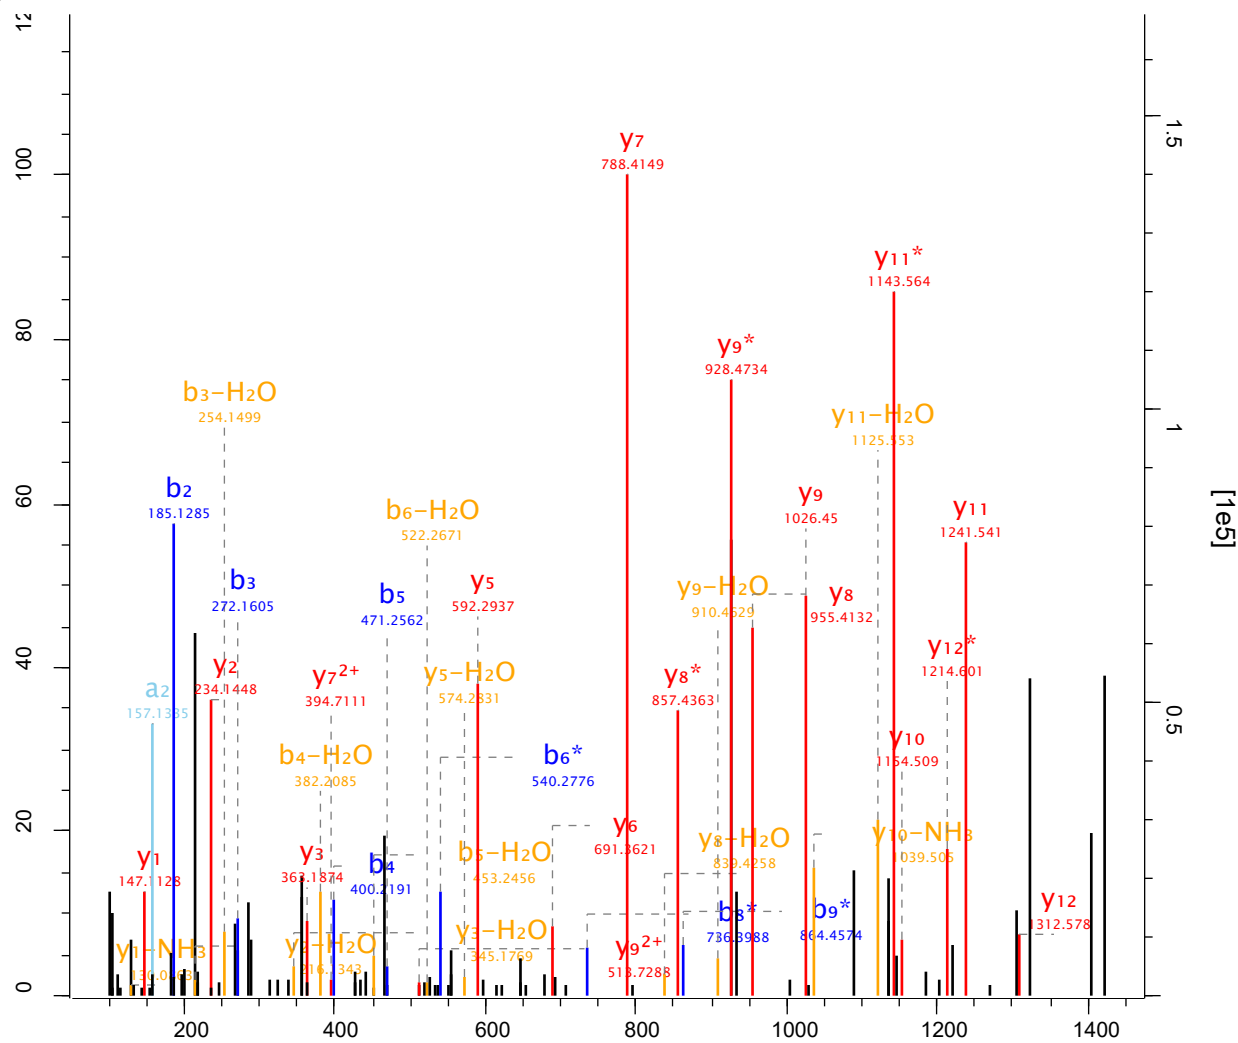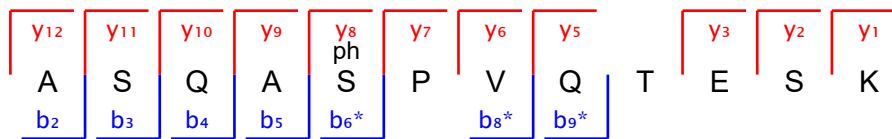

Raw file Scan Method Score m/z  
 sys\_02\_2 5475 FTMS; HCD 58.32 400.86

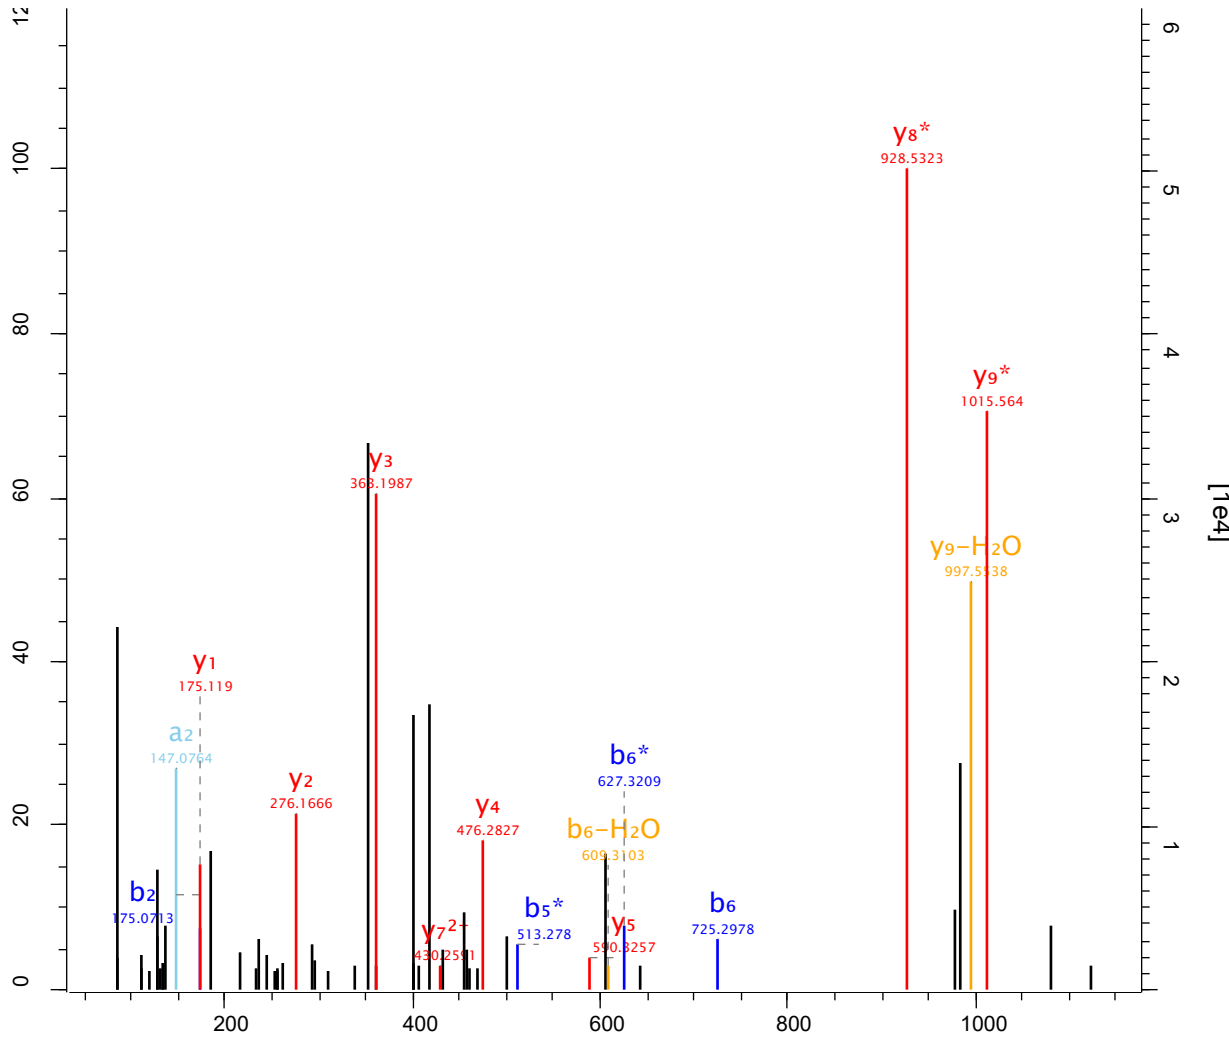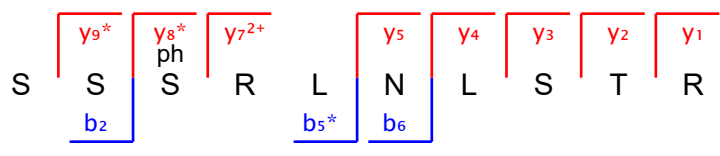





Raw file Scan Method Score m/z  
 sys\_02\_2 5622 FTMS; HCD 102.65 672.78

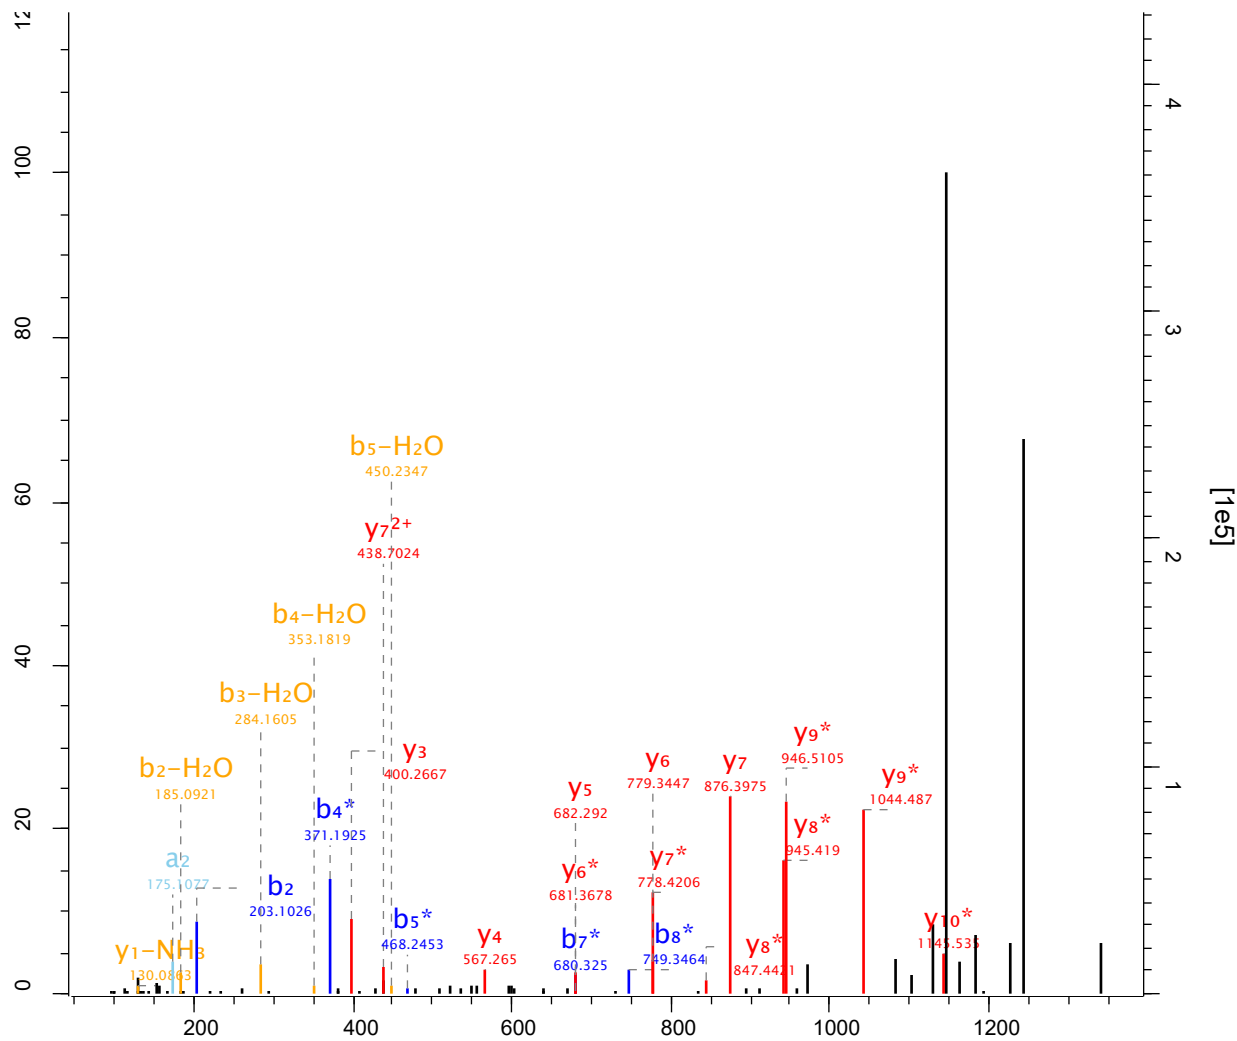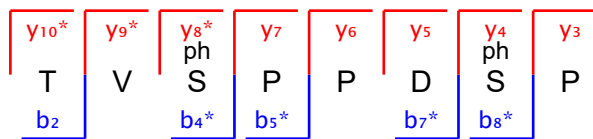

Raw file Scan Method Score m/z  
 sys\_02\_2 5766 FTMS; HCD 149.86 523.89

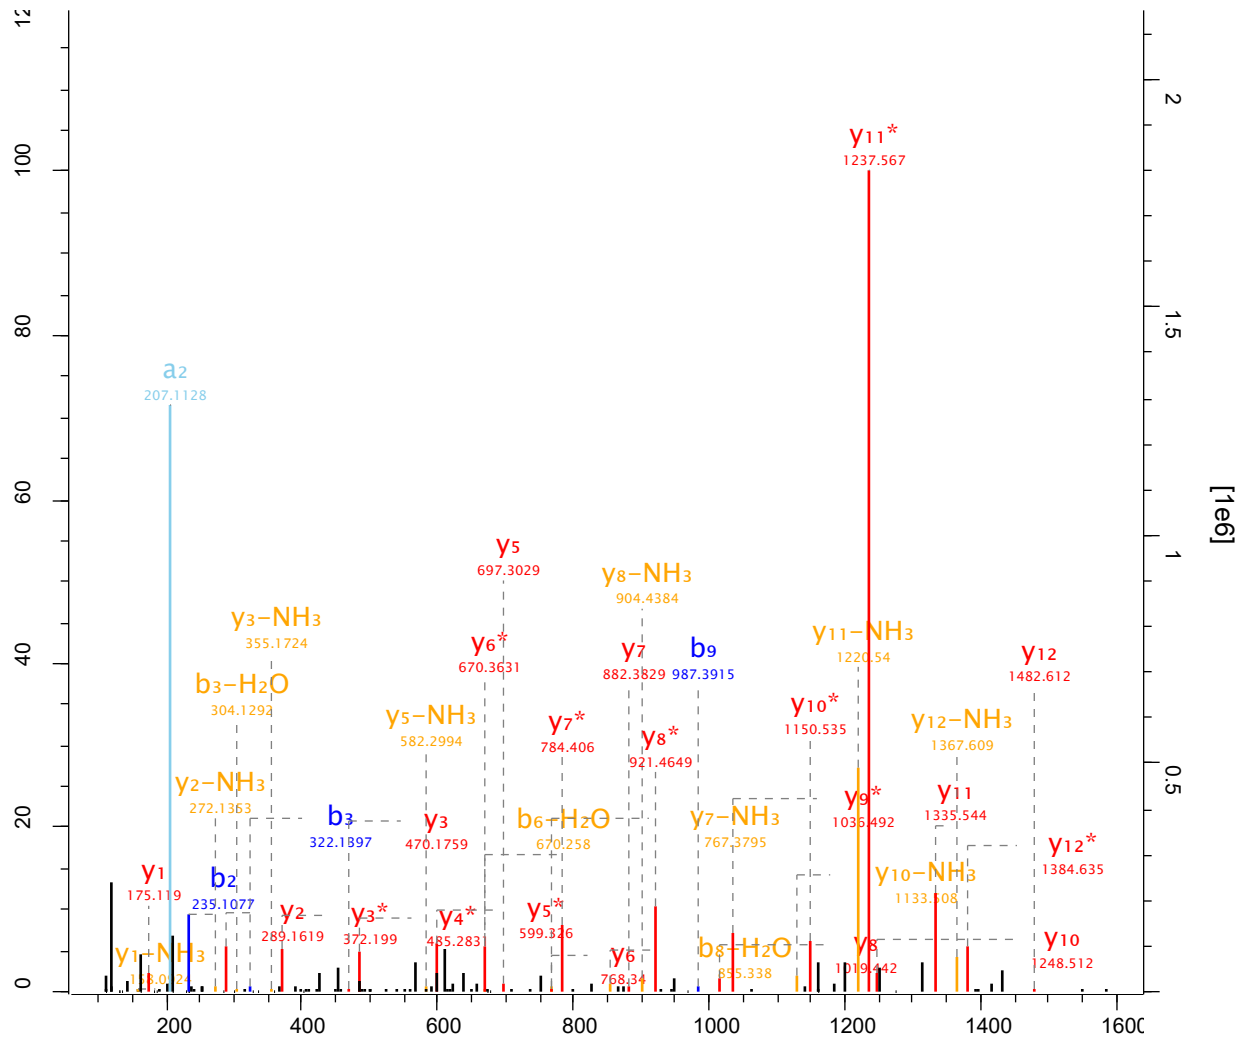

- S F S N D H N A N L T N R -

b<sub>2</sub>
b<sub>3</sub>
b<sub>9</sub>

y<sub>12</sub>
y<sub>11</sub>
y<sub>10</sub>
y<sub>9</sub>\*
y<sub>8</sub>
y<sub>7</sub>
y<sub>6</sub>
y<sub>5</sub>
y<sub>4</sub>\*
y<sub>3</sub>ph
y<sub>2</sub>
y<sub>1</sub>

| Raw file | Scan | Method    | Score | m/z    |
|----------|------|-----------|-------|--------|
| sys_02_2 | 5815 | FTMS; HCD | 74.96 | 457.22 |

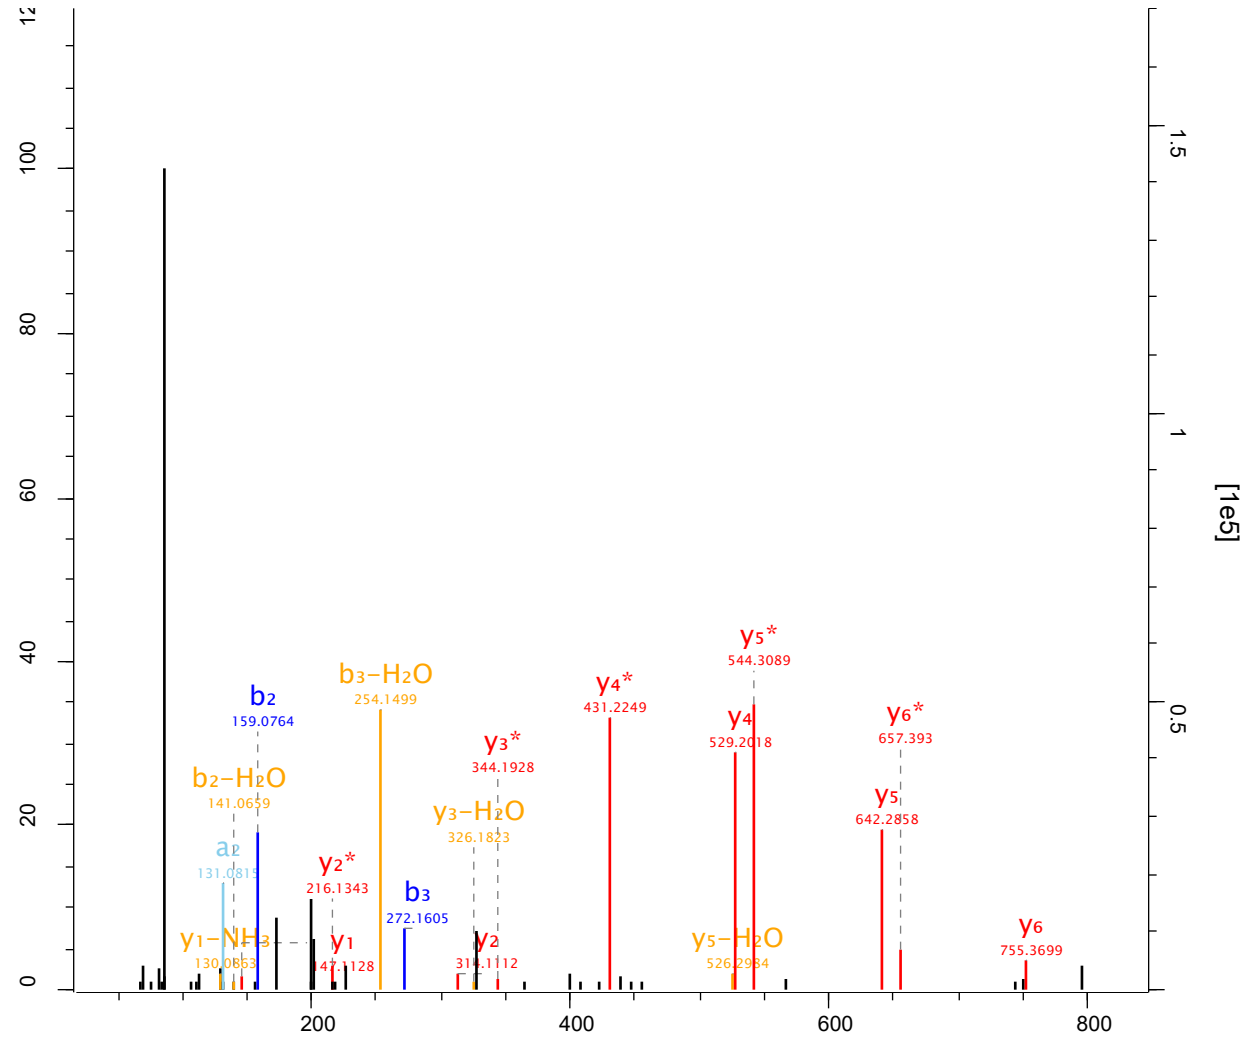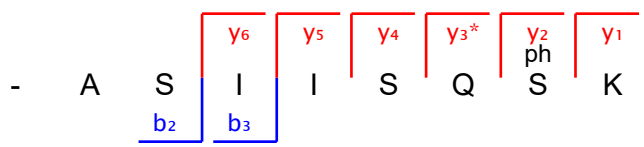

Raw file Scan Method Score m/z  
 sys\_02\_2 5846 FTMS; HCD 66 506.74

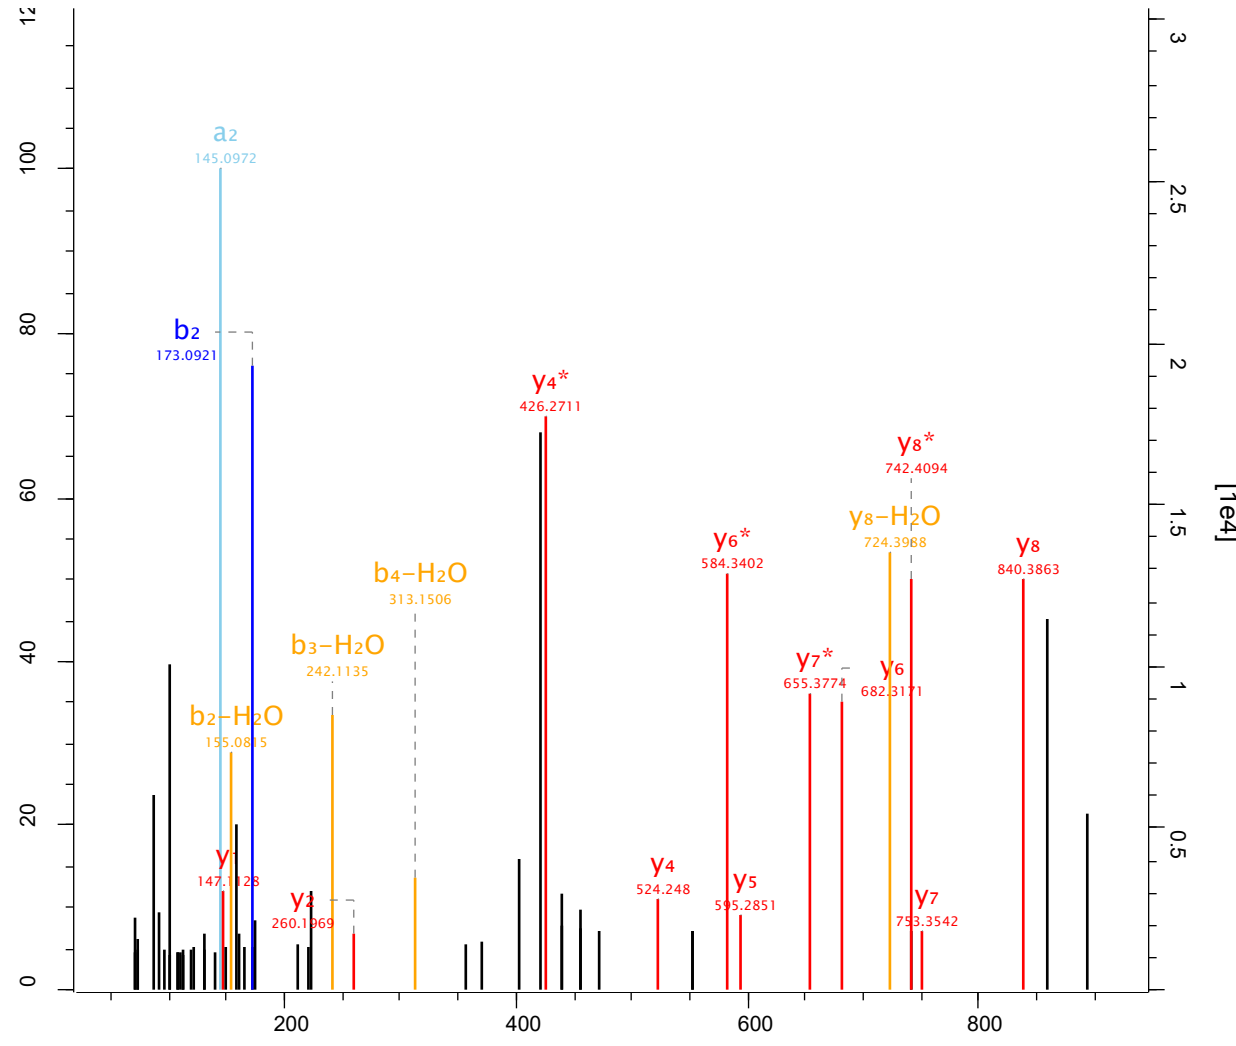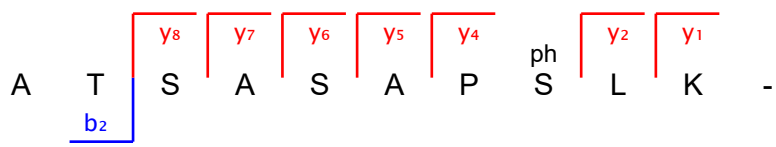

Raw file Scan Method Score m/z  
 sys\_02\_2 5899 FTMS; HCD 54.39 468.55

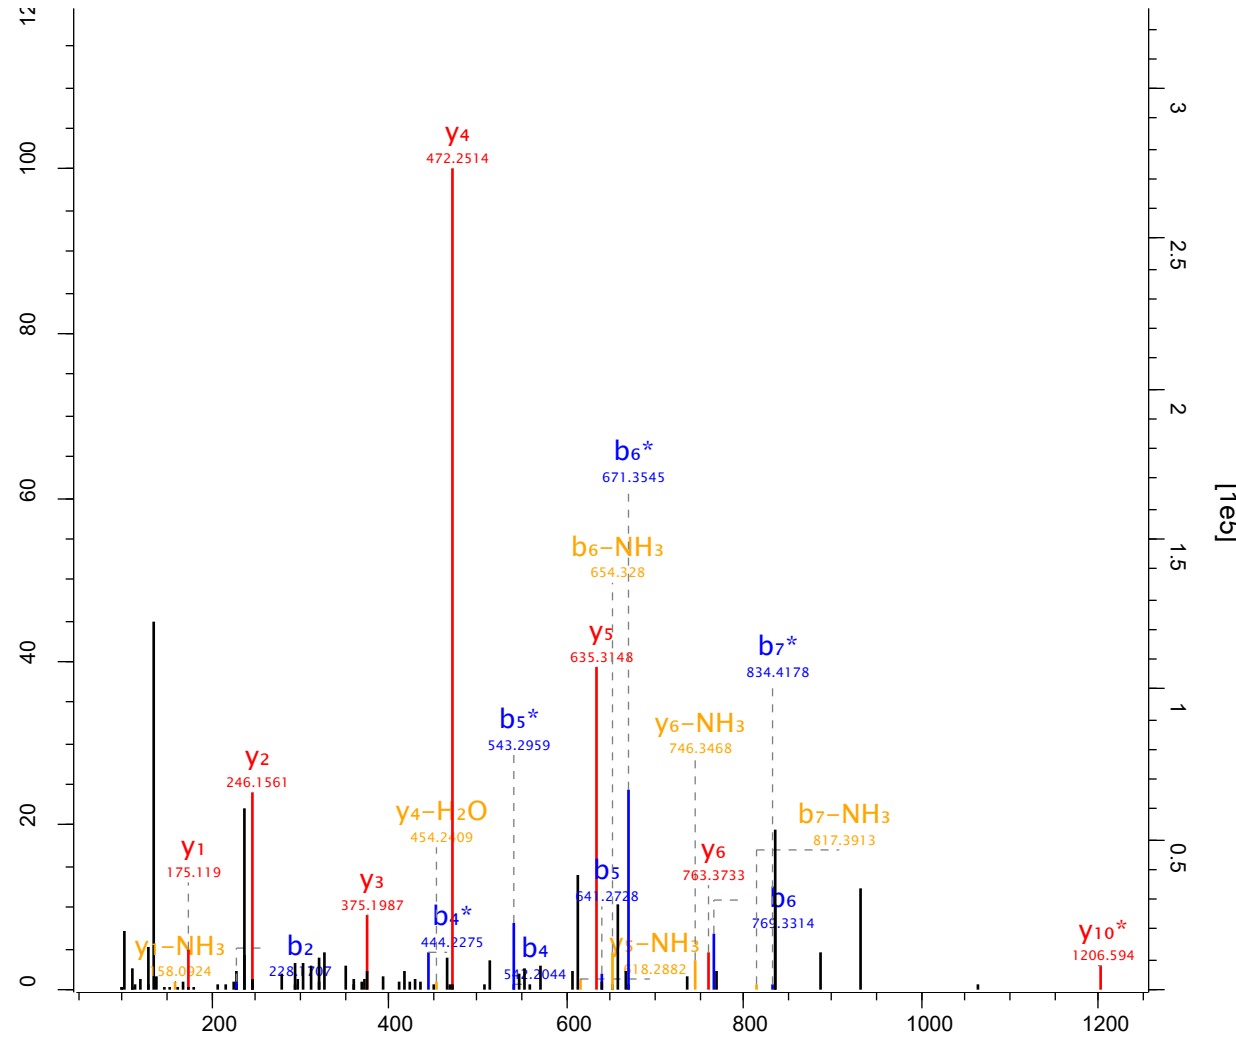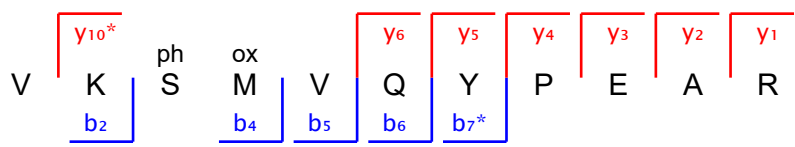

Raw file Scan Method Score m/z  
 sys\_02\_2 5935 FTMS; HCD 68.41 626.24

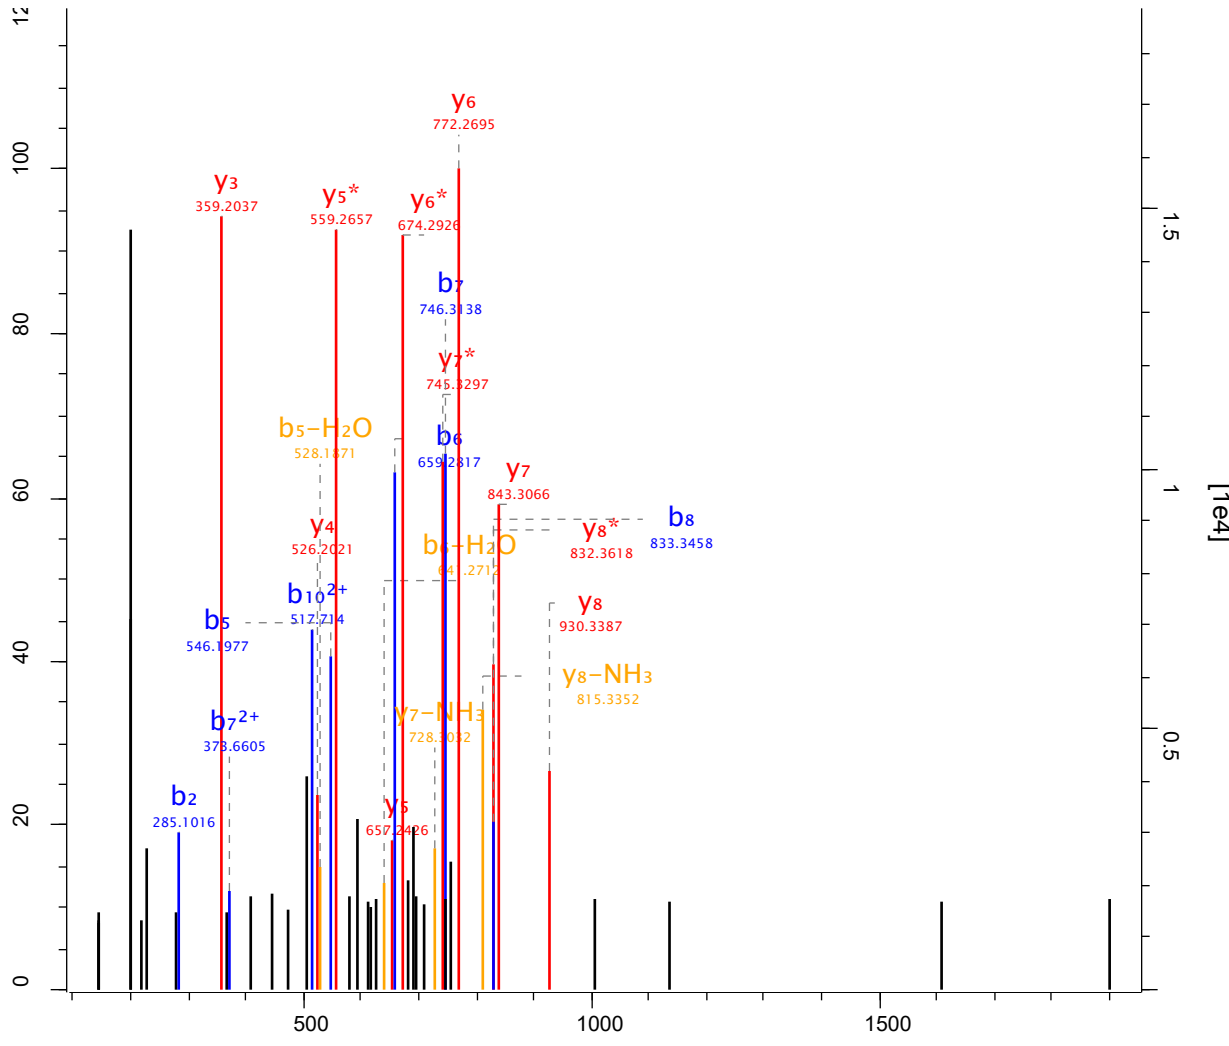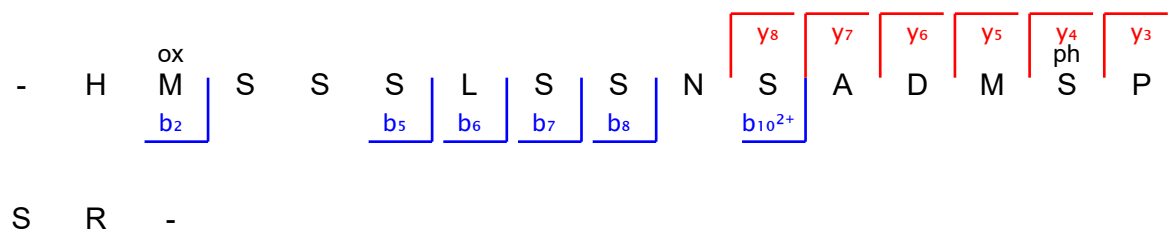

Raw file Scan Method Score m/z  
 sys\_02\_2 5954 FTMS; HCD 209.73 656.26

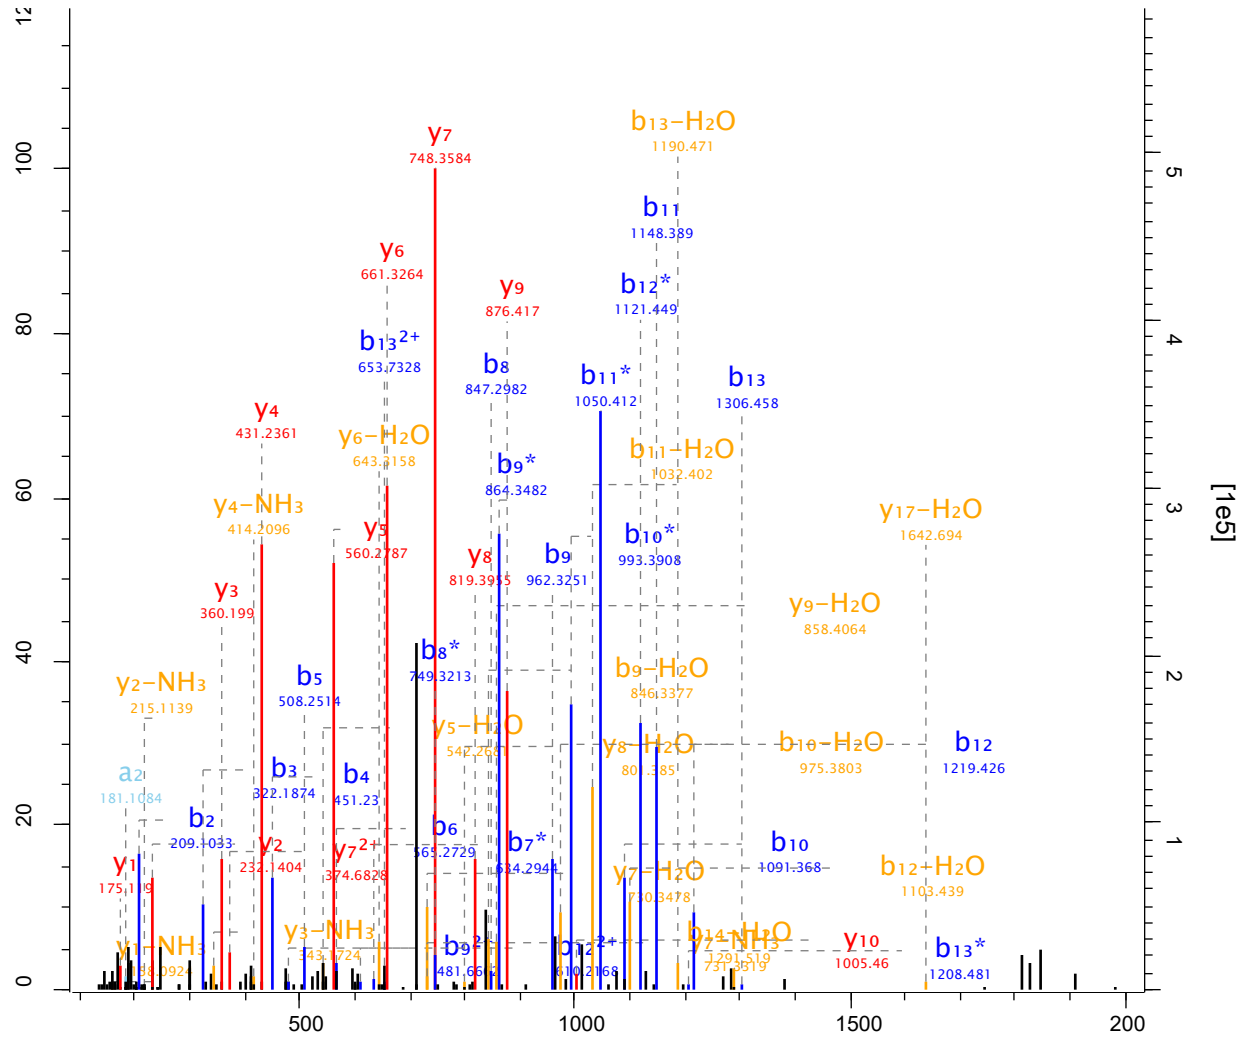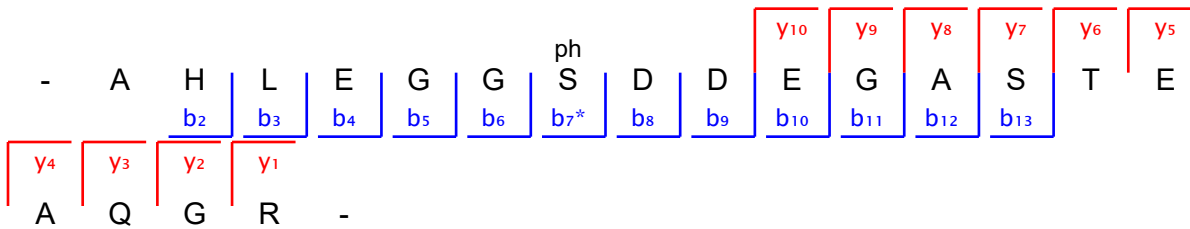

Raw file Scan Method Score m/z  
 sys\_02\_2 5982 FTMS; HCD 76.07 434.87

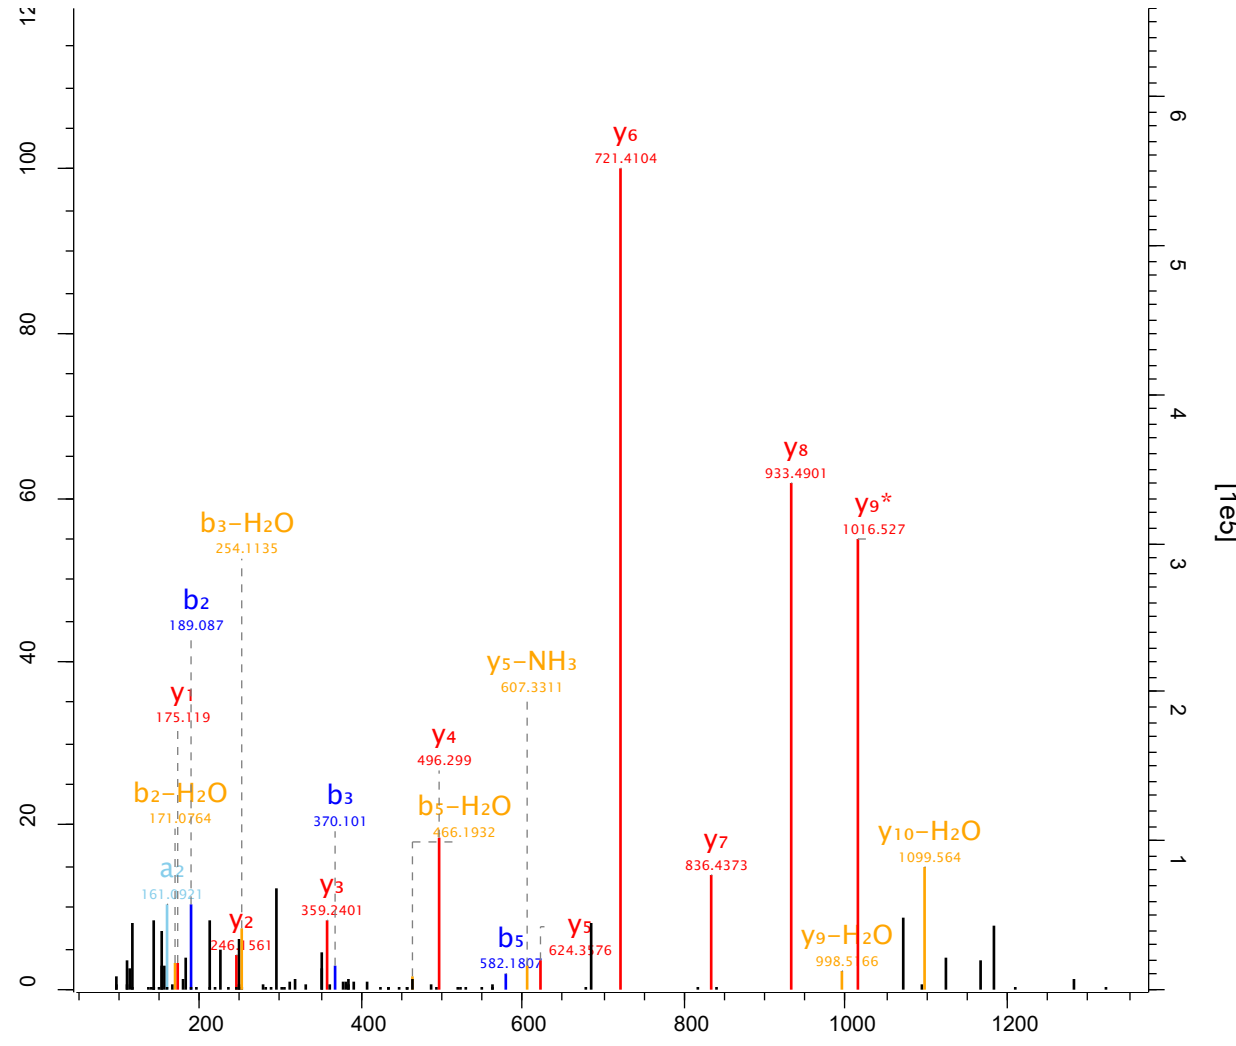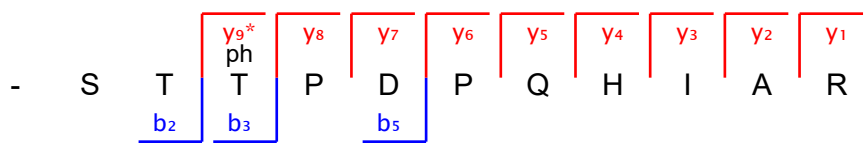



Raw file Scan Method Score m/z  
 sys\_02\_2 6039 FTMS; HCD 44.83 614.23

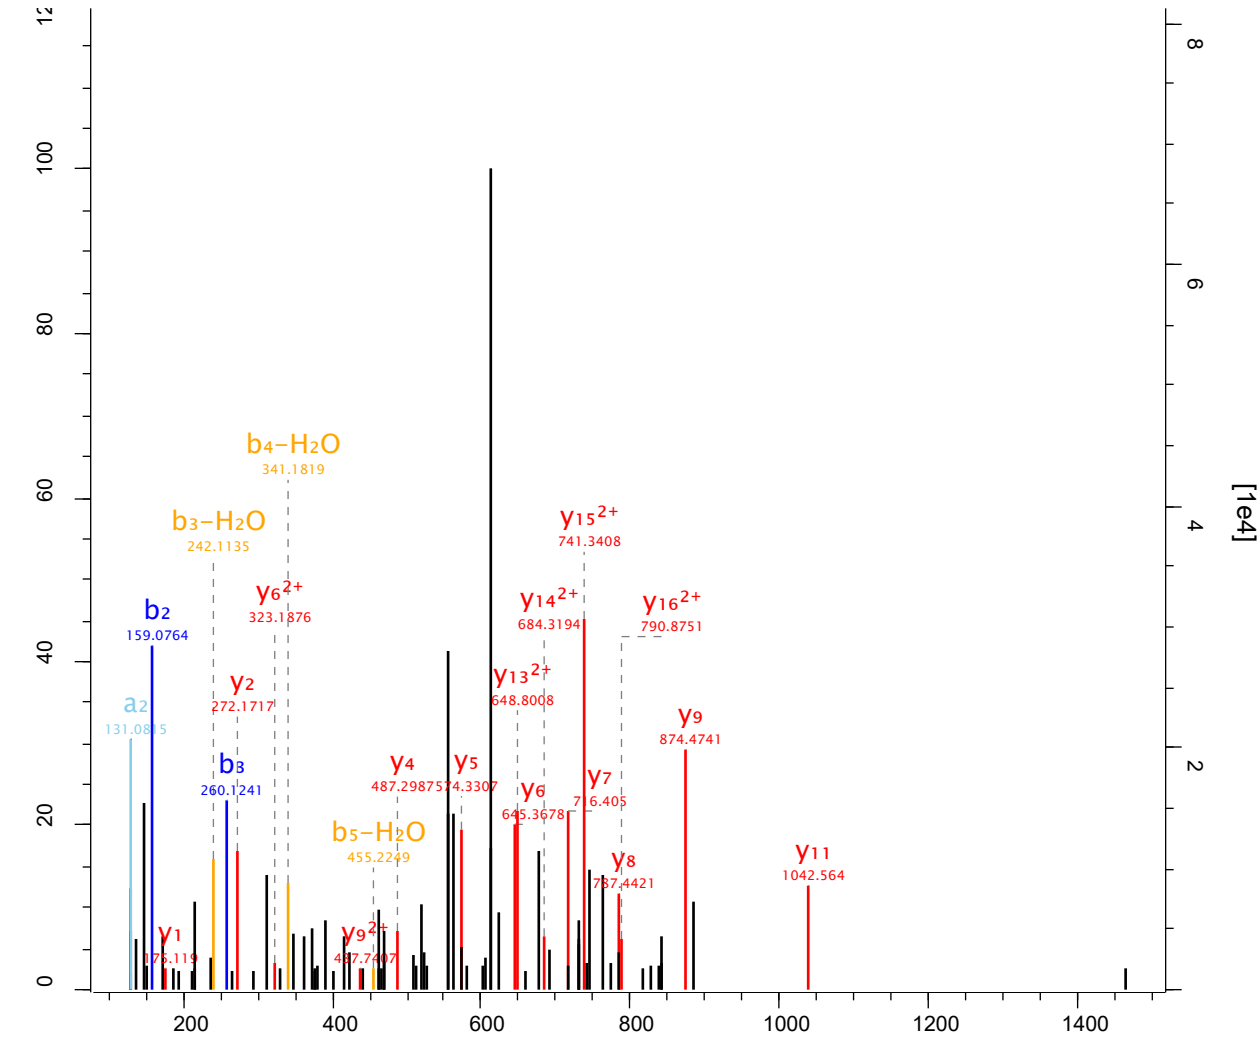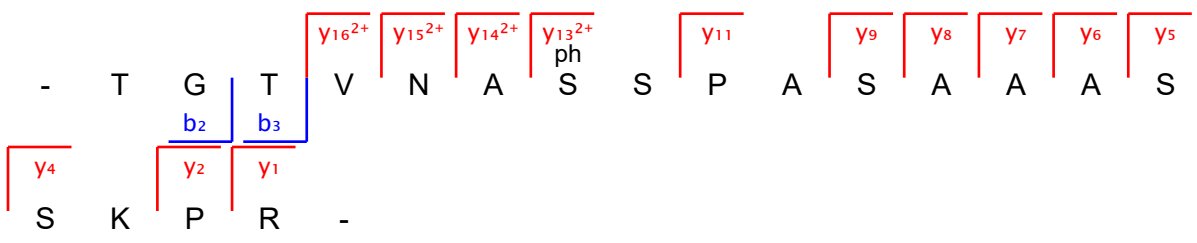

Raw file Scan Method Score m/z  
 sys\_02\_2 6086 FTMS; HCD 211.12 551.56

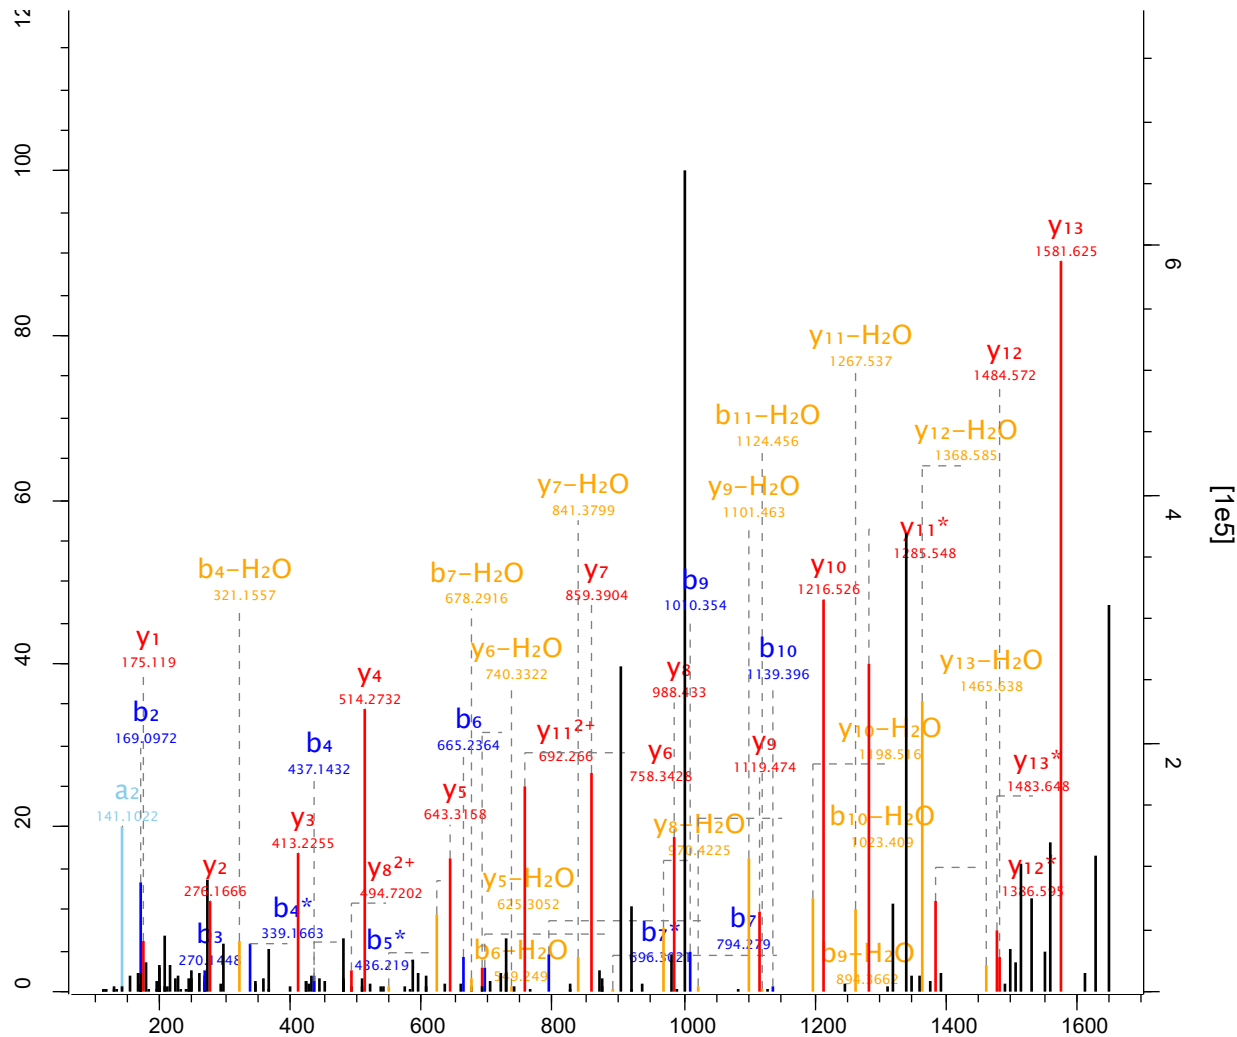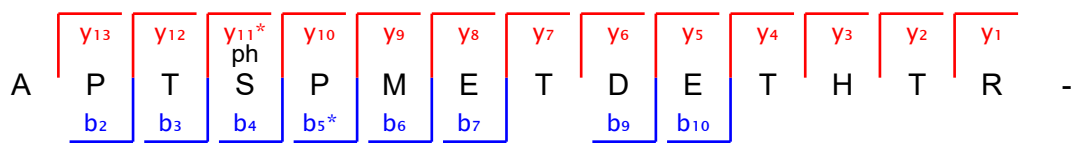

Raw file Scan Method Score m/z  
 sys\_02\_2 6103 FTMS; HCD 84.51 452.2

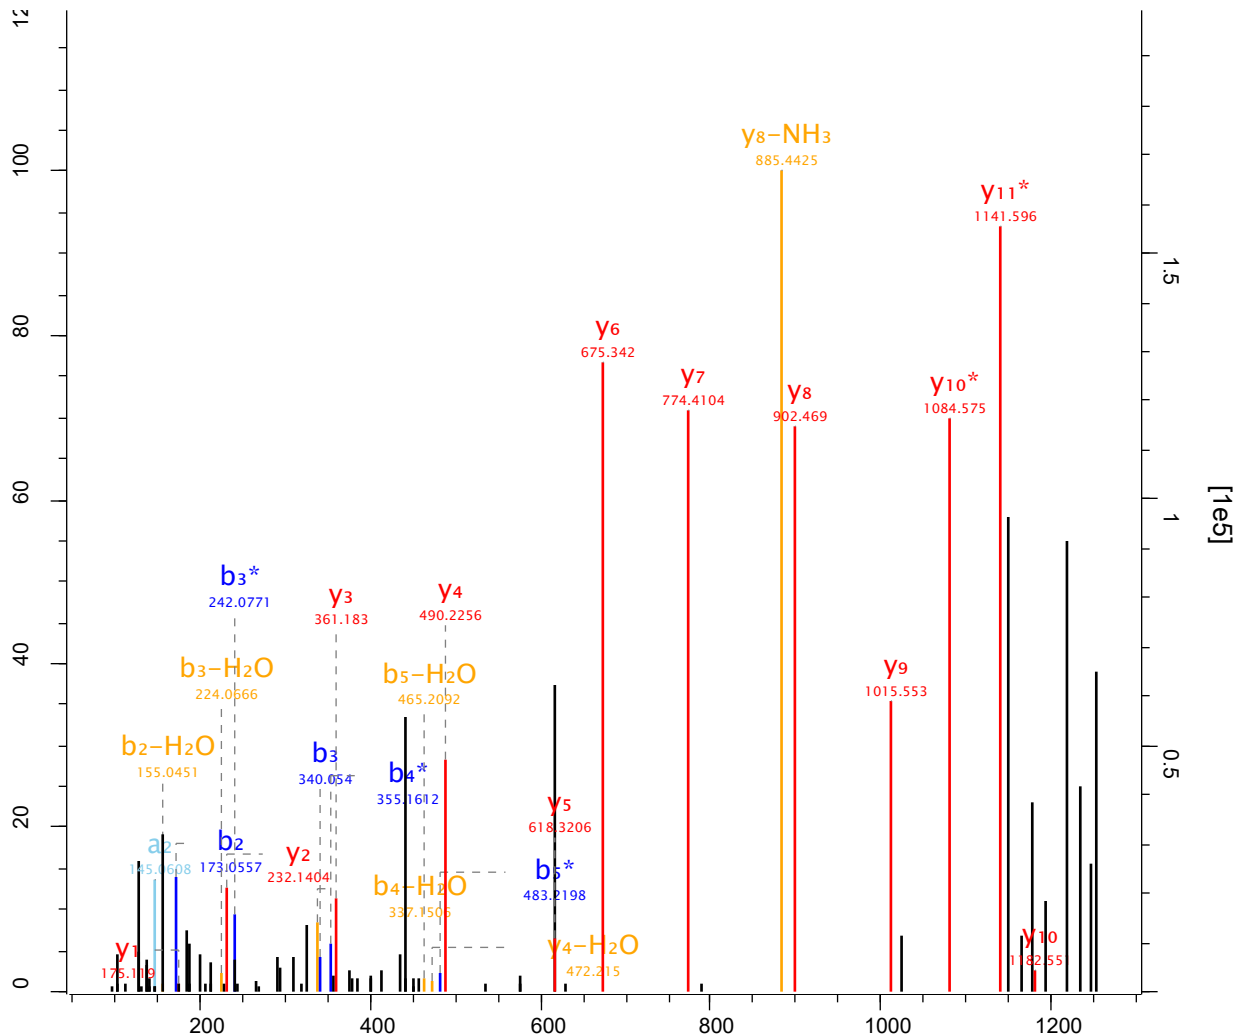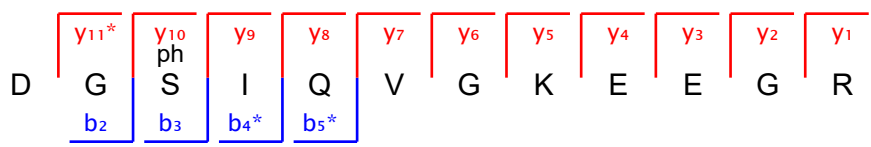

Raw file Scan Method Score m/z  
 sys\_02\_2 6193 FTMS; HCD 159.75 632.63

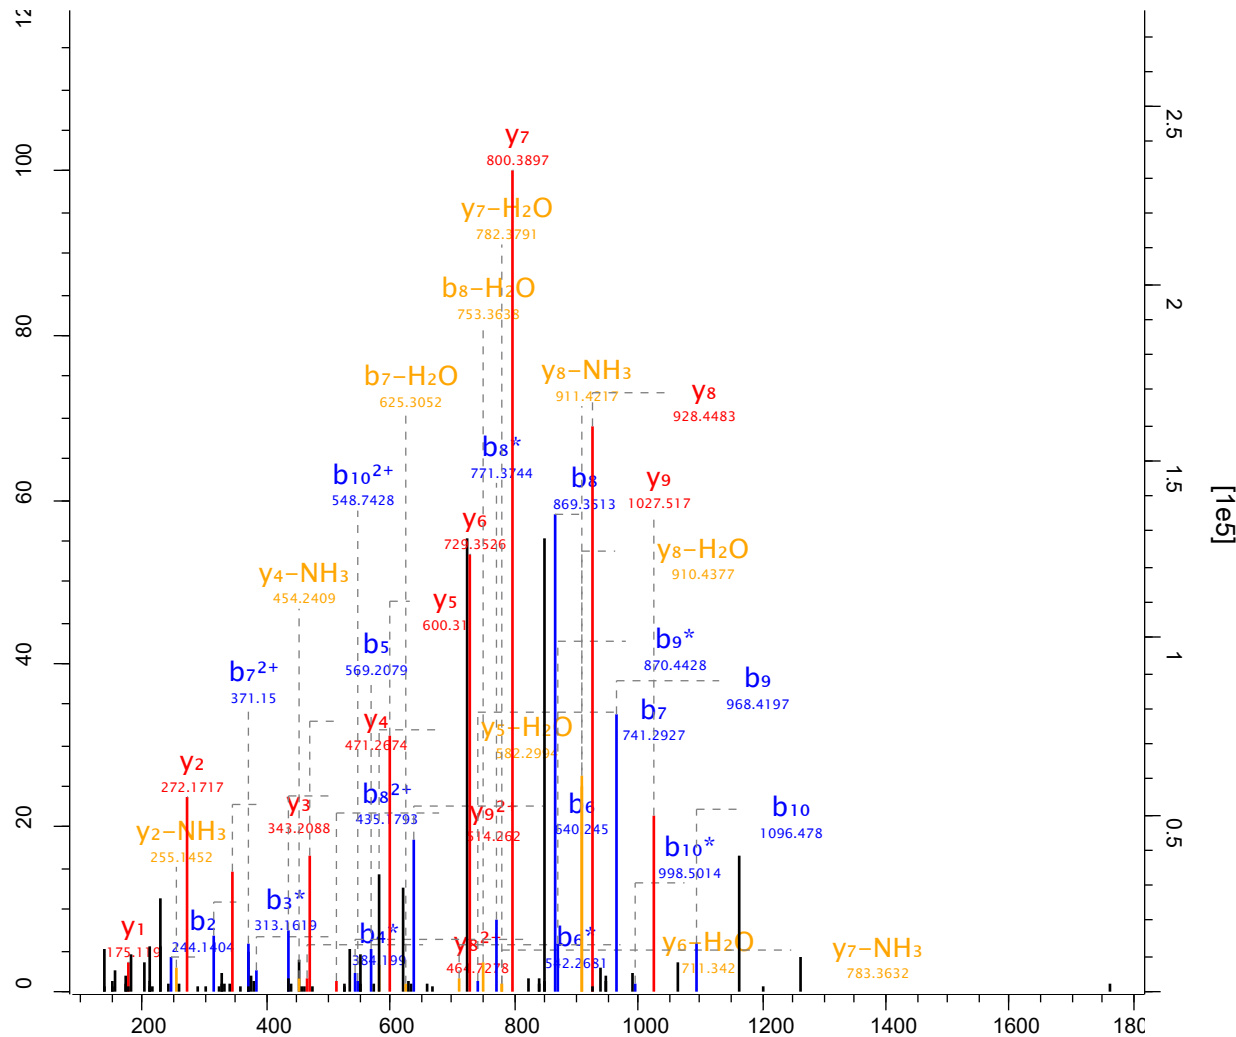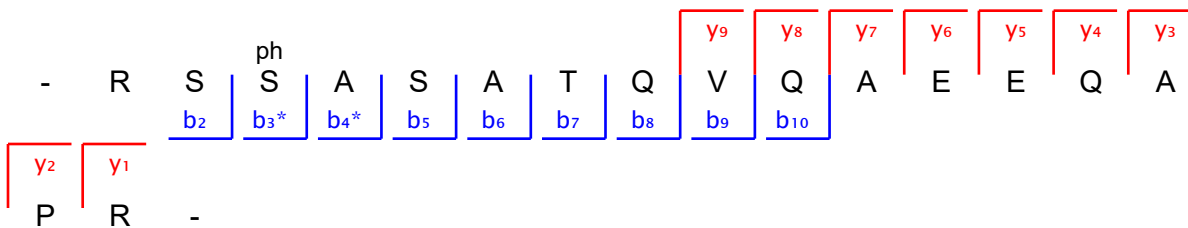

Raw file Scan Method Score m/z  
 sys\_02\_2 6200 FTMS; HCD 115.29 462.73

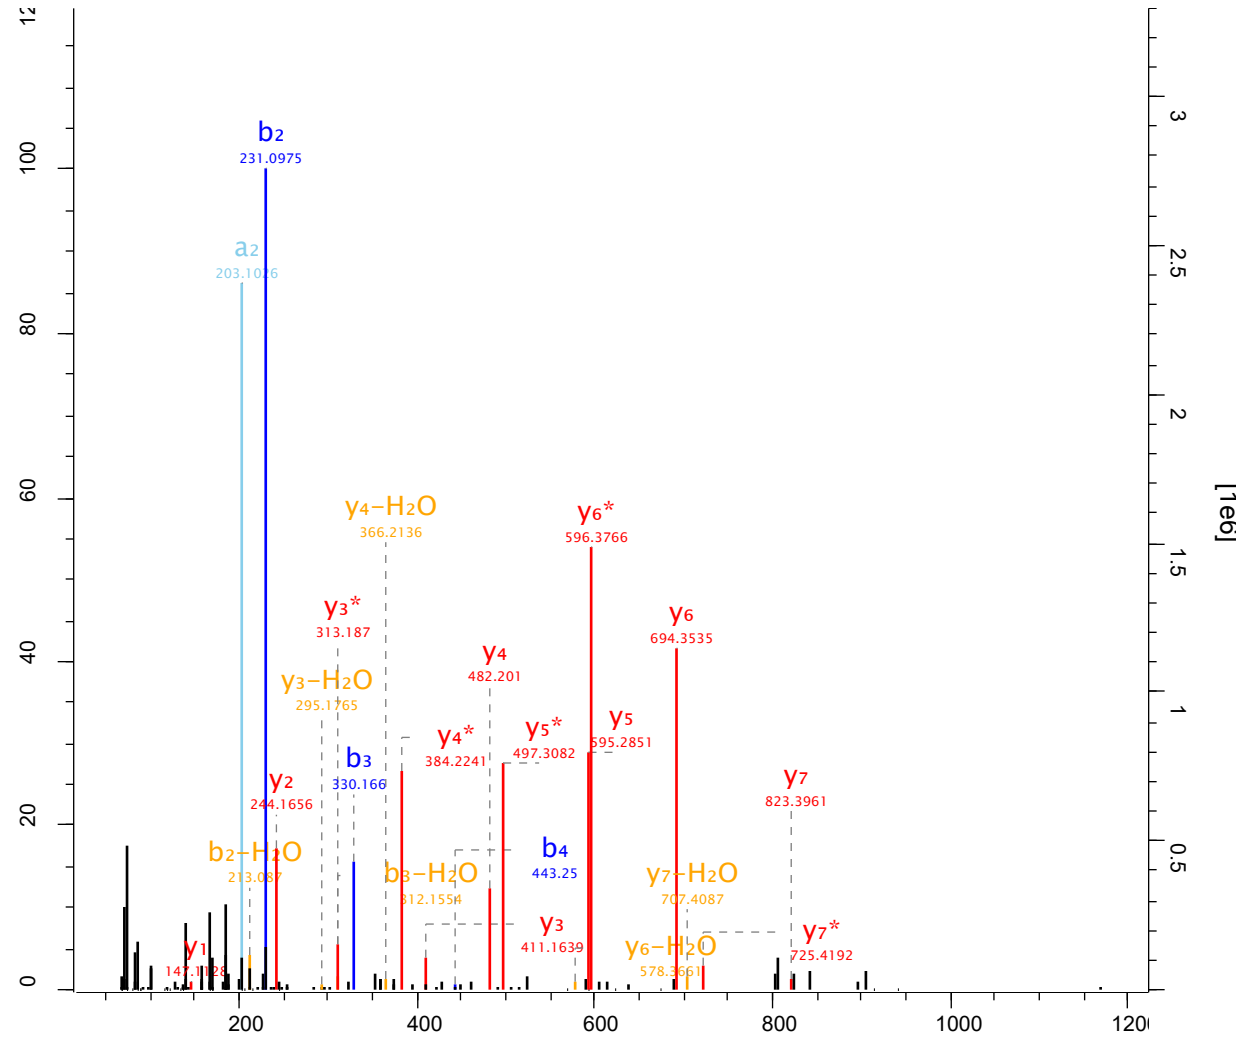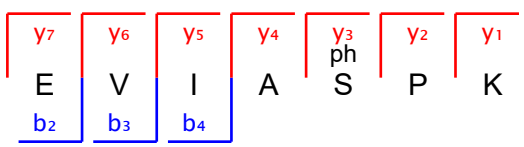

Raw file Scan Method Score m/z  
 sys\_02\_2 6222 FTMS; HCD 132.79 764.82

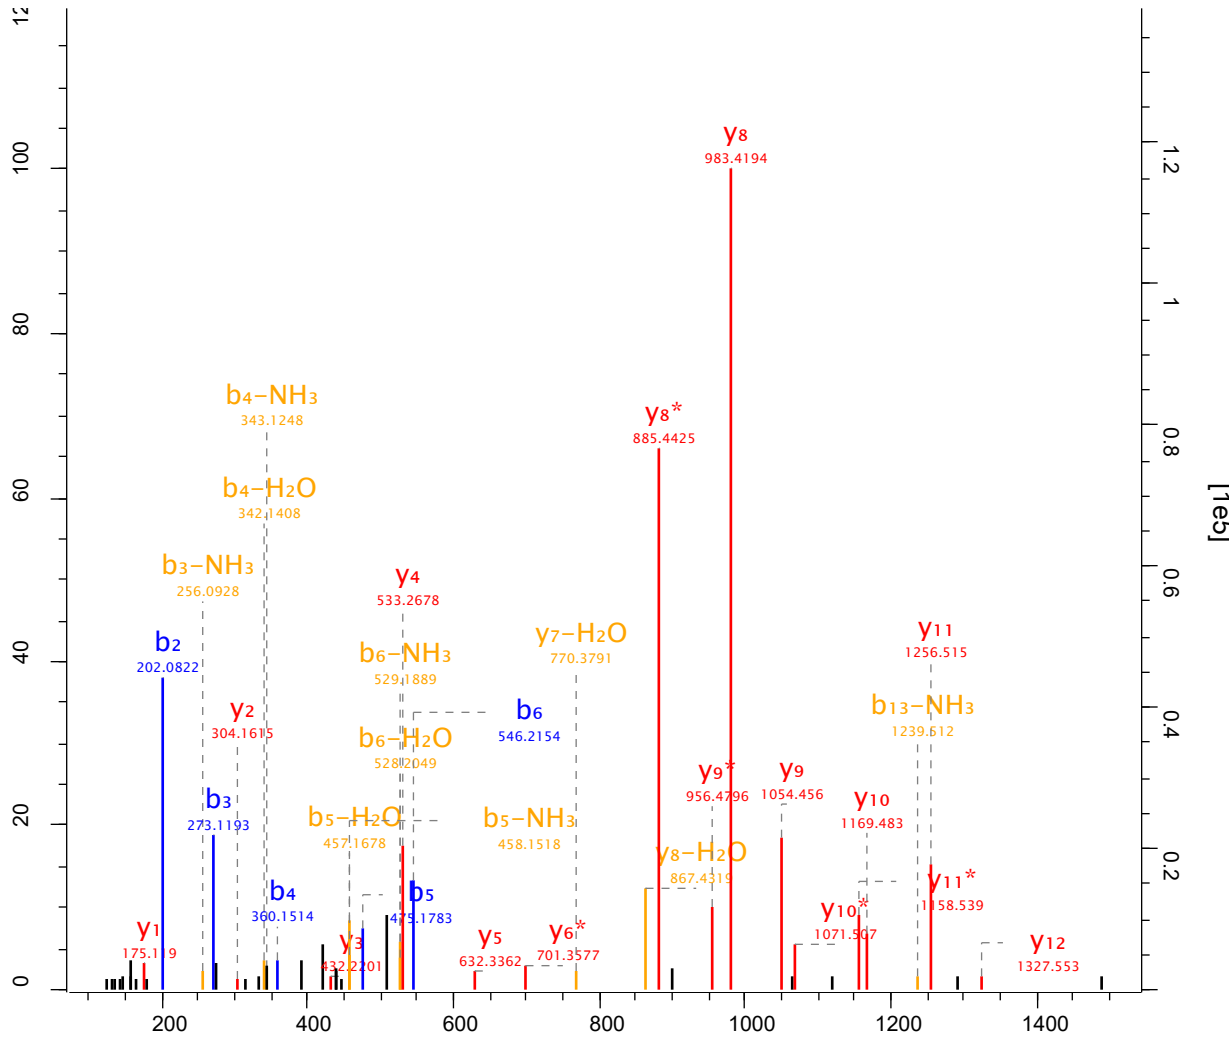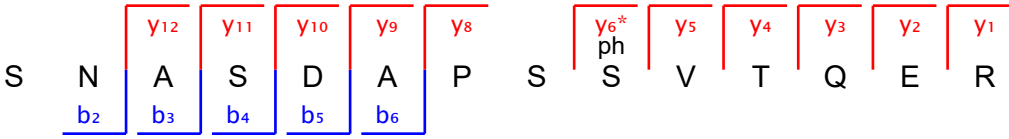

Raw file Scan Method Score m/z  
 sys\_02\_2 6226 FTMS; HCD 107.78 651.95

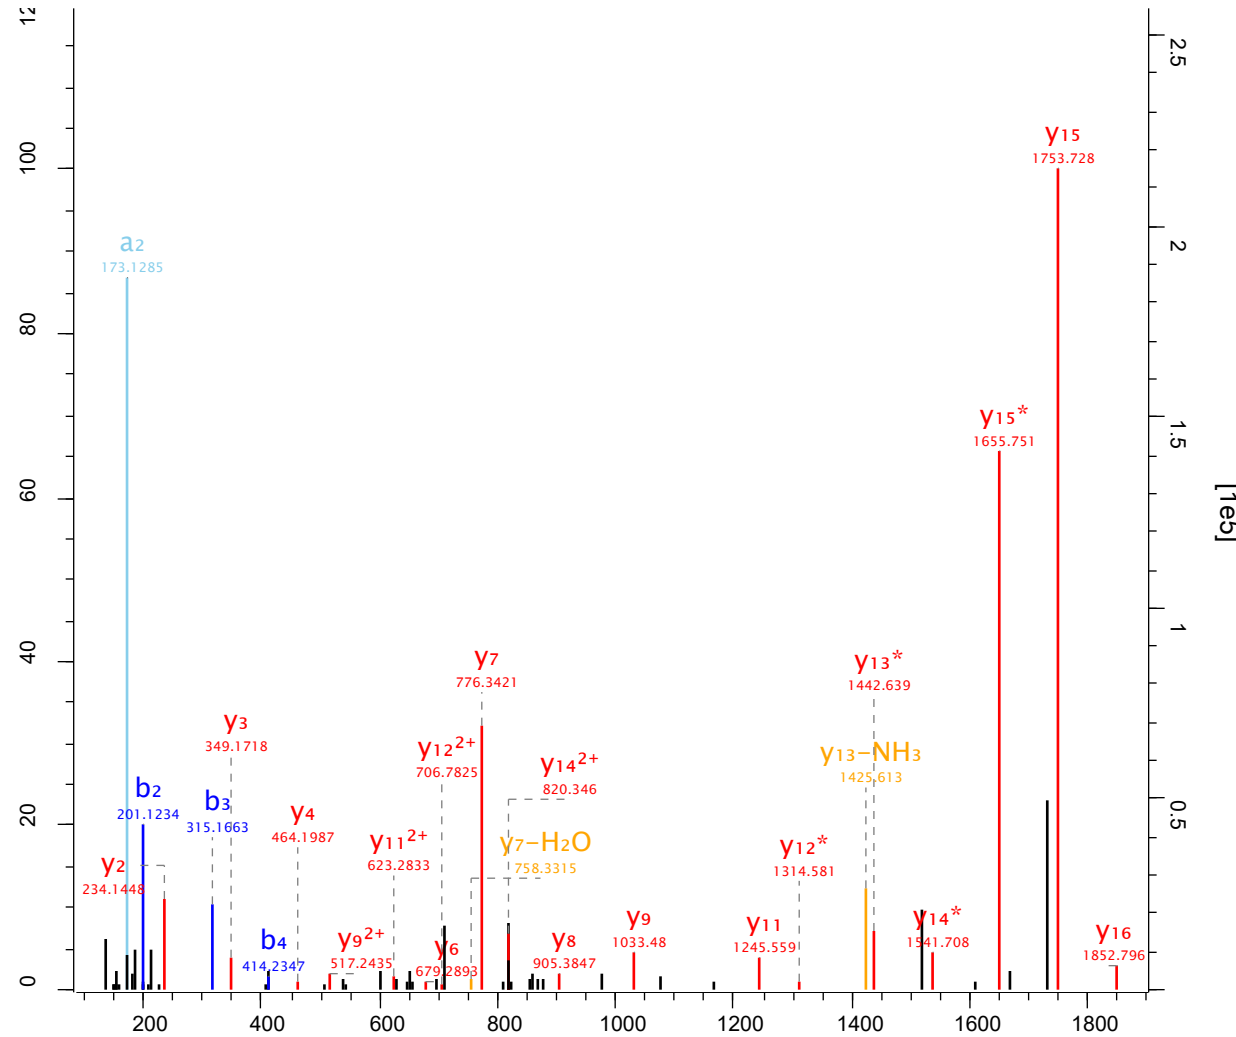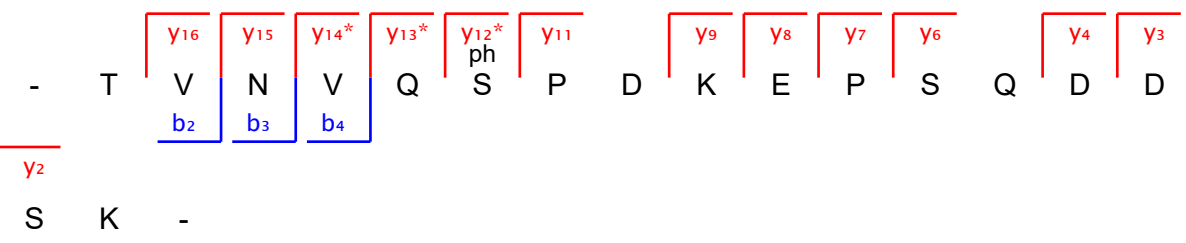

Raw file Scan Method Score m/z  
 sys\_02\_2 6237 FTMS; HCD 90.7 602.77

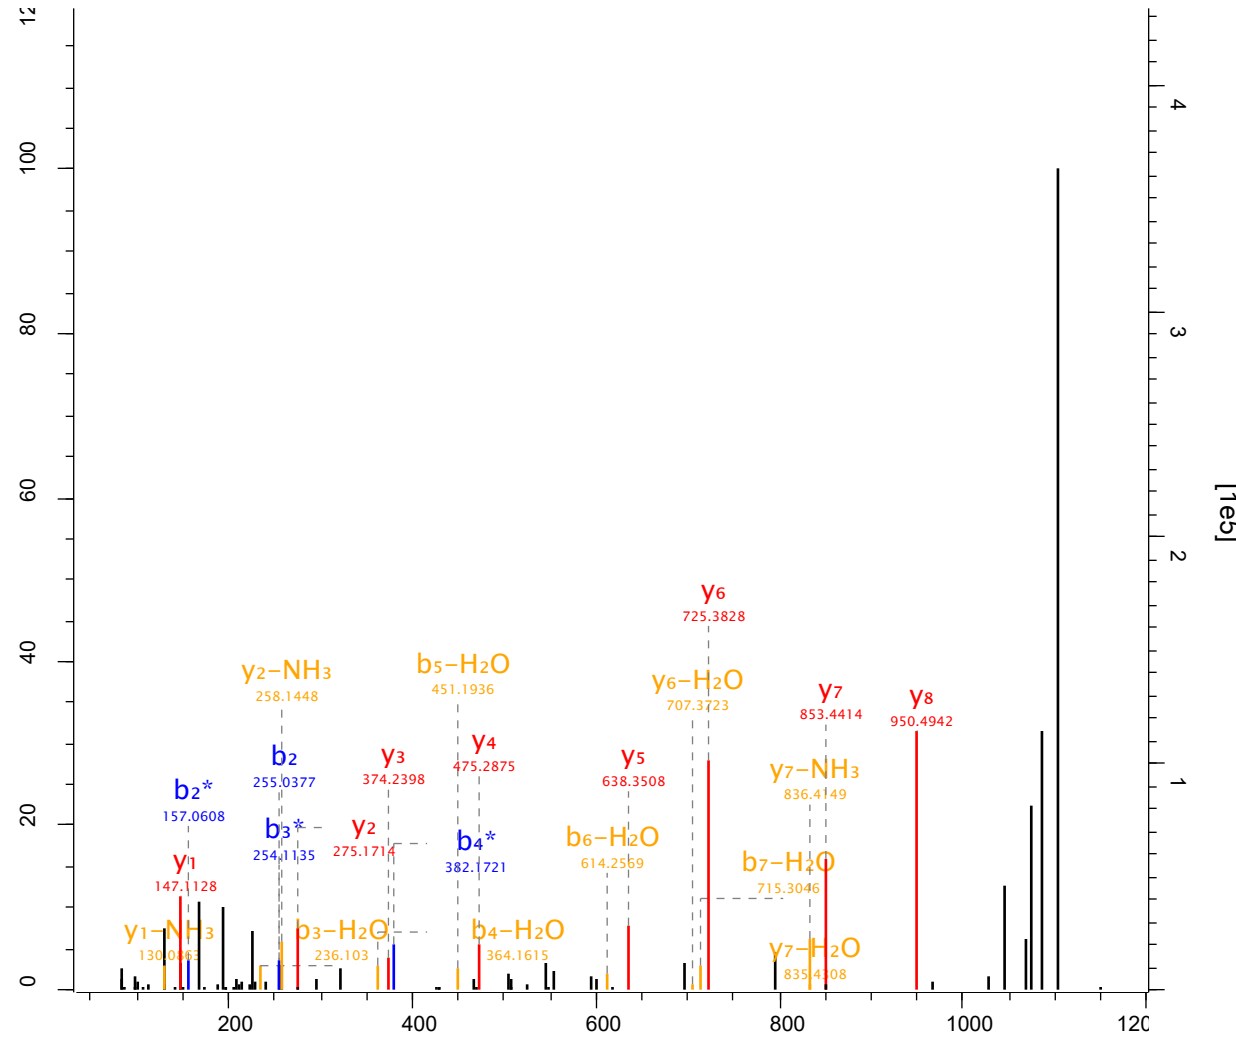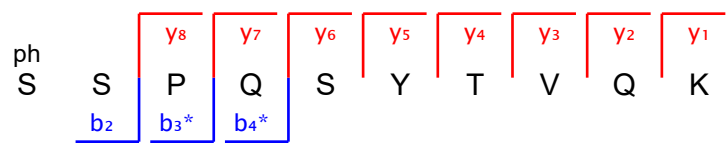



| Raw file | Scan | Method    | Score | m/z    |
|----------|------|-----------|-------|--------|
| sys_02_2 | 6418 | FTMS; HCD | 42.03 | 535.23 |

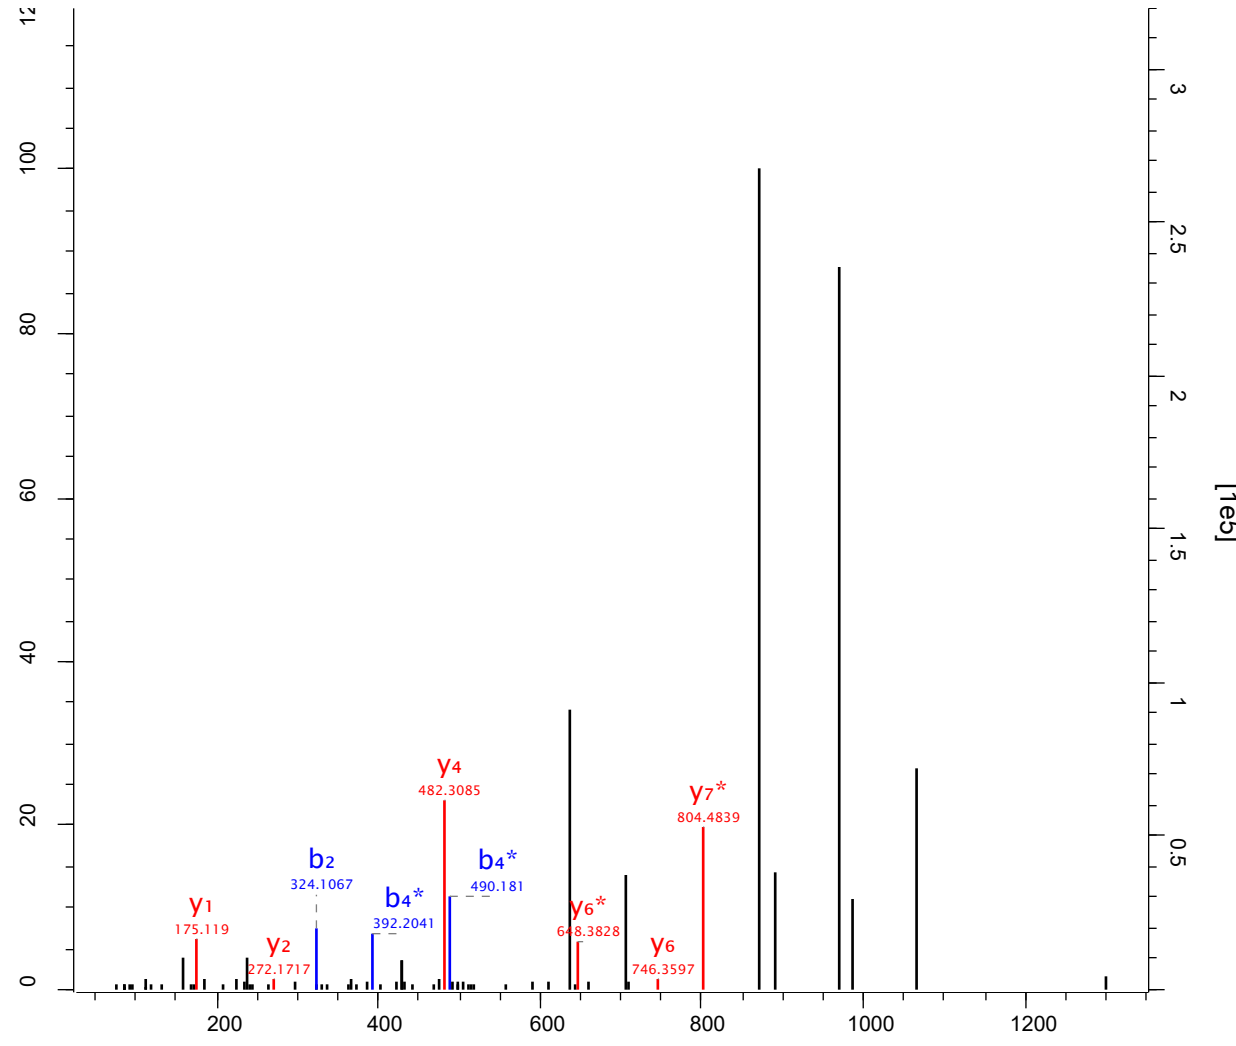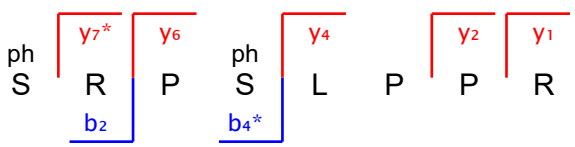

Raw file Scan Method Score m/z  
 sys\_02\_2 6447 FTMS; HCD 78.19 659.77

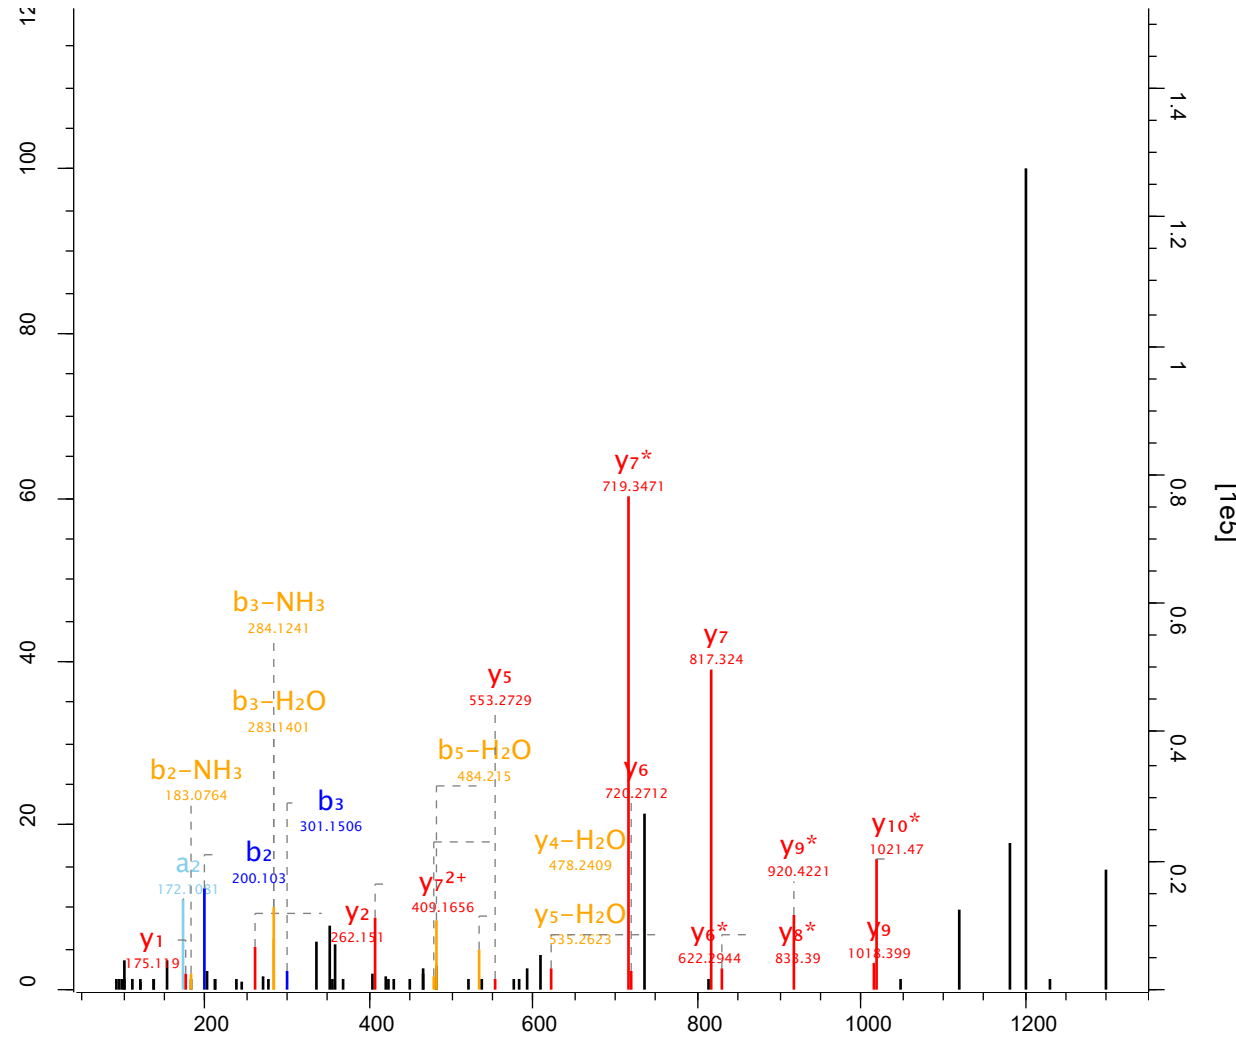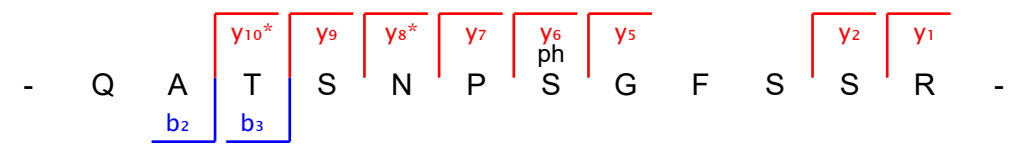

Raw file Scan Method Score m/z  
 sys\_02\_2 6495 FTMS; HCD 98.42 588.26

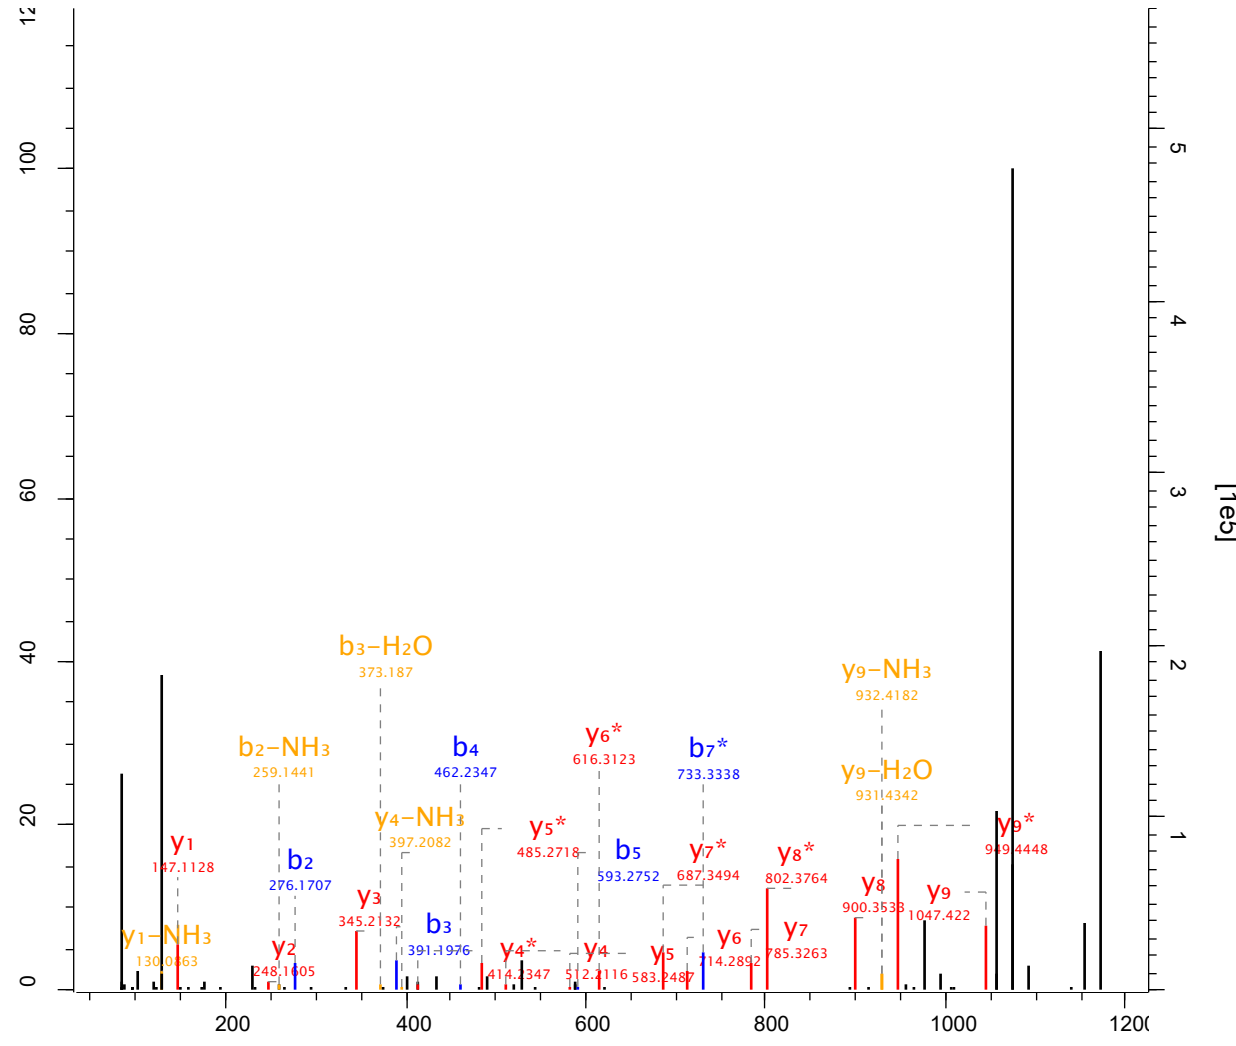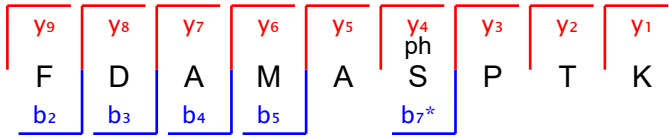

Raw file Scan Method Score m/z  
 sys\_02\_2 6522 FTMS; HCD 62.59 628.29

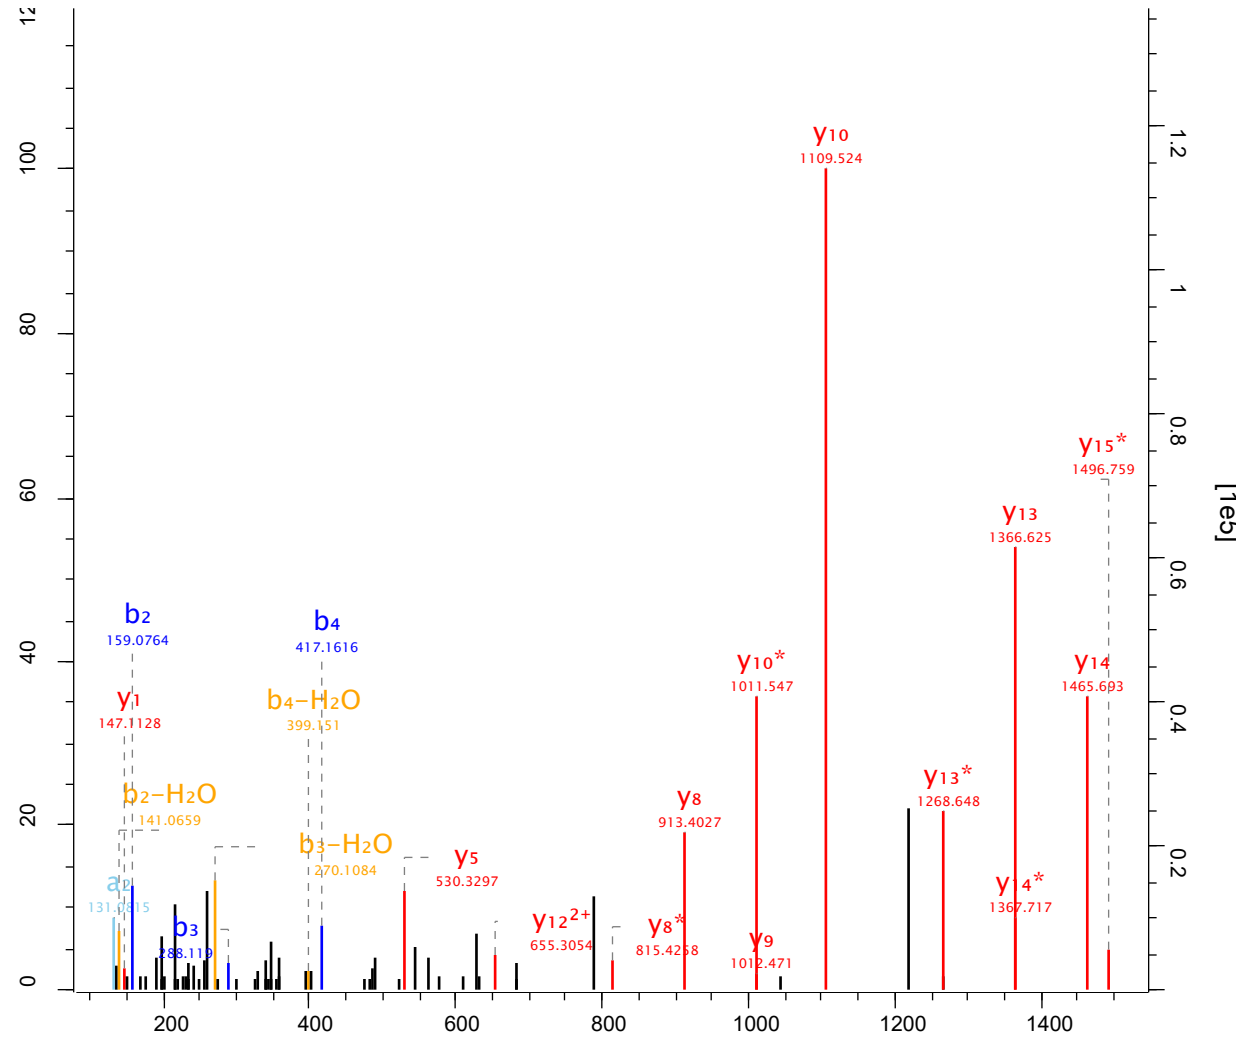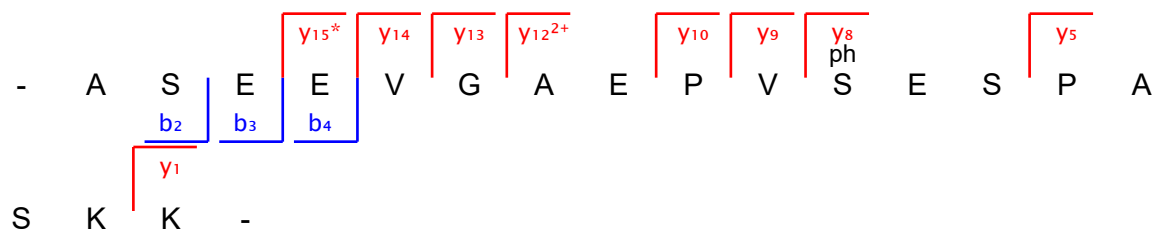

Raw file Scan Method Score m/z  
 sys\_02\_2 6699 FTMS; HCD 102.45 653.95

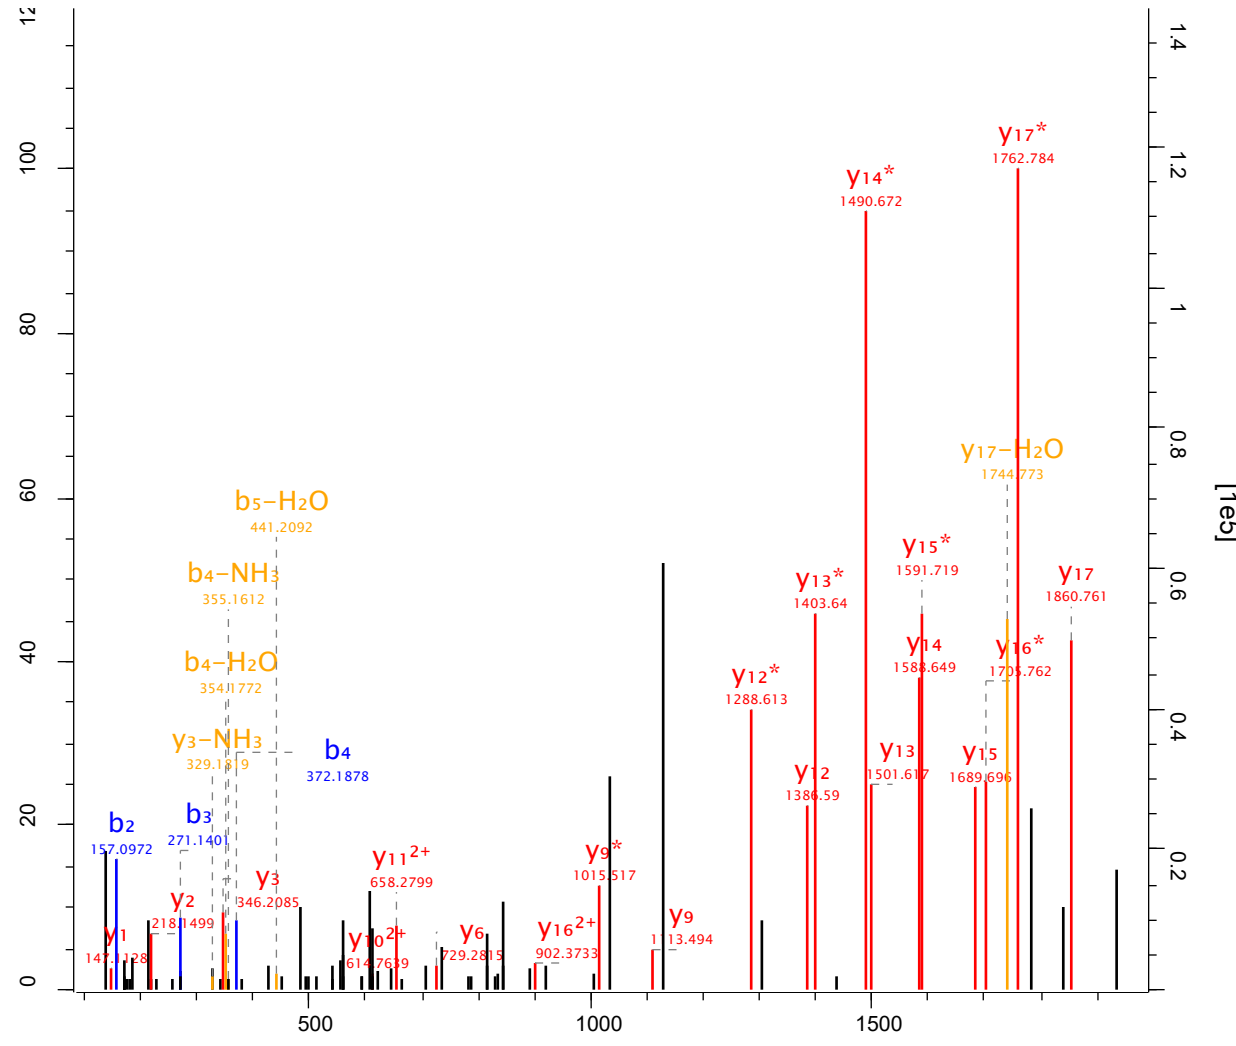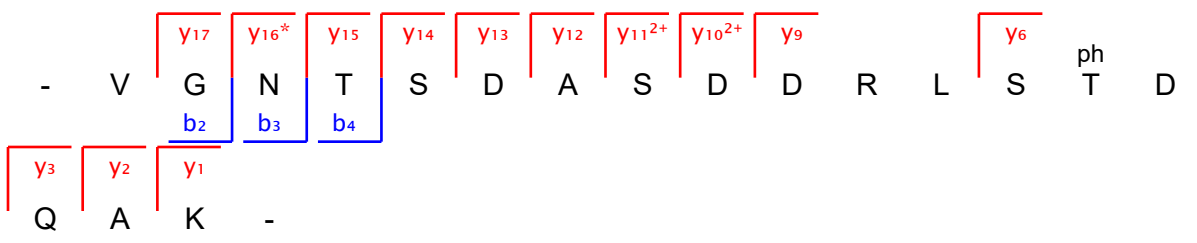

| Raw file | Scan | Method    | Score | m/z    |
|----------|------|-----------|-------|--------|
| sys_02_2 | 6730 | FTMS; HCD | 47.71 | 609.78 |

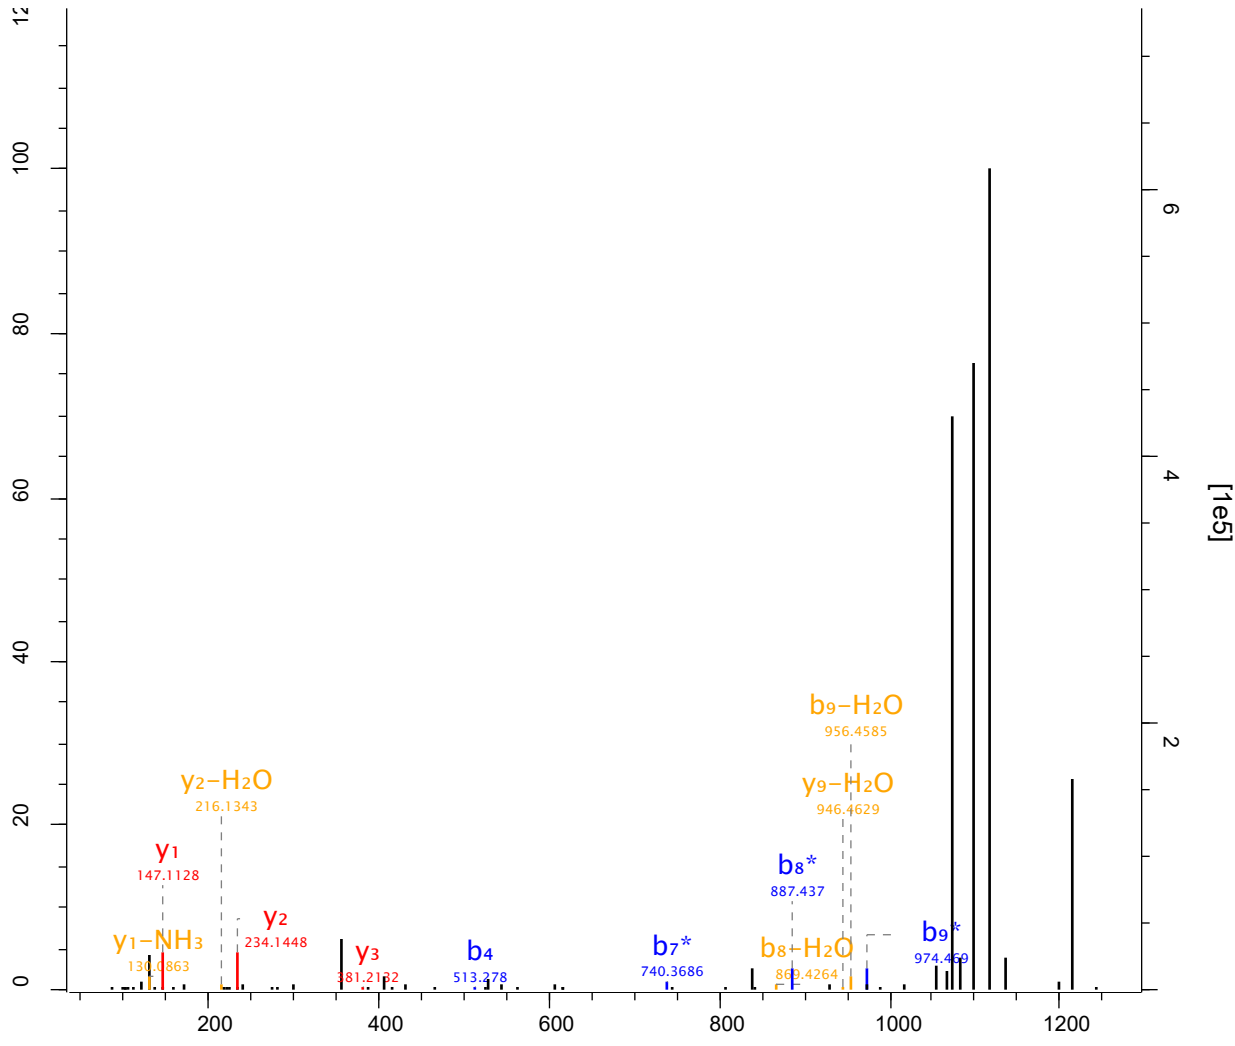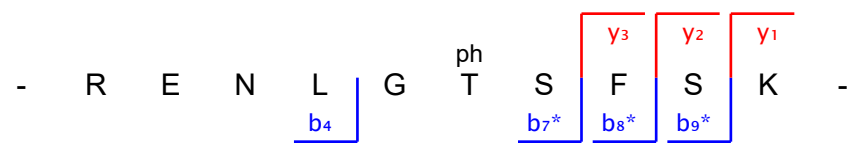

Raw file Scan Method Score m/z  
 sys\_02\_2 6732 FTMS; HCD 130.01 480.71

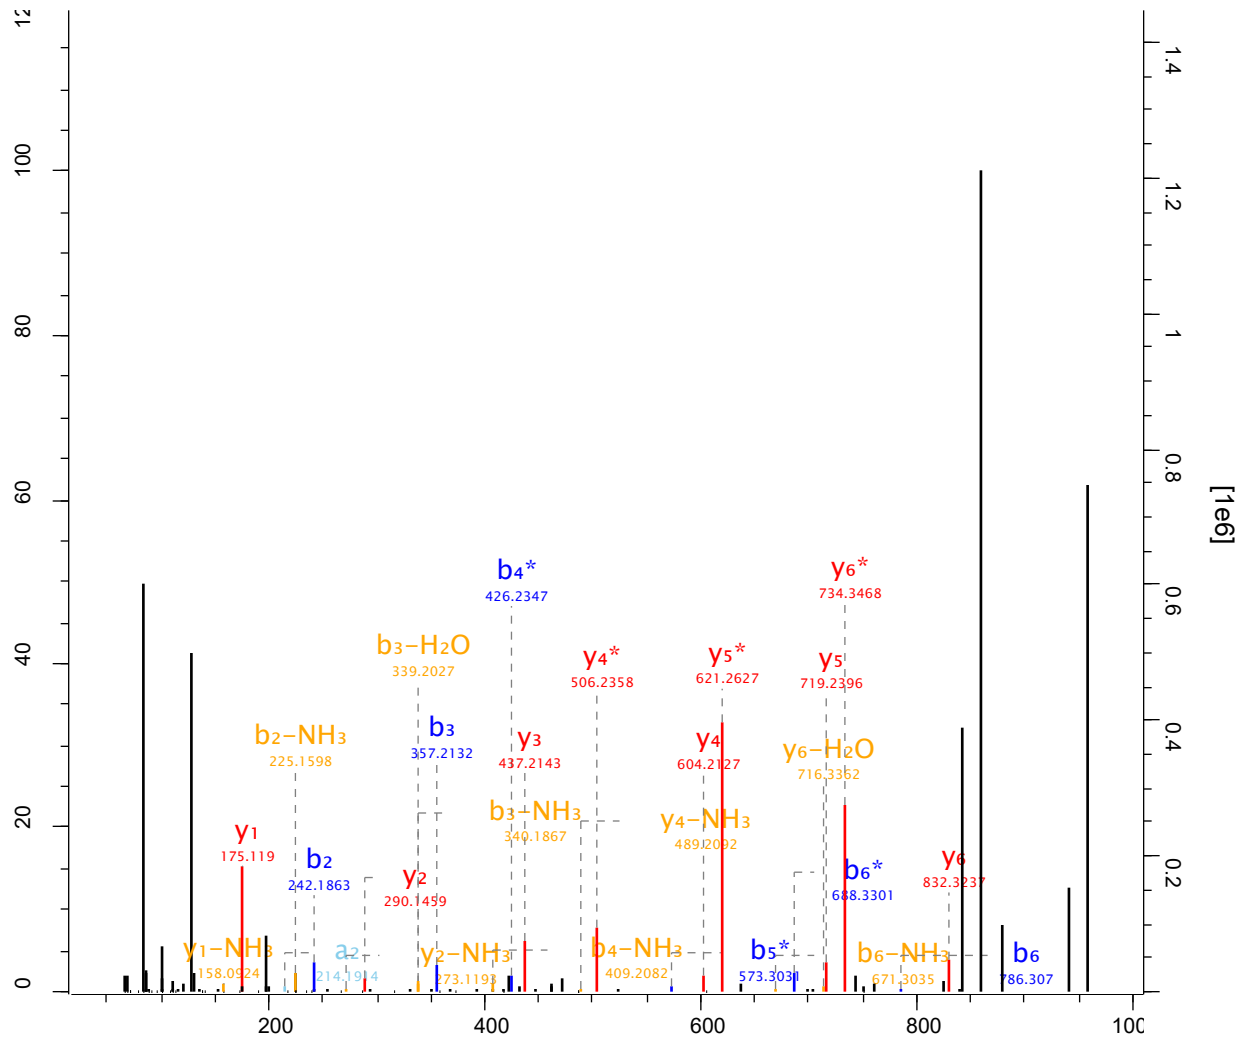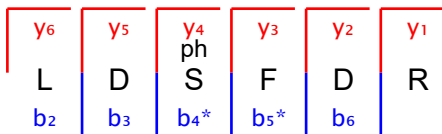

Raw file Scan Method Score m/z  
 sys\_02\_2 6867 FTMS; HCD 107.06 559.74

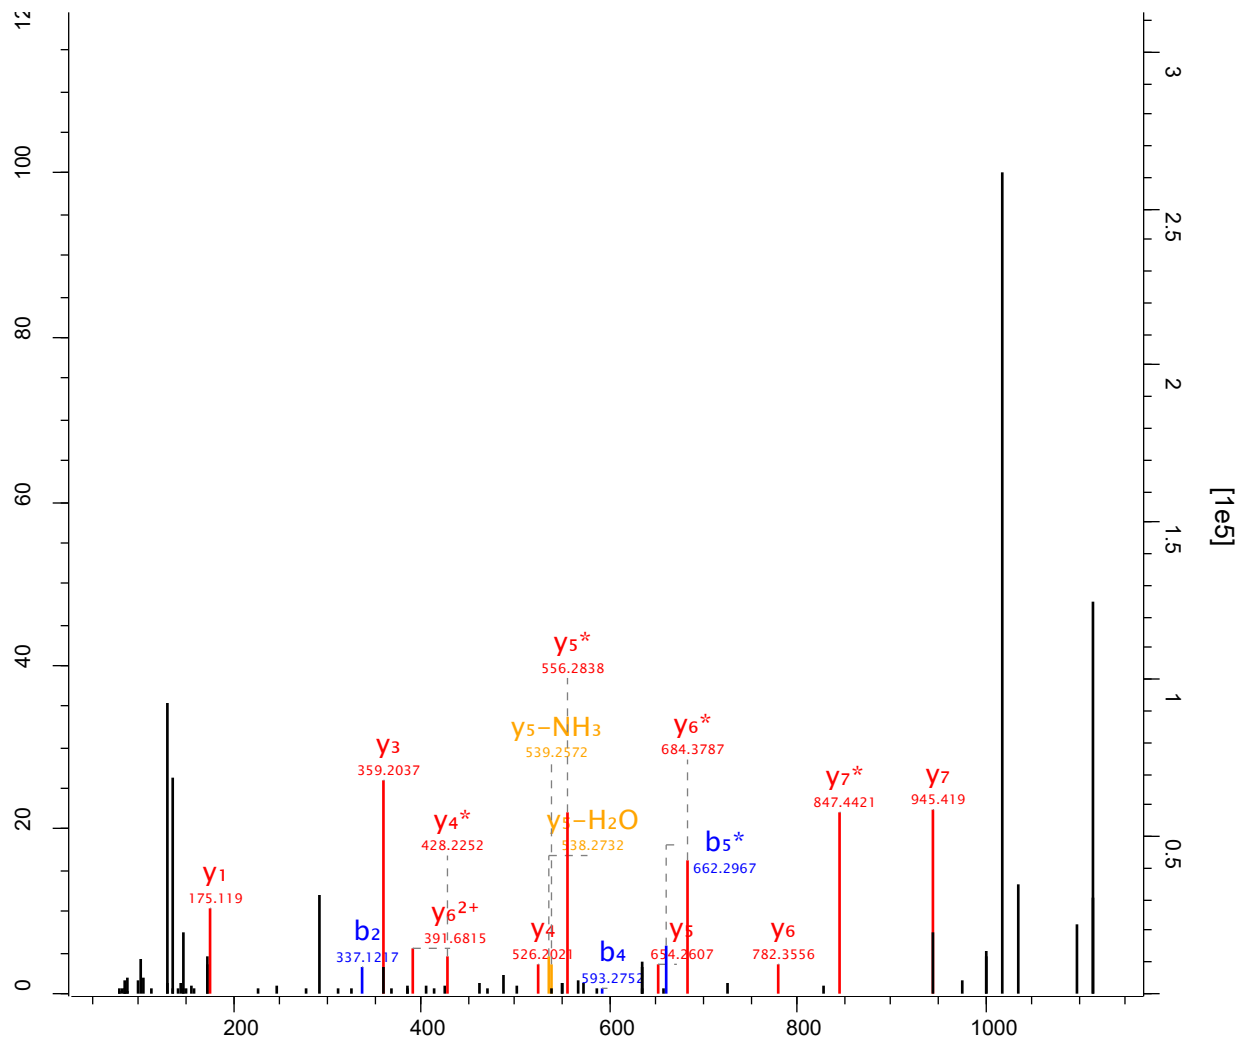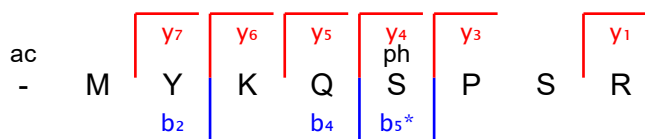



Raw file Scan Method Score m/z  
 sys\_02\_2 7057 FTMS; HCD 45 529.22

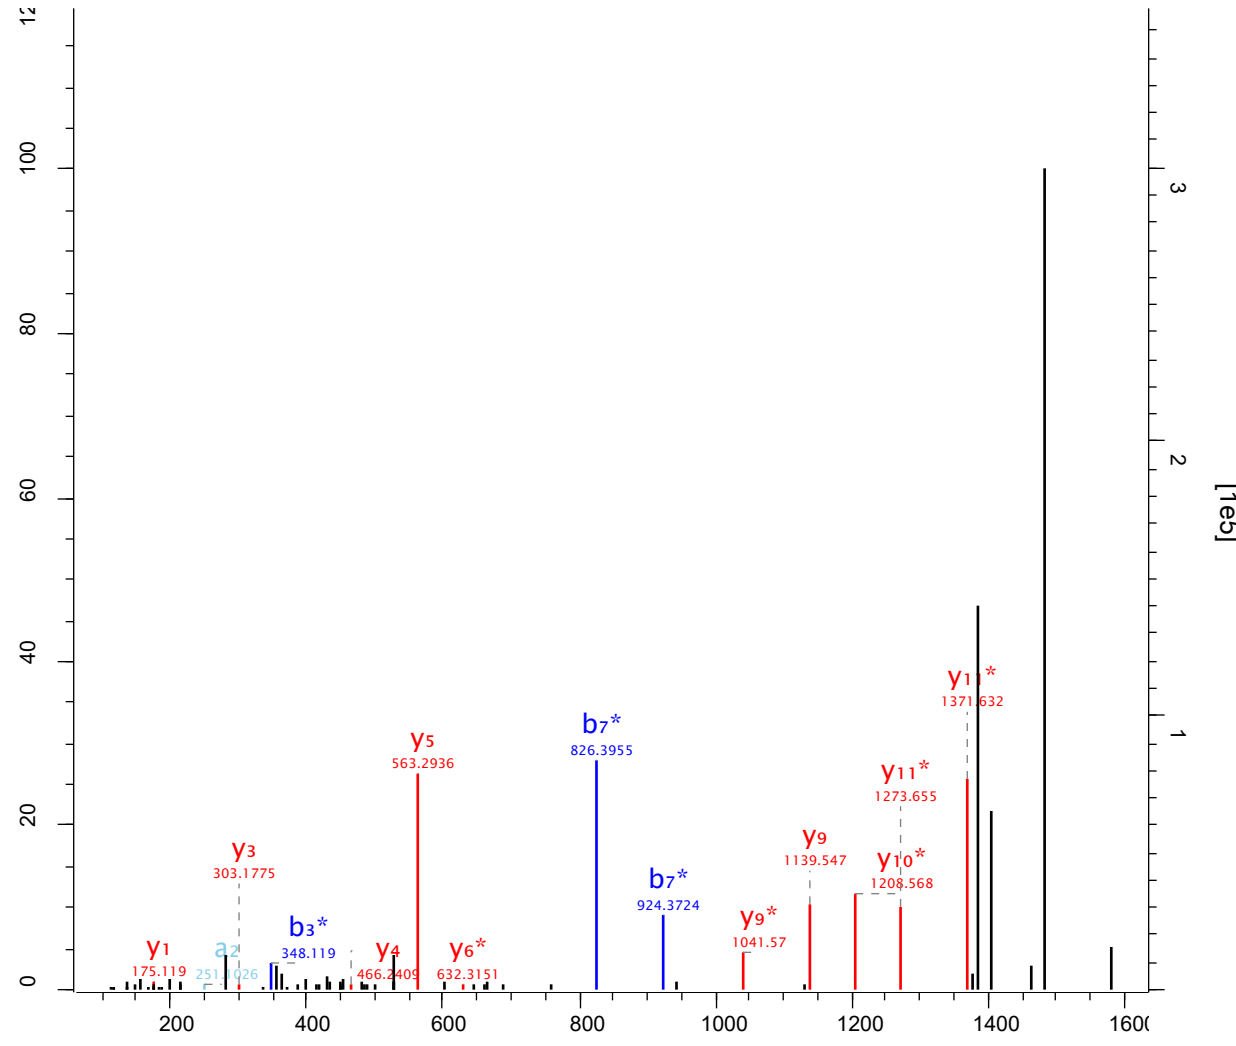

- D Y S P R R S P Y A G R -  
 (Labels above: y11\*, y10\*, y9, y6\*, y5, y4, y3, y1)  
 (Labels below: a2, b3\*, b7\*)

Raw file Scan Method Score m/z  
 sys\_02\_2 7075 FTMS; HCD 89.47 724.29

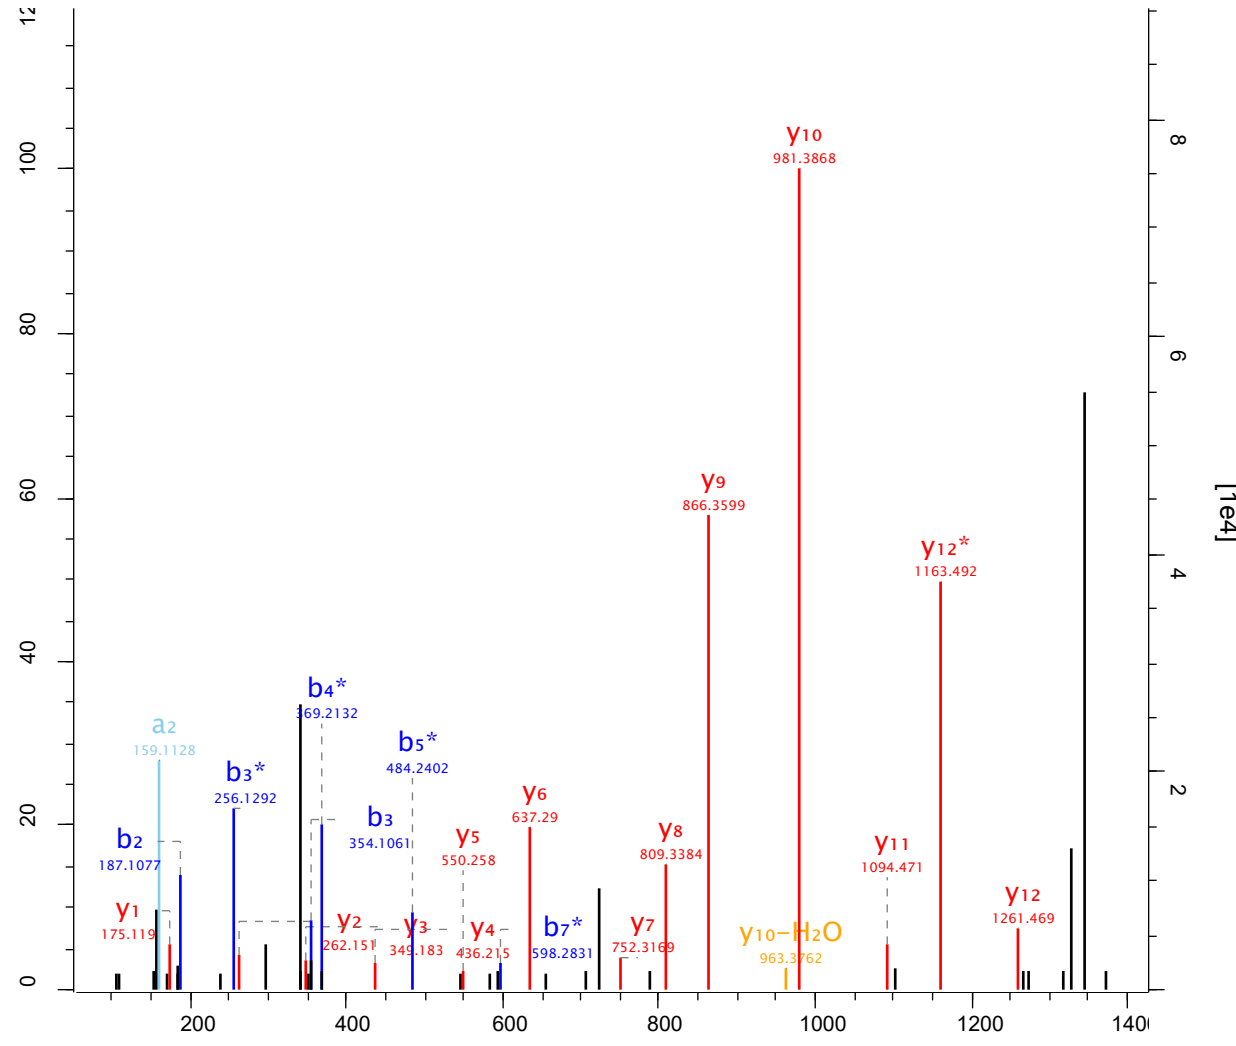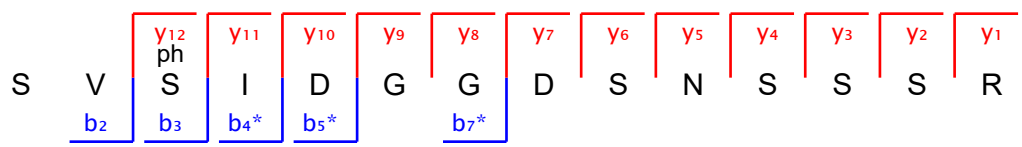

Raw file Scan Method Score m/z  
 sys\_02\_2 7097 FTMS; HCD 67.65 639.93

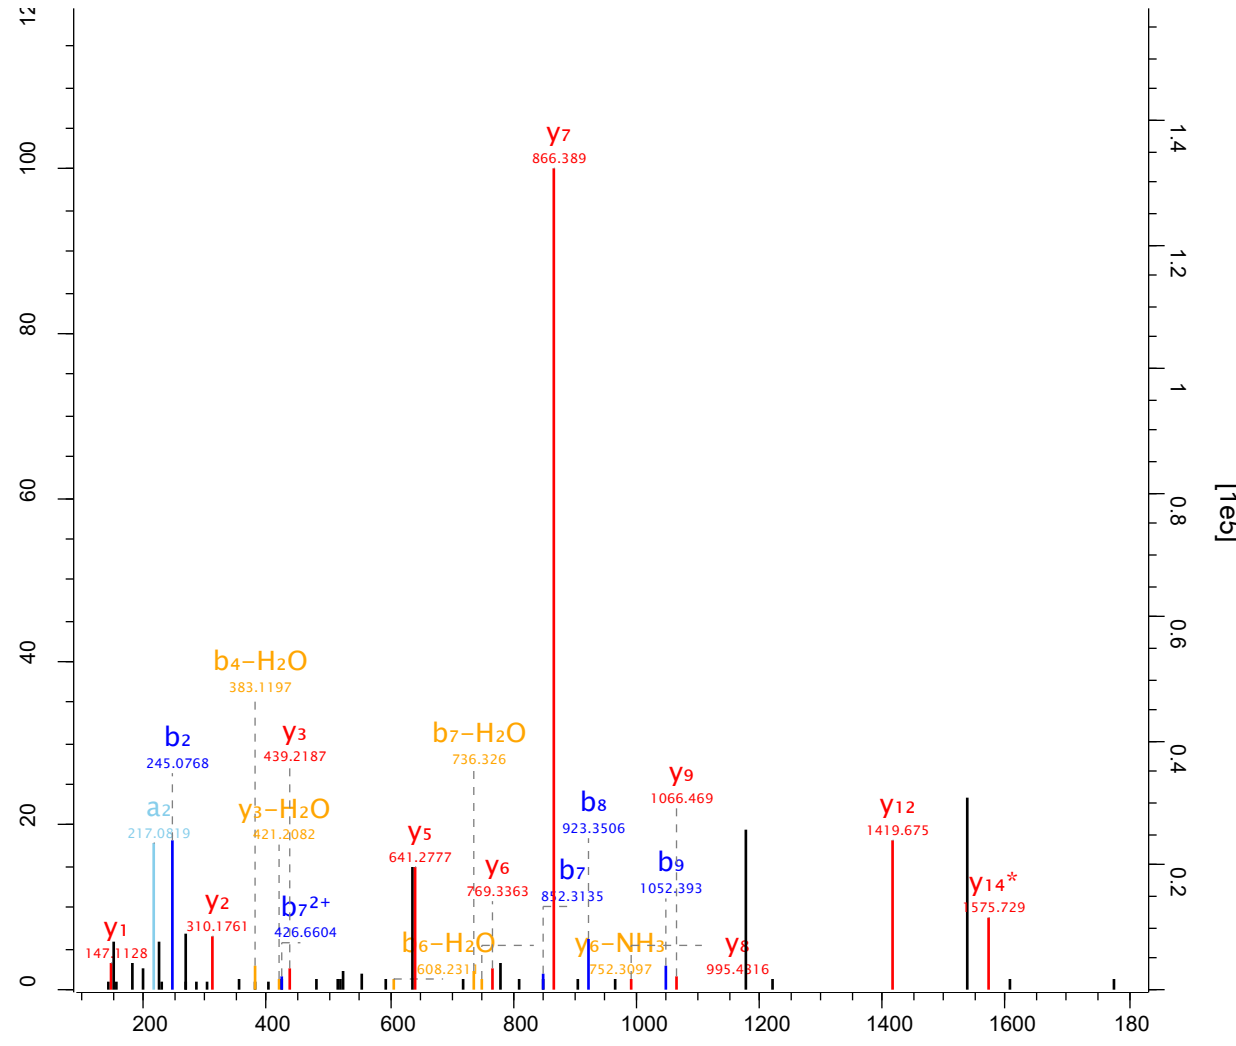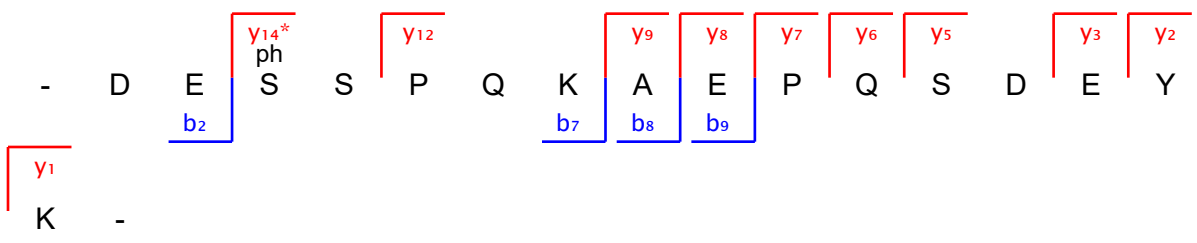

Raw file Scan Method Score m/z  
 sys\_02\_2 7148 FTMS; HCD 106.23 580.9

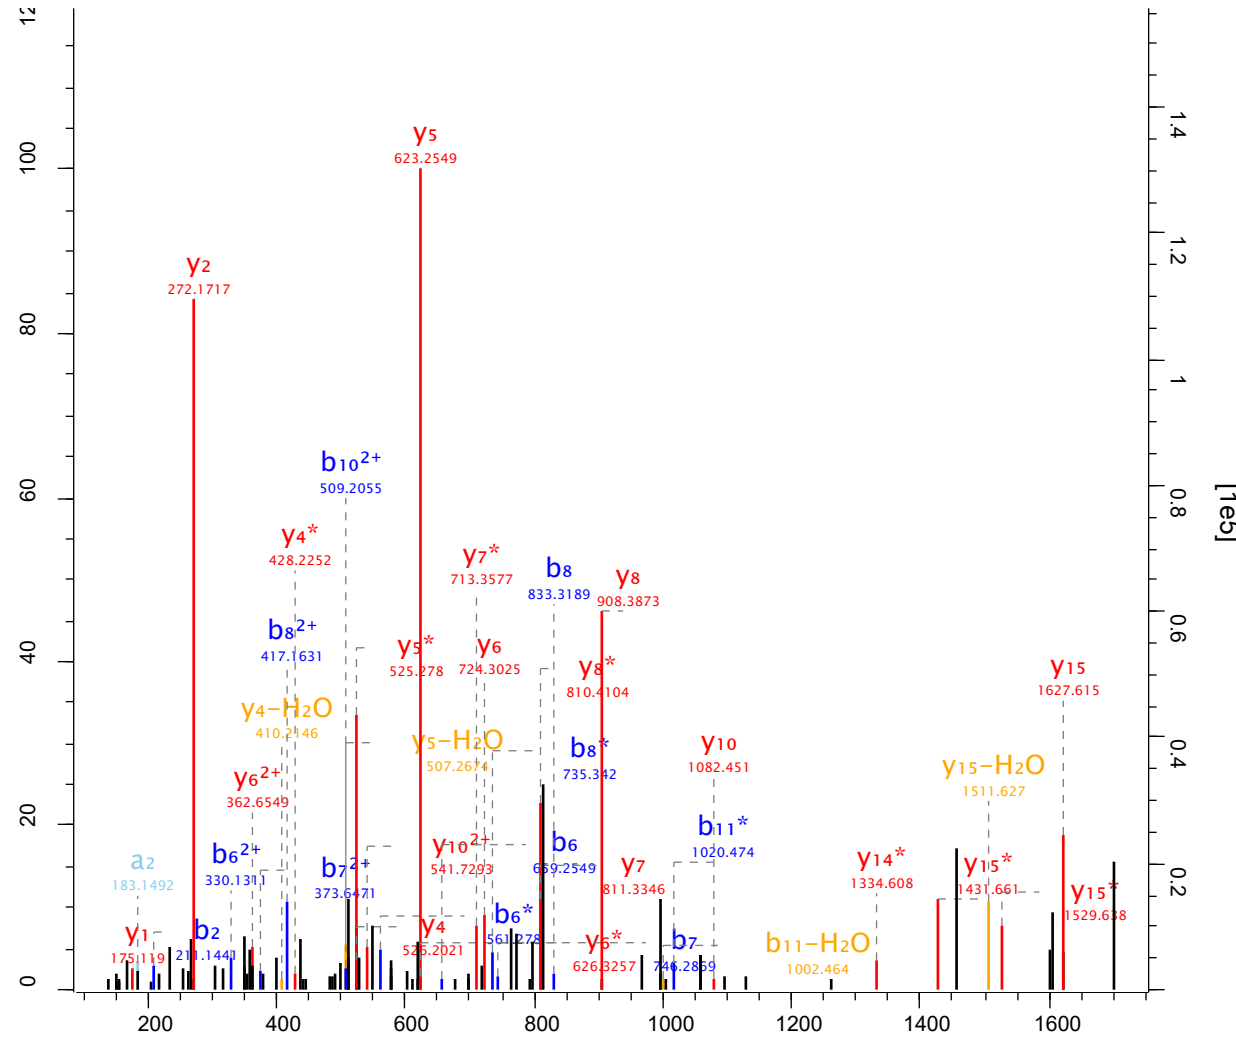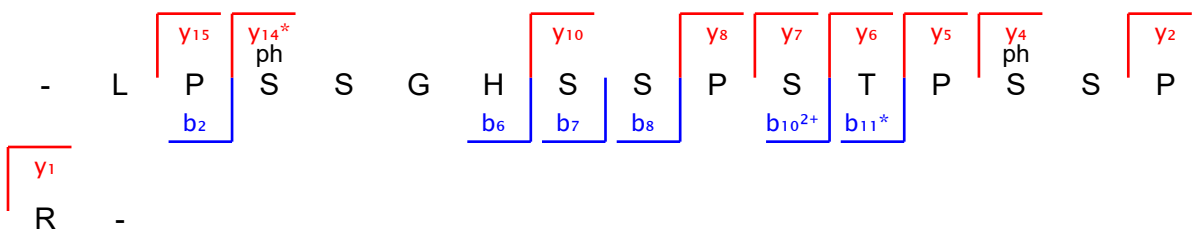

Raw file Scan Method Score m/z  
 sys\_02\_2 7166 FTMS; HCD 255.93 827.86

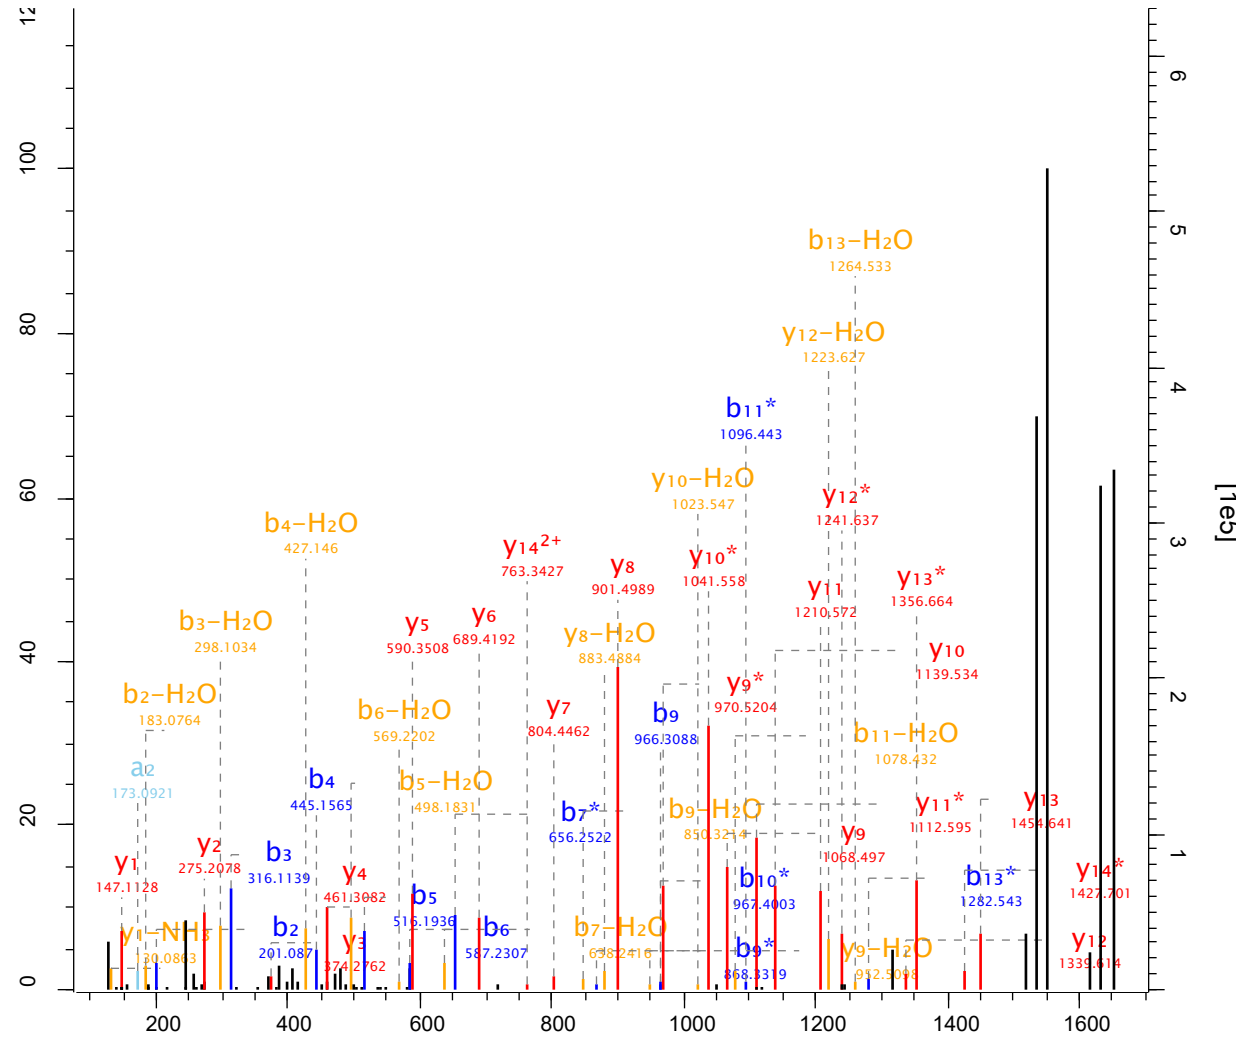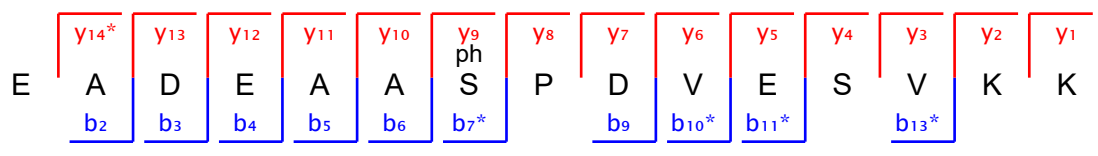

| Raw file | Scan | Method    | Score | m/z    |
|----------|------|-----------|-------|--------|
| sys_02_2 | 7182 | FTMS; HCD | 82.63 | 616.62 |

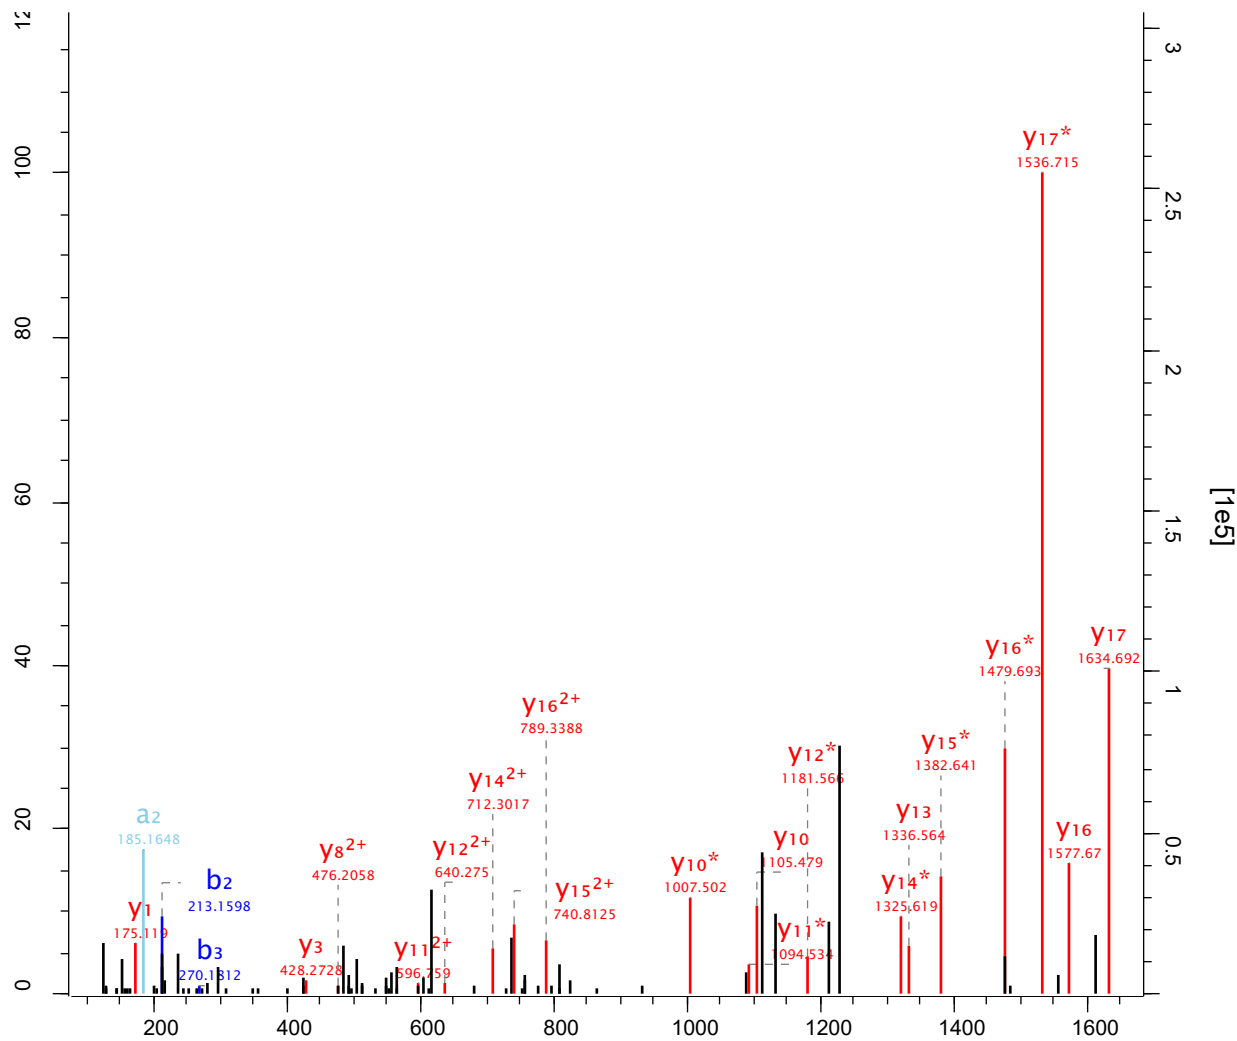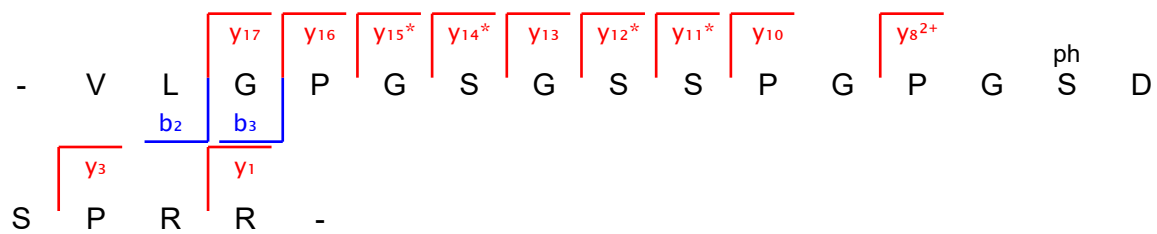

Raw file Scan Method Score m/z  
 sys\_02\_2 7313 FTMS; HCD 50.46 429.85

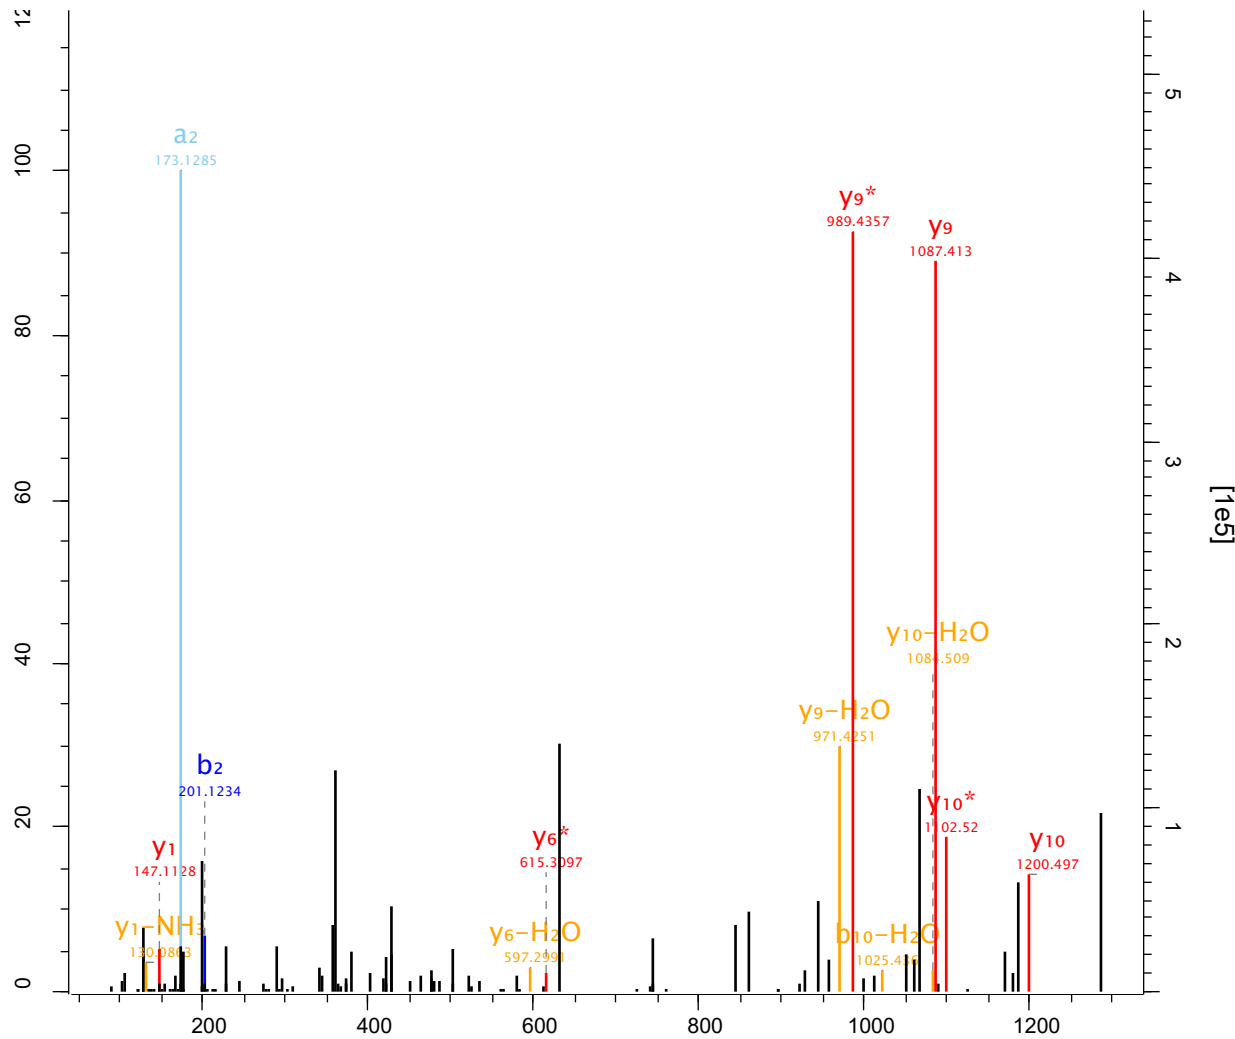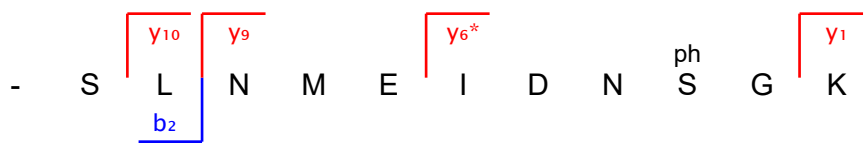

Raw file Scan Method Score m/z  
 sys\_02\_2 7392 FTMS; HCD 182.86 565.27

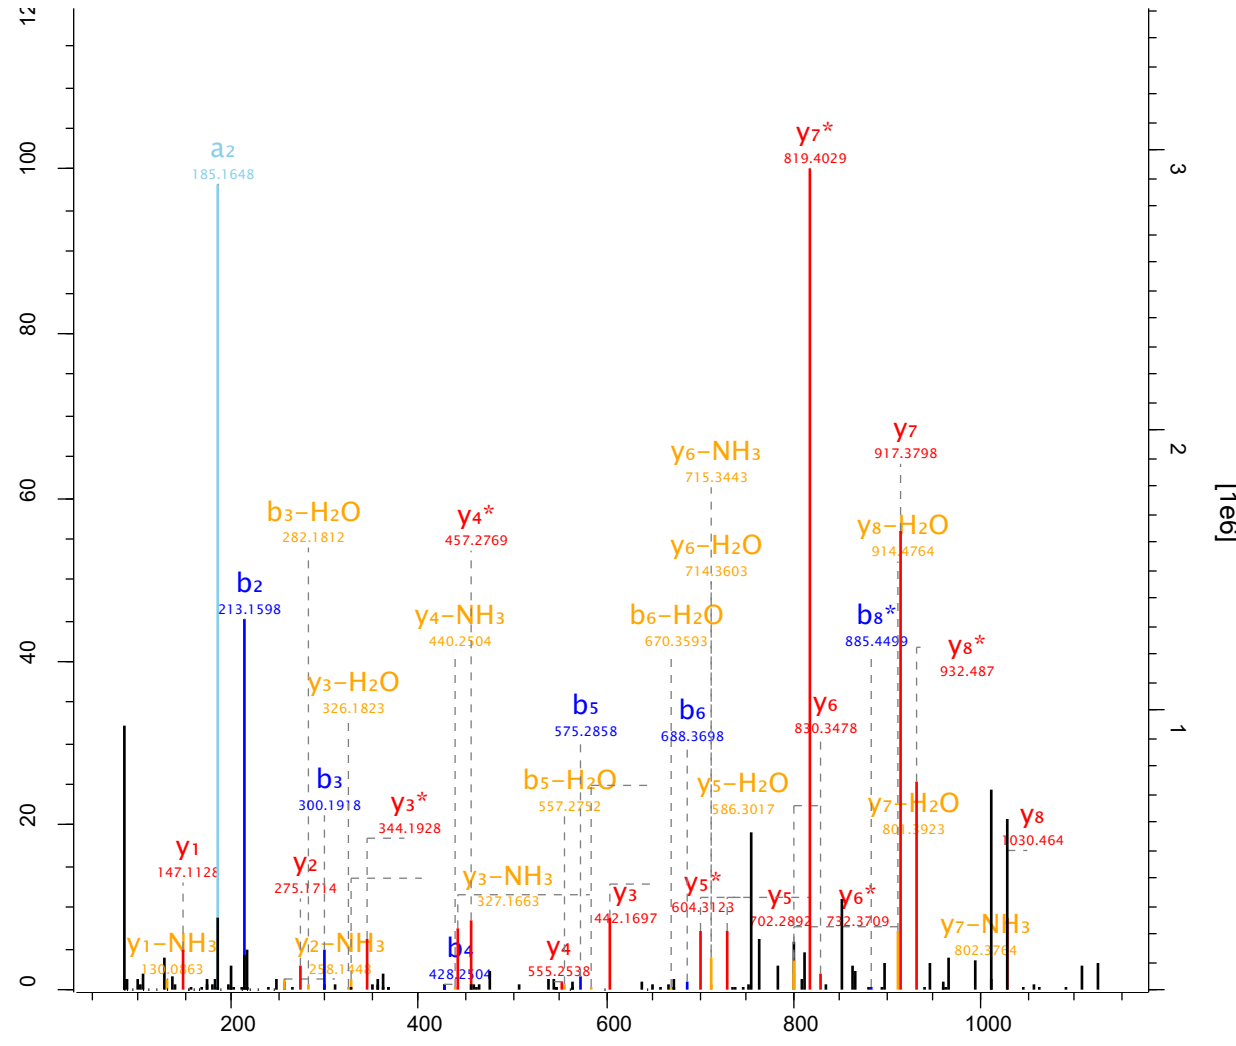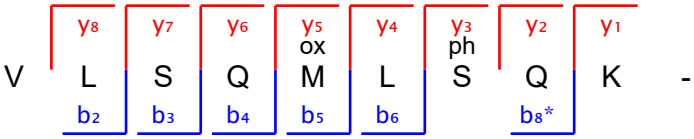



Raw file Scan Method Score m/z  
 sys\_02\_2 7461 FTMS; HCD 189.51 572.76

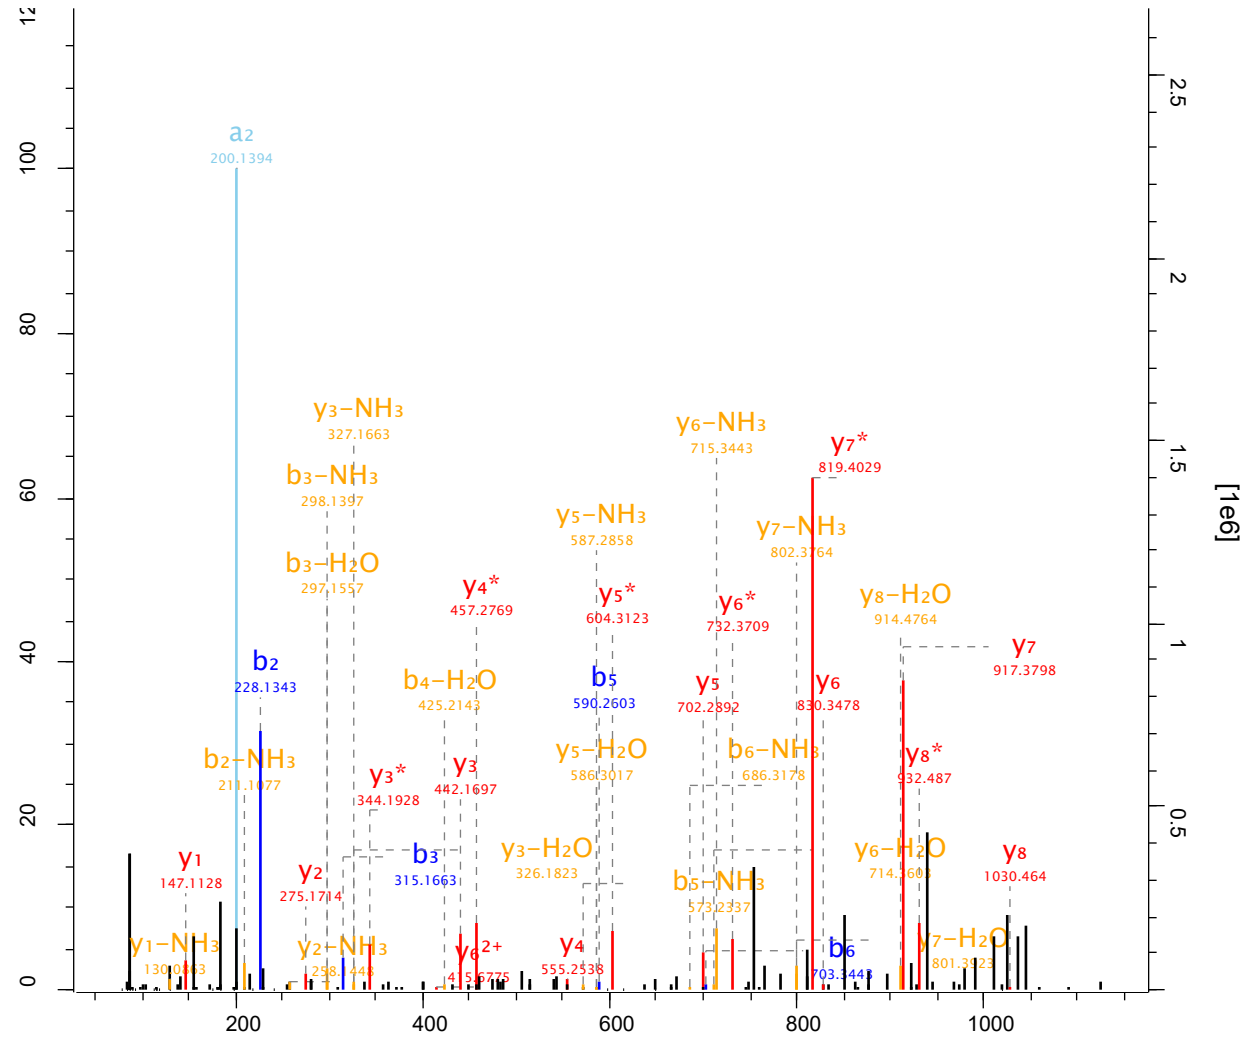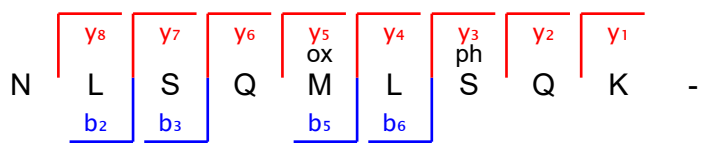

Raw file Scan Method Score m/z  
 sys\_02\_2 7470 FTMS; HCD 83.54 768.79

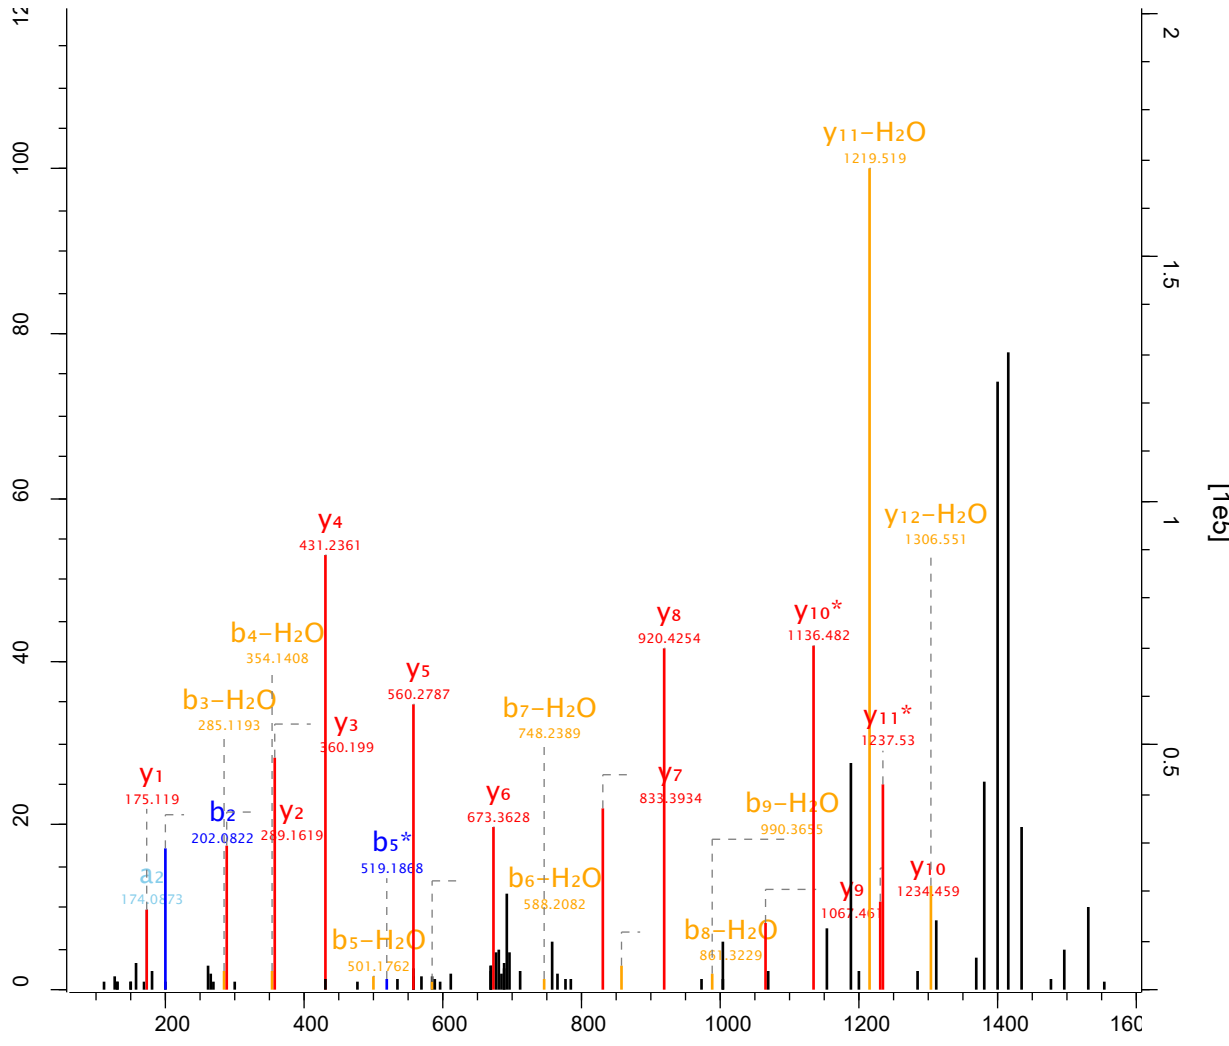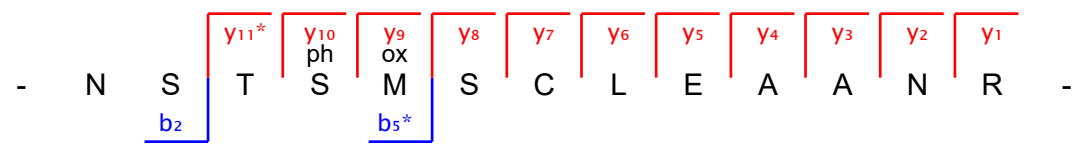

Raw file Scan Method Score m/z  
 sys\_02\_2 7514 FTMS; HCD 195.86 776.85

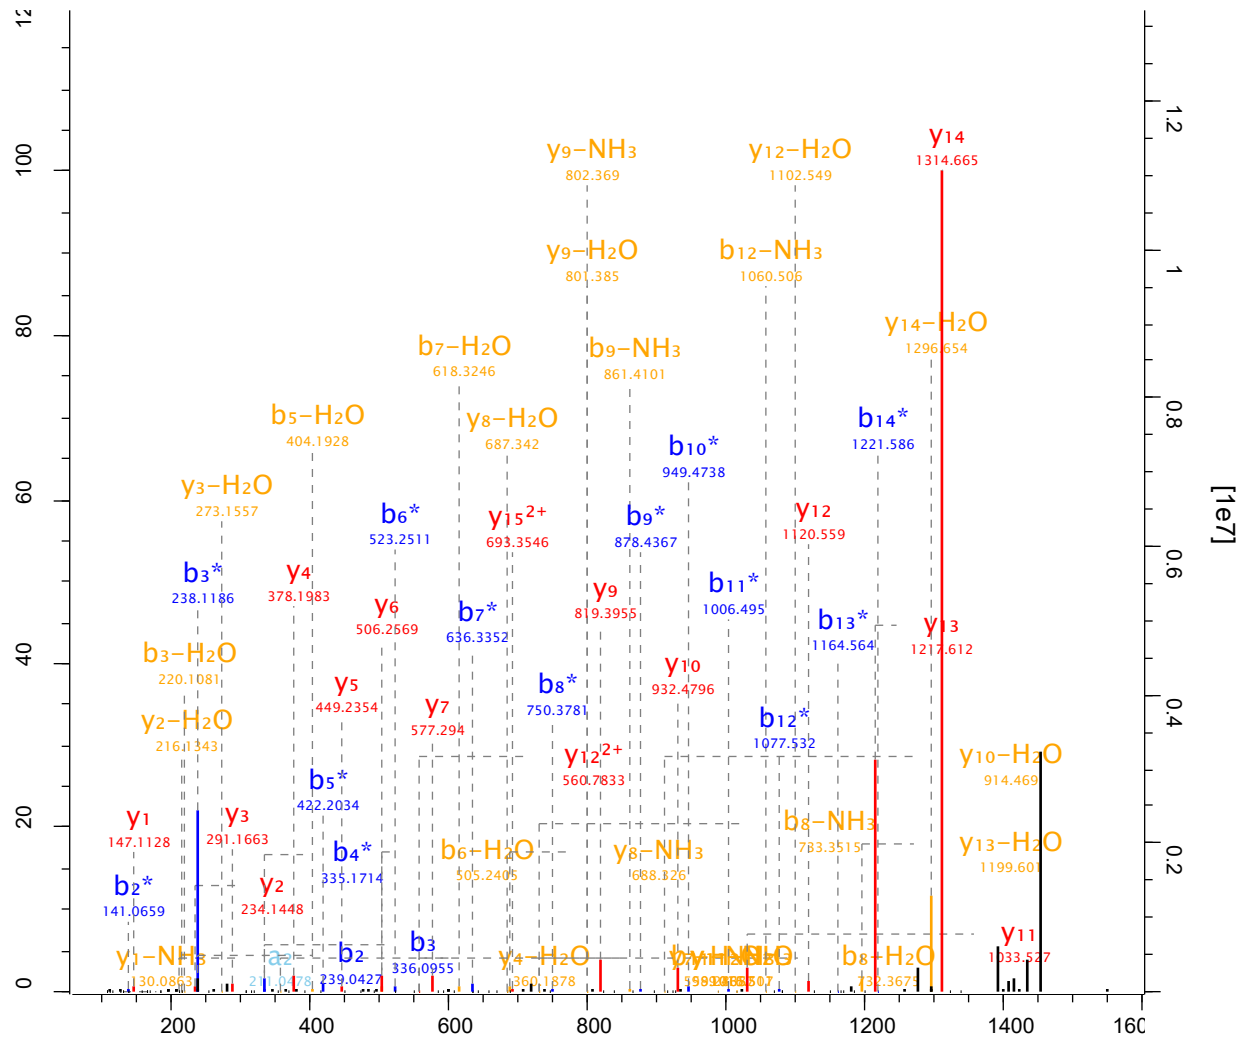

| ph | y15 <sup>2+</sup> | y14            | y13                         | y12                         | y11                         | y10                         | y9                          | y7                          |                              | y6                           | y5                           | y4                           | y3                           | y2 |
|----|-------------------|----------------|-----------------------------|-----------------------------|-----------------------------|-----------------------------|-----------------------------|-----------------------------|------------------------------|------------------------------|------------------------------|------------------------------|------------------------------|----|
| S  | A                 | P              | P                           | S                           | T                           | L                           | N                           | Q                           | A                            | G                            | A                            | S                            | G                            | S  |
| -  | b <sub>2</sub>    | b <sub>3</sub> | b <sub>4</sub> <sup>*</sup> | b <sub>5</sub> <sup>*</sup> | b <sub>6</sub> <sup>*</sup> | b <sub>7</sub> <sup>*</sup> | b <sub>8</sub> <sup>*</sup> | b <sub>9</sub> <sup>*</sup> | b <sub>10</sub> <sup>*</sup> | b <sub>11</sub> <sup>*</sup> | b <sub>12</sub> <sup>*</sup> | b <sub>13</sub> <sup>*</sup> | b <sub>14</sub> <sup>*</sup> |    |

y1  
K

Raw file Scan Method Score m/z  
 sys\_02\_2 7520 FTMS; HCD 86.29 535.72

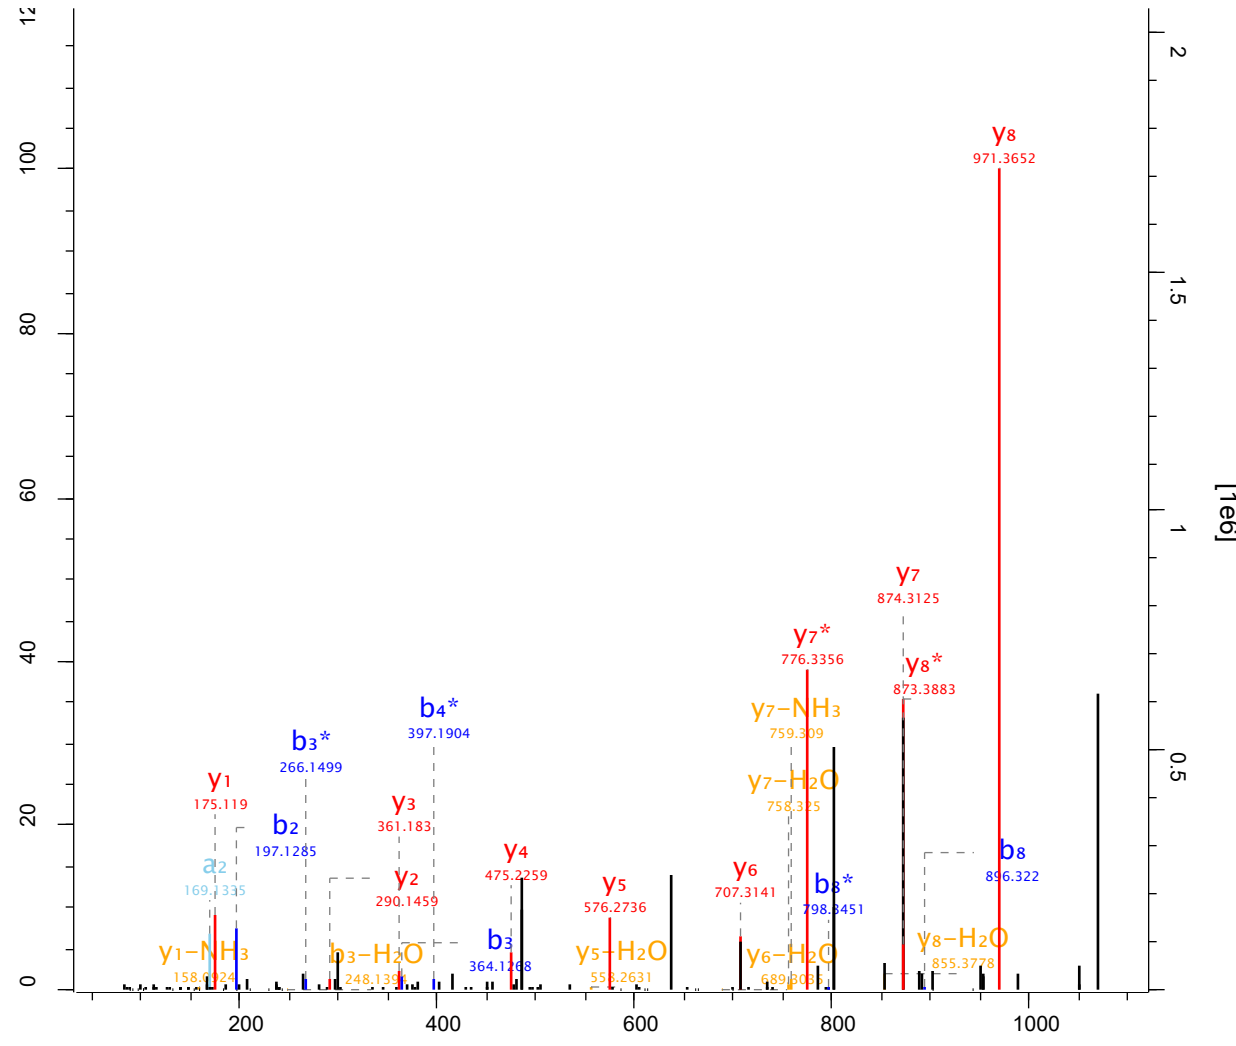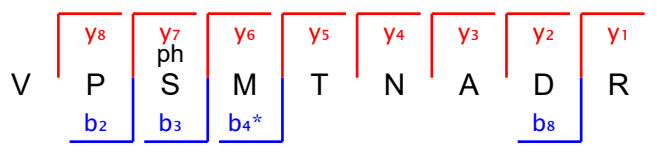

Raw file Scan Method Score m/z  
 sys\_02\_2 7765 FTMS; HCD 102.21 648.94

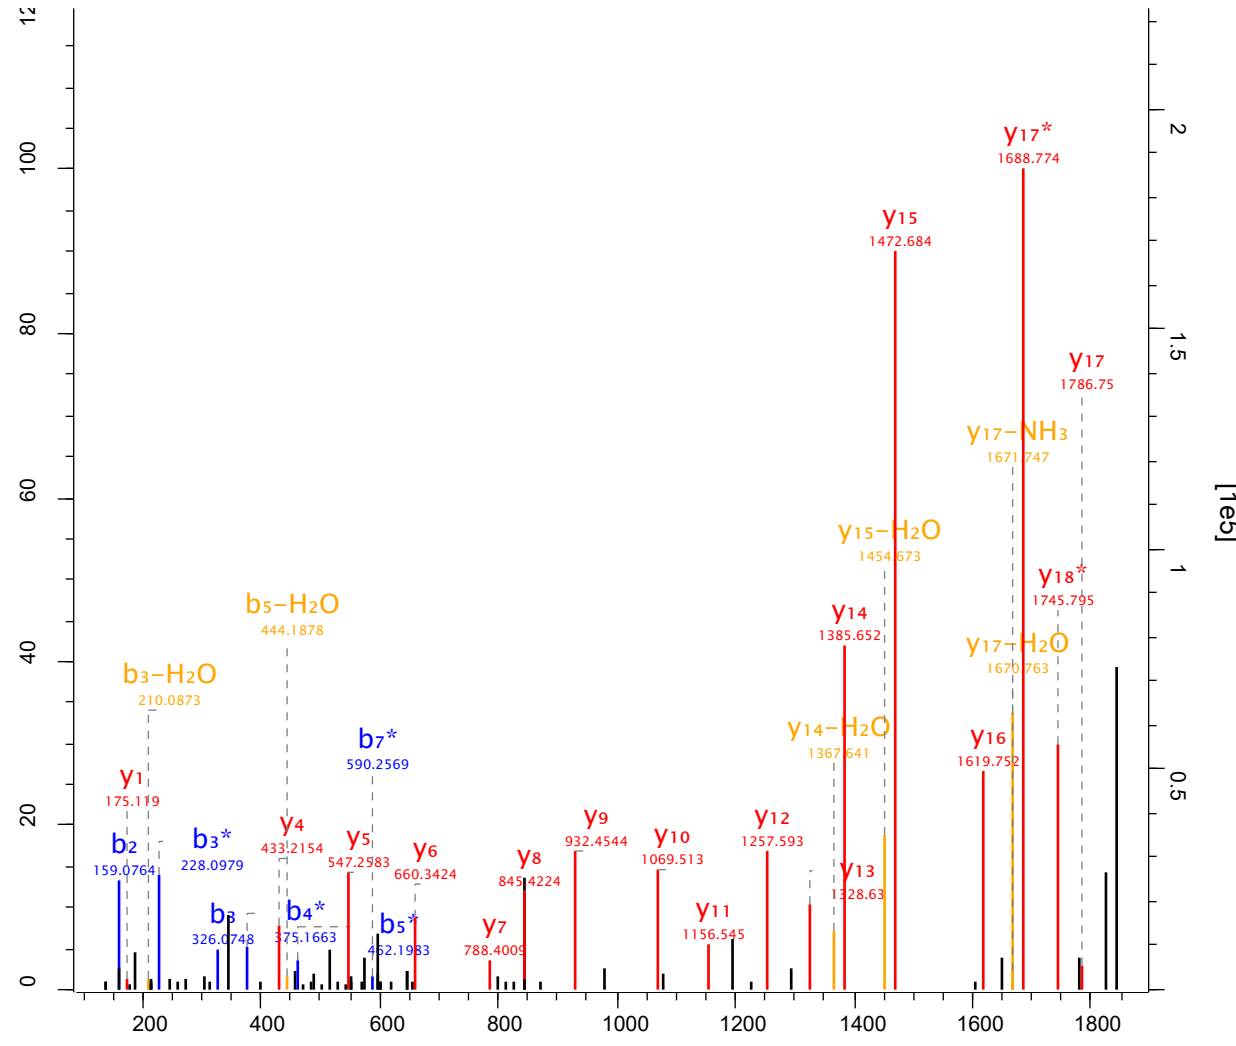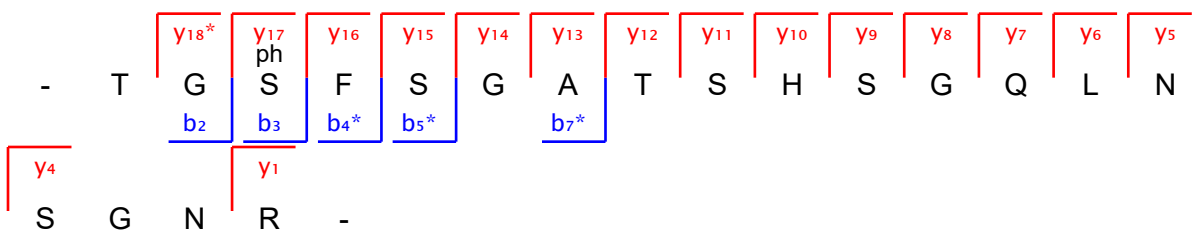

Raw file Scan Method Score m/z  
 sys\_02\_2 7806 FTMS; HCD 83.4 656.26

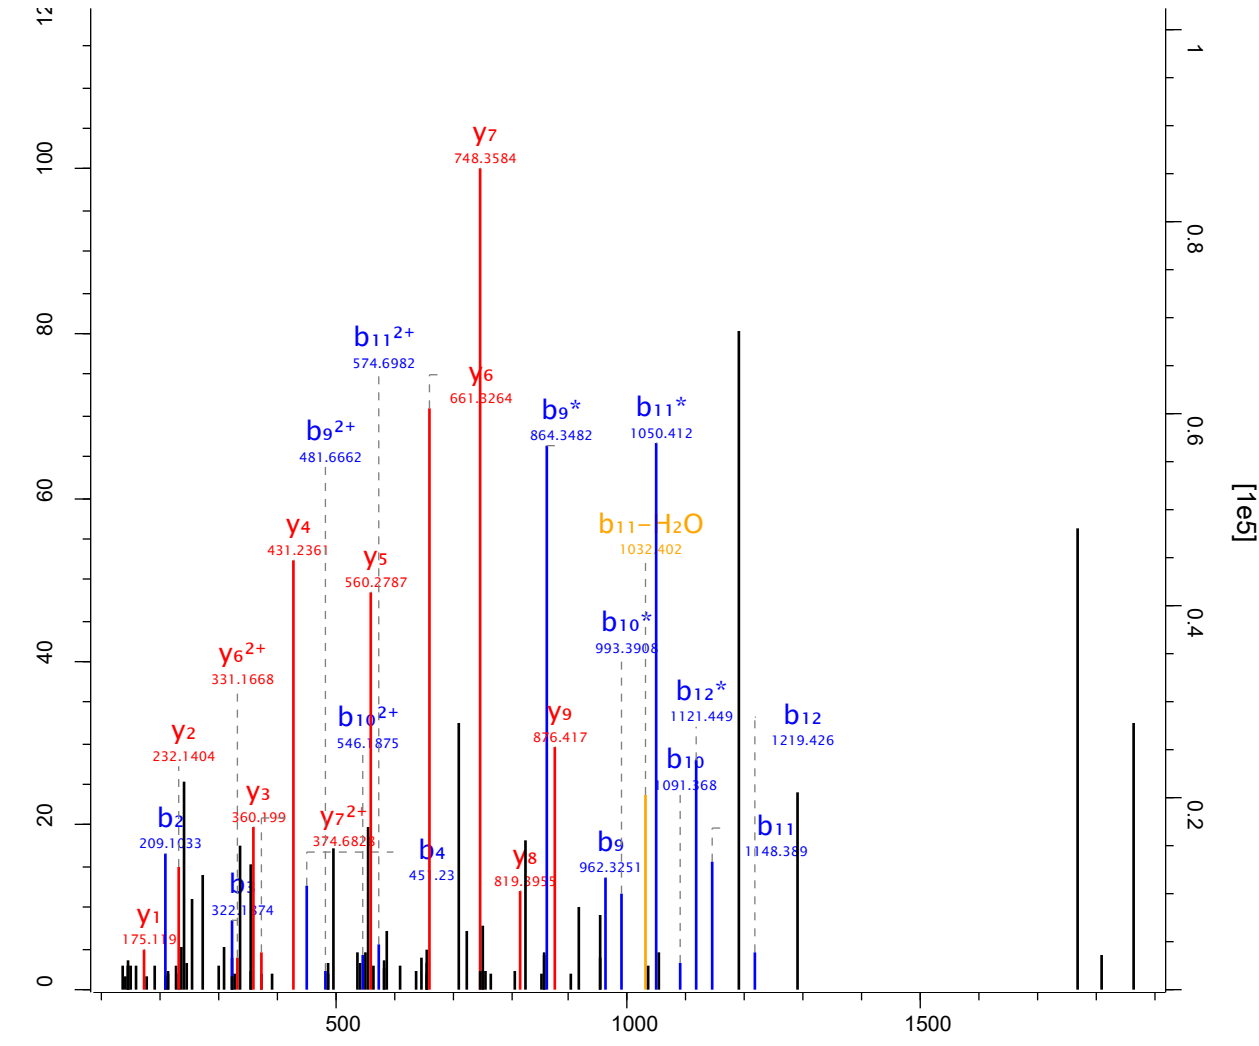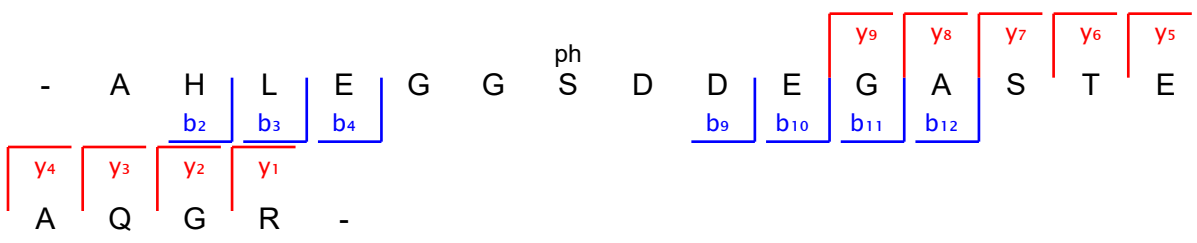

| Raw file | Scan | Method    | Score | m/z    |
|----------|------|-----------|-------|--------|
| sys_02_2 | 7947 | FTMS; HCD | 41.54 | 478.56 |

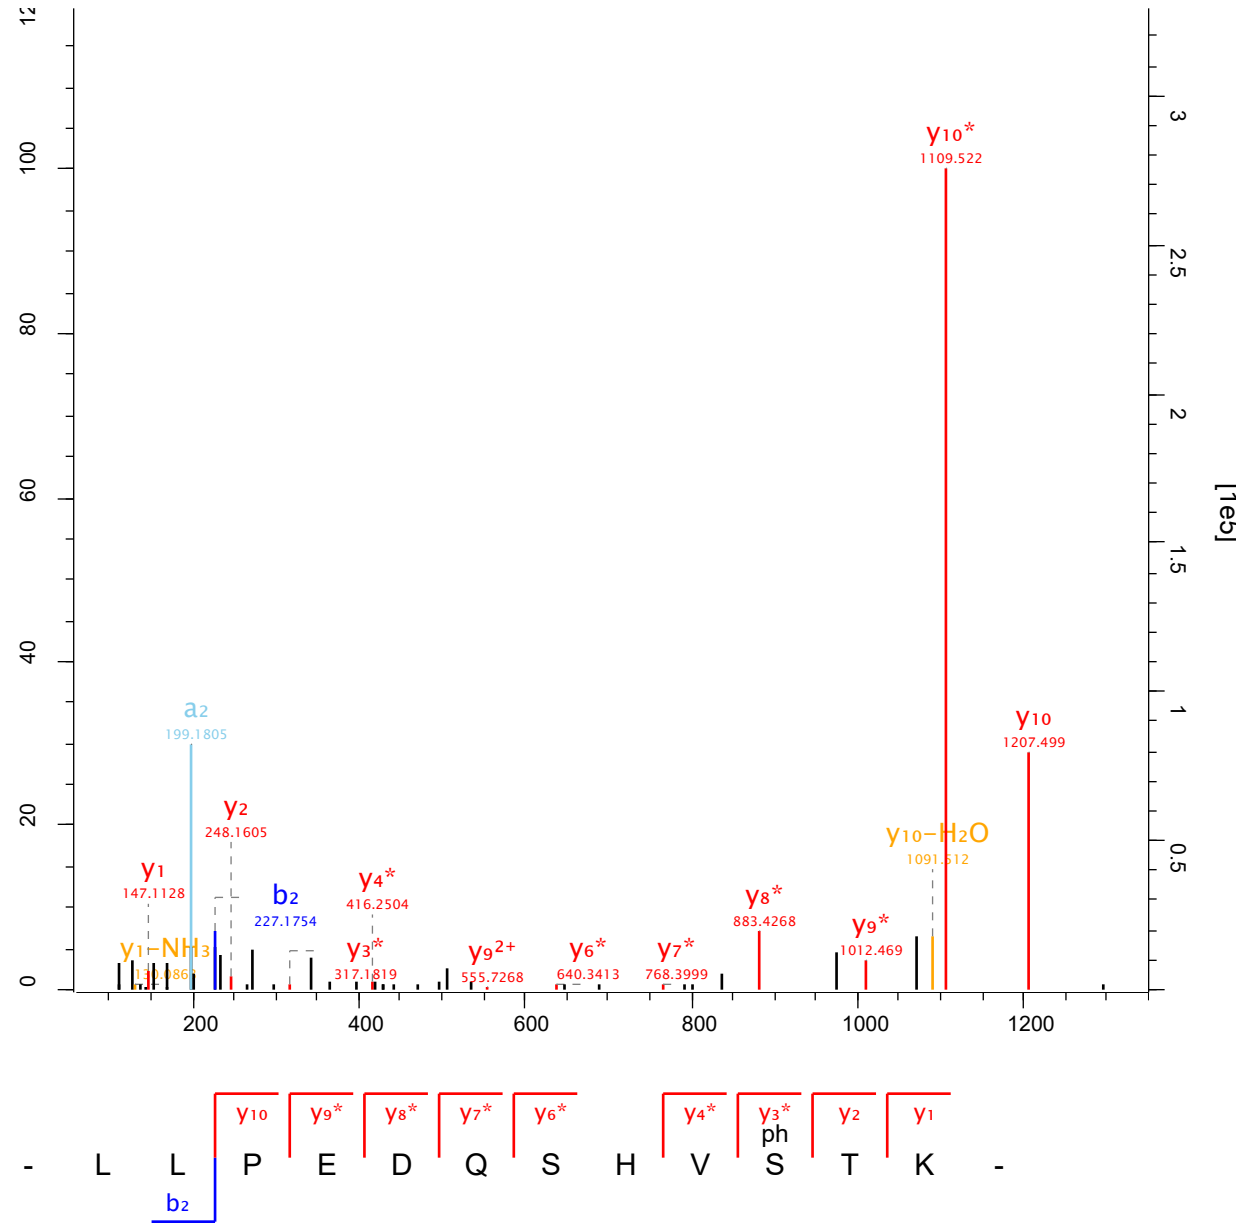

- L L P E D Q S H V S T K -

Fragmentation series indicated by brackets above the sequence:

- $y_{10}$  (from L)
- $y_9^*$  (from P)
- $y_8^*$  (from E)
- $y_7^*$  (from D)
- $y_6^*$  (from Q)
- $y_4^*$  (from V)
- $y_3^*$  (from S)
- $y_2$  (from T)
- $y_1$  (from K)

Additional fragmentation series indicated by brackets below the sequence:

- $b_2$  (from L)

Raw file Scan Method Score m/z  
 sys\_02\_2 8030 FTMS; HCD 46.32 450.87

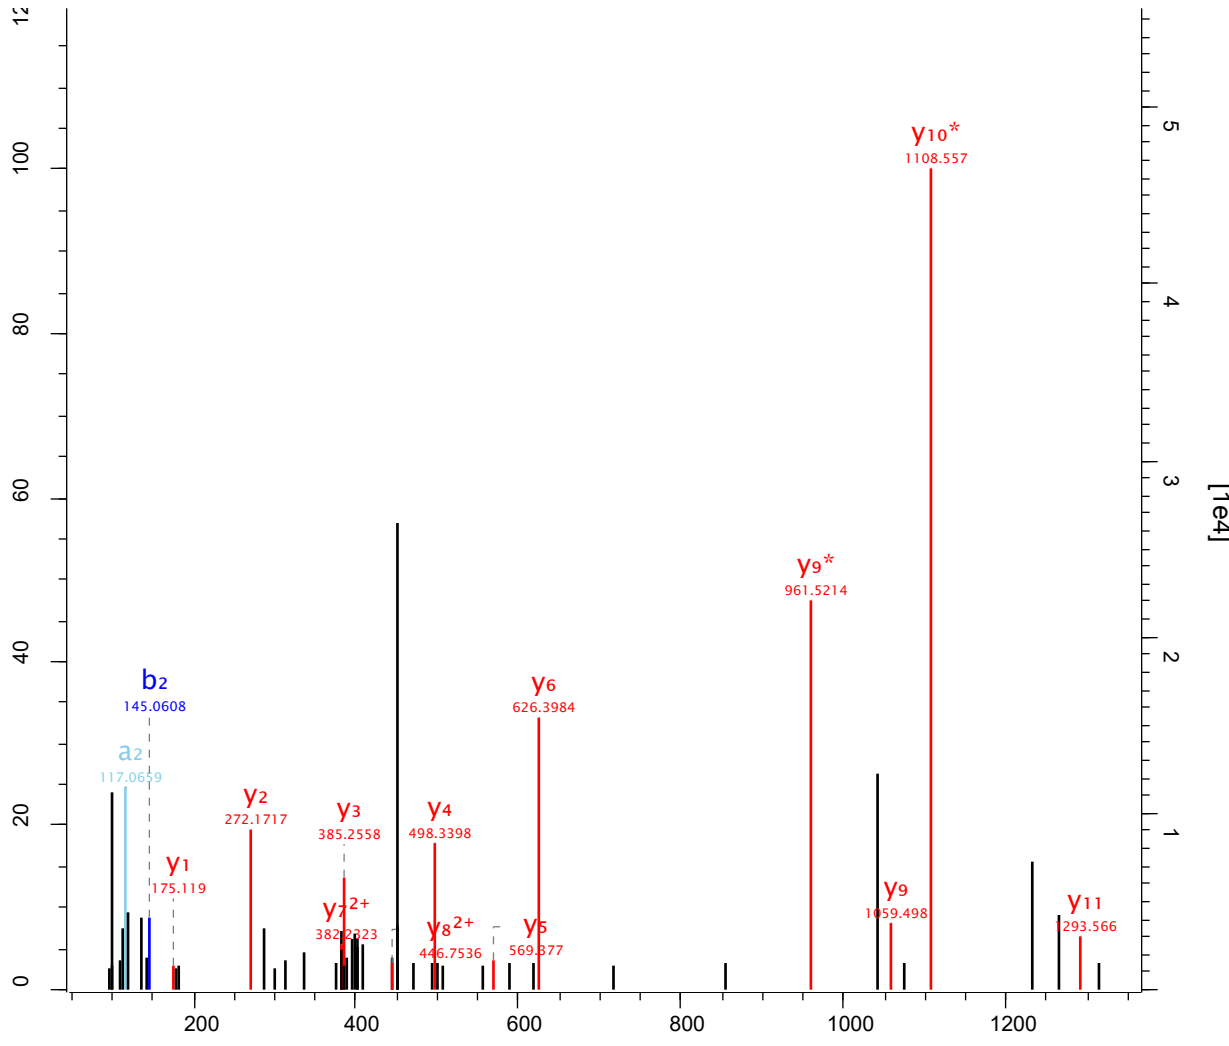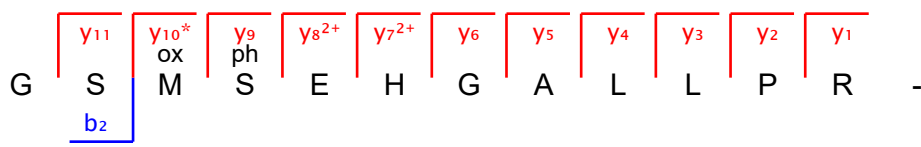



Raw file Scan Method Score m/z  
 sys\_02\_2 8055 FTMS; HCD 66.27 552.75

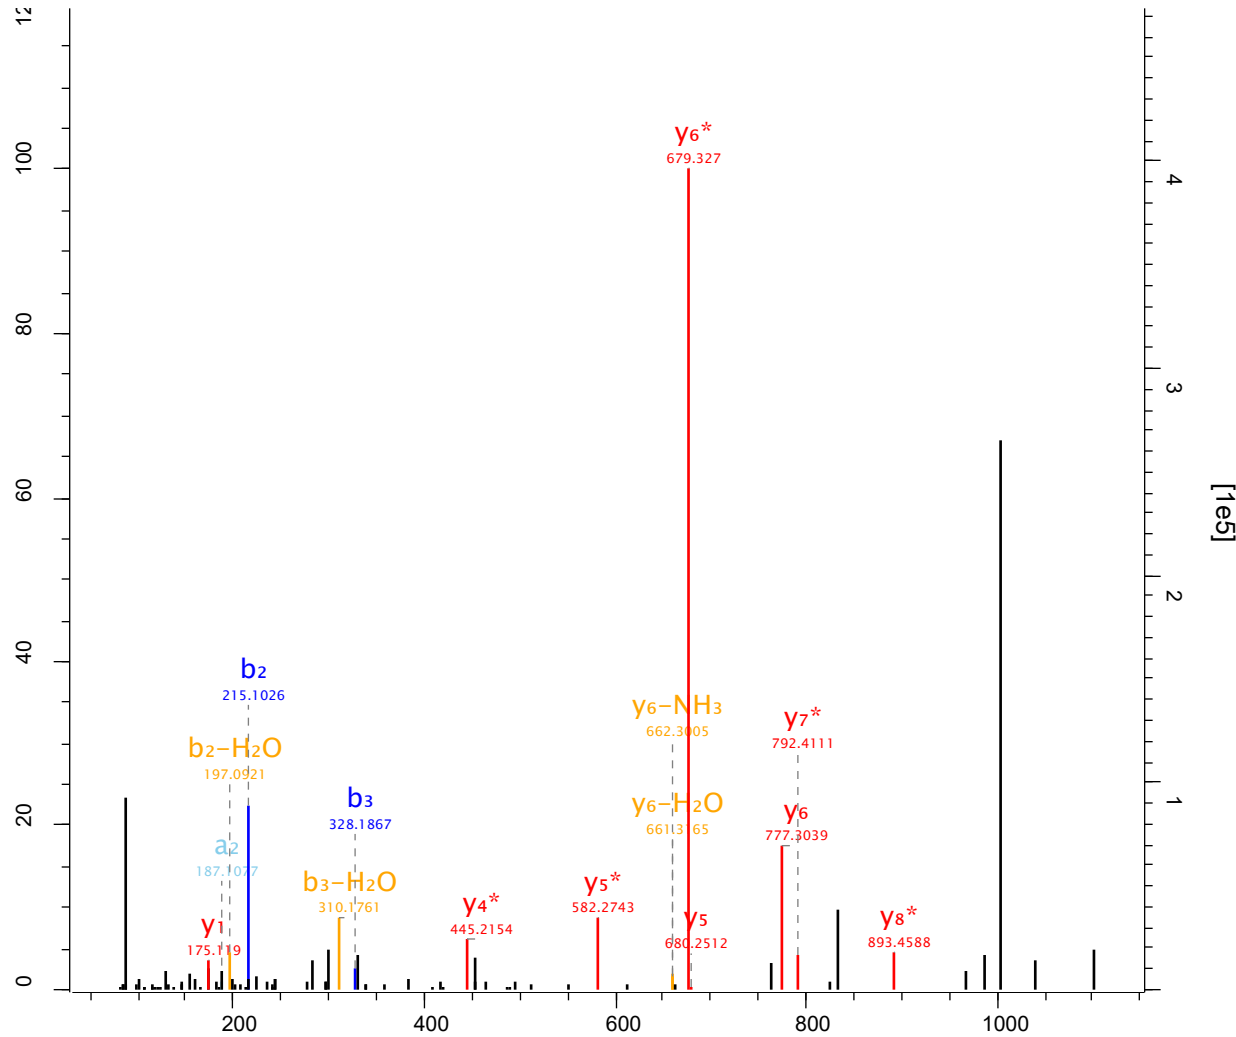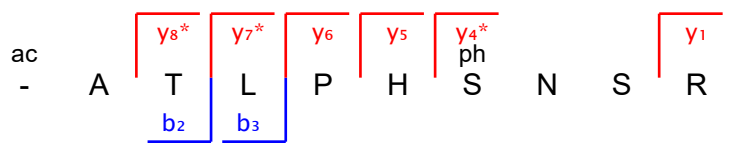

Raw file Scan Method Score m/z  
 sys\_02\_2 8097 FTMS; HCD 104.26 481.23

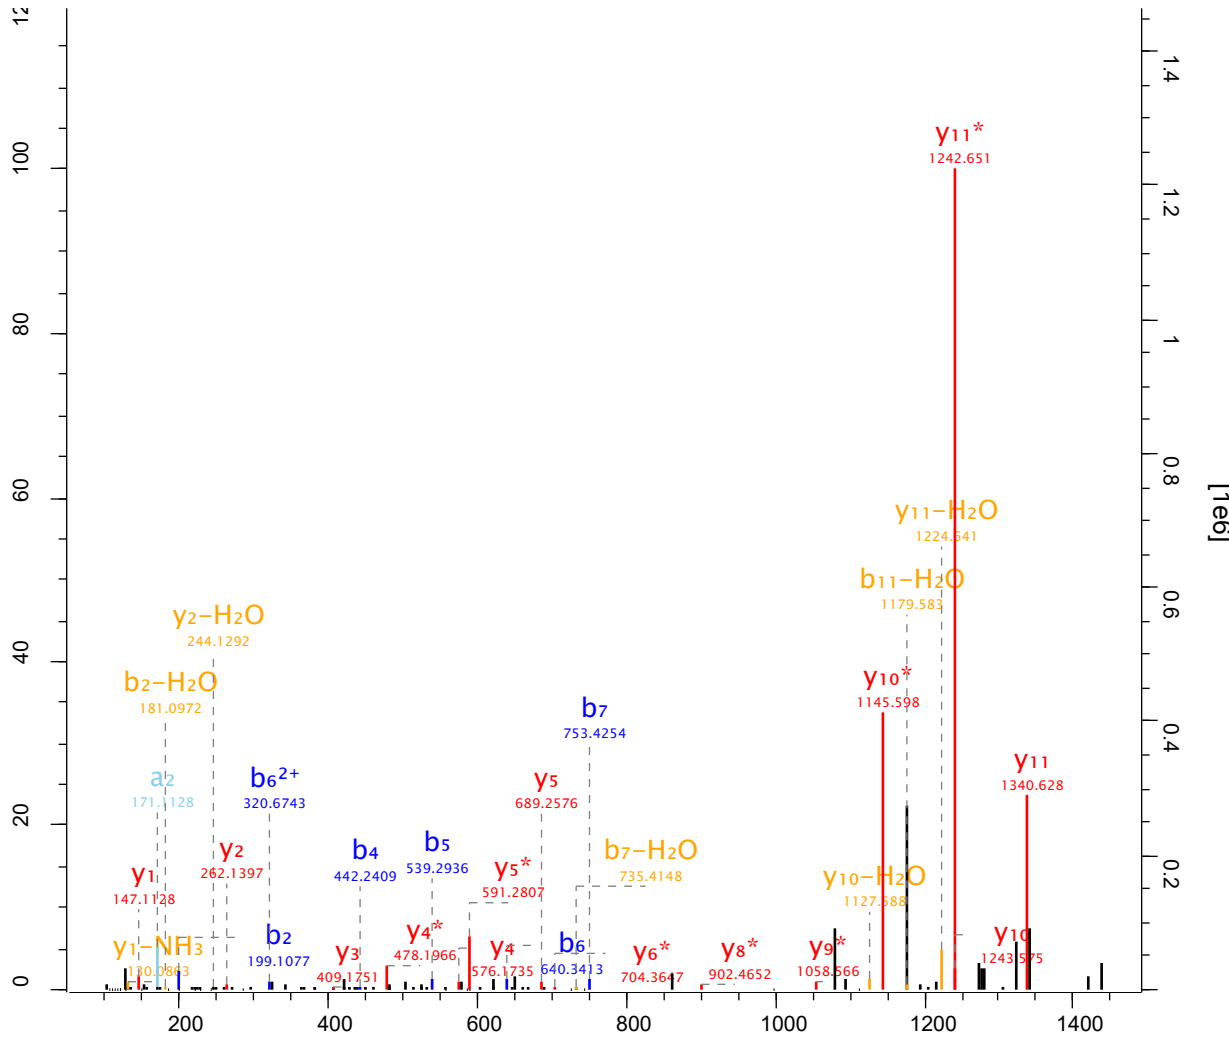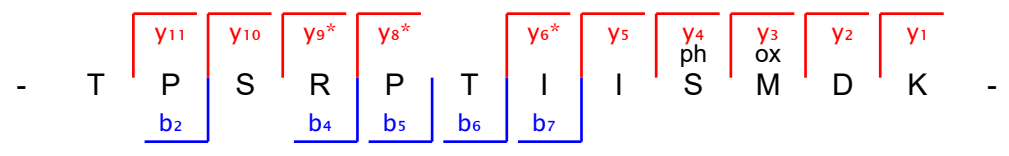

Raw file Scan Method Score m/z  
 sys\_02\_2 8101 FTMS; HCD 42.64 683.6

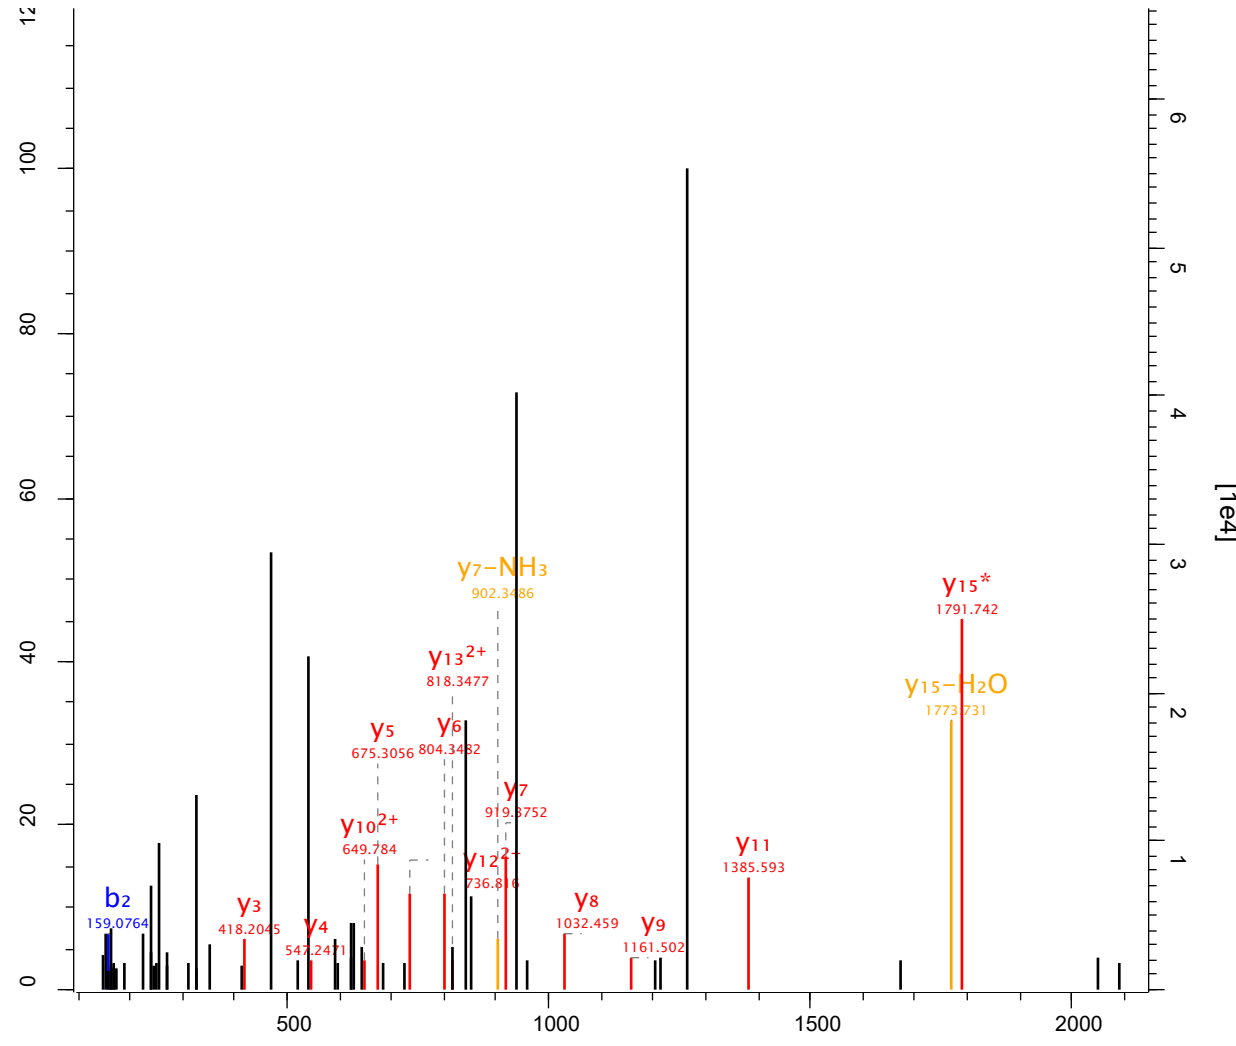

- A S S Y S S H E I D E Q E N  
 b2 y15\* ph y13^2+ y12^2+ y11 y10^2+ y9 y8 y7 y6 y5 y4 y3  
 E R -

Raw file Scan Method Score m/z  
 sys\_02\_2 8104 FTMS; HCD 181.97 703.82

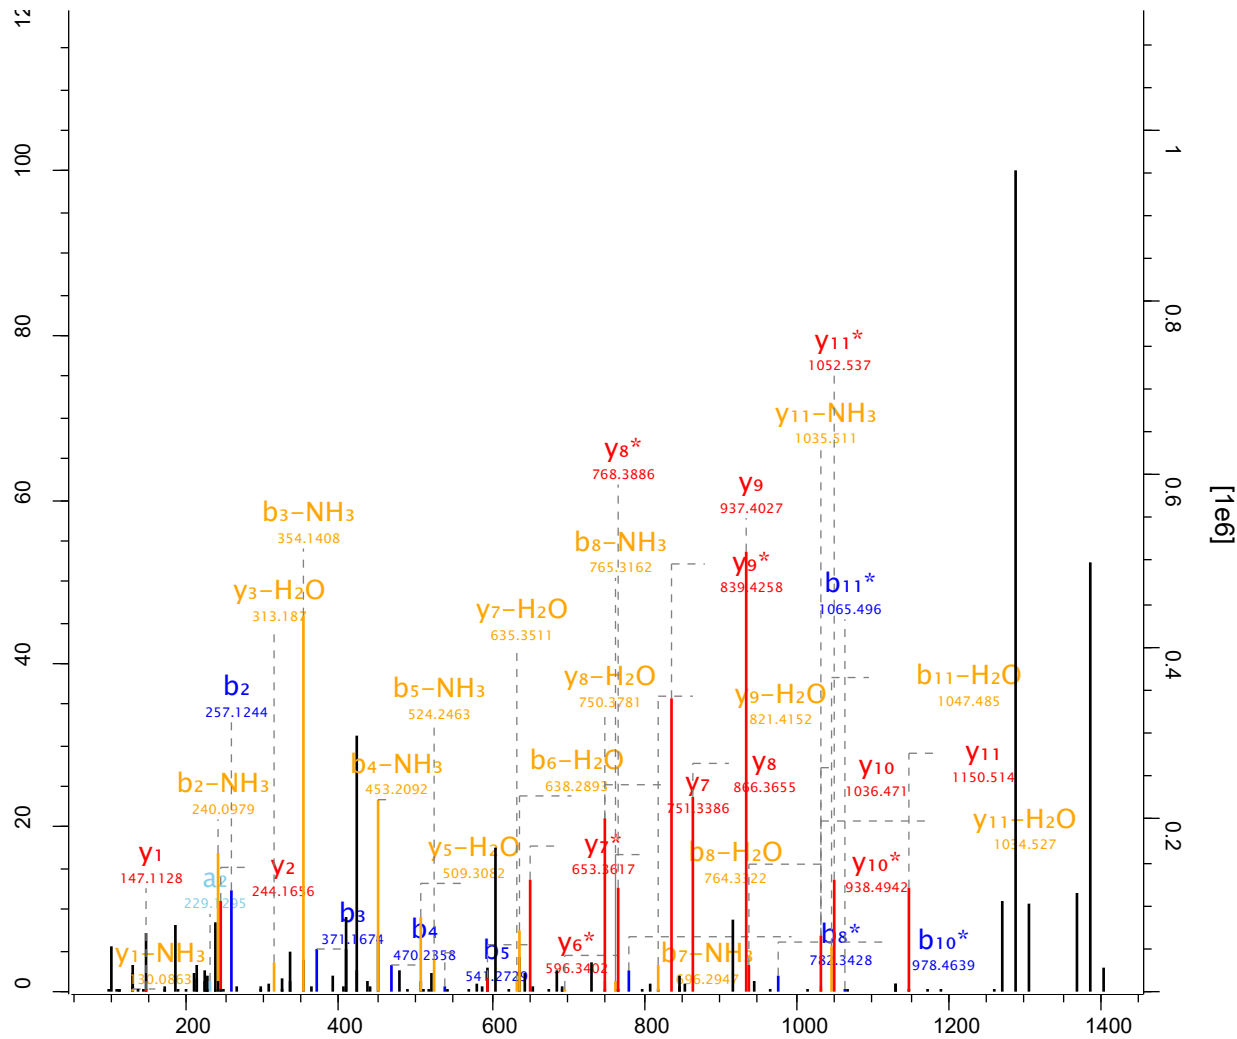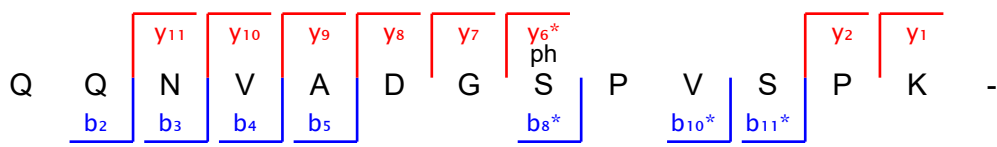

Raw file Scan Method Score m/z  
 sys\_02\_2 8199 FTMS; HCD 115.56 796.86

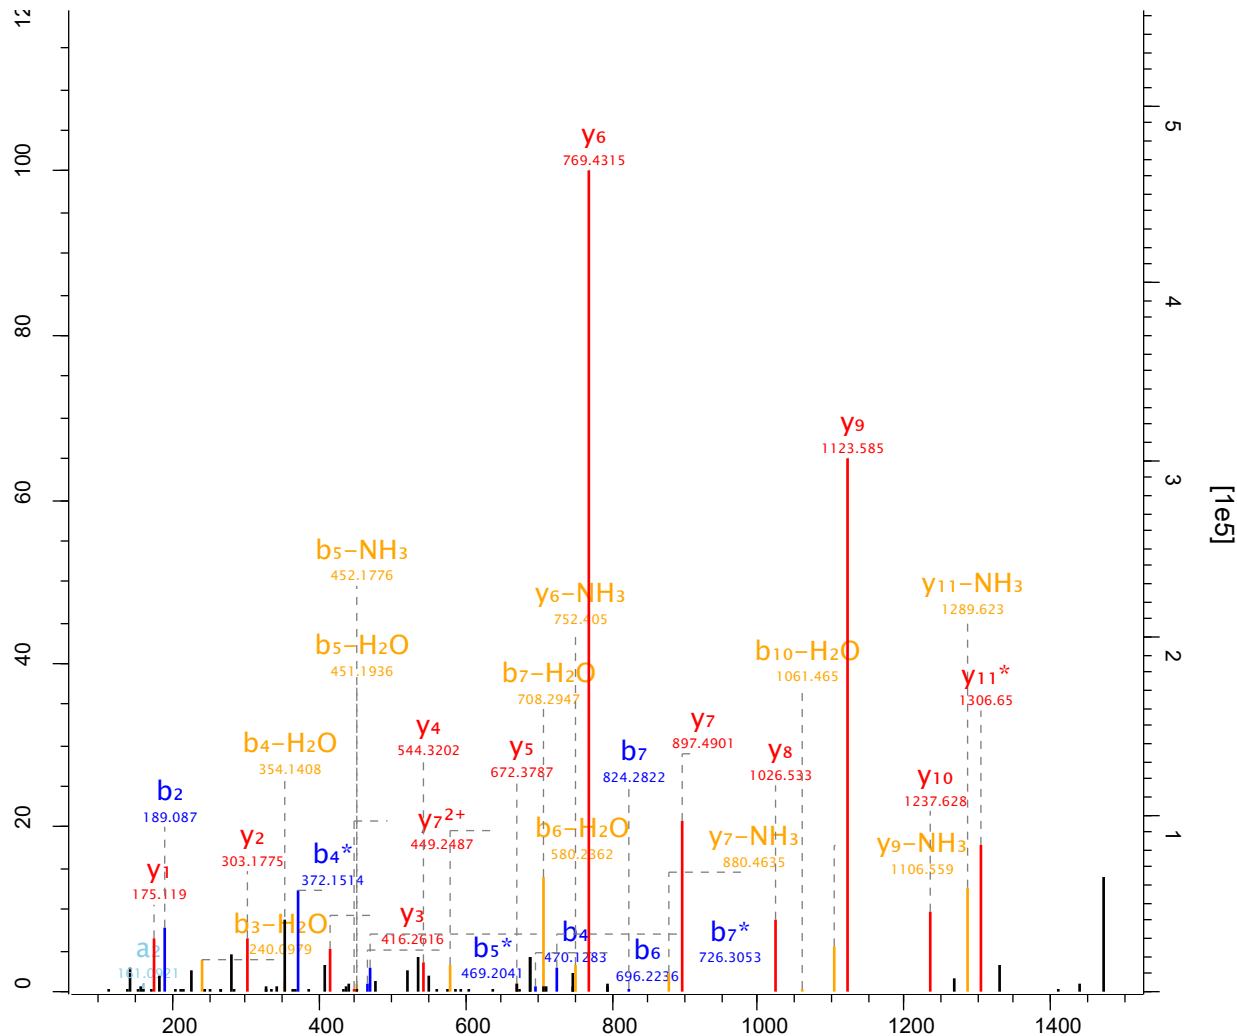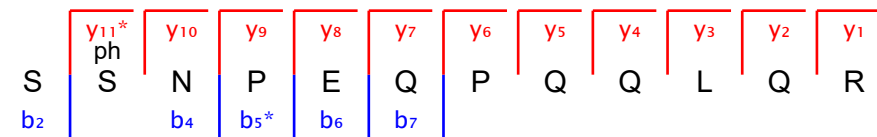

| Raw file | Scan | Method    | Score | m/z    |
|----------|------|-----------|-------|--------|
| sys_02_2 | 8382 | FTMS; HCD | 46.16 | 505.57 |

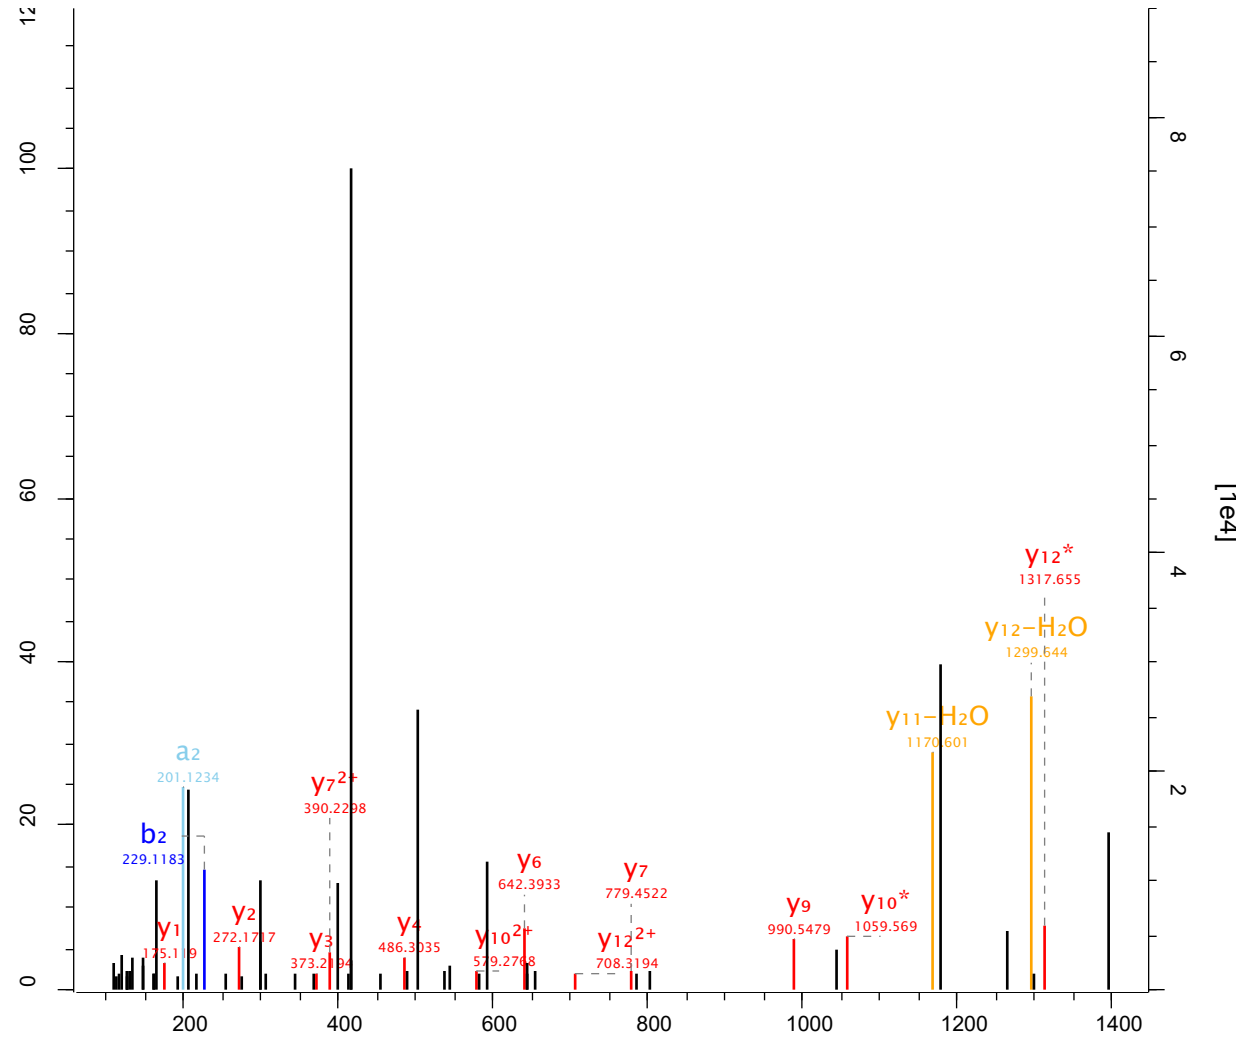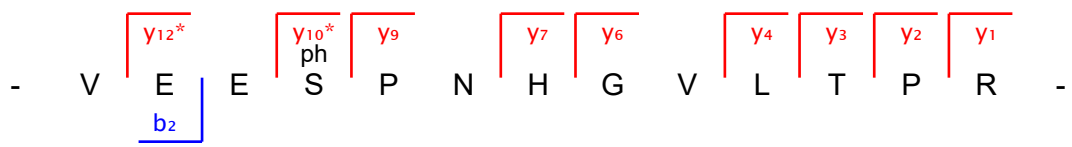

Raw file Scan Method Score m/z  
 sys\_02\_2 8410 FTMS; HCD 233.49 743.82

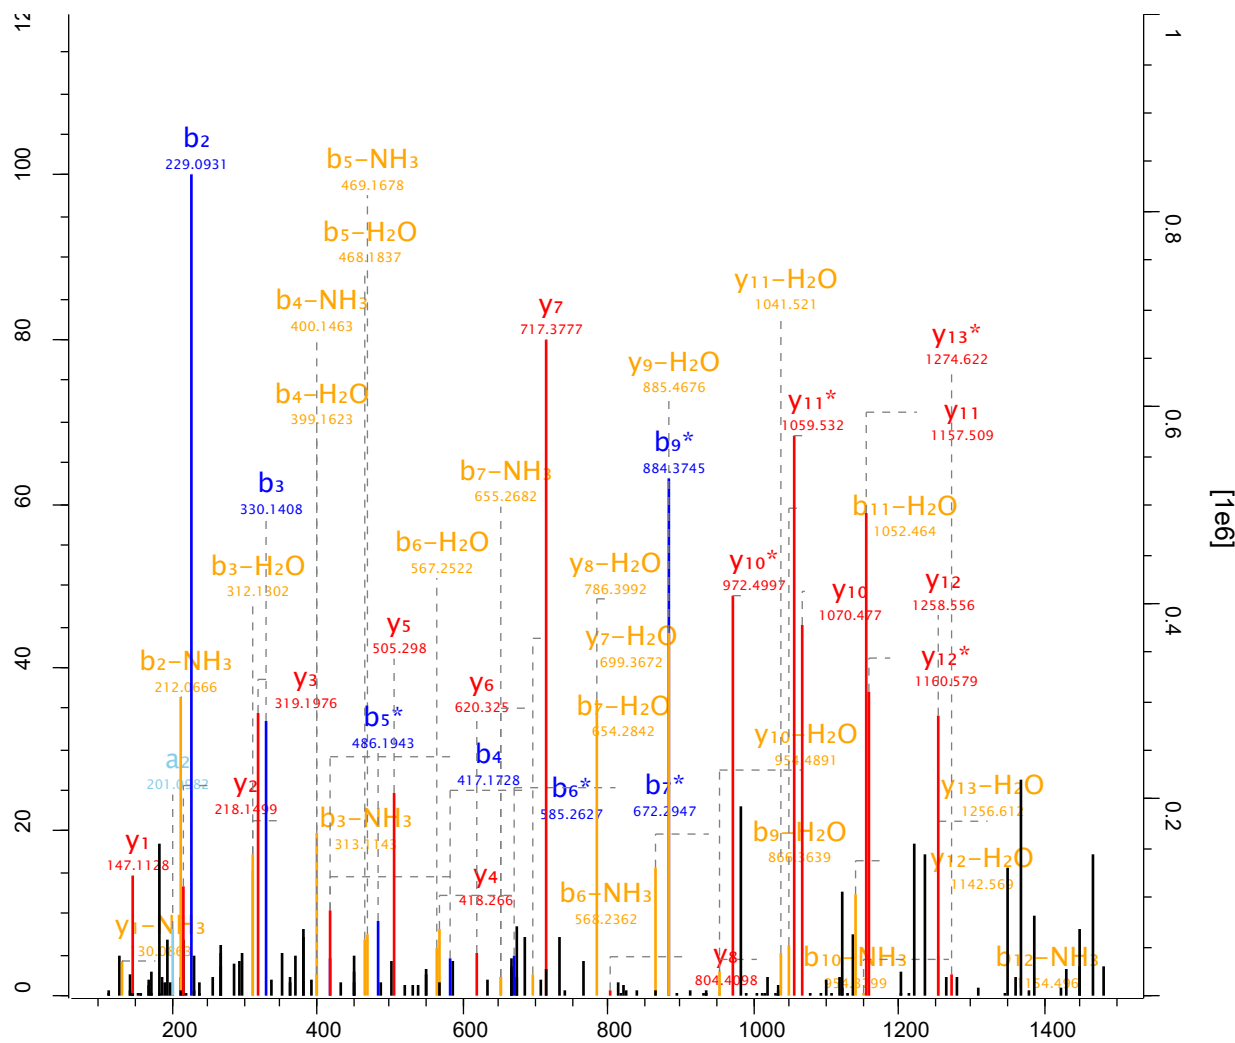

- N N T S S V S P D S V T A K -

b<sub>2</sub>
b<sub>3</sub>
b<sub>4</sub>
b<sub>5</sub><sup>\*</sup>
b<sub>6</sub><sup>\*</sup>
b<sub>7</sub><sup>\*</sup>
b<sub>9</sub><sup>\*</sup>
y<sub>13</sub><sup>\*</sup>
y<sub>12</sub>
y<sub>11</sub>
y<sub>10</sub><sup>ph</sup>
y<sub>8</sub>
y<sub>7</sub>
y<sub>6</sub>
y<sub>5</sub>
y<sub>4</sub>
y<sub>3</sub>
y<sub>2</sub>
y<sub>1</sub>

Raw file Scan Method Score m/z  
 sys\_02\_2 8459 FTMS; HCD 132.65 681.64

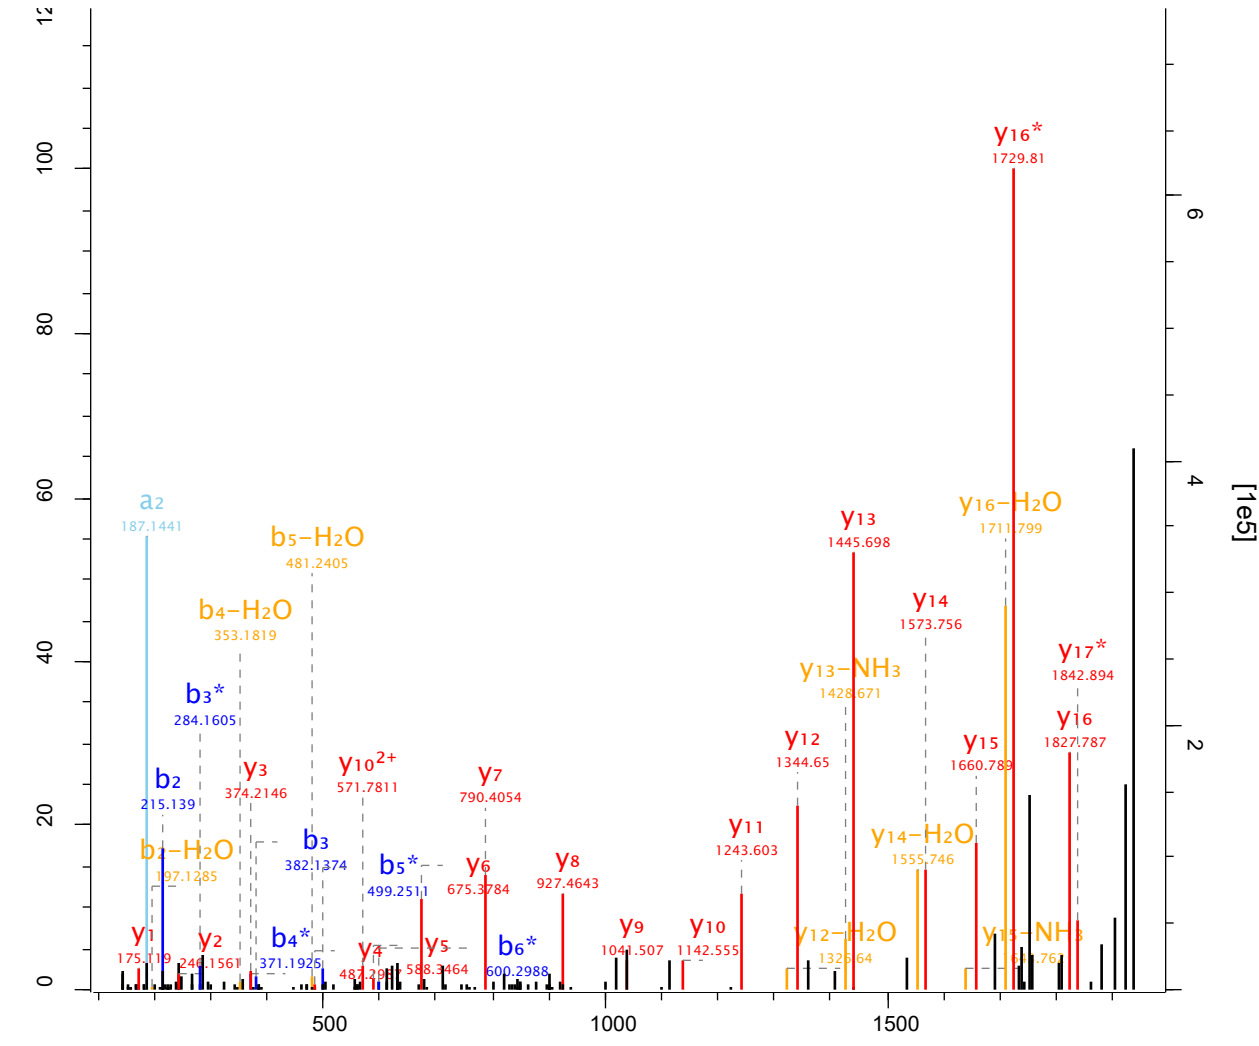

- T L S S Q T T T T N H D S T L  
 y17\* y16 ph y15 y14 y13 y12 y11 y10 y9 y8 y7 y6 y5 y4  
 b2 b3 b4\* b5\* b6\*  
 Q A R -



Raw file Scan Method Score m/z  
 sys\_02\_2 8520 FTMS; HCD 206.62 670.34

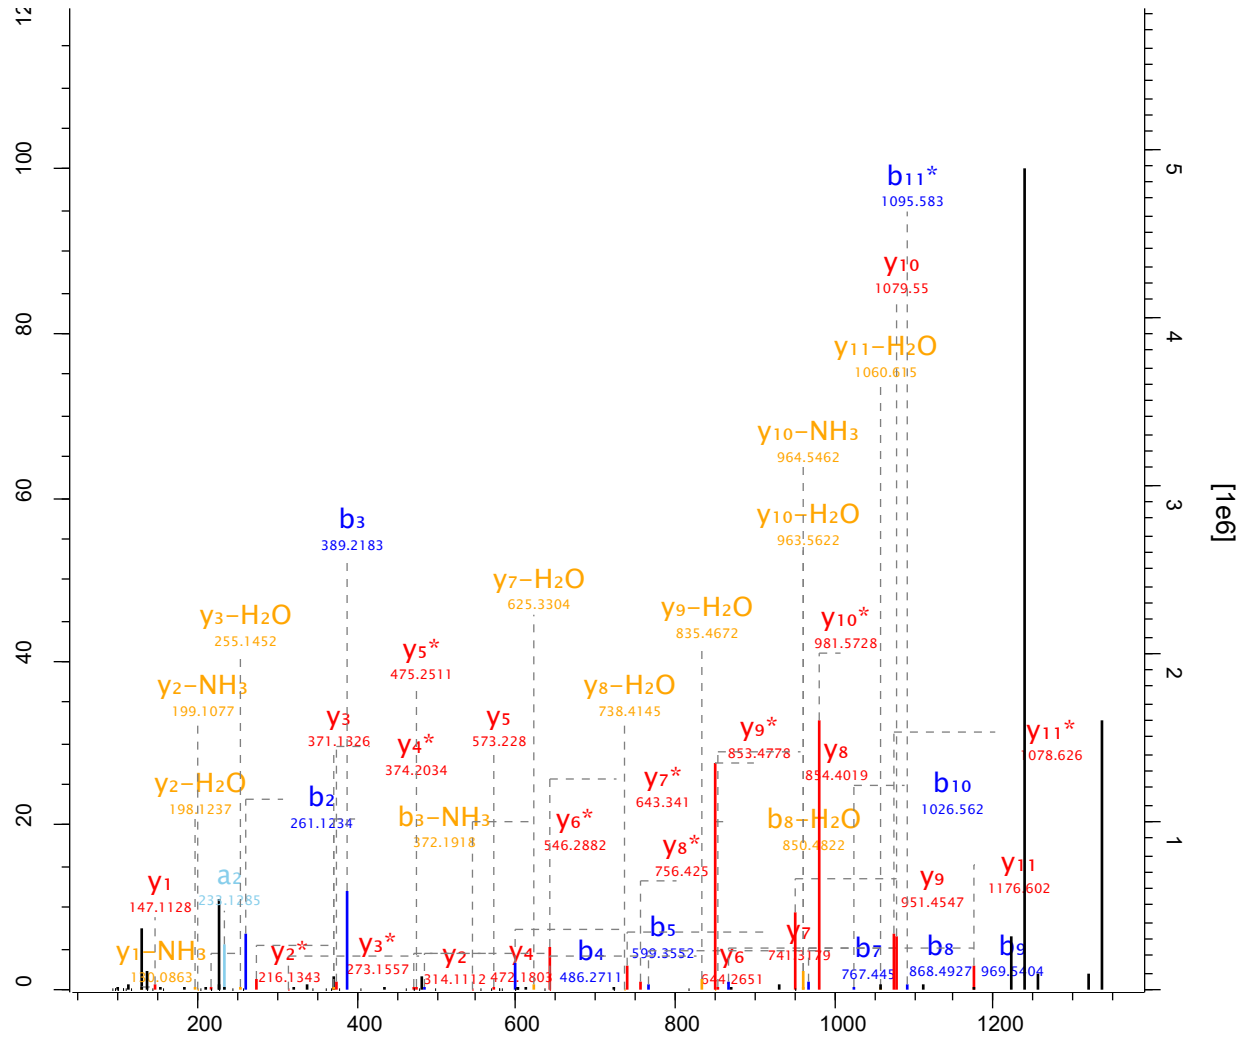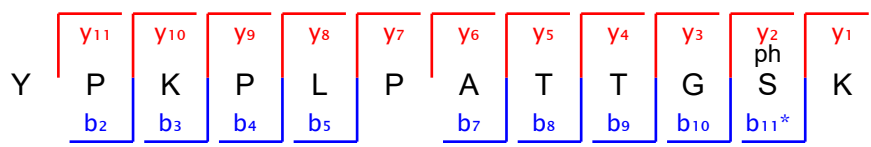

Raw file Scan Method Score m/z  
 sys\_02\_2 8578 FTMS; HCD 41.7 480.24

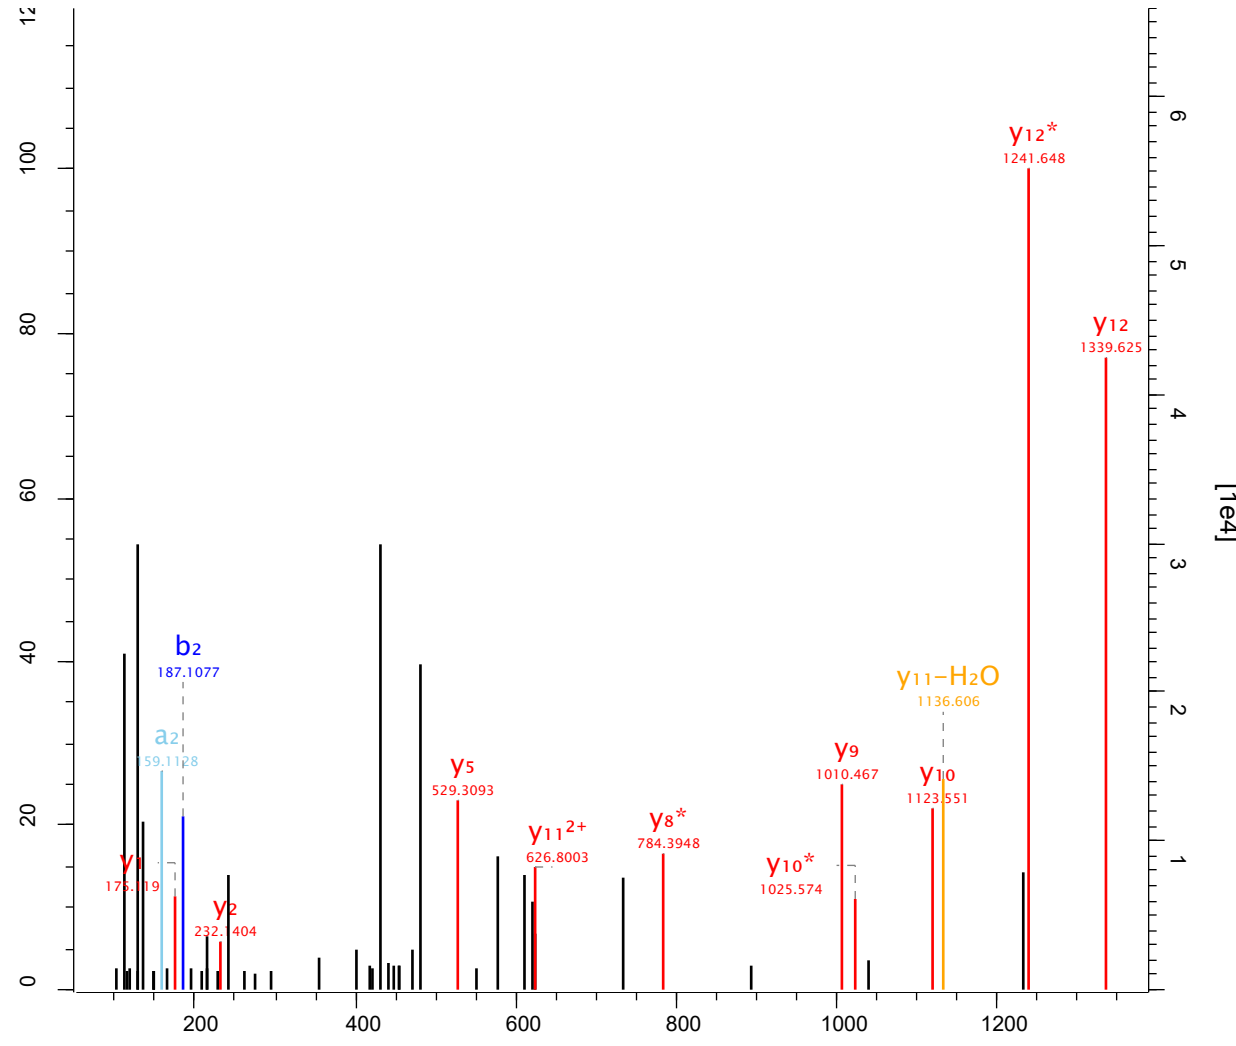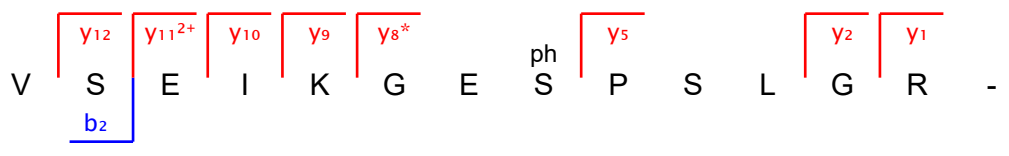

Raw file Scan Method Score m/z  
 sys\_02\_2 8660 FTMS; HCD 57.43 578.26

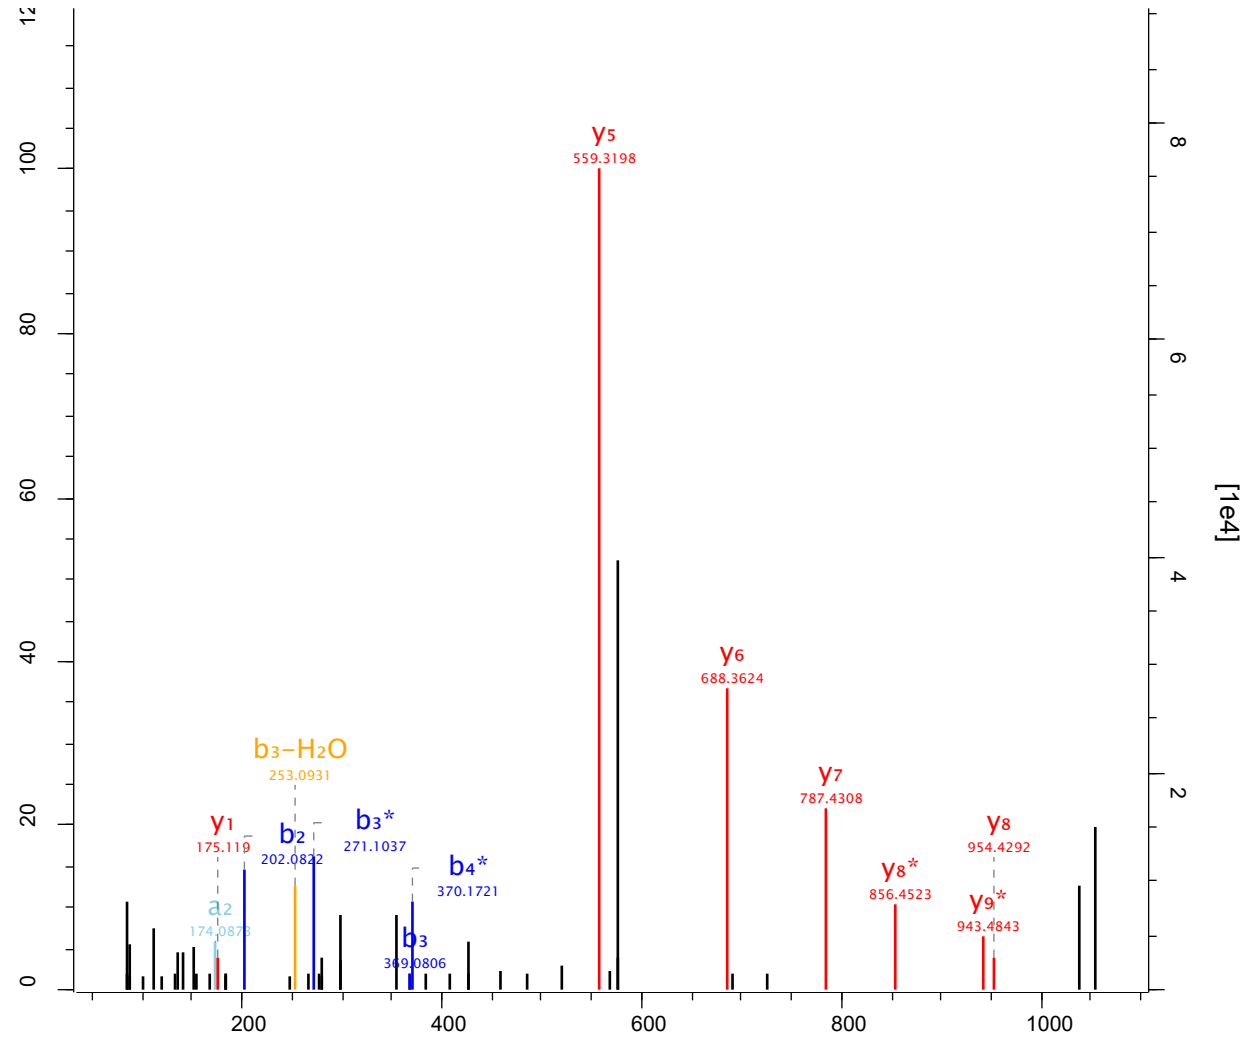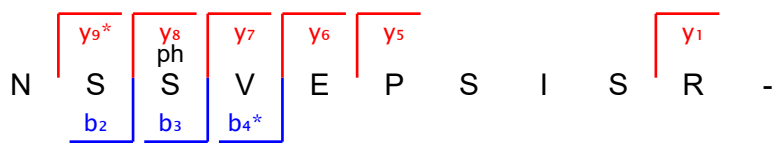

Raw file Scan Method Score m/z  
 sys\_02\_2 8851 FTMS; HCD 104.84 780.35

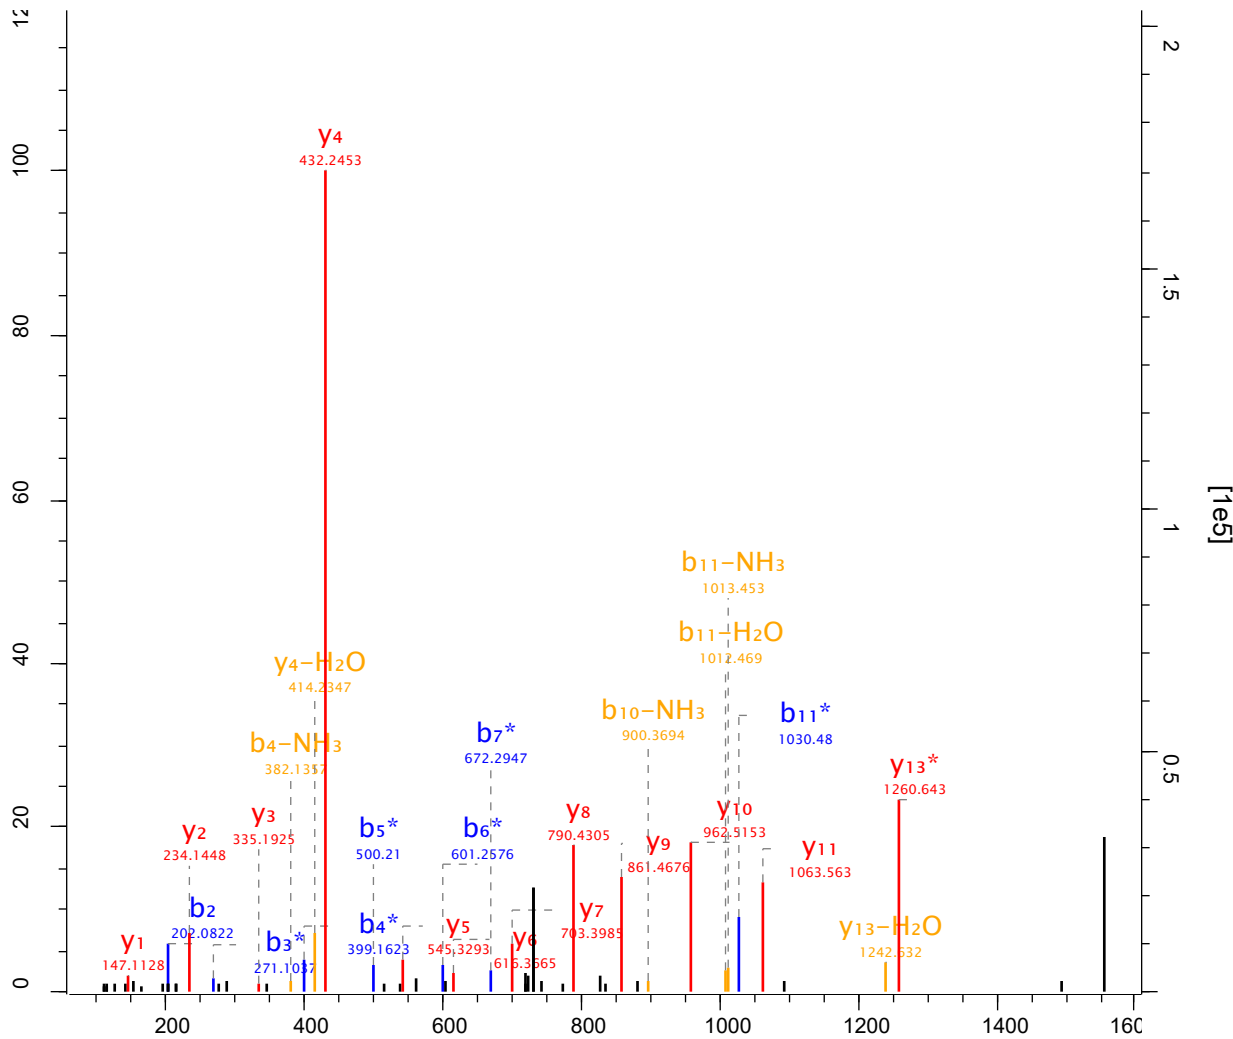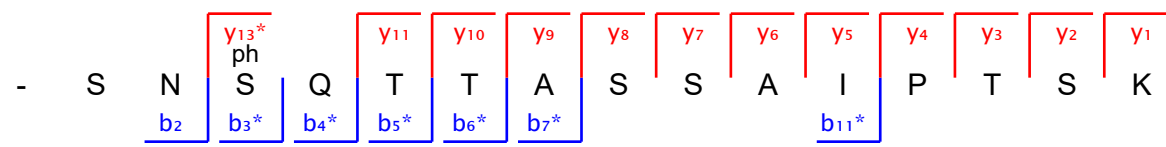

Raw file Scan Method Score m/z  
 sys\_02\_2 8890 FTMS; HCD 66.27 502.22

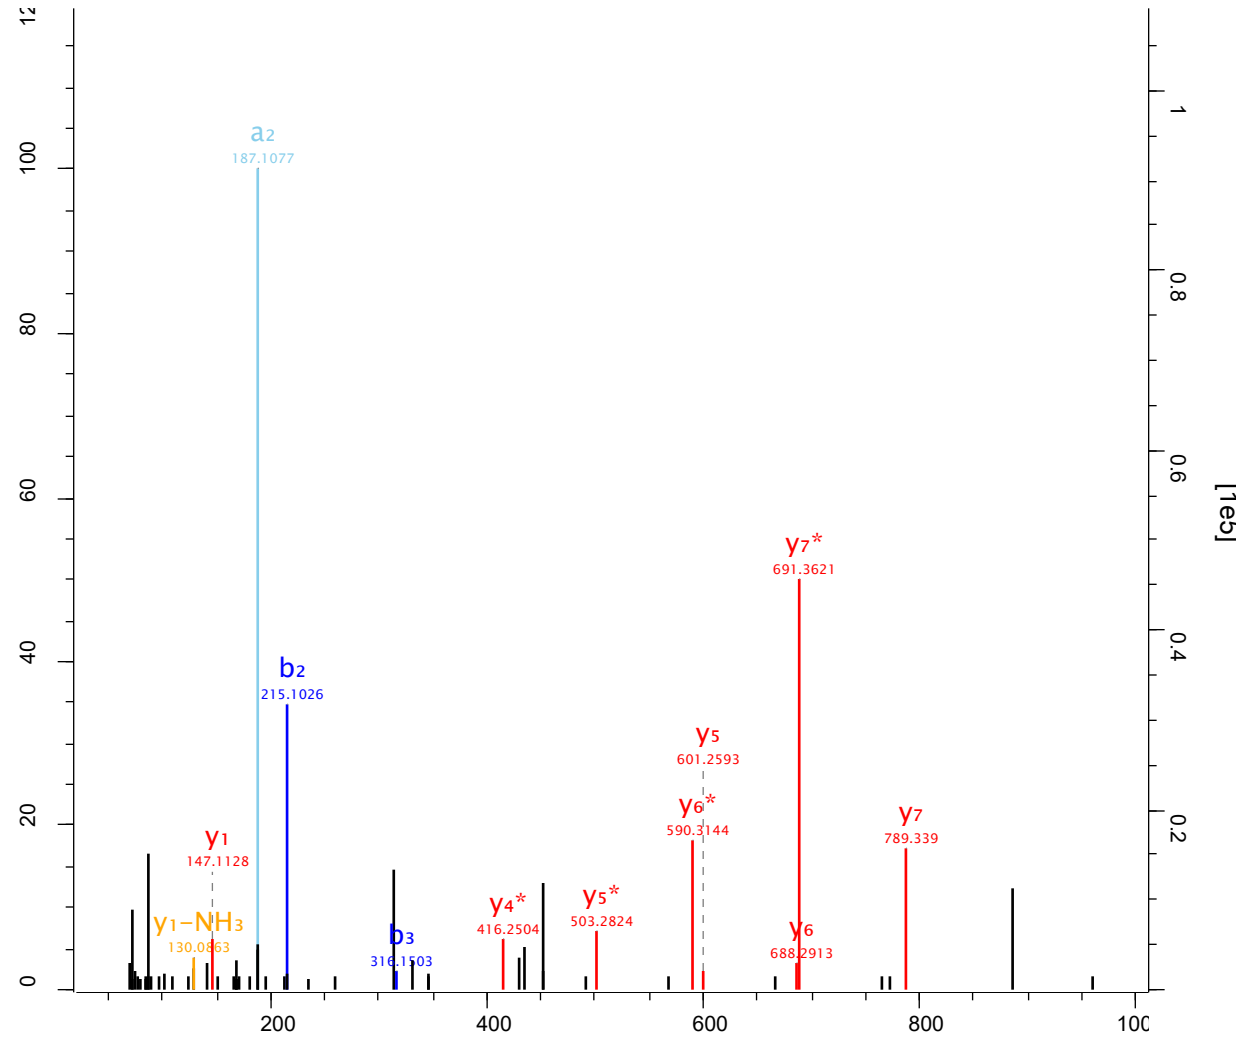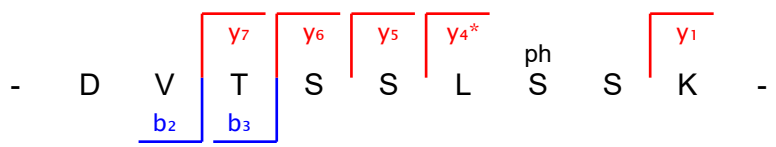

| Raw file | Scan | Method    | Score | m/z    |
|----------|------|-----------|-------|--------|
| sys_02_2 | 8902 | FTMS; HCD | 76.23 | 456.73 |

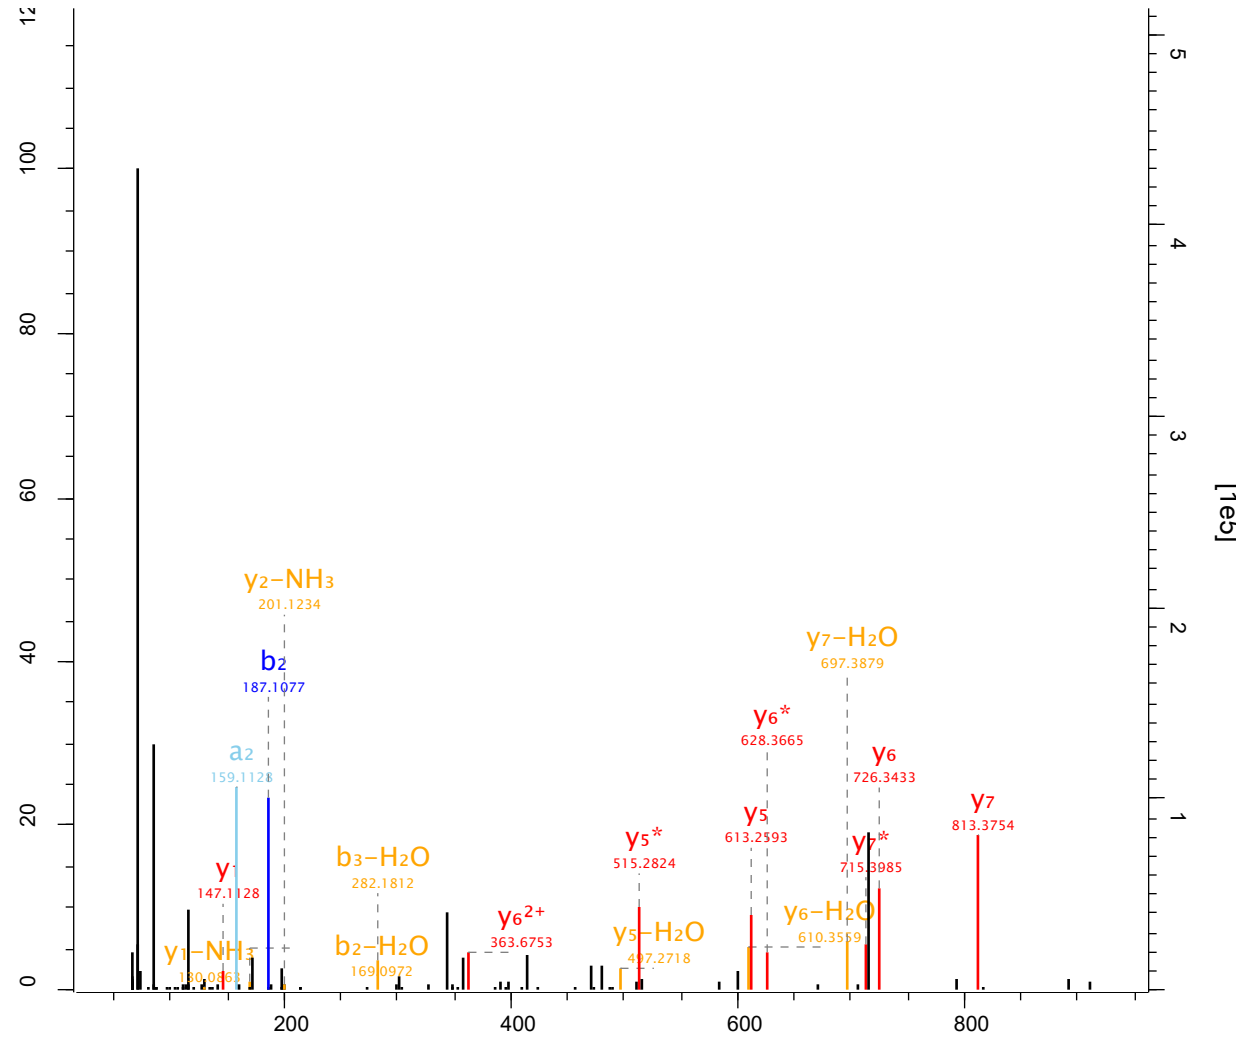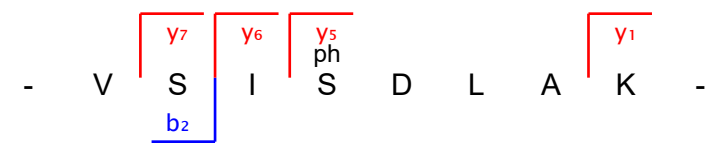

Raw file Scan Method Score m/z  
 sys\_02\_2 8969 FTMS; HCD 67.52 549.74

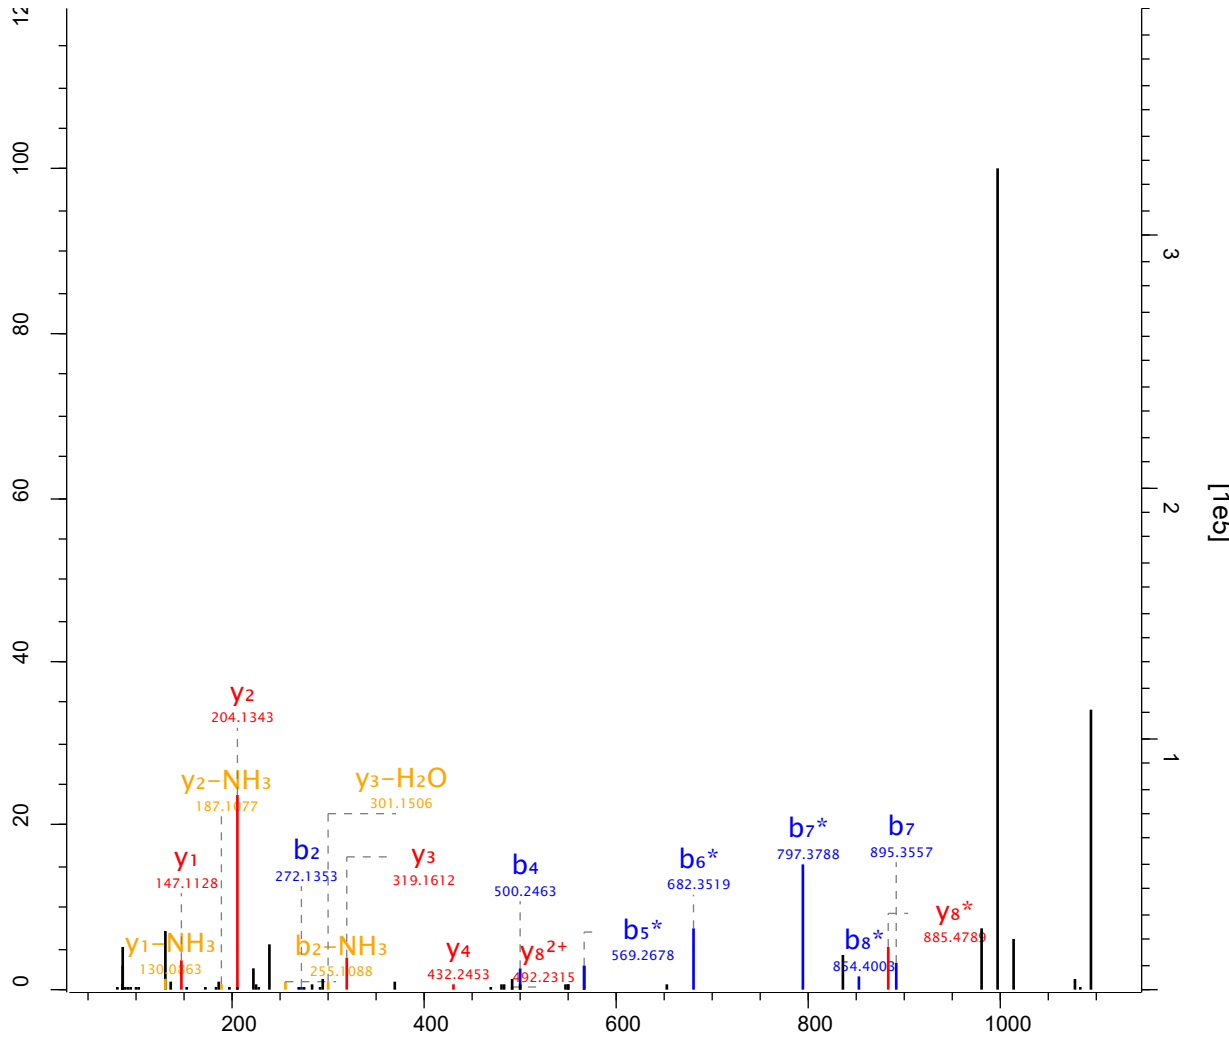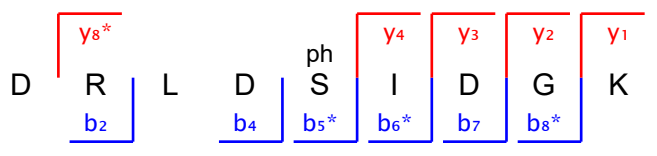

Raw file Scan Method Score m/z  
 sys\_02\_2 8976 FTMS; HCD 233.79 750.81

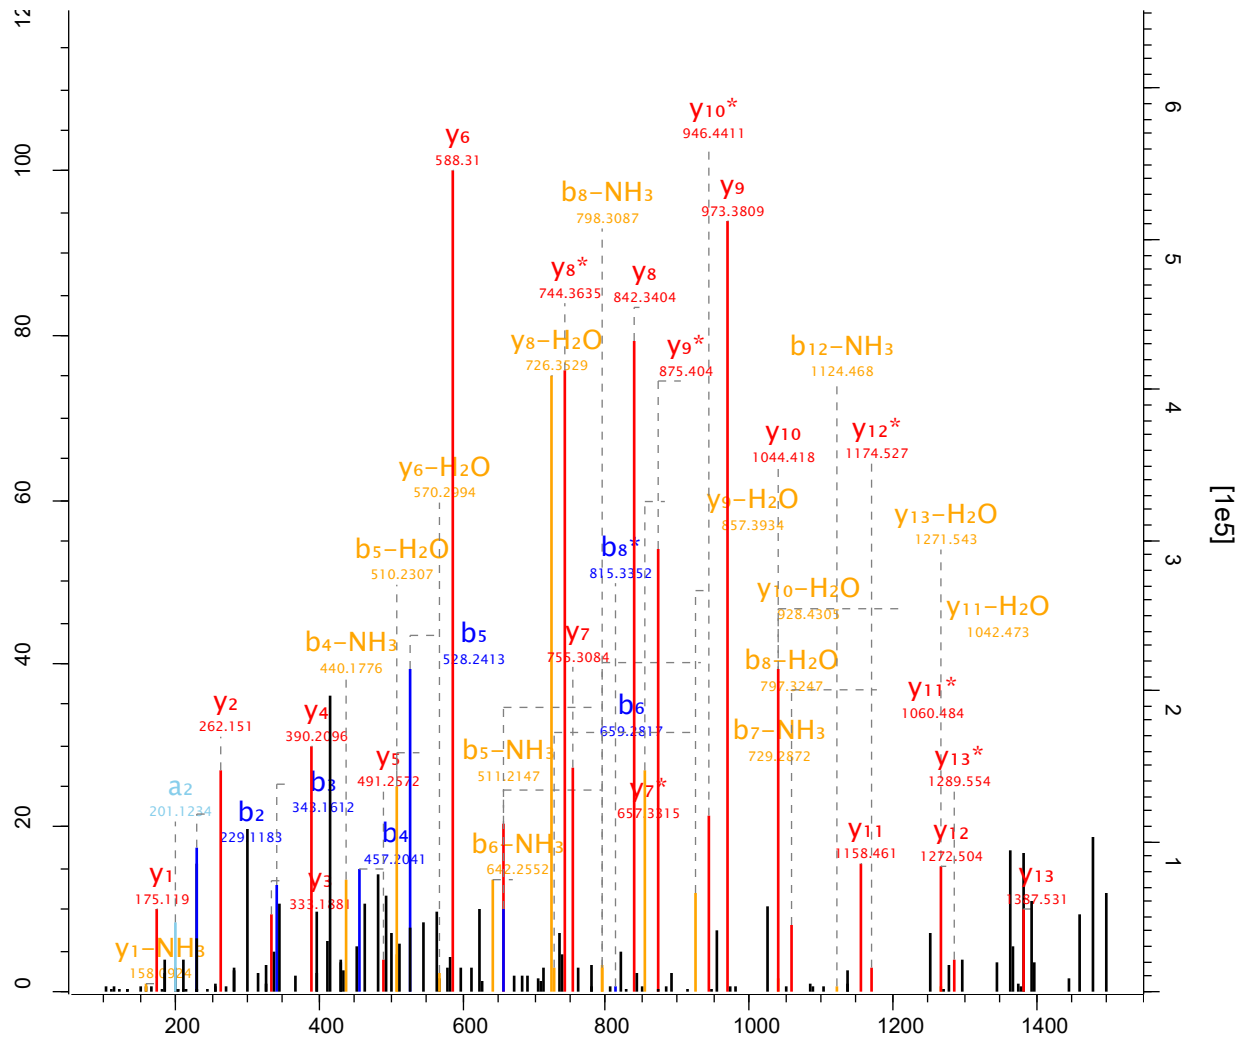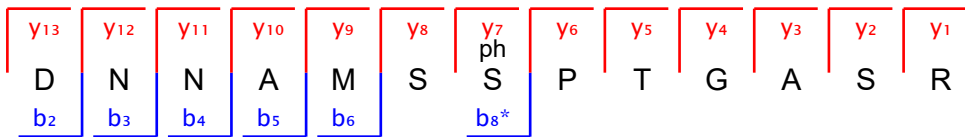



Raw file Scan Method Score m/z  
 sys\_02\_2 8995 FTMS; HCD 123.72 688.28

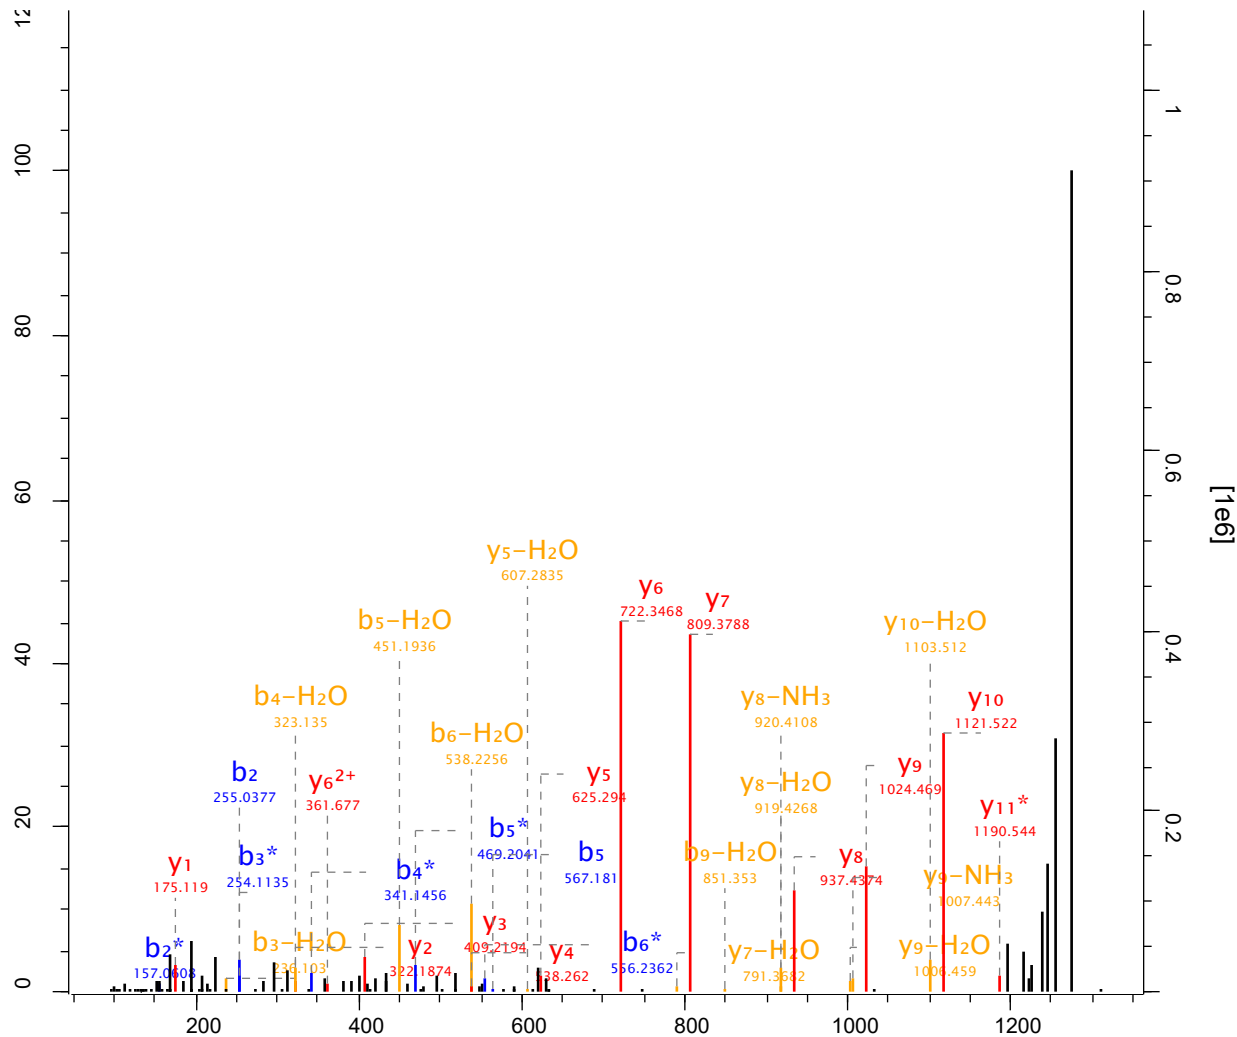

S y11\*  
ph y10 y9 y8 y7 y6 y5 y4 y3 y2 y1 -

S b2 b3\* b4\* b5 b6\* P S E S F R -

Raw file Scan Method Score m/z  
 sys\_02\_2 9067 FTMS; HCD 47.19 493.72

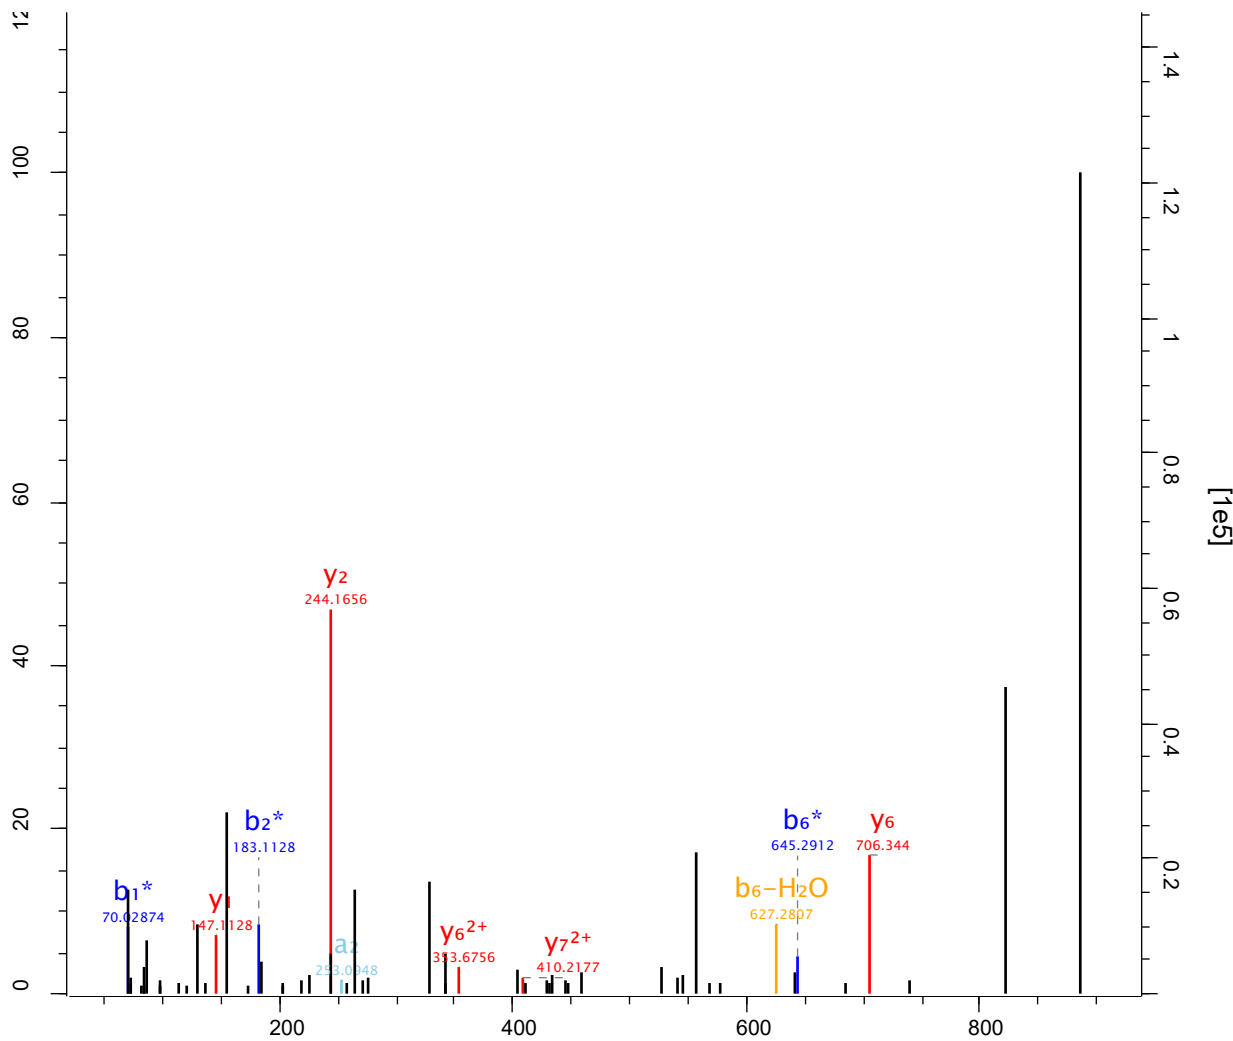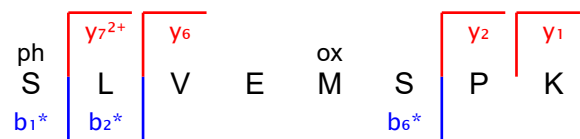

| Raw file | Scan | Method    | Score | m/z    |
|----------|------|-----------|-------|--------|
| sys_02_2 | 9085 | FTMS; HCD | 49.59 | 731.77 |

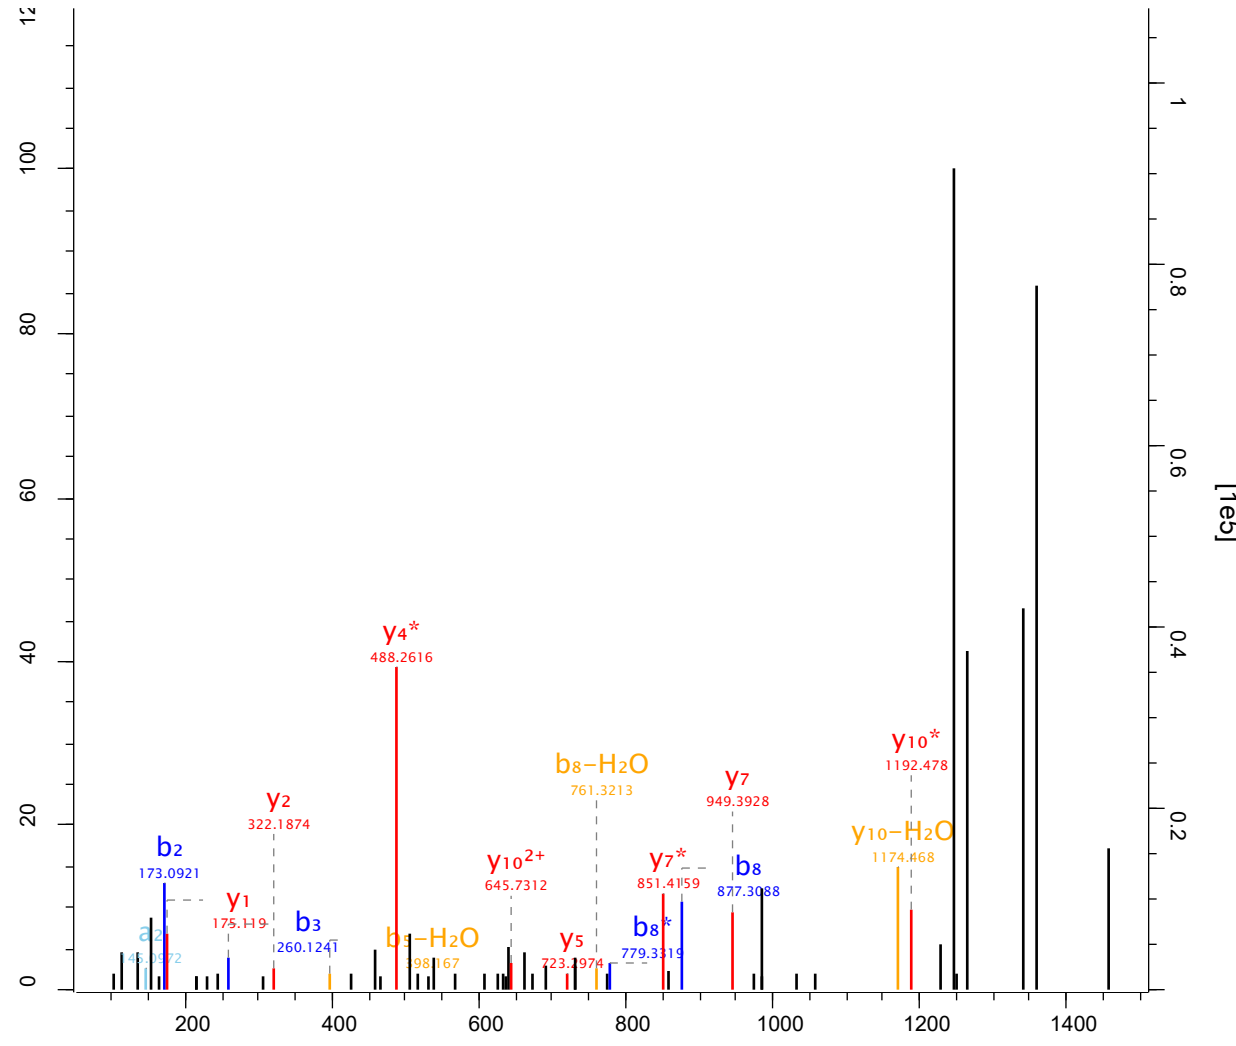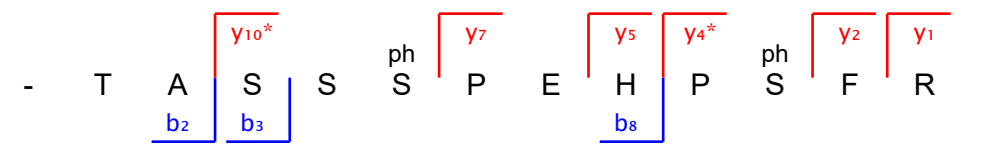

Raw file Scan Method Score m/z  
 sys\_02\_2 9317 FTMS; HCD 51.73 415.54

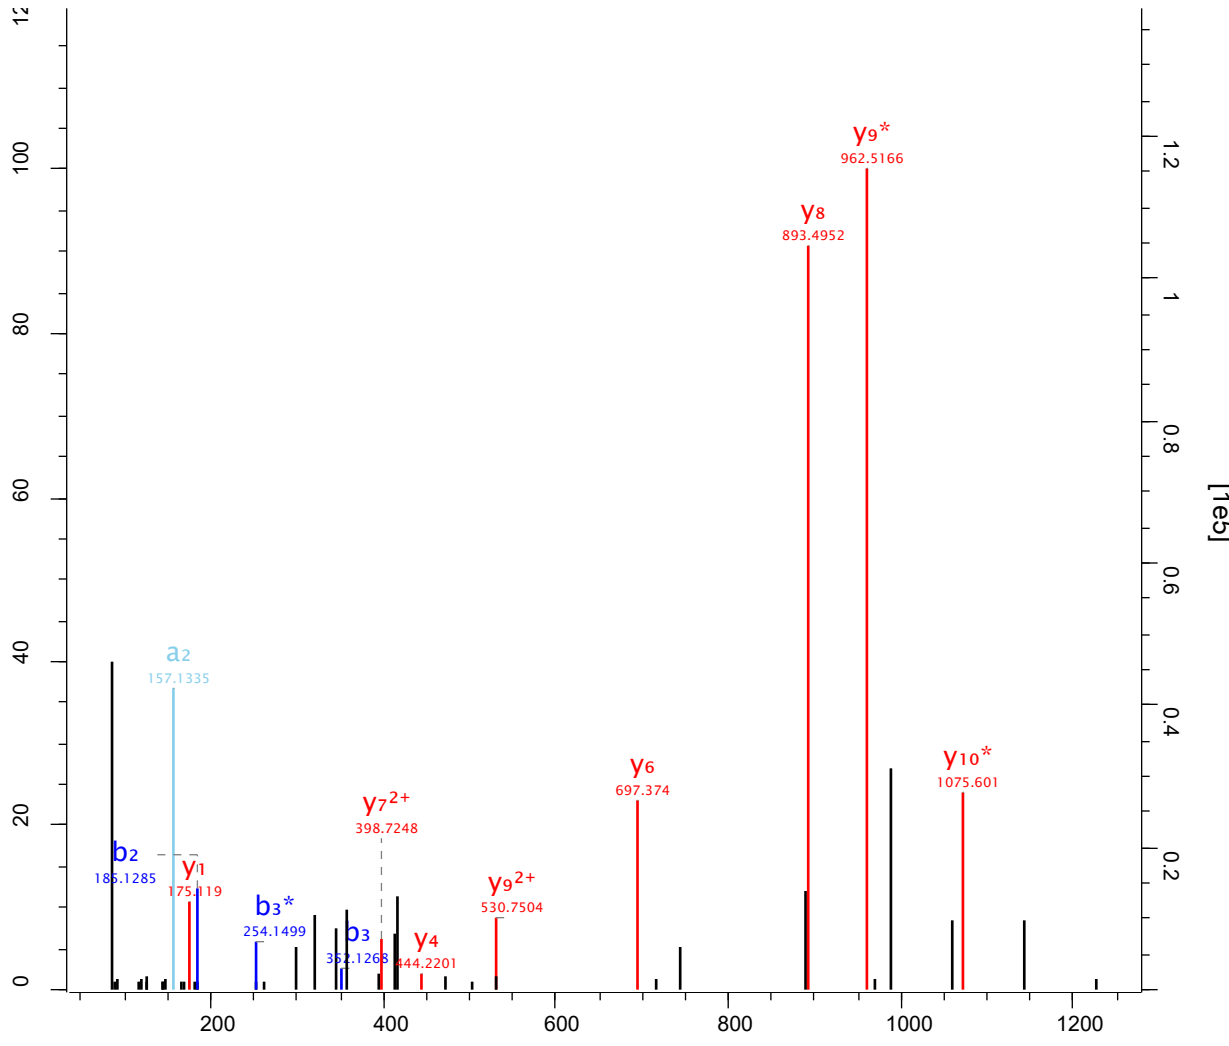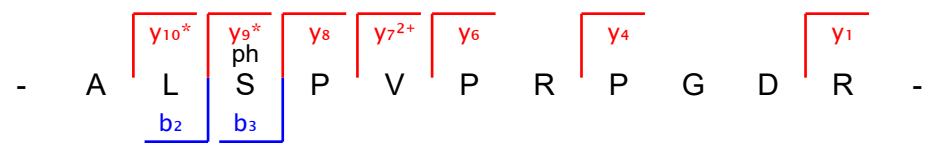

Raw file Scan Method Score m/z  
 sys\_02\_2 9349 FTMS; HCD 62.09 655.29

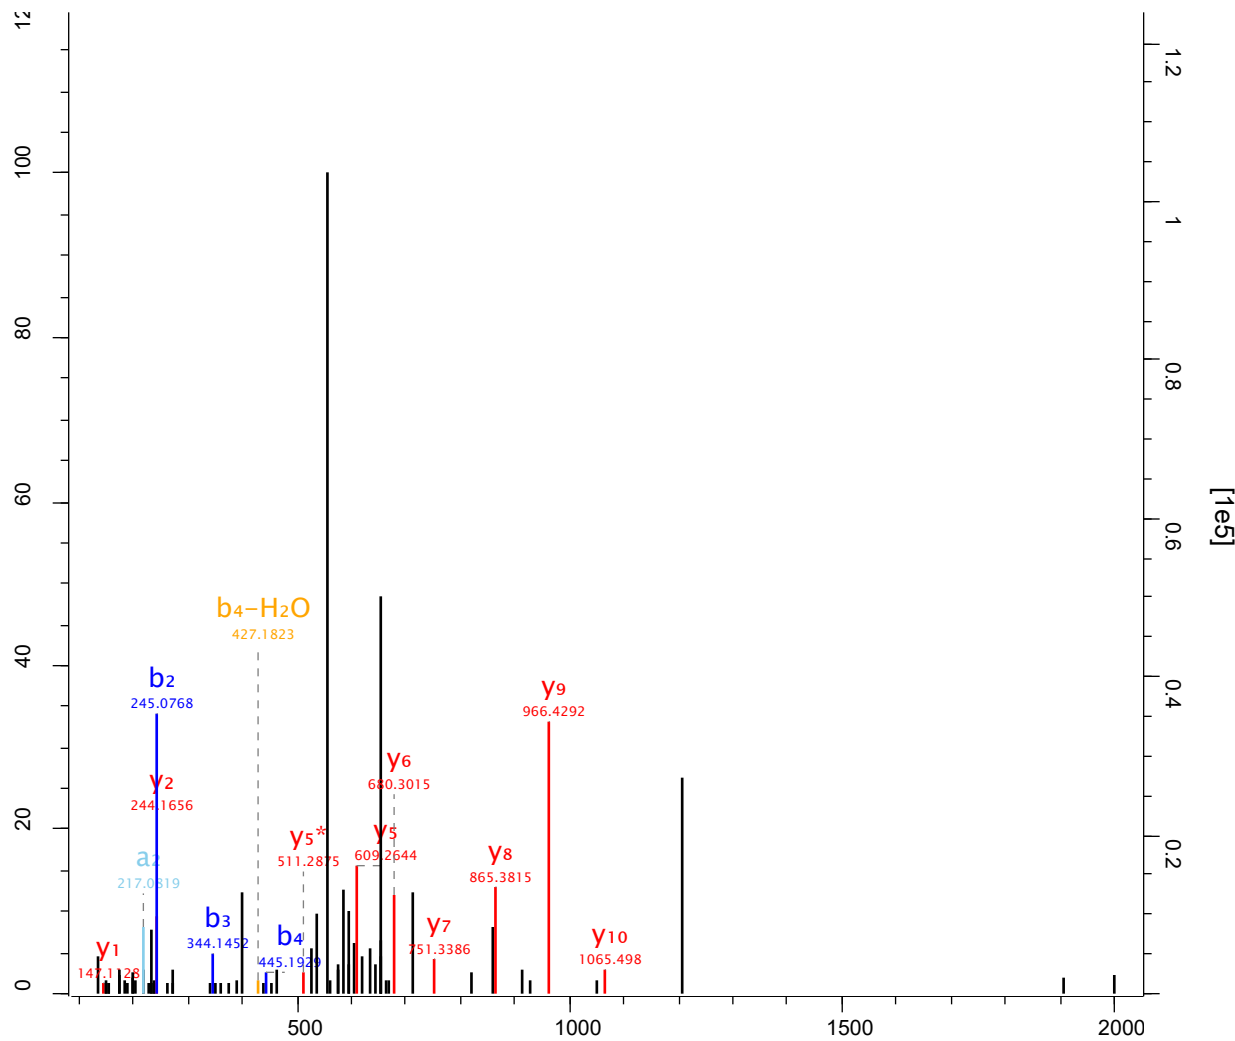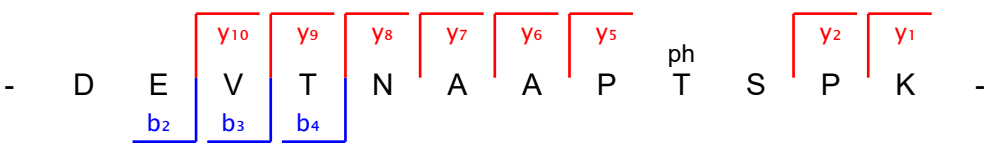

Raw file Scan Method Score m/z  
 sys\_02\_2 9406 FTMS; HCD 197.36 570.75

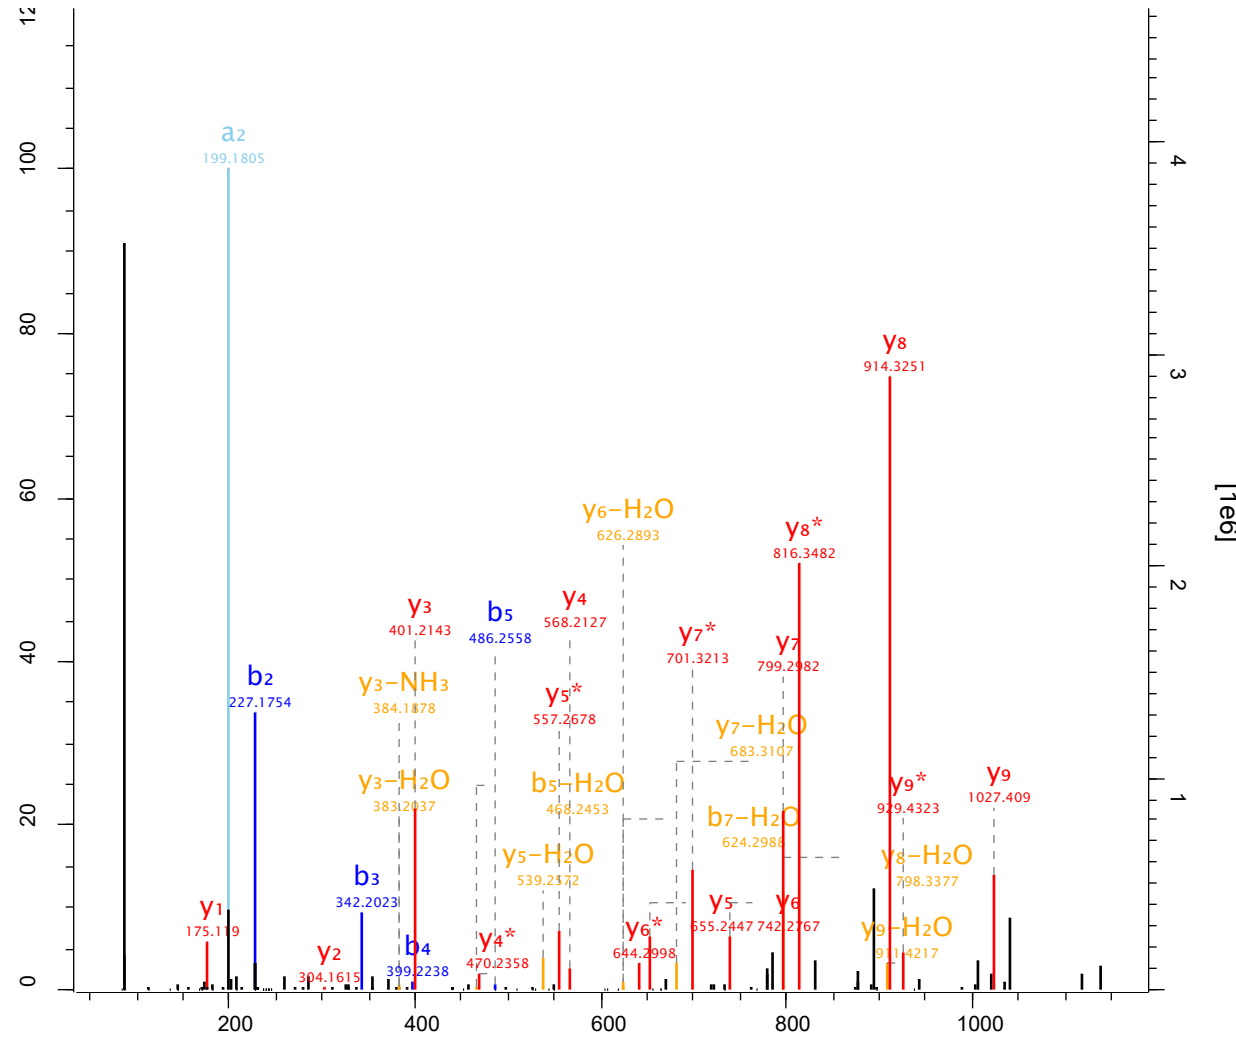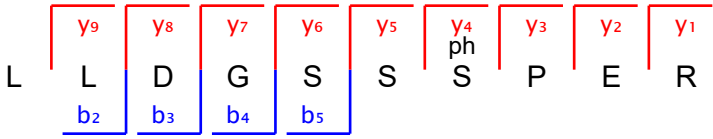

Raw file Scan Method Score m/z  
 sys\_02\_2 9492 FTMS; HCD 41.54 615.26

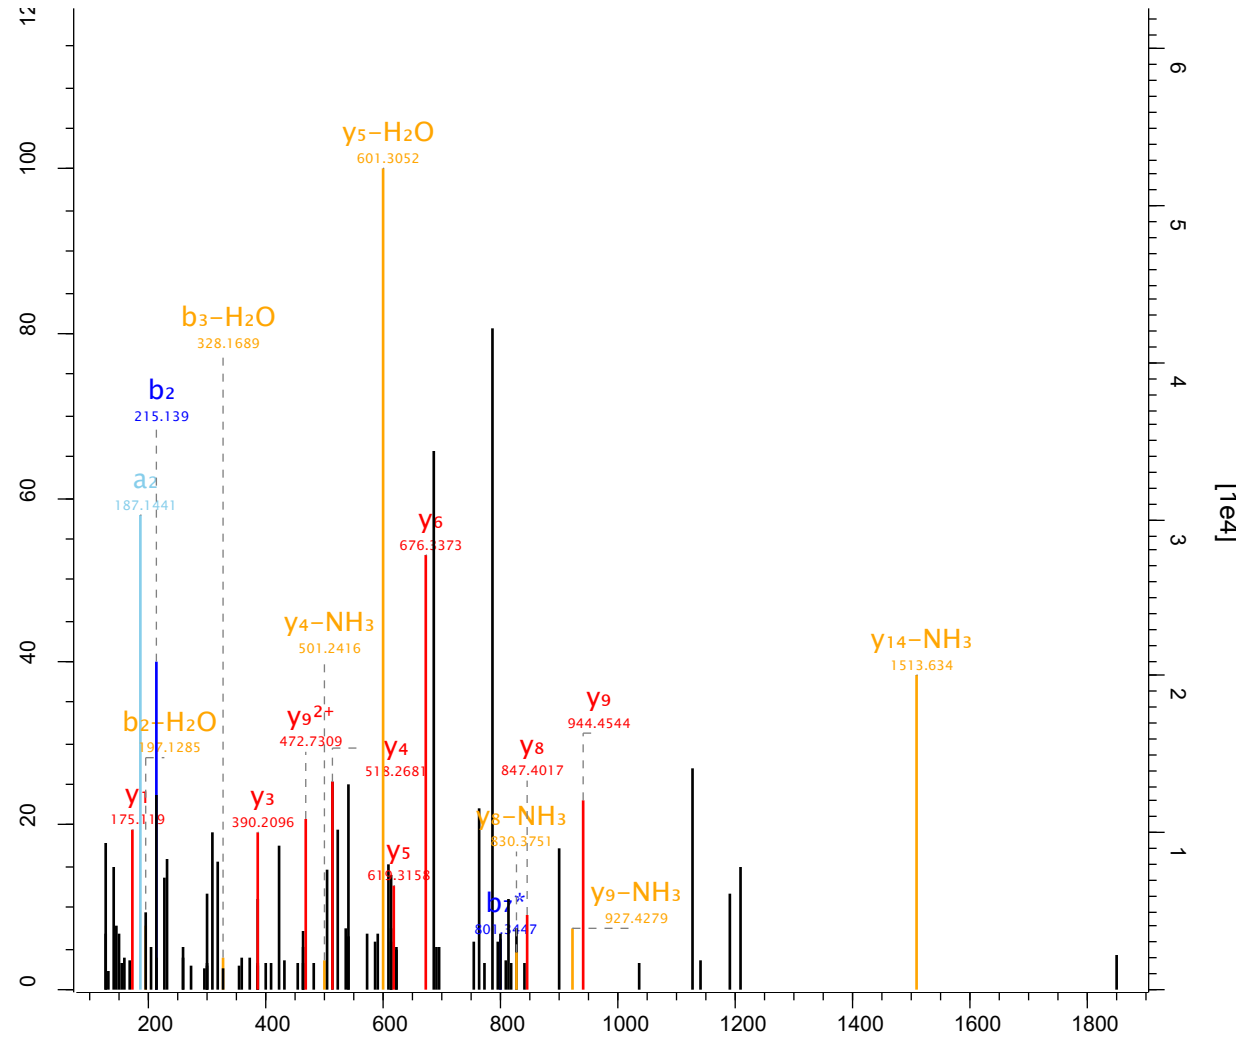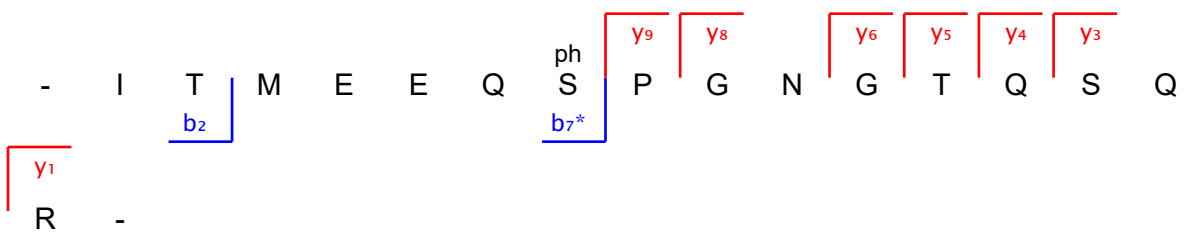

Raw file Scan Method Score m/z  
 sys\_02\_2 9554 FTMS; HCD 106.58 581.28

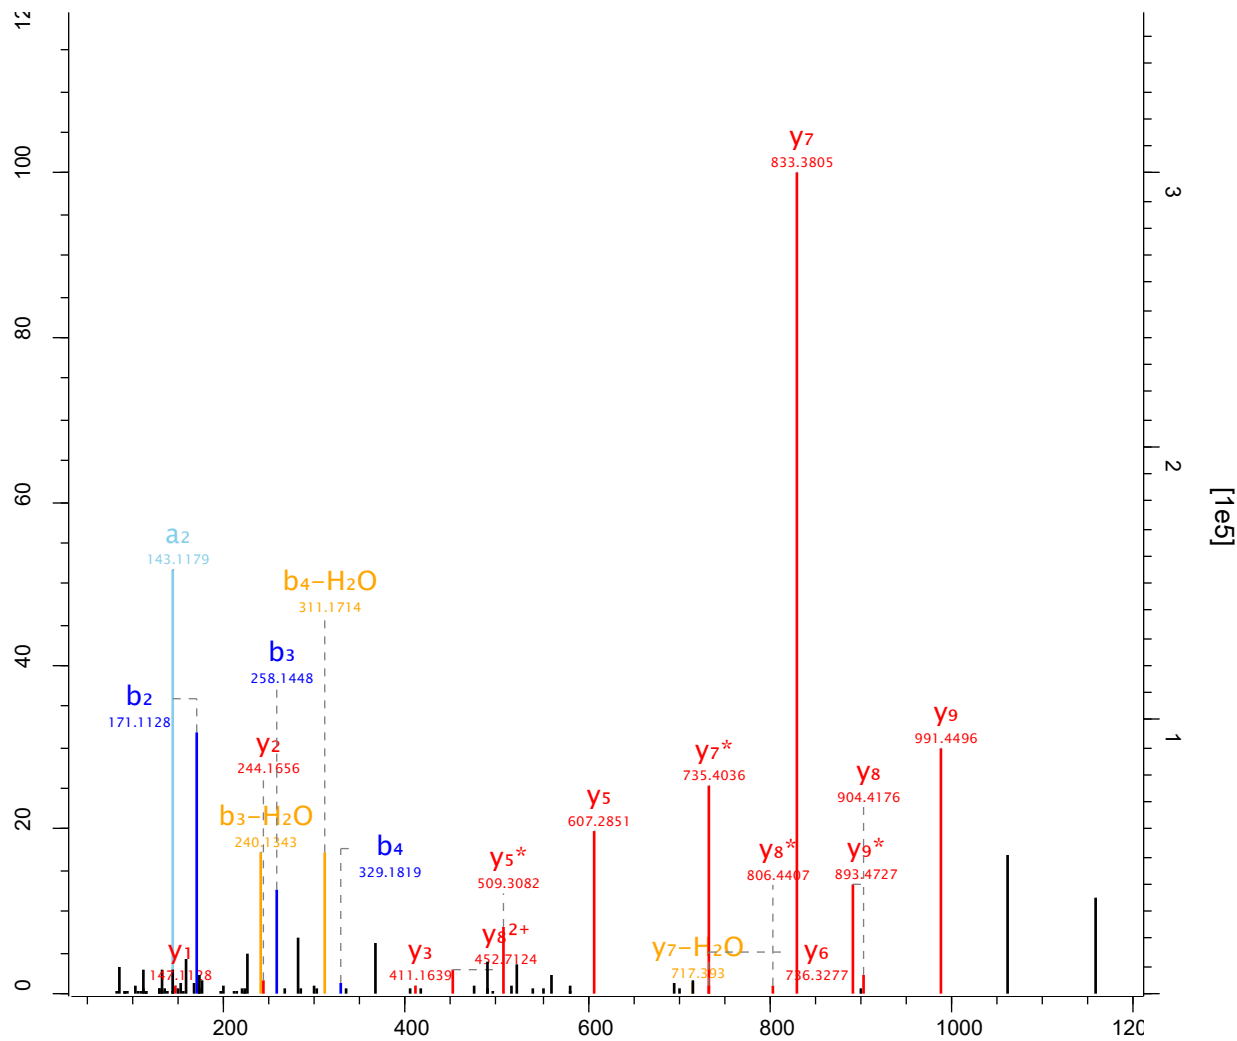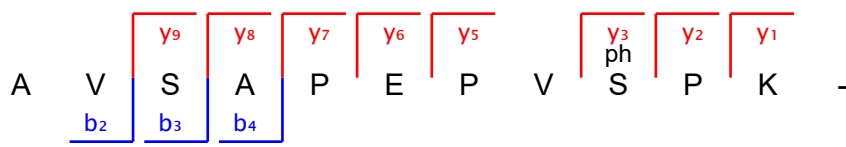





Raw file Scan Method Score m/z  
 sys\_02\_2 9679 FTMS; HCD 198.55 585.76

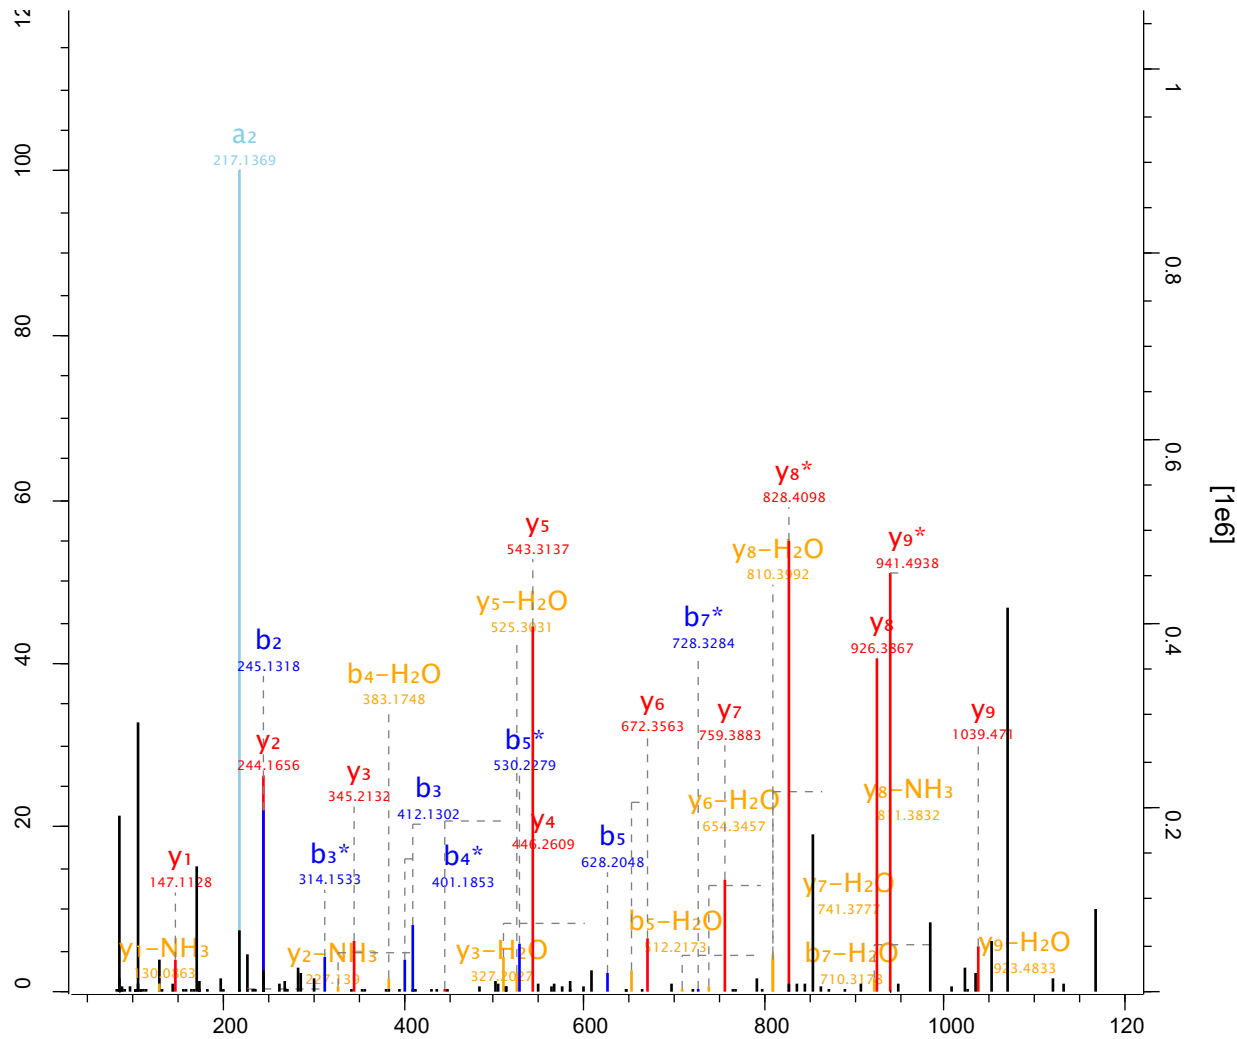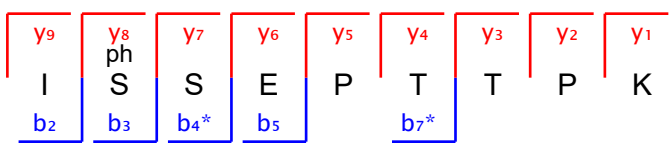

Raw file Scan Method Score m/z  
 sys\_02\_2 9812 FTMS; HCD 94.49 449.57

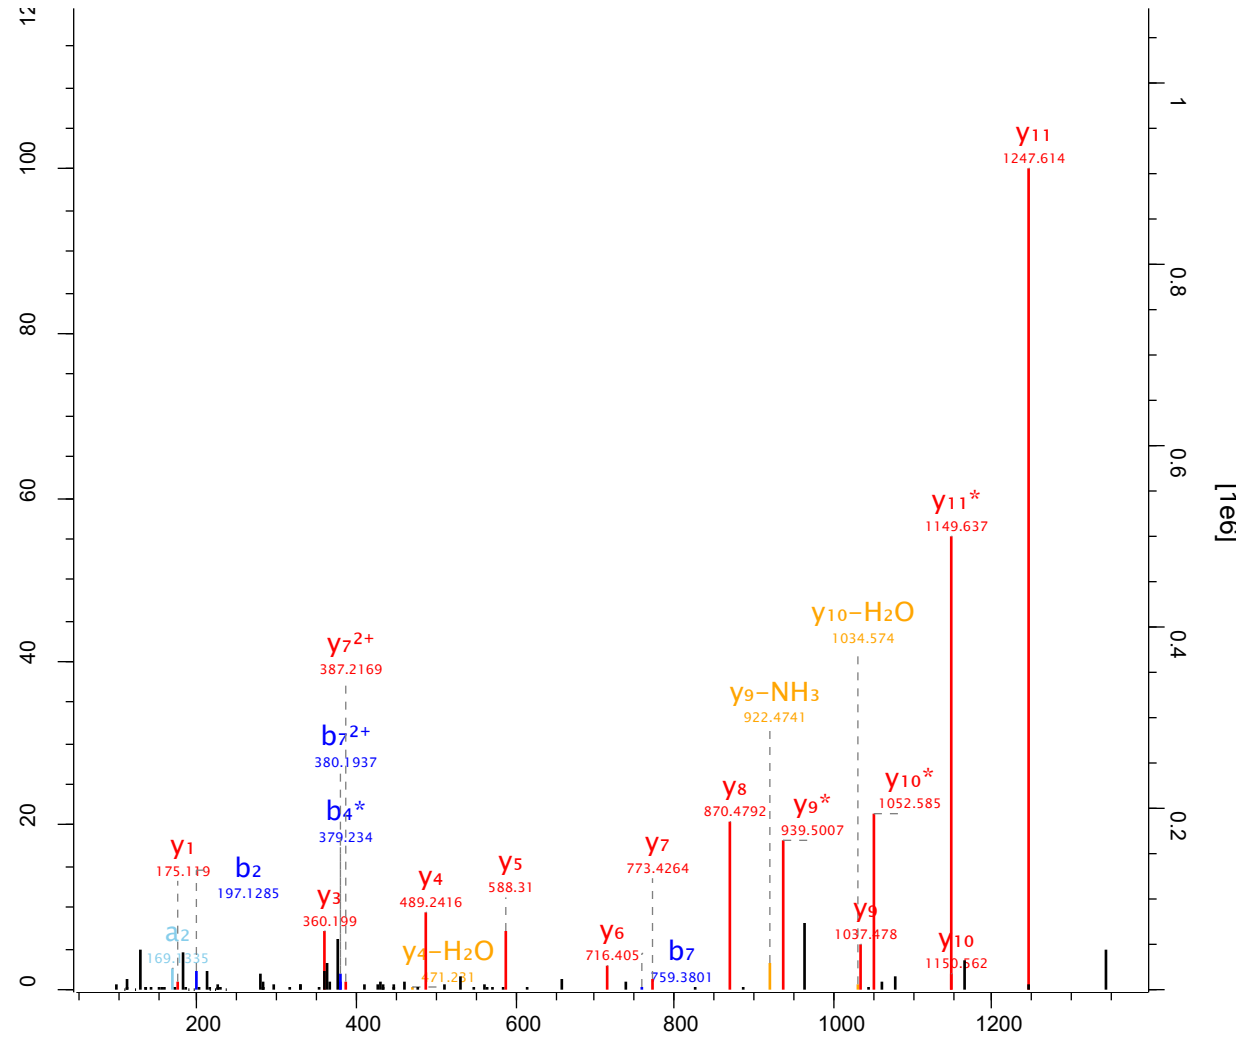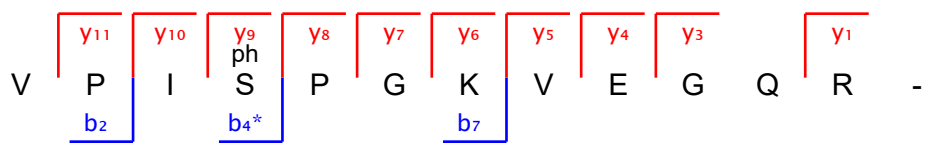

Raw file Scan Method Score m/z  
 sys\_02\_2 9882 FTMS; HCD 85.54 692.3

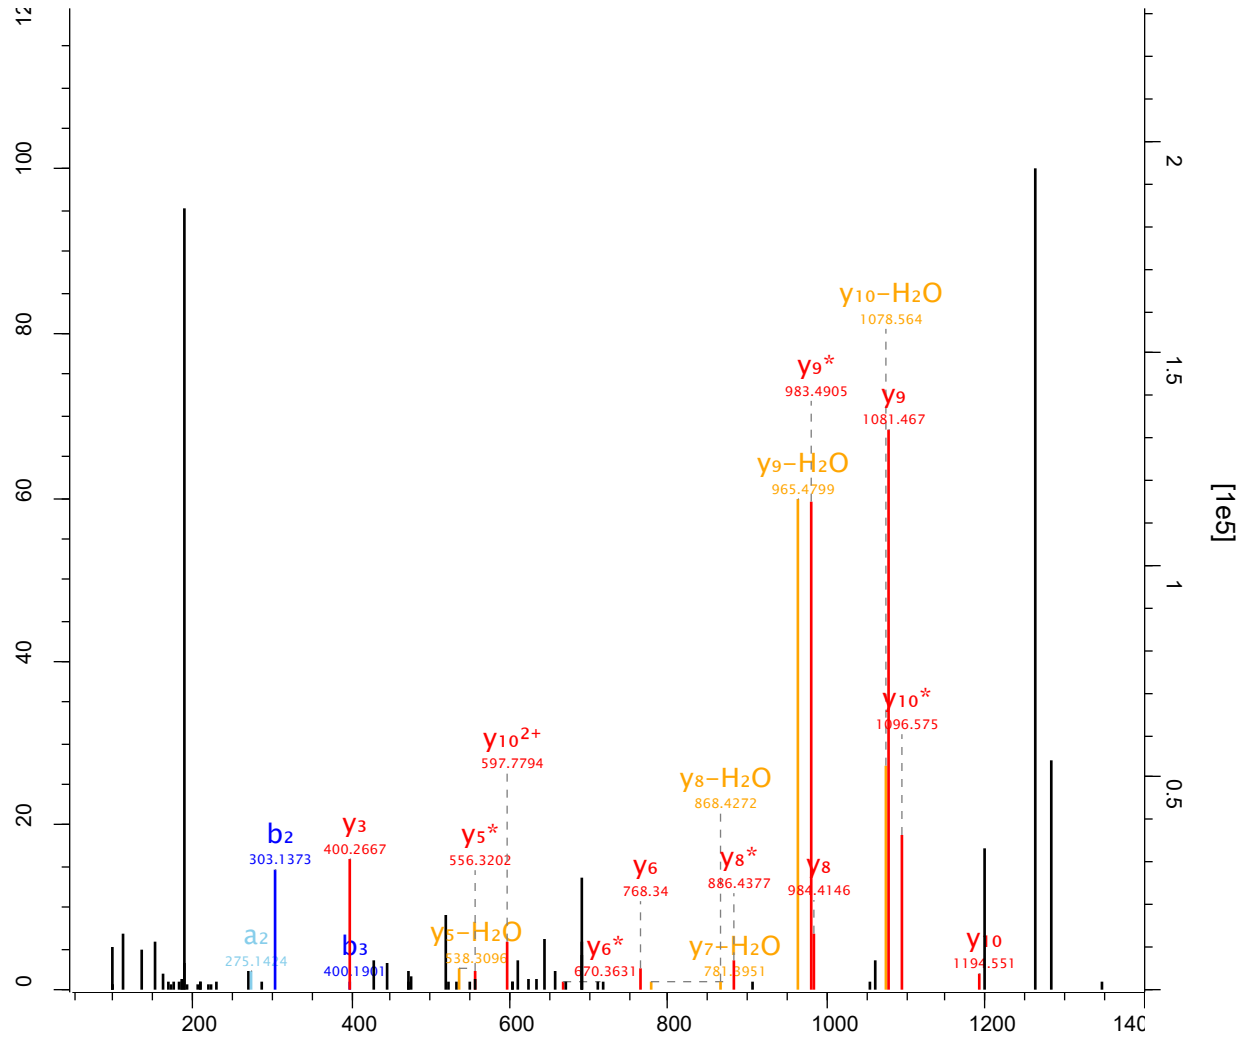

ac ox M L P S E N S P R K -  
 y10 y9 y8 y6 y5\* y3  
 b2 b3  
 ph

Raw file Scan Method Score m/z  
 sys\_02\_2 9892 FTMS; HCD 100.88 465.72

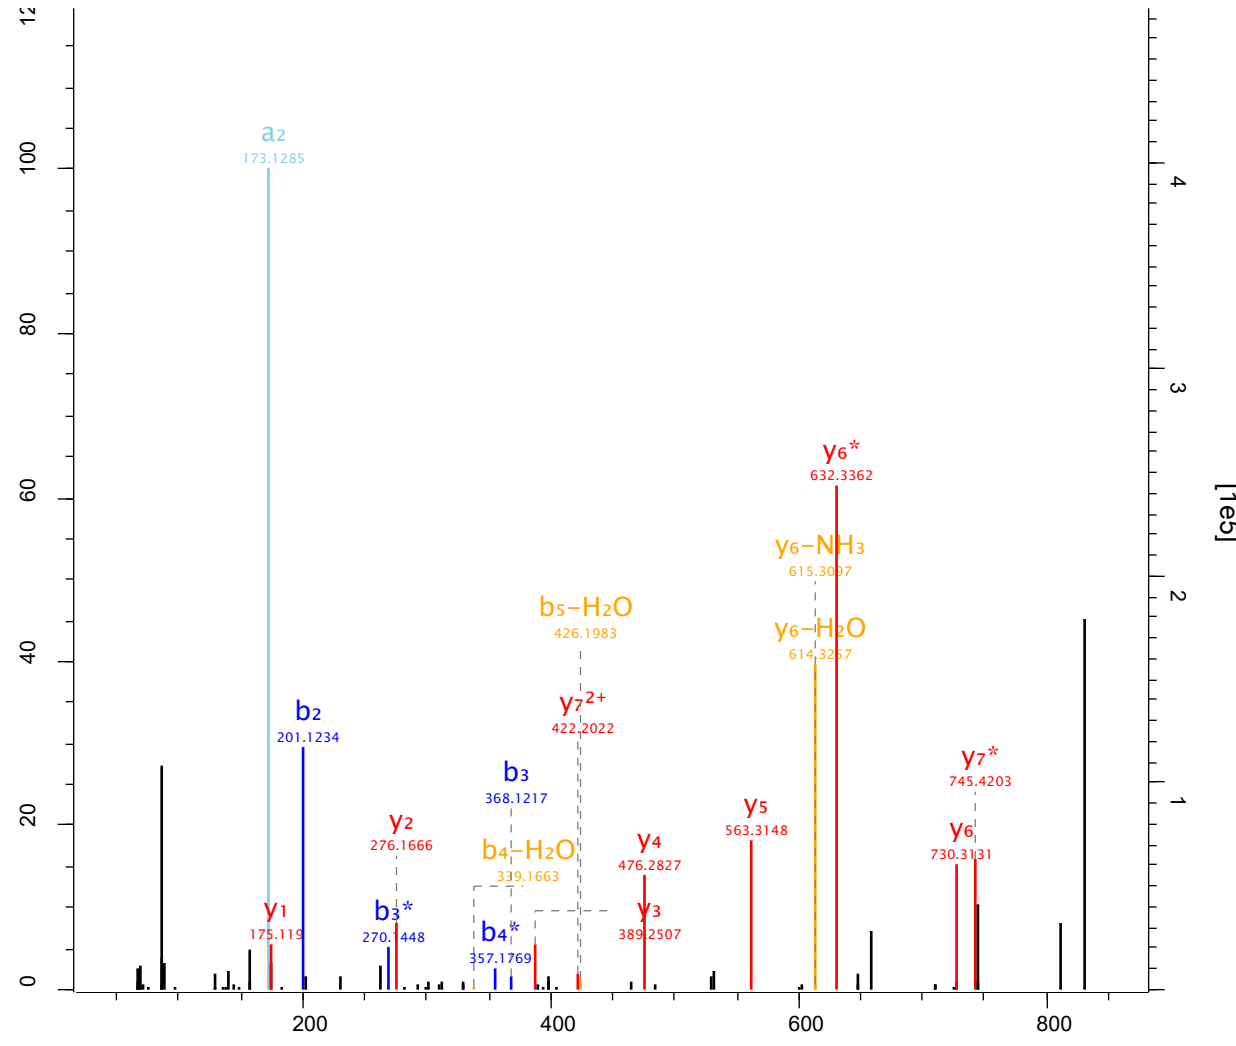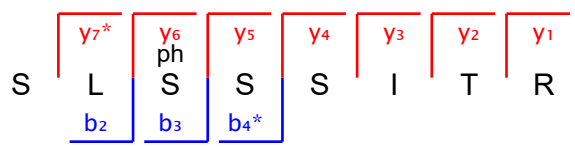

Raw file Scan Method Score m/z  
 sys\_02\_3 10958 FTMS; HCD 113.47 677.31

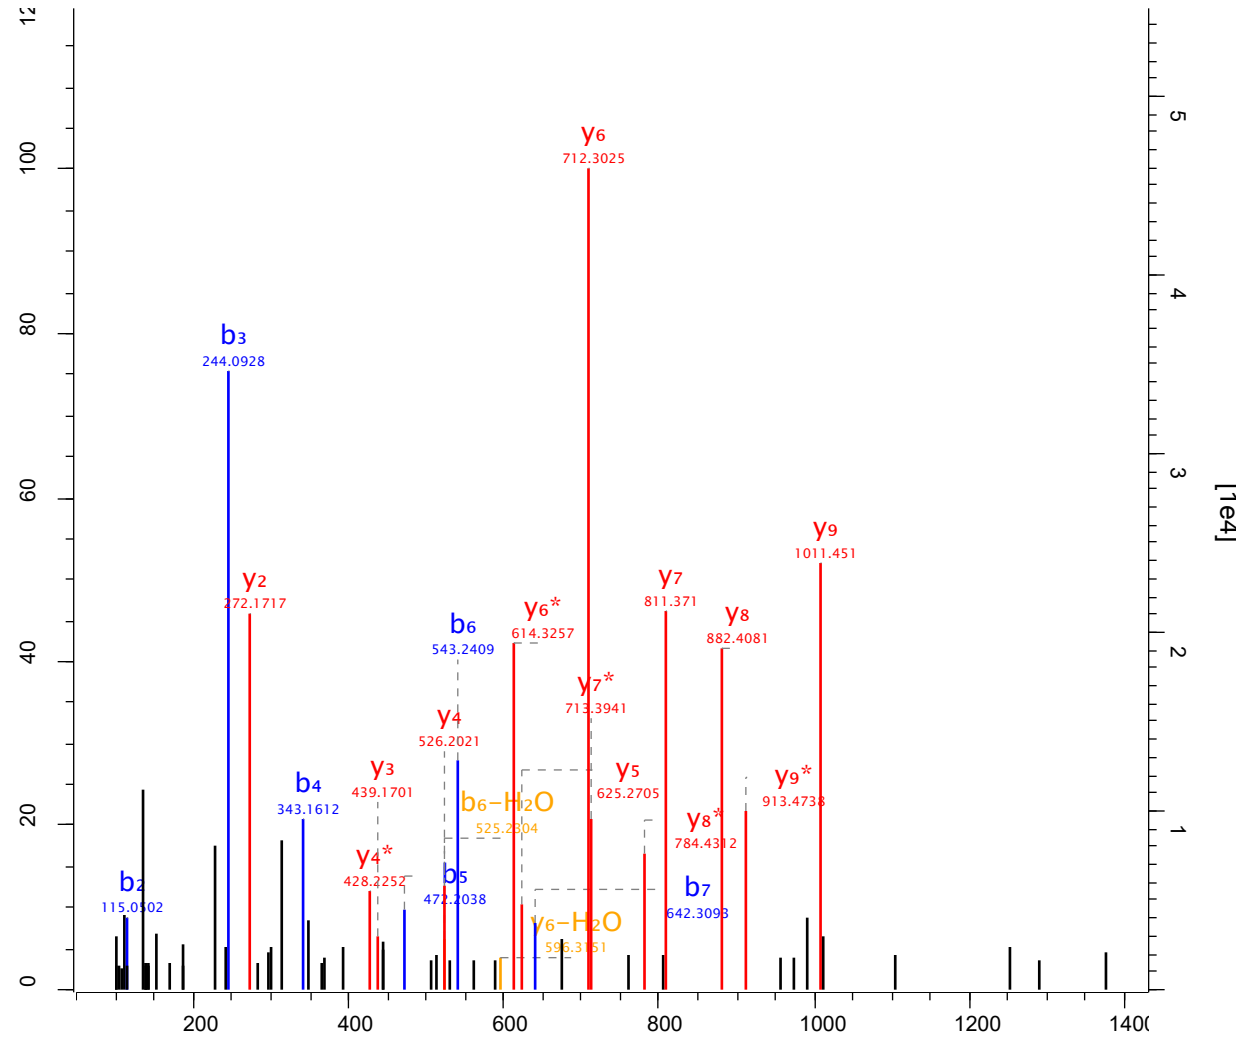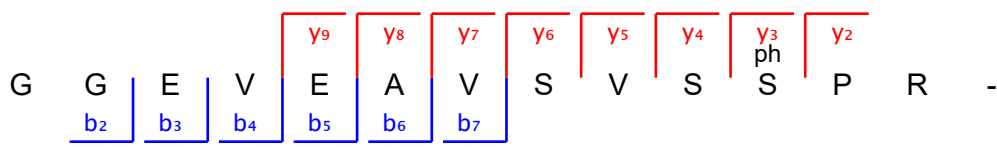

Raw file Scan Method Score m/z  
 sys\_02\_3 14871 FTMS; HCD 47.77 707.33

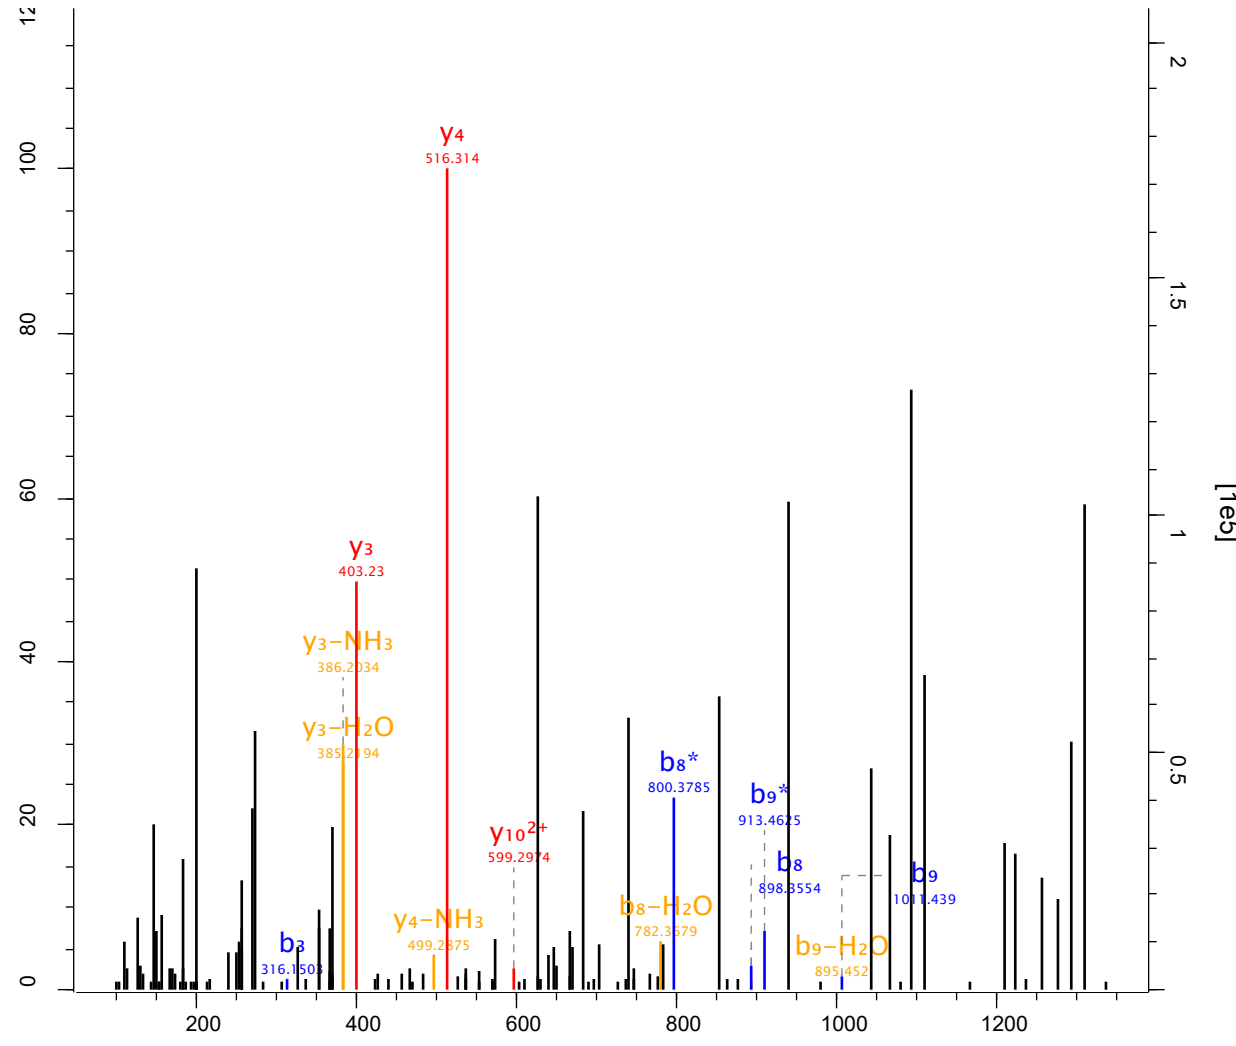

- T D V Q S L S S I L D R -  
 (Annotations: y10^2+ above V, b3 below V, y4 above I, b8 below S, b9 below I, y3 above L)

Raw file Scan Method Score m/z  
 sys\_02\_3 18780 FTMS; HCD 43.3 567.25

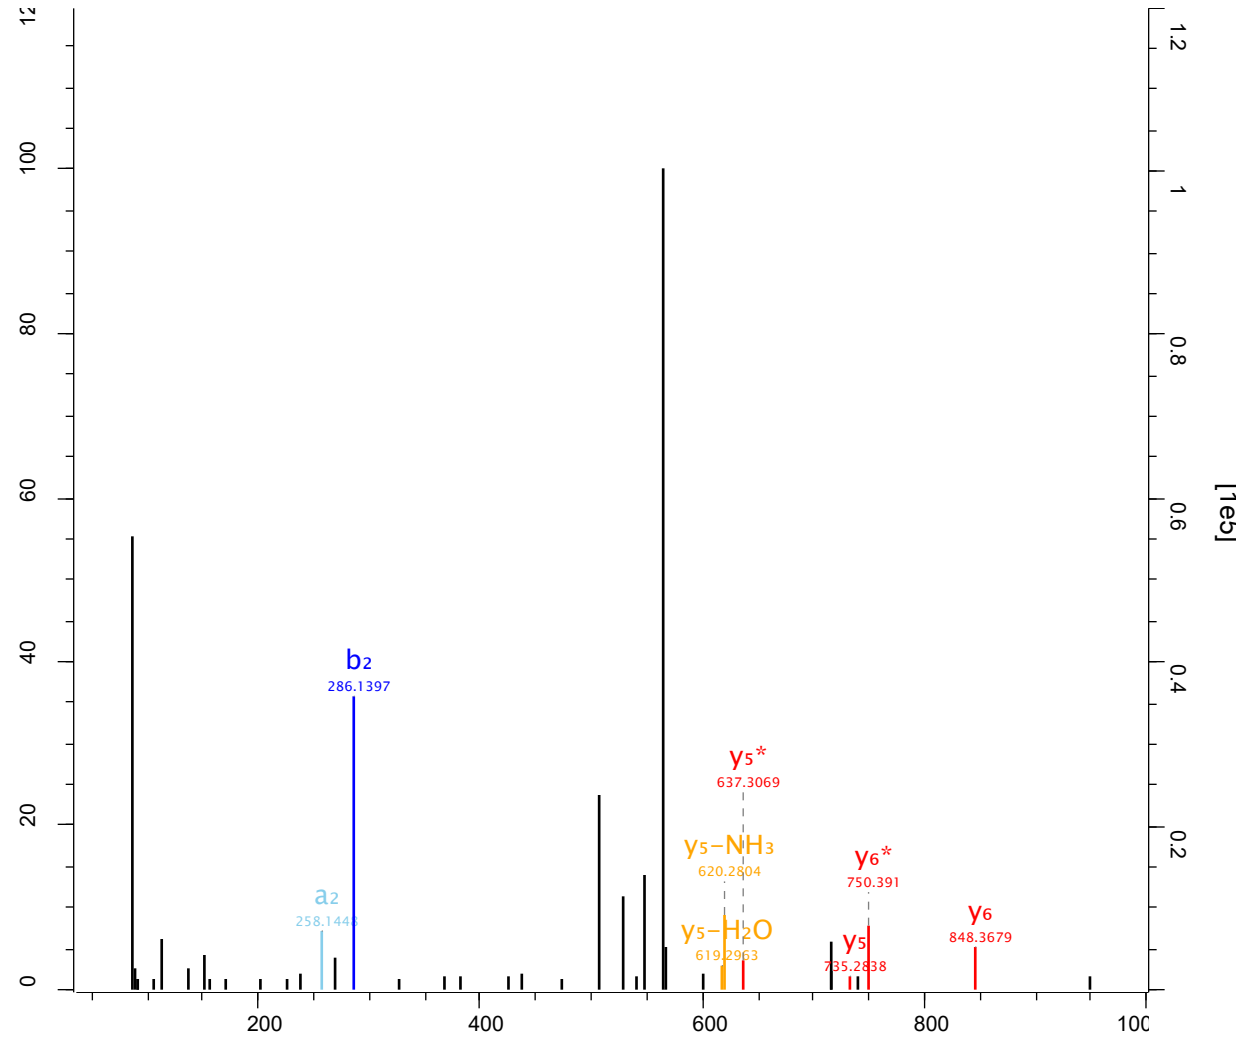

ac  
 - K D L L ph S L ph S R -  
 b<sub>2</sub> y<sub>6</sub> y<sub>5</sub>



Raw file Scan Method Score m/z  
 sys\_02\_3 19509 FTMS; HCD 45.43 548.24

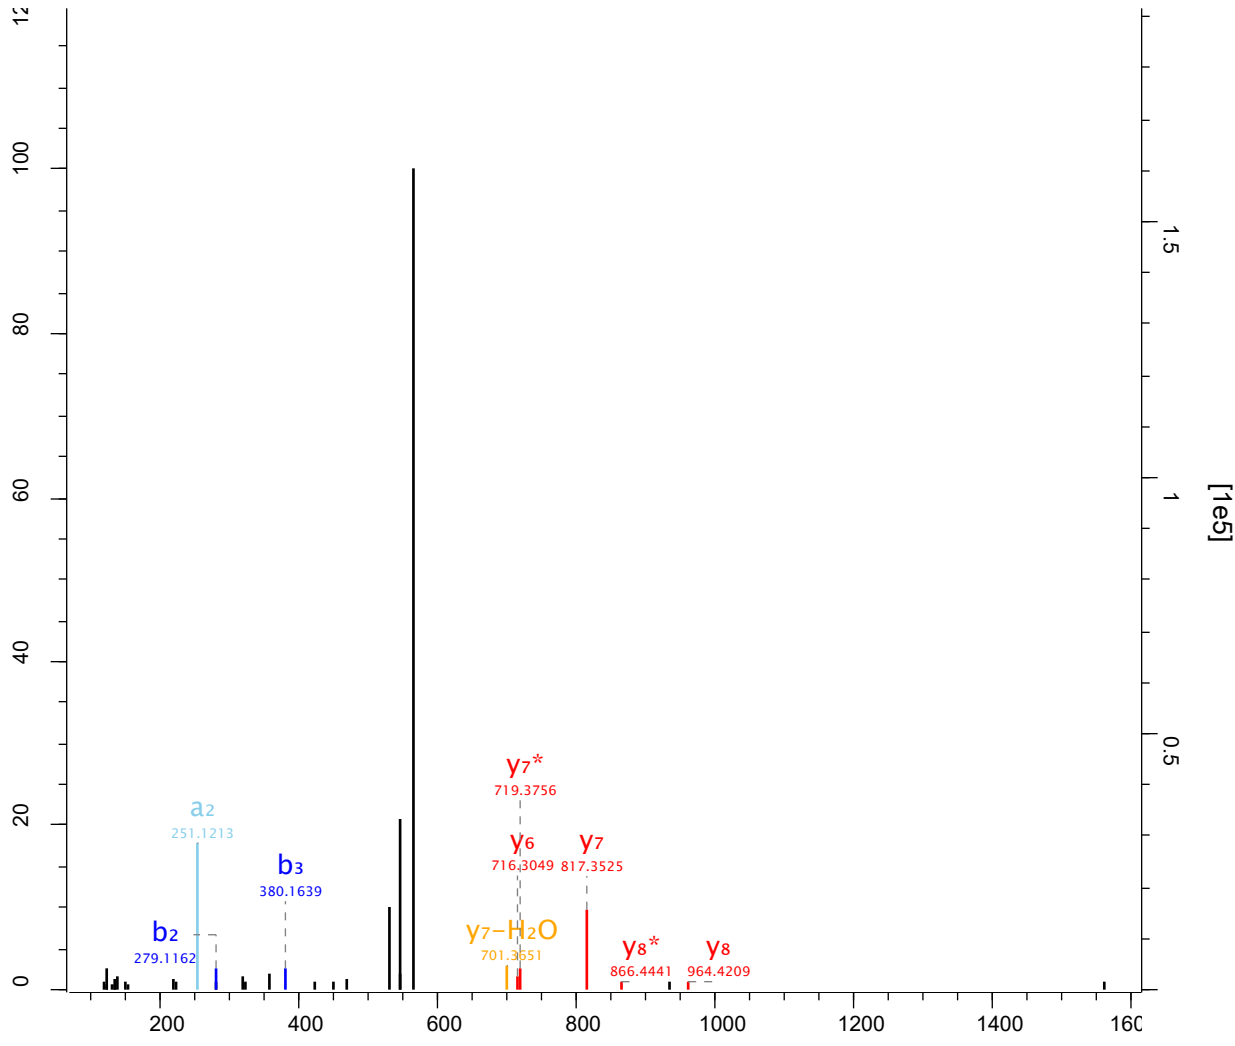

- M F T M A ph S S L K -  
b<sub>2</sub> b<sub>3</sub>

| Raw file | Scan | Method    | Score | m/z    |
|----------|------|-----------|-------|--------|
| sys_02_3 | 2240 | FTMS; HCD | 42.98 | 537.19 |

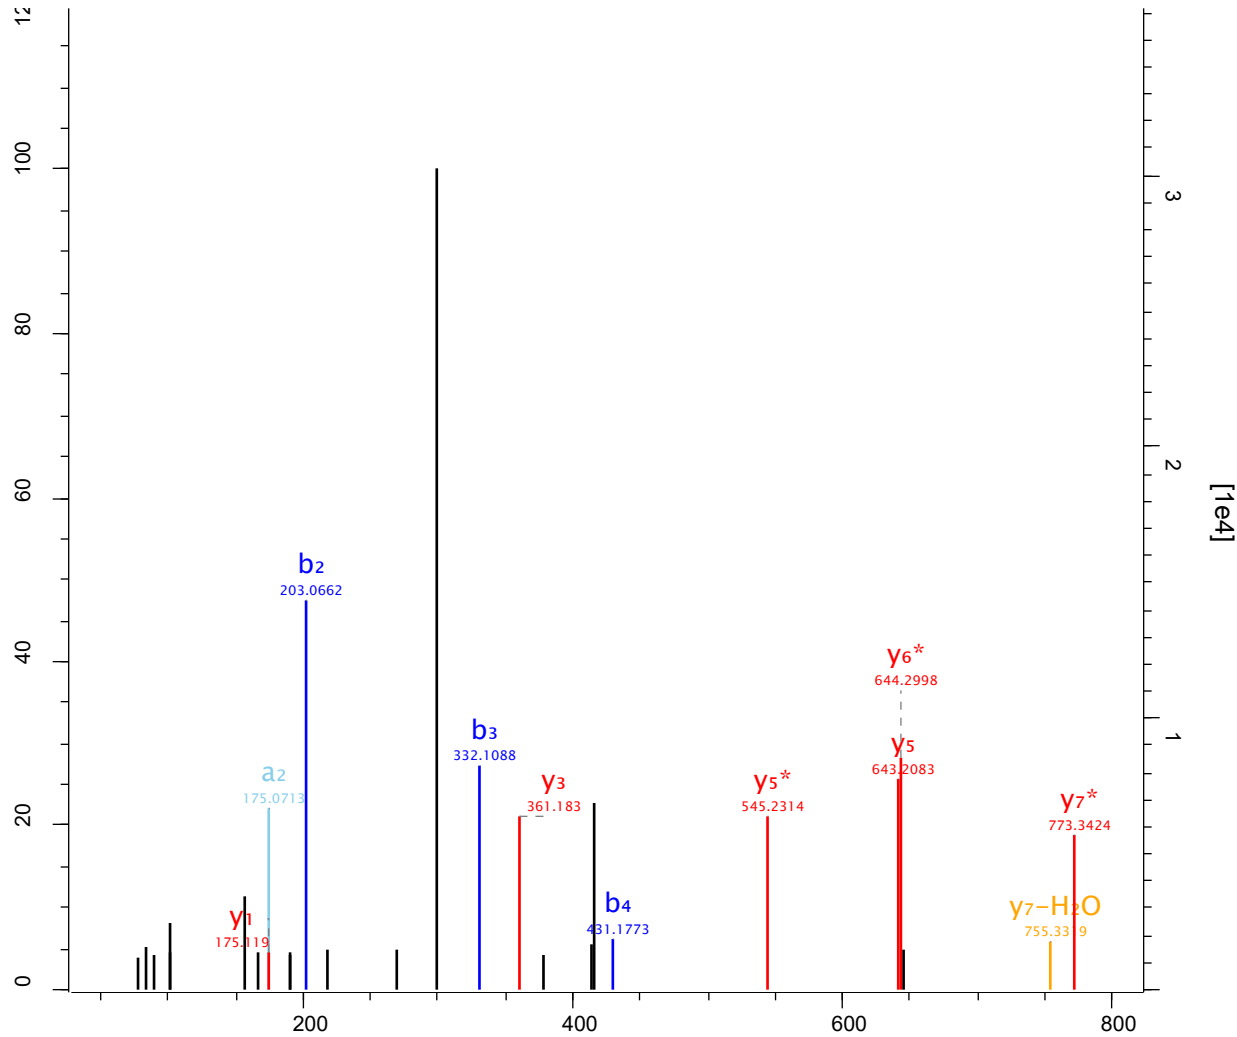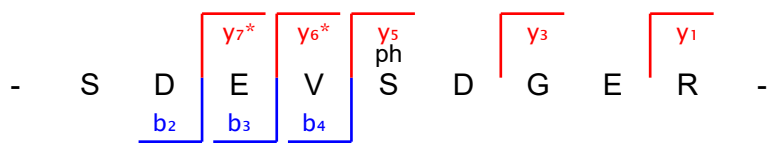

Raw file Scan Method Score m/z  
 sys\_02\_3 23116 FTMS; HCD 154.1 570.29

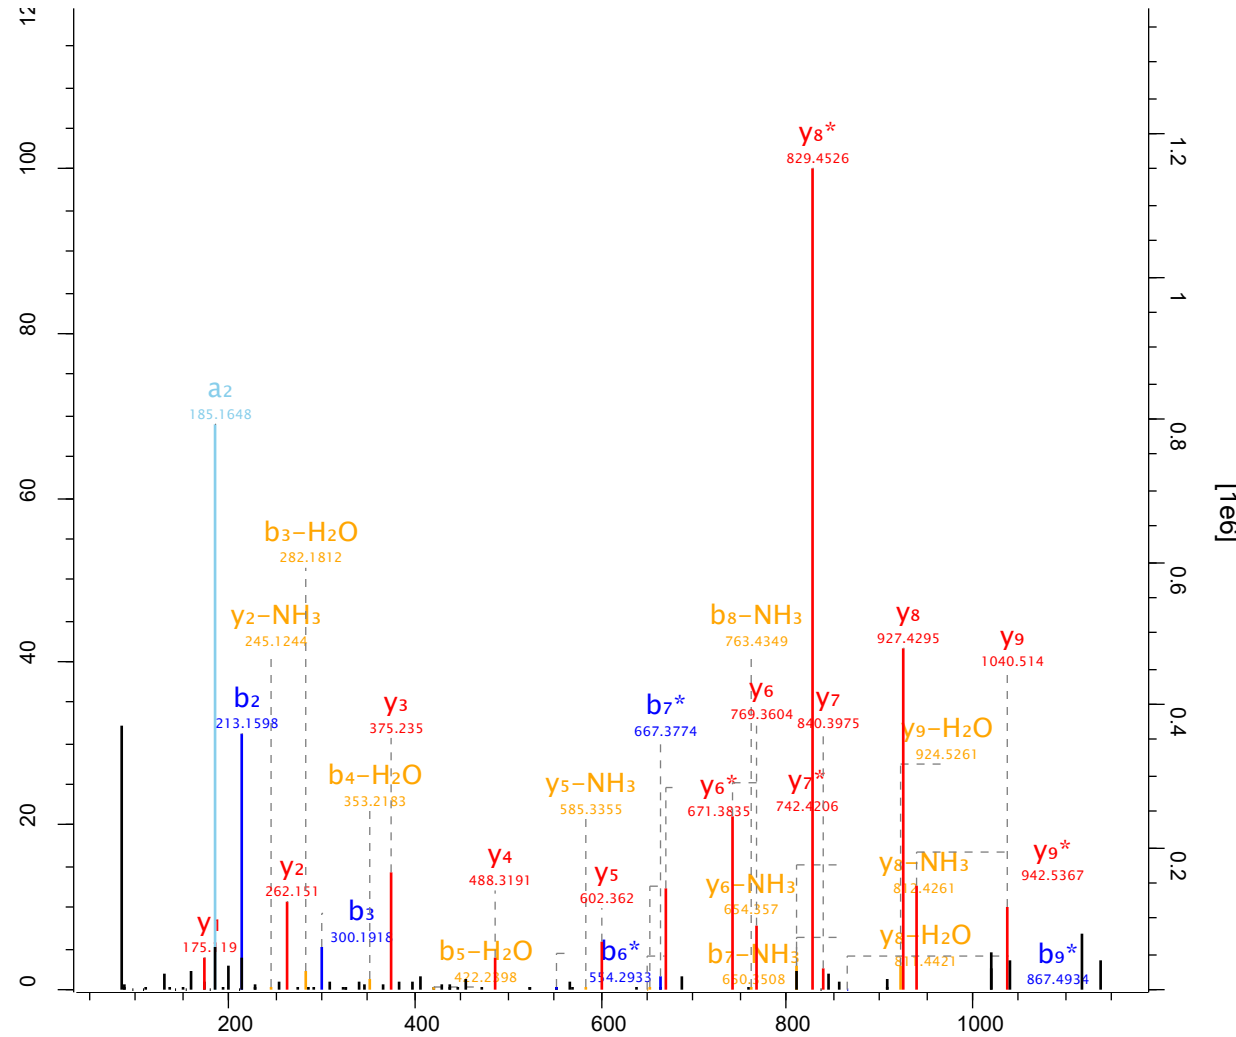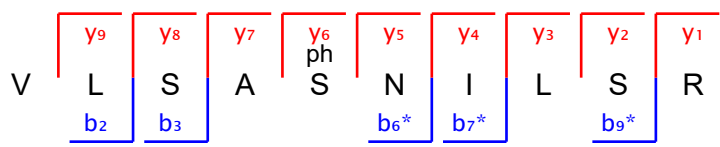

Raw file Scan Method Score m/z  
 sys\_02\_3 23130 FTMS; HCD 41.26 918.42

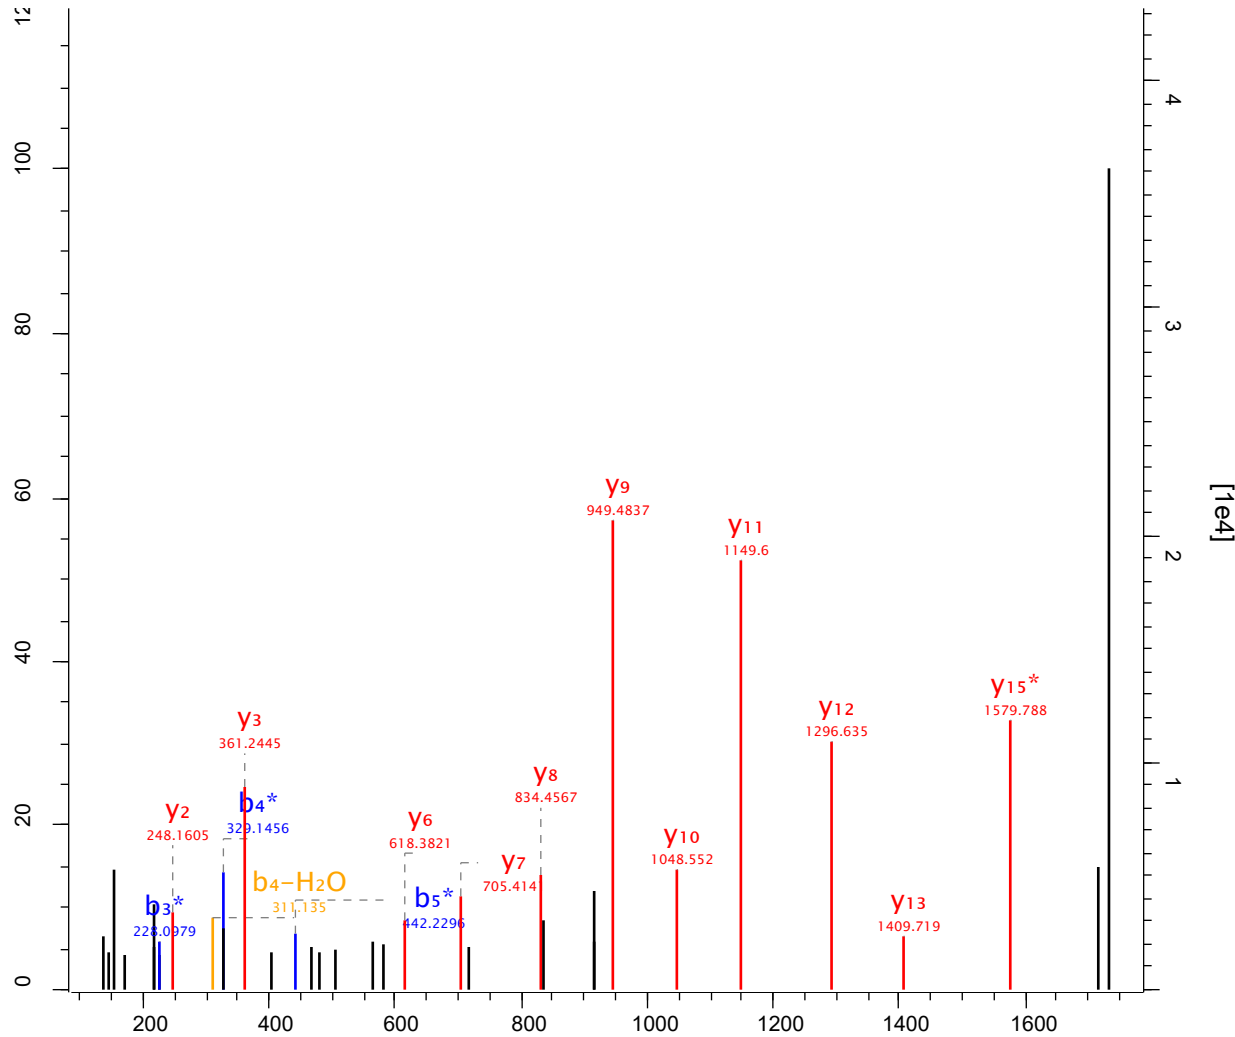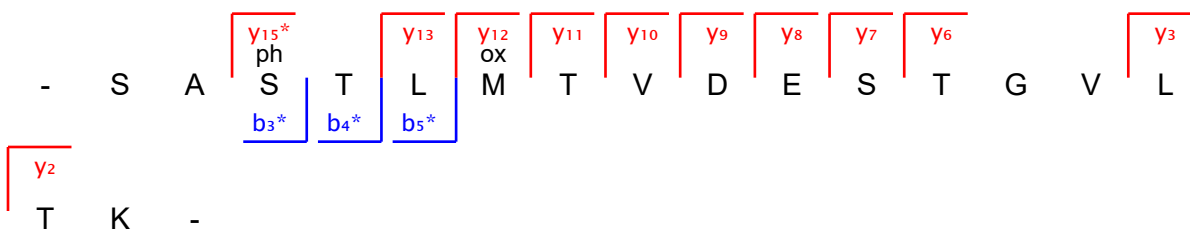

| Raw file | Scan | Method    | Score | m/z    |
|----------|------|-----------|-------|--------|
| sys_02_3 | 2762 | FTMS; HCD | 56.26 | 441.74 |

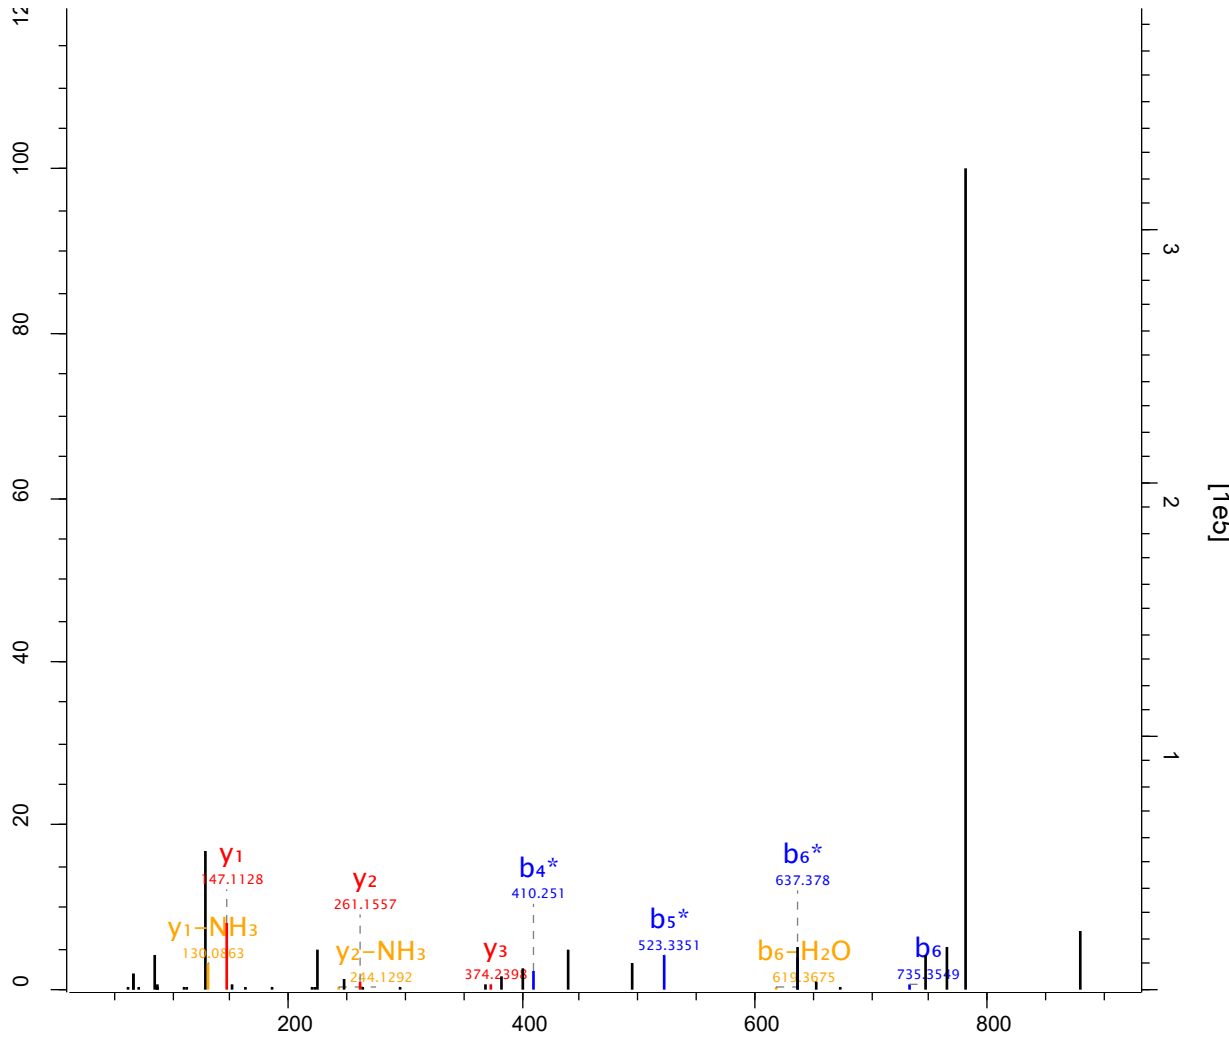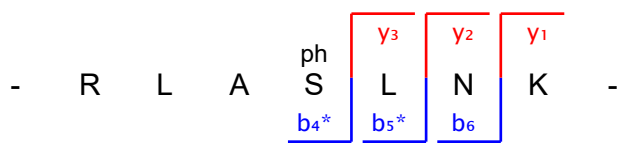

| Raw file | Scan | Method    | Score | m/z    |
|----------|------|-----------|-------|--------|
| sys_02_3 | 3036 | FTMS; HCD | 48.57 | 556.89 |

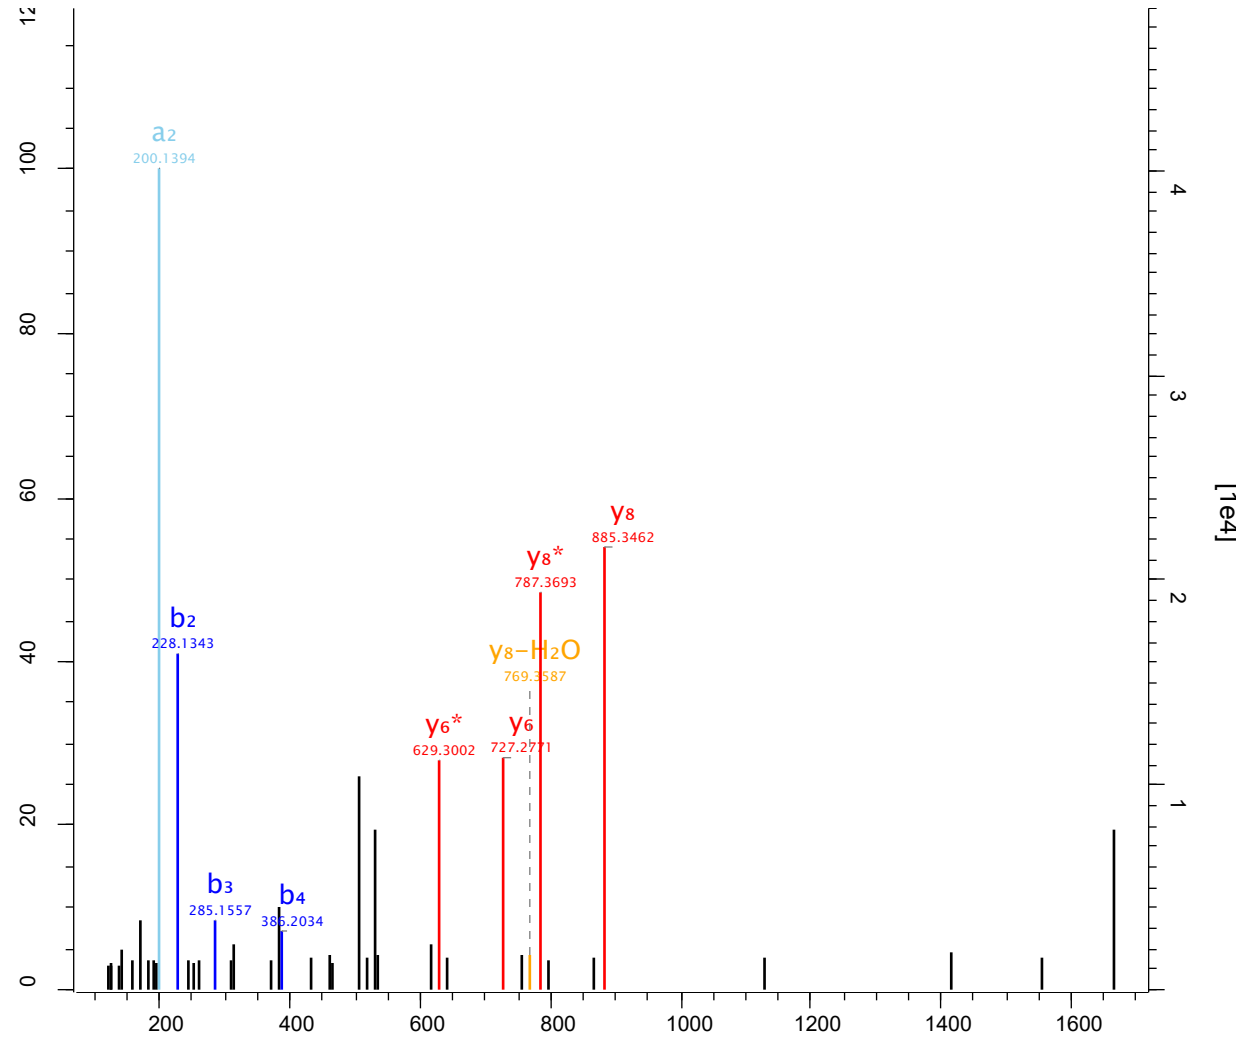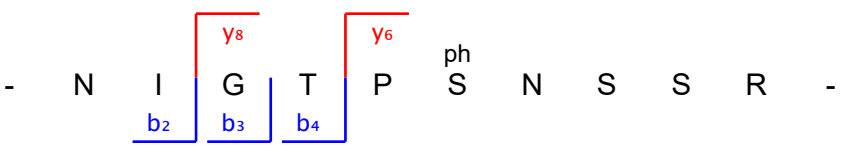

Raw file Scan Method Score m/z  
 sys\_02\_3 36058 FTMS; HCD 75.91 746.31

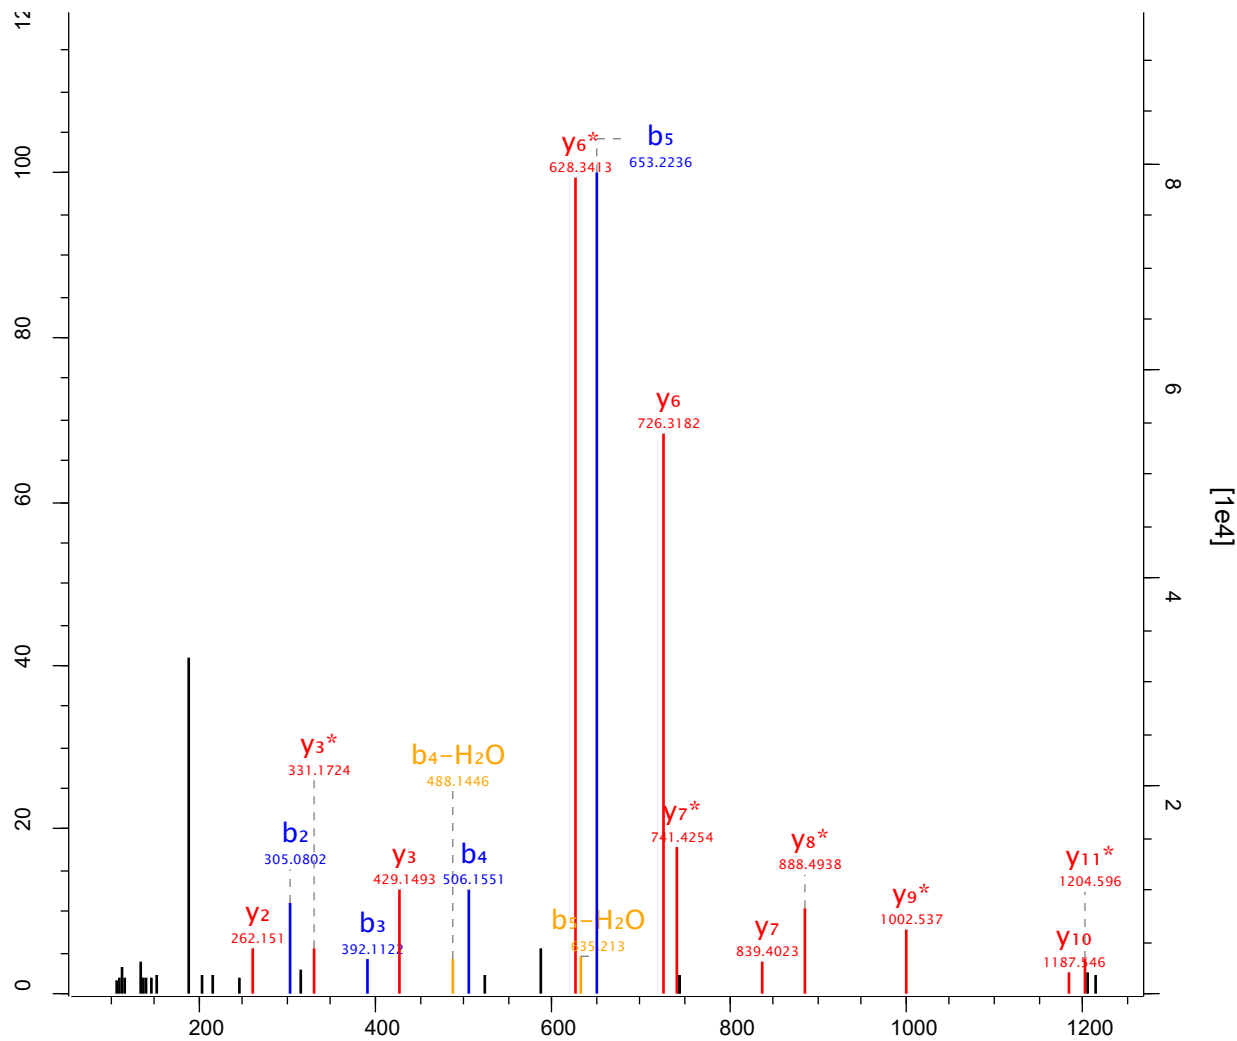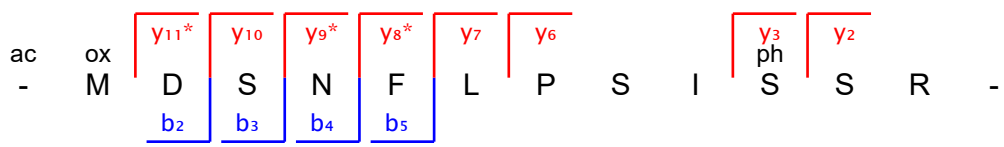

Raw file Scan Method Score m/z  
 sys\_02\_3 3864 FTMS; HCD 144.73 638.73

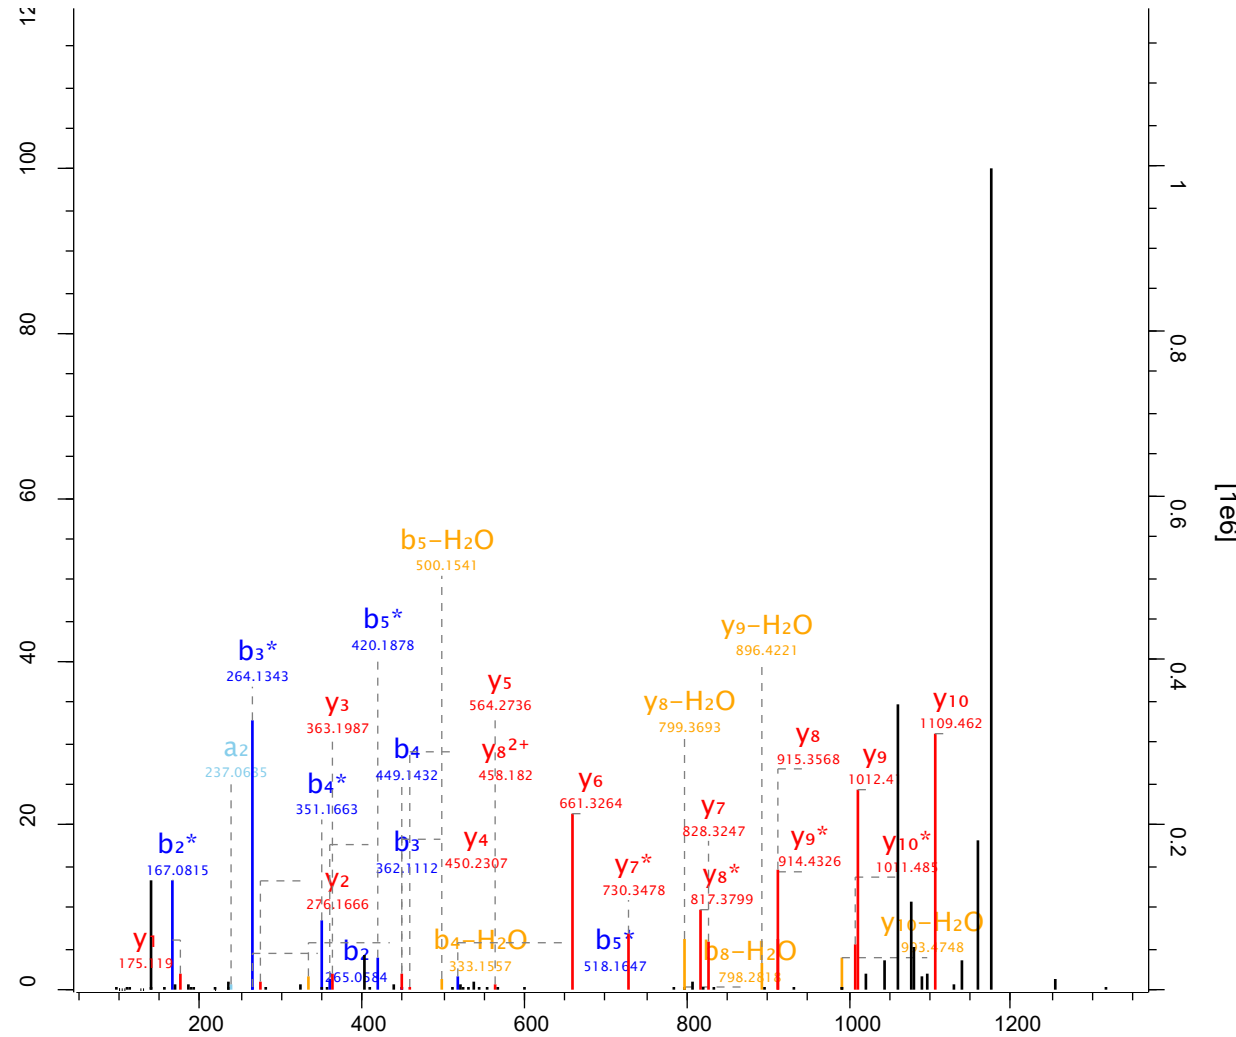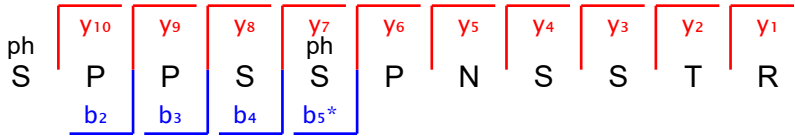



Raw file Scan Method Score m/z  
 sys\_02\_3 4527 FTMS; HCD 138.22 457.22

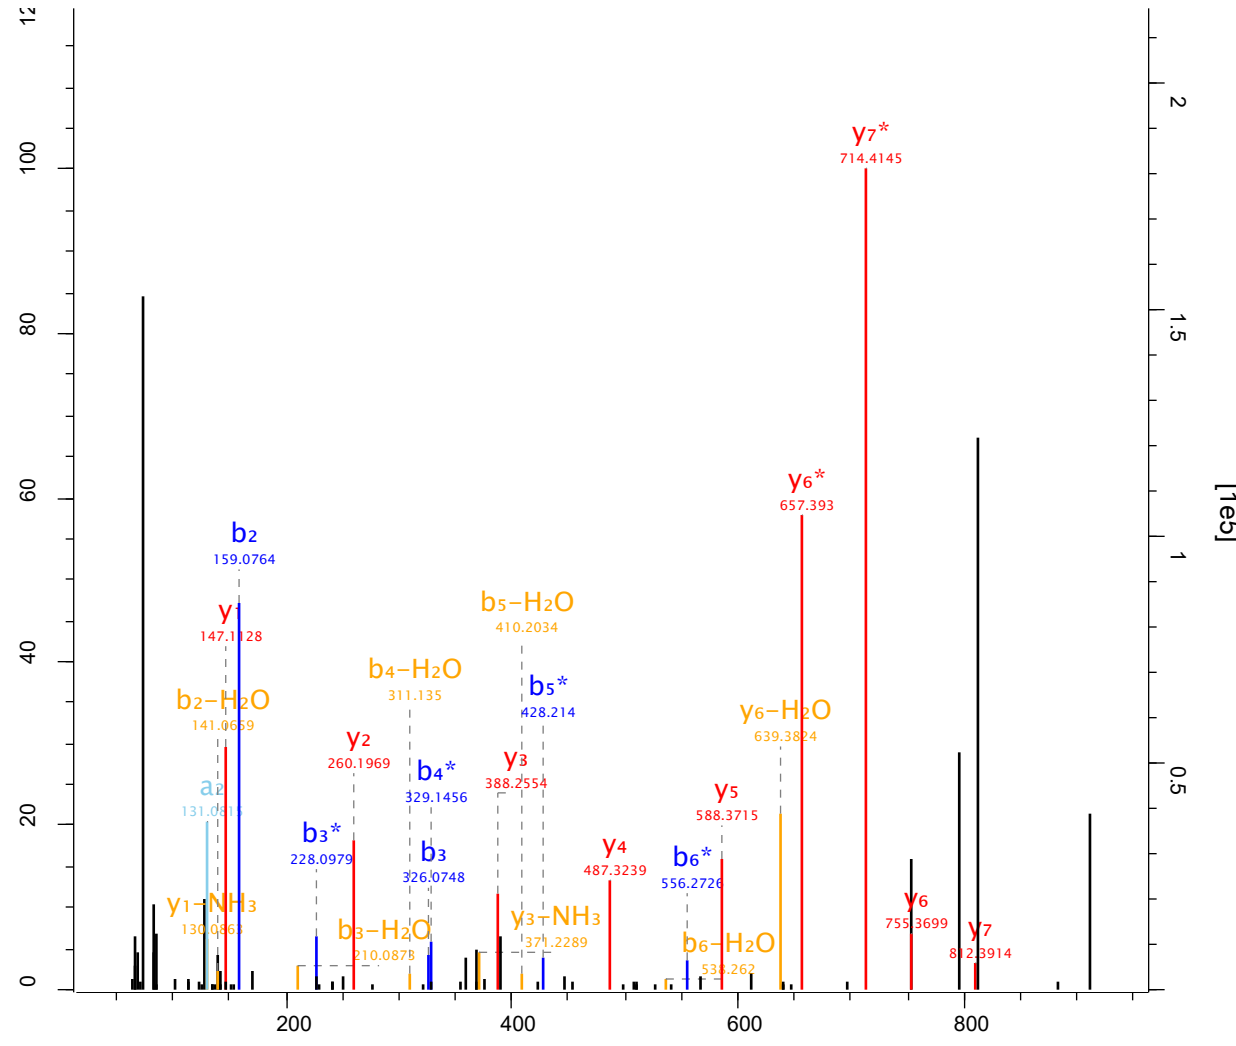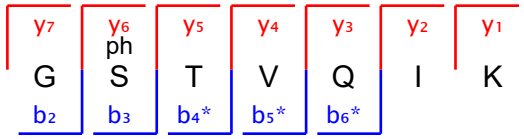

Raw file Scan Method Score m/z  
 sys\_02\_3 5114 FTMS; HCD 92.25 492.74

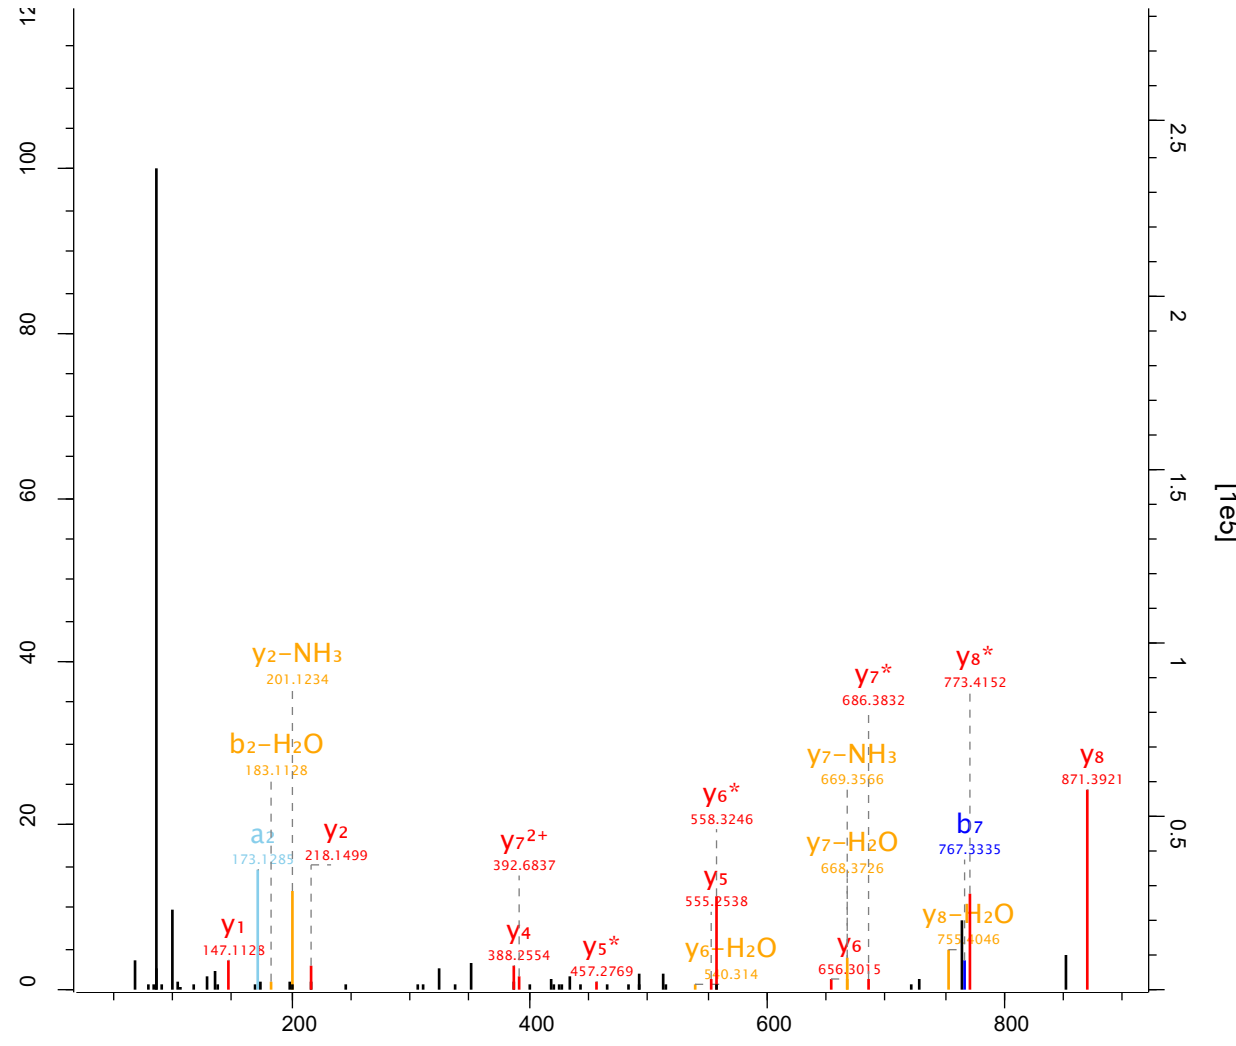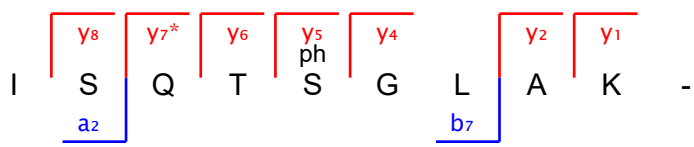

Raw file Scan Method Score m/z  
 sys\_02\_3 7992 FTMS; HCD 78.32 630.78

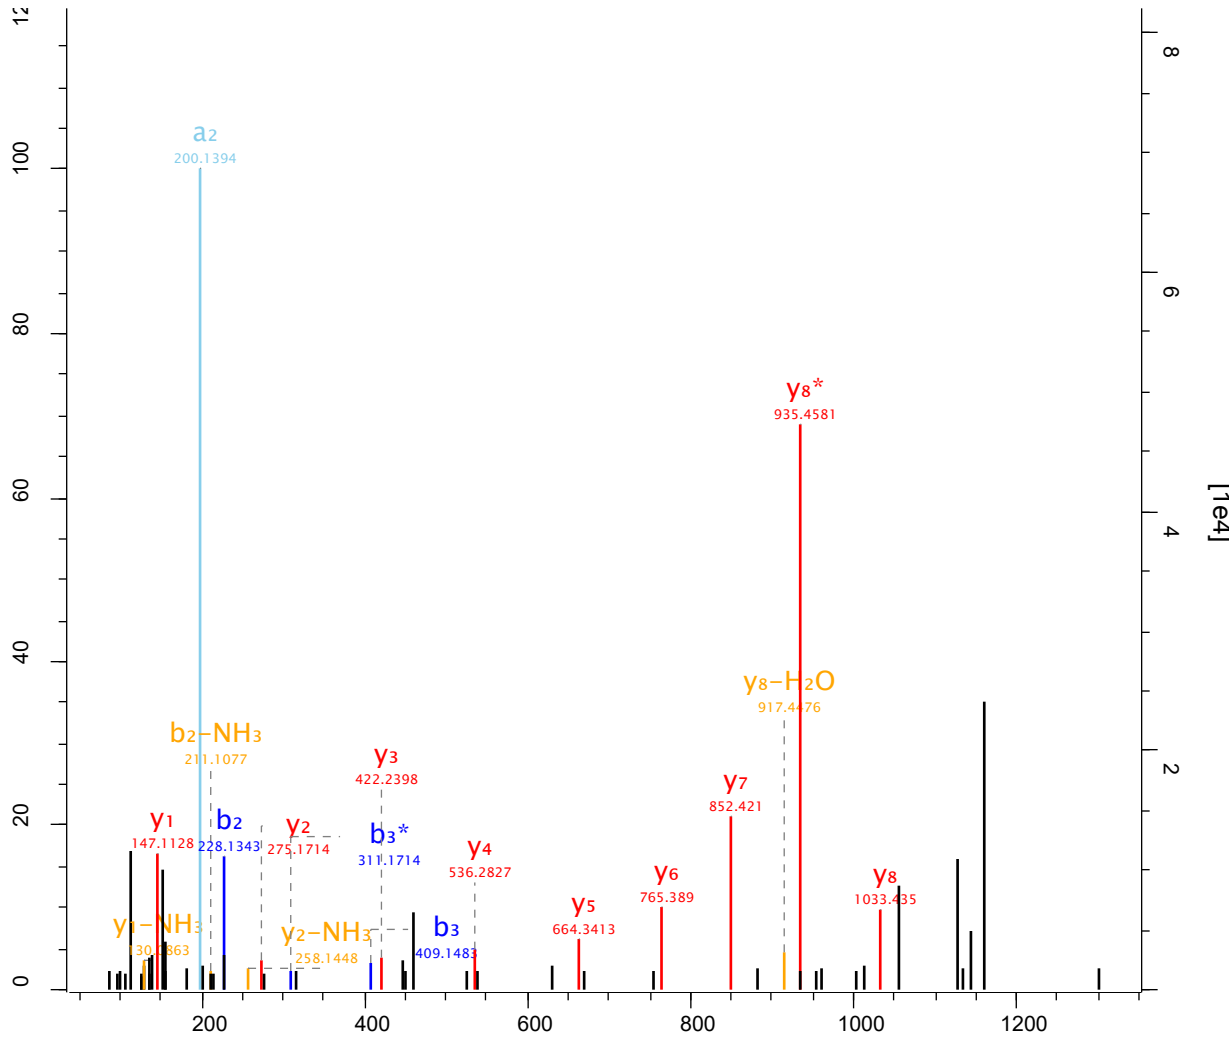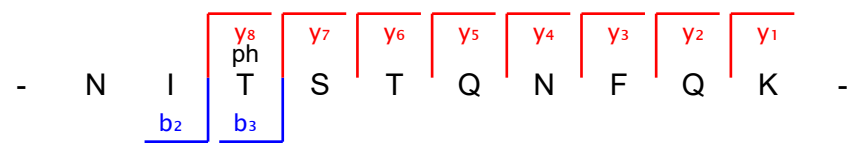

Raw file Scan Method Score m/z  
 sys\_02\_3 8164 FTMS; HCD 60.26 564.23

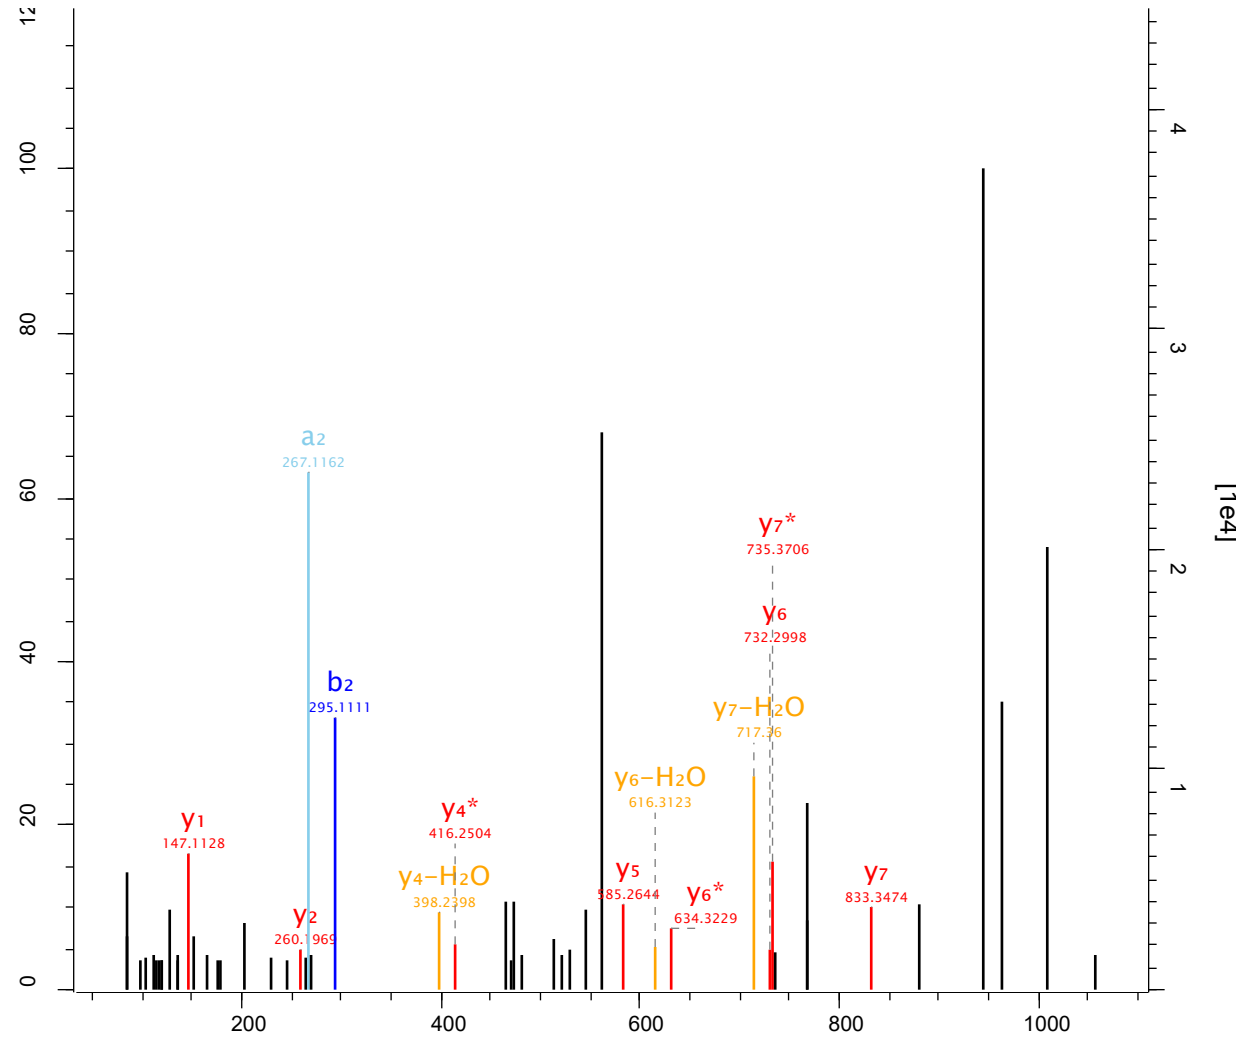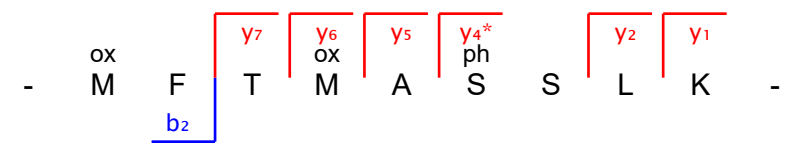

Raw file Scan Method Score m/z  
 sys\_05\_1 13688 FTMS; HCD 136.24 584.22

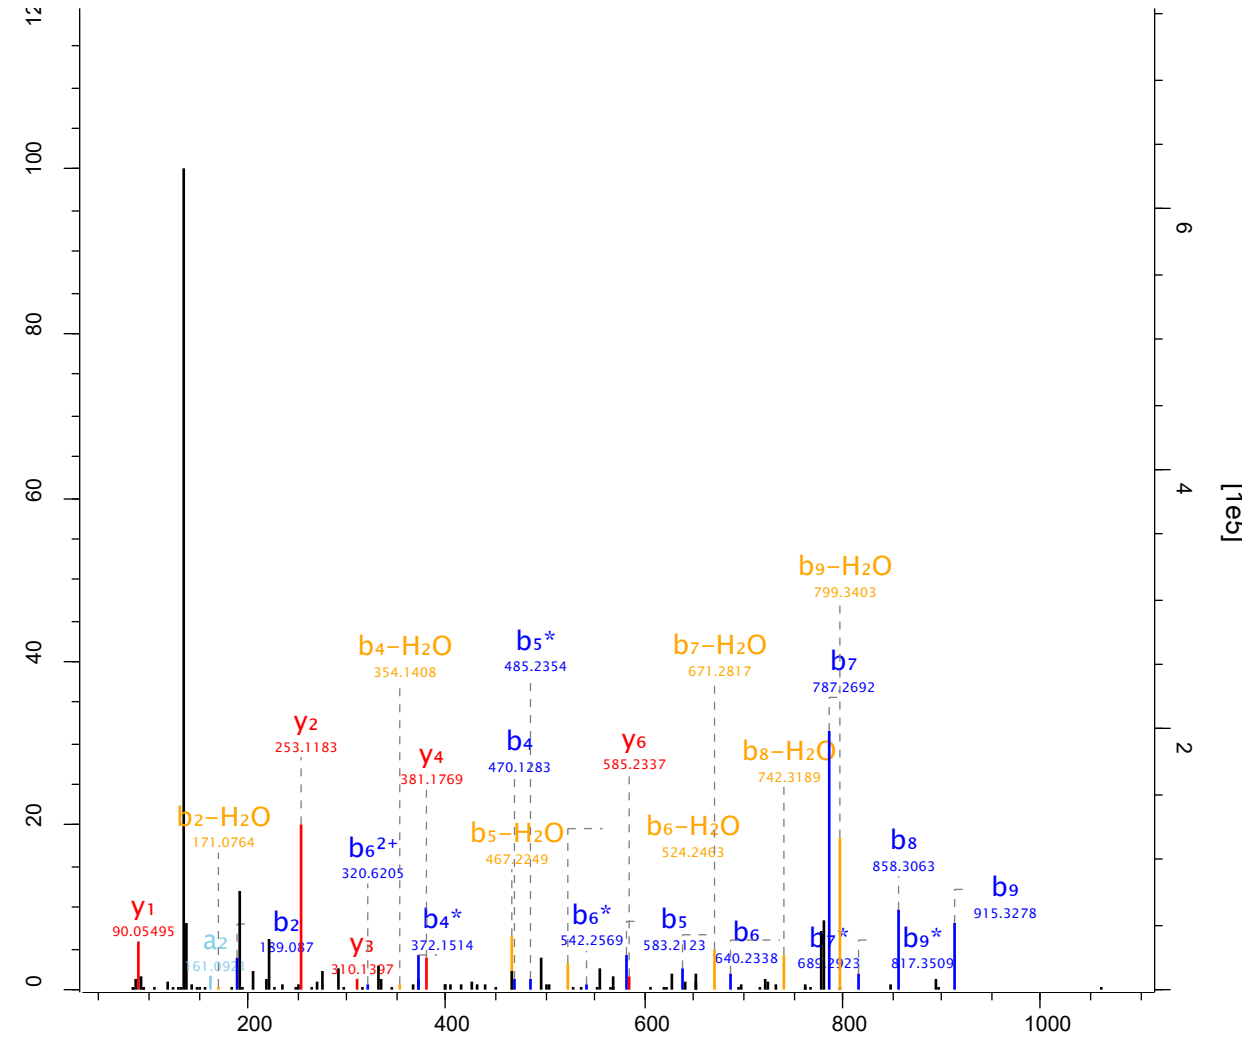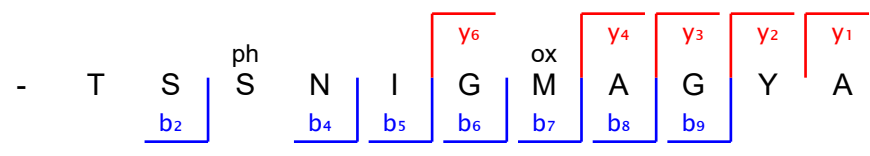

Raw file Scan Method Score m/z  
 sys\_05\_1 21449 FTMS; HCD 50.39 760.82

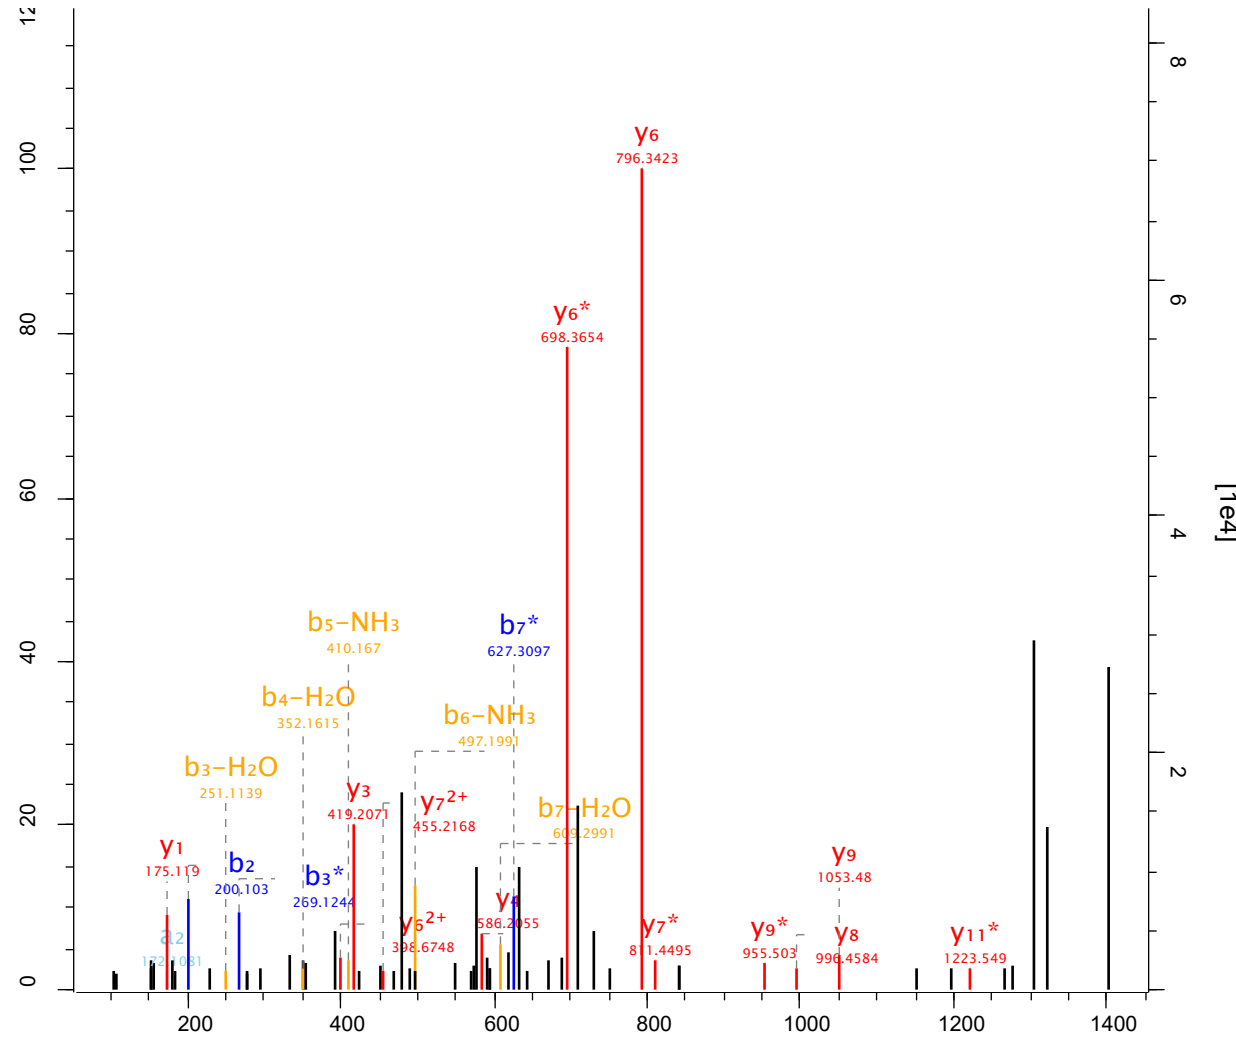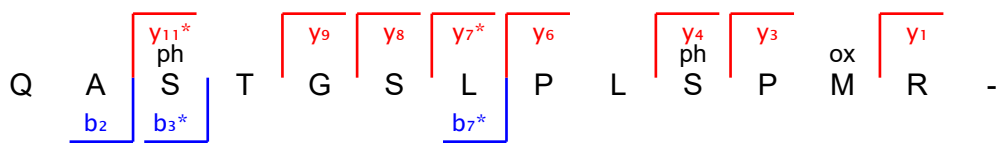

Raw file Scan Method Score m/z  
 sys\_05\_1 23137 FTMS; HCD 89.01 623.95

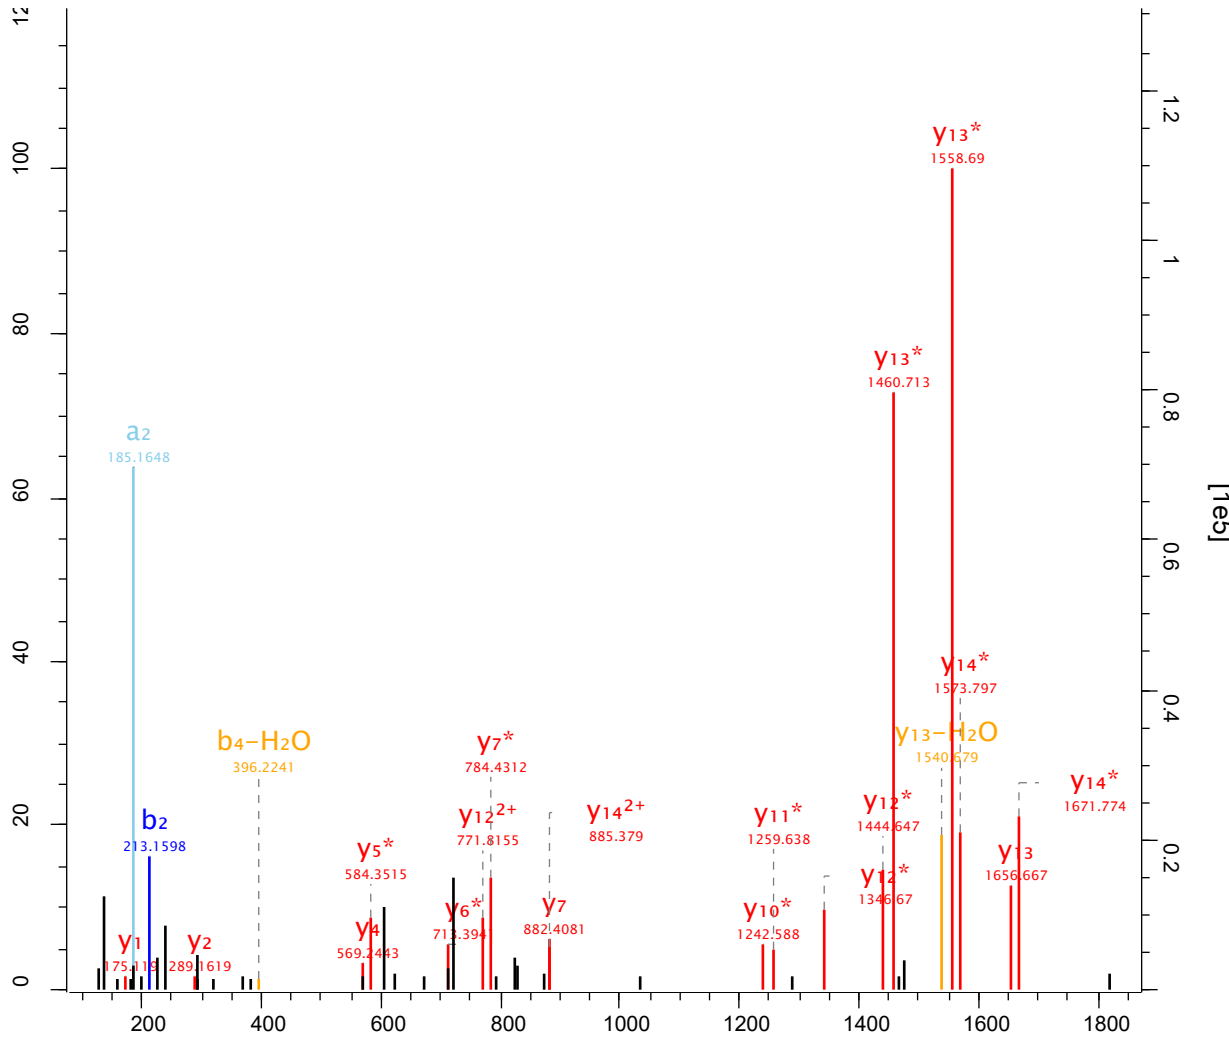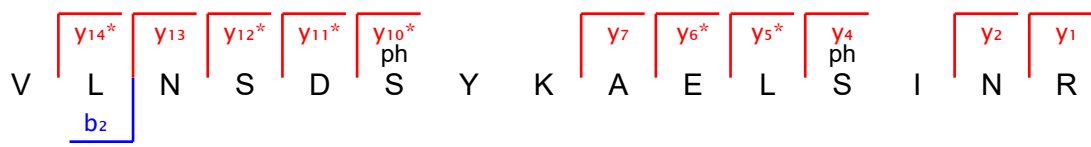

Raw file Scan Method Score m/z  
 sys\_05\_1 24556 FTMS; HCD 77.87 658.33

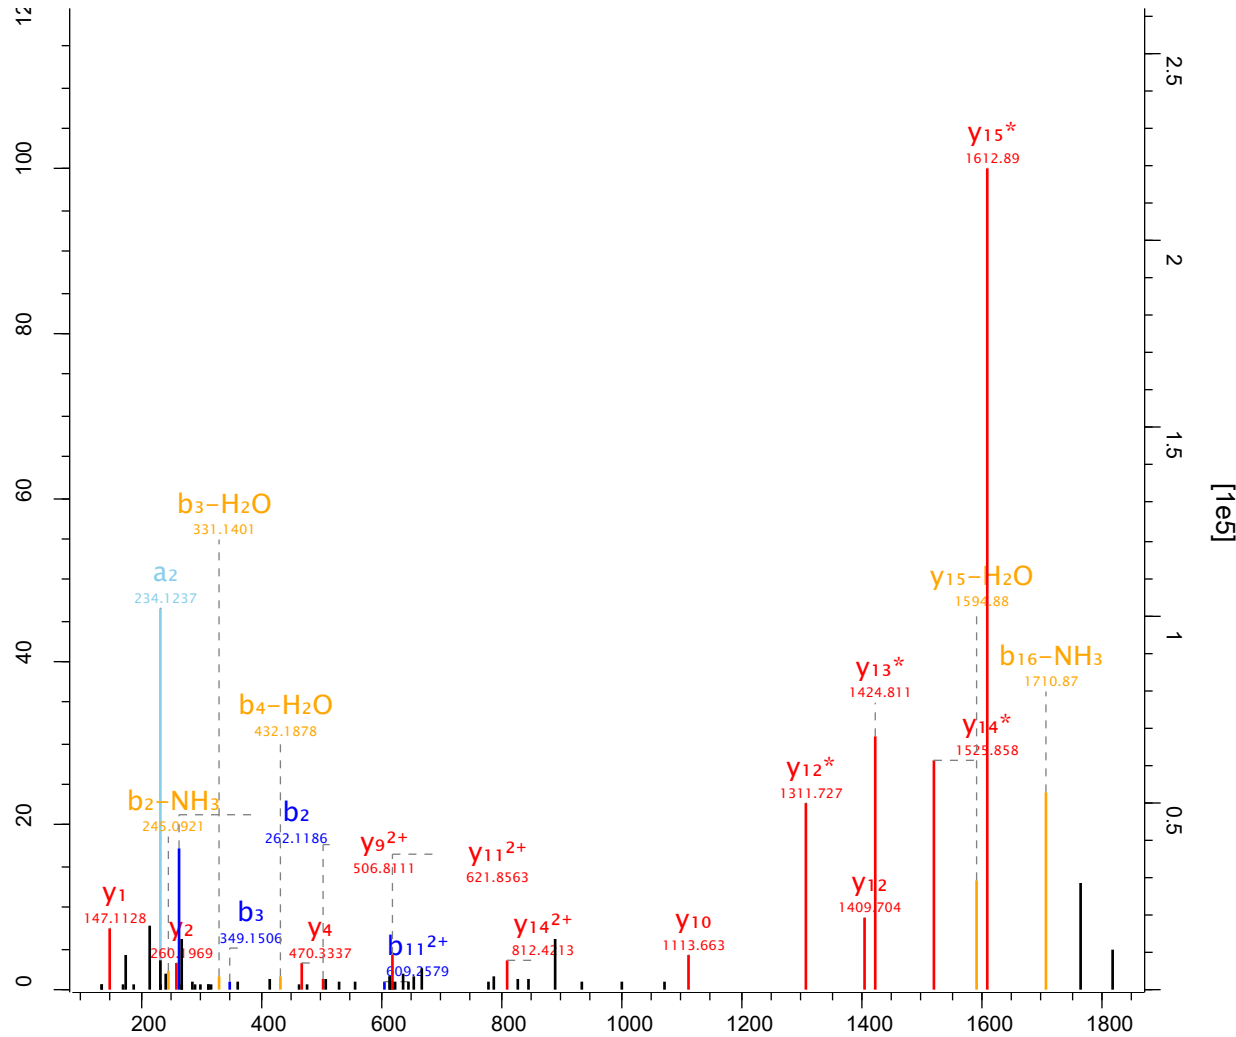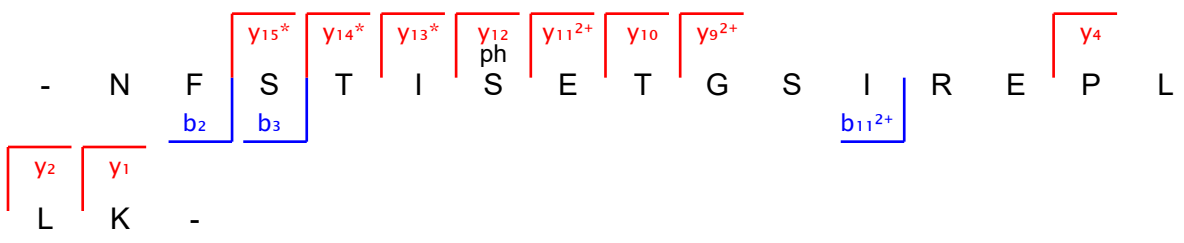



| Raw file | Scan | Method    | Score | m/z    |
|----------|------|-----------|-------|--------|
| sys_05_1 | 2782 | FTMS; HCD | 75.82 | 448.21 |

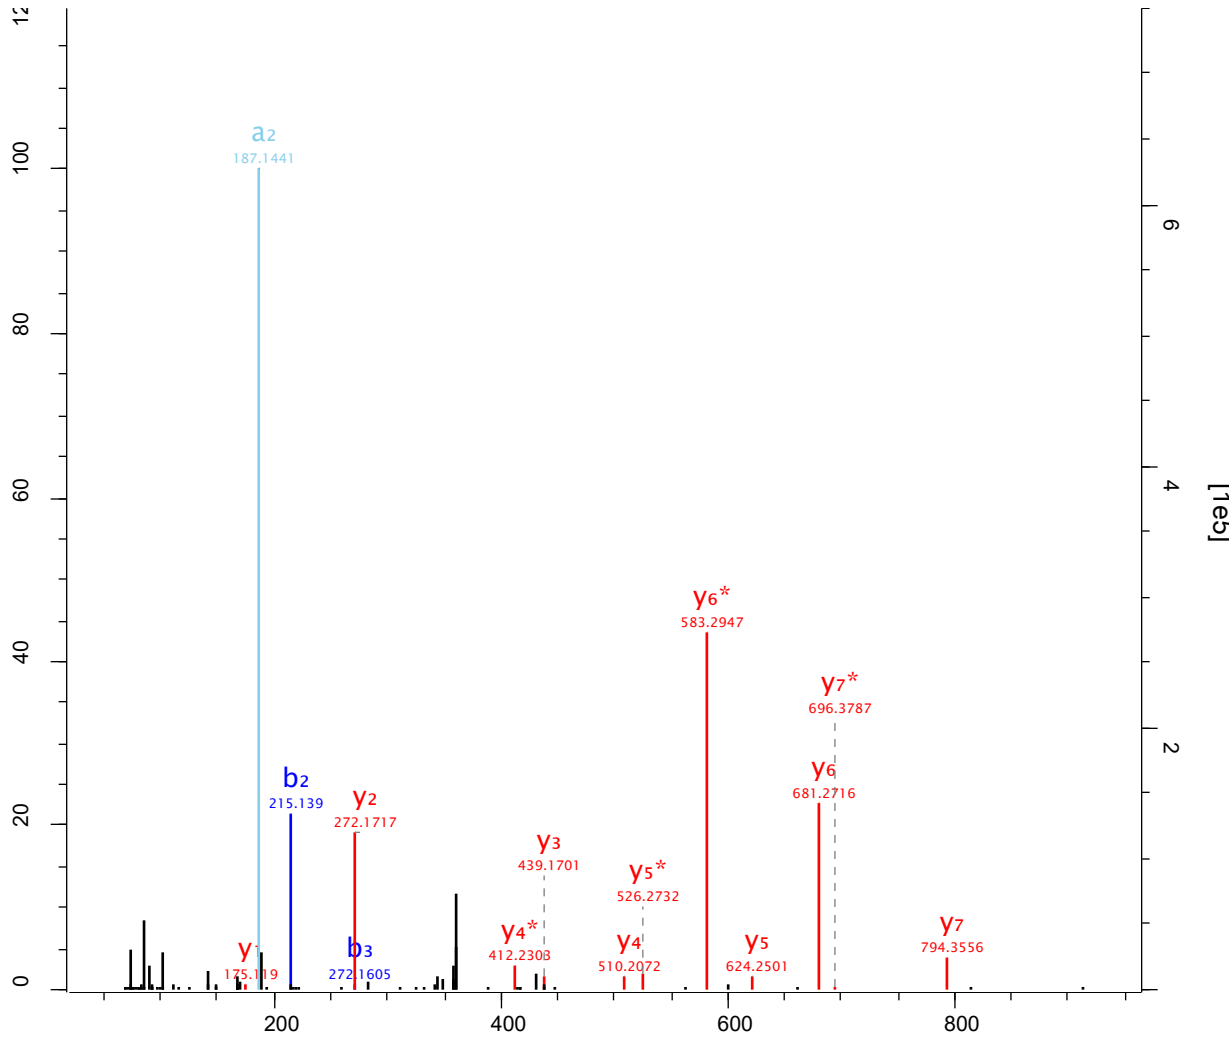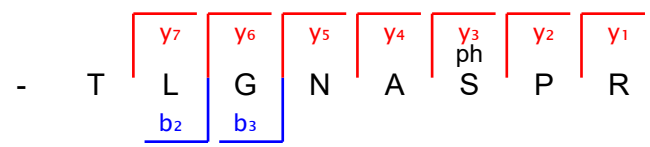

Raw file Scan Method Score m/z  
 sys\_05\_1 30797 FTMS; HCD 78.95 815.87

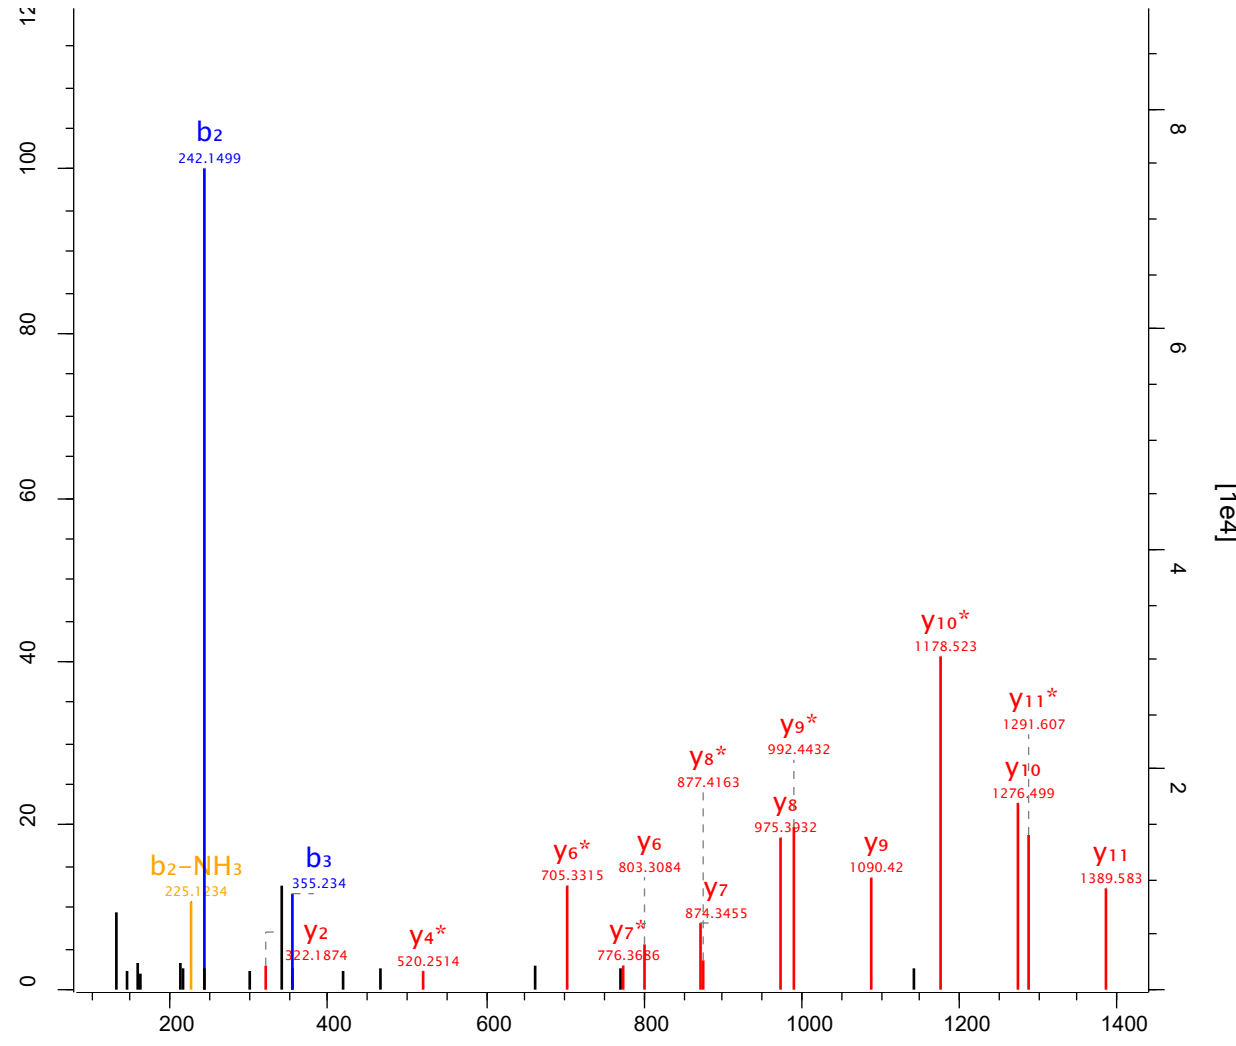

- L Q I W D T A G Q E S F R -

Fragmentation sites are indicated by brackets above the sequence:

- Q-I: b<sub>2</sub>
- I-W: b<sub>3</sub>
- I-W: y<sub>11</sub>
- W-D: y<sub>10</sub>
- D-T: y<sub>9</sub>
- T-A: y<sub>8</sub>
- A-G: y<sub>7</sub>
- G-Q: y<sub>6</sub>
- Q-E: y<sub>4</sub>\*
- E-S: ph
- S-F: y<sub>2</sub>

Raw file Scan Method Score m/z  
 sys\_05\_1 31096 FTMS; HCD 130.83 684.65

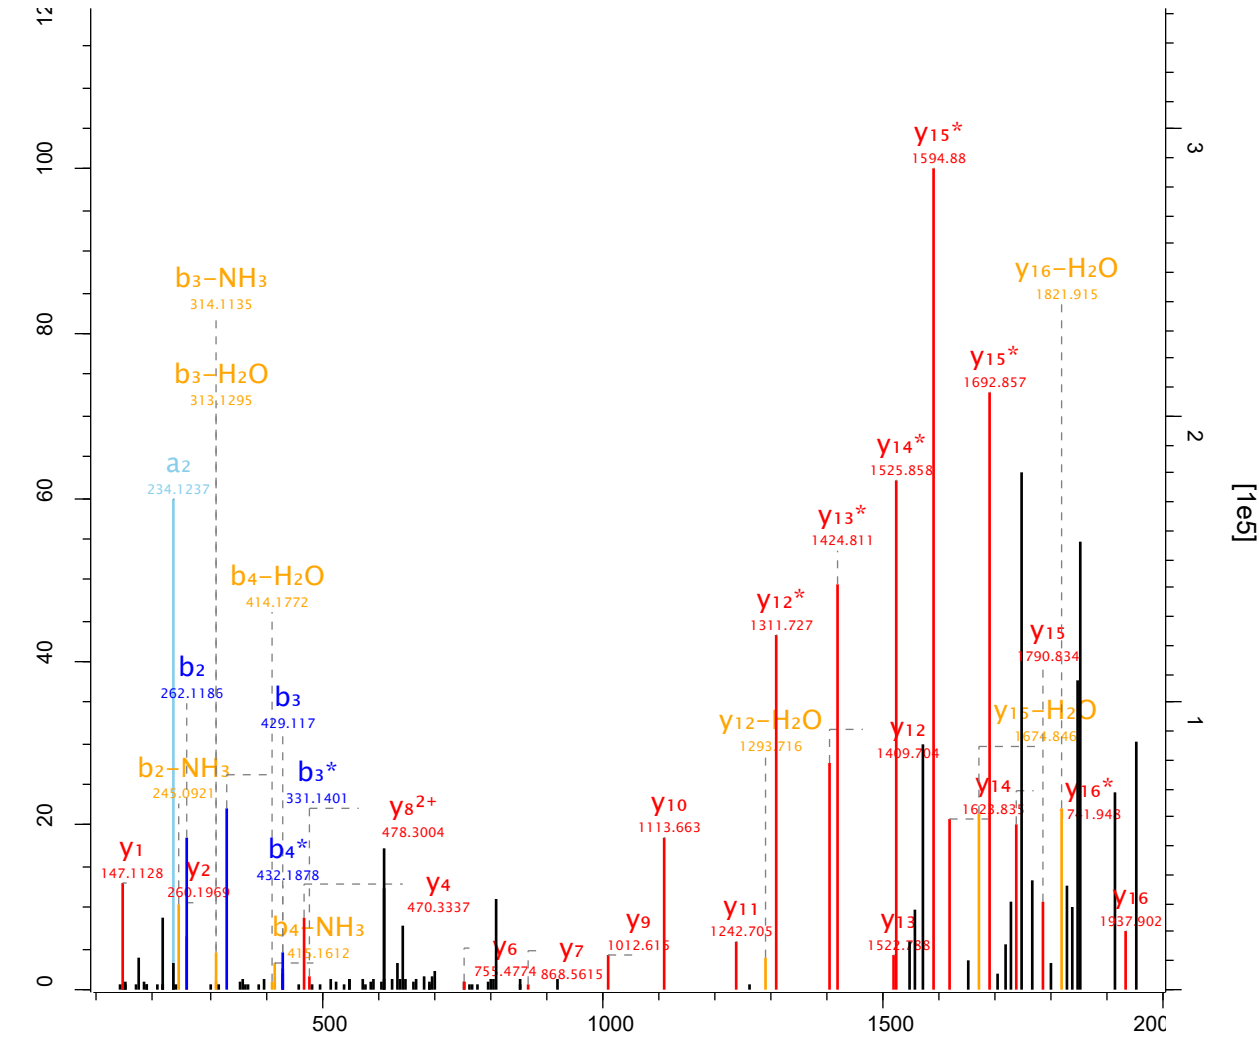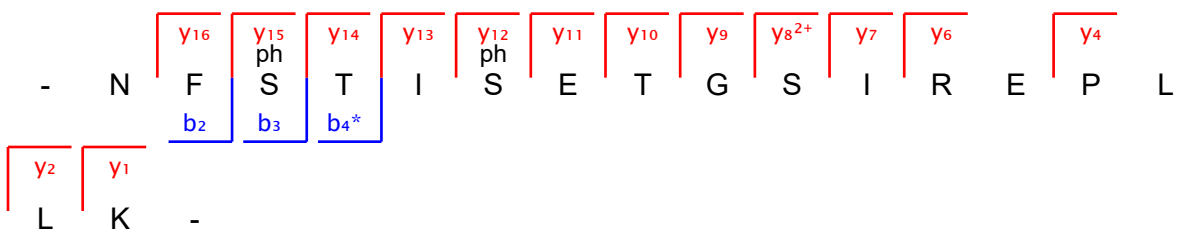

Raw file Scan Method Score m/z  
 sys\_05\_1 32947 FTMS; HCD 48.29 814.36

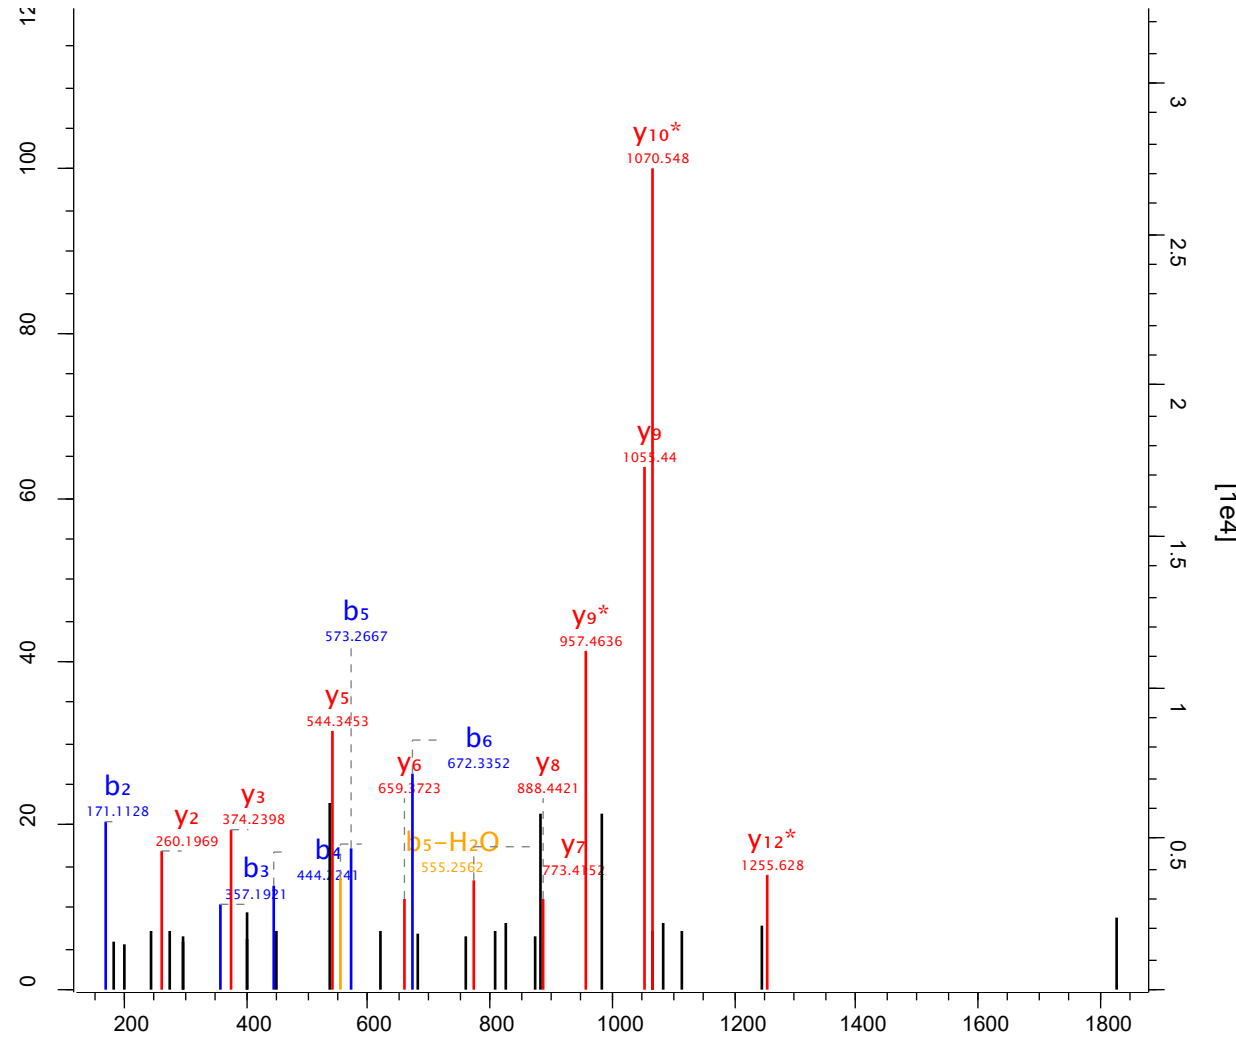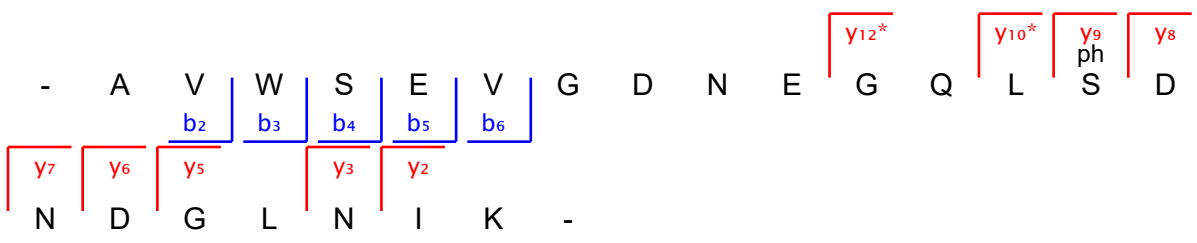

Raw file Scan Method Score m/z  
 sys\_05\_1 3477 FTMS; HCD 113.38 485.7

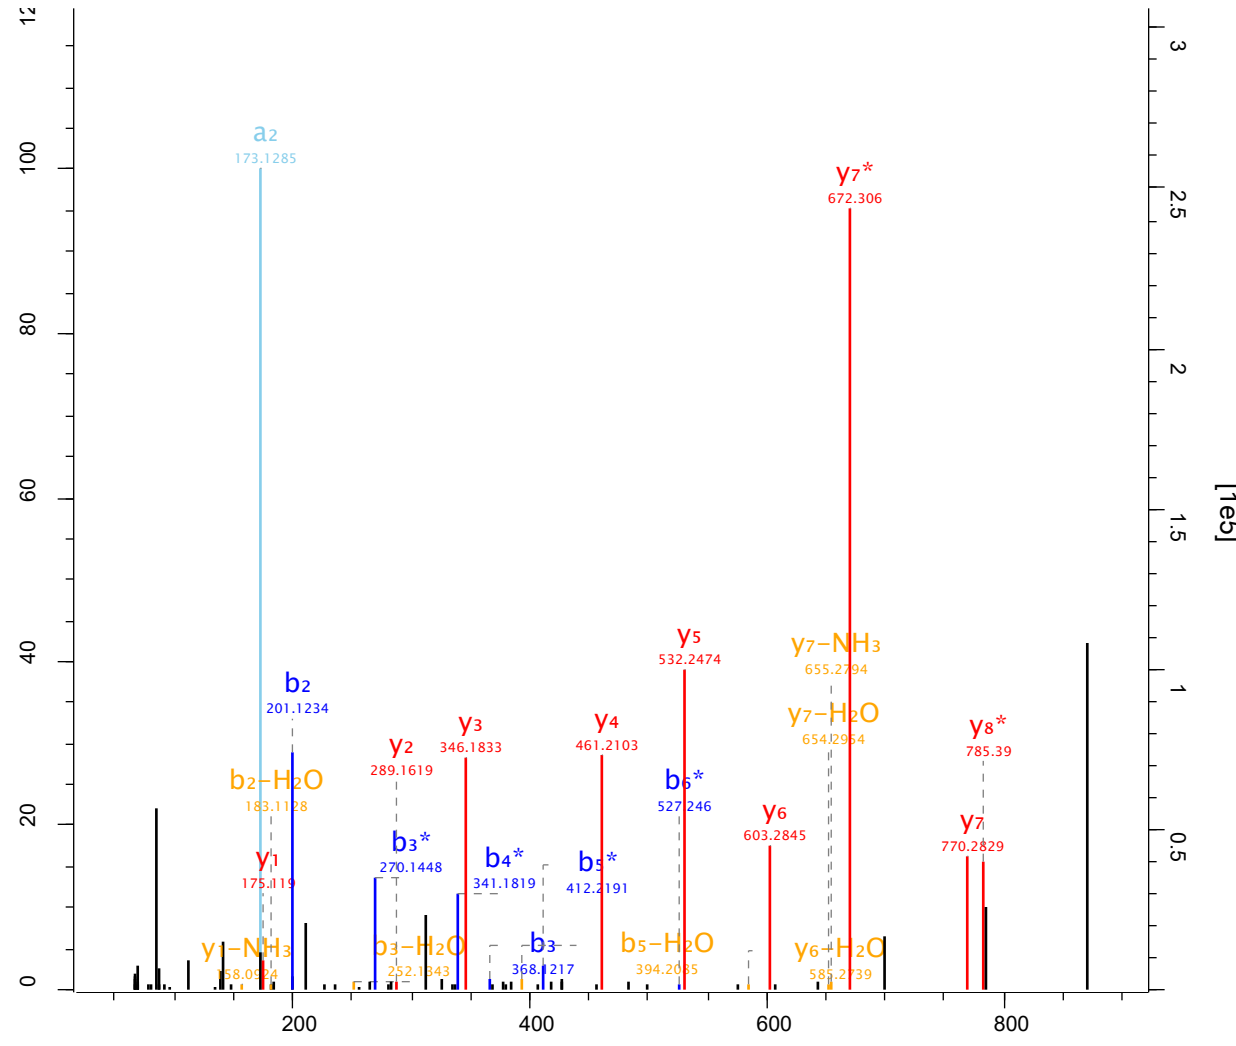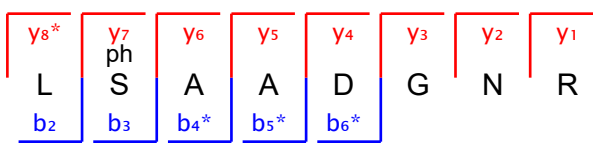

Raw file Scan Method Score m/z  
 sys\_05\_1 39450 FTMS; HCD 146.78 736.8

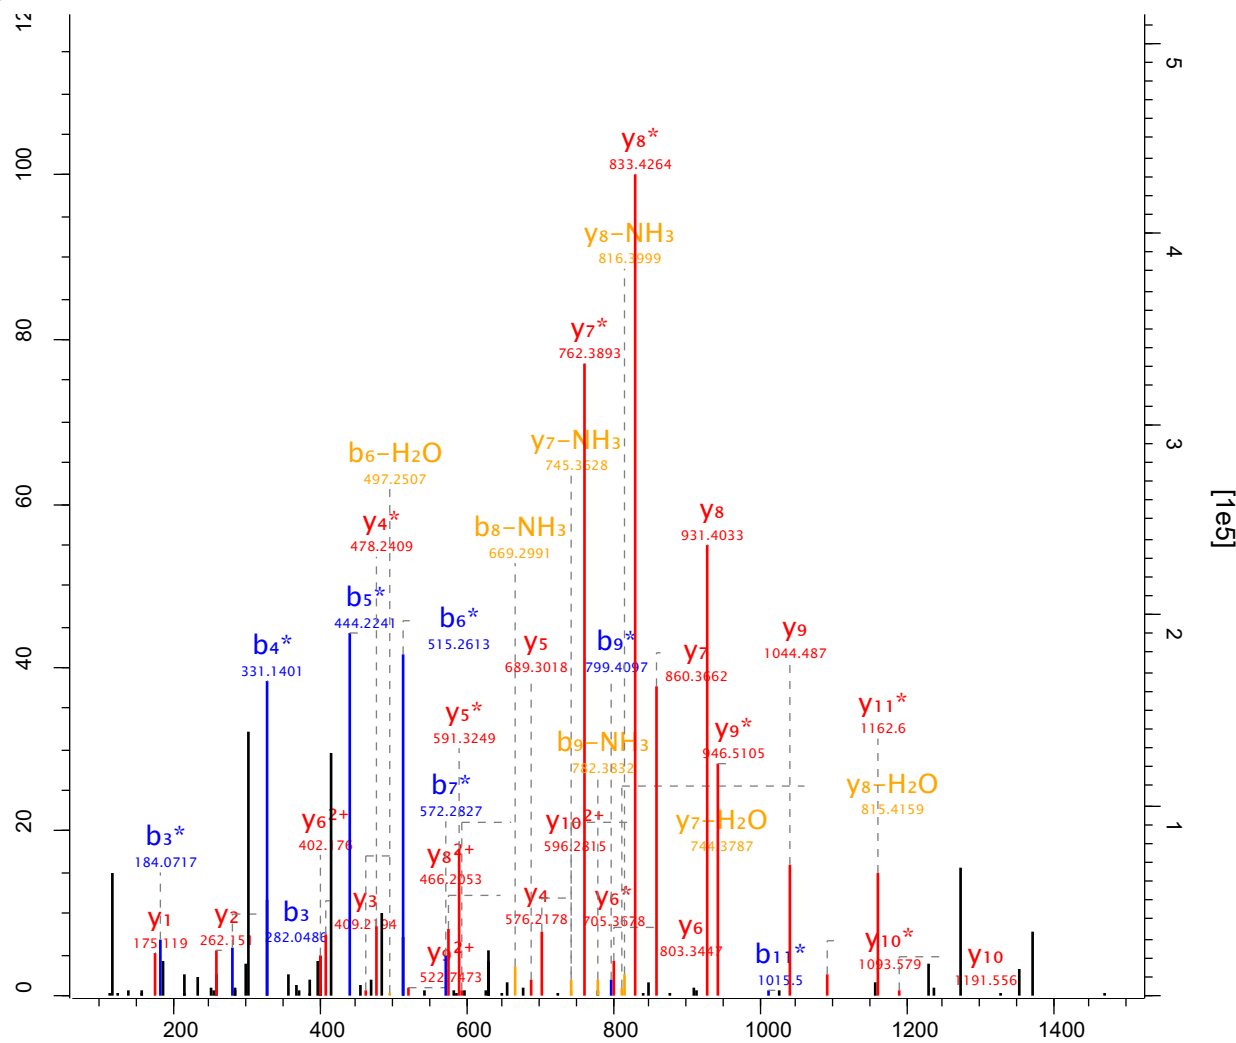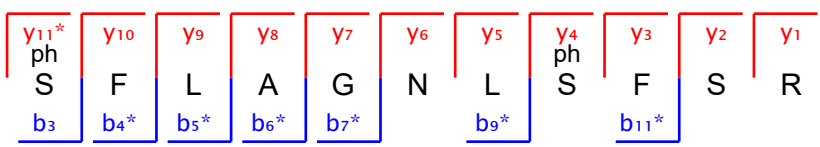

Raw file Scan Method Score m/z  
 sys\_05\_1 3997 FTMS; HCD 107.11 461.7

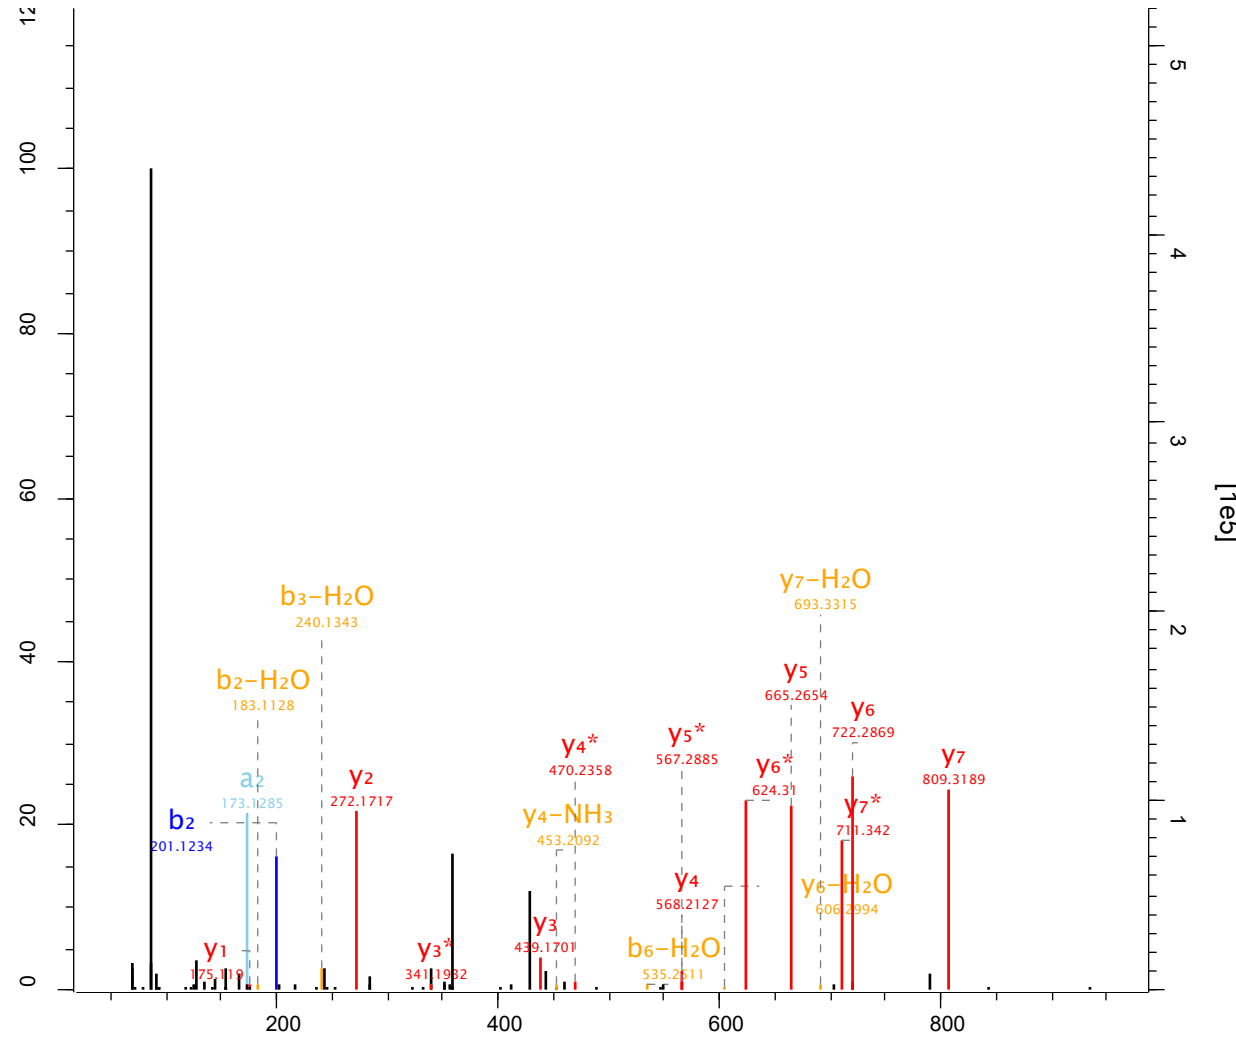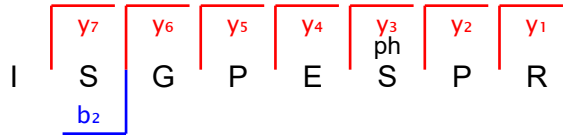

Raw file Scan Method Score m/z  
 sys\_05\_1 40953 FTMS; HCD 77.75 725.34

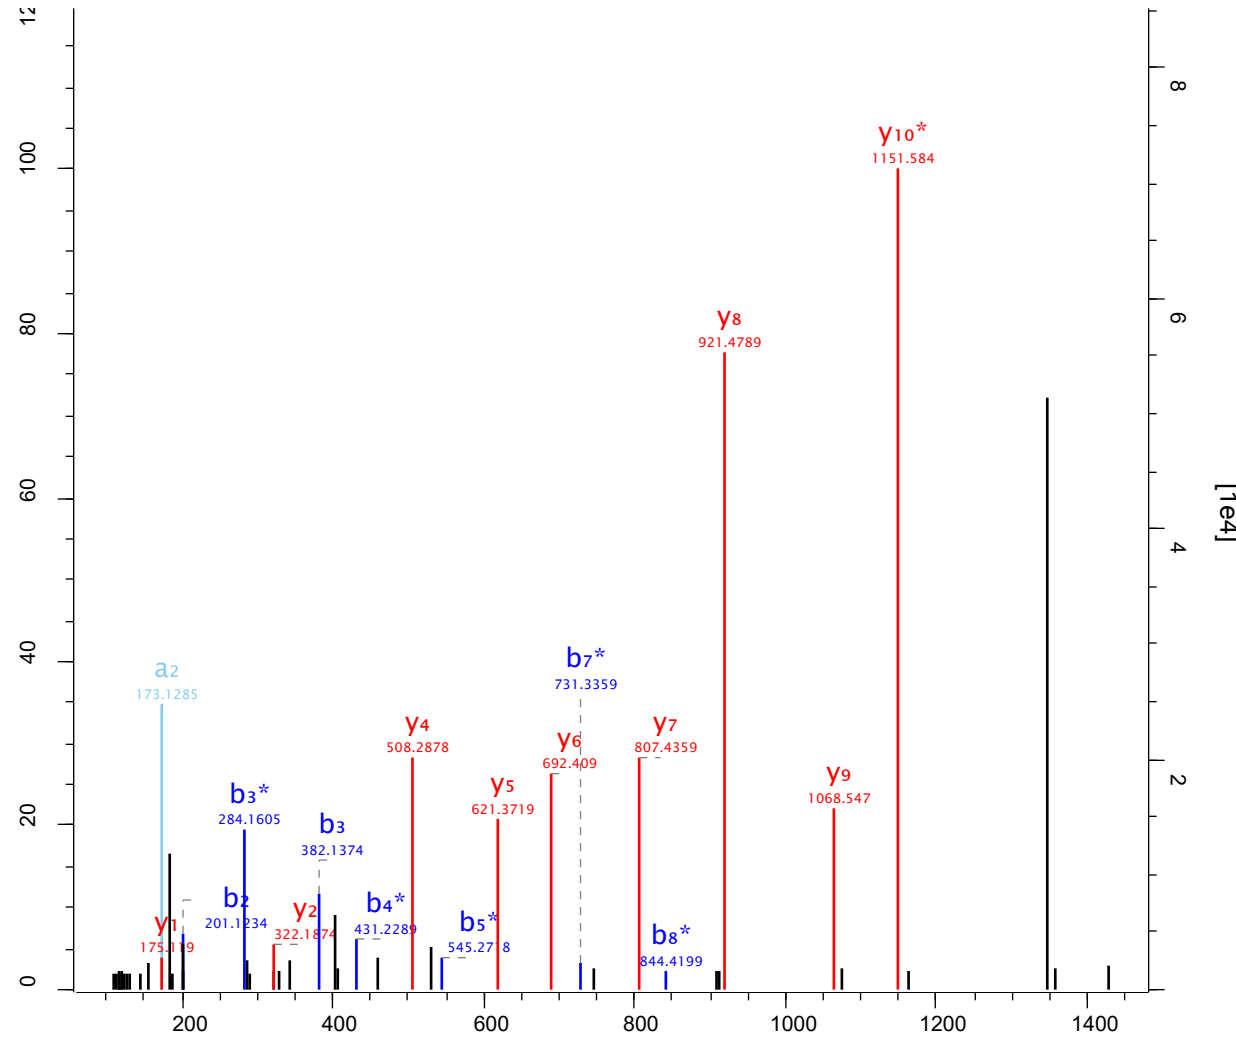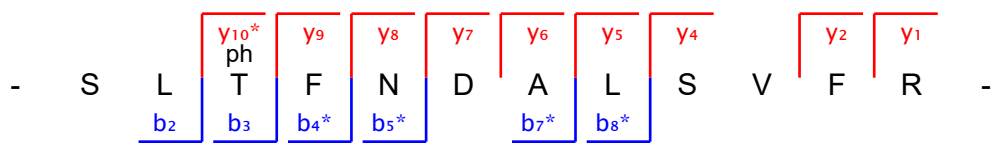



Raw file Scan Method Score m/z  
 sys\_05\_1 42484 FTMS; HCD 138.01 665.3

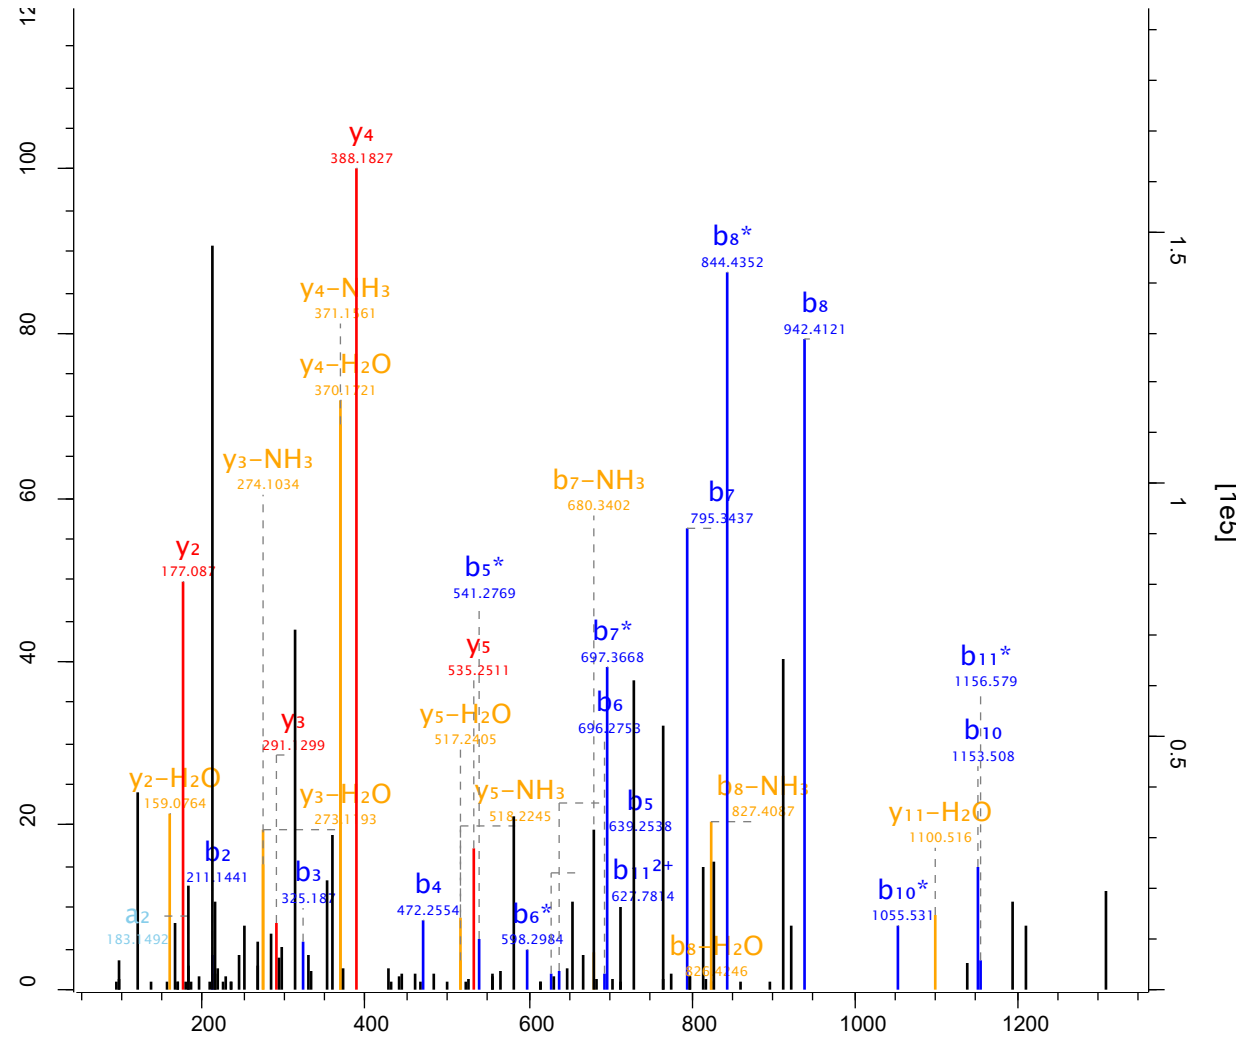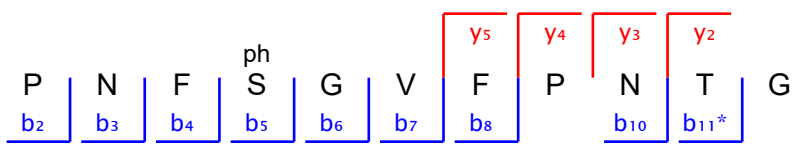

Raw file Scan Method Score m/z  
 sys\_05\_1 43681 FTMS; HCD 75.91 699.81

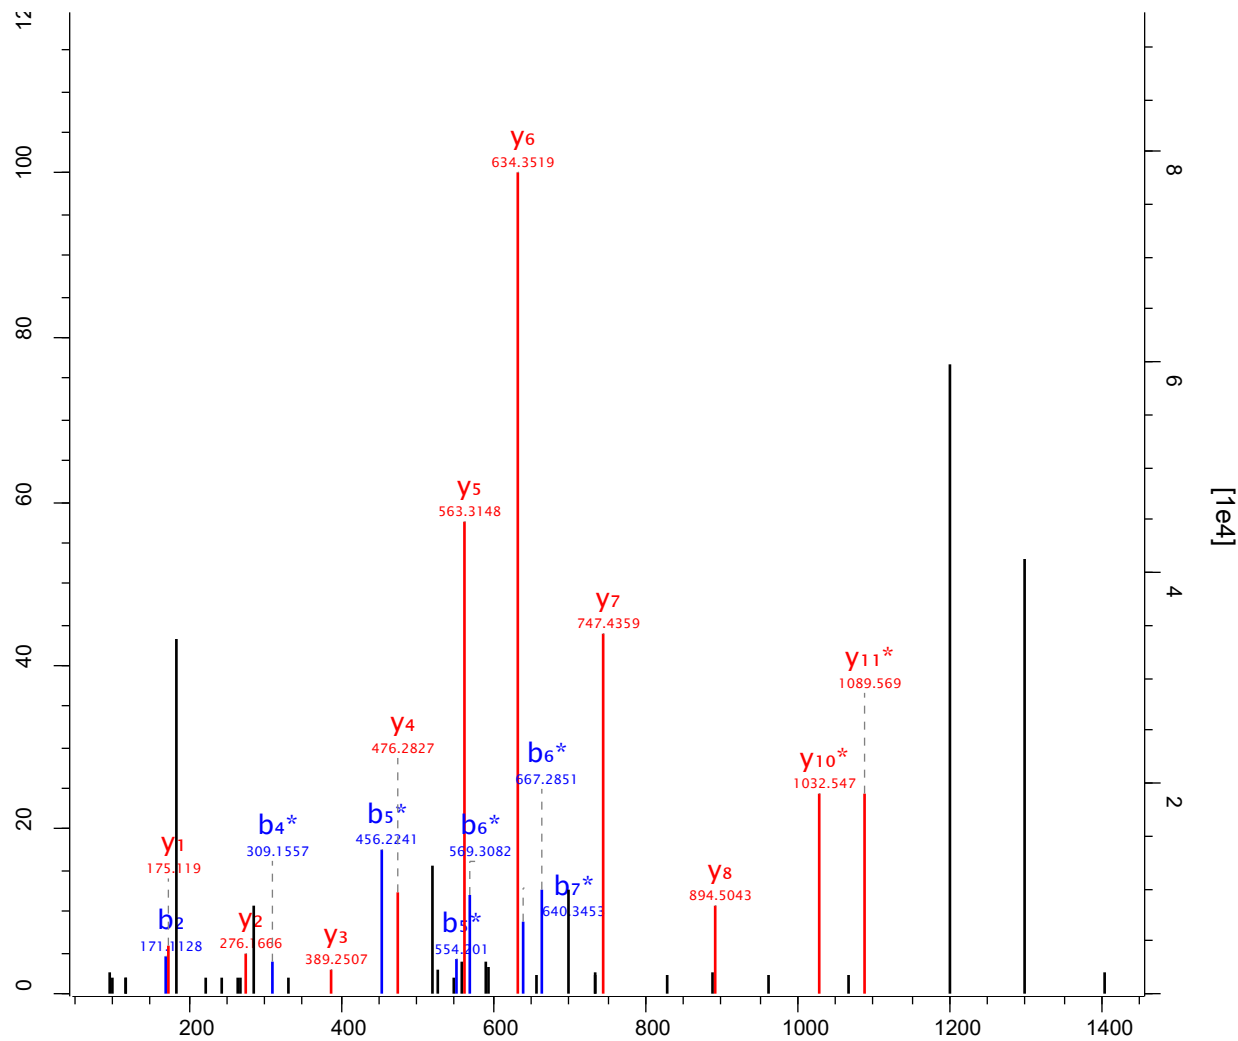

- L y11\* y10\* ph S y8 y7 y6 y5 y4 y3 y2 y1 -  
 G b2 S b4\* F b5\* L b6\* A b7\* S S L T R

Raw file Scan Method Score m/z  
 sys\_05\_1 44181 FTMS; HCD 45.94 1008.8

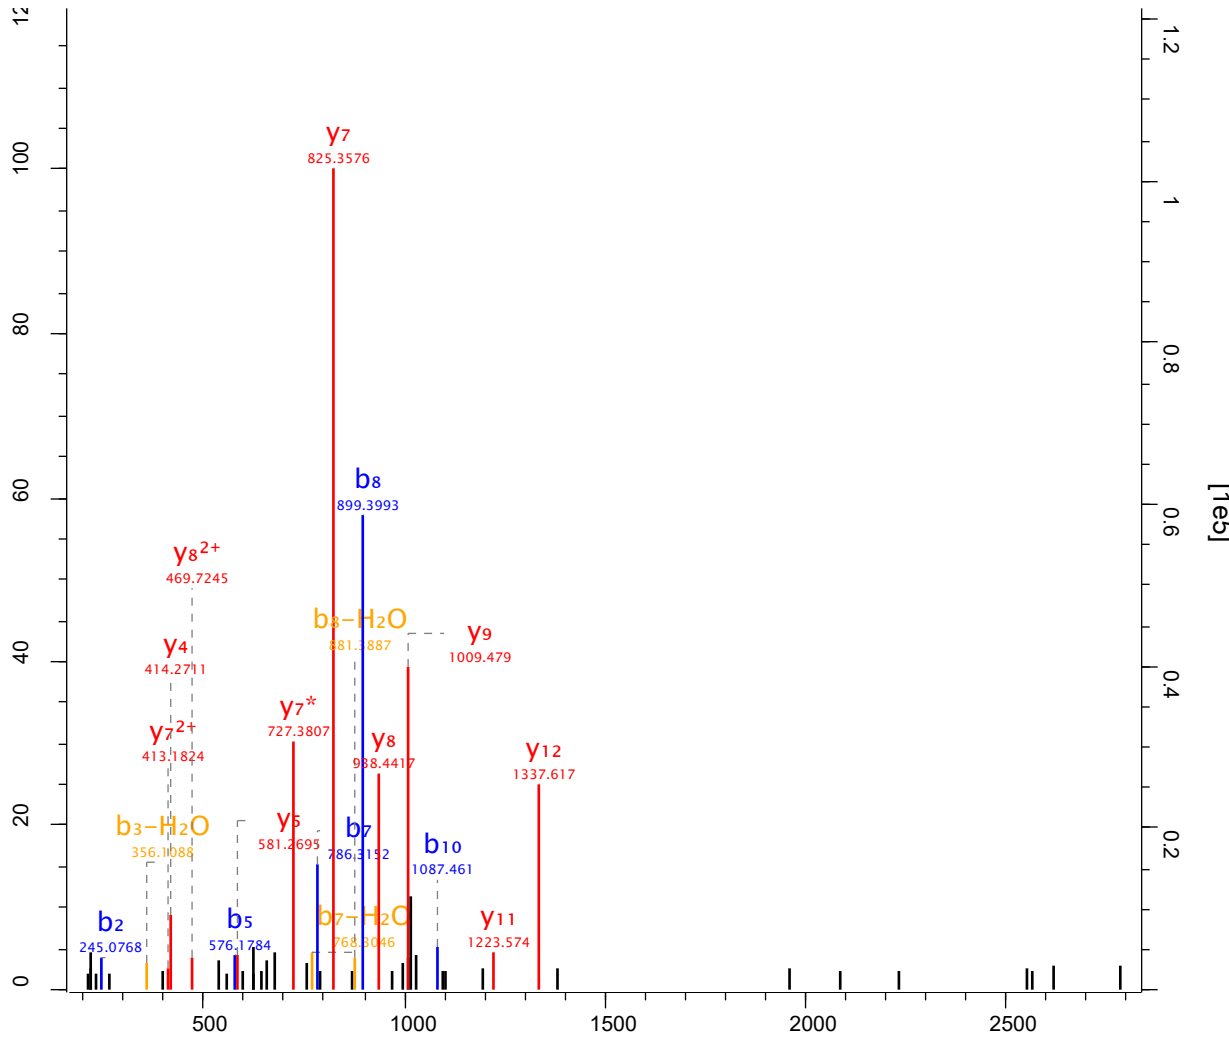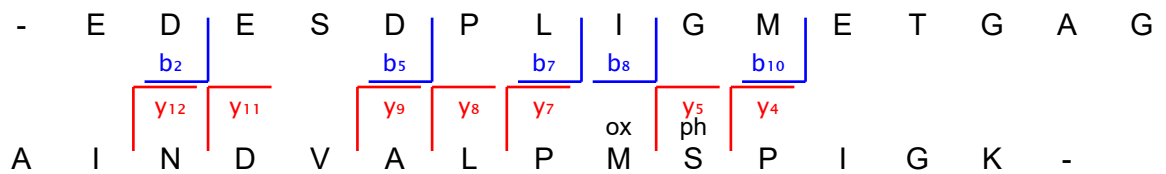

Raw file Scan Method Score m/z  
 sys\_05\_1 45065 FTMS; HCD 58.43 827.38

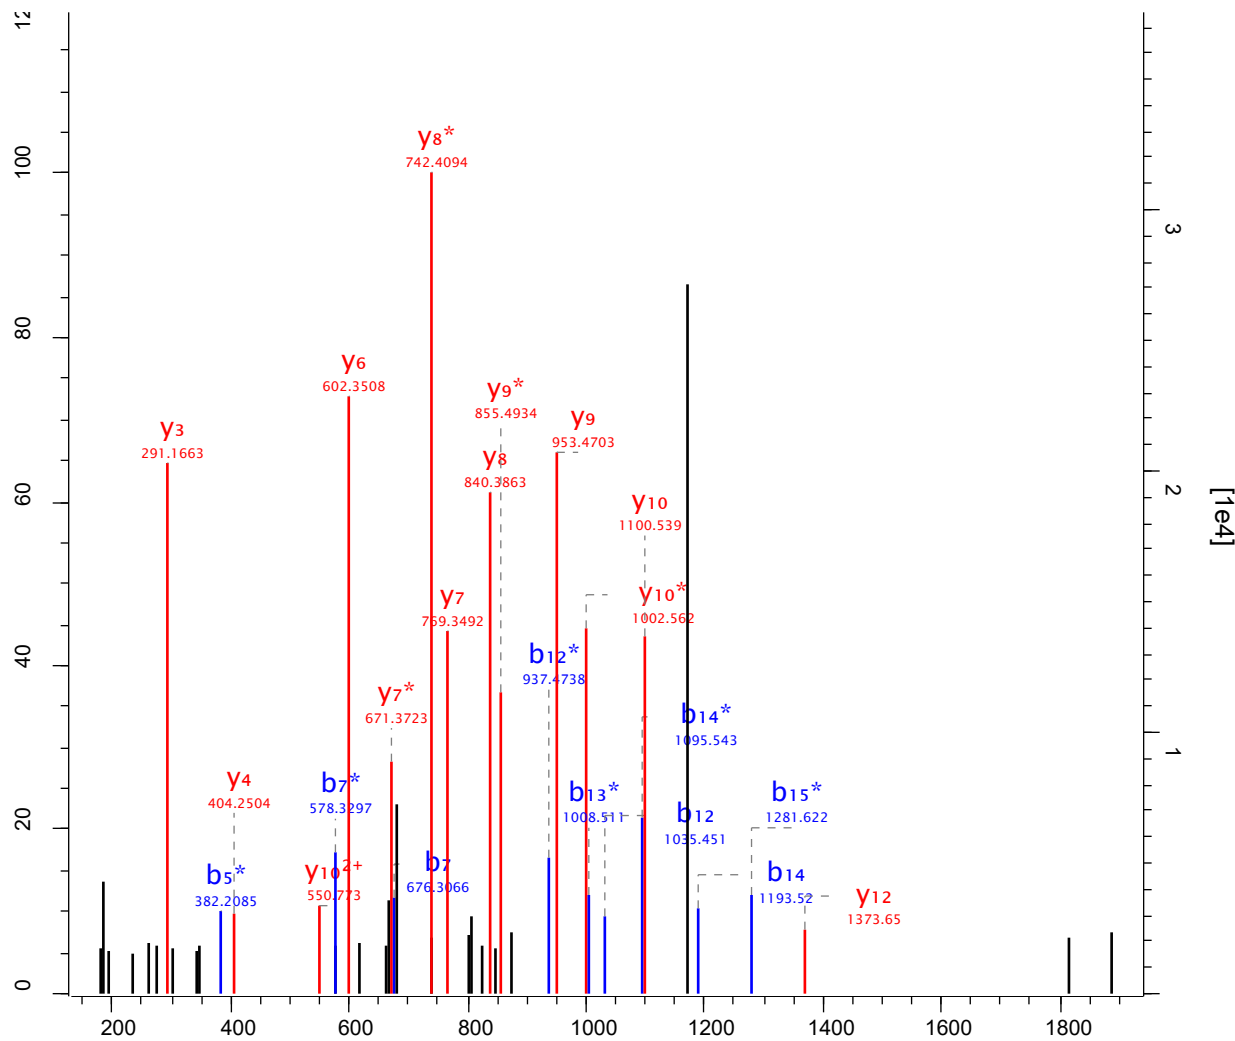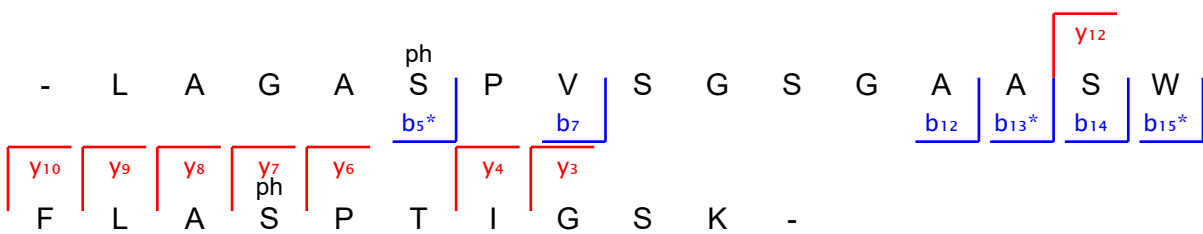

Raw file Scan Method Score m/z  
 sys\_05\_1 45327 FTMS; HCD 181.58 691.78

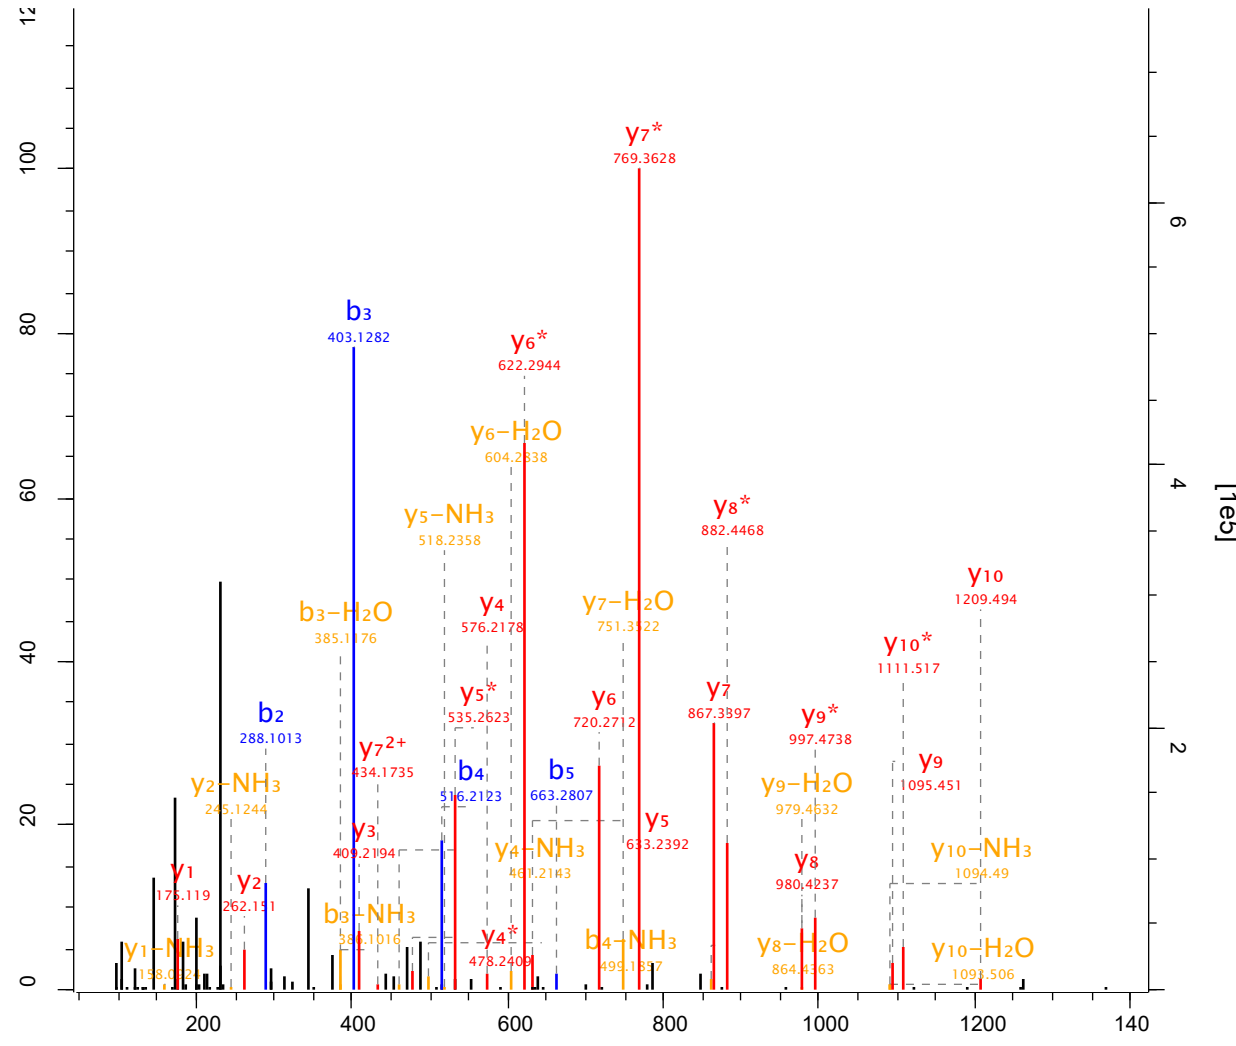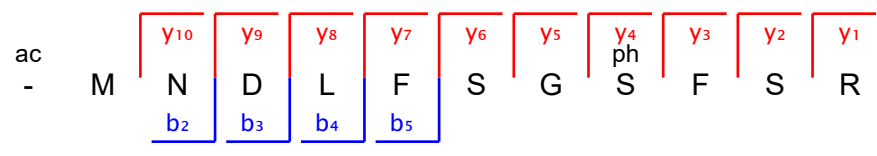

Raw file Scan Method Score m/z  
 sys\_05\_1 45334 FTMS; HCD 127.32 917.86

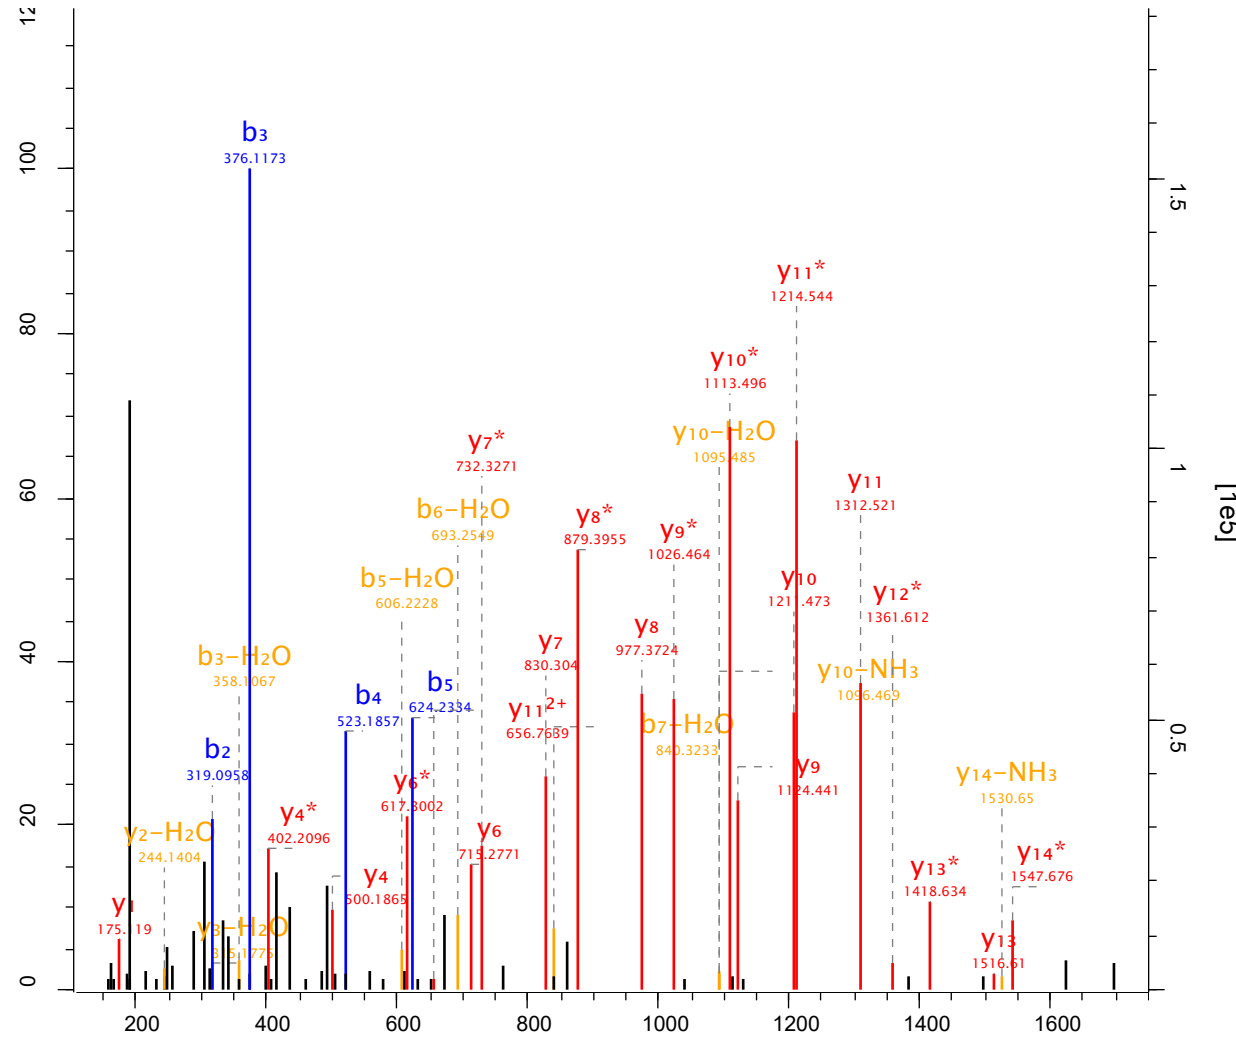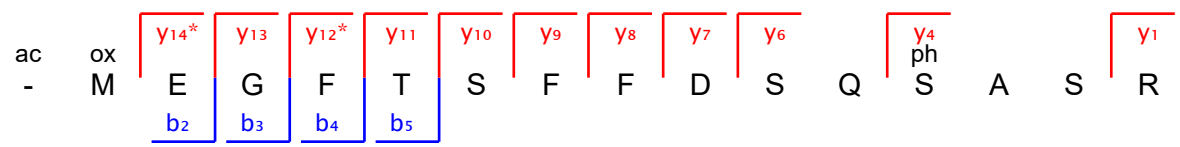

| Raw file | Scan | Method    | Score | m/z    |
|----------|------|-----------|-------|--------|
| sys_05_1 | 7339 | FTMS; HCD | 92.54 | 427.71 |

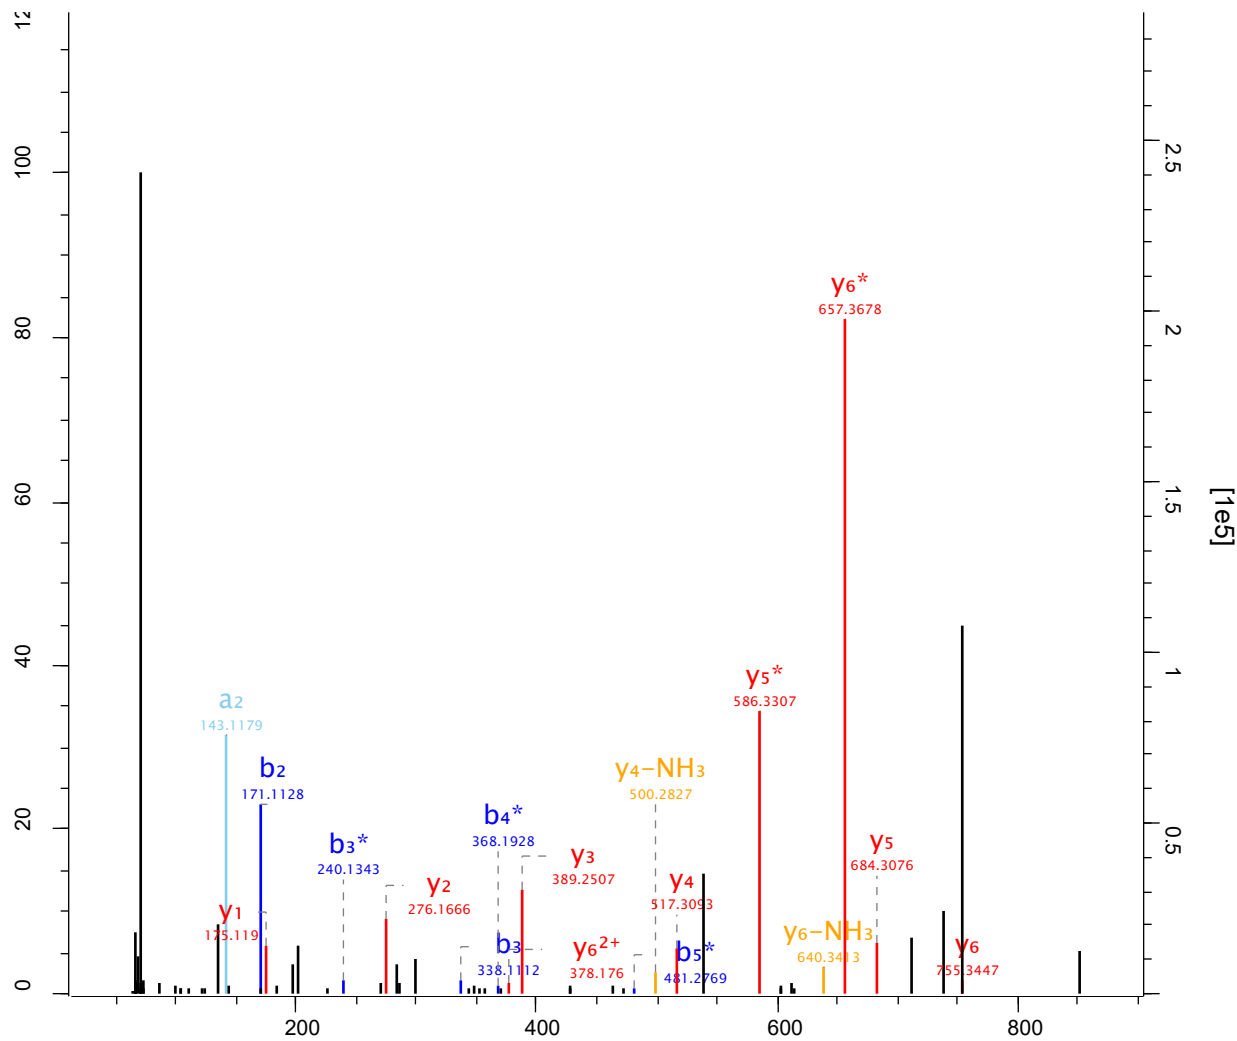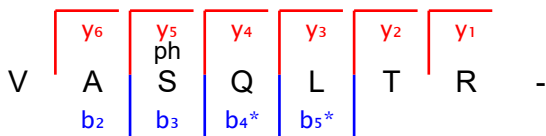

Raw file Scan Method Score m/z  
 sys\_05\_1 7348 FTMS; HCD 64.1 440.88

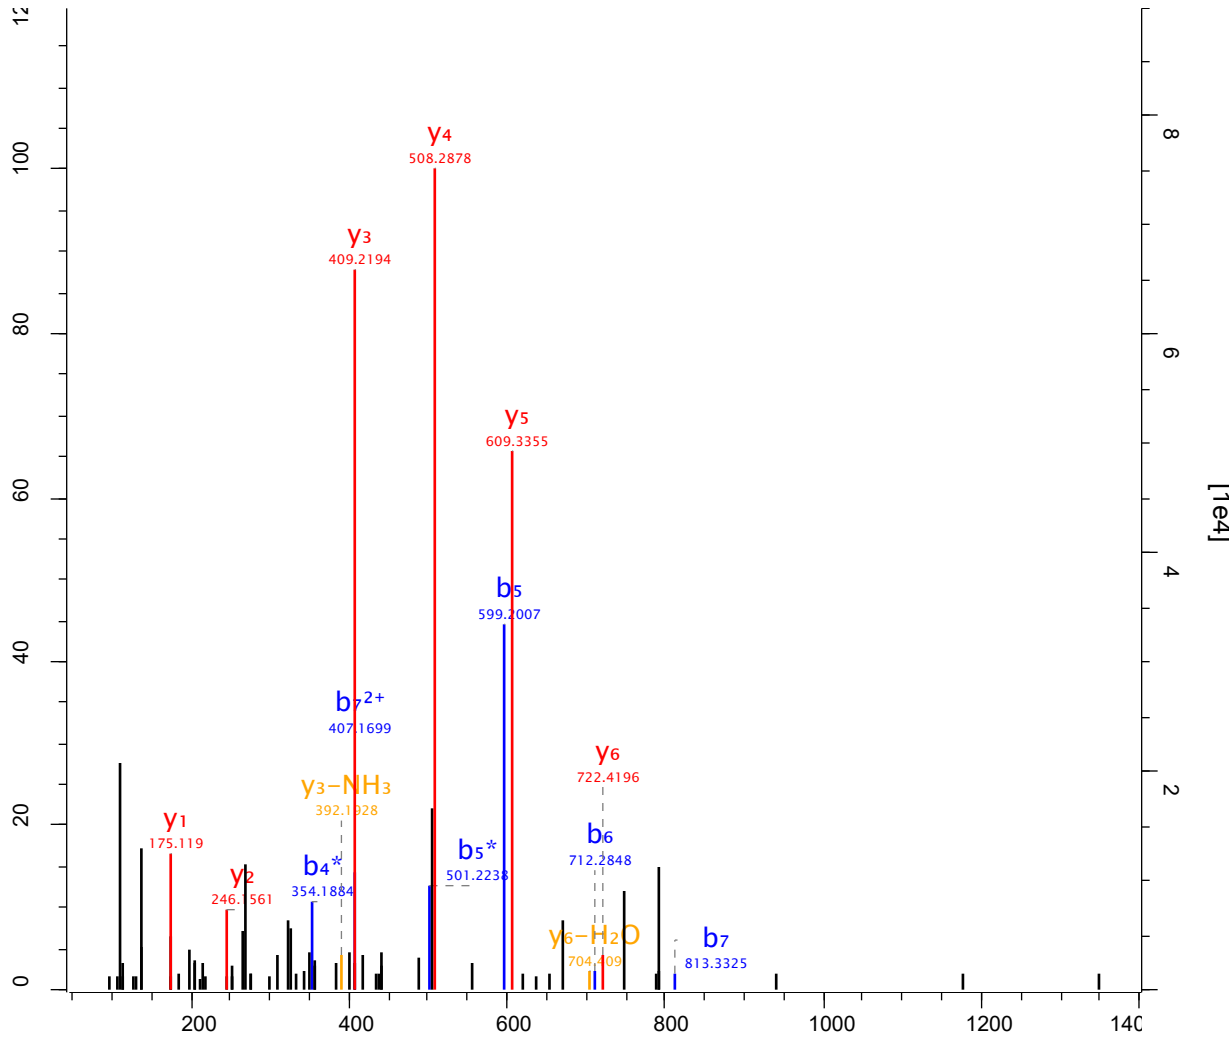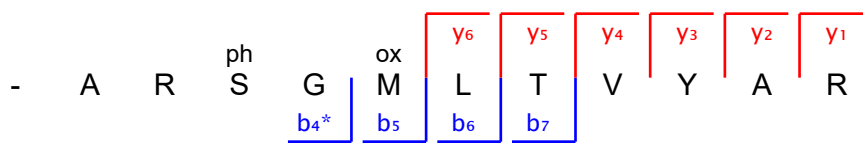



Raw file Scan Method Score m/z  
 sys\_05\_1 8039 FTMS; HCD 174.44 633.74

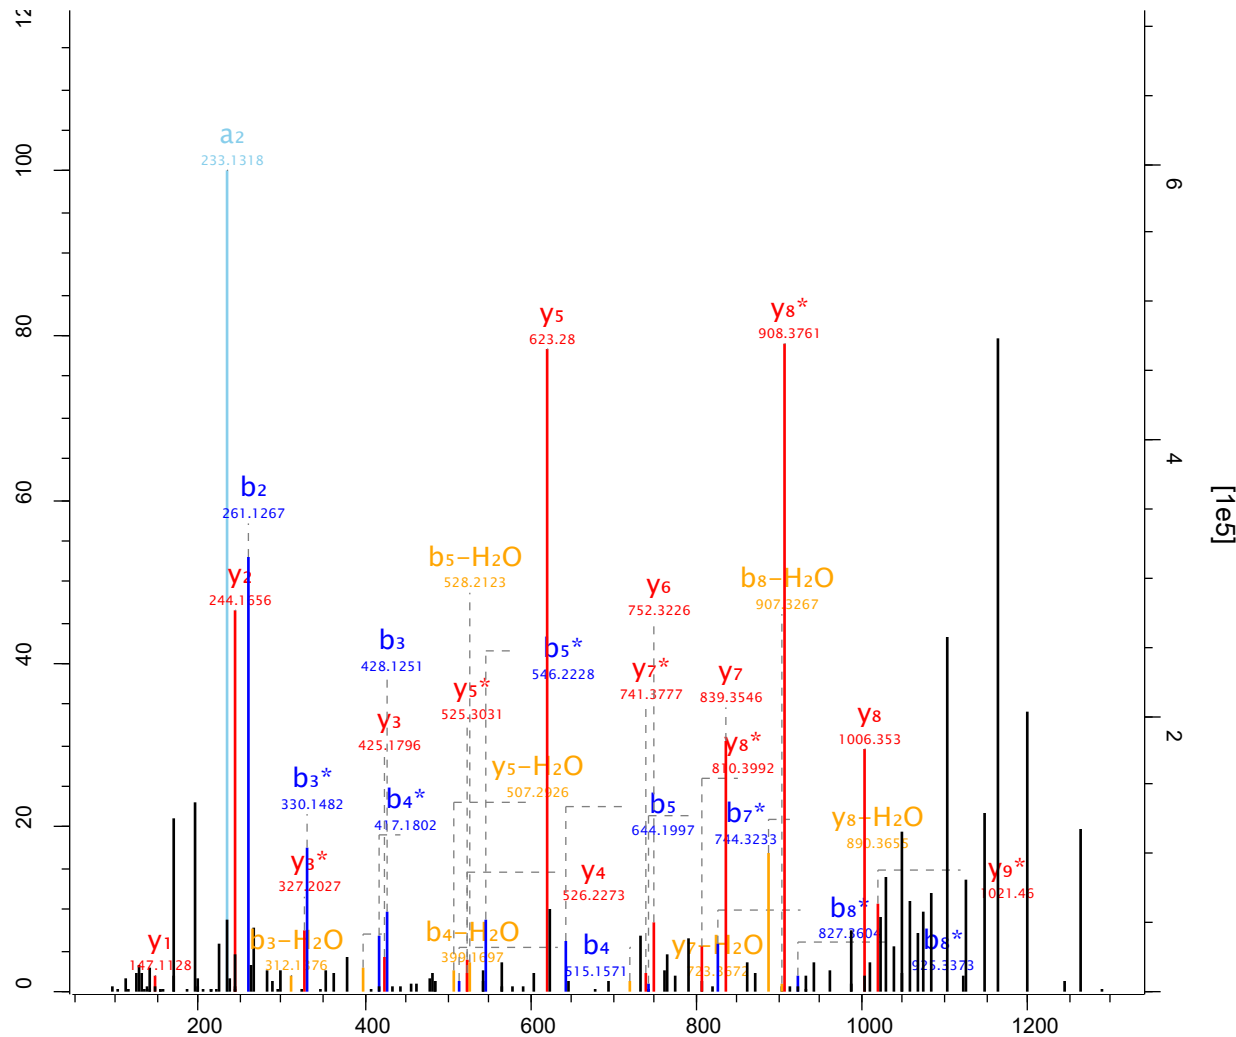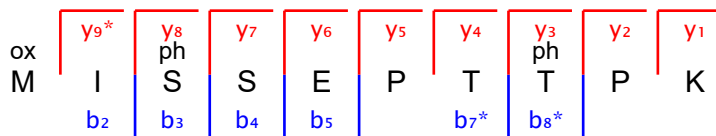

Raw file Scan Method Score m/z  
 sys\_05\_2 10087 FTMS; HCD 74.99 556.75

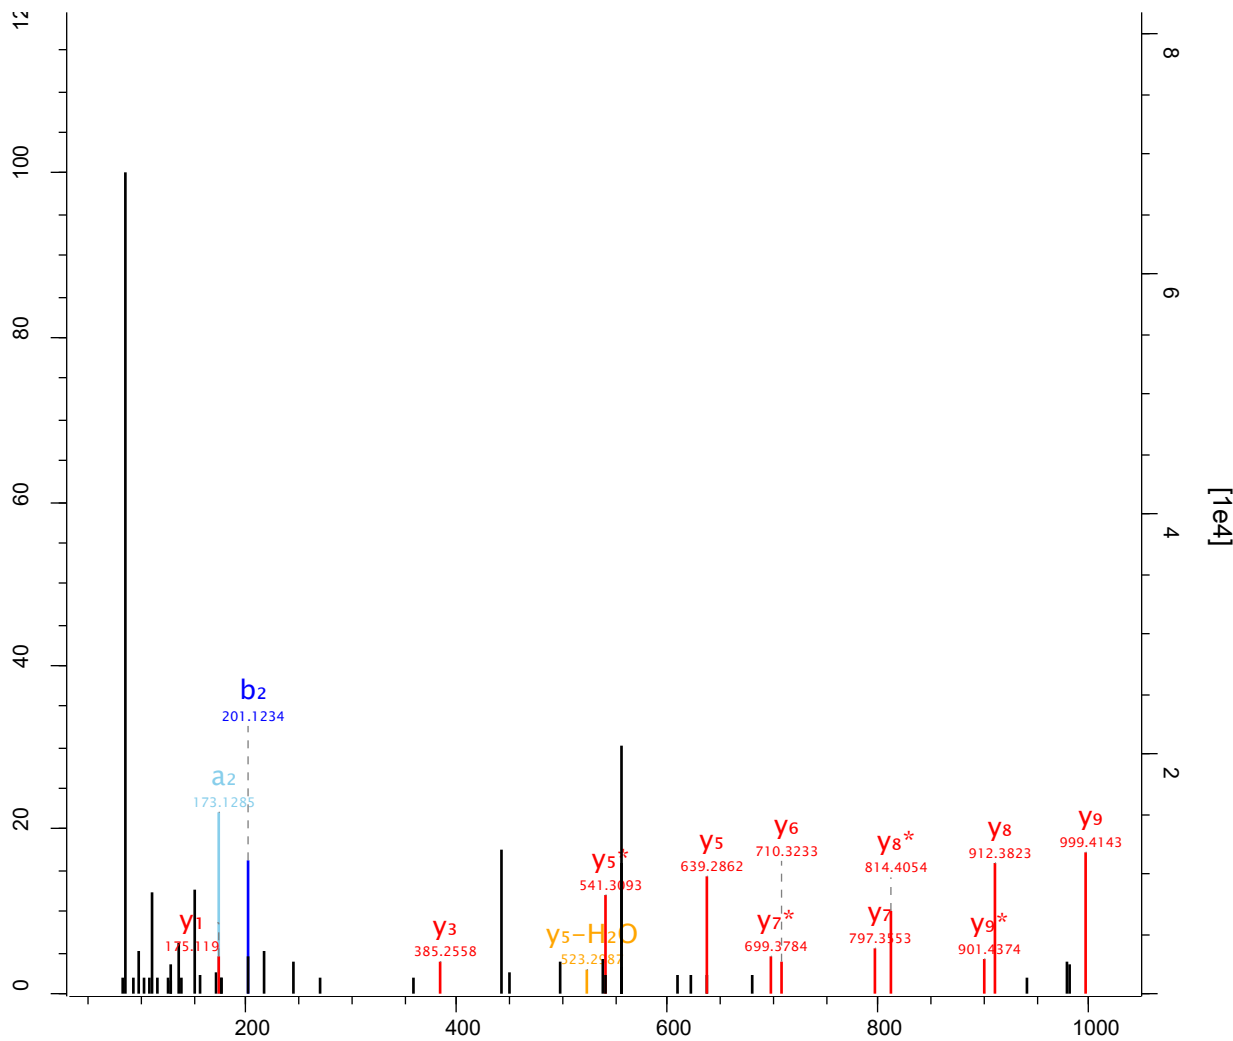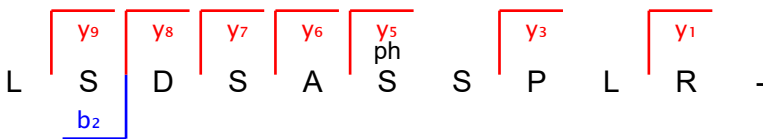

Raw file Scan Method Score m/z  
 sys\_05\_2 10115 FTMS; HCD 114.97 428.7

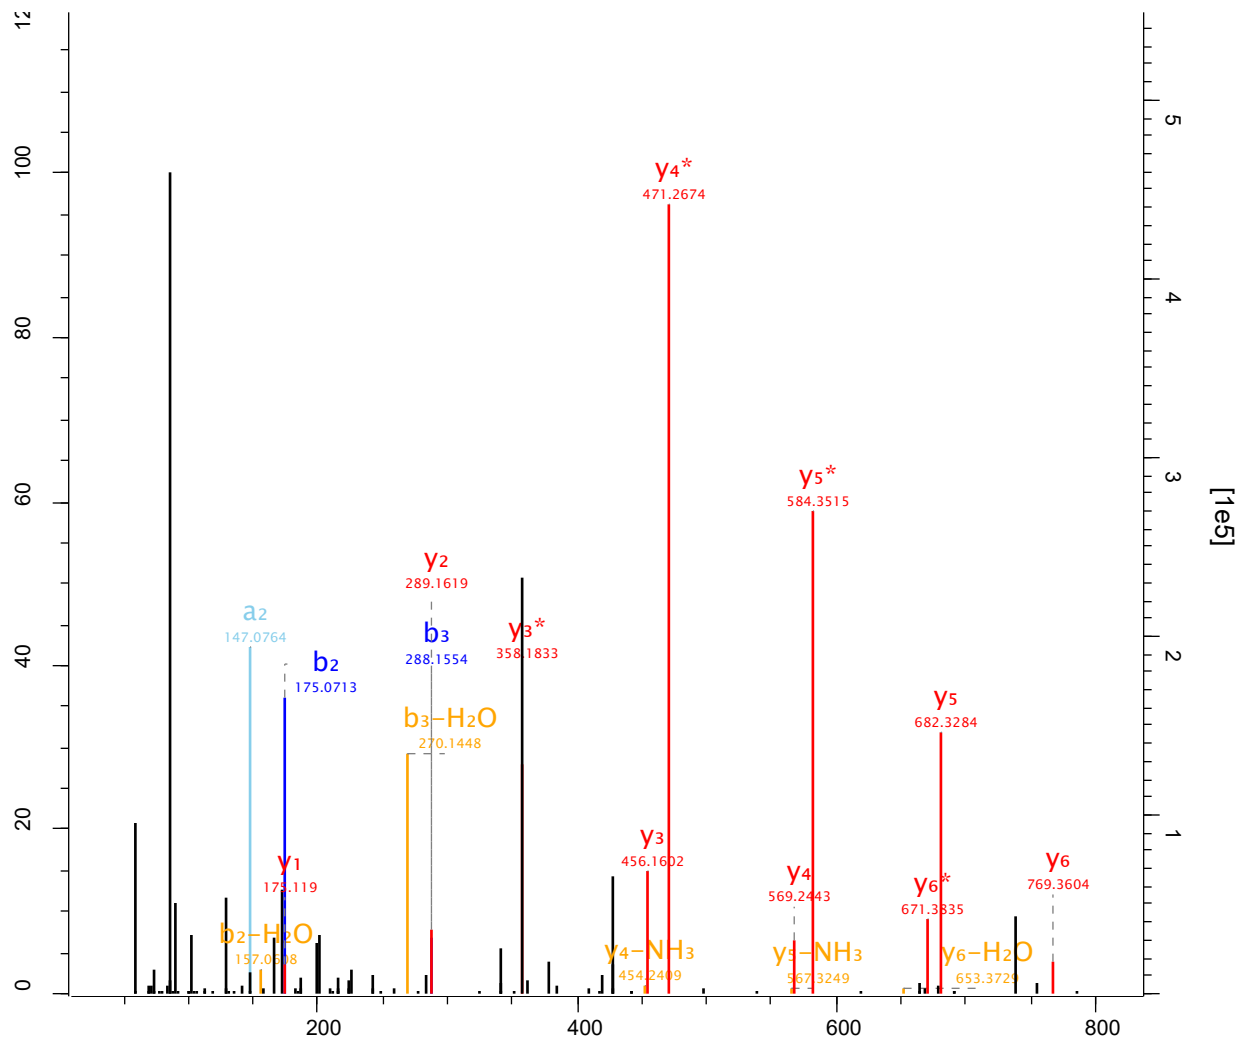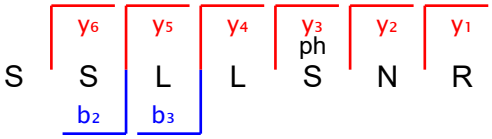

Raw file Scan Method Score m/z  
 sys\_05\_2 10137 FTMS; HCD 81.57 628.27

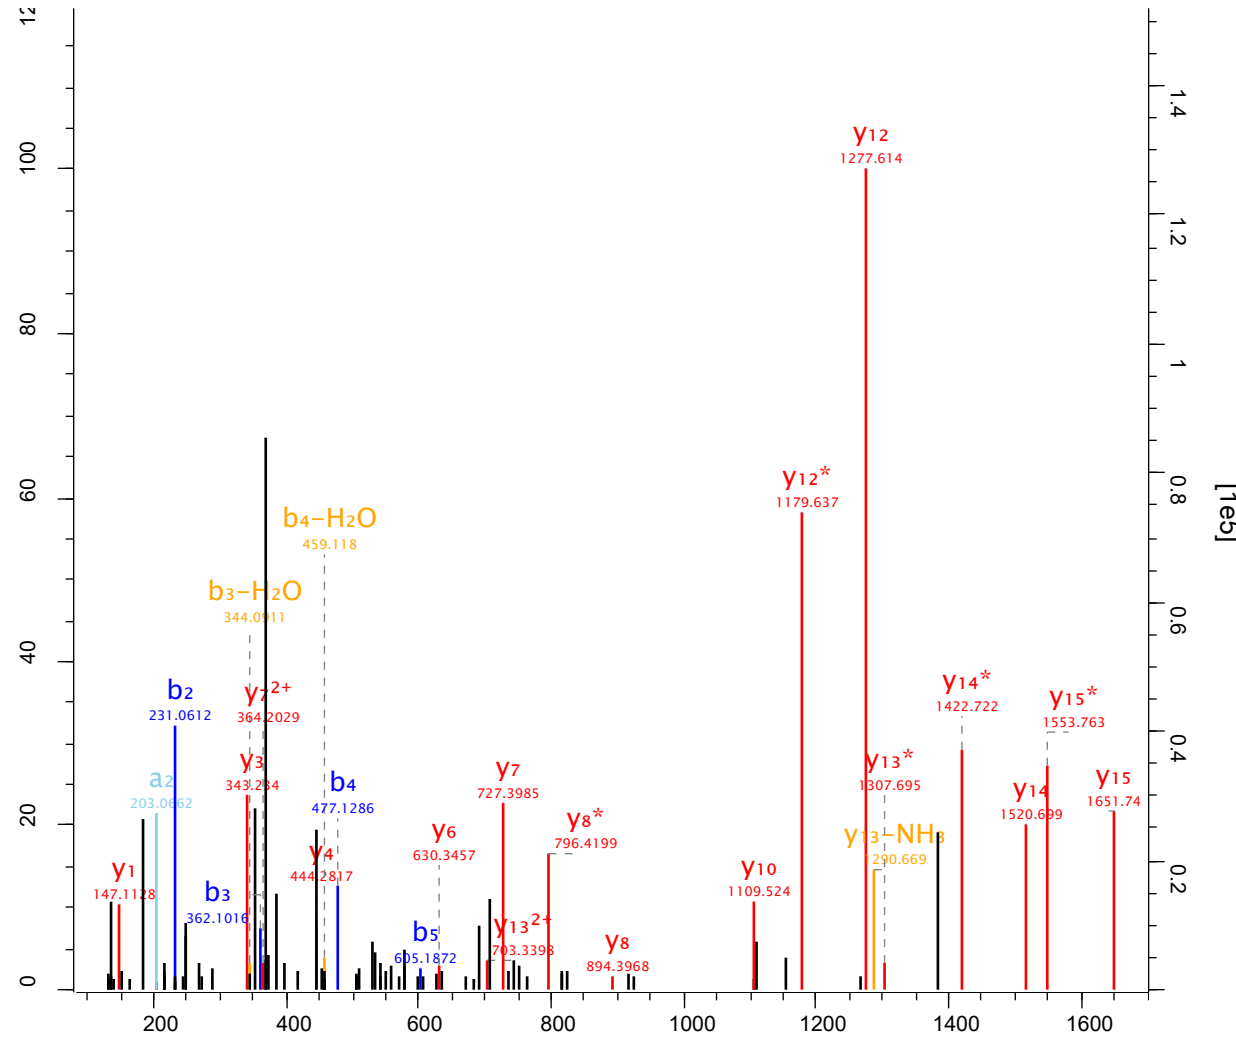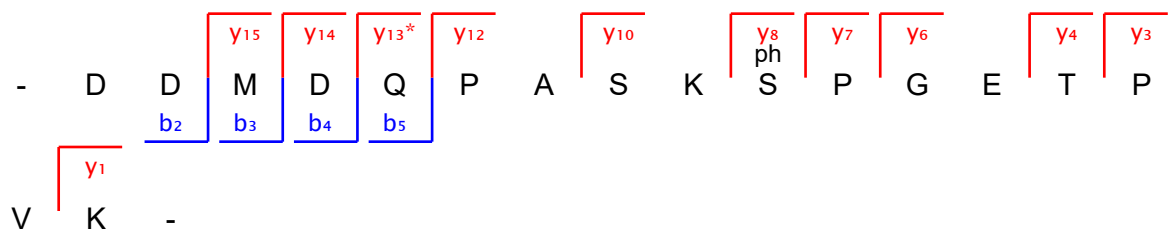

Raw file Scan Method Score m/z  
 sys\_05\_2 10424 FTMS; HCD 96.11 427.72

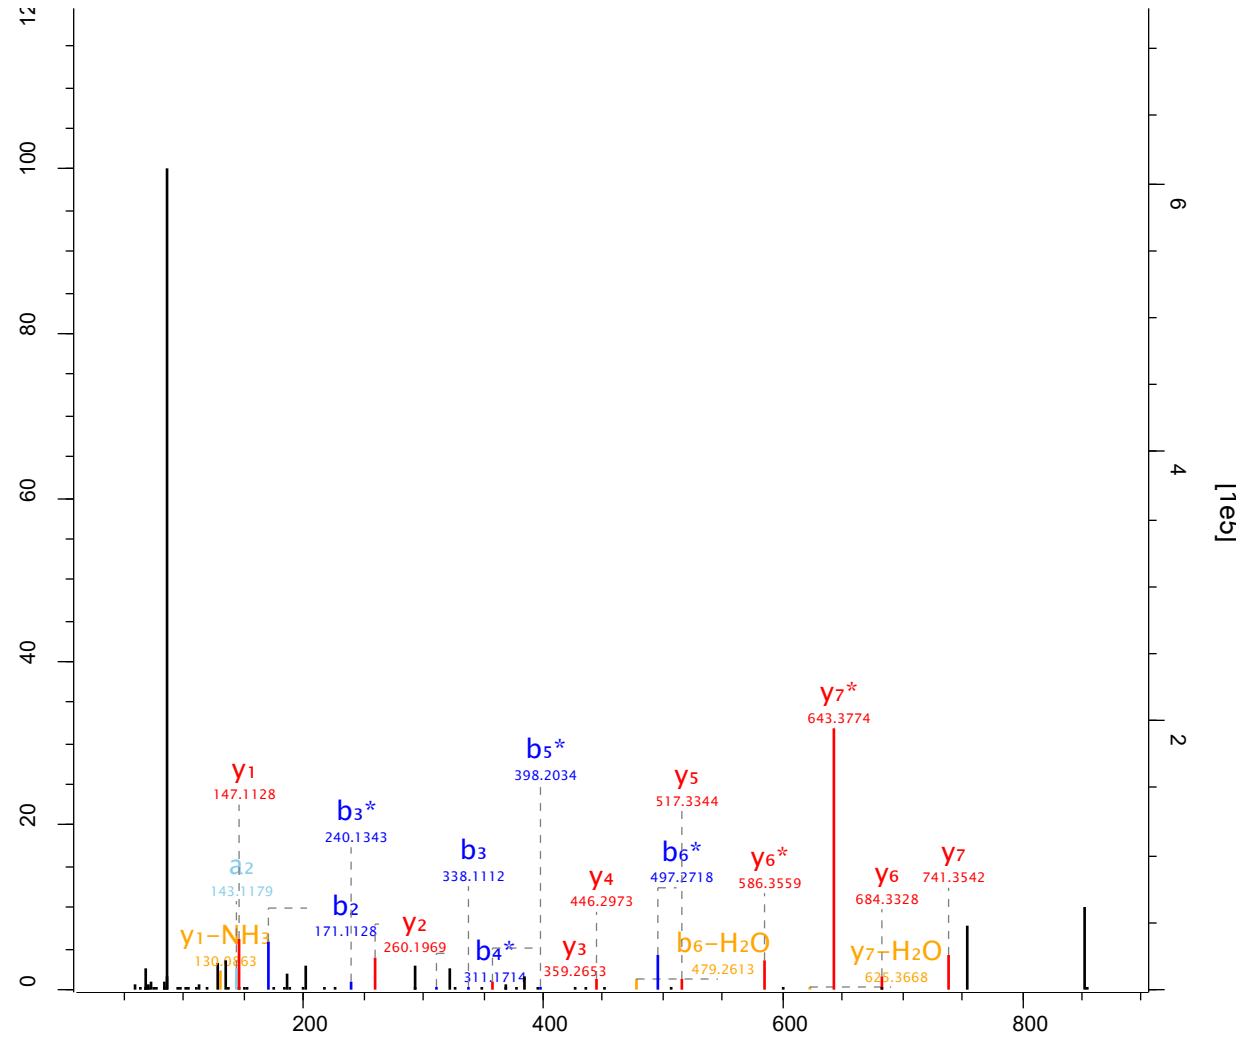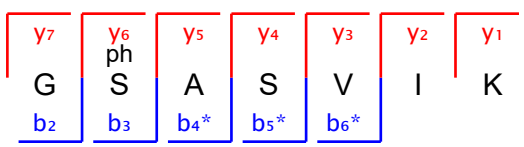

Raw file Scan Method Score m/z  
 sys\_05\_2 10455 FTMS; HCD 189.33 671.79

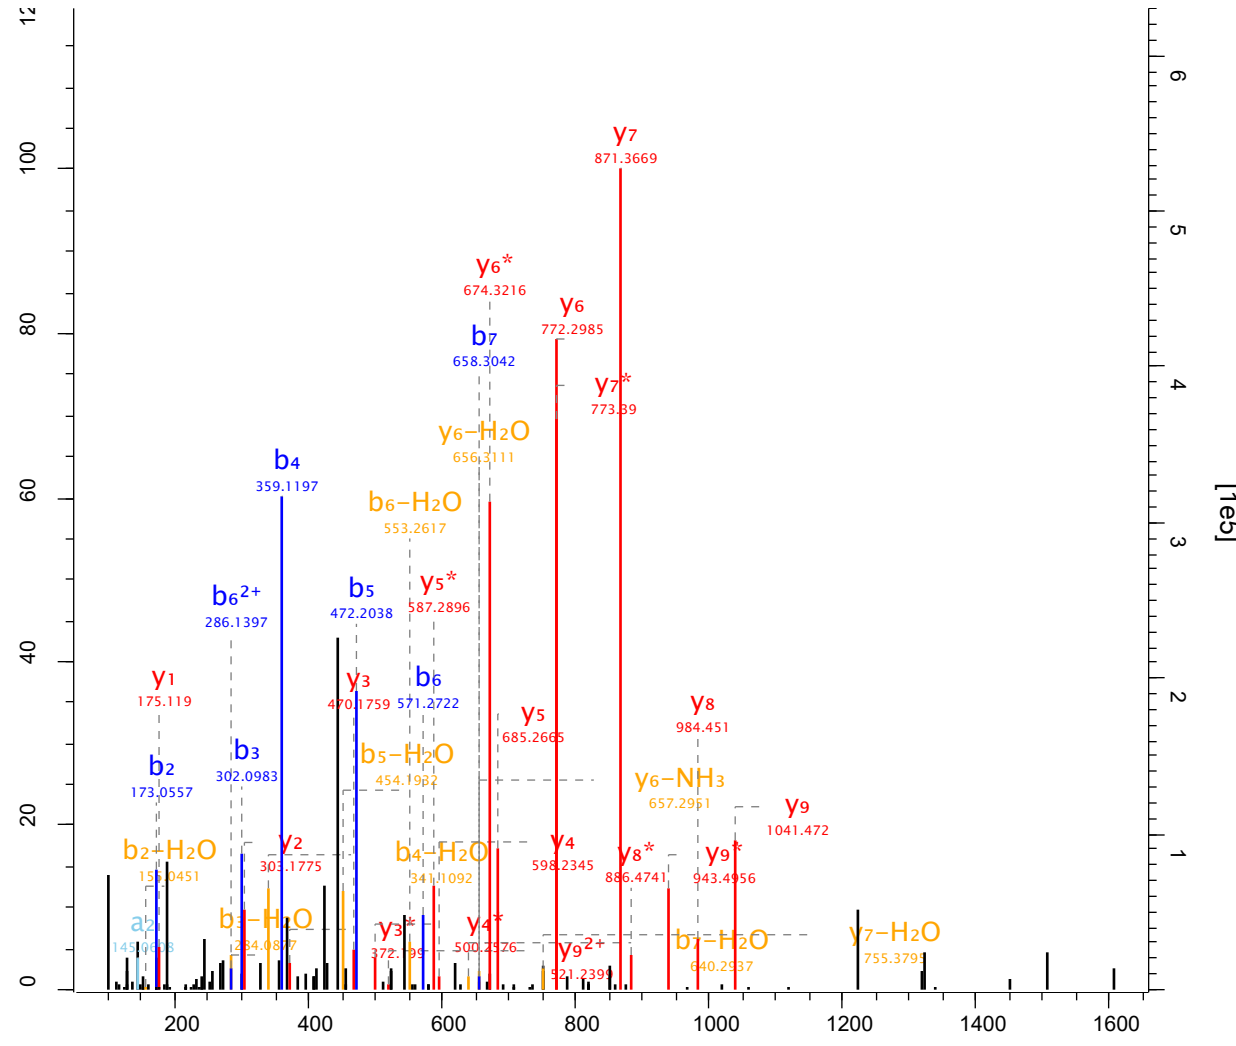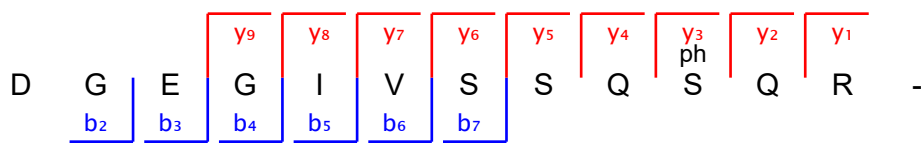

Supplement: 143488_2_supp_334106_ps5hgj.pdf [file 143488_2_supp_334106_ps5hgj.pdf]
