# Supplementary material for: The Systemin Signaling Cascade As Derived from Time Course Analyses of the Systemin-responsive Phosphoproteome
Source: PubMed Central journal article supplement (PMC6683004; doi:10.1074/mcp.ra119.001367), 2019-05-28

**Supplementary Figure 2:** Representative annotated spectra of identified phosphopeptides under systemin,A17 and water treatment as exported from MaxQuant.

Raw file Scan Method Score m/z  
 sys\_15\_1 24677 FTMS; HCD 46.42 743.68

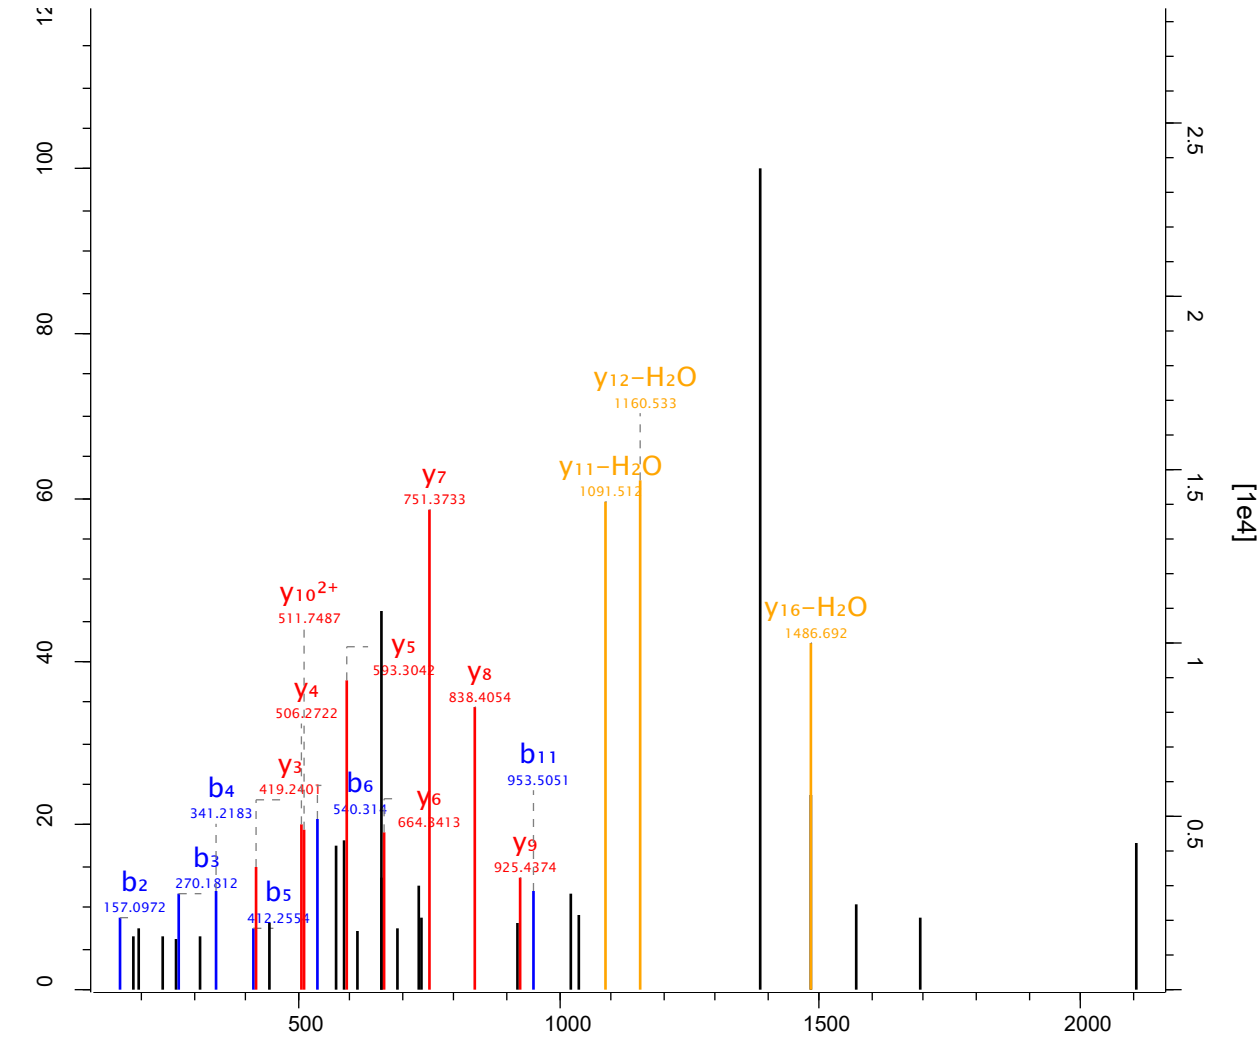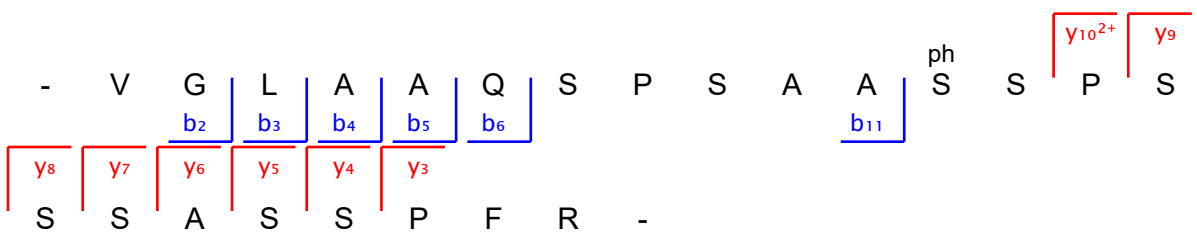

Raw file Scan Method Score m/z  
 sys\_15\_1 24740 FTMS; HCD 116.08 832.02

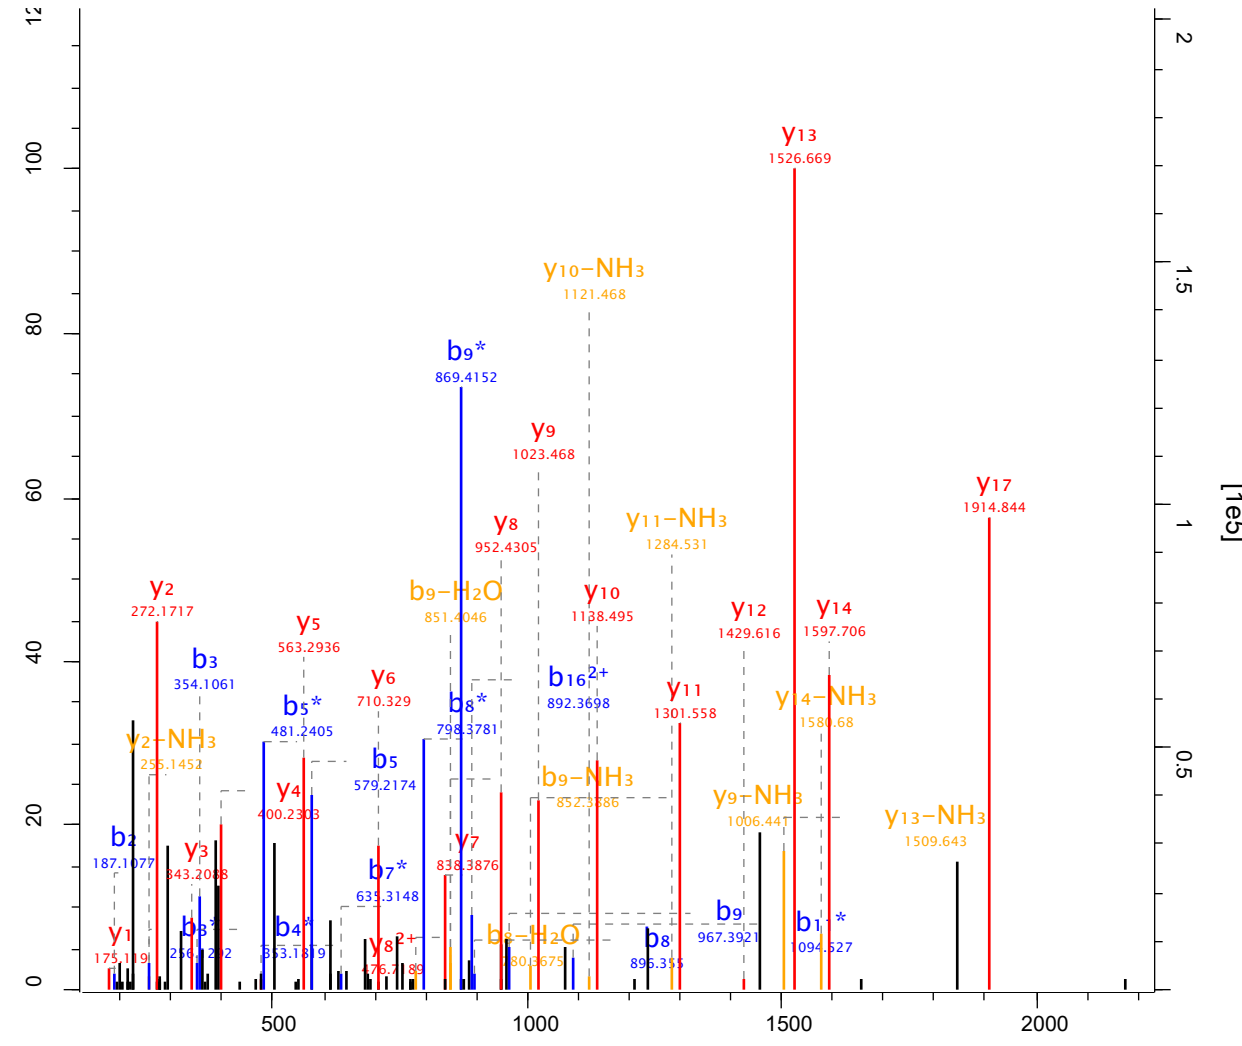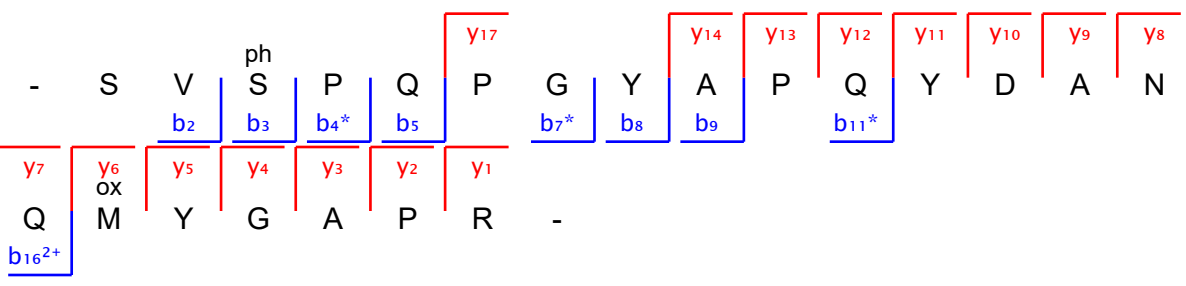

Raw file Scan Method Score m/z  
 sys\_15\_1 24741 FTMS; HCD 99.09 895.88

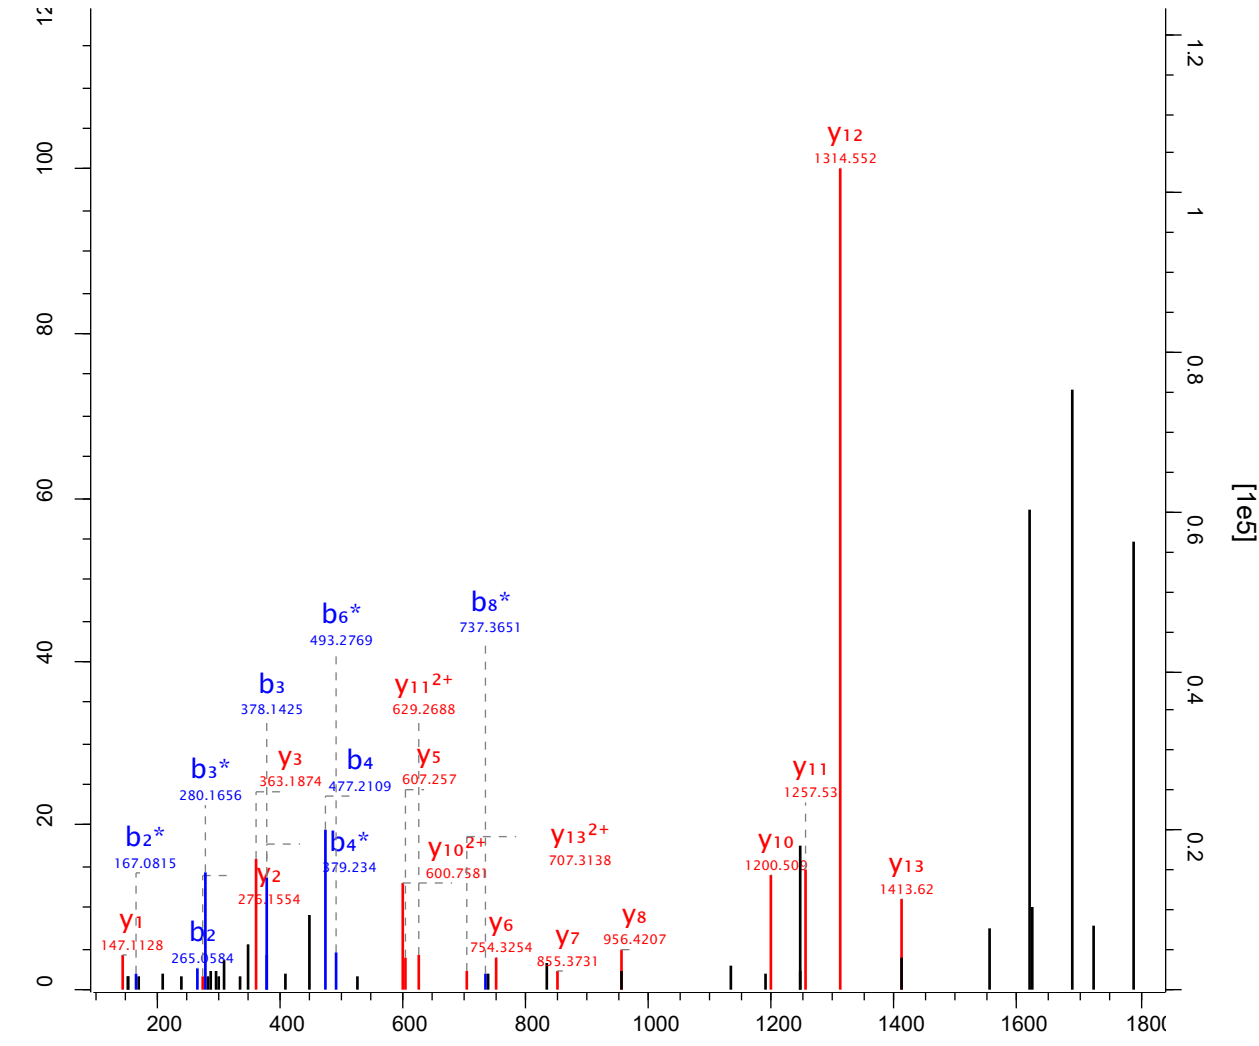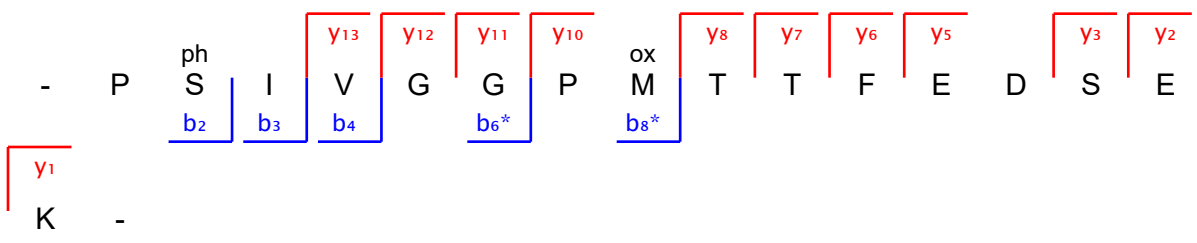



Raw file Scan Method Score m/z  
 sys\_15\_1 24756 FTMS; HCD 73.29 550.61

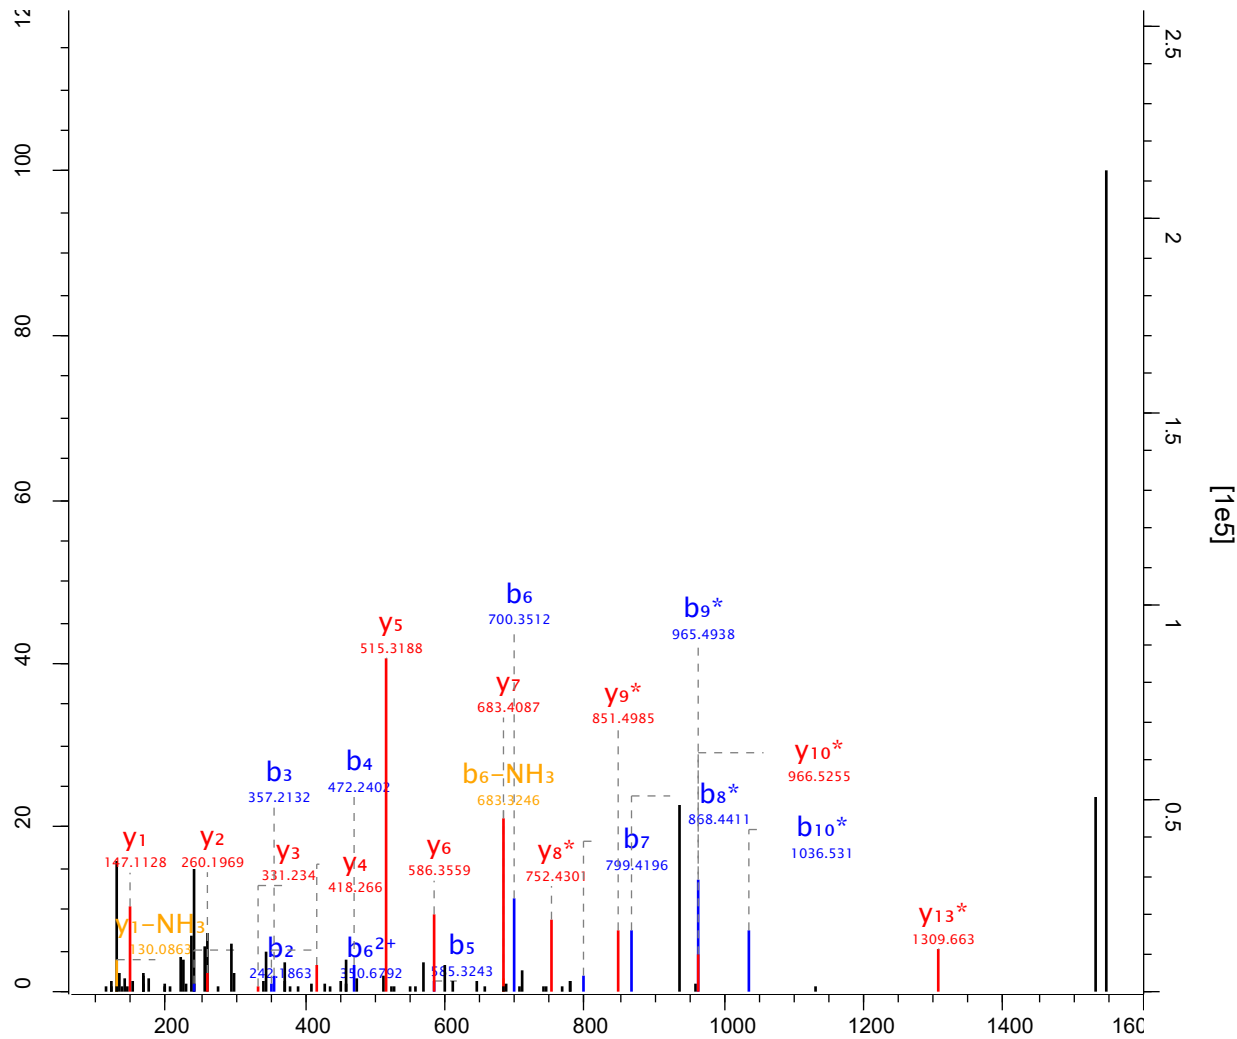

- K L D D L D V S P A P S A L K

b<sub>2</sub>
b<sub>3</sub>
b<sub>4</sub>
b<sub>5</sub>
b<sub>6</sub>
b<sub>7</sub>
b<sub>8</sub>\*
b<sub>9</sub>\*
b<sub>10</sub>\*

y<sub>13</sub>\*
y<sub>10</sub>\*
y<sub>9</sub>\*
y<sub>8</sub>\*
y<sub>7</sub>
y<sub>6</sub>
y<sub>5</sub>
y<sub>4</sub>
y<sub>3</sub>
y<sub>2</sub>
y<sub>1</sub>

Raw file Scan Method Score m/z  
 sys\_15\_1 24885 FTMS; HCD 66.89 875.39

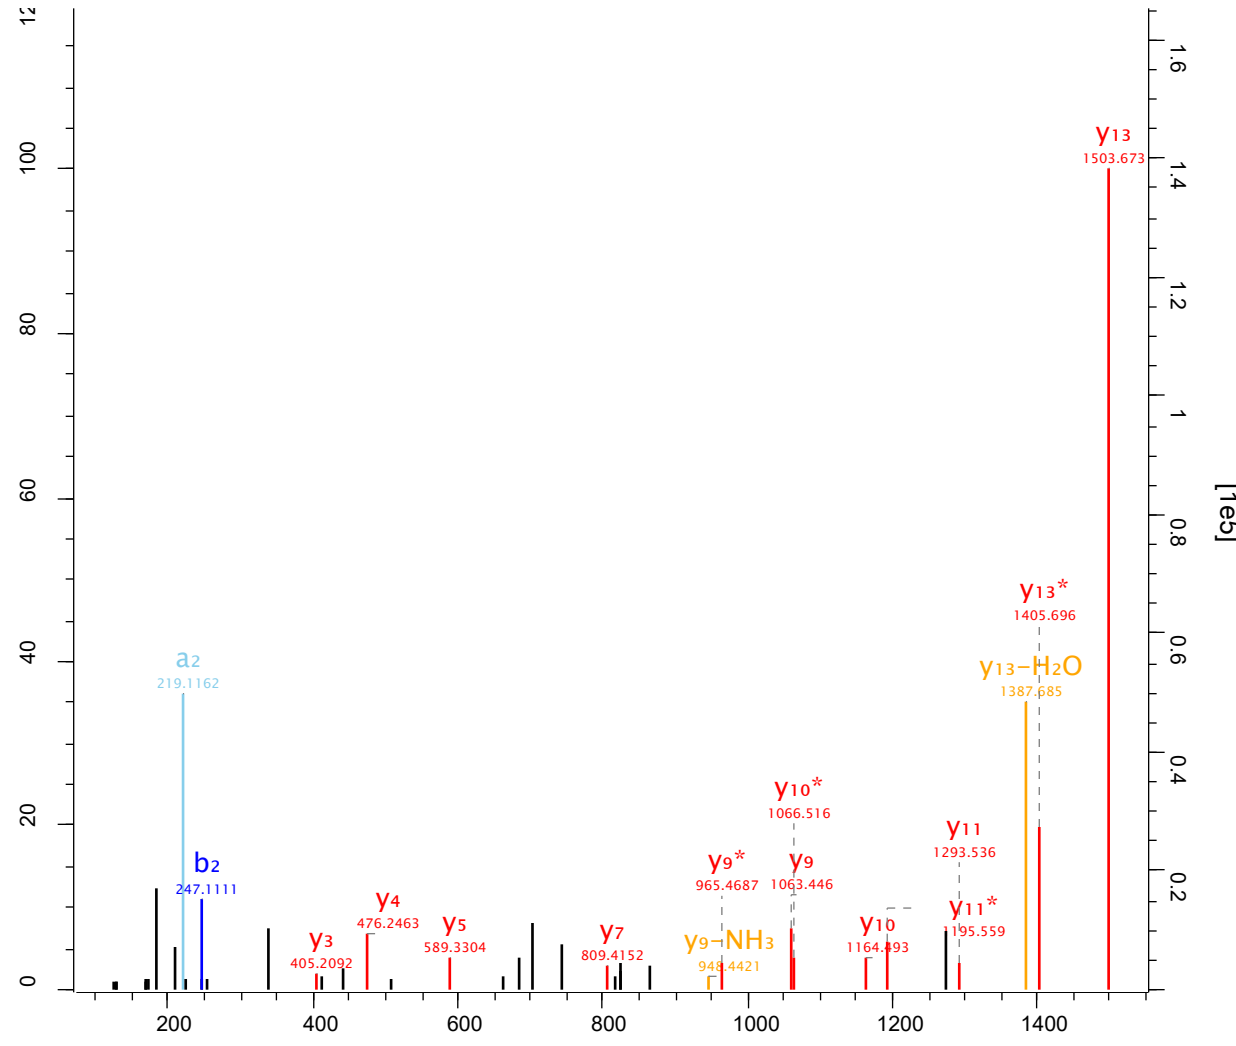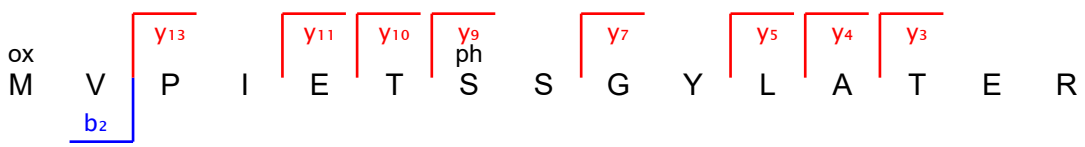

Raw file Scan Method Score m/z  
 sys\_15\_1 24947 FTMS; HCD 100.11 696.28

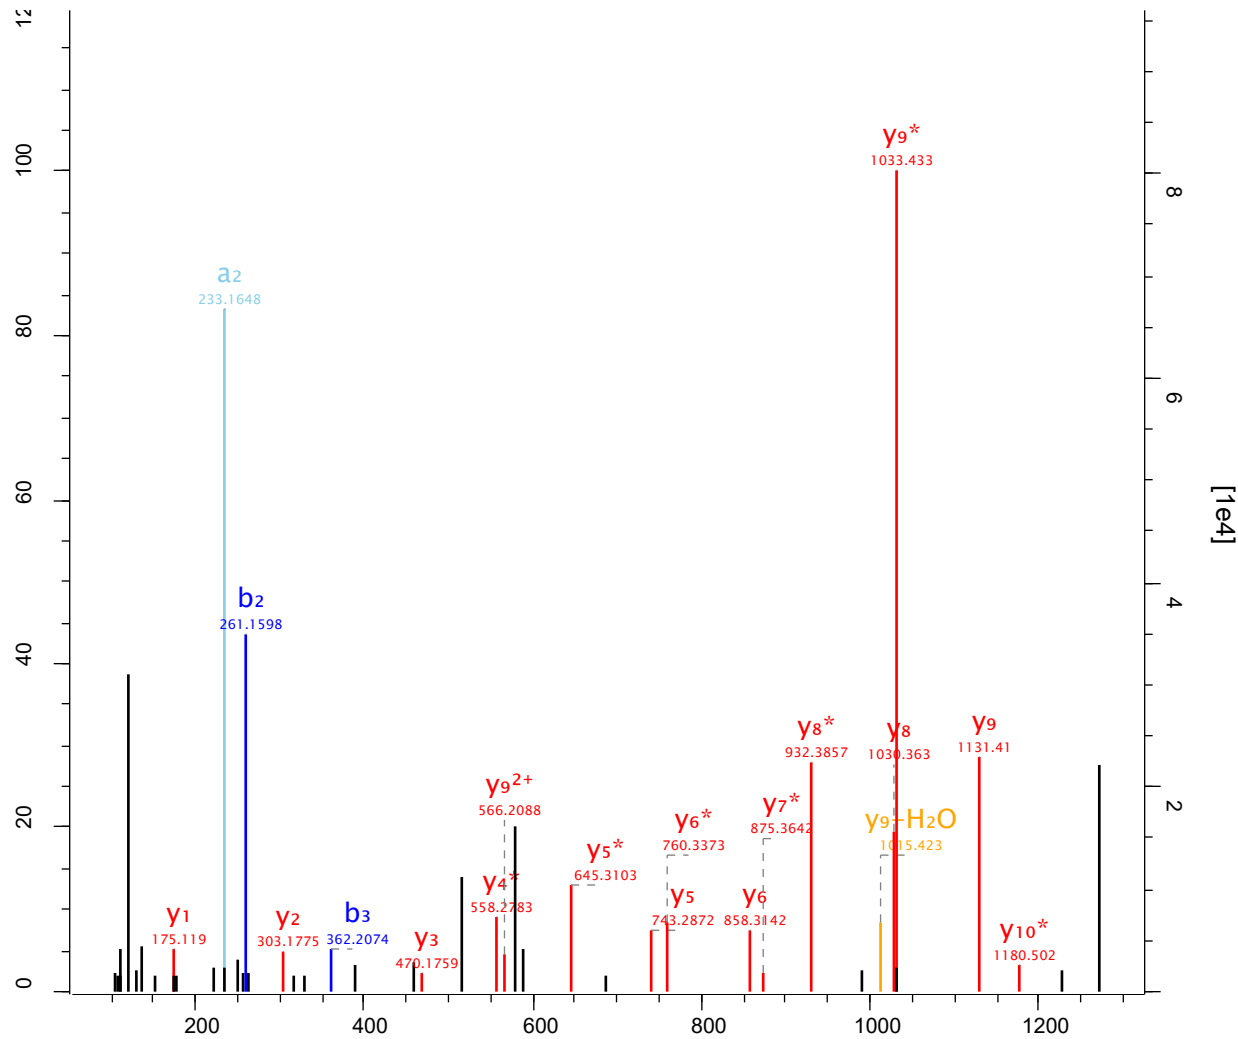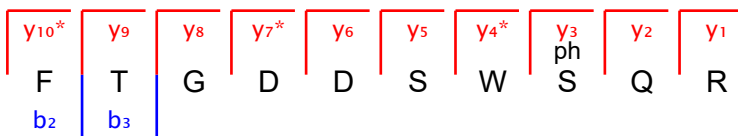

Raw file Scan Method Score m/z  
 sys\_15\_1 25000 FTMS; HCD 42.03 642.31

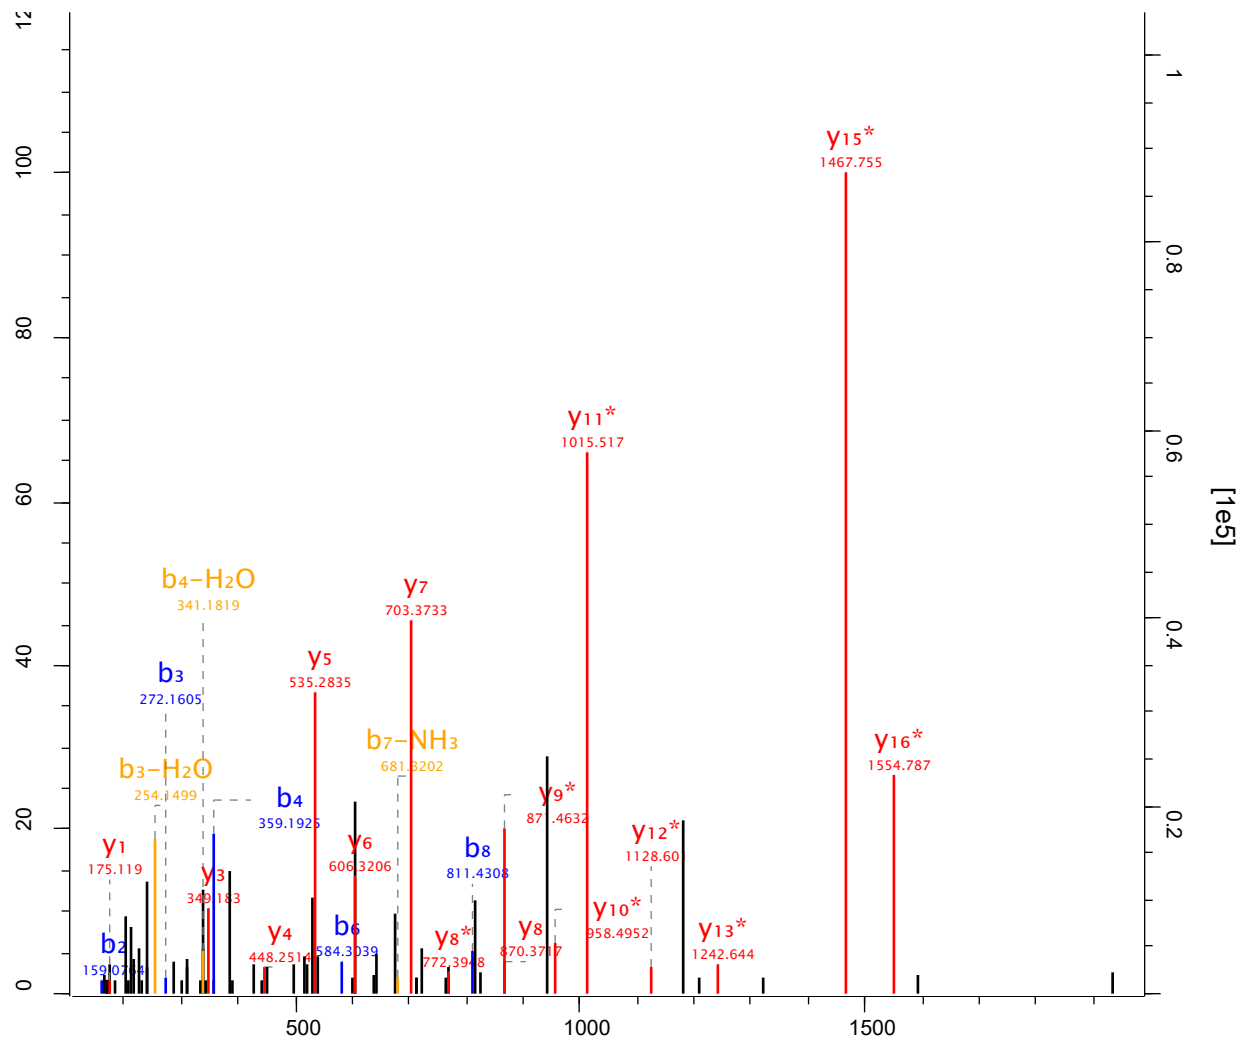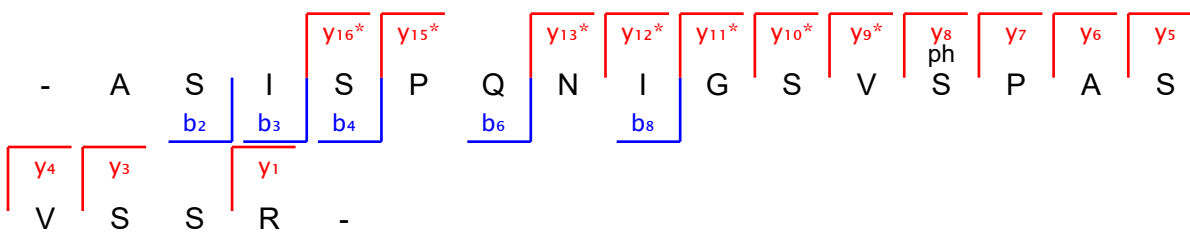

Raw file Scan Method Score m/z  
 sys\_15\_1 25112 FTMS; HCD 58.95 691.63

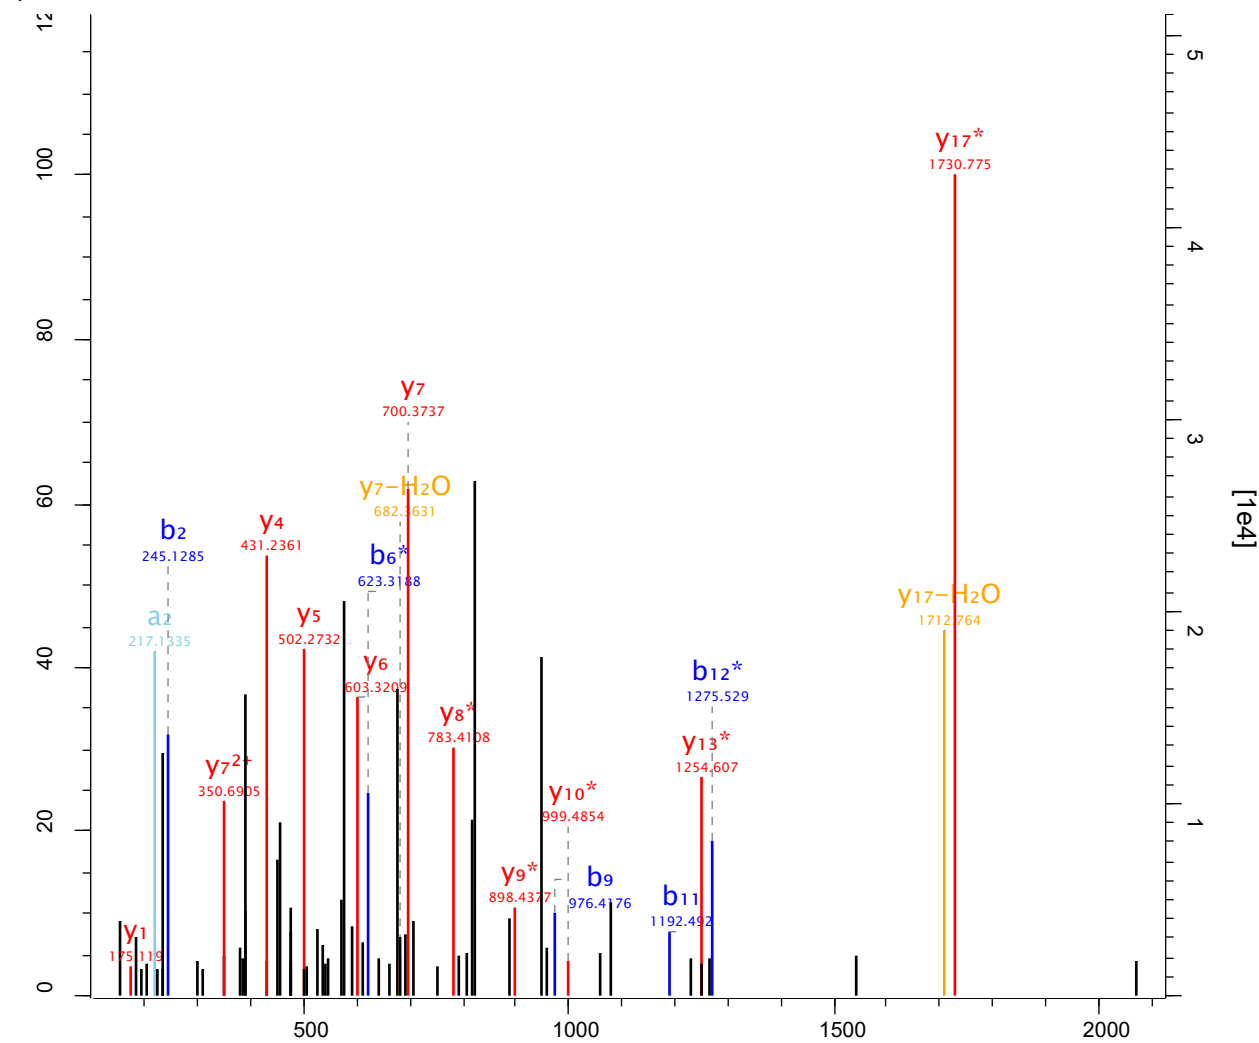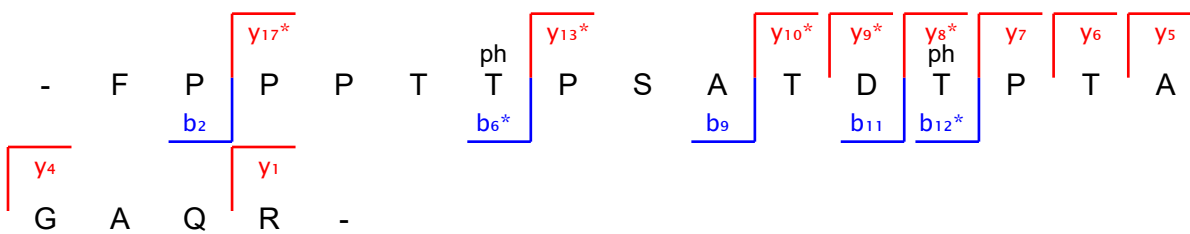

Raw file Scan Method Score m/z  
 sys\_15\_1 25171 FTMS; HCD 288.96 949.39

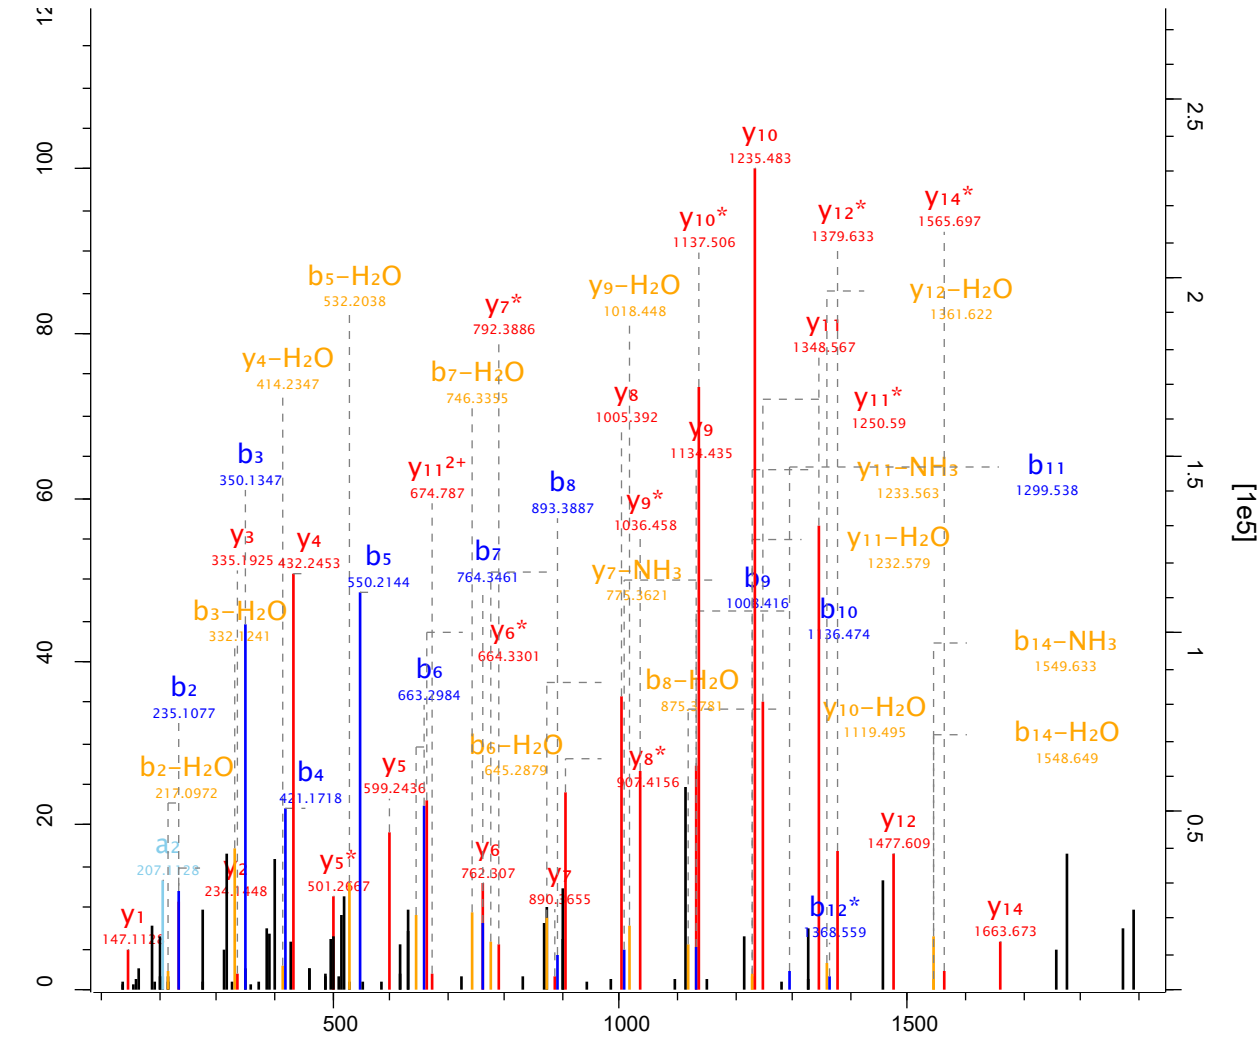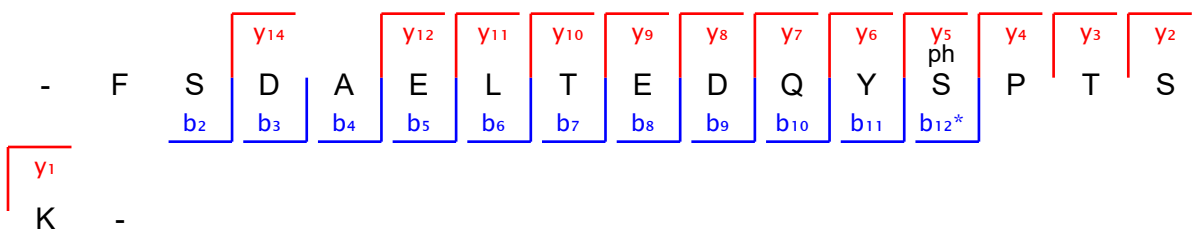

Raw file Scan Method Score m/z  
 sys\_15\_1 25239 FTMS; HCD 159.18 643.81

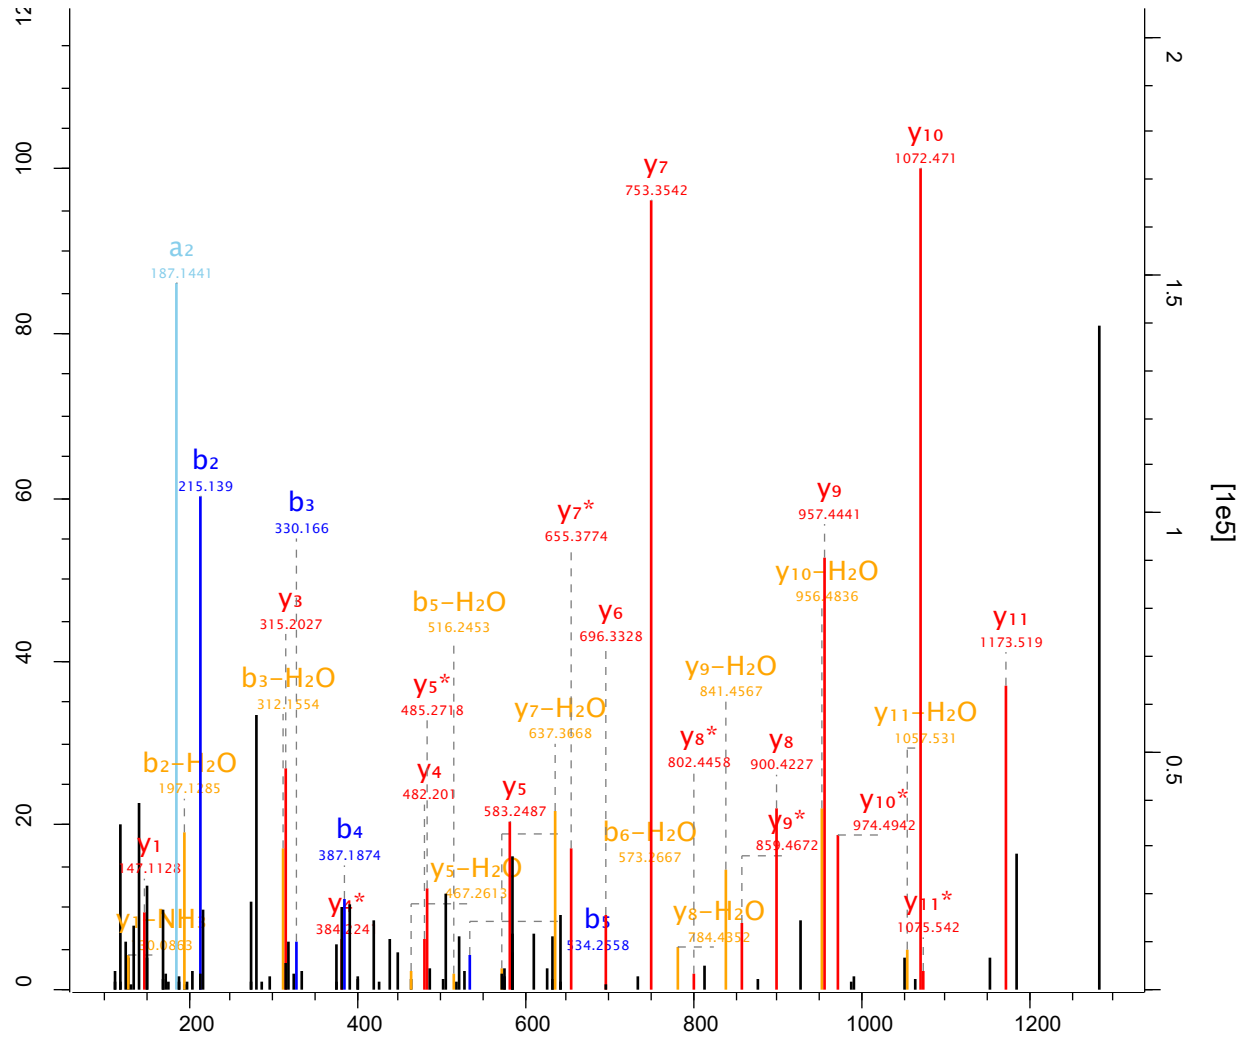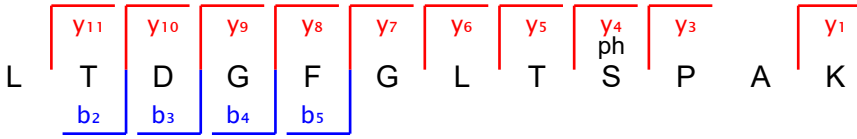

Raw file Scan Method Score m/z  
 sys\_15\_1 25246 FTMS; HCD 106.93 748.84

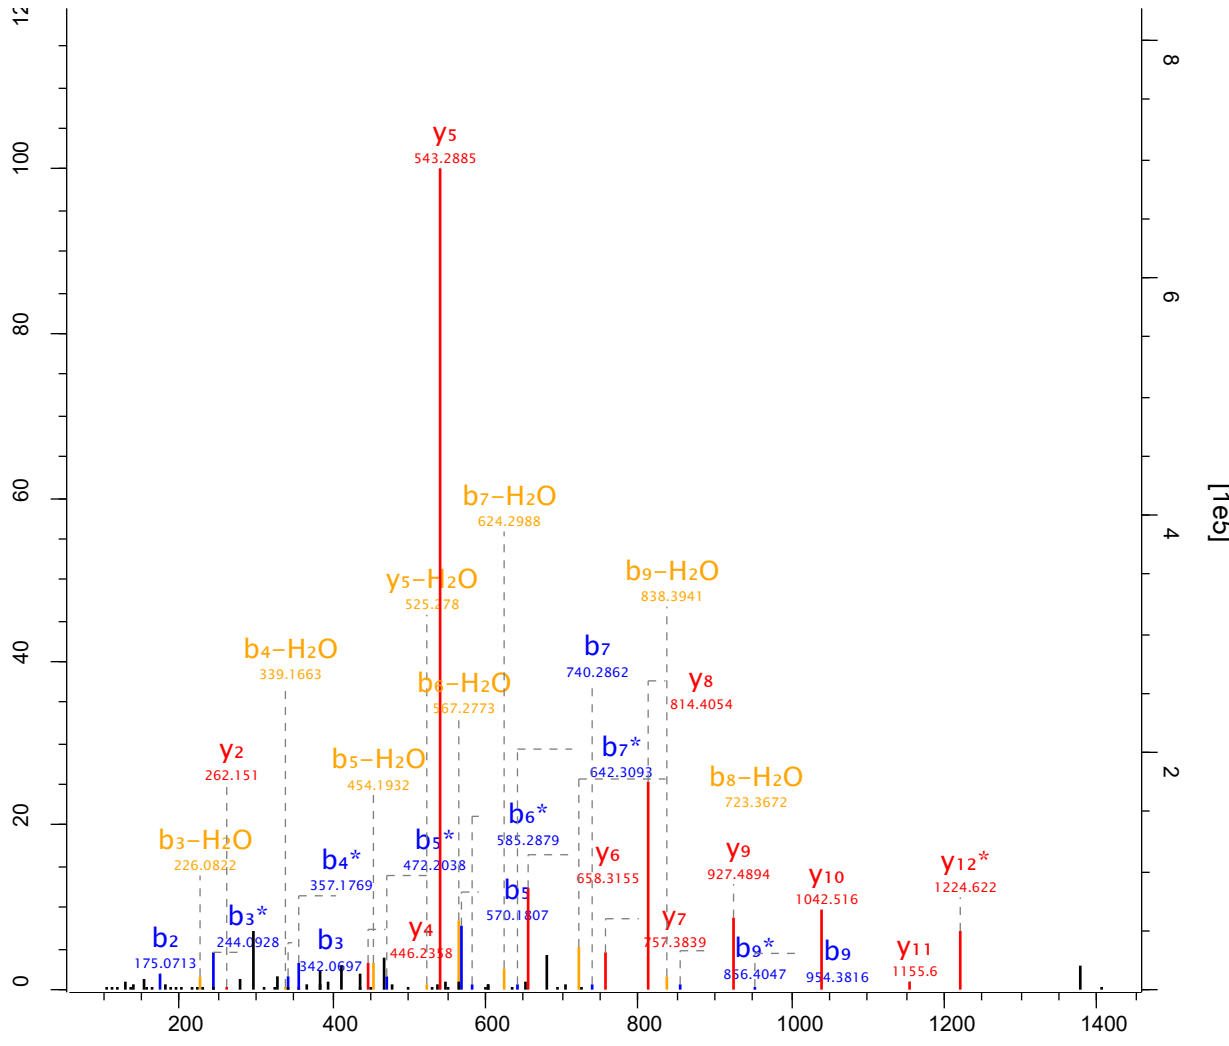

- S S S ph y12\* S L y11 D y10 L y9 G y8 V y7 D y6 P y5 P y4 S S y2 R -

b<sub>2</sub>
b<sub>3</sub>
b<sub>4</sub><sup>\*</sup>
b<sub>5</sub>
b<sub>6</sub><sup>\*</sup>
b<sub>7</sub>
b<sub>9</sub>



Raw file Scan Method Score m/z  
 sys\_15\_1 25285 FTMS; HCD 101.53 814.85

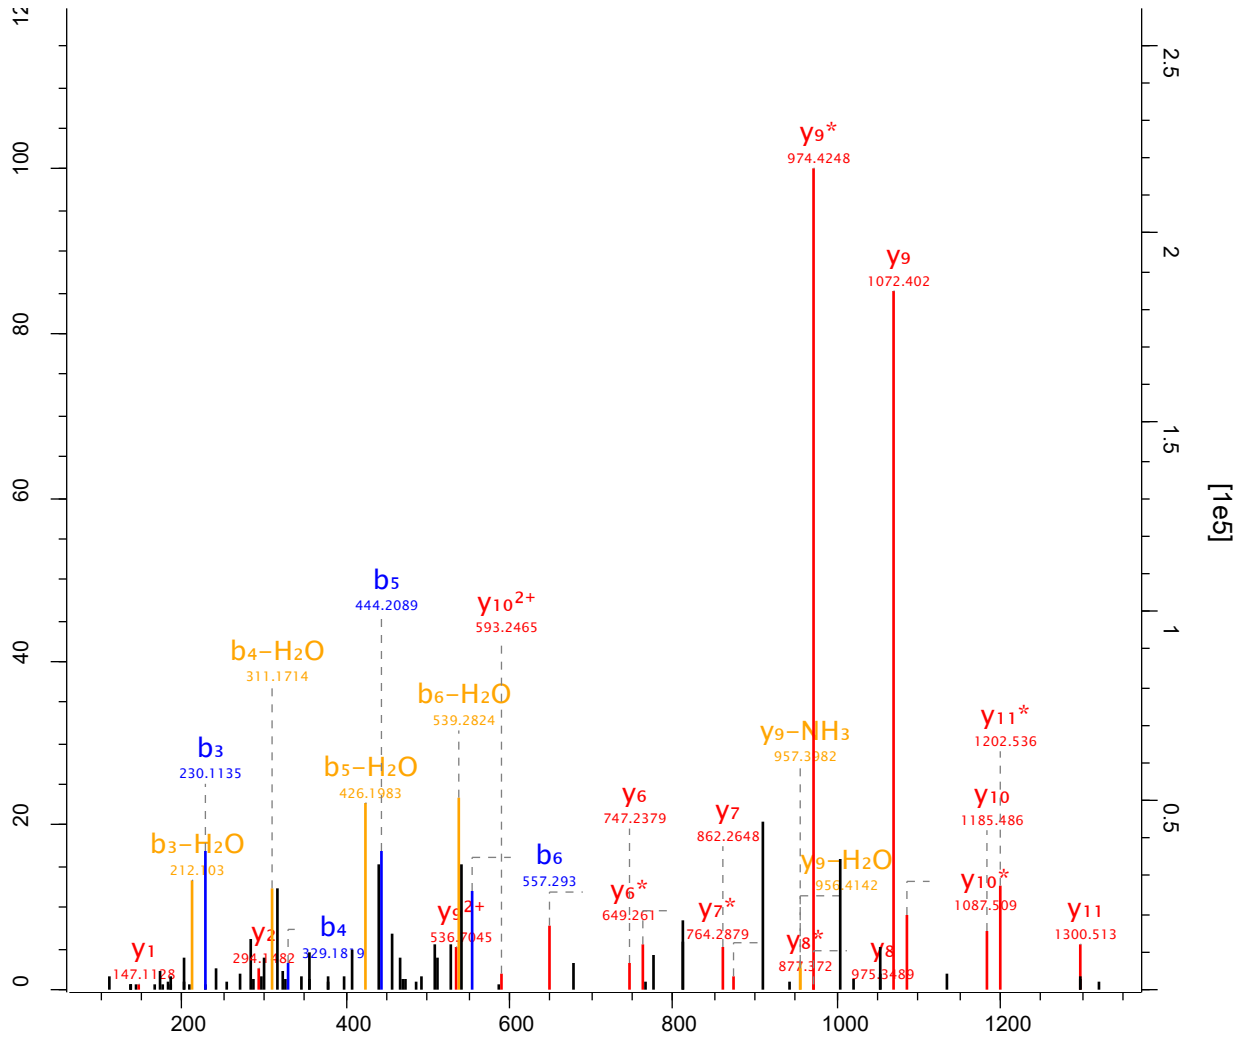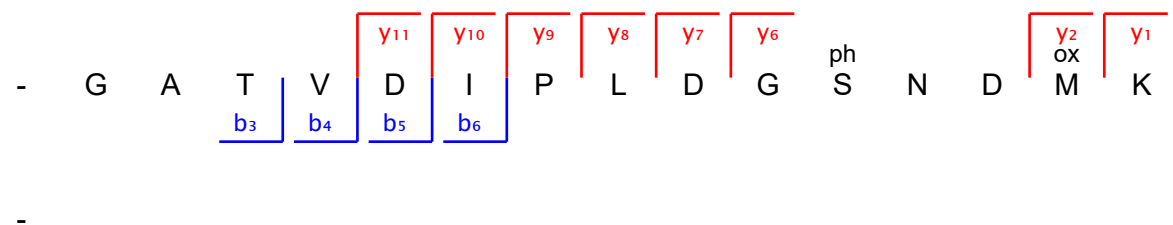

Raw file Scan Method Score m/z  
 sys\_15\_1 25499 FTMS; HCD 82.89 1159.97

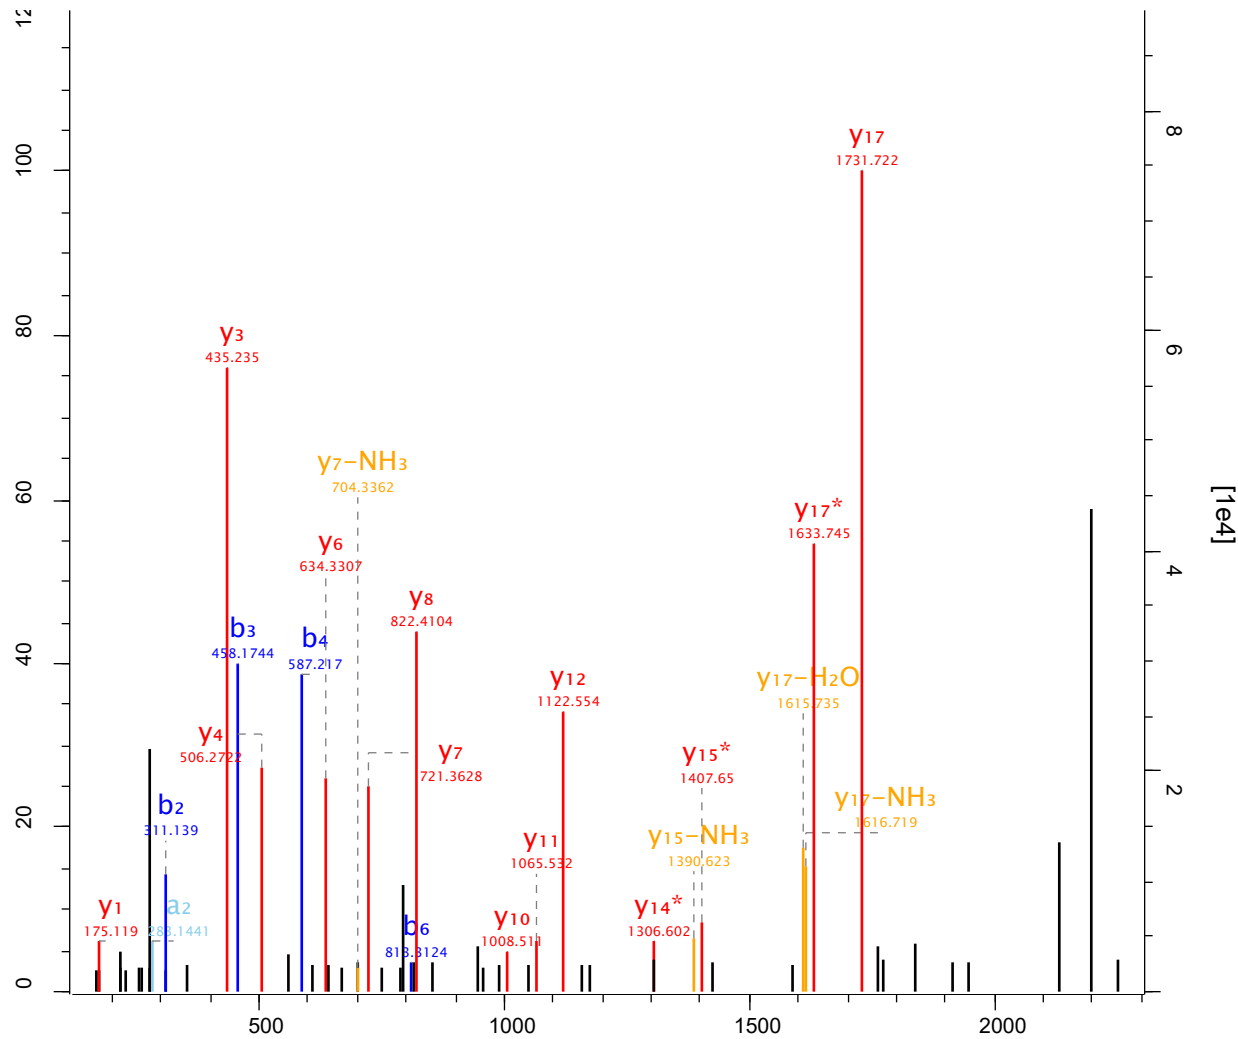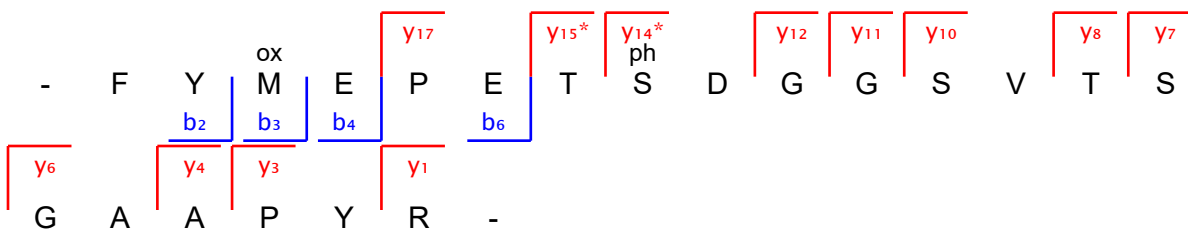

Raw file Scan Method Score m/z  
 sys\_15\_1 25504 FTMS; HCD 110.97 765.81

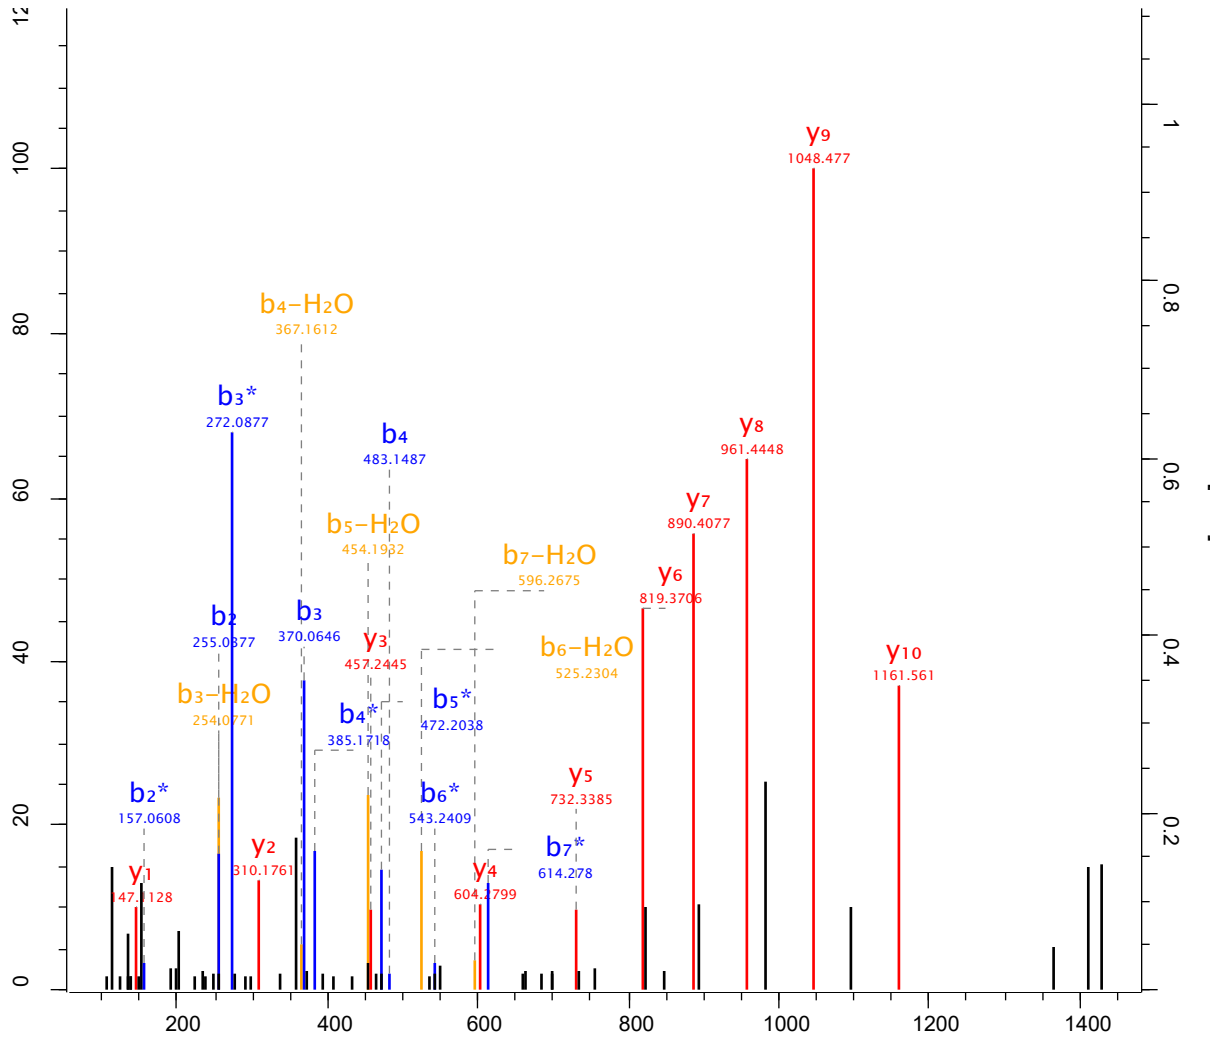

ph S S D L S A A S Q M F Y K -  
 b2 b3 b4 b5\* b6\* b7\* y10 y9 y8 y7 y6 y5 y4 OX y3 y2 y1

Raw file sys\_15\_1 Scan 25545 Method FTMS; HCD Score 190.86 m/z 937.4

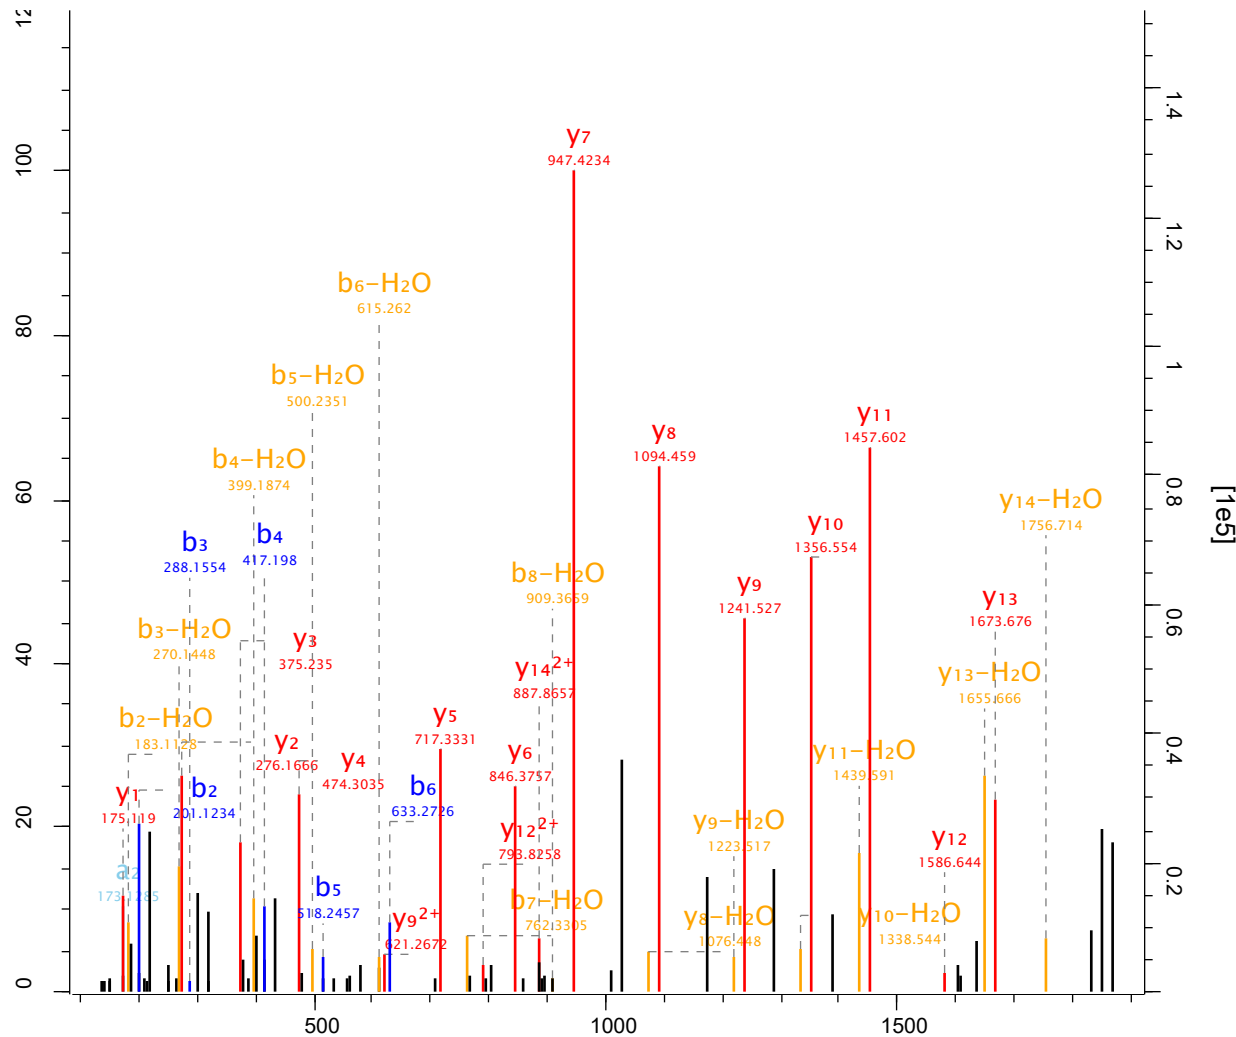

V T S E T D F M T E Y V V T R

b<sub>2</sub>
b<sub>3</sub>
b<sub>4</sub>
b<sub>5</sub>
b<sub>6</sub>
y<sub>14</sub><sup>2+</sup>
y<sub>13</sub>
y<sub>12</sub>
y<sub>11</sub>
y<sub>10</sub>
y<sub>9</sub>
y<sub>8</sub><sup>ox</sup>
y<sub>7</sub>
y<sub>6</sub>
y<sub>5</sub><sup>ph</sup>
y<sub>4</sub>
y<sub>3</sub>
y<sub>2</sub>
y<sub>1</sub>

Raw file Scan Method Score m/z  
 sys\_15\_1 25788 FTMS; HCD 43.68 599.77

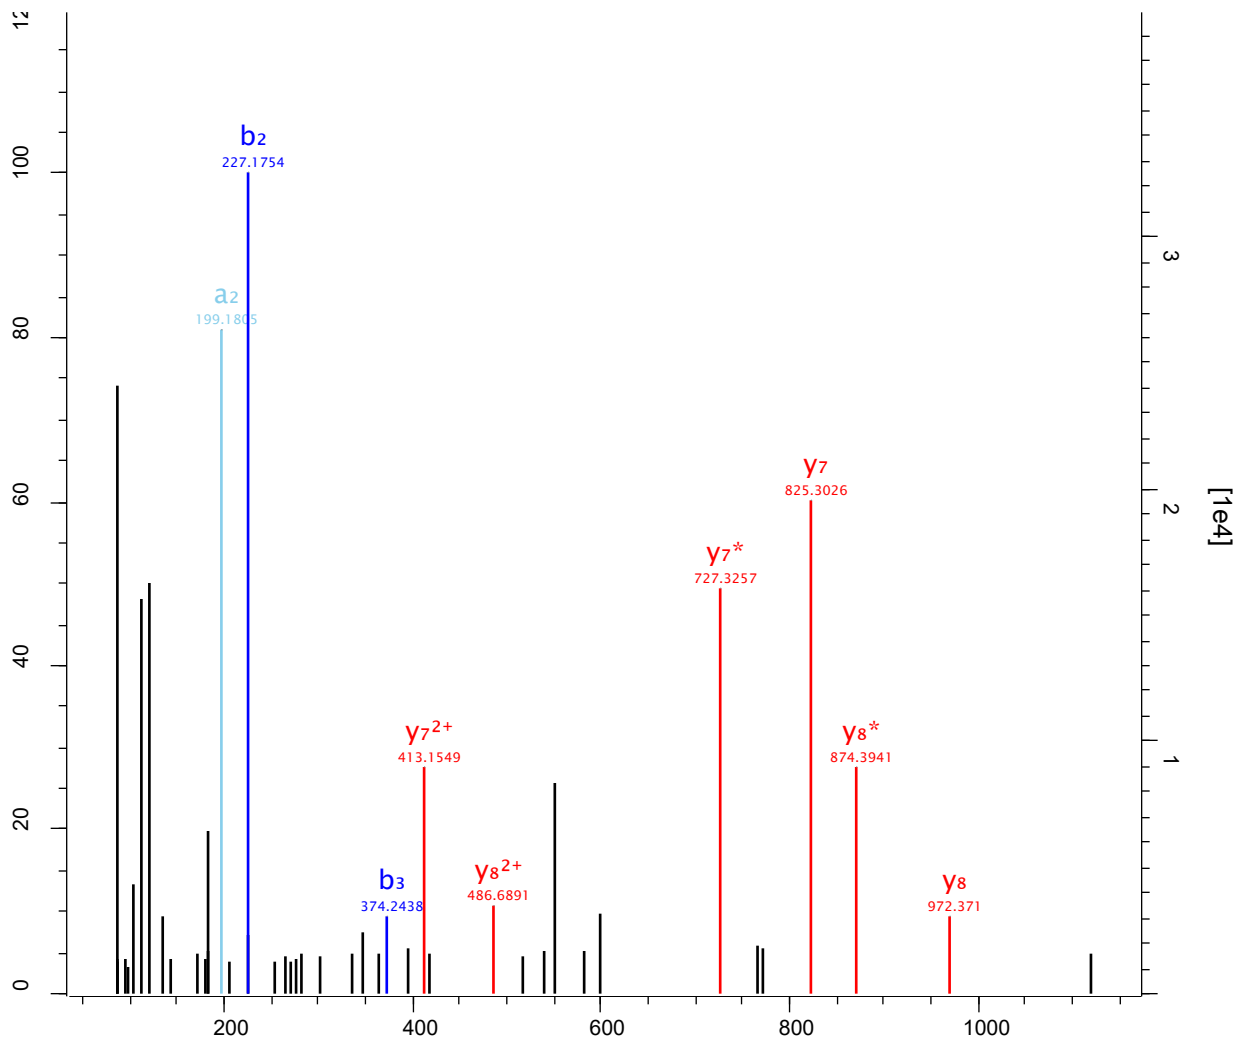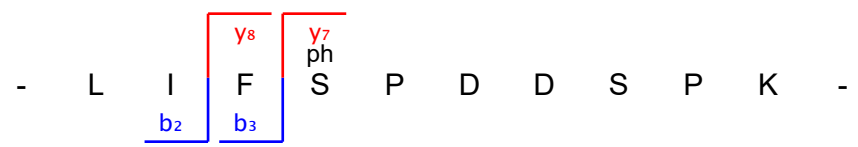

Raw file Scan Method Score m/z  
 sys\_15\_1 25982 FTMS; HCD 118.48 729.85

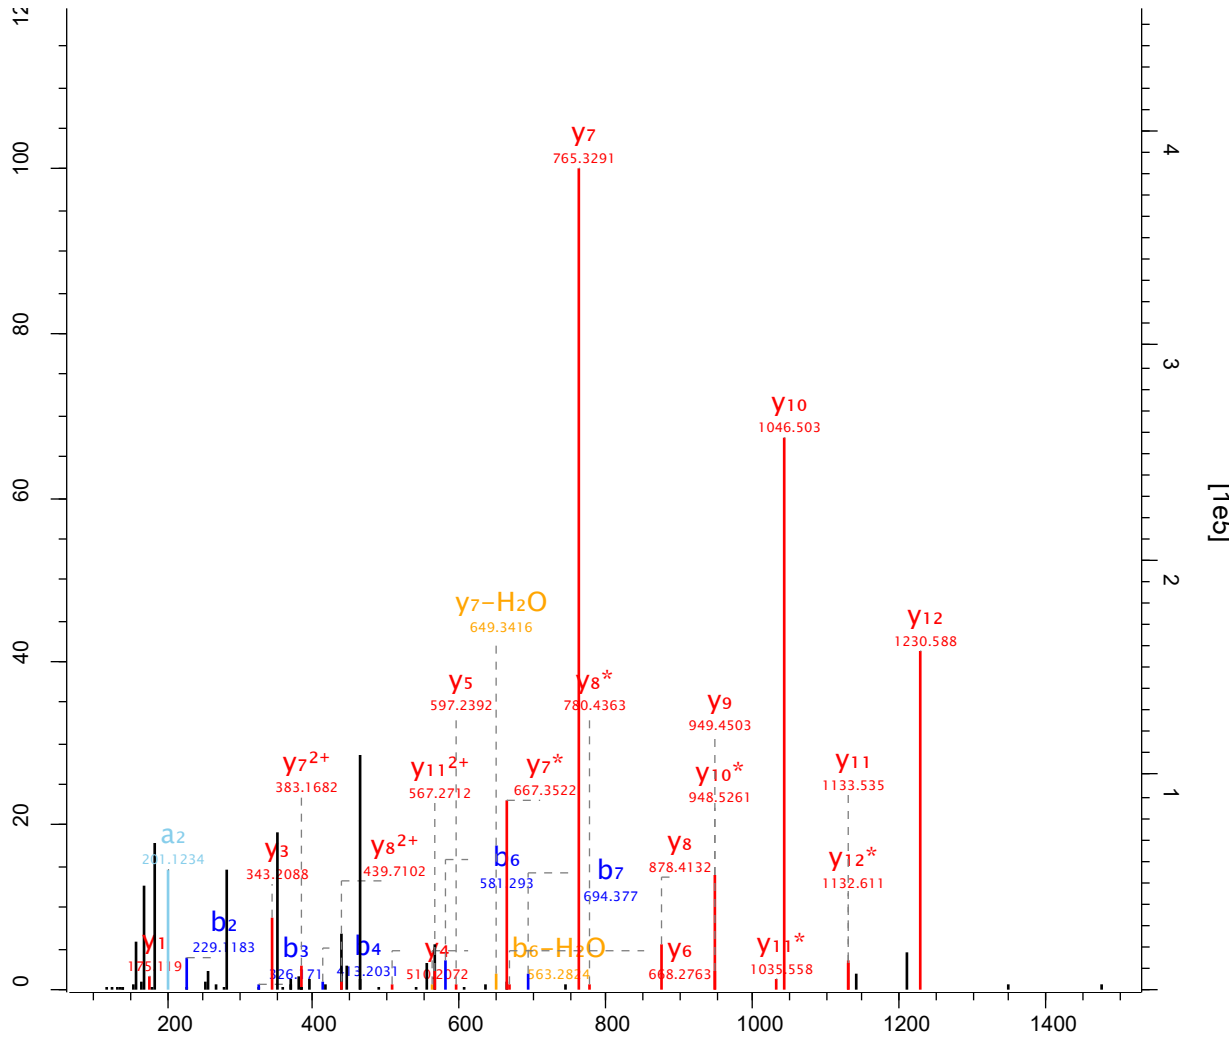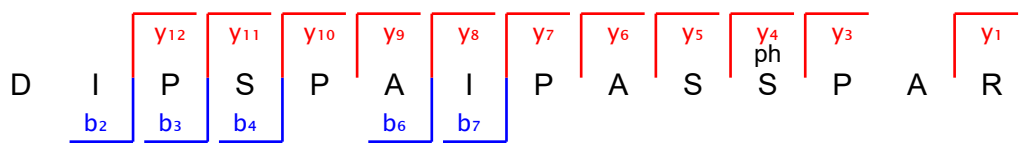

Raw file Scan Method Score m/z  
 sys\_15\_1 26076 FTMS; HCD 80.96 692.81

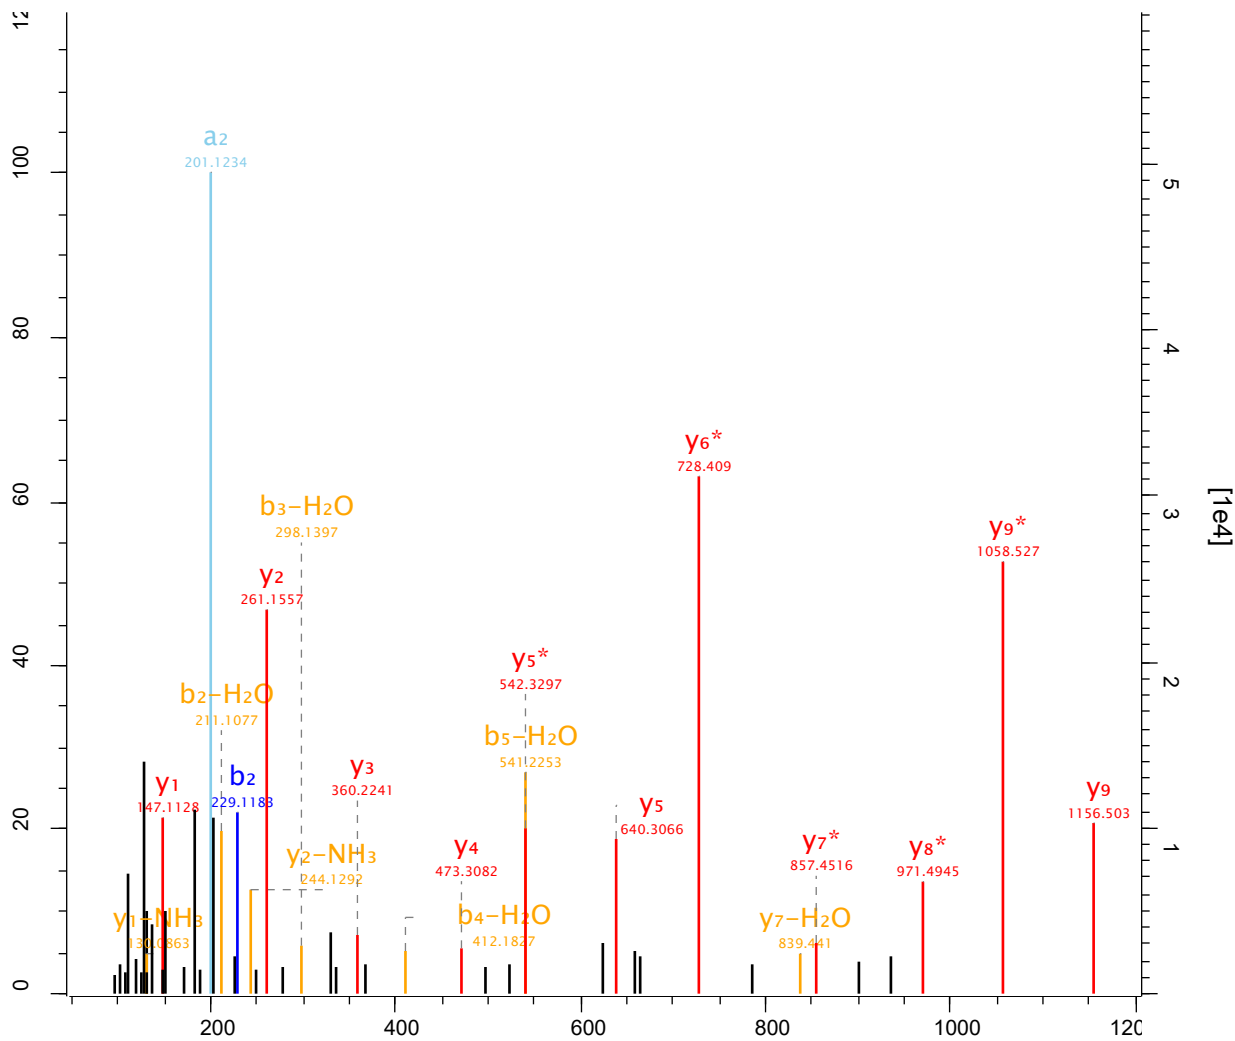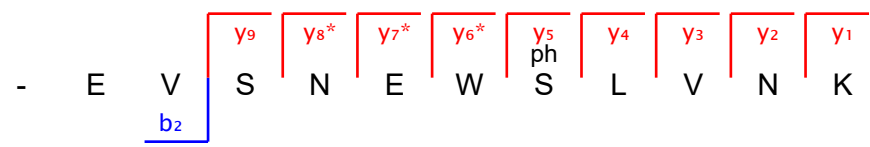

Raw file Scan Method Score m/z  
 sys\_15\_1 26147 FTMS; HCD 61.11 544.23

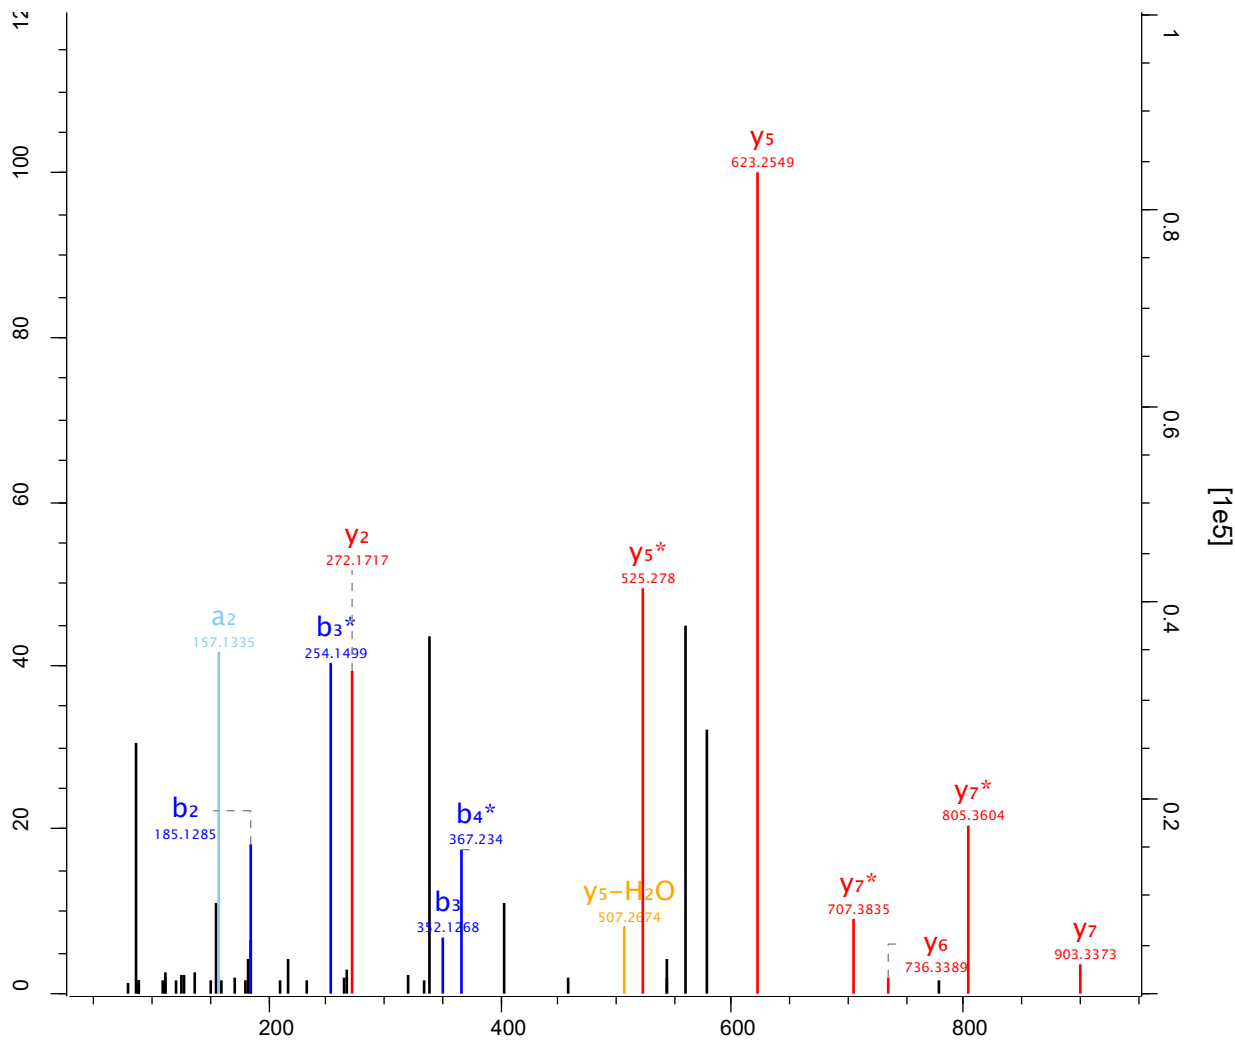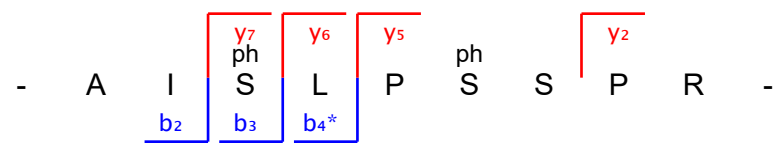



Raw file Scan Method Score m/z  
 sys\_15\_1 26149 FTMS; HCD 144.72 951.87

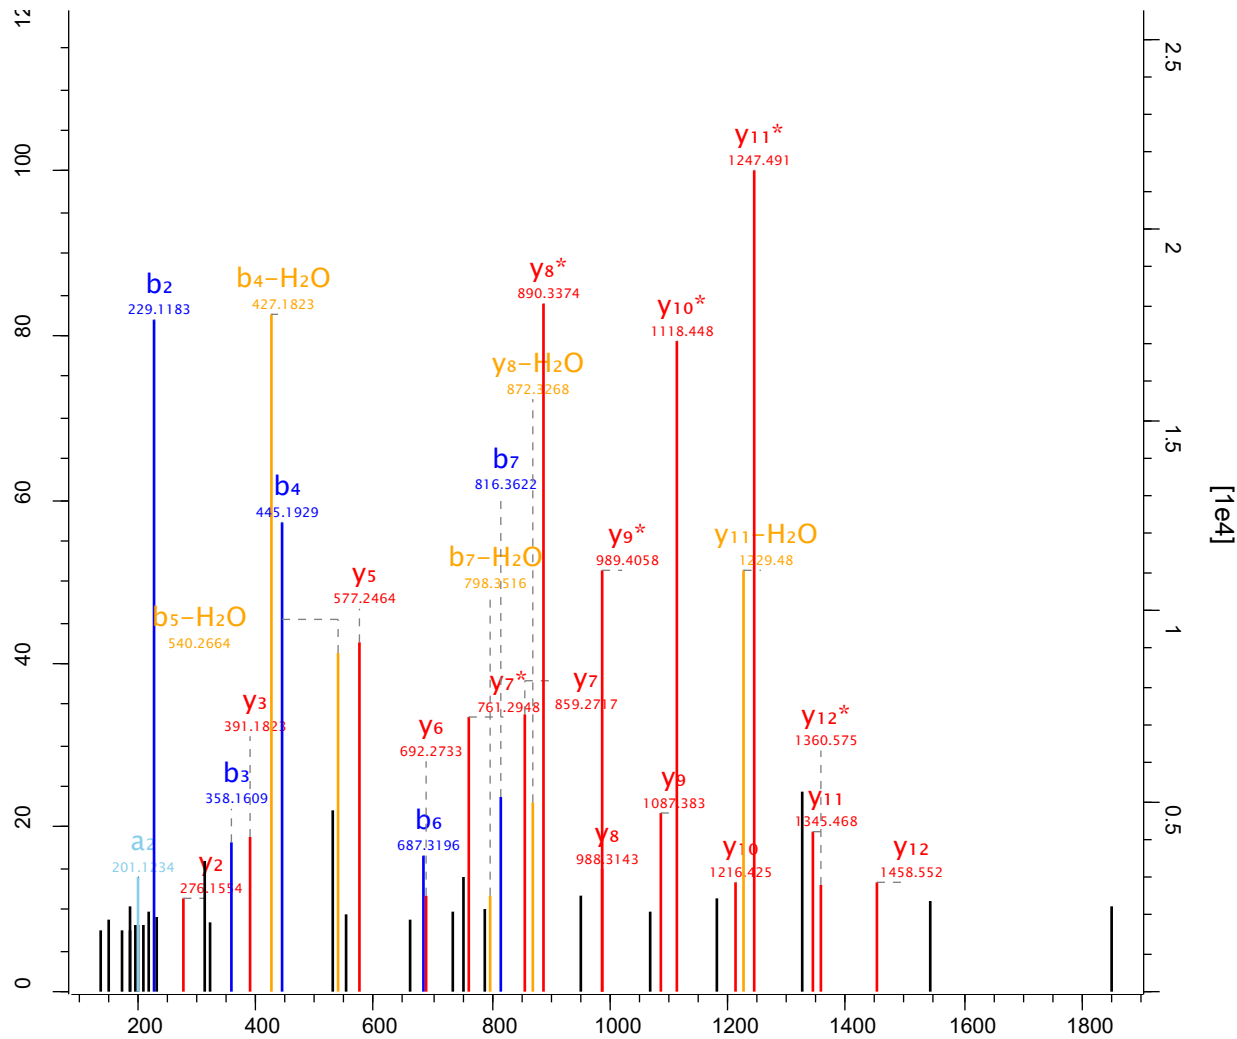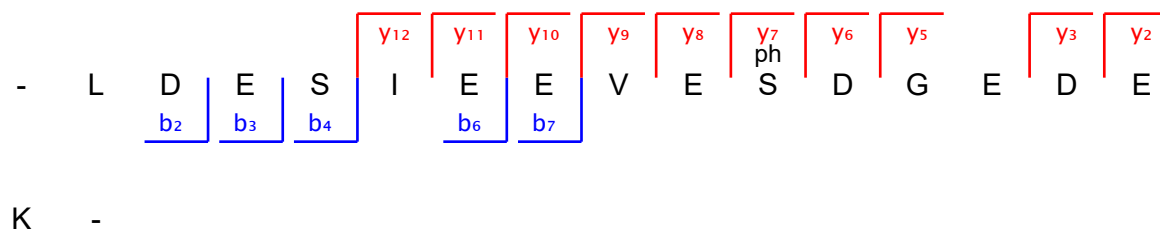

Raw file Scan Method Score m/z  
 sys\_15\_1 26250 FTMS; HCD 150.36 623.97

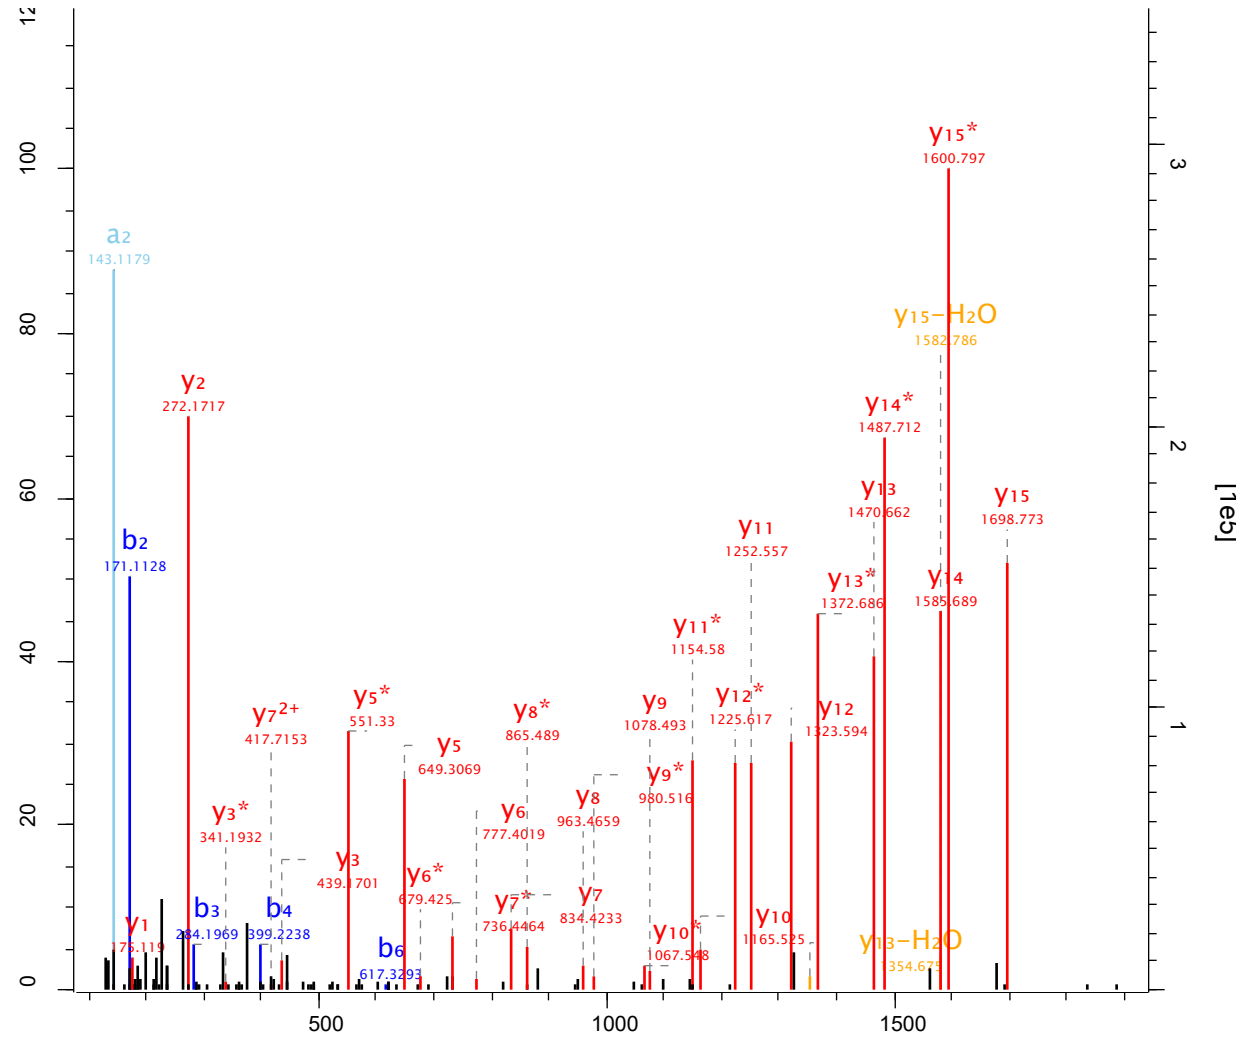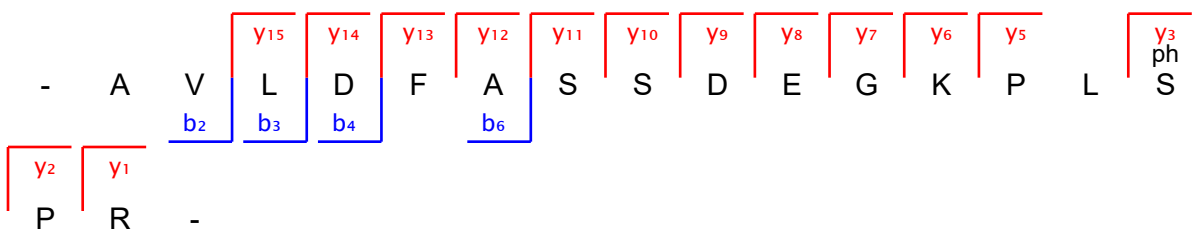

Raw file Scan Method Score m/z  
 sys\_15\_1 26314 FTMS; HCD 161.68 1039.82

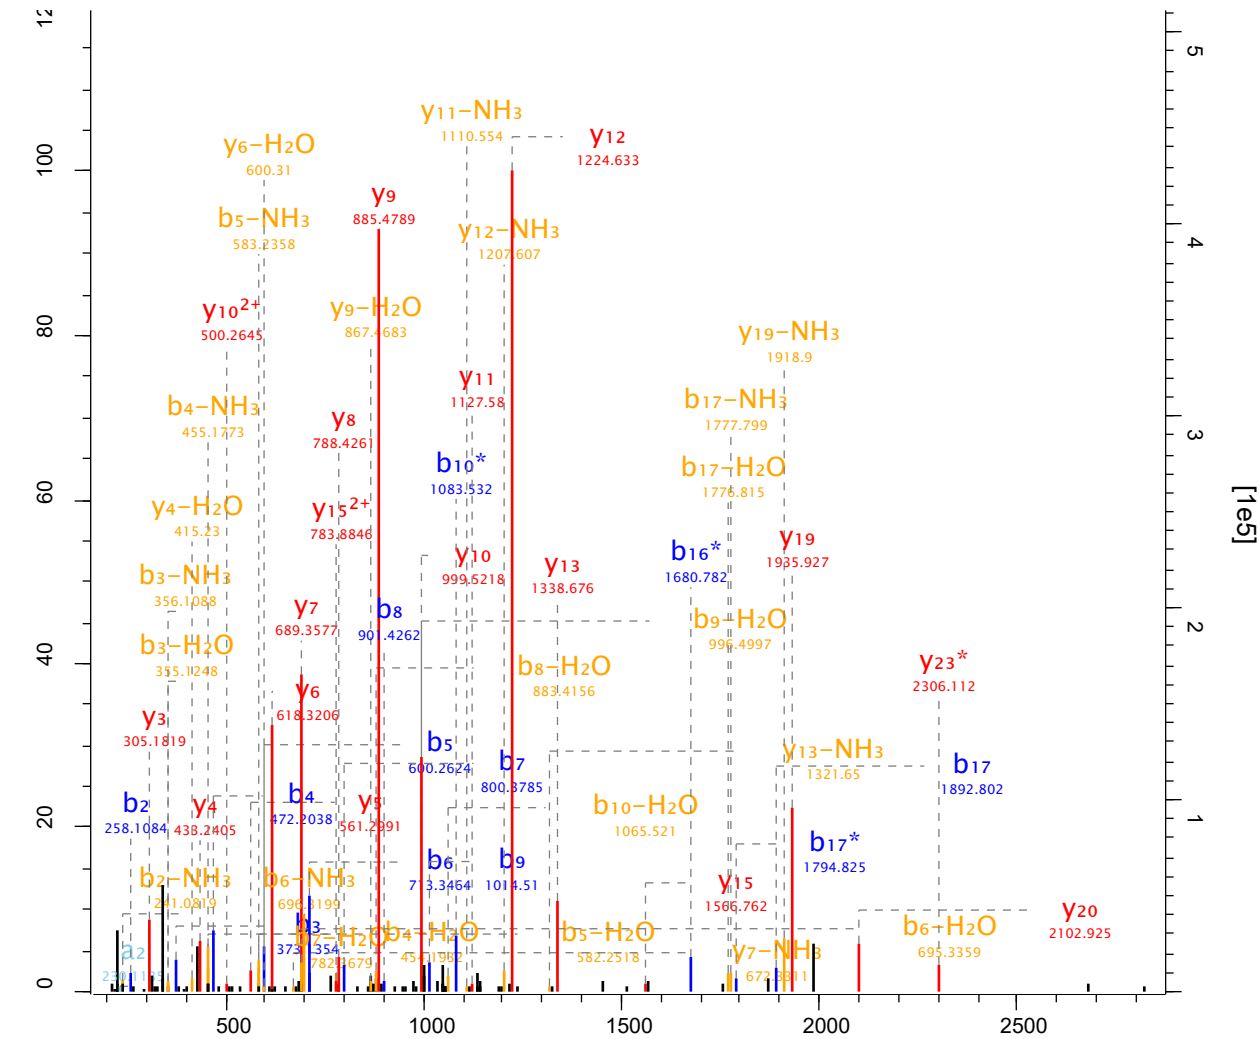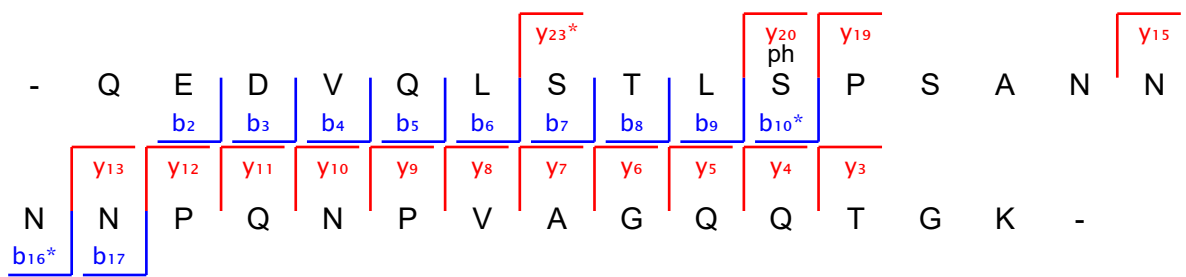

Raw file Scan Method Score m/z  
 sys\_15\_1 26419 FTMS; HCD 165.3 801.04

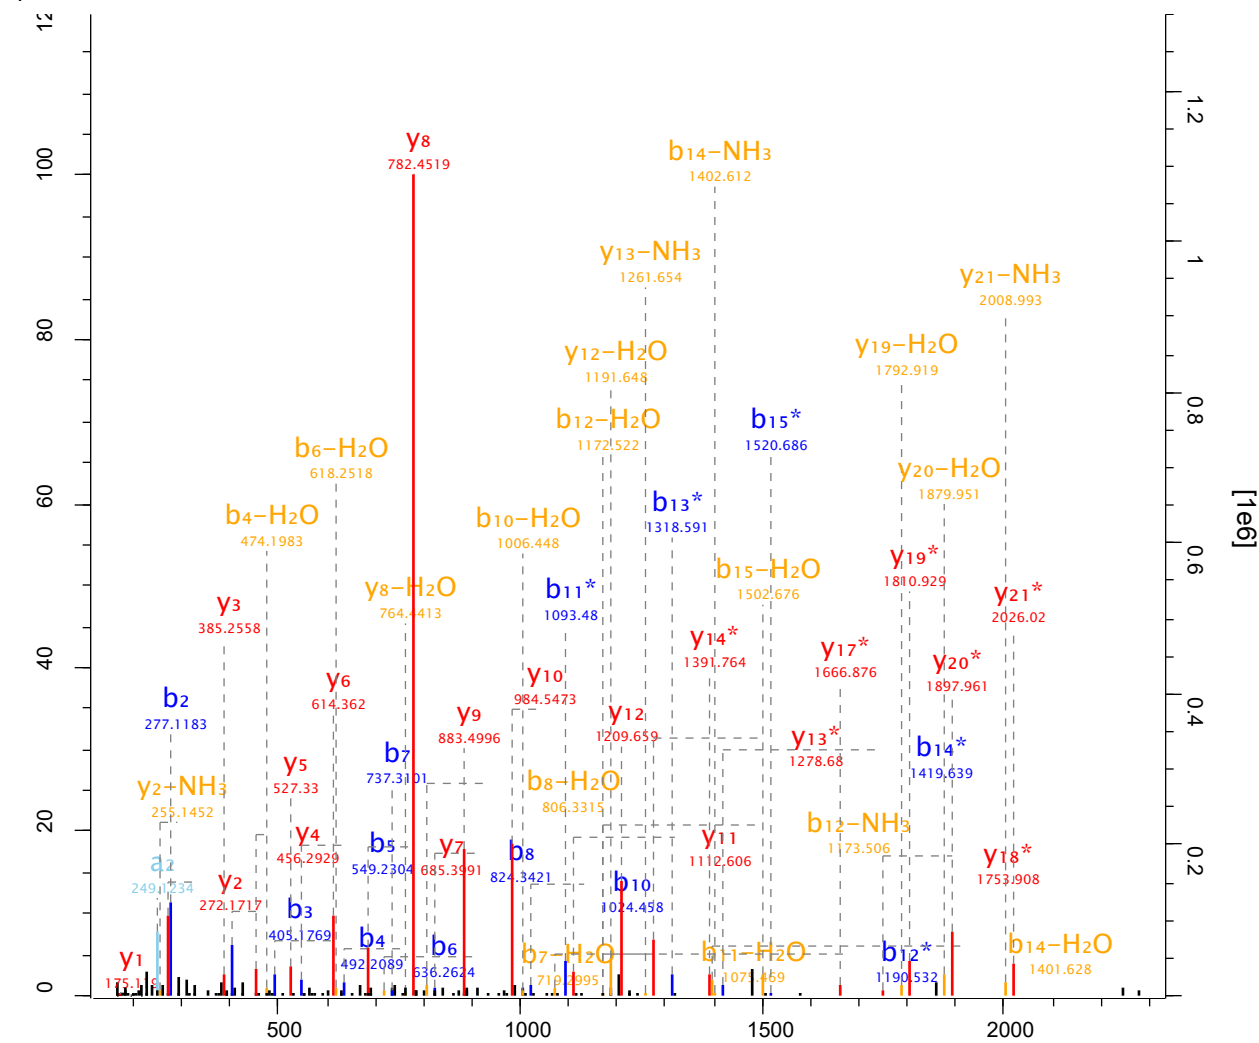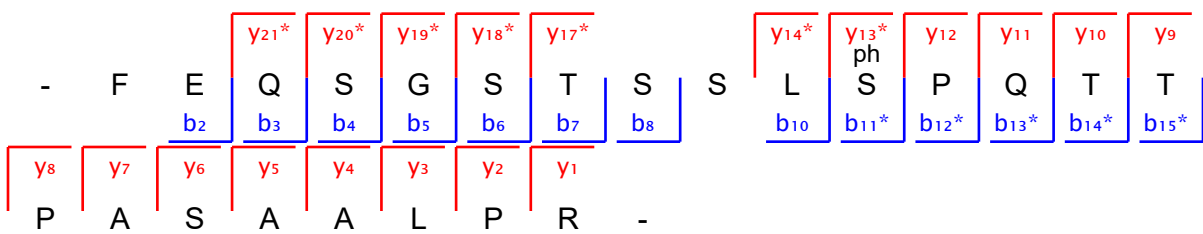

Raw file Scan Method Score m/z  
 sys\_15\_1 26467 FTMS; HCD 63.68 714.81

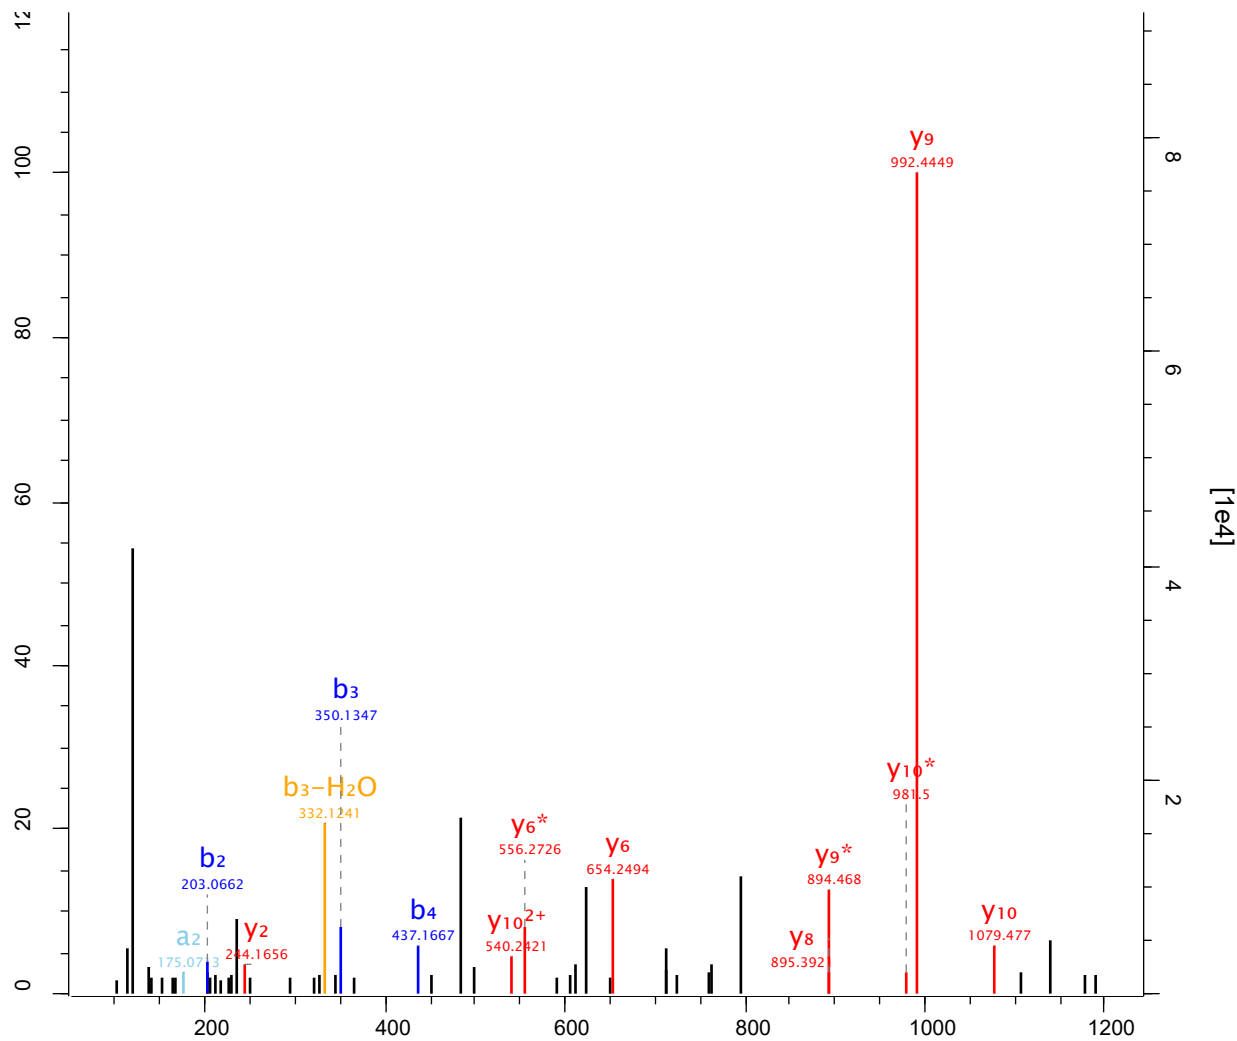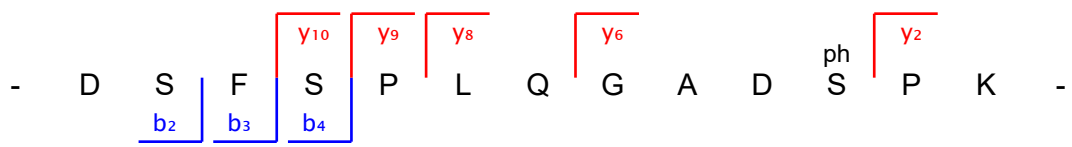

Raw file sys\_15\_1 Scan 2650 Method FTMS; HCD Score 198.98 m/z 697.78

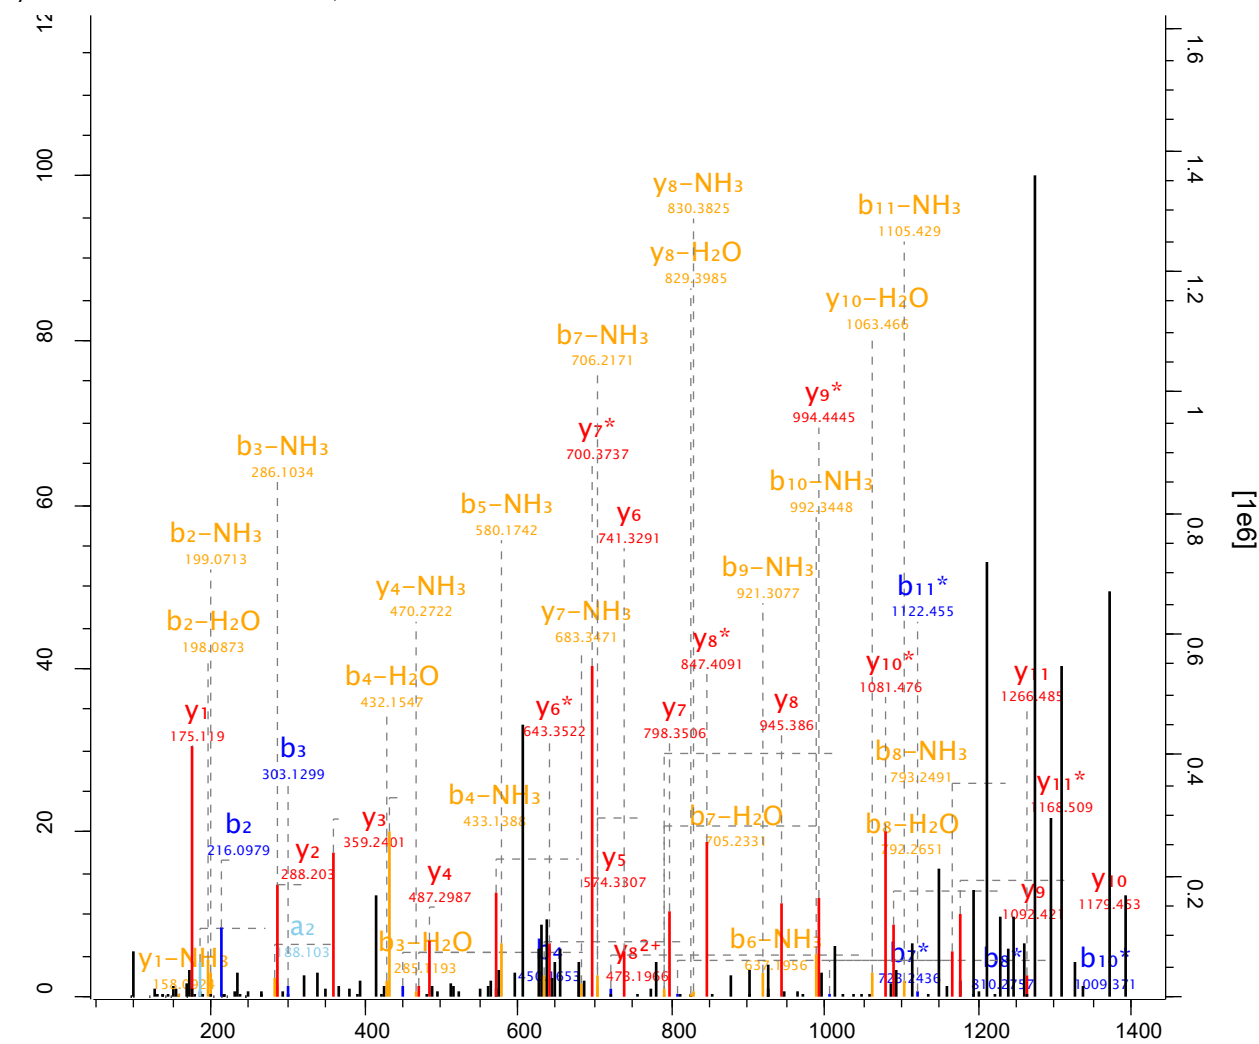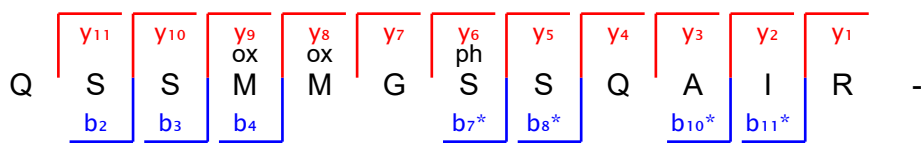

Raw file Scan Method Score m/z  
 sys\_15\_1 26518 FTMS; HCD 88.54 749

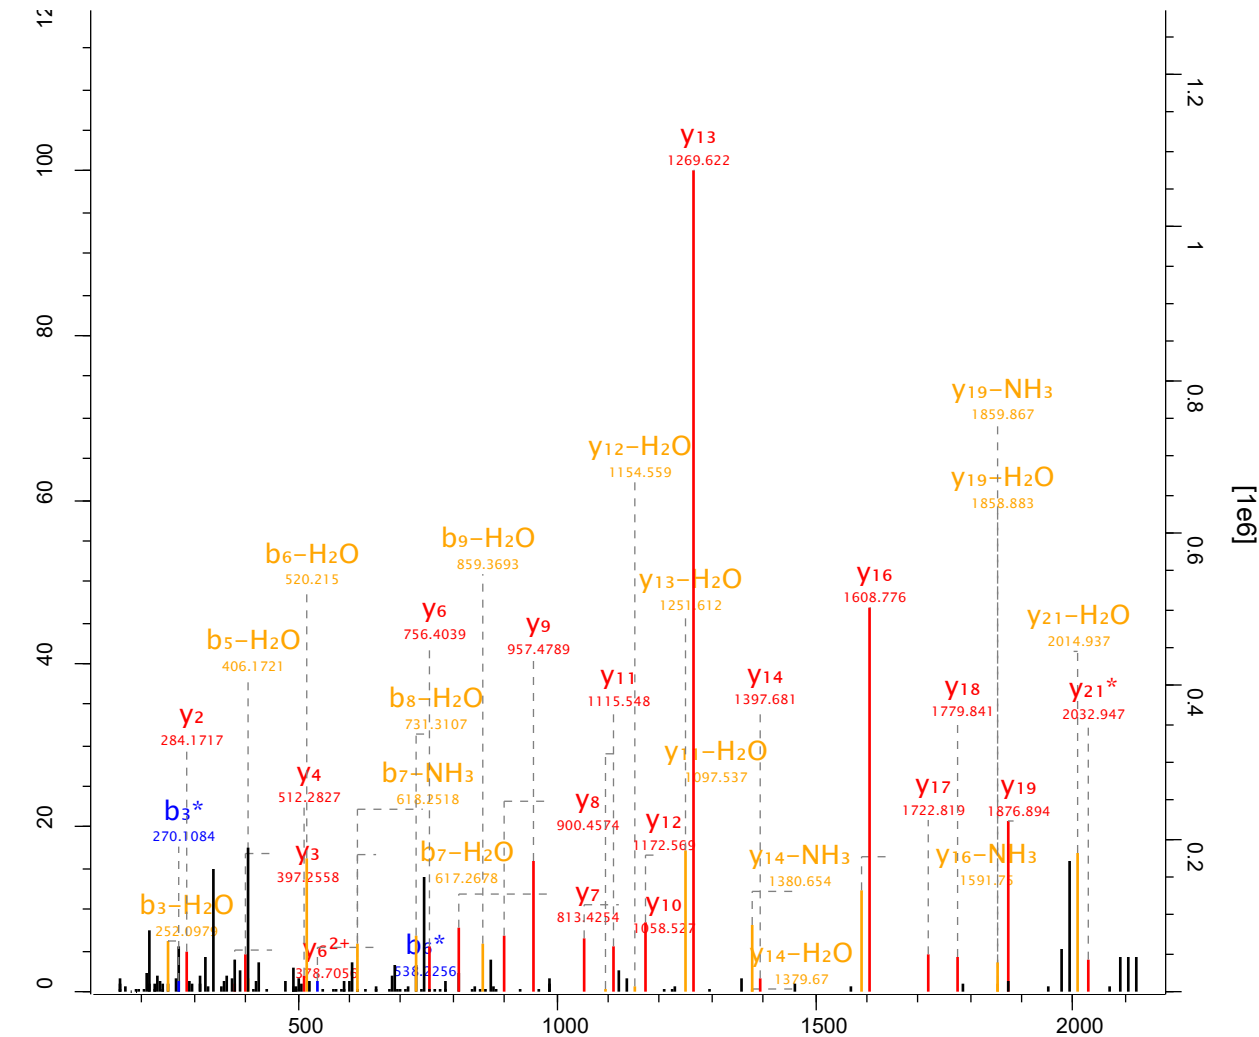

ac  
 - A S S P G N P N Q P G G T G S  
 y21\* ph  
 y19 y18 y17 y16  
 b3\* b6\*  
 y7 y6 y4 y3 y2  
 G P F D I H K -

Raw file Scan Method Score m/z  
 sys\_15\_1 26601 FTMS; HCD 139.86 607.76

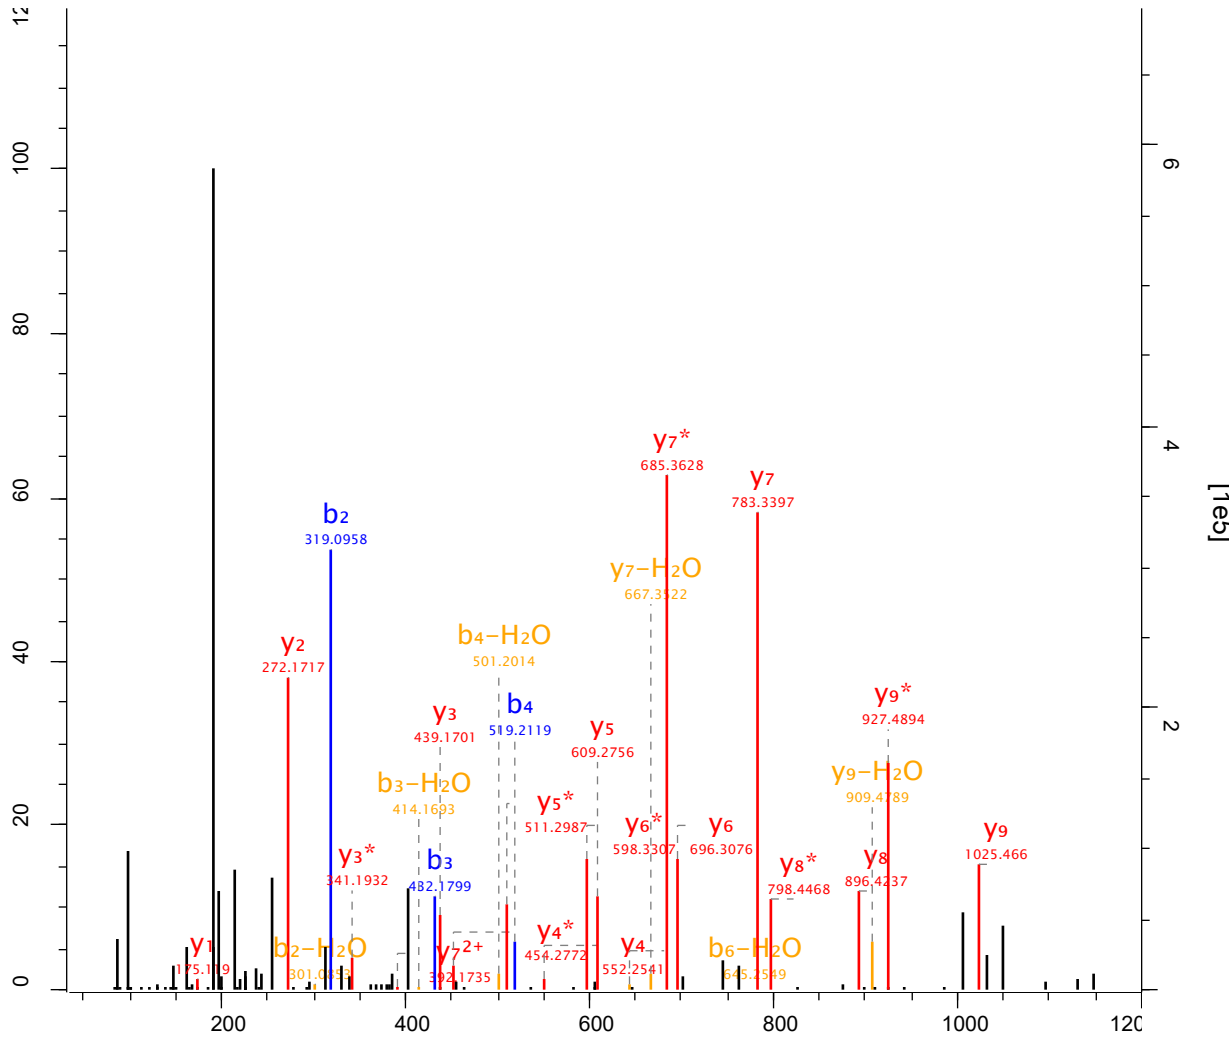

ac ox M y9 y8 y7 y6 y5 y4 y3 y2 y1  
 - M E I S S G L S P R -



Raw file Scan Method Score m/z  
 sys\_15\_1 26741 FTMS; HCD 100.97 871.87

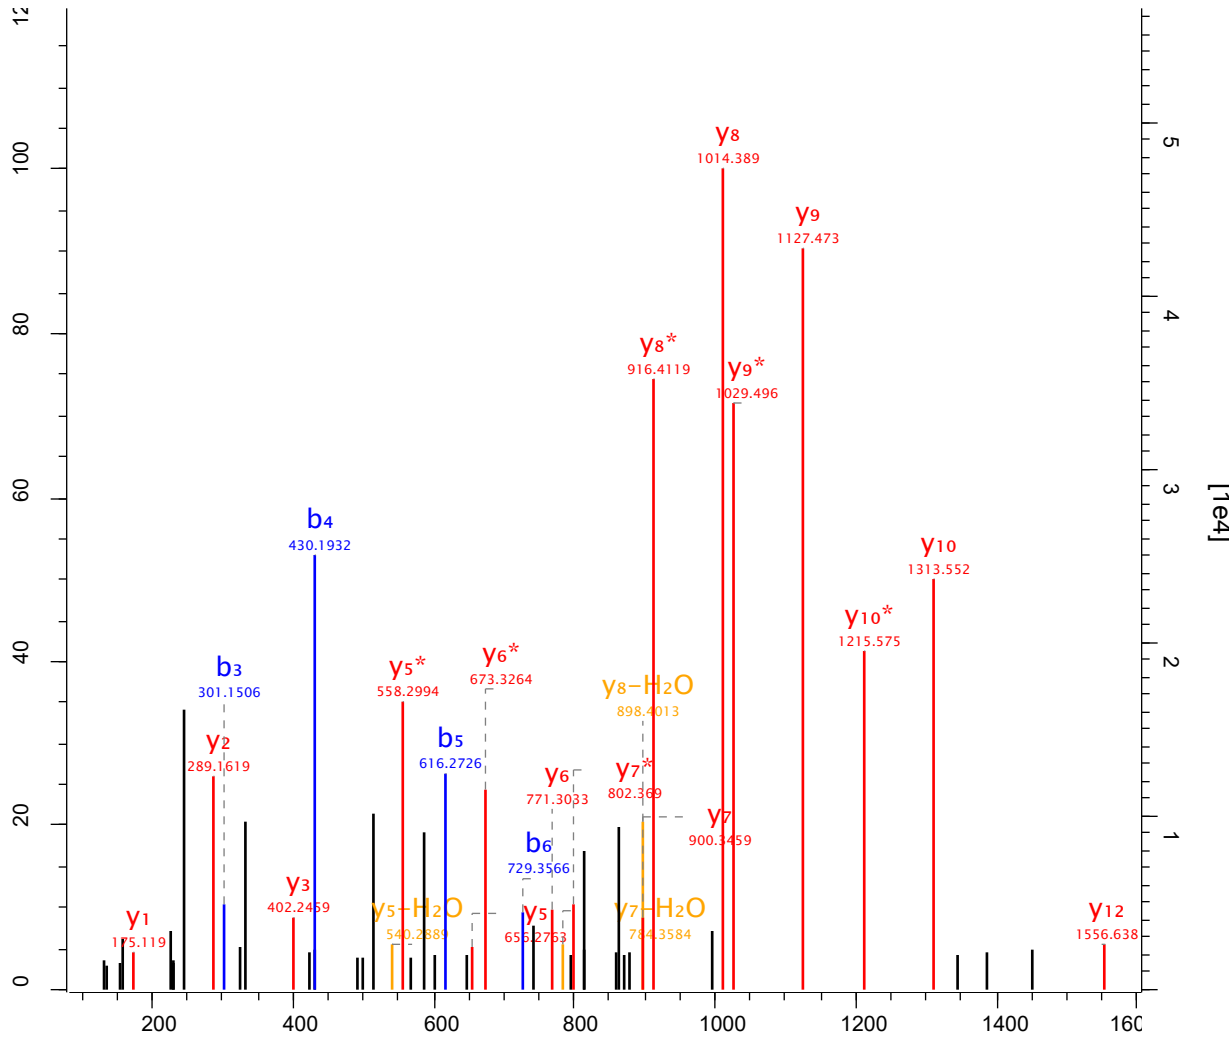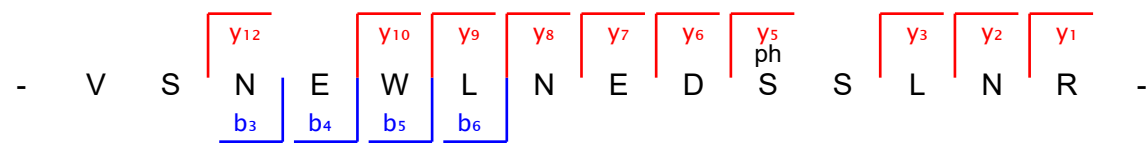

Raw file Scan Method Score m/z  
 sys\_15\_1 26783 FTMS; HCD 112.96 755.79

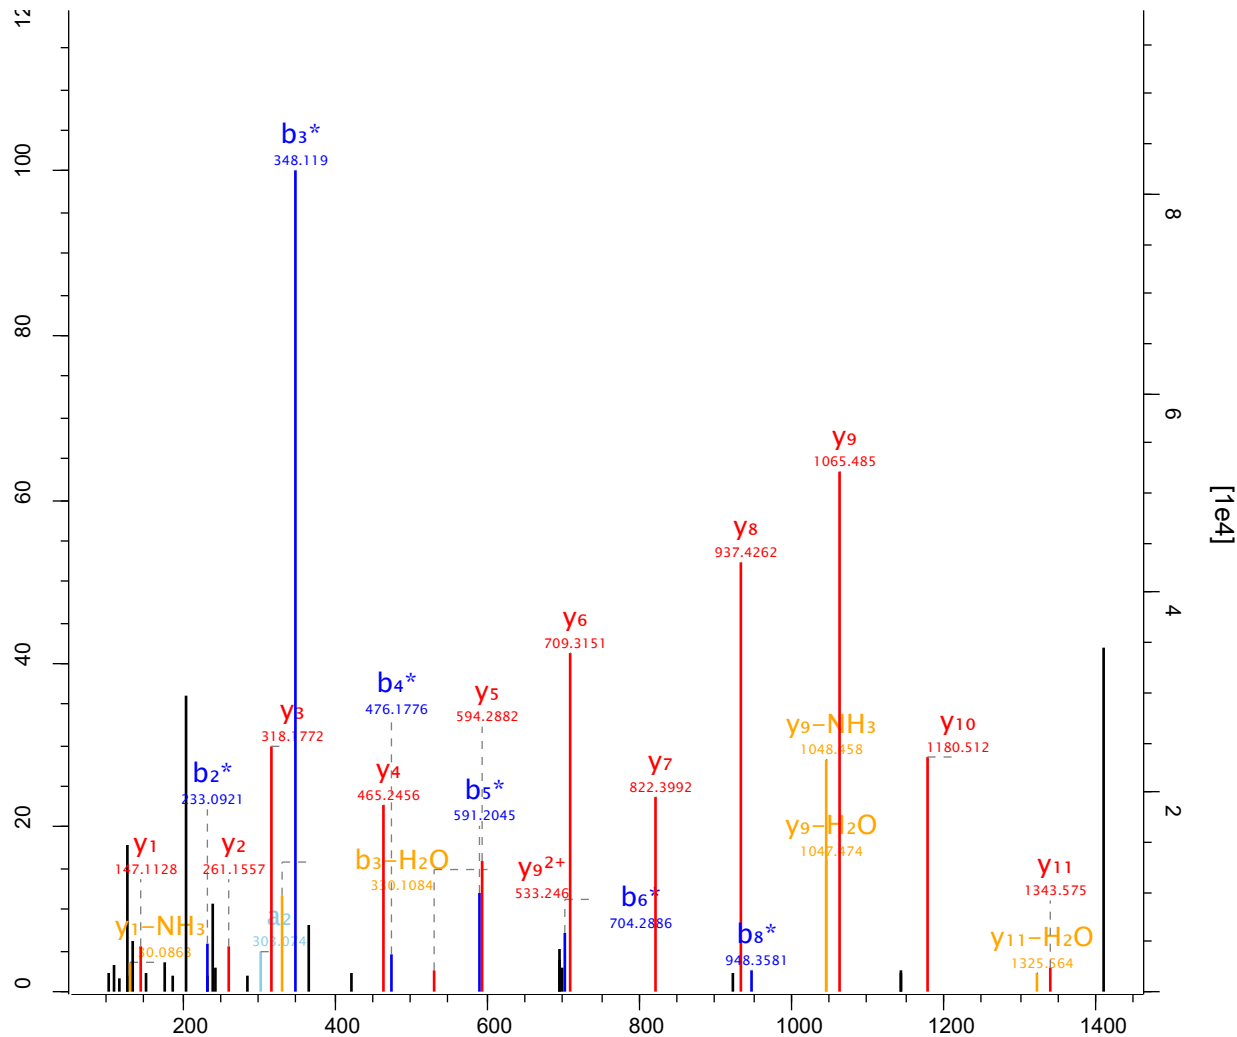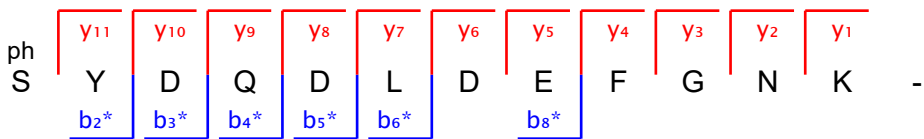

Raw file Scan Method Score m/z  
 sys\_15\_1 26808 FTMS; HCD 118.15 966.41

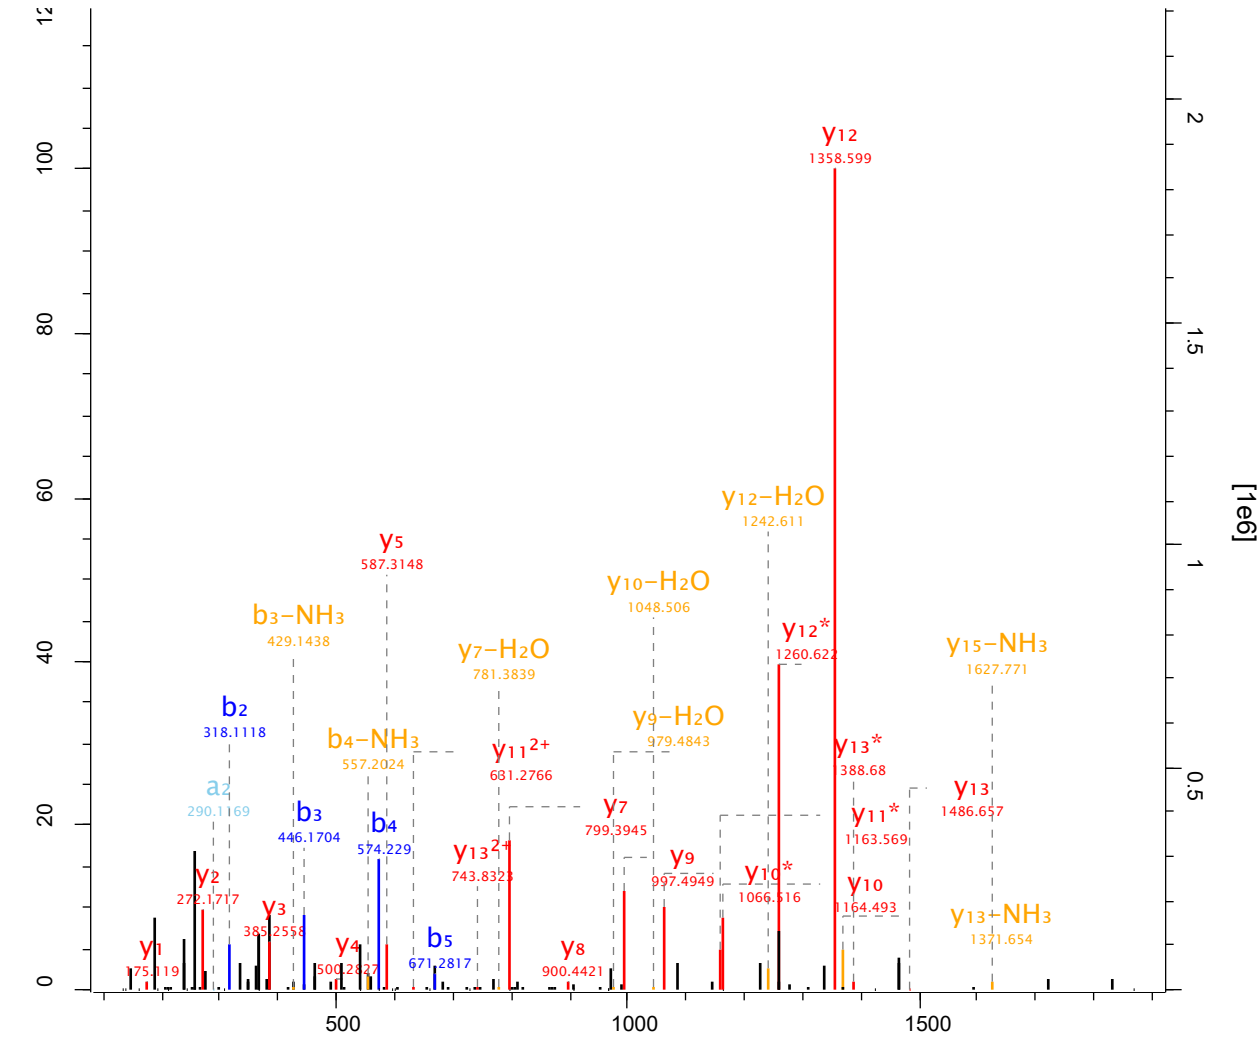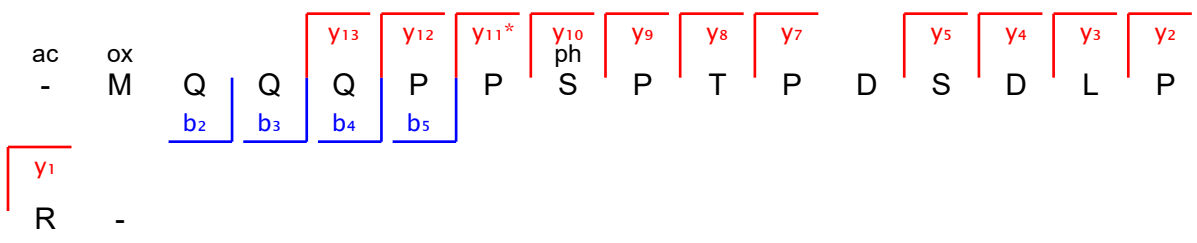

Raw file Scan Method Score m/z  
 sys\_15\_1 26823 FTMS; HCD 52.36 761.03

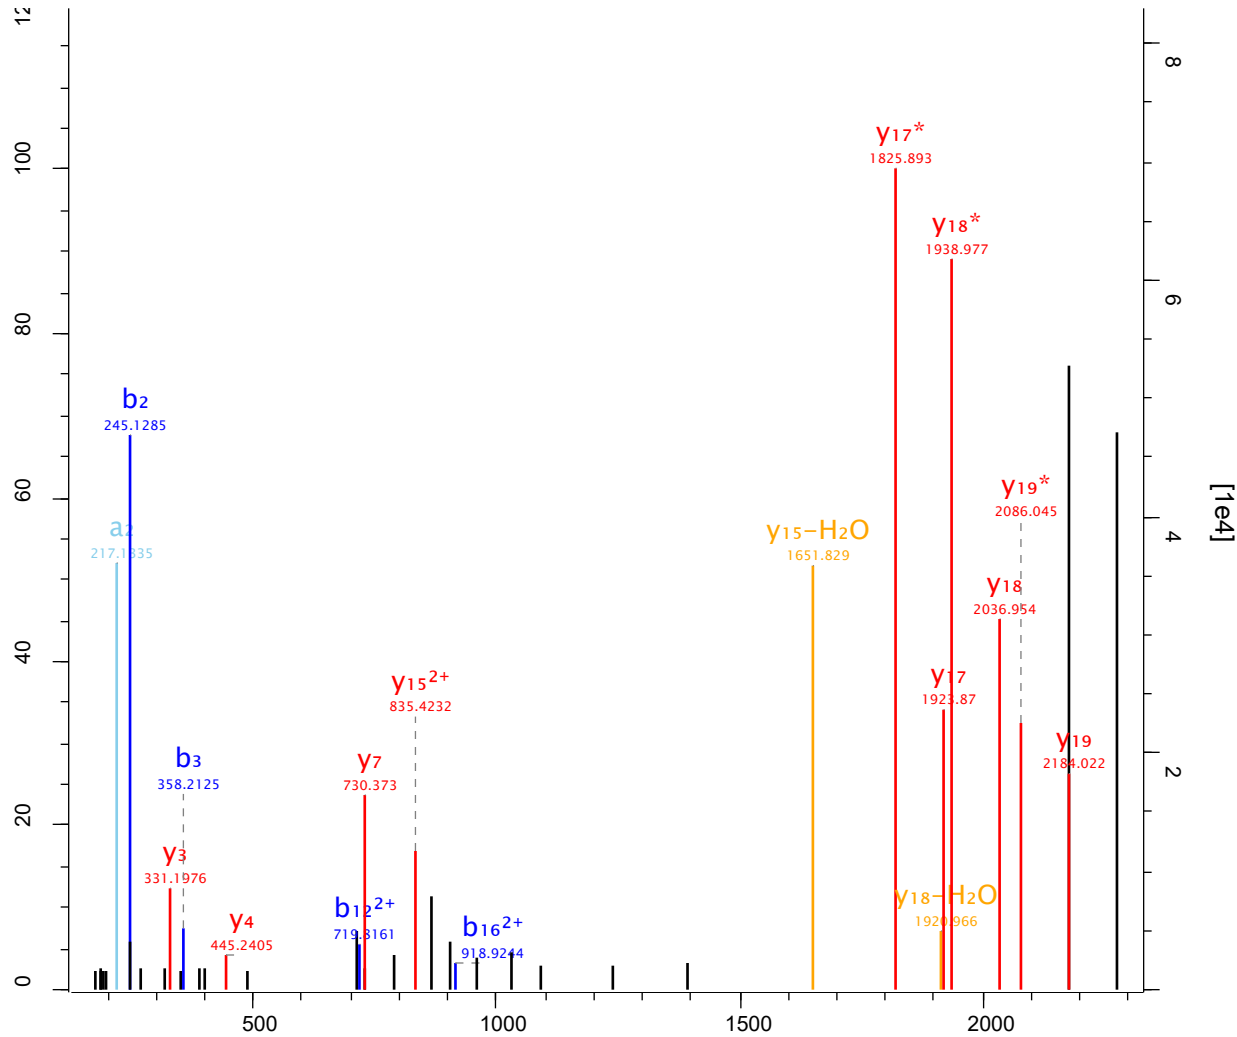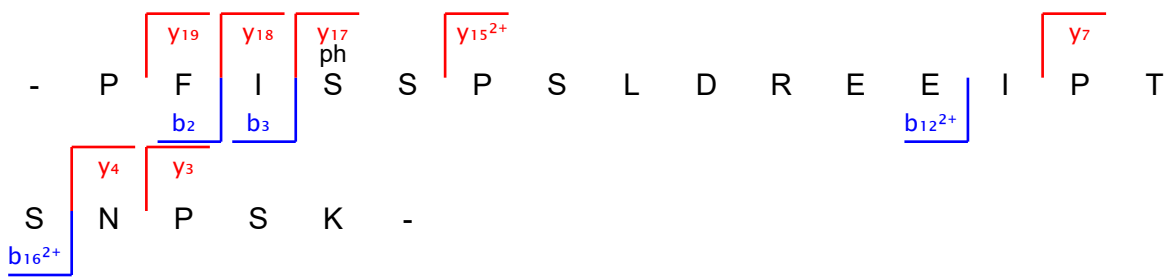

Raw file Scan Method Score m/z  
 sys\_15\_1 26825 FTMS; HCD 86.8 847.39

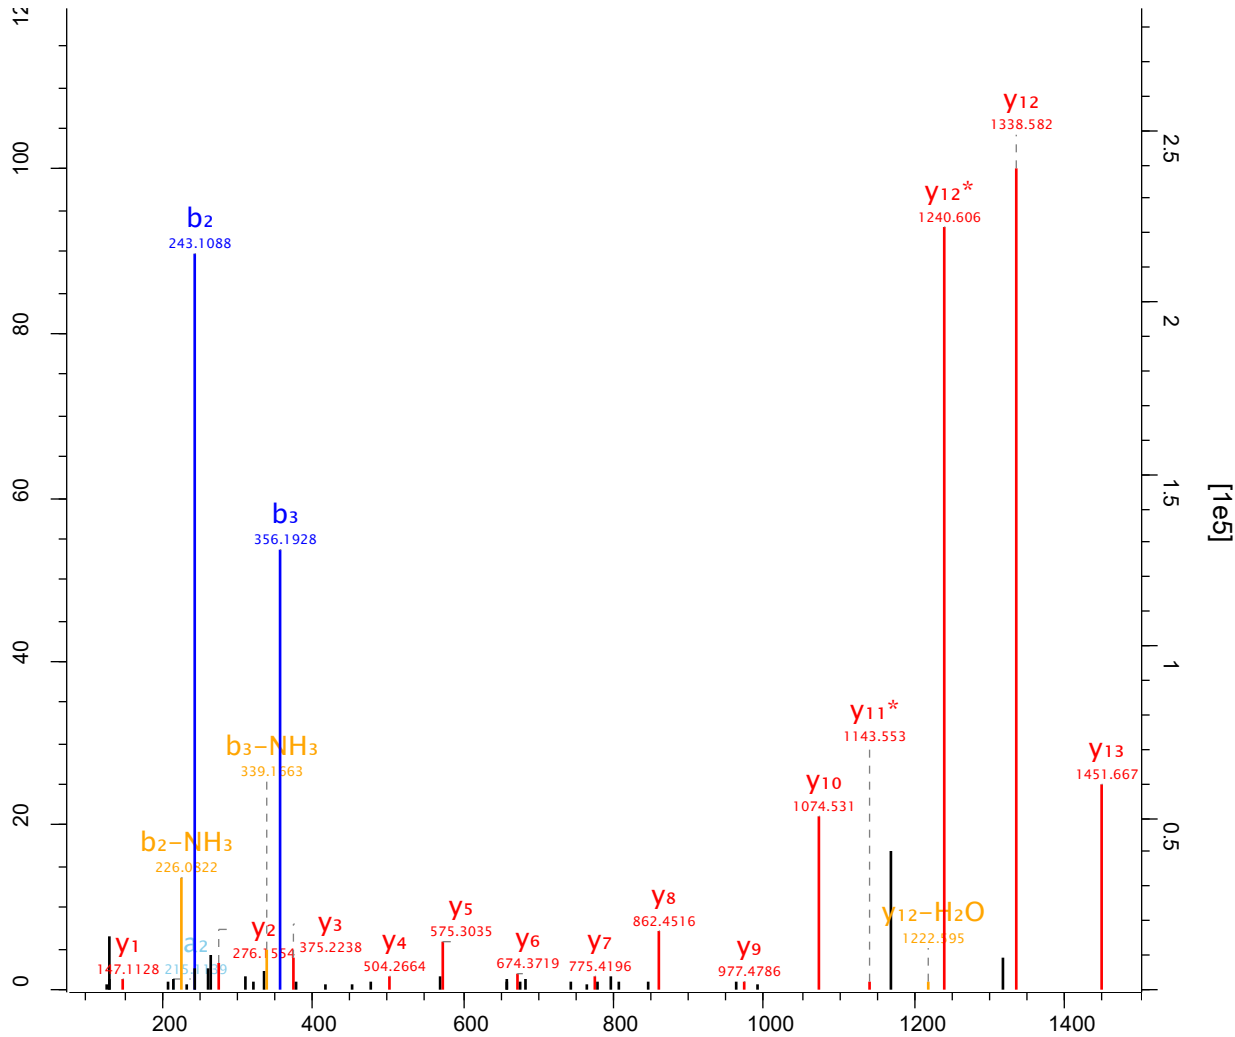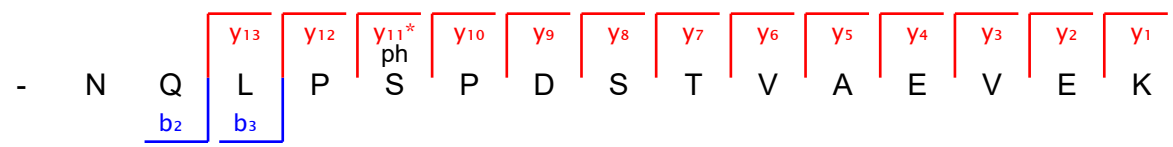

Raw file Scan Method Score m/z  
 sys\_15\_1 26888 FTMS; HCD 42.35 913.74

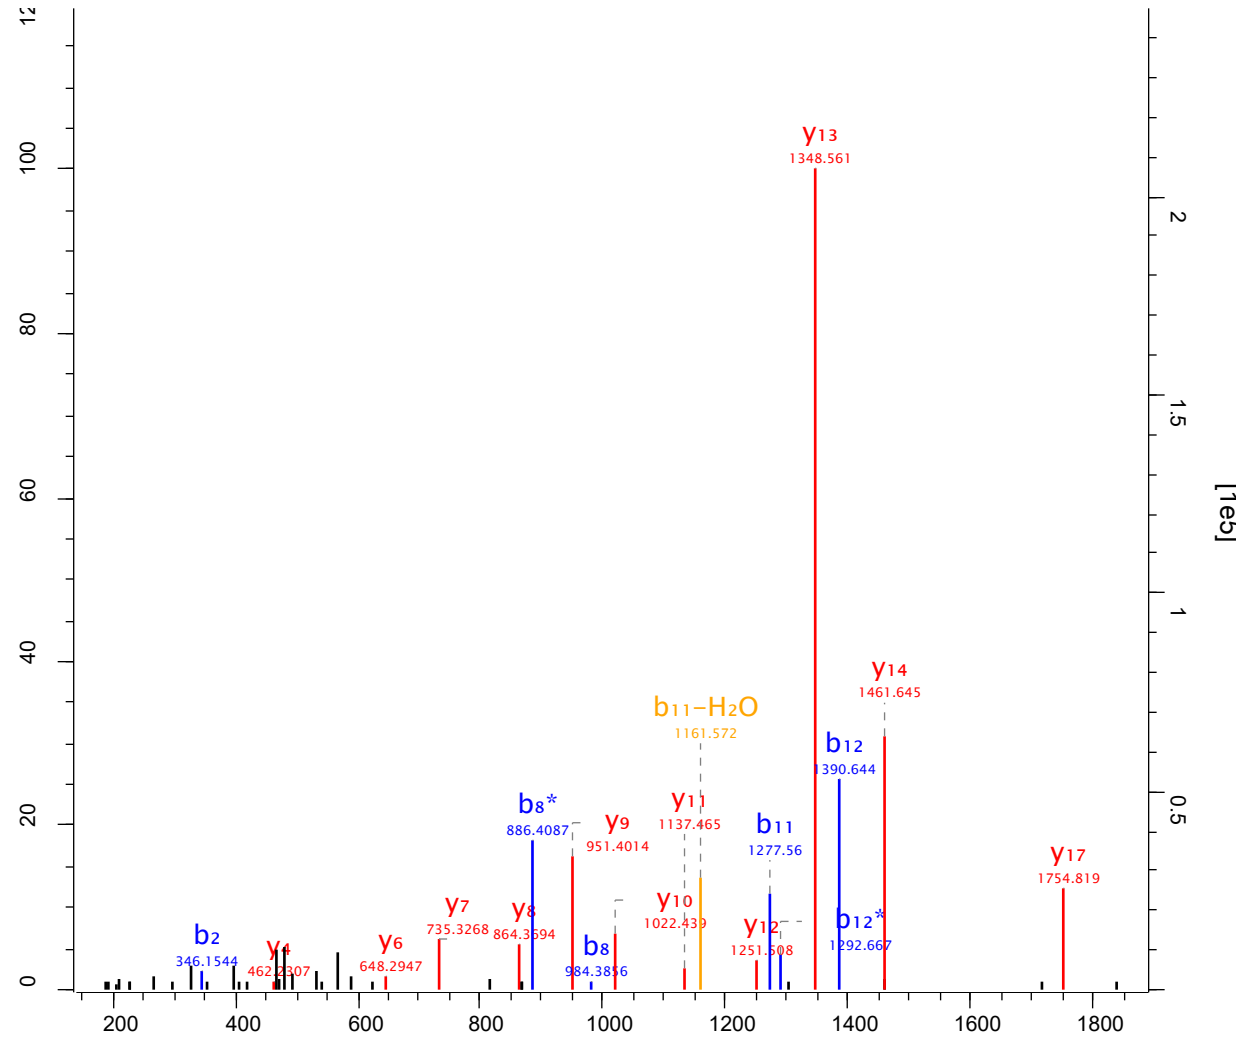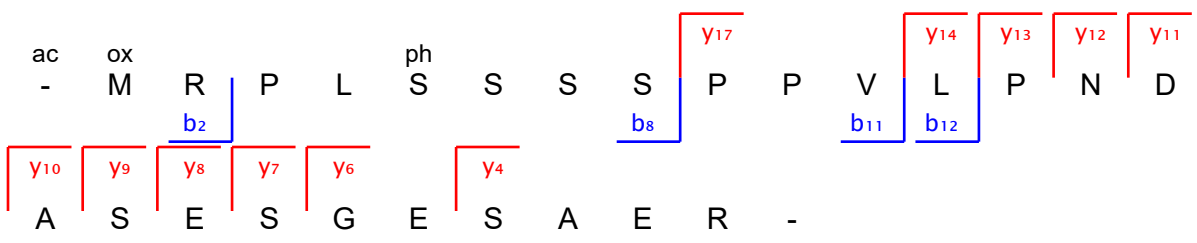

Raw file Scan Method Score m/z  
 sys\_15\_1 26921 FTMS; HCD 56.51 728.36

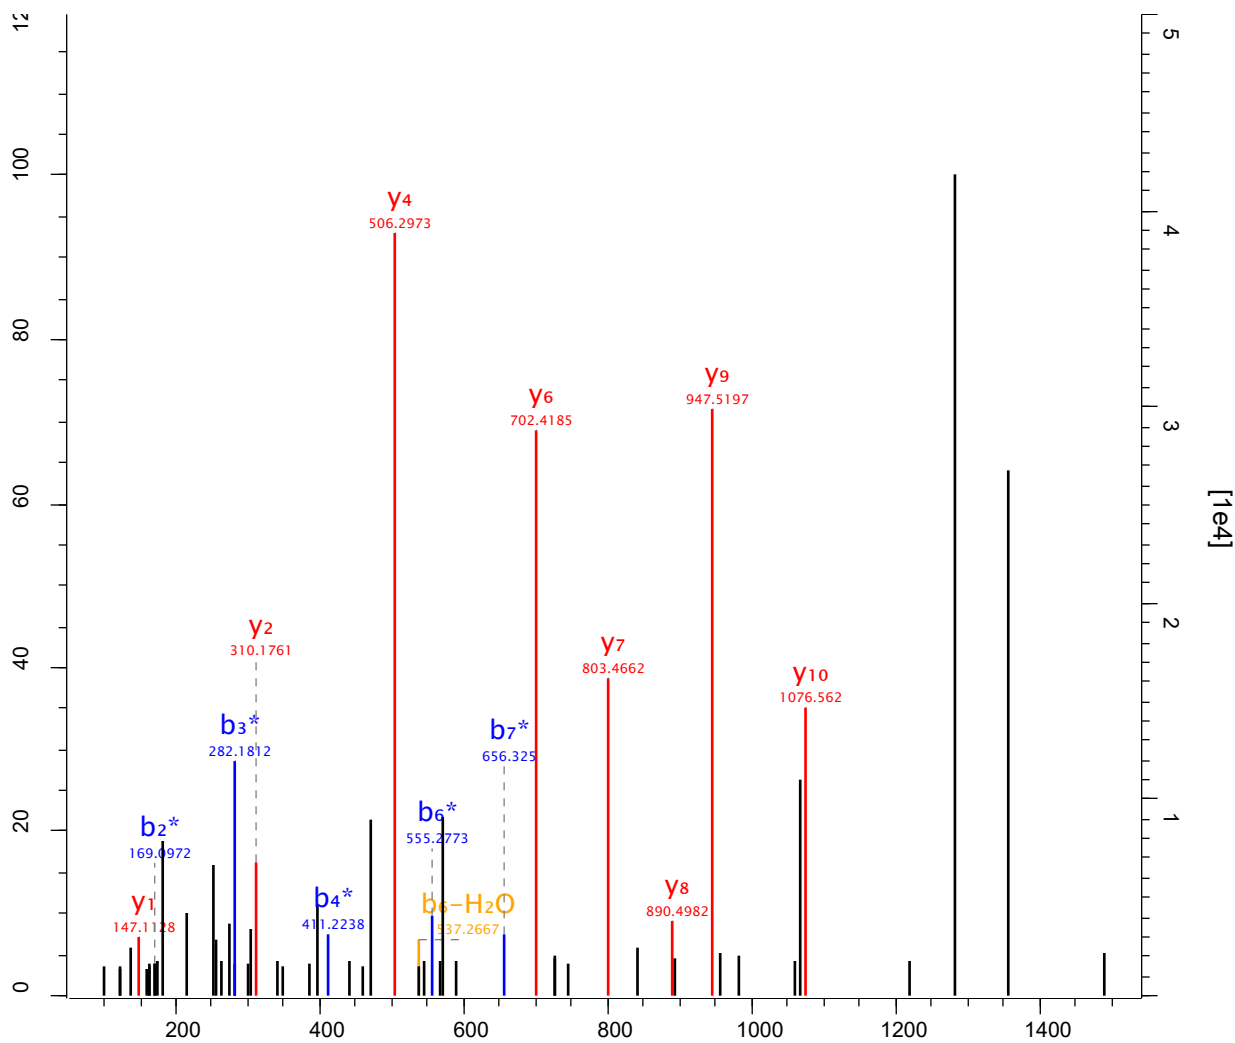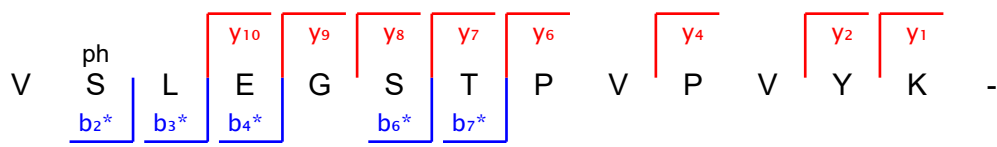

Raw file Scan Method Score m/z  
 sys\_15\_1 2696 FTMS; HCD 170.74 599.76

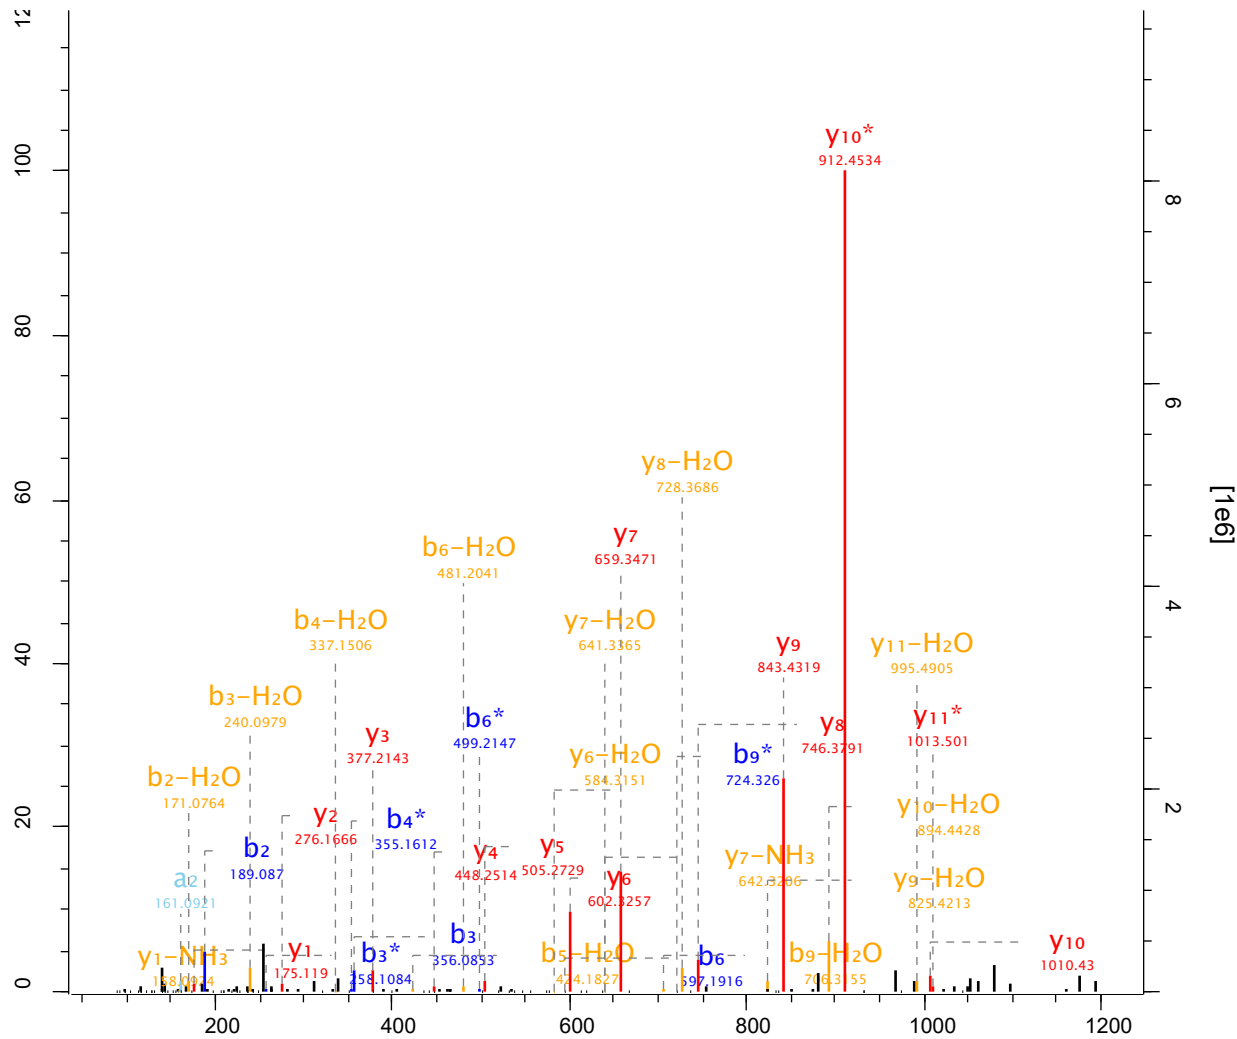

- S T P S G P G A T T R -

y11\*
y10
y9
y8
y7
y6
y5
y4
y3
y2
y1

b2
b3
b4\*
b6
b9\*



Raw file Scan Method Score m/z  
 sys\_15\_1 26962 FTMS; HCD 242.64 774.65

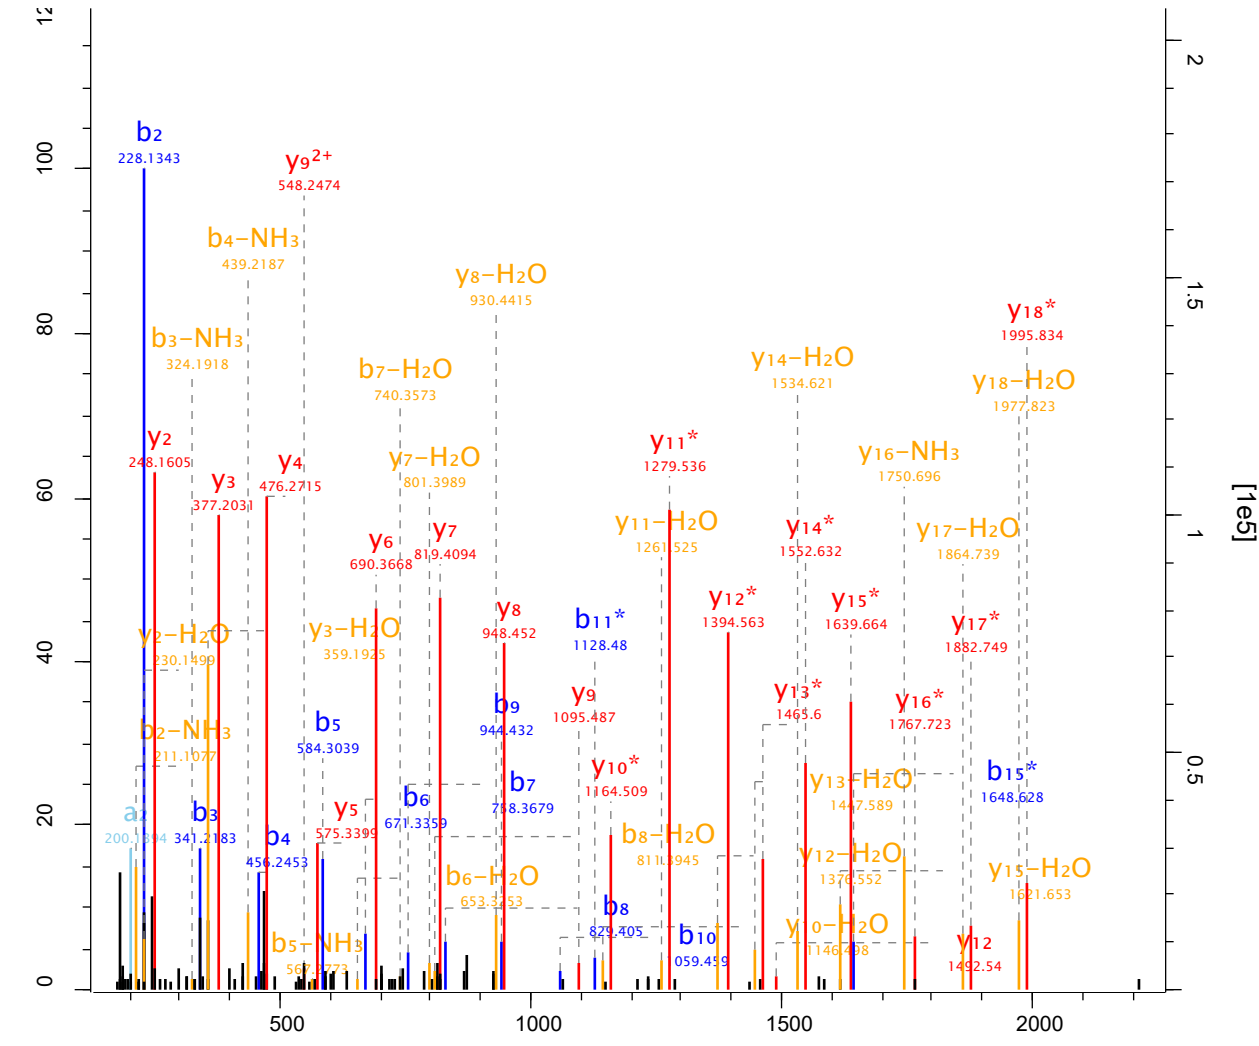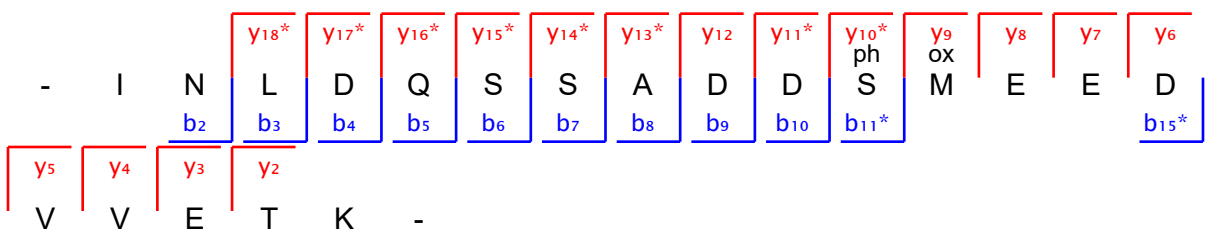

Raw file Scan Method Score m/z  
 sys\_15\_1 26965 FTMS; HCD 84.36 625.97

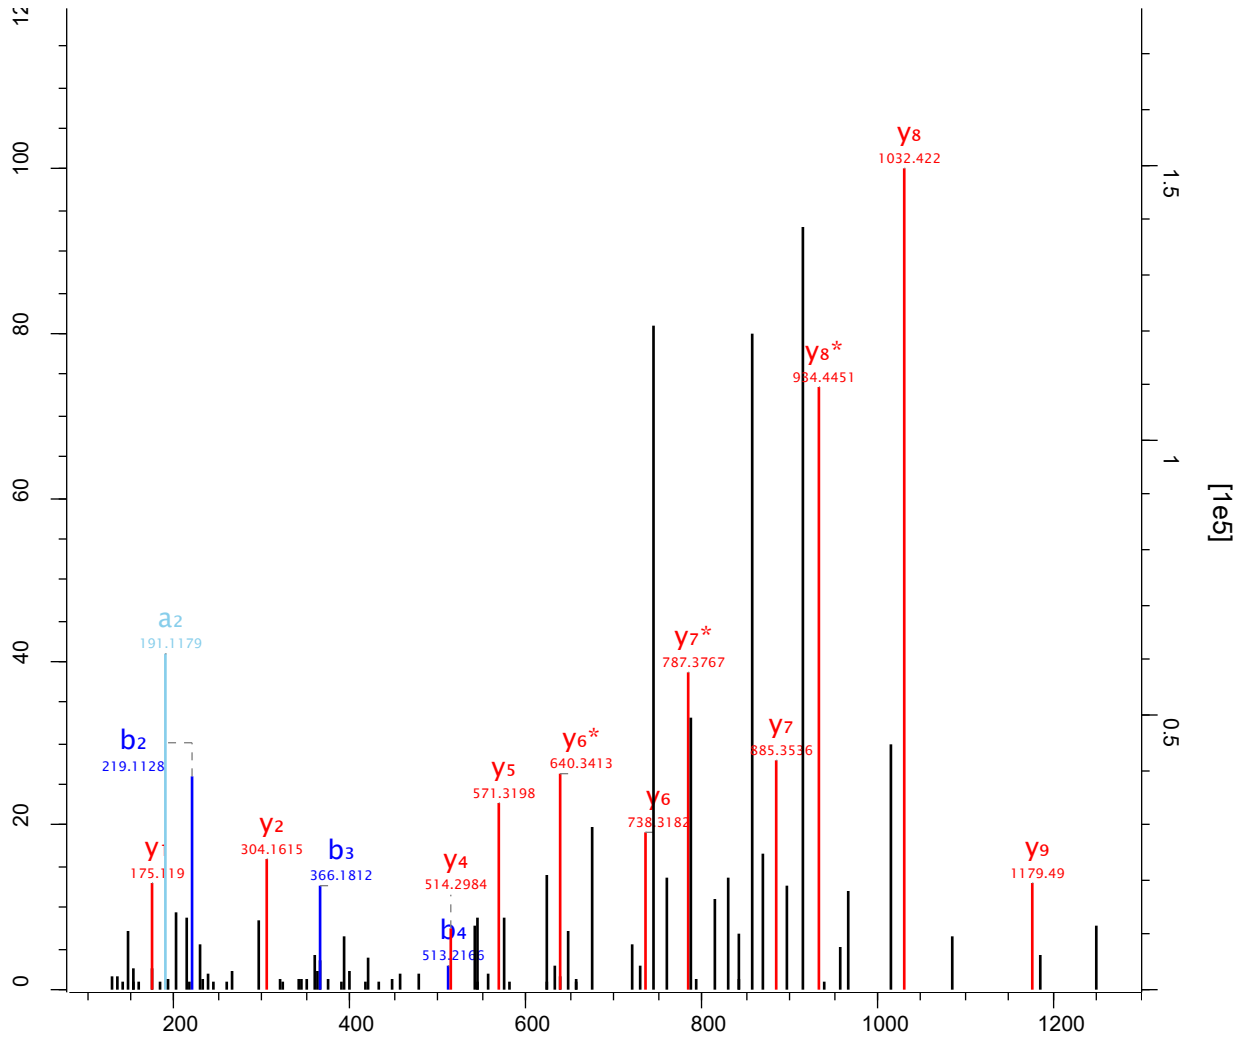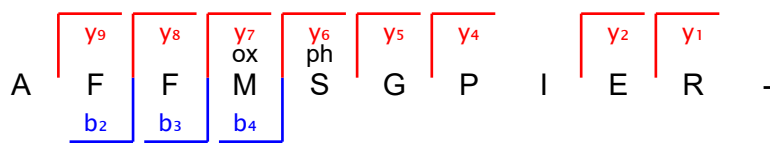

Raw file Scan Method Score m/z  
 sys\_15\_1 2704 FTMS; HCD 70.41 447.7

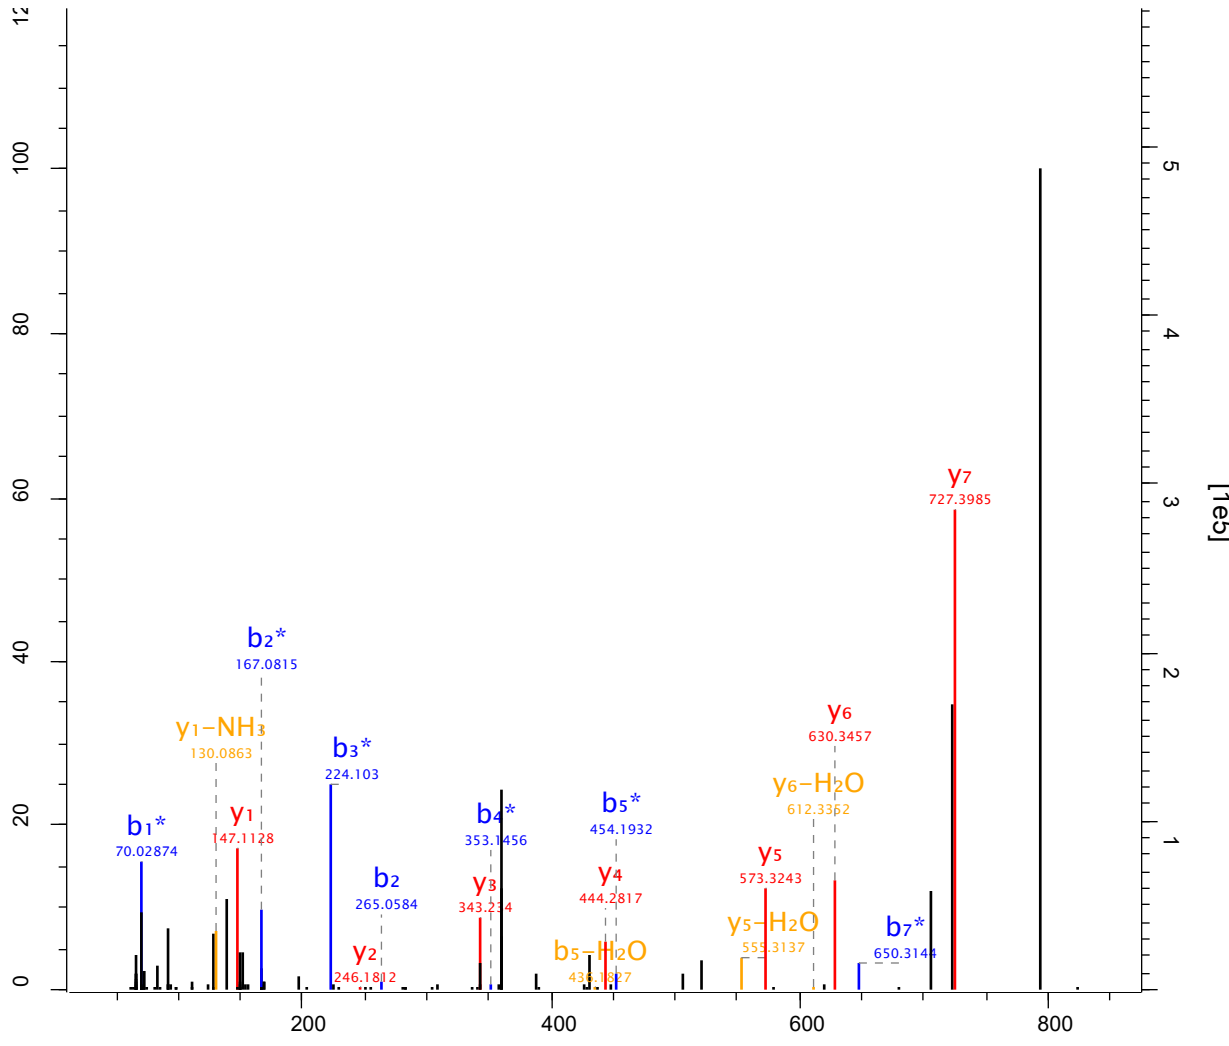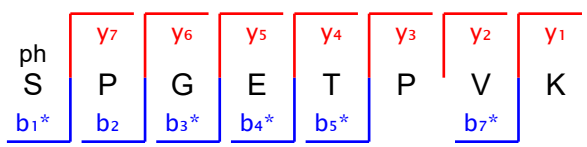

Raw file Scan Method Score m/z  
 sys\_15\_1 27054 FTMS; HCD 86.54 941.93

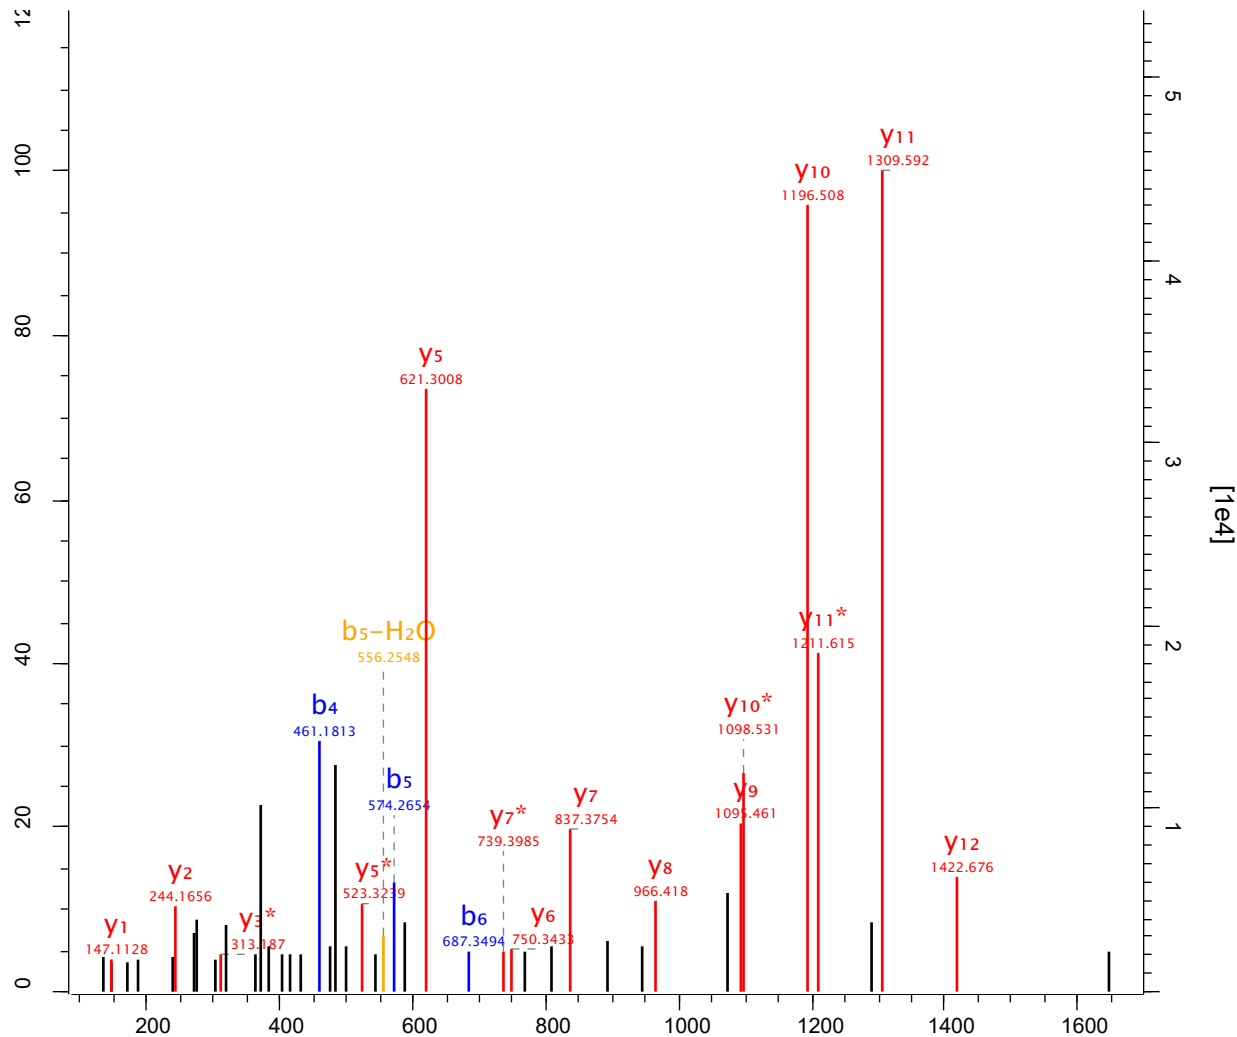

y1  
 K - V S N C I L T E E S E P L S P  
b4 b5 b6 y12 y11 y10 y9 y8 y7 y6 y5 y3\* y2

Raw file Scan Method Score m/z  
 sys\_15\_1 27078 FTMS; HCD 51.03 724.88

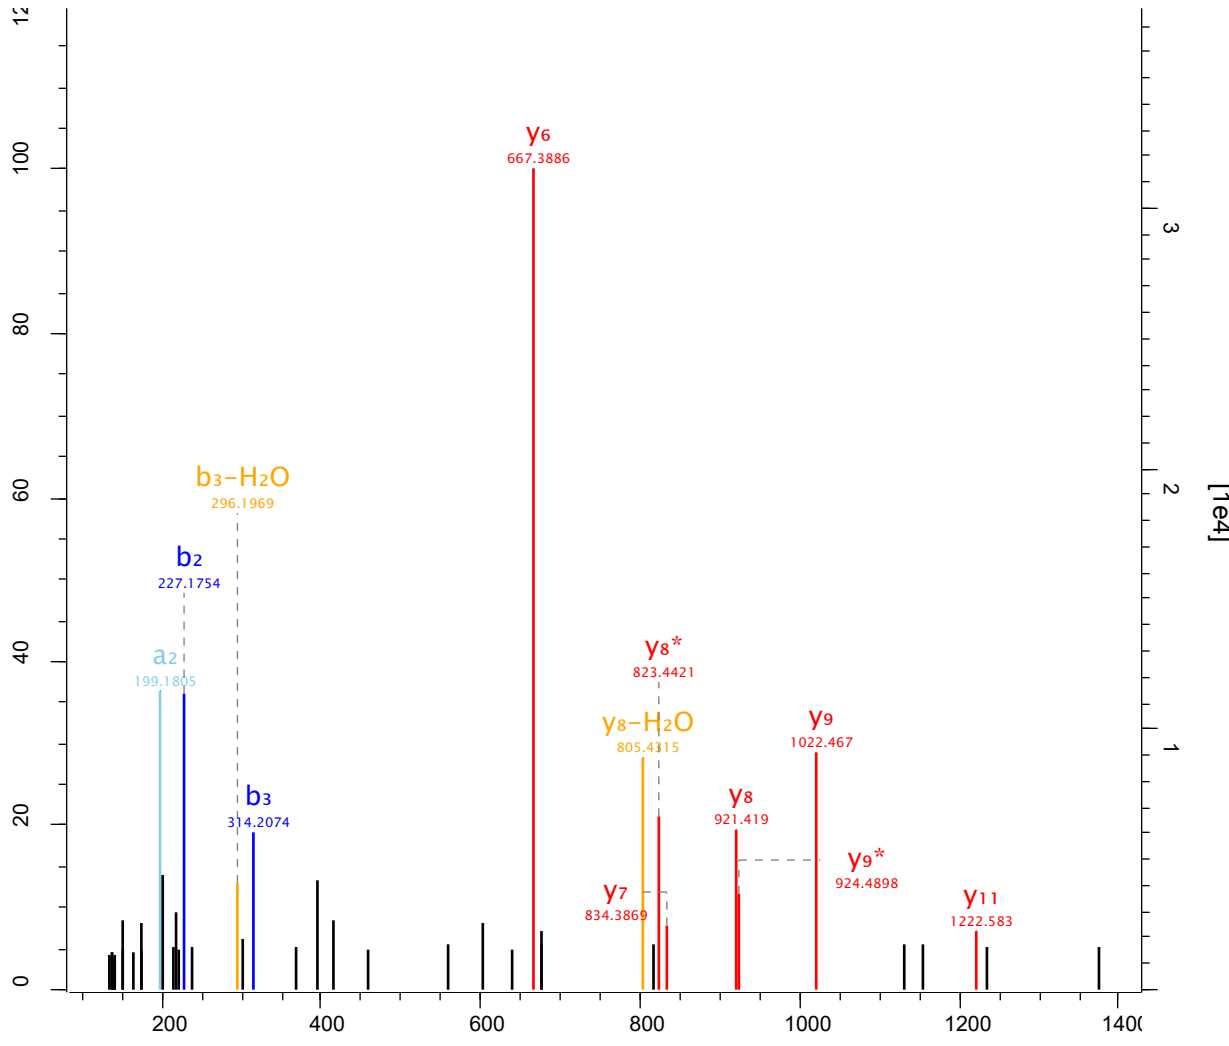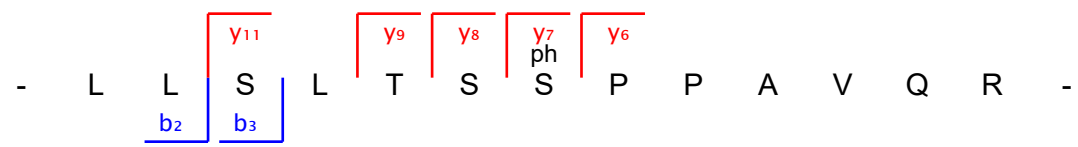

Raw file Scan Method Score m/z  
 sys\_15\_1 27132 FTMS; HCD 178.35 784.68

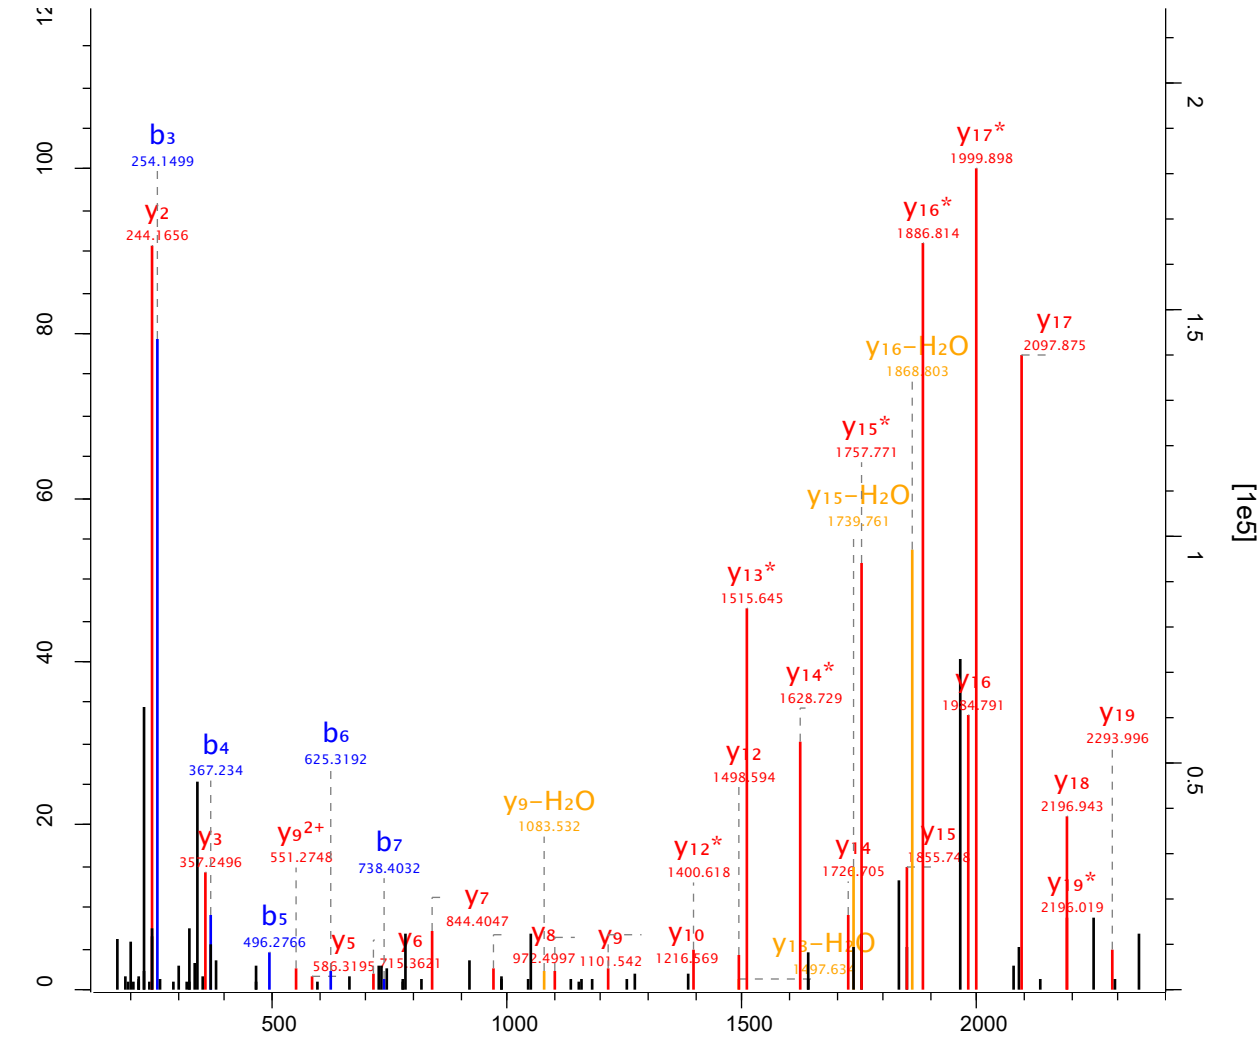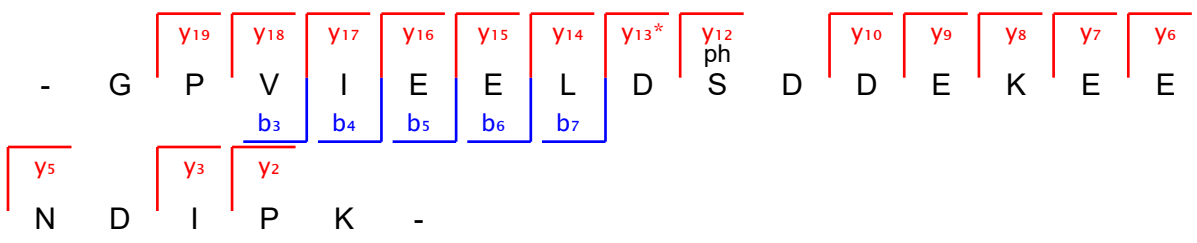

Raw file Scan Method Score m/z  
 sys\_15\_1 27308 FTMS; HCD 86.56 626.62

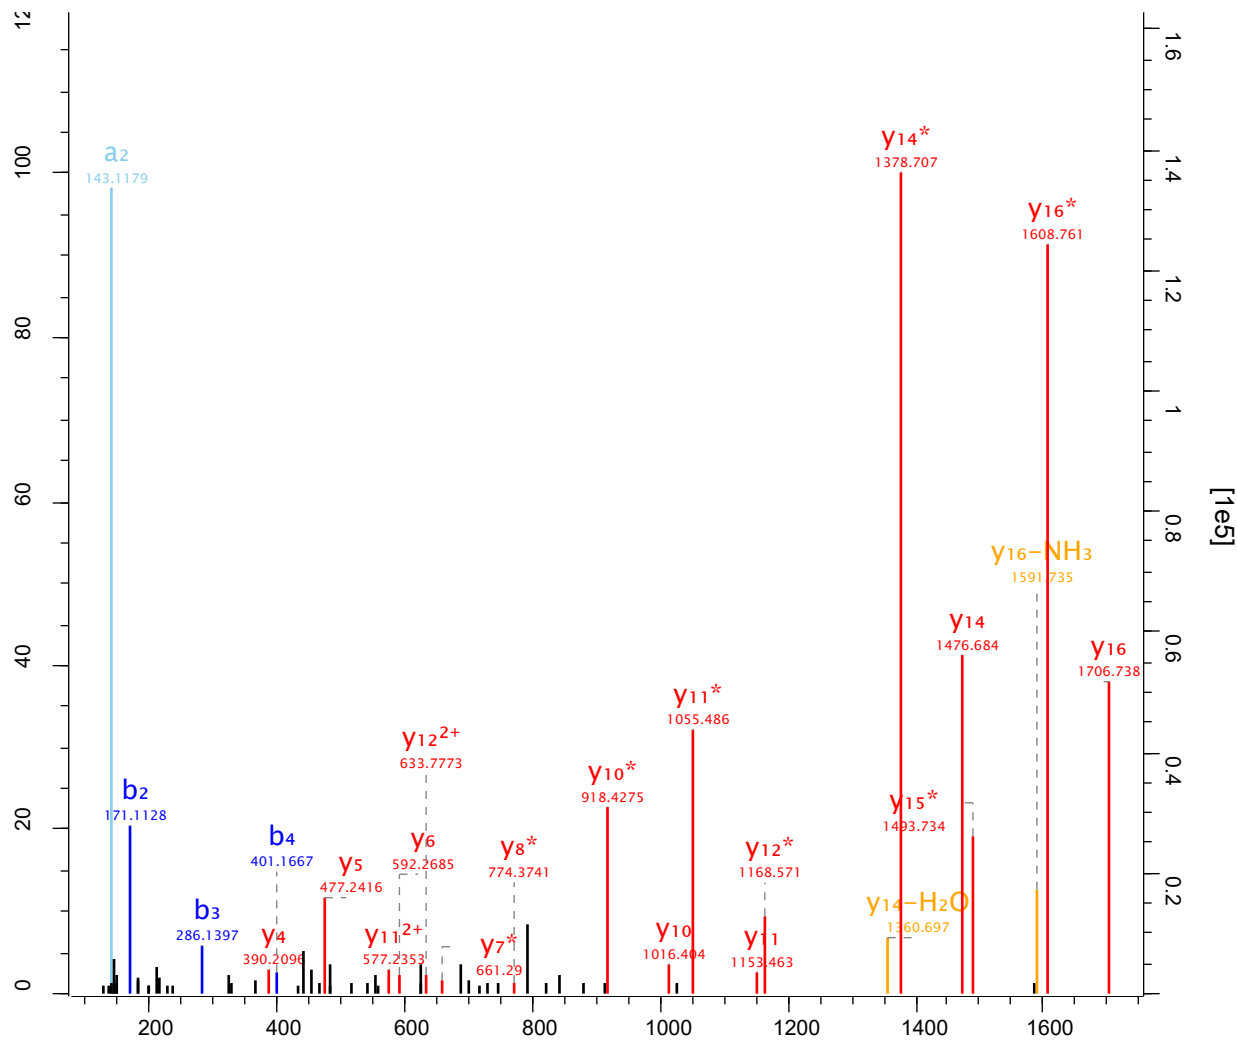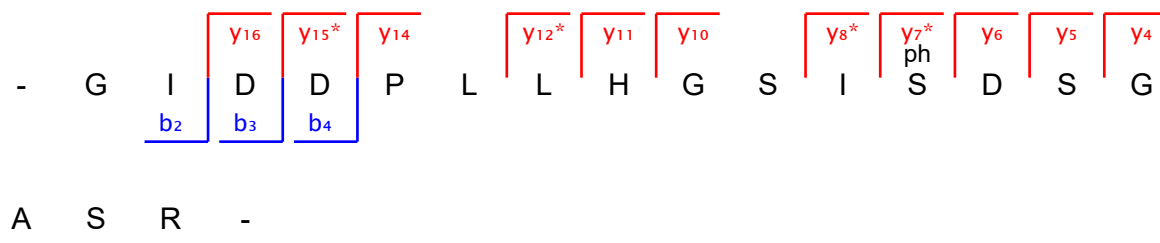

Raw file Scan Method Score m/z  
 sys\_15\_1 27335 FTMS; HCD 40.86 1031.08

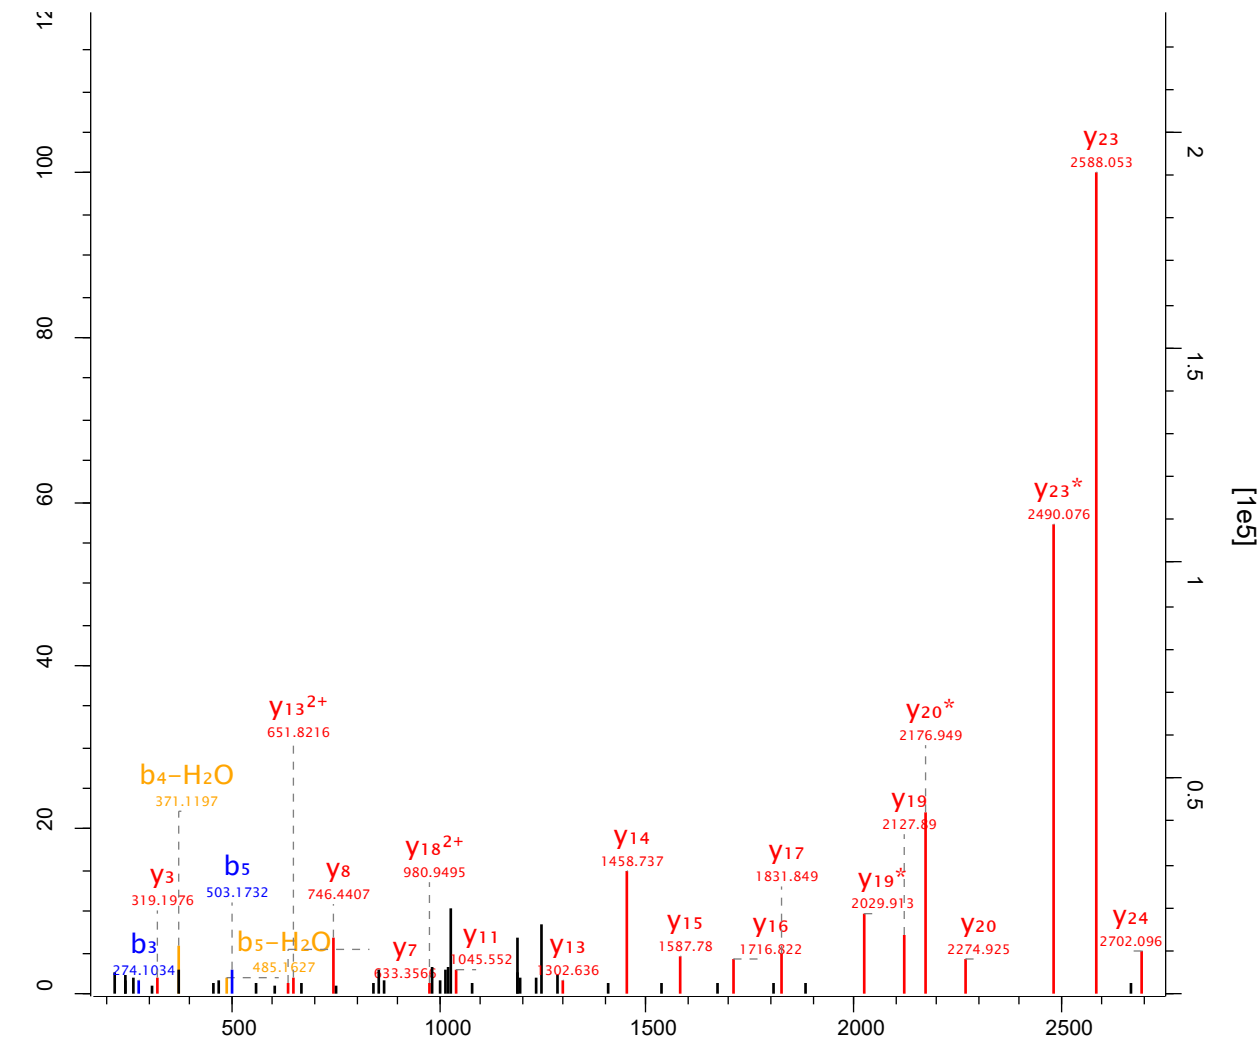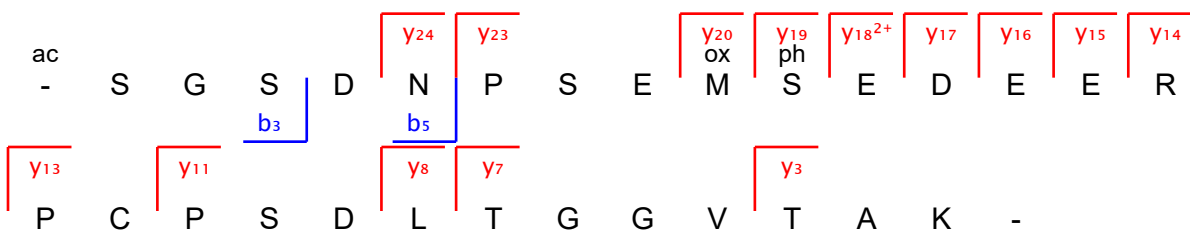



Raw file Scan Method Score m/z  
 sys\_15\_1 2737 FTMS; HCD 59.07 497.69

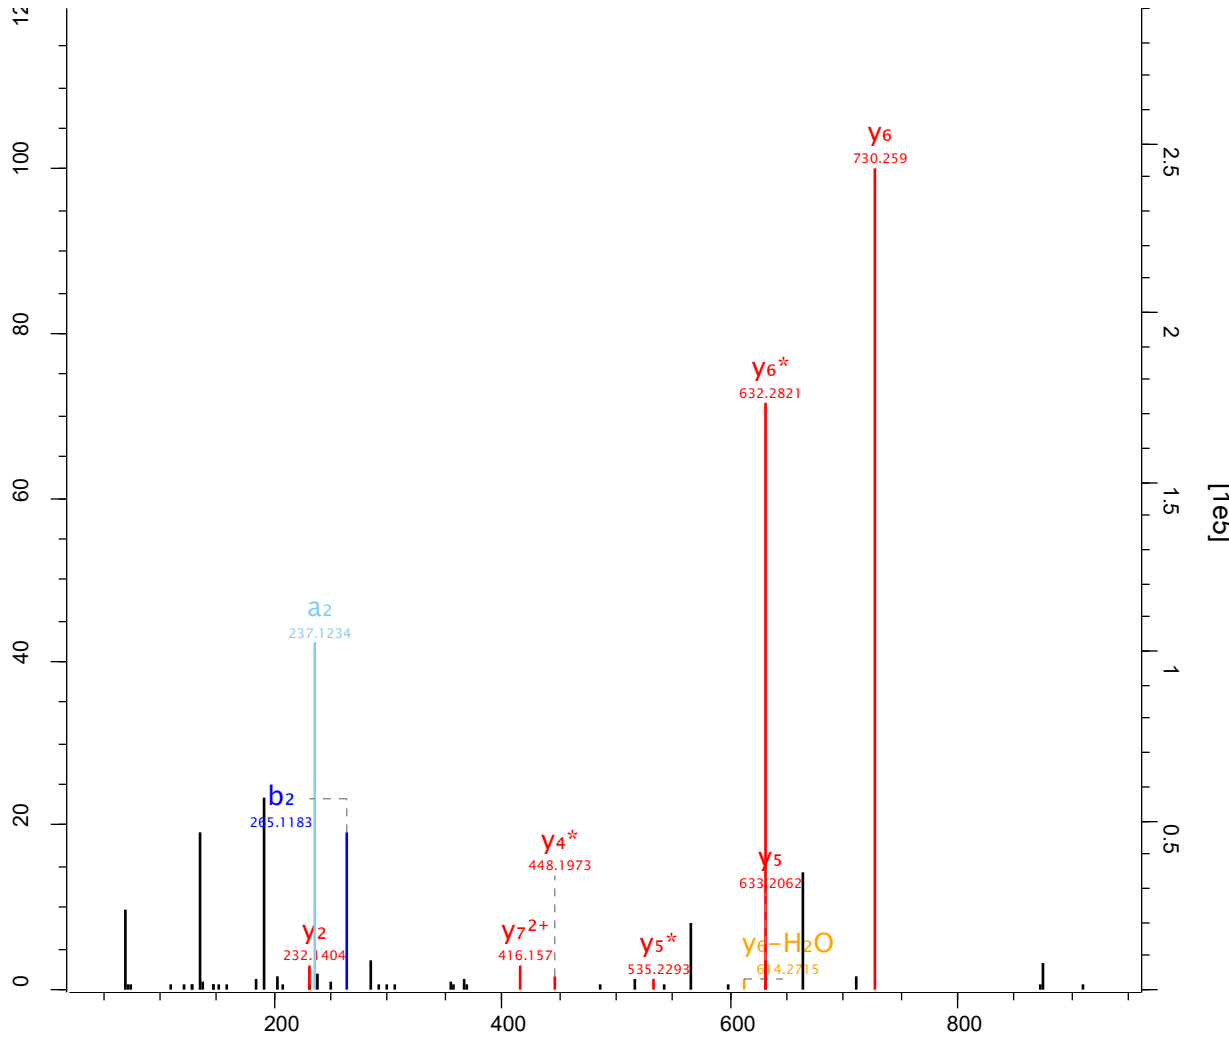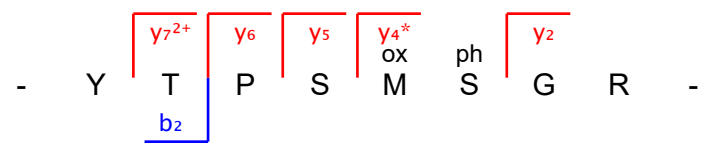

Raw file Scan Method Score m/z  
 sys\_15\_1 27442 FTMS; HCD 94.38 709.68

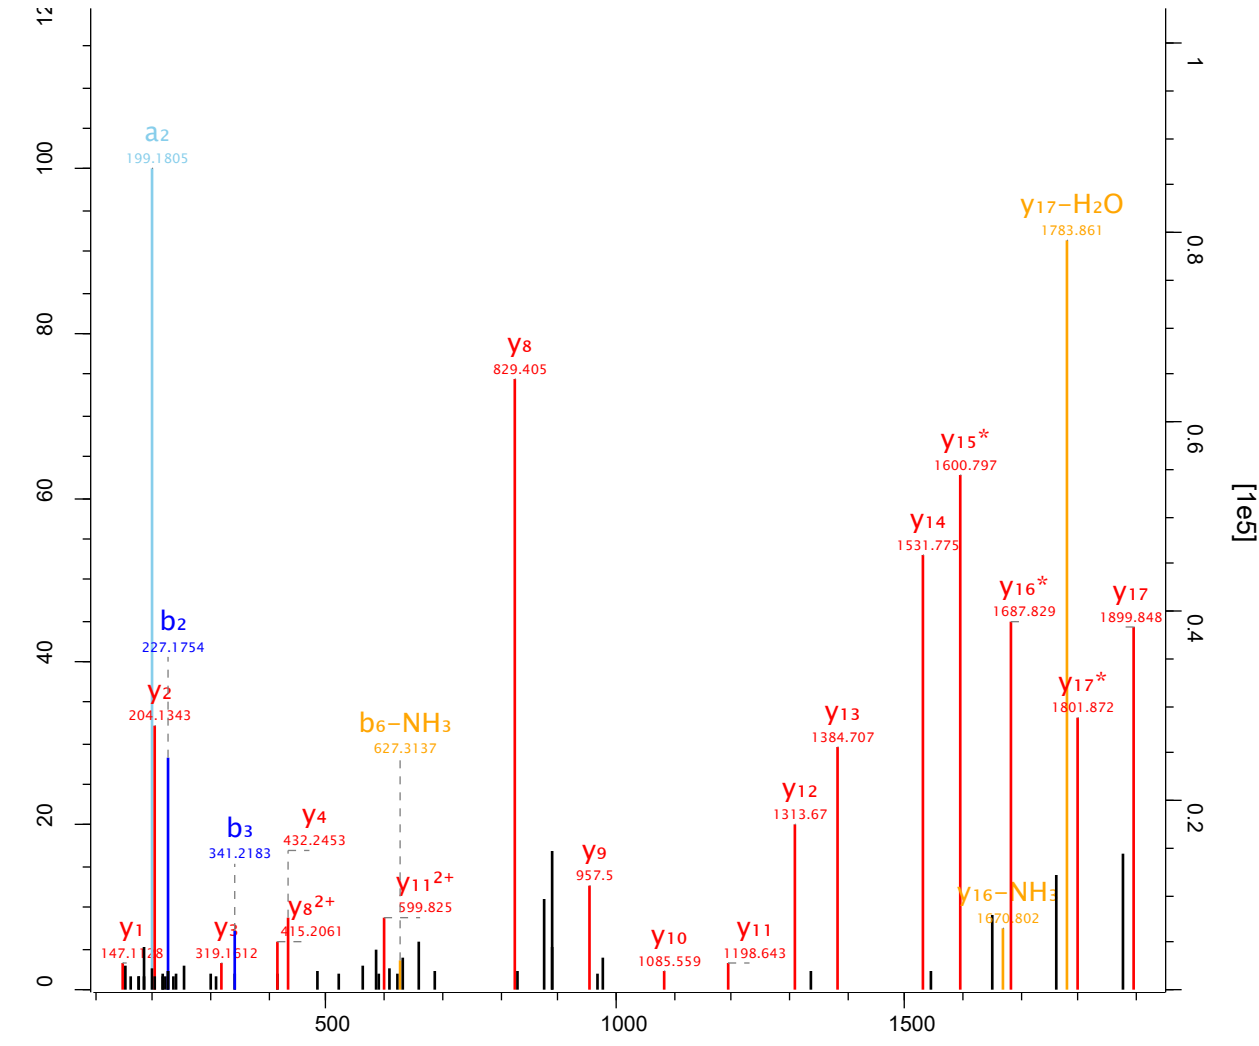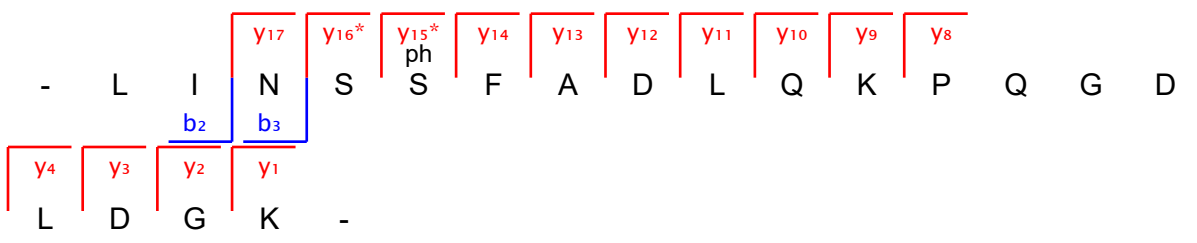

Raw file Scan Method Score m/z  
 sys\_15\_1 27502 FTMS; HCD 149.71 896.89

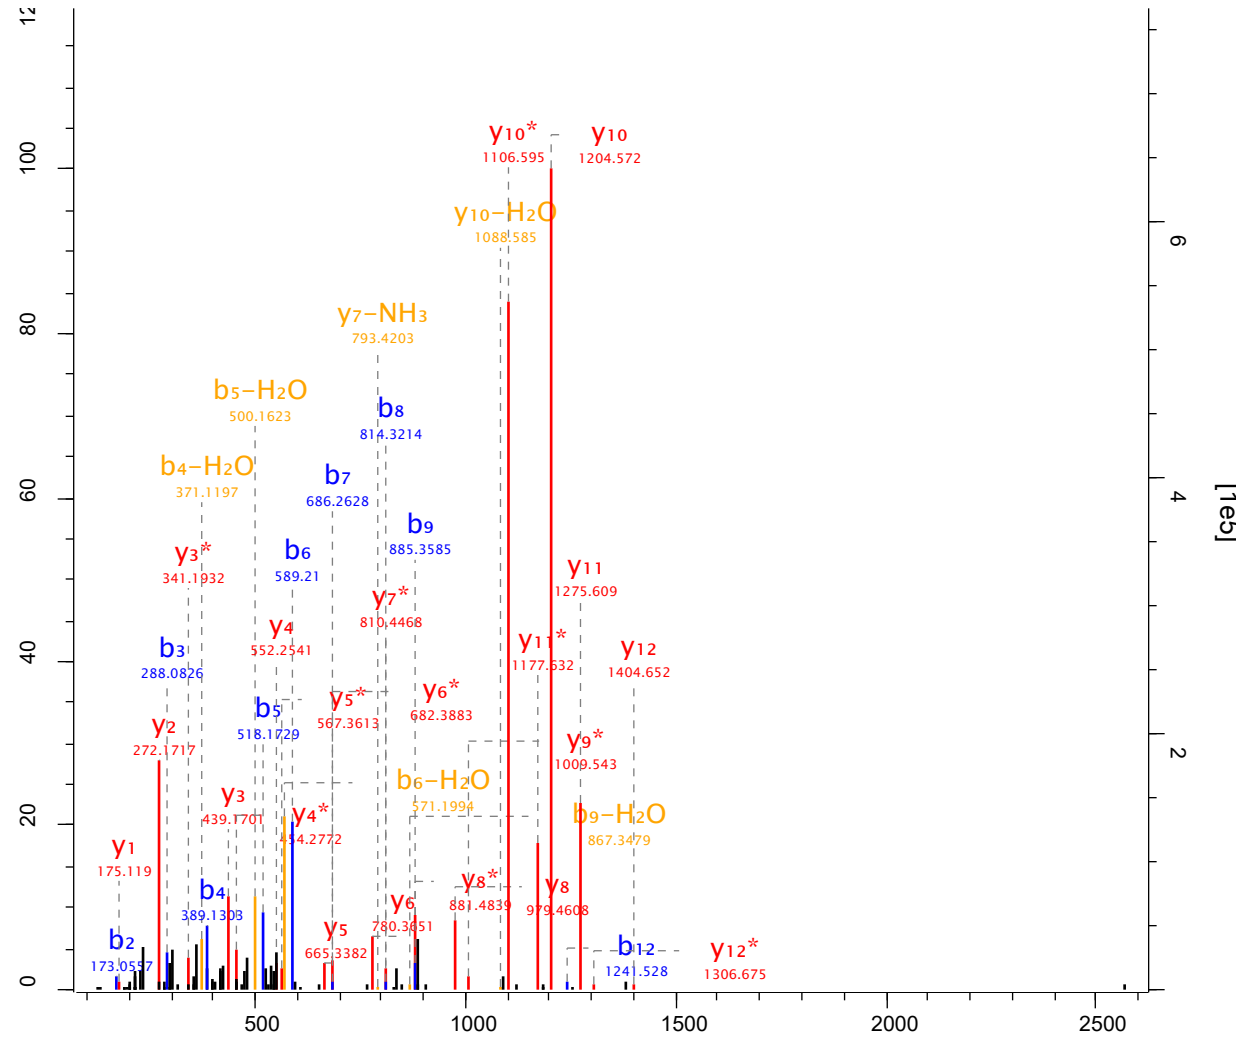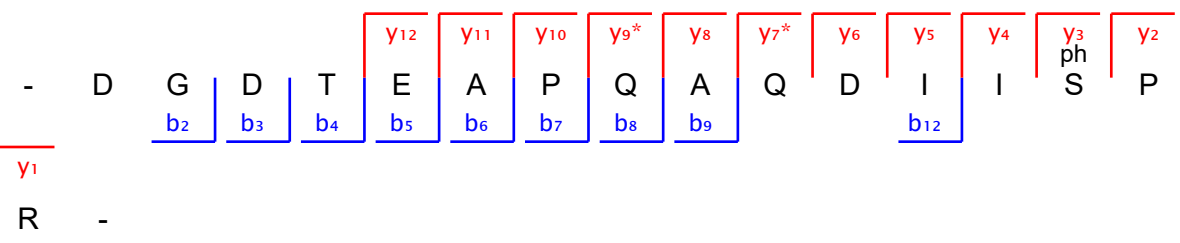

Raw file Scan Method Score m/z  
 sys\_15\_1 27569 FTMS; HCD 172.98 954.93

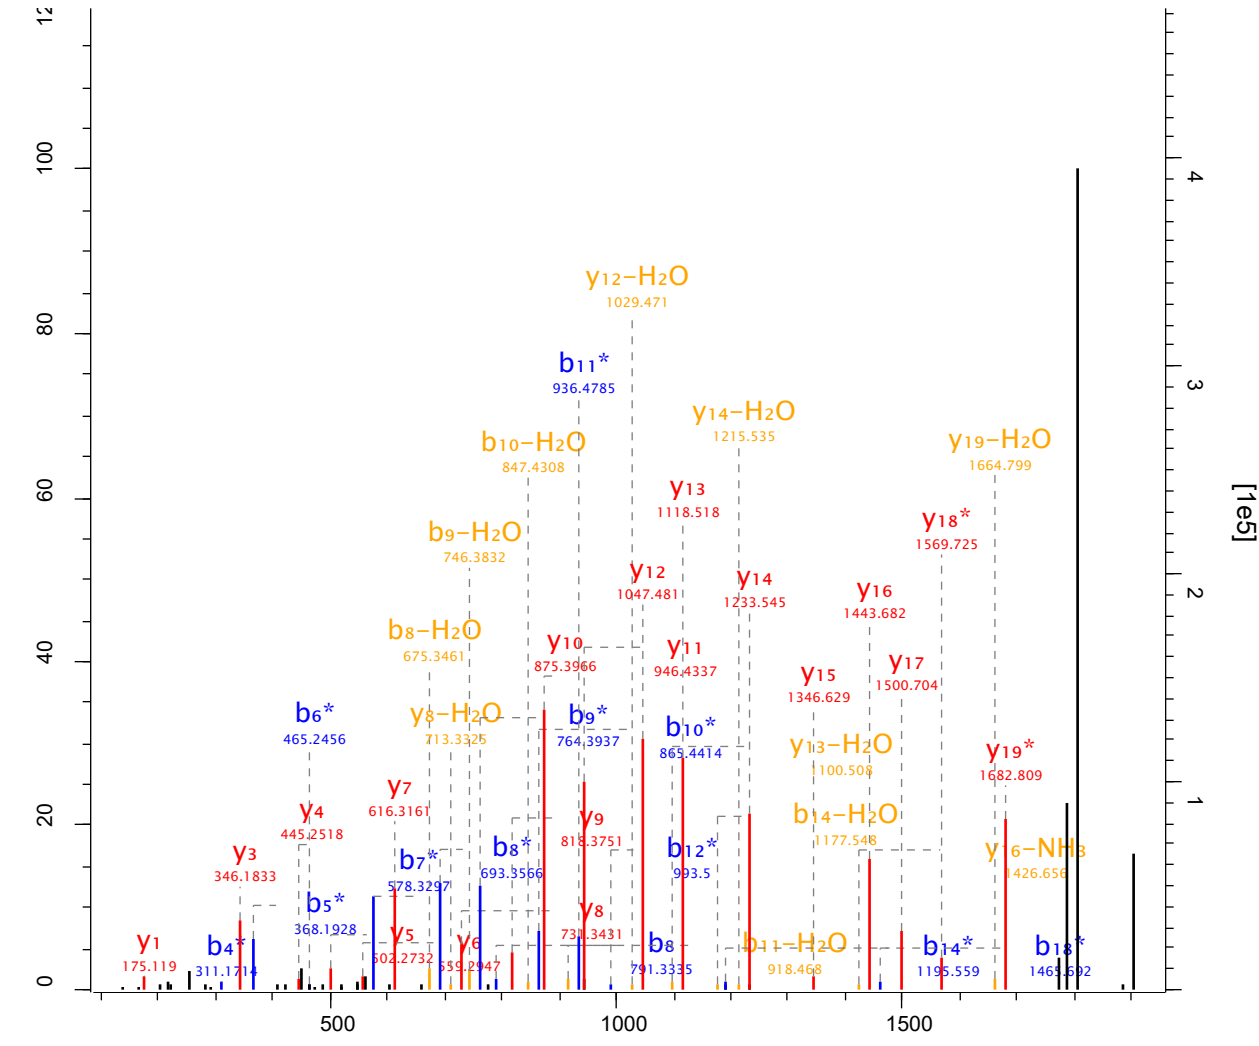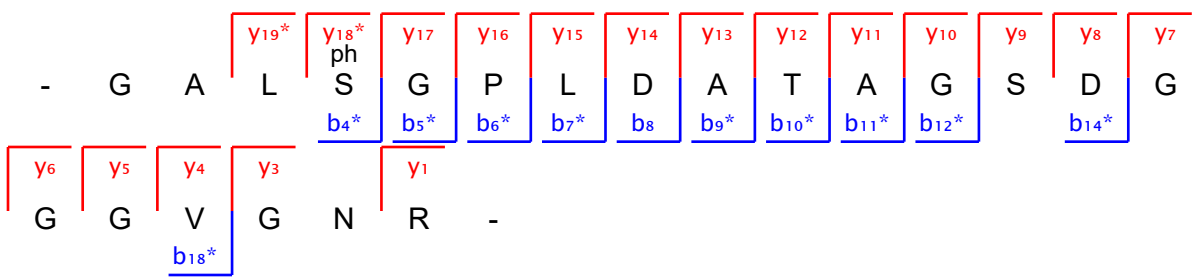

Raw file Scan Method Score m/z  
 sys\_15\_1 27604 FTMS; HCD 82.07 596.77

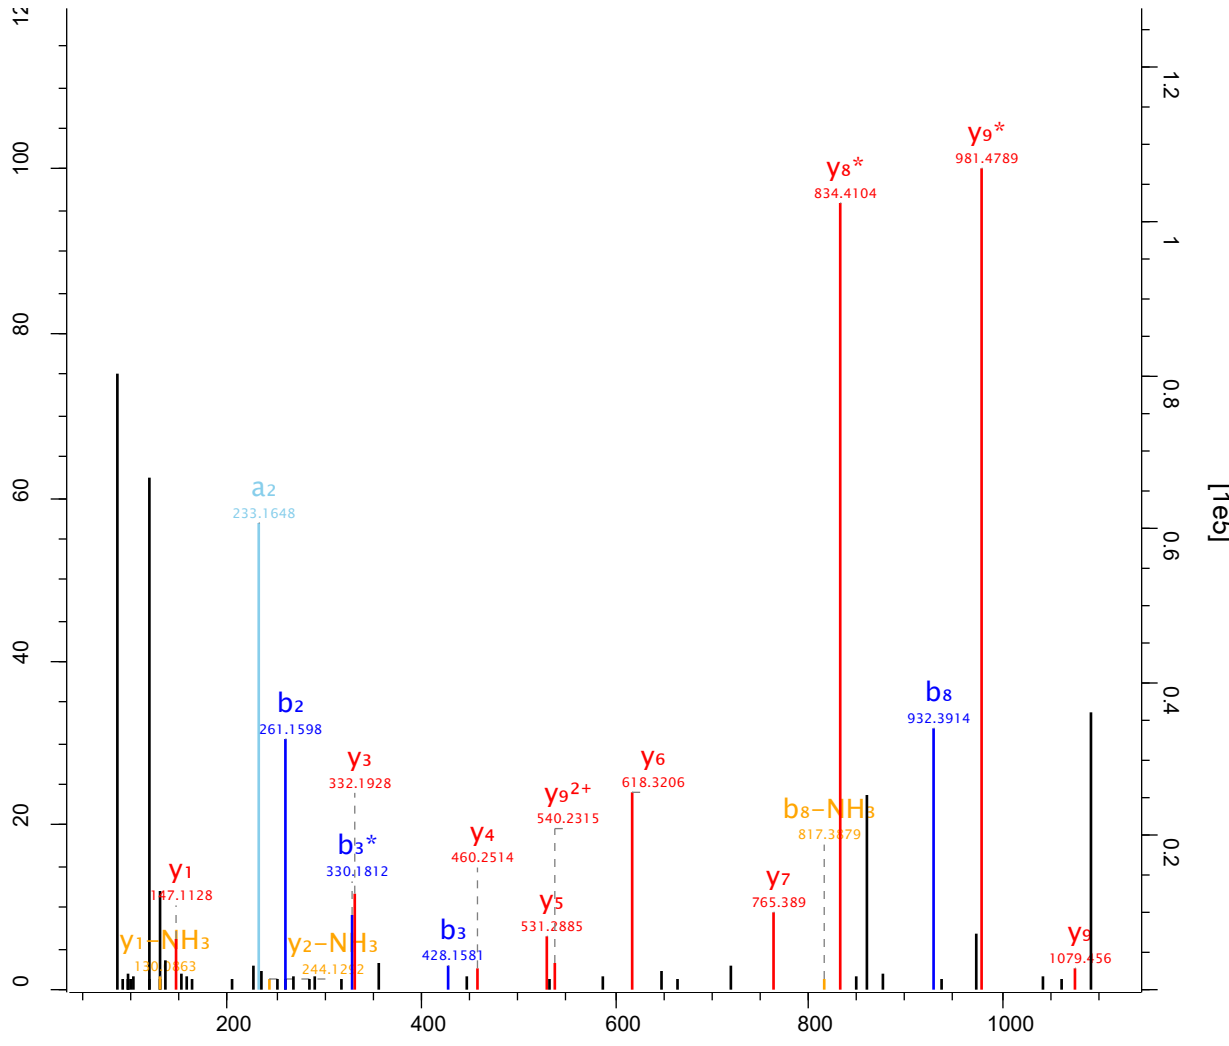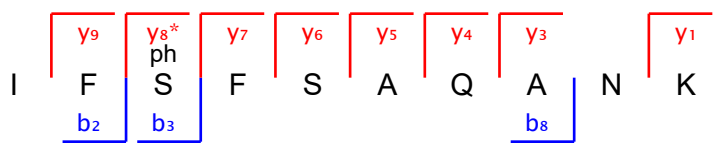

Raw file Scan Method Score m/z  
 sys\_15\_1 27623 FTMS; HCD 139.78 444.71

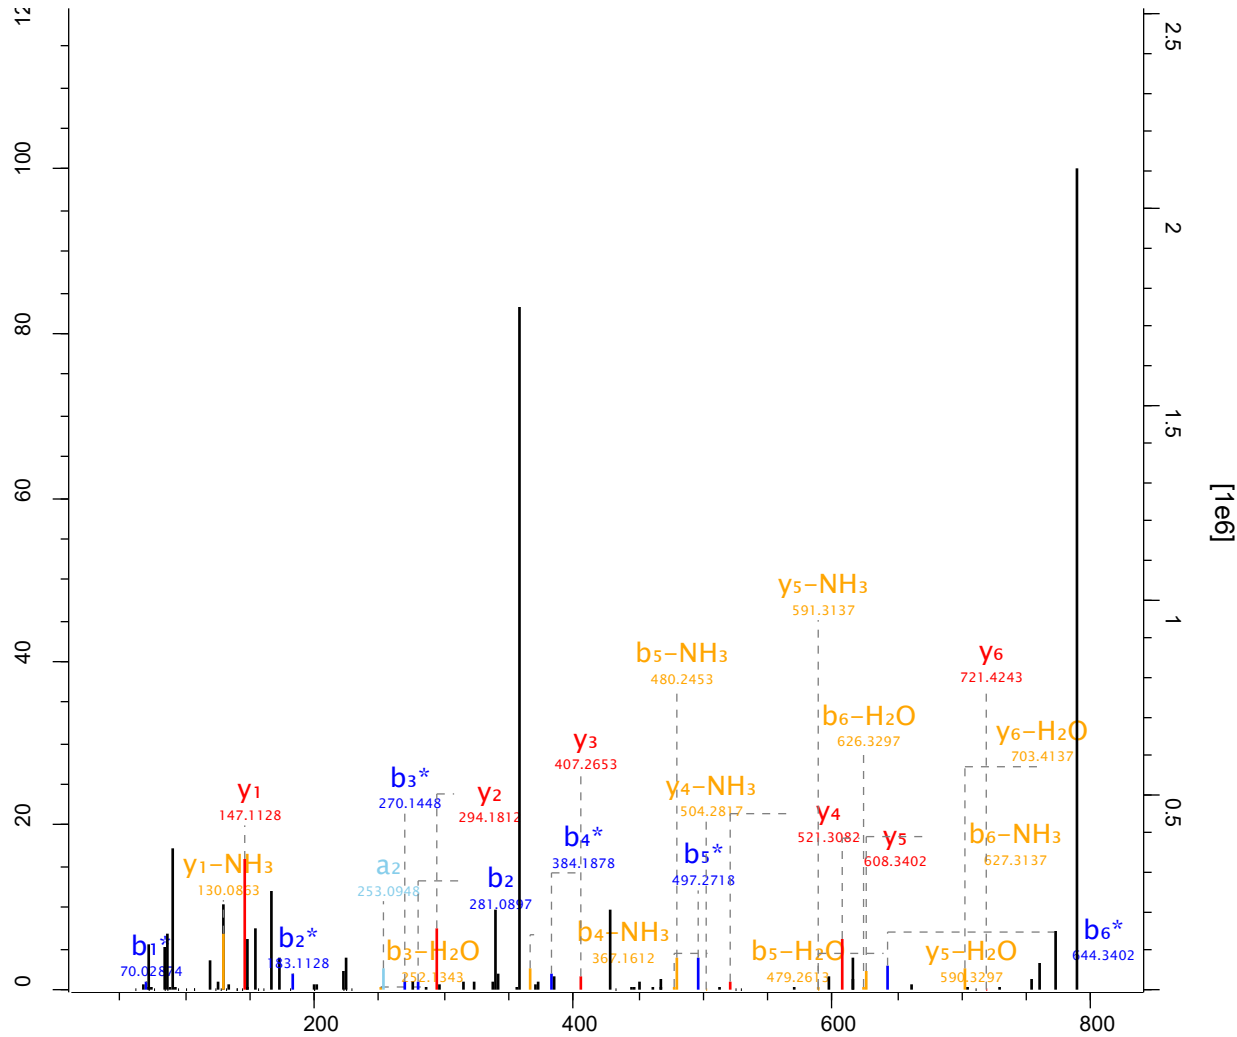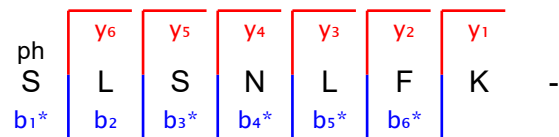

Raw file Scan Method Score m/z  
 sys\_15\_1 27796 FTMS; HCD 60.49 693.82

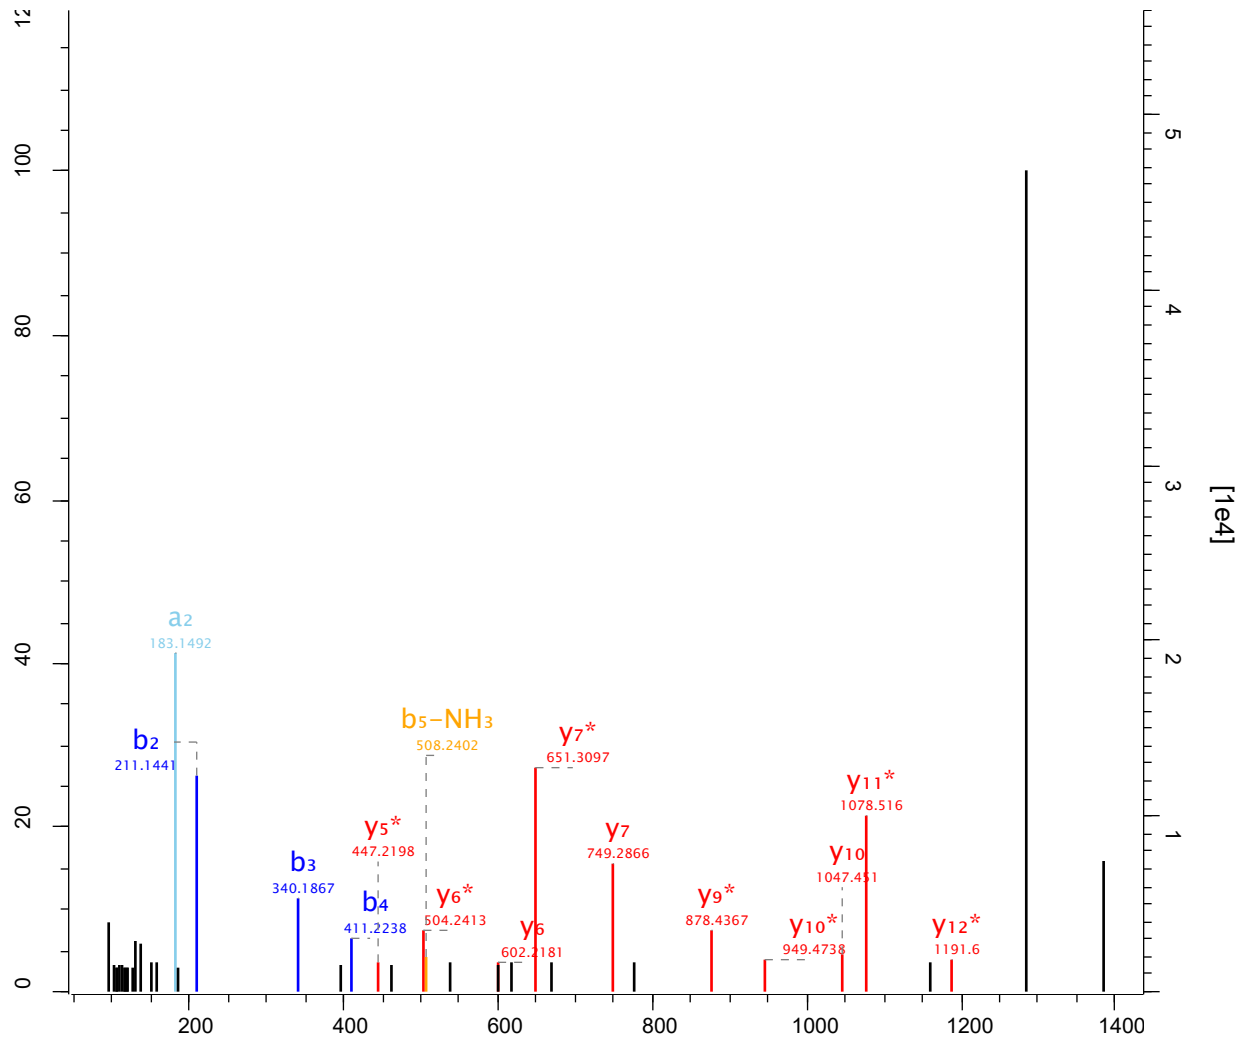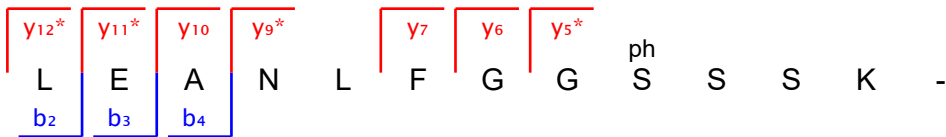

Raw file Scan Method Score m/z  
 sys\_15\_1 27899 FTMS; HCD 110.26 961.91

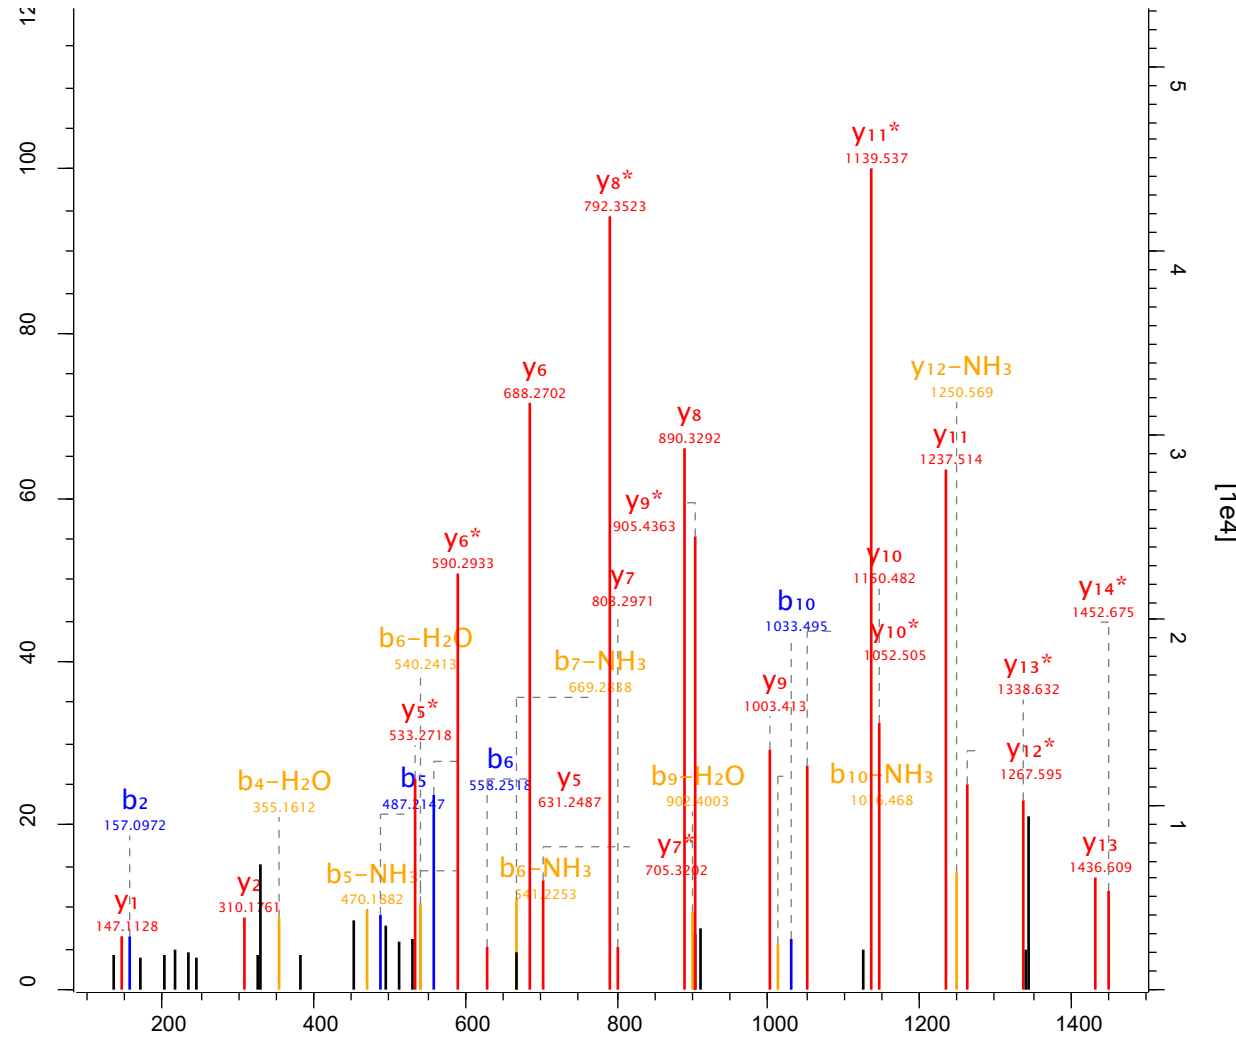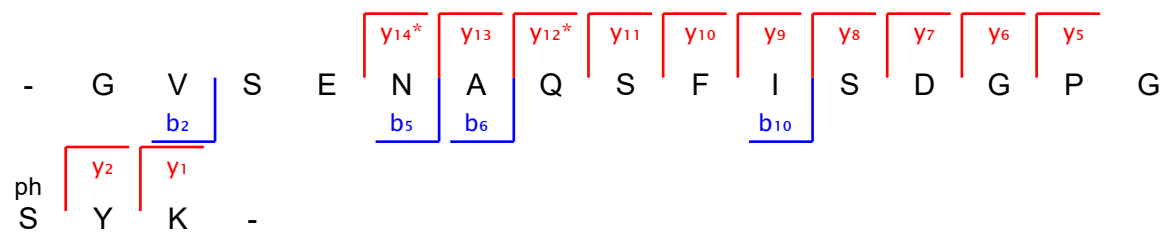



Raw file Scan Method Score m/z  
 sys\_15\_1 27936 FTMS; HCD 77.22 740.02

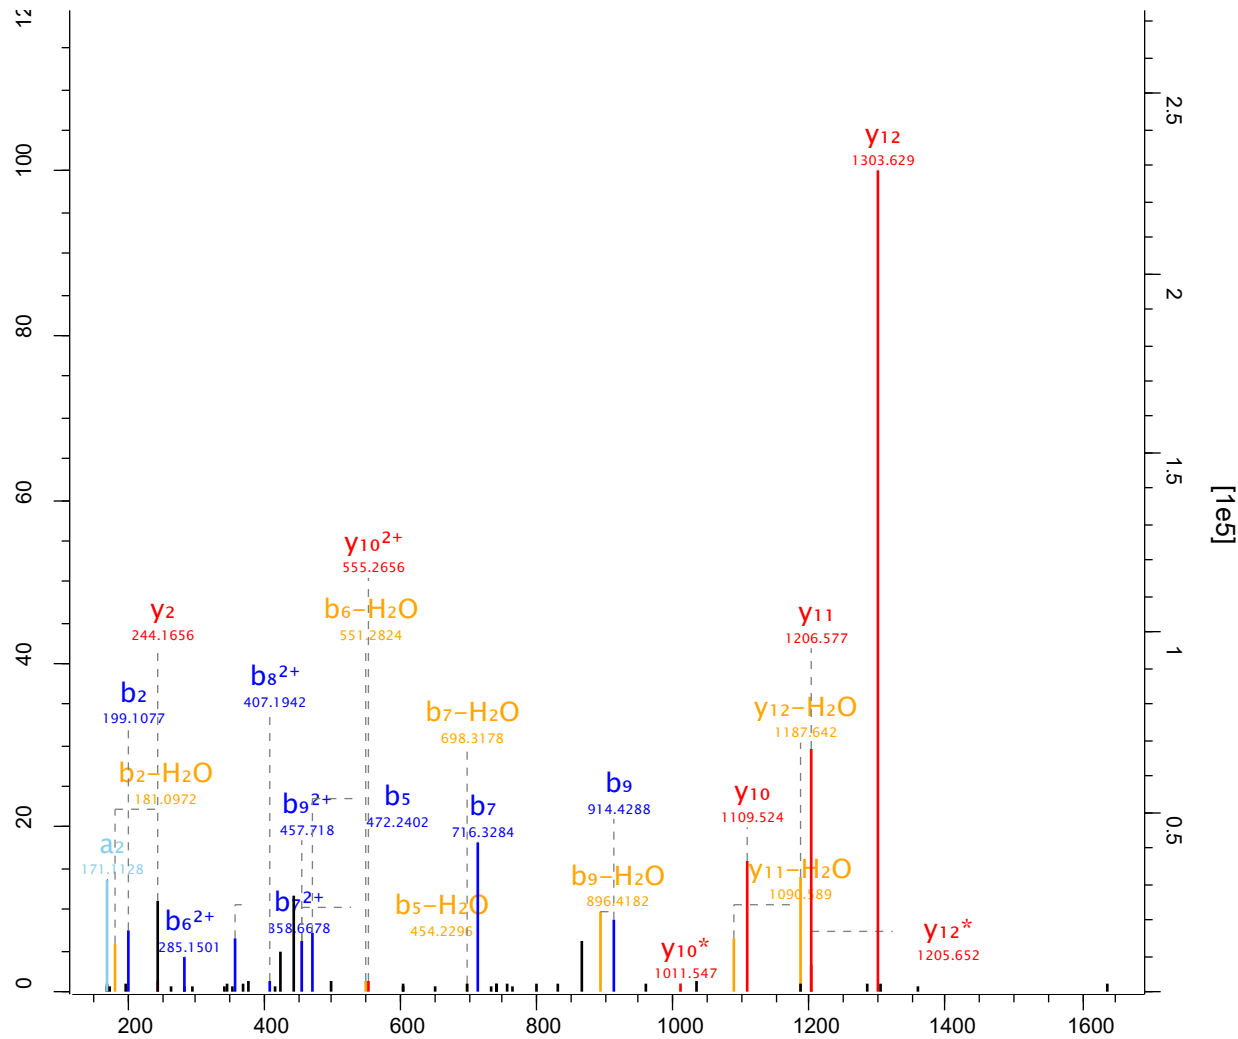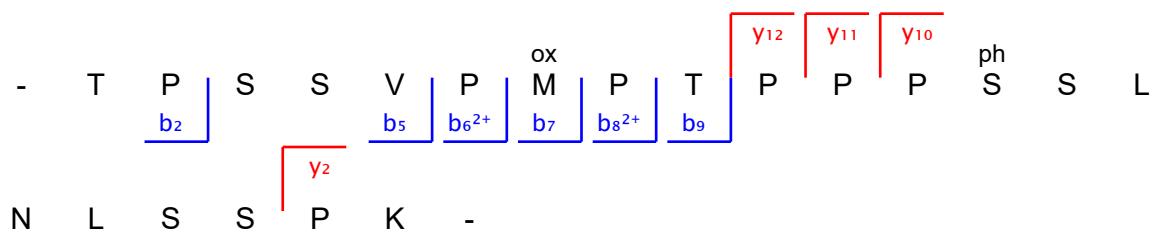

Raw file Scan Method Score m/z  
 sys\_15\_1 27985 FTMS; HCD 49.66 667.34

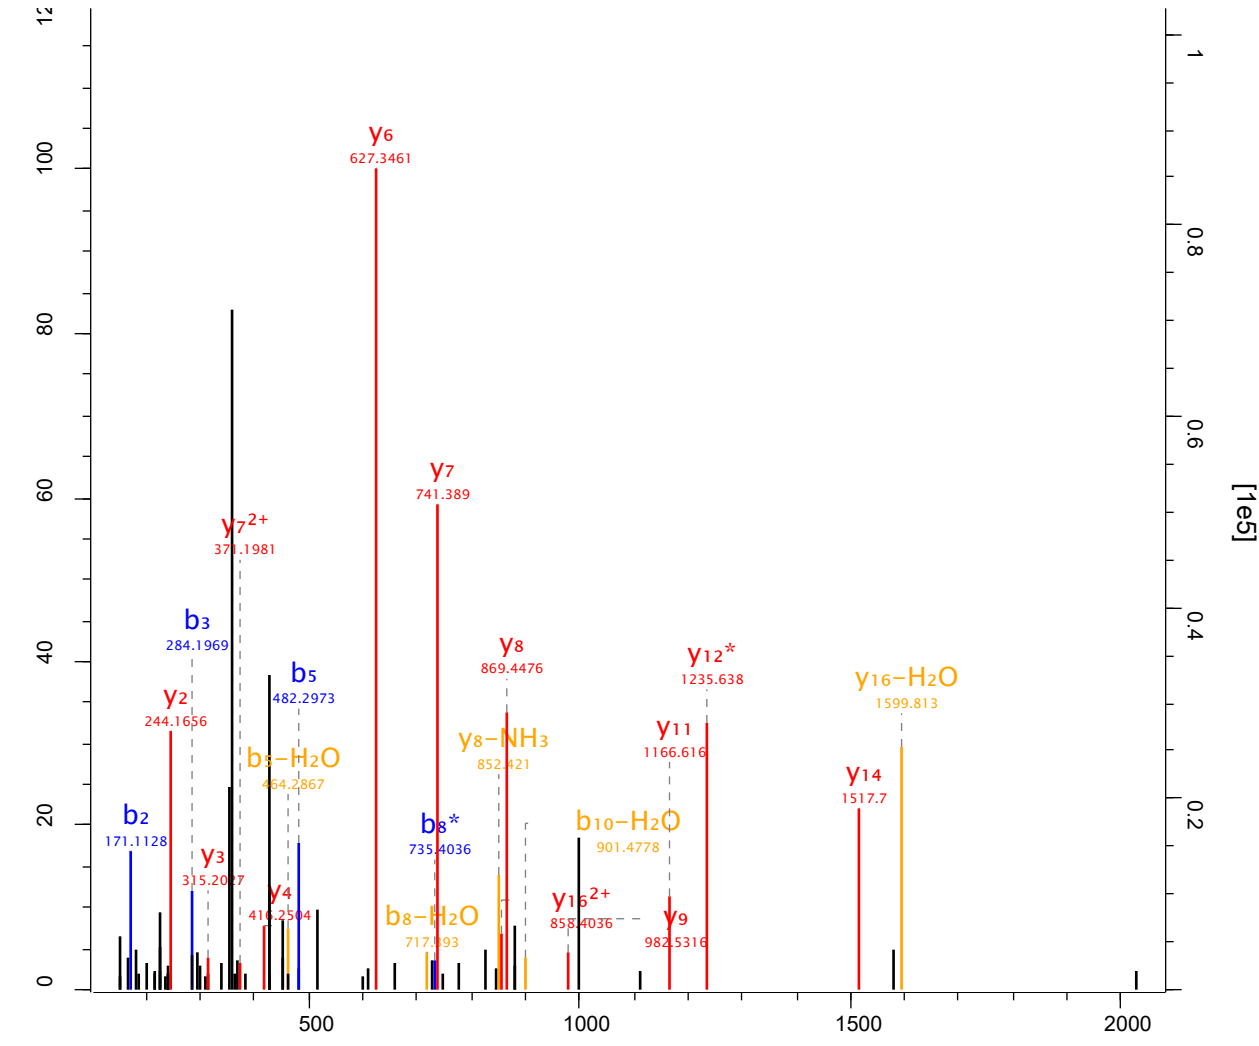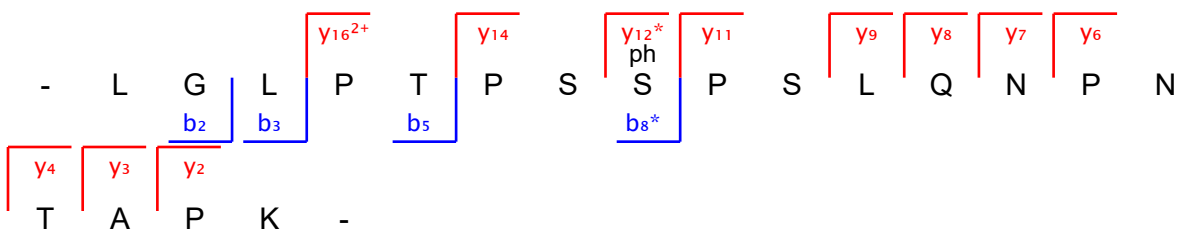

Raw file Scan Method Score m/z  
 sys\_15\_1 28118 FTMS; HCD 105.46 587.26

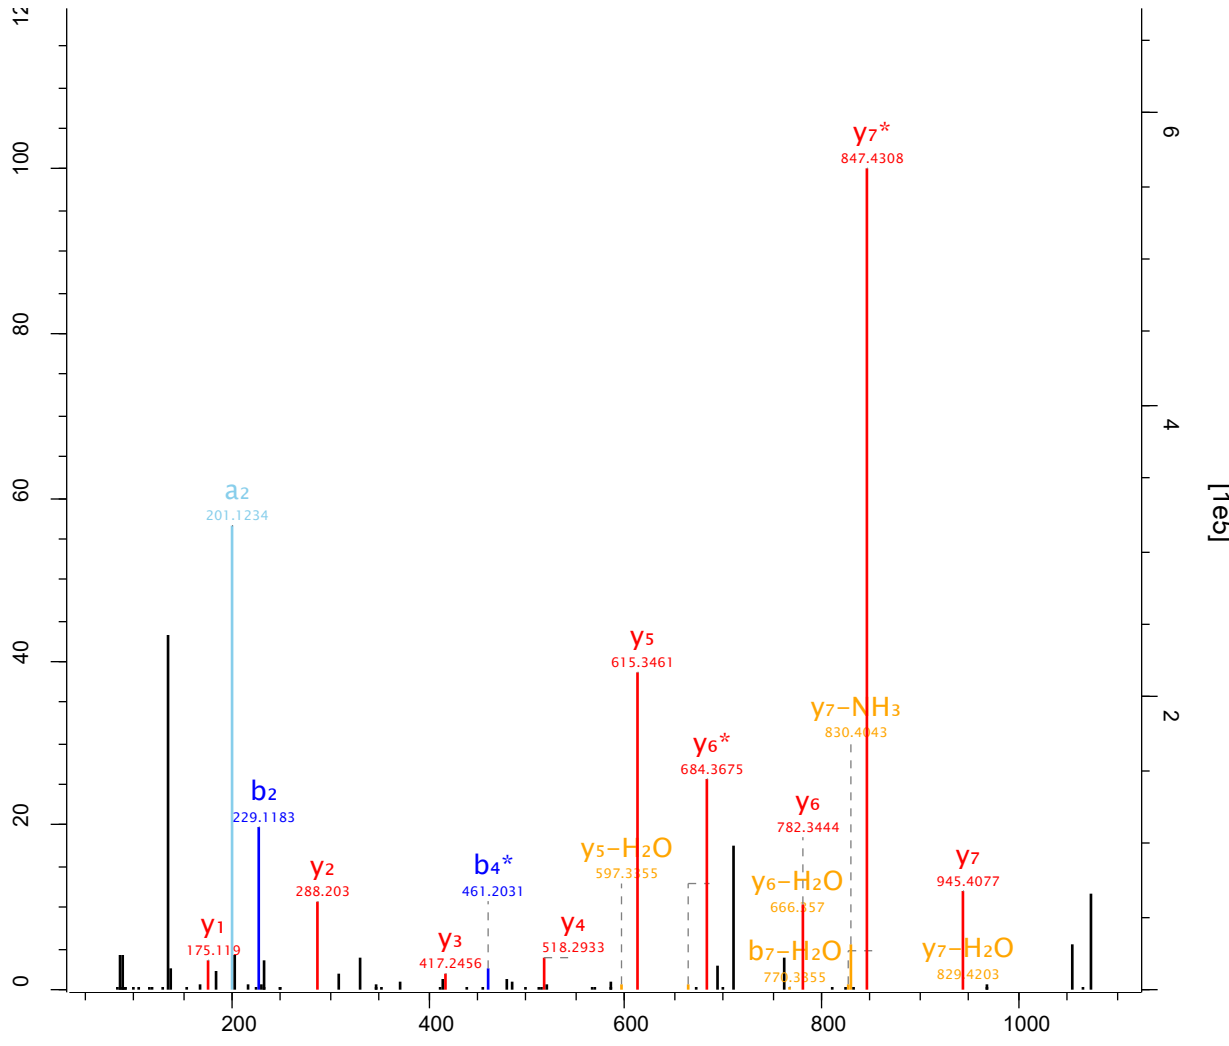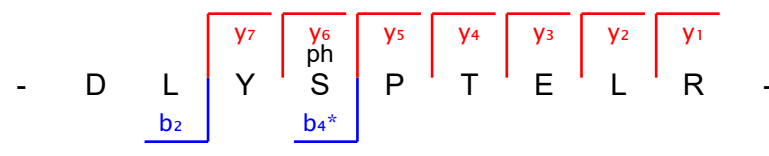

Raw file Scan Method Score m/z  
 sys\_15\_1 28139 FTMS; HCD 50.5 792.35

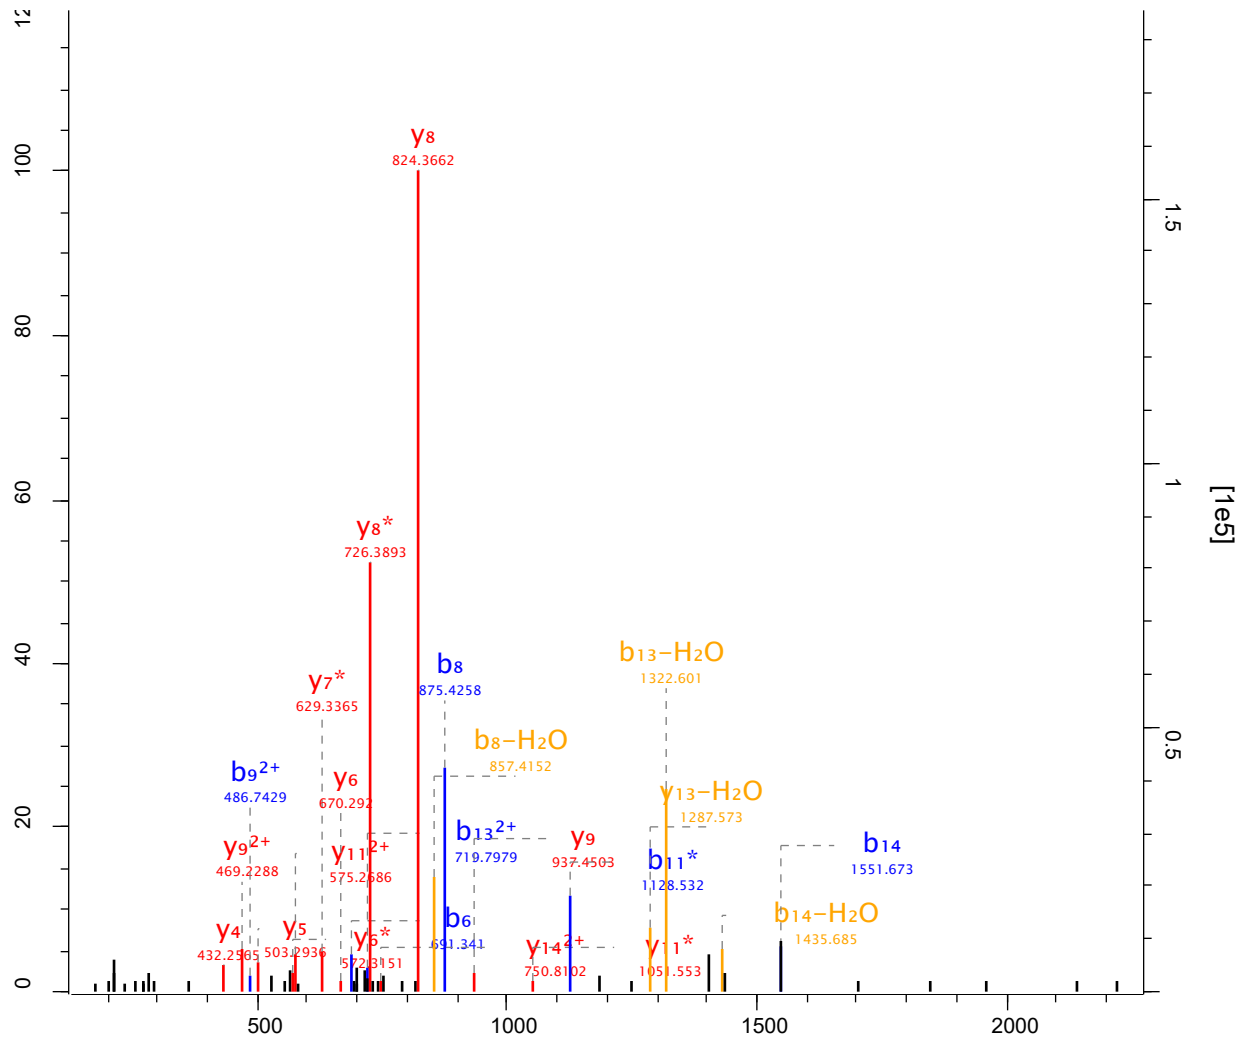

- V L E H P D P S P S ph S P D L P  
 b6 b8 b9 2+ b11\* b13 2+ b14 y14 2+ y11\* y9 y8  
 y7\* y6 ph y5 y4  
 G S A G S L R -

Raw file Scan Method Score m/z  
 sys\_15\_1 28290 FTMS; HCD 204.17 709.8

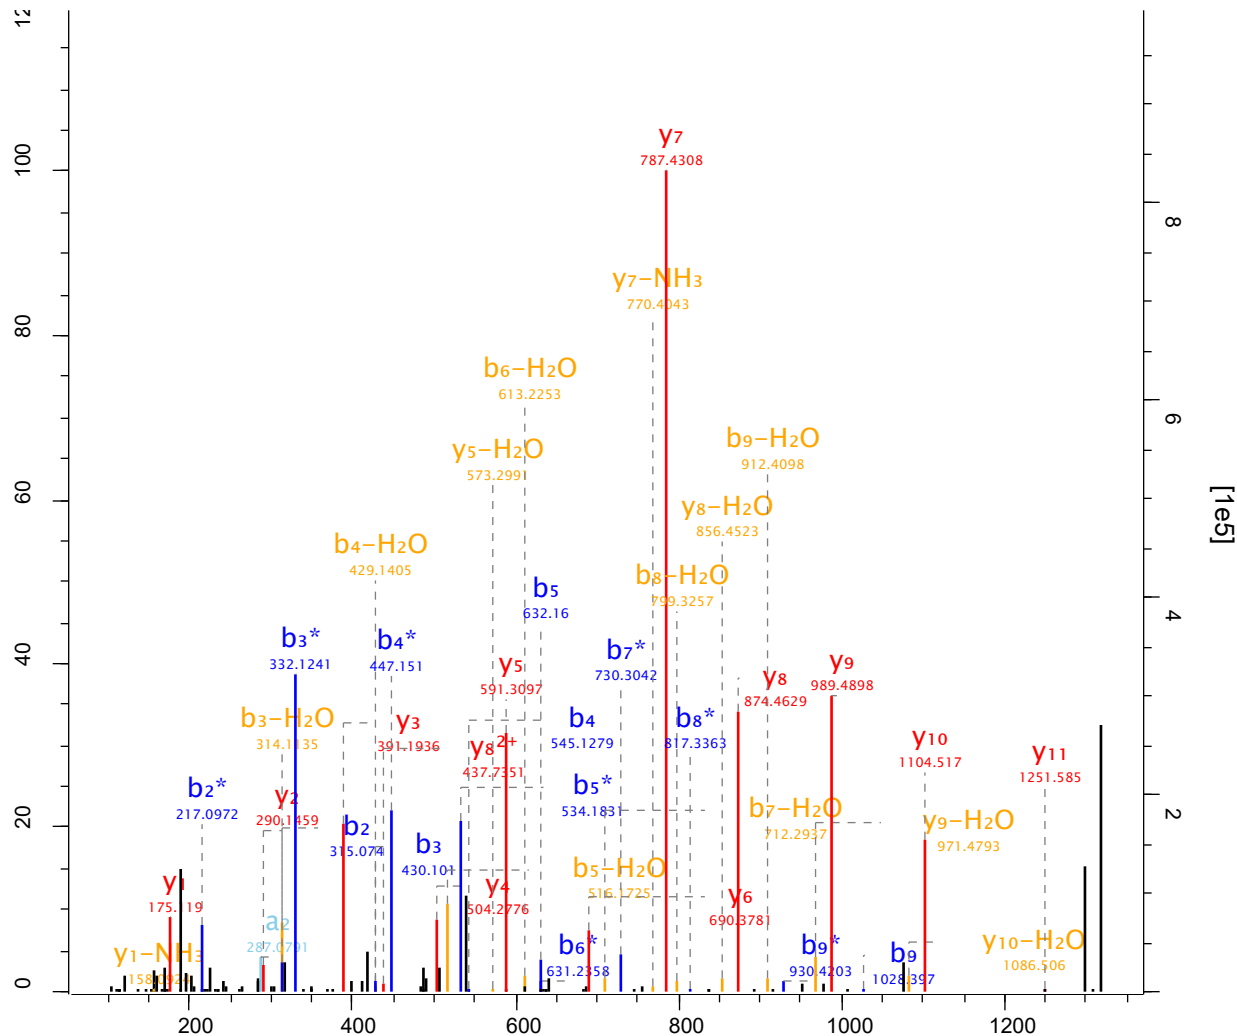

ph S 

|     |     |    |    |     |     |     |    |    |    |    |
|-----|-----|----|----|-----|-----|-----|----|----|----|----|
| y11 | y10 | y9 | y8 | y7  | y6  | y5  | y4 | y3 | y2 | y1 |
| F   | D   | D  | S  | P   | V   | S   | I  | T  | D  | R  |
| b2  | b3  | b4 | b5 | b6* | b7* | b8* | b9 |    |    |    |

Raw file Scan Method Score m/z  
 sys\_15\_1 28328 FTMS; HCD 131.35 694.81

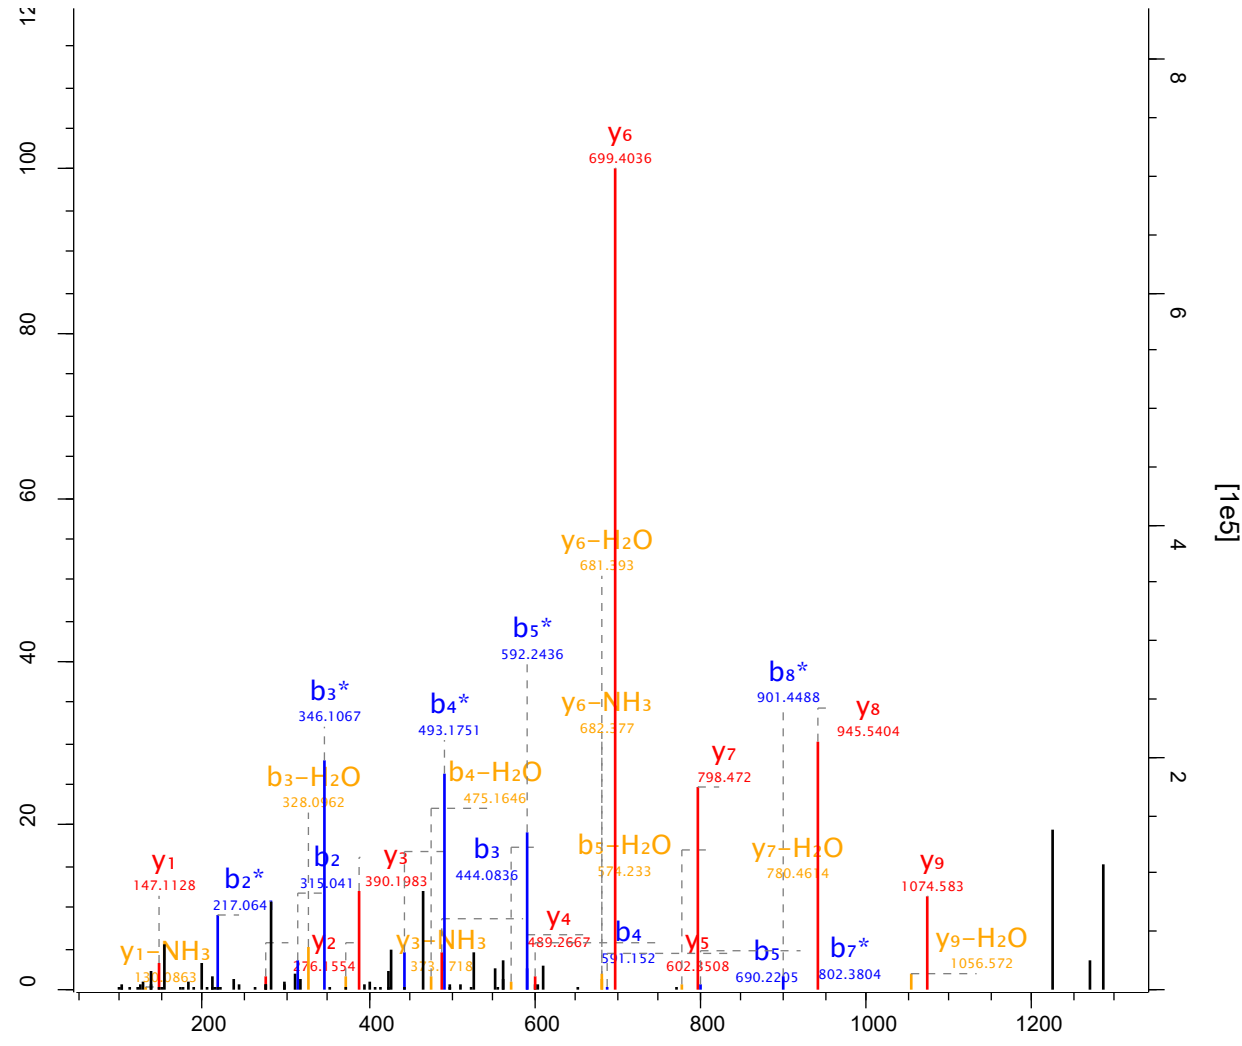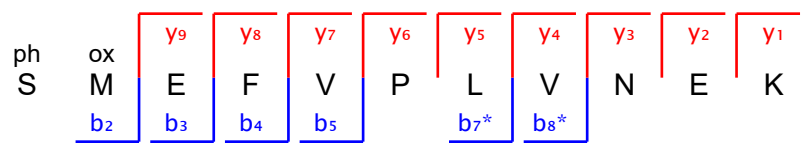

Raw file Scan Method Score m/z  
 sys\_15\_1 28403 FTMS; HCD 173.09 801.38

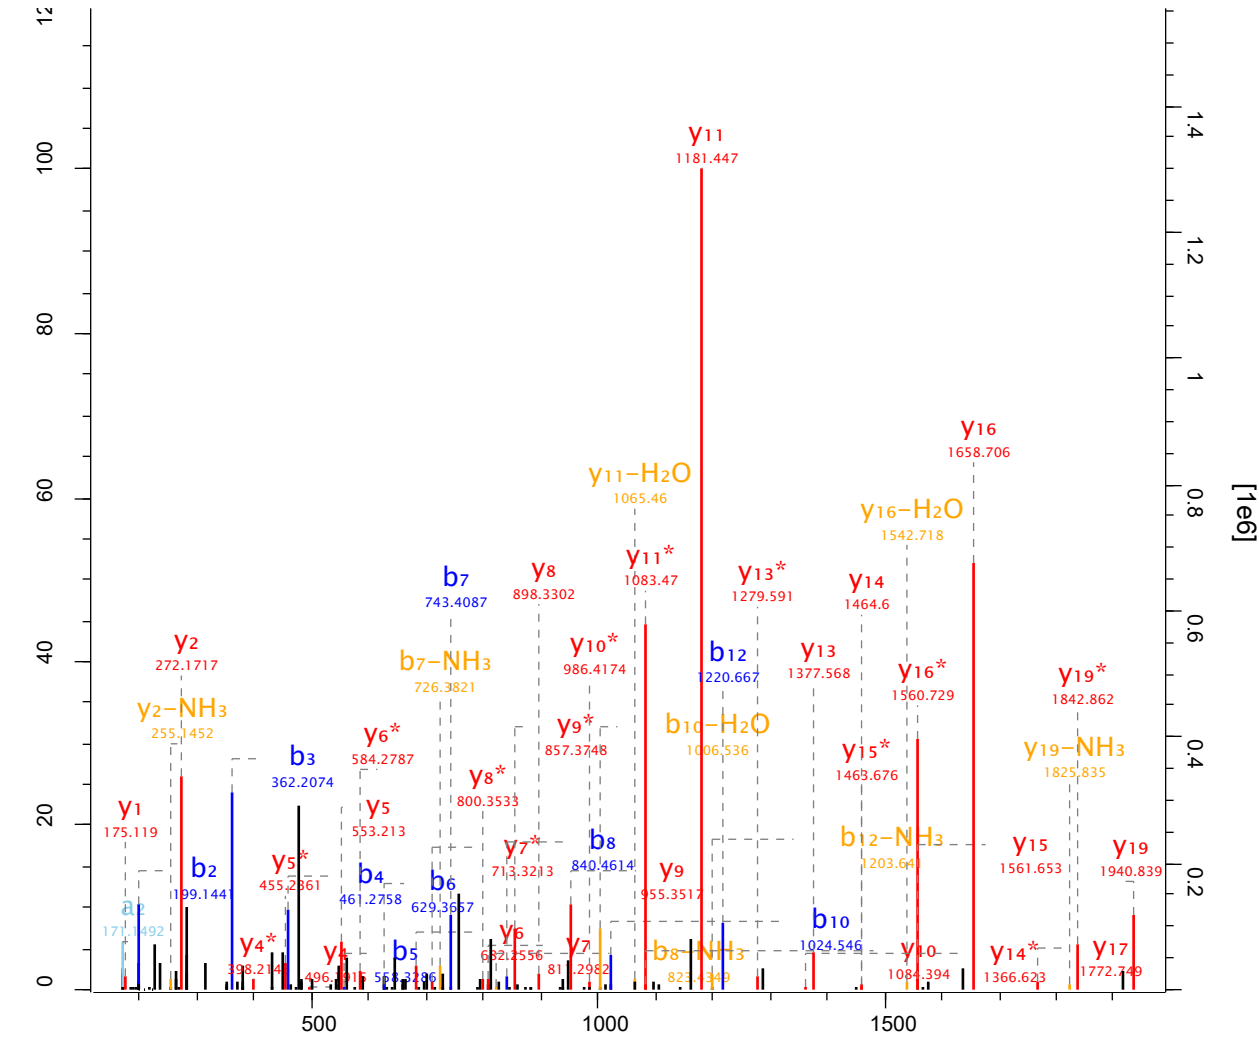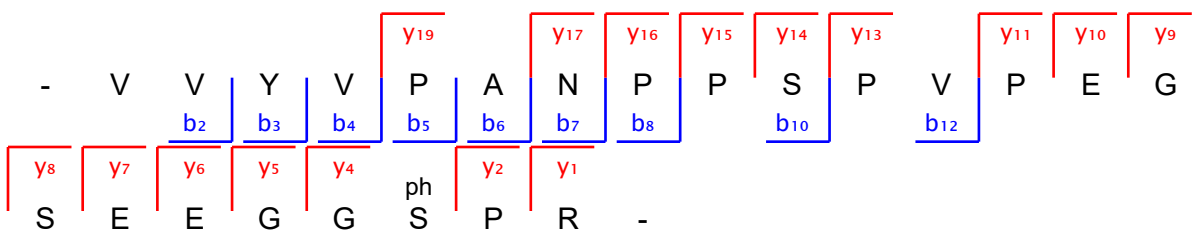

Raw file Scan Method Score m/z  
 sys\_15\_1 28460 FTMS; HCD 109.79 735.33

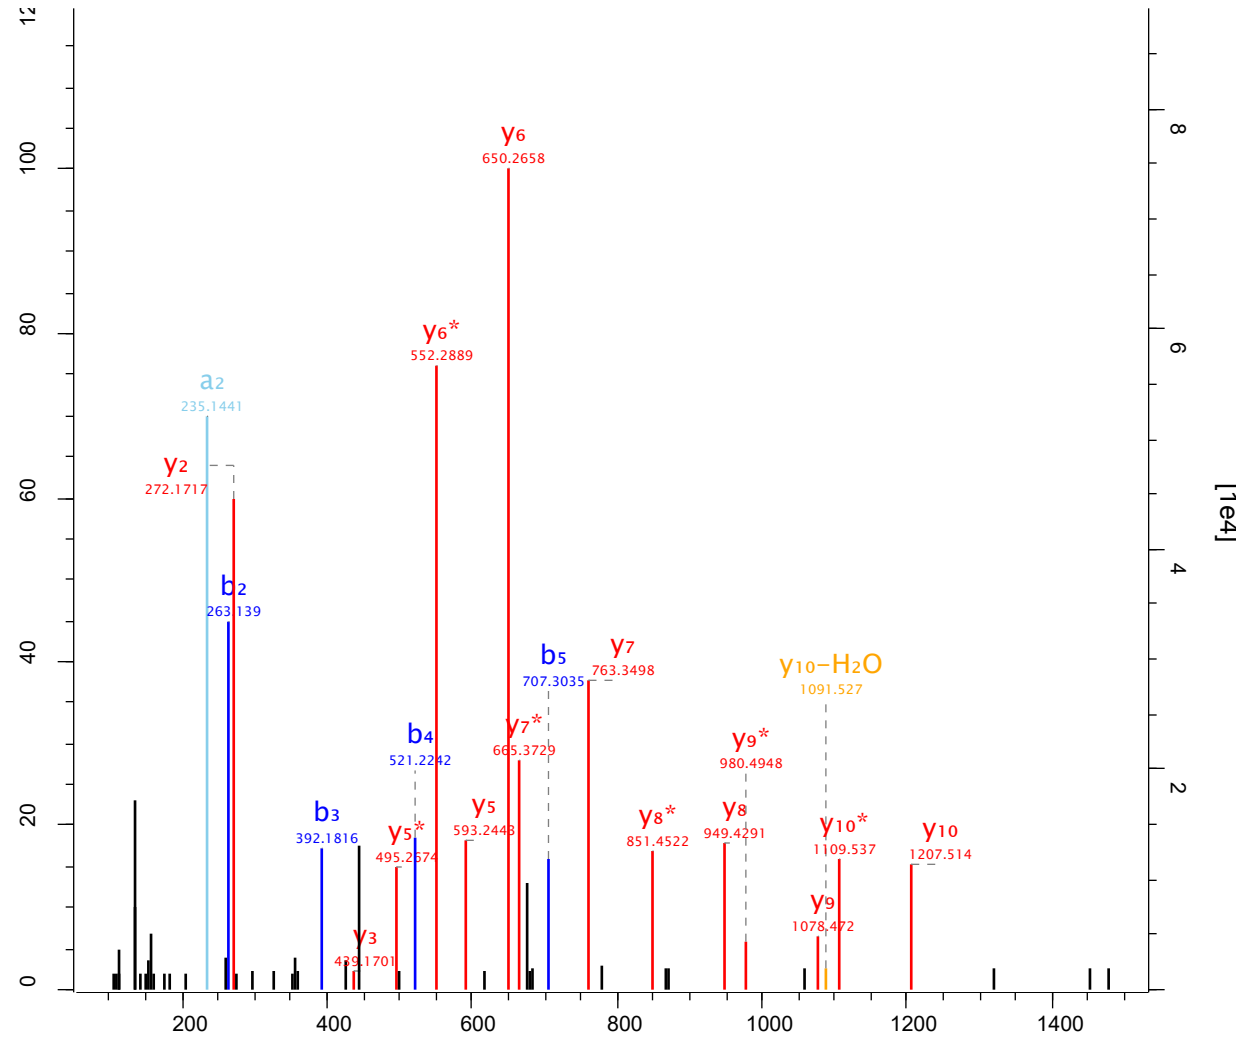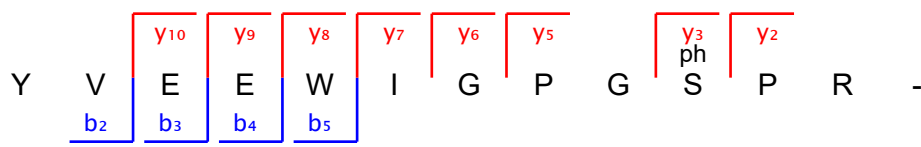



Raw file Scan Method Score m/z  
 sys\_15\_1 28491 FTMS; HCD 123.29 781.31

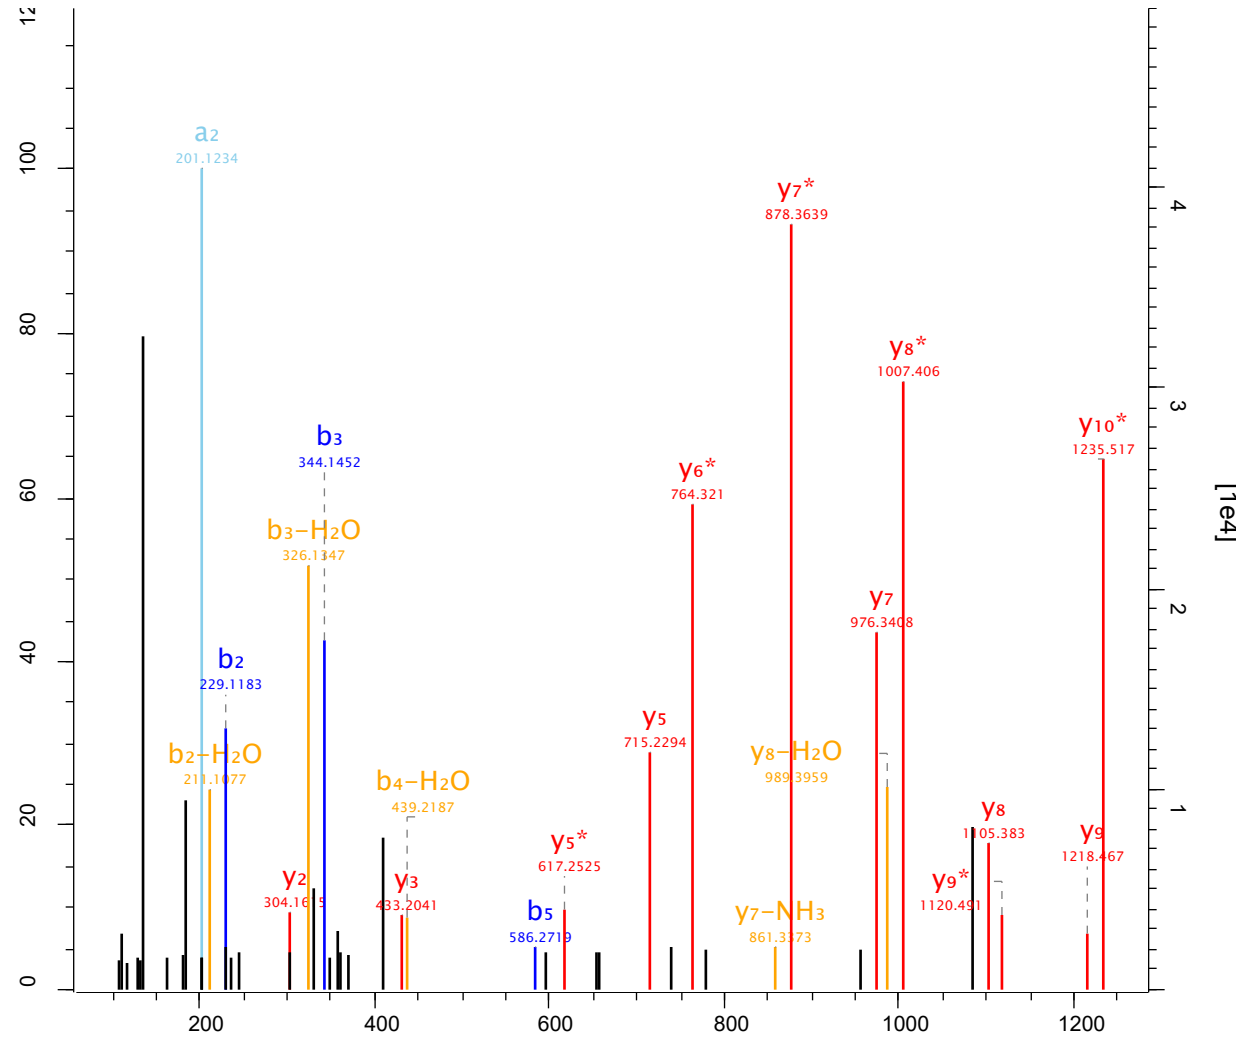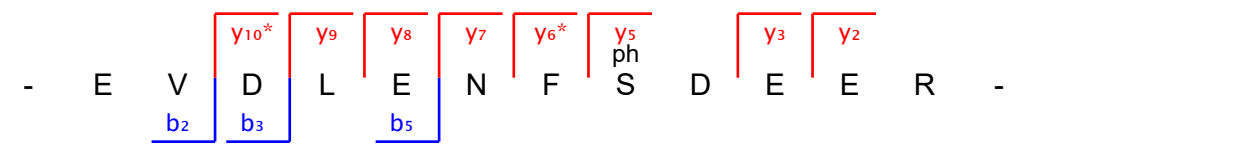

Raw file Scan Method Score m/z  
 sys\_15\_1 28549 FTMS; HCD 97.71 757.87

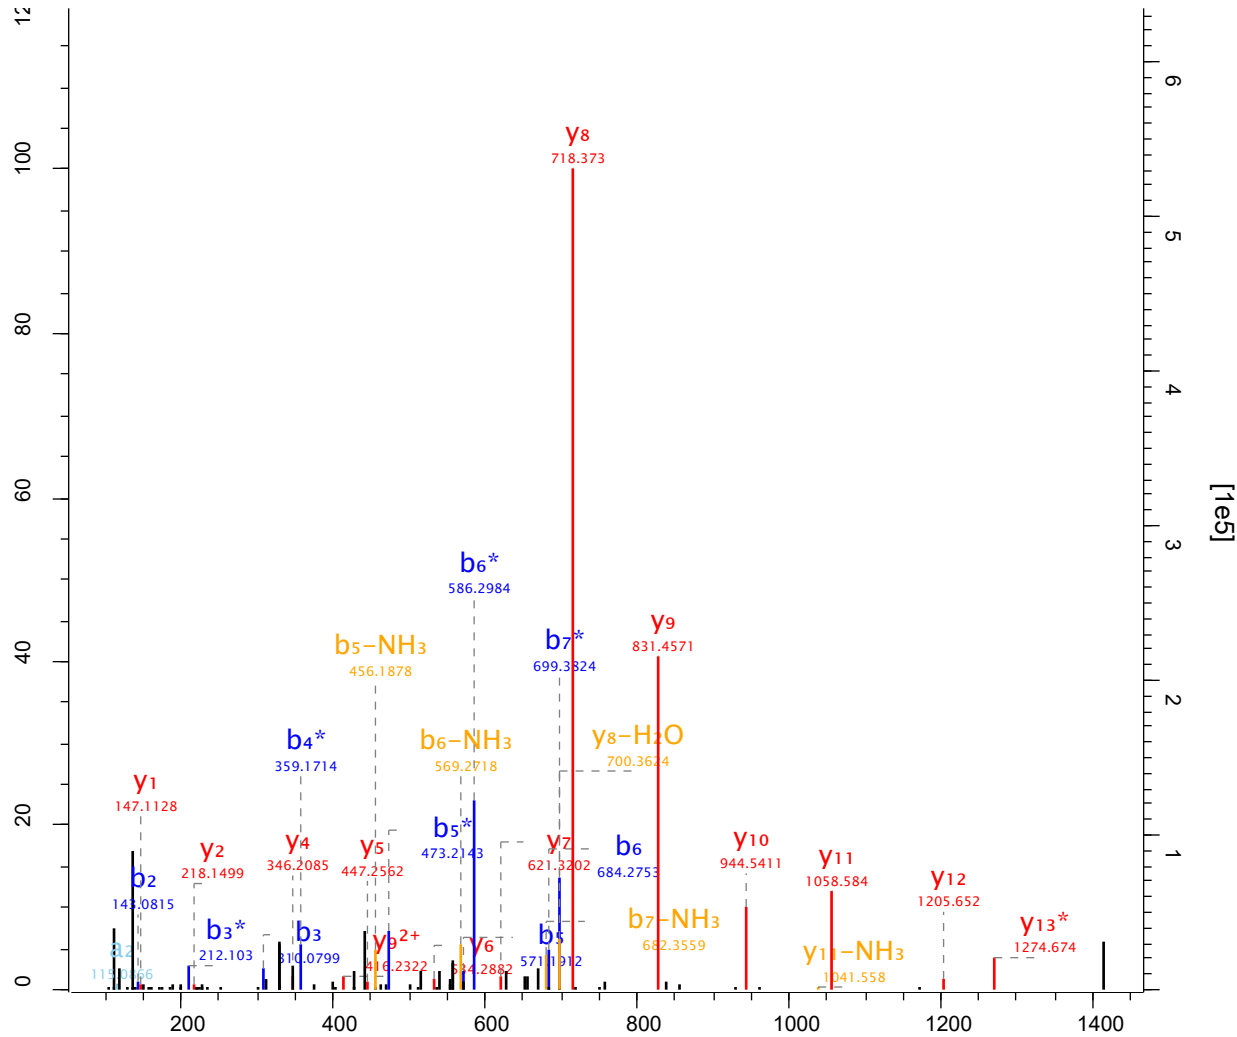

A A y13\*  
ph y12 y11 y10 y9 y8 y7 y6 y5 y4 y2 y1  
 - A b2 b3 b4\* b5 b6 b7\* P S S T G A A K

Raw file Scan Method Score m/z  
 sys\_15\_1 28886 FTMS; HCD 77.07 797.83

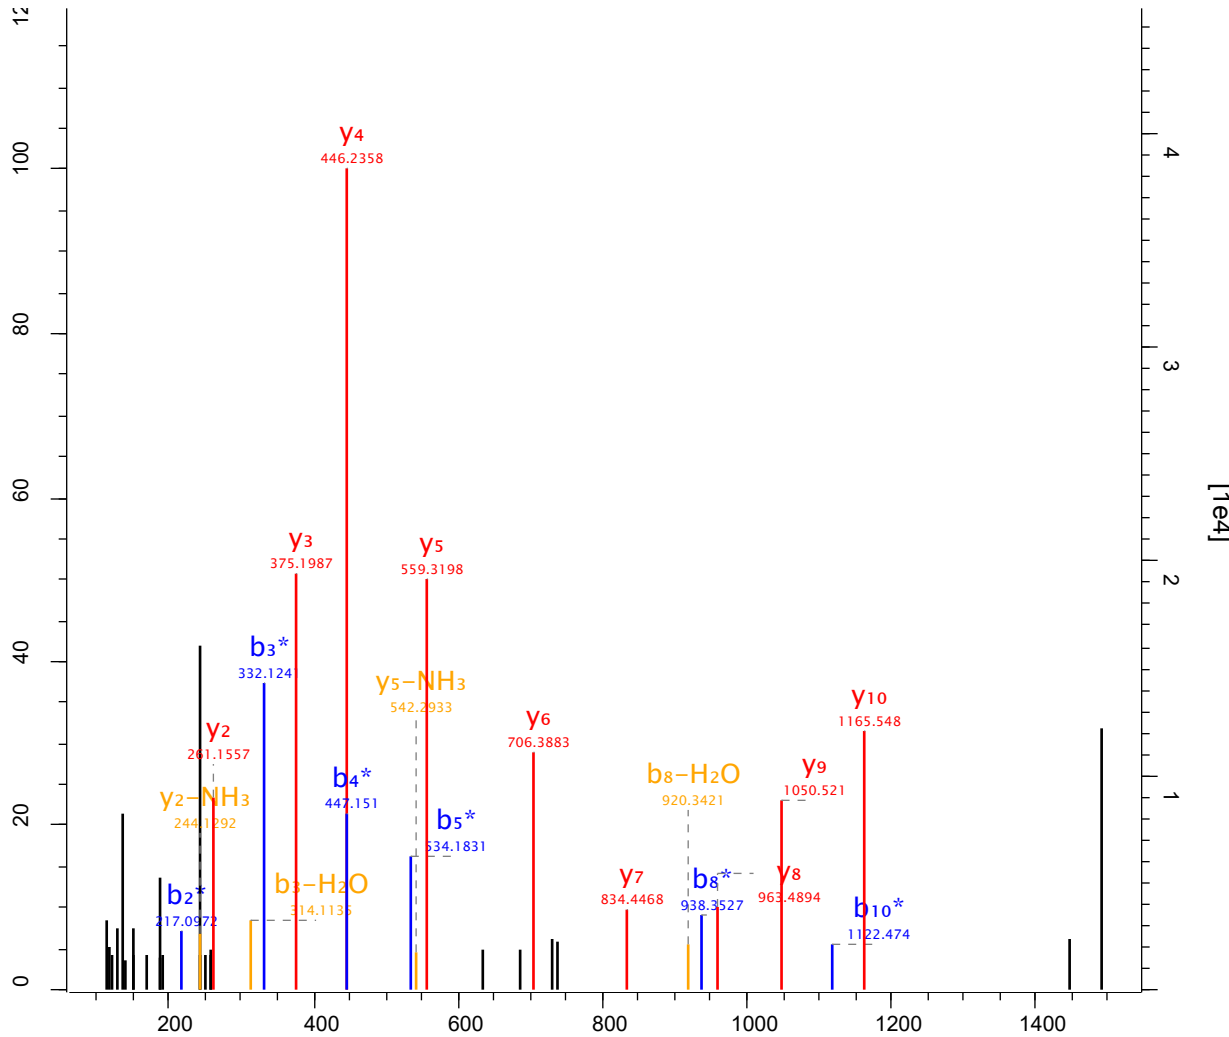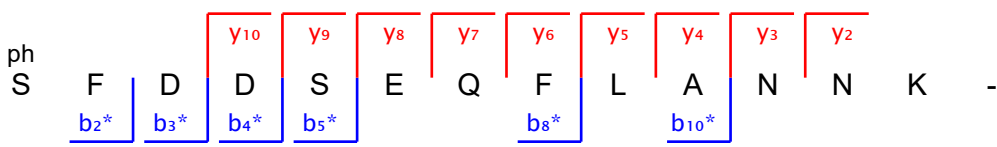

Raw file Scan Method Score m/z  
 sys\_15\_1 28929 FTMS; HCD 108.57 764.05

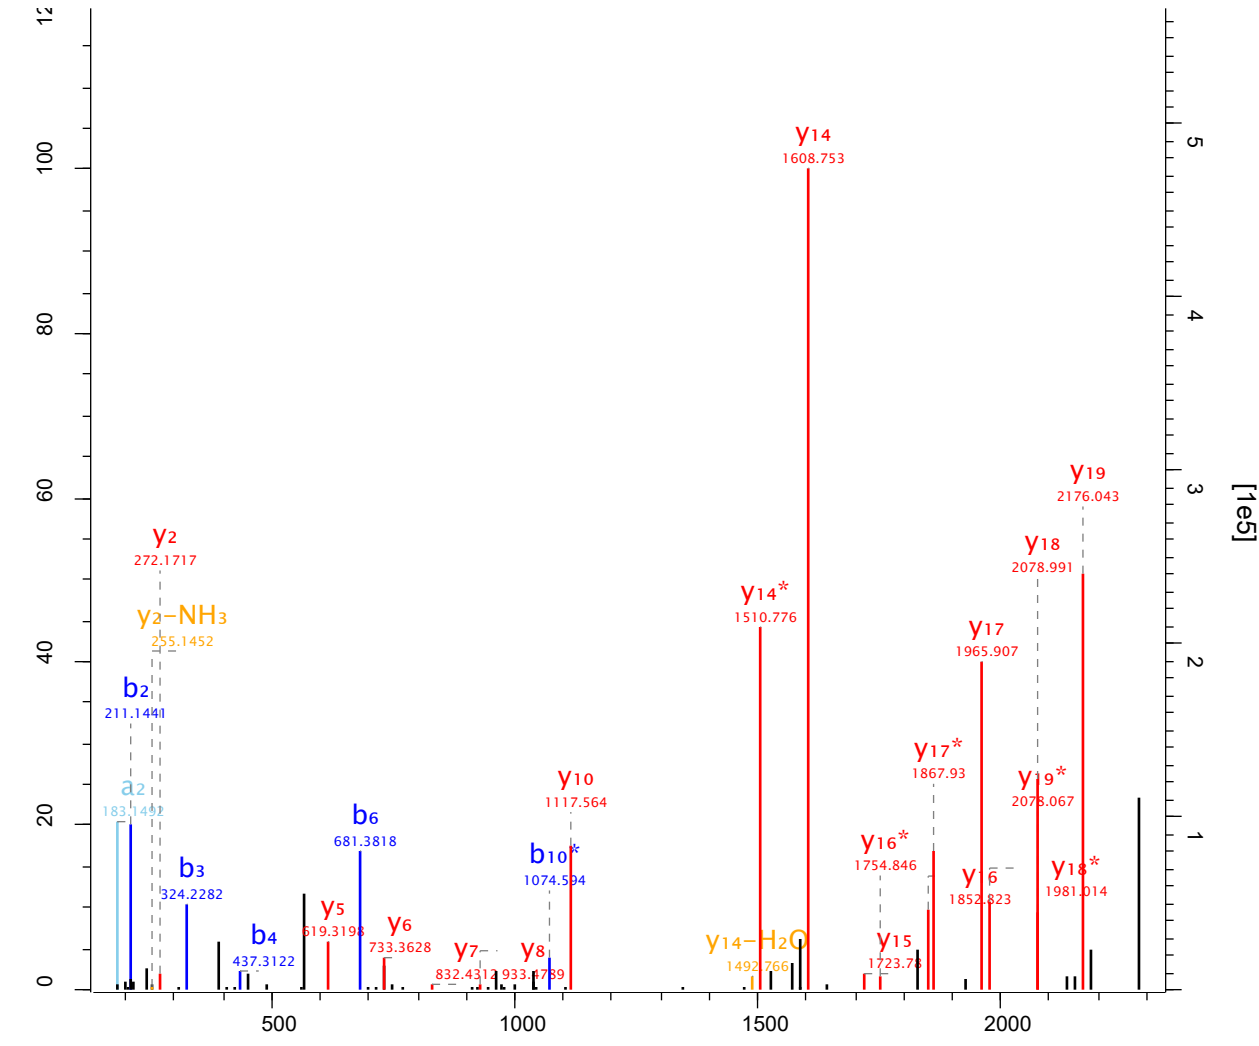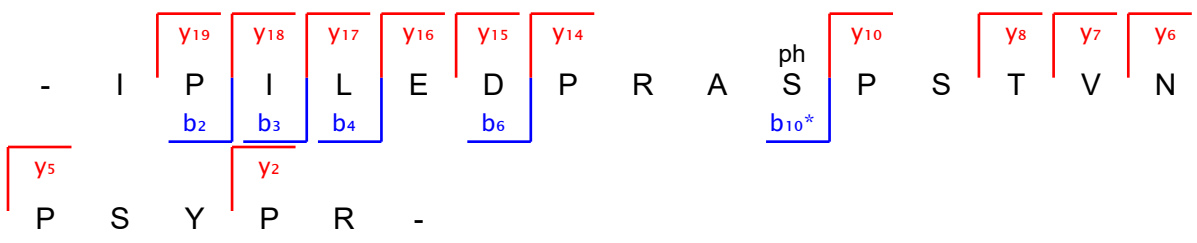

Raw file Scan Method Score m/z  
 sys\_15\_1 28942 FTMS; HCD 76.76 678.77

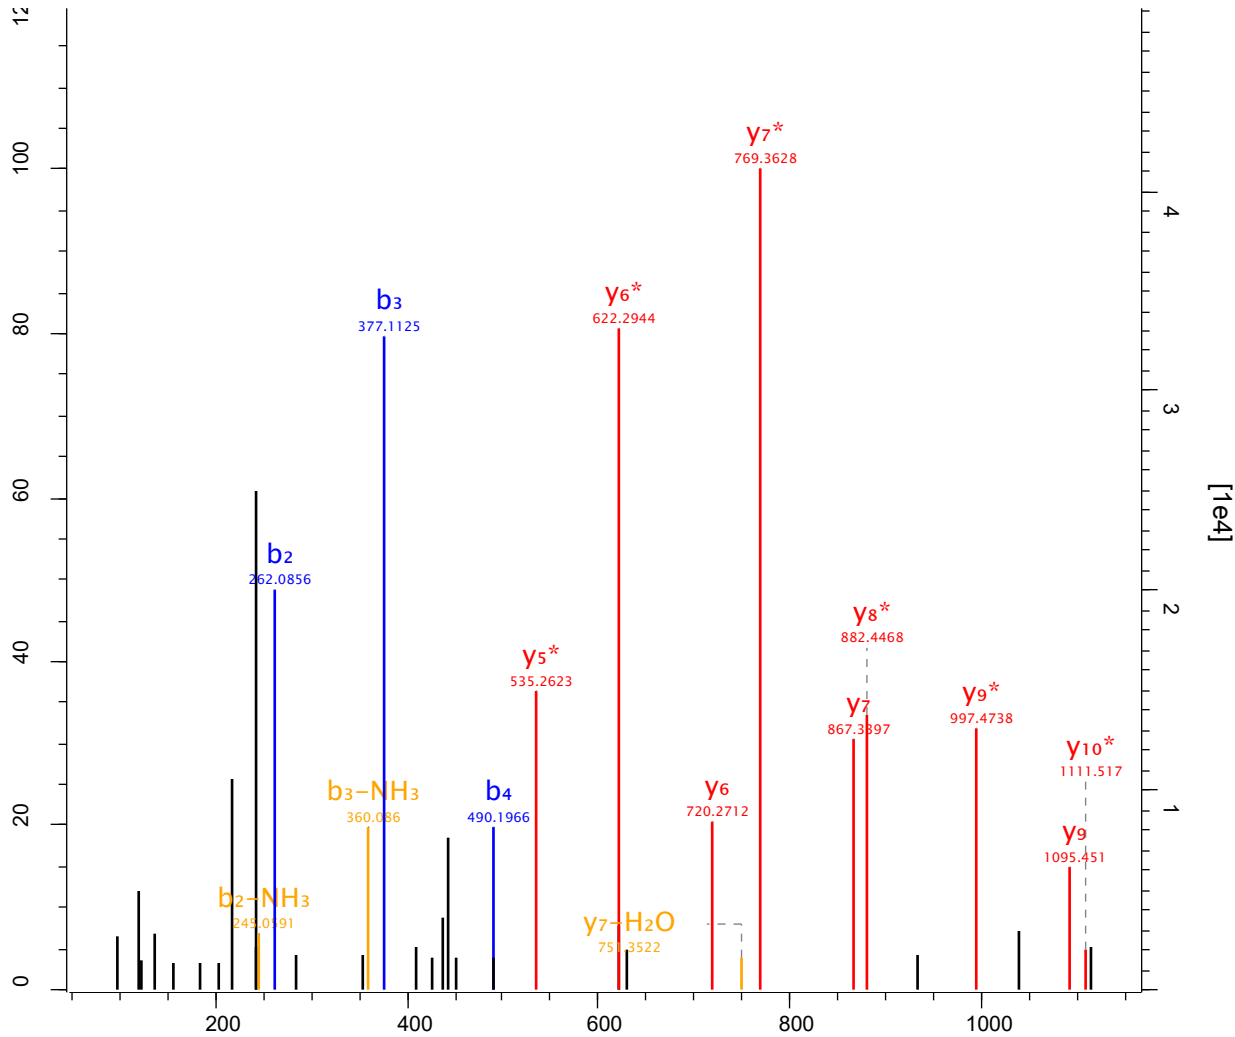

ox M y<sub>10</sub><sup>\*</sup> y<sub>9</sub> y<sub>8</sub><sup>\*</sup> y<sub>7</sub> y<sub>6</sub> y<sub>5</sub><sup>\*</sup>  
 - N D L F S G S F ph S R -  
b<sub>2</sub> b<sub>3</sub> b<sub>4</sub>

| Raw file | Scan  | Method    | Score | m/z    |
|----------|-------|-----------|-------|--------|
| sys_15_1 | 29114 | FTMS; HCD | 48.57 | 548.28 |

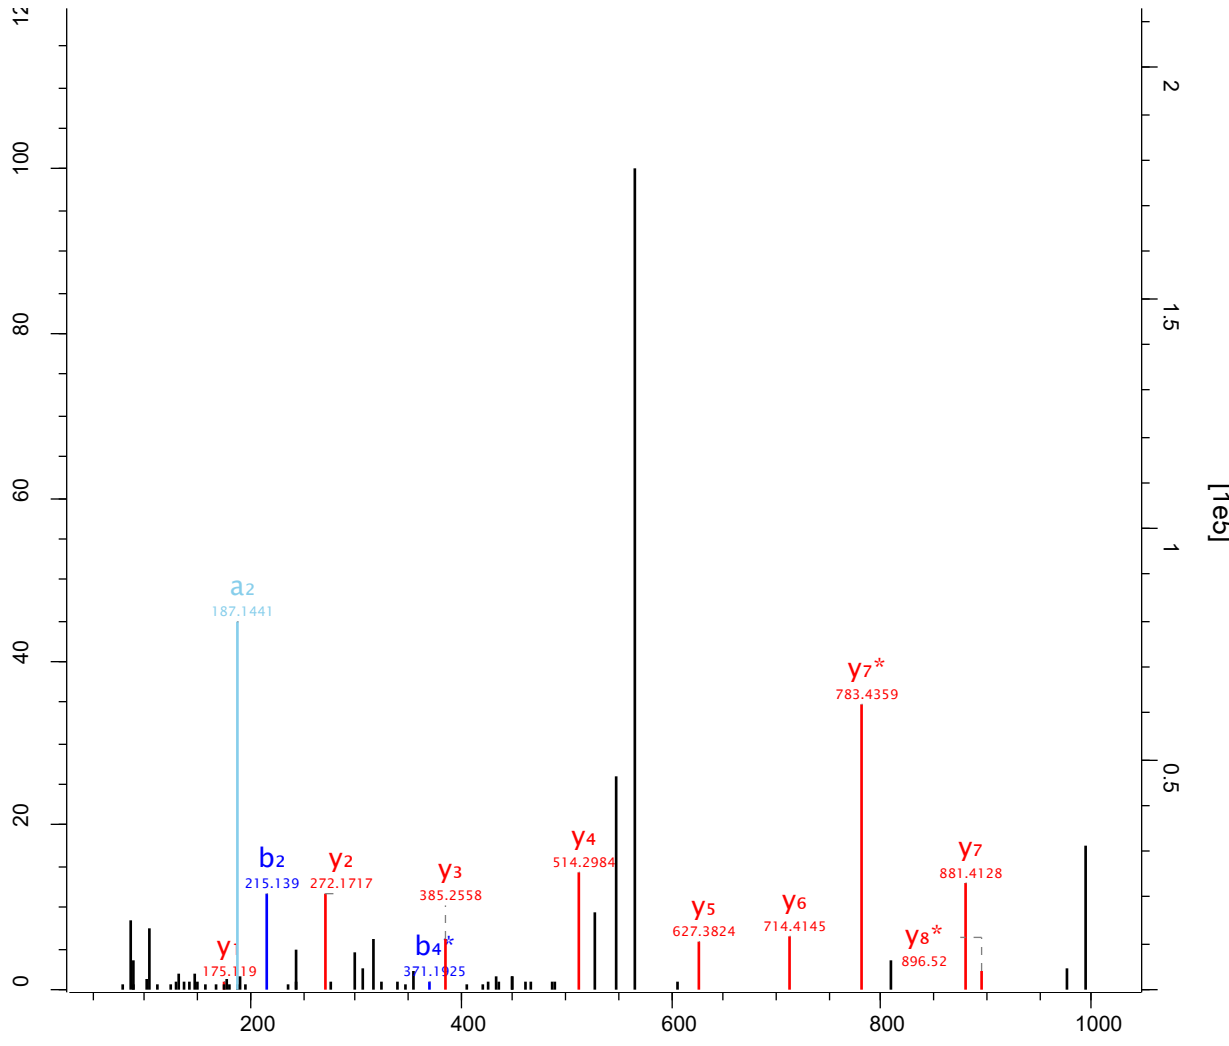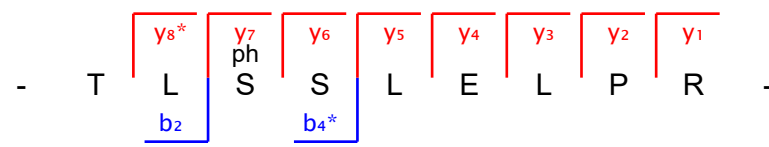

| Raw file | Scan  | Method    | Score | m/z   |
|----------|-------|-----------|-------|-------|
| sys_15_1 | 29185 | FTMS; HCD | 50.3  | 710.3 |

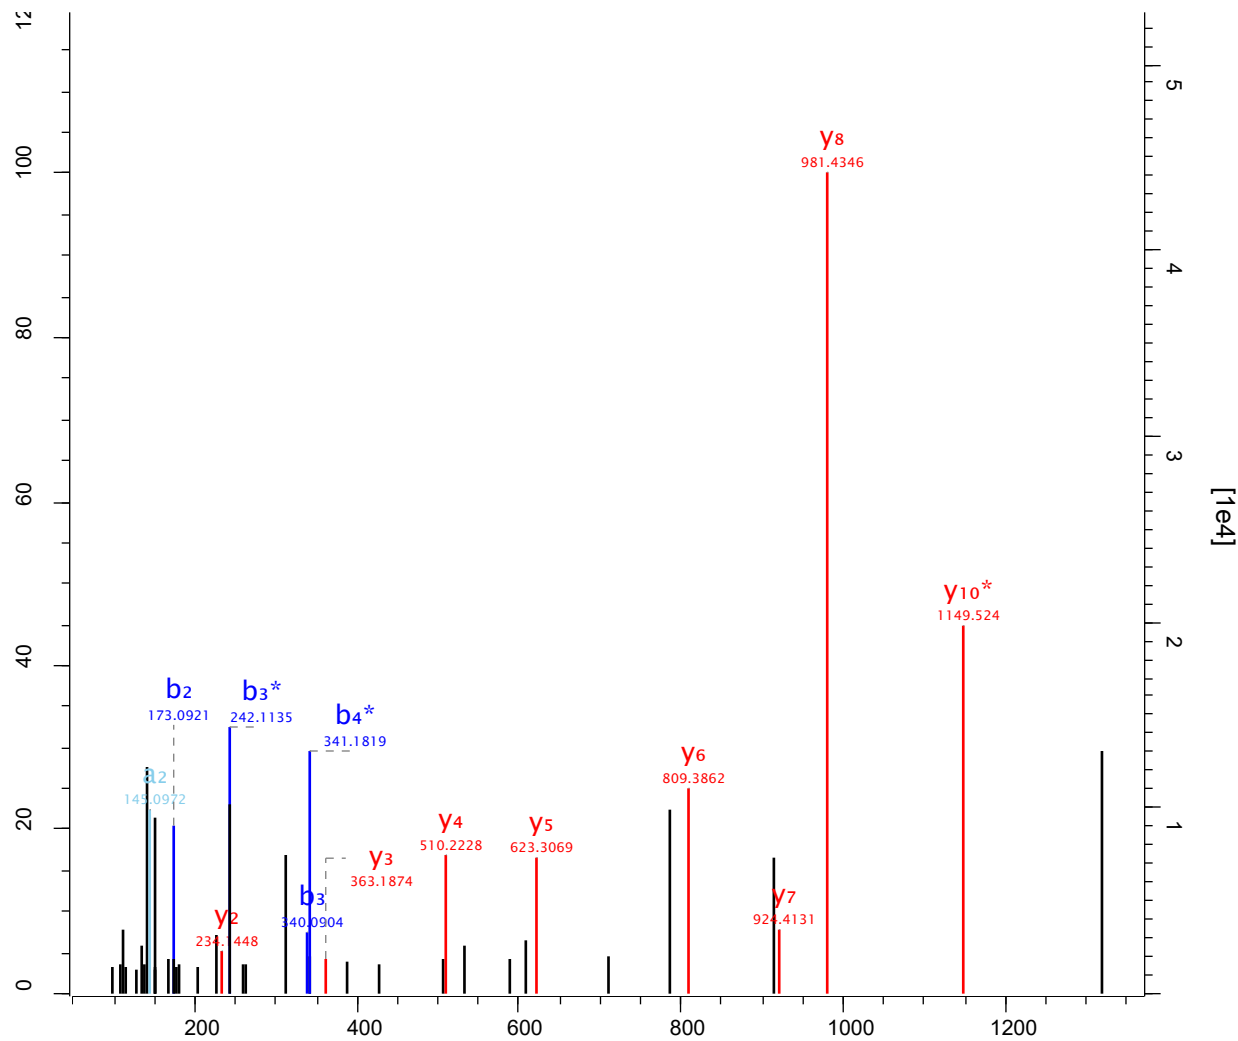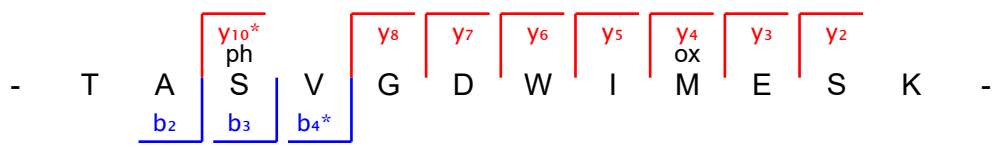





Raw file Scan Method Score m/z  
 sys\_15\_1 2931 FTMS; HCD 42.03 711.32

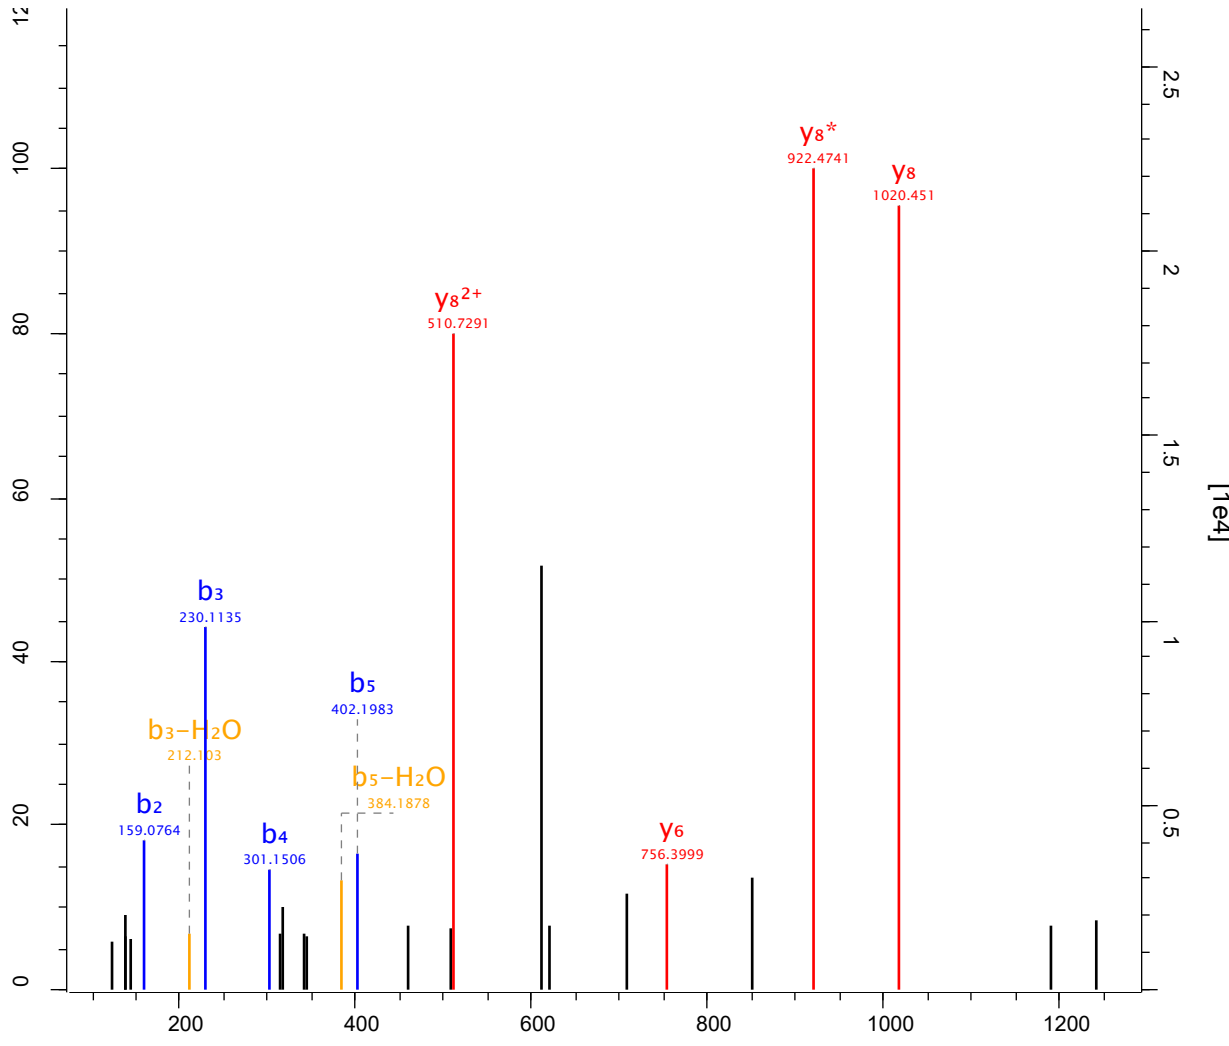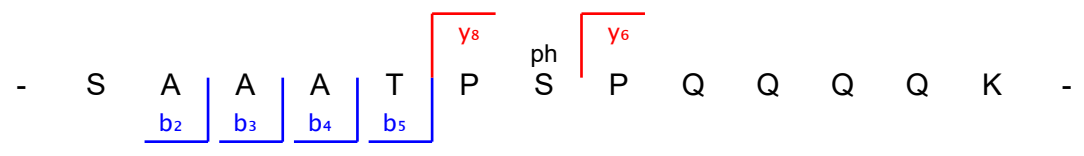

Raw file Scan Method Score m/z  
 sys\_15\_1 29353 FTMS; HCD 44.34 723.96

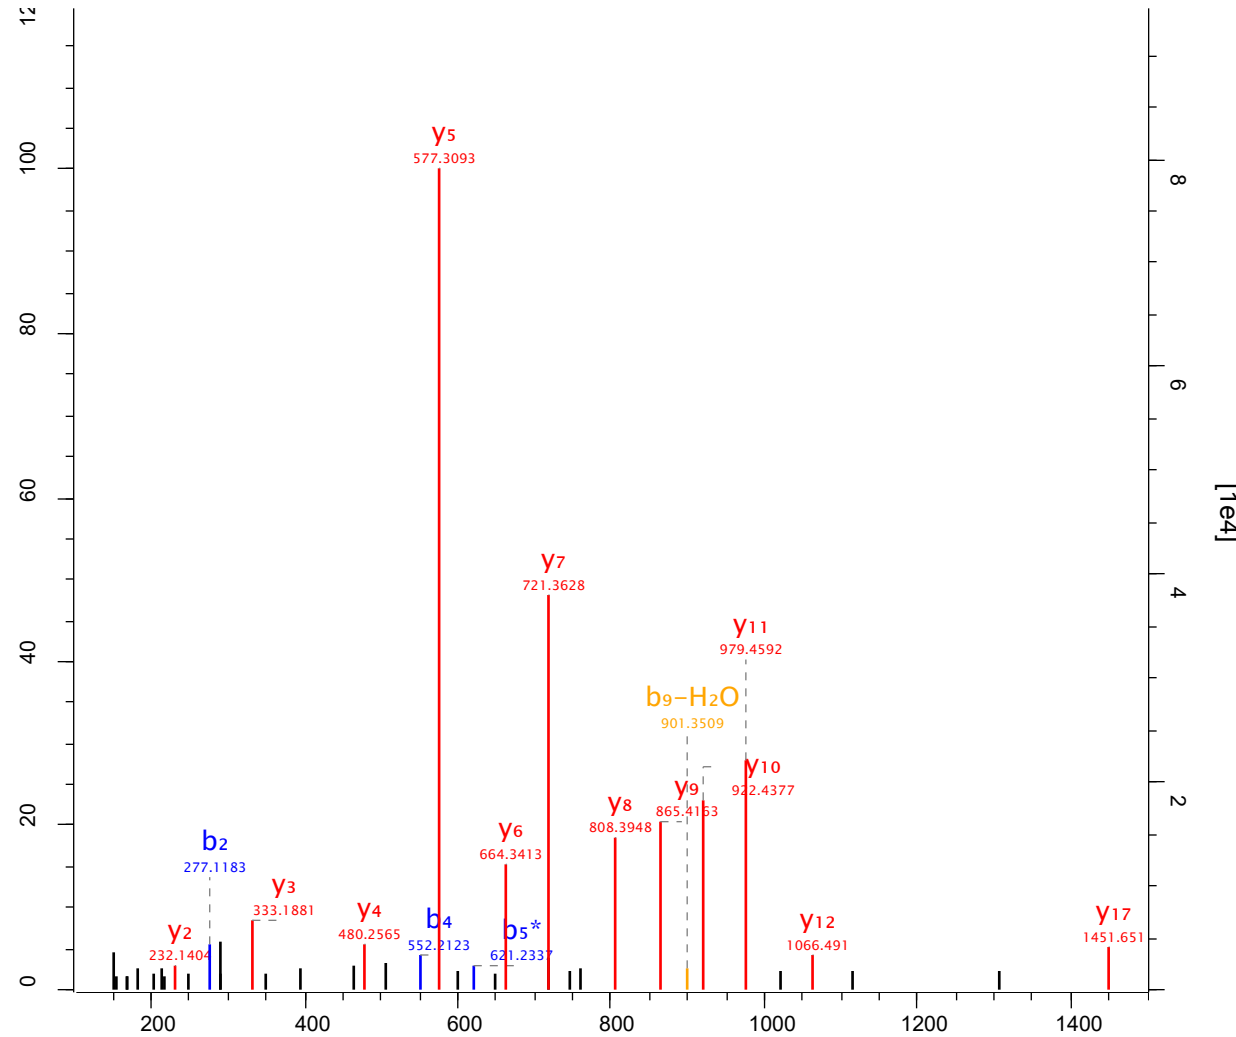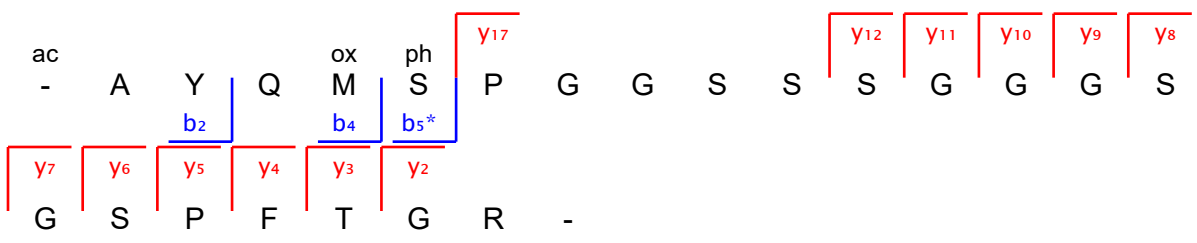

| Raw file | Scan | Method    | Score | m/z    |
|----------|------|-----------|-------|--------|
| sys_15_1 | 2937 | FTMS; HCD | 43.76 | 659.27 |

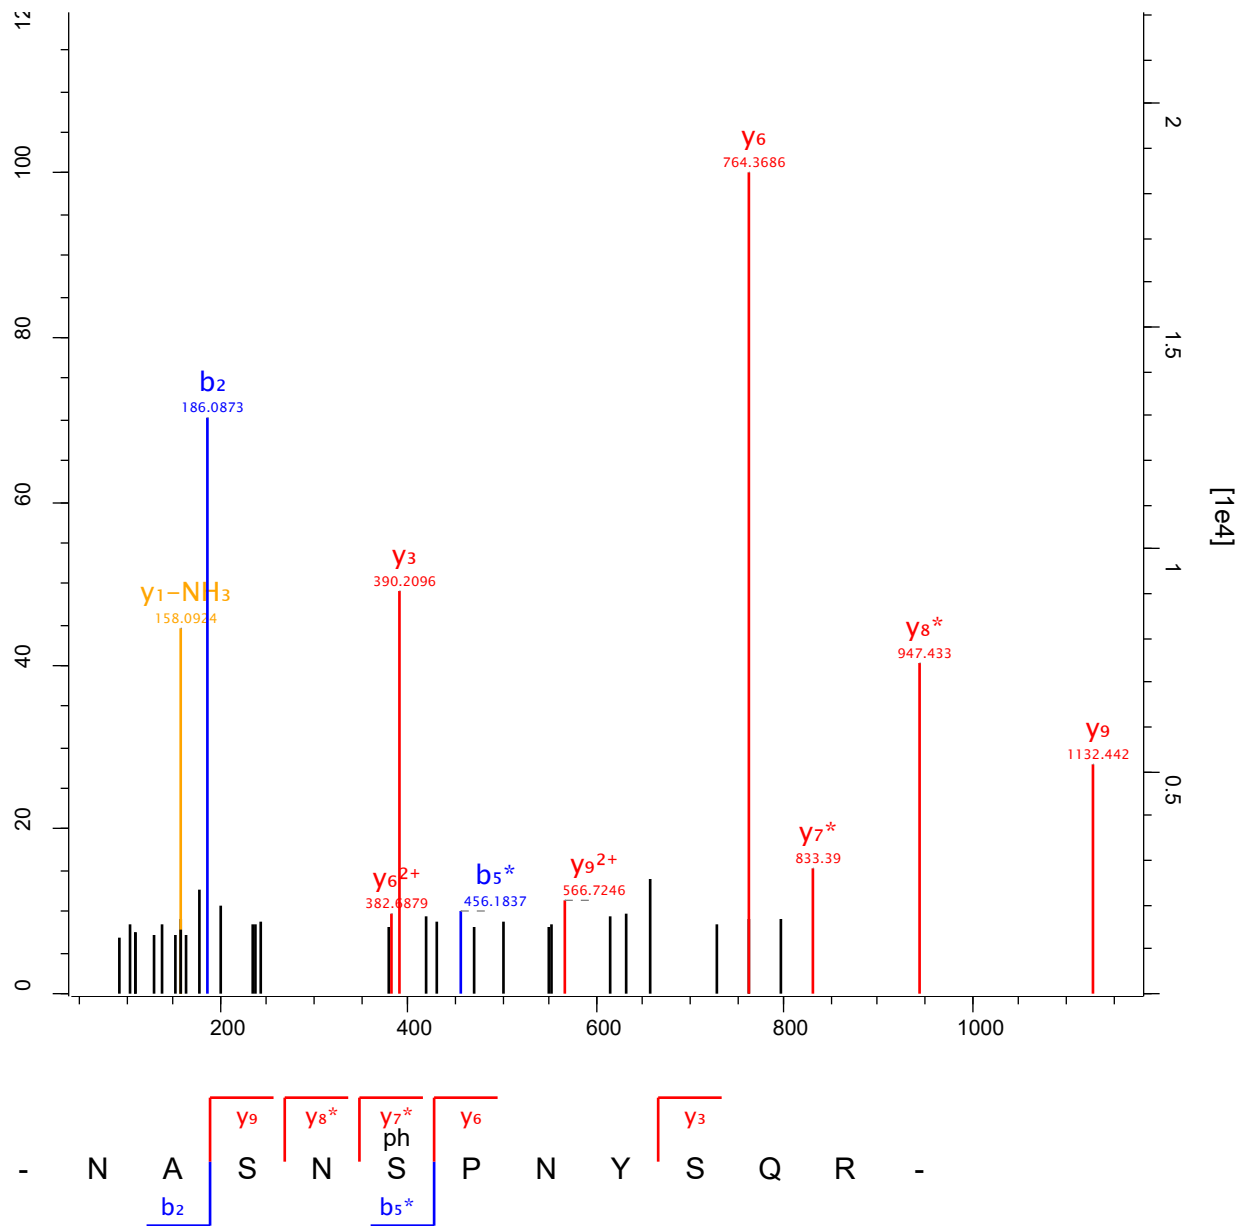

Raw file Scan Method Score m/z  
 sys\_15\_1 2946 FTMS; HCD 86.34 498.73

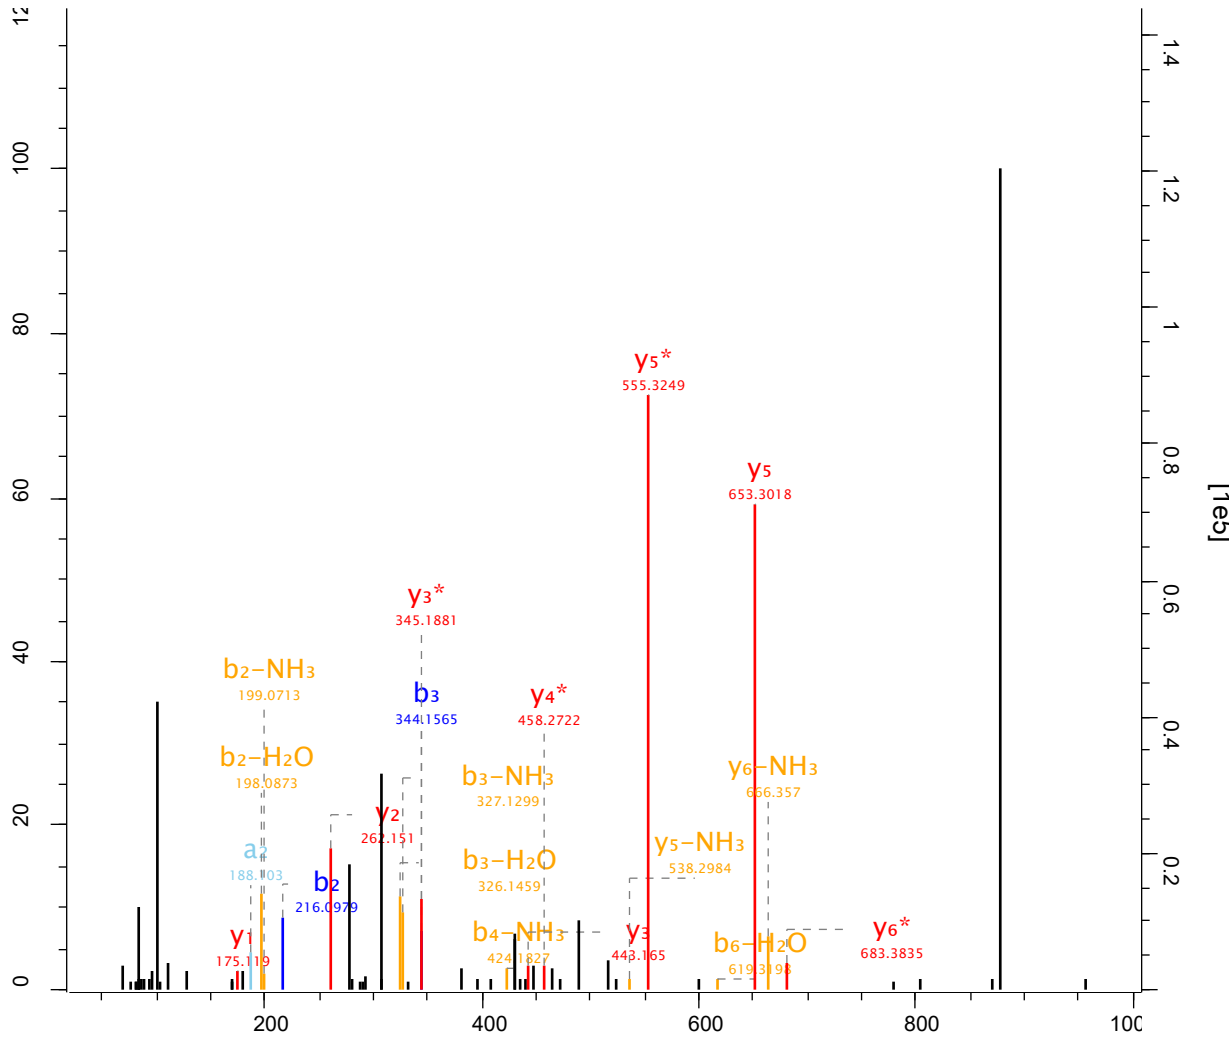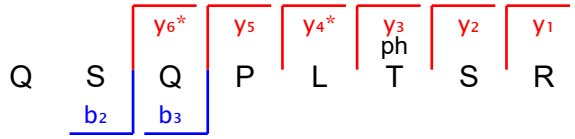

Raw file Scan Method Score m/z  
 sys\_15\_1 29469 FTMS; HCD 159.76 1079.98

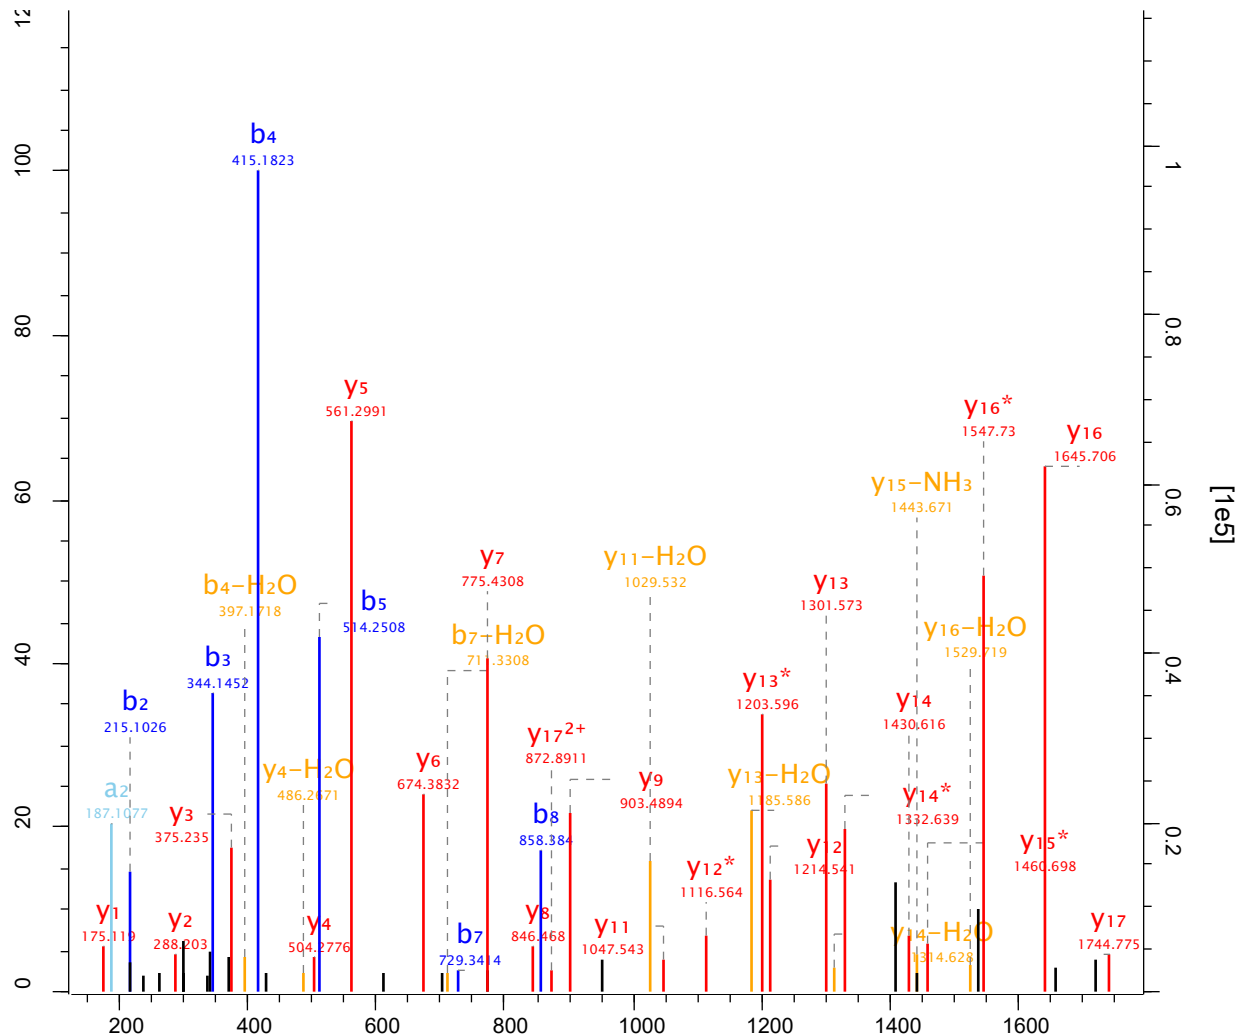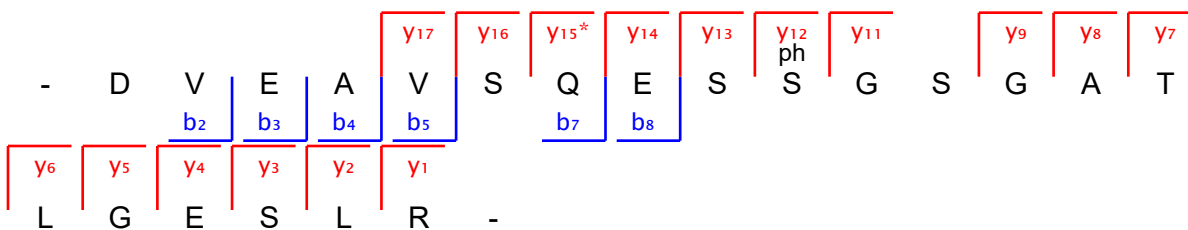

Raw file Scan Method Score m/z  
 sys\_15\_1 29561 FTMS; HCD 72.99 728.69

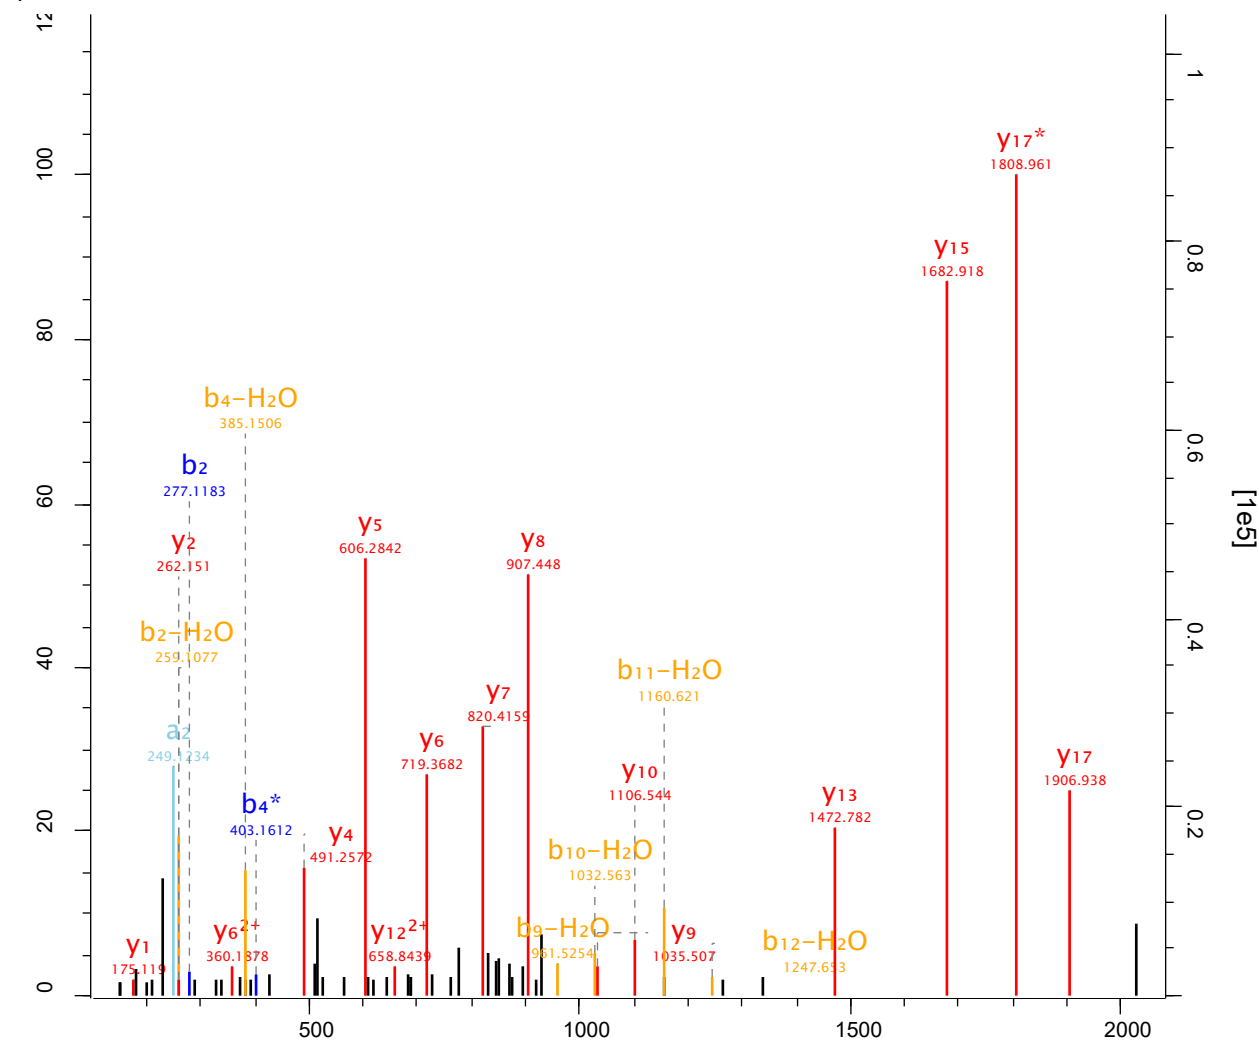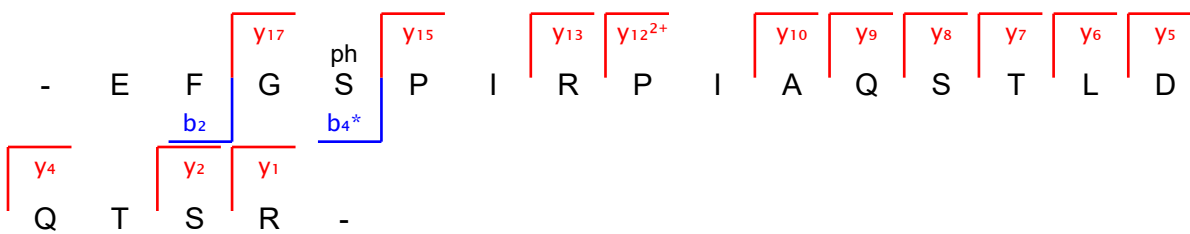

Raw file Scan Method Score m/z  
 sys\_15\_1 2965 FTMS; HCD 50.35 506.71

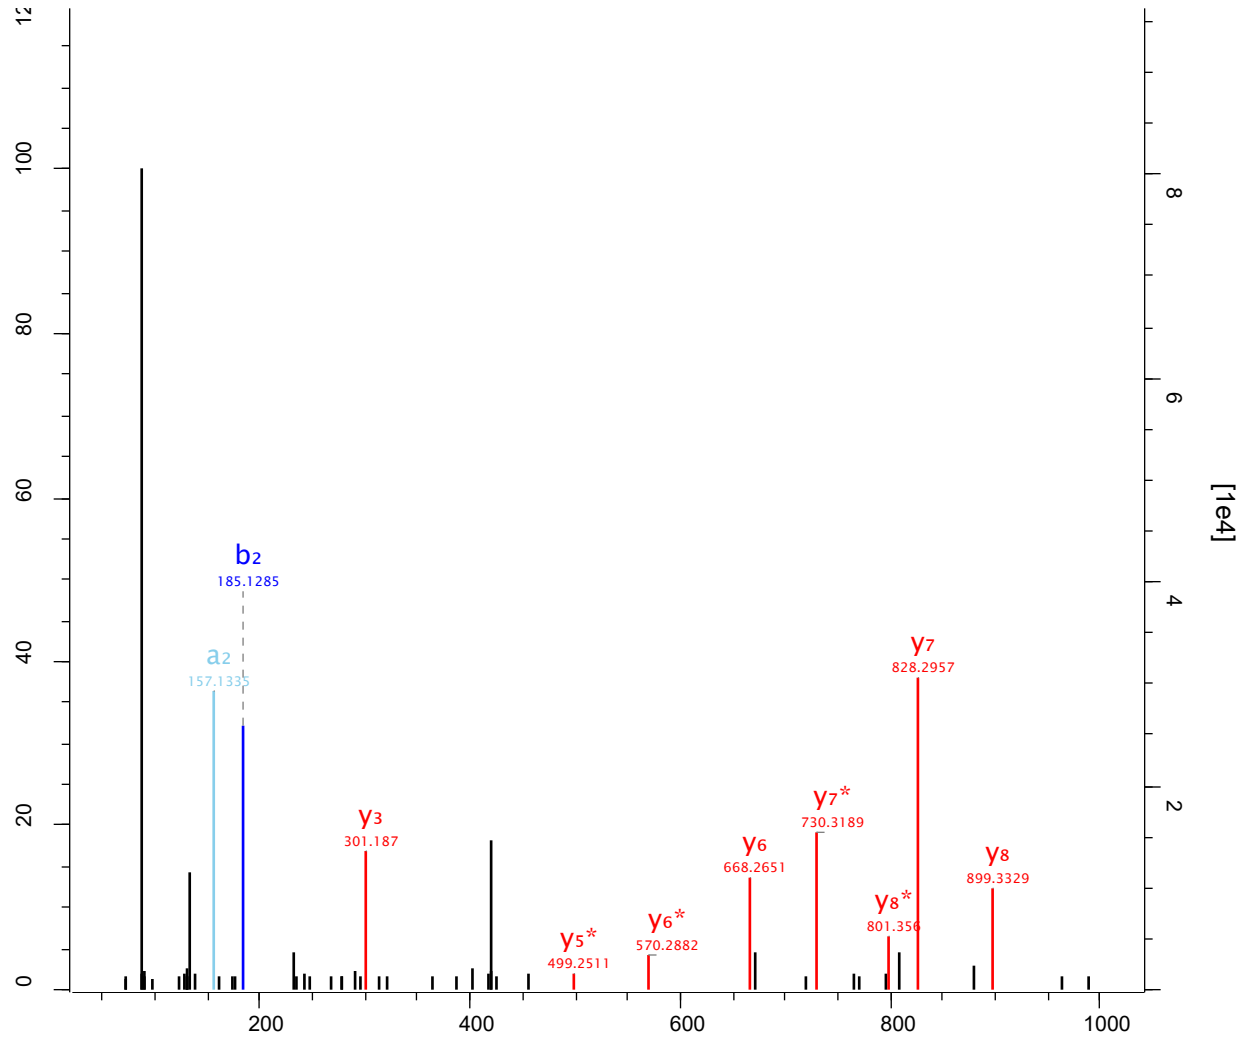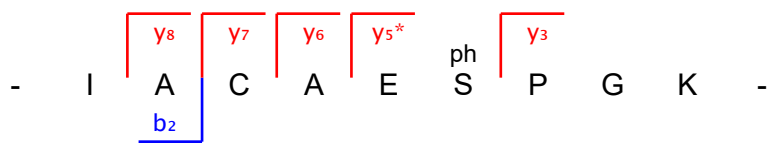

Raw file Scan Method Score m/z  
 sys\_15\_1 29675 FTMS; HCD 51.73 583.25

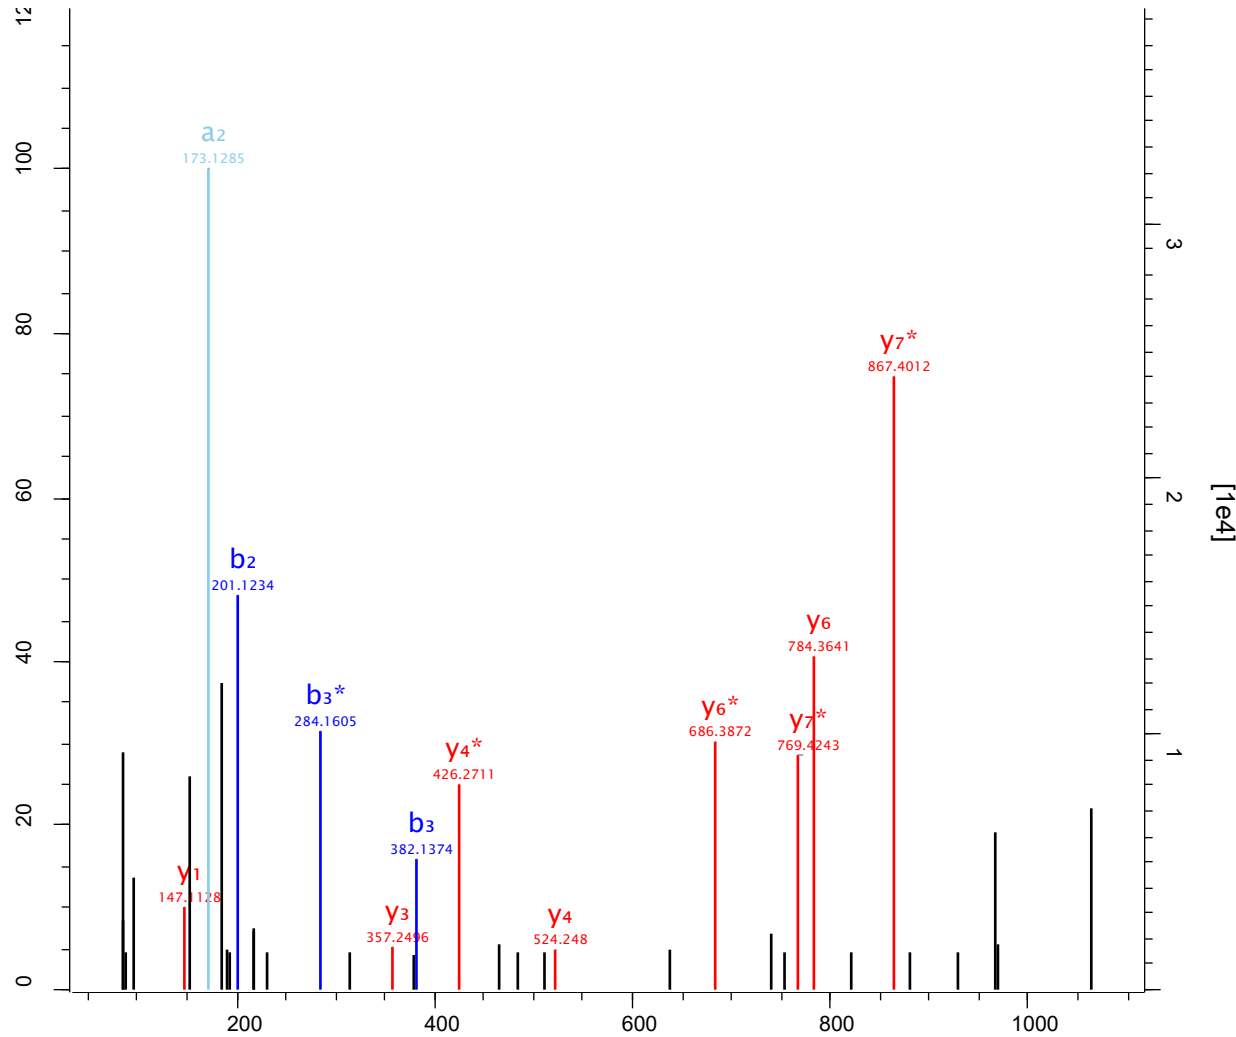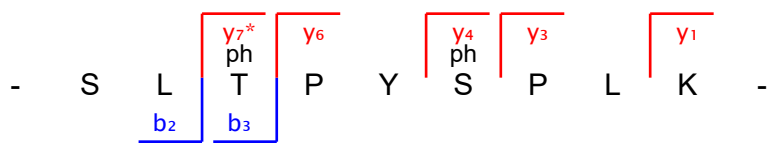



Raw file Scan Method Score m/z  
 sys\_15\_1 29855 FTMS; HCD 42.06 657.64

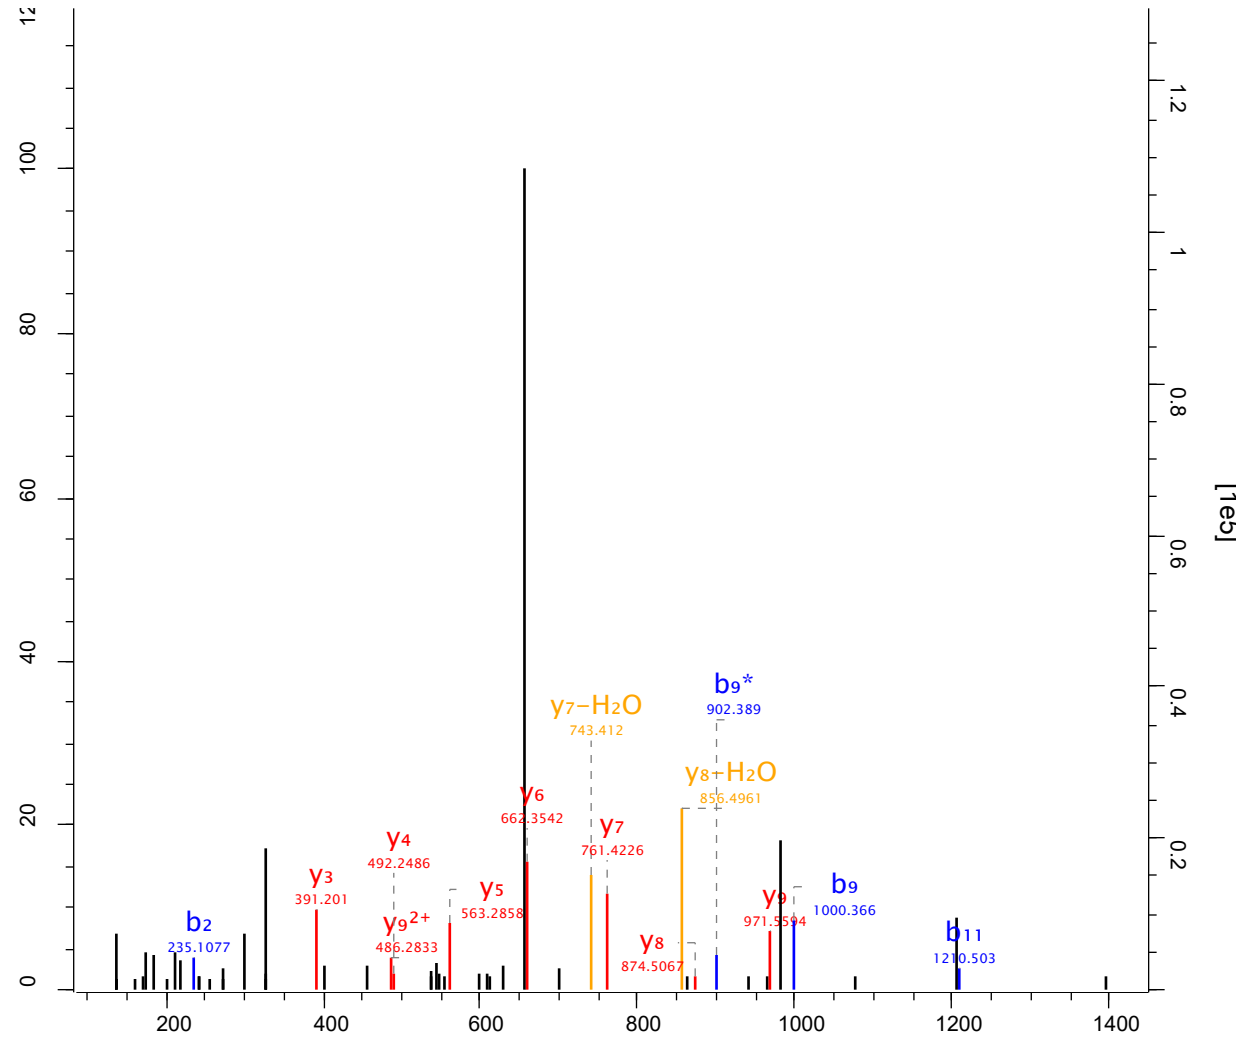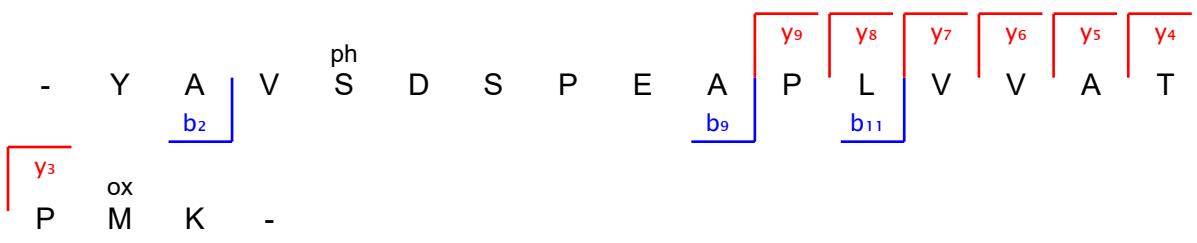

Raw file Scan Method Score m/z  
 sys\_15\_1 29863 FTMS; HCD 113.4 758.33

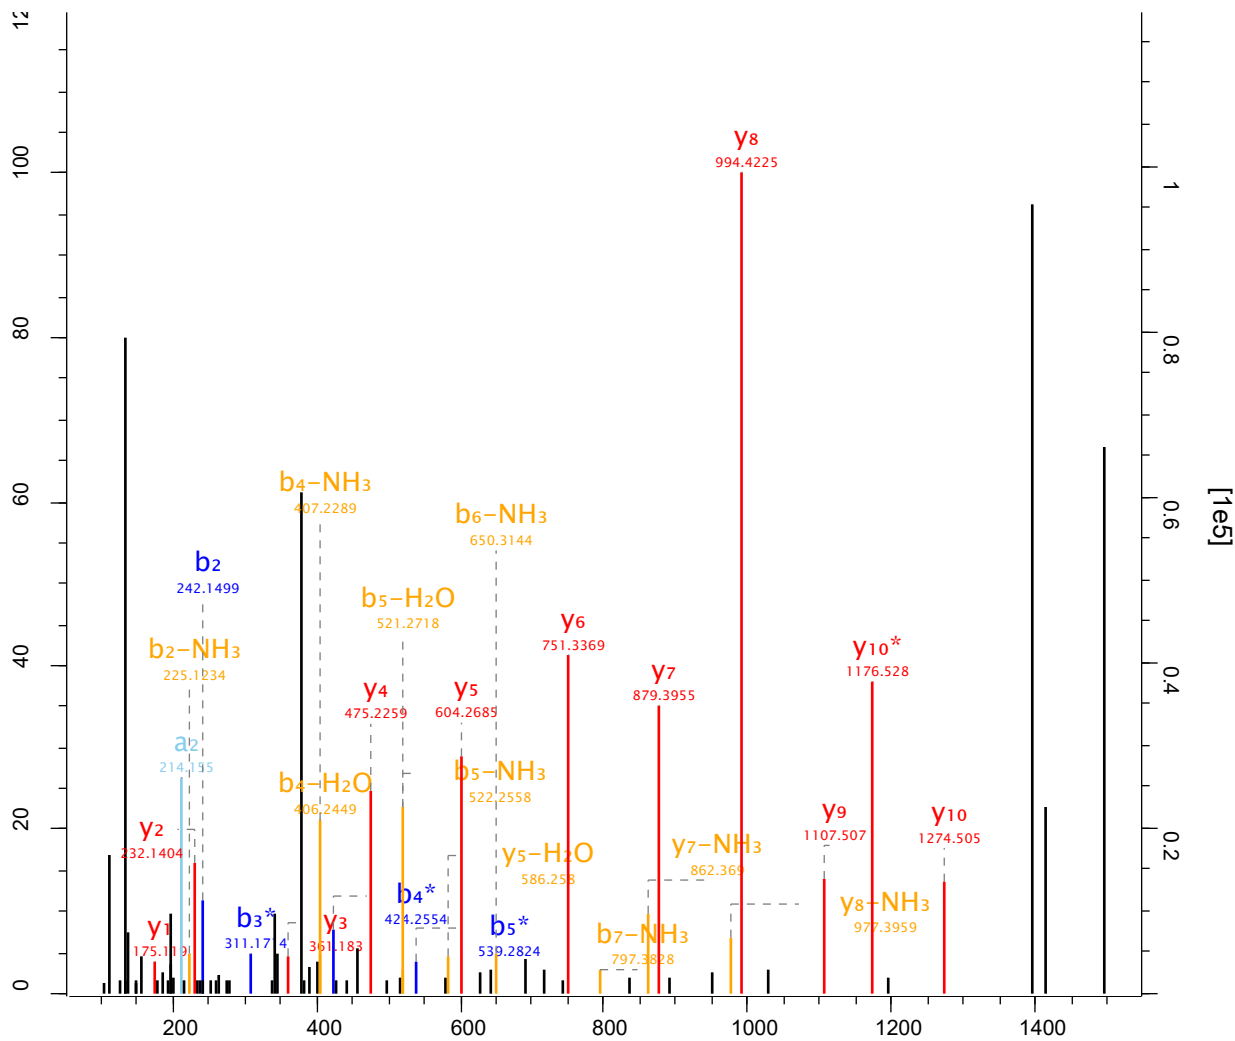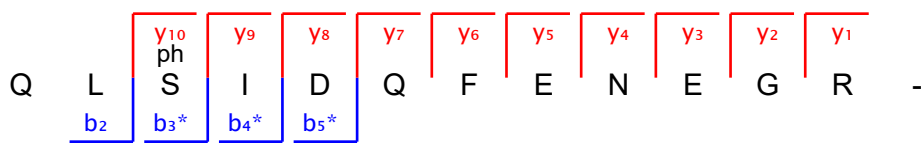

Raw file Scan Method Score m/z  
 sys\_15\_1 29954 FTMS; HCD 166.28 854.89

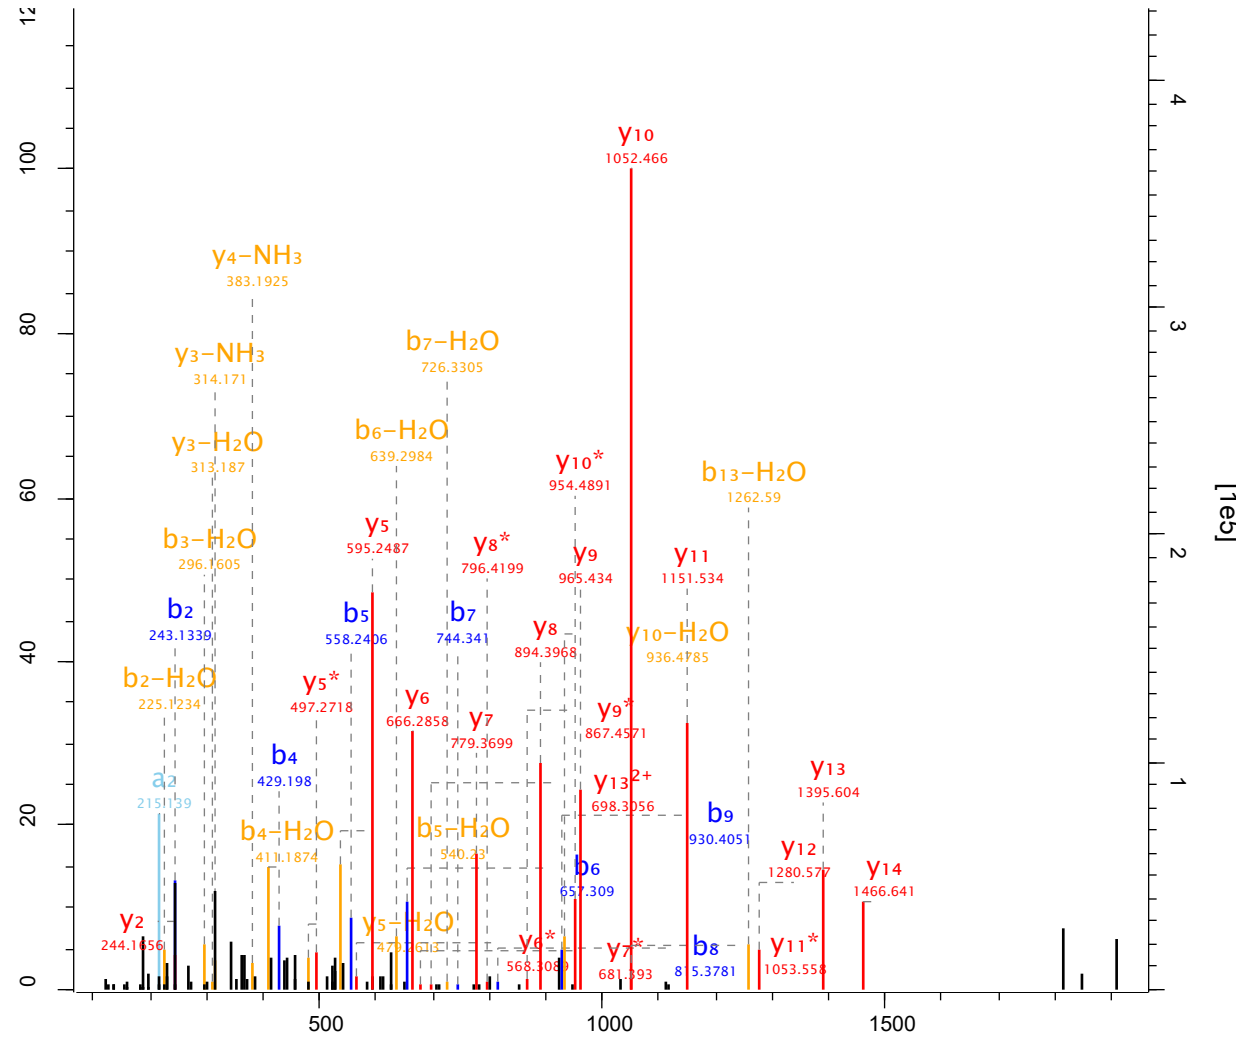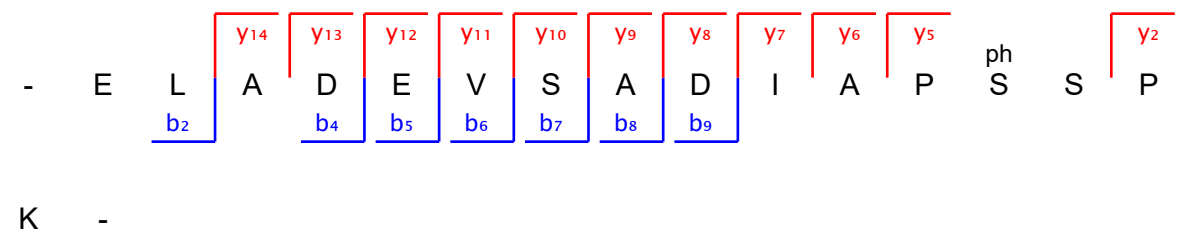

Raw file Scan Method Score m/z  
 sys\_15\_1 29977 FTMS; HCD 98.16 549.23

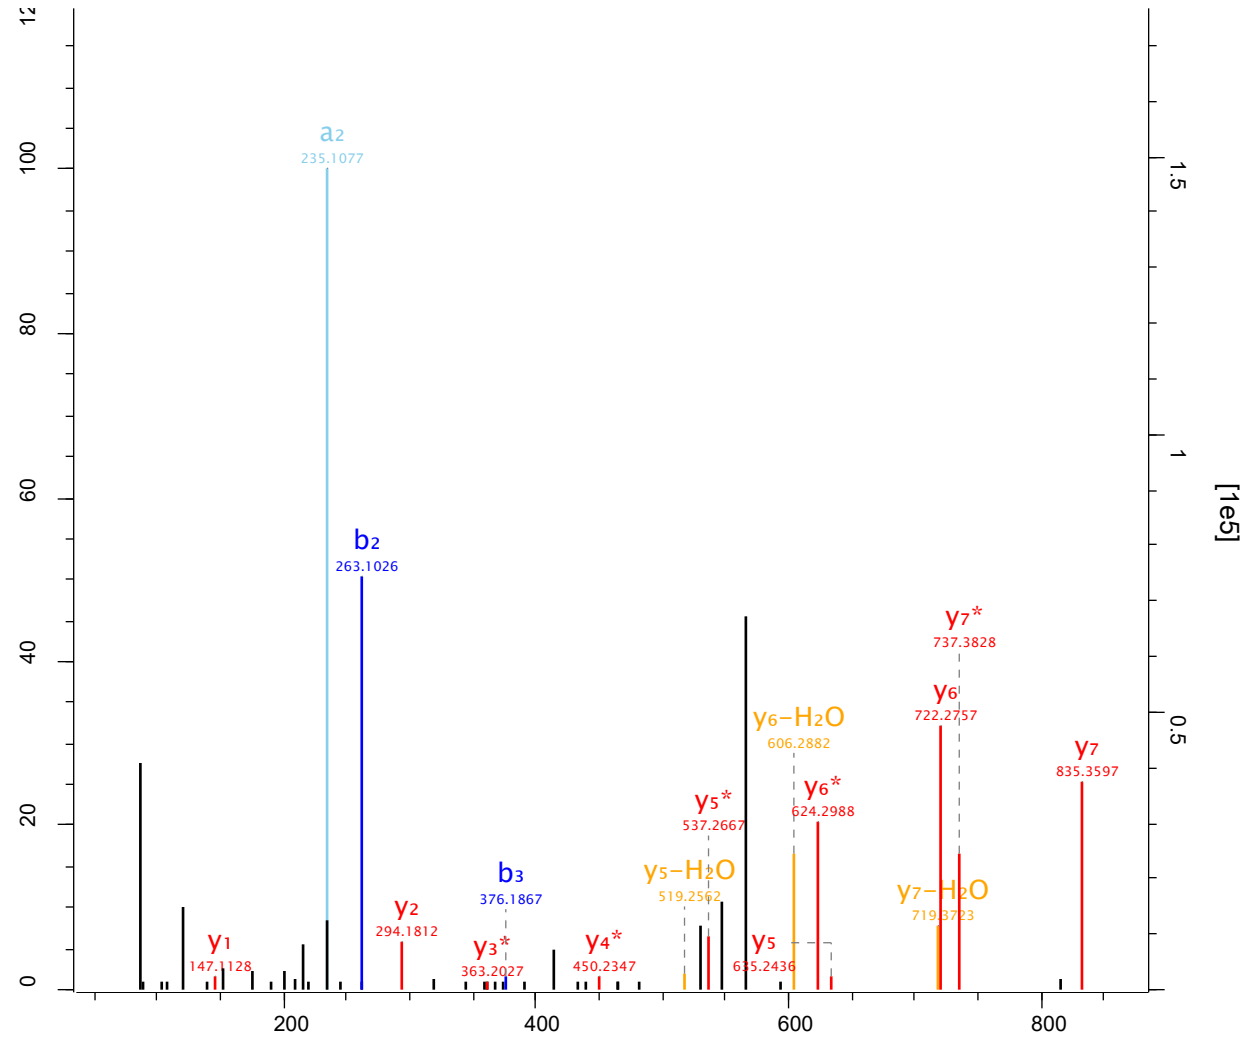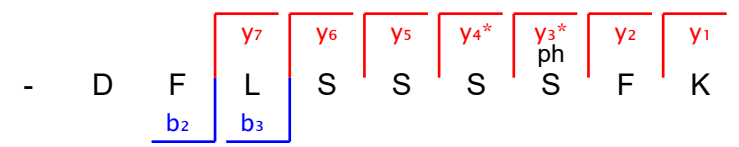

Raw file Scan Method Score m/z  
 sys\_15\_1 3002 FTMS; HCD 93.78 871.78

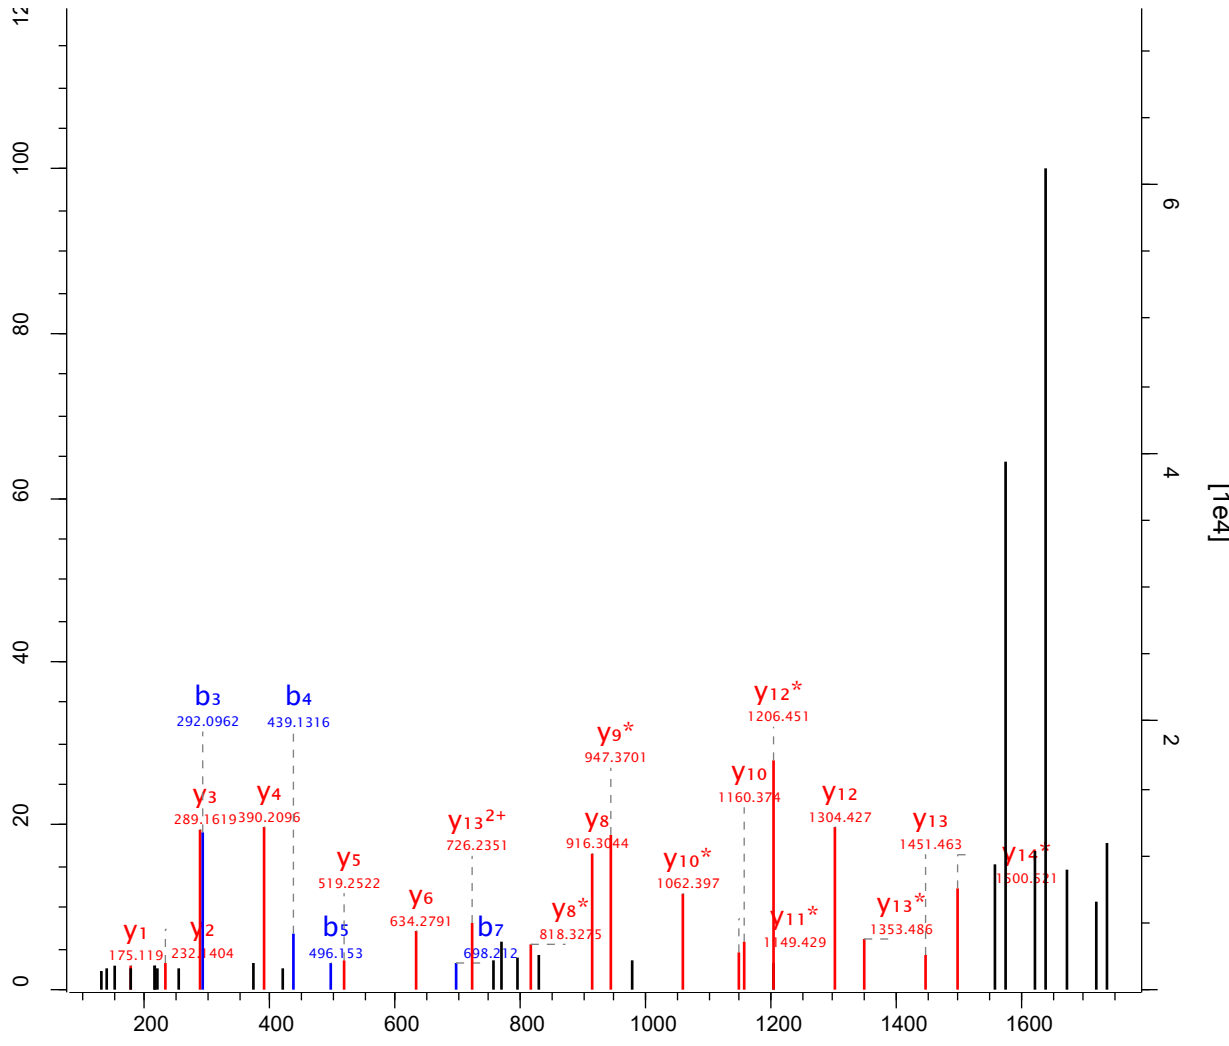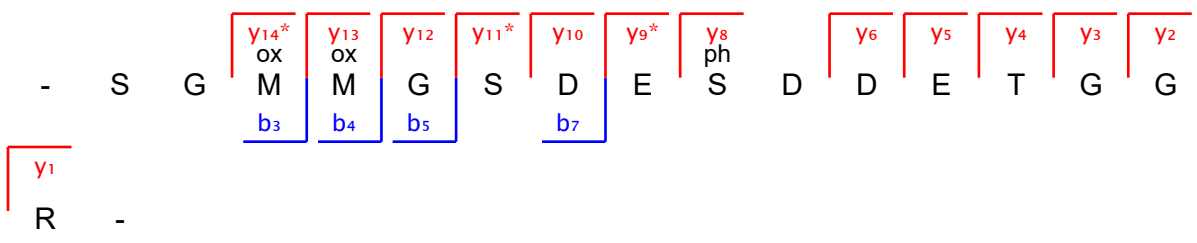

Raw file Scan Method Score m/z  
 sys\_15\_1 30040 FTMS; HCD 50.75 724.65

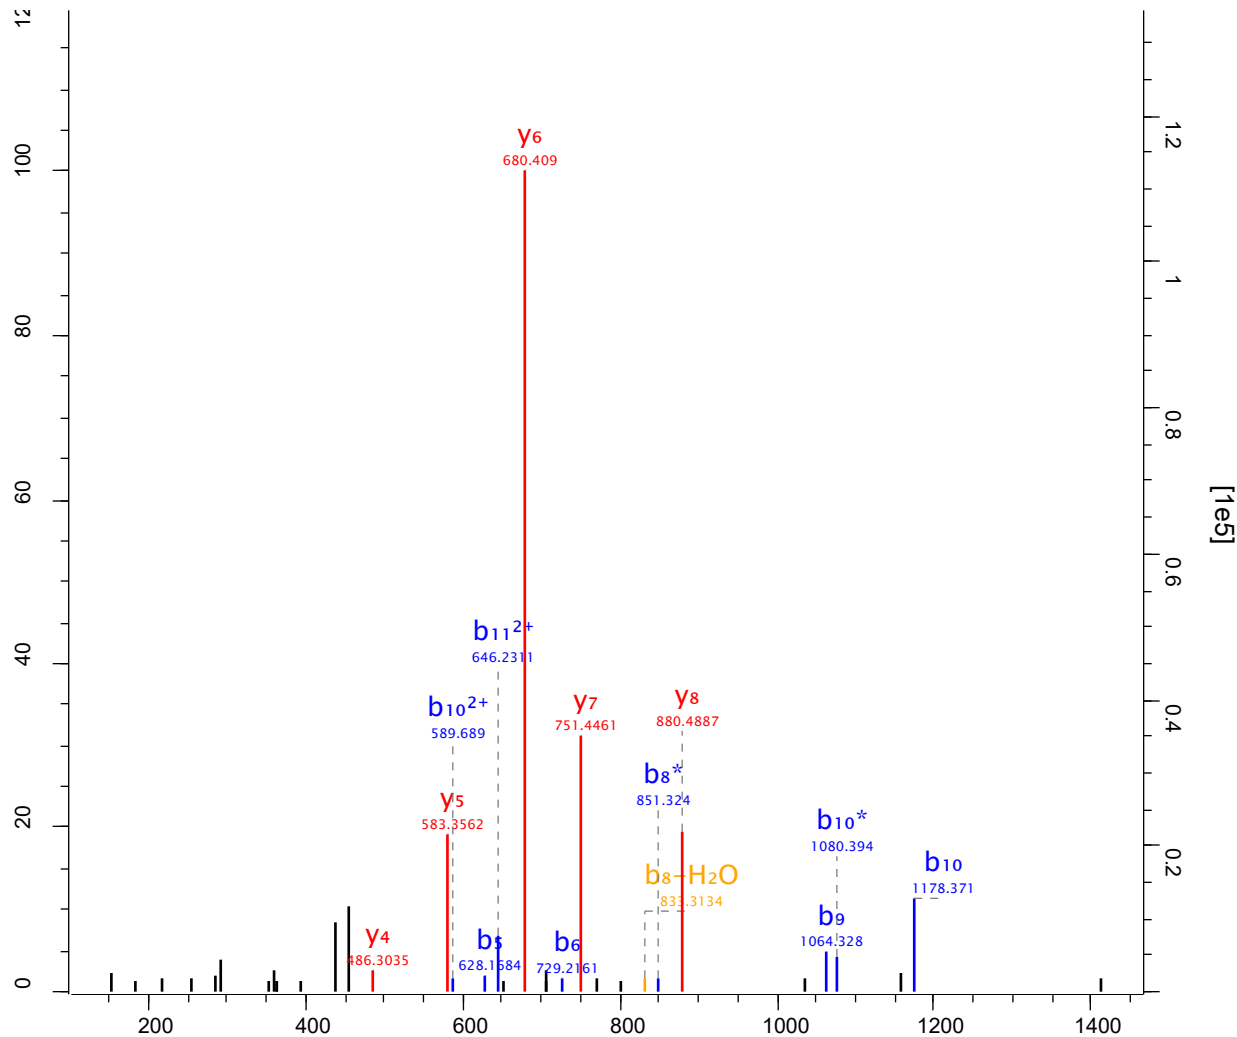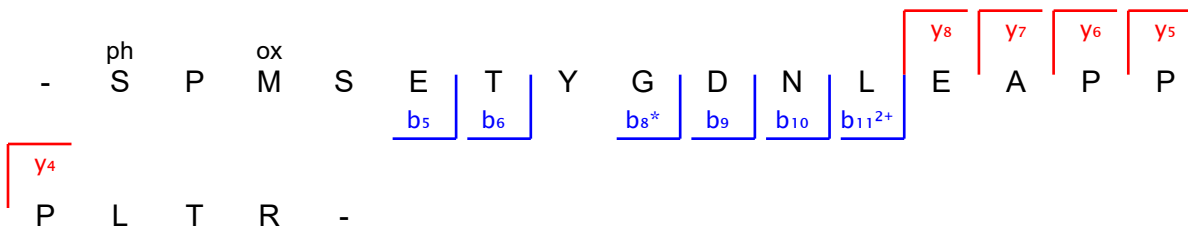



Raw file Scan Method Score m/z  
 sys\_15\_1 30146 FTMS; HCD 285.5 827.85

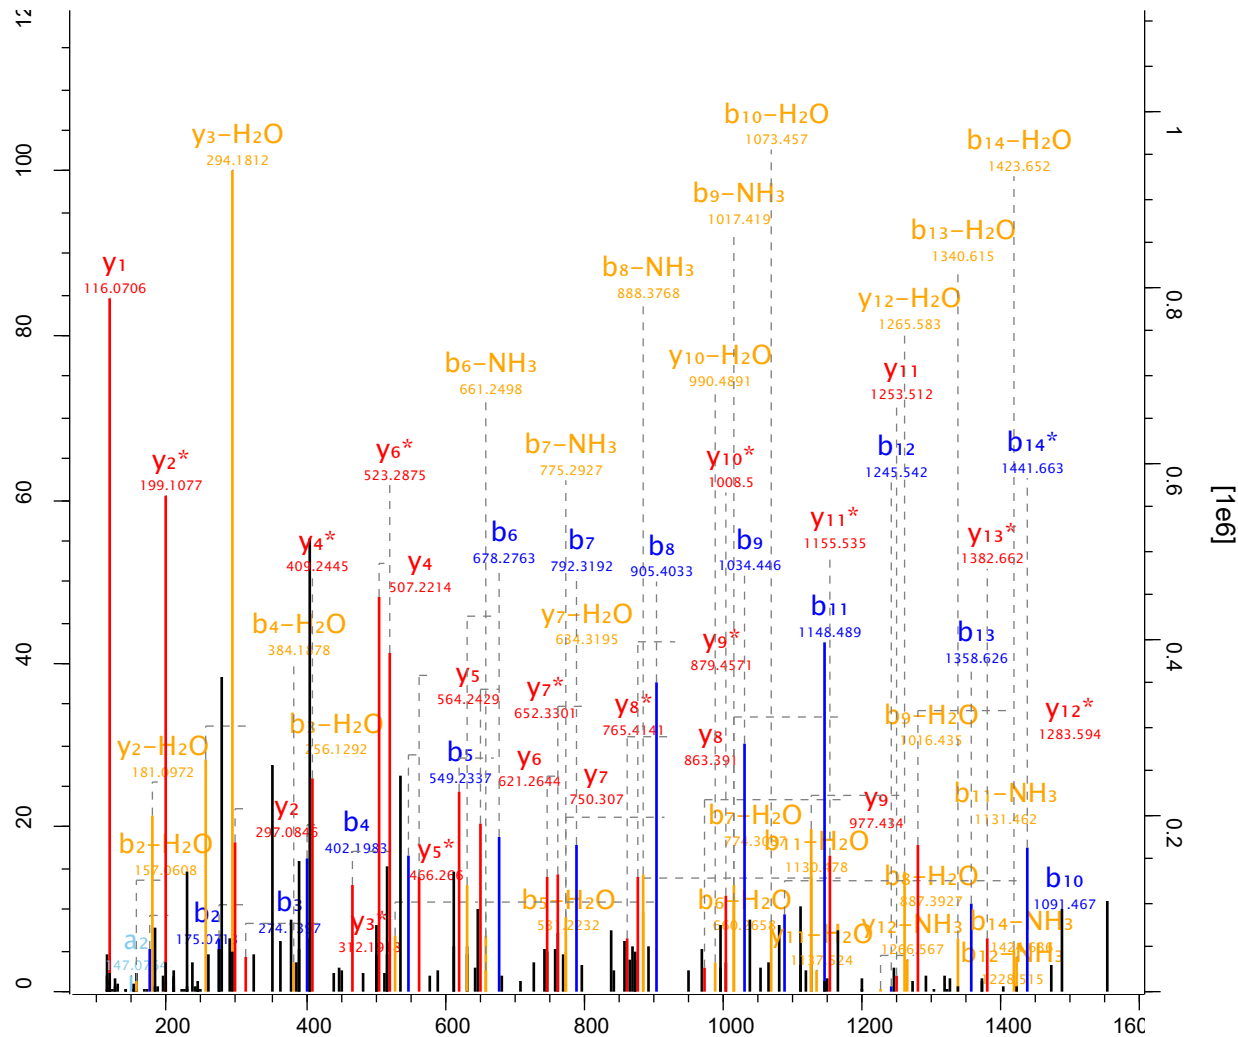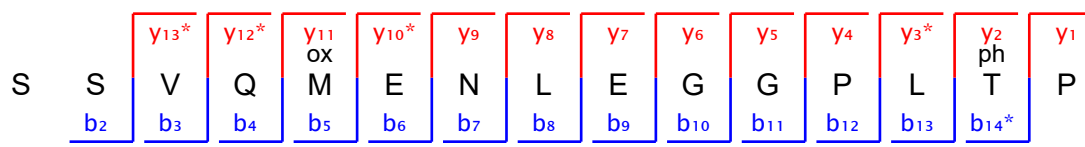



| Raw file | Scan | Method    | Score | m/z    |
|----------|------|-----------|-------|--------|
| sys_15_1 | 3021 | FTMS; HCD | 46.84 | 593.75 |

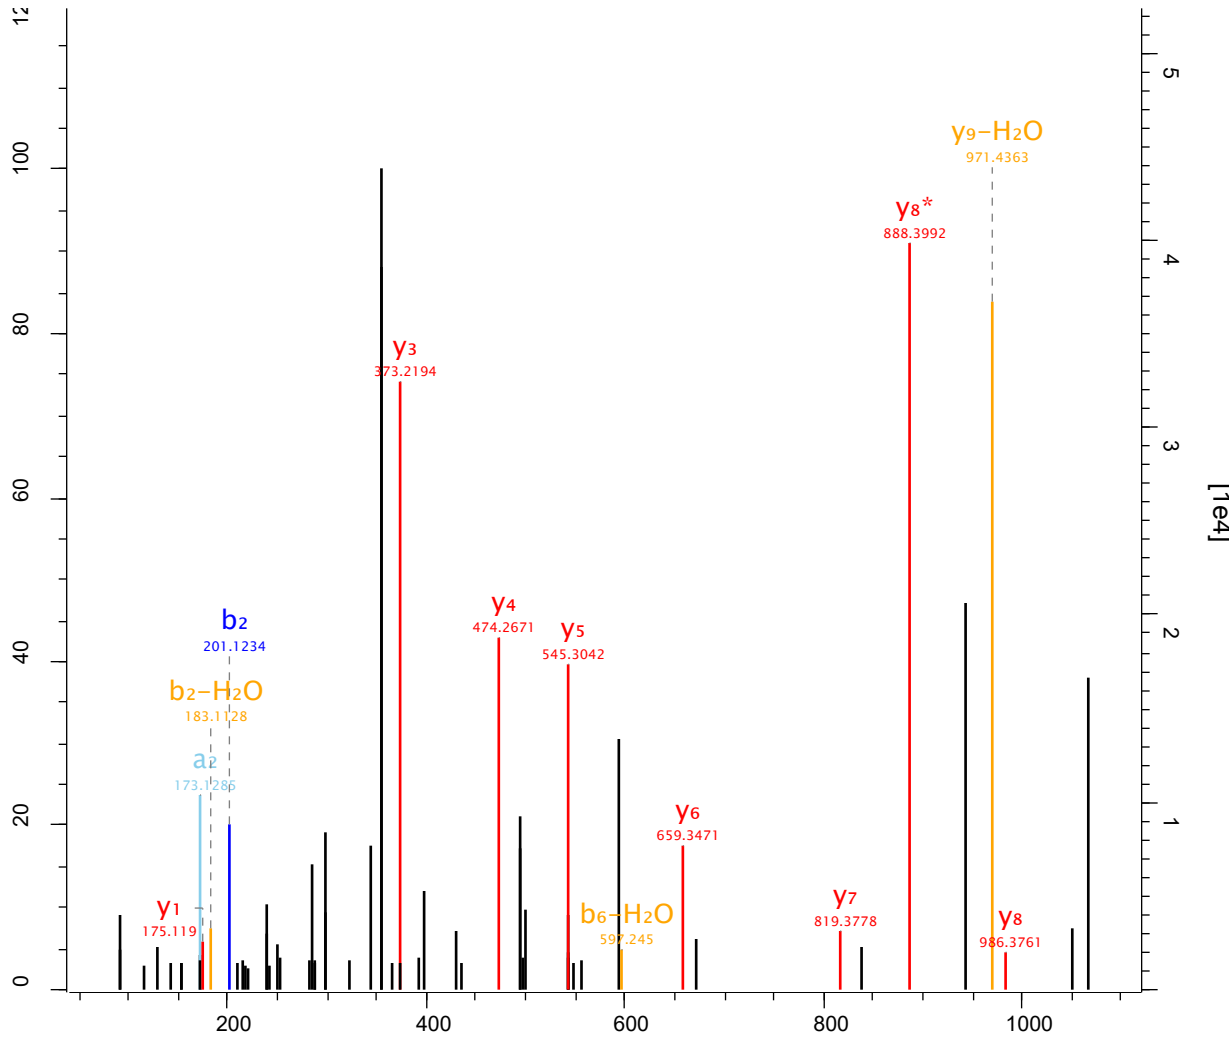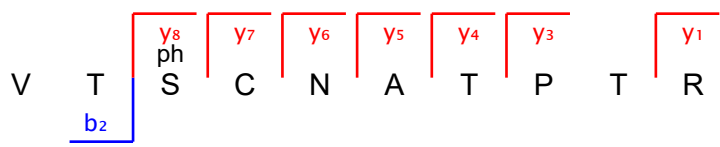

Raw file Scan Method Score m/z  
 sys\_15\_1 30232 FTMS; HCD 141.43 805.67

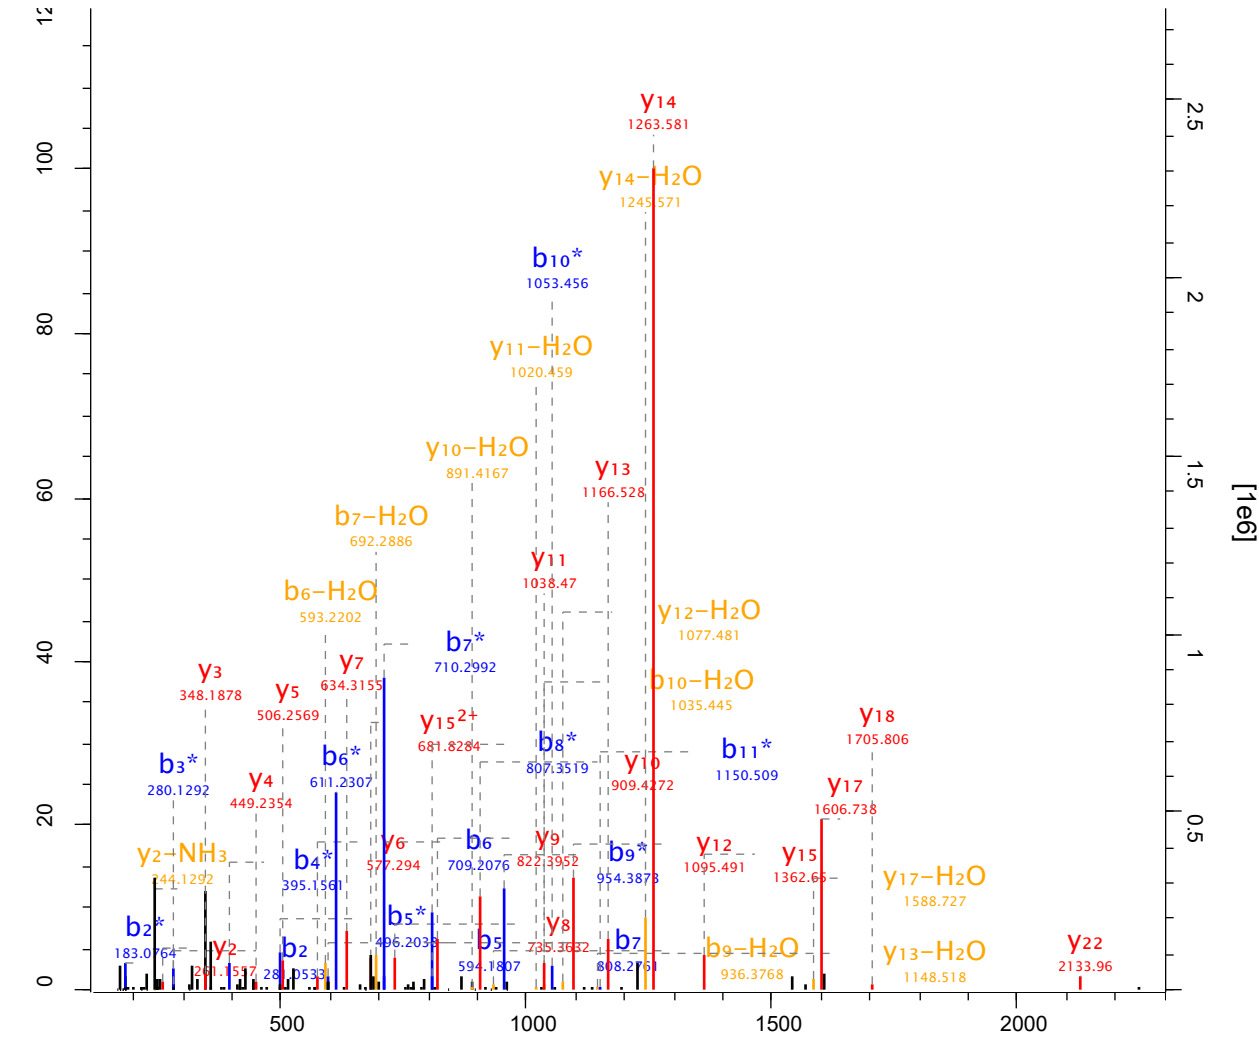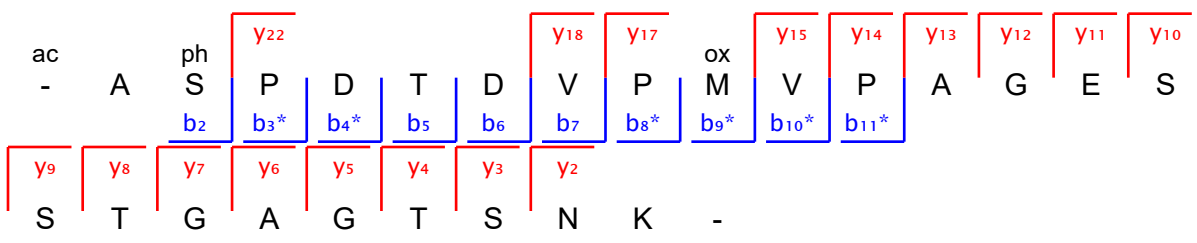

Raw file Scan Method Score m/z  
 sys\_15\_1 30420 FTMS; HCD 84.16 653.31

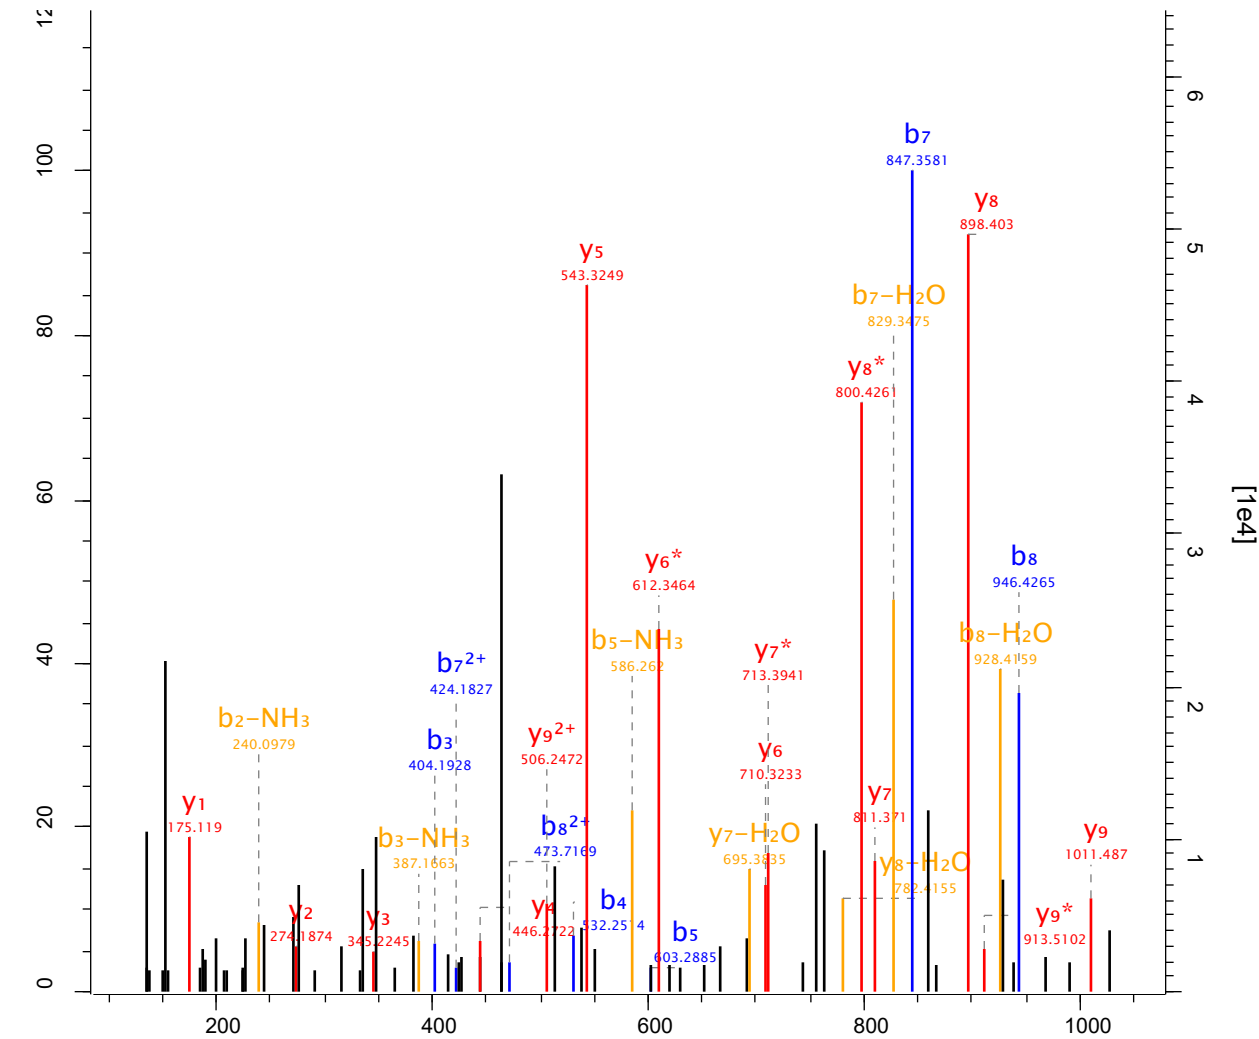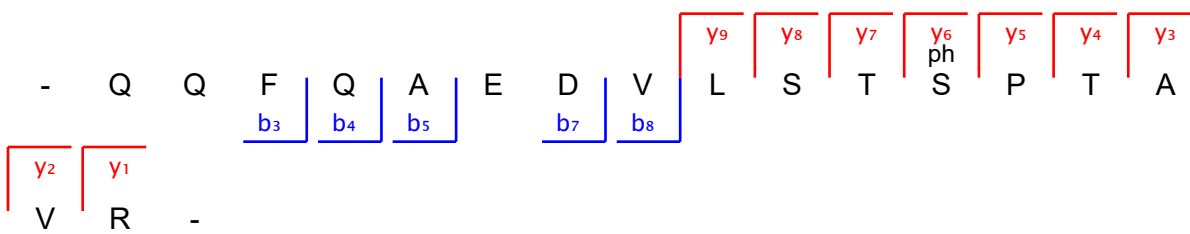

Raw file Scan Method Score m/z  
 sys\_15\_1 30426 FTMS; HCD 87.35 948.9

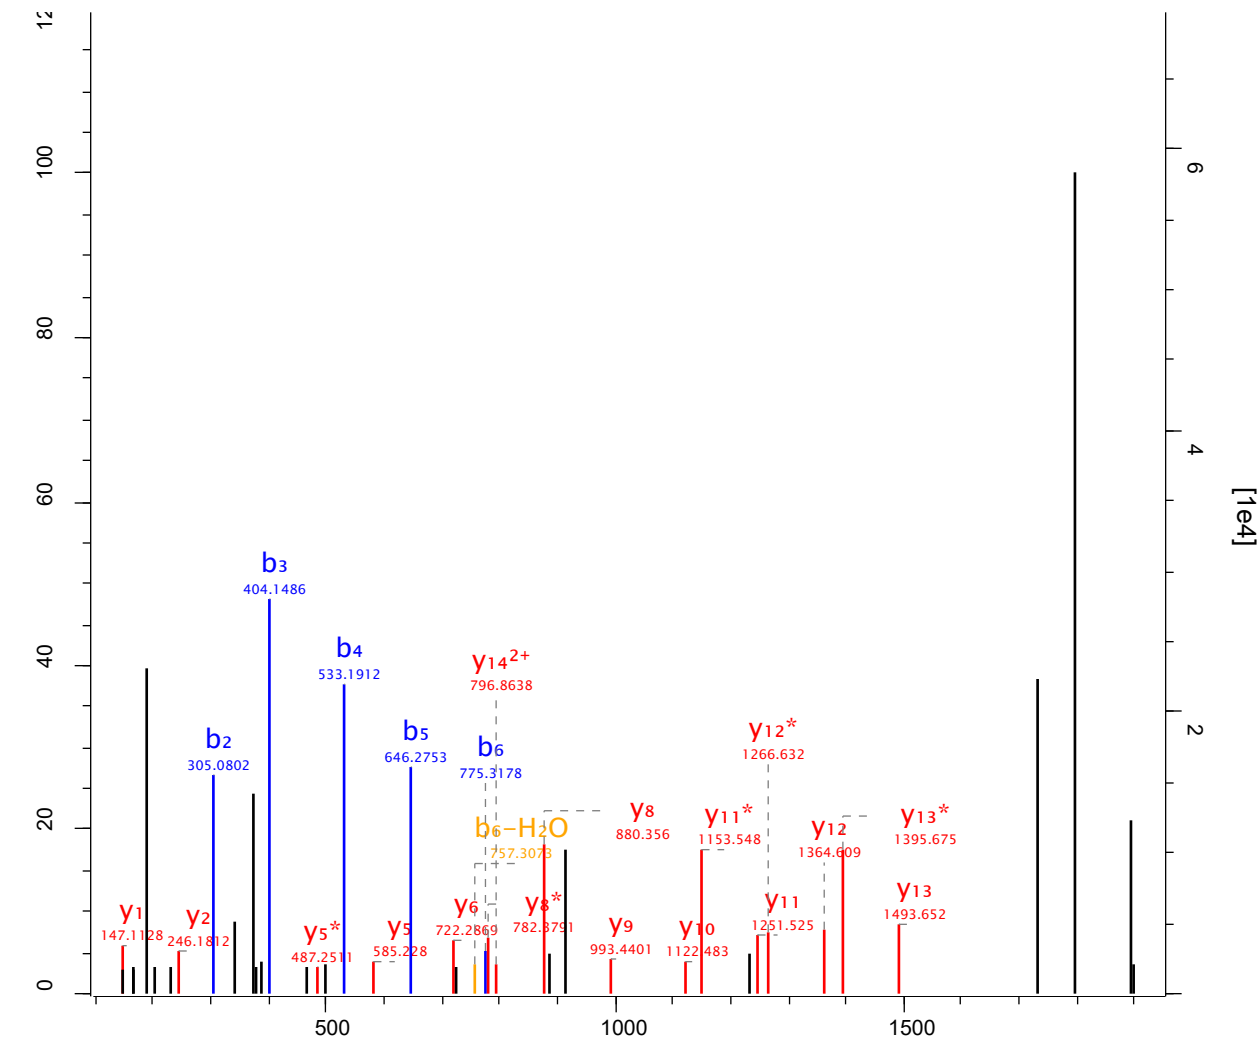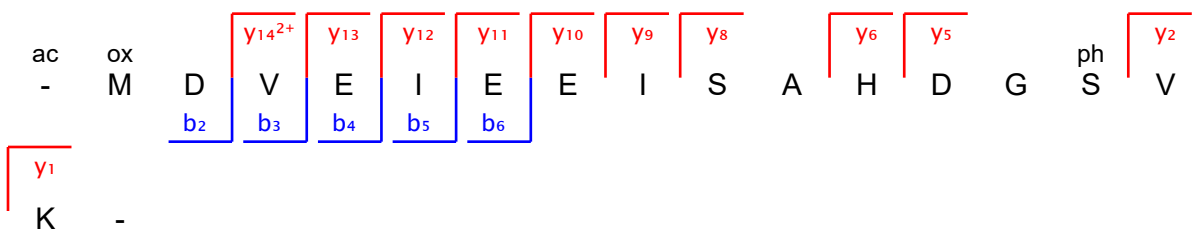

Raw file Scan Method Score m/z  
 sys\_15\_1 30464 FTMS; HCD 55.71 926.41

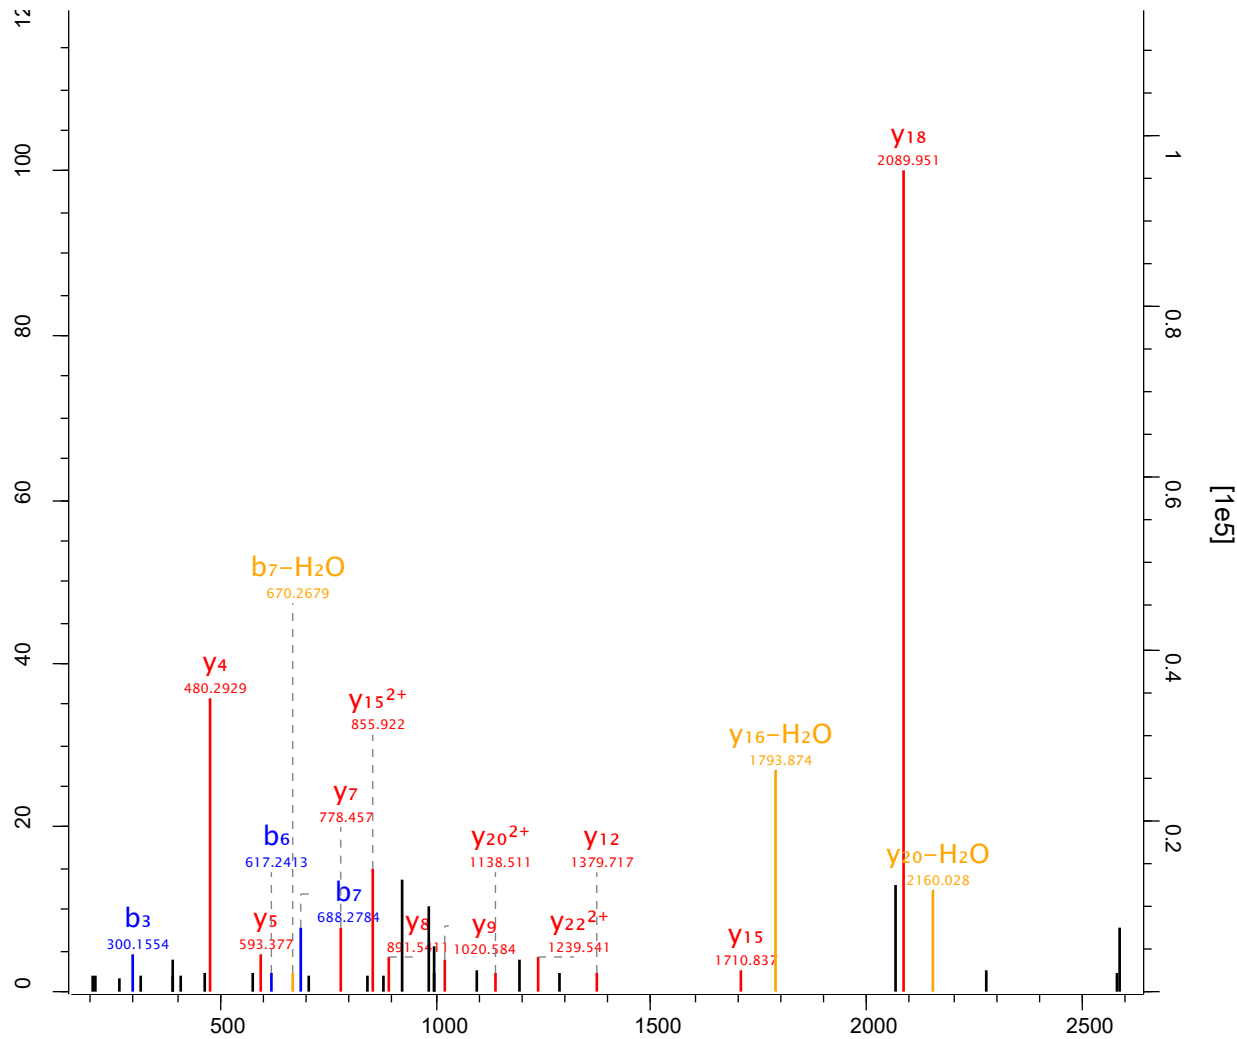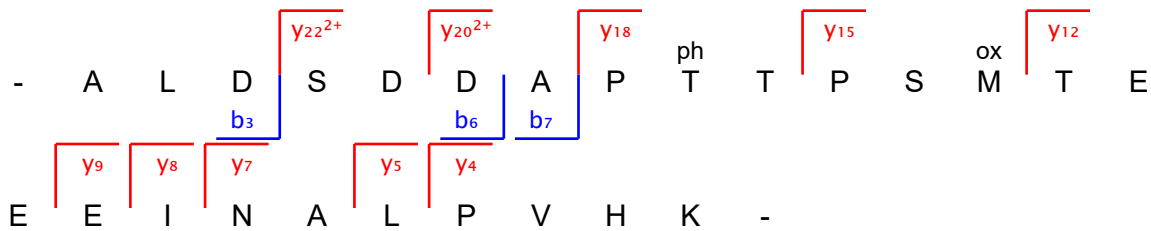

Raw file Scan Method Score m/z  
 sys\_15\_1 30524 FTMS; HCD 91.62 755.87

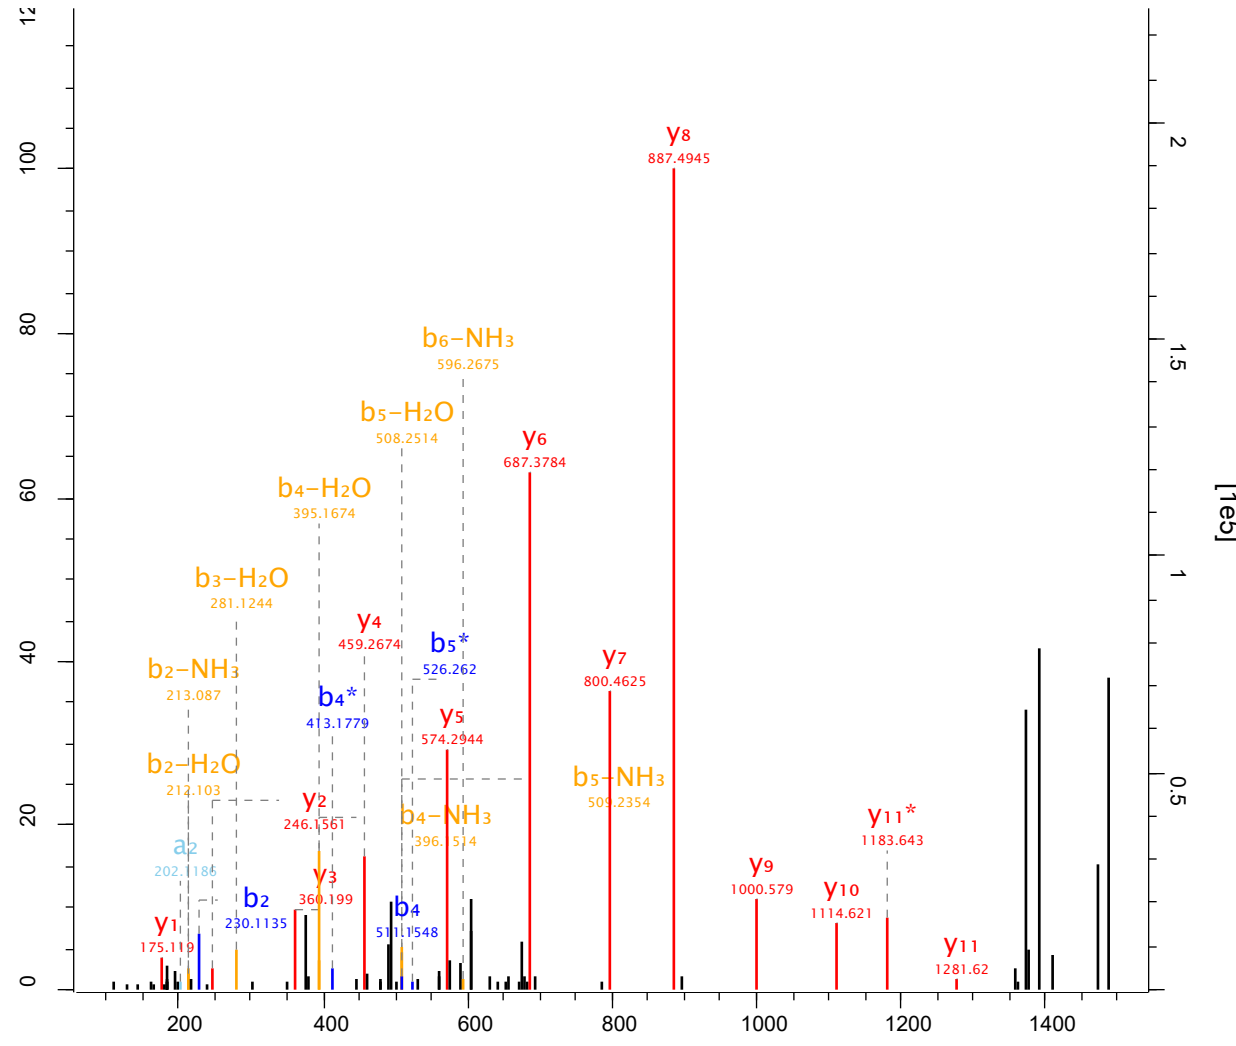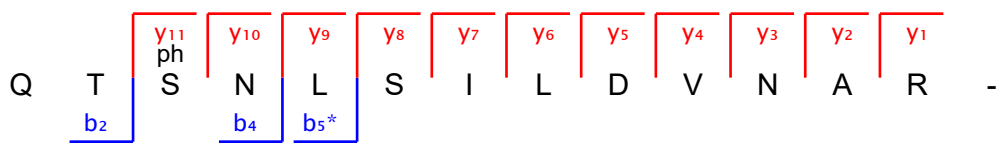

Raw file Scan Method Score m/z  
 sys\_15\_1 30549 FTMS; HCD 114.46 901.91

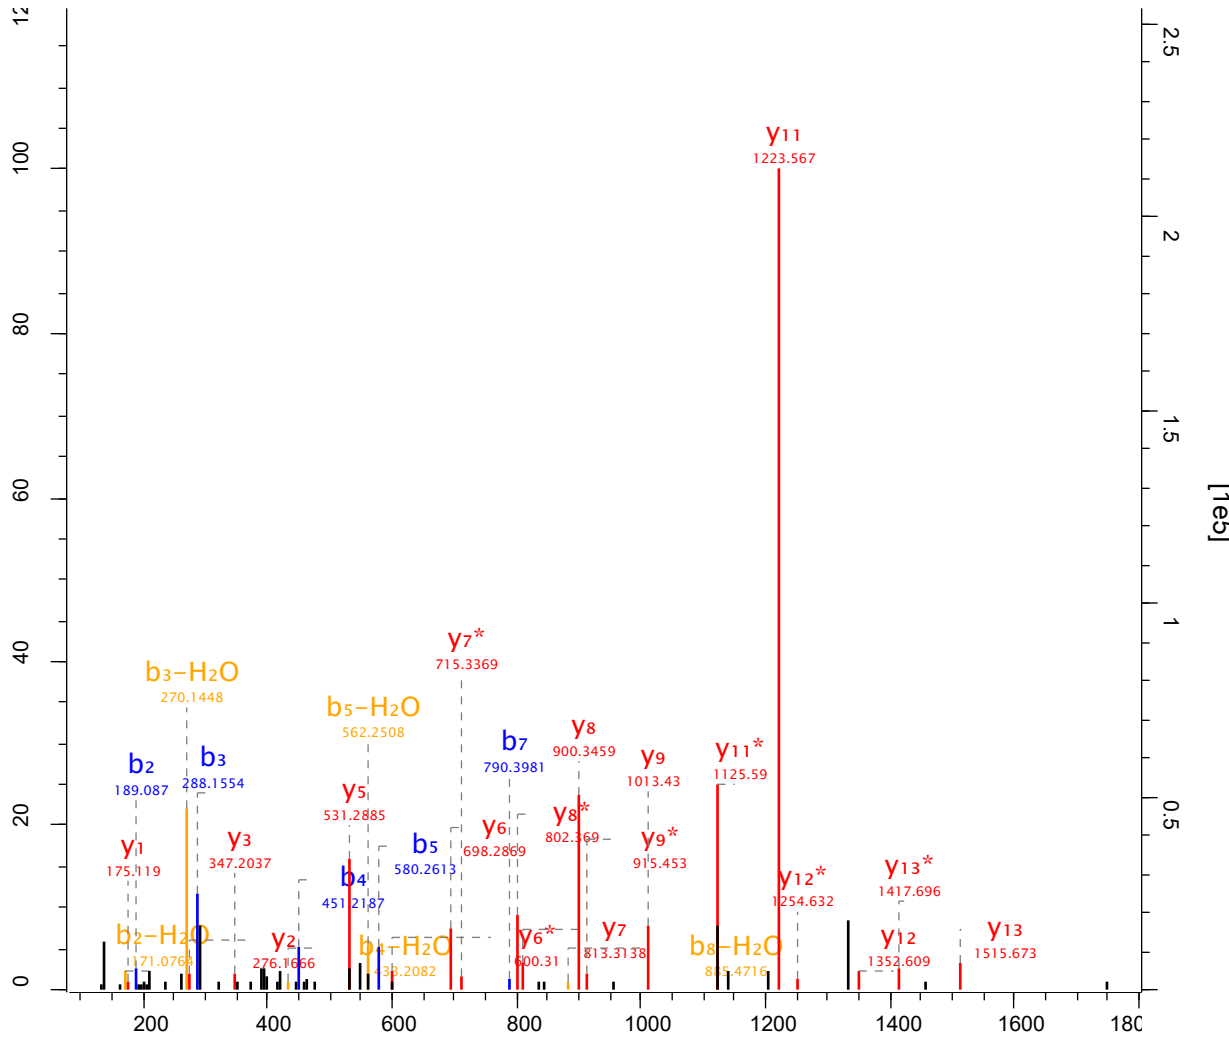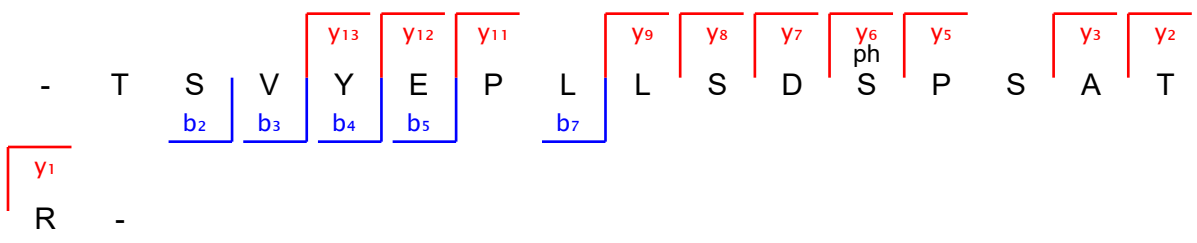

Raw file Scan Method Score m/z  
 sys\_15\_1 30603 FTMS; HCD 46.88 607.78

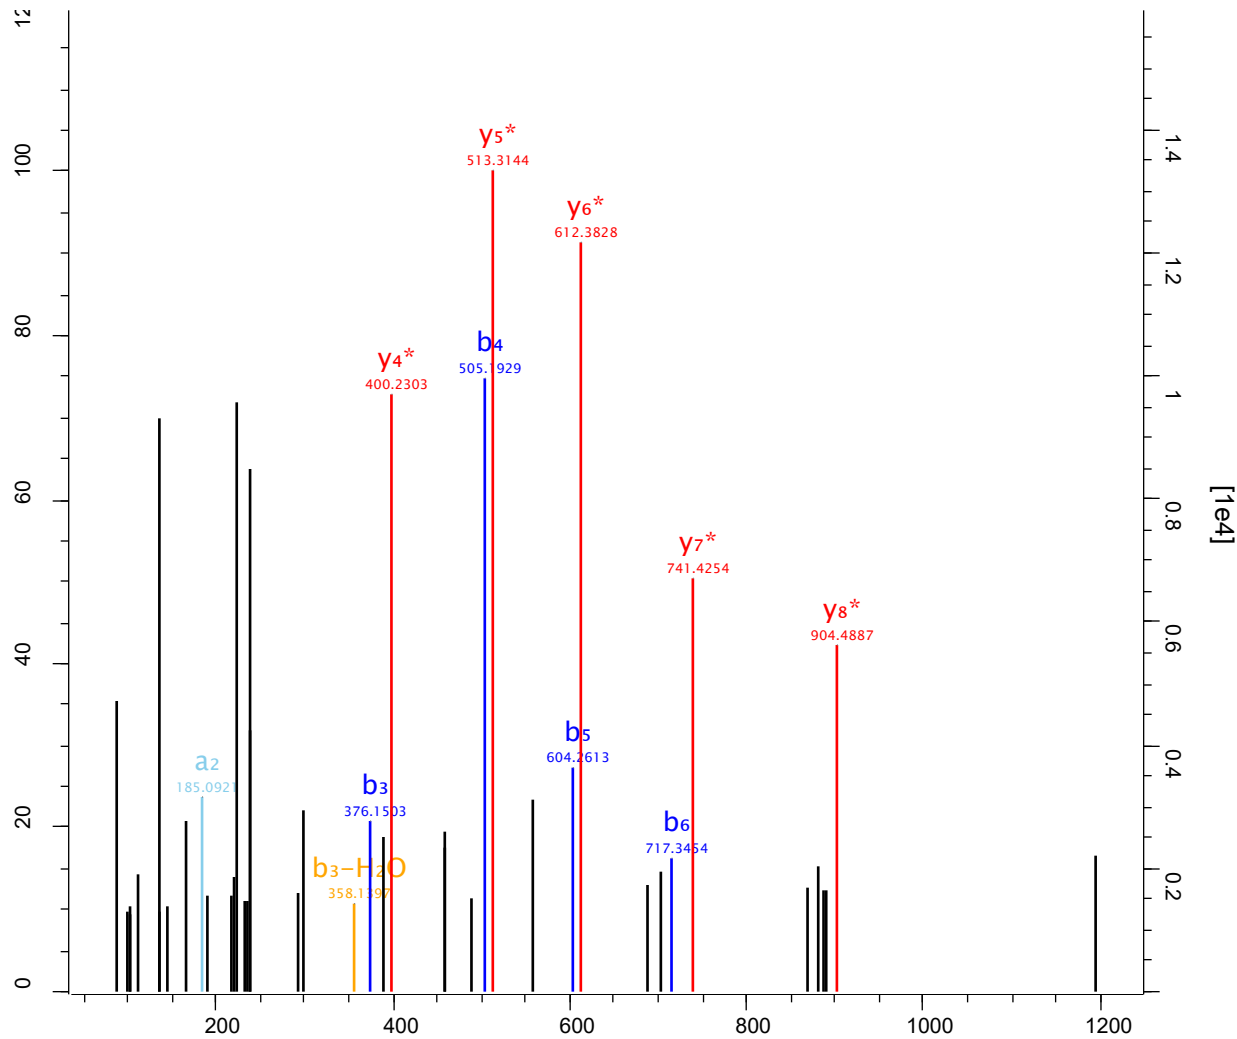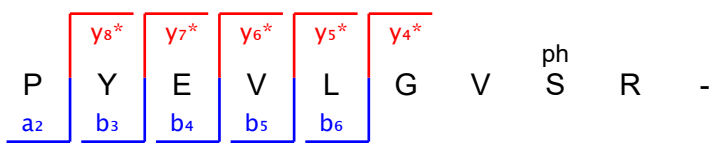



Raw file Scan Method Score m/z  
 sys\_15\_1 30651 FTMS; HCD 208.28 642.29

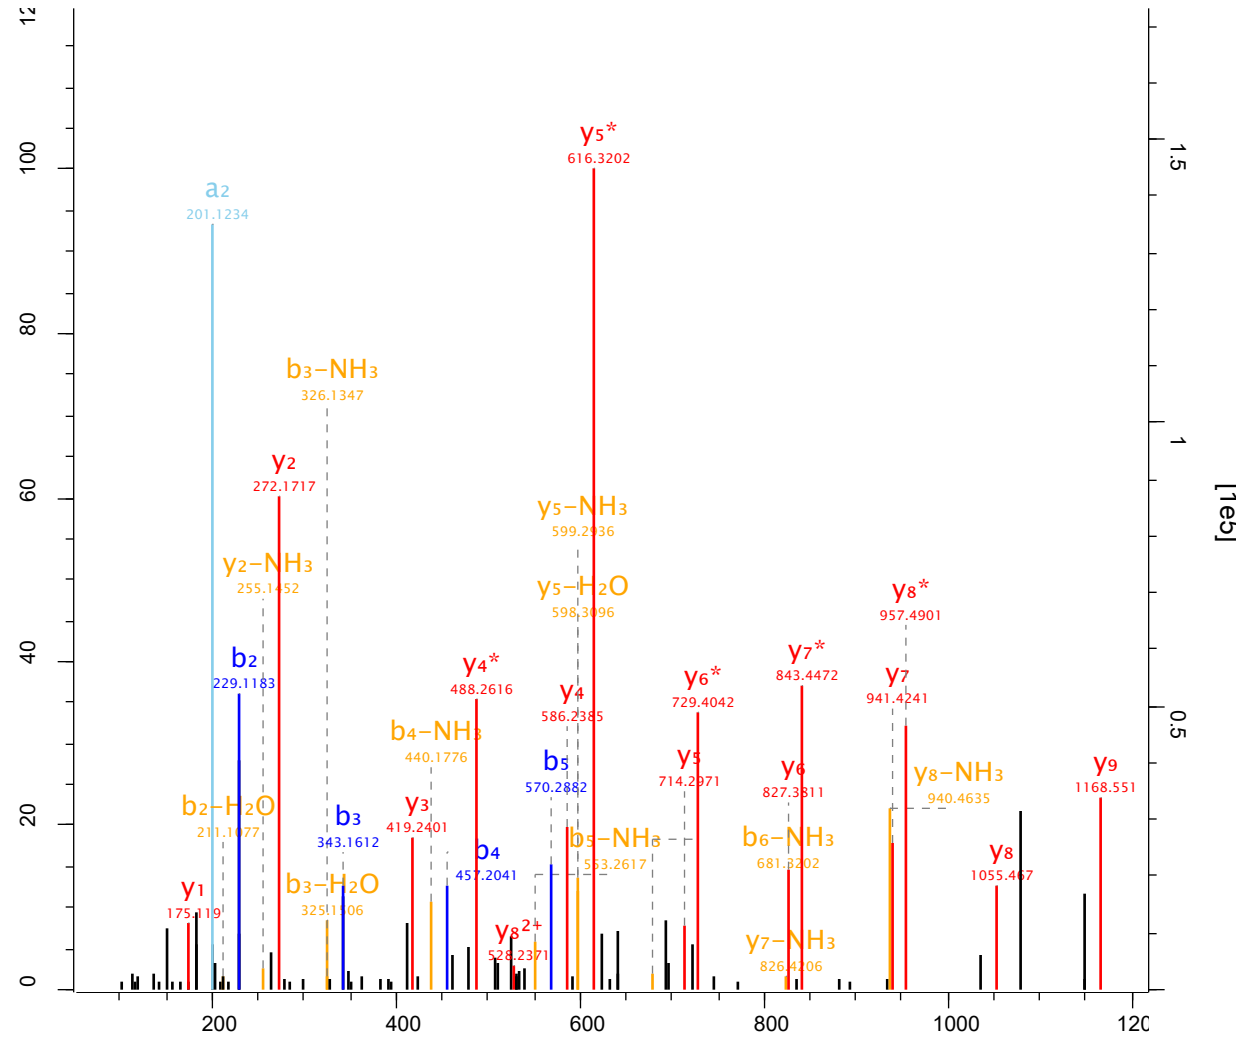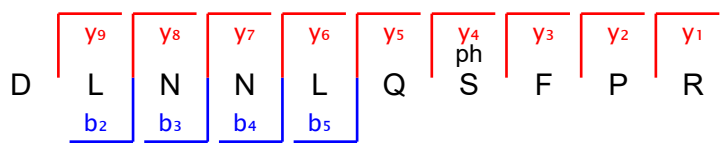

Raw file Scan Method Score m/z  
 sys\_15\_1 30662 FTMS; HCD 181.4 924.35

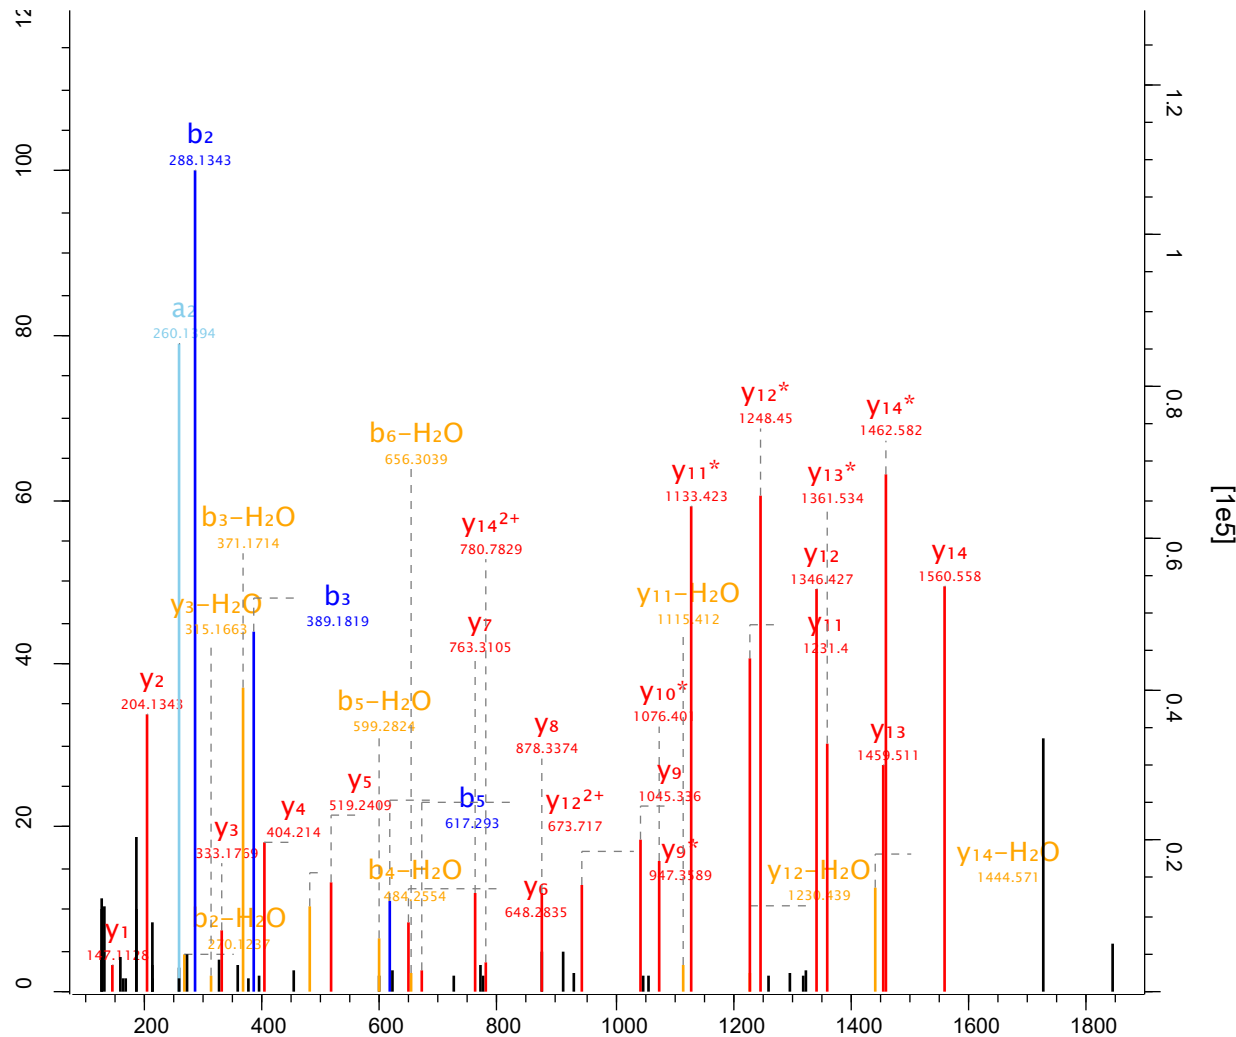

- T W T L D G E S D D E D A E G  
 b2 b3 b5  
 y1  
 K -

Raw file Scan Method Score m/z  
 sys\_15\_1 30668 FTMS; HCD 91.96 545.76

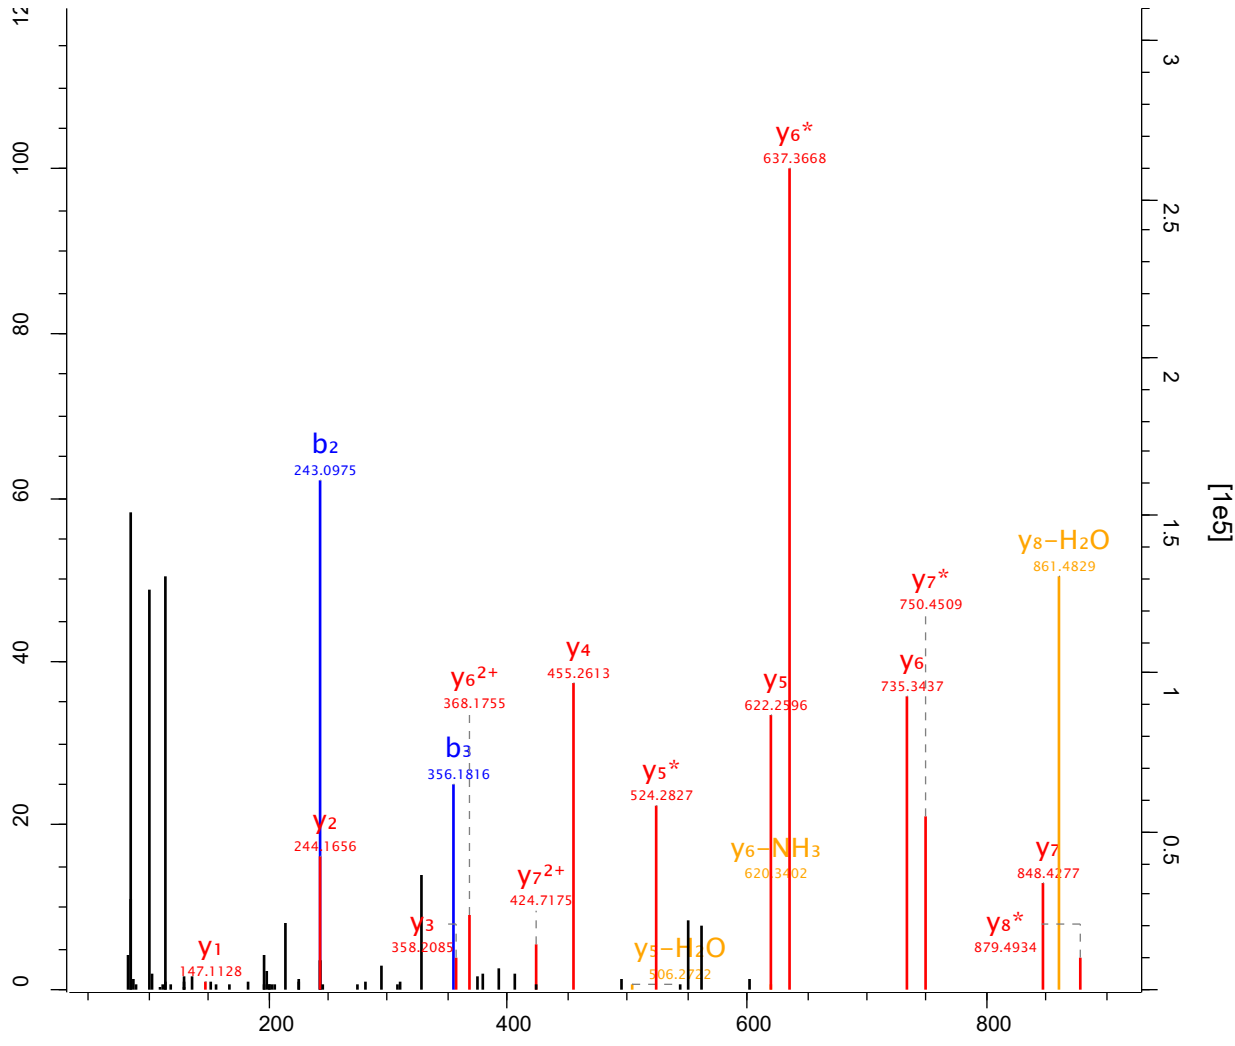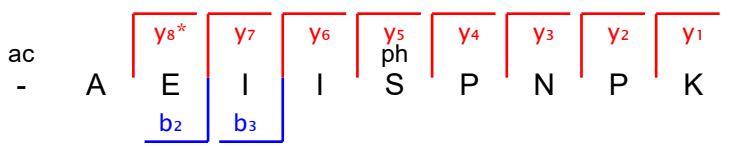

Raw file Scan Method Score m/z  
 sys\_15\_1 30685 FTMS; HCD 64.22 583.81

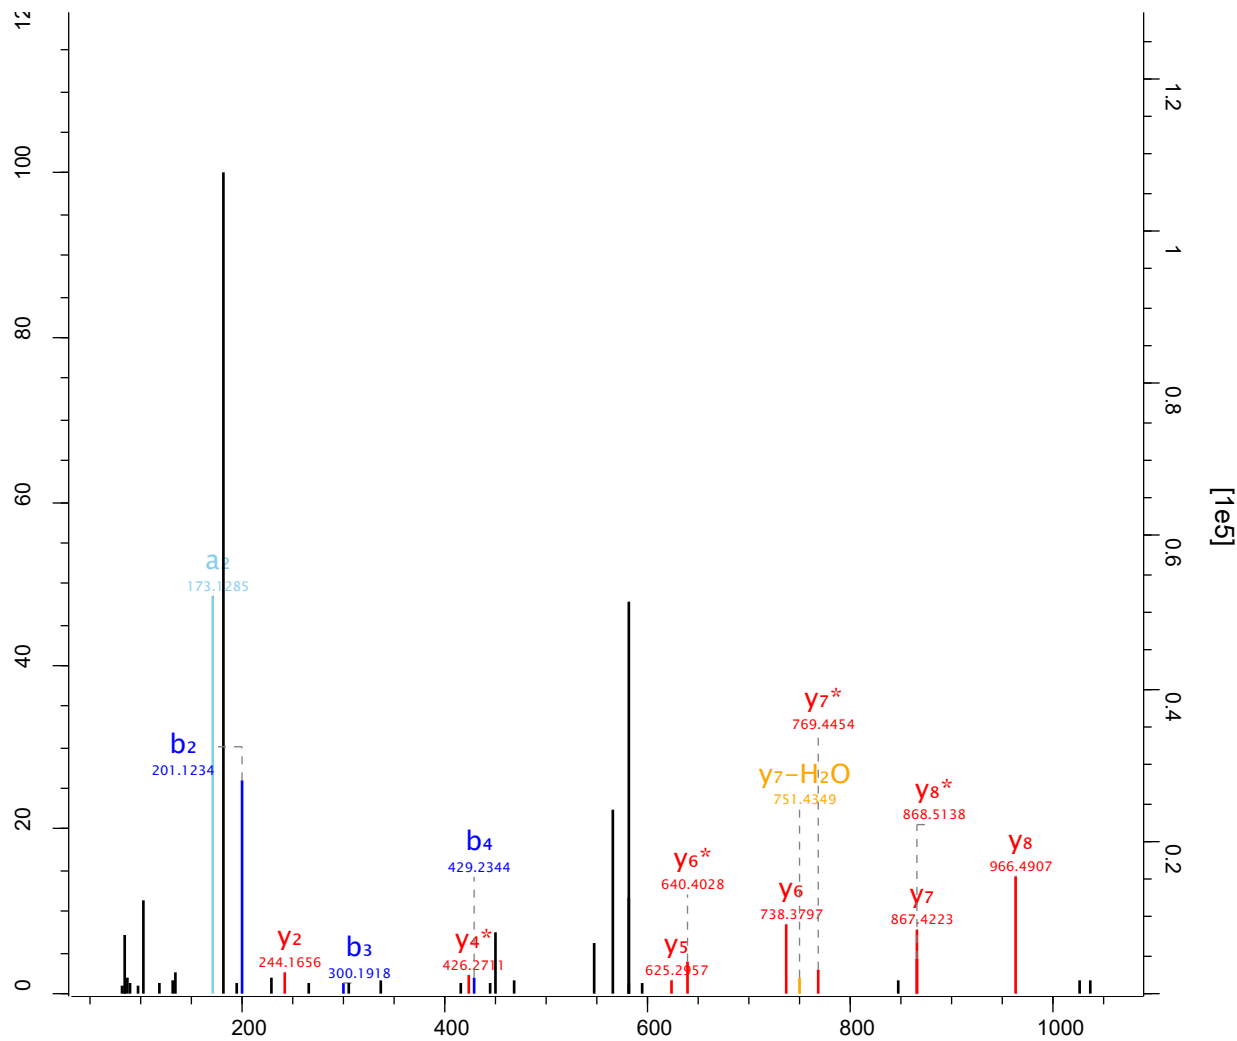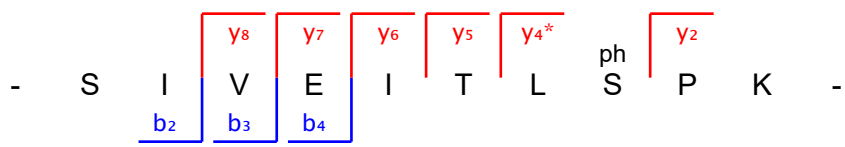

Raw file Scan Method Score m/z  
 sys\_15\_1 30778 FTMS; HCD 136.64 851.37

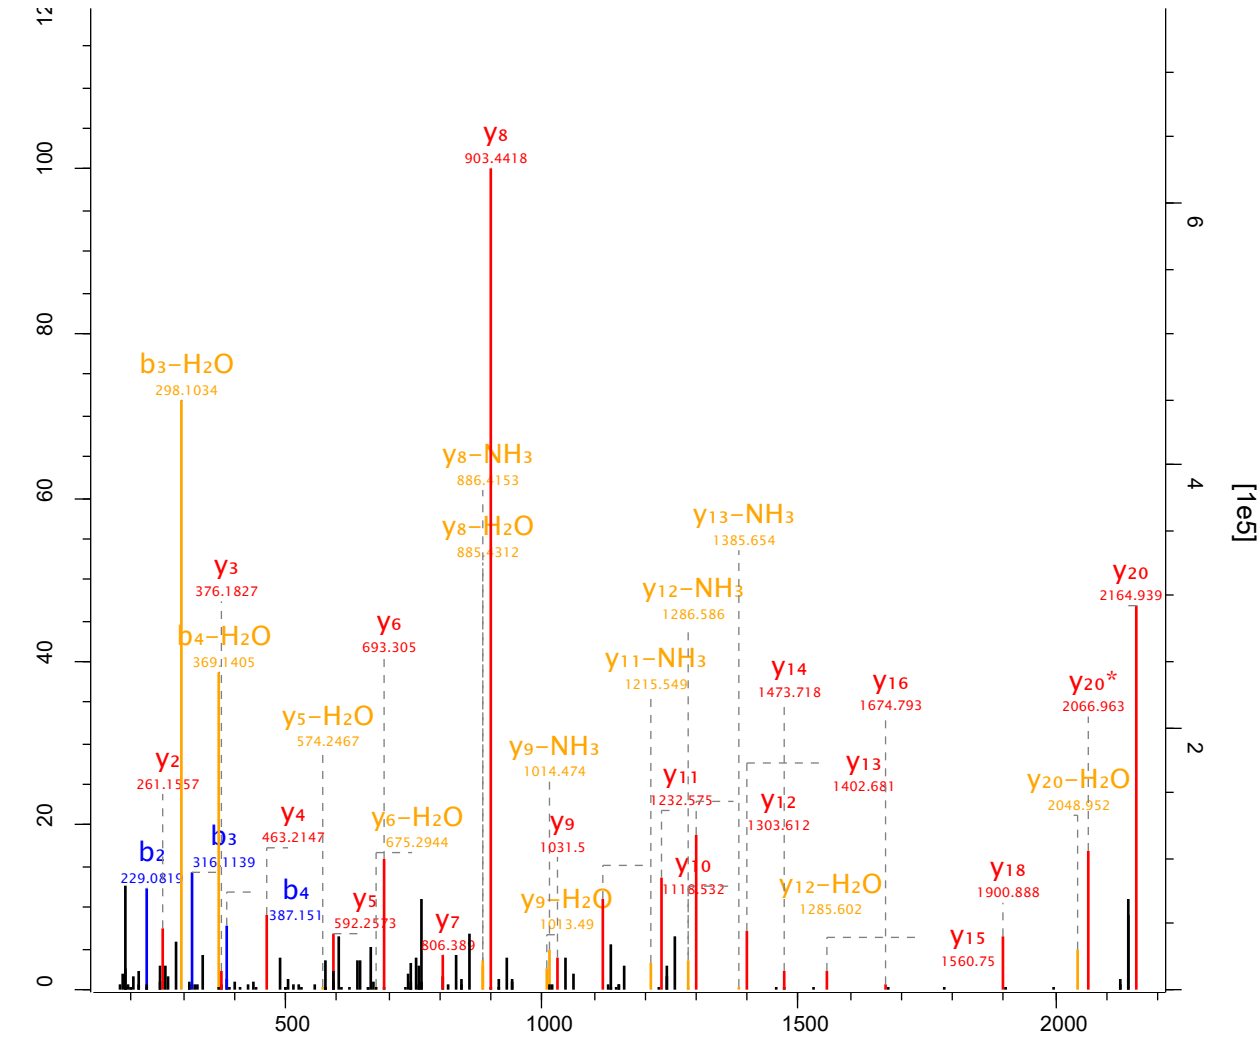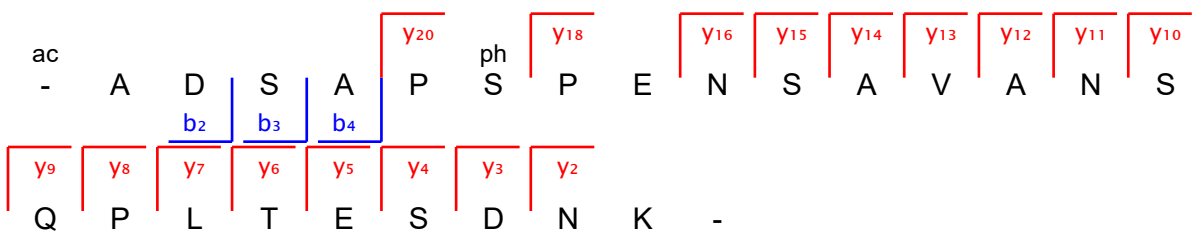

Raw file sys\_15\_1 Scan 30825 Method FTMS; HCD Score 154.69 m/z 773.33

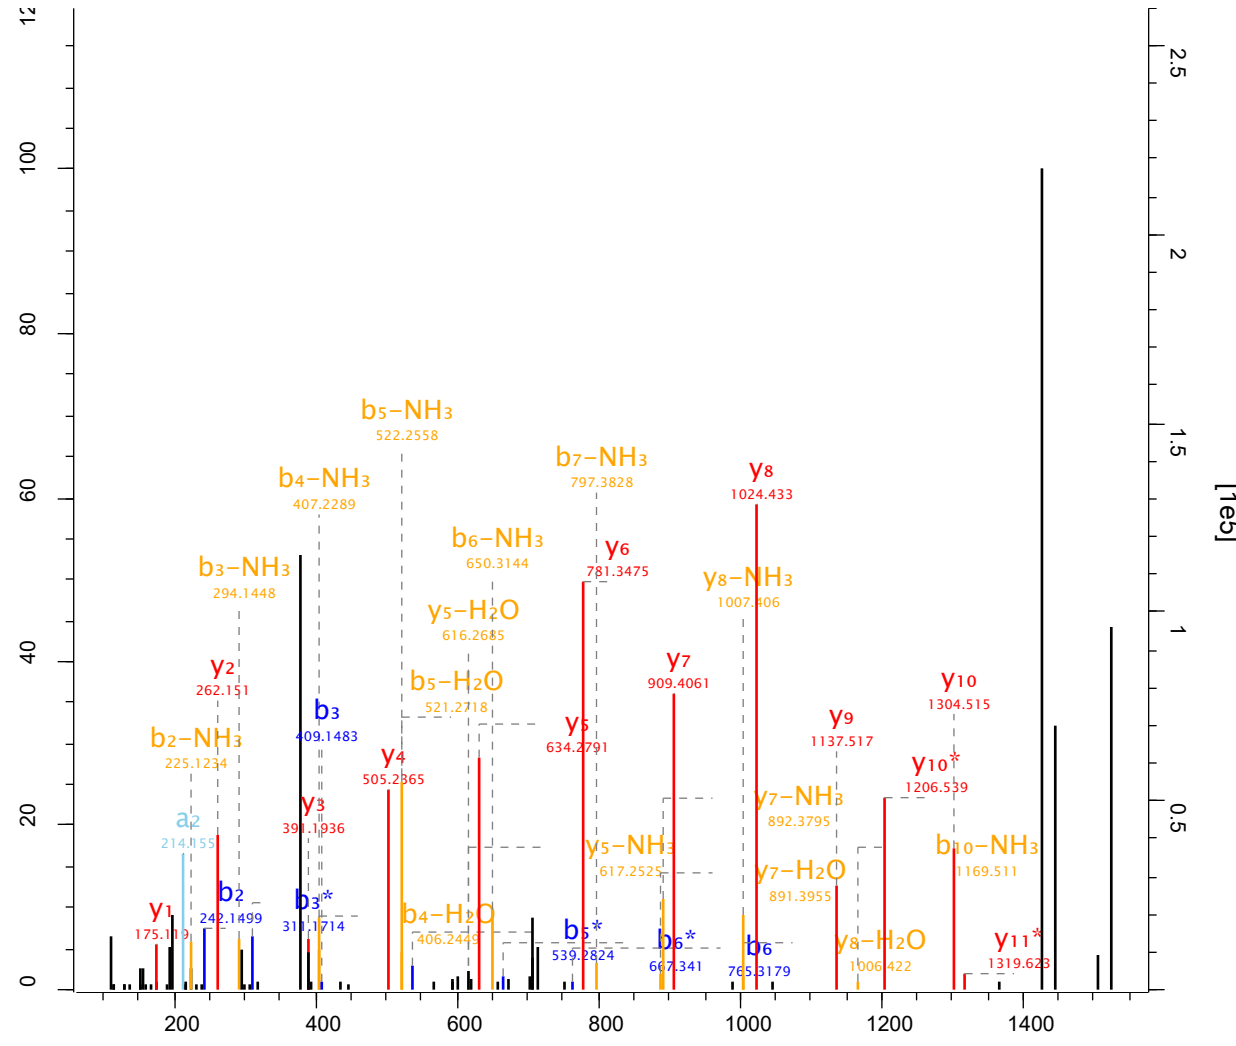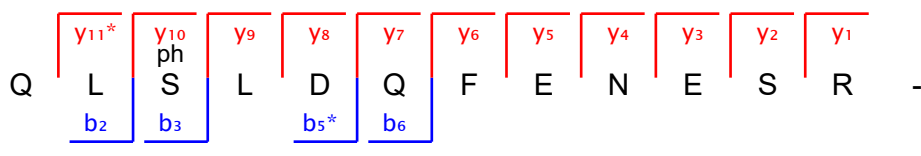

Raw file Scan Method Score m/z  
 sys\_15\_1 30853 FTMS; HCD 140.73 864.35

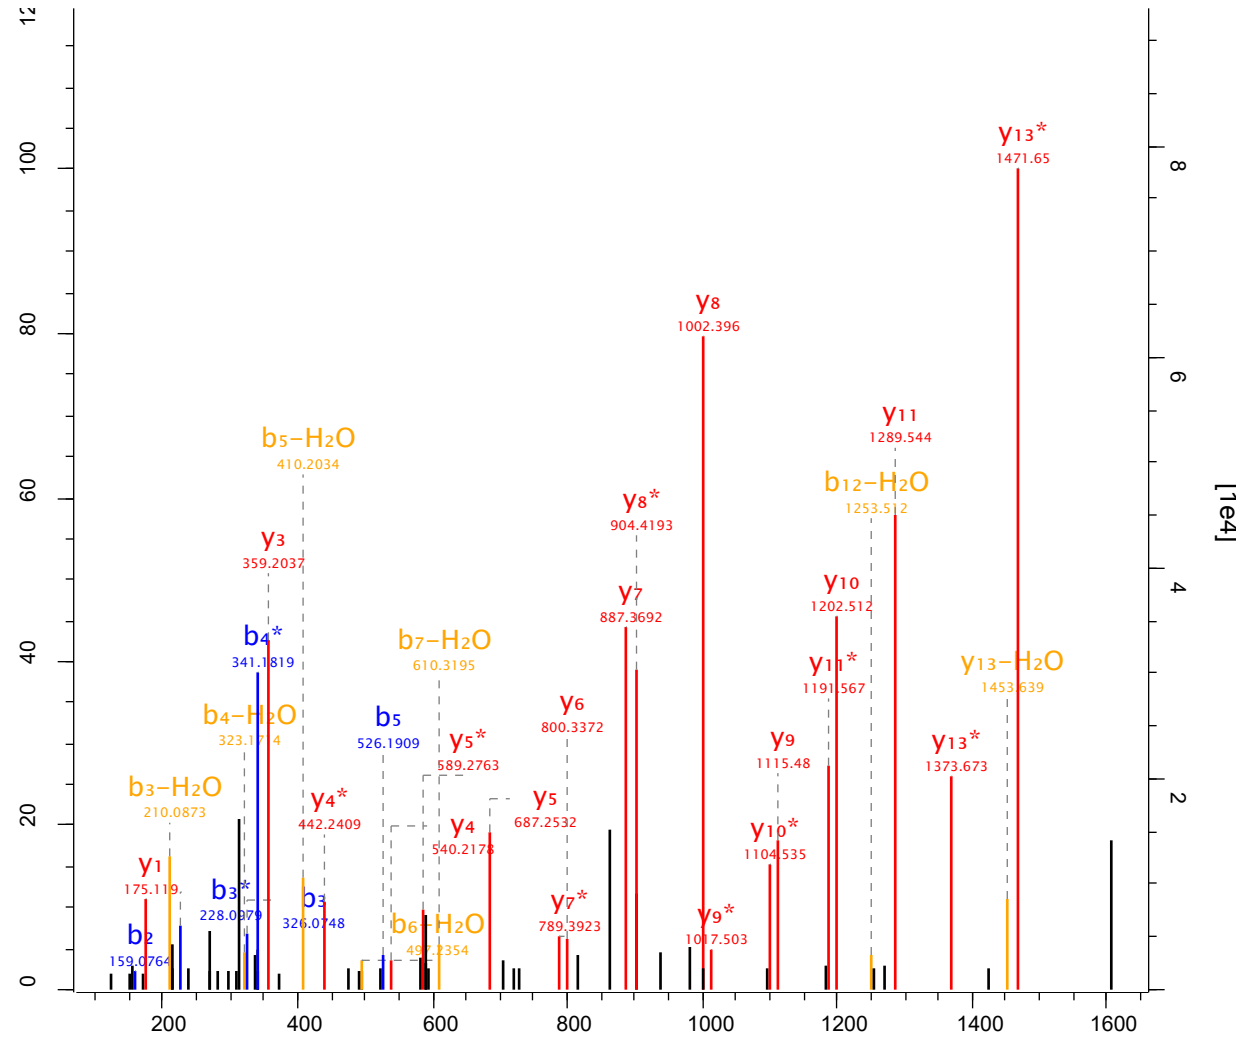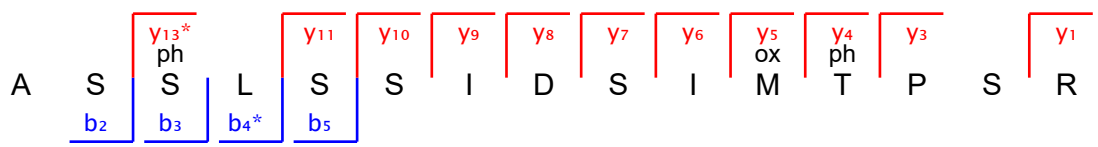

Raw file Scan Method Score m/z  
 sys\_15\_1 30880 FTMS; HCD 275.69 977.38

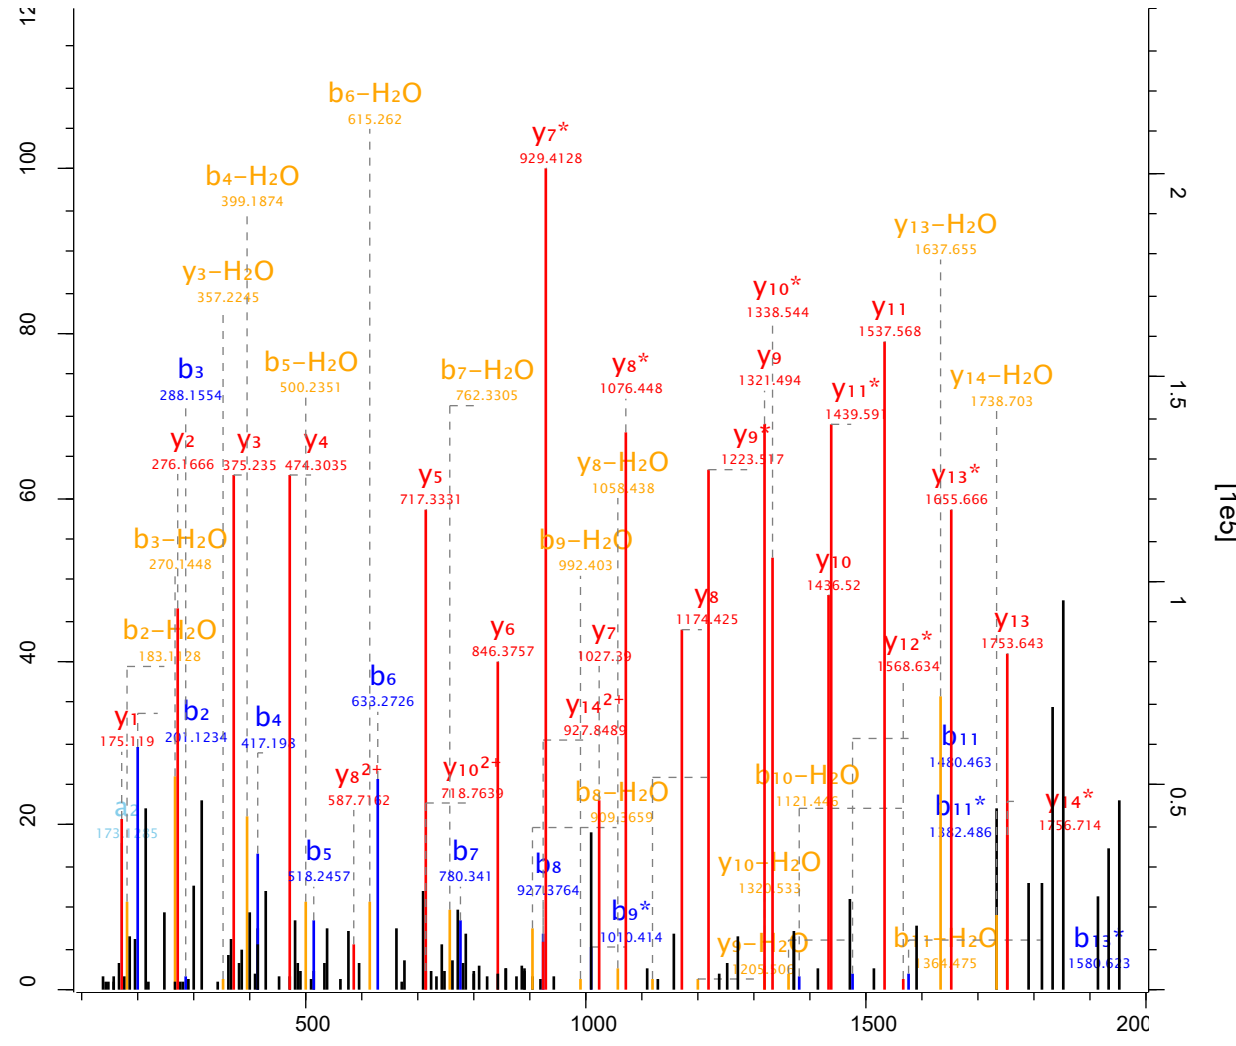

V T S E T D F M T E Y V V T R  
 b<sub>2</sub> b<sub>3</sub> b<sub>4</sub> b<sub>5</sub> b<sub>6</sub> b<sub>7</sub> b<sub>8</sub> b<sub>9</sub><sup>\*</sup> b<sub>11</sub> b<sub>13</sub><sup>\*</sup>



Raw file Scan Method Score m/z  
 sys\_15\_1 3111 FTMS; HCD 66.06 451.69

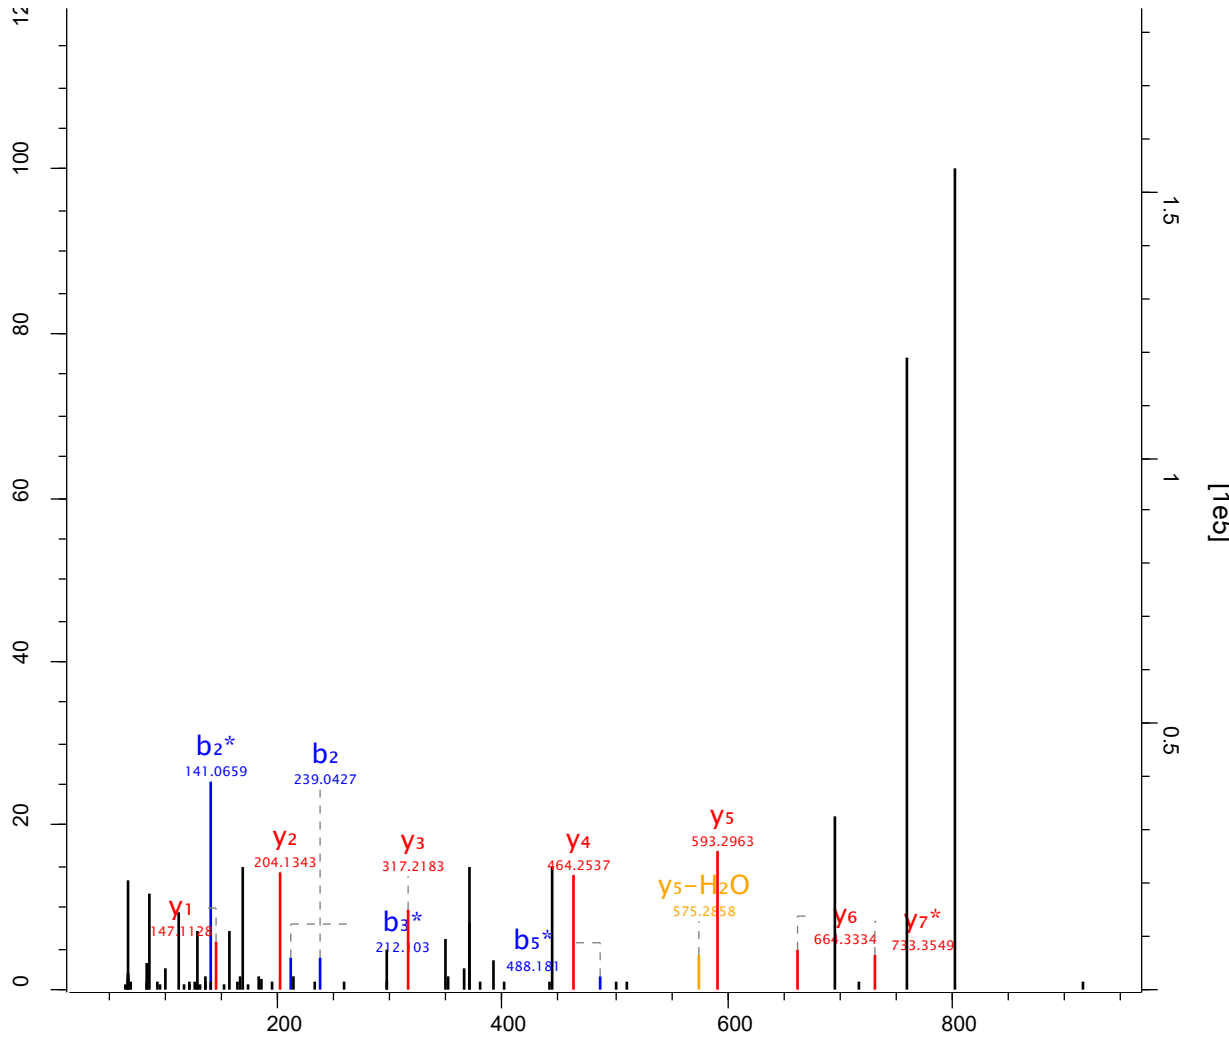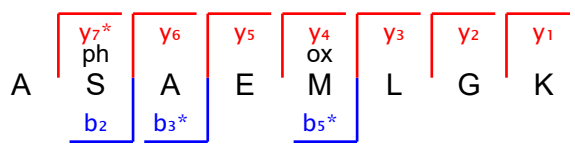

Raw file Scan Method Score m/z  
 sys\_15\_1 31129 FTMS; HCD 152.4 674.27

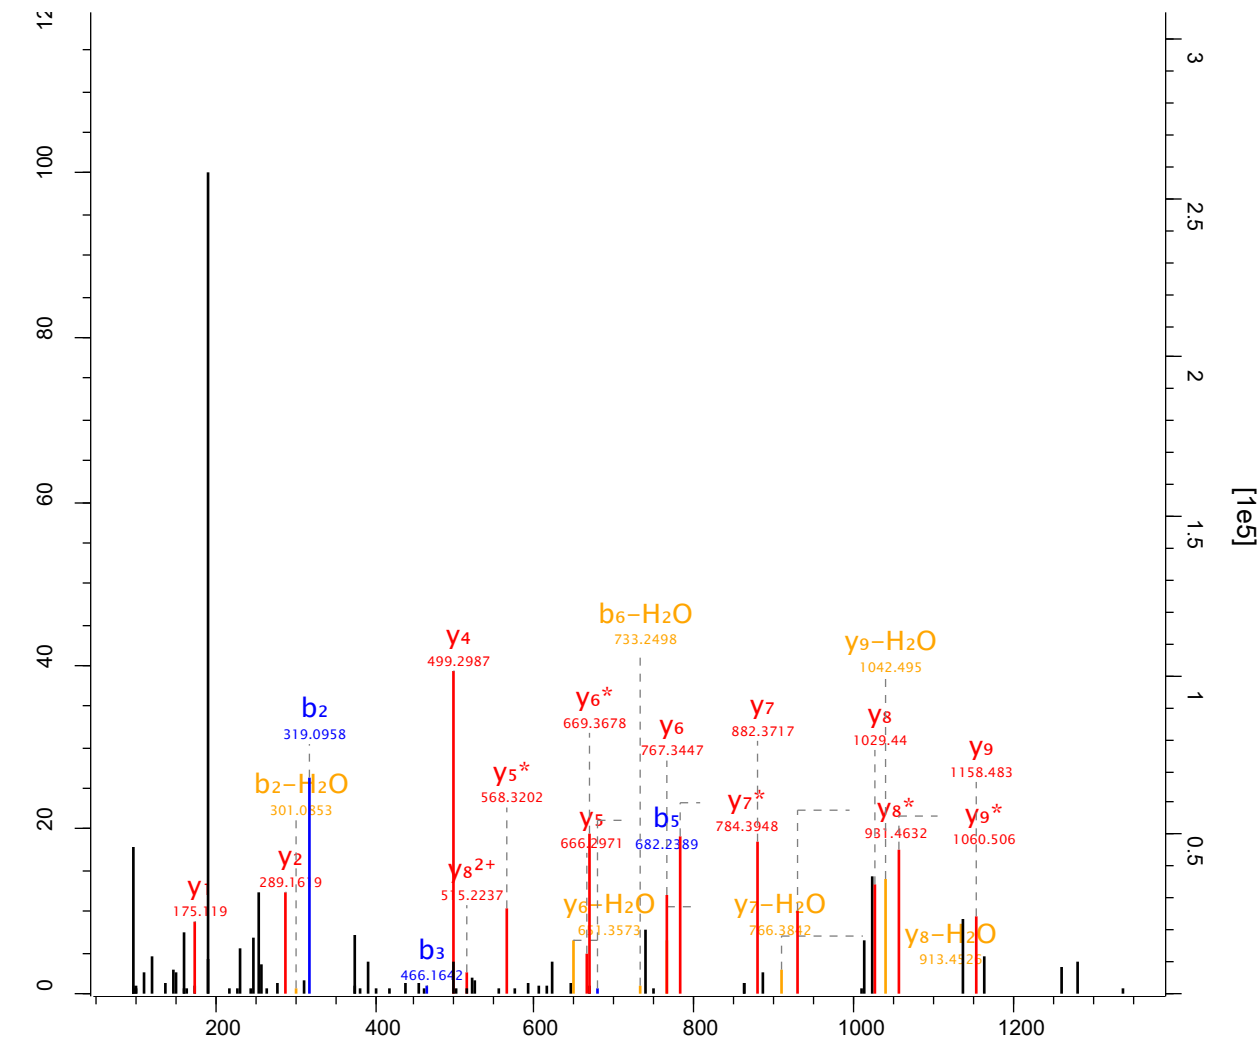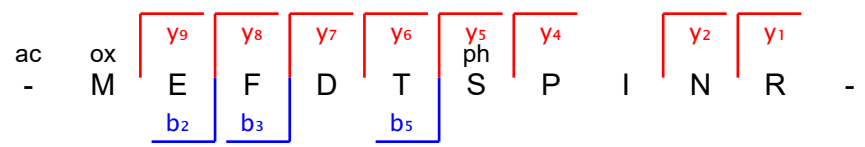

Raw file Scan Method Score m/z  
 sys\_15\_1 31200 FTMS; HCD 139.9 820.9

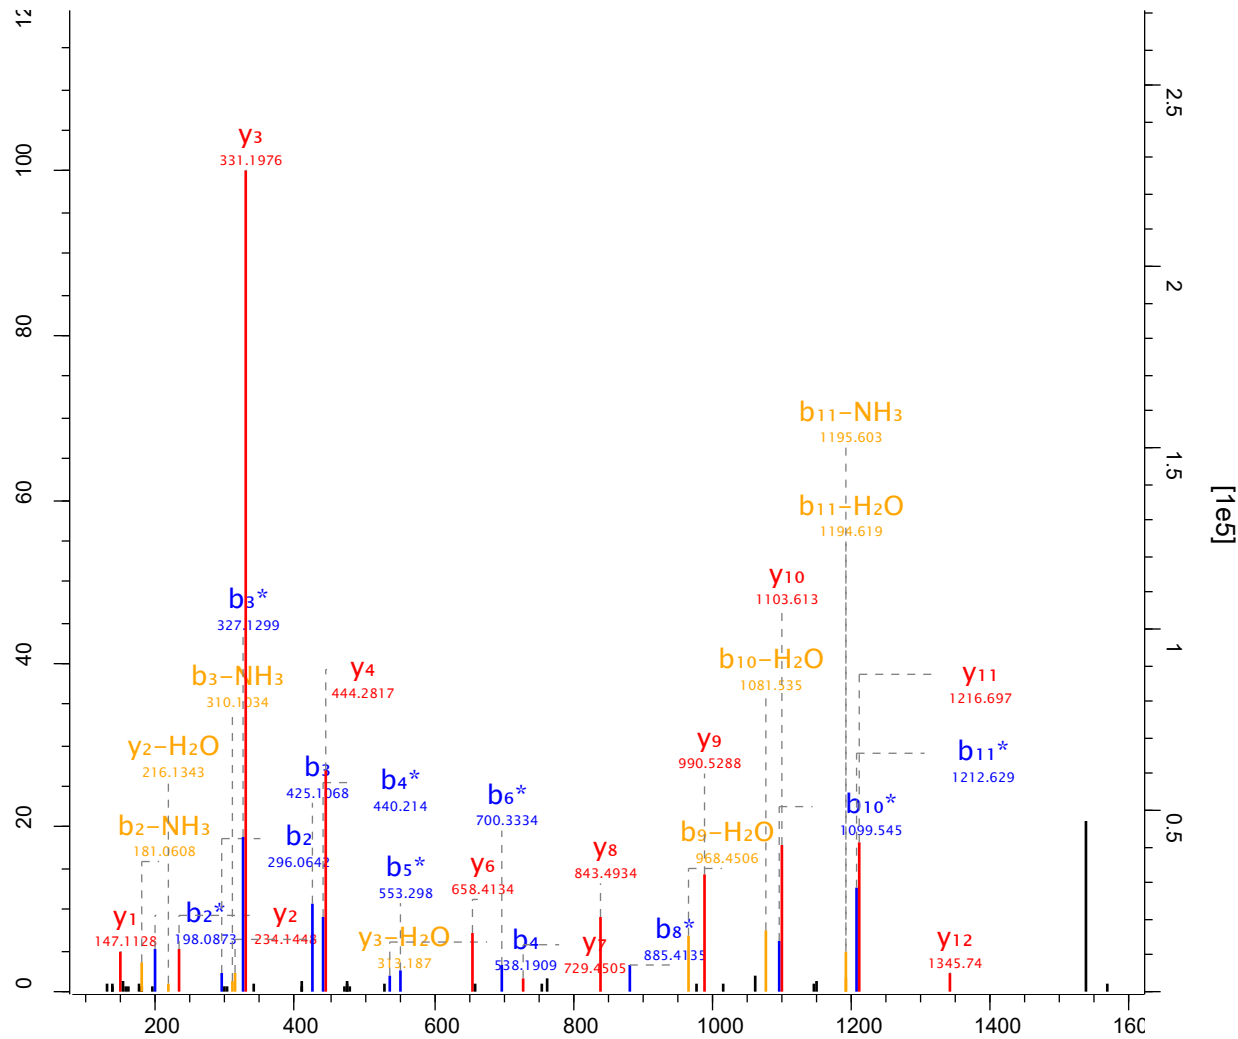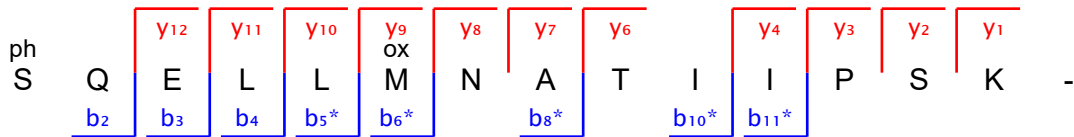

Raw file Scan Method Score m/z  
 sys\_15\_1 31232 FTMS; HCD 91.32 803.42

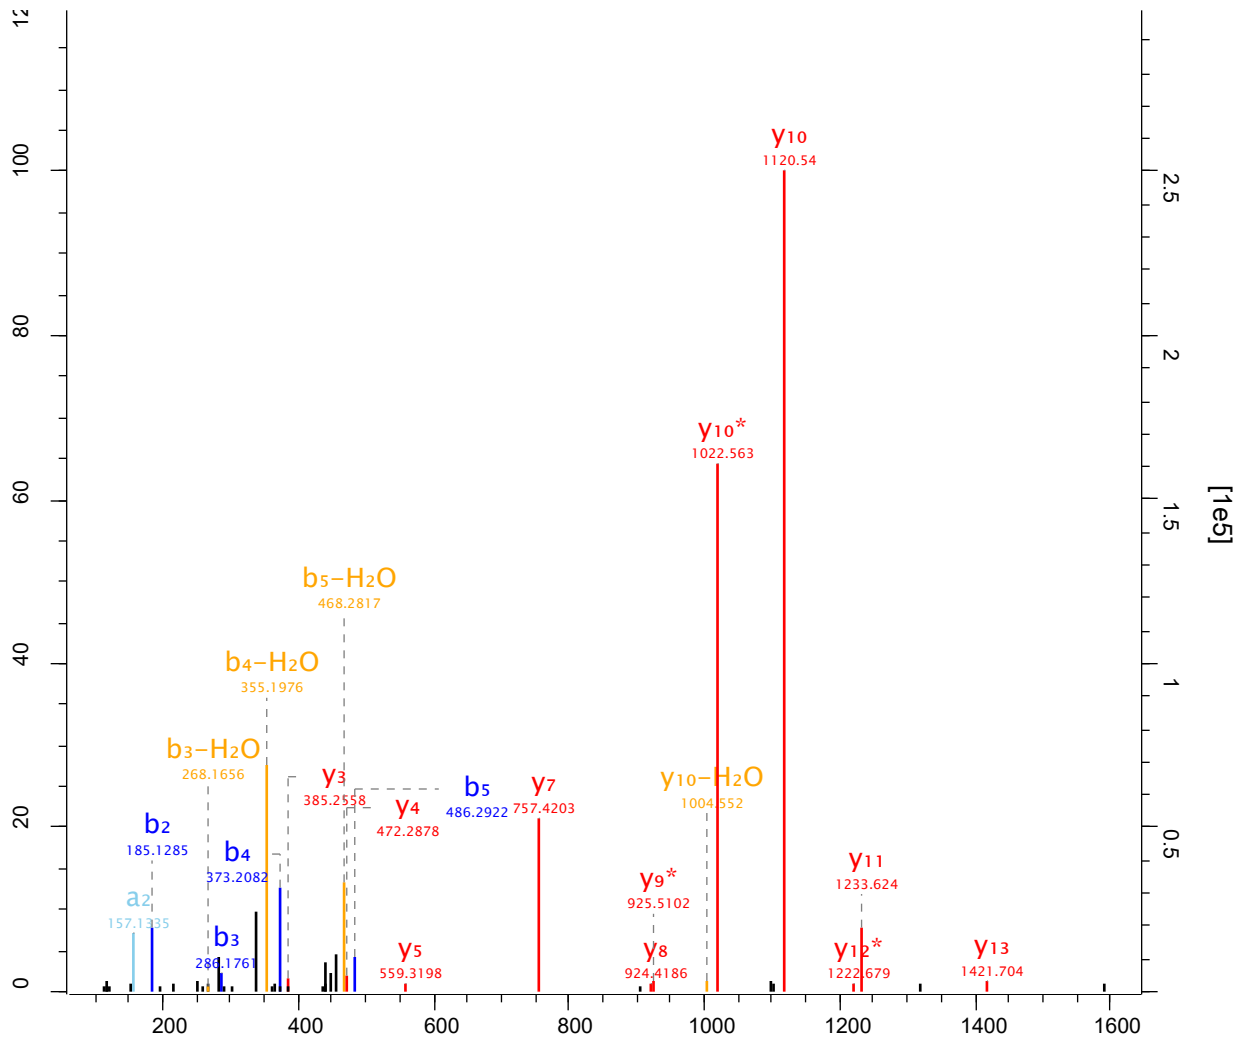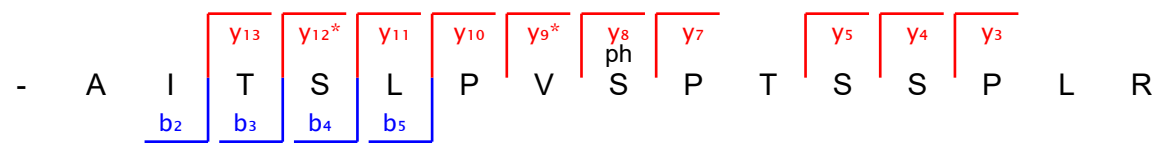

Raw file Scan Method Score m/z  
 sys\_15\_1 31373 FTMS; HCD 41.45 639.31

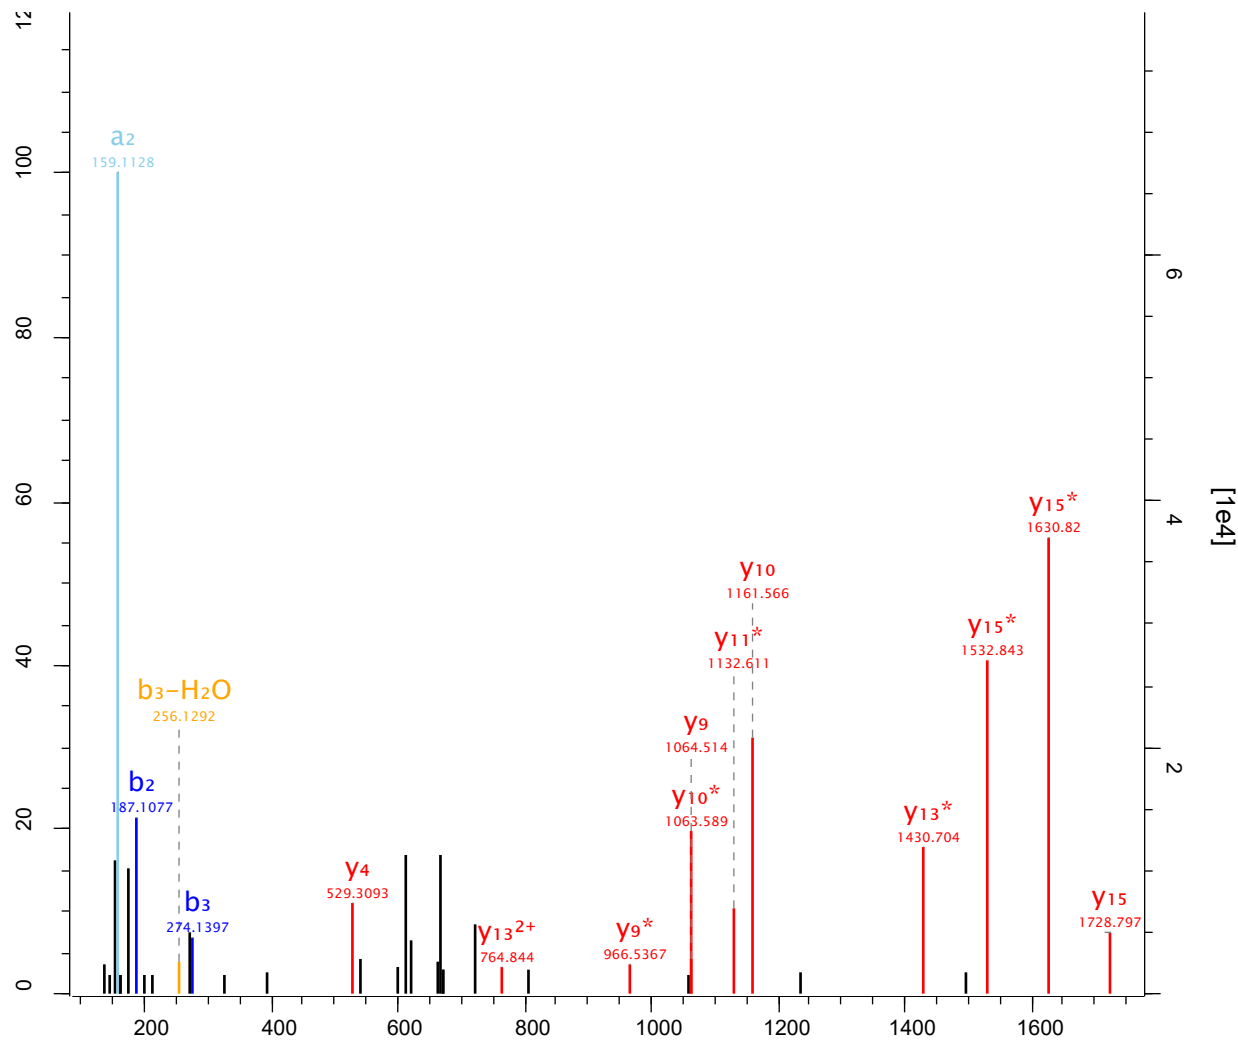

- S V S L S I S P P A S L S P E  
 R K -

Fragmentation mapping:  
 - b2: V-S  
 - b3: S-L  
 - y15: S-P  
 - y13\*: S-L  
 - y11\*: S-P  
 - y10: P-P  
 - y9: P-P  
 - y4: S-P

Raw file Scan Method Score m/z  
 sys\_15\_1 31482 FTMS; HCD 227.95 920.88

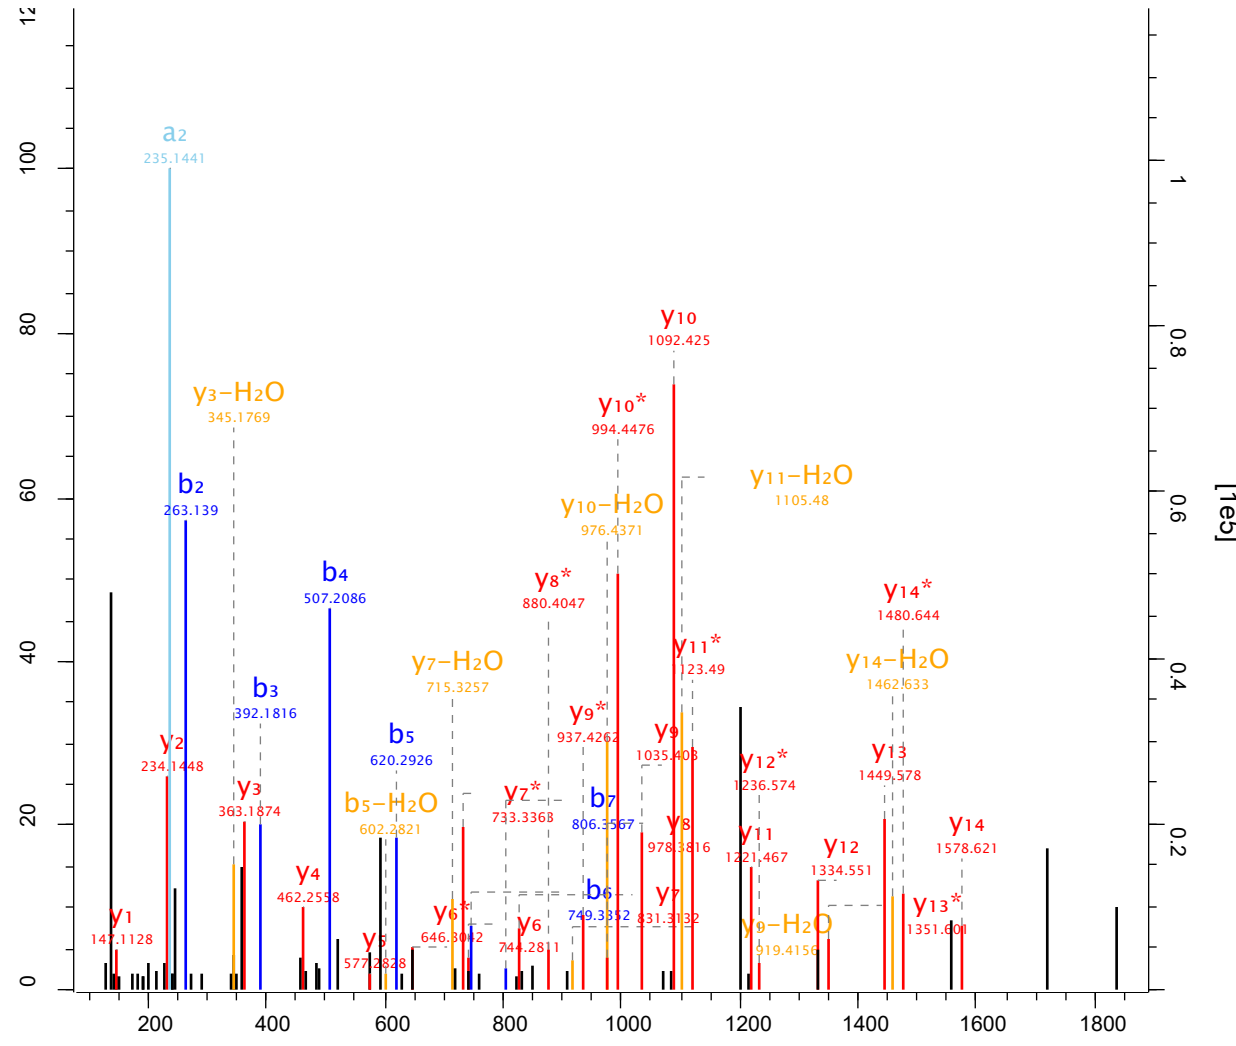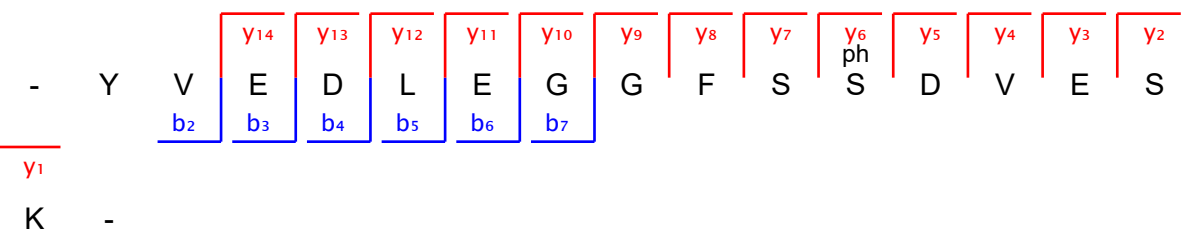

Raw file Scan Method Score m/z  
 sys\_15\_1 31524 FTMS; HCD 58.95 751.01

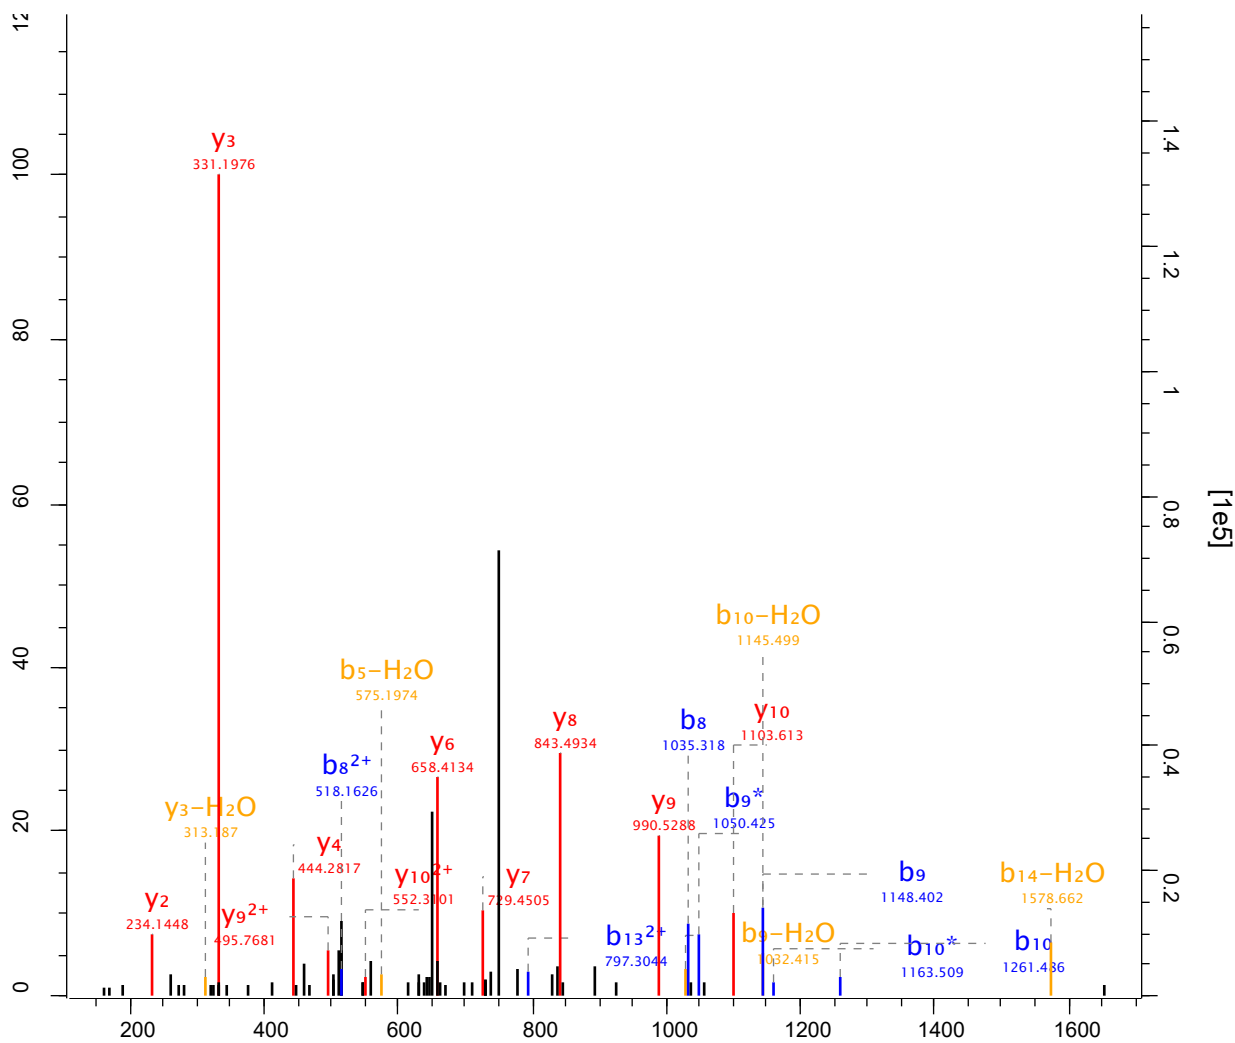

- G T S E R S Q E L L M N A T I  
 I P S K -  
 y<sub>4</sub> y<sub>3</sub> y<sub>2</sub>  
 b<sub>8</sub> b<sub>9</sub> b<sub>10</sub> y<sub>10</sub> y<sub>9</sub>OX y<sub>8</sub> y<sub>7</sub> y<sub>6</sub>  
 b<sub>13</sub>2<sup>+</sup> b<sub>10</sub>\* b<sub>10</sub>

Raw file Scan Method Score m/z  
 sys\_15\_1 31552 FTMS; HCD 41.65 668.97

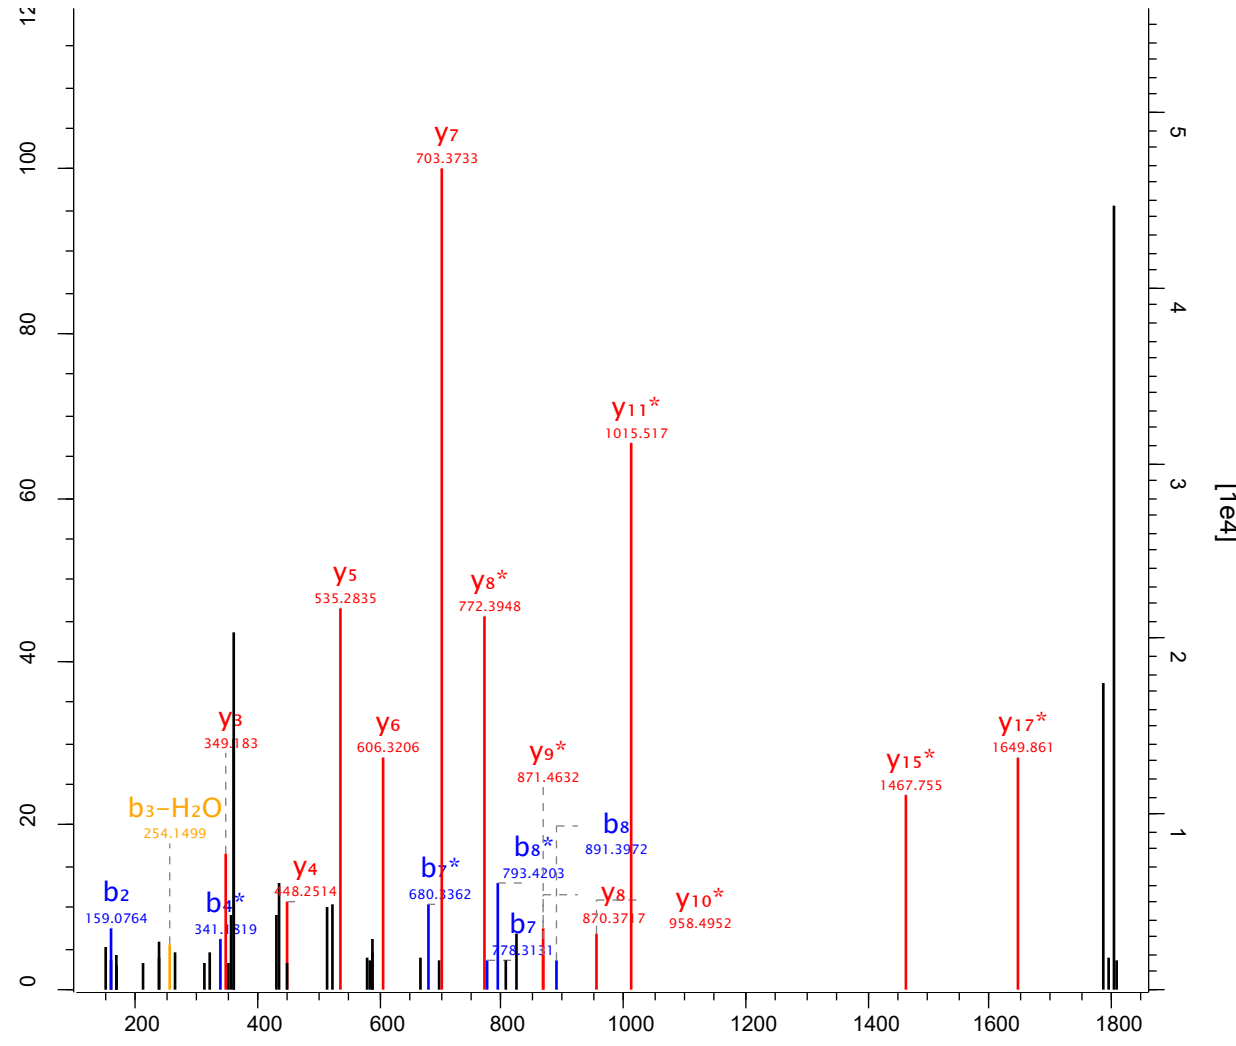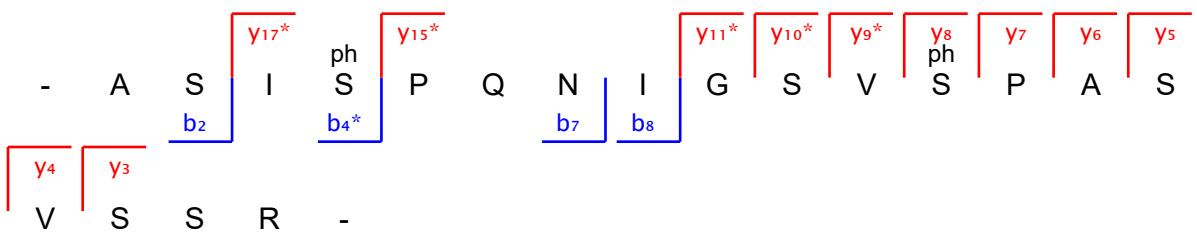



Raw file Scan Method Score m/z  
 sys\_15\_1 31651 FTMS; HCD 100.97 904.39

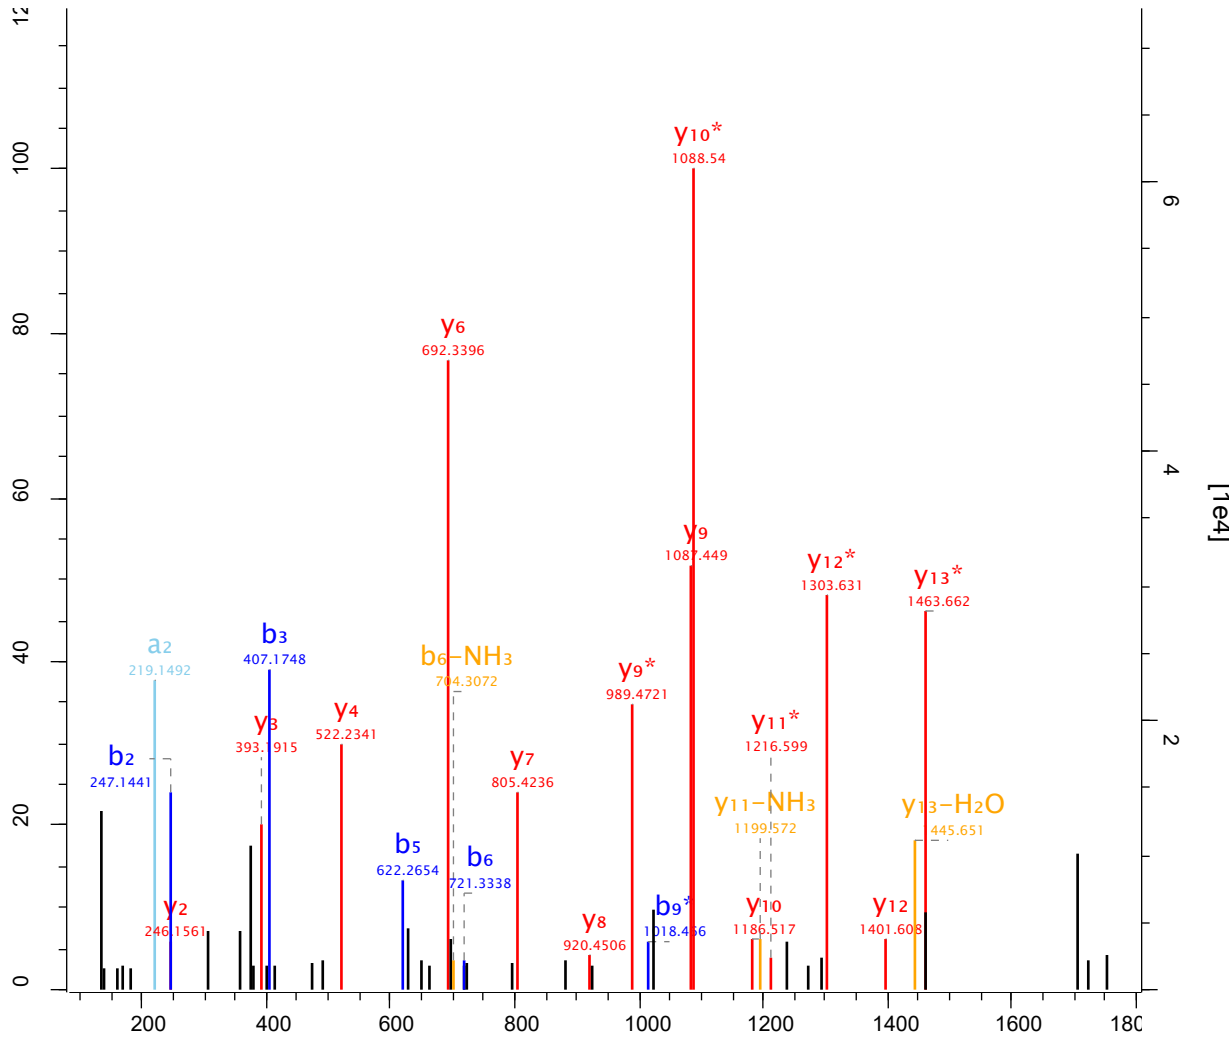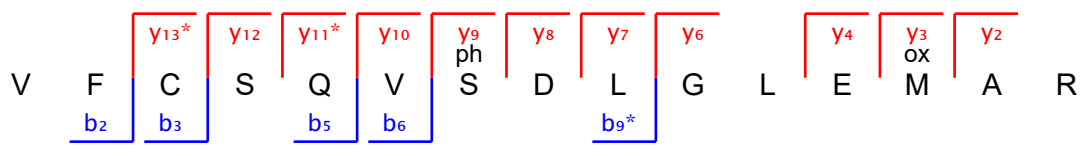

Raw file Scan Method Score m/z  
 sys\_15\_1 3181 FTMS; HCD 68.97 453.54

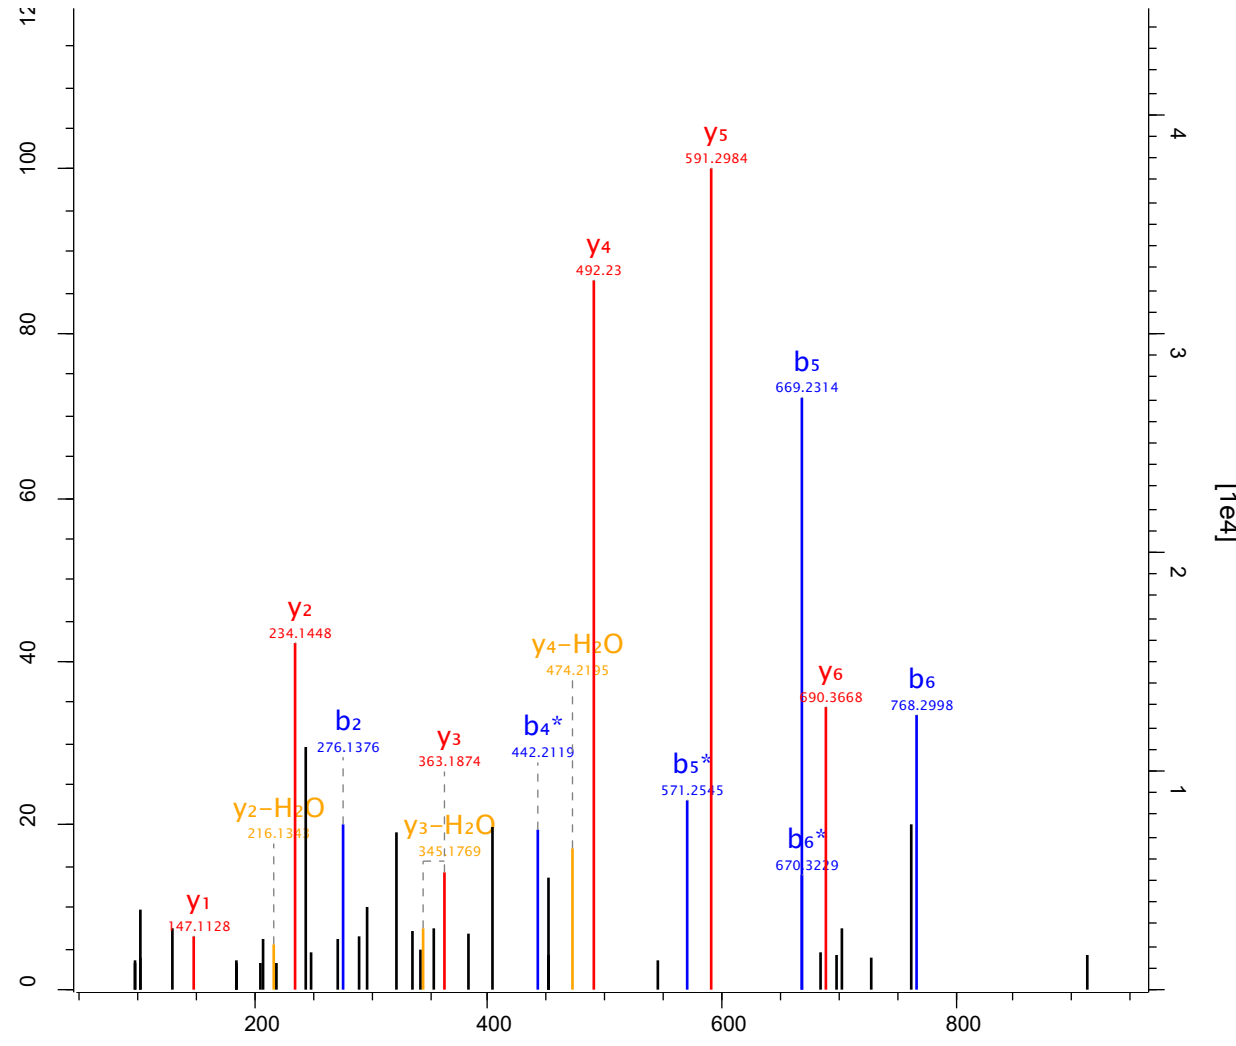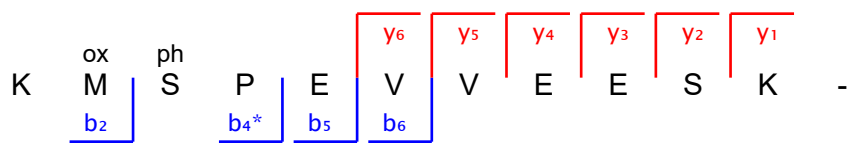

Raw file Scan Method Score m/z  
 sys\_15\_1 31811 FTMS; HCD 171.47 1005.38

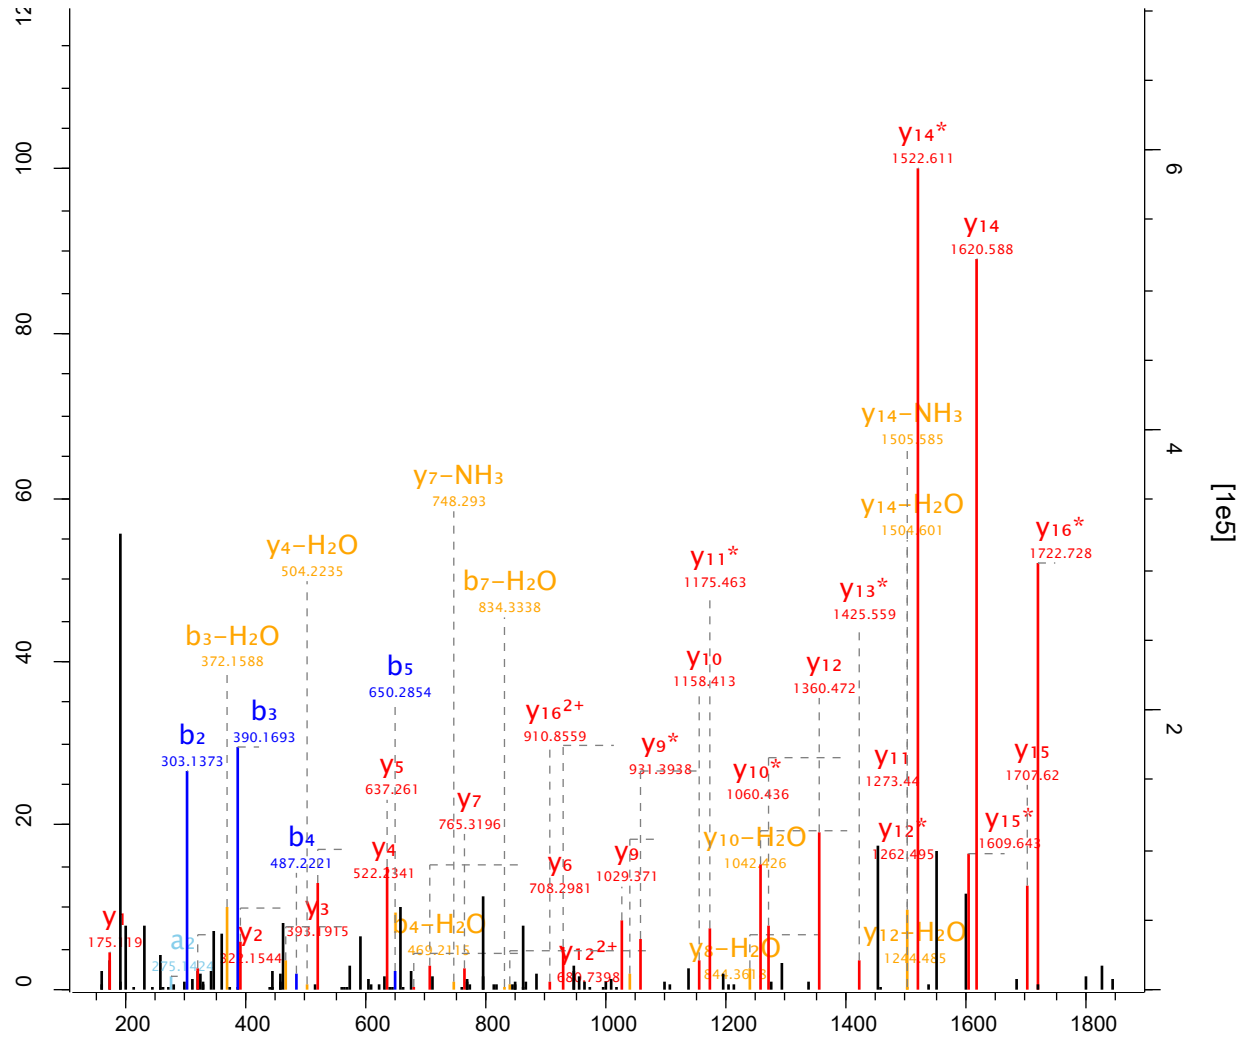

ac ox y16\* y15 y14 y13\* y12 y11 y10 y9 ph y7 y6 y5 y4 y3  
 - M L S P Y S D E S P G A D E A  
 b2 b3 b4 b5  
 y2 ox y1  
 M R -

Raw file Scan Method Score m/z  
 sys\_15\_1 32081 FTMS; HCD 112.26 941.77

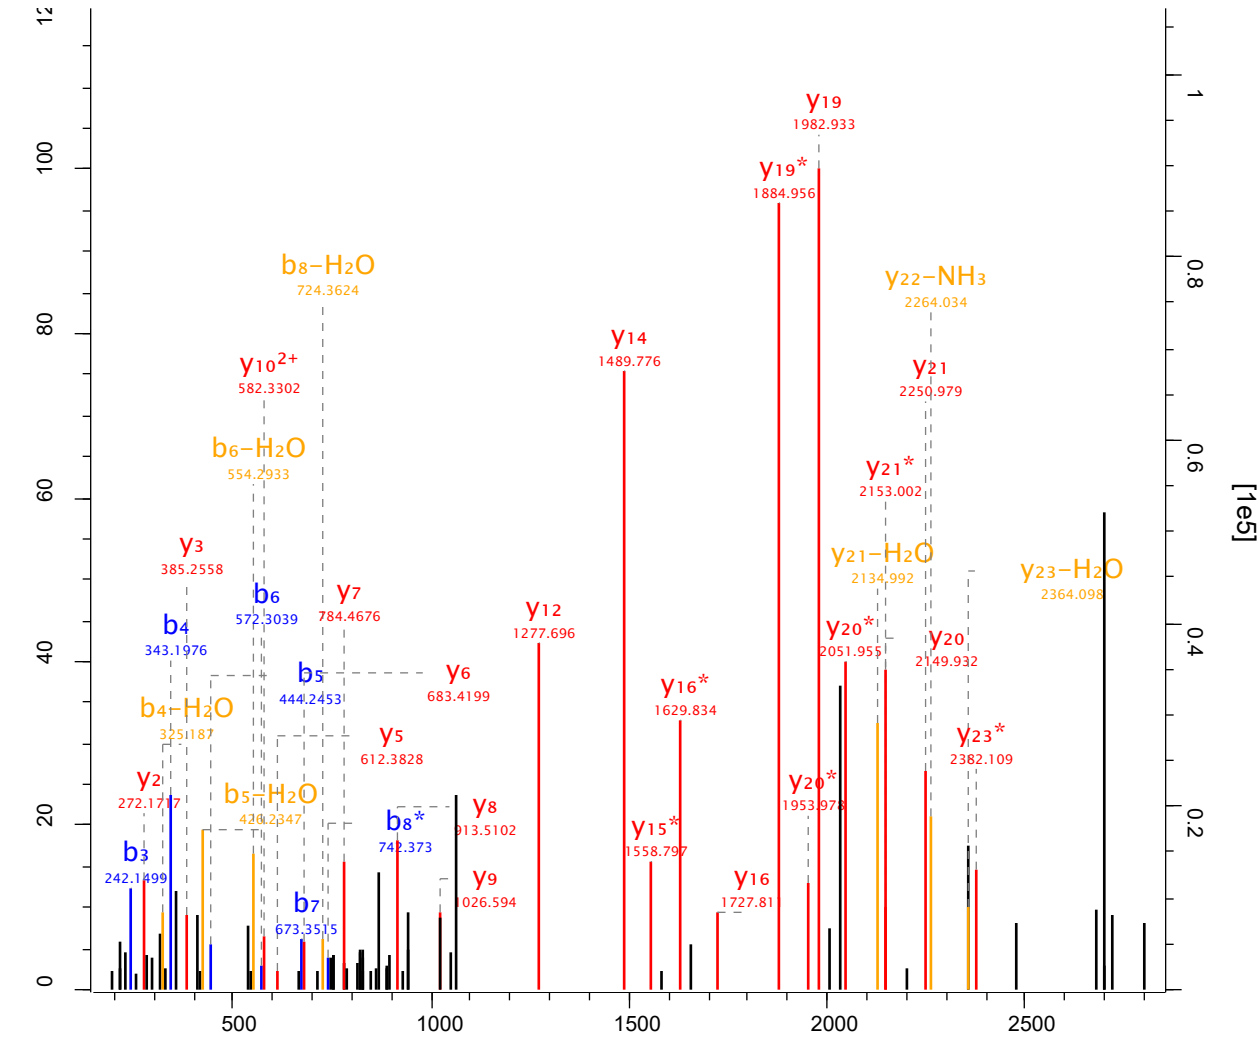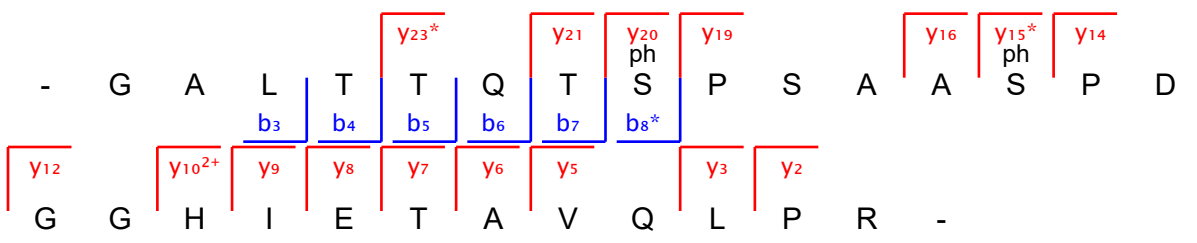

Raw file Scan Method Score m/z  
 sys\_15\_1 32091 FTMS; HCD 49.99 916.41

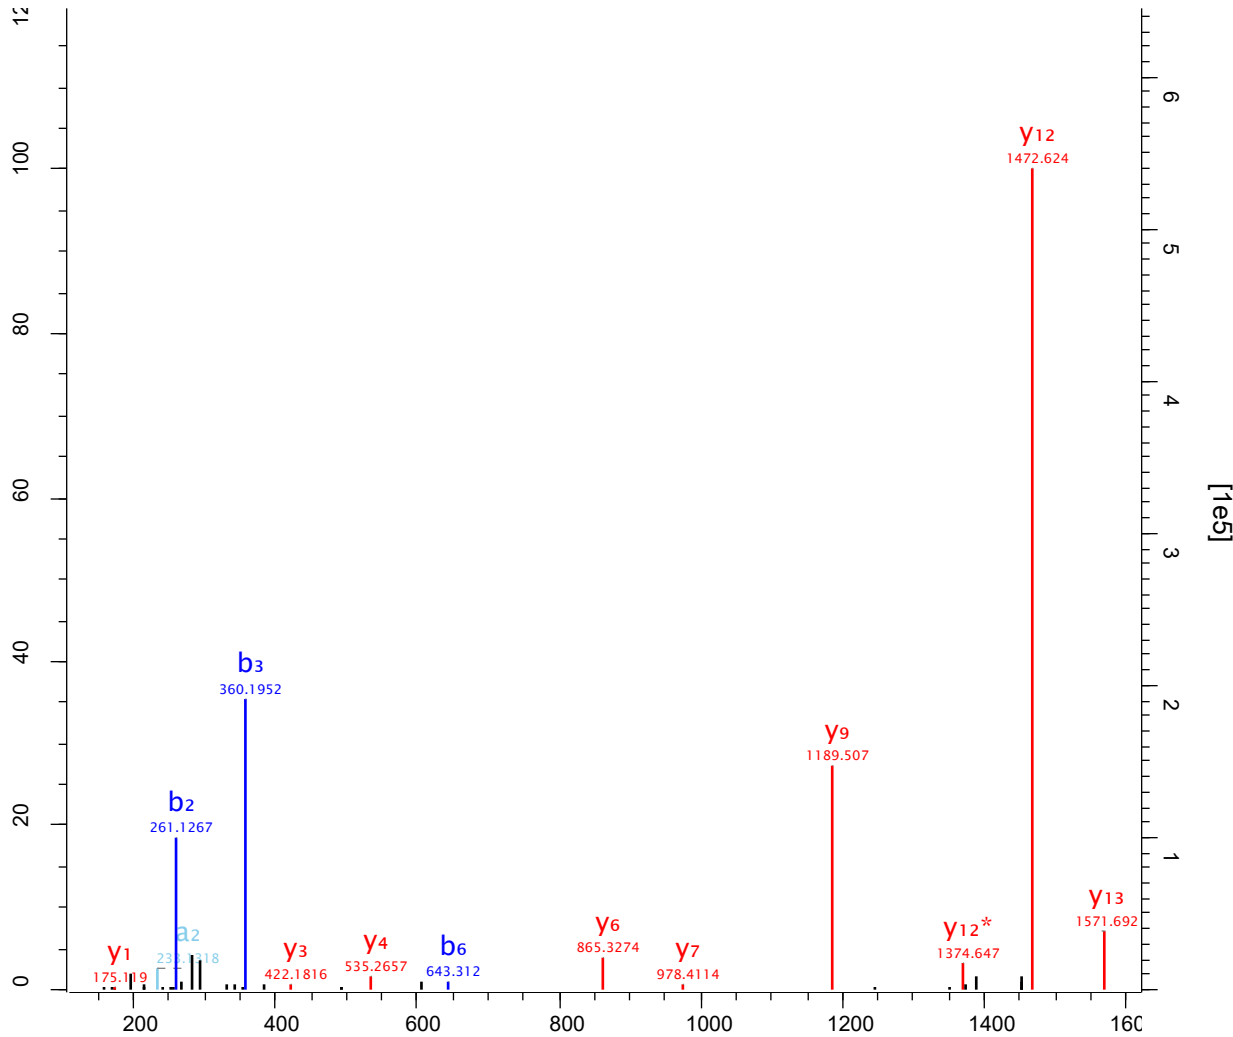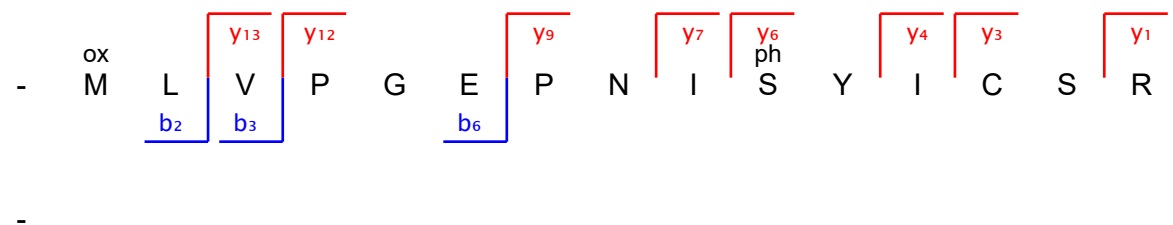

Raw file Scan Method Score m/z  
 sys\_15\_1 32151 FTMS; HCD 109 632.78

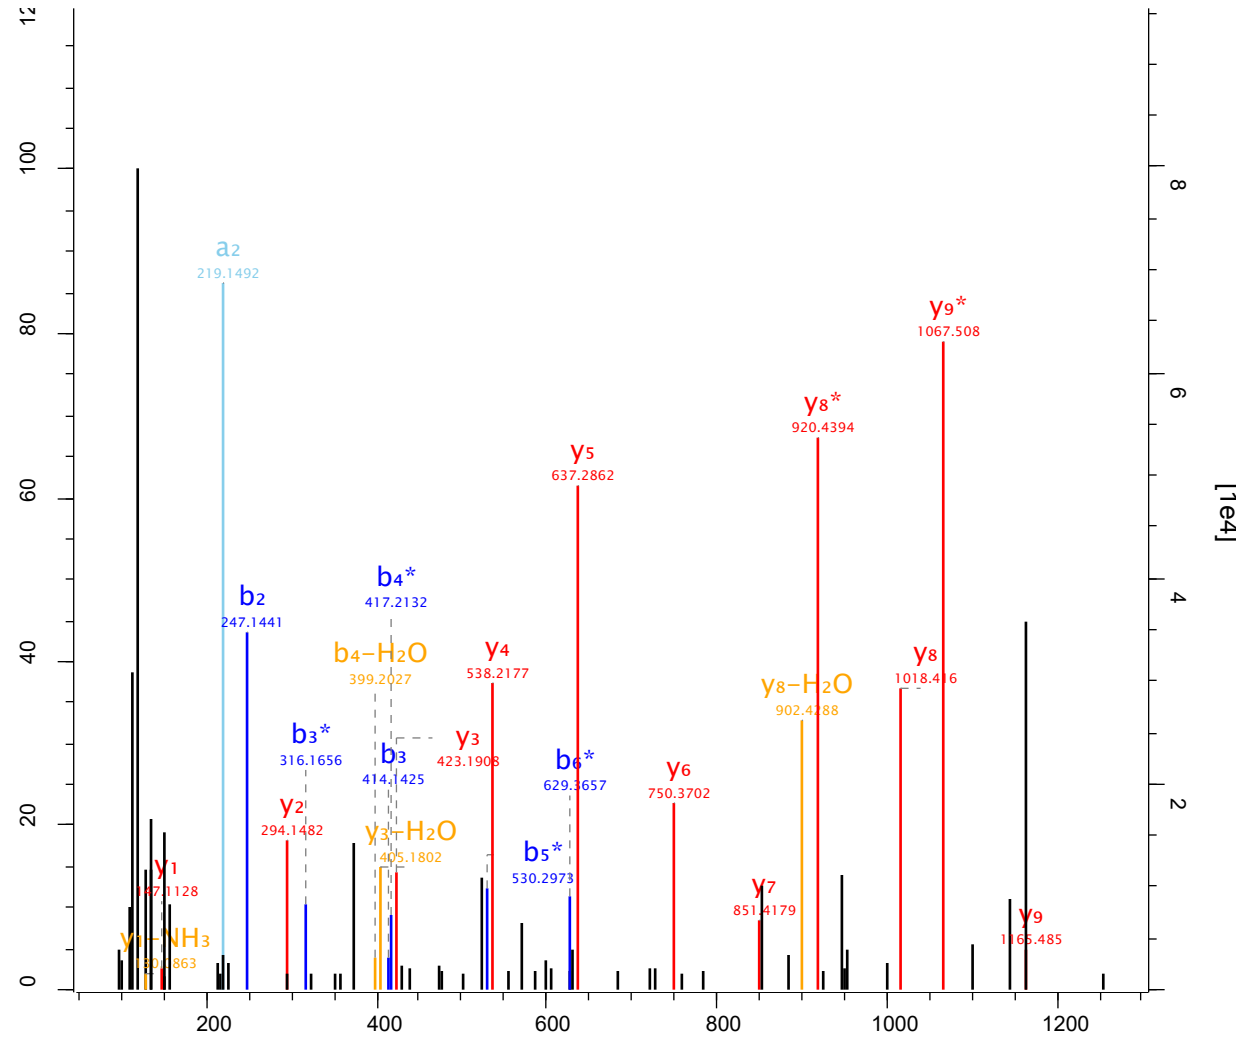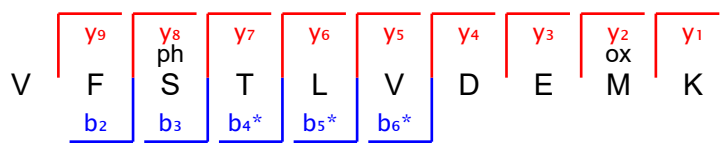

Raw file Scan Method Score m/z  
 sys\_15\_1 32255 FTMS; HCD 41.91 688.65

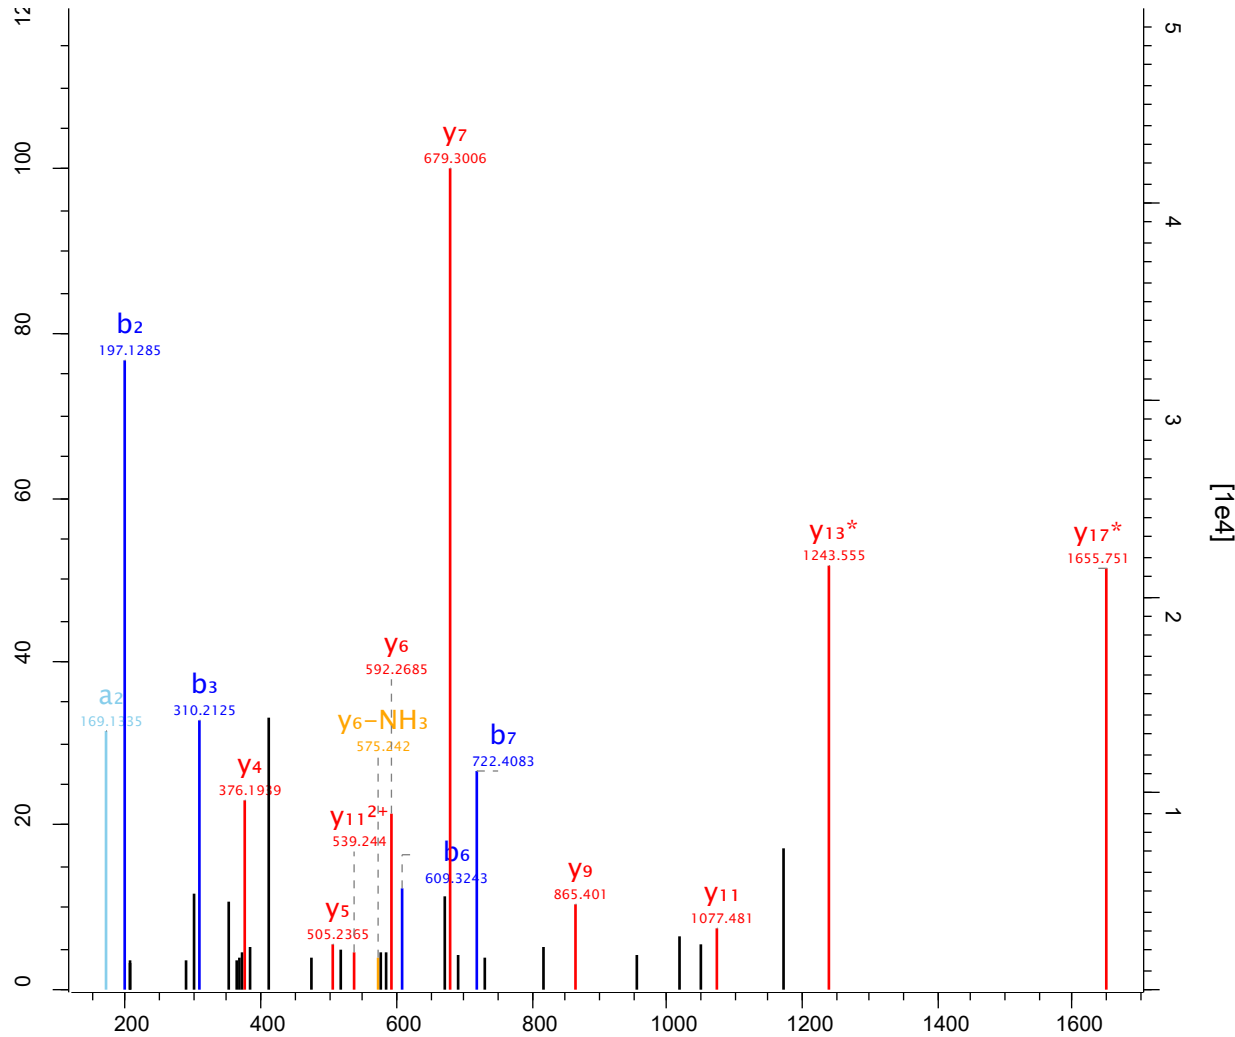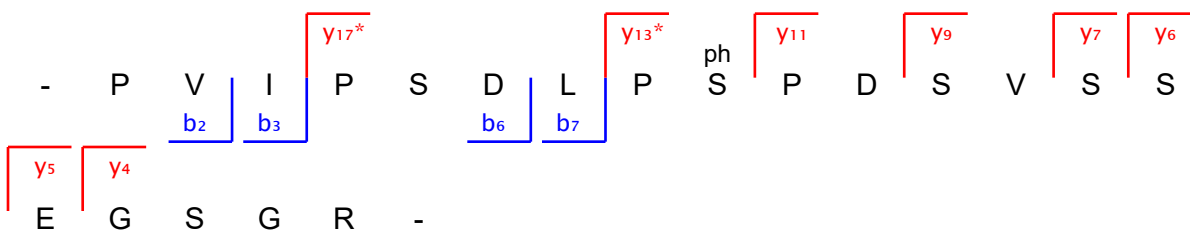

Raw file Scan Method Score m/z  
 sys\_15\_1 32257 FTMS; HCD 166.6 853.43

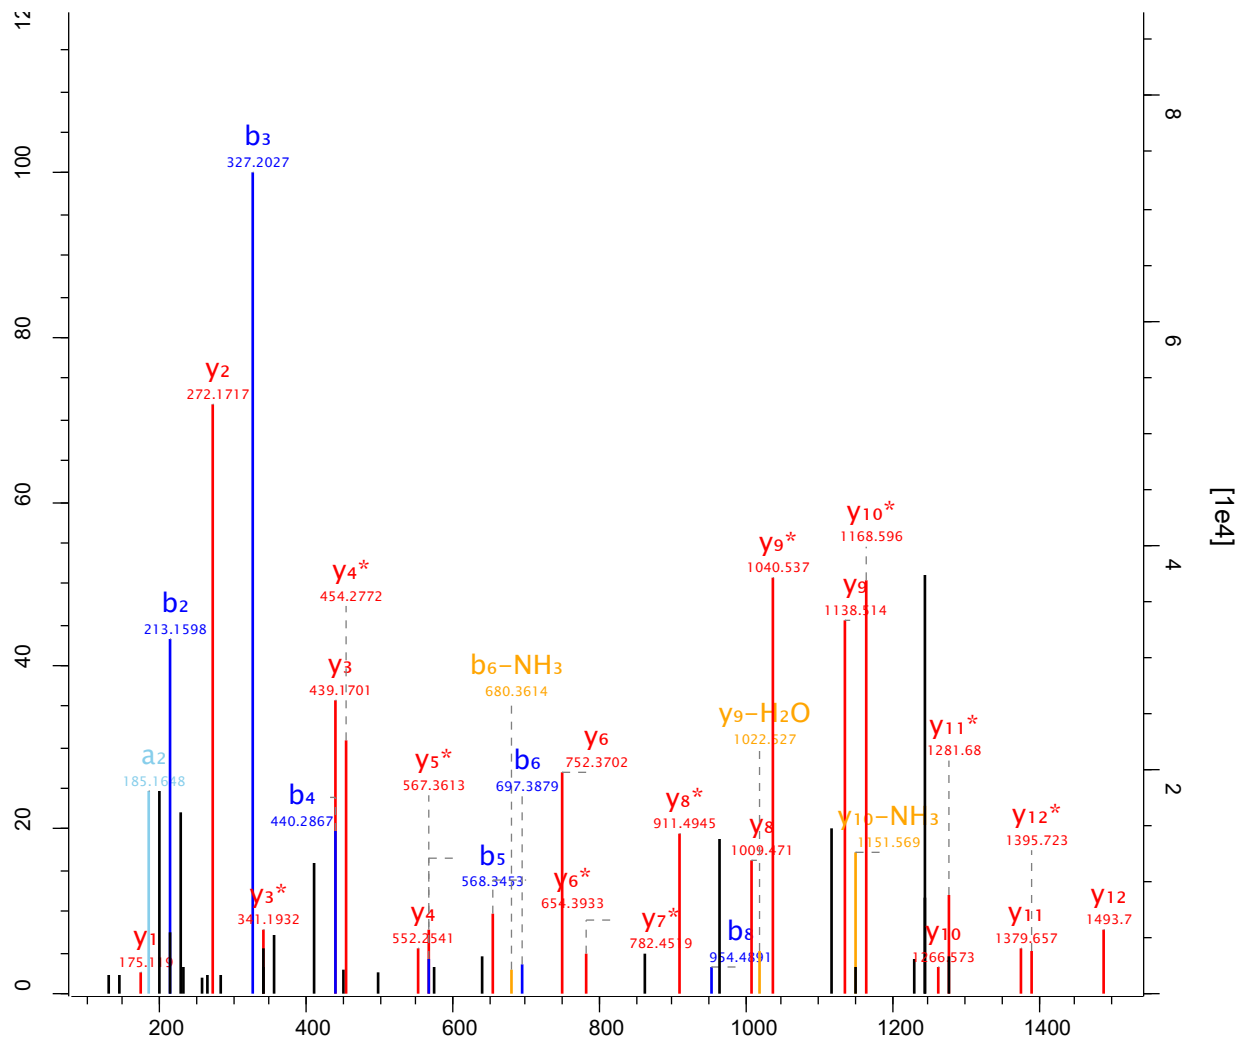

- V L N I Q E E Q S I L S P R -

b<sub>2</sub>
b<sub>3</sub>
b<sub>4</sub>
b<sub>5</sub>
b<sub>6</sub>
b<sub>8</sub>

y<sub>12</sub>
y<sub>11</sub>
y<sub>10</sub>
y<sub>9</sub>
y<sub>8</sub>
y<sub>7</sub>\*
y<sub>6</sub>
y<sub>5</sub>\*
y<sub>4</sub>
y<sub>3</sub>ph
y<sub>2</sub>
y<sub>1</sub>



Raw file Scan Method Score m/z  
 sys\_15\_1 32262 FTMS; HCD 45.58 741.65

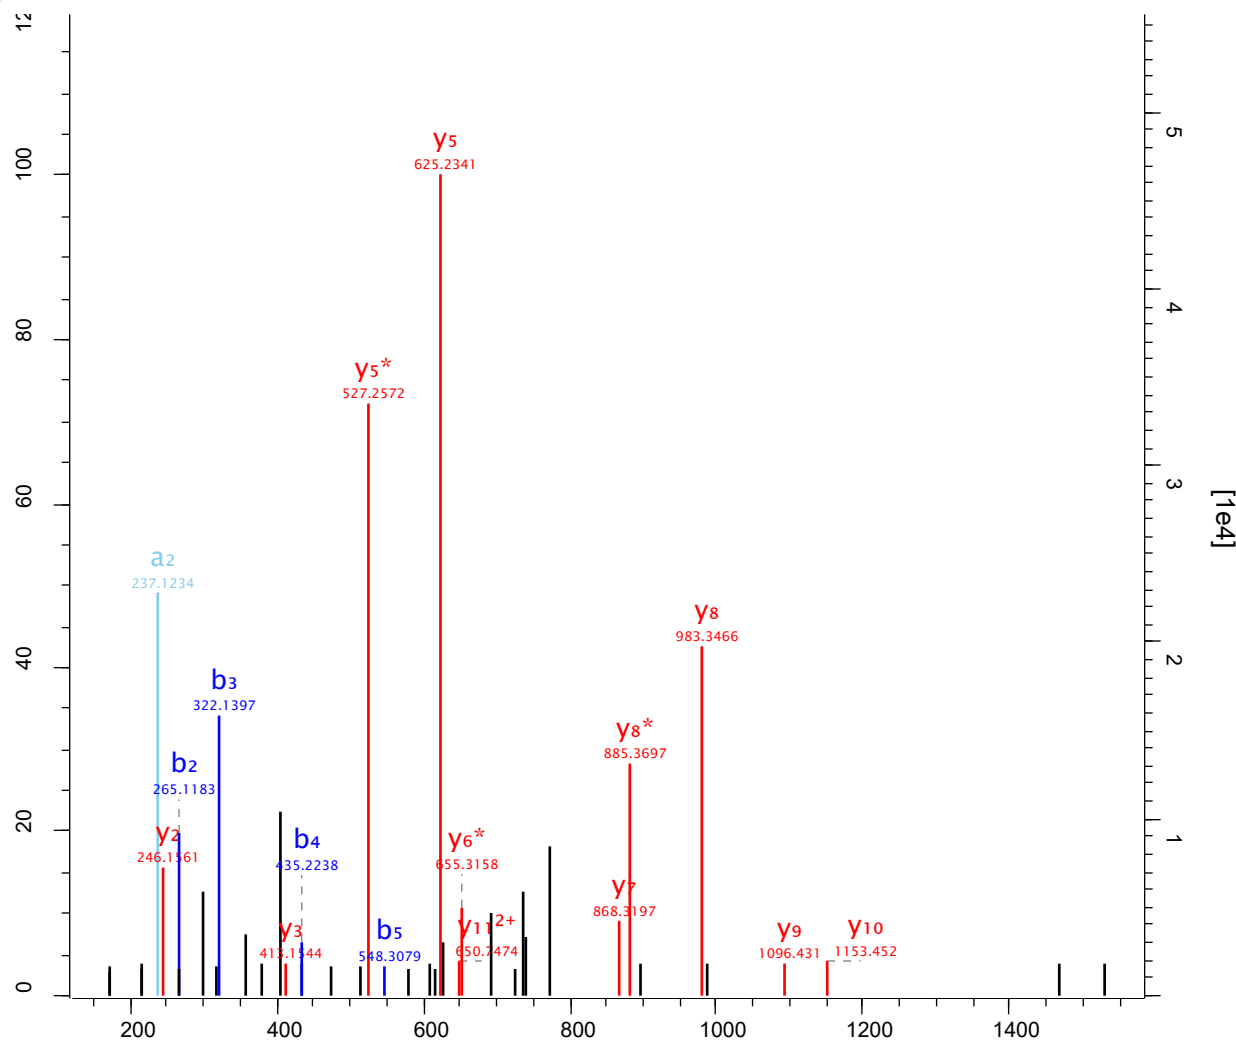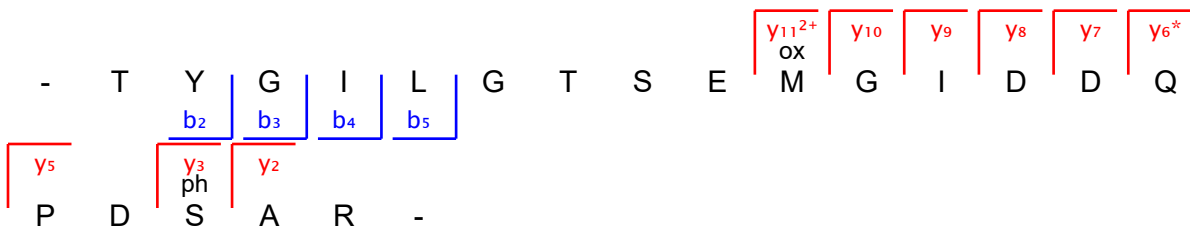

Raw file Scan Method Score m/z  
 sys\_15\_1 32282 FTMS; HCD 110.33 1108.45

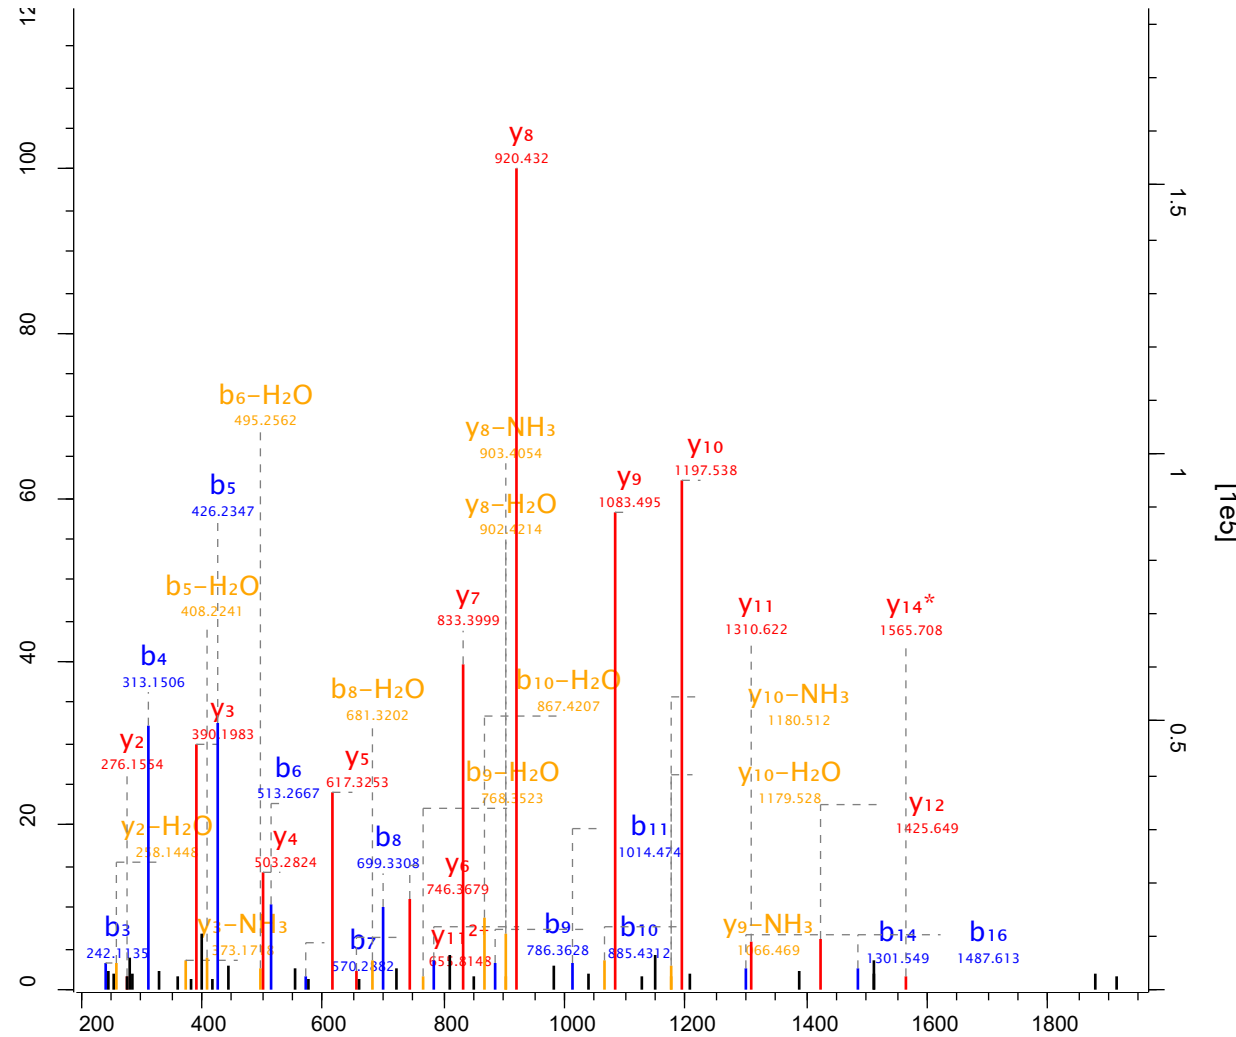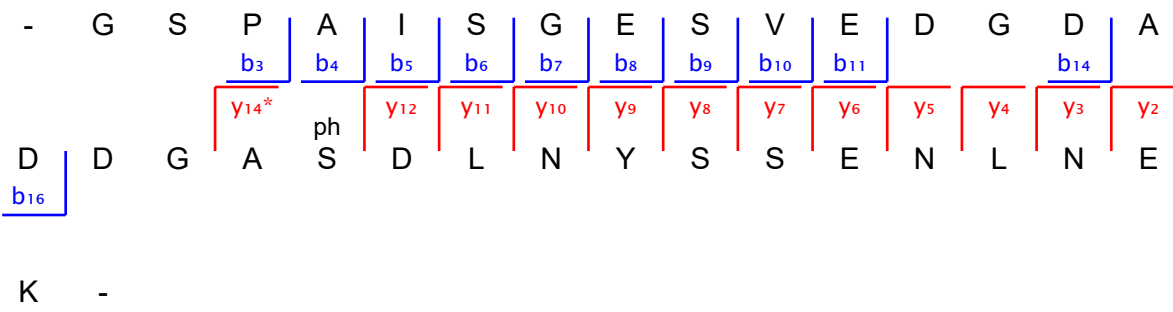

Raw file Scan Method Score m/z  
 sys\_15\_1 32313 FTMS; HCD 56.69 957.76

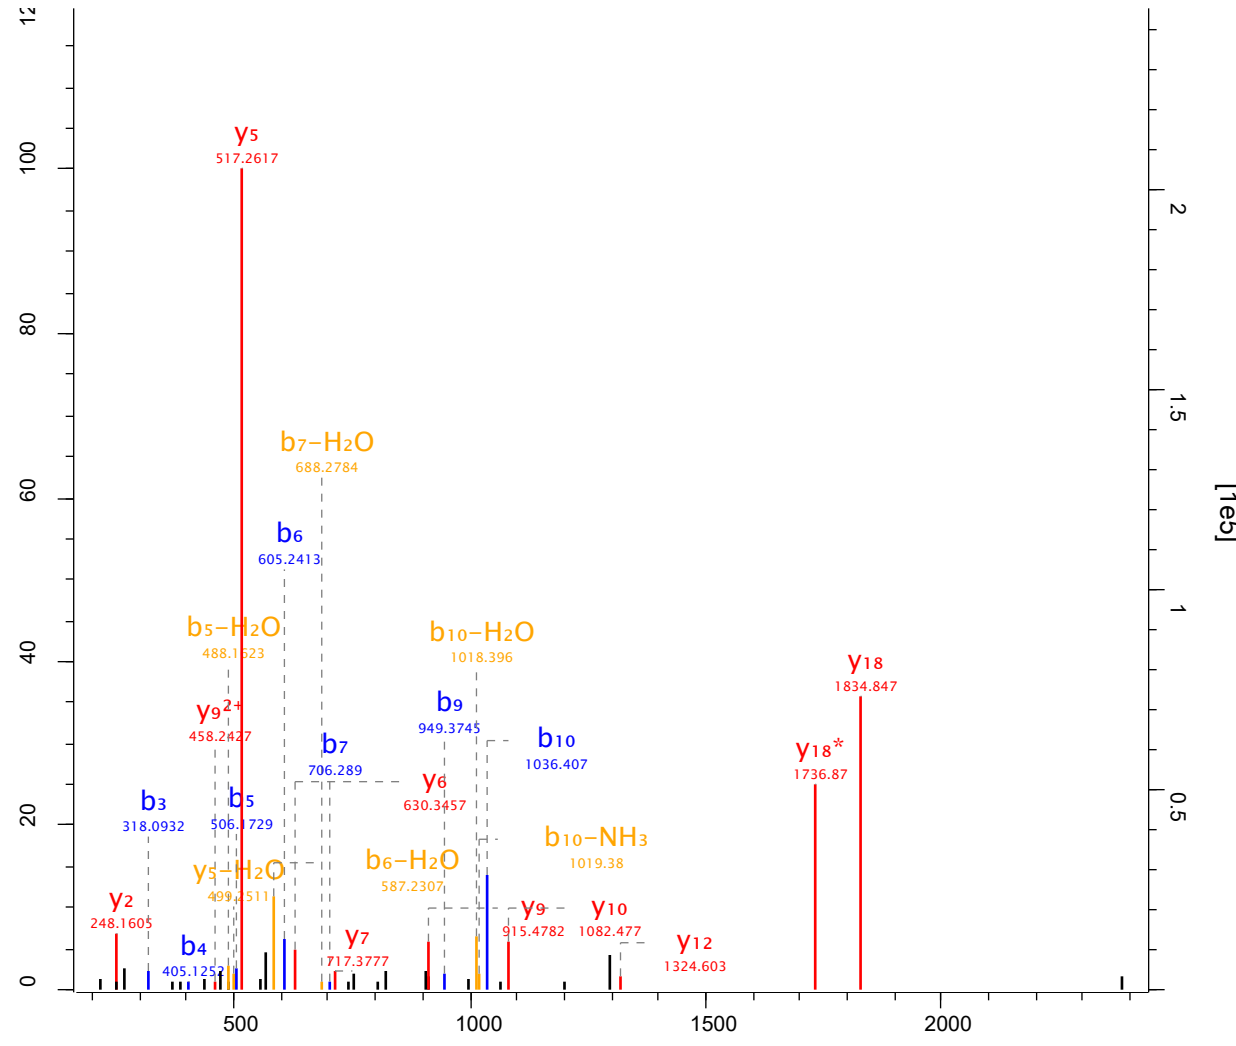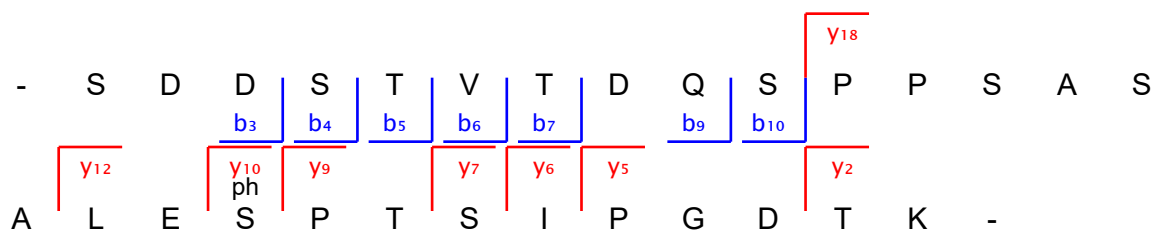

Raw file Scan Method Score m/z  
 sys\_15\_1 32356 FTMS; HCD 101.41 755.33

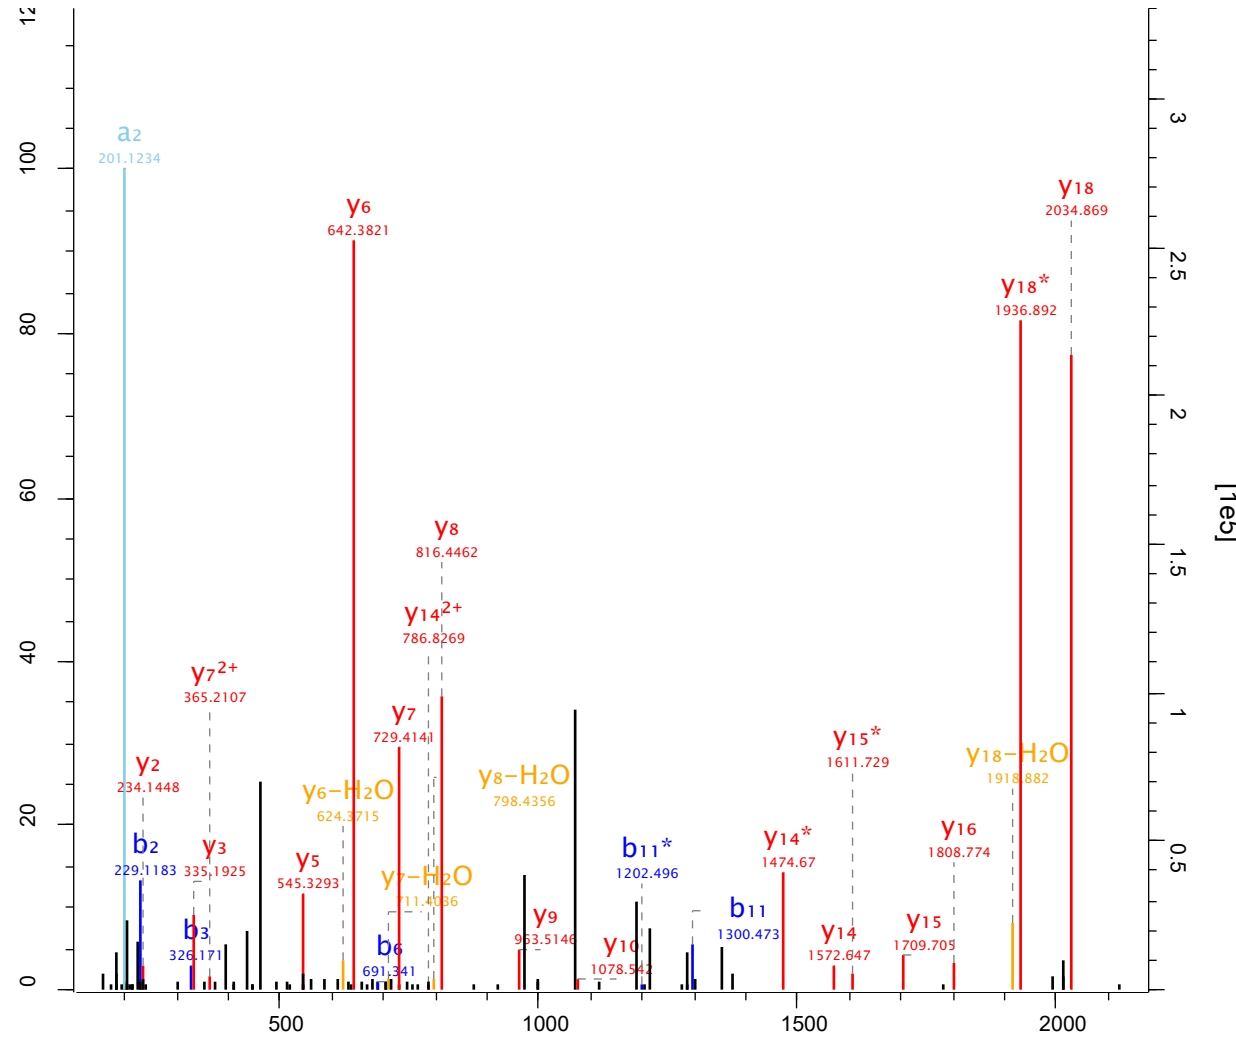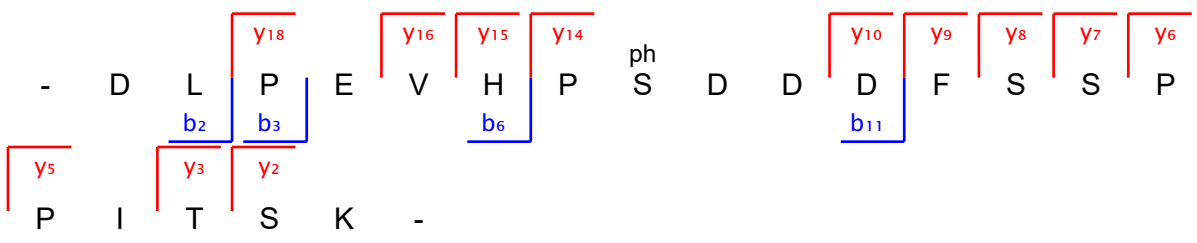

Raw file Scan Method Score m/z  
 sys\_15\_1 32391 FTMS; HCD 71.38 769.84

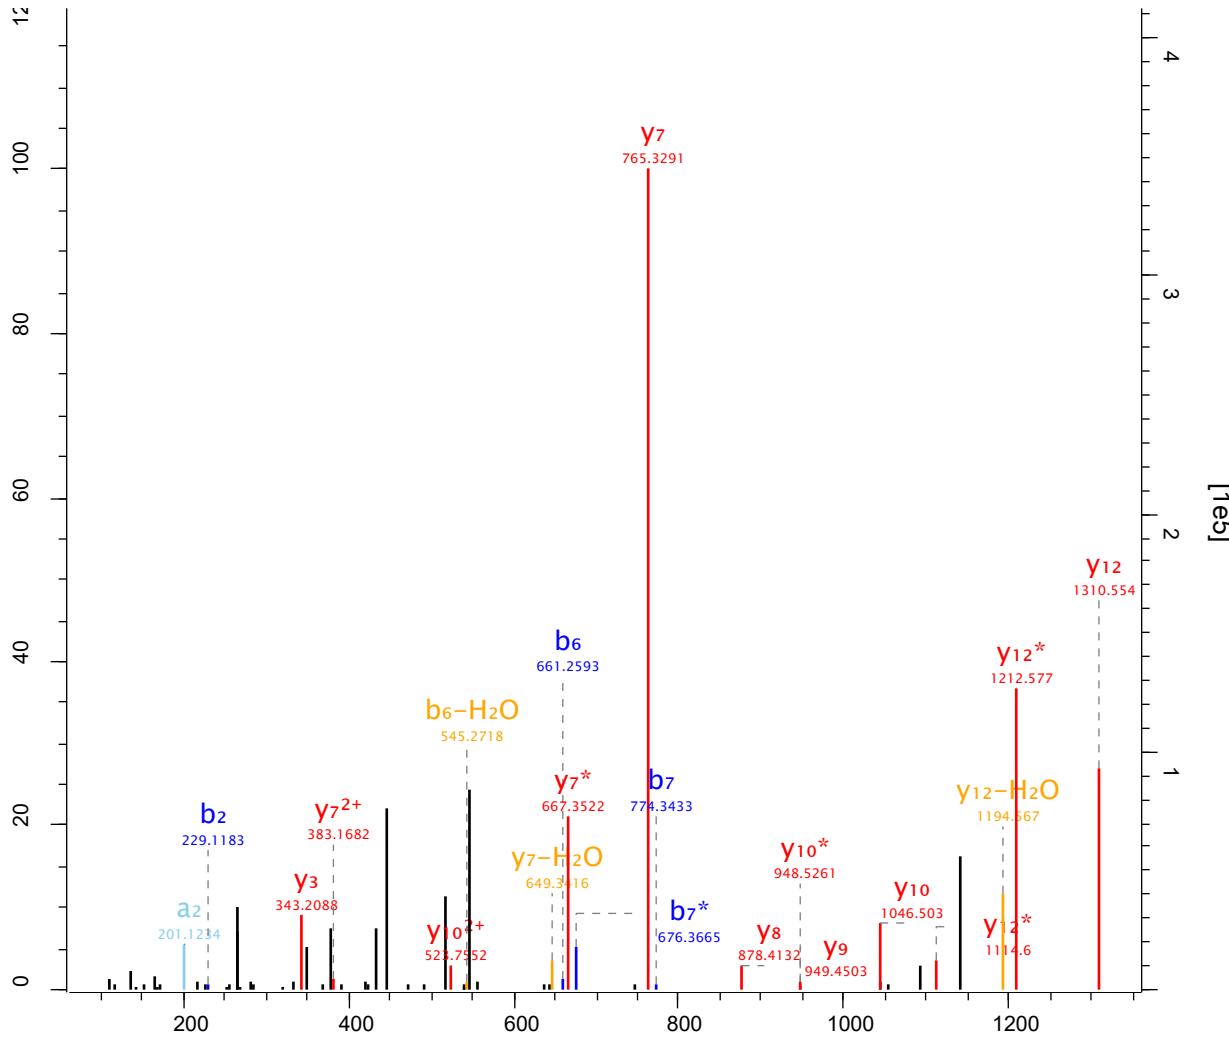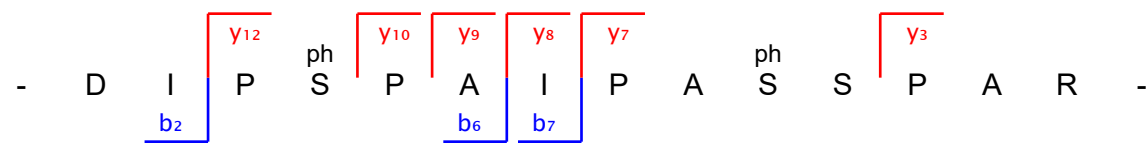

Raw file Scan Method Score m/z  
 sys\_15\_1 32427 FTMS; HCD 159.81 699.31

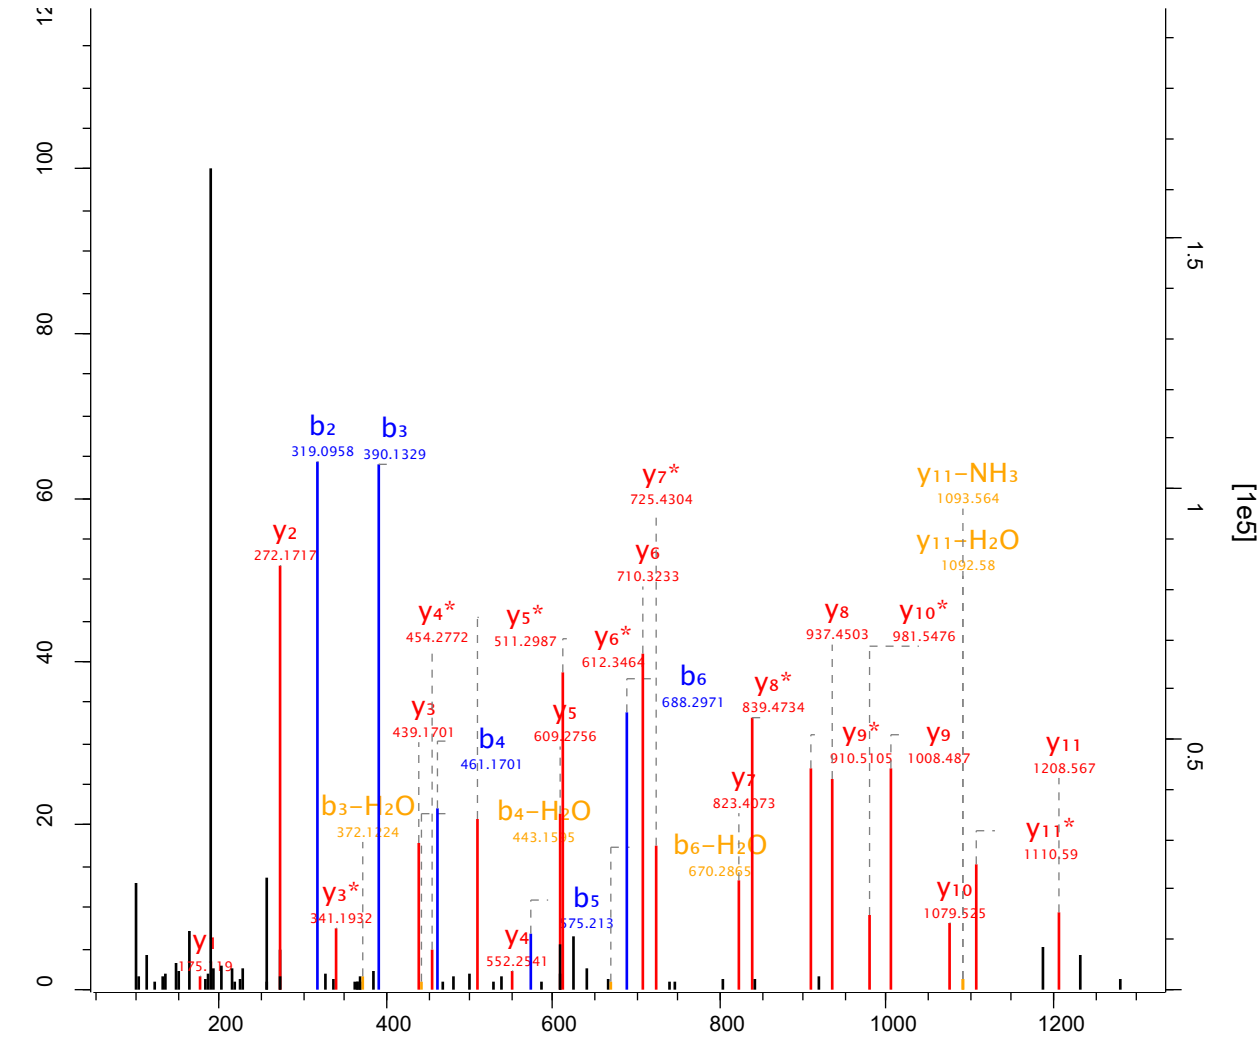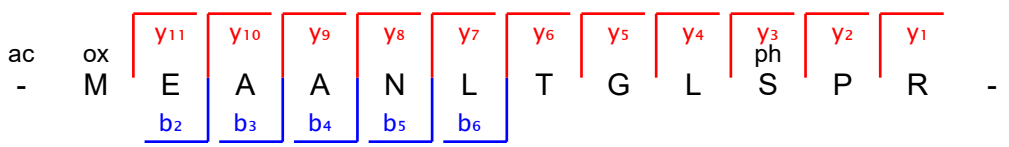

Raw file sys\_15\_1 Scan 32593 Method FTMS; HCD Score 142.94 m/z 869.4

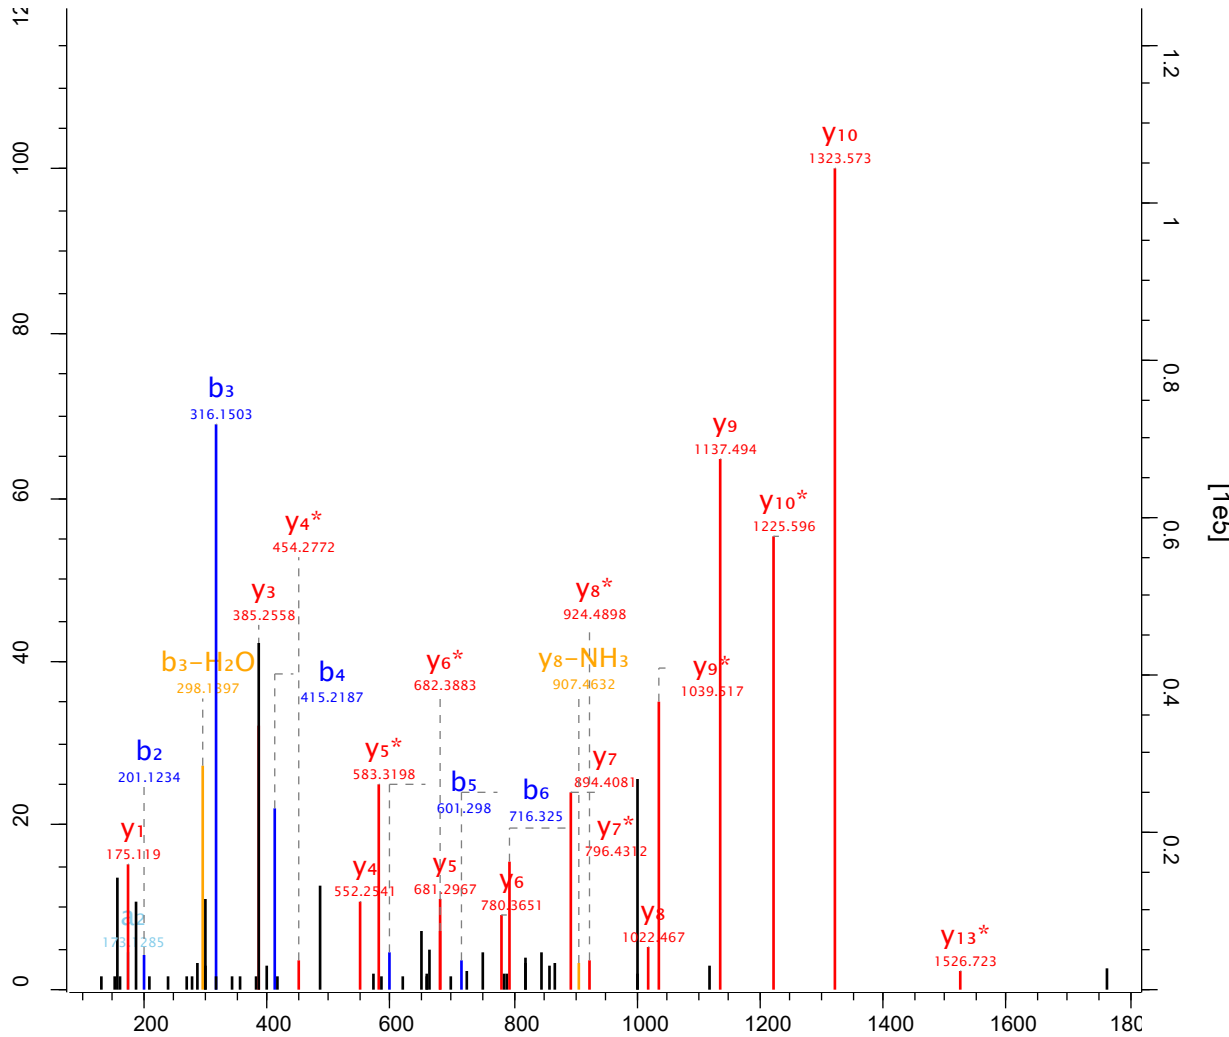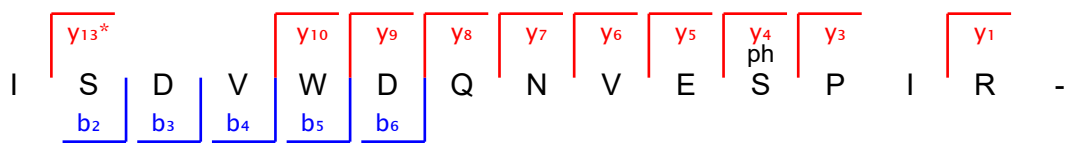

Raw file Scan Method Score m/z  
 sys\_15\_1 32823 FTMS; HCD 108.72 876.41

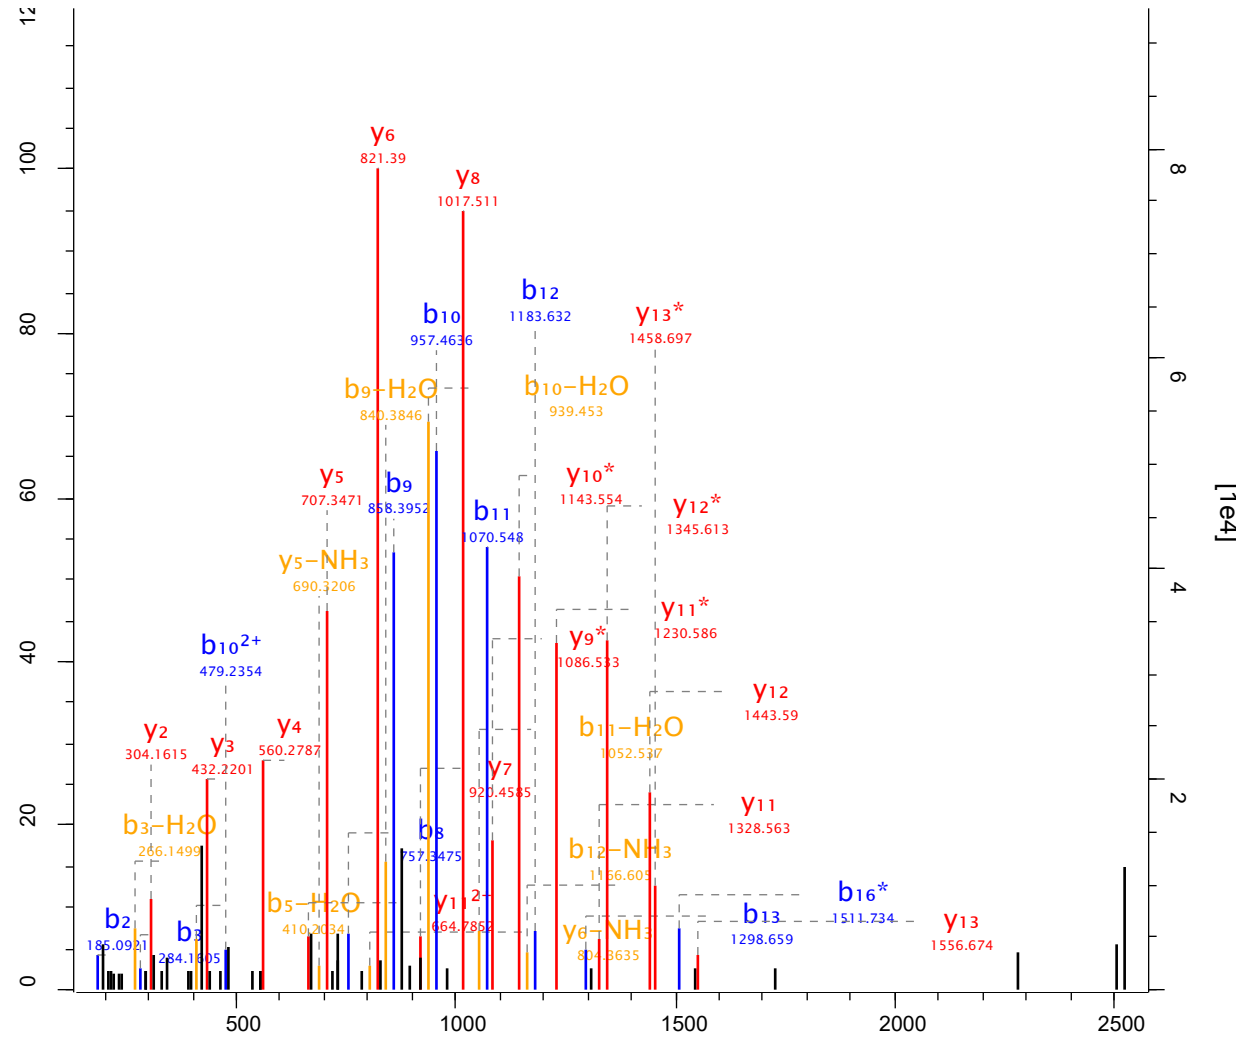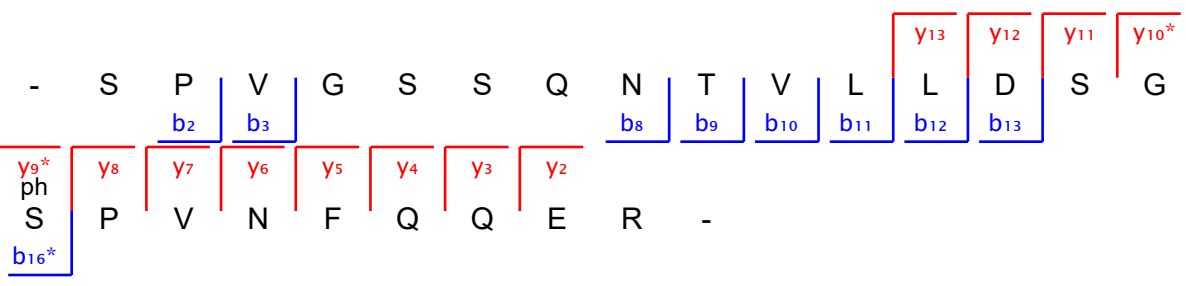



Raw file Scan Method Score m/z  
 sys\_15\_1 32848 FTMS; HCD 67.14 881.37

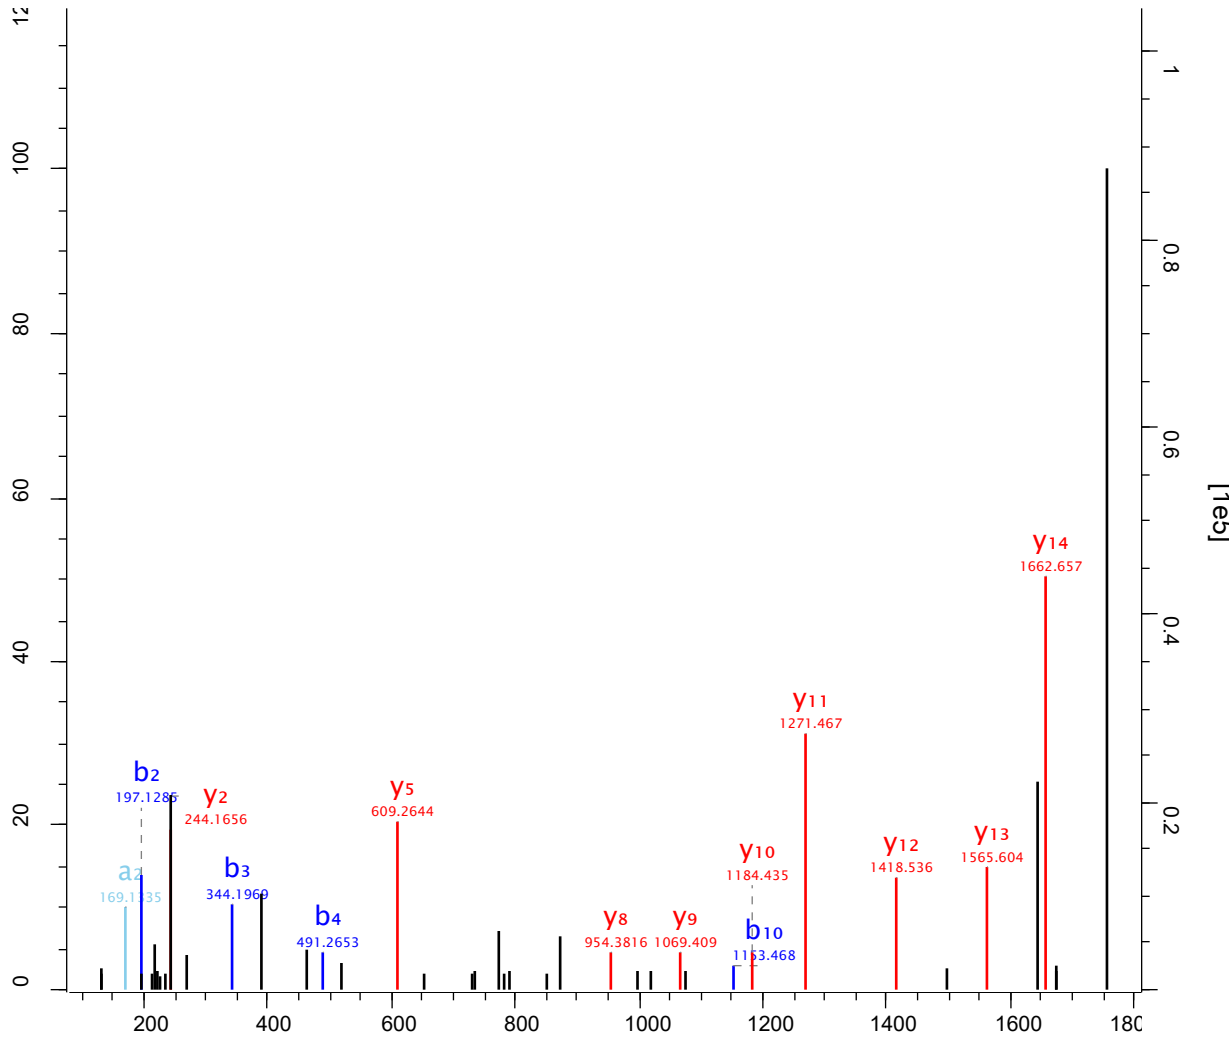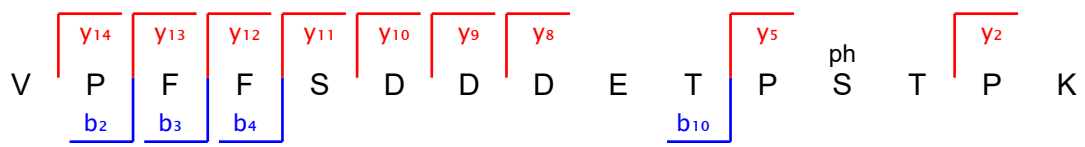

Raw file Scan Method Score m/z  
 sys\_15\_1 32999 FTMS; HCD 88.28 815.83

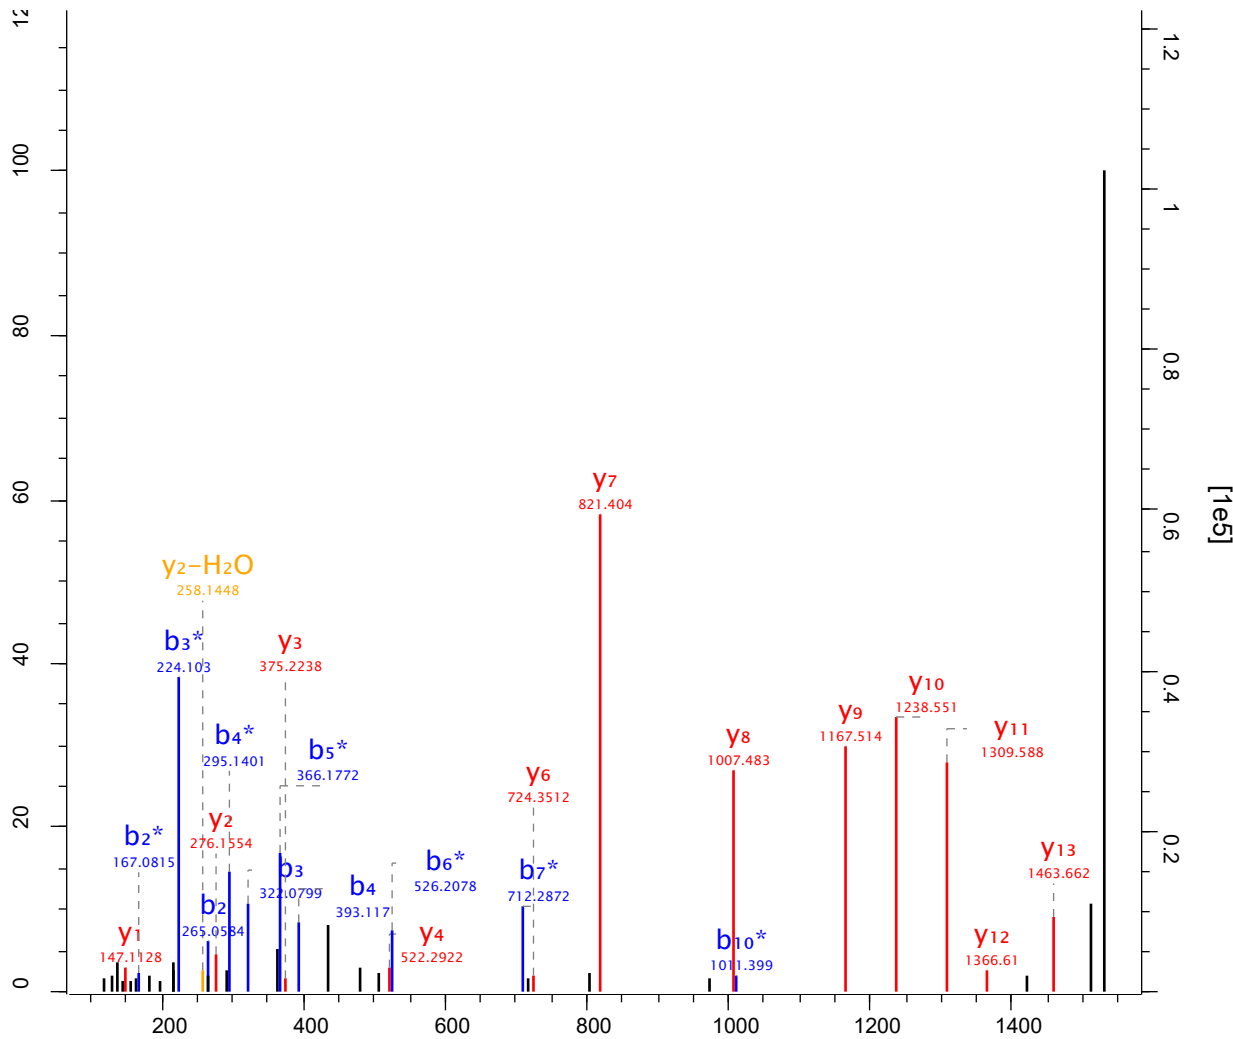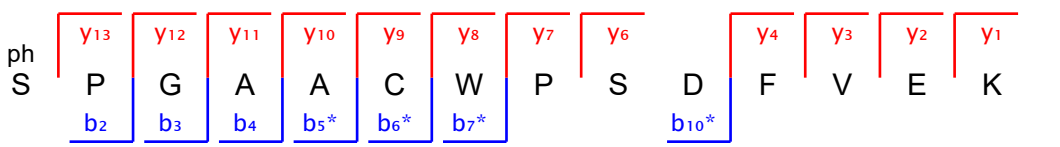

Raw file Scan Method Score m/z  
 sys\_15\_1 3321 FTMS; HCD 103.01 670.3

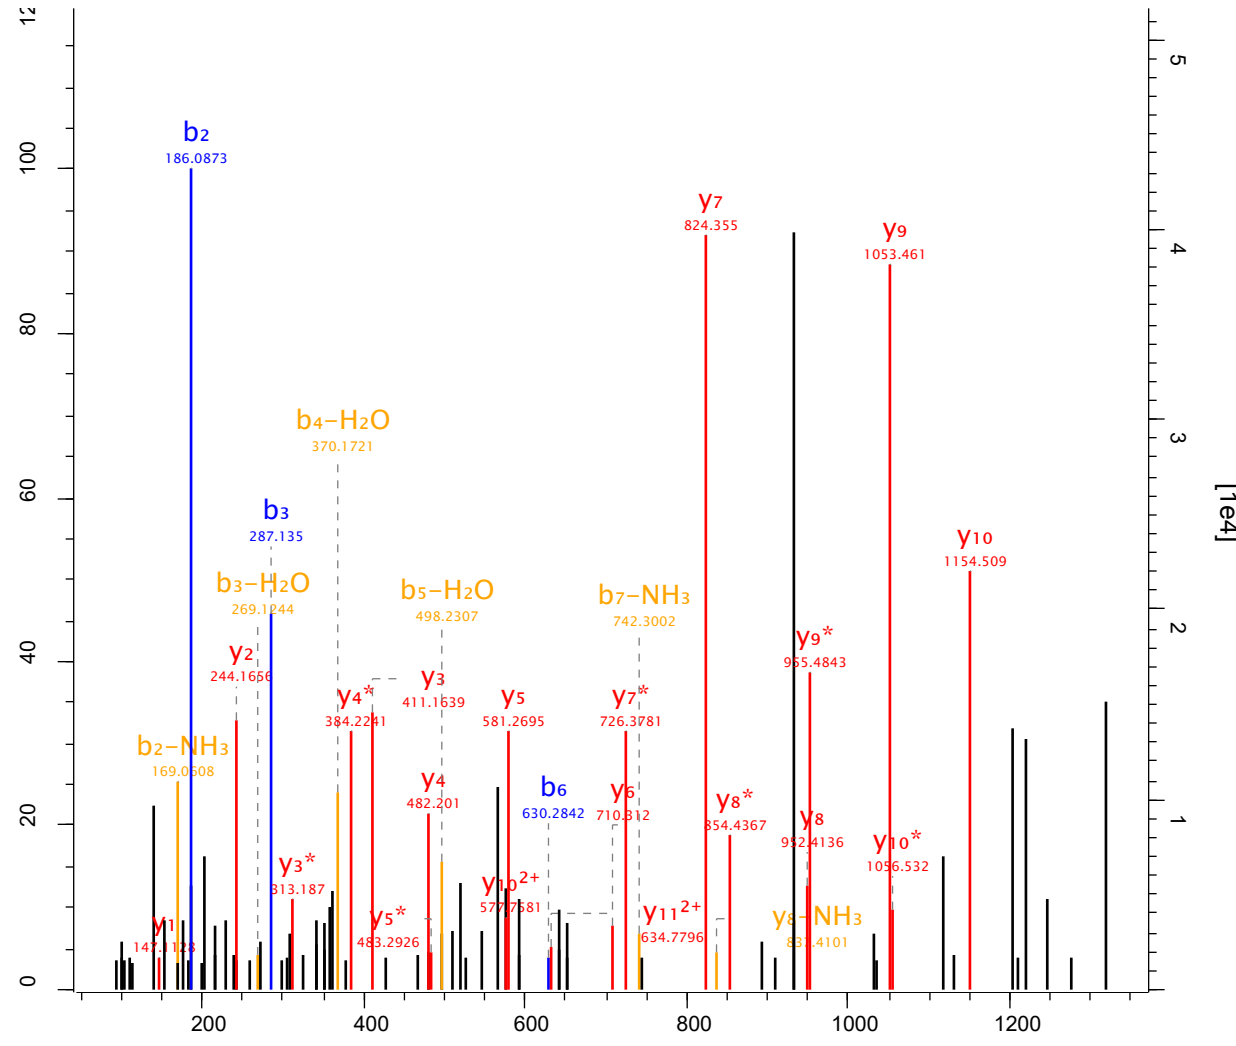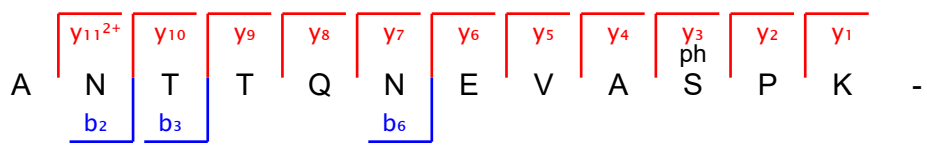

Raw file Scan Method Score m/z  
 sys\_15\_1 33364 FTMS; HCD 250.94 818.37

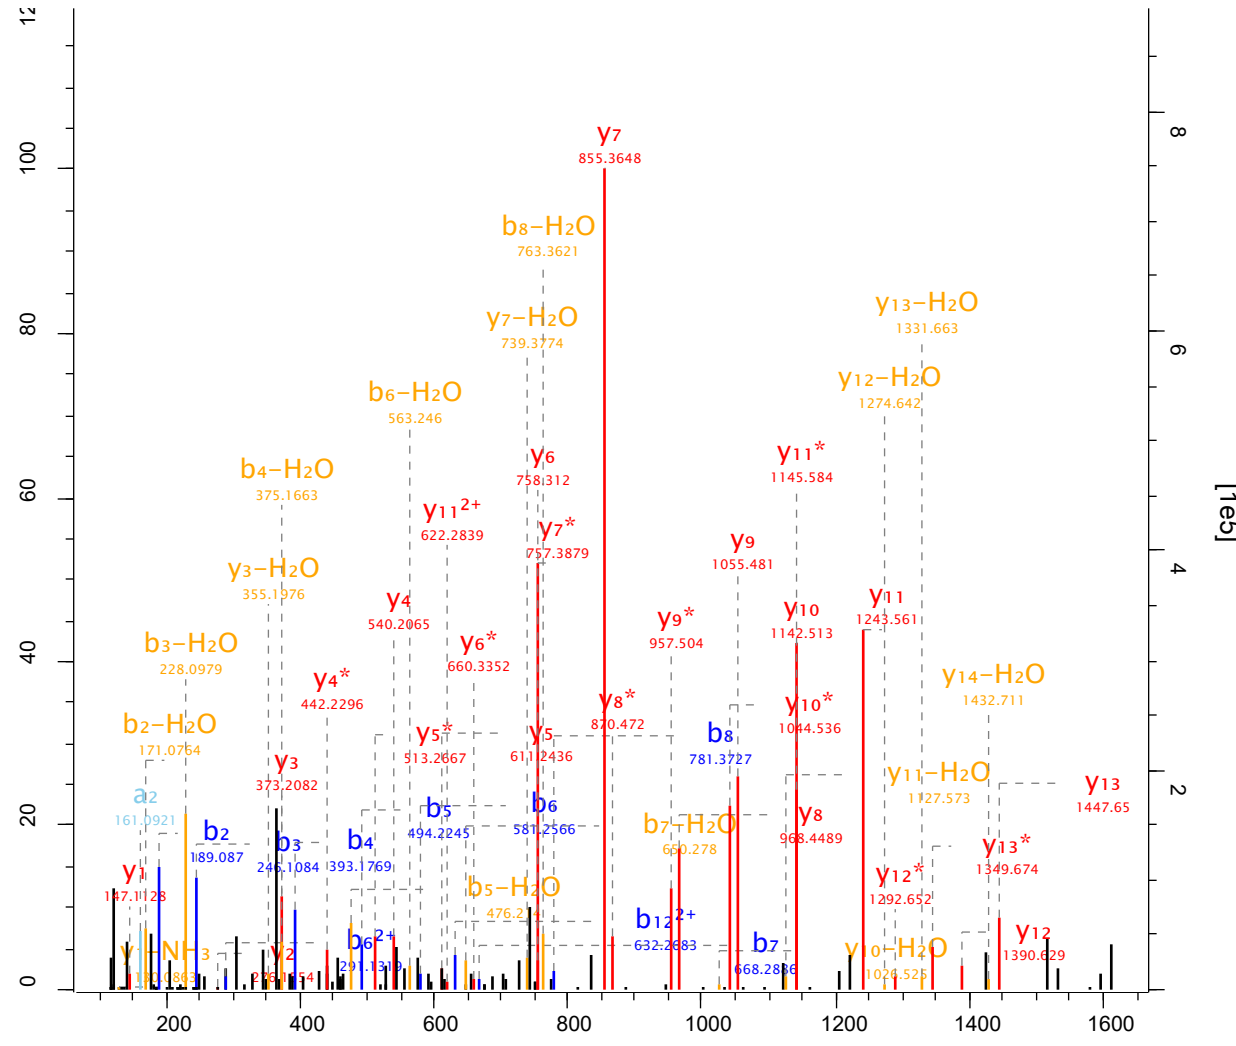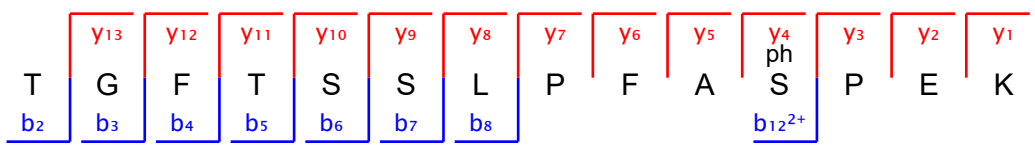

Raw file Scan Method Score m/z  
 sys\_15\_1 3348 FTMS; HCD 87.12 474.18

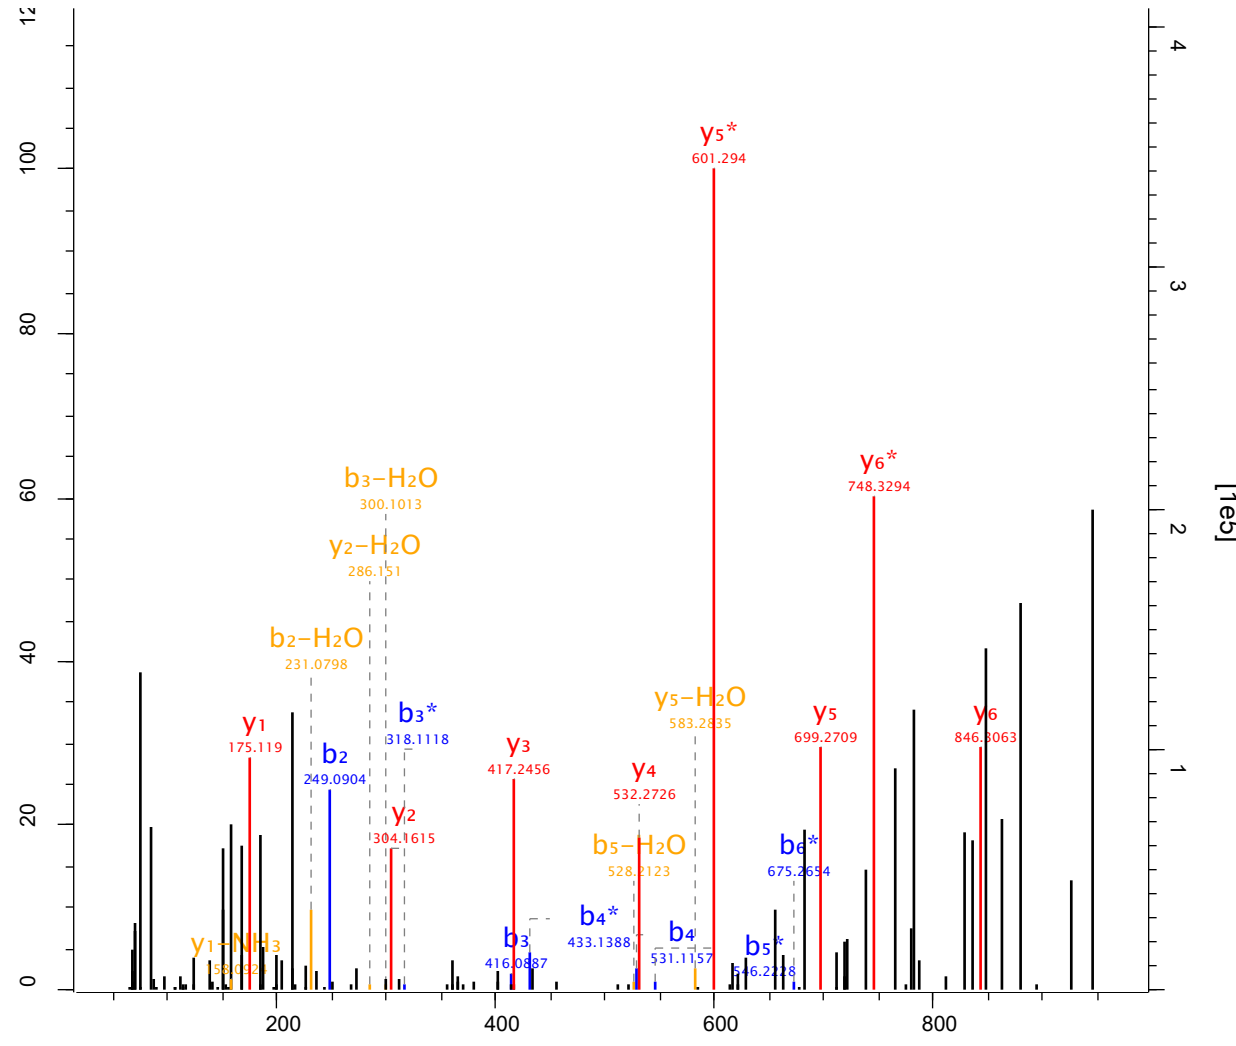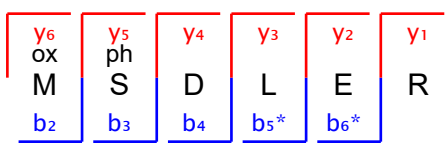

Raw file Scan Method Score m/z  
 sys\_15\_1 3351 FTMS; HCD 122.33 593.76

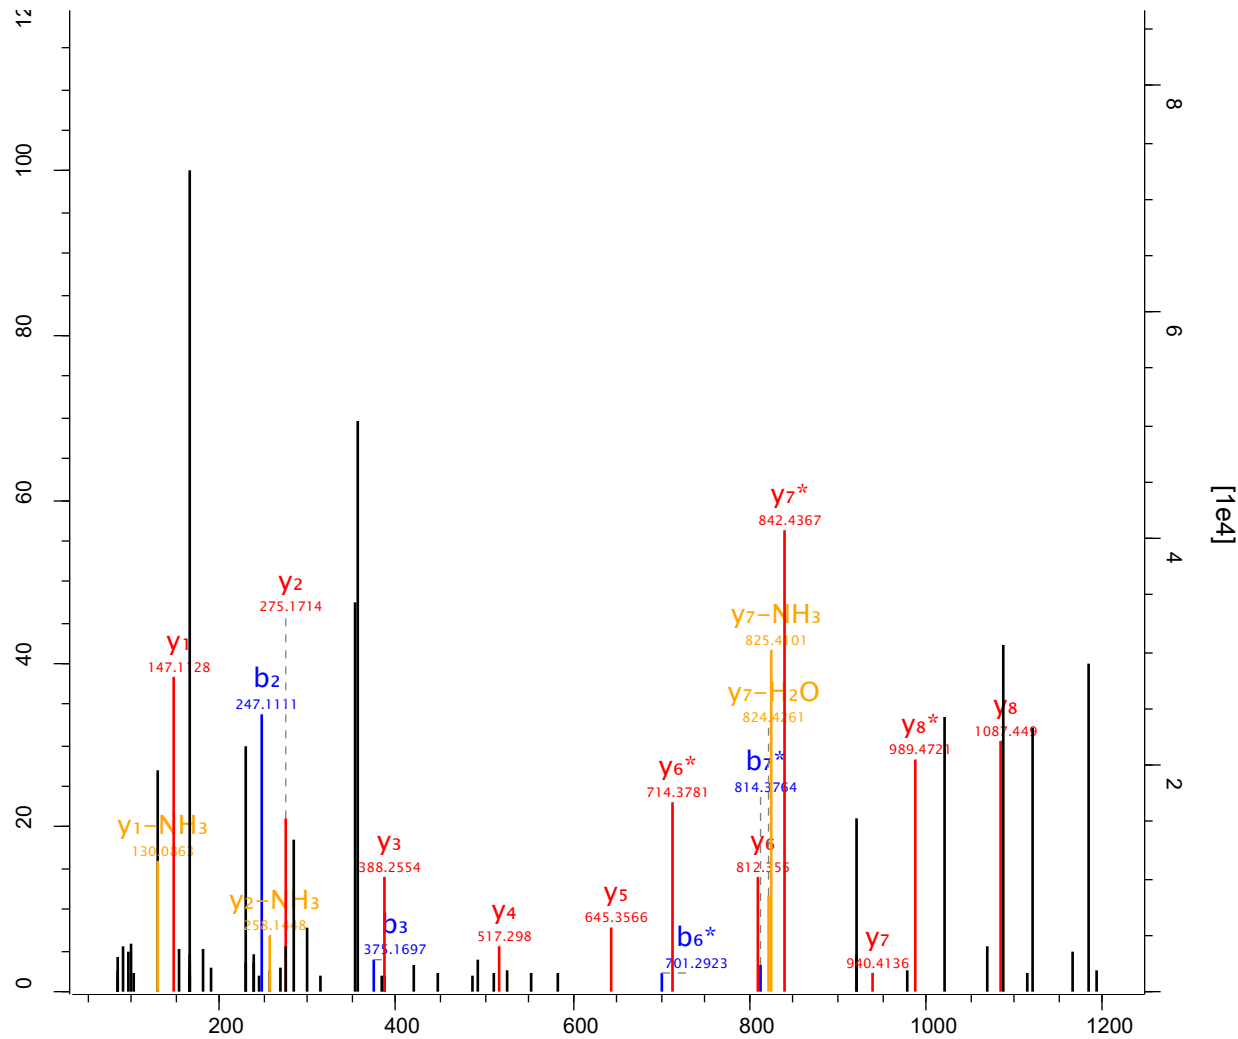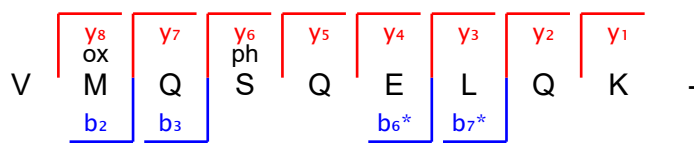

Raw file Scan Method Score m/z  
 sys\_15\_1 33585 FTMS; HCD 46.07 642.78

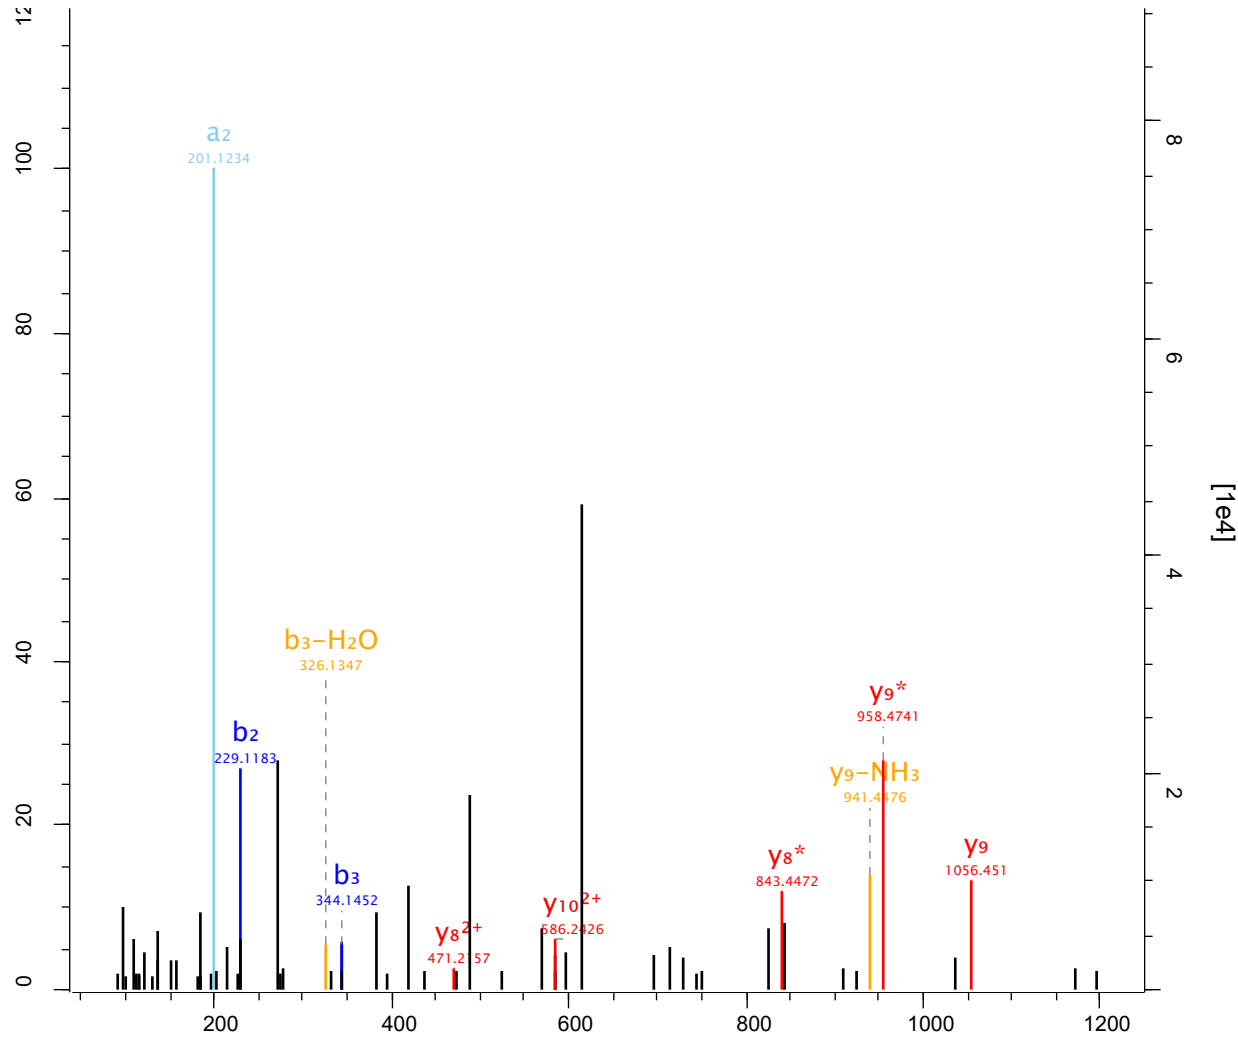

- L y<sub>10</sub><sup>2+</sup> y<sub>9</sub> y<sub>8</sub>\* ph  
 - L D D W V L G S S G R -  
b<sub>2</sub> b<sub>3</sub>

Raw file Scan Method Score m/z  
 sys\_15\_1 3379 FTMS; HCD 62.17 533.73

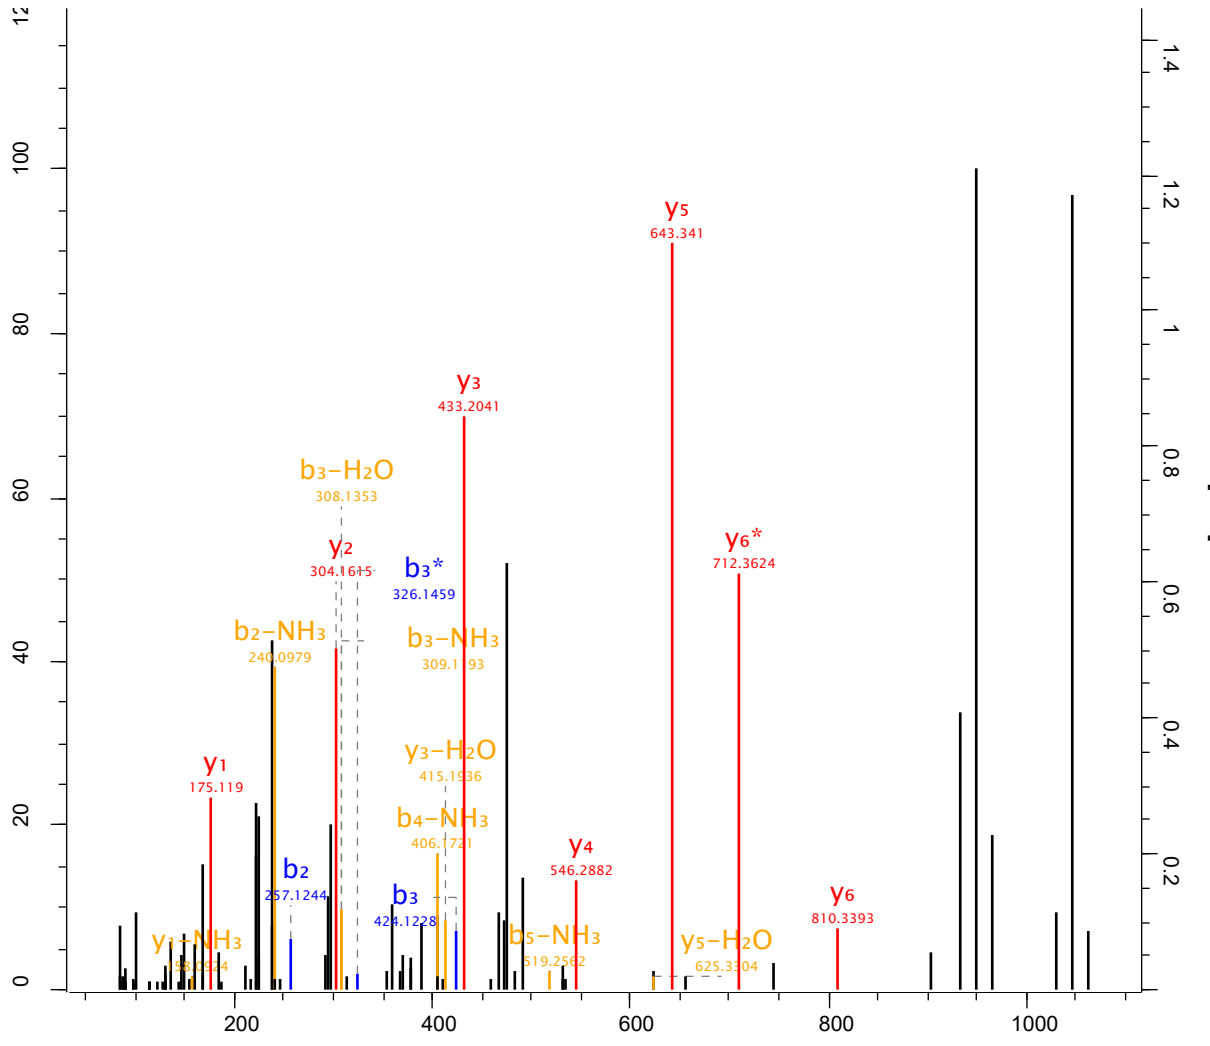

- Q Q y6  
ph  
S y5 y4 y3 y2 y1 -  
b2 b3 P I E E R



Raw file Scan Method Score m/z  
 sys\_15\_1 34031 FTMS; HCD 117 804.36

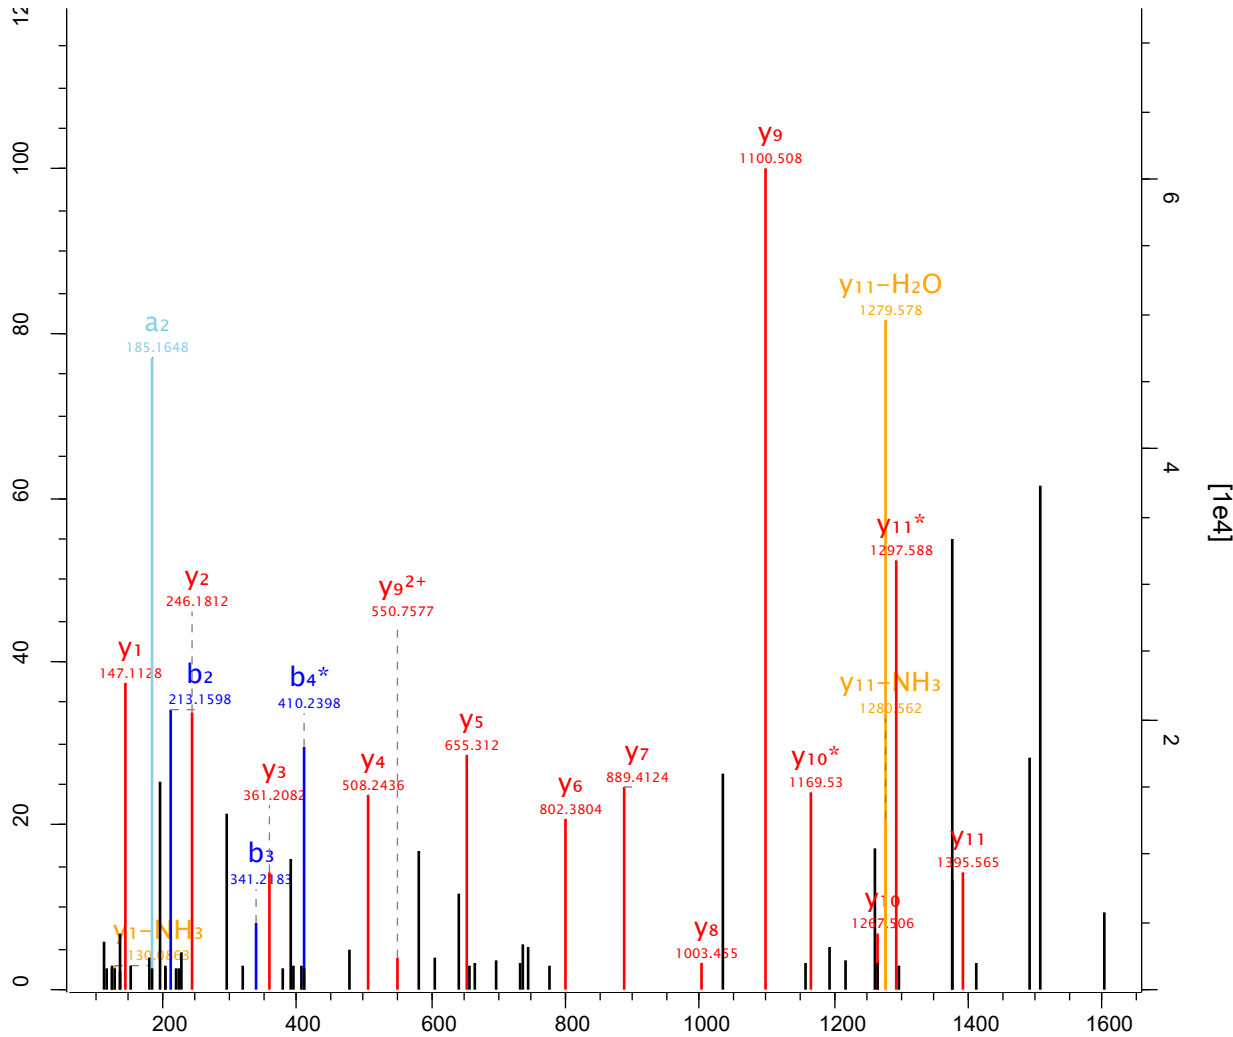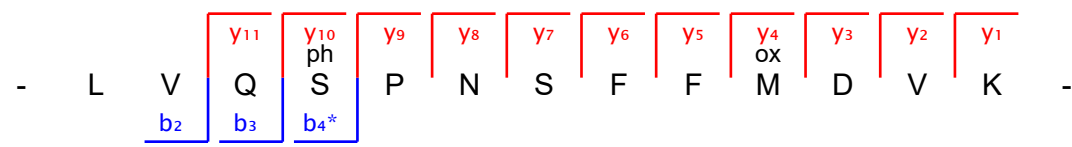

| Raw file | Scan | Method    | Score | m/z    |
|----------|------|-----------|-------|--------|
| sys_15_1 | 3430 | FTMS; HCD | 64.71 | 435.19 |

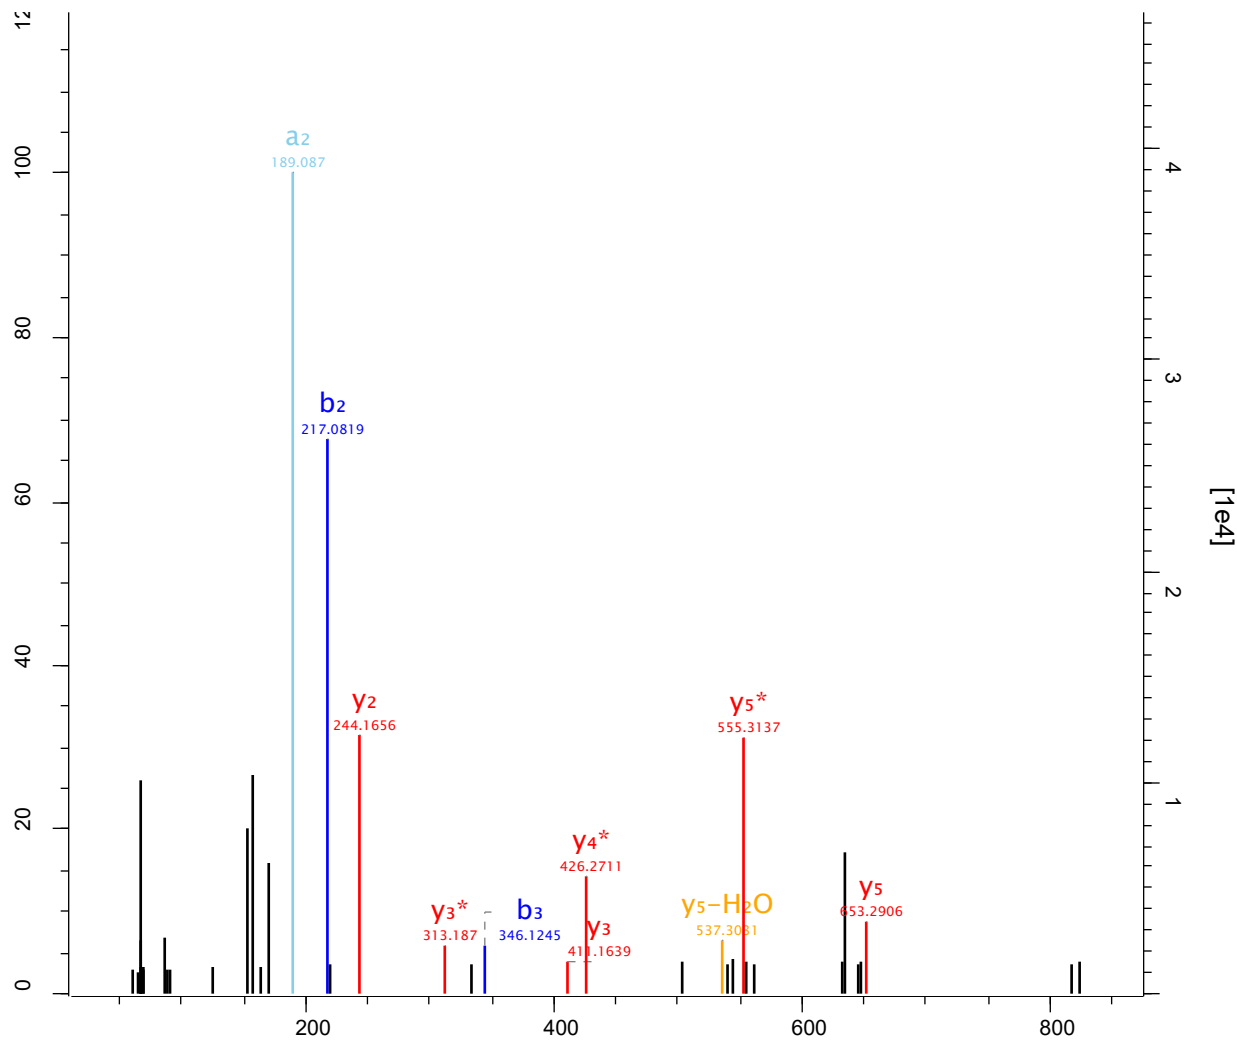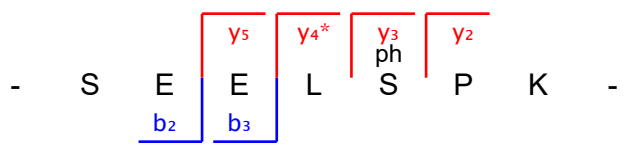

Raw file Scan Method Score m/z  
 sys\_15\_1 34334 FTMS; HCD 62.05 881.69

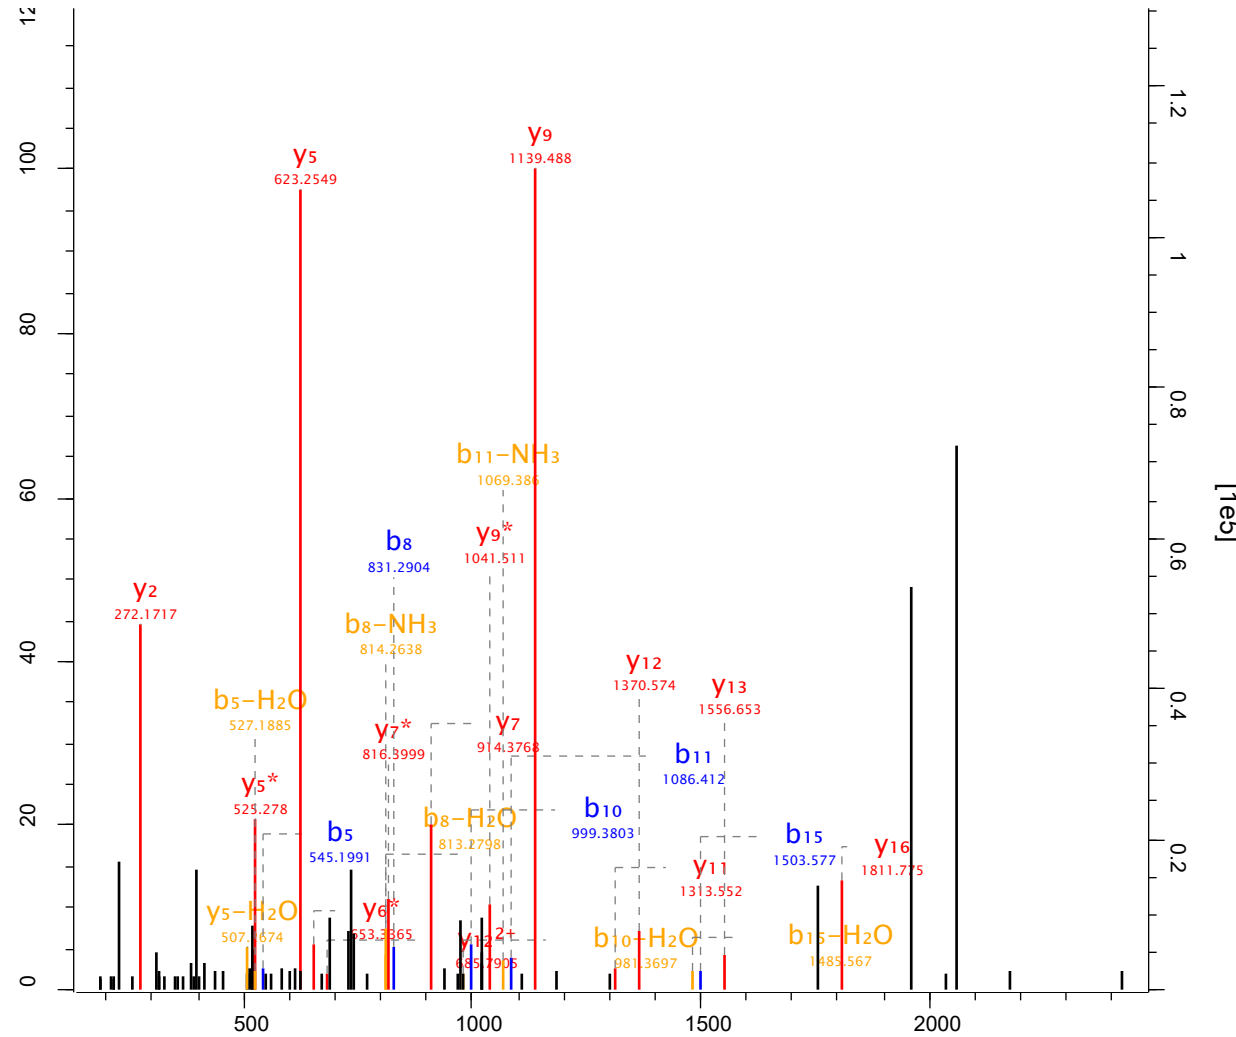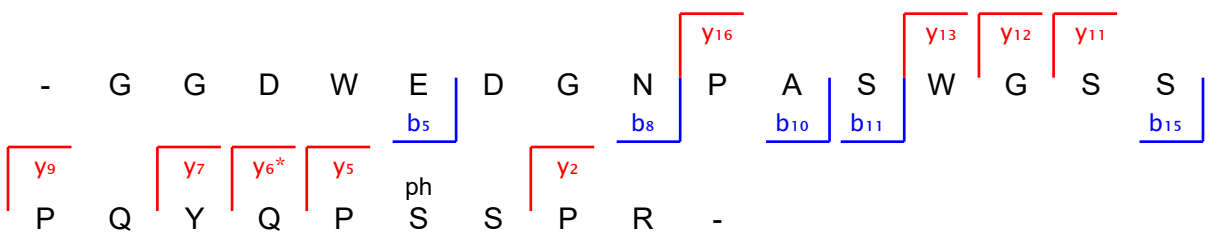

Raw file Scan Method Score m/z  
 sys\_15\_1 34340 FTMS; HCD 79.69 1104.43

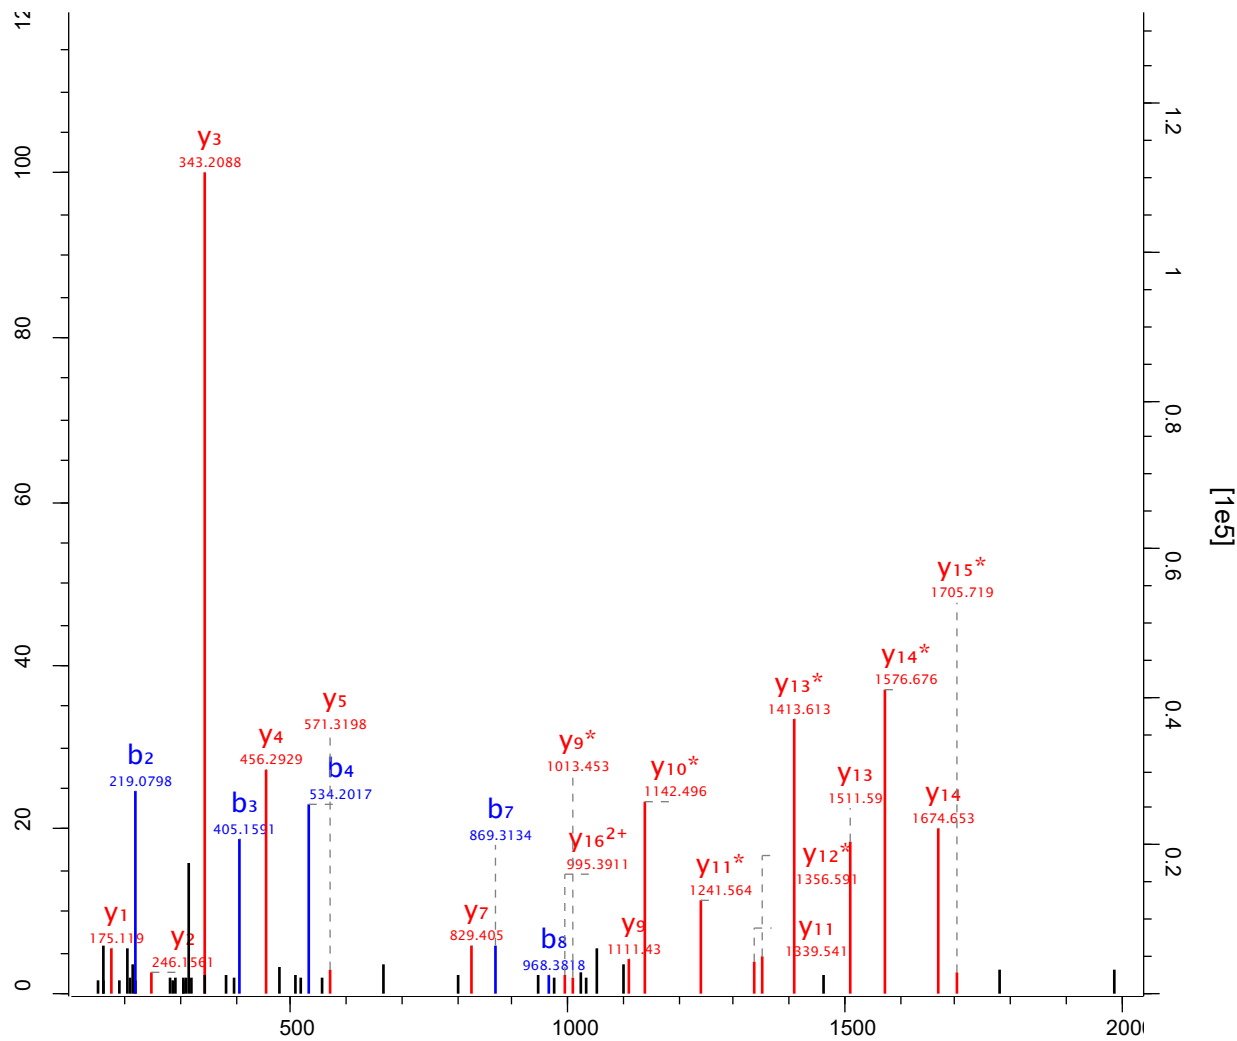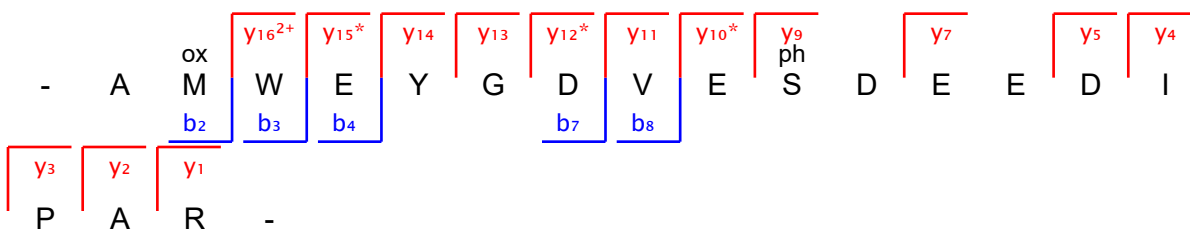

Raw file Scan Method Score m/z  
 sys\_15\_1 34631 FTMS; HCD 42.71 884.07

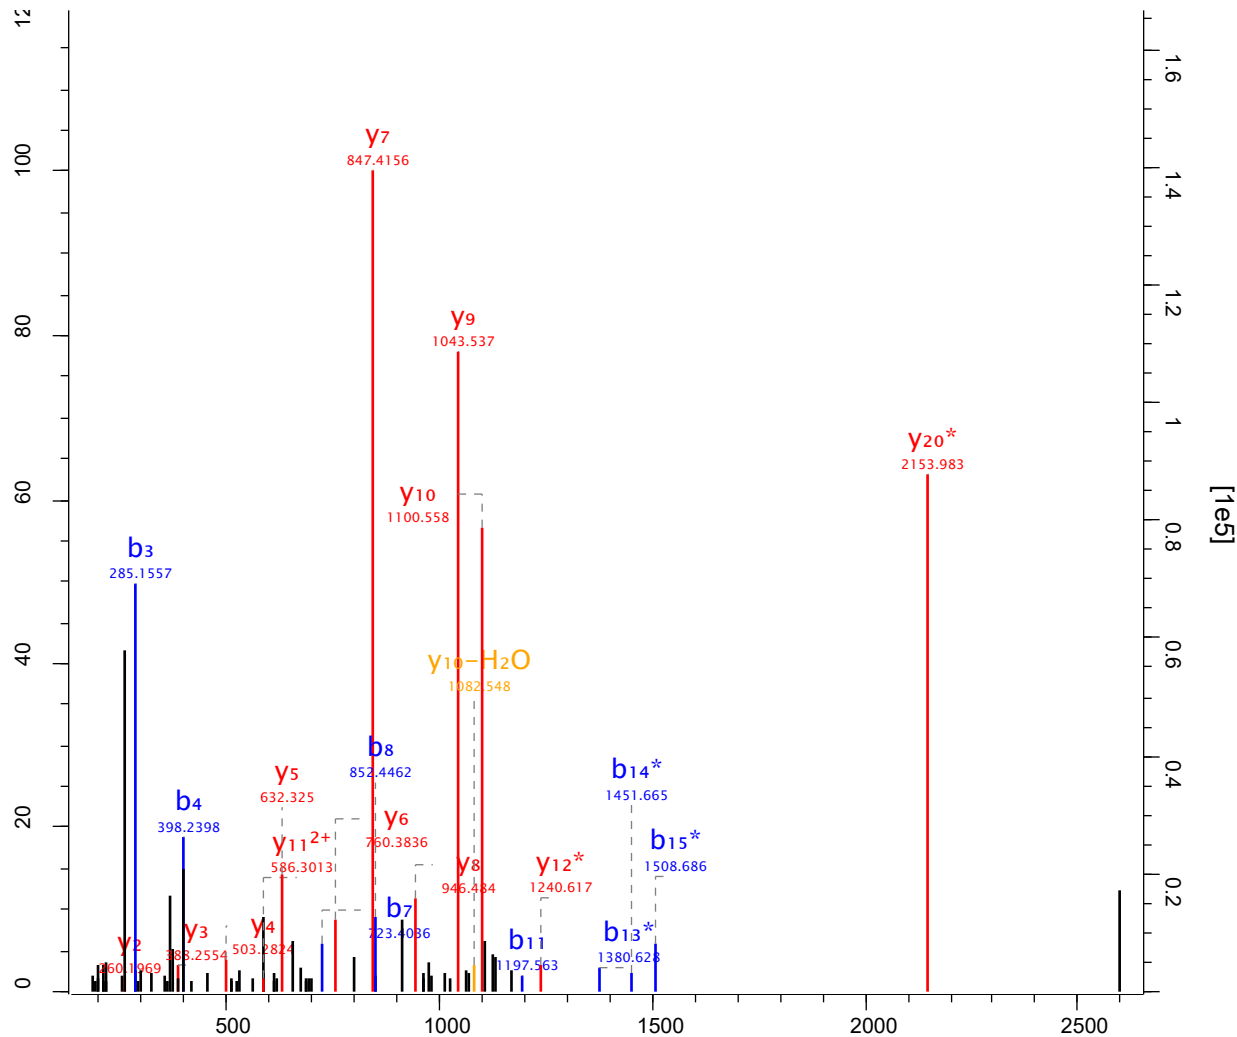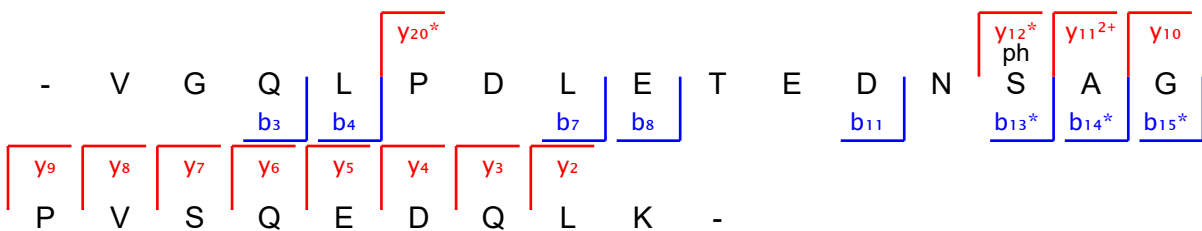

Raw file Scan Method Score m/z  
 sys\_15\_1 34723 FTMS; HCD 40.68 1030.13

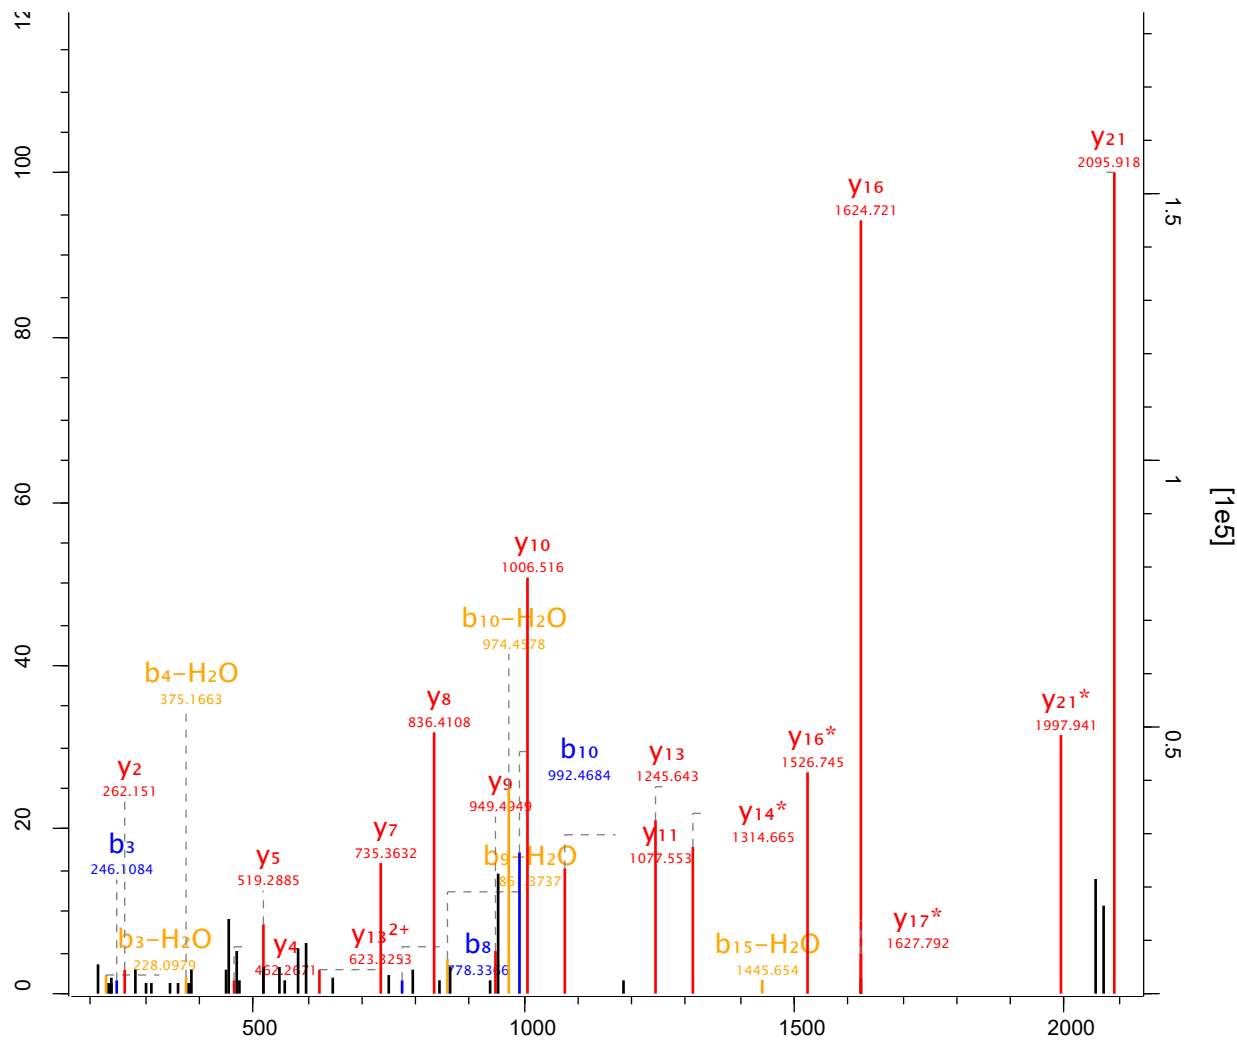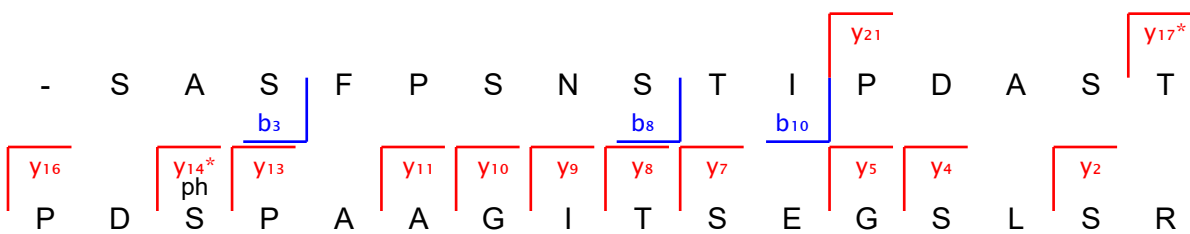

Raw file Scan Method Score m/z  
 sys\_15\_1 34929 FTMS; HCD 182.76 819.88

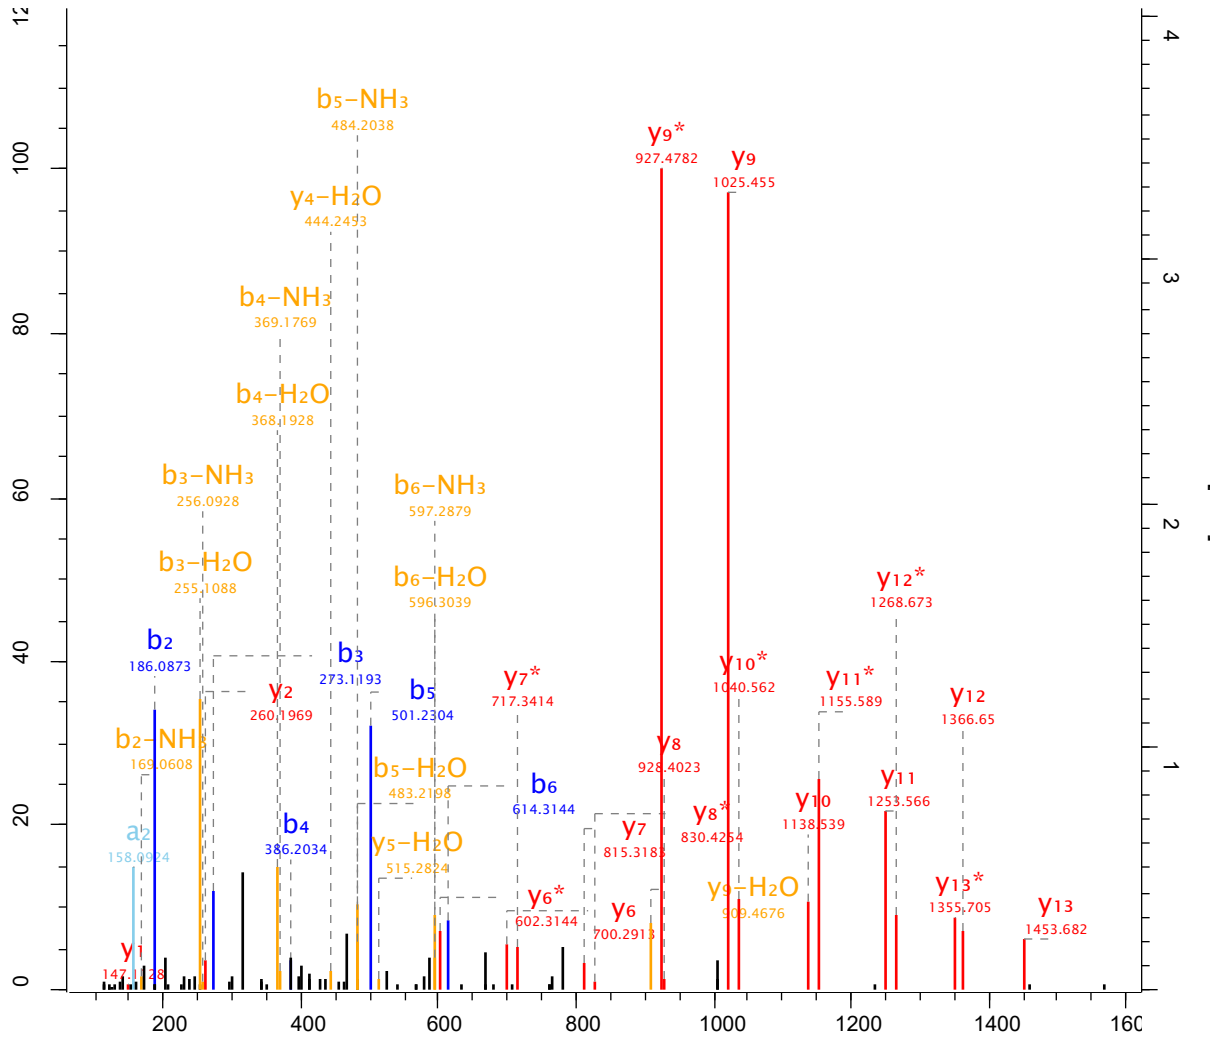

- N A S I D I P L D S A S D L K

b<sub>2</sub>
b<sub>3</sub>
b<sub>4</sub>
b<sub>5</sub>
b<sub>6</sub>
y<sub>13</sub>
y<sub>12</sub>
y<sub>11</sub>
y<sub>10</sub>
y<sub>9</sub>
y<sub>8</sub>
y<sub>7</sub>
y<sub>6</sub>  
ph
y<sub>2</sub>
y<sub>1</sub>

Raw file Scan Method Score m/z  
 sys\_15\_1 34951 FTMS; HCD 134.64 906.4

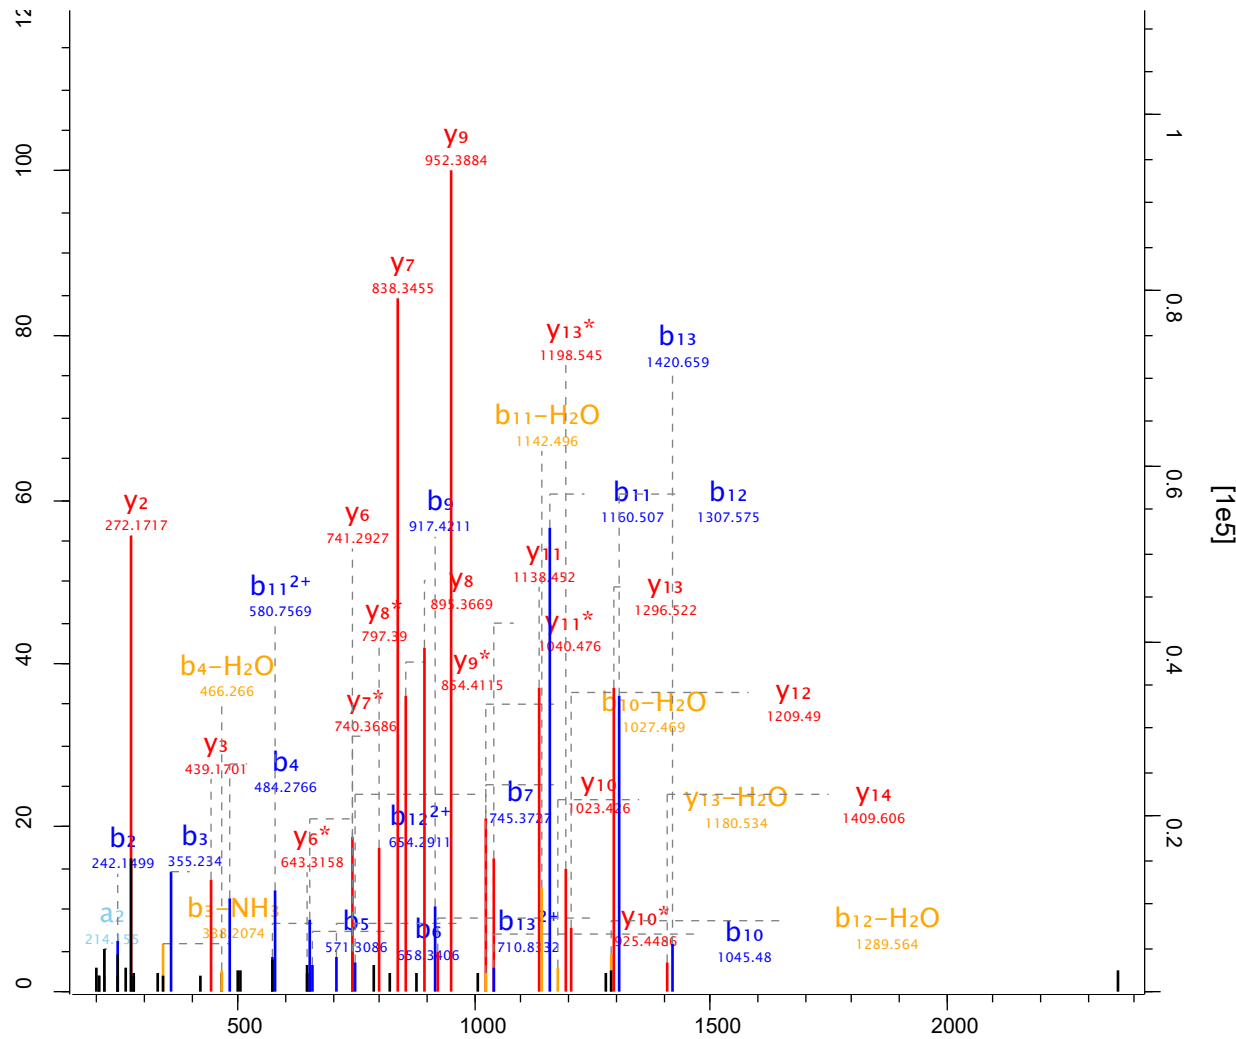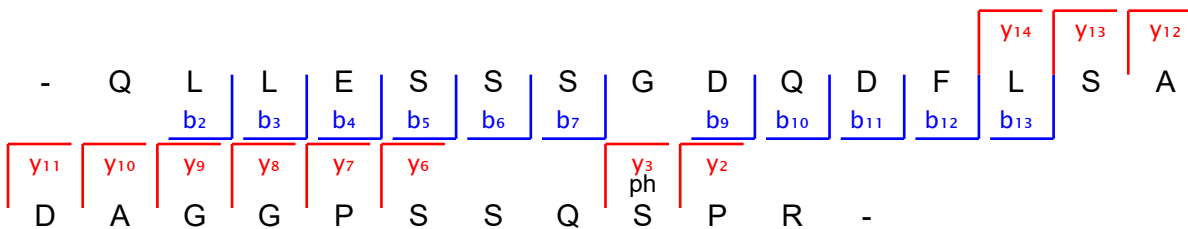



Raw file Scan Method Score m/z  
 sys\_15\_1 35311 FTMS; HCD 50.83 842.91

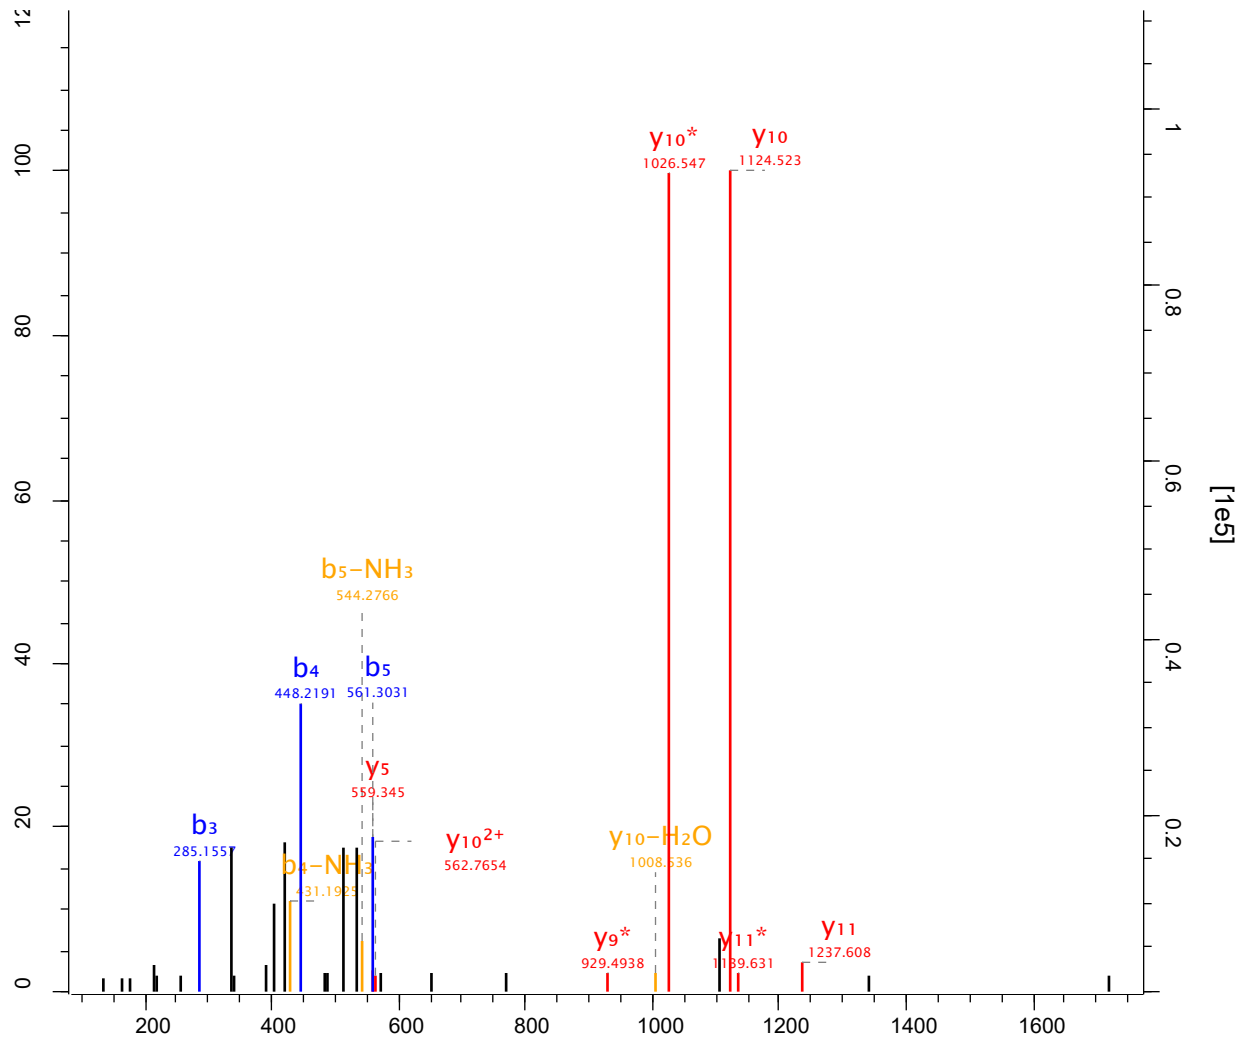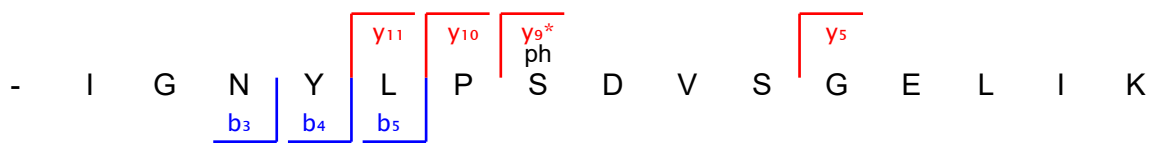

Raw file Scan Method Score m/z  
 sys\_15\_1 35426 FTMS; HCD 109.65 926.92

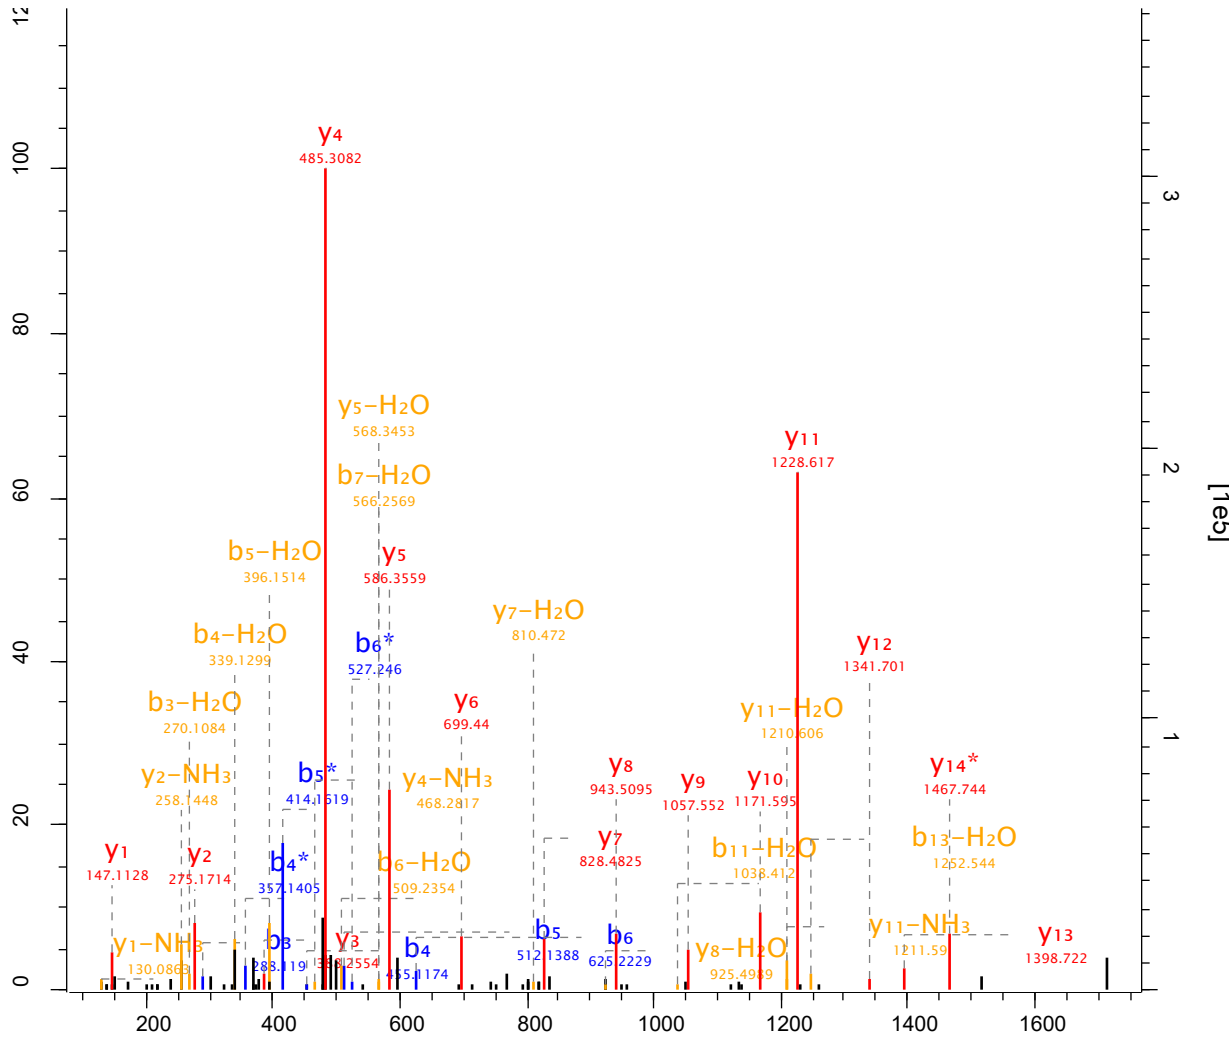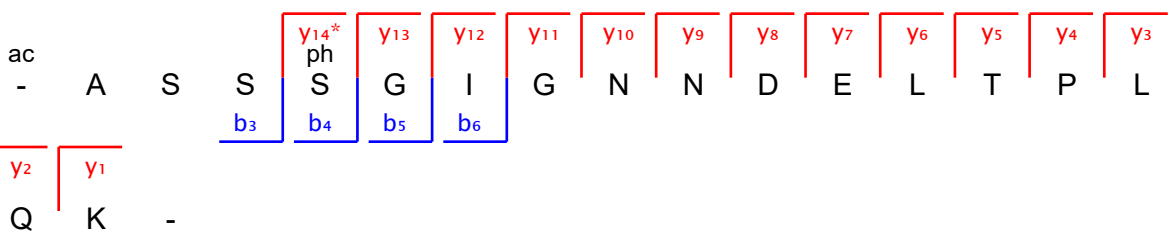

Raw file Scan Method Score m/z  
 sys\_15\_1 35427 FTMS; HCD 57.43 647.78

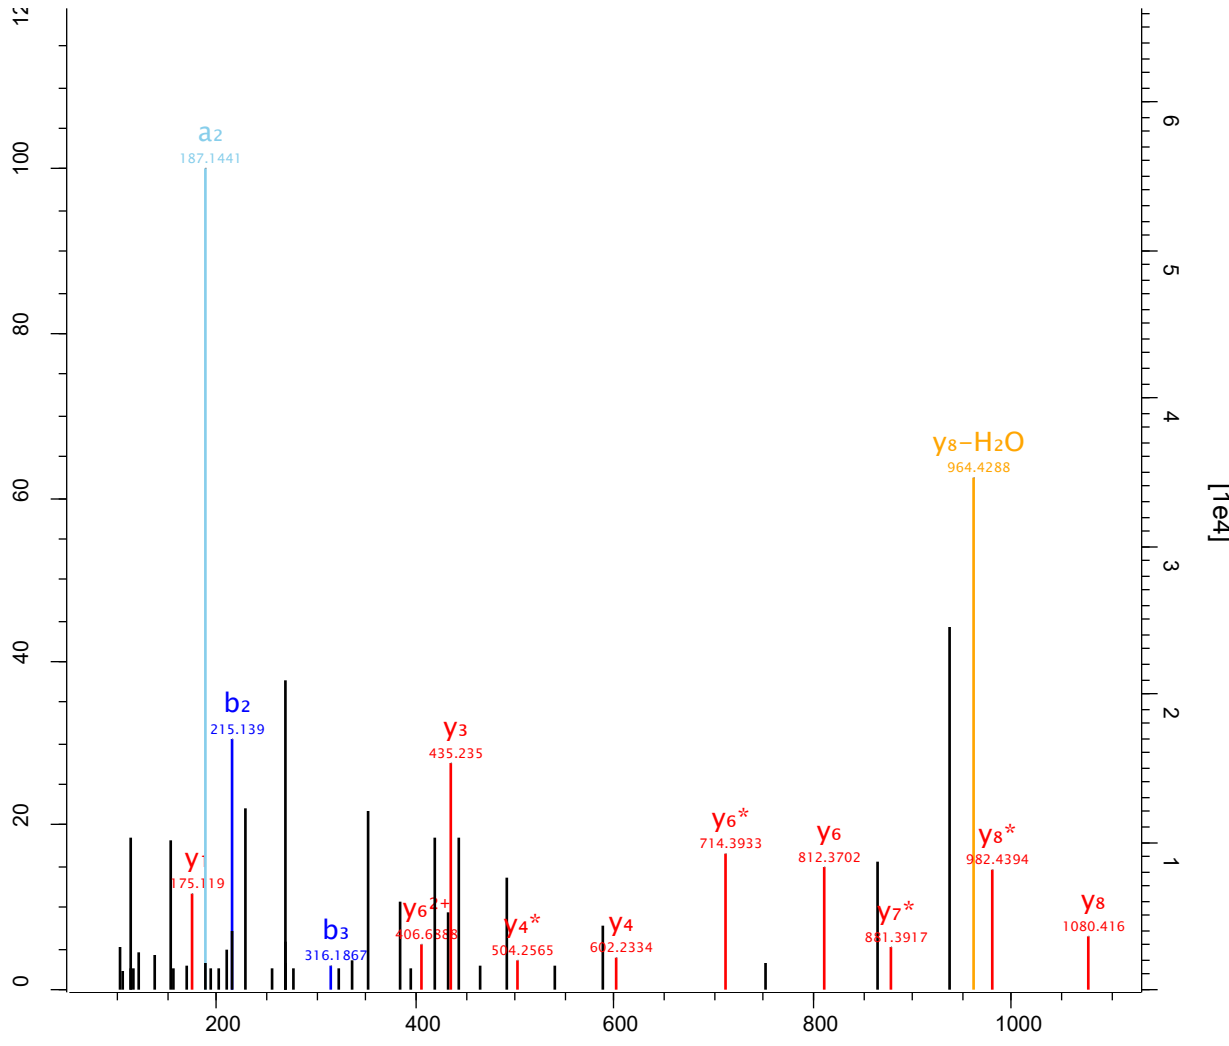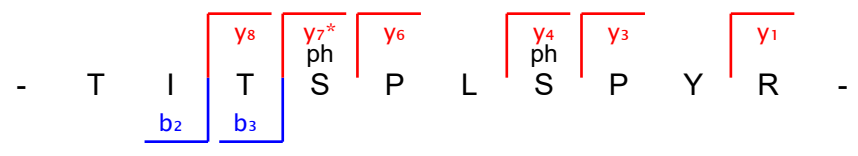

Raw file Scan Method Score m/z  
 sys\_15\_1 35597 FTMS; HCD 159.46 1010.92

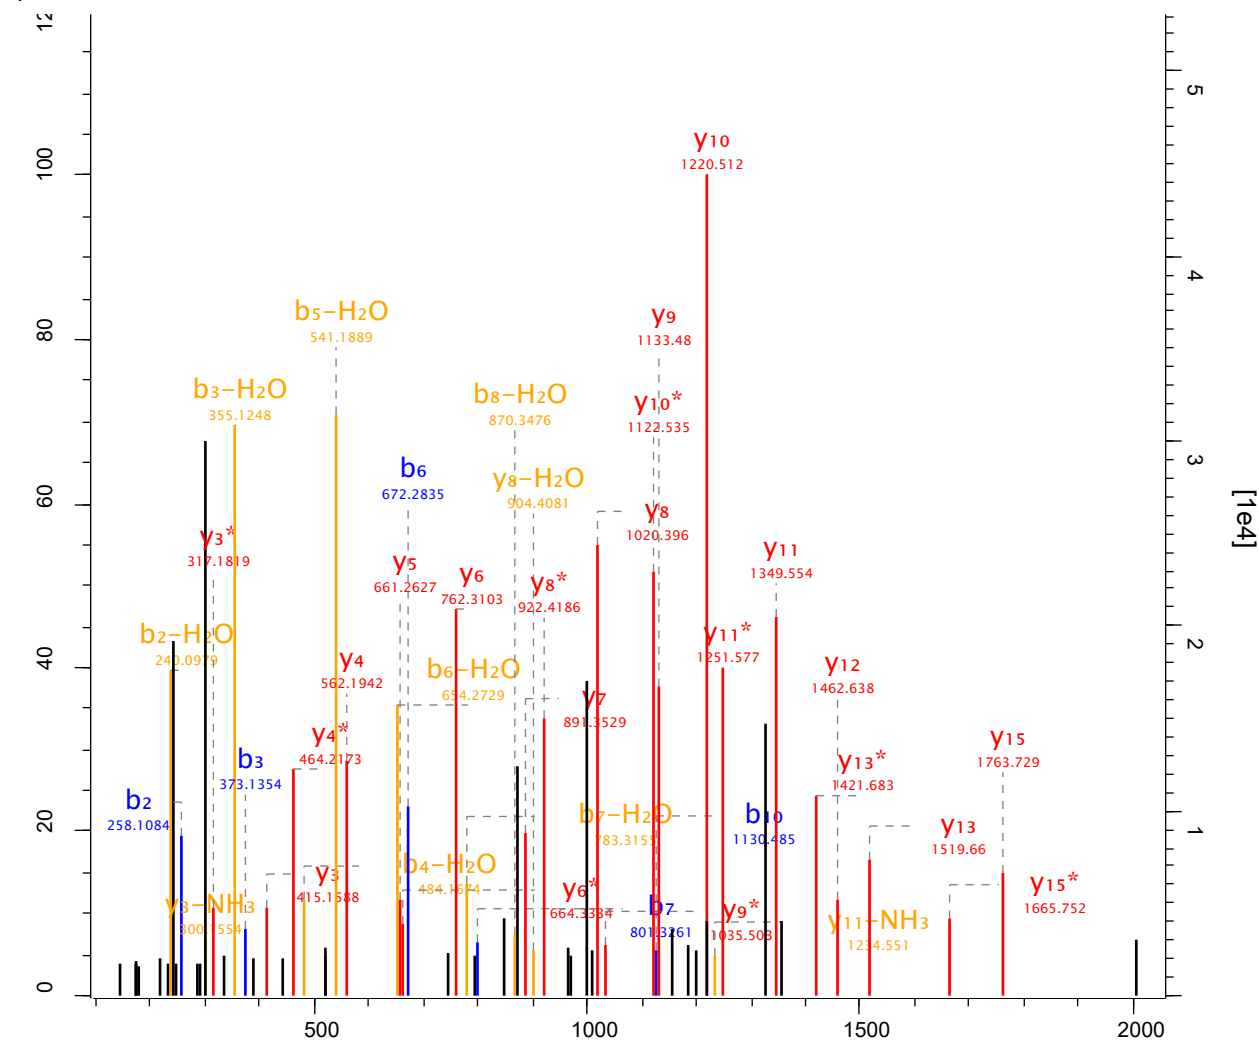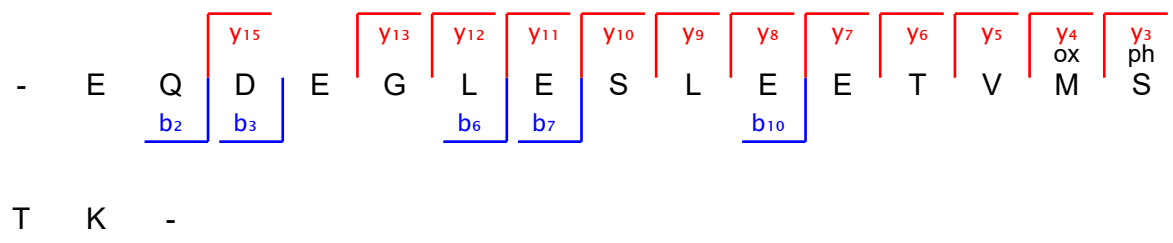

Raw file Scan Method Score m/z  
 sys\_15\_1 3560 FTMS; HCD 271.97 556.89

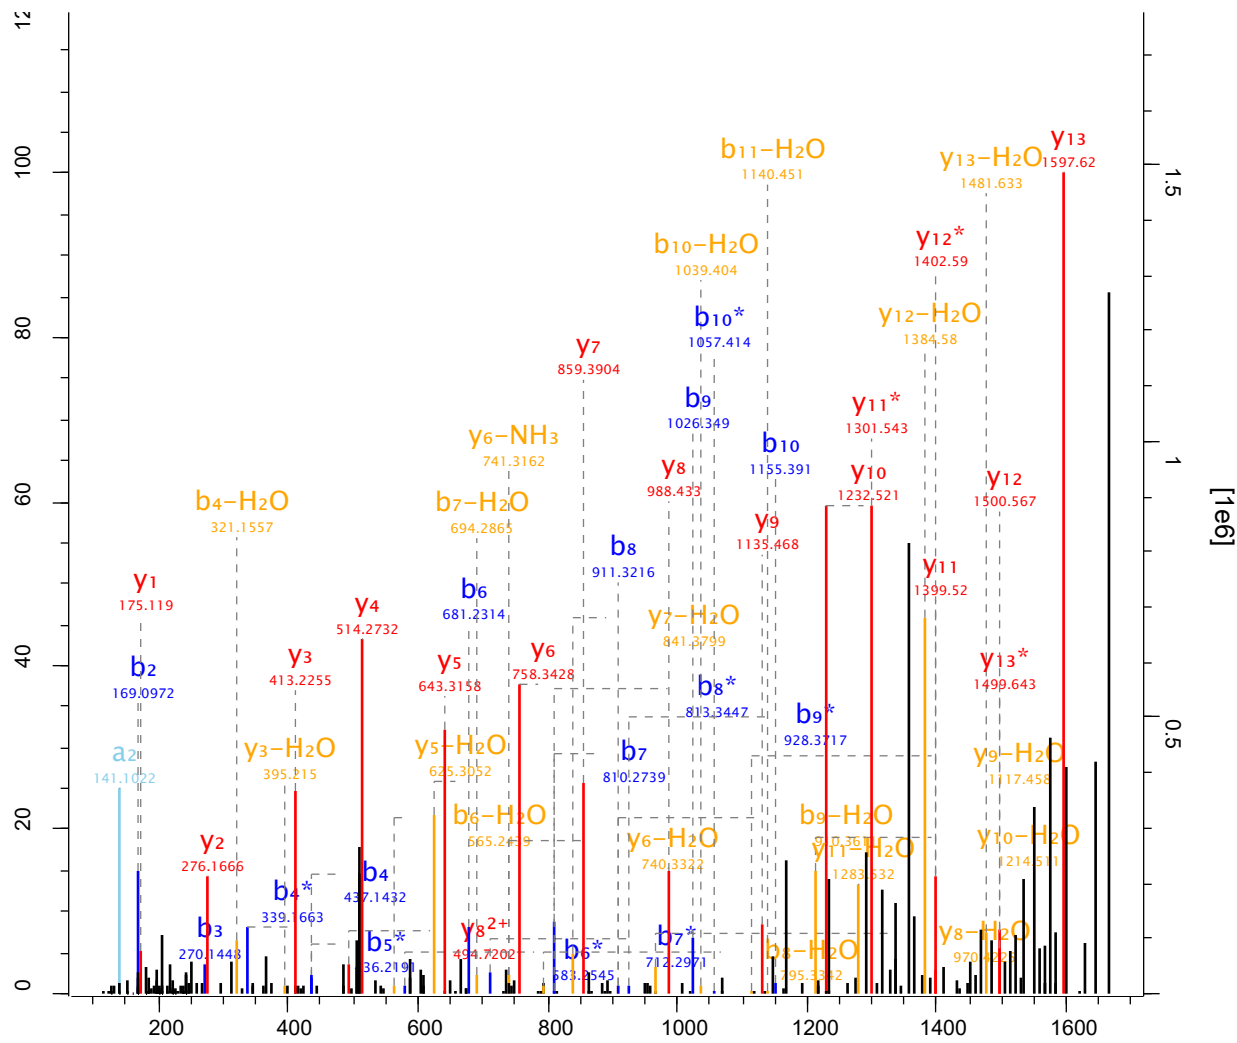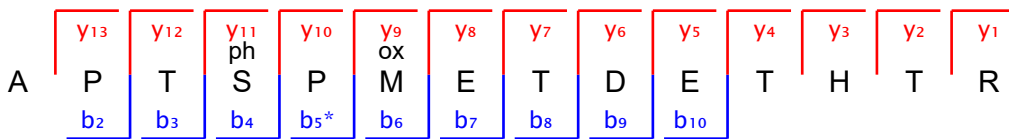

Raw file Scan Method Score m/z  
 sys\_15\_1 35600 FTMS; HCD 210.98 882.42

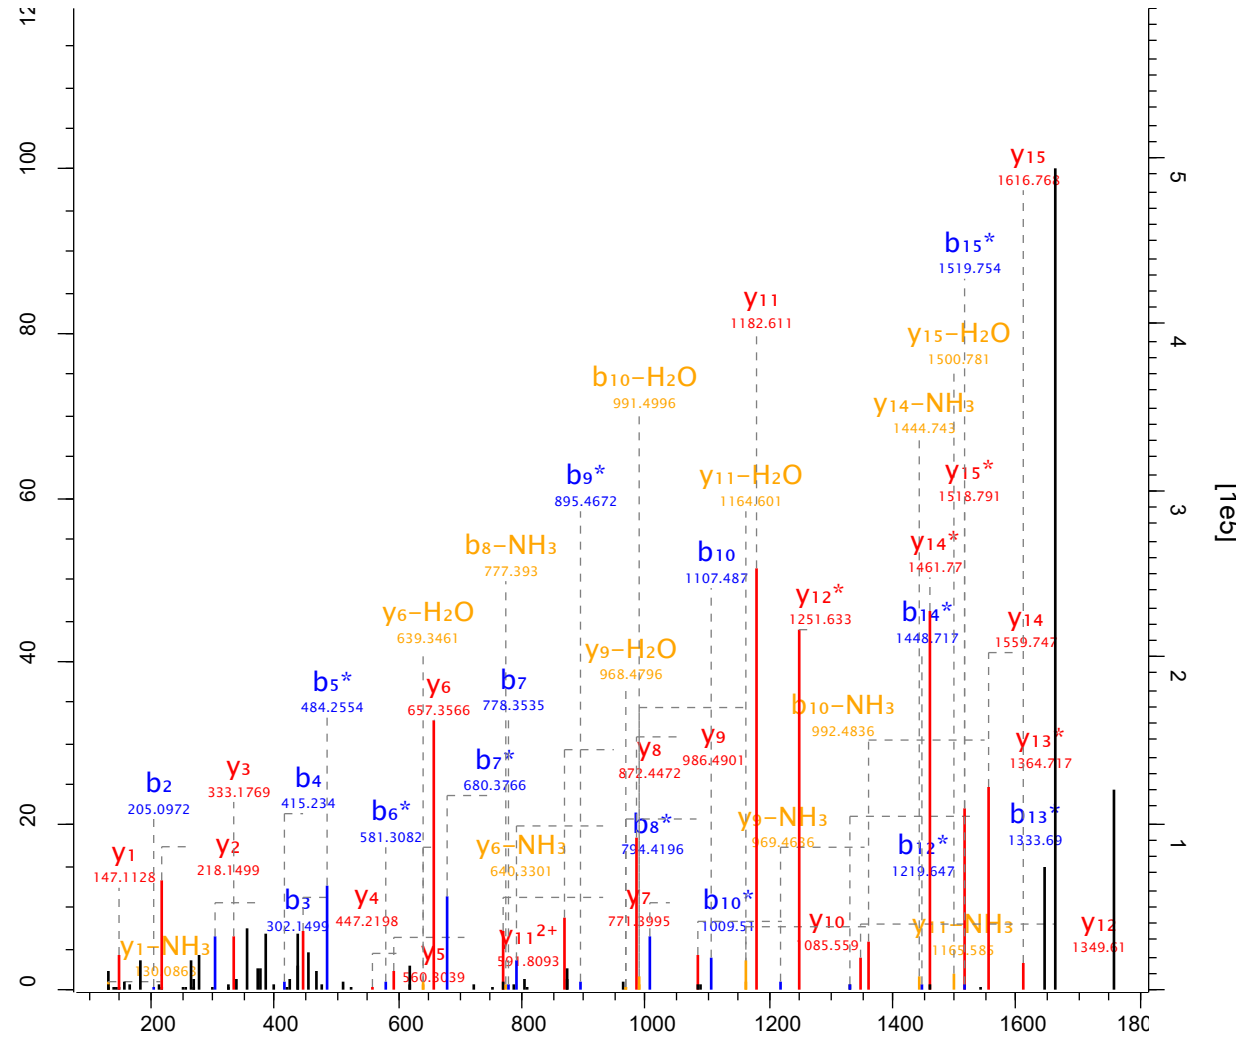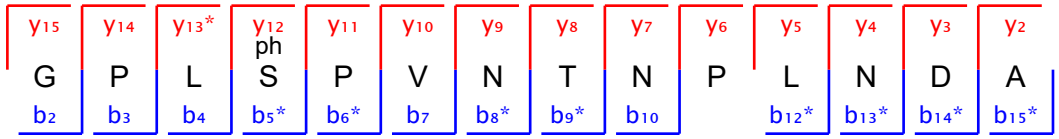

y1  
K -

Raw file Scan Method Score m/z  
 sys\_15\_1 35649 FTMS; HCD 43.79 975.44

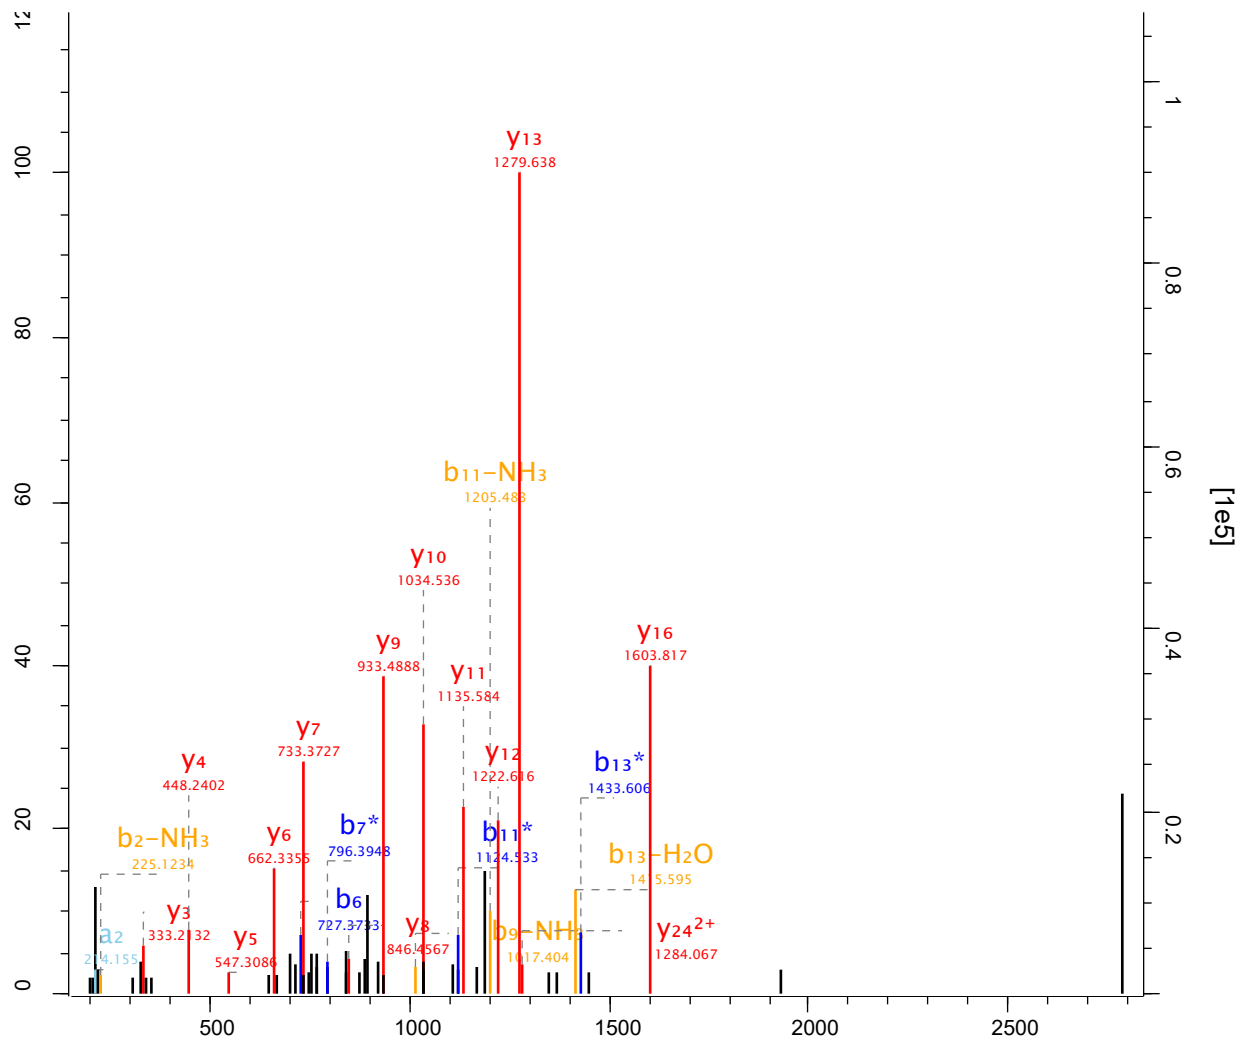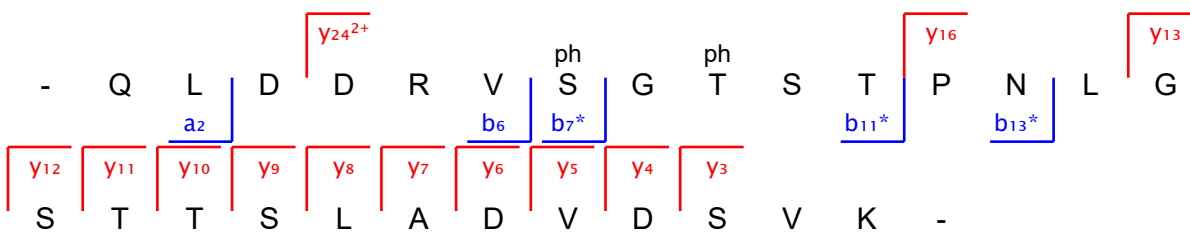

Raw file Scan Method Score m/z  
 sys\_15\_1 35985 FTMS; HCD 56.57 656.87

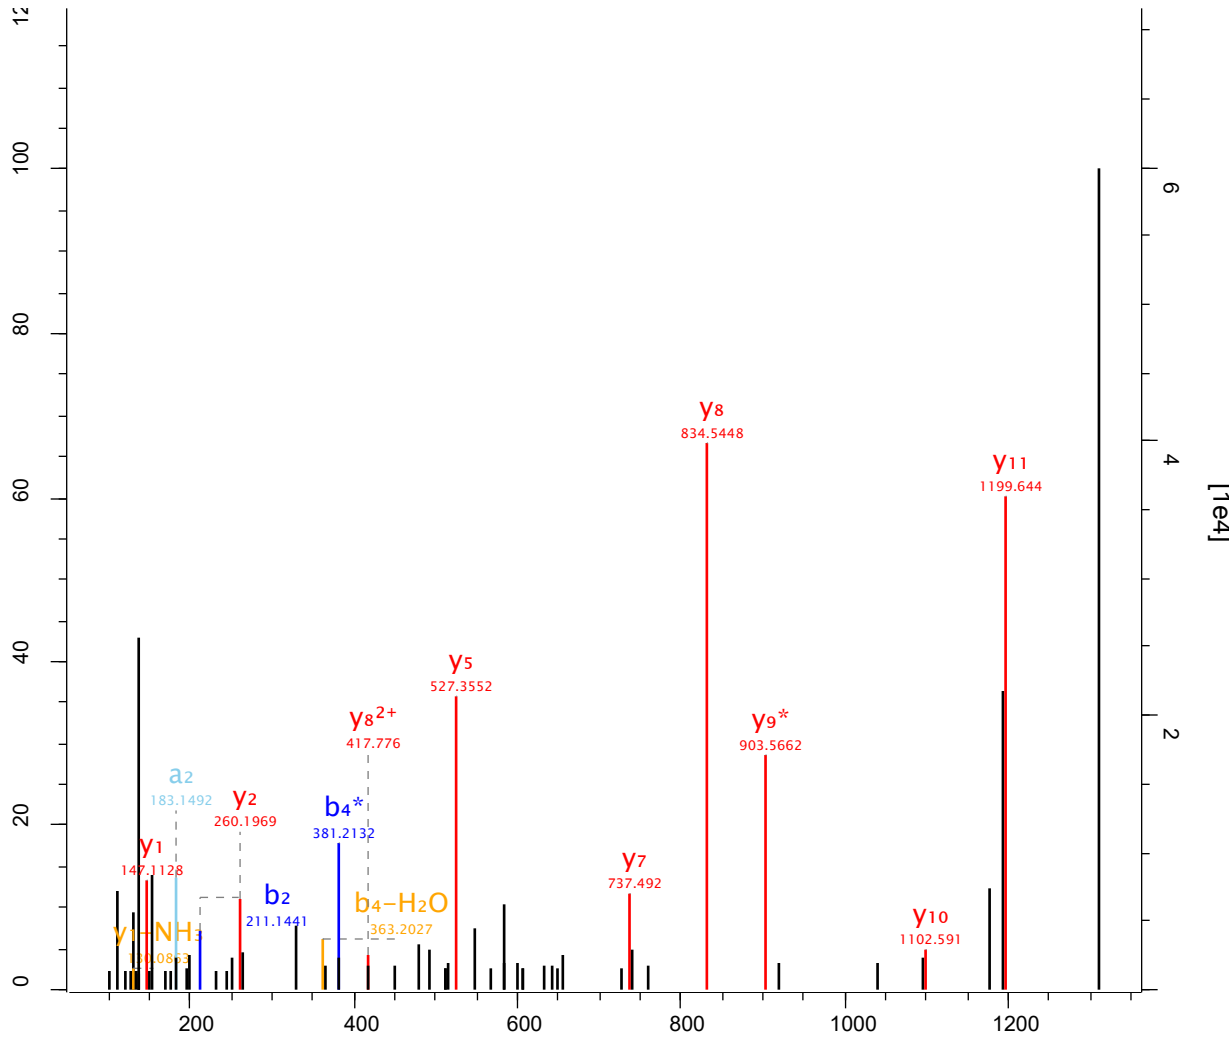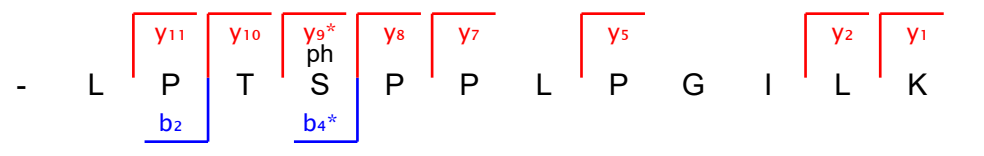



Raw file Scan Method Score m/z  
 sys\_15\_1 36049 FTMS; HCD 74.78 923.86

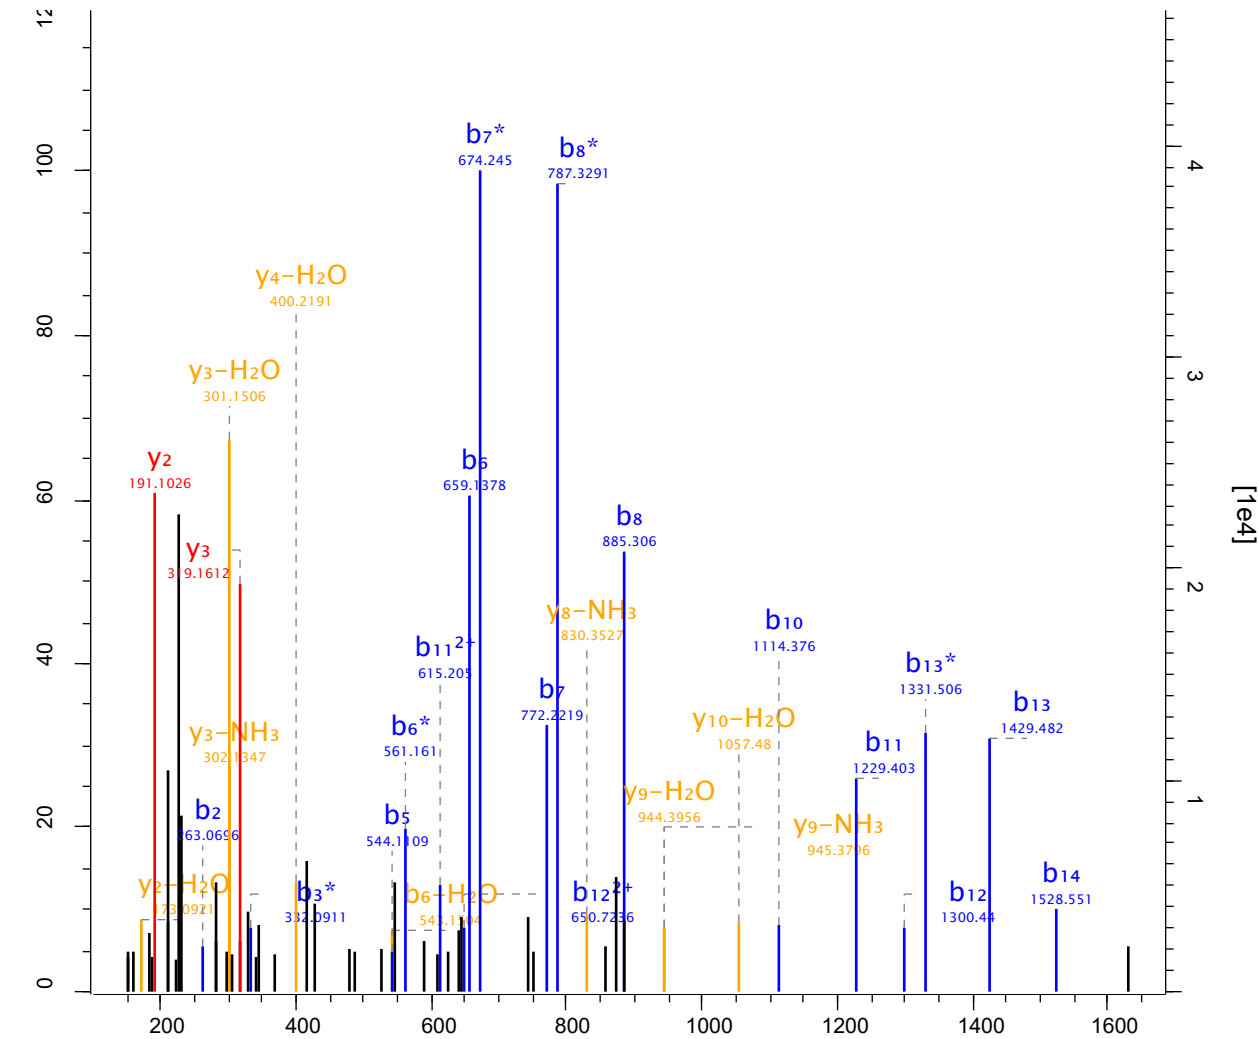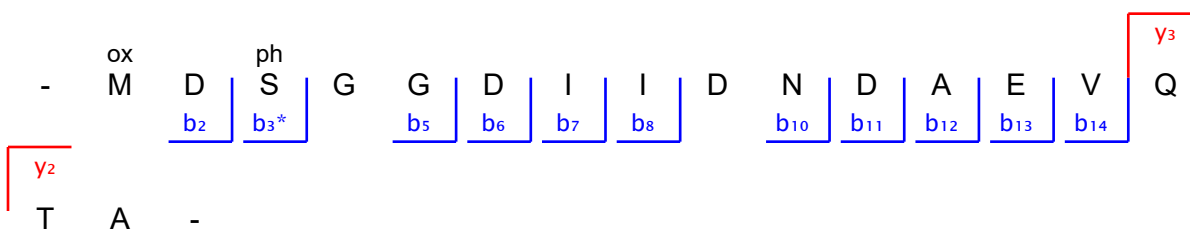

Raw file Scan Method Score m/z  
 sys\_15\_1 36225 FTMS; HCD 50.36 750.65

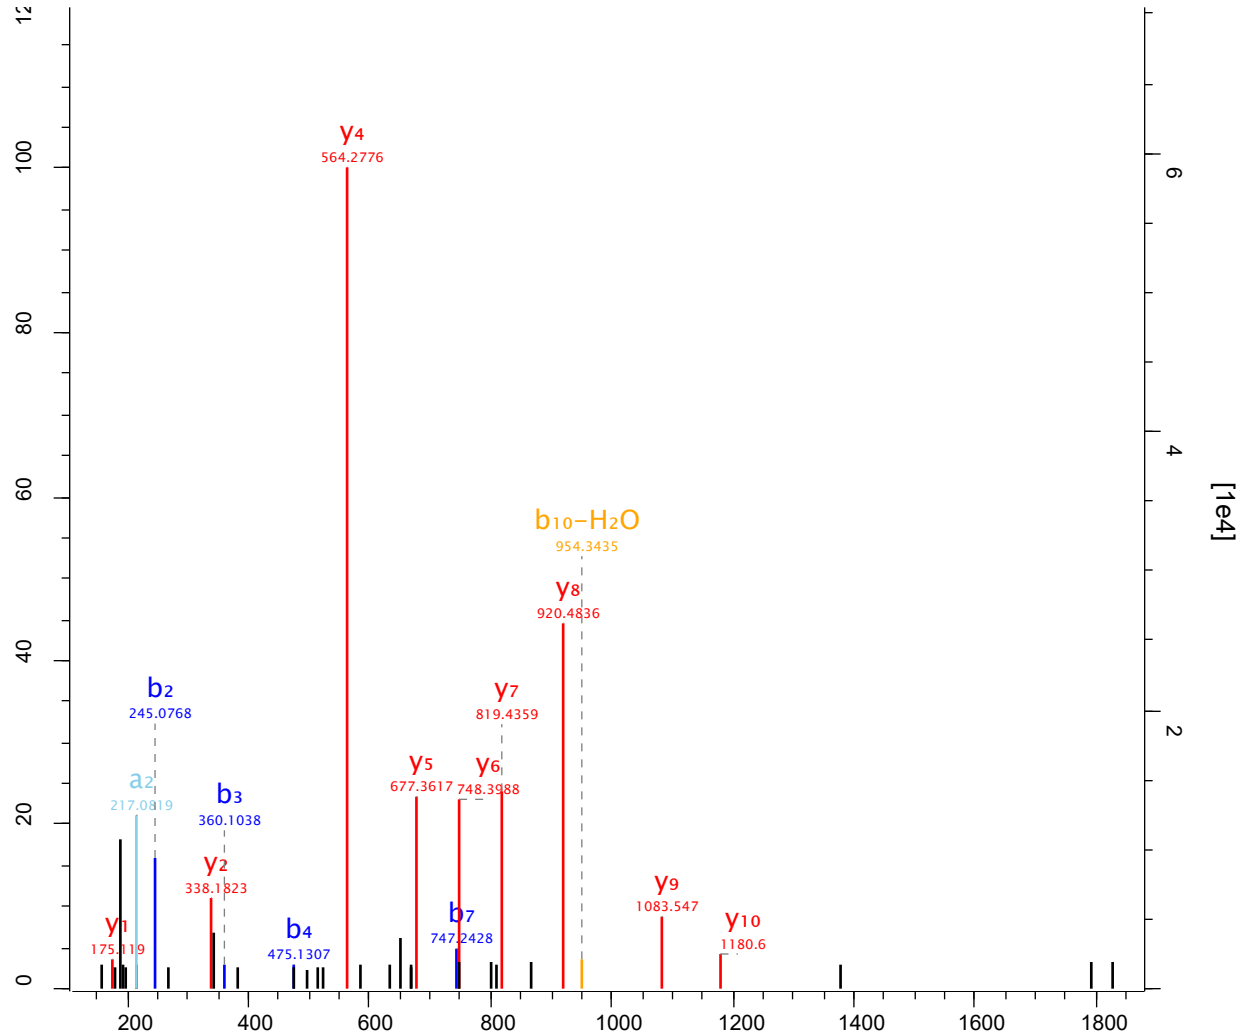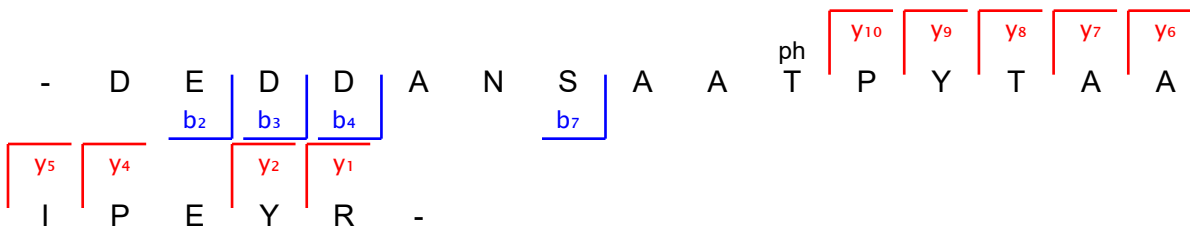

Raw file Scan Method Score m/z  
 sys\_15\_1 36288 FTMS; HCD 79.51 823.06

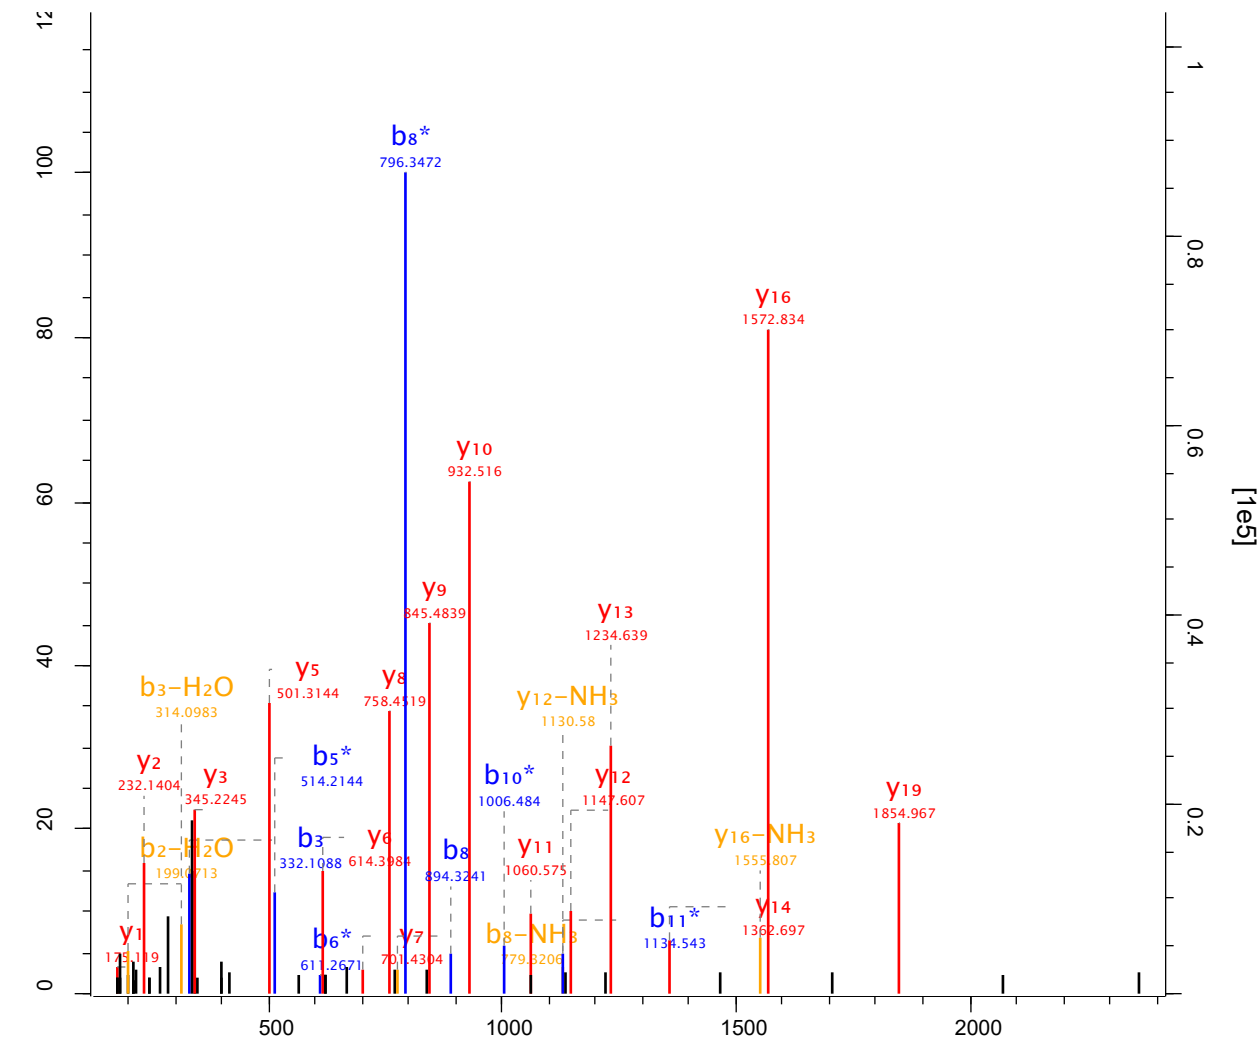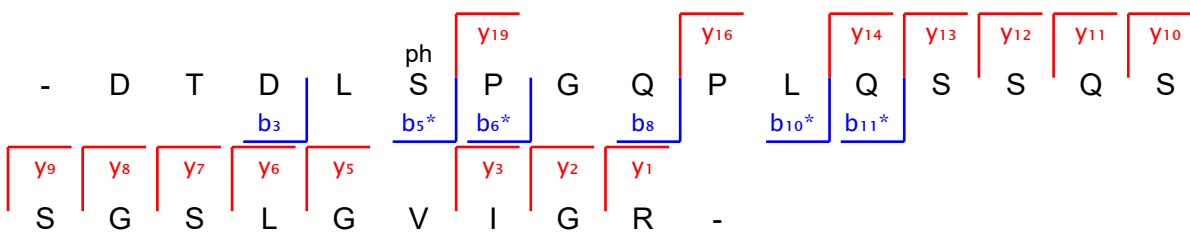

Raw file Scan Method Score m/z  
 sys\_15\_1 36340 FTMS; HCD 144.7 542.76

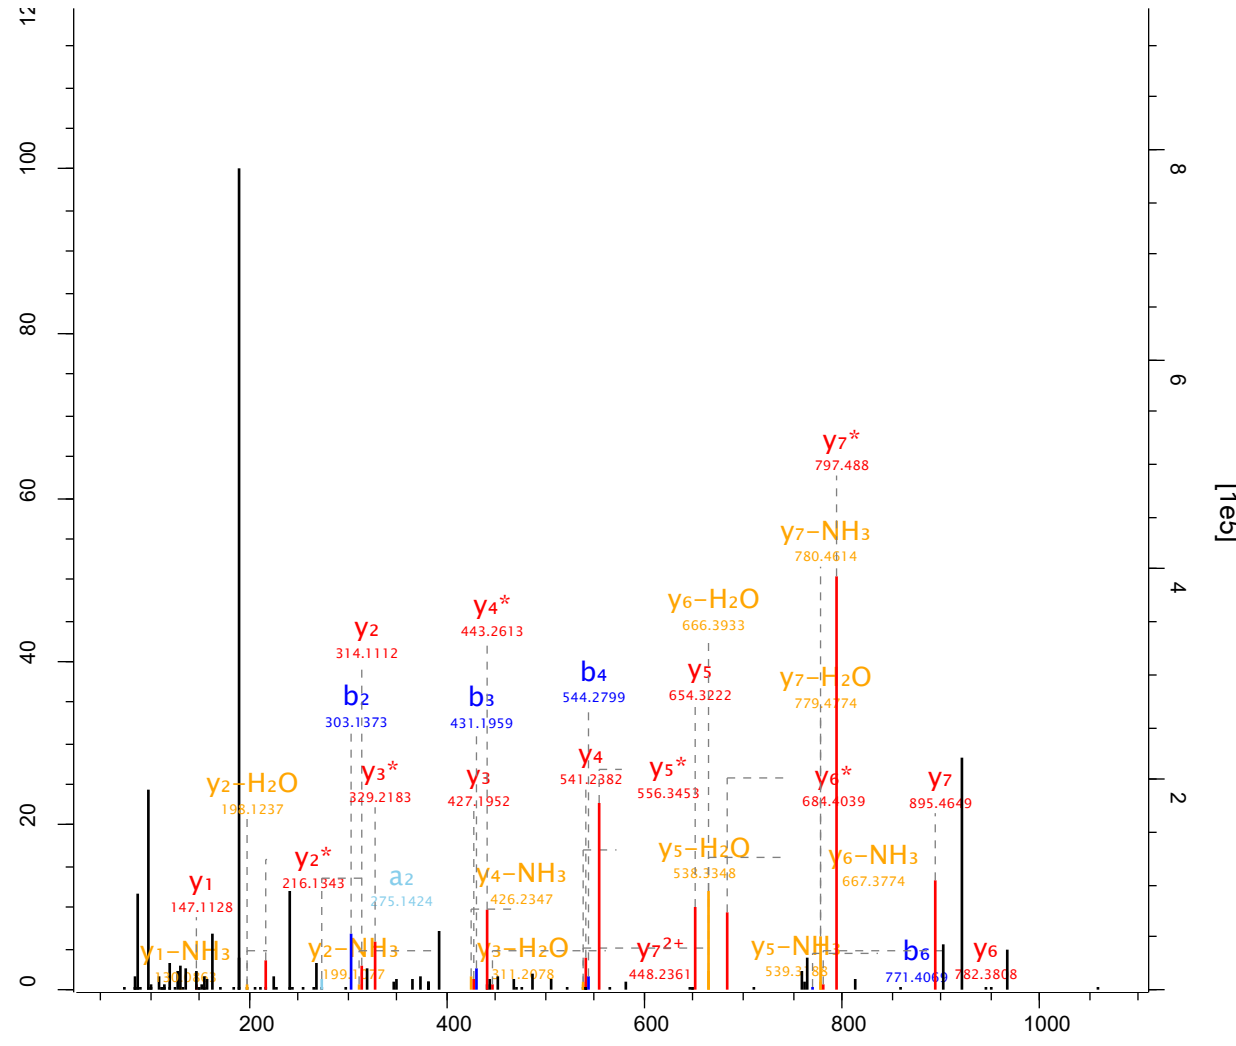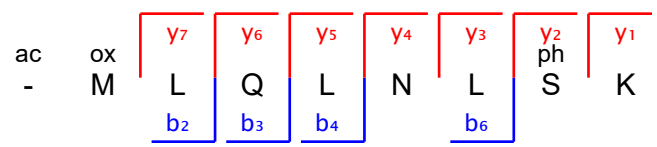

Raw file Scan Method Score m/z  
 sys\_15\_1 36373 FTMS; HCD 55.13 848.4

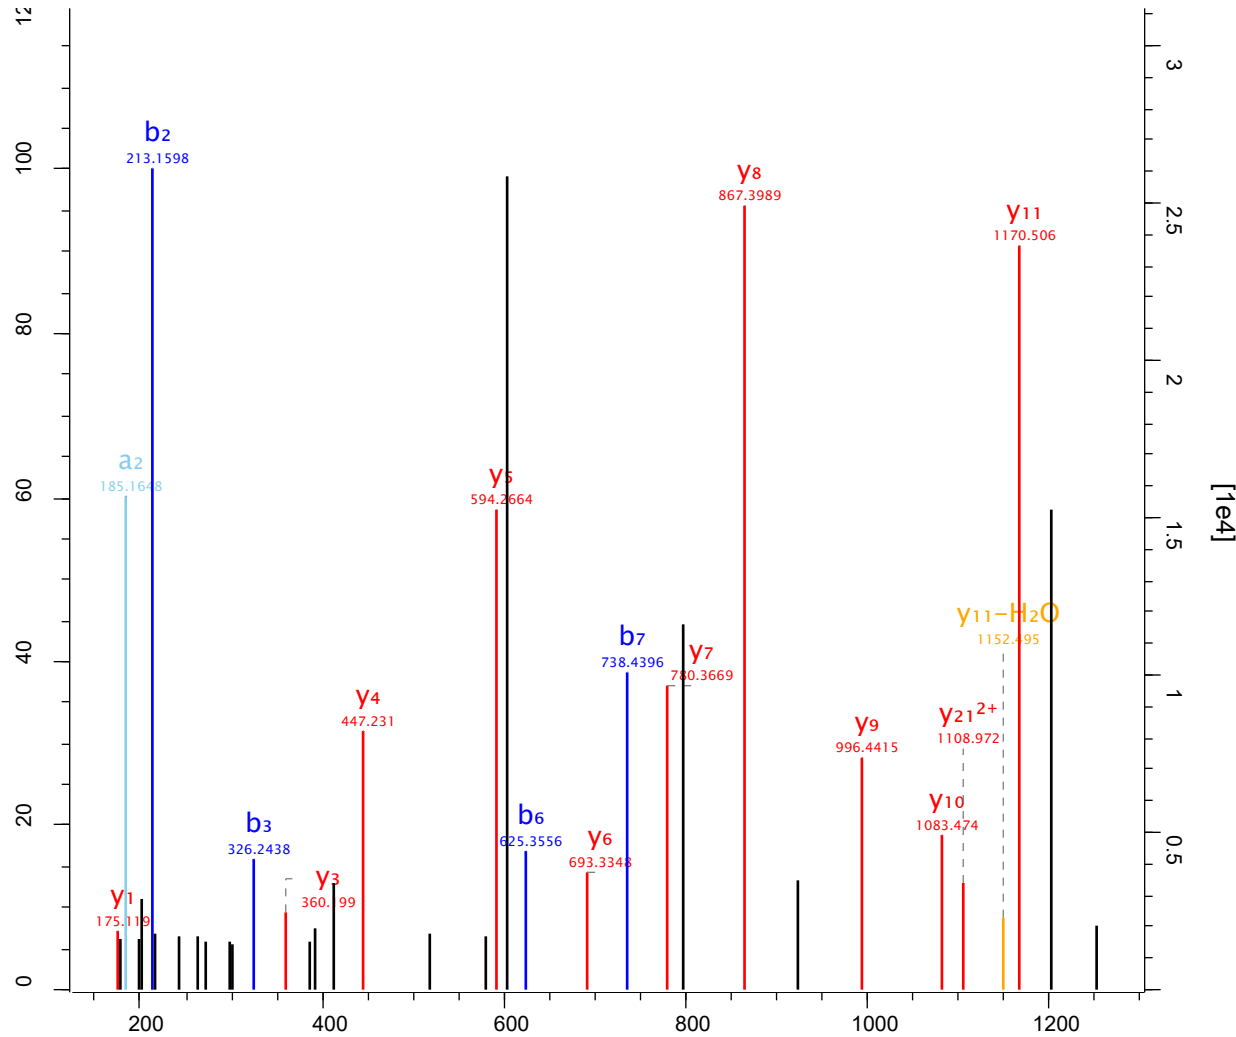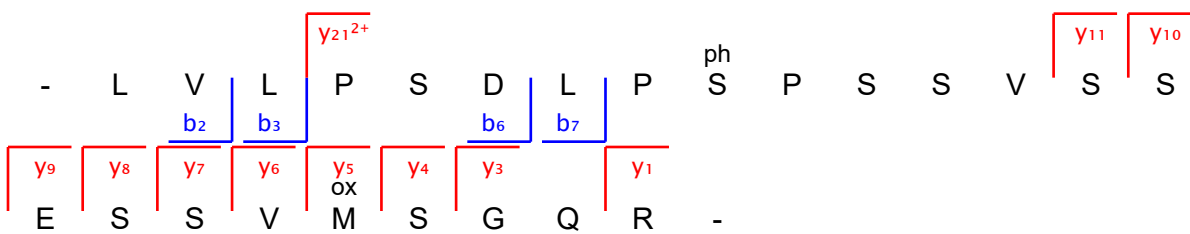

Raw file Scan Method Score m/z  
 sys\_15\_1 3644 FTMS; HCD 115.29 536.73

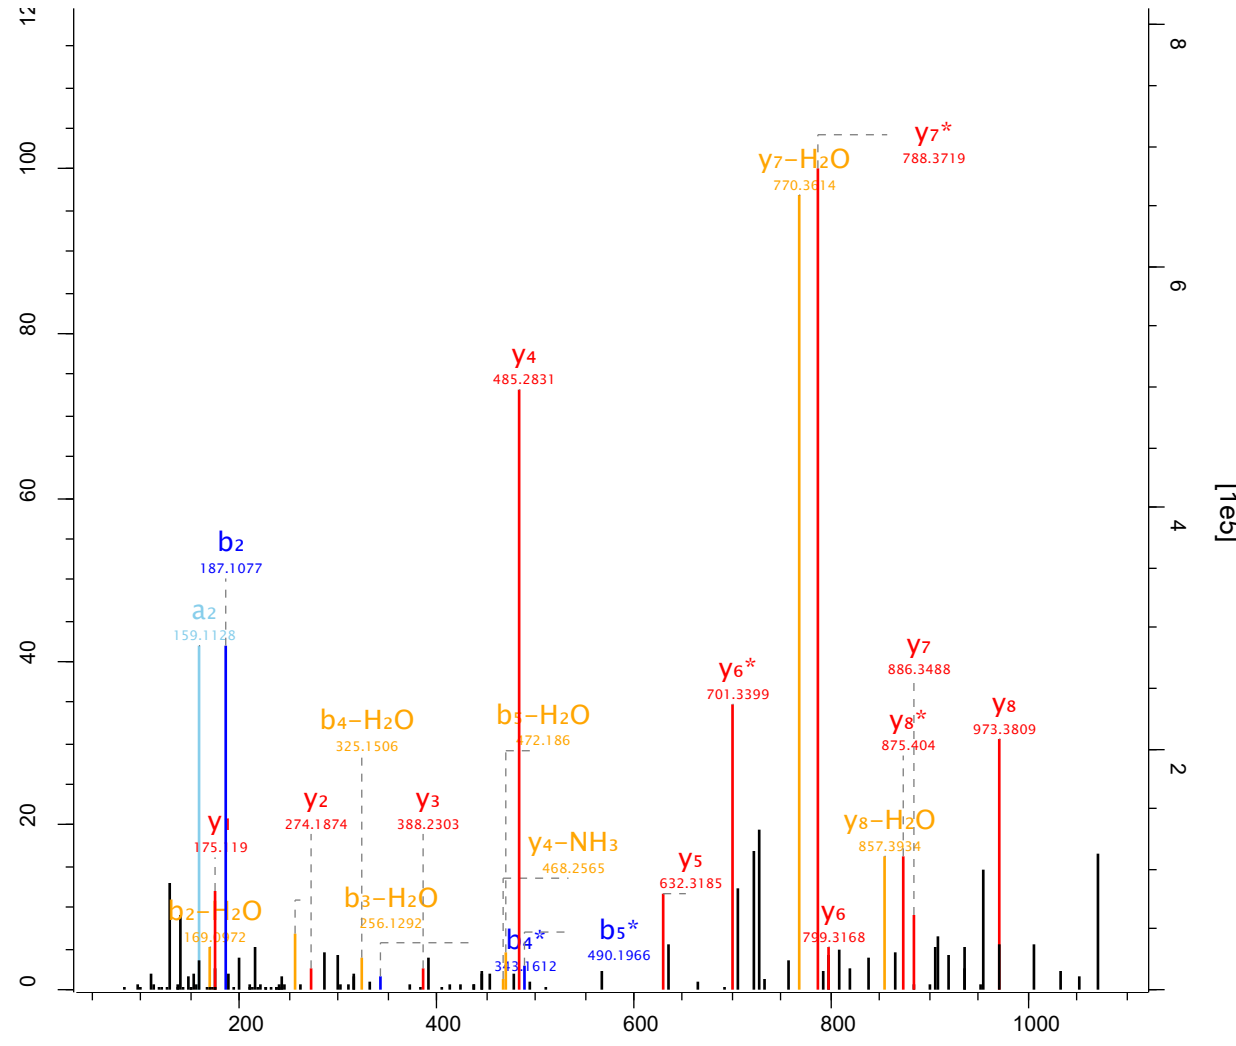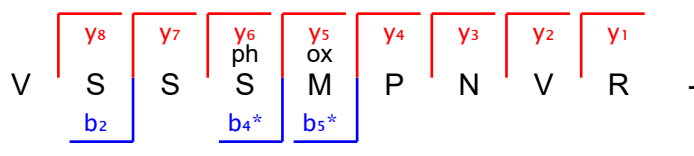

Raw file Scan Method Score m/z  
 sys\_15\_1 36442 FTMS; HCD 55.59 956.45

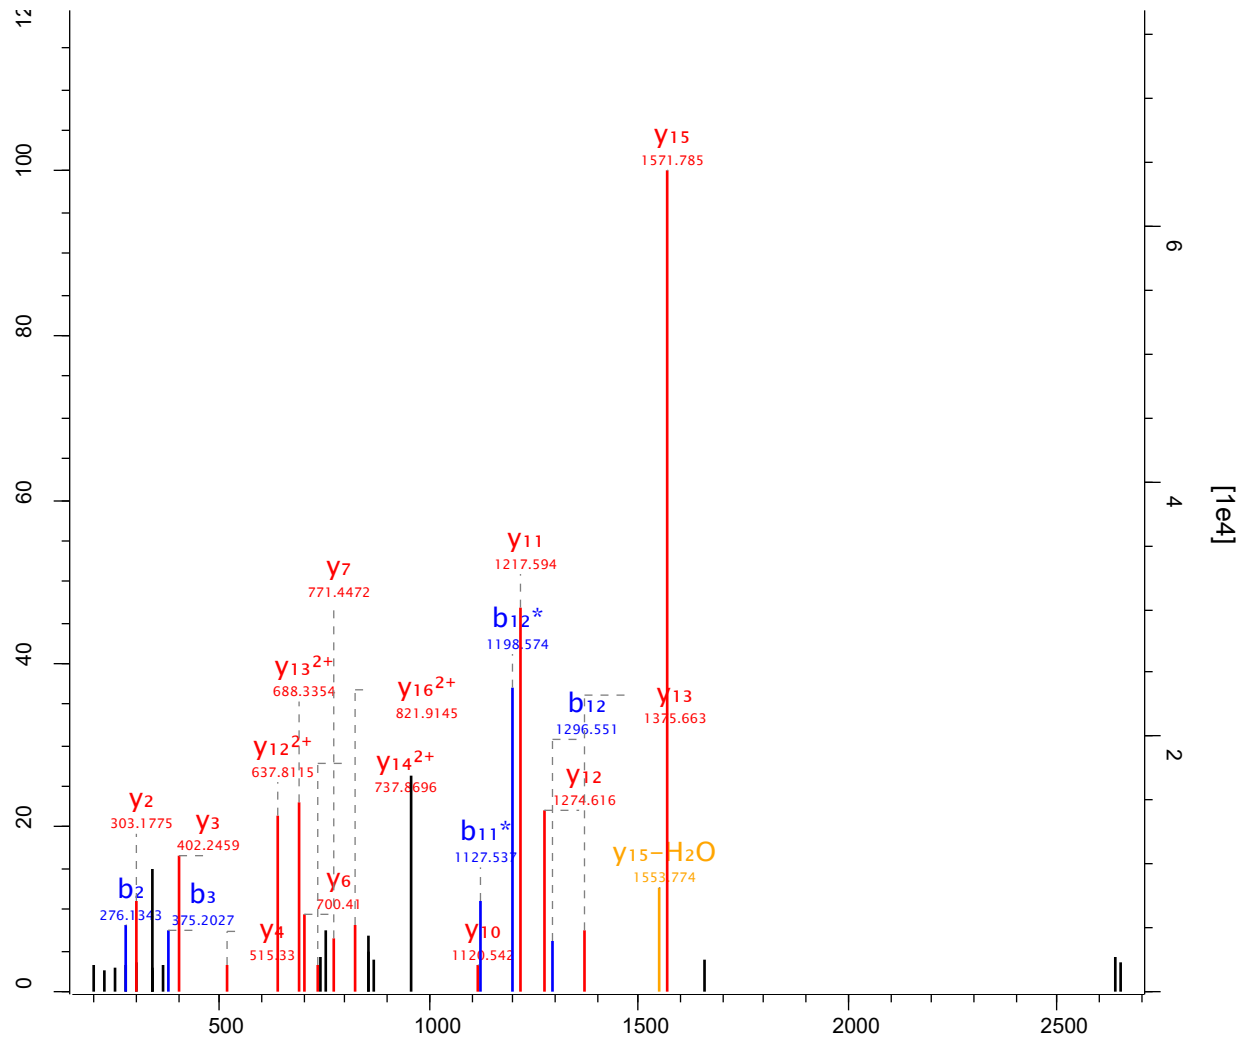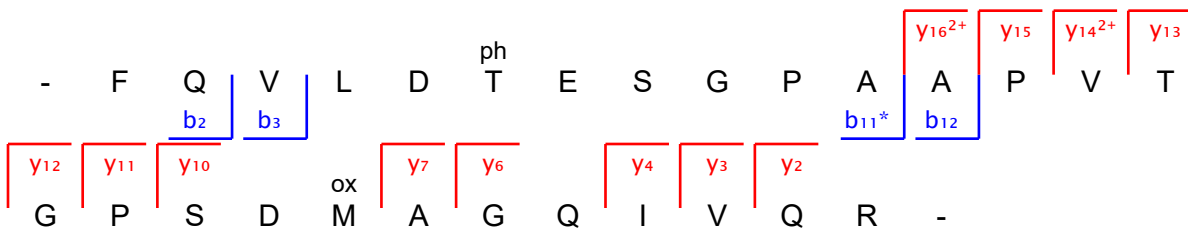

Raw file Scan Method Score m/z  
 sys\_15\_1 36610 FTMS; HCD 102.65 722.82

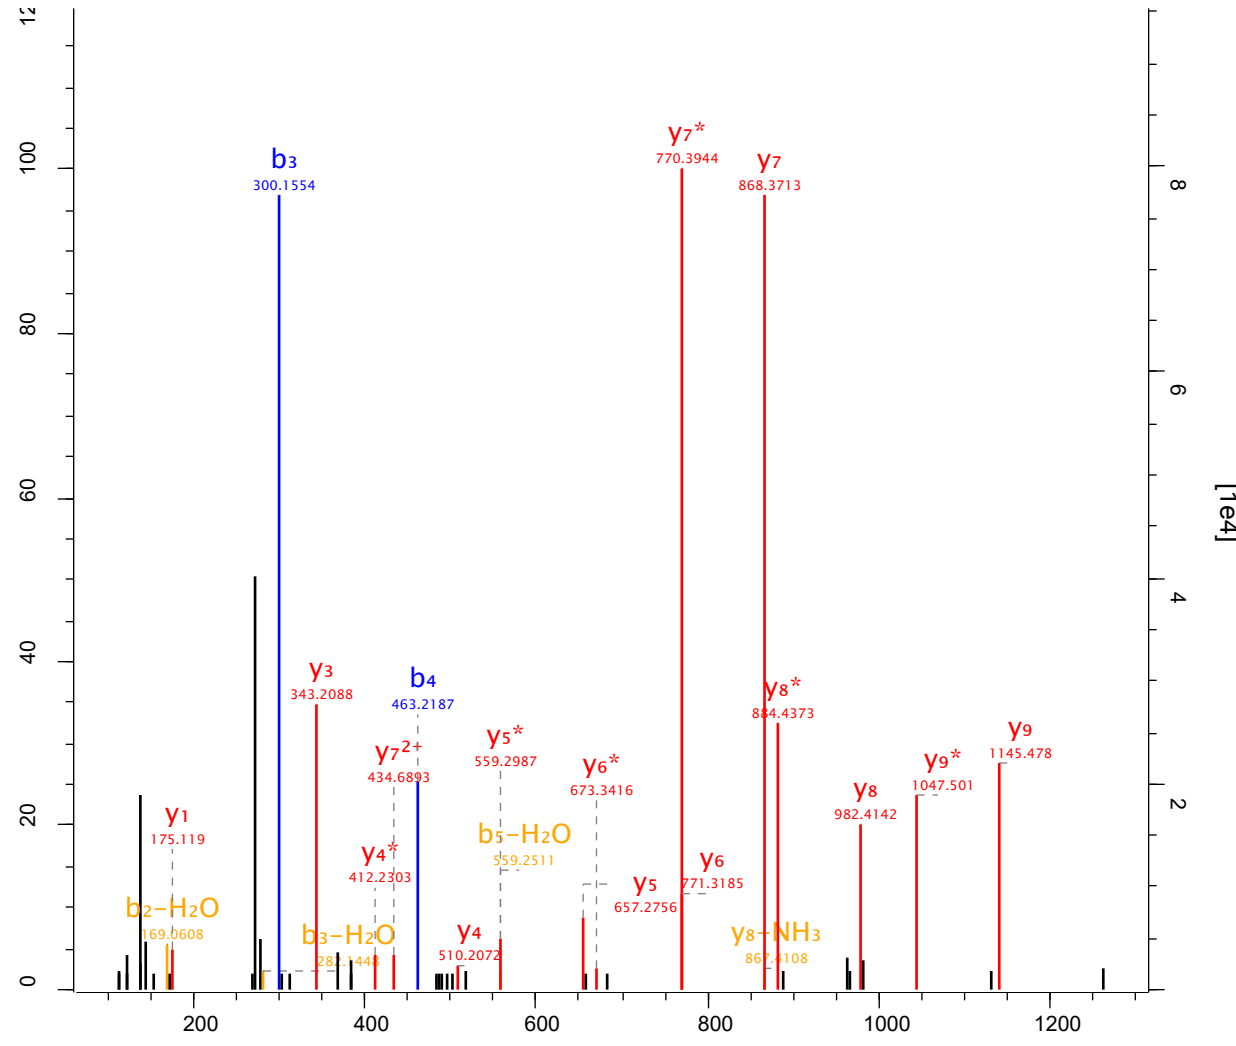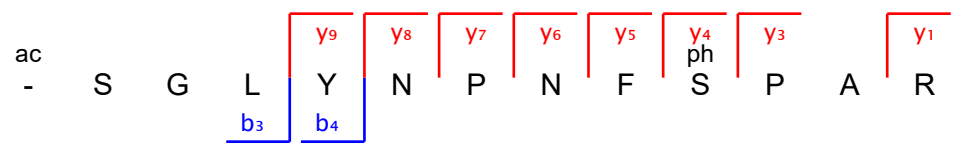



Raw file Scan Method Score m/z  
 sys\_15\_1 3663 FTMS; HCD 76.36 583.75

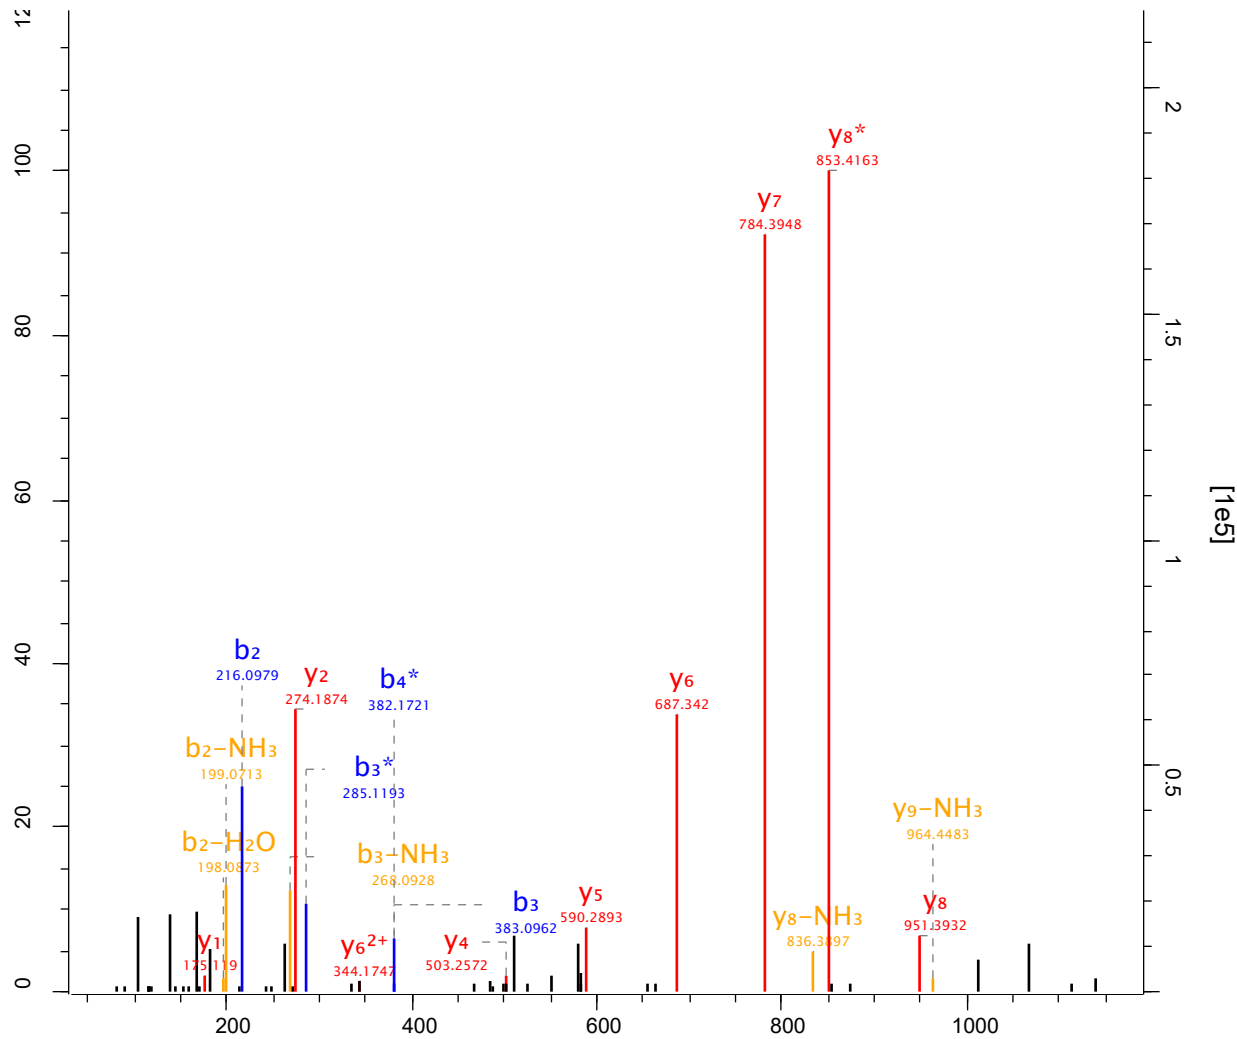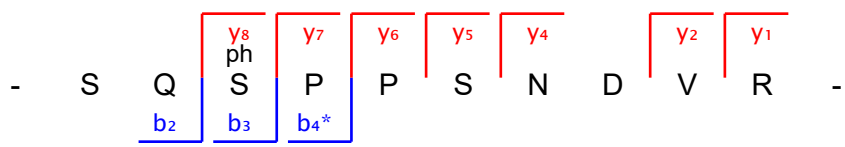

Raw file Scan Method Score m/z  
 sys\_15\_1 36782 FTMS; HCD 85.36 778.89

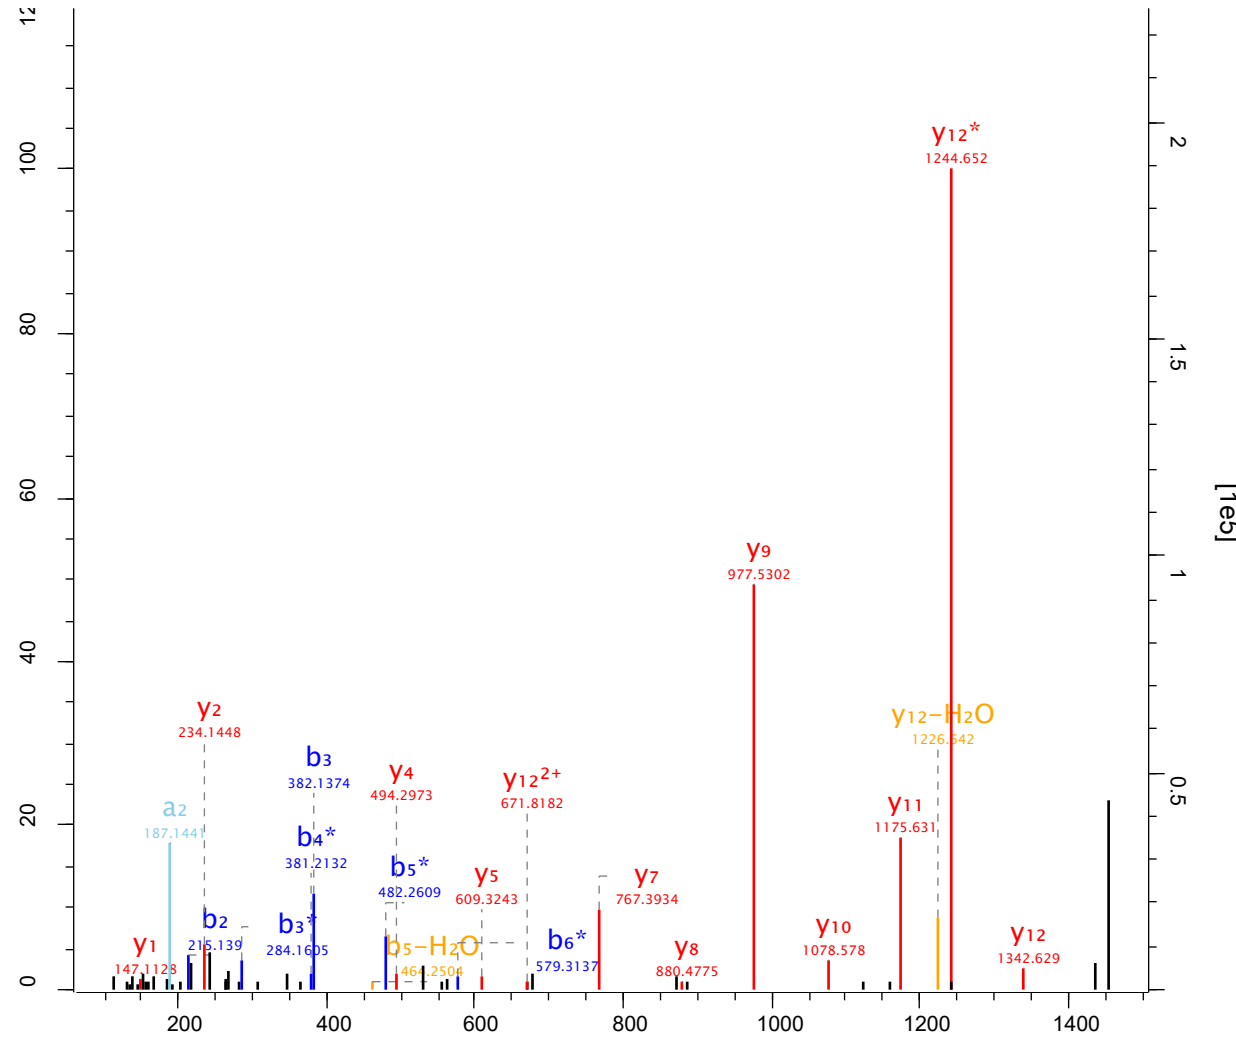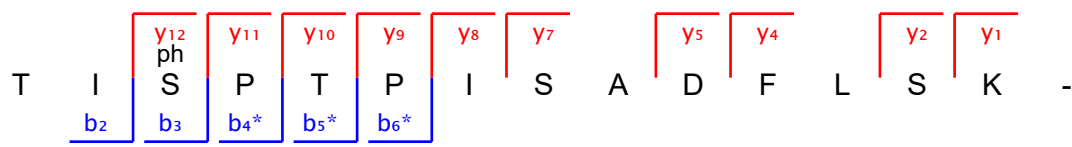

Raw file Scan Method Score m/z  
 sys\_15\_1 36785 FTMS; HCD 227.49 889.69

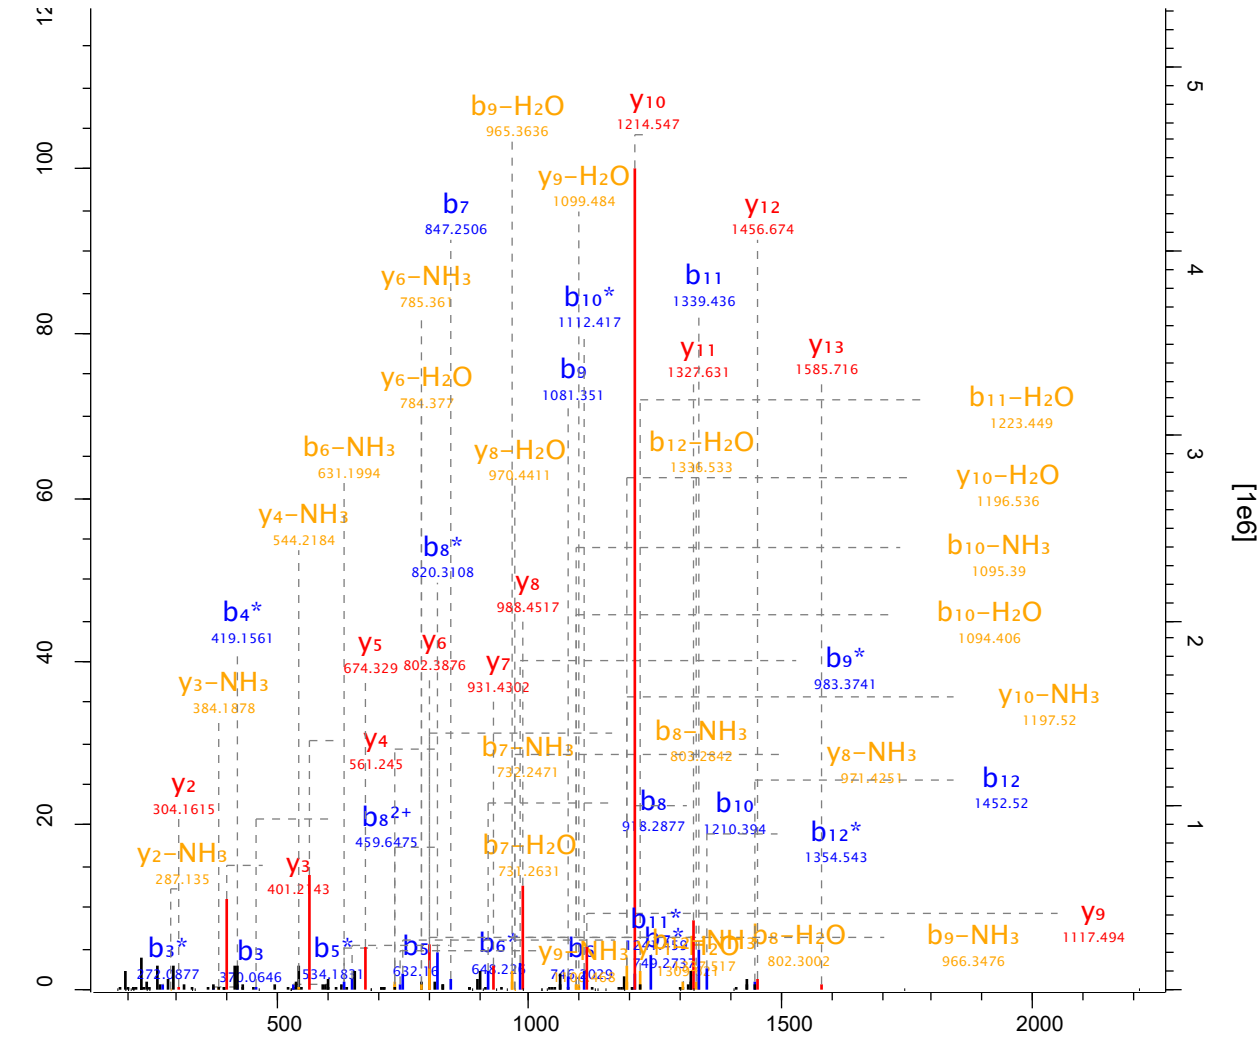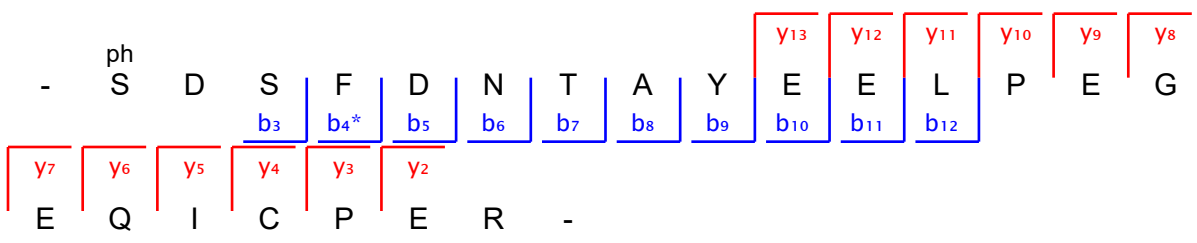

Raw file Scan Method Score m/z  
 sys\_15\_1 36852 FTMS; HCD 104.18 858.39

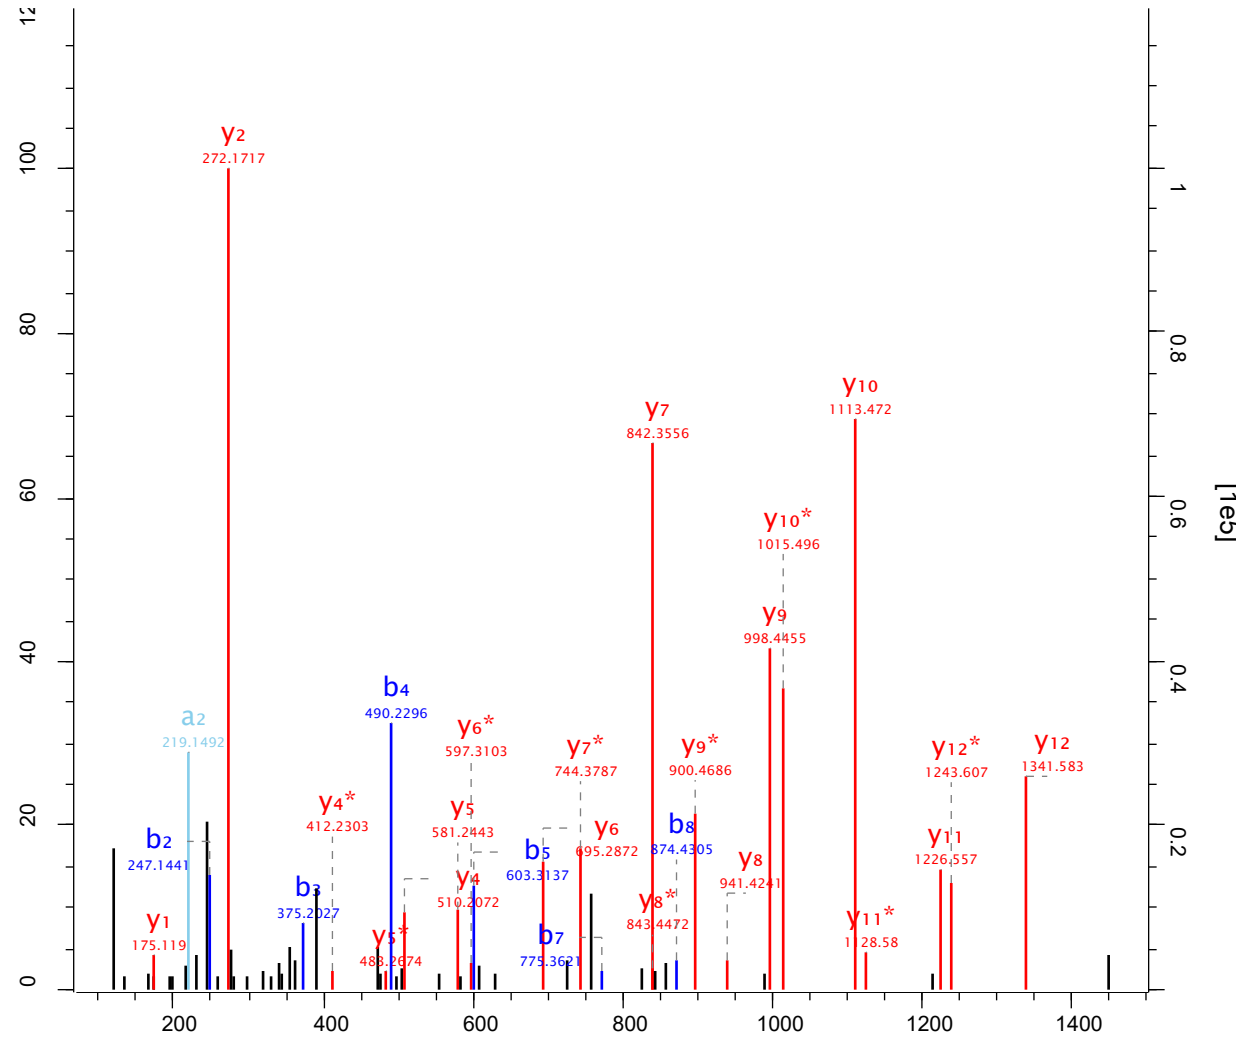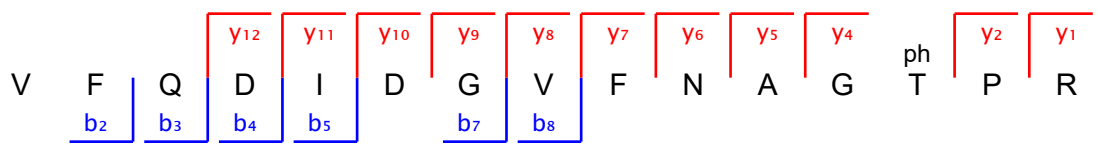

Raw file Scan Method Score m/z  
 sys\_15\_1 36975 FTMS; HCD 137.73 843.4

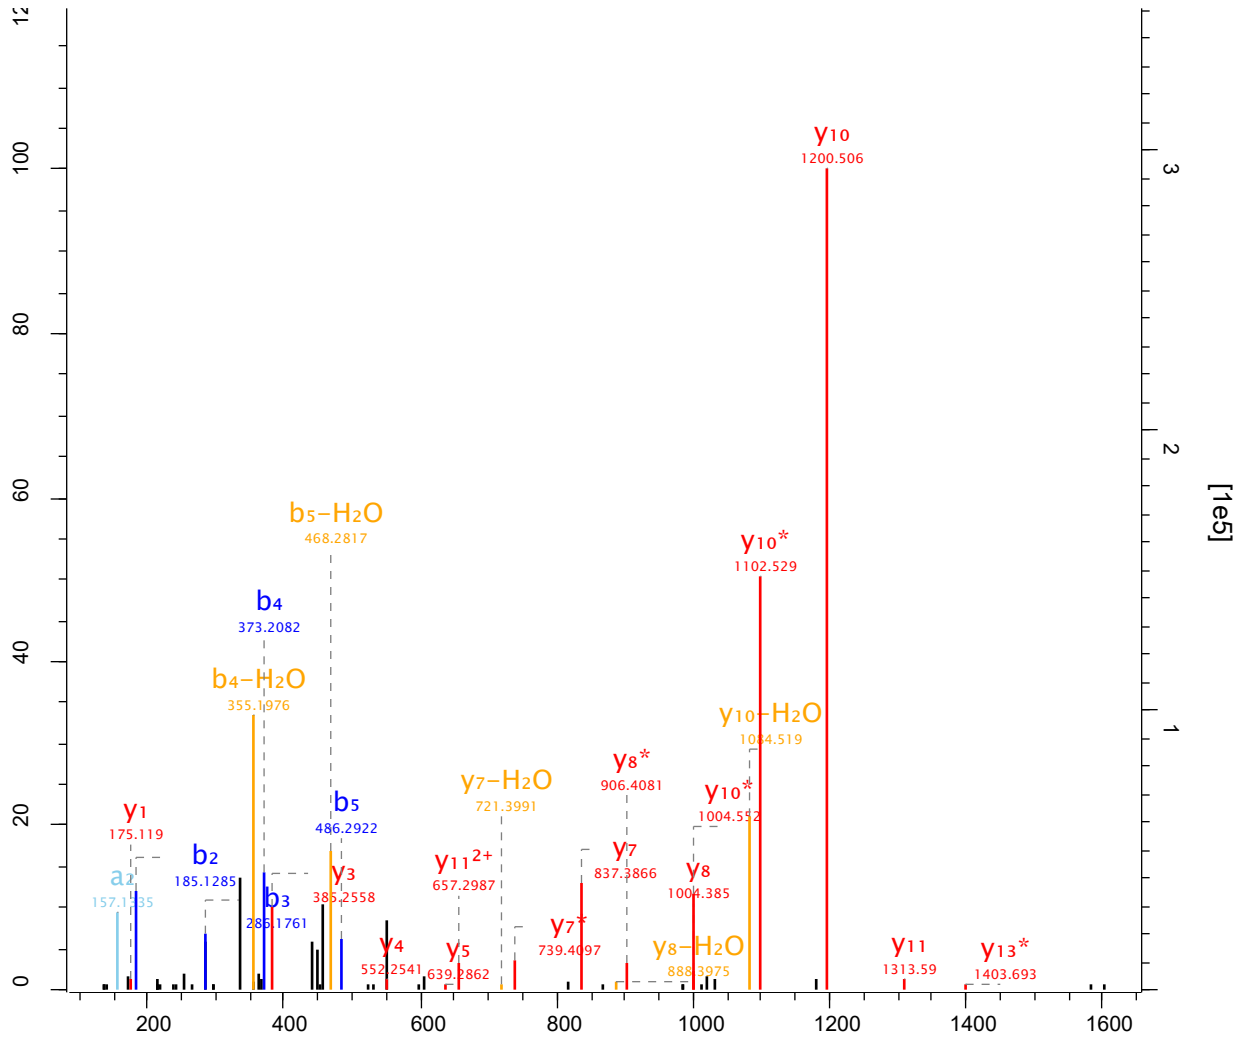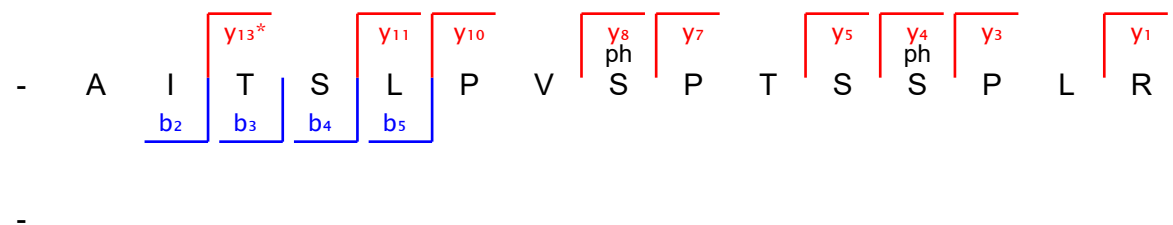

Raw file Scan Method Score m/z  
 sys\_15\_1 3705 FTMS; HCD 50.35 476.72

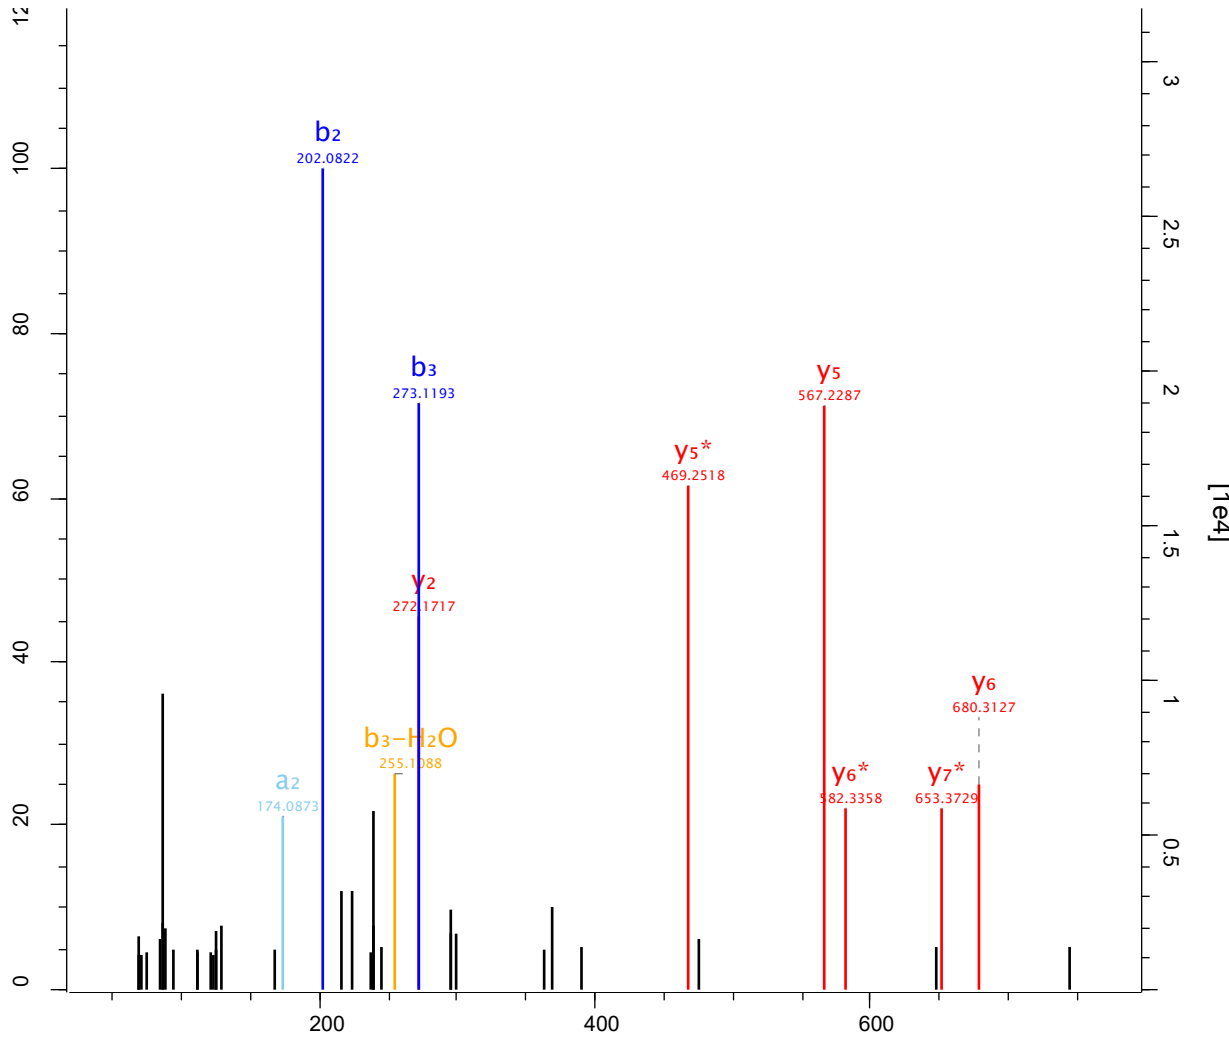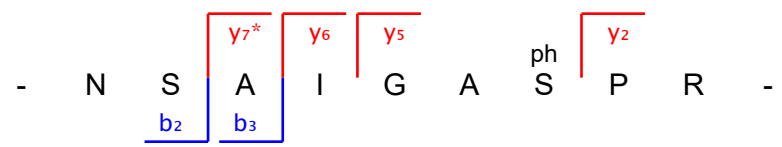

Raw file Scan Method Score m/z  
 sys\_15\_1 37280 FTMS; HCD 141.45 986

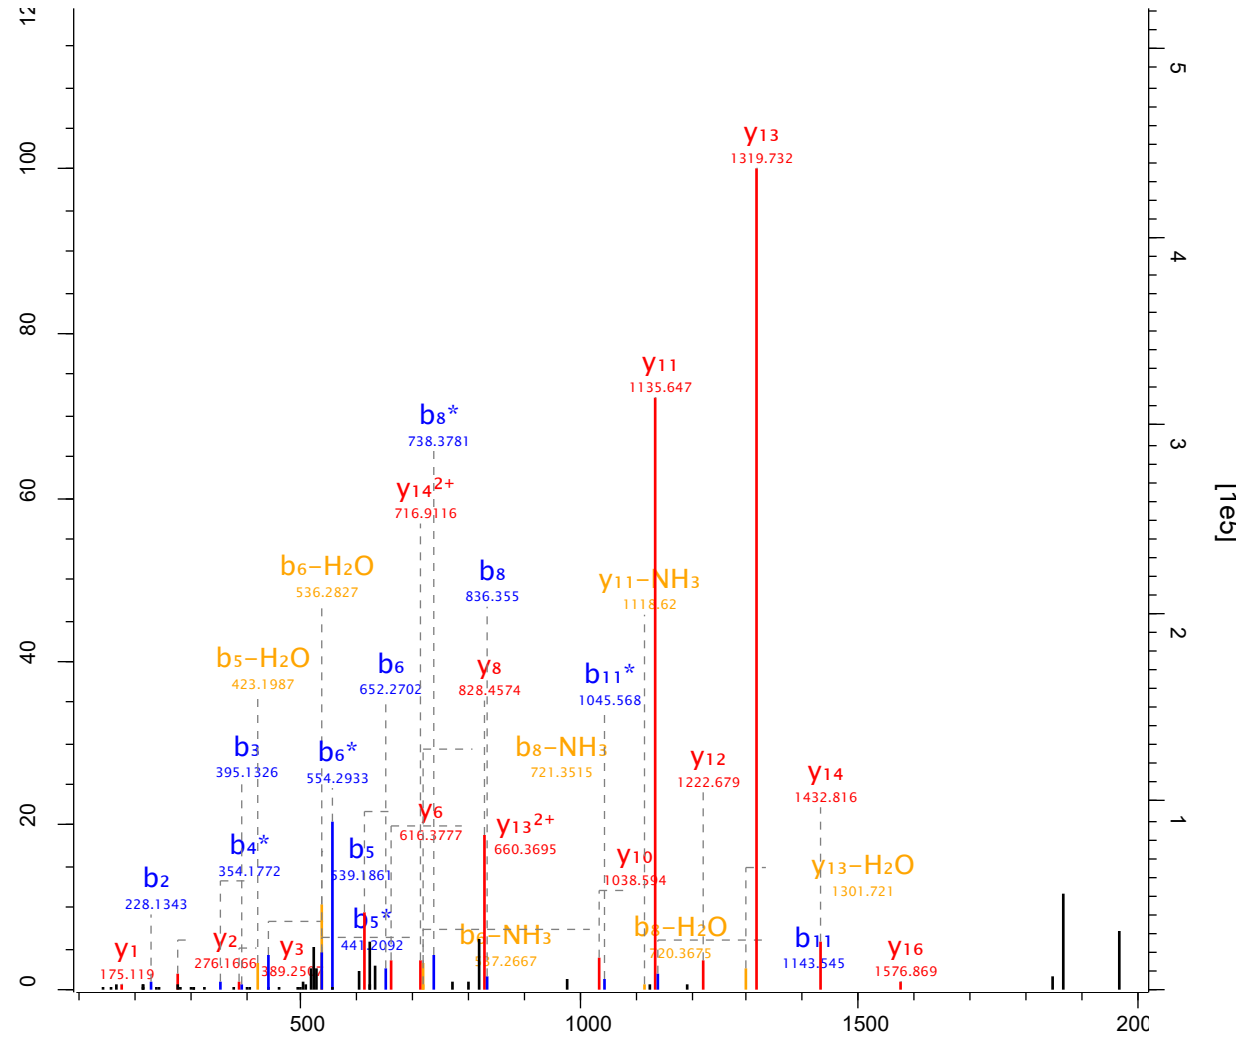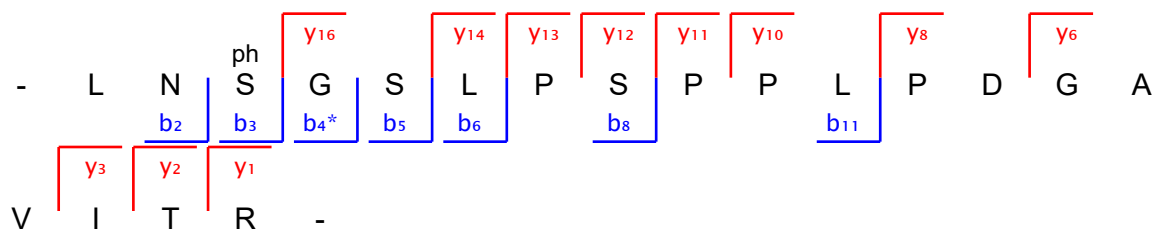

Raw file Scan Method Score m/z  
 sys\_15\_1 37388 FTMS; HCD 171.46 809.36

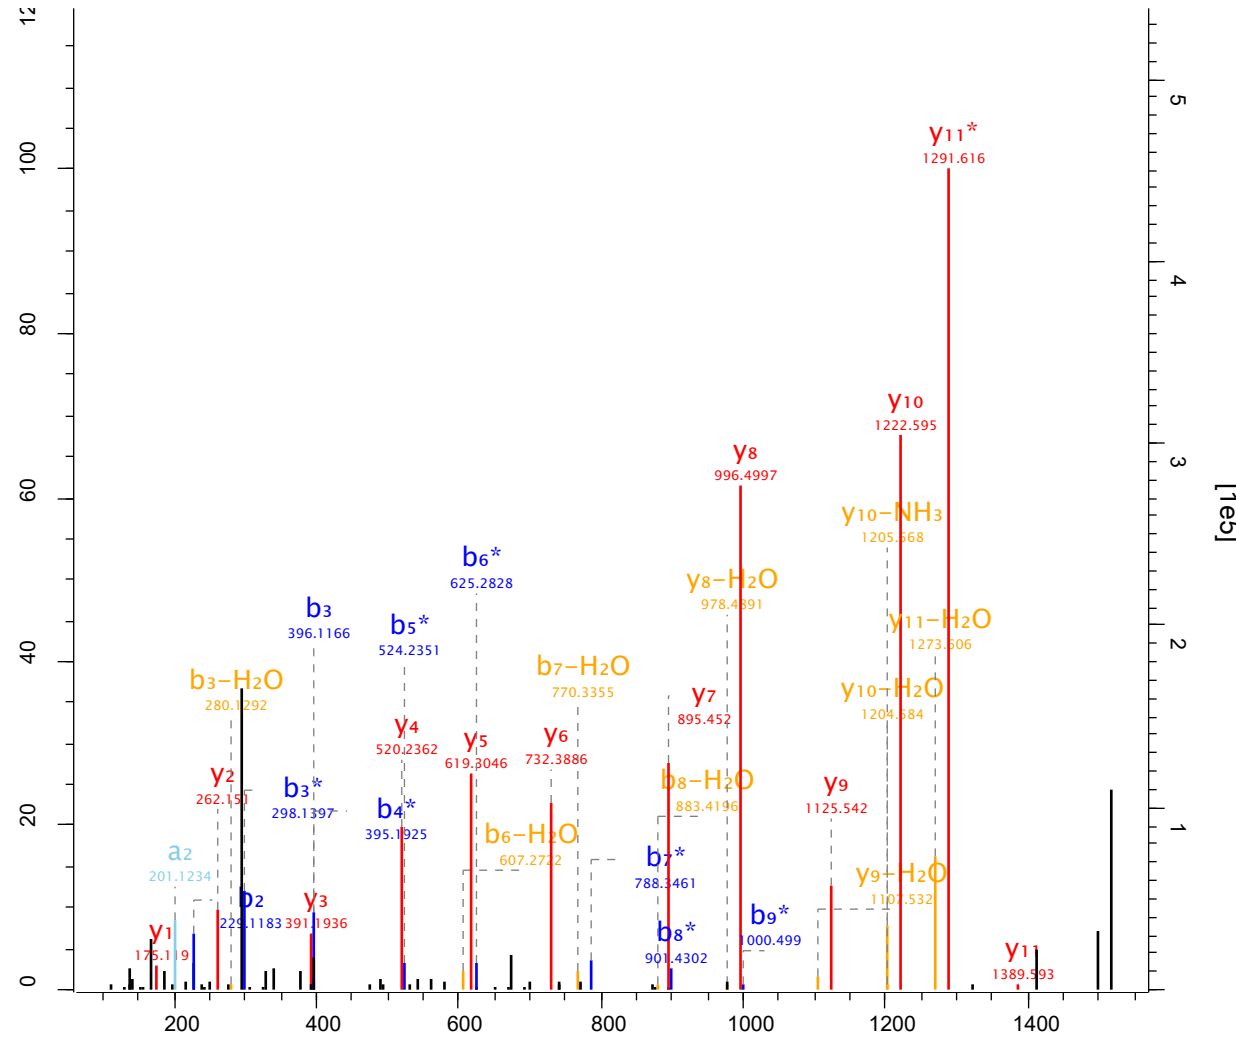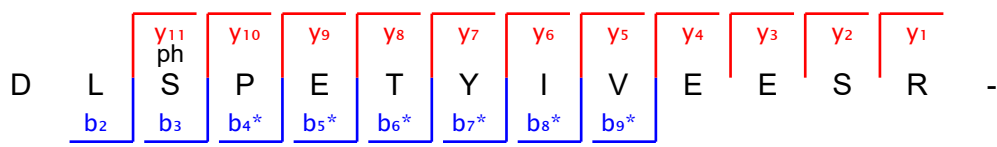



Raw file Scan Method Score m/z  
 sys\_15\_1 37469 FTMS; HCD 129.05 797.89

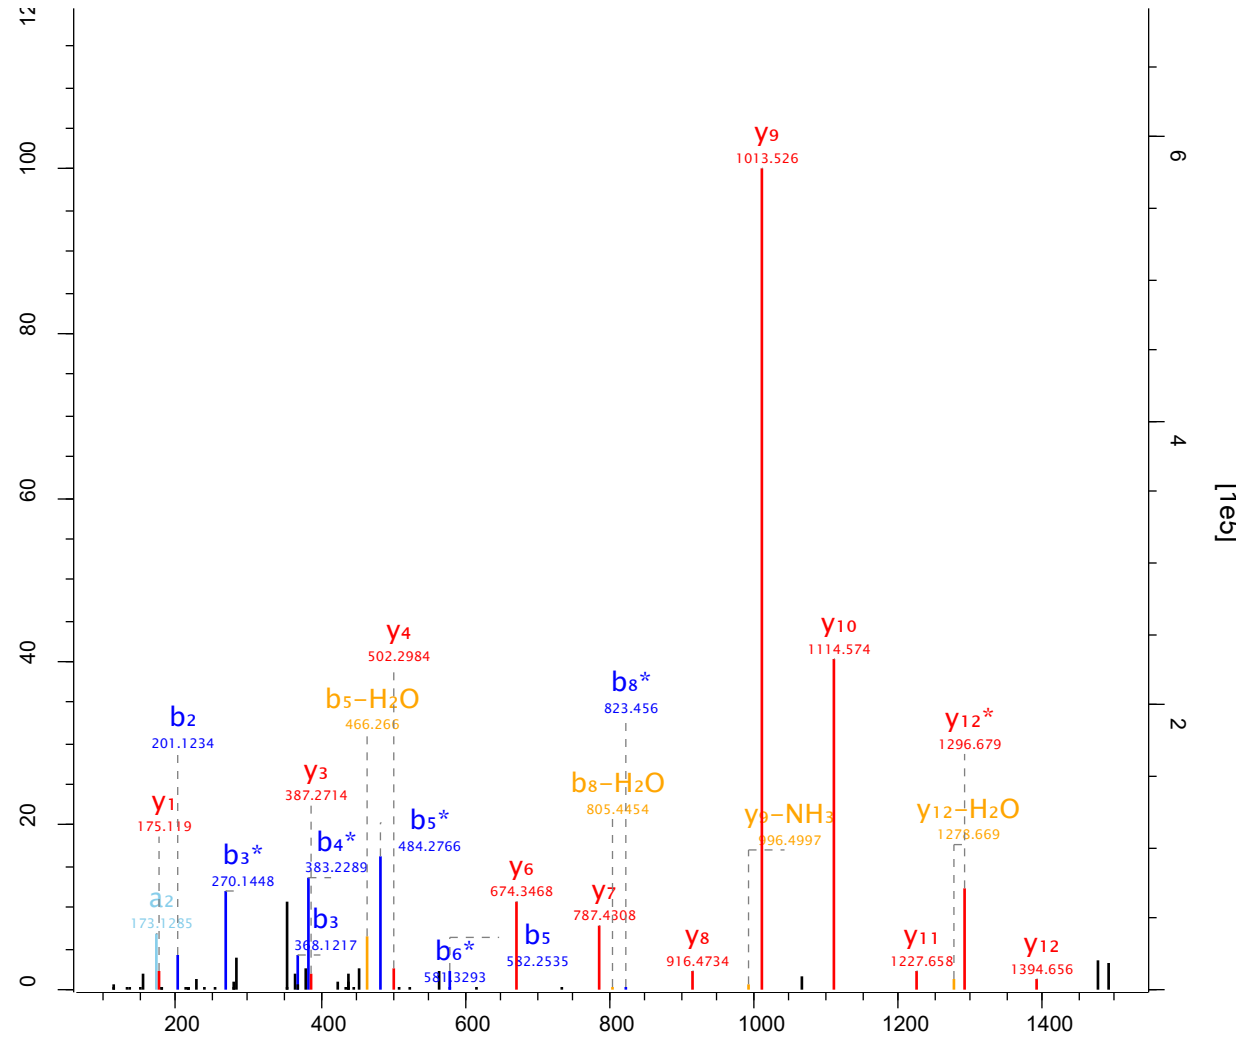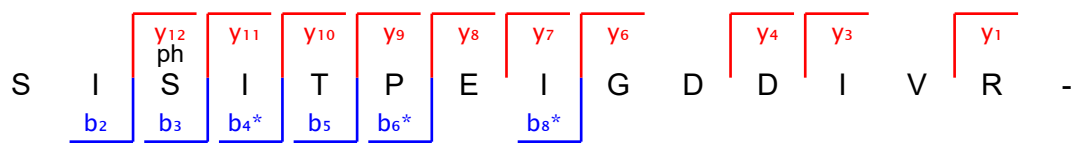

Raw file Scan Method Score m/z  
 sys\_15\_1 37610 FTMS; HCD 106.35 730.31

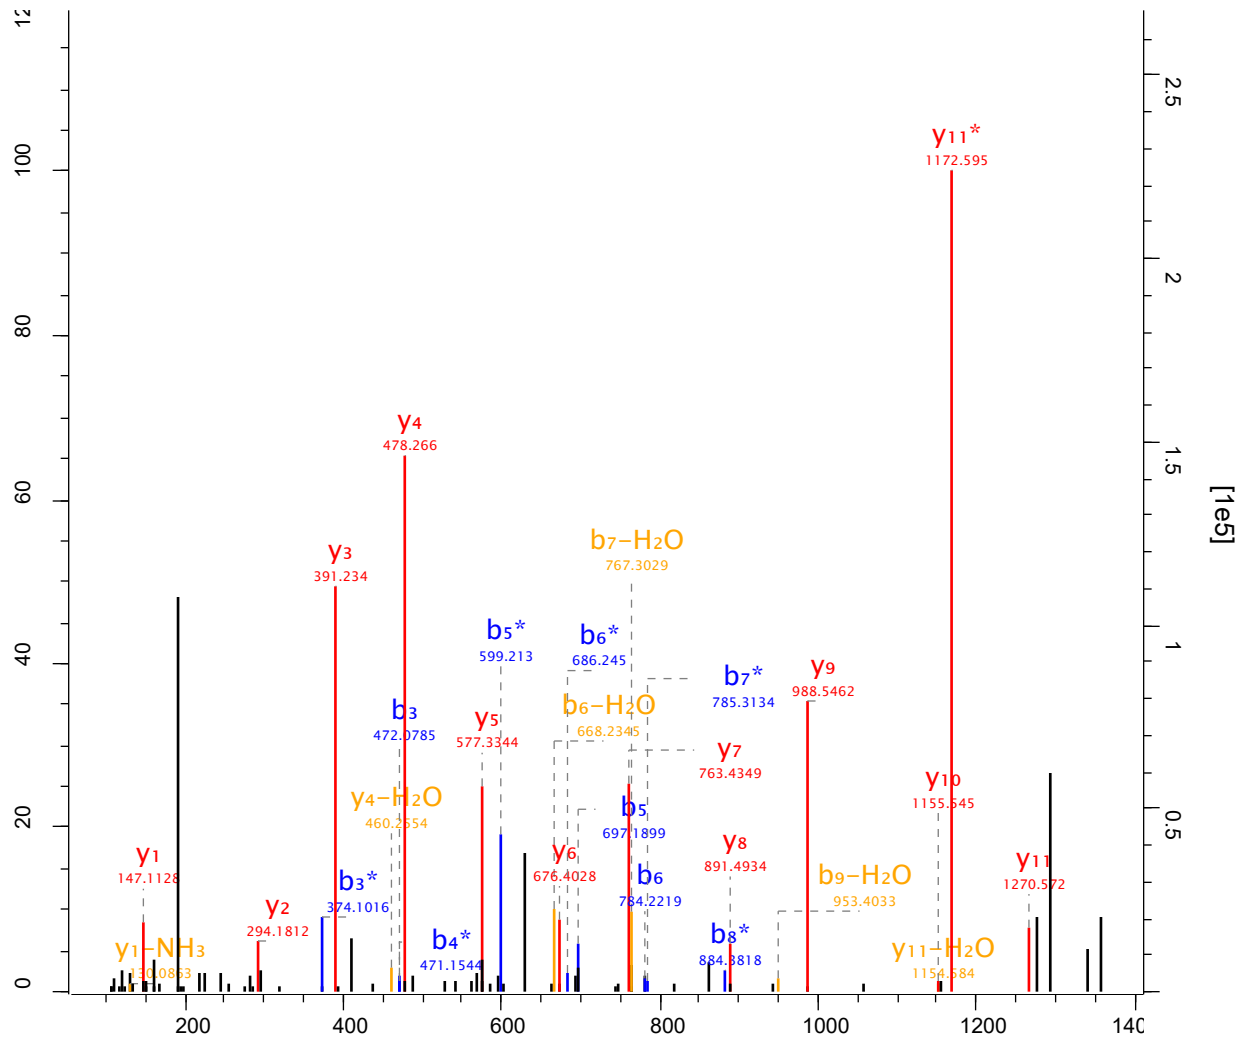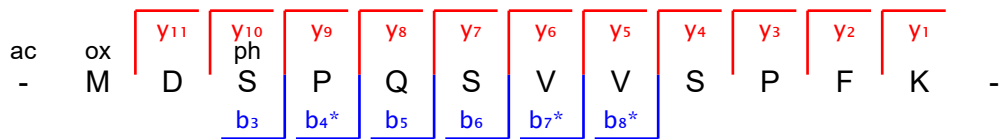

Raw file Scan Method Score m/z  
 sys\_15\_1 3780 FTMS; HCD 107.5 641.79

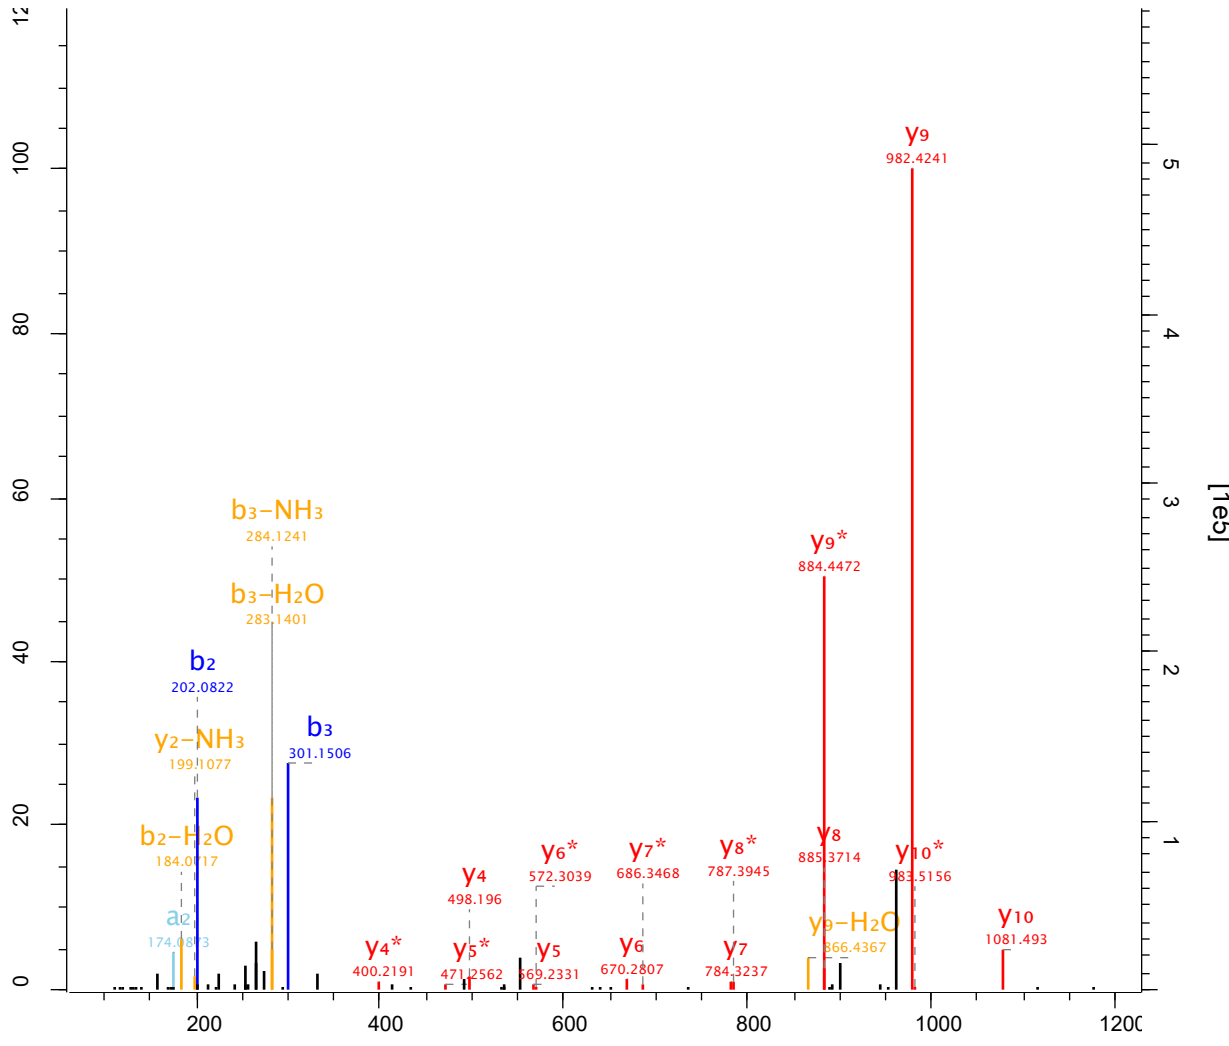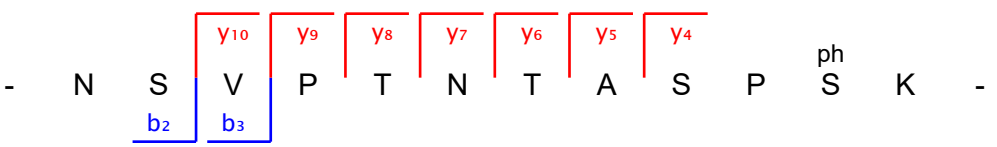

Raw file Scan Method Score m/z  
 sys\_15\_1 37883 FTMS; HCD 95.2 958.93

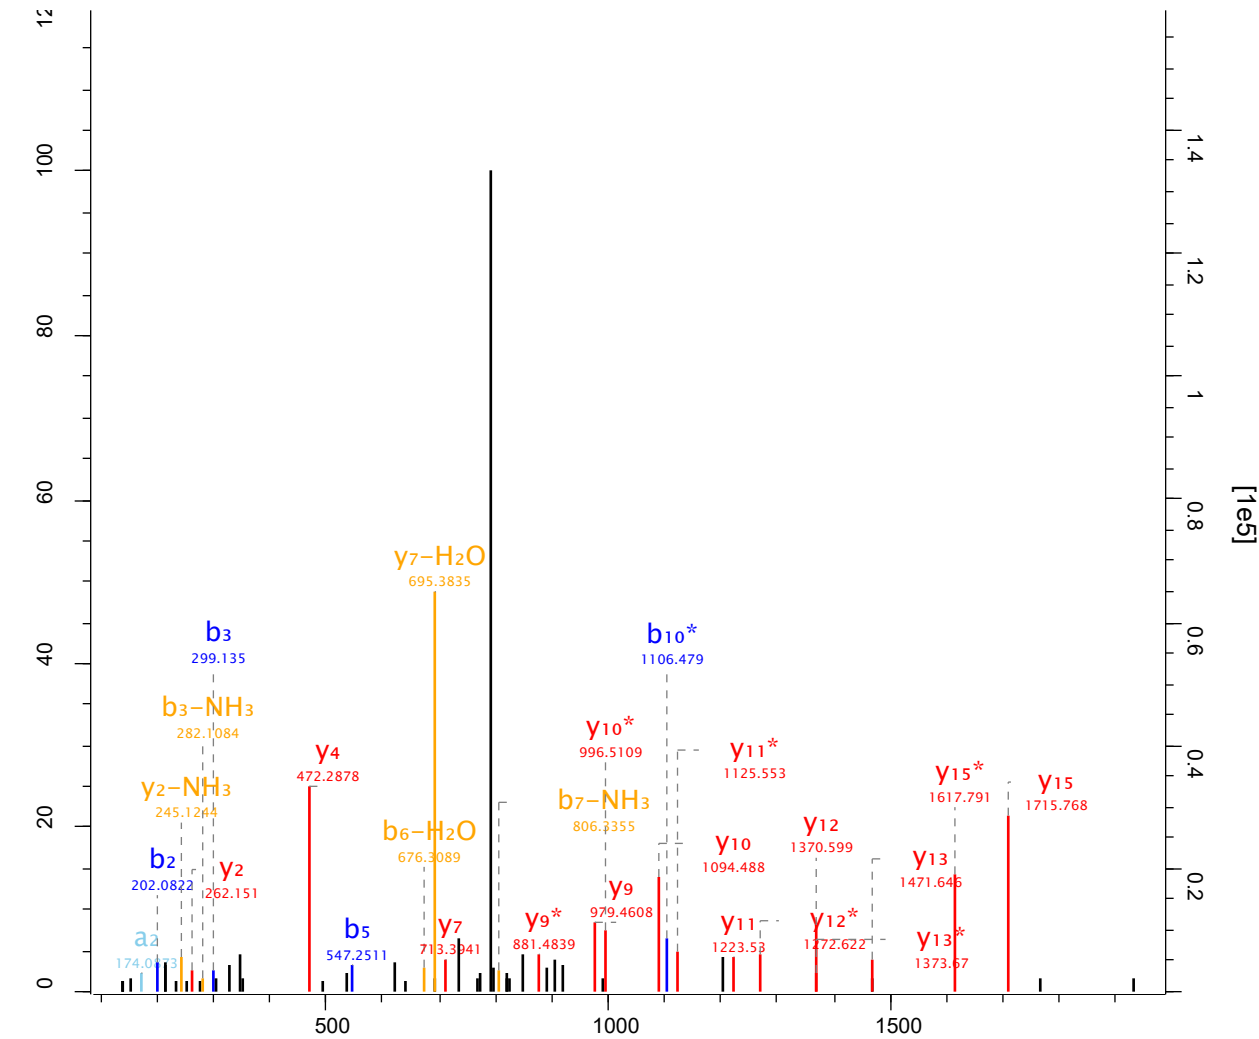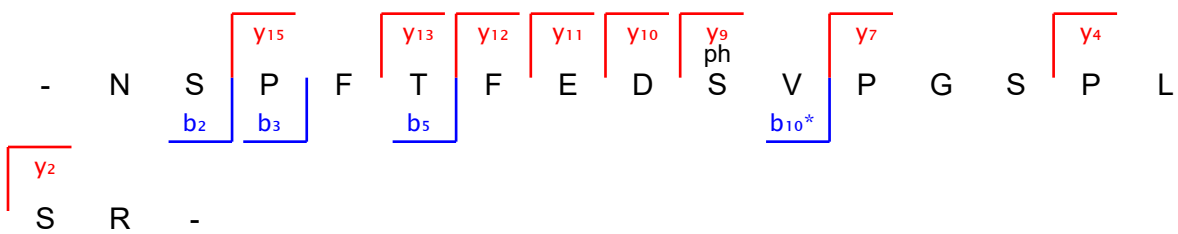

Raw file Scan Method Score m/z  
 sys\_15\_1 38118 FTMS; HCD 142.26 876.84

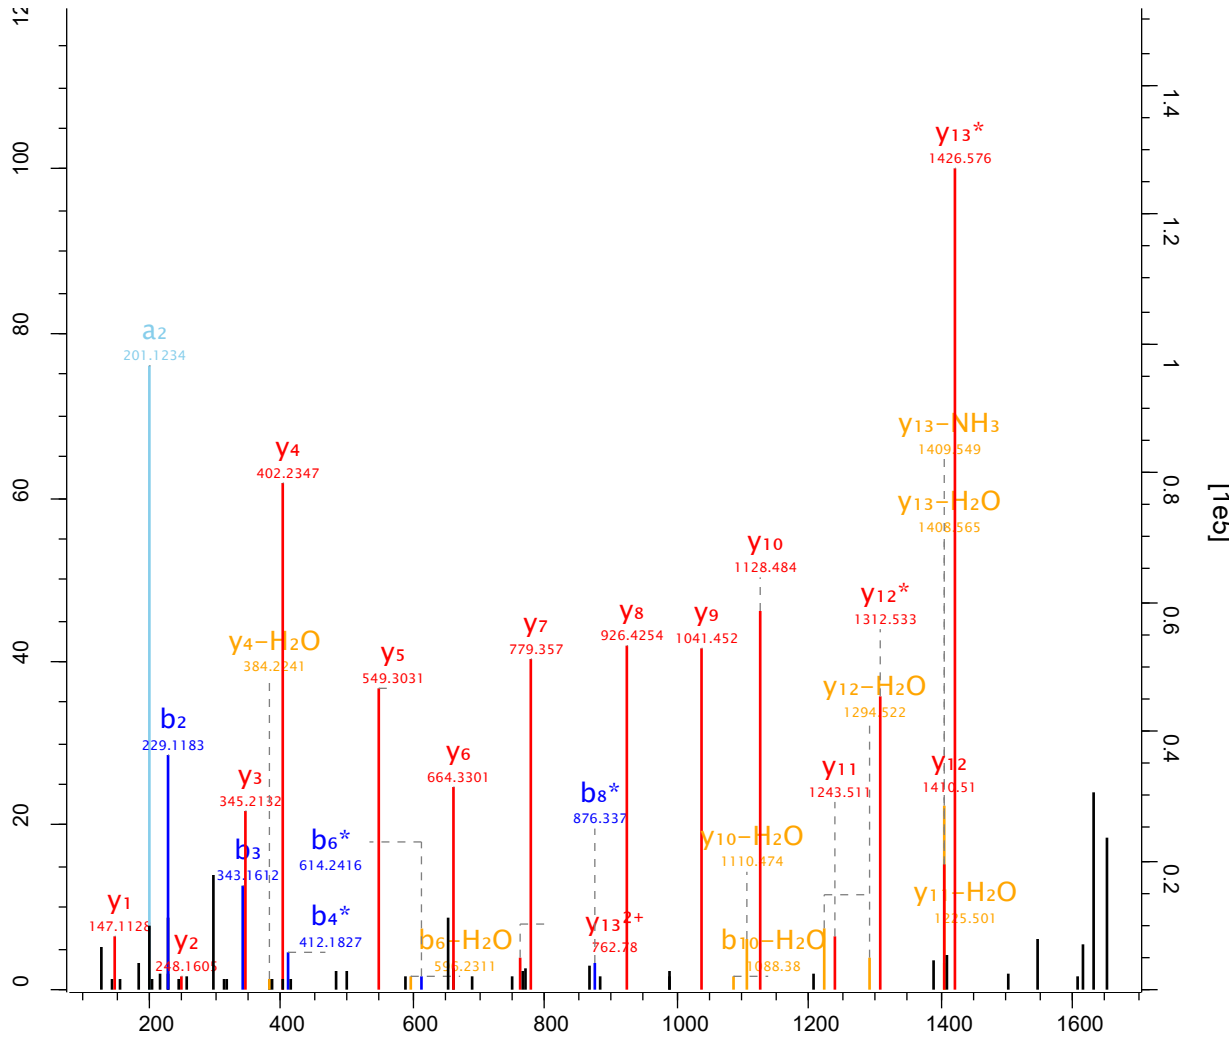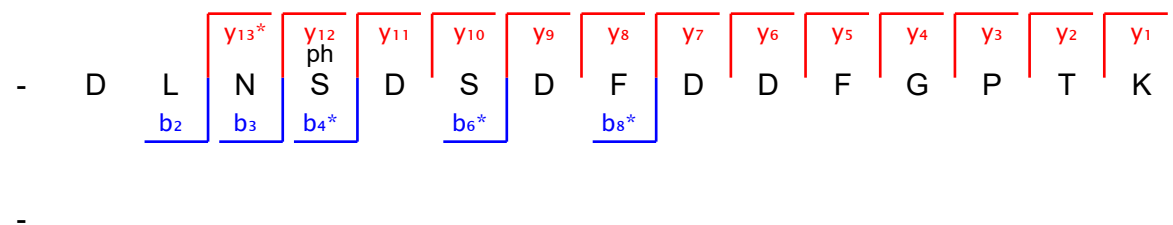

Raw file Scan Method Score m/z  
 sys\_15\_1 3815 FTMS; HCD 226.99 870.37

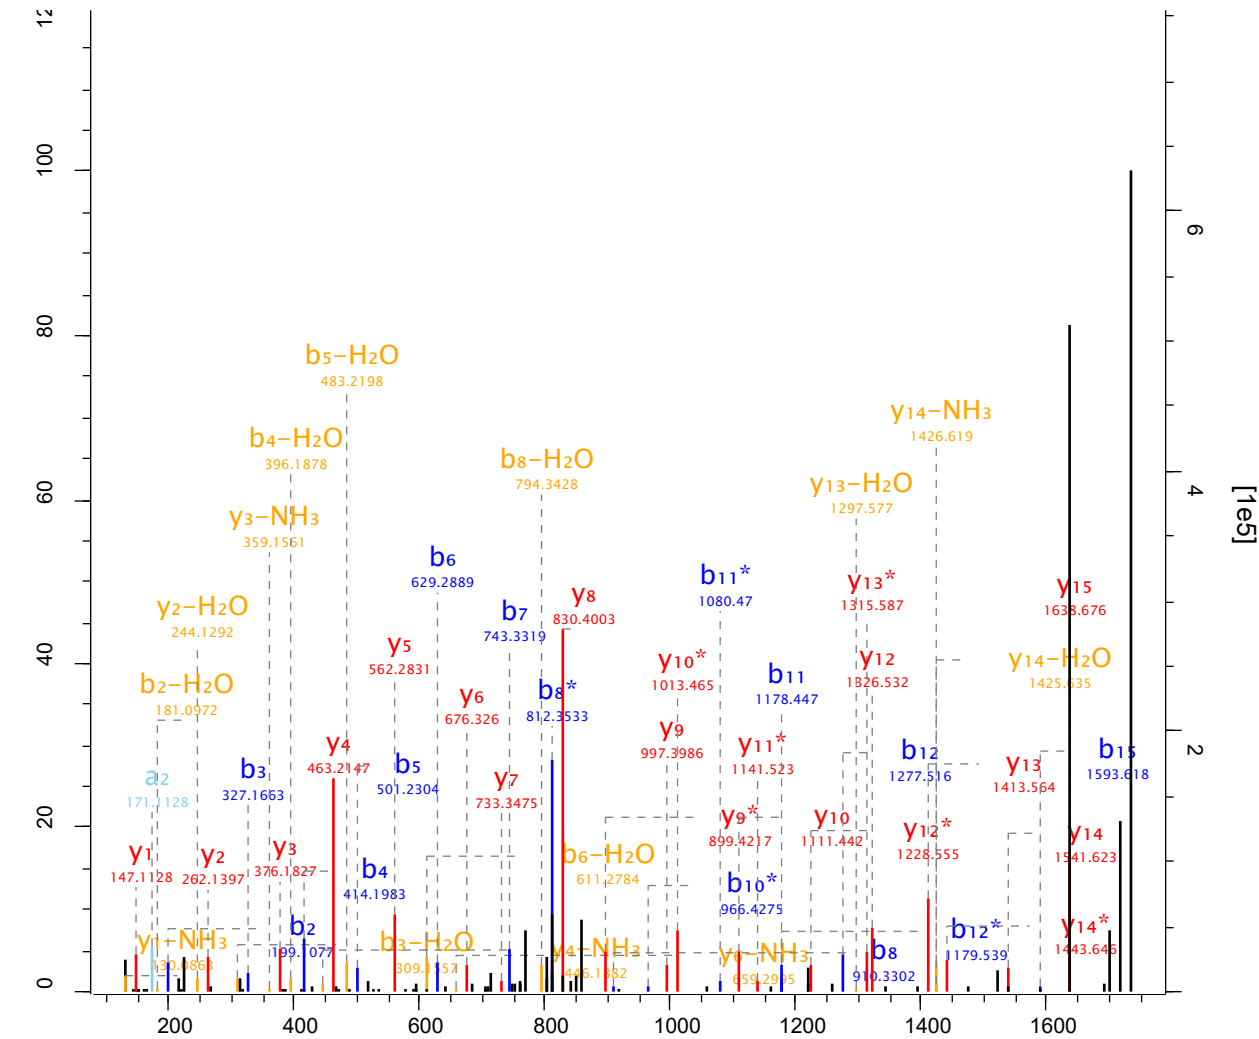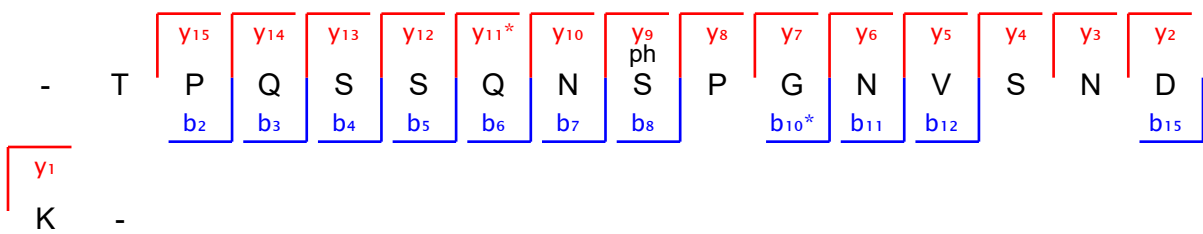

Raw file Scan Method Score m/z  
 sys\_15\_1 38231 FTMS; HCD 131.33 718.35

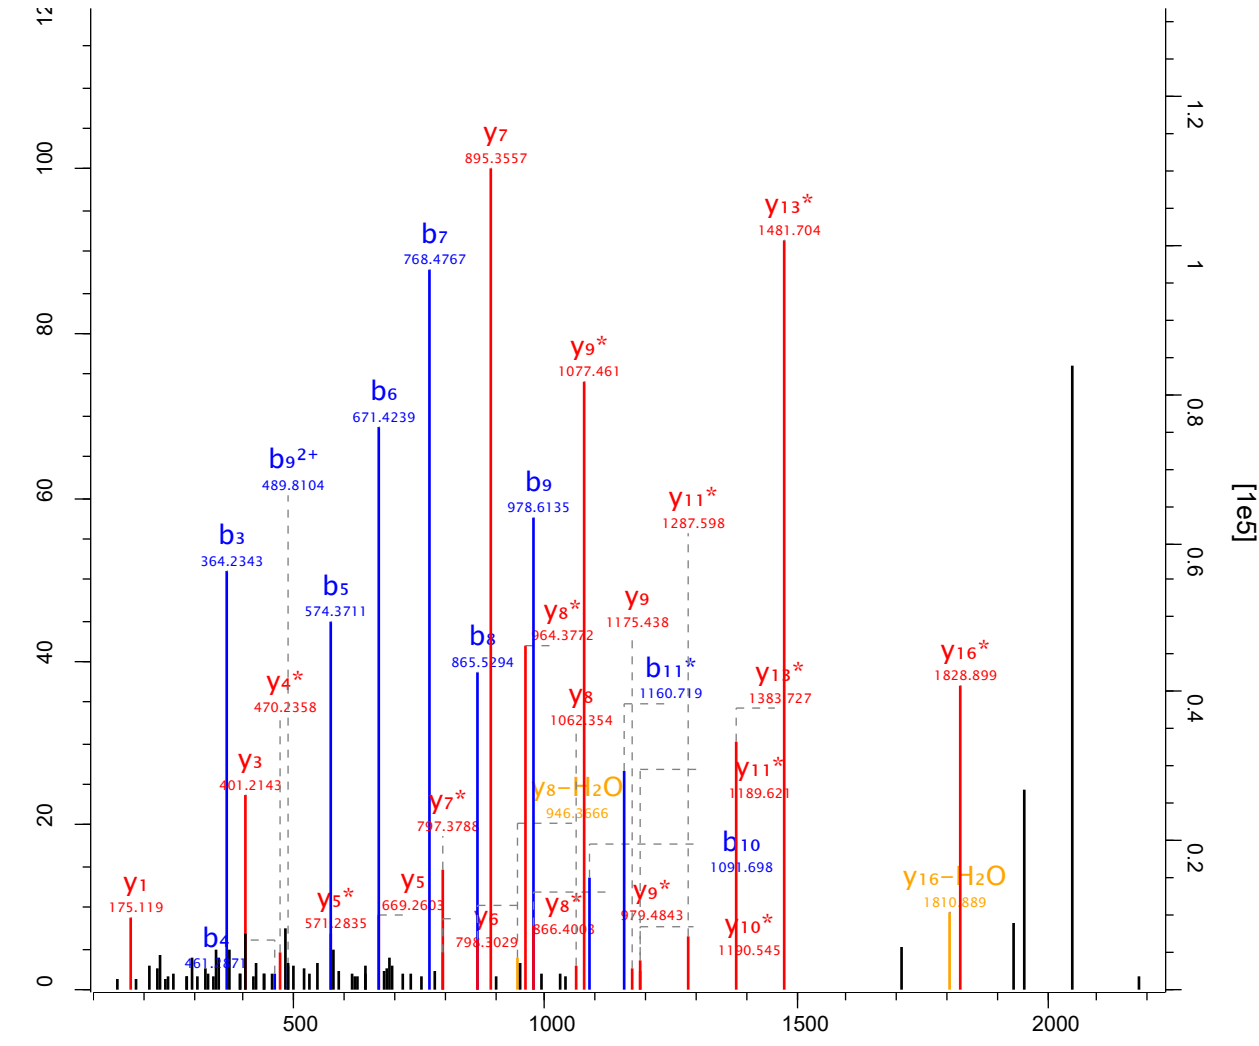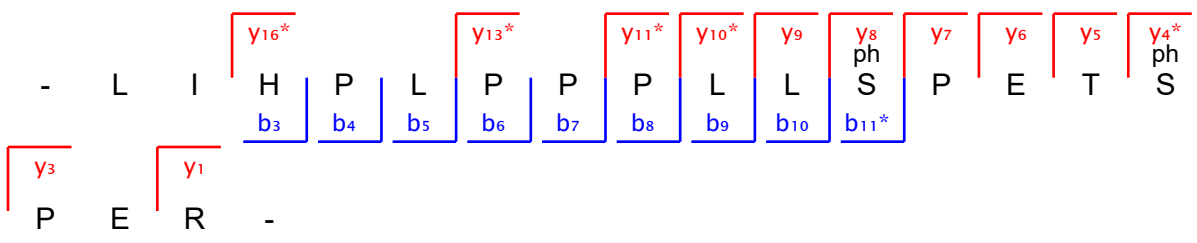

Raw file Scan Method Score m/z  
 sys\_15\_1 3835 FTMS; HCD 58.69 802.78

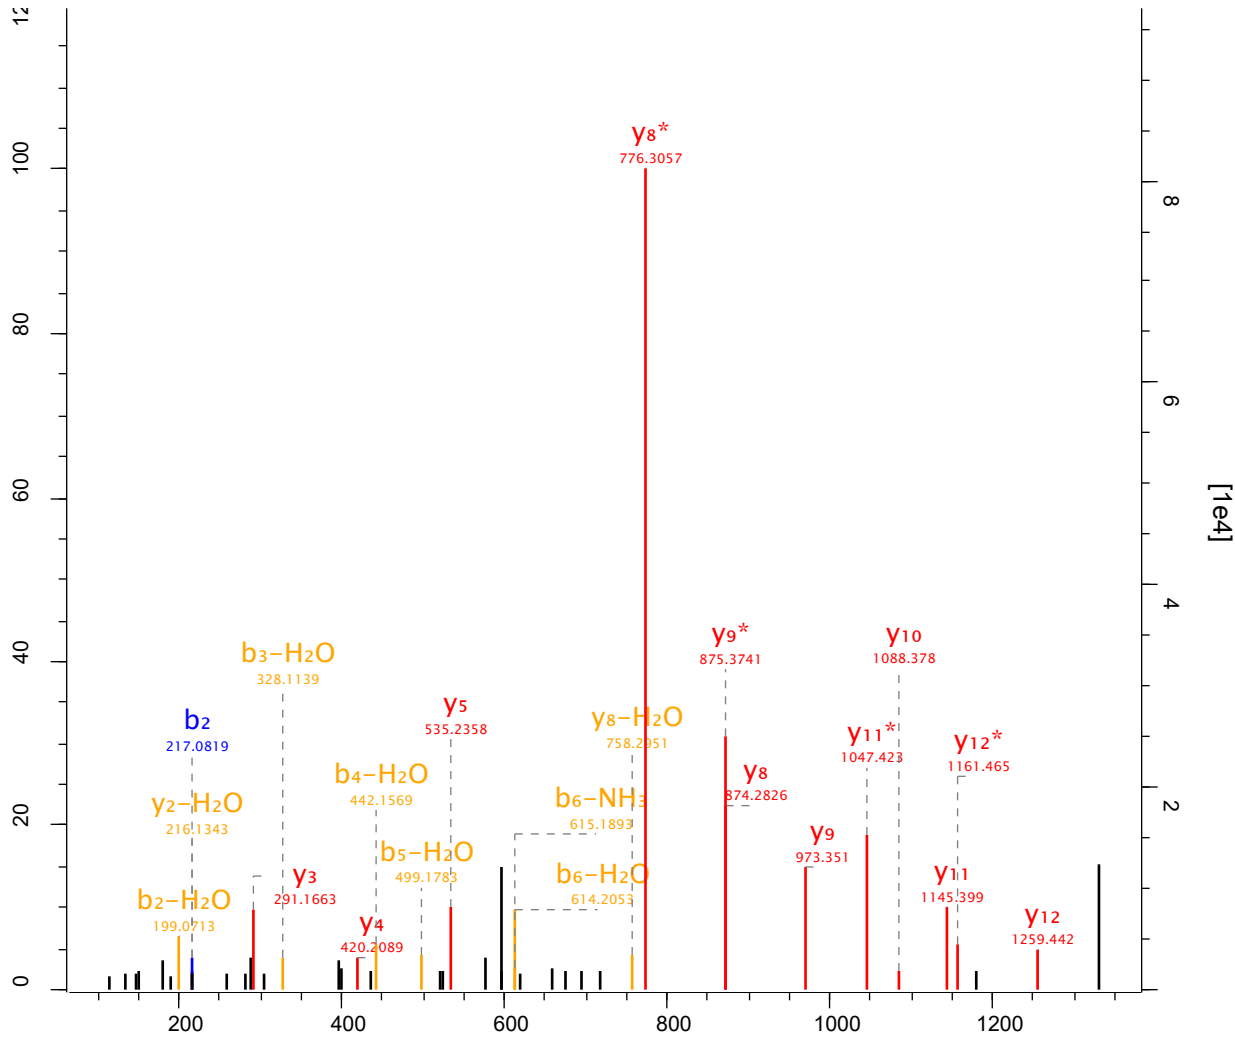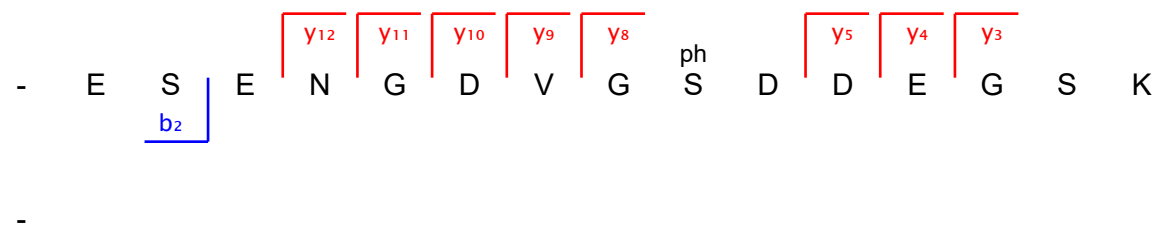



Raw file Scan Method Score m/z  
 sys\_15\_1 38425 FTMS; HCD 159.14 1085.99

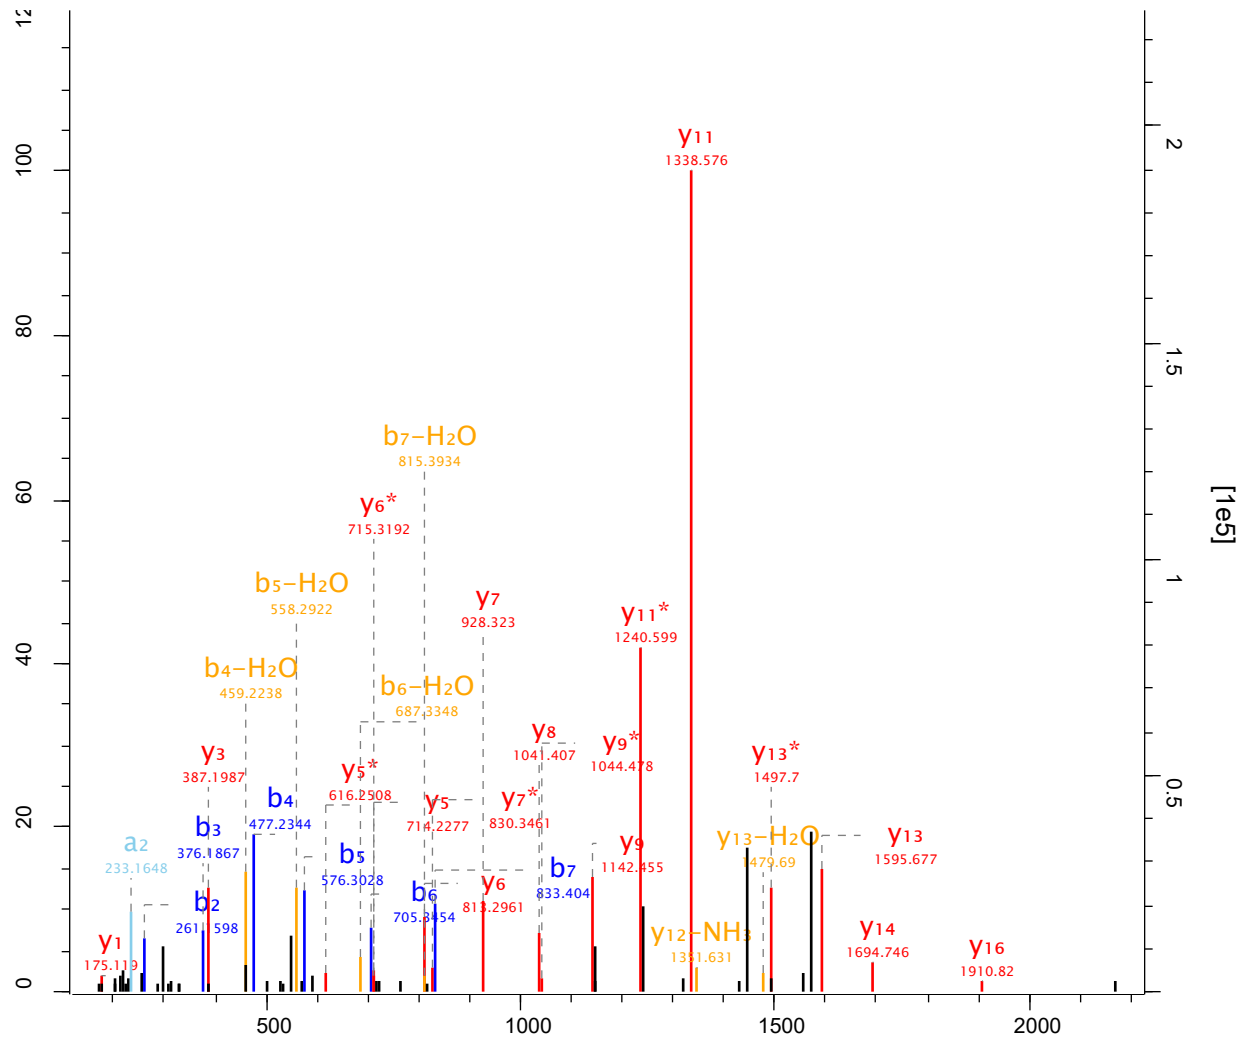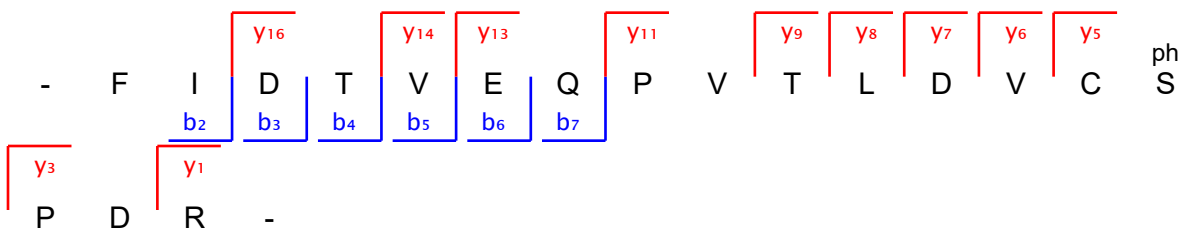

Raw file Scan Method Score m/z  
 sys\_15\_1 38484 FTMS; HCD 124.51 1138.46

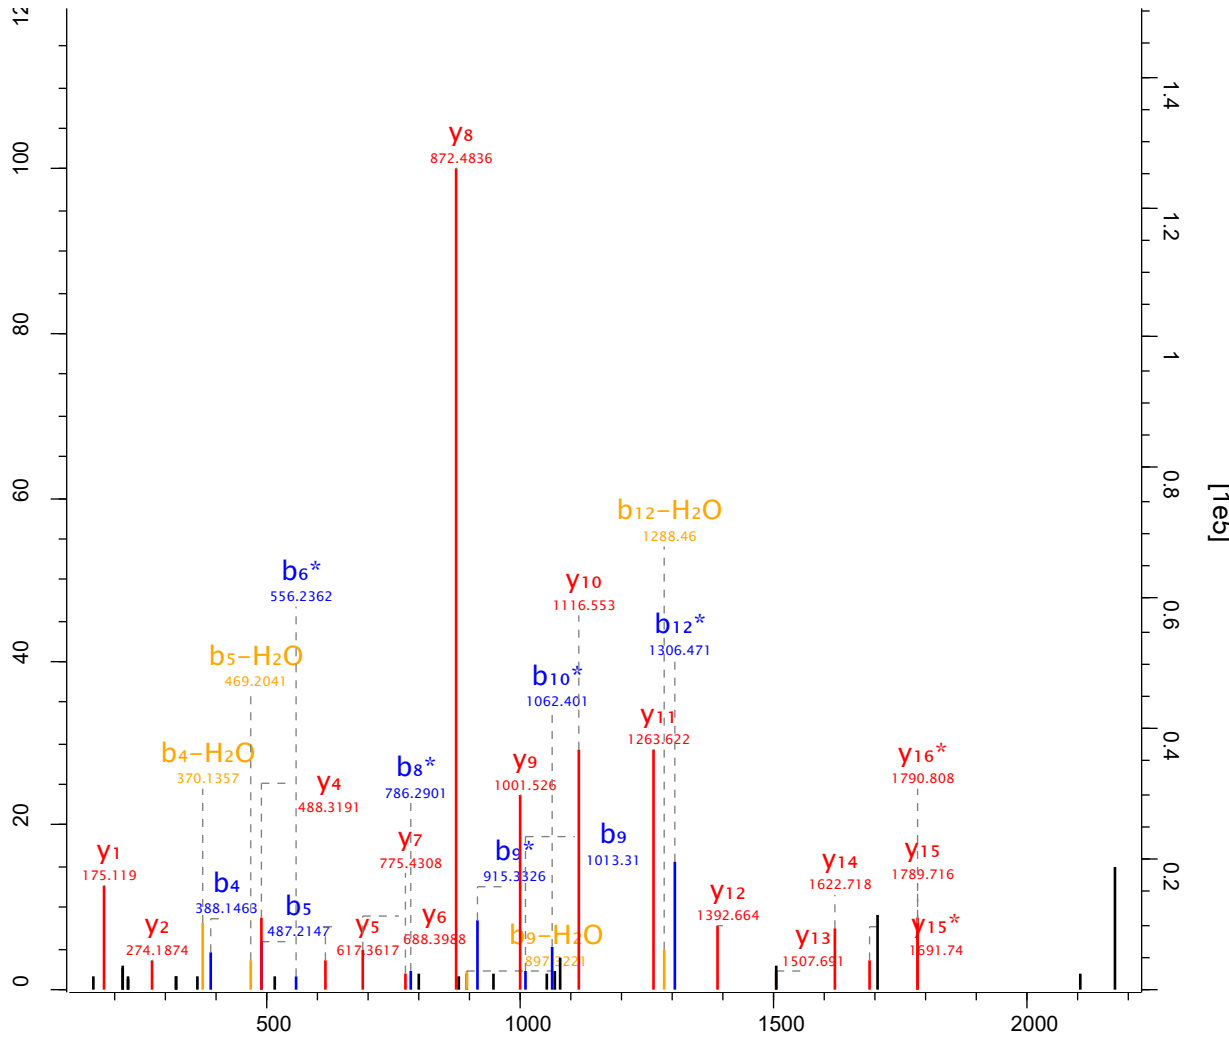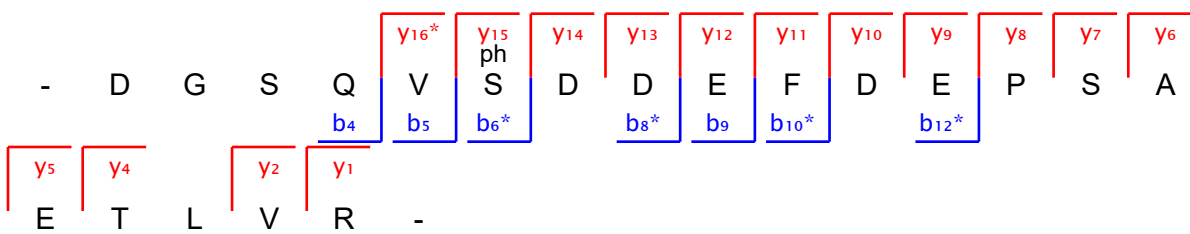

Raw file Scan Method Score m/z  
 sys\_15\_1 3851 FTMS; HCD 88.71 594.76

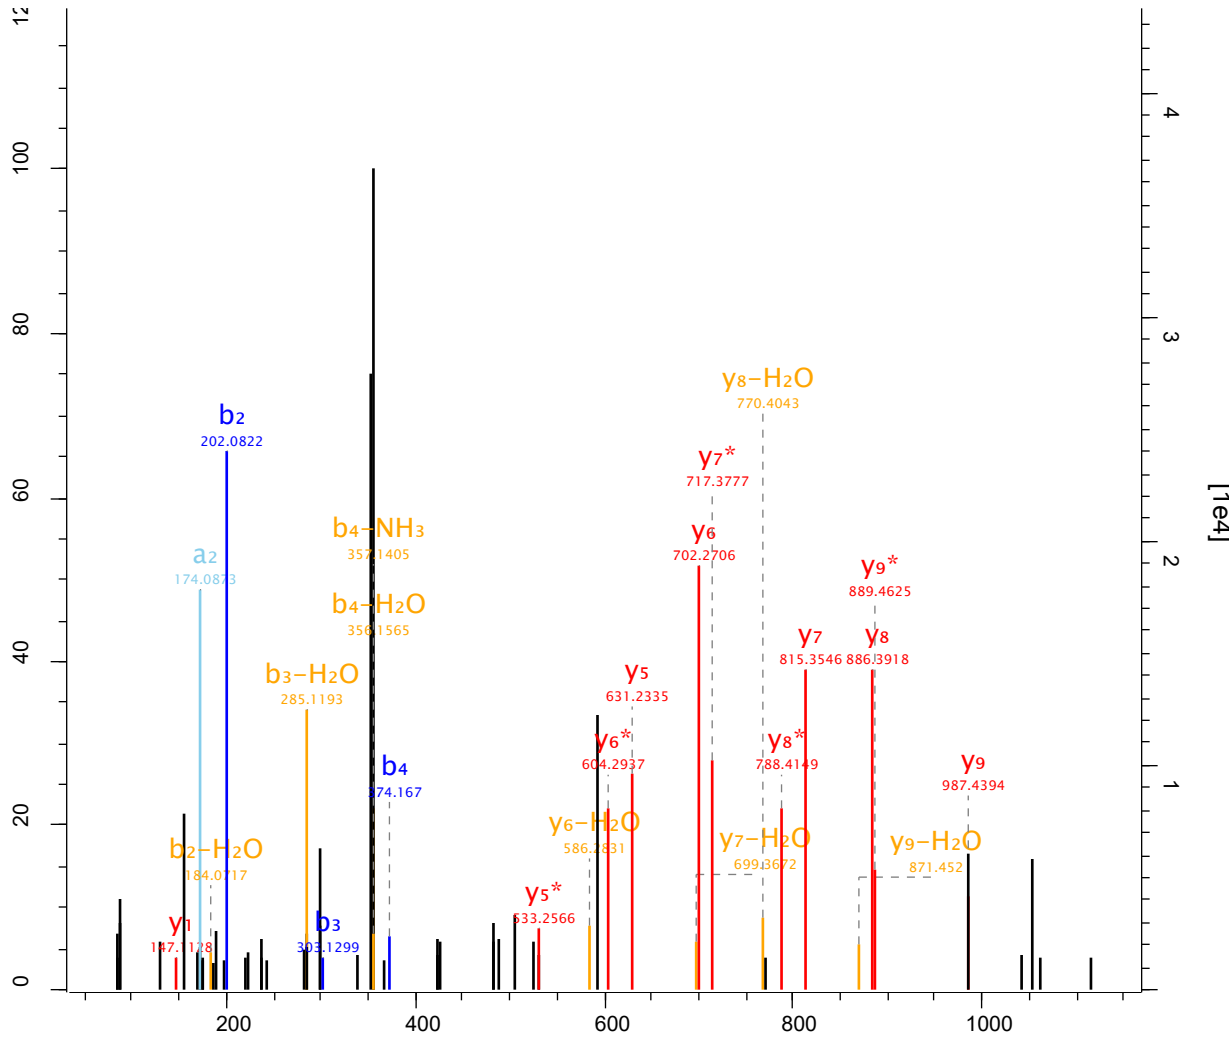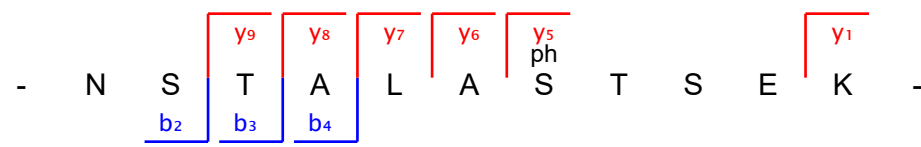

Raw file Scan Method Score m/z  
 sys\_15\_1 38596 FTMS; HCD 111.01 887.03

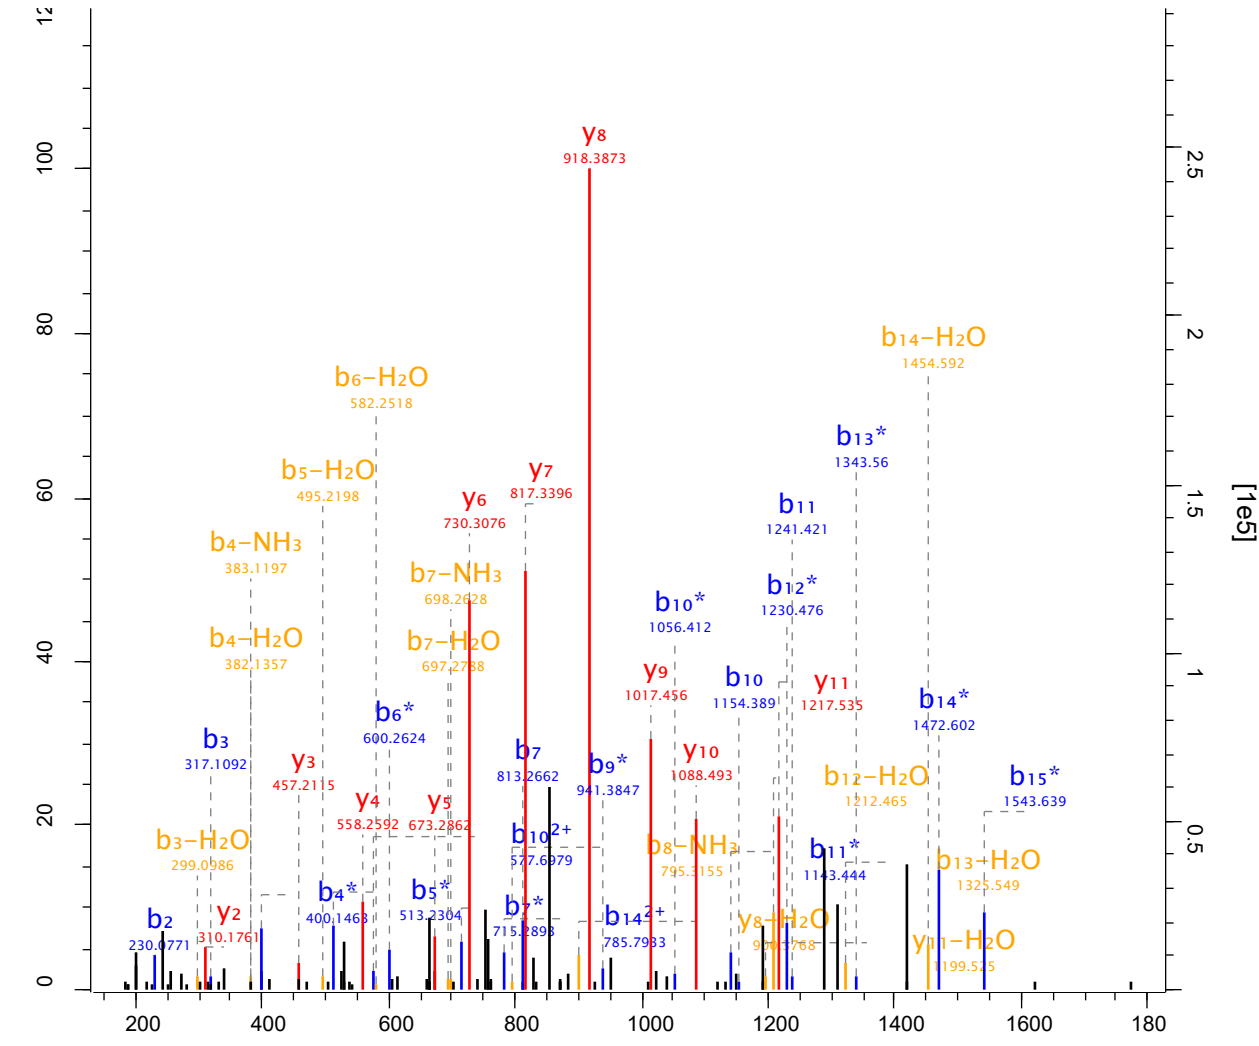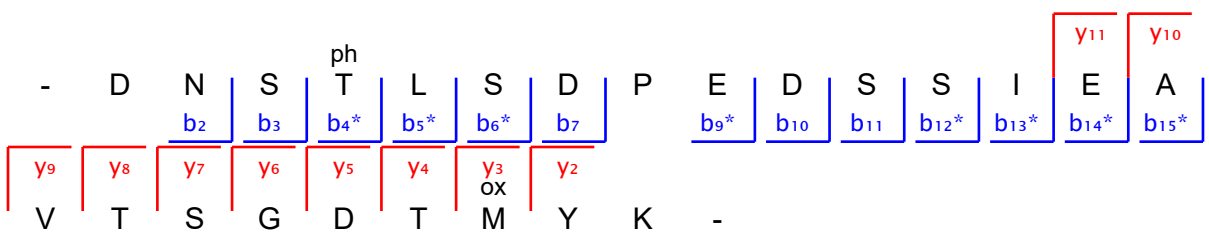

Raw file Scan Method Score m/z  
 sys\_15\_1 38621 FTMS; HCD 203.19 902.03

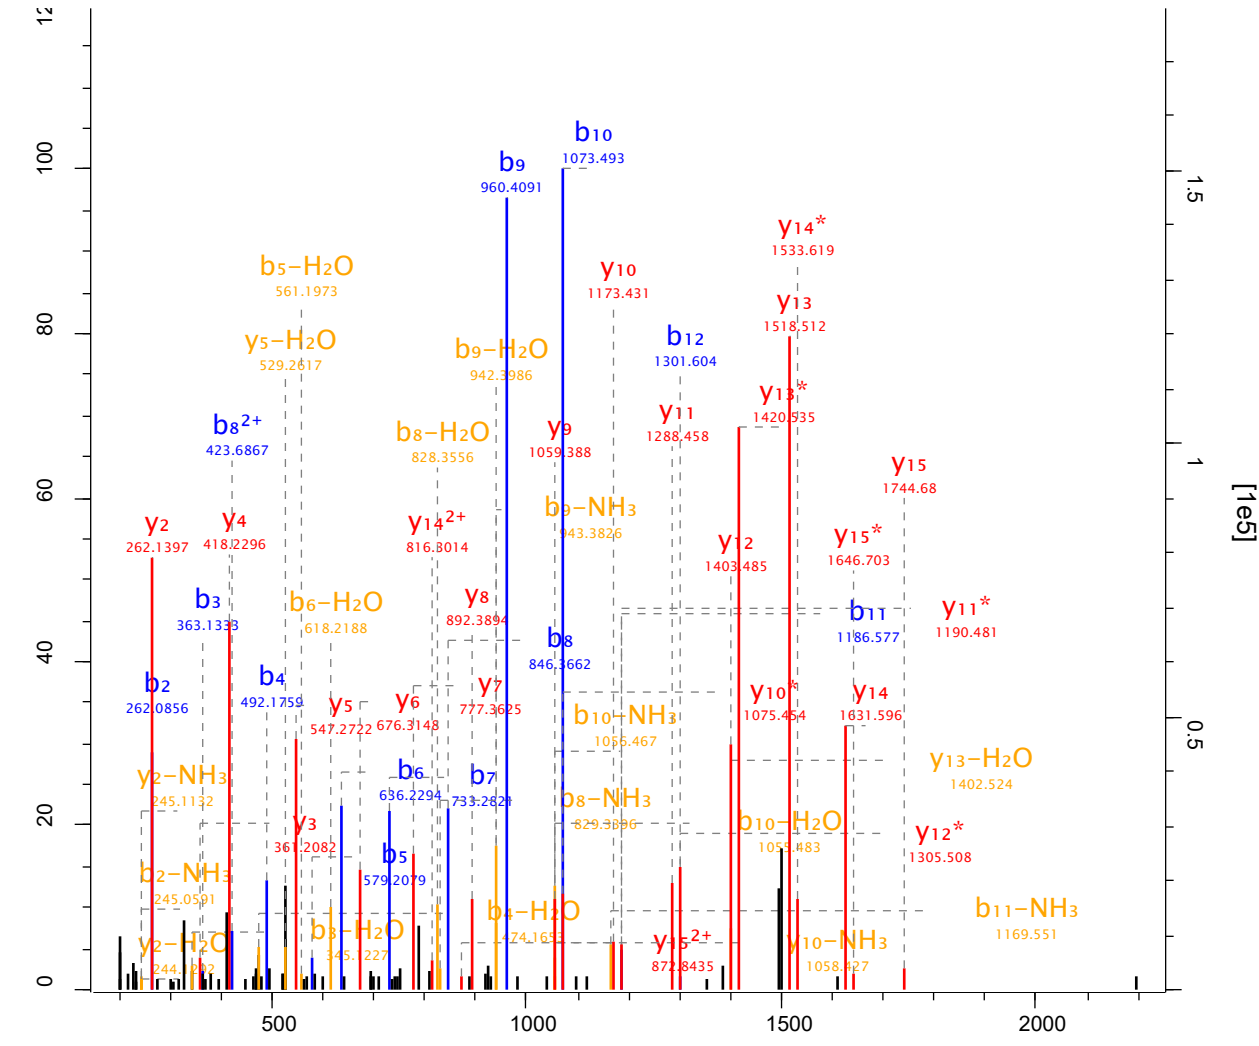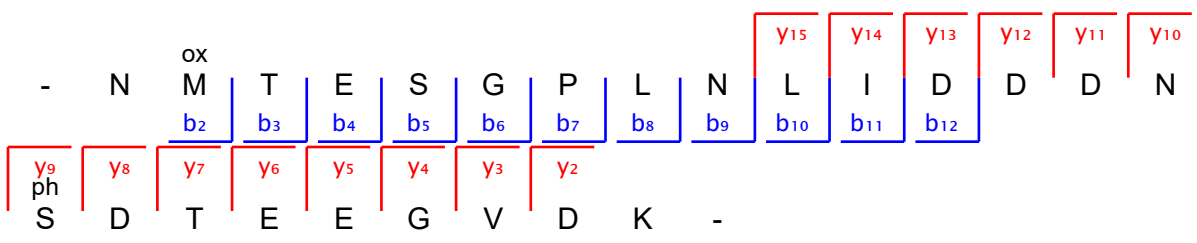

Raw file Scan Method Score m/z  
 sys\_15\_1 38623 FTMS; HCD 205.95 805.87

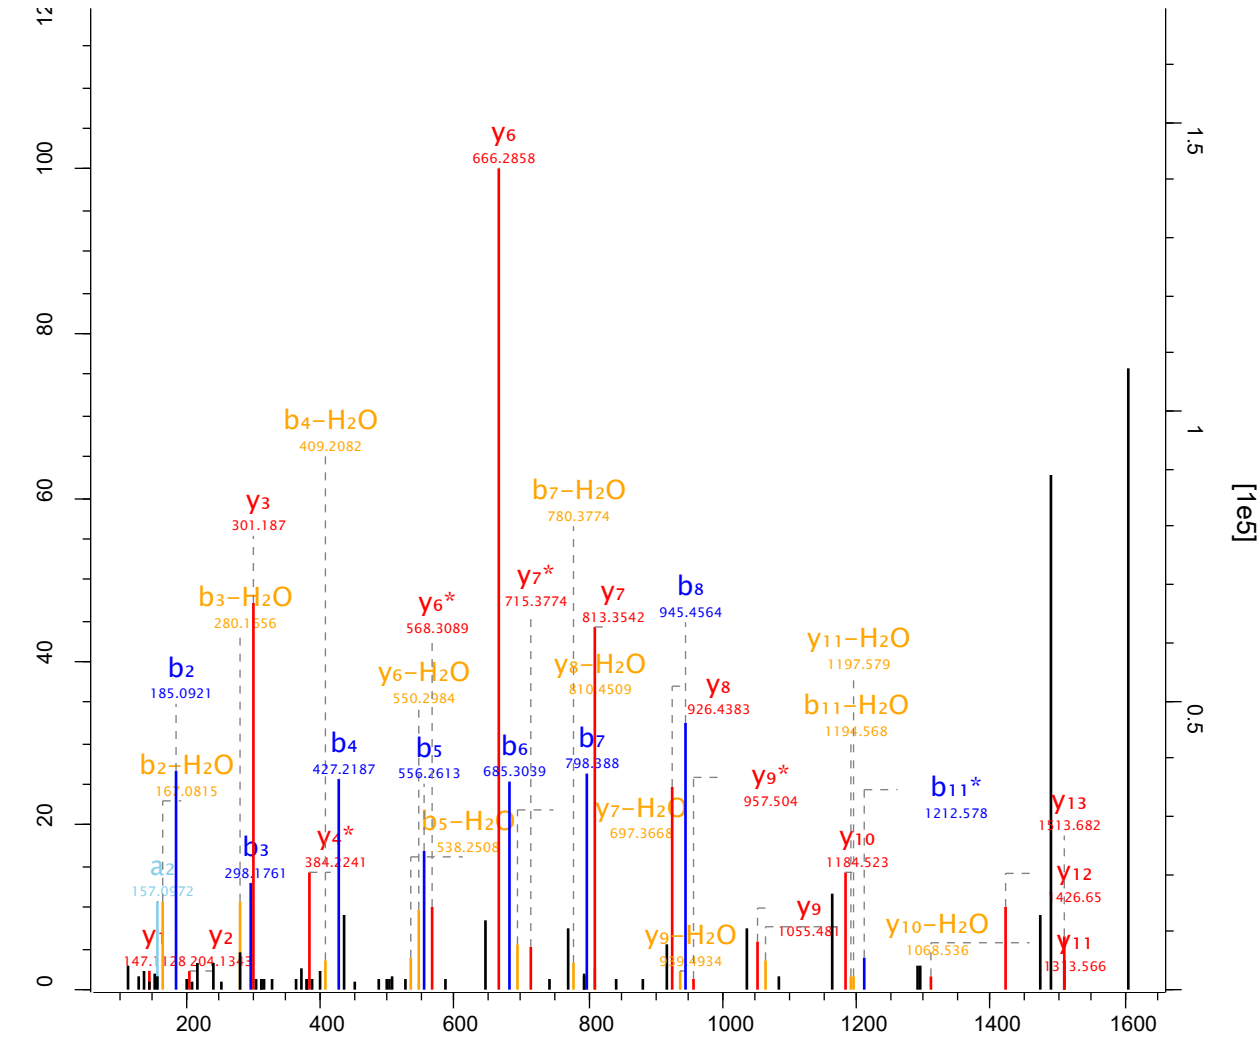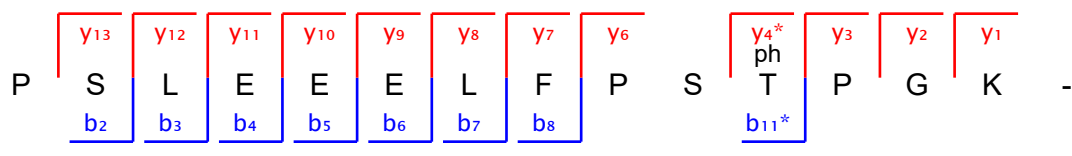

Raw file Scan Method Score m/z  
 sys\_15\_1 38872 FTMS; HCD 98.3 761.03

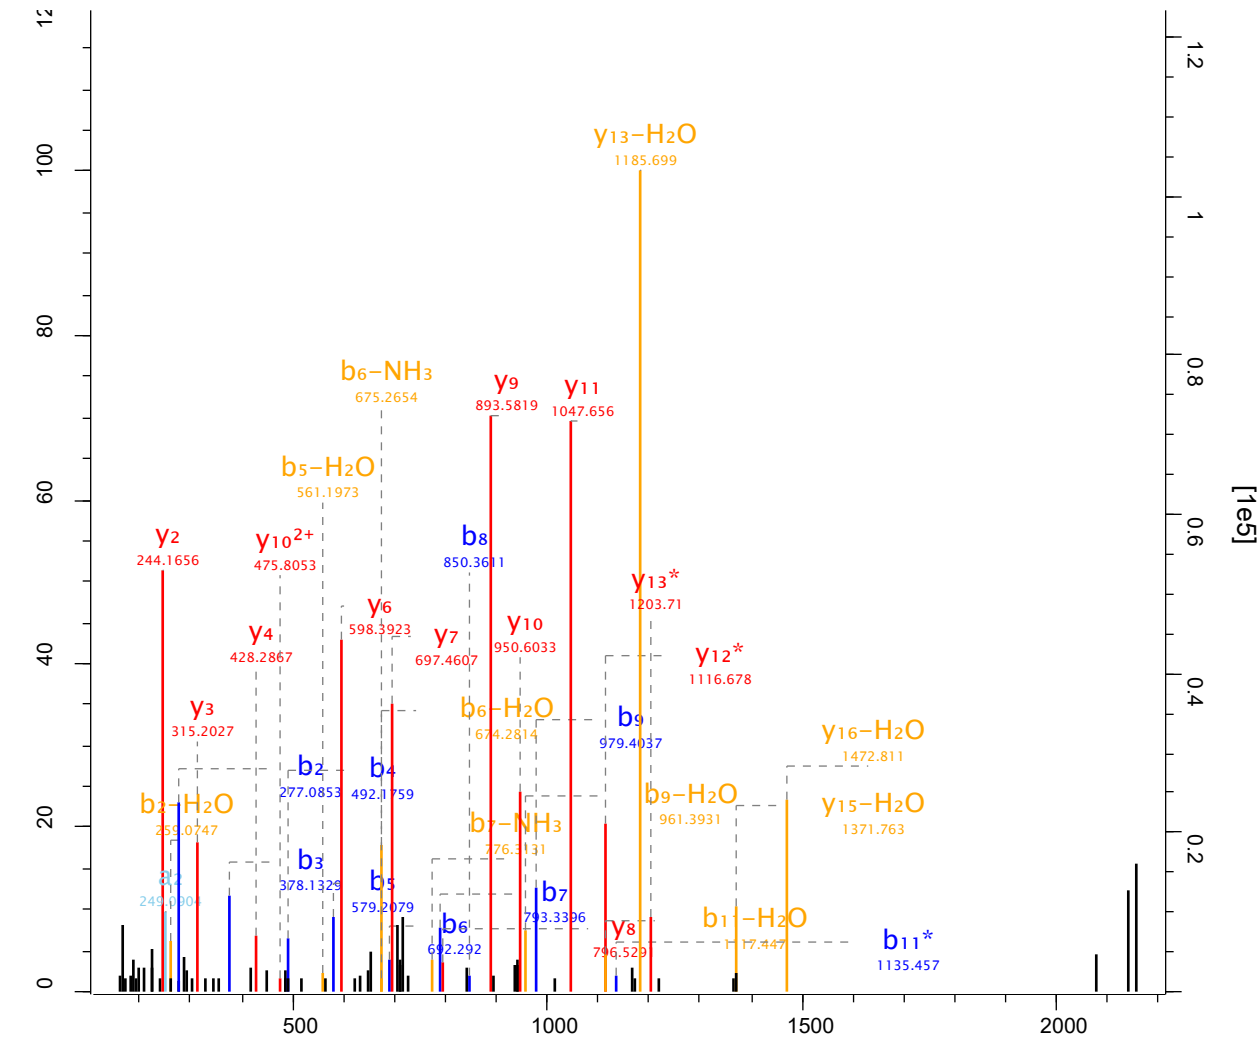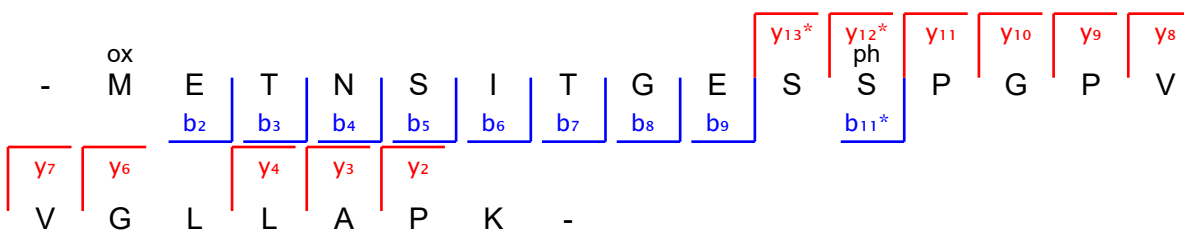

| Raw file | Scan | Method    | Score | m/z    |
|----------|------|-----------|-------|--------|
| sys_15_1 | 3888 | FTMS; HCD | 61.78 | 462.69 |

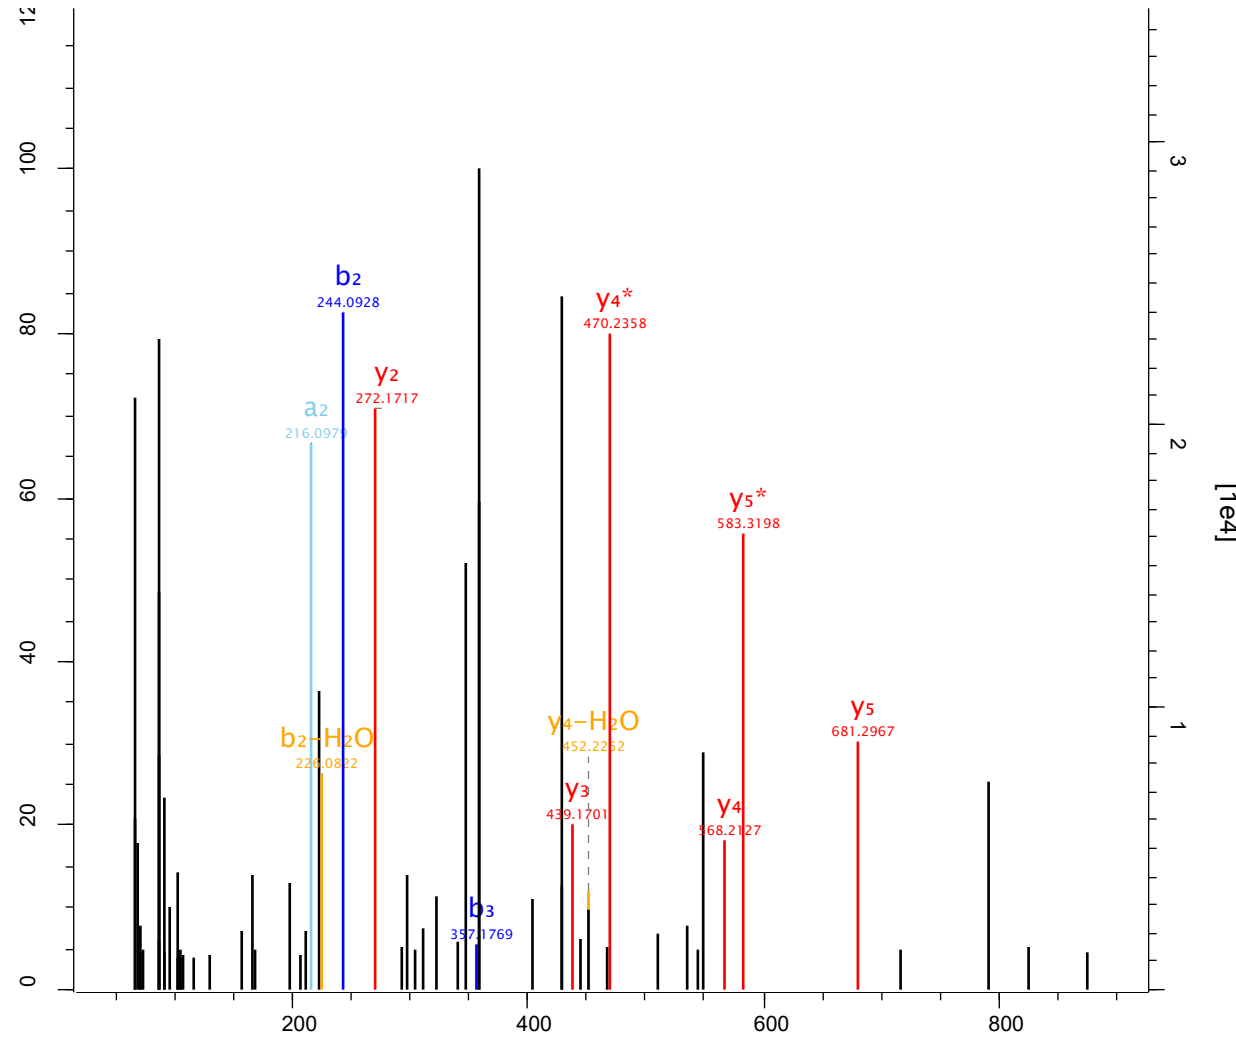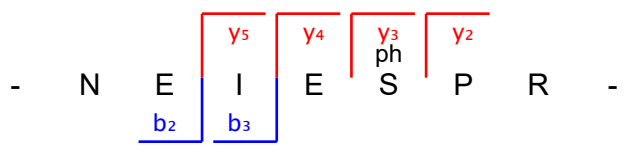



Raw file Scan Method Score m/z  
 sys\_15\_1 39109 FTMS; HCD 45.92 837.88

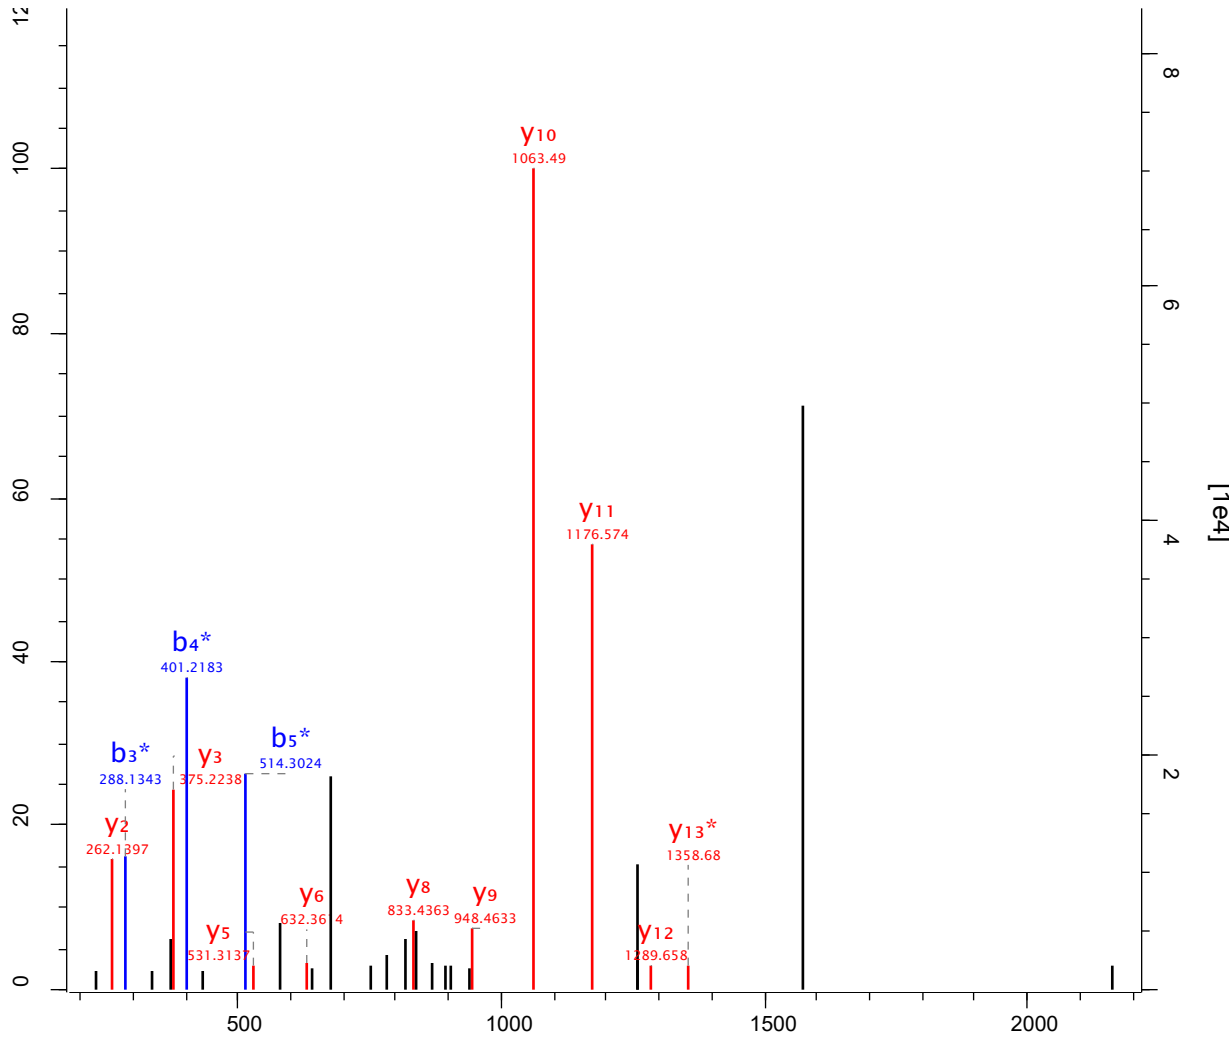

- A F S L I D D S N T G V L D K

Fragmentation mapping (b and y ions):

- b3\* (blue box) covers S, L, I
- b4\* (blue box) covers L, I
- b5\* (blue box) covers I
- y2 (red box) covers L, I
- y3 (red box) covers L, I, D
- y5 (red box) covers T, G
- y6 (red box) covers T, G
- y8 (red box) covers S
- y9 (red box) covers D
- y10 (red box) covers D
- y11 (red box) covers I, D
- y12 (red box) covers L, I
- y13\* (red box) covers S

Raw file Scan Method Score m/z  
 sys\_15\_1 39289 FTMS; HCD 64.7 838.42

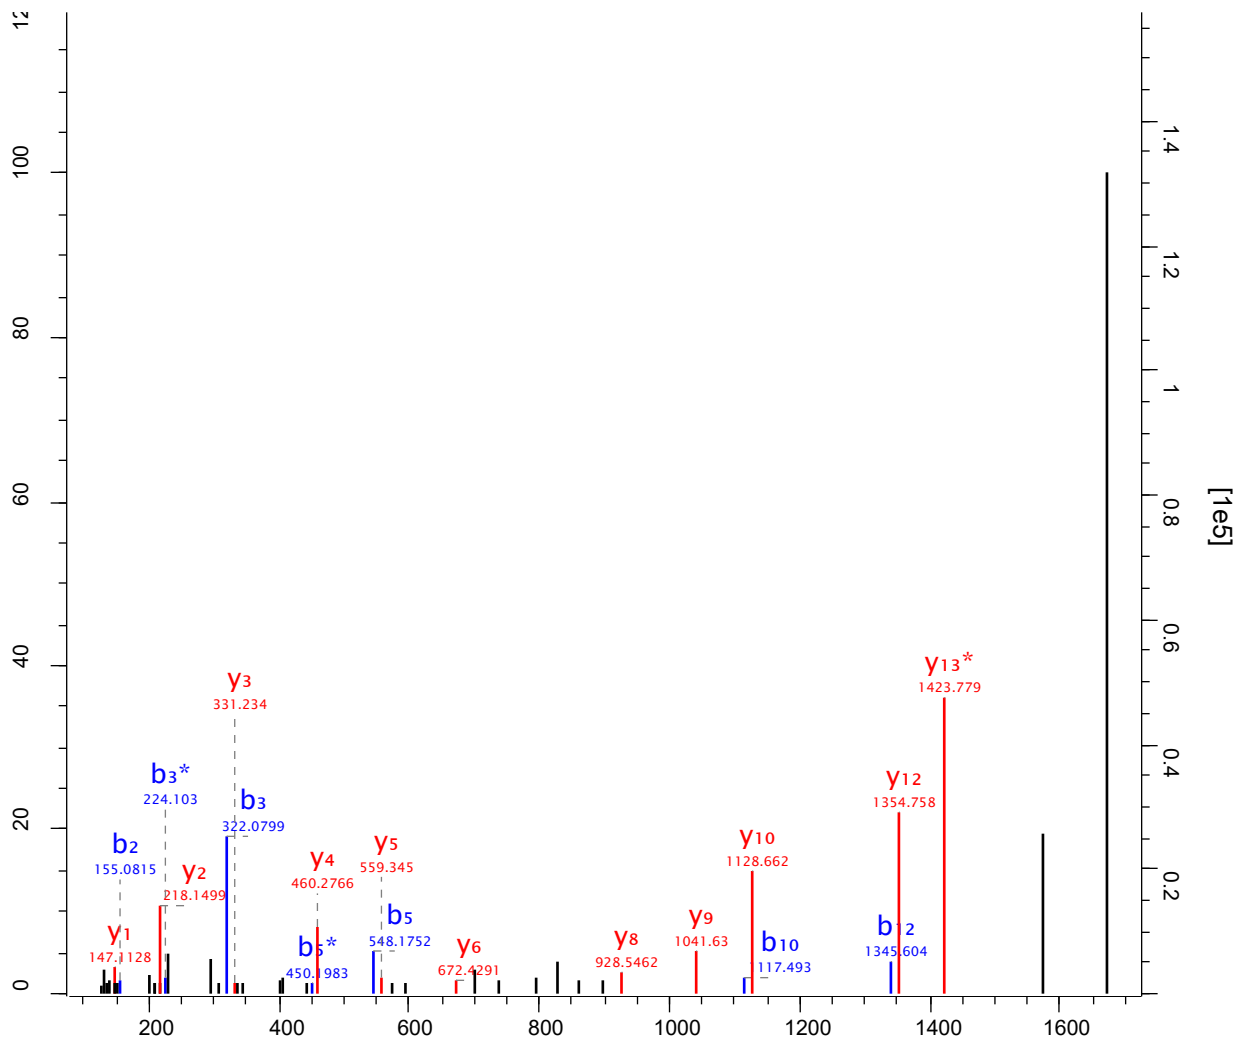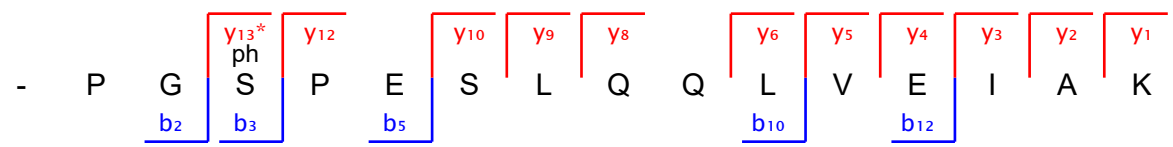

Raw file Scan Method Score m/z  
 sys\_15\_1 39425 FTMS; HCD 218.12 747.88

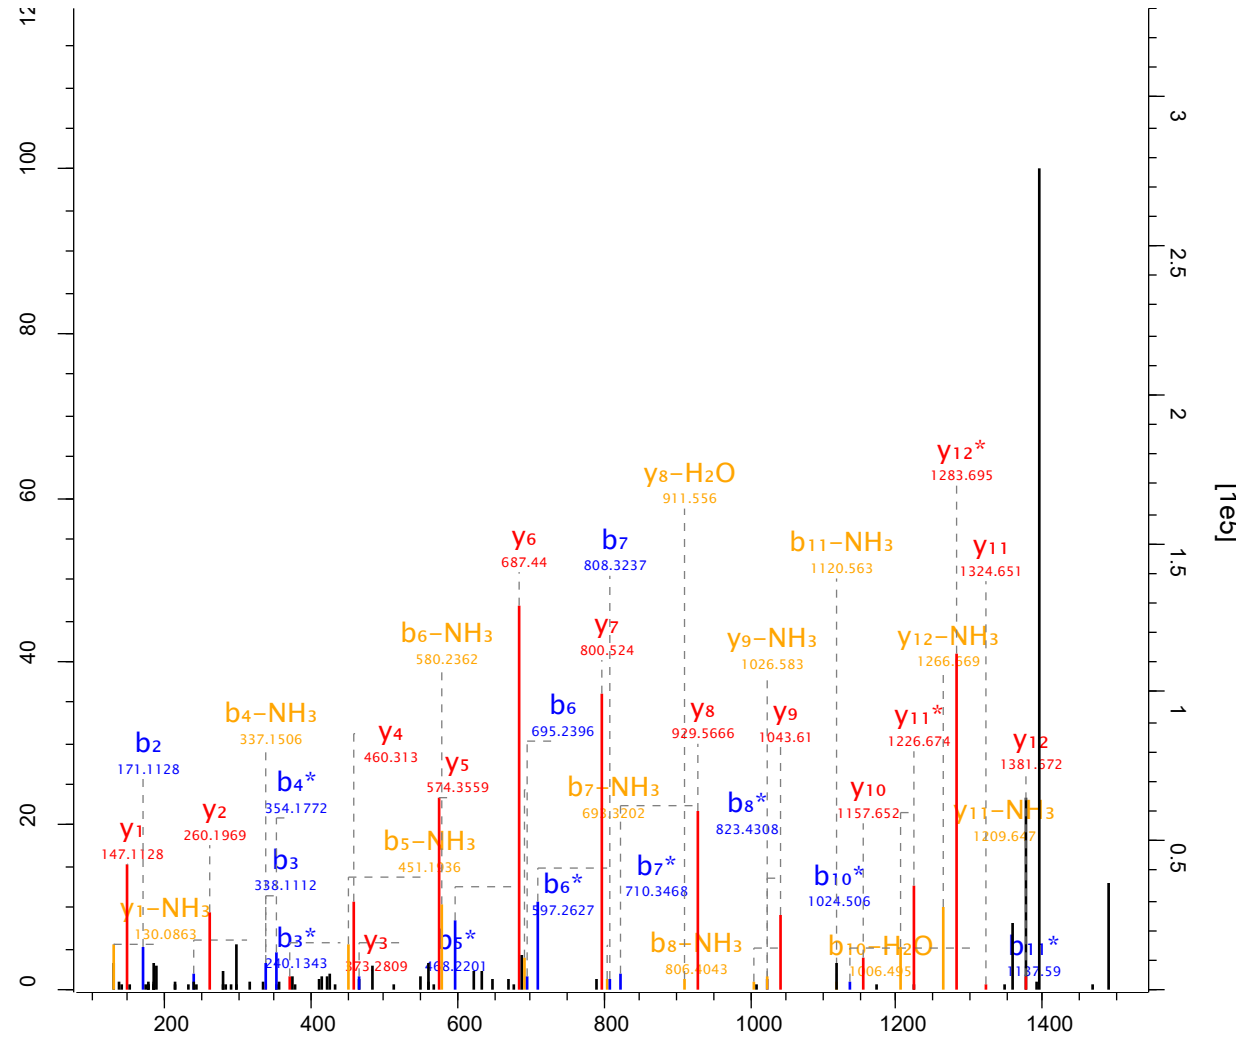

y12 y11 y10 y9 y8 y7 y6 y5 y4 y3 y2 y1  
 - I G S N N E I L N S L I K -  
b2 b3 b4\* b5\* b6 b7 b8\* b10\* b11\*

Raw file Scan Method Score m/z  
 sys\_15\_1 3966 FTMS; HCD 120.77 532.69

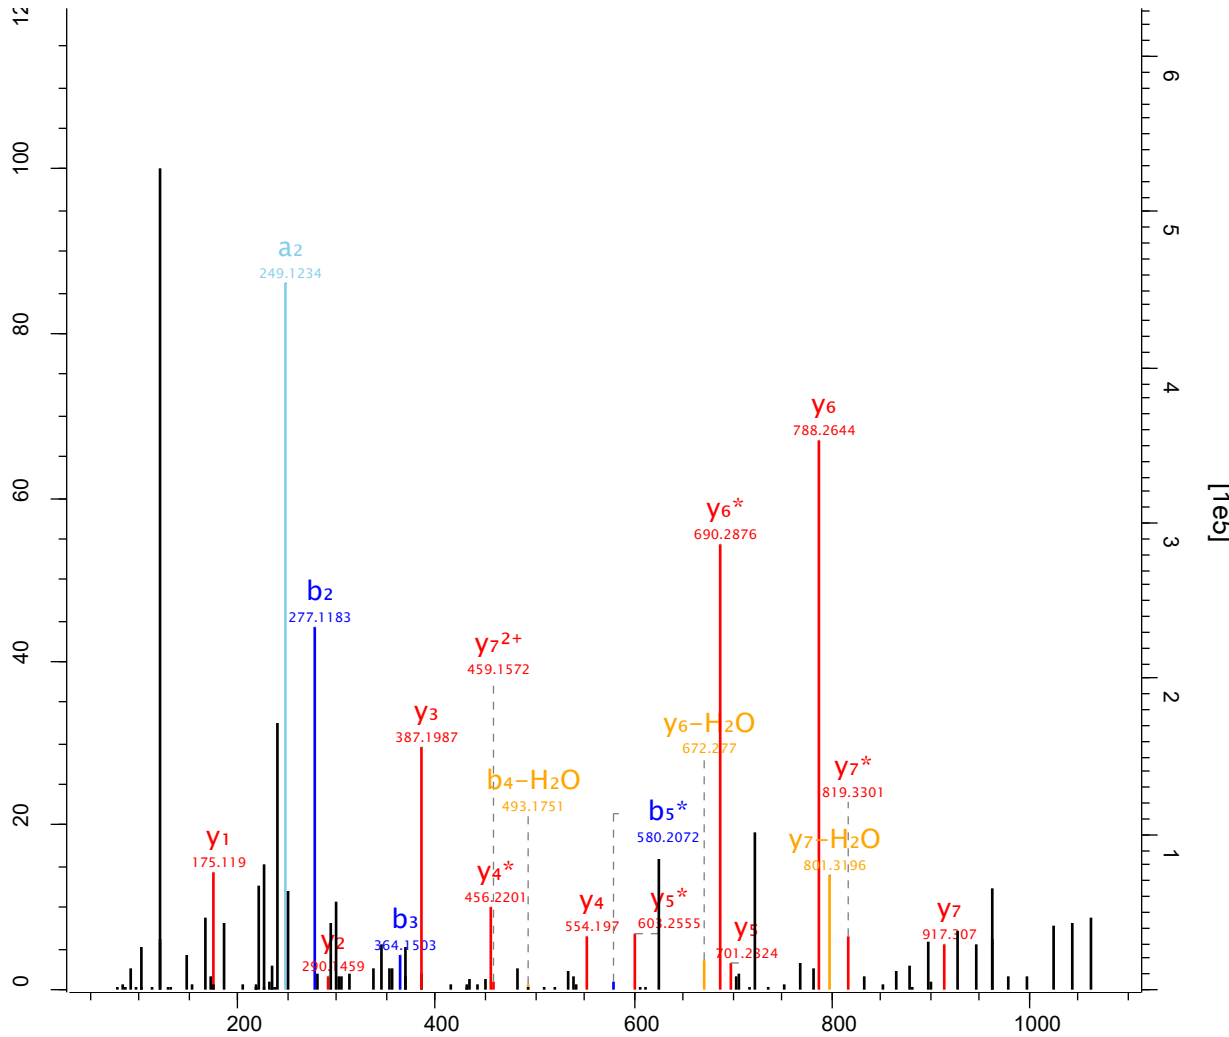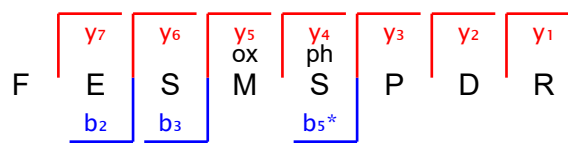

Raw file Scan Method Score m/z  
 sys\_15\_1 39821 FTMS; HCD 43.7 747.31

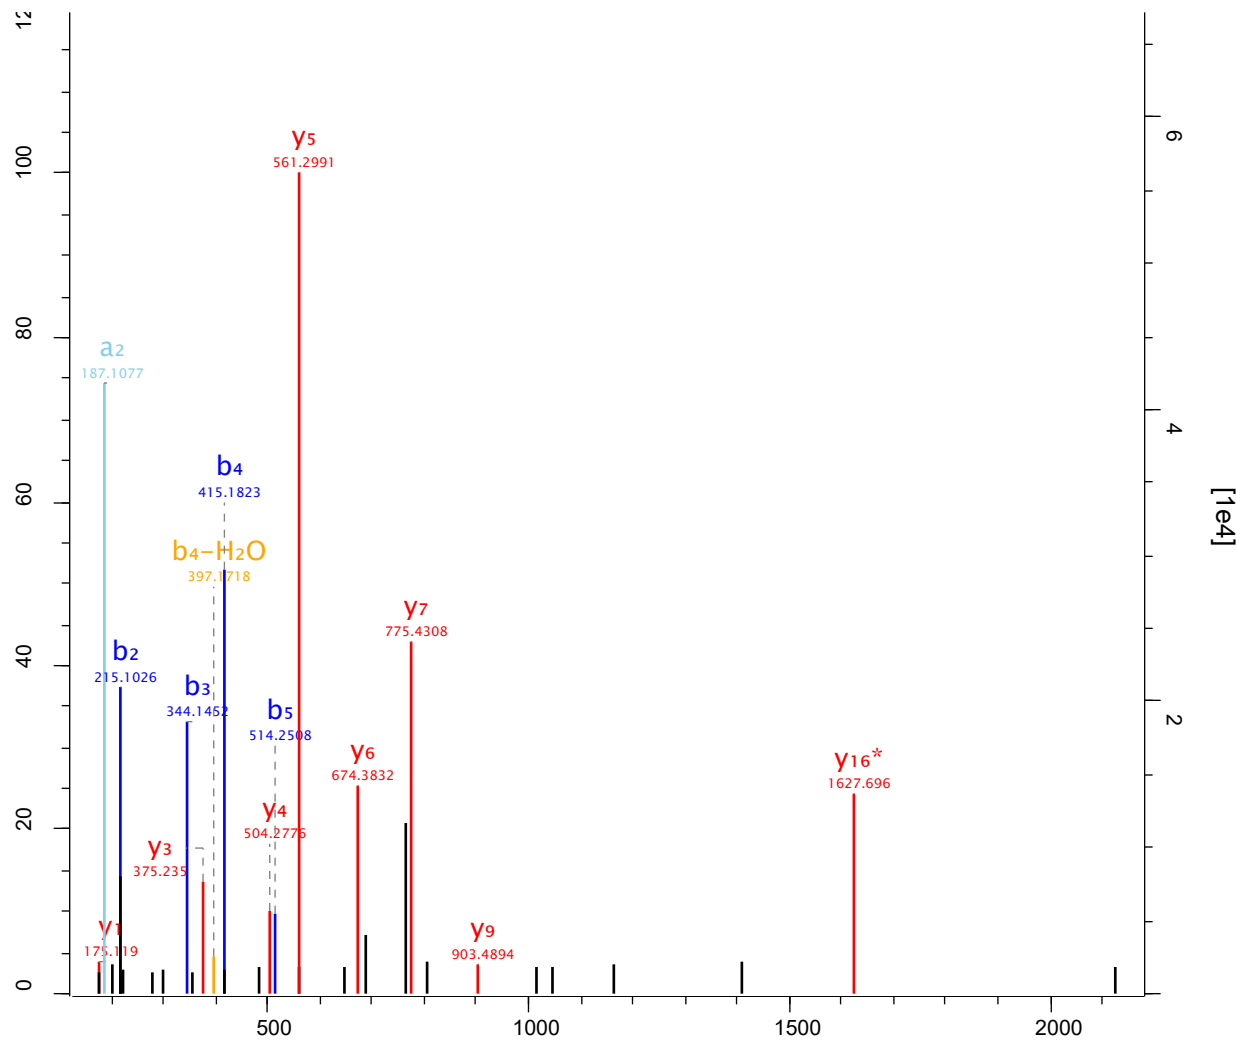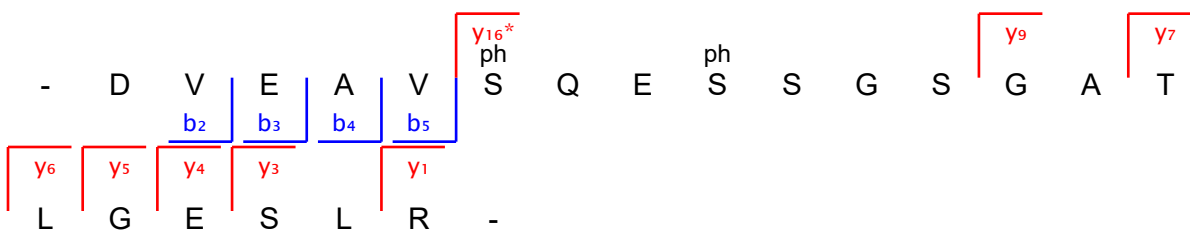

Raw file Scan Method Score m/z  
 sys\_15\_1 39897 FTMS; HCD 166.47 869.87

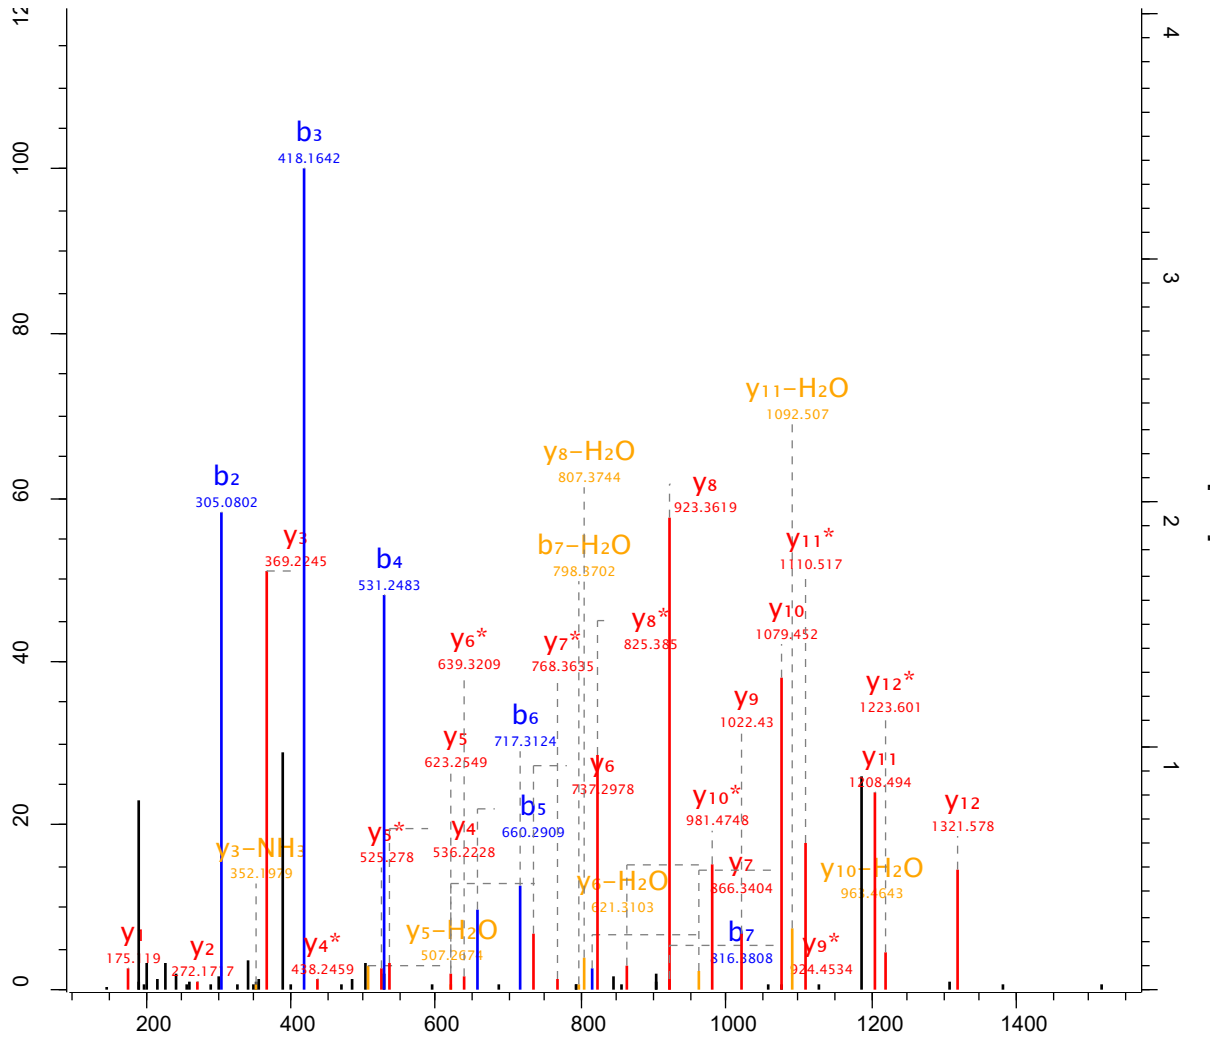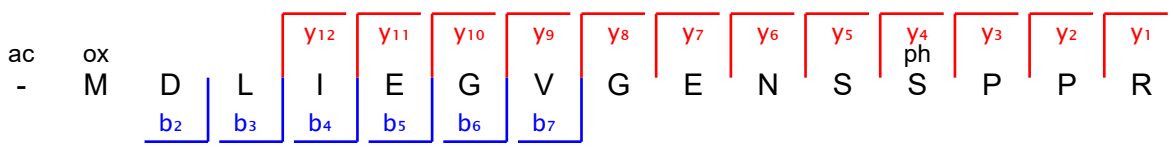

Supplement: 143488_2_supp_337929_ps5hgj.pdf [file 143488_2_supp_337929_ps5hgj.pdf]
