# Supplementary material for: The Systemin Signaling Cascade As Derived from Time Course Analyses of the Systemin-responsive Phosphoproteome
Source: PubMed Central journal article supplement (PMC6683004; doi:10.1074/mcp.ra119.001367), 2019-05-28

**Supplementary Figure 2:** Representative annotated spectra of identified phosphopeptides under systemin,A17 and water treatment as exported from MaxQuant.

Raw file Scan Method Score m/z  
 sys\_15\_1 4012 FTMS; HCD 51.73 556.18

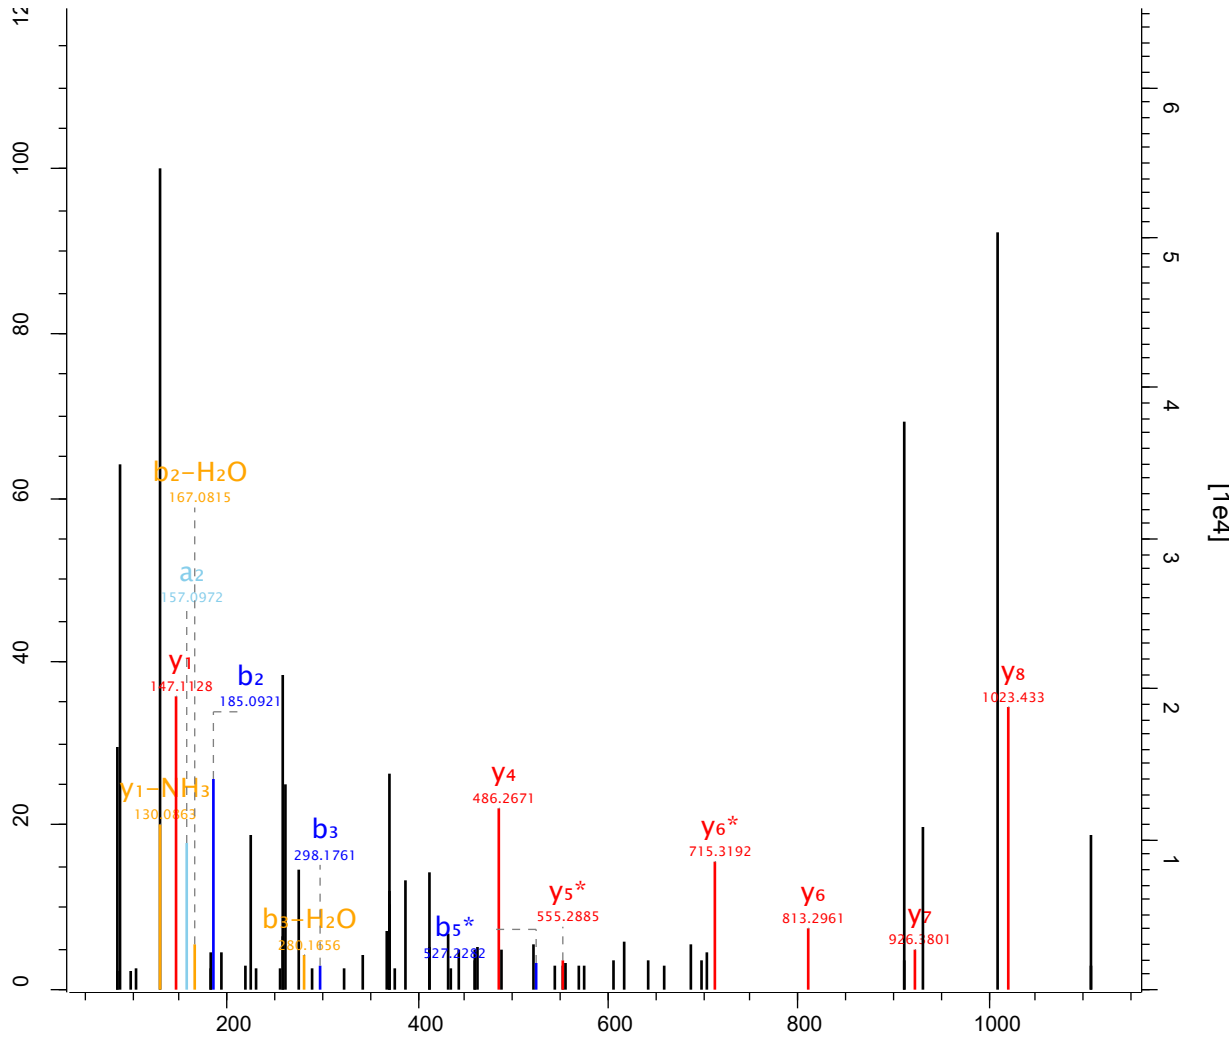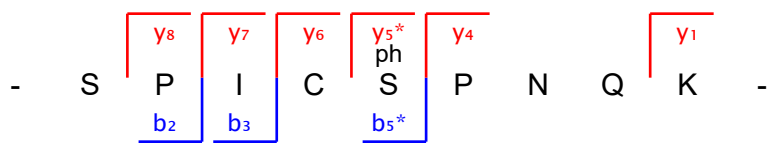

Raw file Scan Method Score m/z  
 sys\_15\_1 40251 FTMS; HCD 162.87 930.74

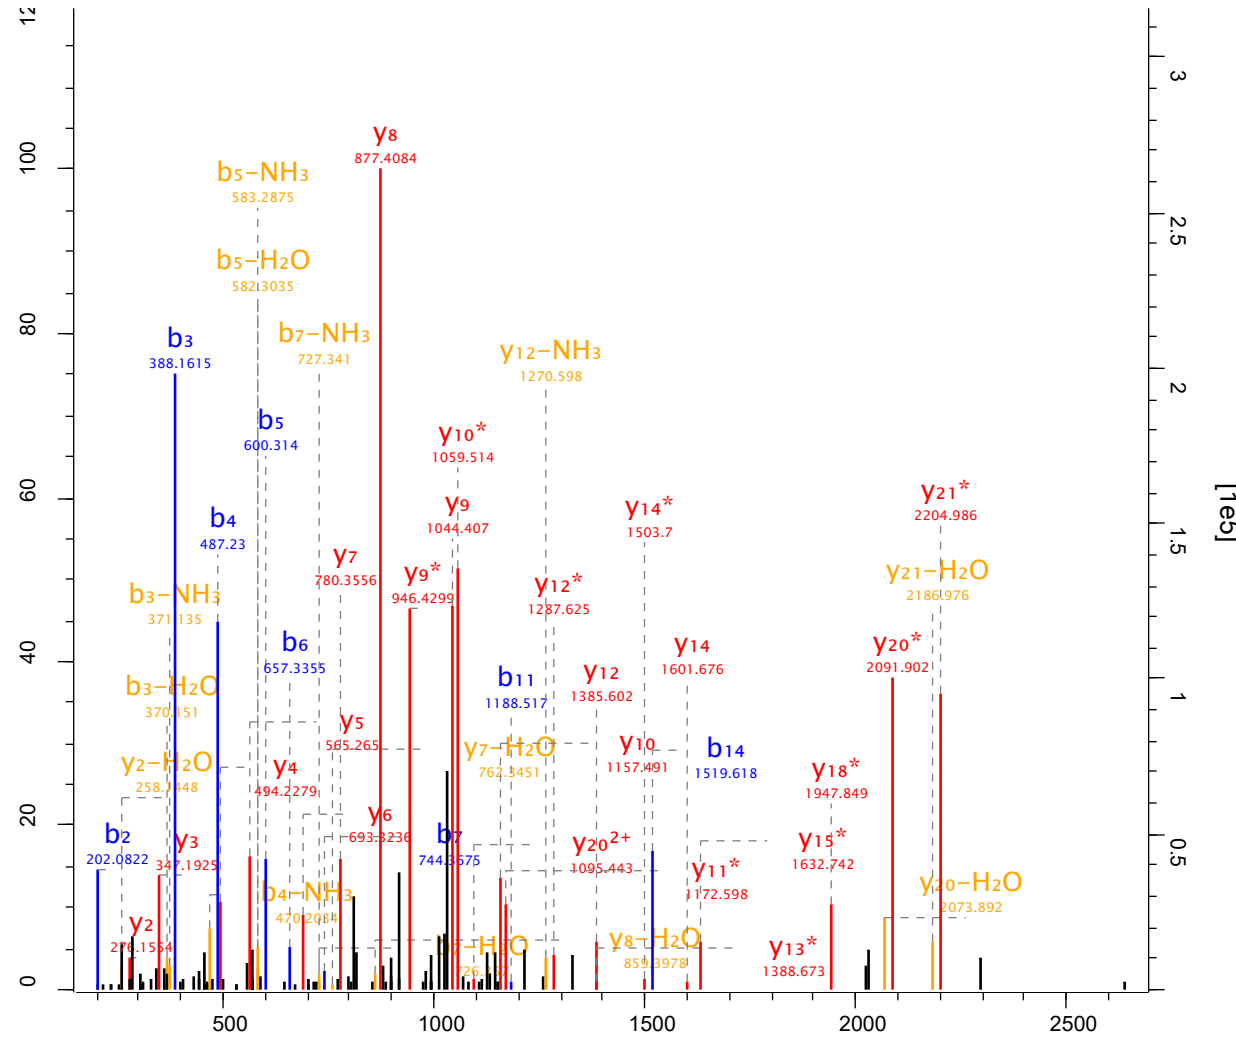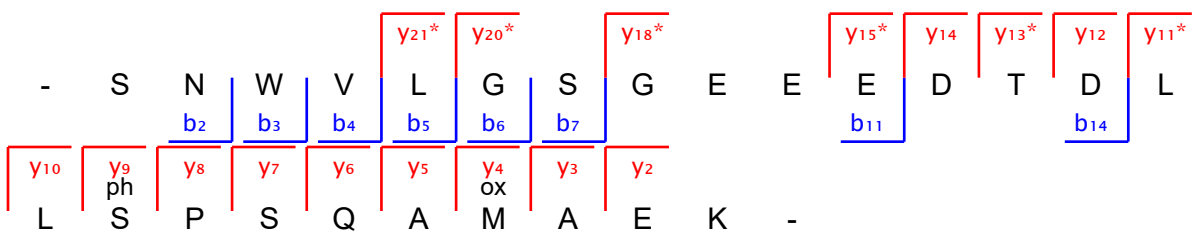

Raw file Scan Method Score m/z  
 sys\_15\_1 4031 FTMS; HCD 160.44 578.74

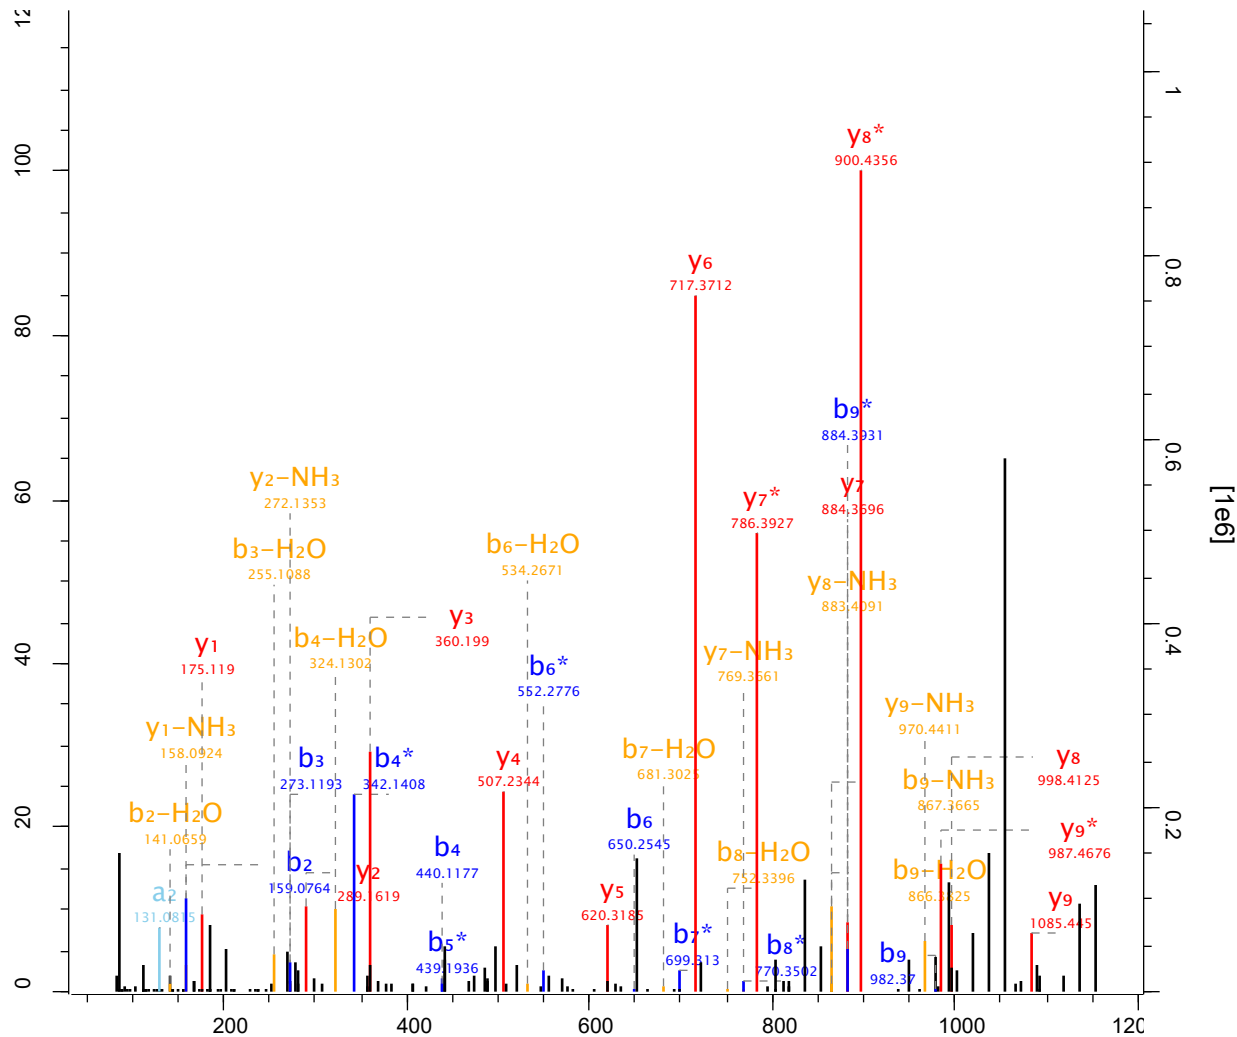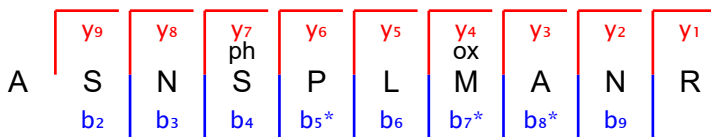



Raw file Scan Method Score m/z  
 sys\_15\_1 40941 FTMS; HCD 42 740.36

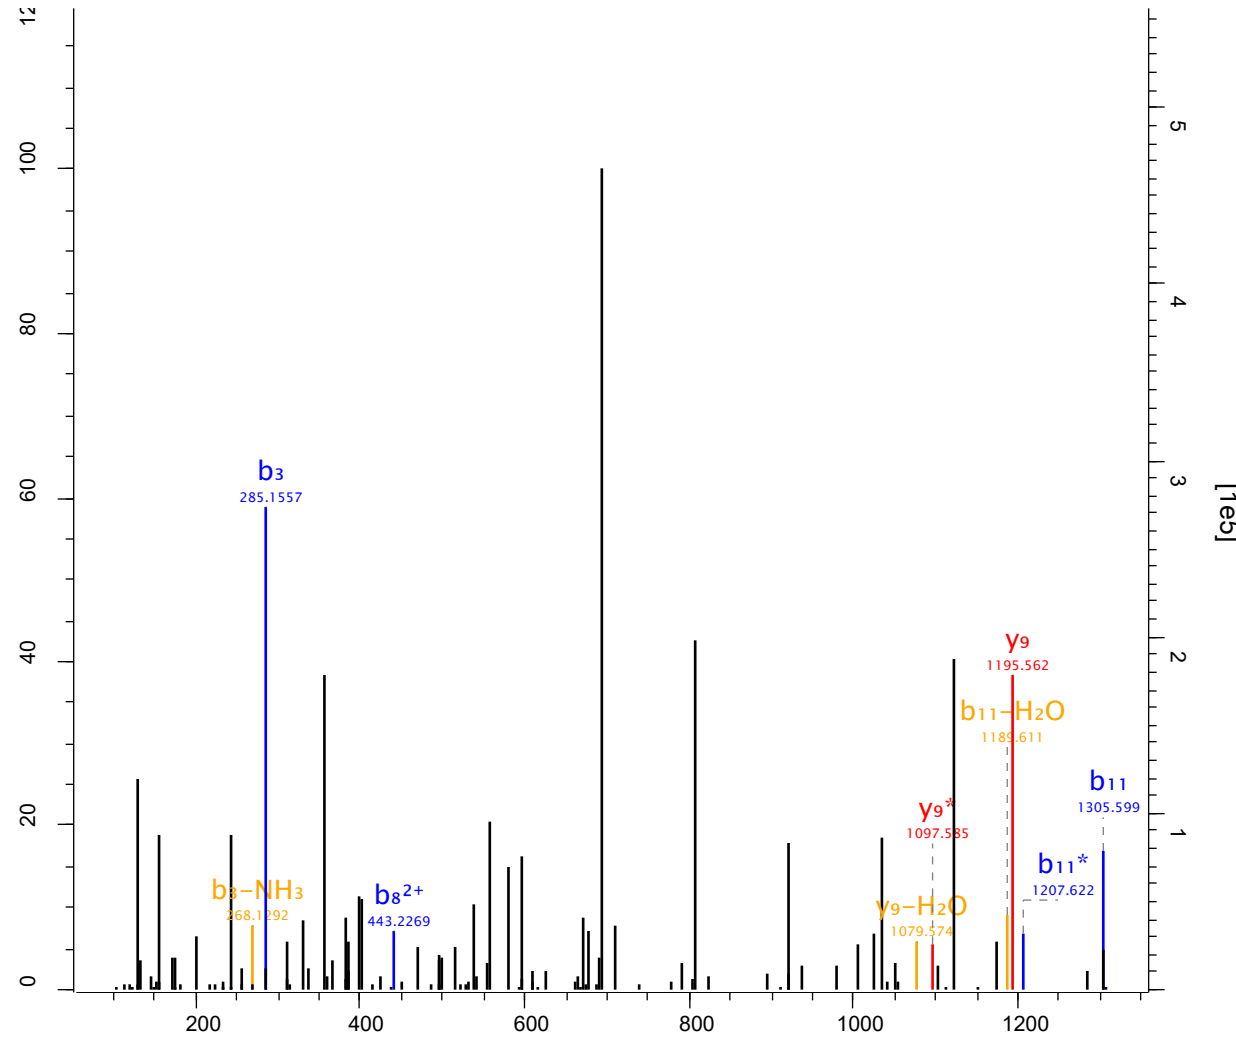

- N G L F N E P I R P S R -  
 (ph above S)  
 b<sub>3</sub> (under L), y<sub>9</sub> (above F), b<sub>8</sub><sup>2+</sup> (under I), b<sub>11</sub> (under S)

Raw file Scan Method Score m/z  
 sys\_15\_1 41018 FTMS; HCD 154.48 847.4

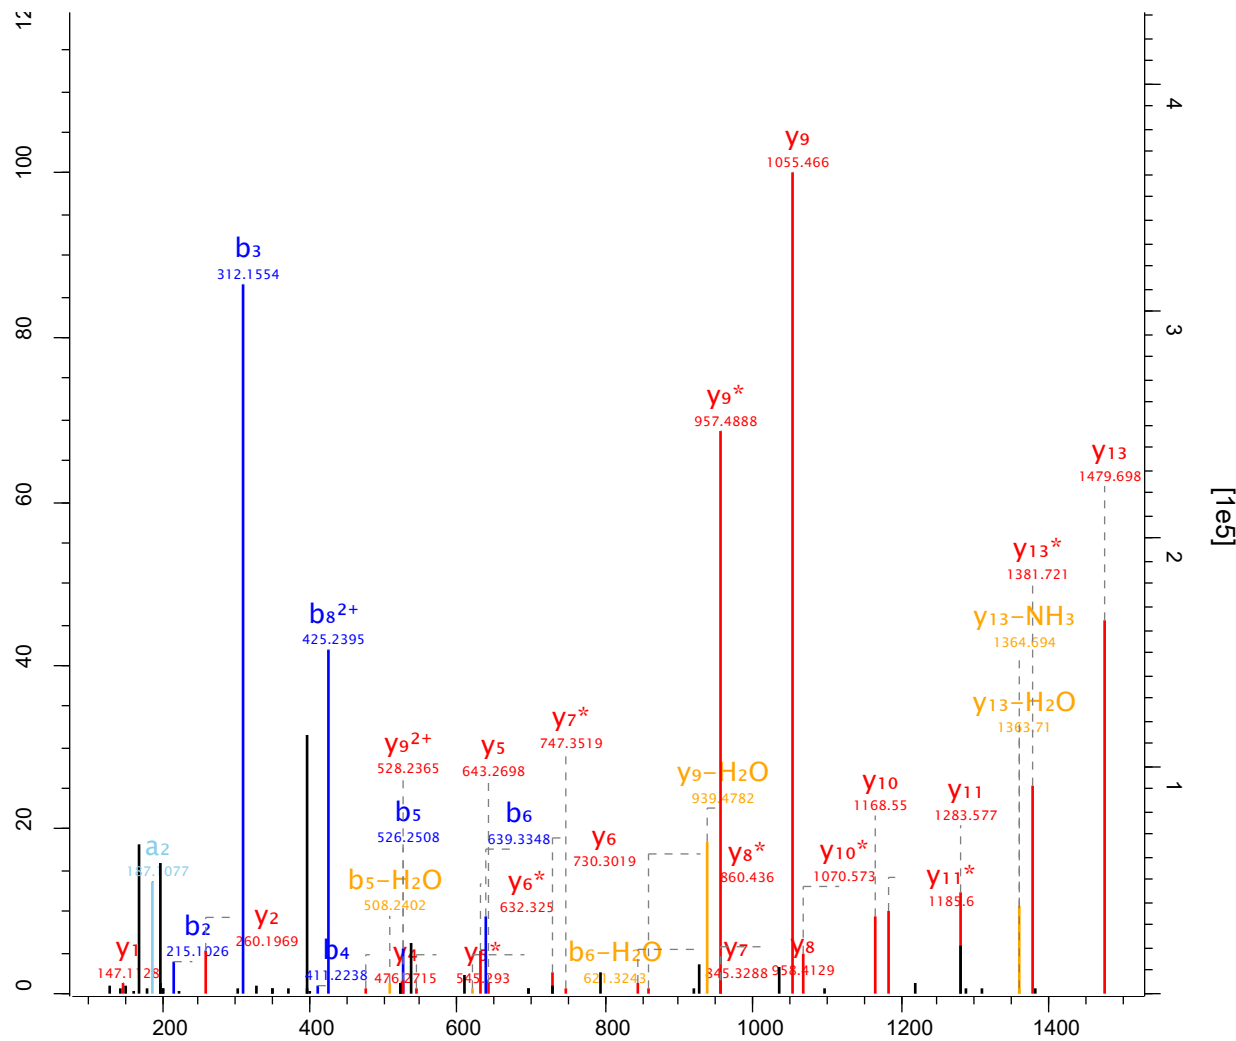

- D V P V D I P L D S S ph S T D L K  
 b<sub>2</sub> b<sub>3</sub> b<sub>4</sub> b<sub>5</sub> b<sub>6</sub> b<sub>8</sub><sup>2+</sup> y<sub>13</sub> y<sub>11</sub> y<sub>10</sub> y<sub>9</sub> y<sub>8</sub> y<sub>7</sub> y<sub>6</sub> y<sub>5</sub> y<sub>4</sub> y<sub>2</sub> y<sub>1</sub>

Raw file Scan Method Score m/z  
 sys\_15\_1 41058 FTMS; HCD 72.43 816.35

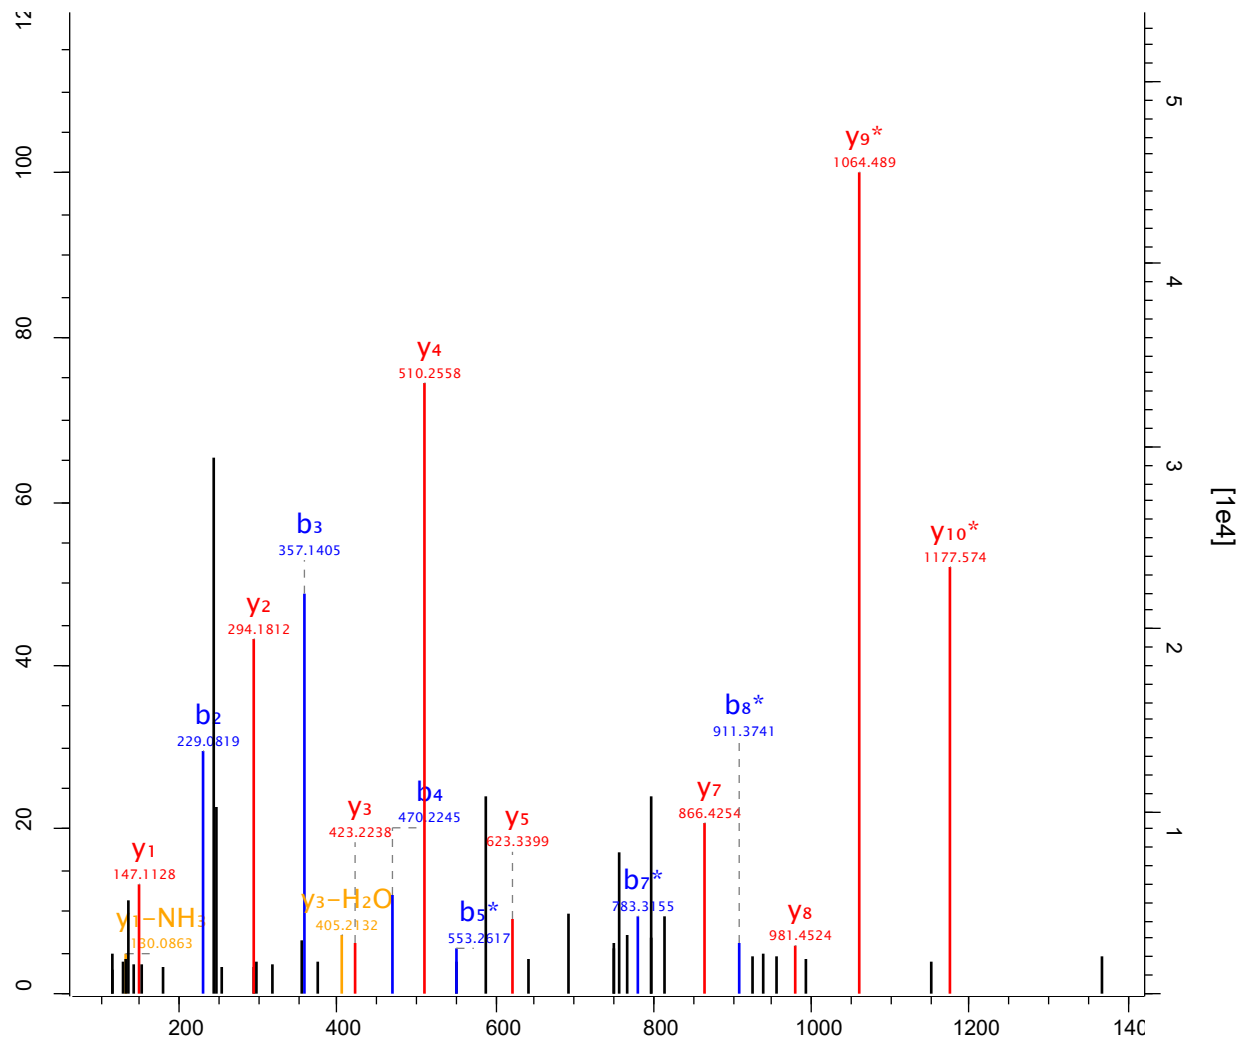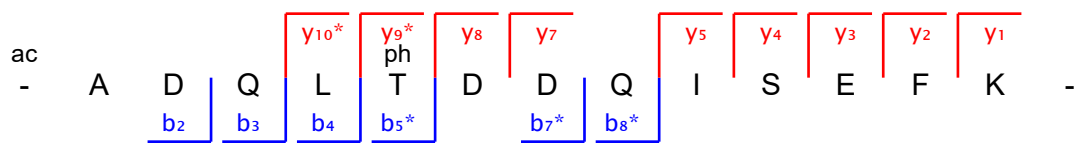

Raw file Scan Method Score m/z  
 sys\_15\_1 41078 FTMS; HCD 96.79 800.41

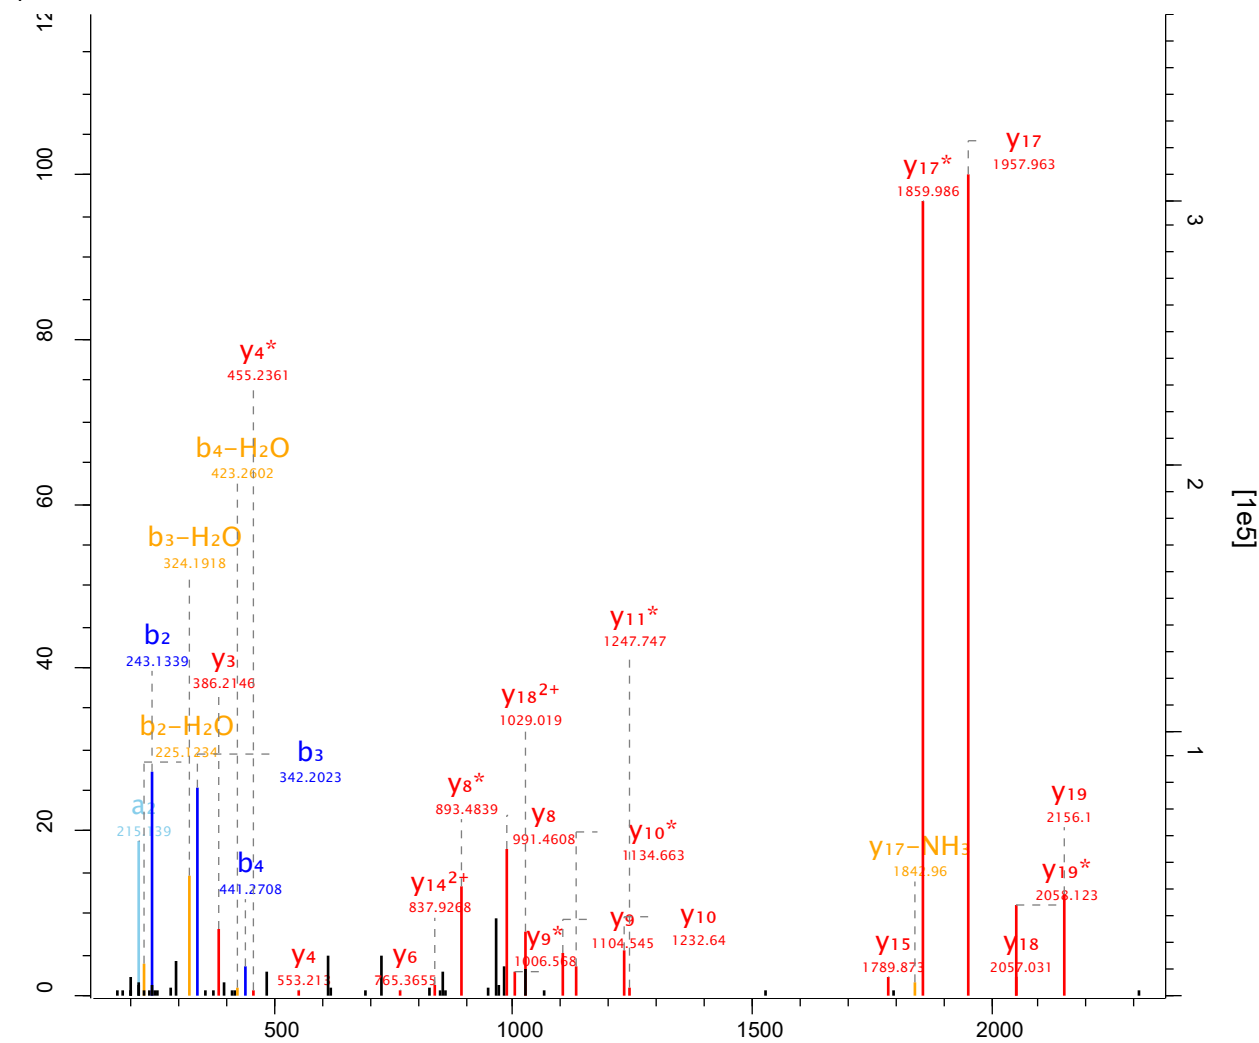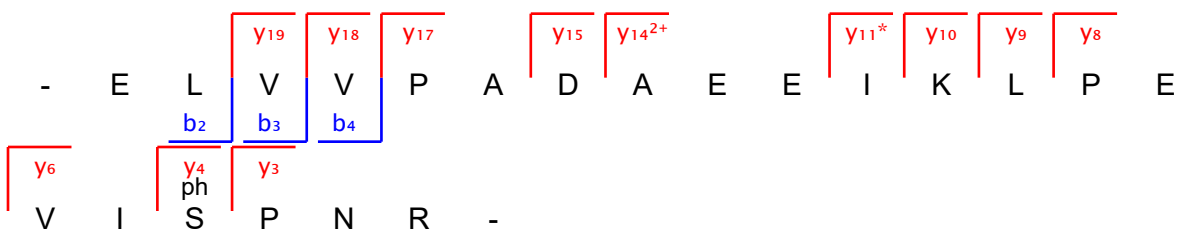

Raw file Scan Method Score m/z  
 sys\_15\_1 41706 FTMS; HCD 68.58 1056.79

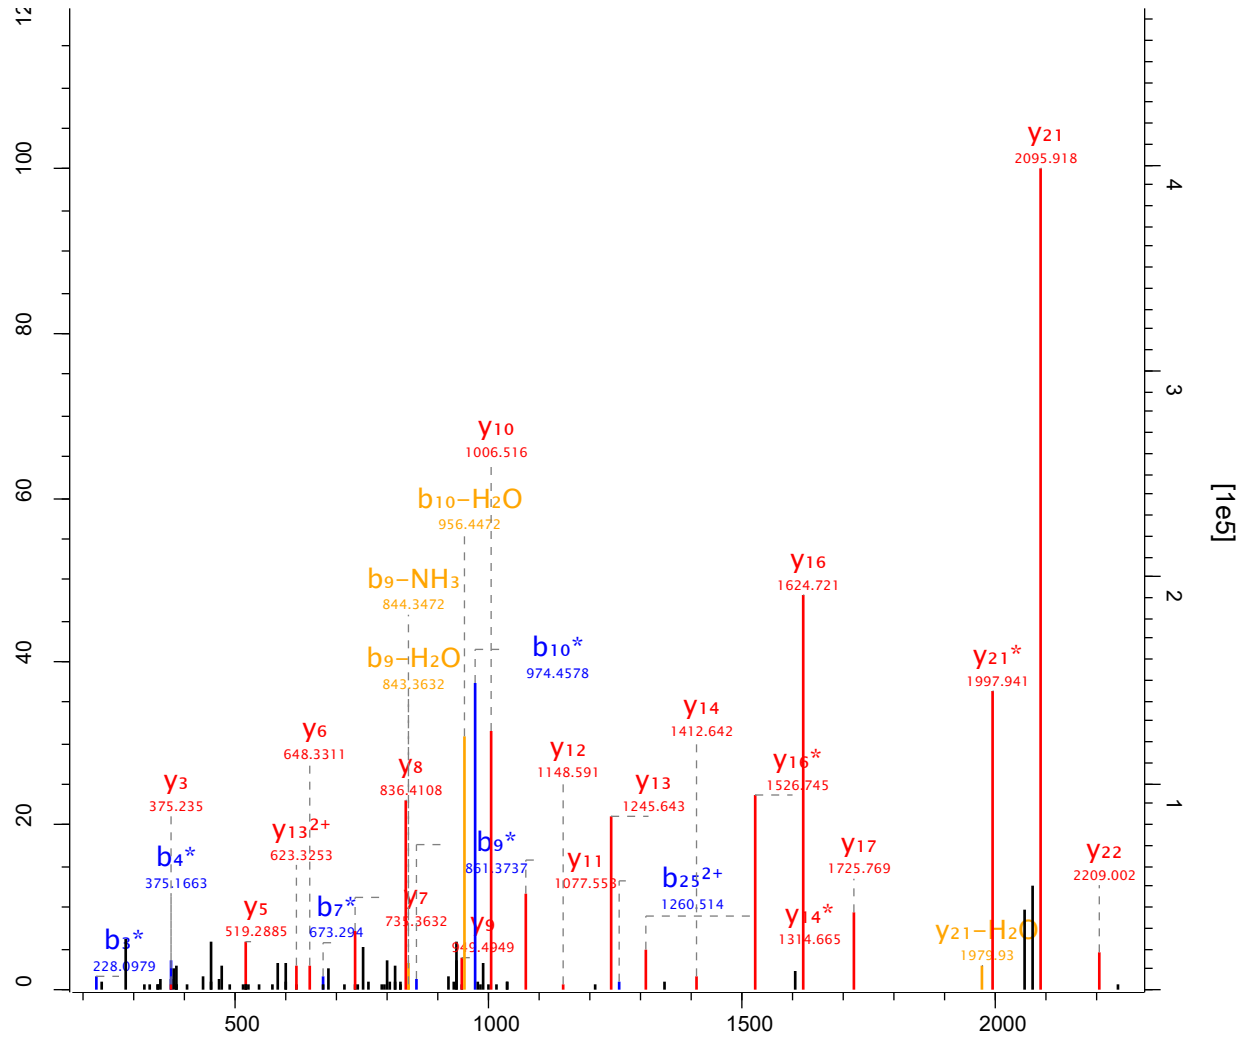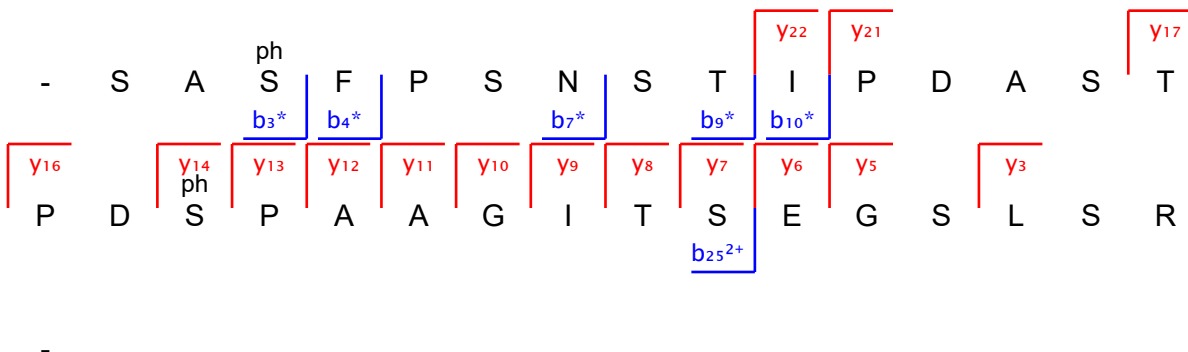

Raw file Scan Method Score m/z  
 sys\_15\_1 41892 FTMS; HCD 107.21 978

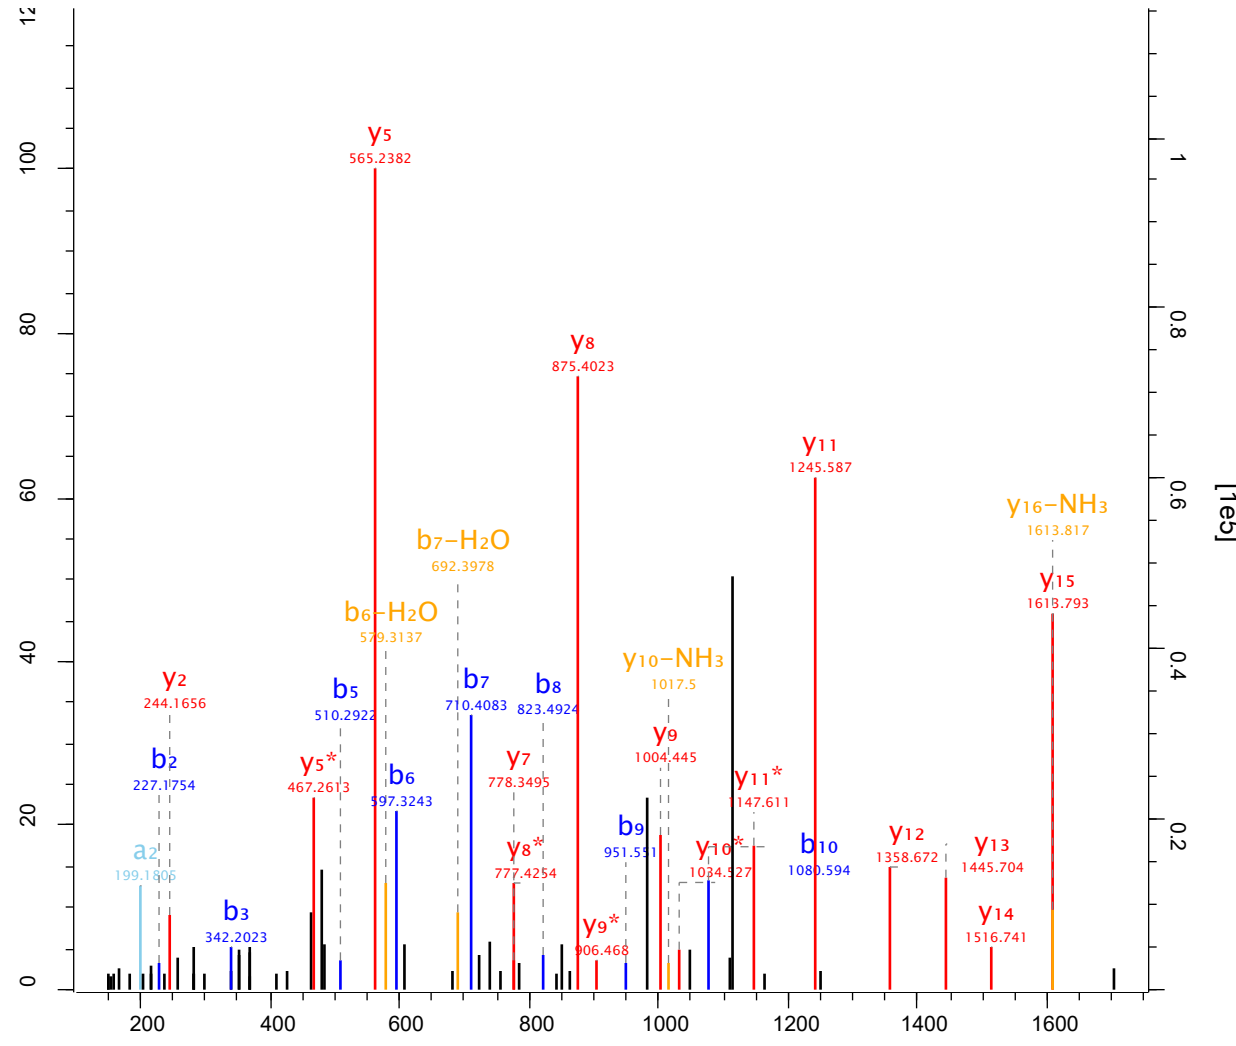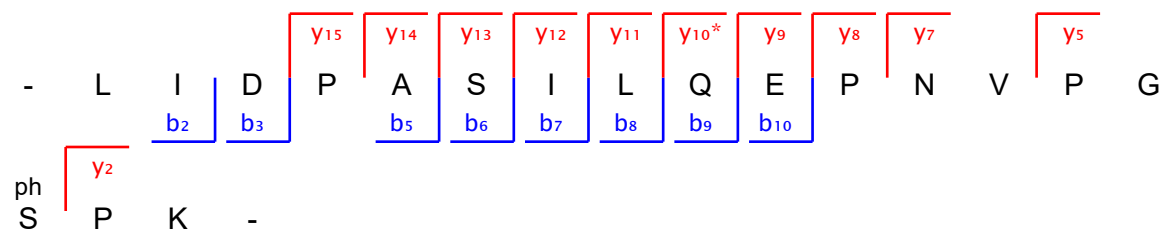

Raw file Scan Method Score m/z  
 sys\_15\_1 4205 FTMS; HCD 102.73 570.76

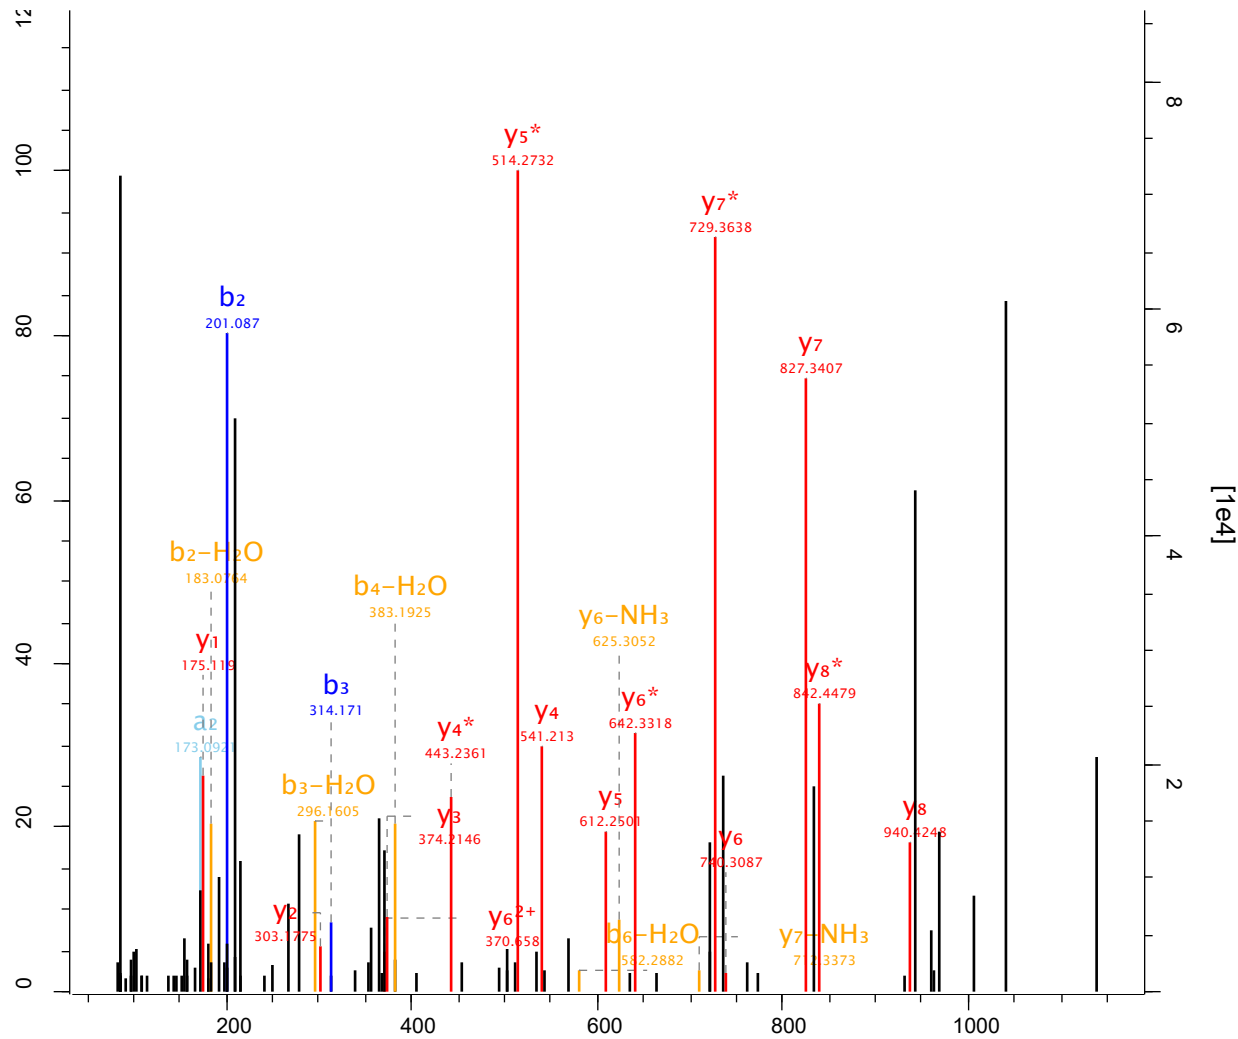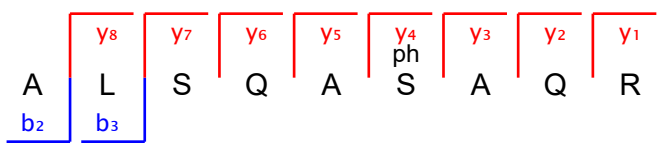

Raw file Scan Method Score m/z  
 sys\_15\_1 4227 FTMS; HCD 68.04 580.72

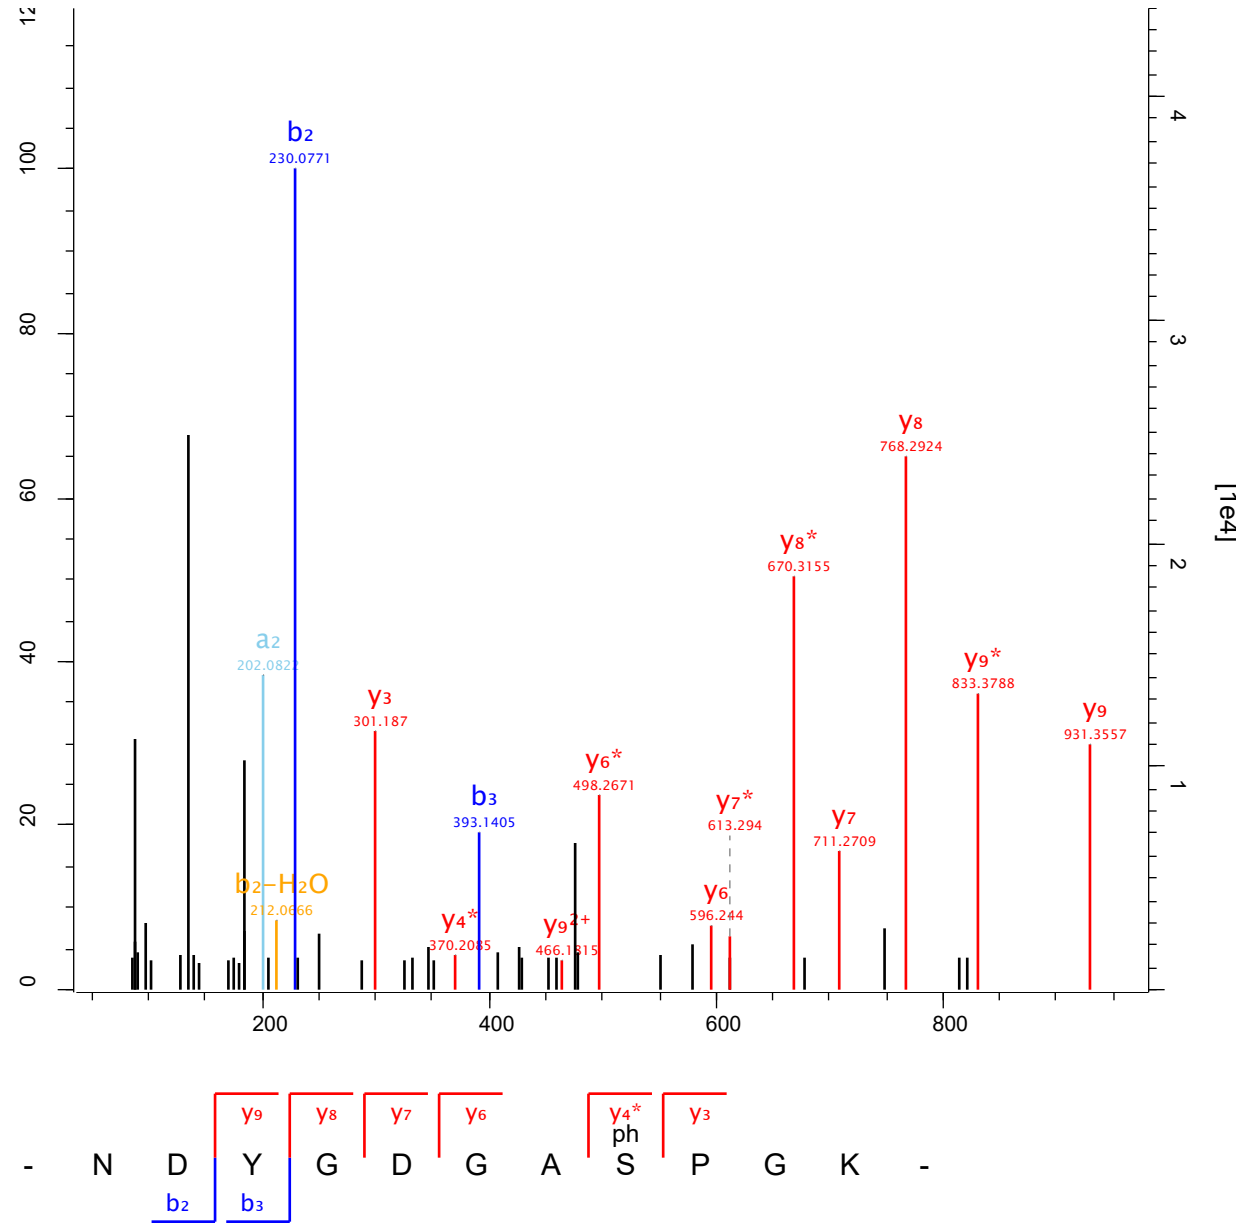

N

D

Y

G

D

G

A

S

P

G

K

-

b<sub>2</sub>

b<sub>3</sub>

y<sub>9</sub>

y<sub>8</sub>

y<sub>7</sub>

y<sub>6</sub>

y<sub>4</sub><sup>\*</sup>

y<sub>3</sub>

b<sub>2</sub>-H<sub>2</sub>O  
212.0666

b<sub>2</sub>  
230.0771

a<sub>2</sub>  
202.0822

y<sub>3</sub>  
301.187

y<sub>4</sub><sup>\*</sup>  
370.2065

b<sub>3</sub>  
393.1405

y<sub>9</sub><sup>2+</sup>  
466.1815

y<sub>6</sub><sup>\*</sup>  
498.2671

y<sub>7</sub><sup>\*</sup>  
613.294

y<sub>6</sub>  
596.244

y<sub>8</sub><sup>\*</sup>  
670.3155

y<sub>7</sub>  
711.2709

y<sub>8</sub>  
768.2924

y<sub>9</sub><sup>\*</sup>  
833.3788

y<sub>9</sub>  
931.3557

[1e4]



Raw file Scan Method Score m/z  
 sys\_15\_1 42328 FTMS; HCD 134.26 771.75

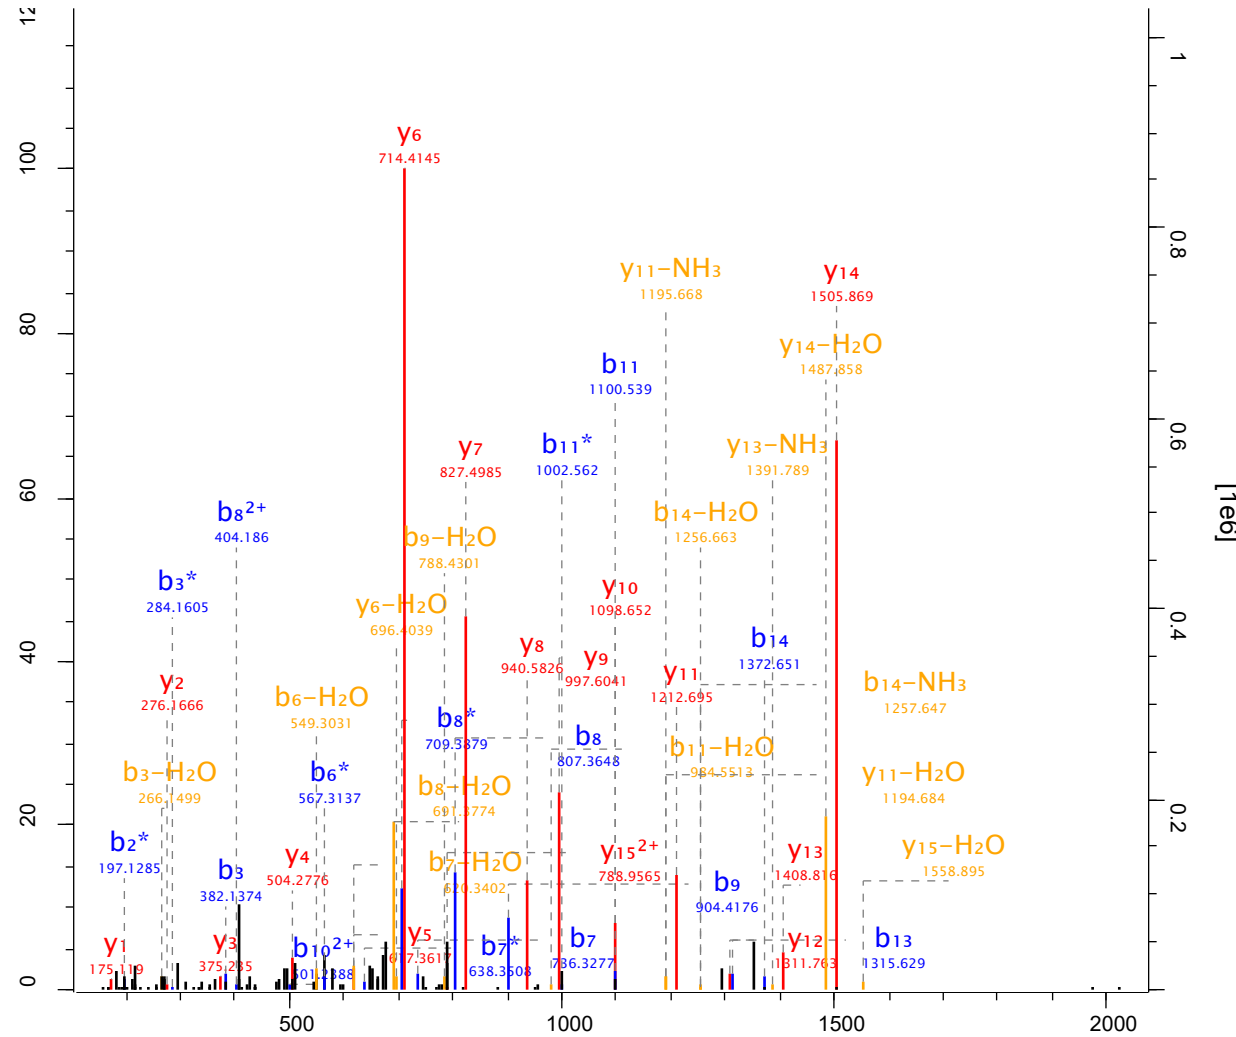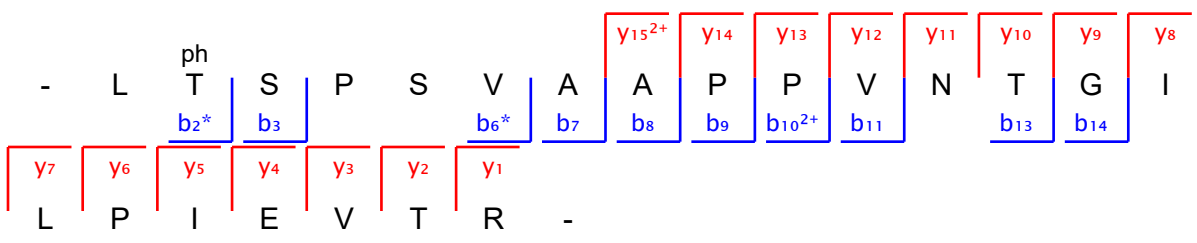

Raw file Scan Method Score m/z  
 sys\_15\_1 4244 FTMS; HCD 49.3 549.23

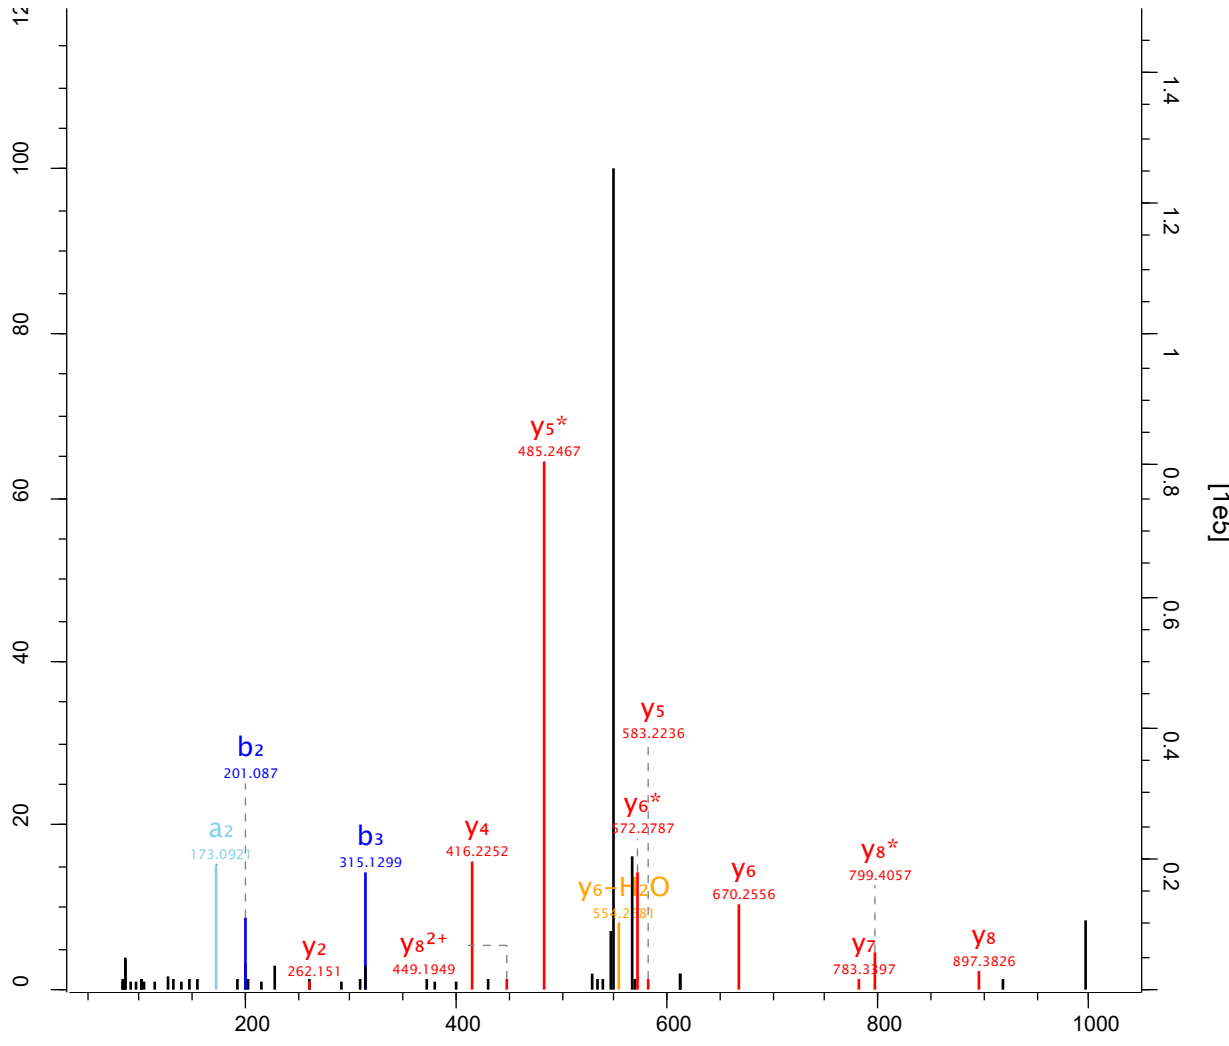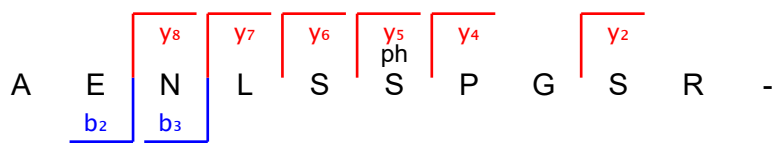

Raw file Scan Method Score m/z  
 sys\_15\_1 4256 FTMS; HCD 43.59 688.26

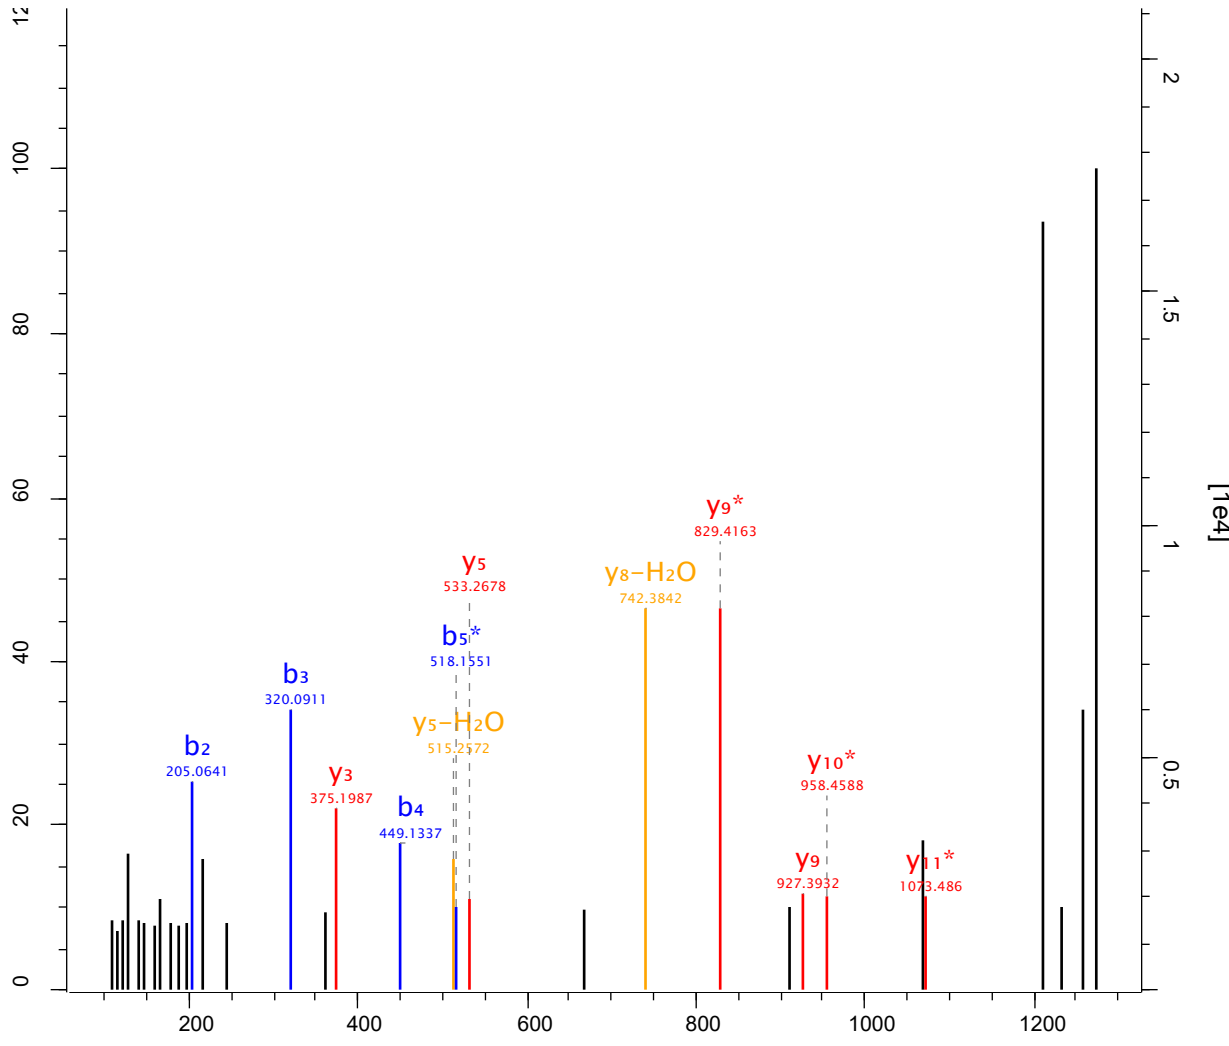

ox  
 - M G D E S G G L S A N N K -

b<sub>2</sub>
b<sub>3</sub>
b<sub>4</sub>
b<sub>5</sub><sup>\*</sup>
y<sub>11</sub><sup>\*</sup>
y<sub>10</sub><sup>\*</sup>
y<sub>9</sub><sup>ph</sup>
y<sub>5</sub>
y<sub>3</sub>

Raw file Scan Method Score m/z  
 sys\_15\_1 42613 FTMS; HCD 63.14 710.01

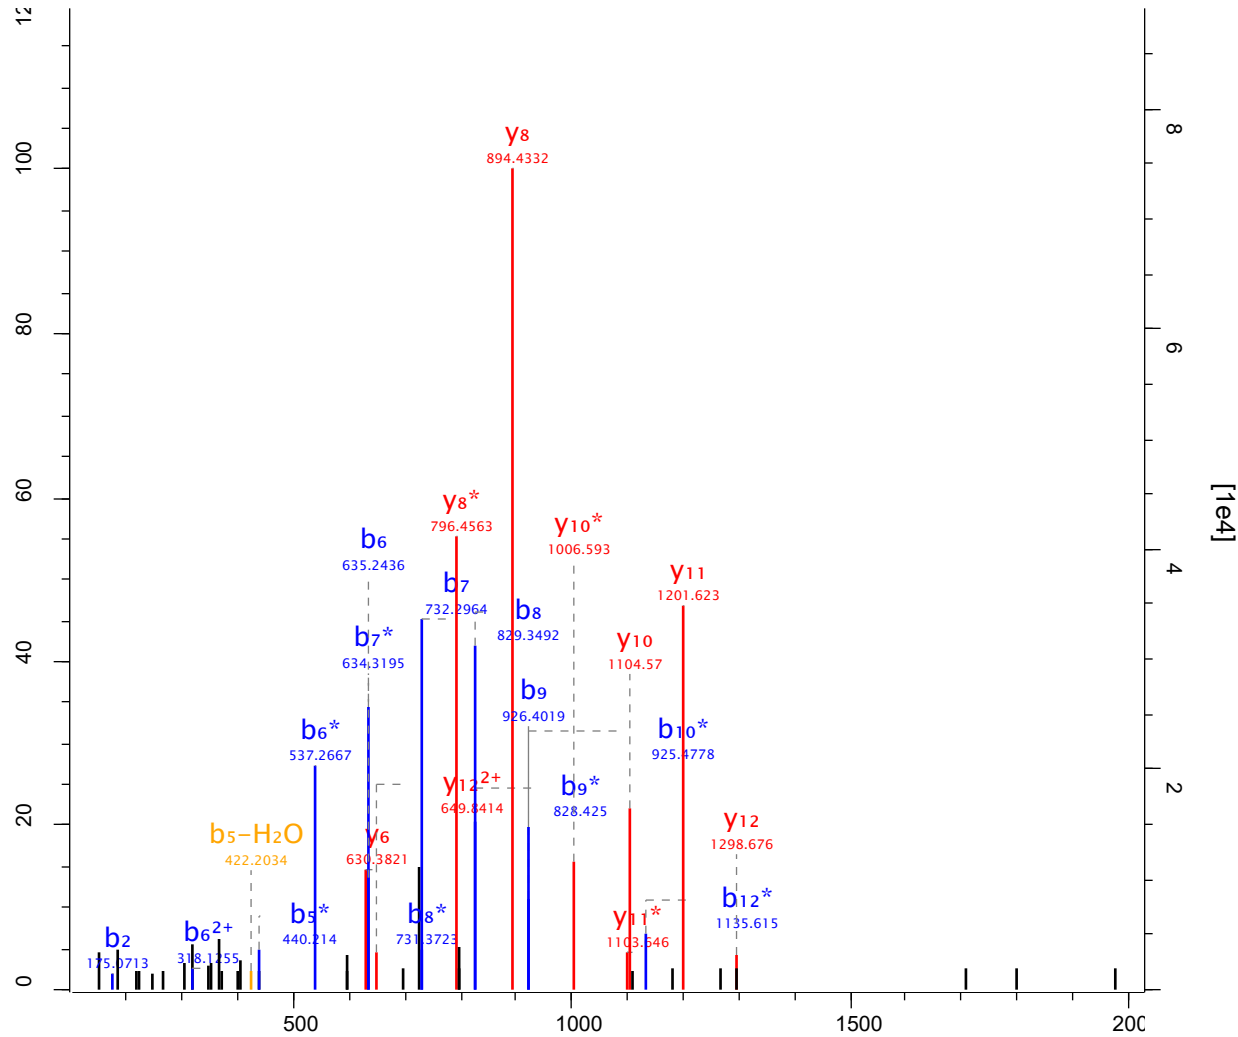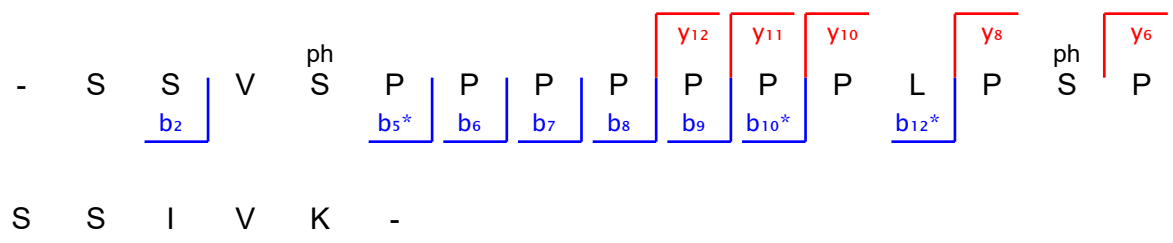

Raw file Scan Method Score m/z  
 sys\_15\_1 4294 FTMS; HCD 81.79 645.76

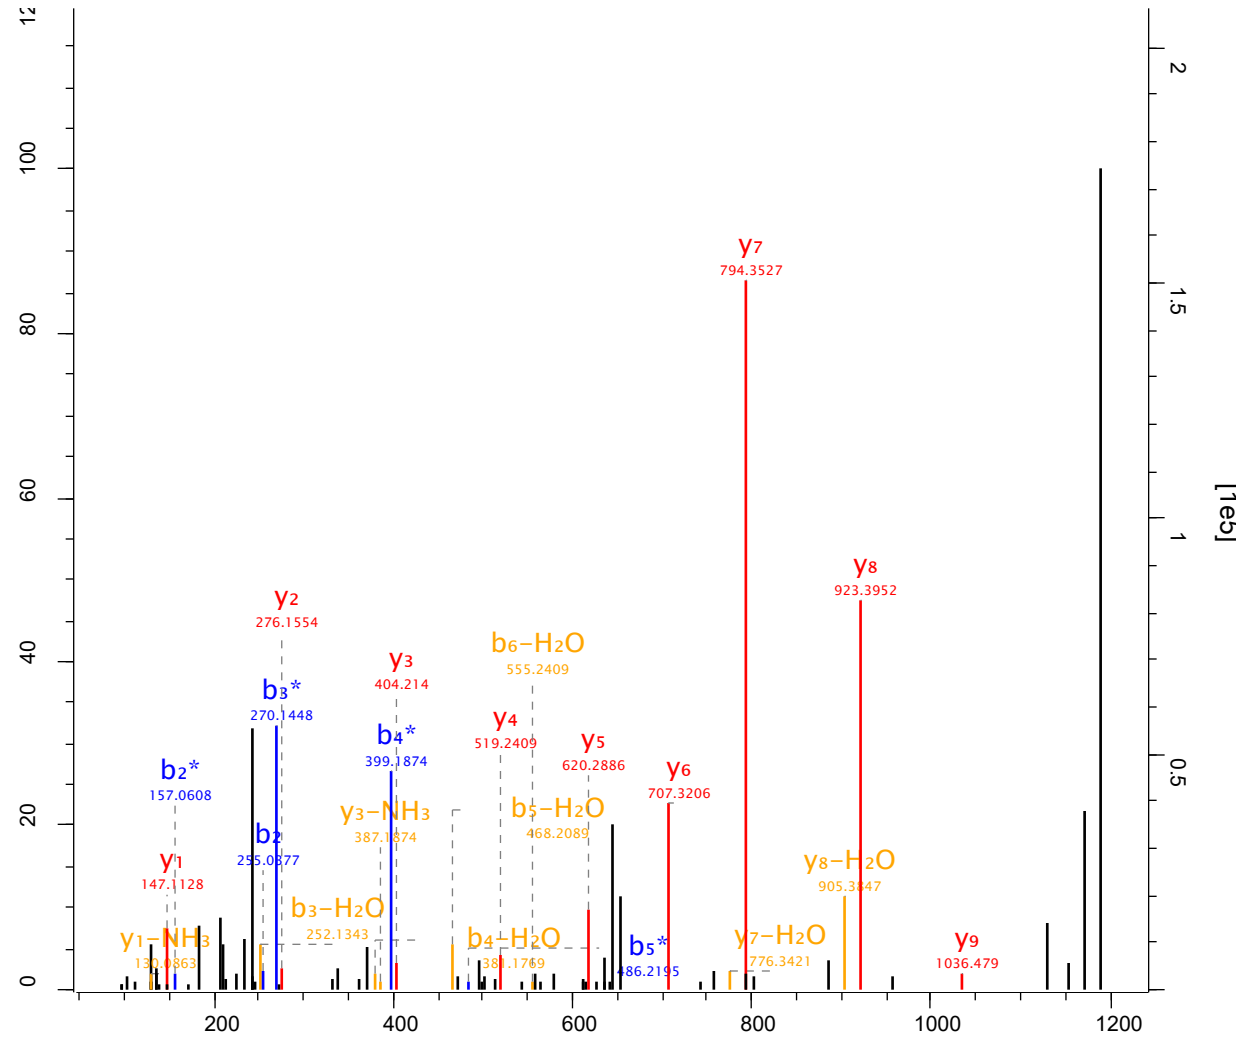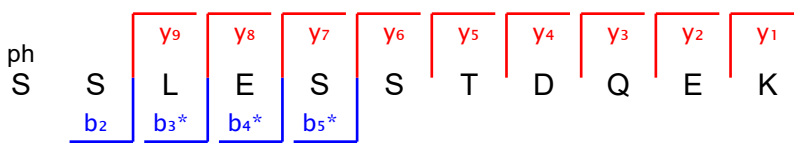

Raw file Scan Method Score m/z  
 sys\_15\_1 42954 FTMS; HCD 74.3 770.83

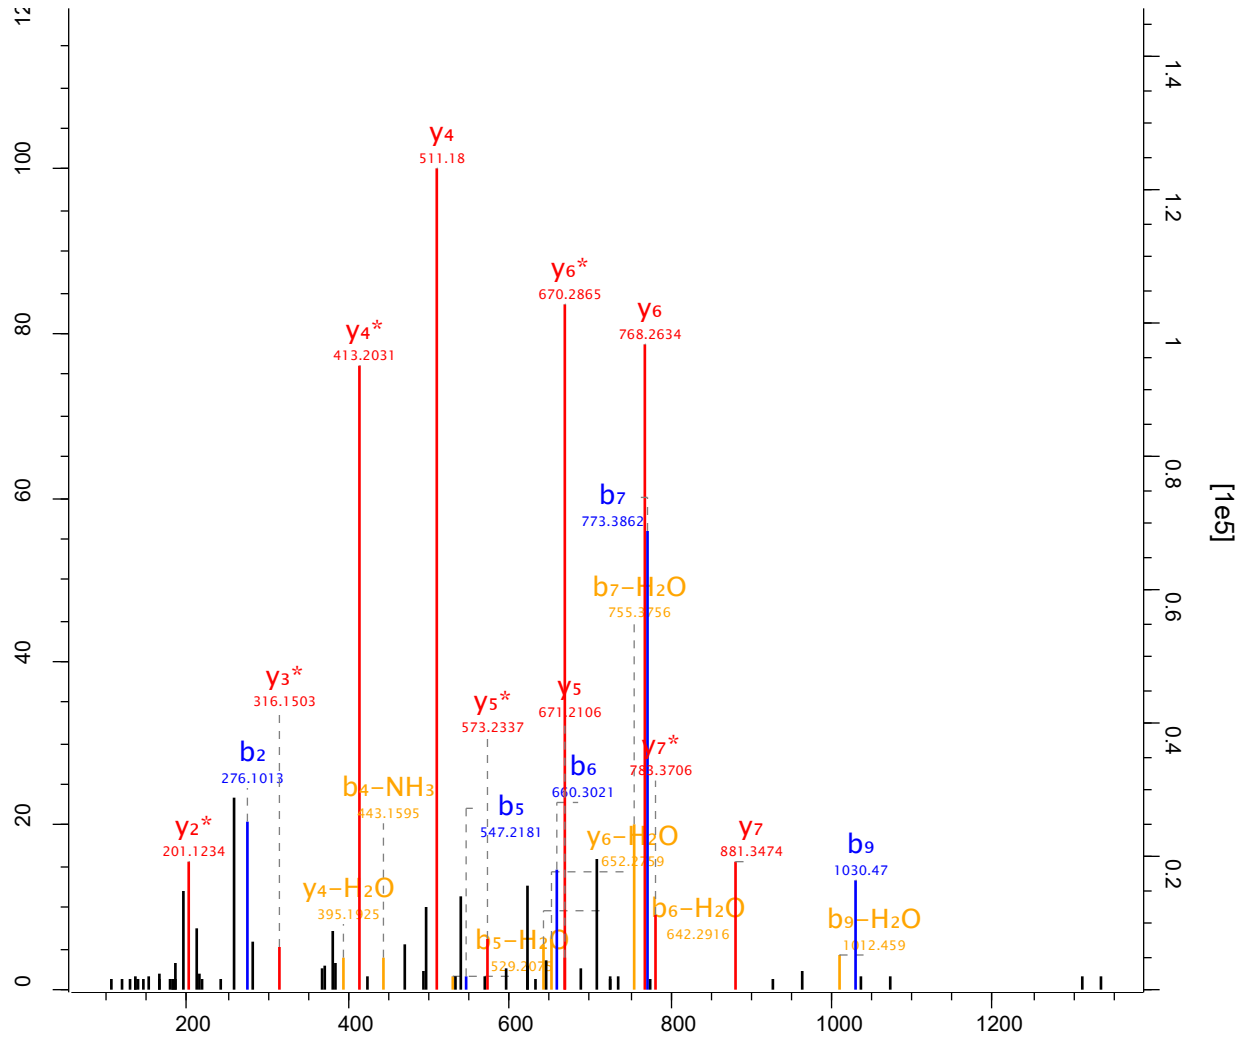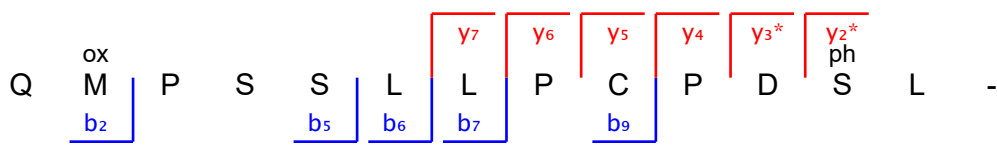

Raw file Scan Method Score m/z  
 sys\_15\_1 43087 FTMS; HCD 178.32 1002.41

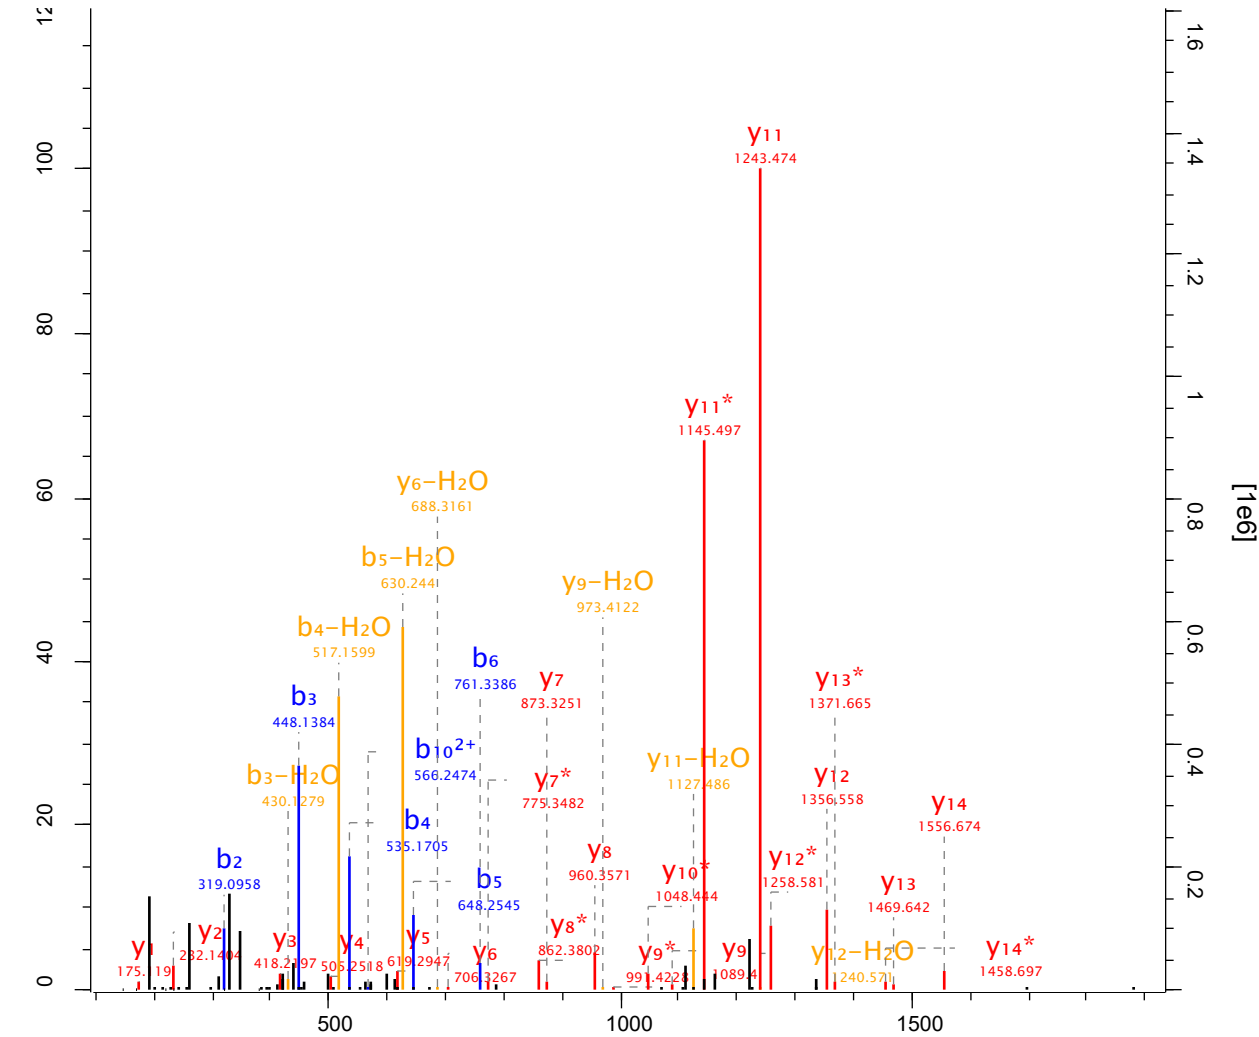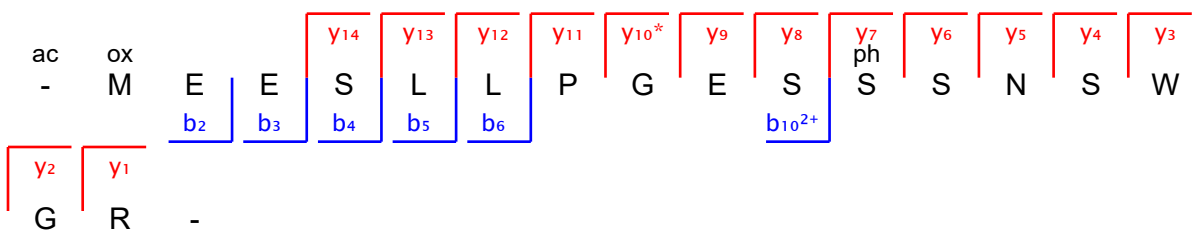

Raw file Scan Method Score m/z  
 sys\_15\_1 4332 FTMS; HCD 80.69 563.2

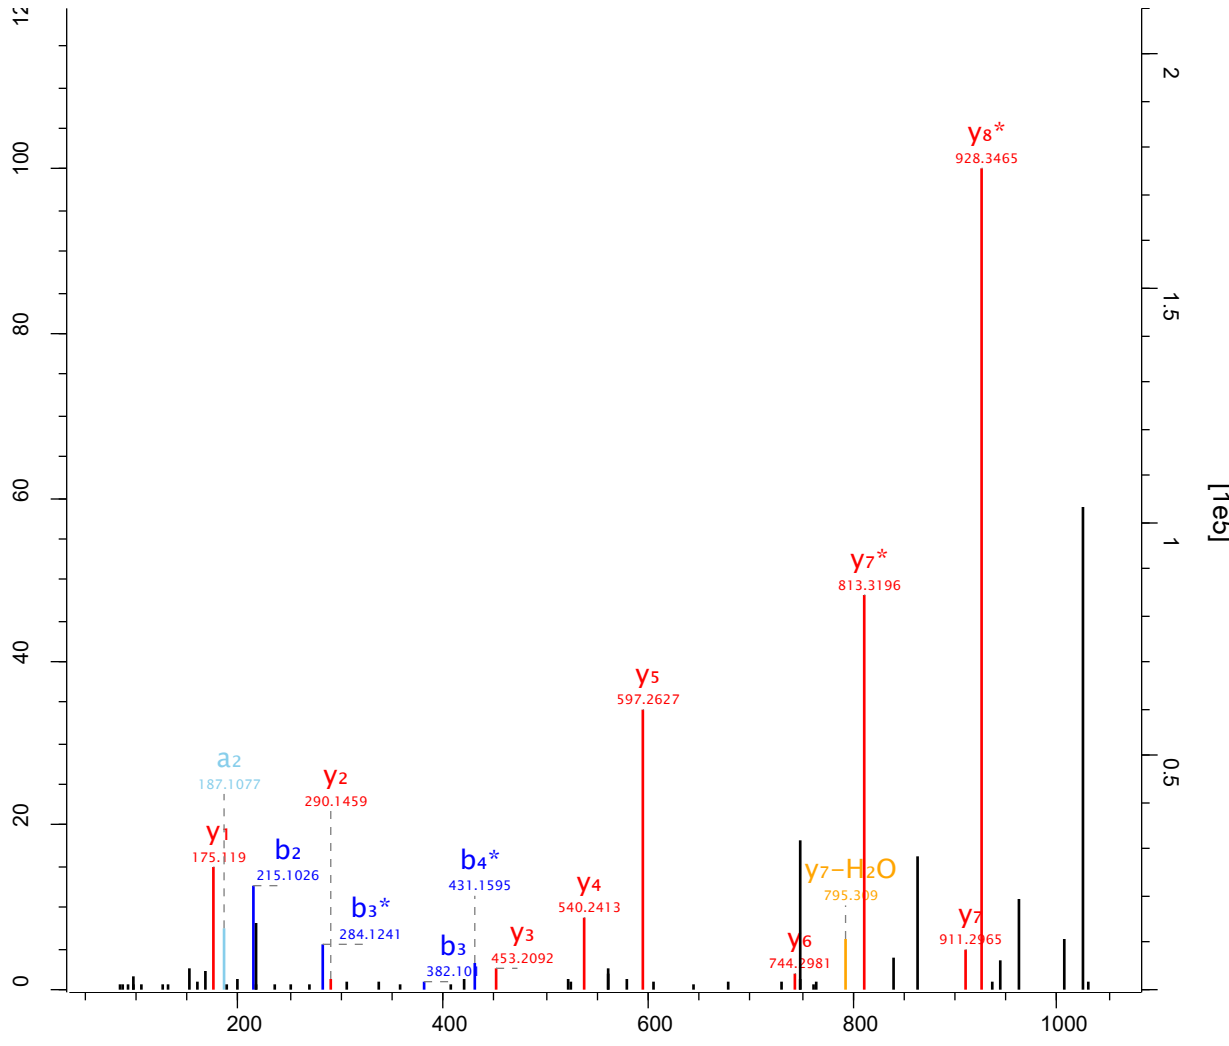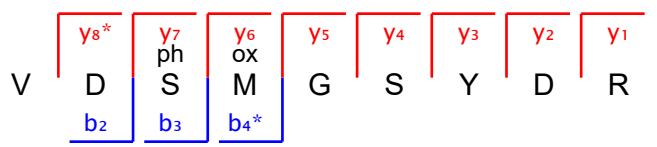



Raw file Scan Method Score m/z  
 sys\_15\_1 4338 FTMS; HCD 90.61 548.74

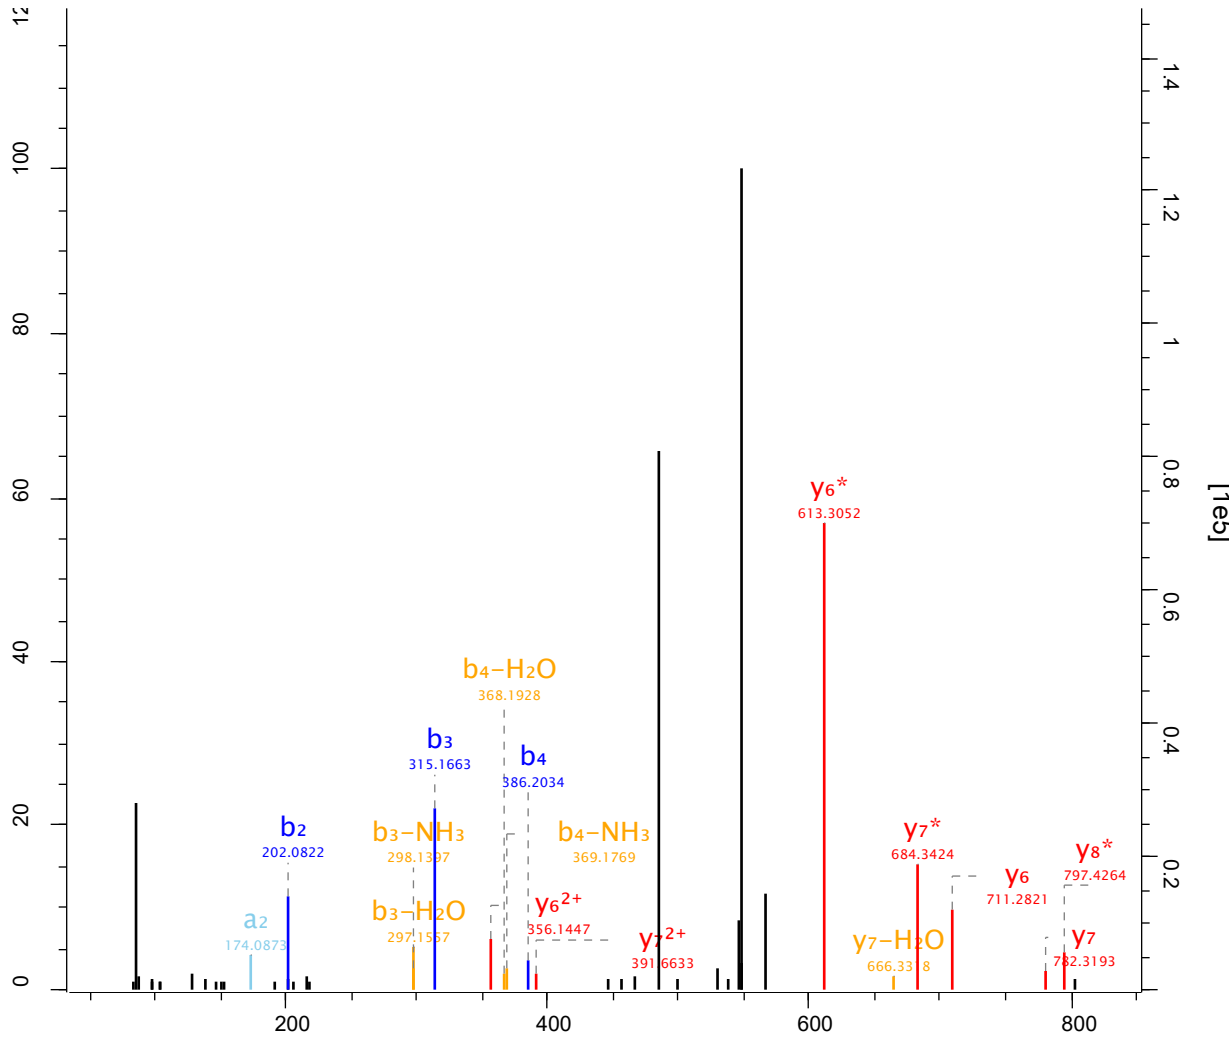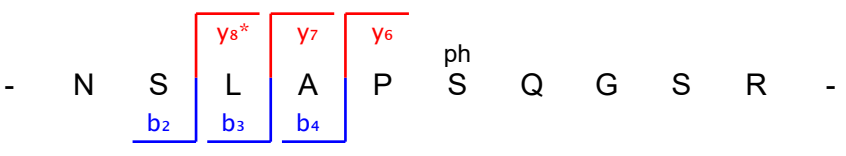

Raw file Scan Method Score m/z  
 sys\_15\_1 43423 FTMS; HCD 142.45 847.06

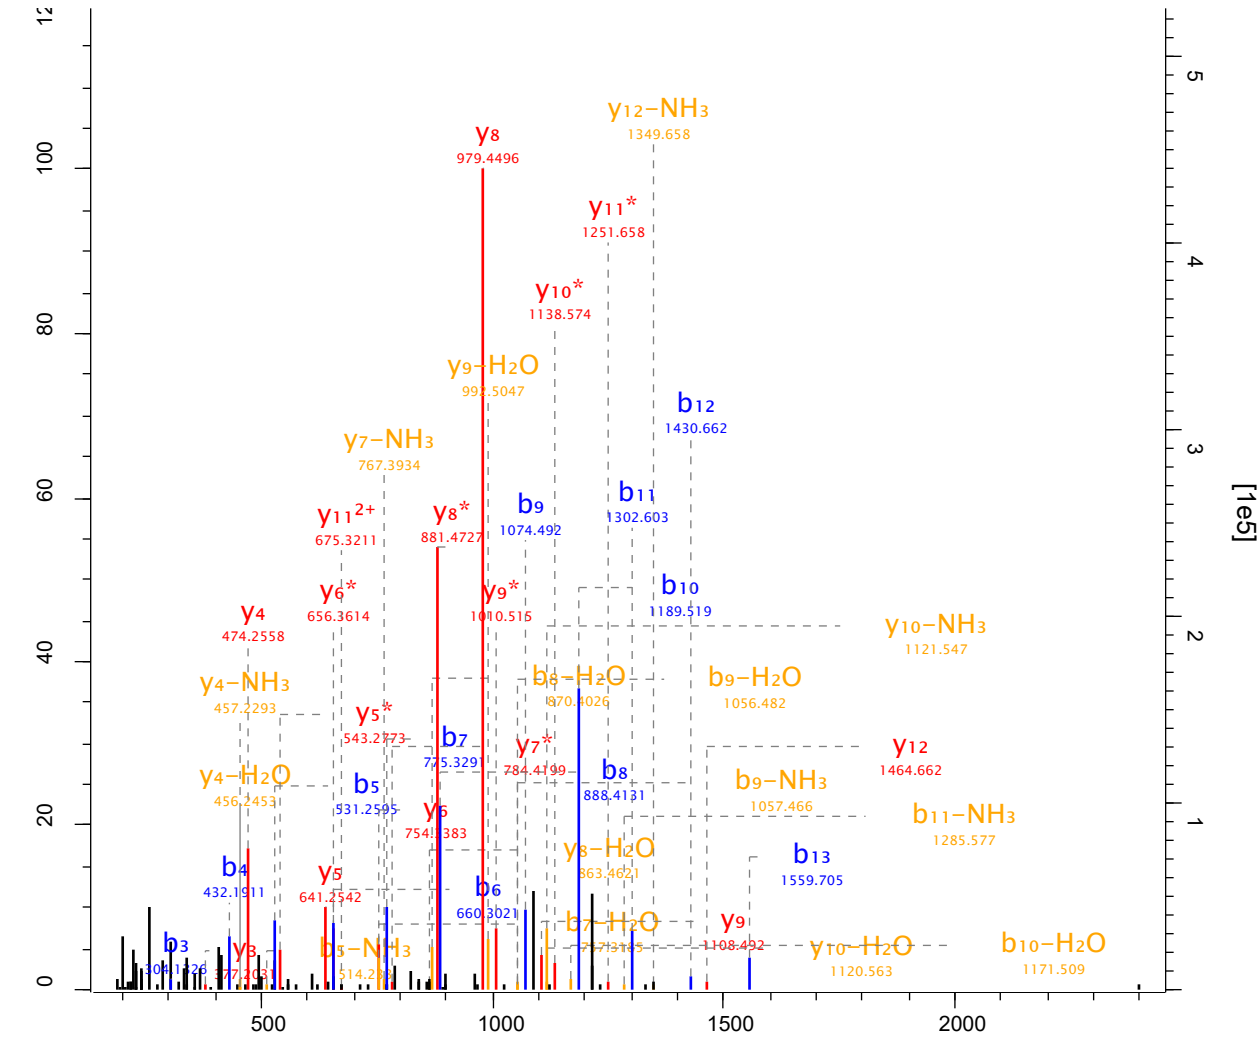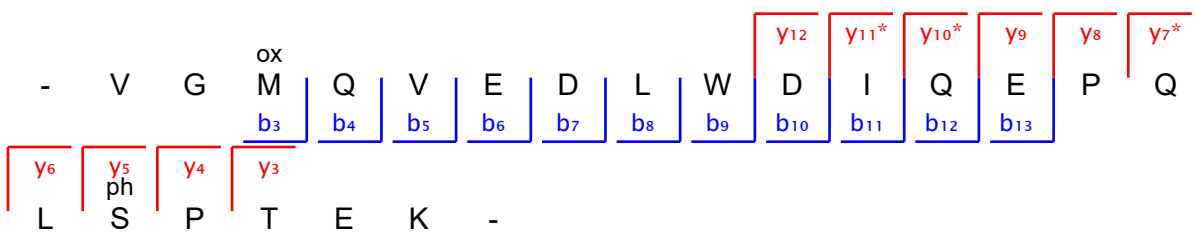

Raw file Scan Method Score m/z  
 sys\_15\_1 44236 FTMS; HCD 120.84 801.76

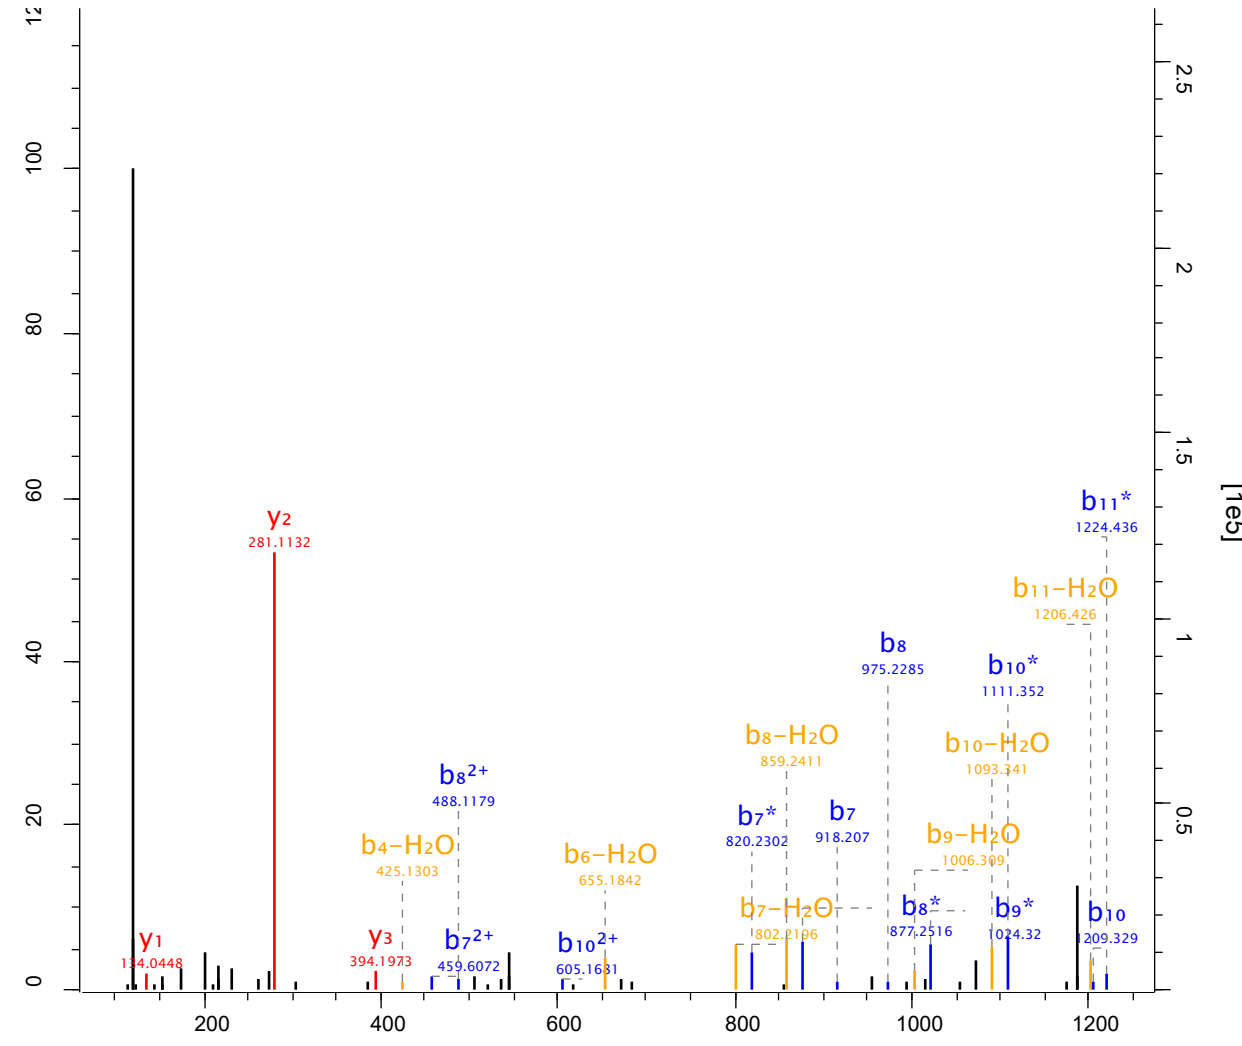

- E E S D D D ox M G F S L F D -

Fragmentation mapping (blue boxes): b7, b8, b9\*, b10, b11\*

Fragmentation mapping (red boxes): y3, y2, y1

Raw file Scan Method Score m/z  
 sys\_15\_1 44495 FTMS; HCD 157.5 1014.13

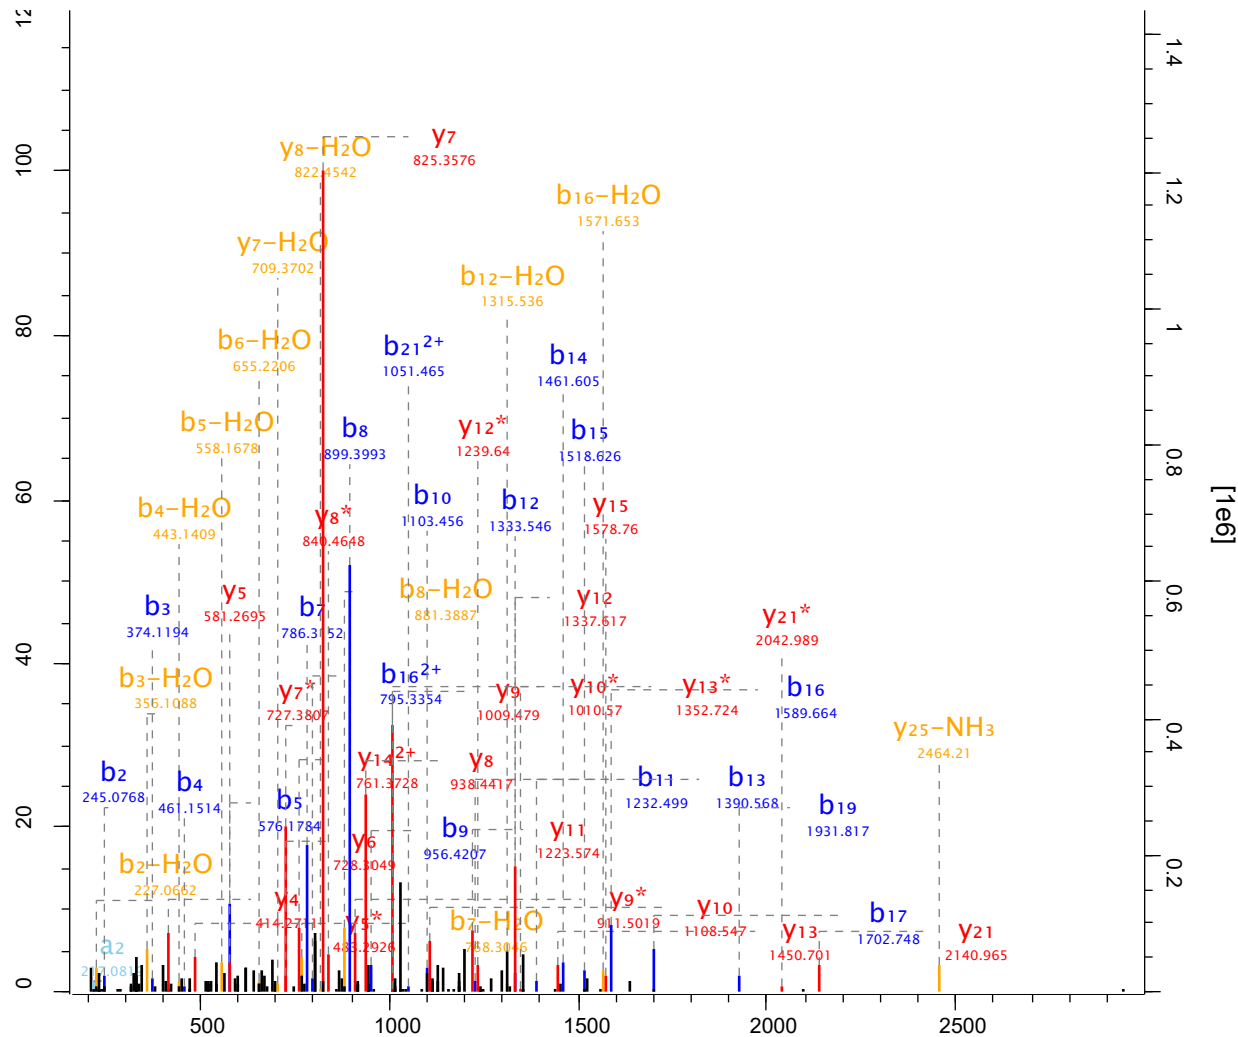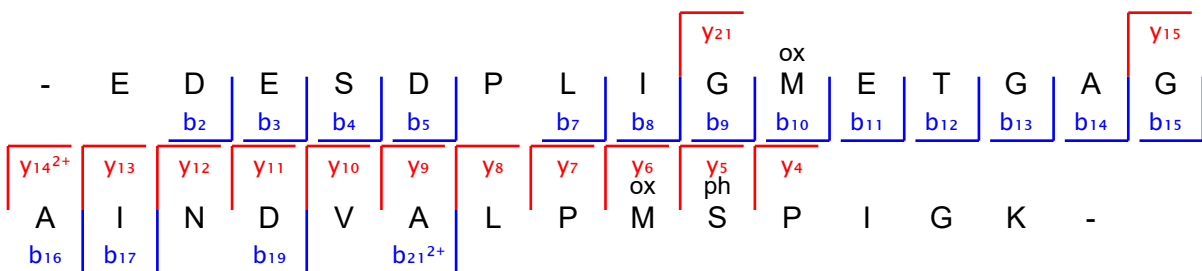

| Raw file | Scan | Method    | Score  | m/z    |
|----------|------|-----------|--------|--------|
| sys_15_1 | 4501 | FTMS; HCD | 101.71 | 543.21 |

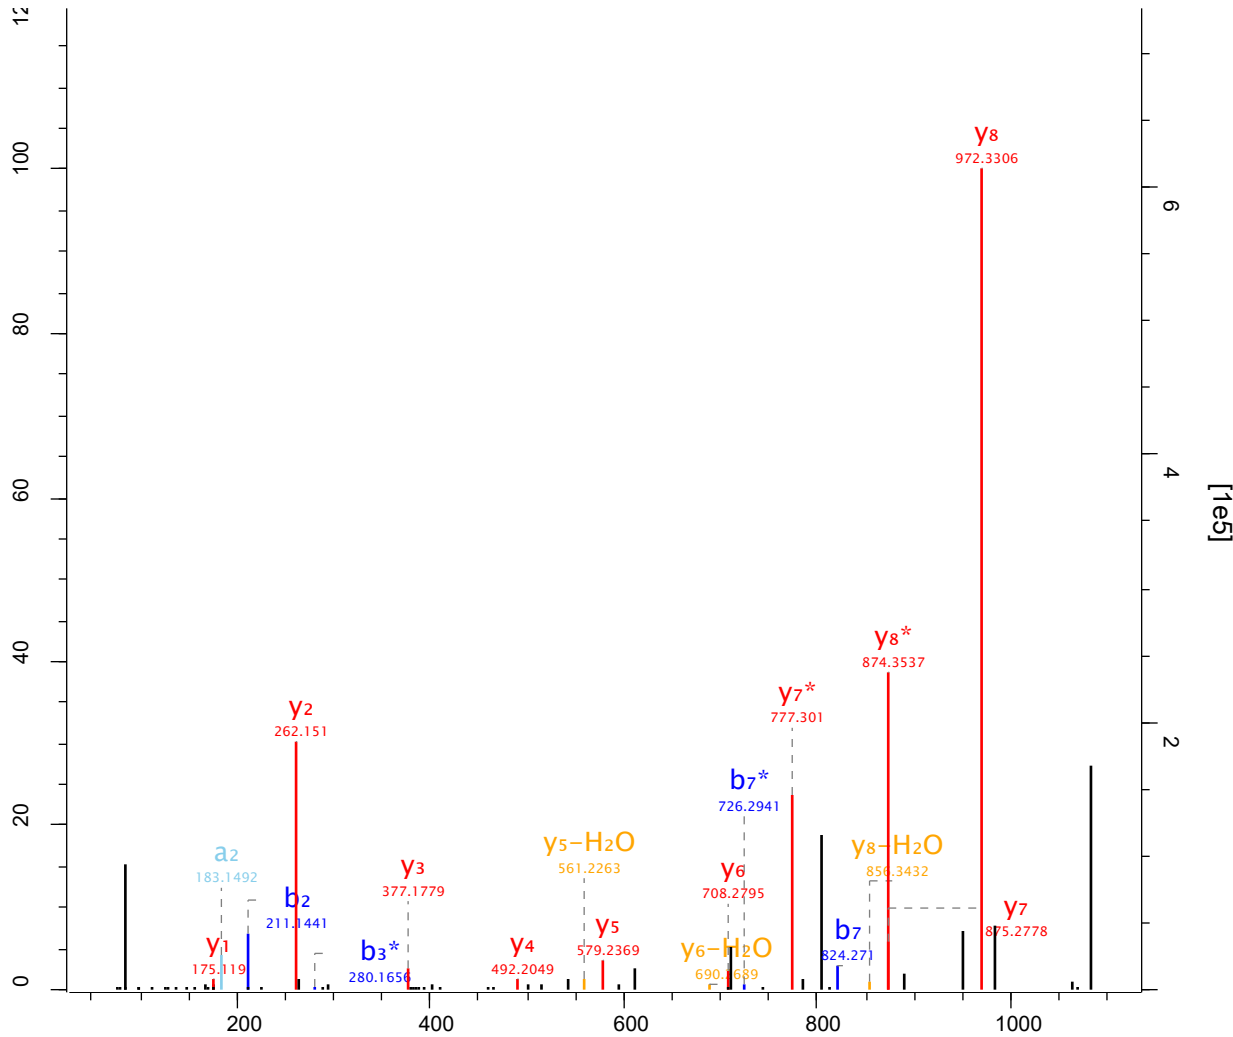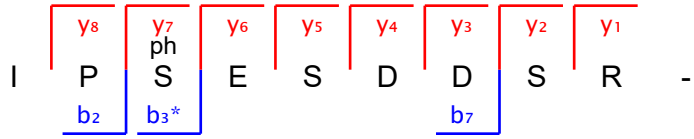

Raw file Scan Method Score m/z  
 sys\_15\_1 4553 FTMS; HCD 77.18 414.84

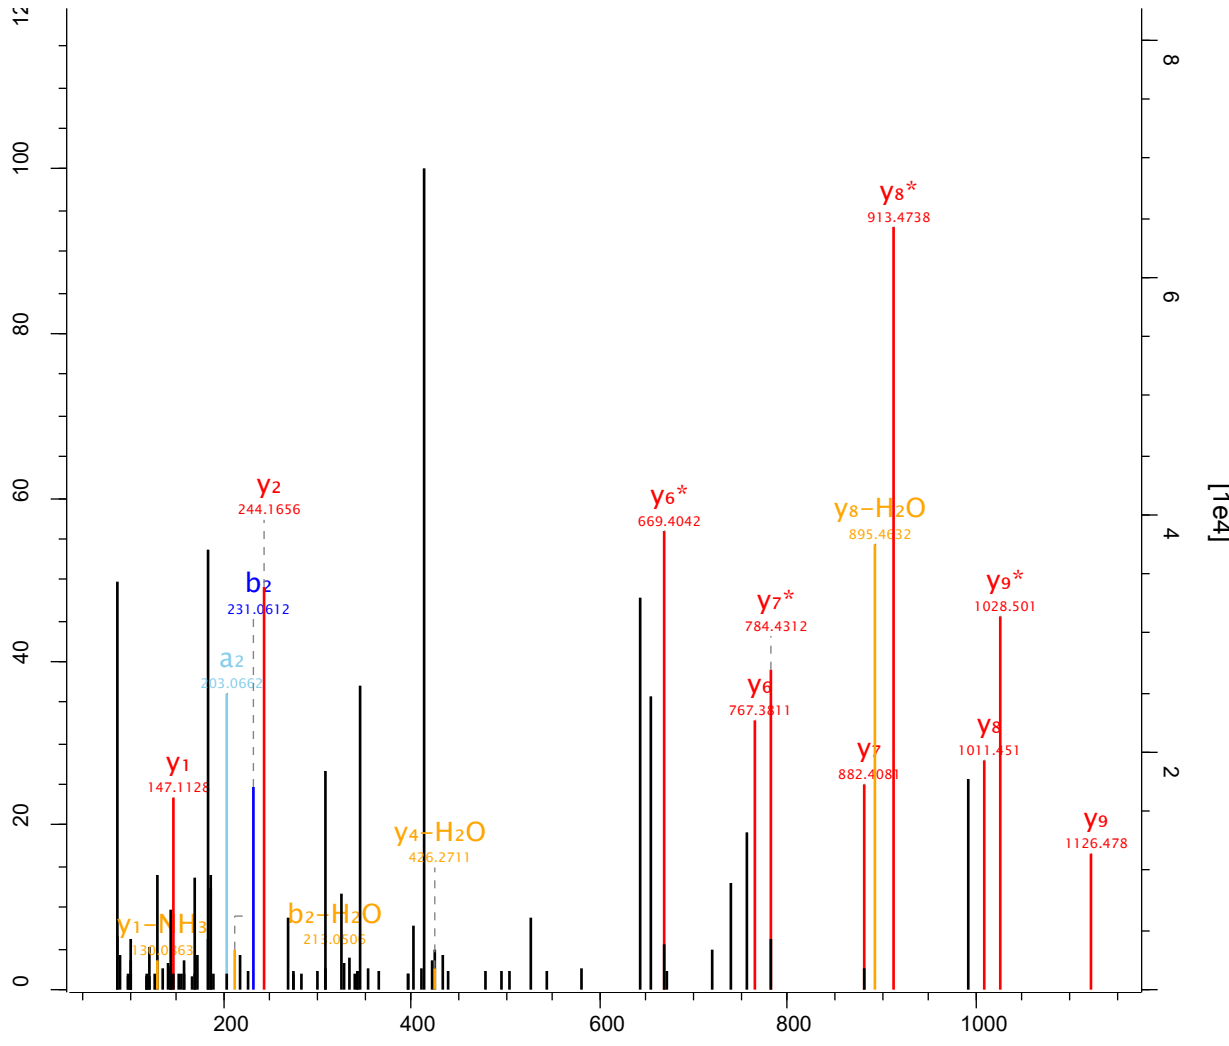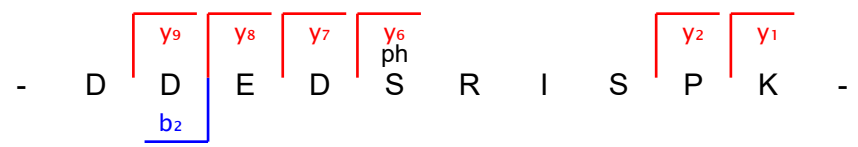

Raw file Scan Method Score m/z  
 sys\_15\_1 45702 FTMS; HCD 106.86 1044.39

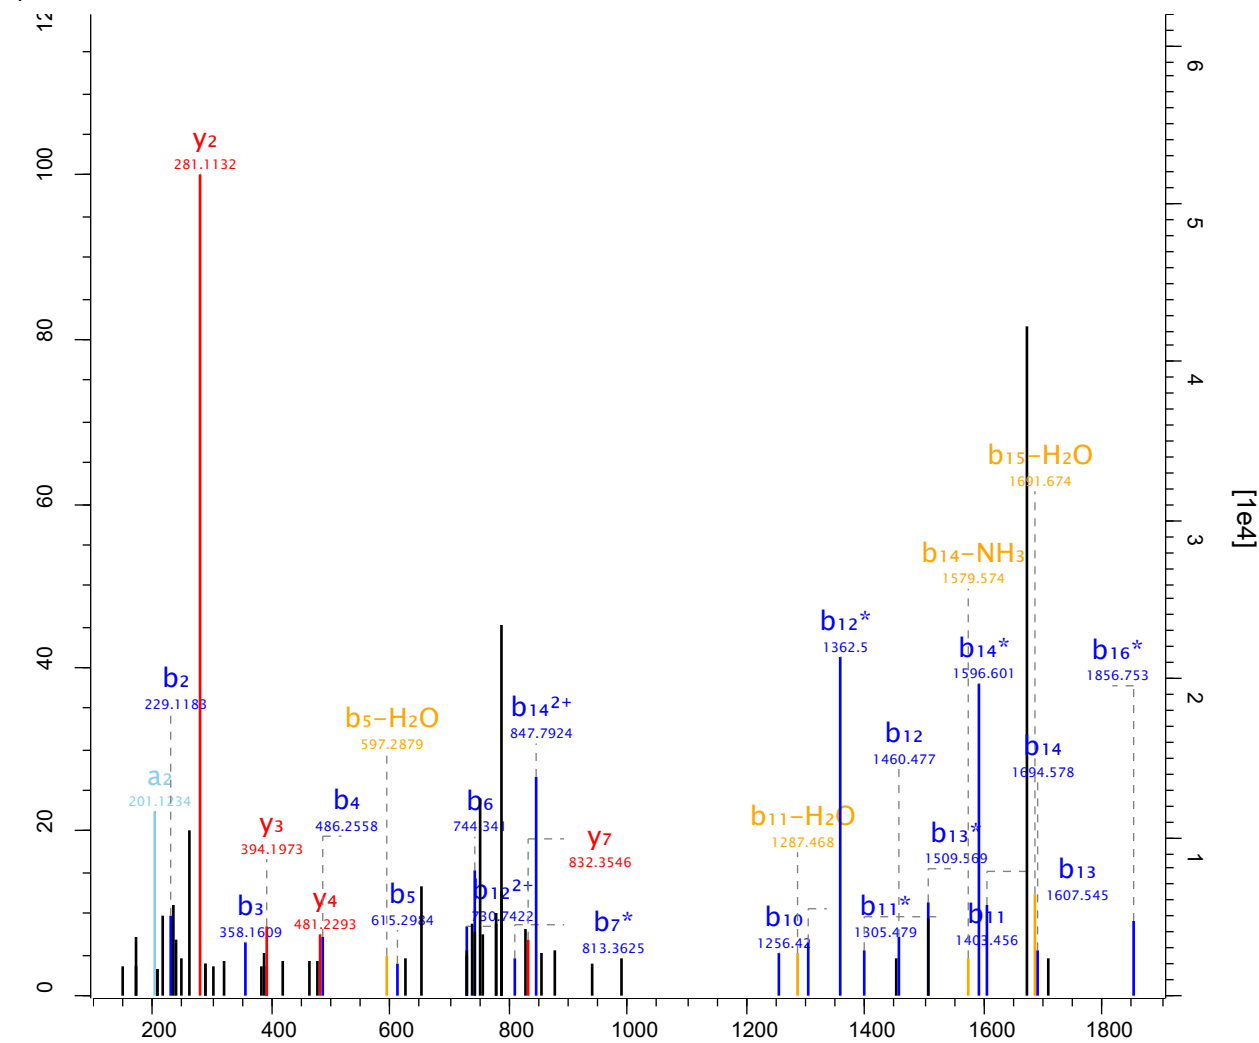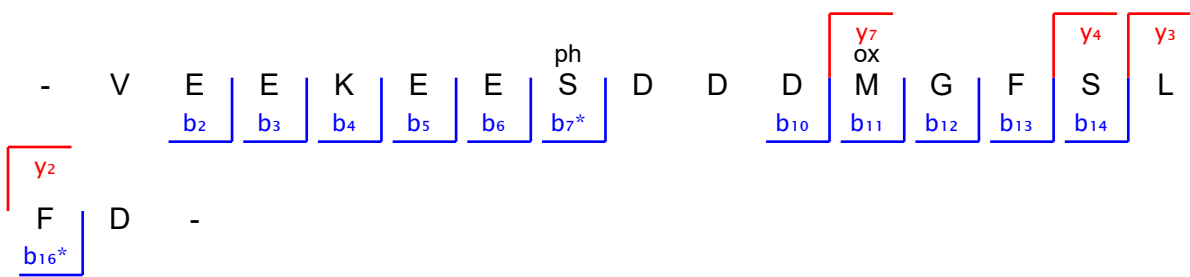

Raw file Scan Method Score m/z  
 sys\_15\_1 46699 FTMS; HCD 56.72 903.89

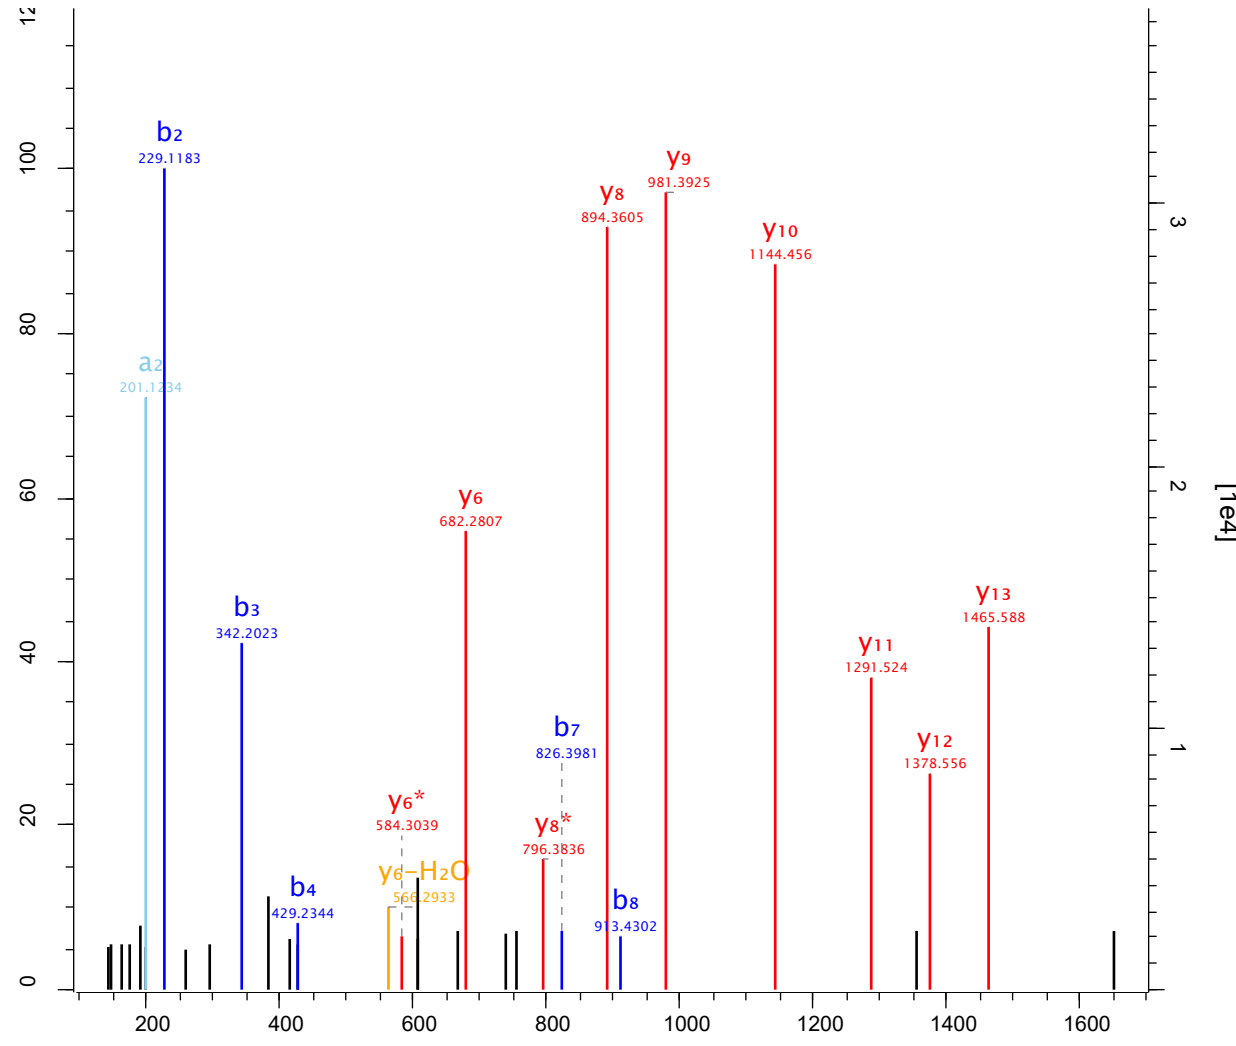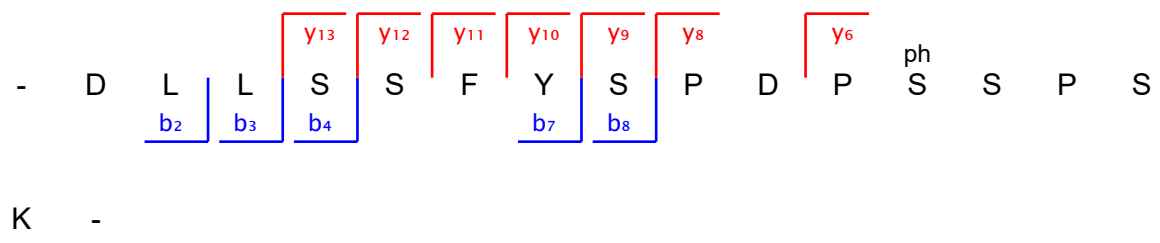



Raw file Scan Method Score m/z  
 sys\_15\_1 46904 FTMS; HCD 52.17 824.9

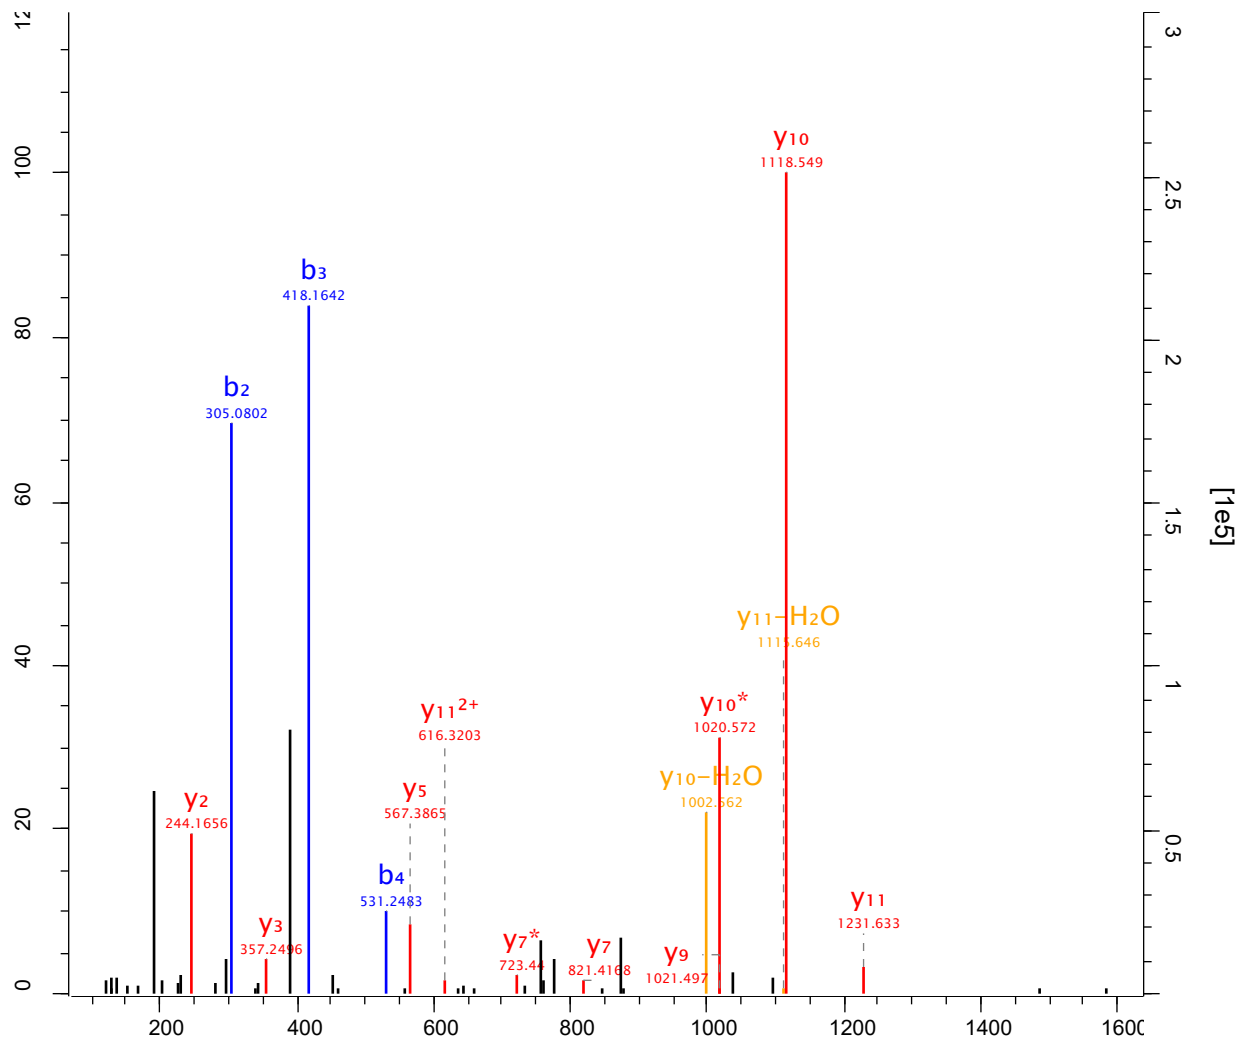

ac ox  
 - M D L L P A E S S P I L P K -  
 b<sub>2</sub> b<sub>3</sub> b<sub>4</sub> y<sub>11</sub> y<sub>10</sub> y<sub>9</sub> y<sub>7</sub> ph y<sub>5</sub> y<sub>3</sub> y<sub>2</sub>

Raw file Scan Method Score m/z  
 sys\_15\_1 46923 FTMS; HCD 190.55 885.89

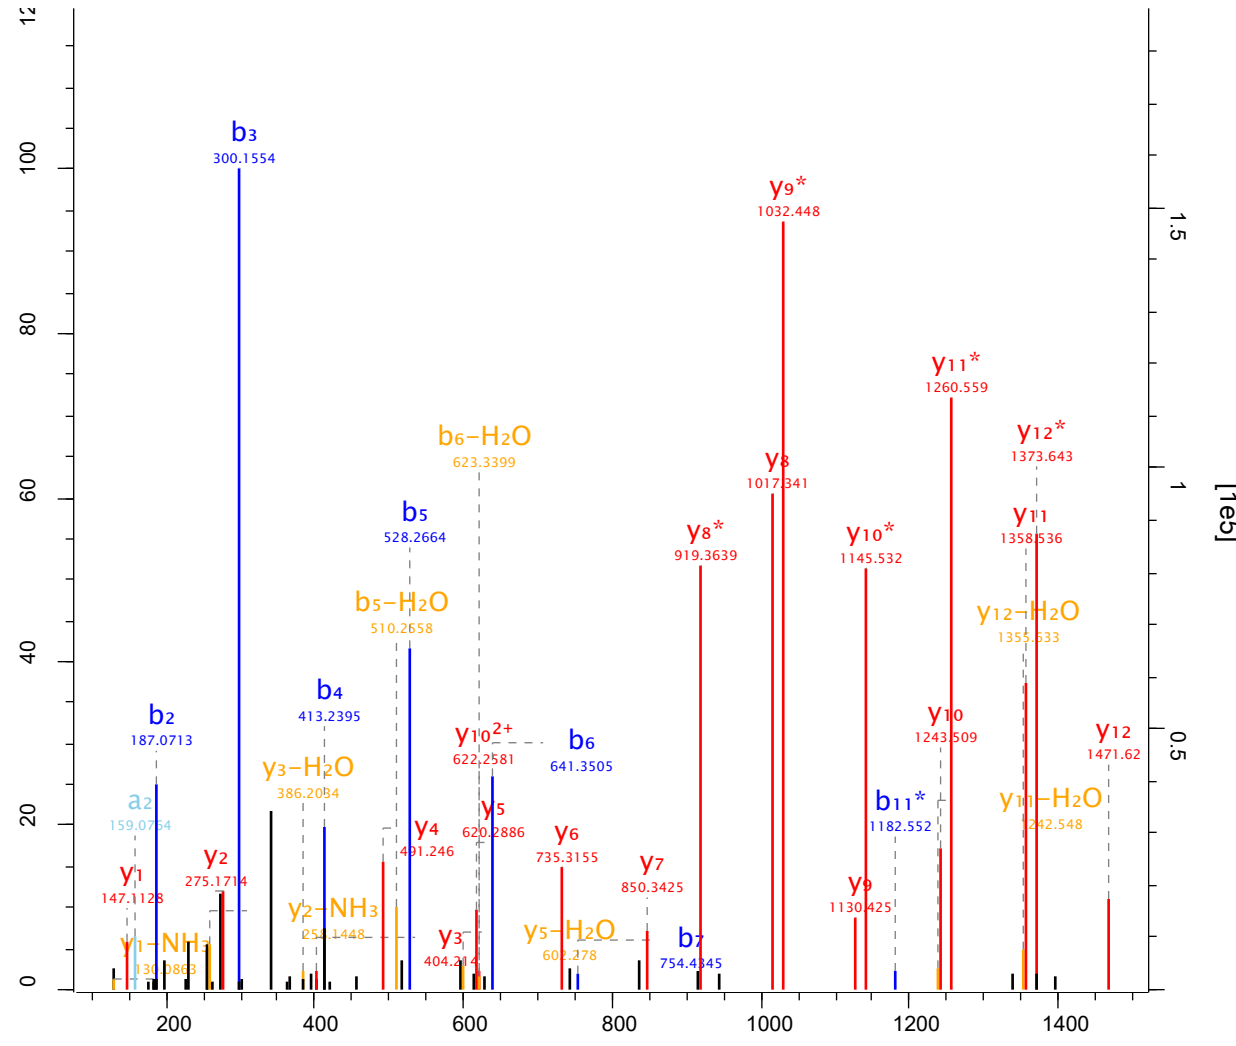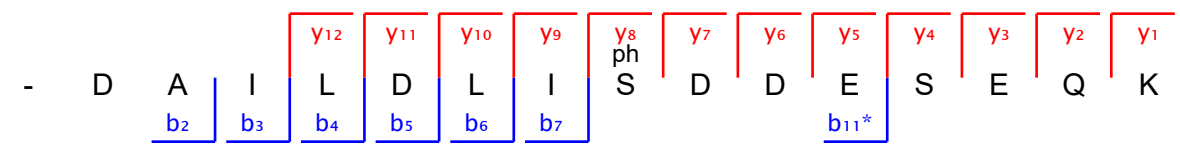

Raw file Scan Method Score m/z  
 sys\_15\_1 4711 FTMS; HCD 188.48 886.85

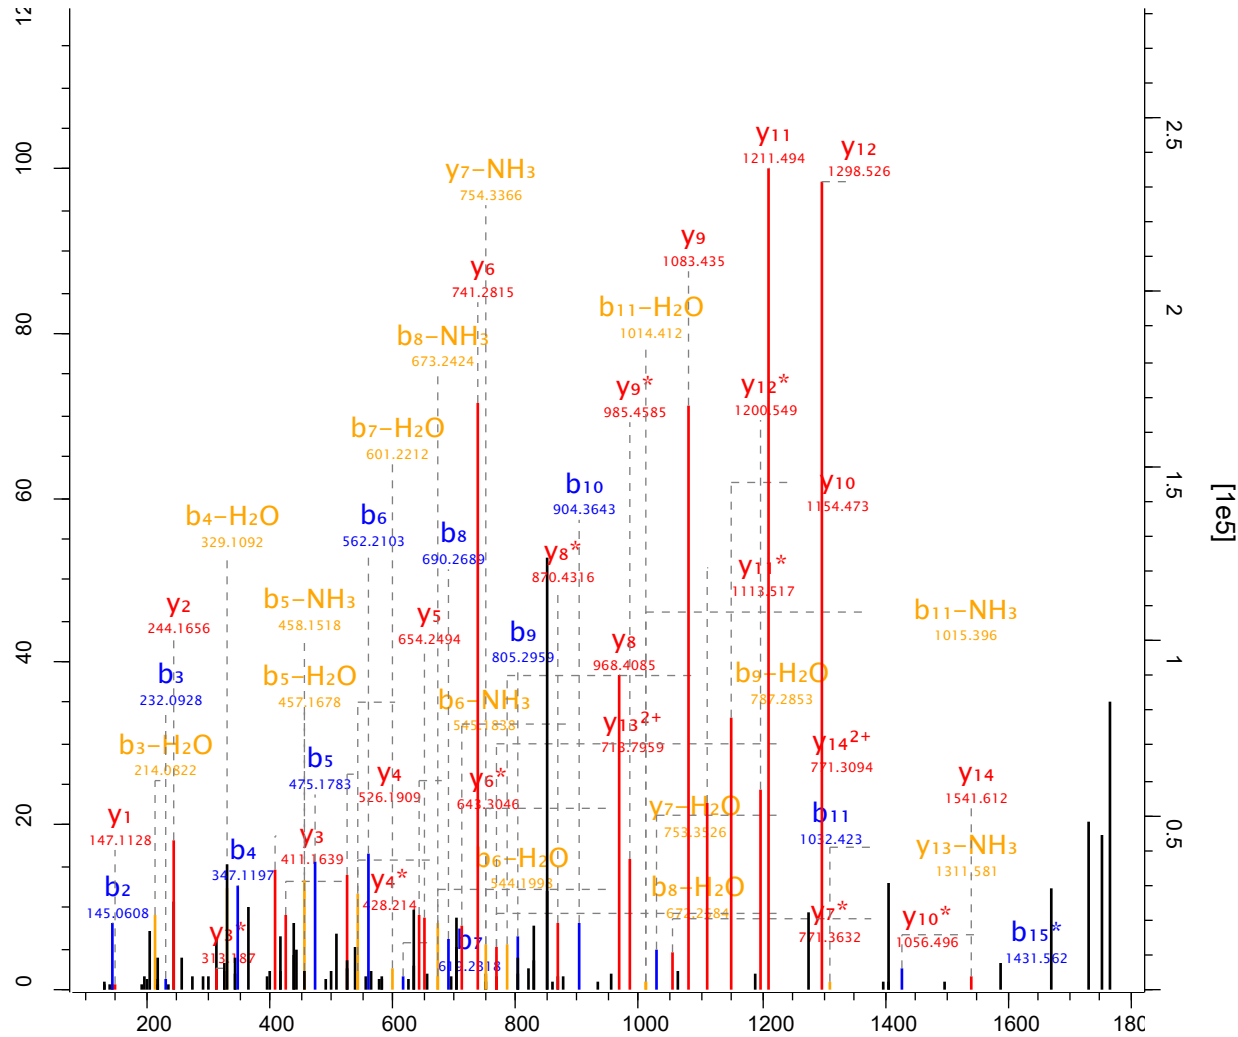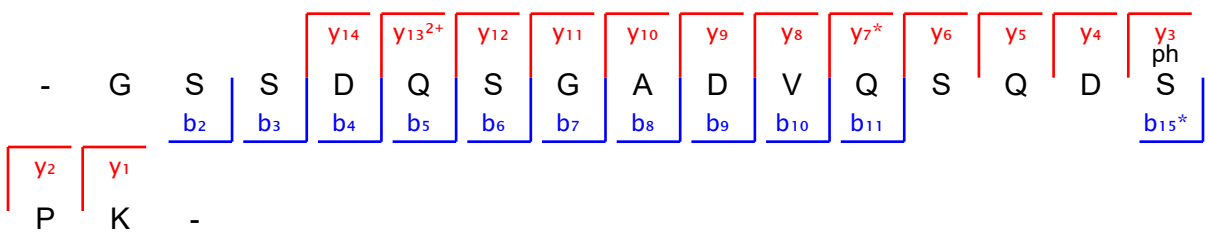

| Raw file | Scan | Method    | Score | m/z    |
|----------|------|-----------|-------|--------|
| sys_15_1 | 4723 | FTMS; HCD | 63.3  | 620.26 |

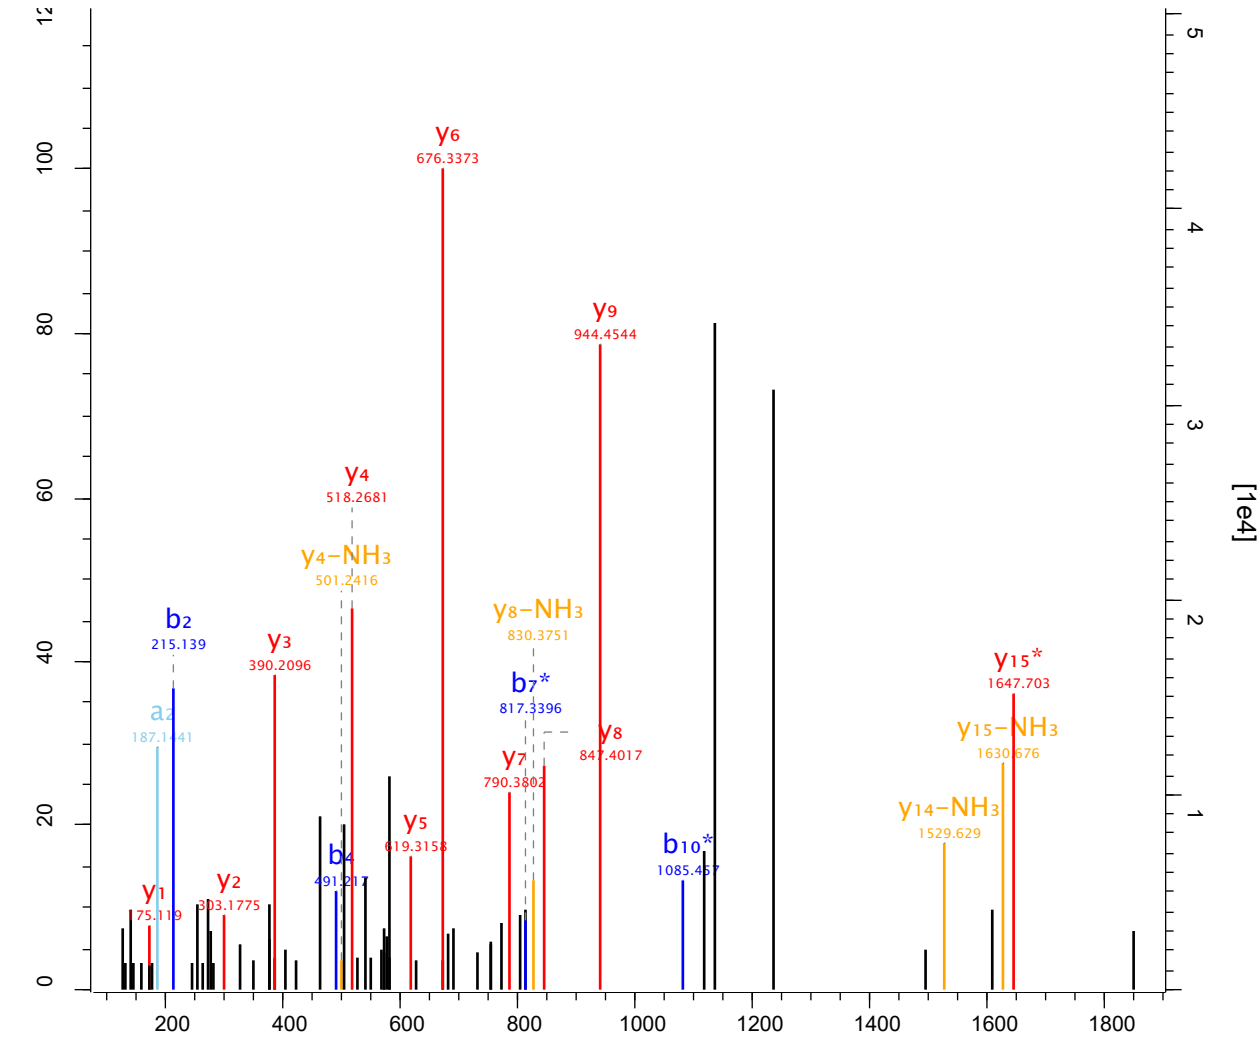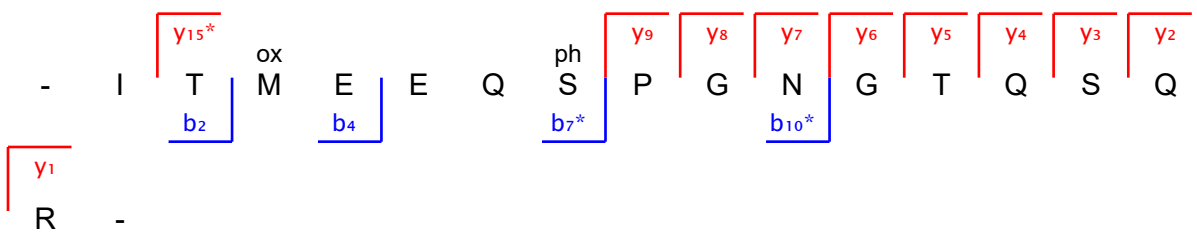

Raw file Scan Method Score m/z  
 sys\_15\_1 47430 FTMS; HCD 67.11 701.68

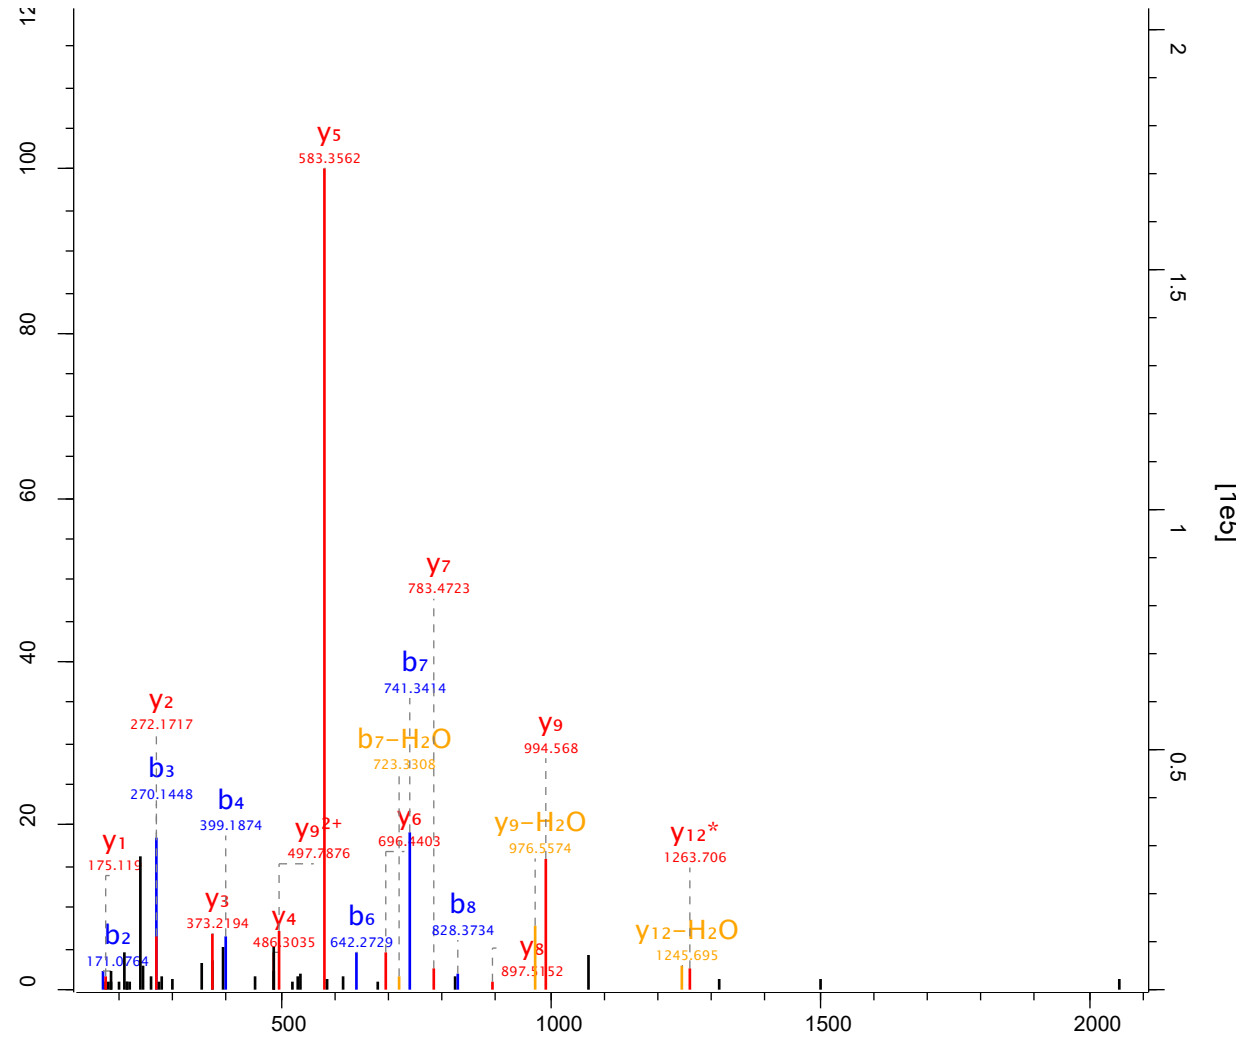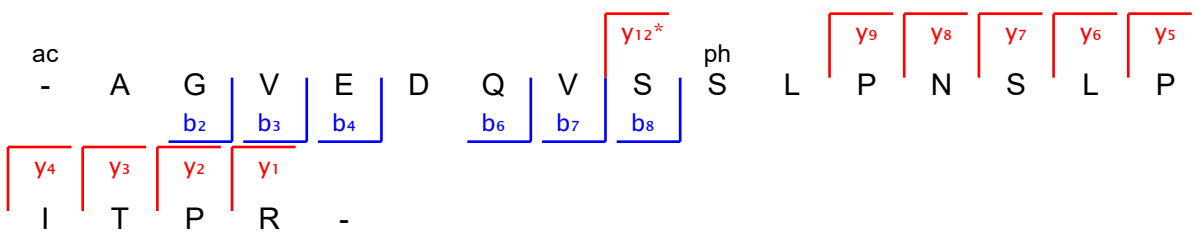

Raw file Scan Method Score m/z  
 sys\_15\_1 47474 FTMS; HCD 134.04 1043.38

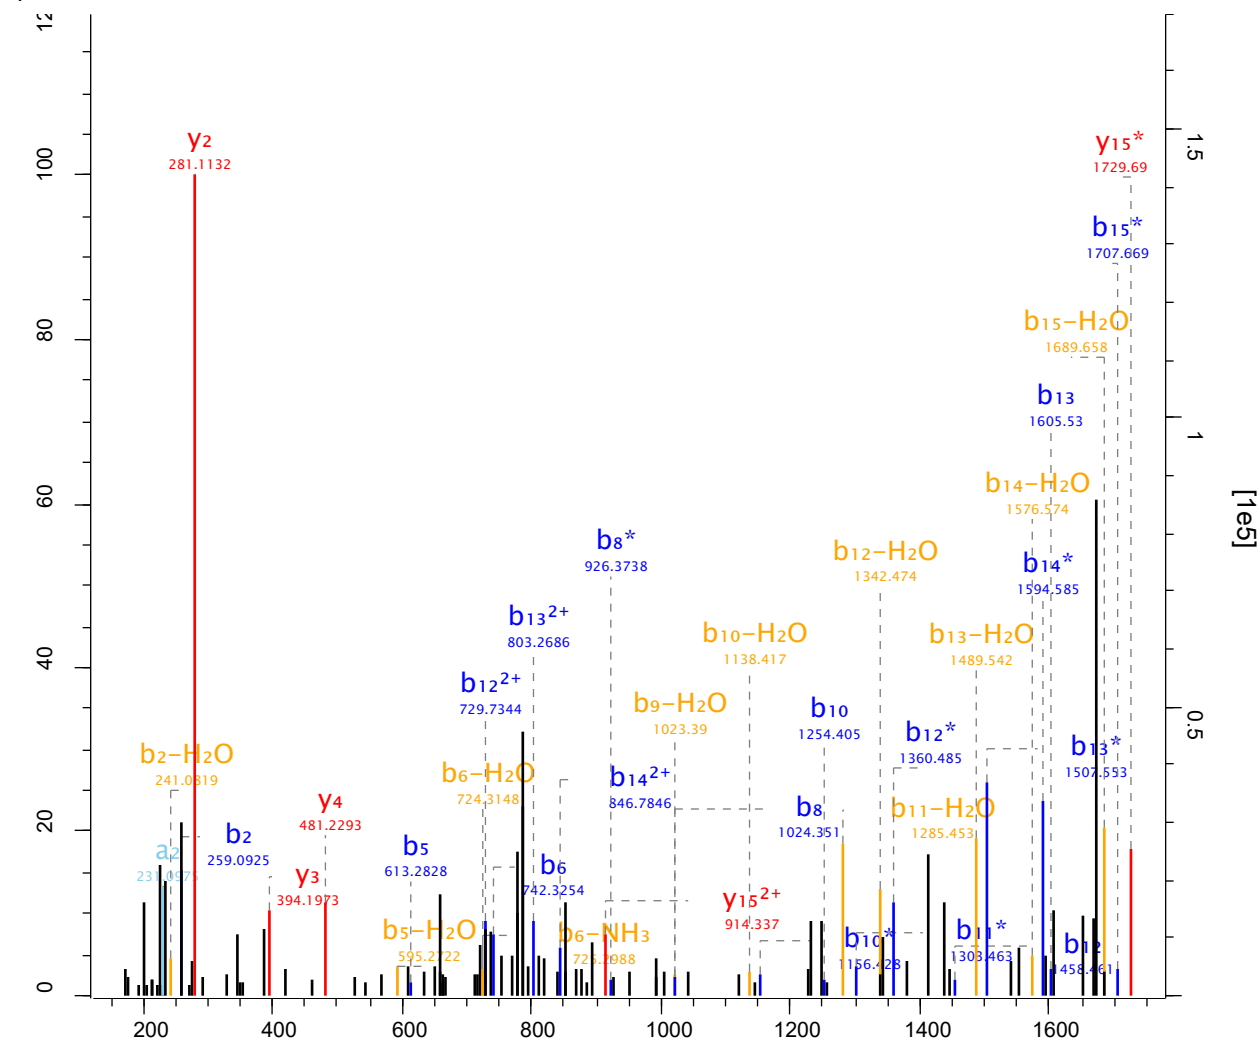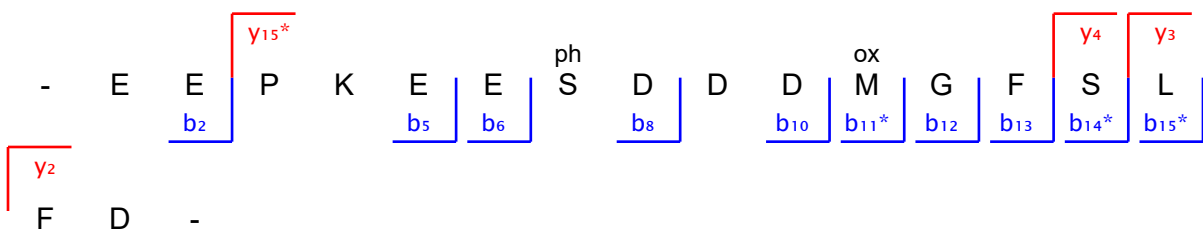

Raw file Scan Method Score m/z  
 sys\_15\_1 4748 FTMS; HCD 78.33 668.78

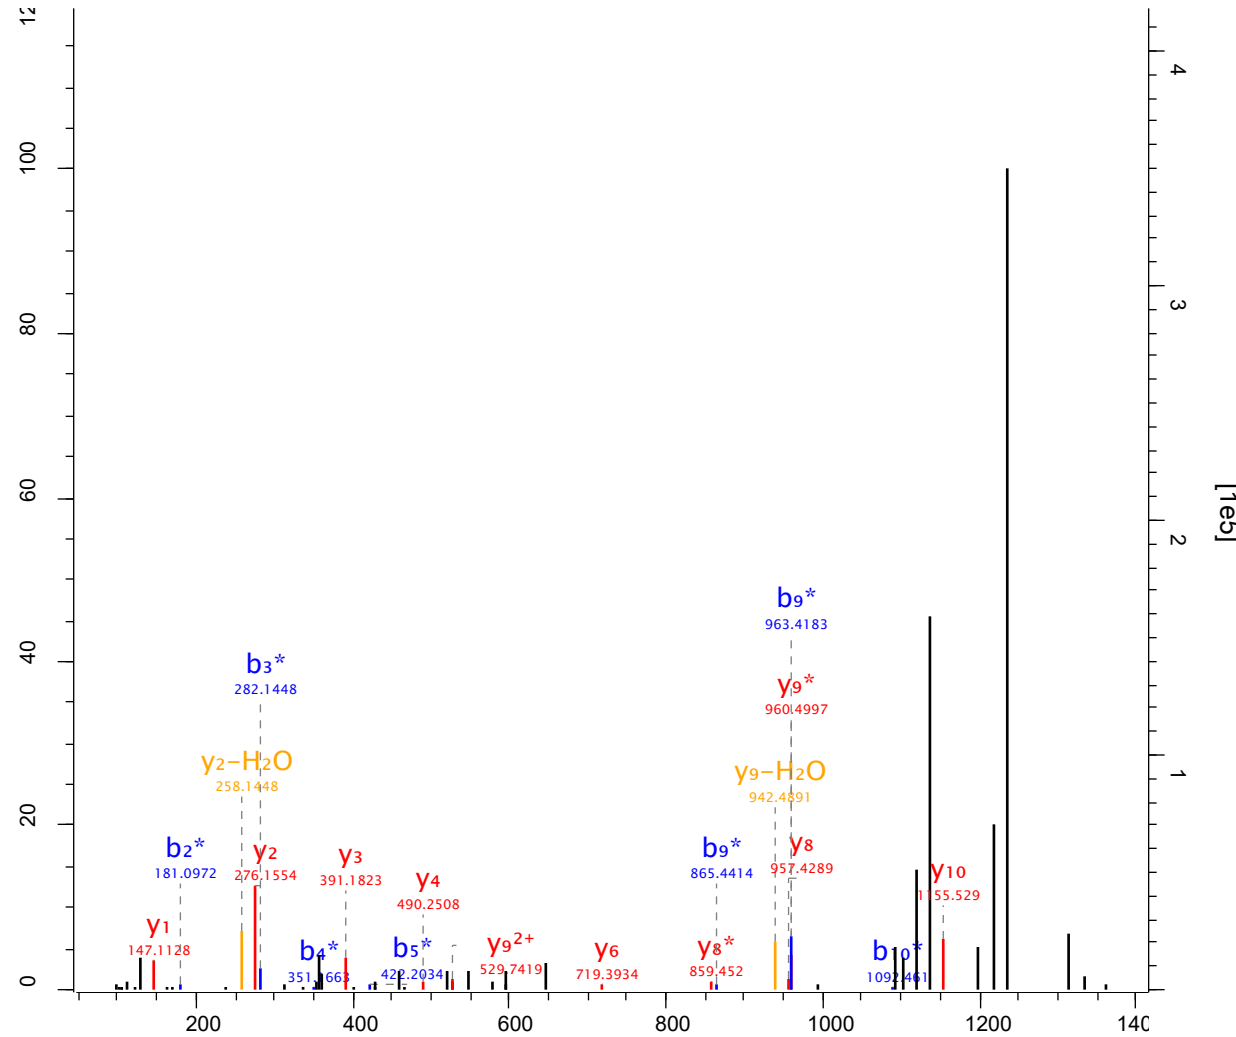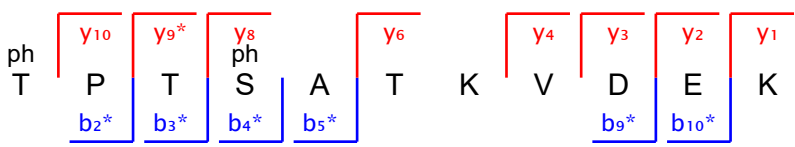

Raw file Scan Method Score m/z  
 sys\_15\_1 48276 FTMS; HCD 149.44 944.42

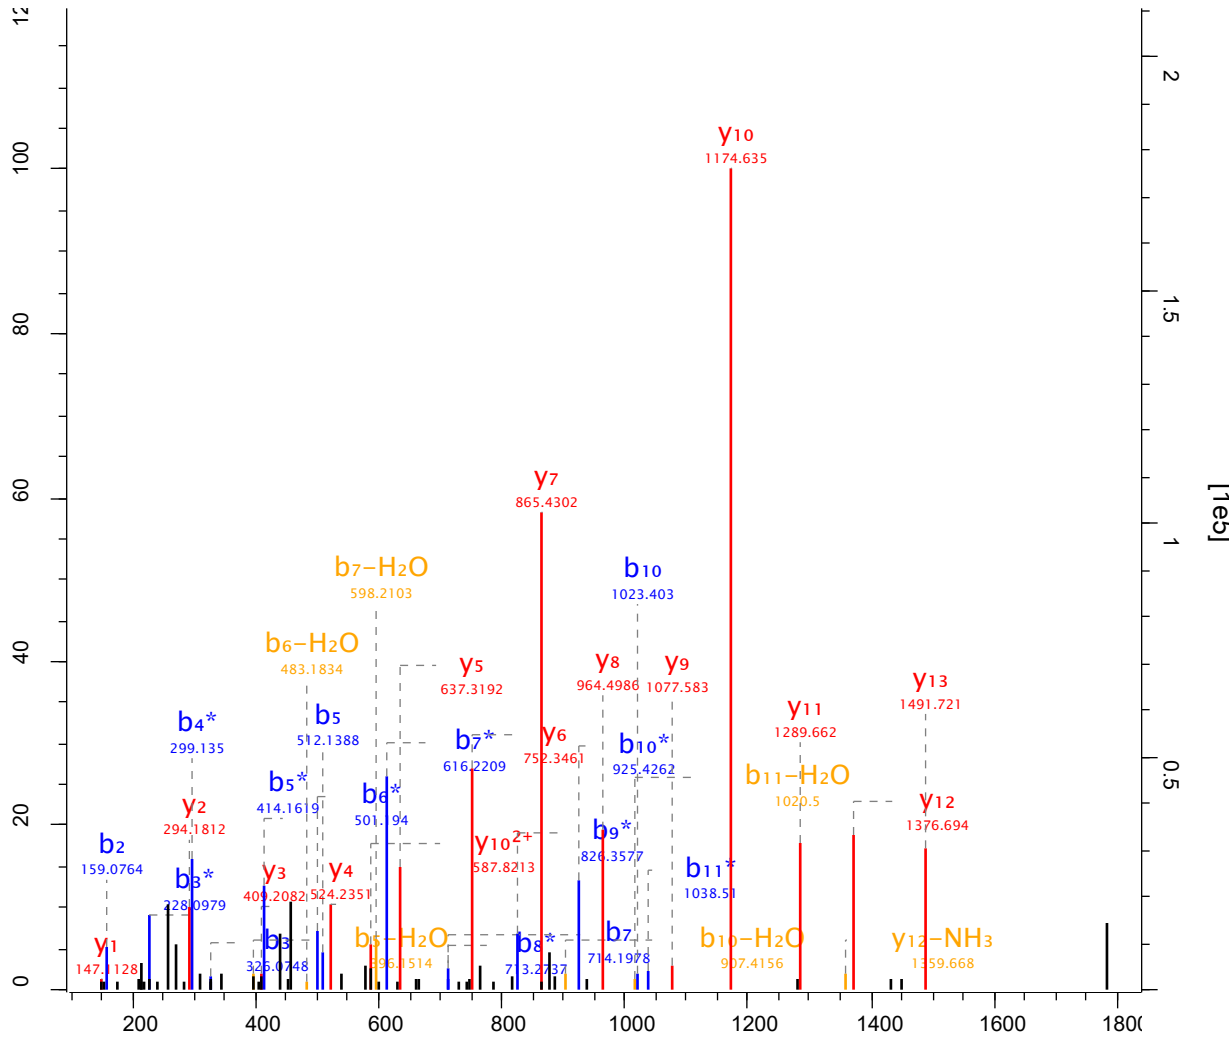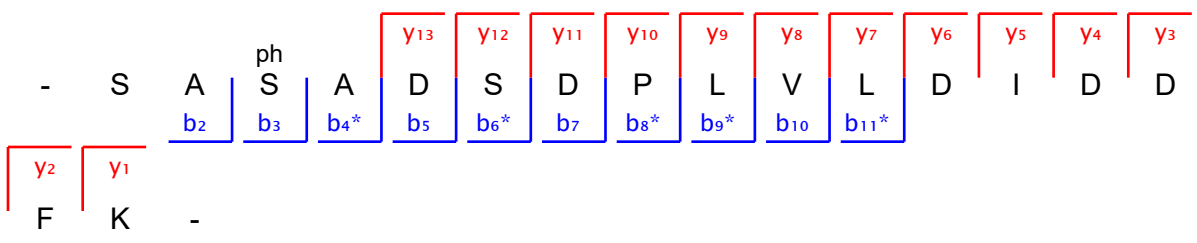



| Raw file | Scan | Method    | Score | m/z    |
|----------|------|-----------|-------|--------|
| sys_15_1 | 4858 | FTMS; HCD | 66.27 | 604.77 |

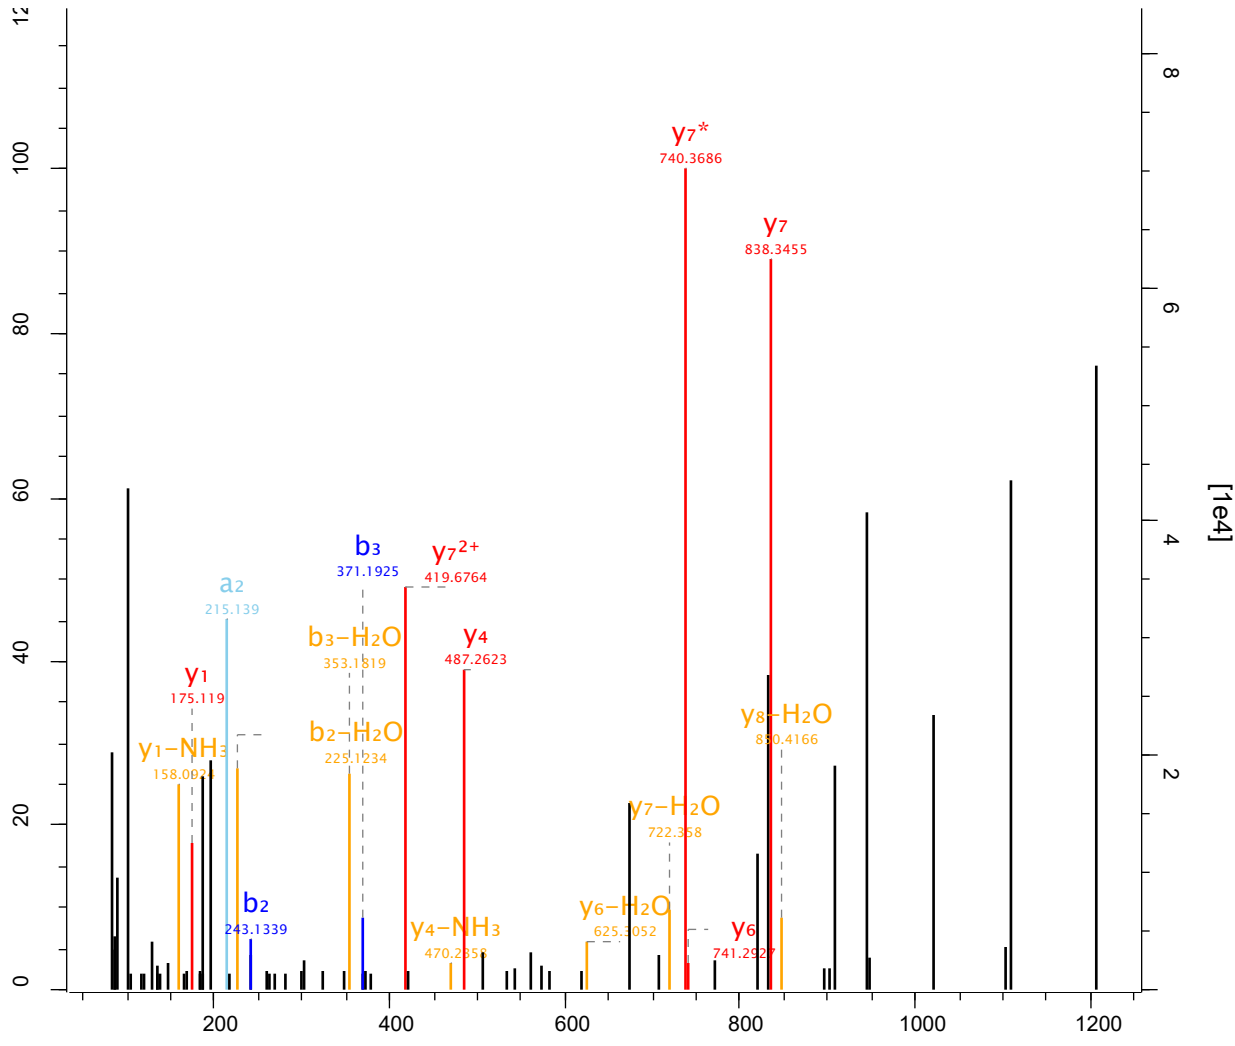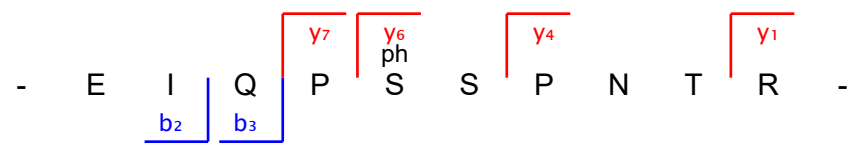

Raw file Scan Method Score m/z  
 sys\_15\_1 48906 FTMS; HCD 112.26 776.38

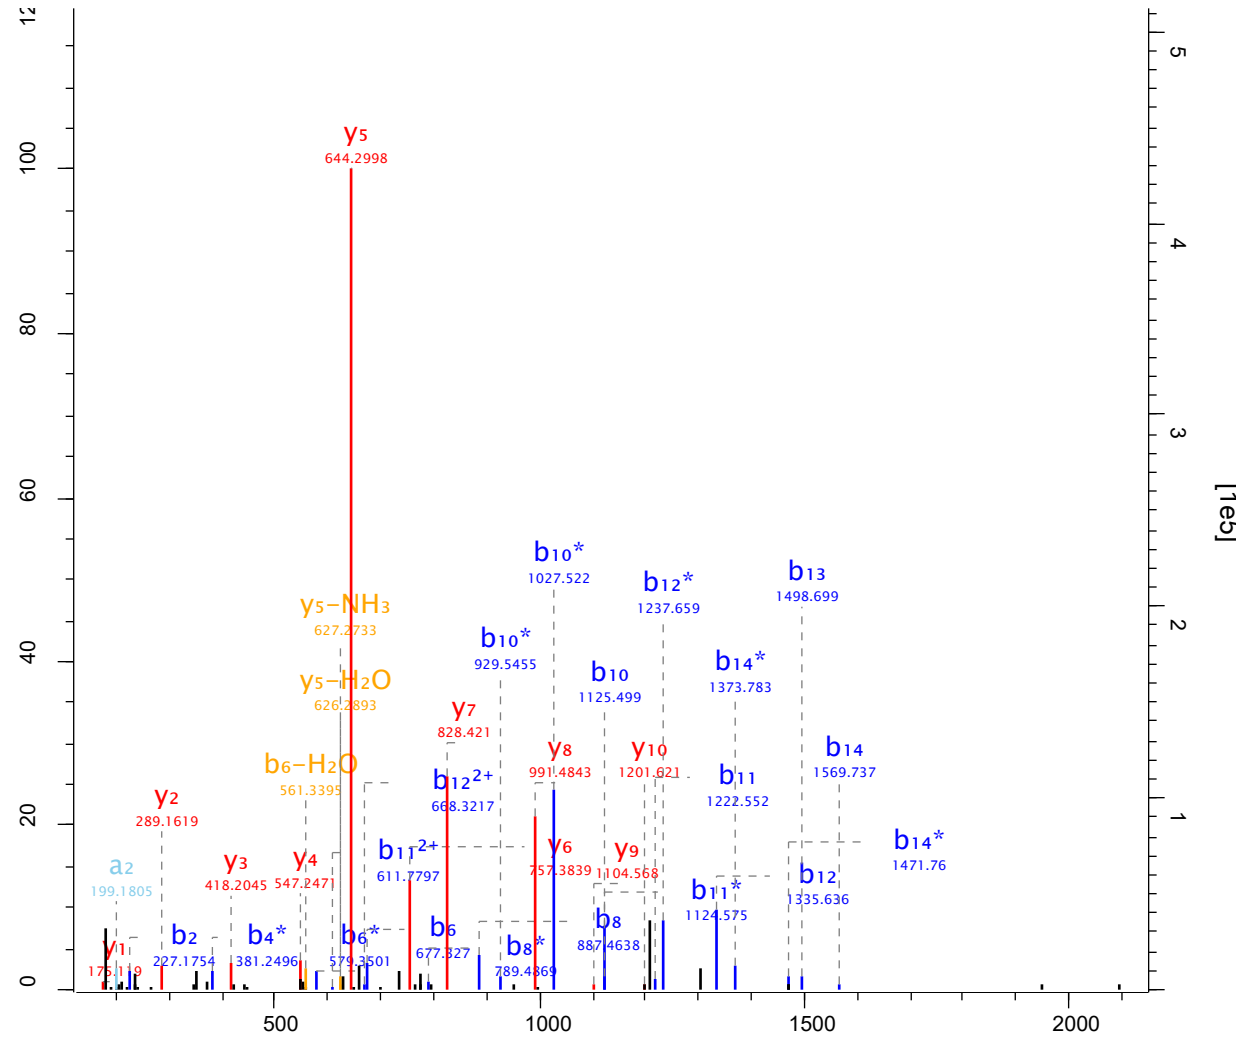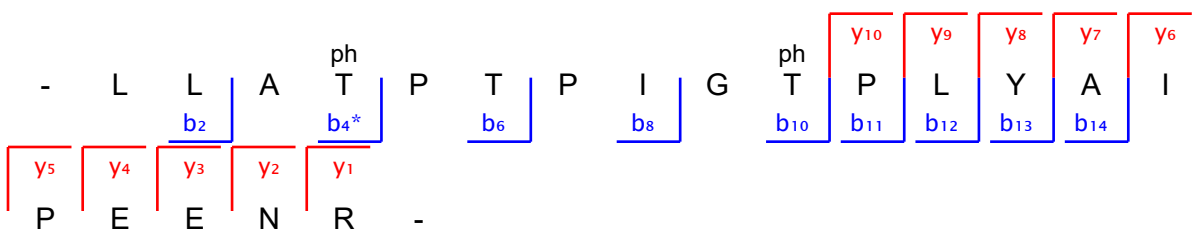

Raw file Scan Method Score m/z  
 sys\_15\_1 48919 FTMS; HCD 77.08 889.44

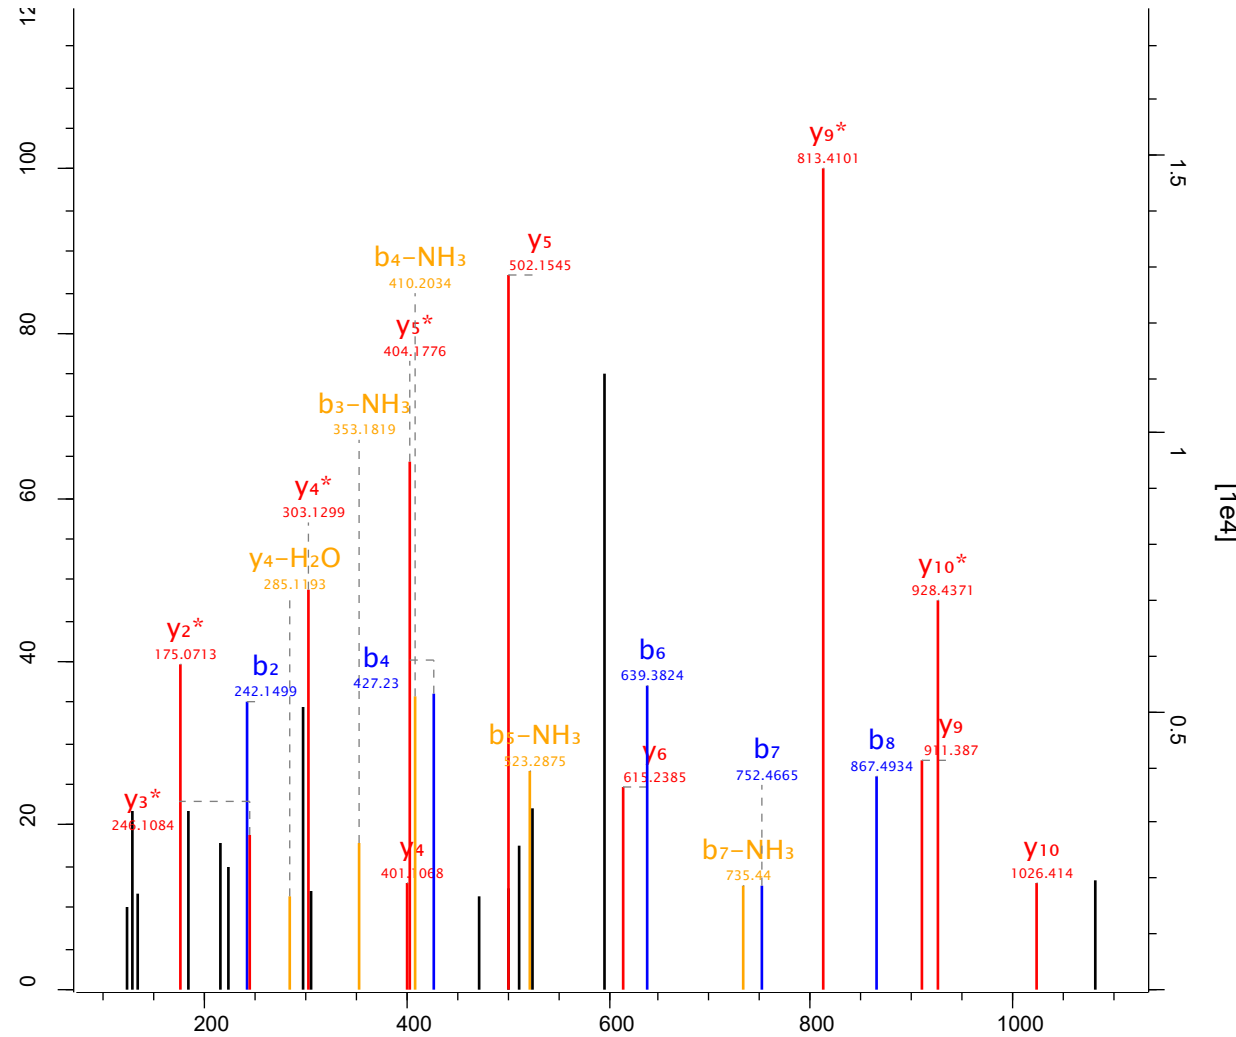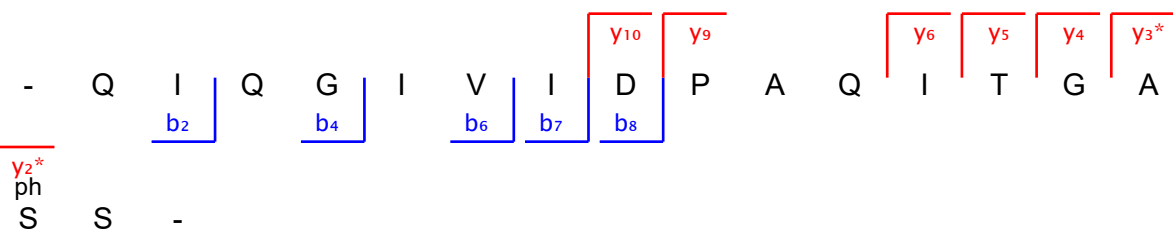

Raw file Scan Method Score m/z  
 sys\_15\_1 49508 FTMS; HCD 46.89 853.39

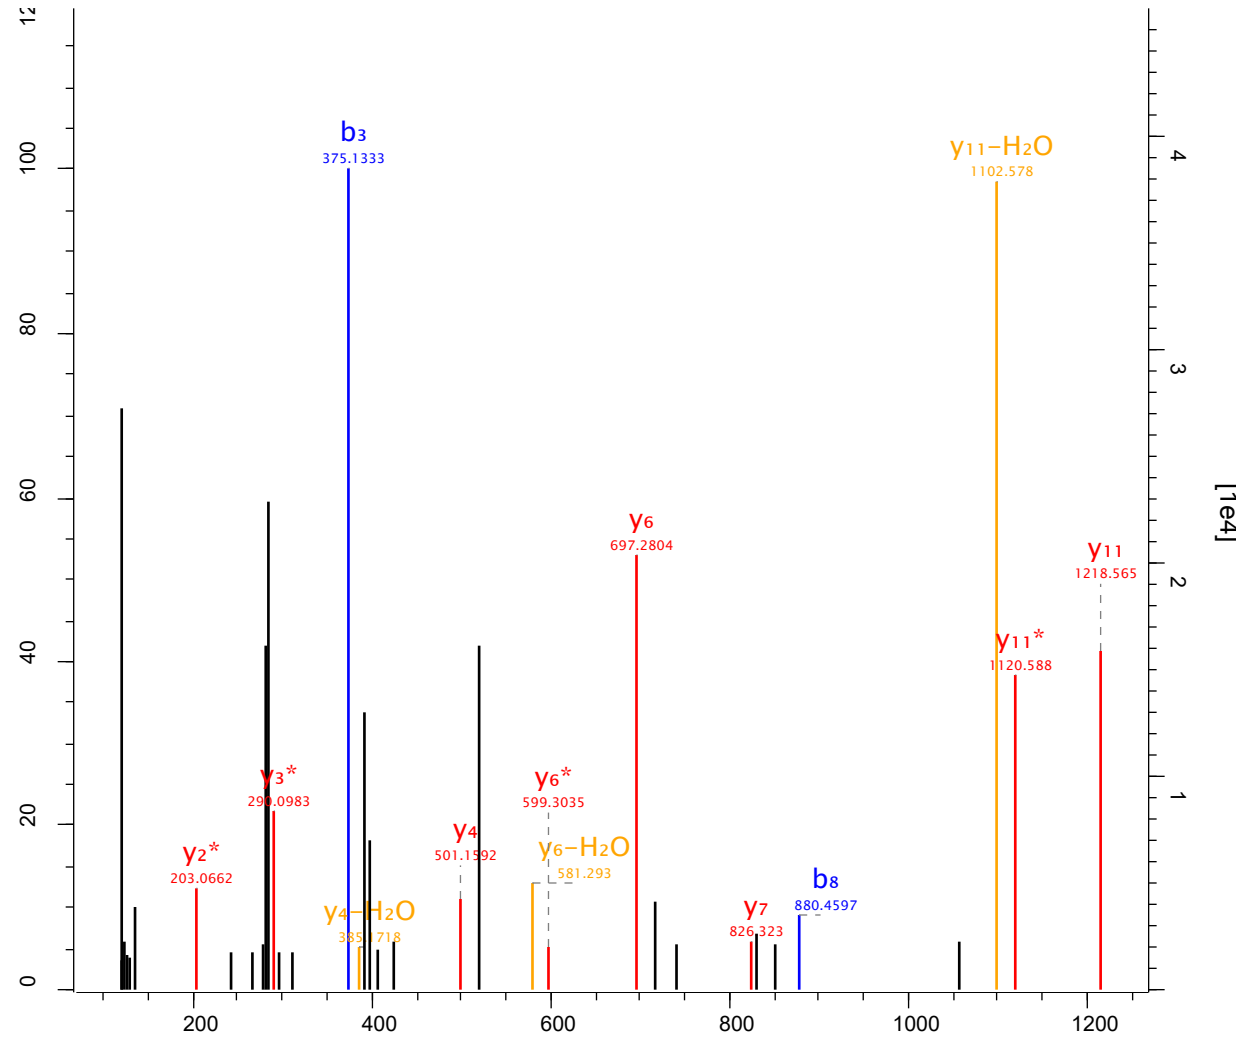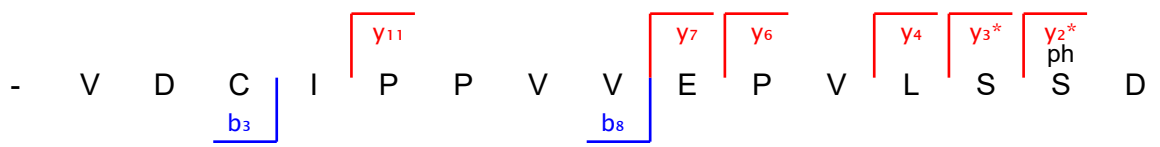

Raw file Scan Method Score m/z  
 sys\_15\_1 4959 FTMS; HCD 166.65 629.28

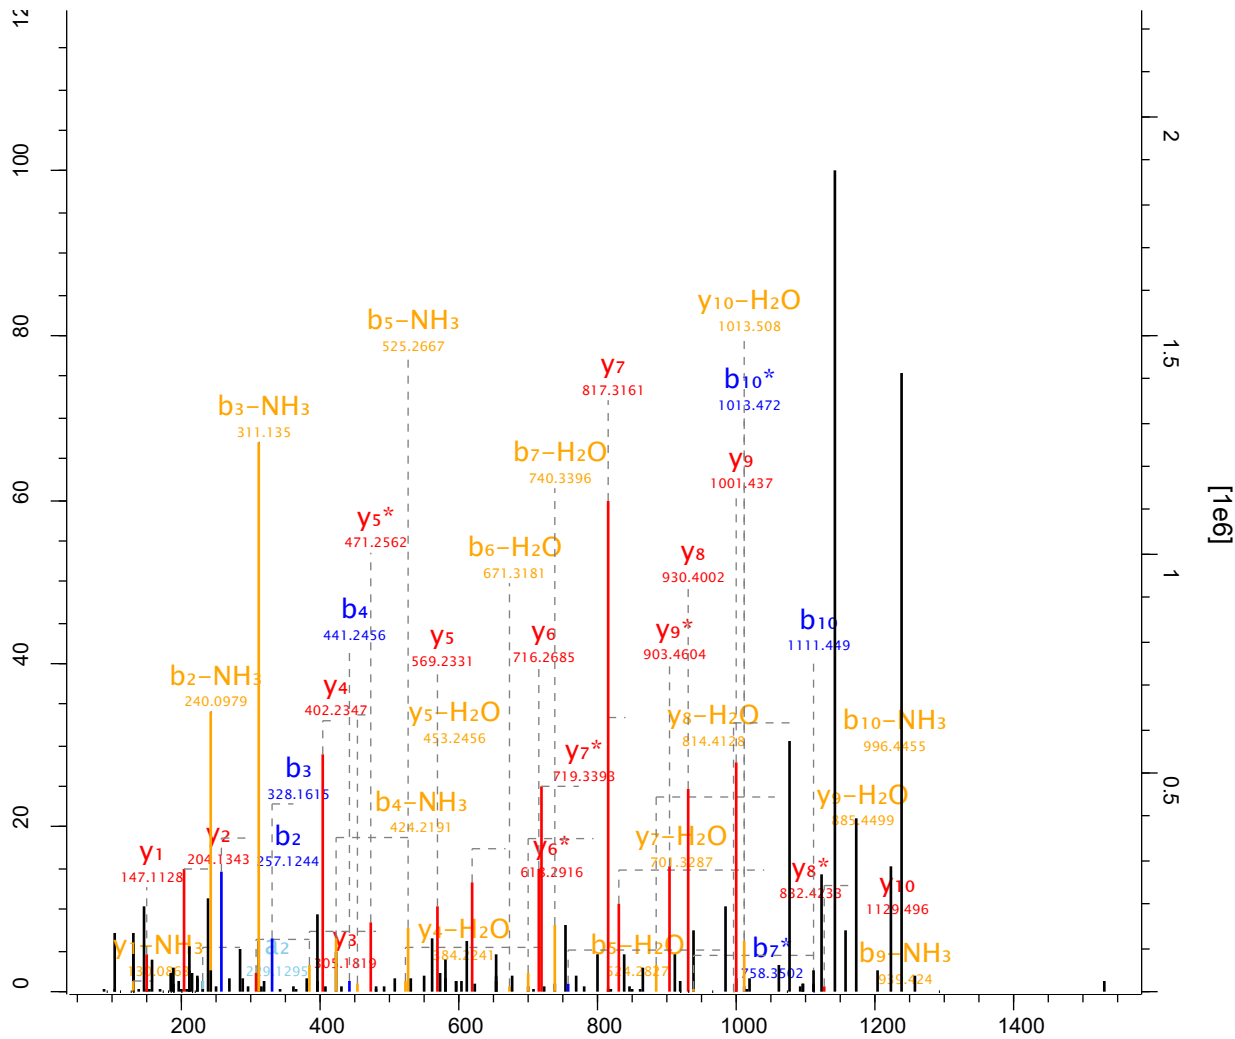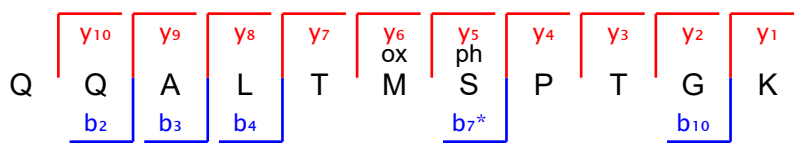

Raw file Scan Method Score m/z  
 sys\_15\_1 50021 FTMS; HCD 44.79 969.41

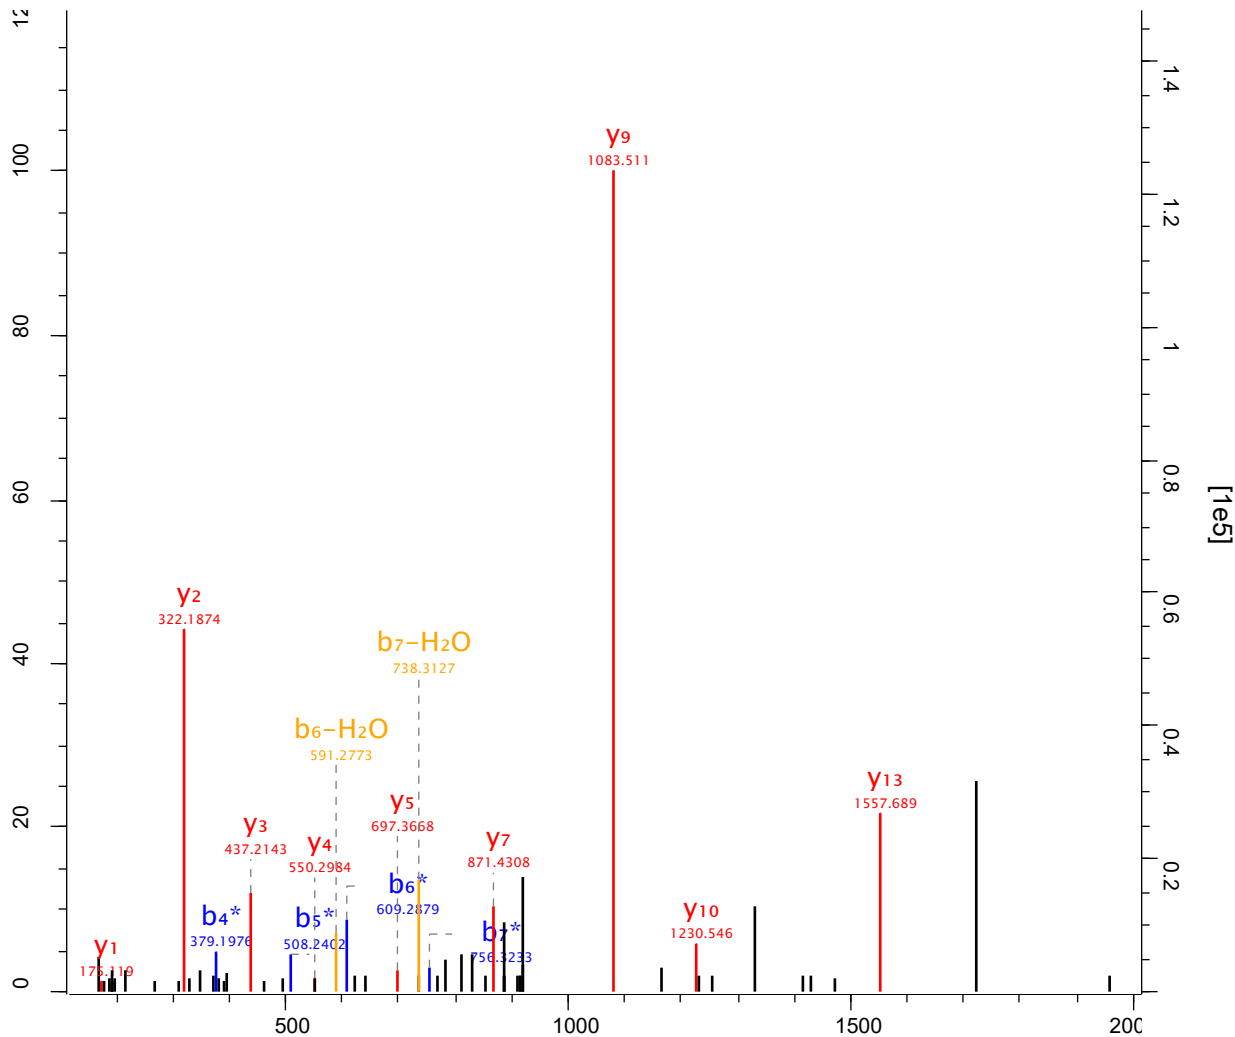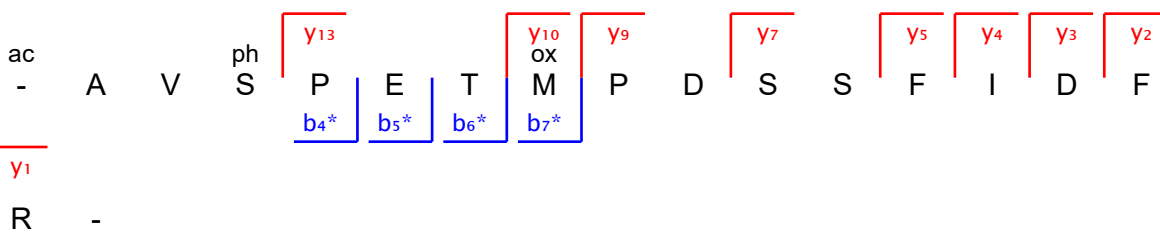

Raw file Scan Method Score m/z  
 sys\_15\_1 5021 FTMS; HCD 131.41 632.24

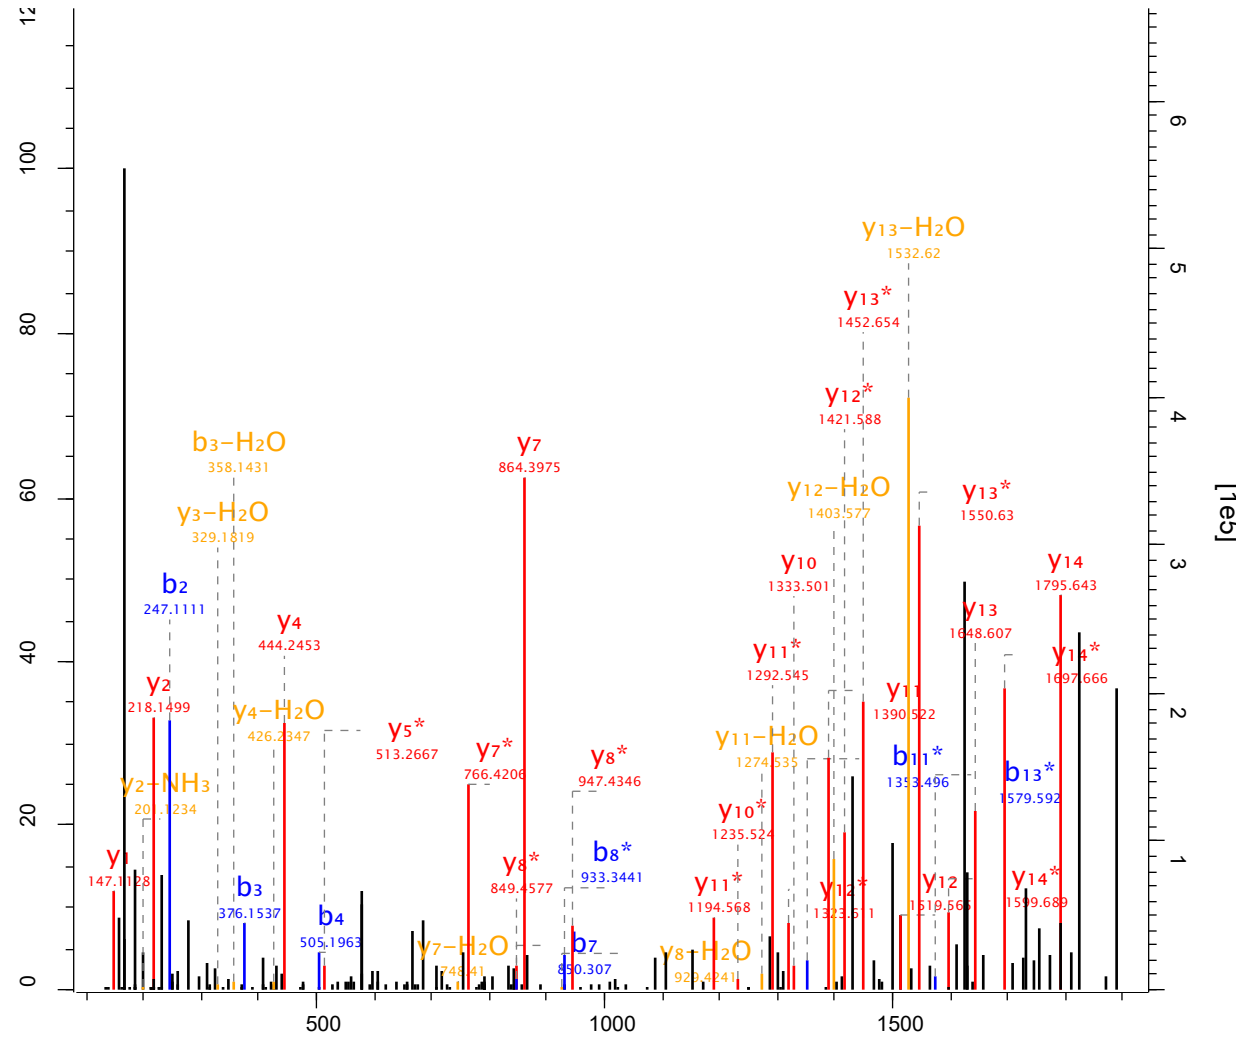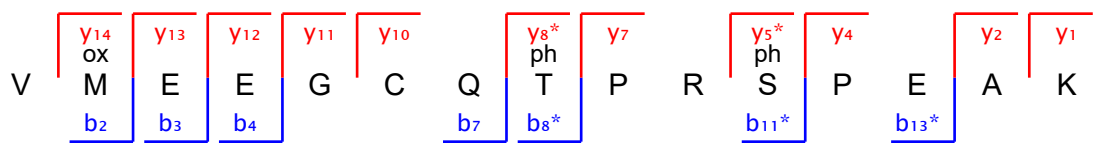

Raw file Scan Method Score m/z  
 sys\_15\_1 5055 FTMS; HCD 66.27 582.72

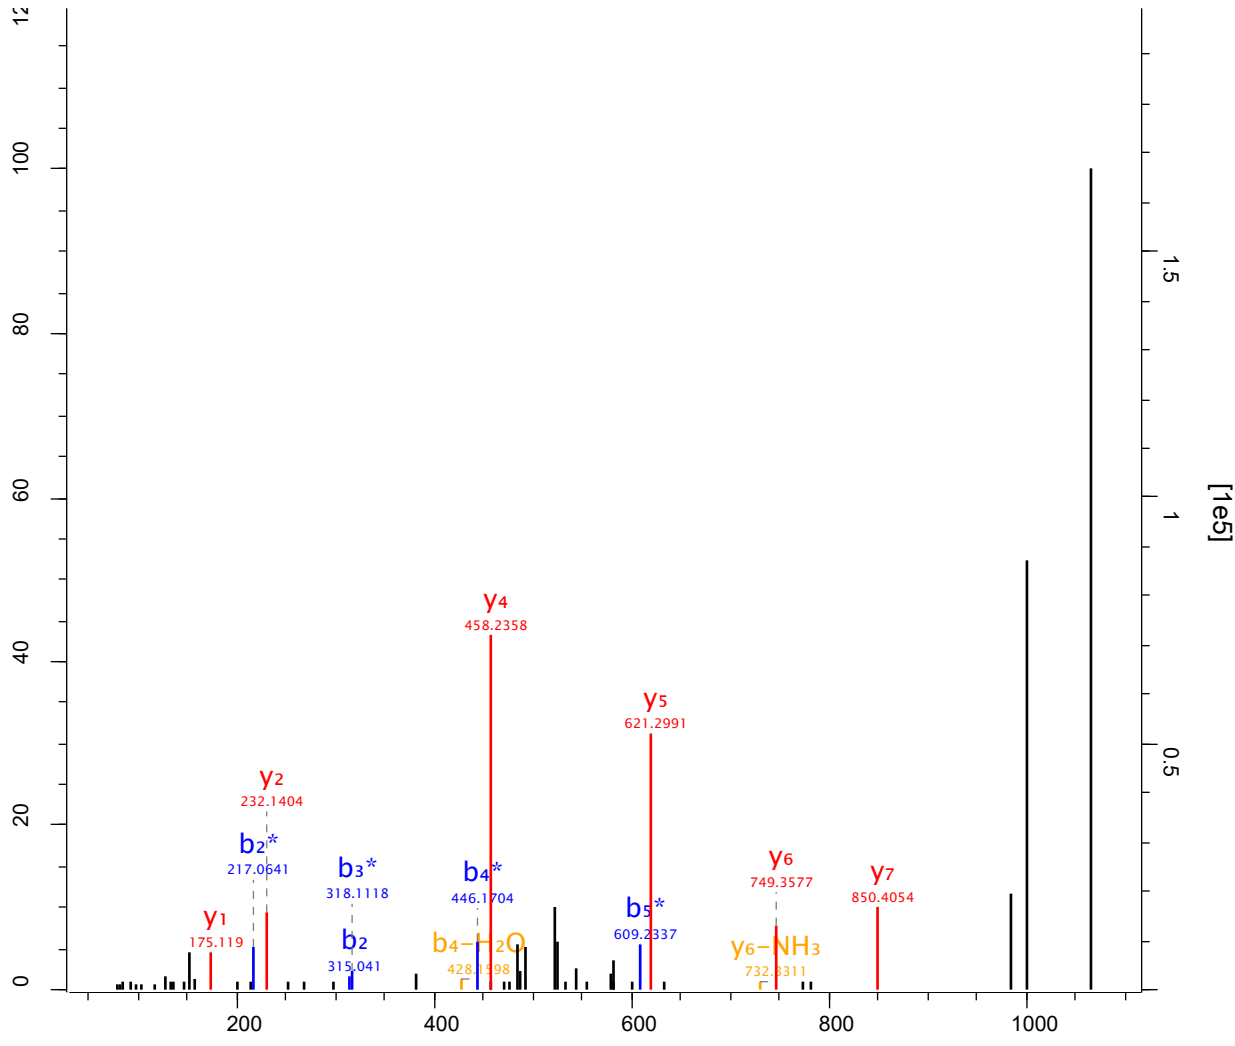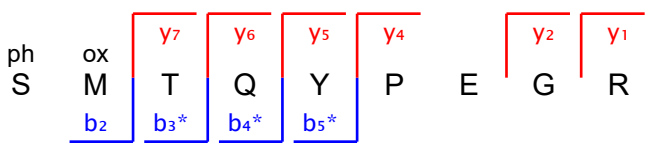



Raw file Scan Method Score m/z  
 sys\_15\_1 50600 FTMS; HCD 108.08 1018.01

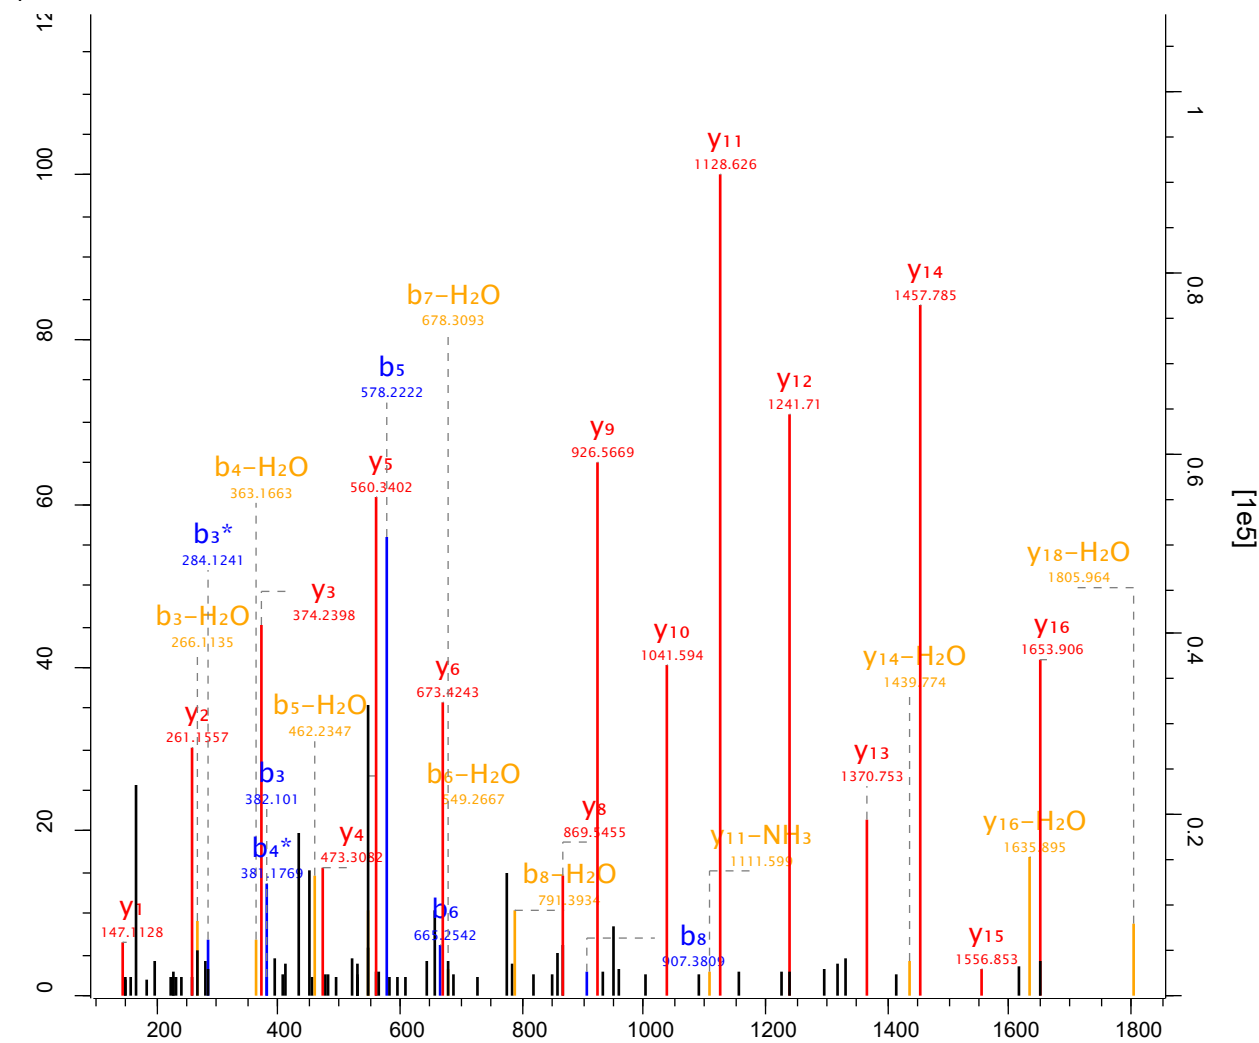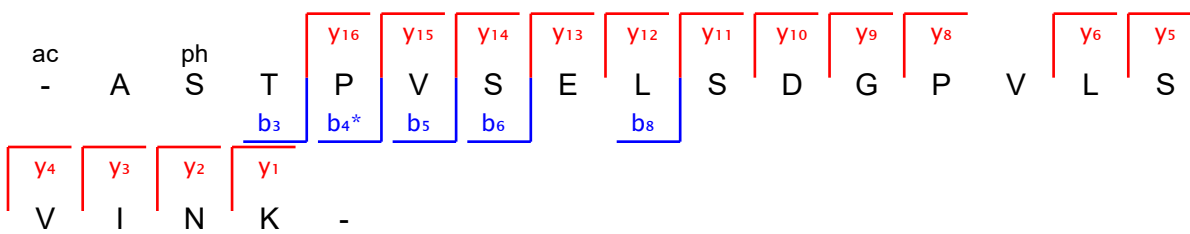

Raw file Scan Method Score m/z  
 sys\_15\_1 5077 FTMS; HCD 80.71 461.72

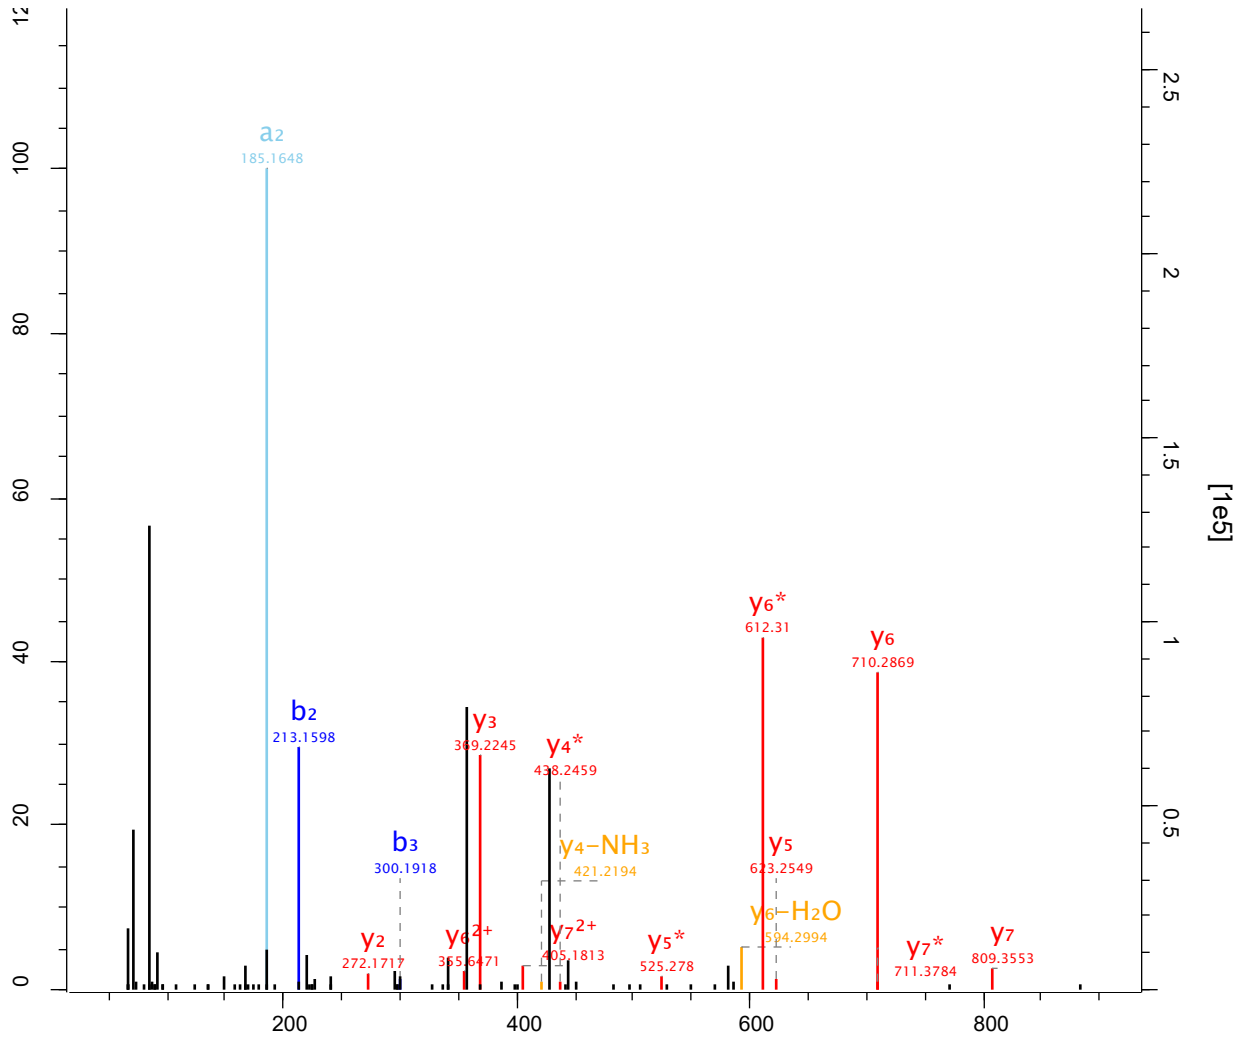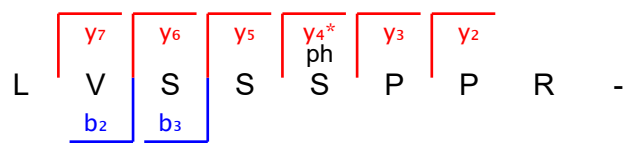

| Raw file | Scan | Method    | Score  | m/z   |
|----------|------|-----------|--------|-------|
| sys_15_1 | 5107 | FTMS; HCD | 108.74 | 472.7 |

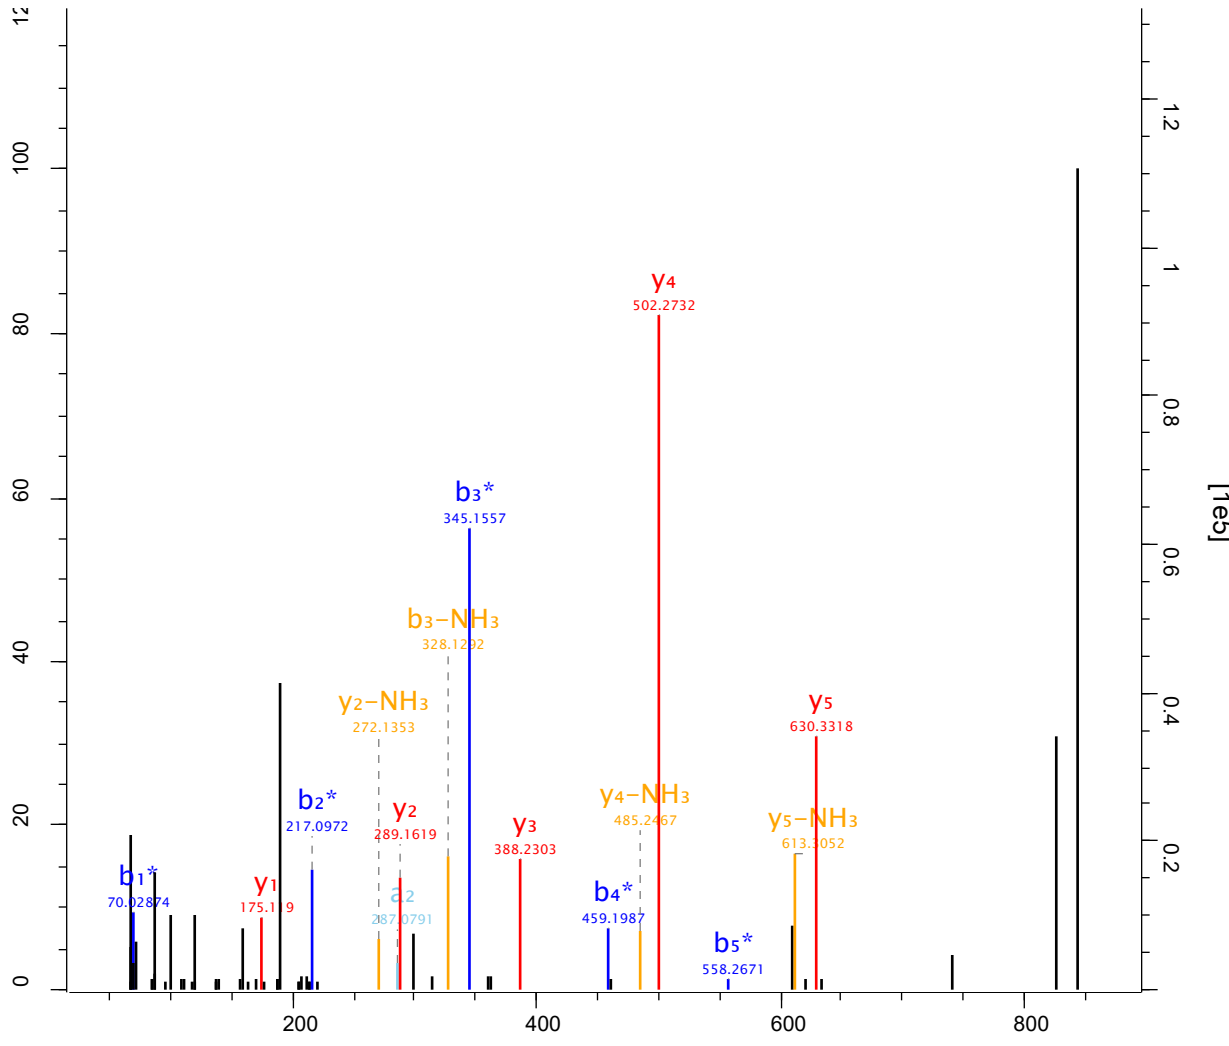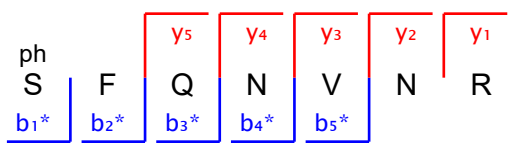

Raw file Scan Method Score m/z  
 sys\_15\_1 5137 FTMS; HCD 64.1 451.69

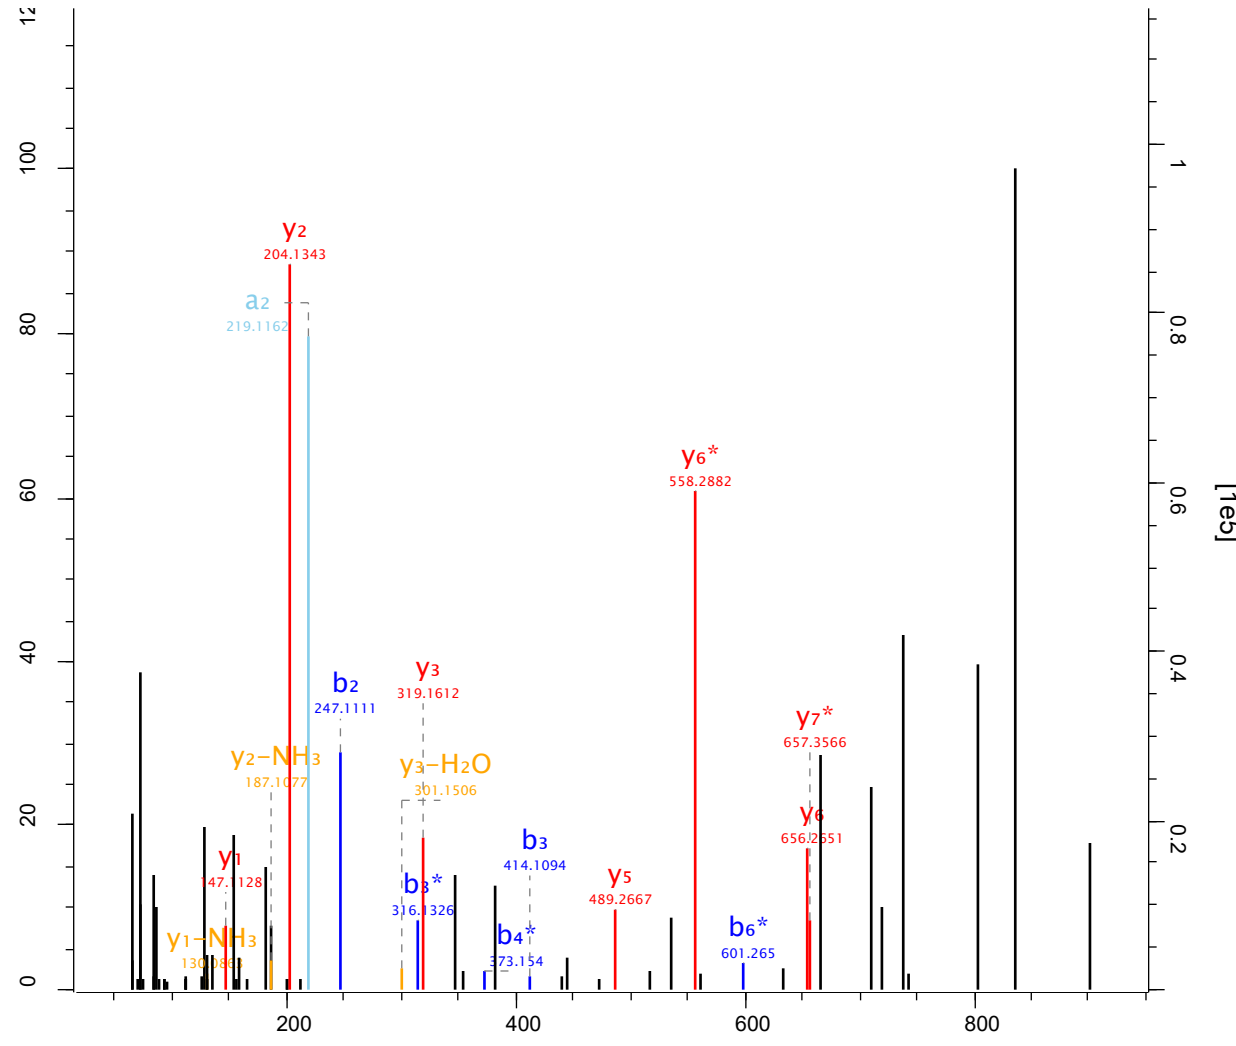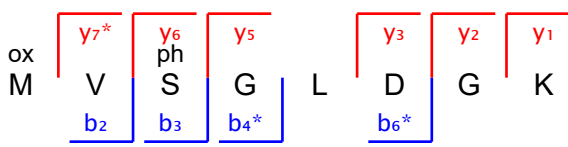

Raw file Scan Method Score m/z  
 sys\_15\_1 5155 FTMS; HCD 83.05 532.26

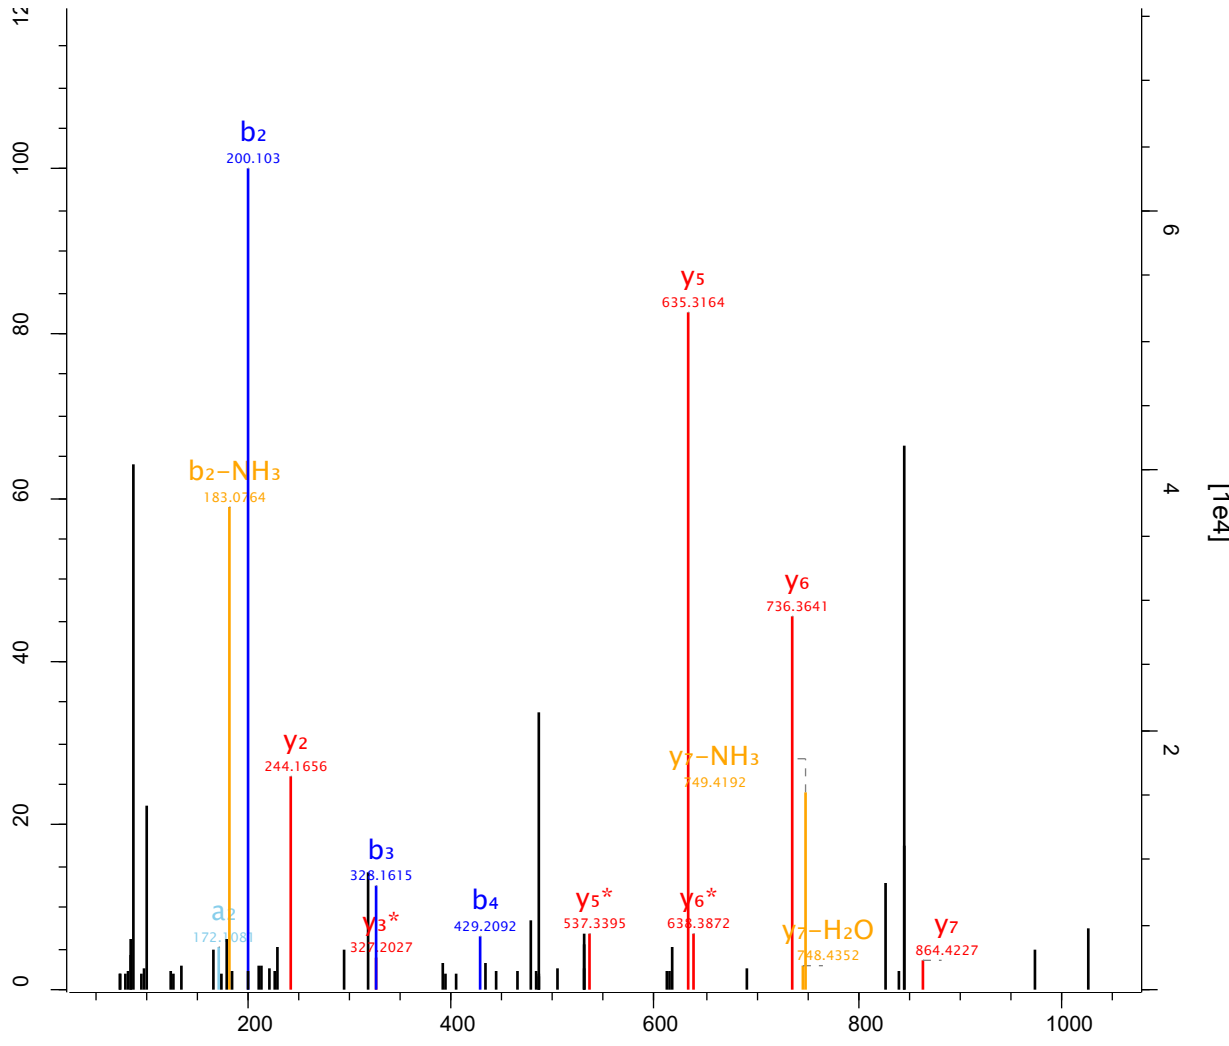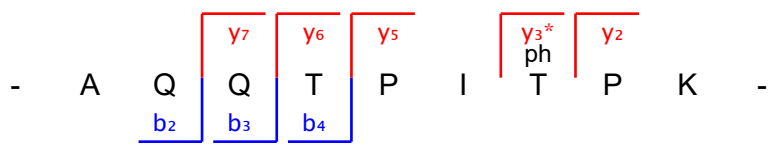

Raw file Scan Method Score m/z  
 sys\_15\_1 5170 FTMS; HCD 93.48 656.25

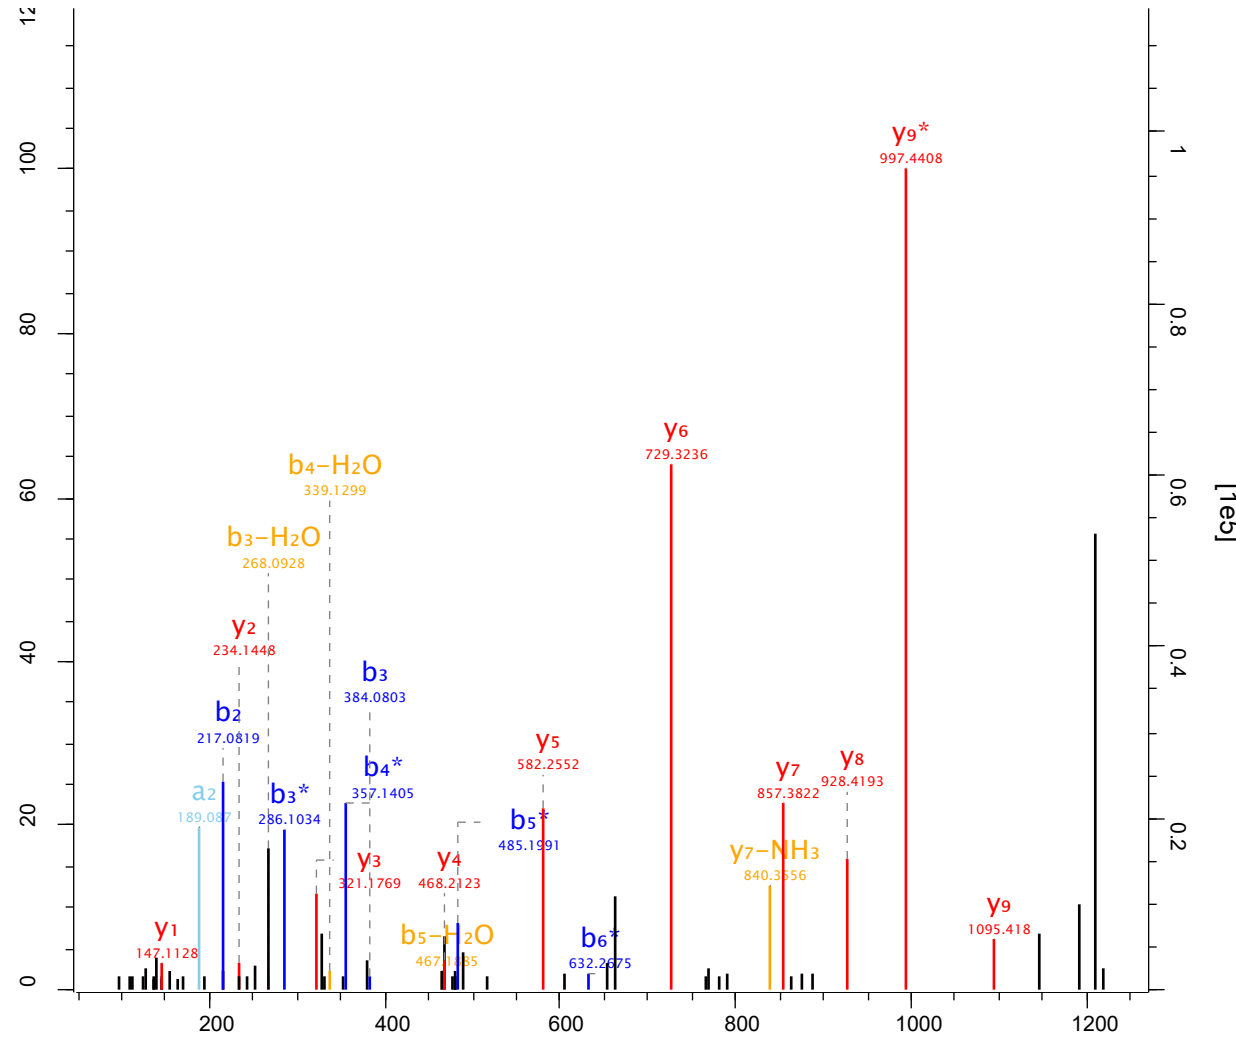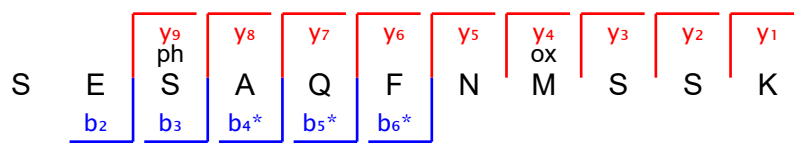

Raw file Scan Method Score m/z  
 sys\_15\_1 5203 FTMS; HCD 86.77 545.23

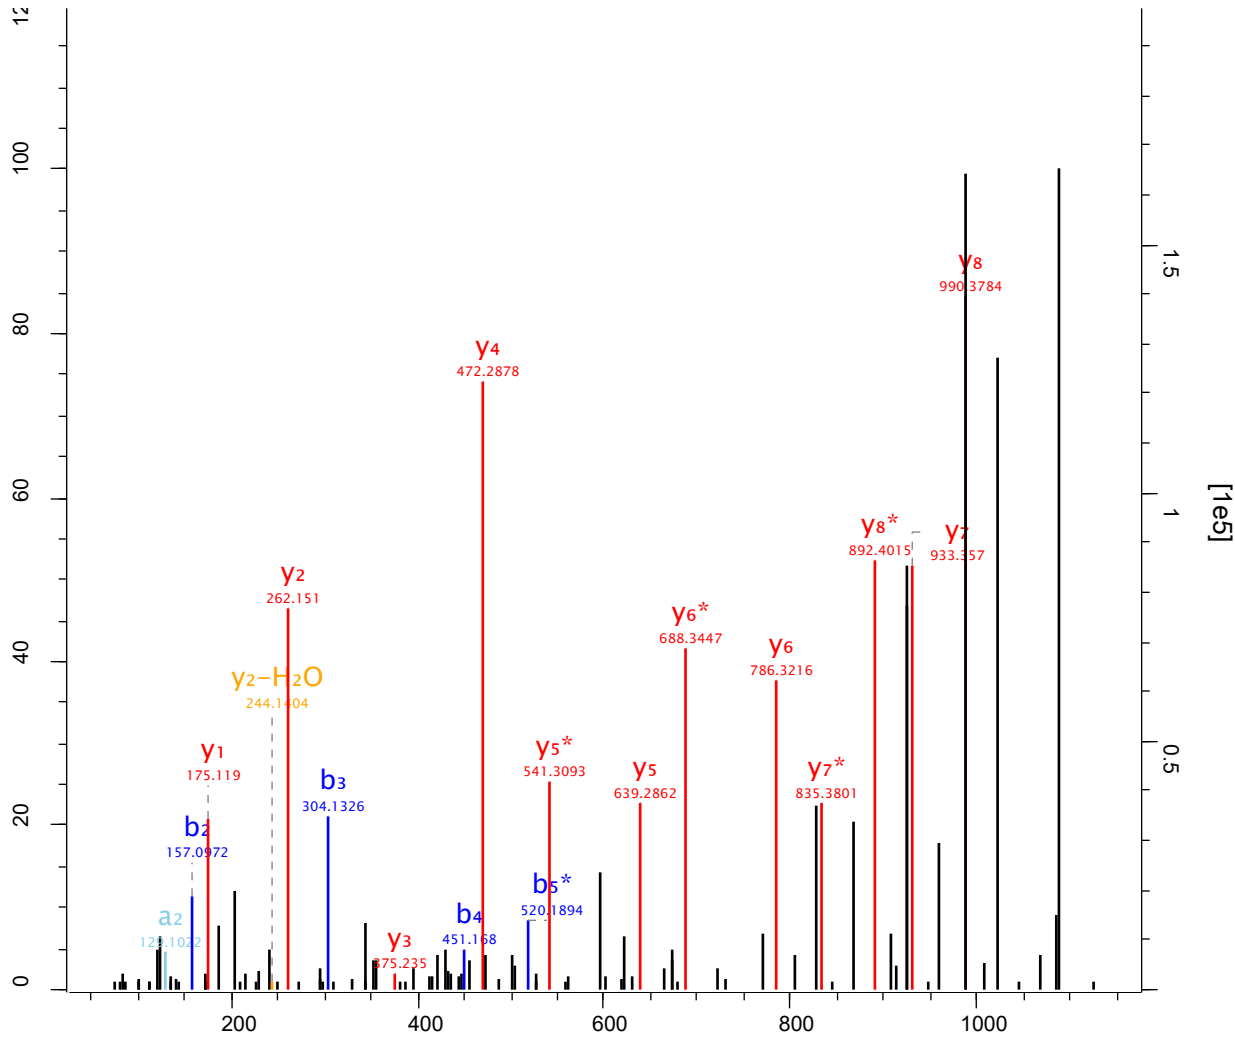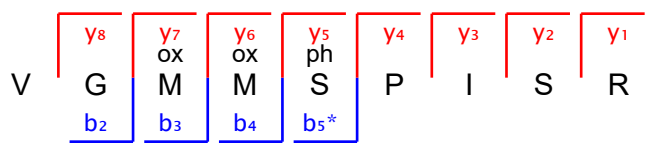

Raw file Scan Method Score m/z  
 sys\_15\_1 5233 FTMS; HCD 102.52 659.25

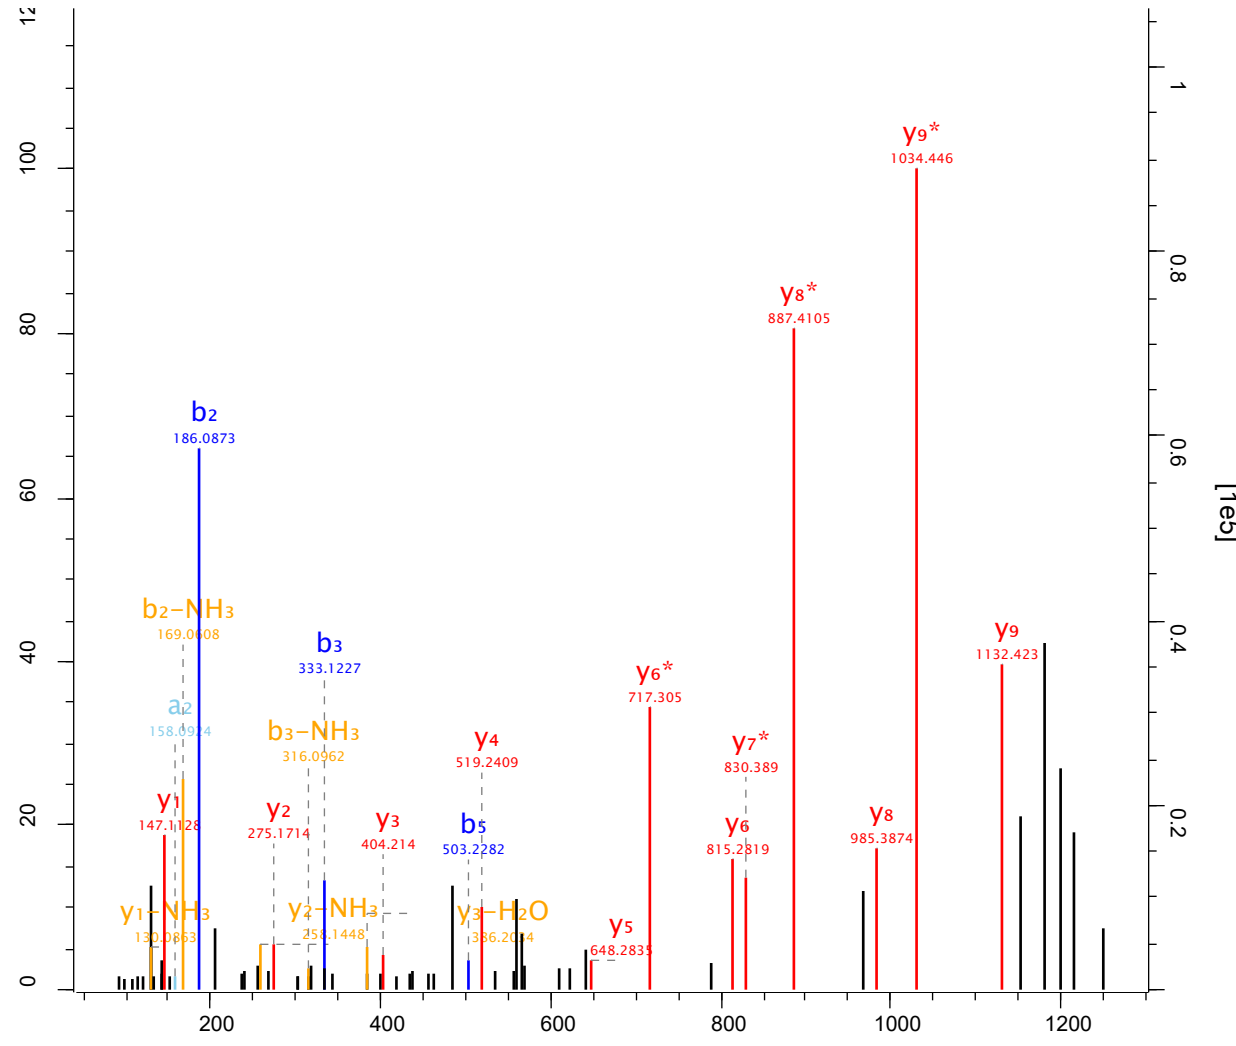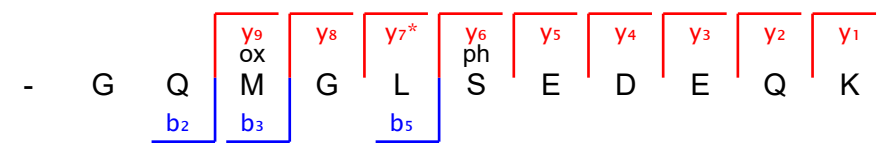



Raw file Scan Method Score m/z  
 sys\_15\_1 5280 FTMS; HCD 63.3 847.83

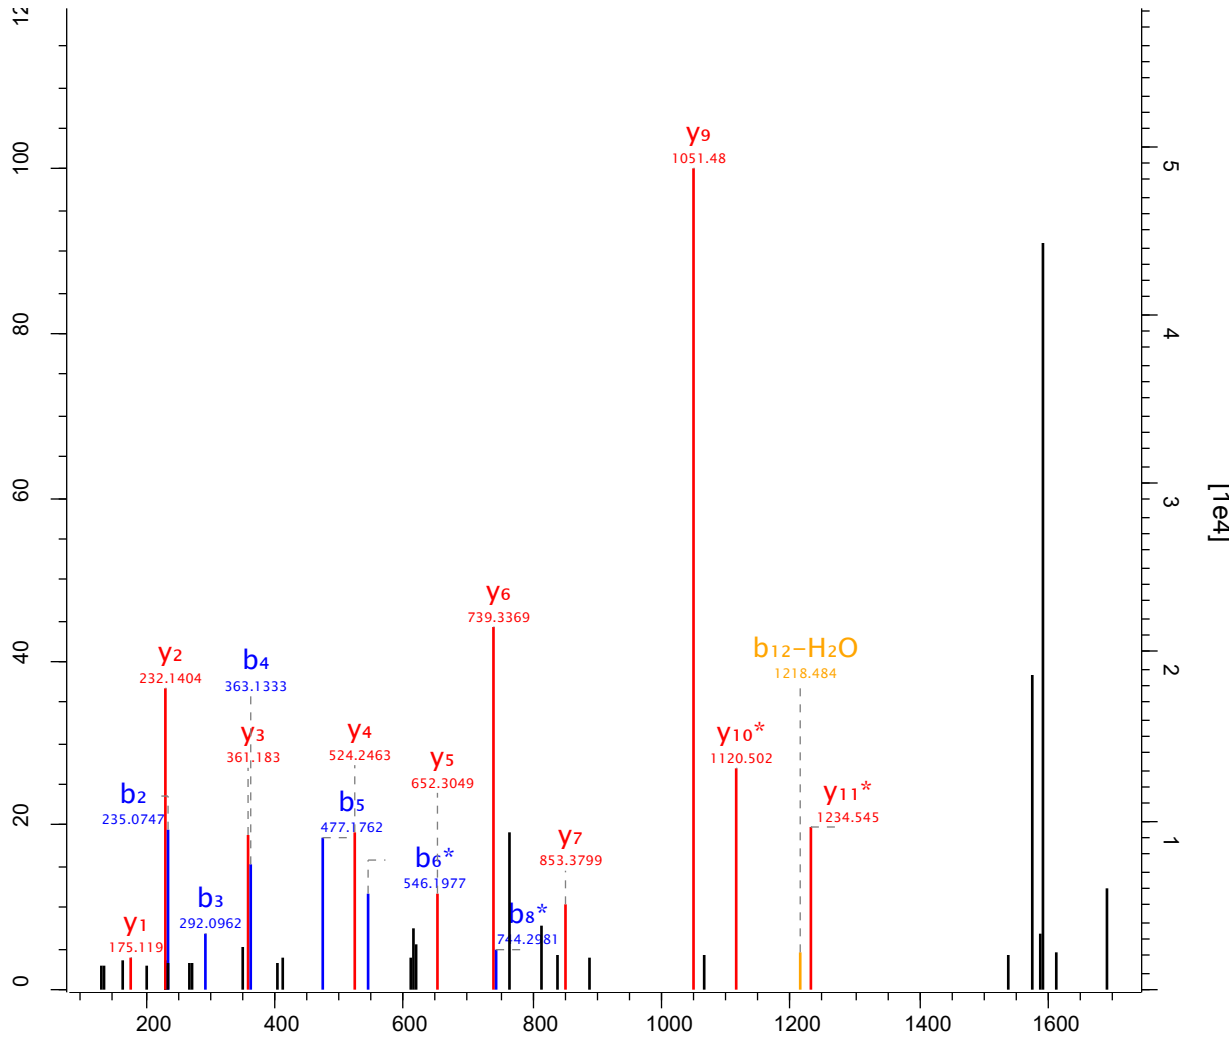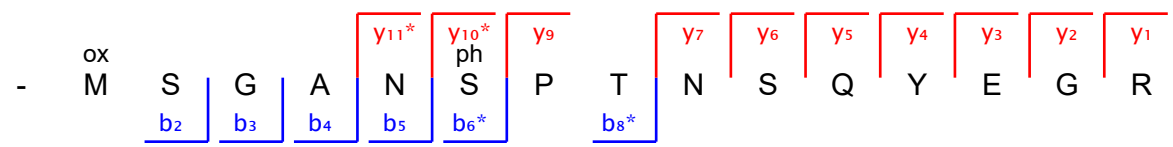

Raw file Scan Method Score m/z  
 sys\_15\_1 5382 FTMS; HCD 65.72 489.7

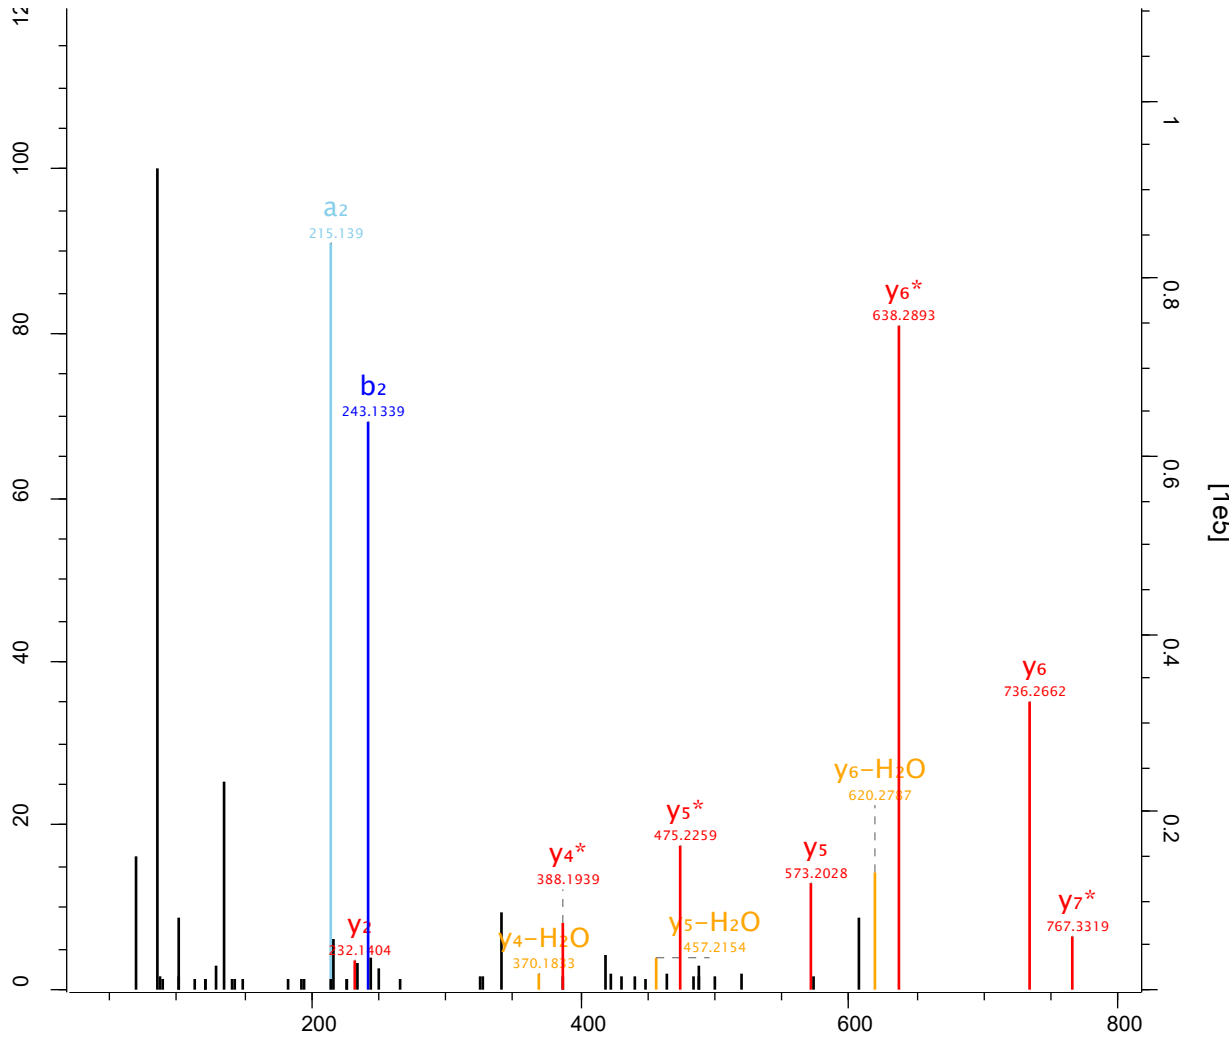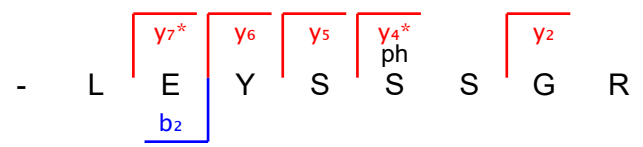

| Raw file | Scan | Method    | Score | m/z    |
|----------|------|-----------|-------|--------|
| sys_15_1 | 5390 | FTMS; HCD | 61.44 | 606.72 |

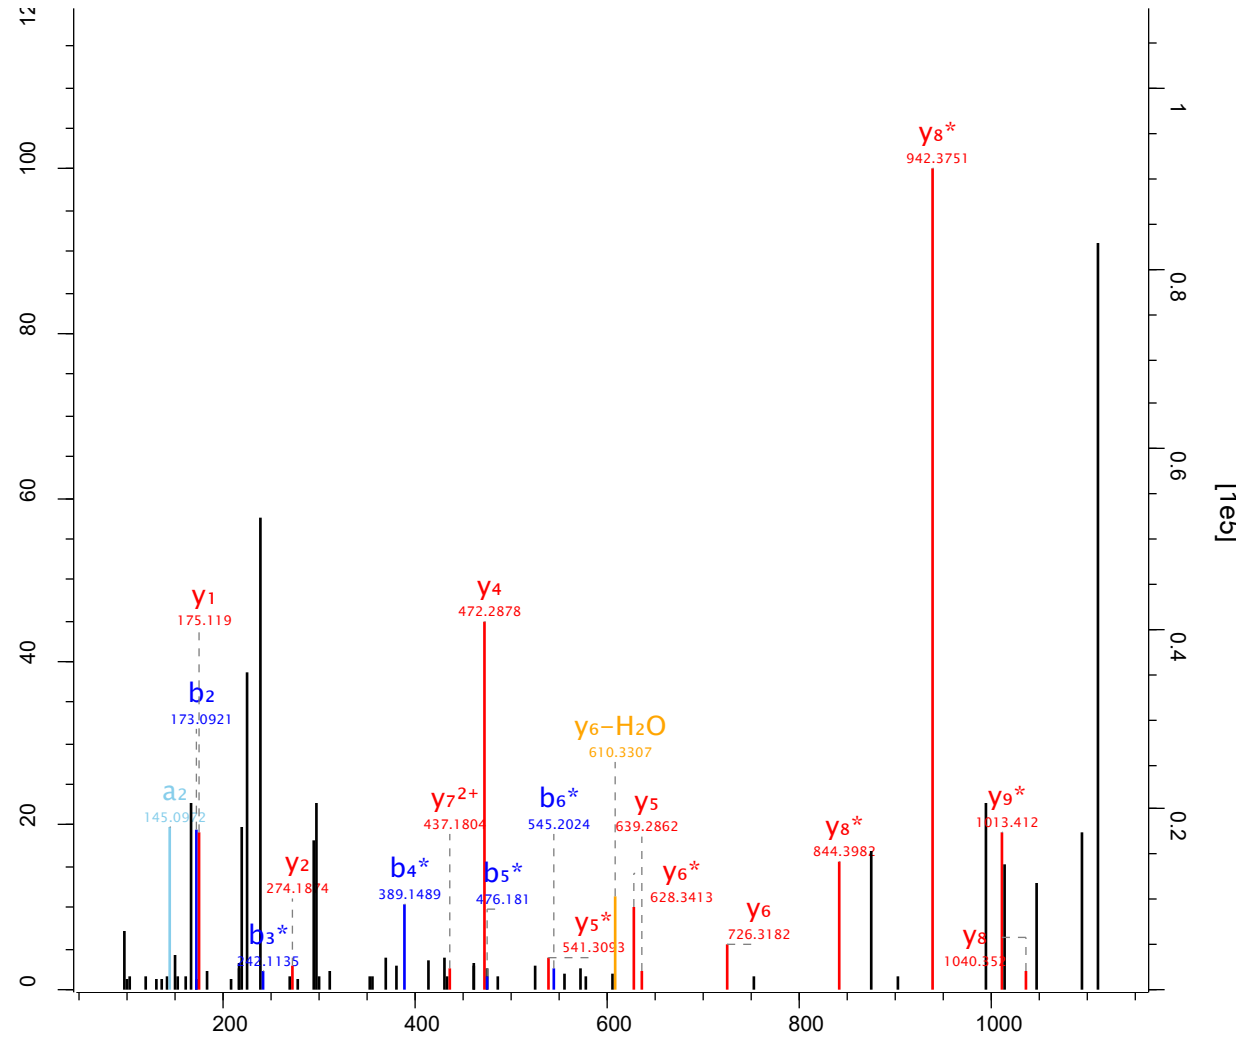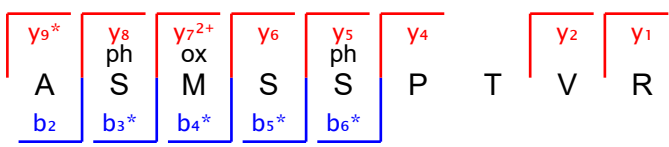

Raw file Scan Method Score m/z  
 sys\_15\_1 5415 FTMS; HCD 71.56 529.23

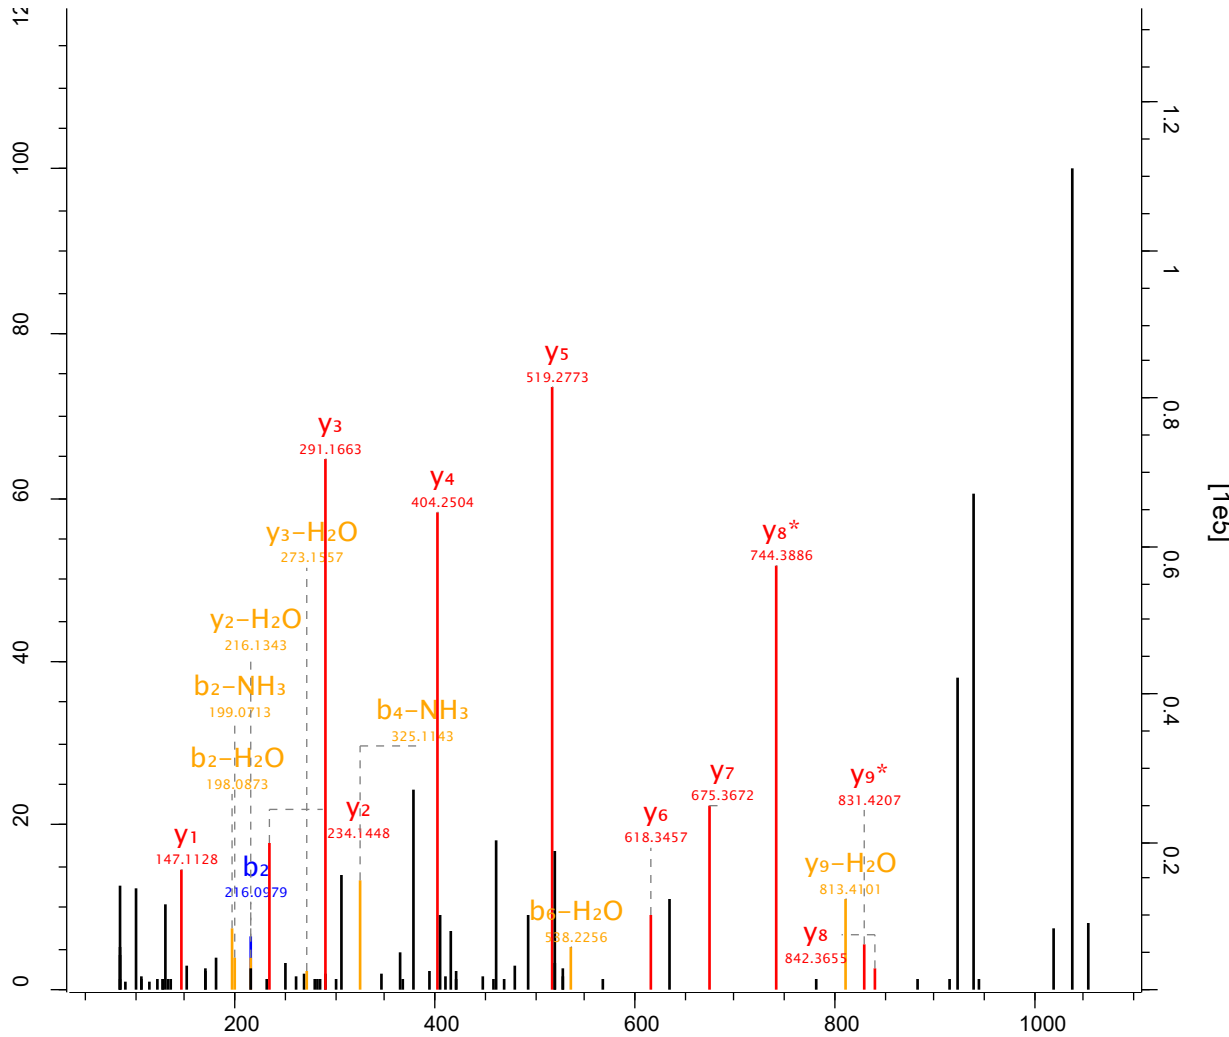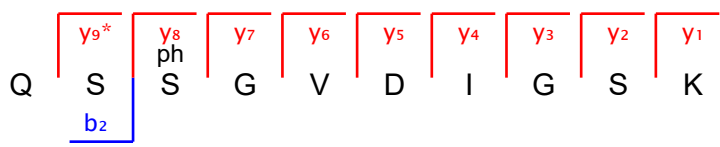

Raw file Scan Method Score m/z  
 sys\_15\_1 5445 FTMS; HCD 107.06 457.71

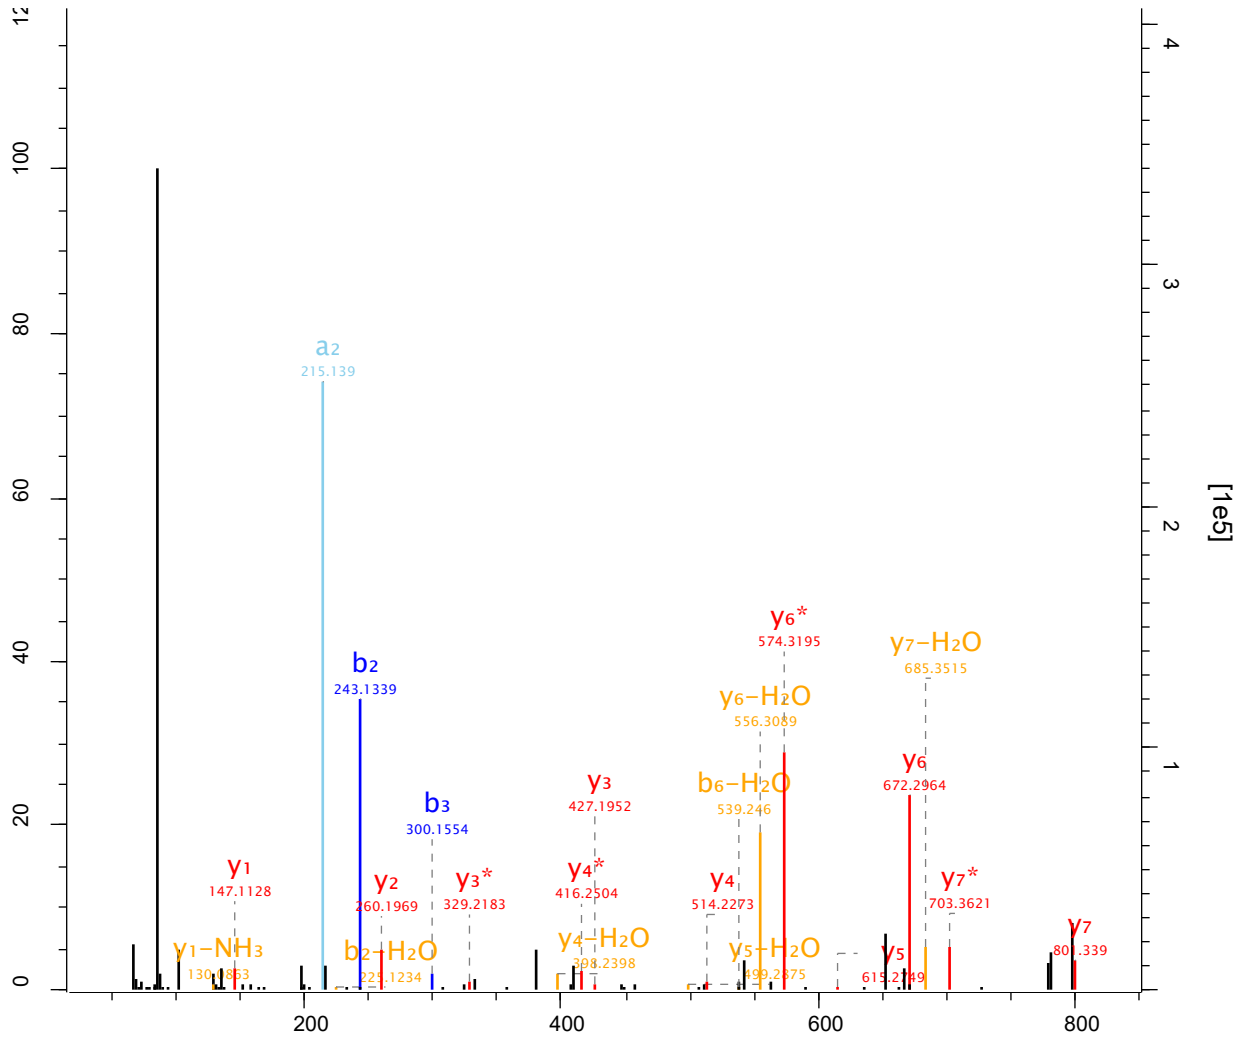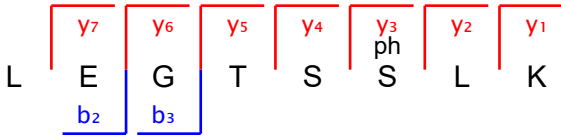

Raw file Scan Method Score m/z  
 sys\_15\_1 5463 FTMS; HCD 103.67 541.24

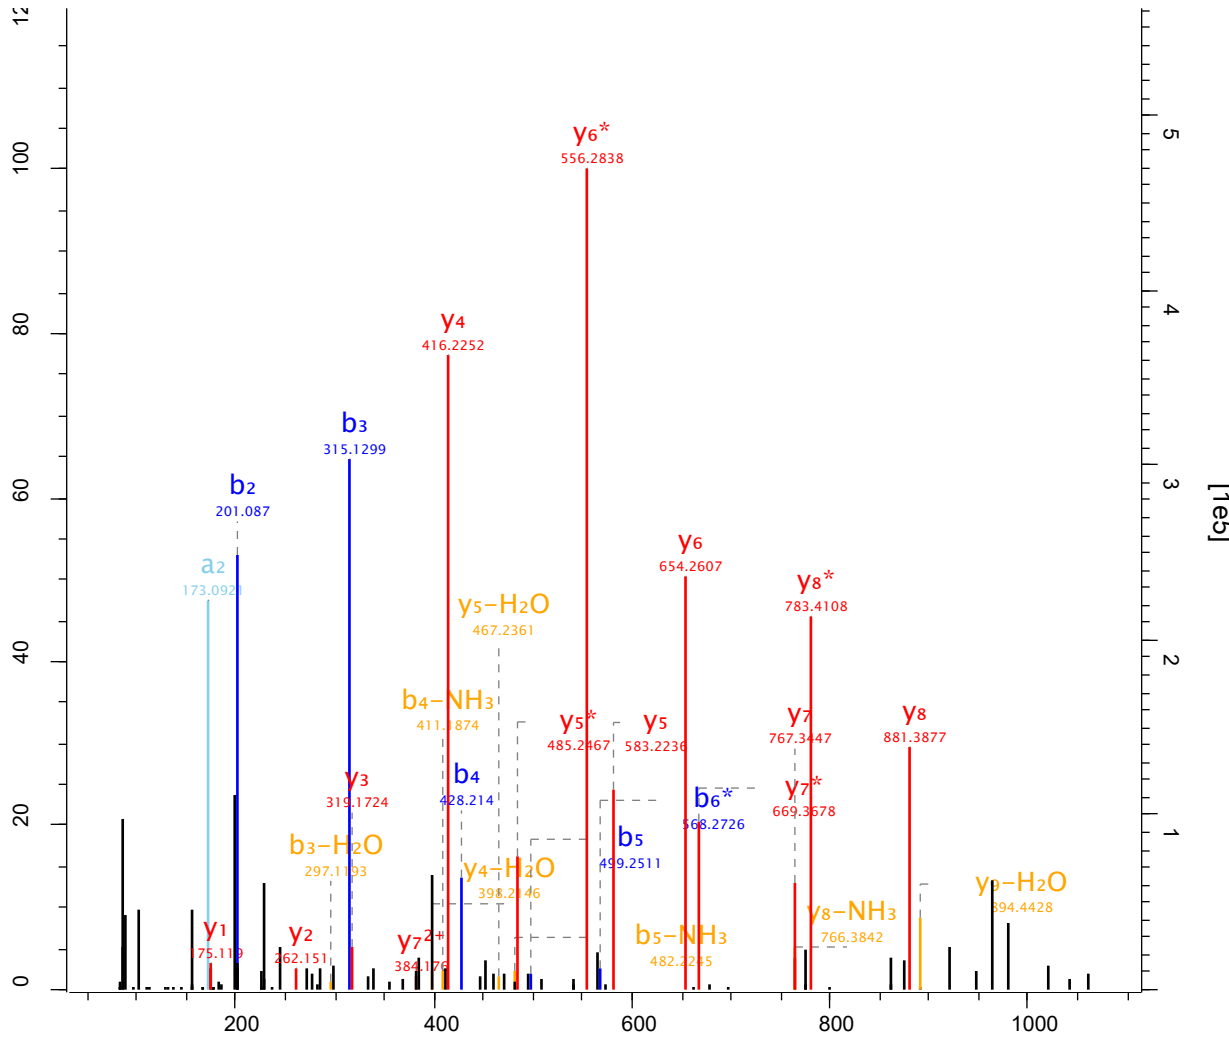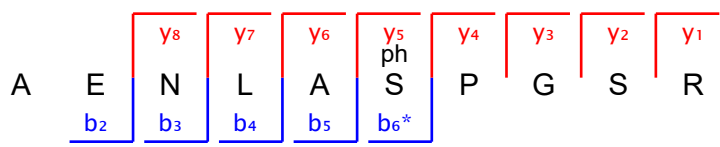

Raw file Scan Method Score m/z  
 sys\_15\_1 5653 FTMS; HCD 150.22 578.24

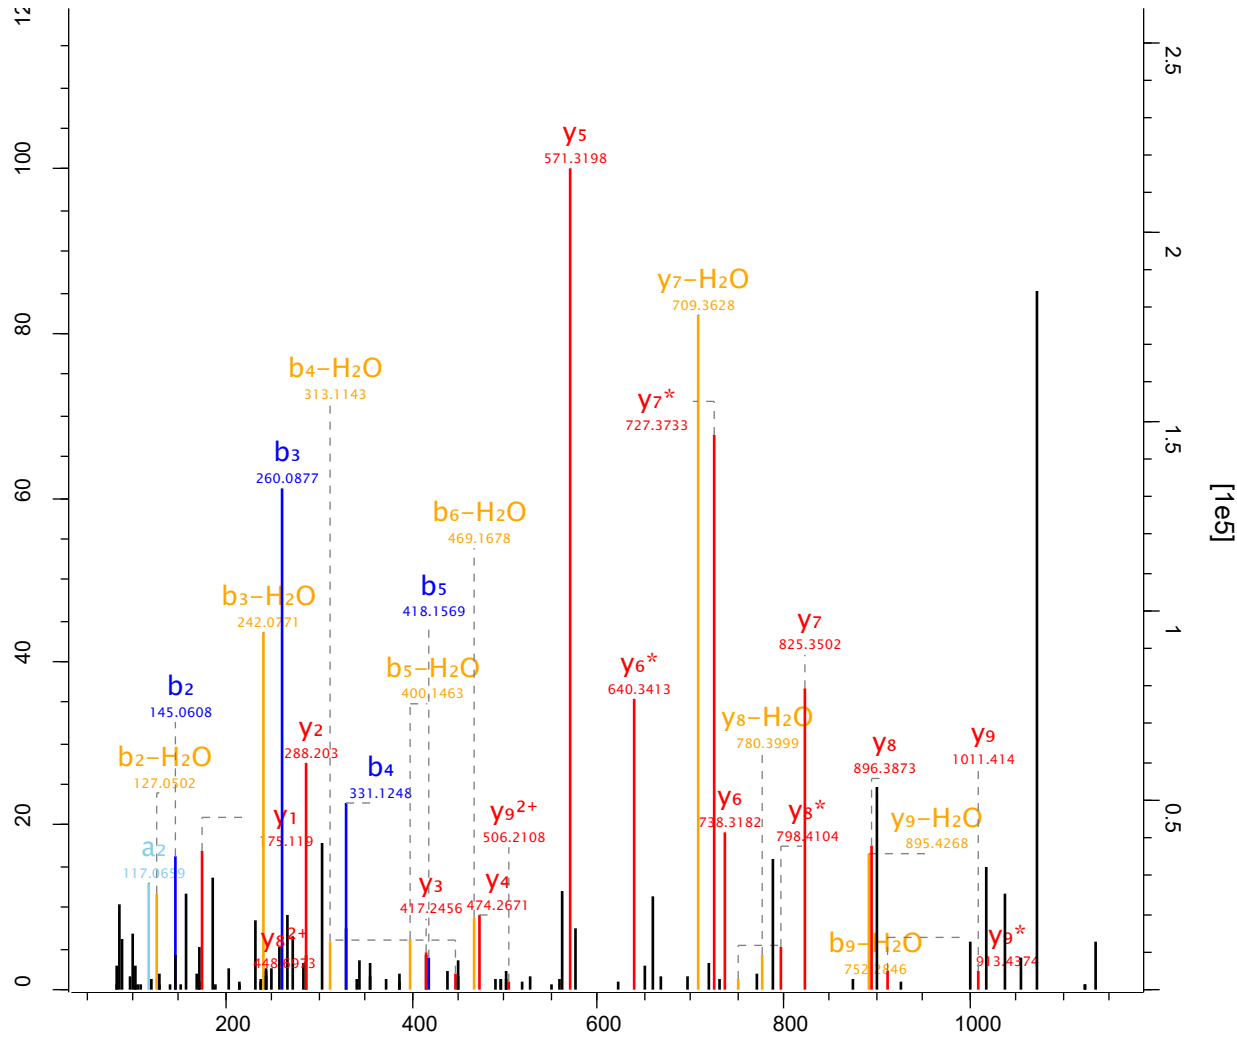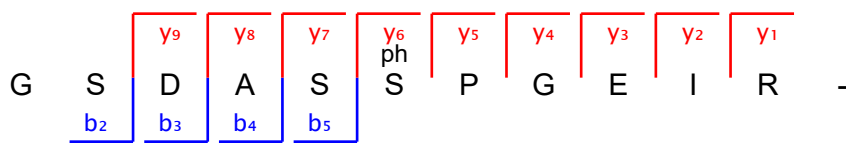

Raw file Scan Method Score m/z  
 sys\_15\_1 5754 FTMS; HCD 92.87 462.7

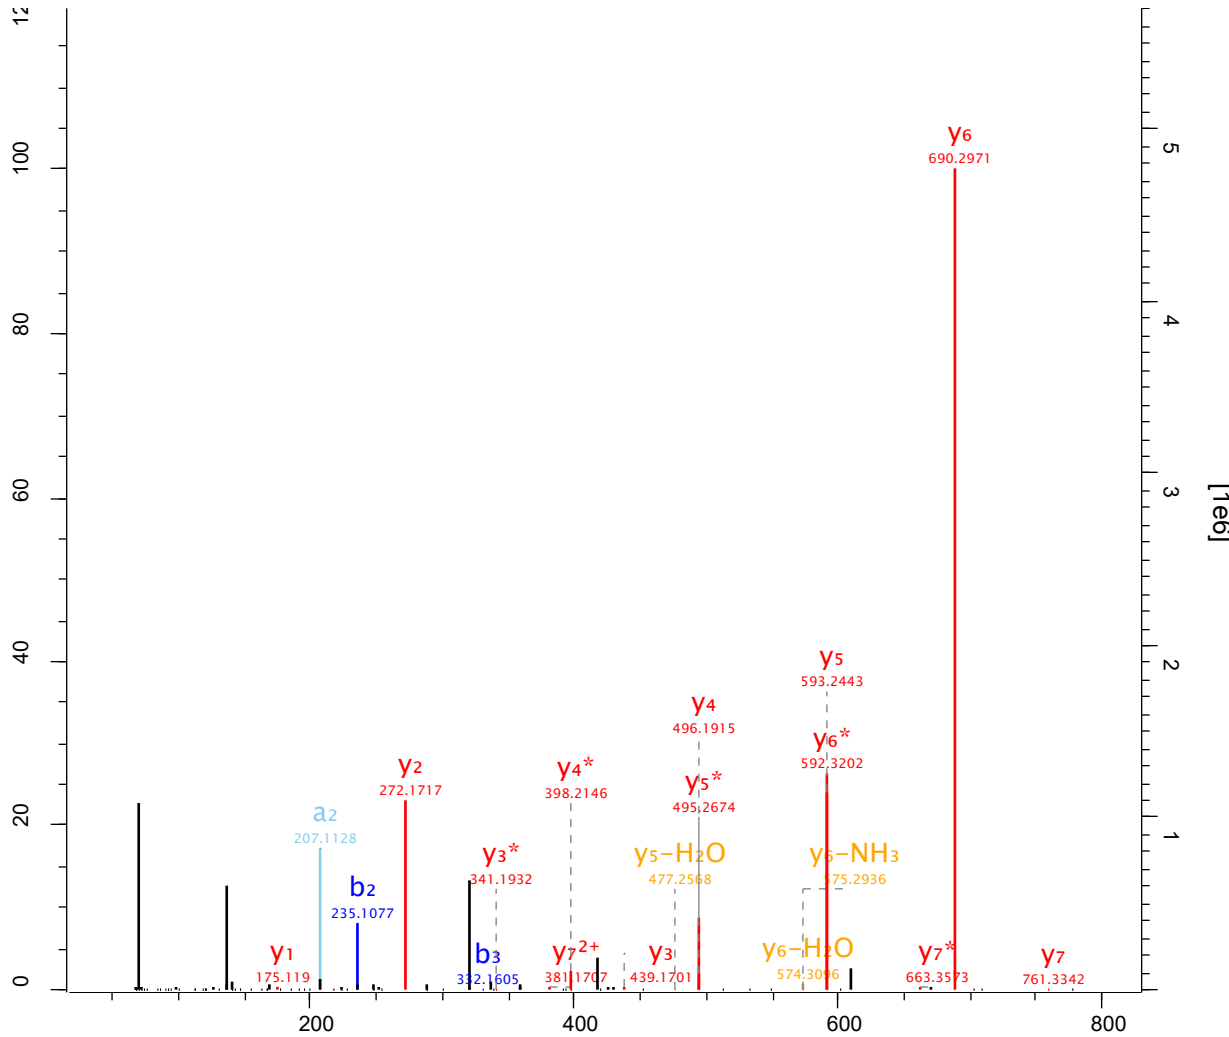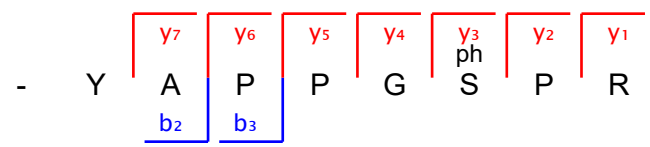



Raw file Scan Method Score m/z  
 sys\_15\_1 5758 FTMS; HCD 112.36 496.69

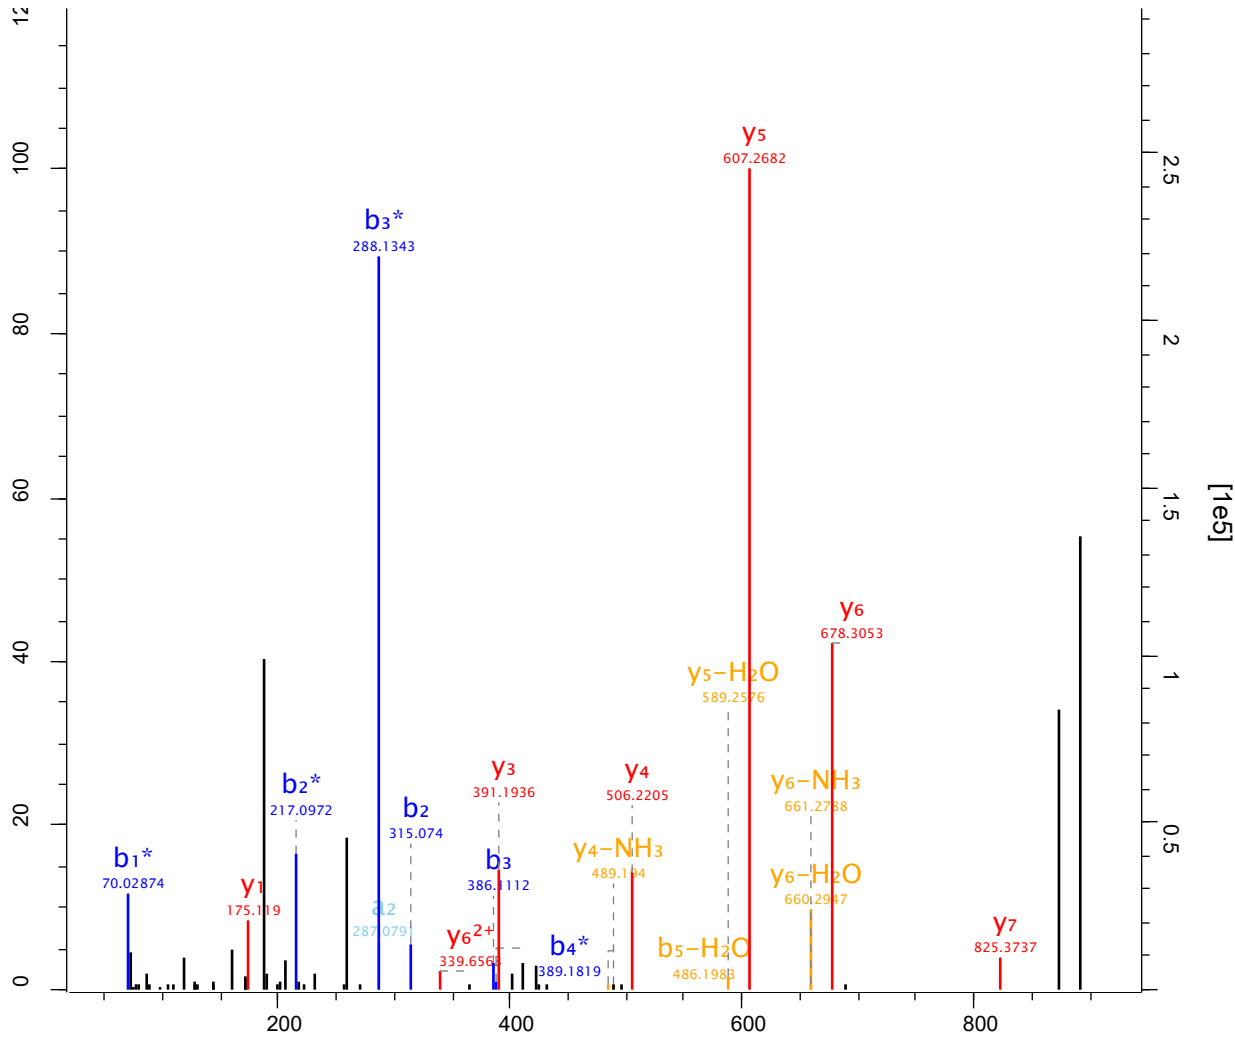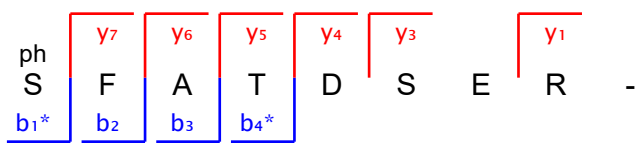

Raw file Scan Method Score m/z  
 sys\_15\_1 5771 FTMS; HCD 143.25 525.26

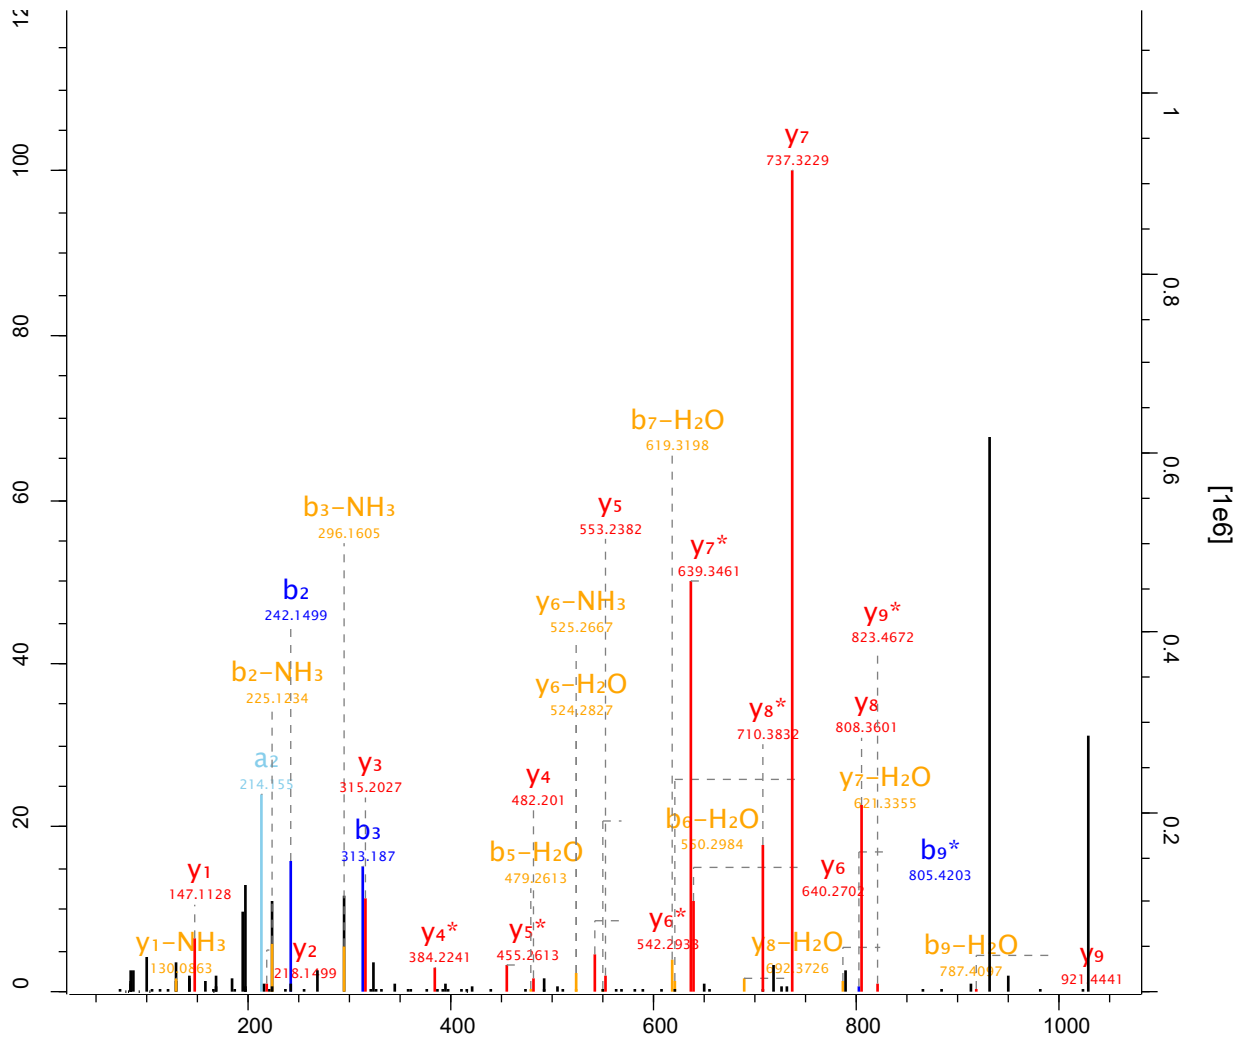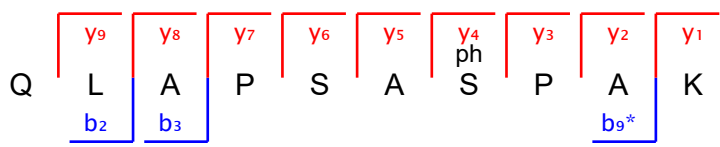

Raw file Scan Method Score m/z  
 sys\_15\_1 5791 FTMS; HCD 216.01 635.76

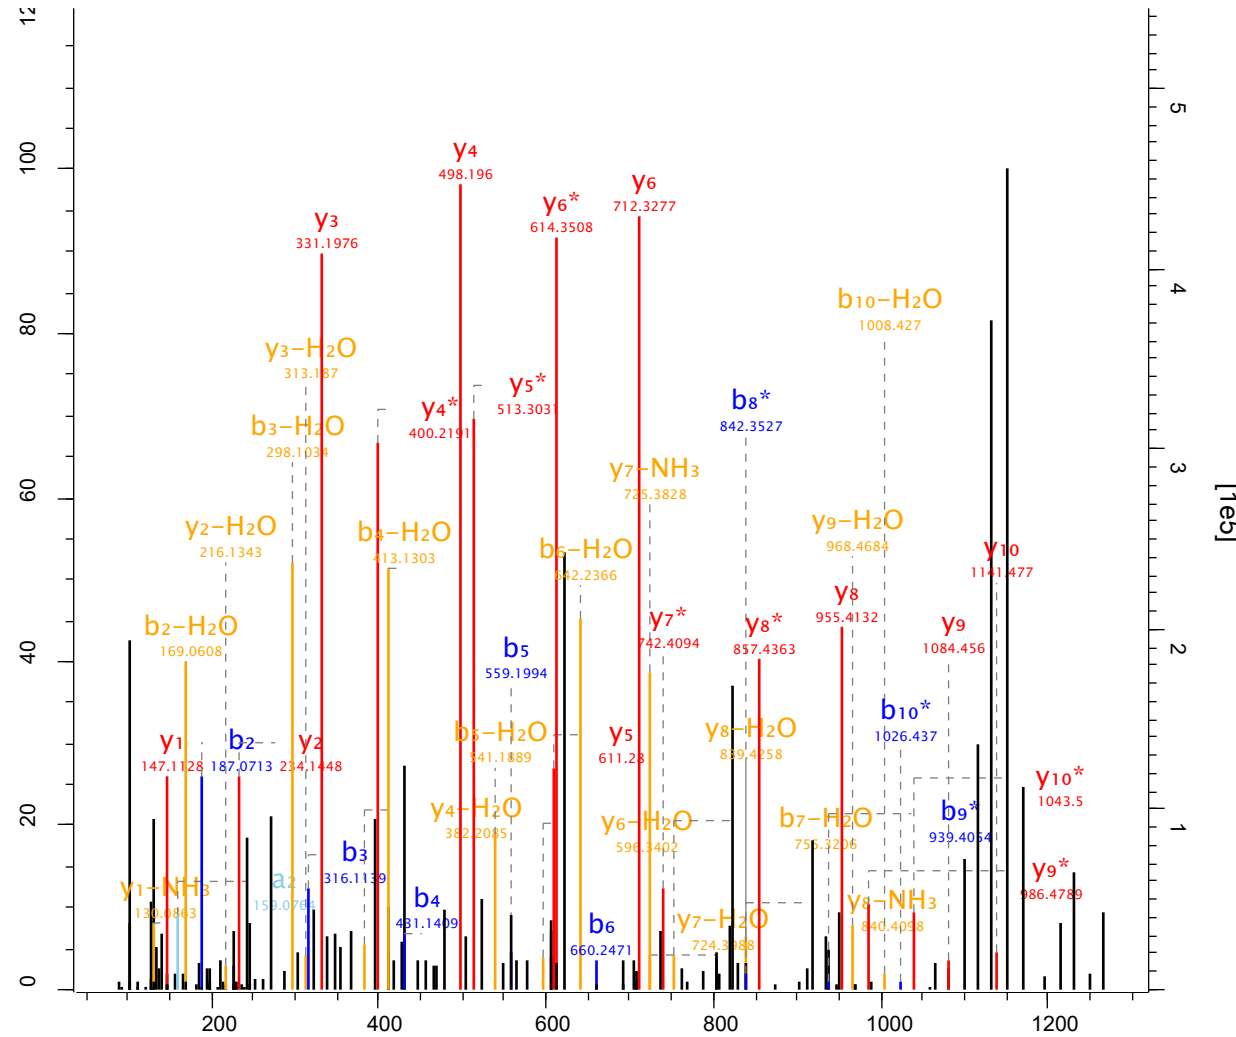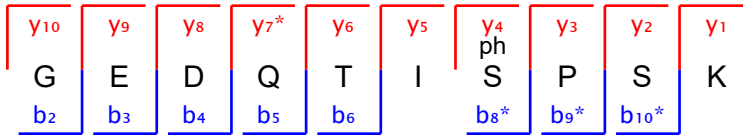

Raw file Scan Method Score m/z  
 sys\_15\_1 5796 FTMS; HCD 158.47 580.24

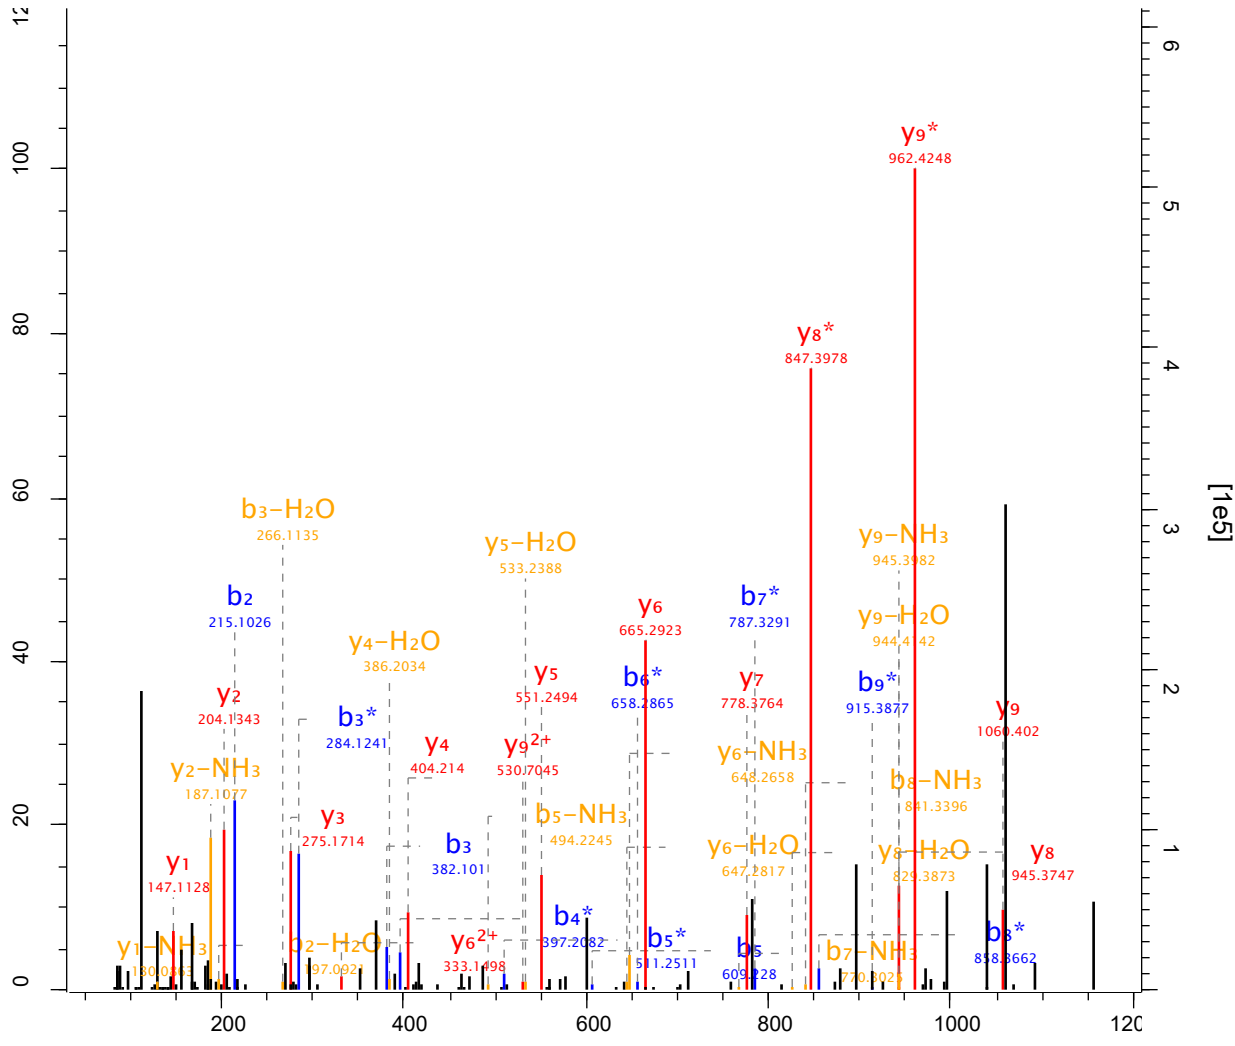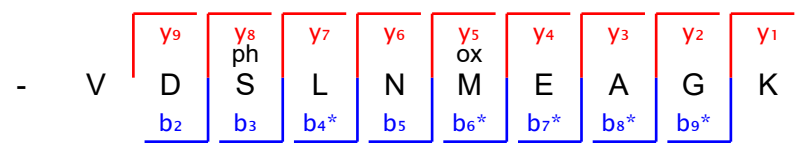

| Raw file | Scan | Method    | Score | m/z    |
|----------|------|-----------|-------|--------|
| sys_15_1 | 5819 | FTMS; HCD | 45.83 | 473.19 |

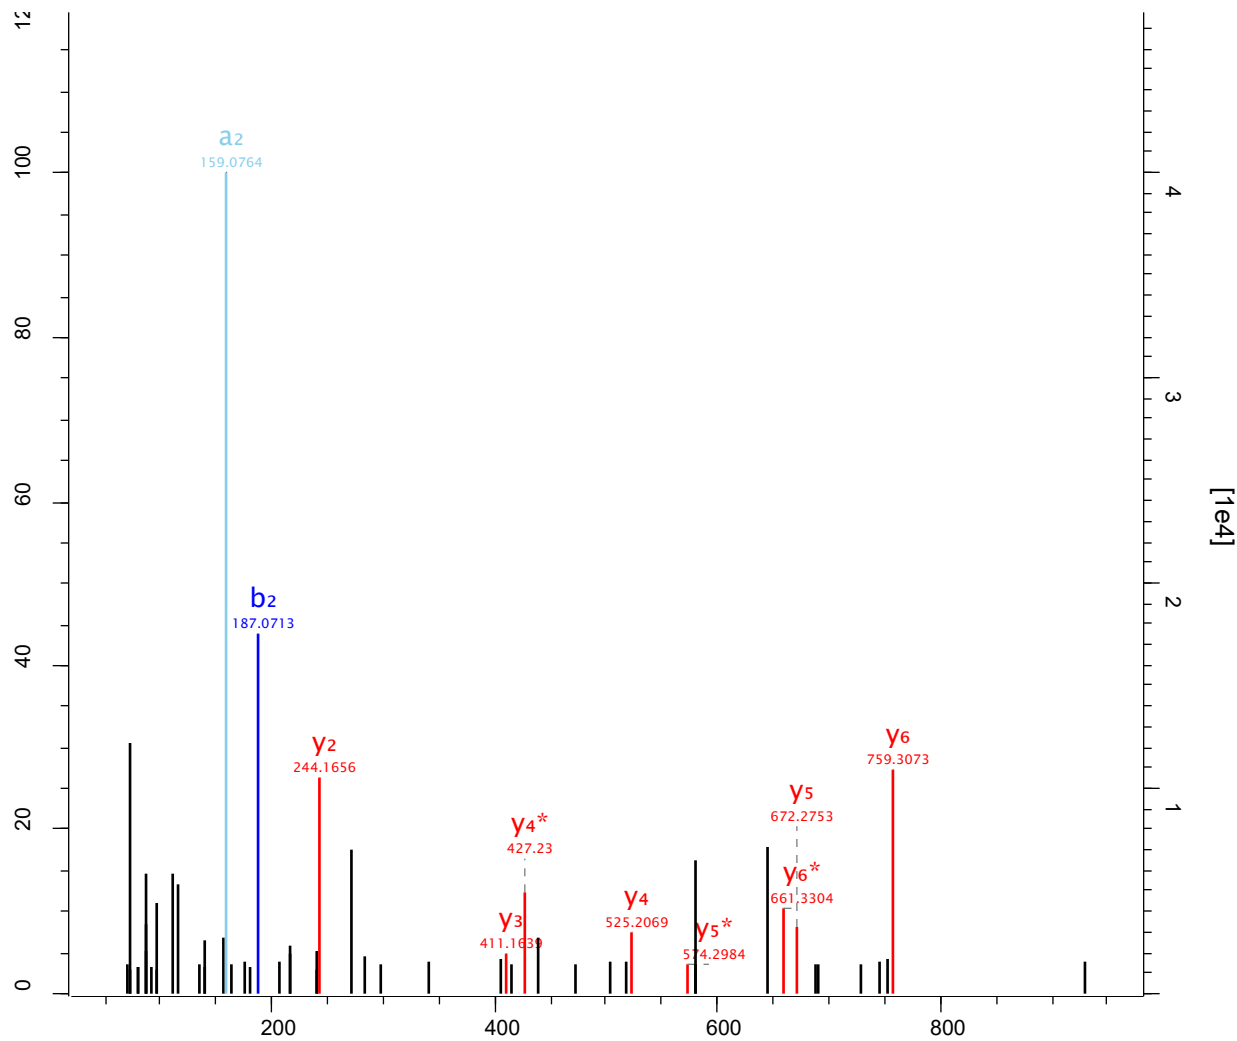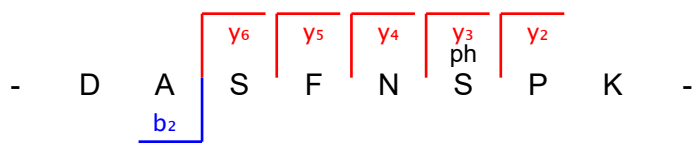

Raw file Scan Method Score m/z  
 sys\_15\_1 5841 FTMS; HCD 96.17 459.7

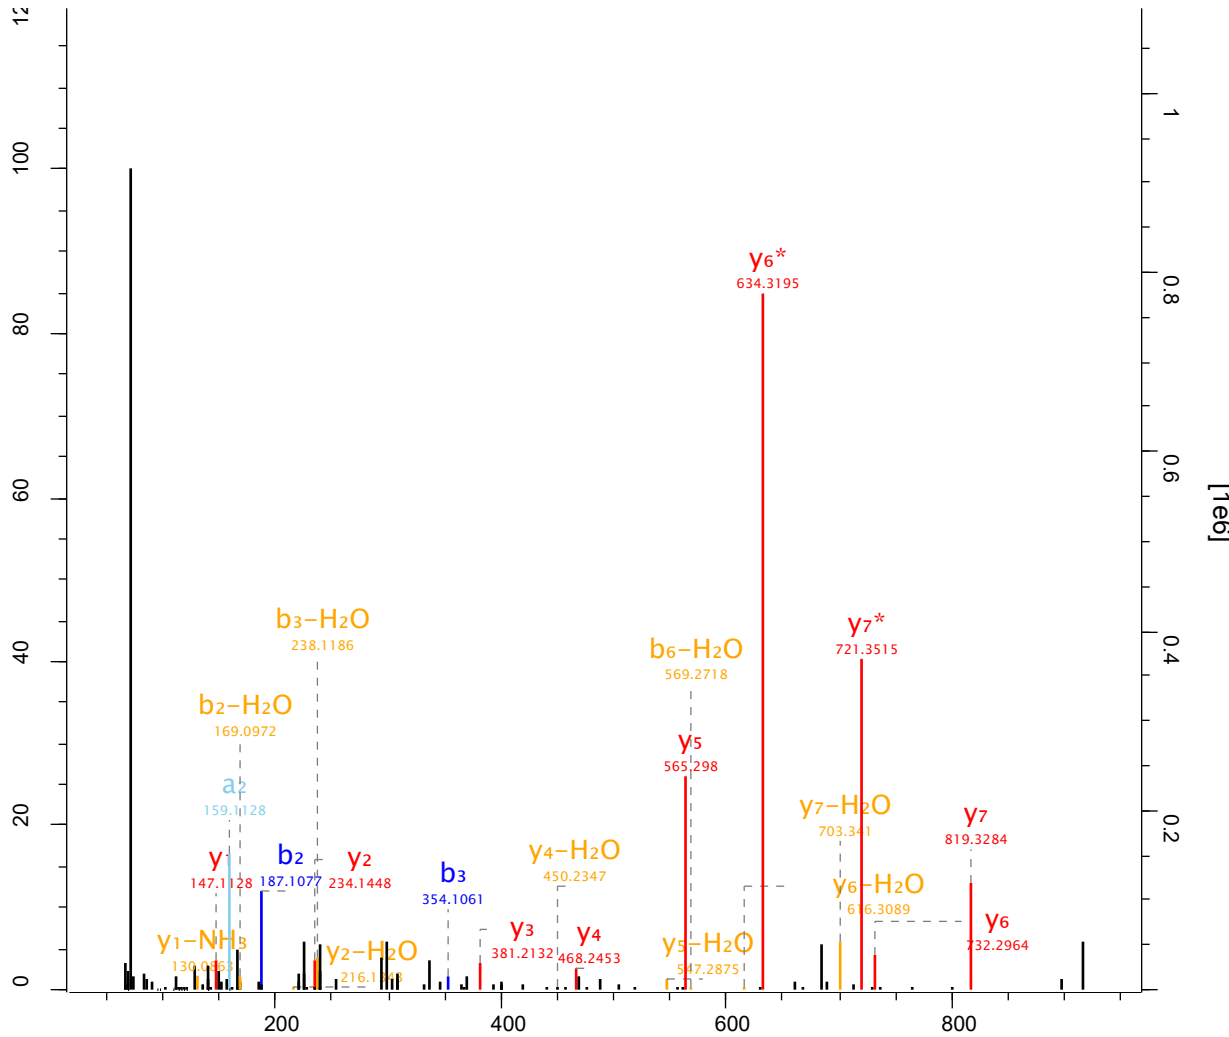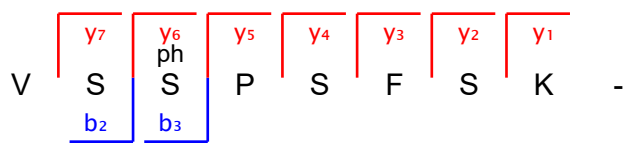

Raw file Scan Method Score m/z  
 sys\_15\_1 5895 FTMS; HCD 50.9 657.76

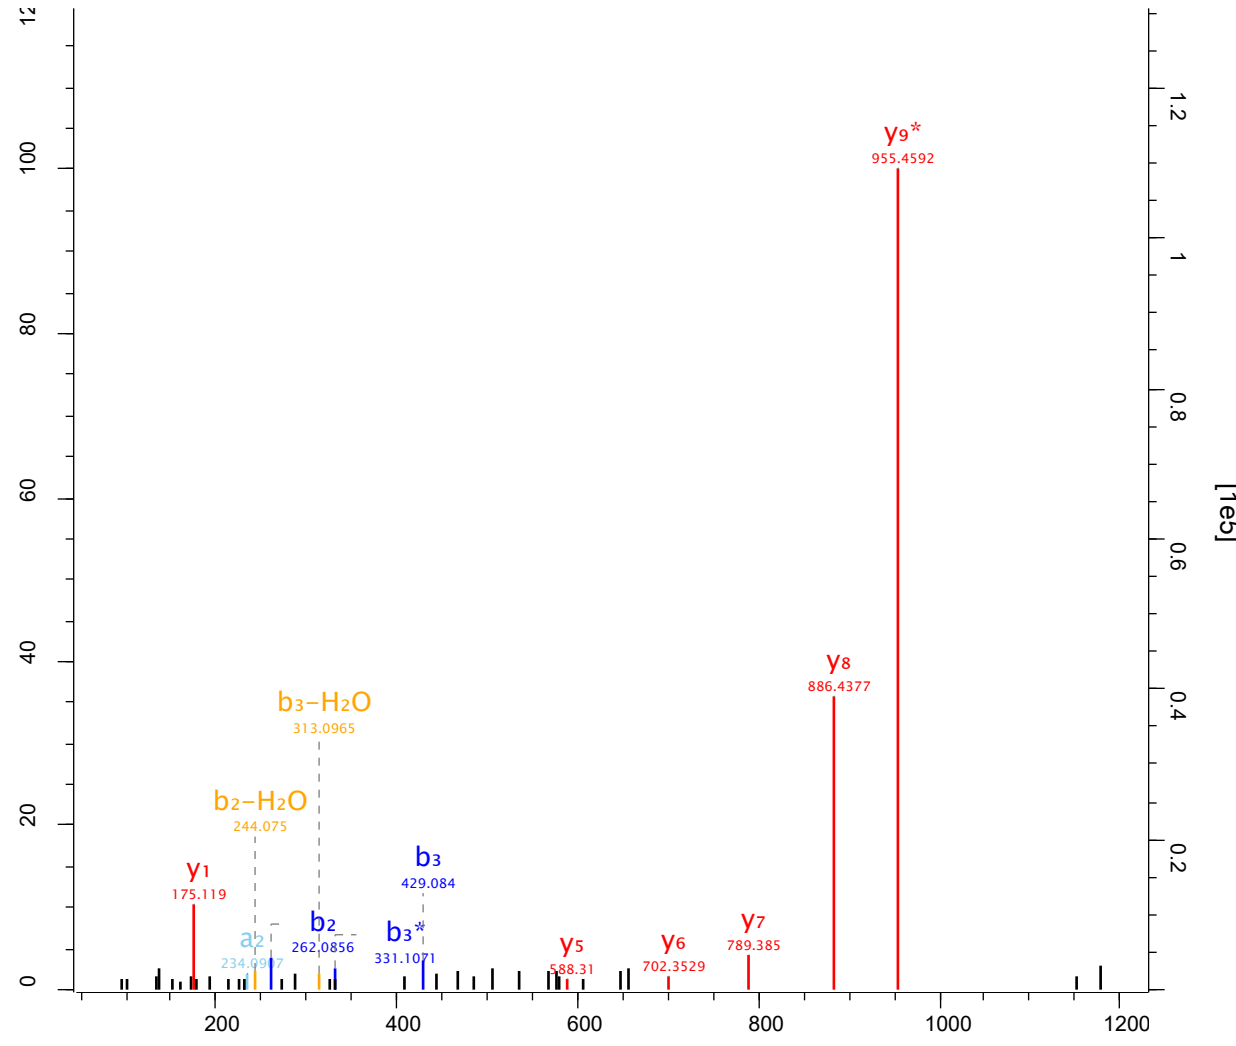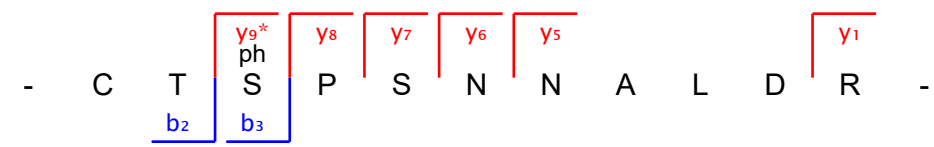

| Raw file | Scan | Method    | Score | m/z    |
|----------|------|-----------|-------|--------|
| sys_15_1 | 5980 | FTMS; HCD | 51.45 | 508.73 |

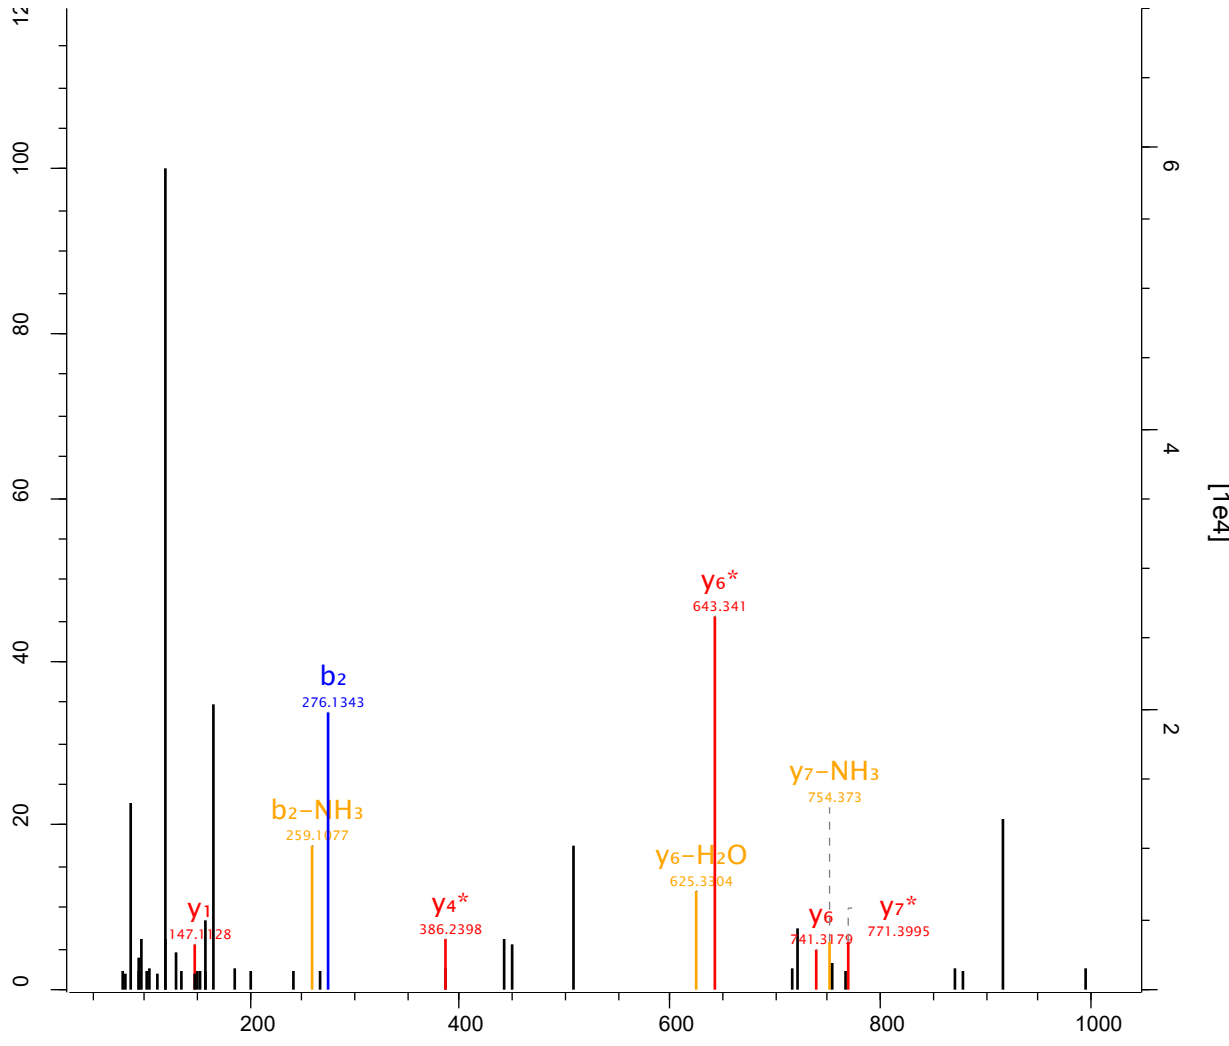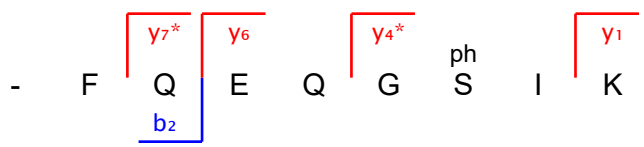



Raw file Scan Method Score m/z  
 sys\_15\_1 6010 FTMS; HCD 123.26 532.21

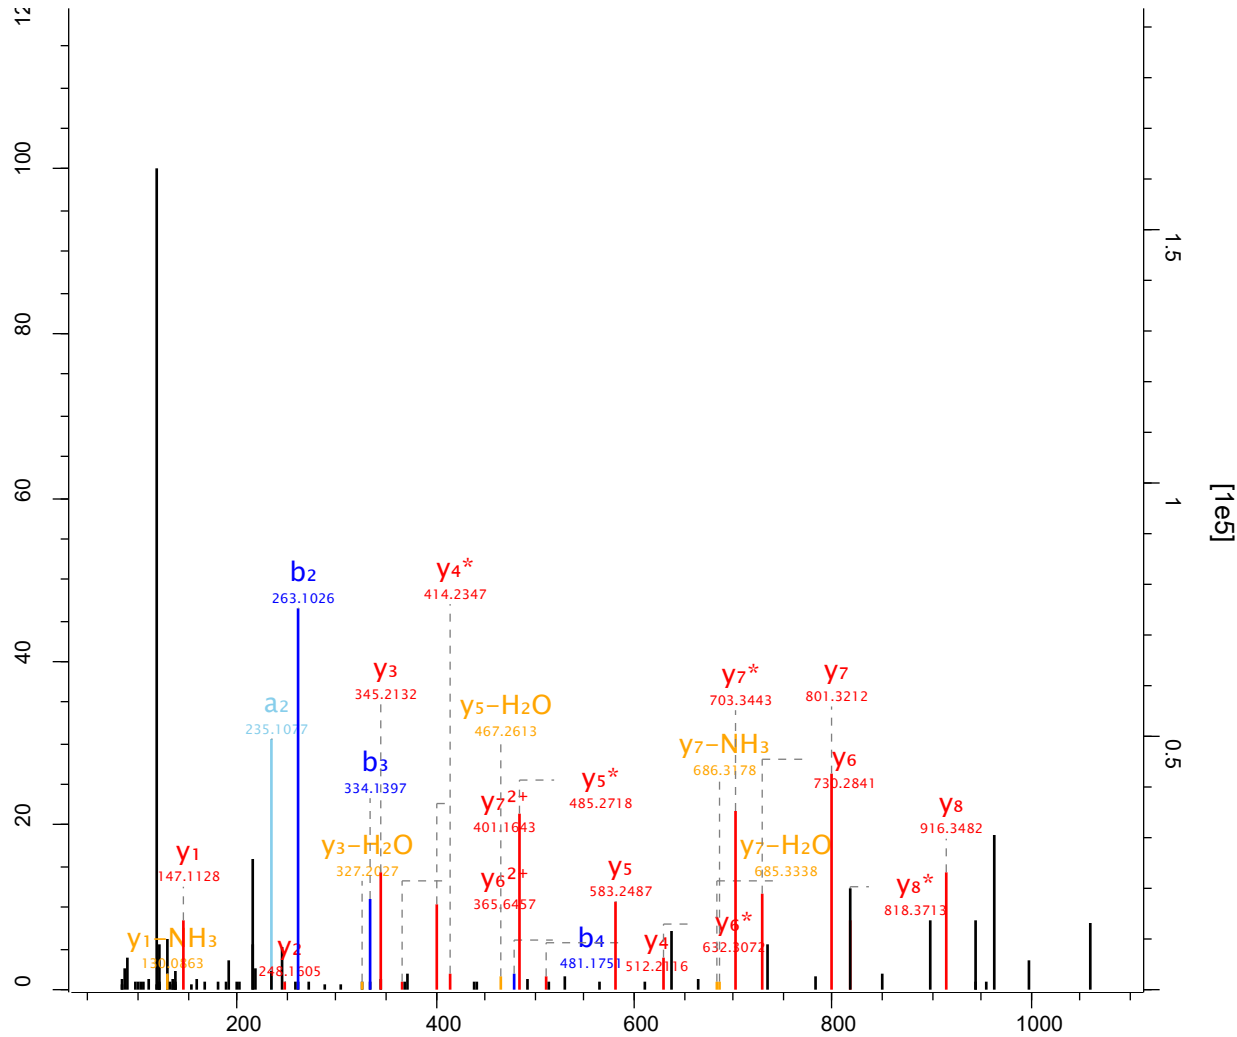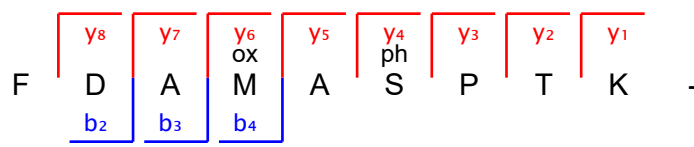

| Raw file | Scan | Method    | Score | m/z    |
|----------|------|-----------|-------|--------|
| sys_15_1 | 6053 | FTMS; HCD | 49.45 | 545.71 |

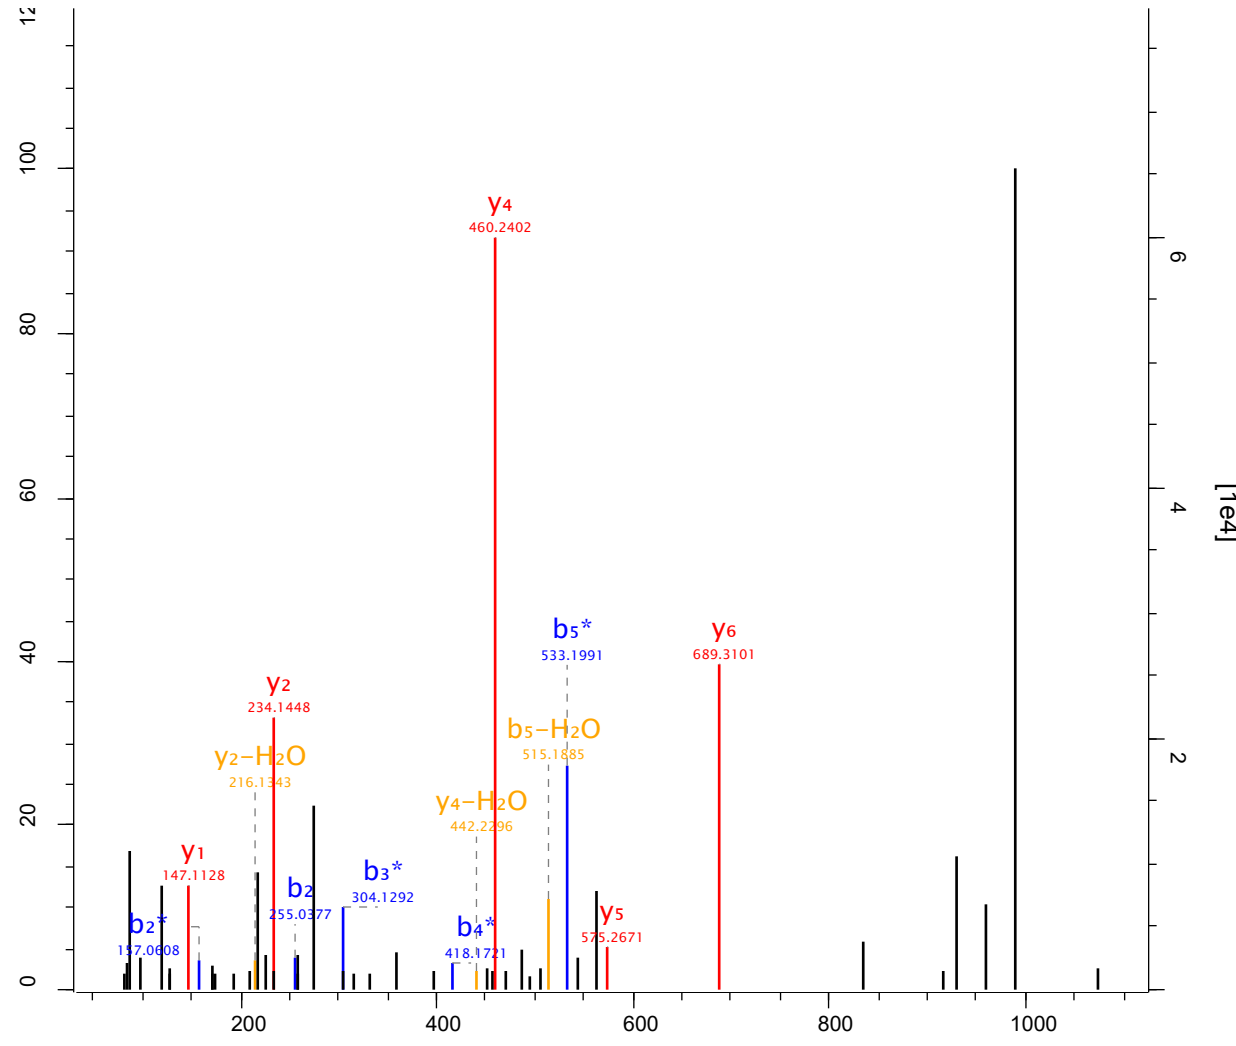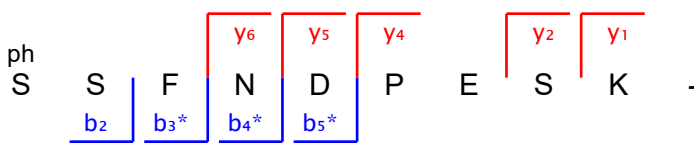

Raw file Scan Method Score m/z  
 sys\_15\_1 6138 FTMS; HCD 92.25 576.21

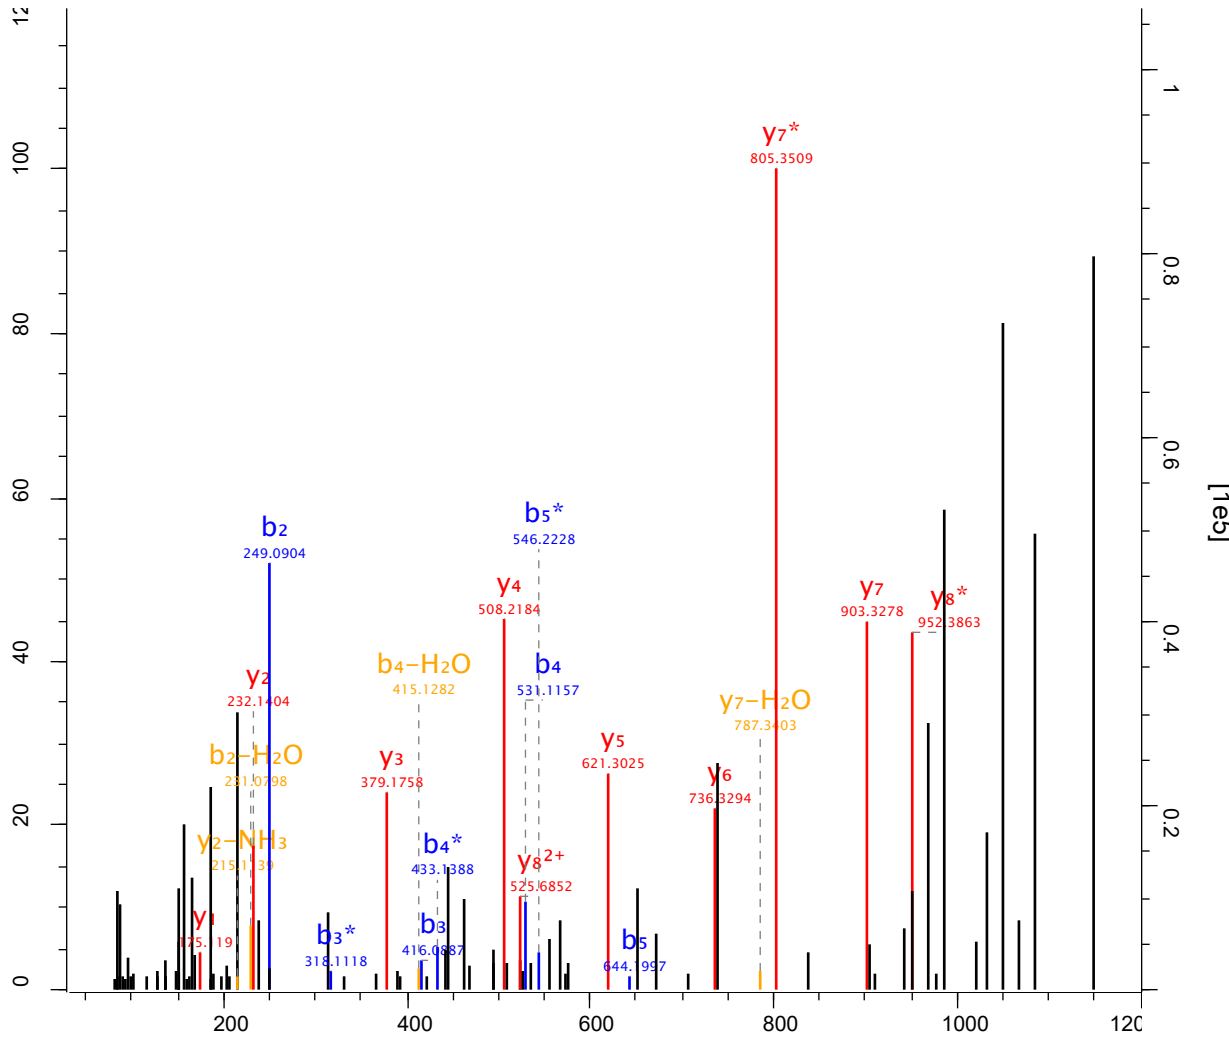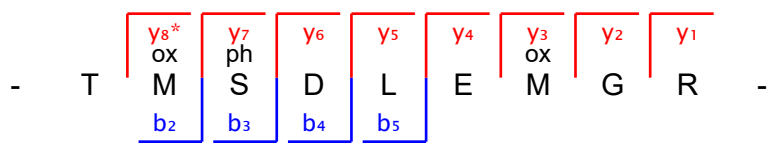

Raw file Scan Method Score m/z  
 sys\_15\_1 6191 FTMS; HCD 71.35 584.21

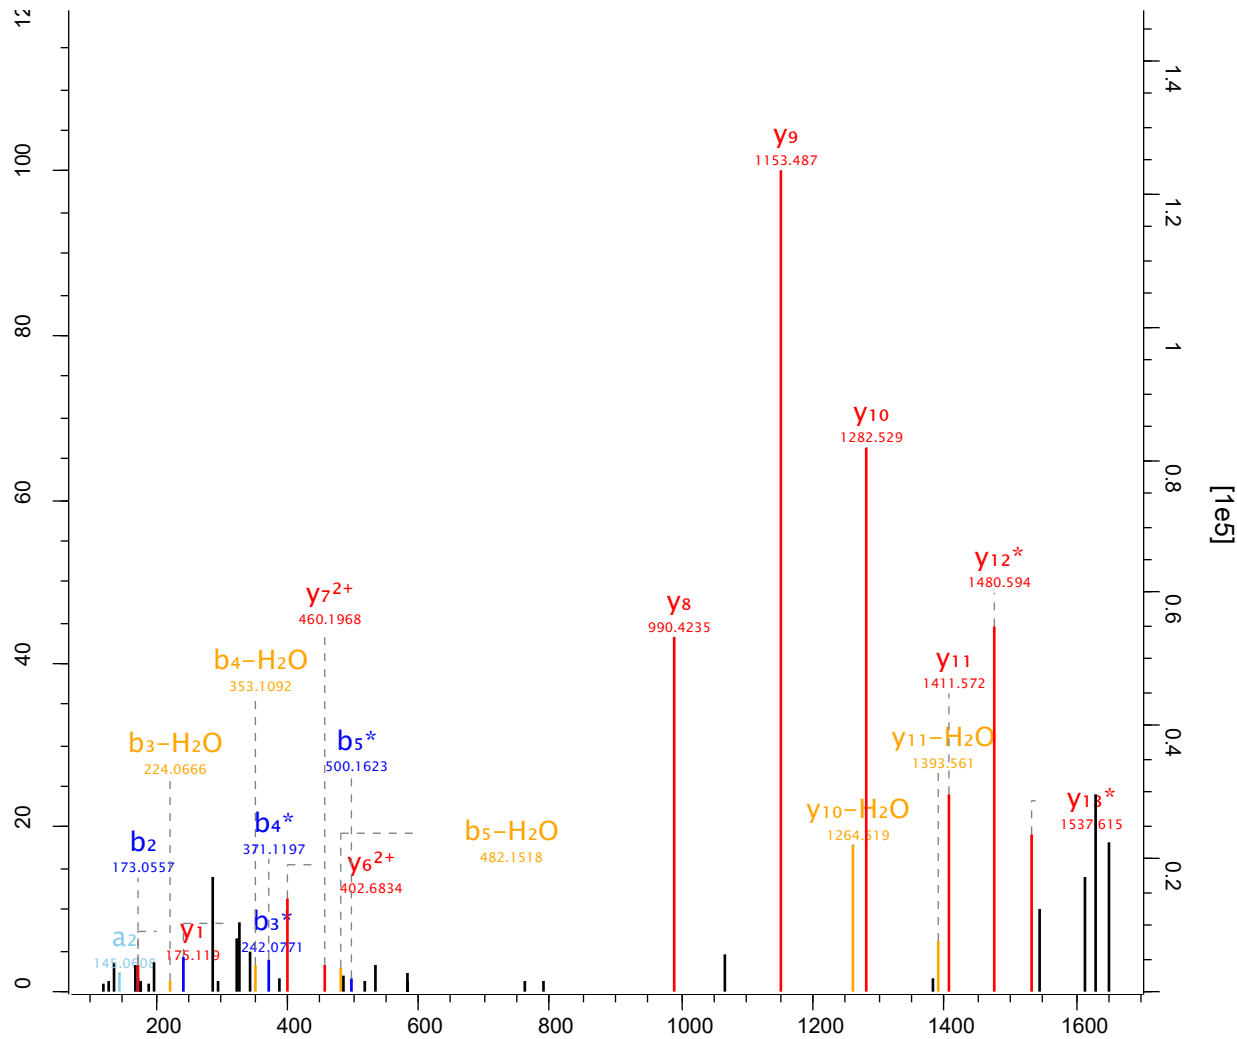

- D G S E E Y A D D N R E R -

b<sub>2</sub>
b<sub>3</sub><sup>\*</sup>
b<sub>4</sub><sup>\*</sup>
b<sub>5</sub><sup>\*</sup>
y<sub>13</sub><sup>\*</sup>
y<sub>12</sub><sup>\*</sup>
y<sub>11</sub>
y<sub>10</sub>
y<sub>9</sub>
y<sub>8</sub>
y<sub>7</sub><sup>2+</sup>
y<sub>6</sub><sup>2+</sup>
y<sub>1</sub>

Raw file Scan Method Score m/z  
 sys\_15\_1 6215 FTMS; HCD 110.12 644.79

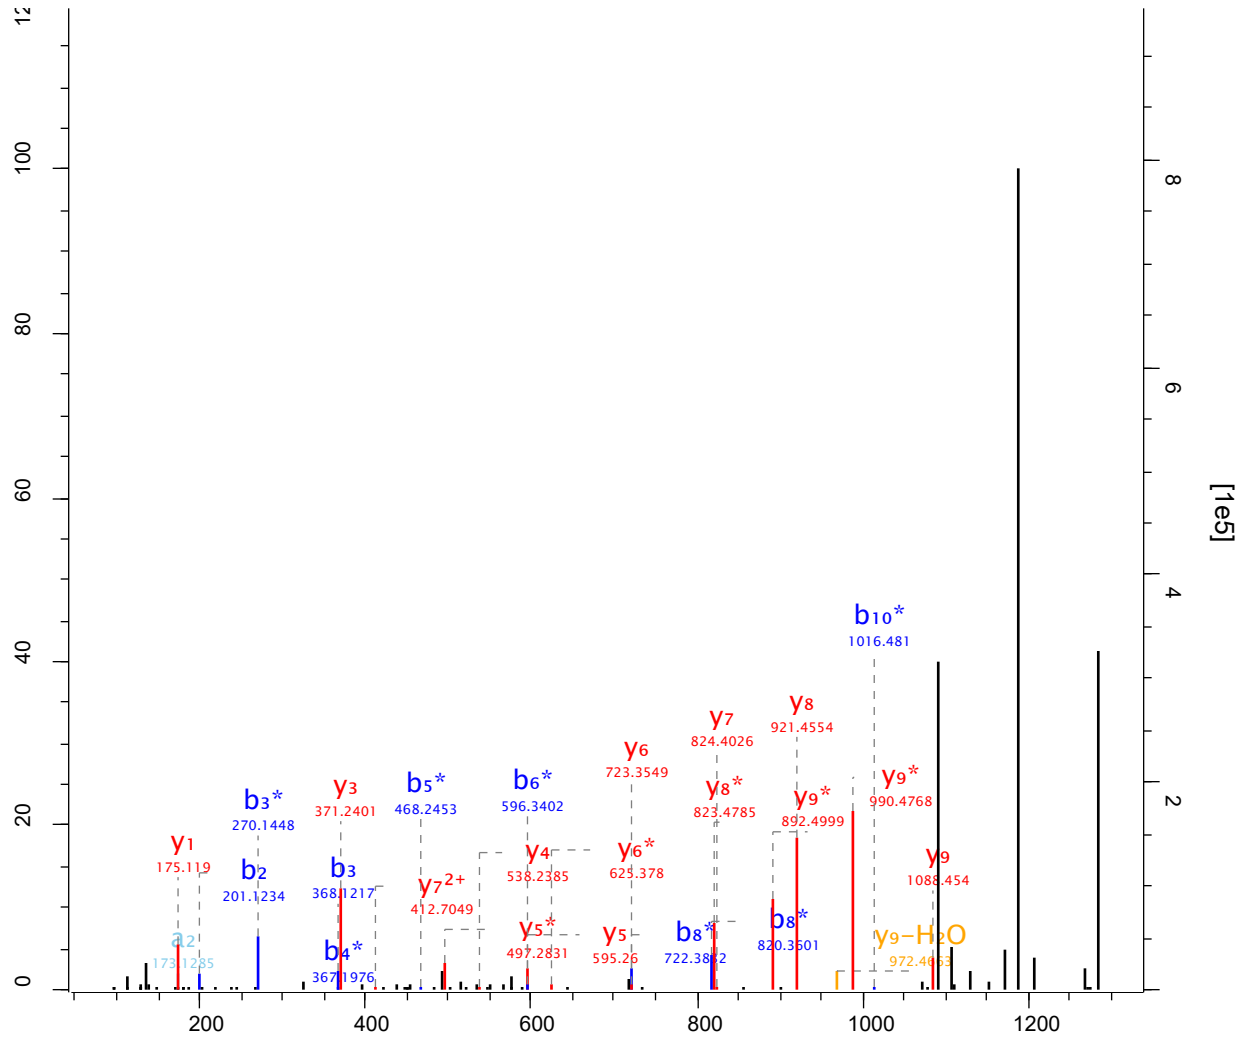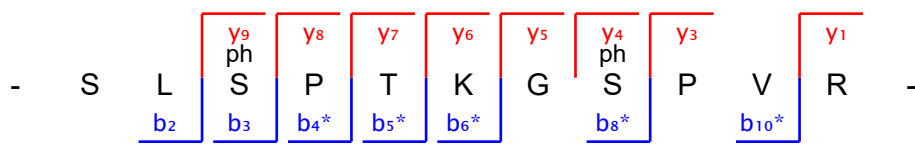

Raw file Scan Method Score m/z  
 sys\_15\_1 6484 FTMS; HCD 217.67 644.29

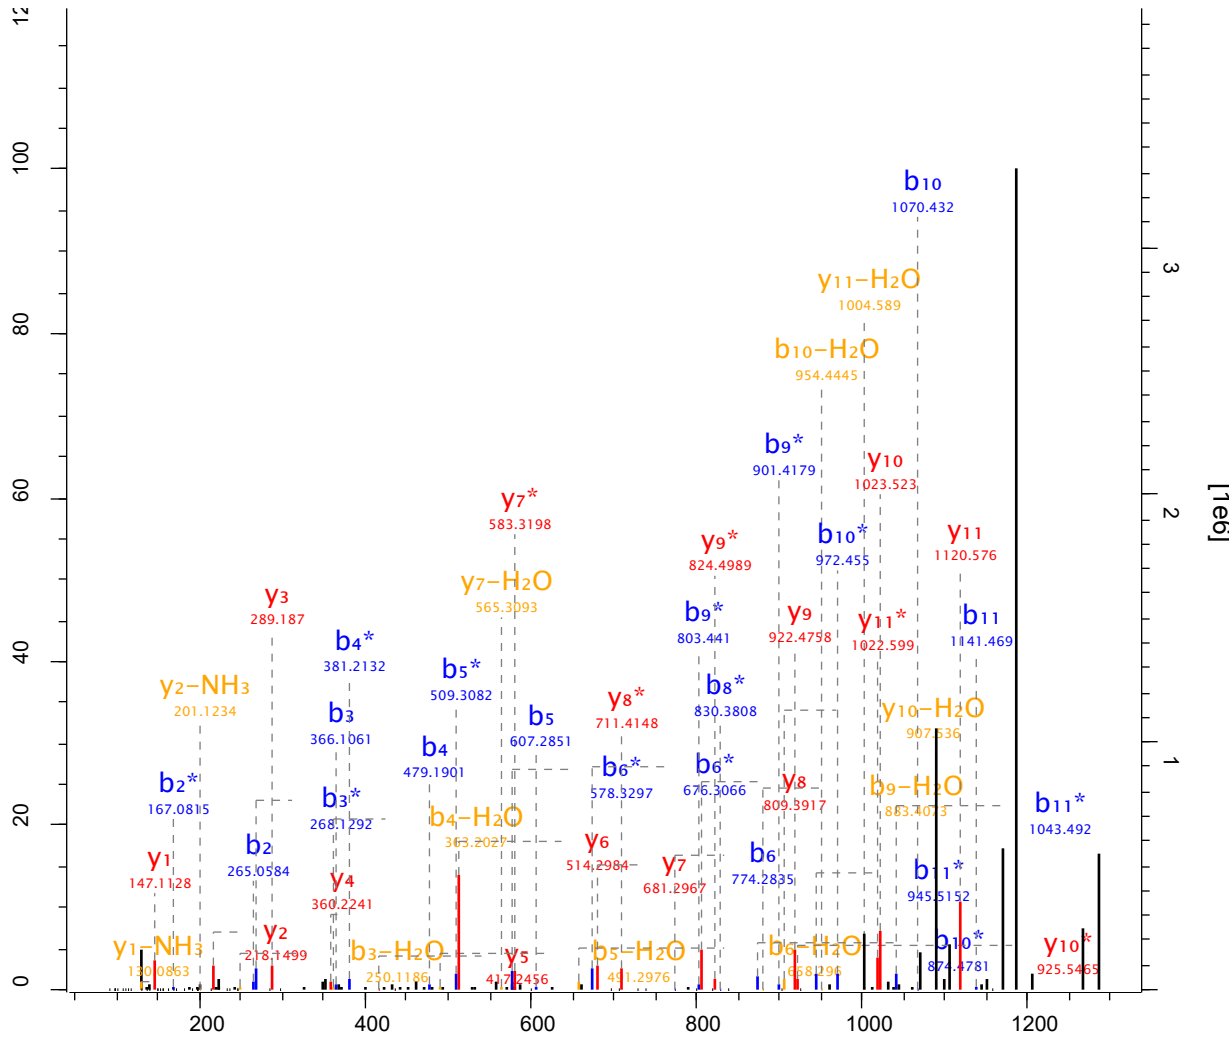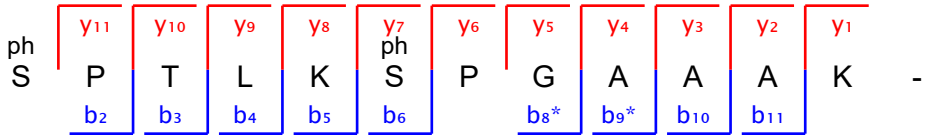

Raw file Scan Method Score m/z  
 sys\_15\_1 6488 FTMS; HCD 121.03 695.75

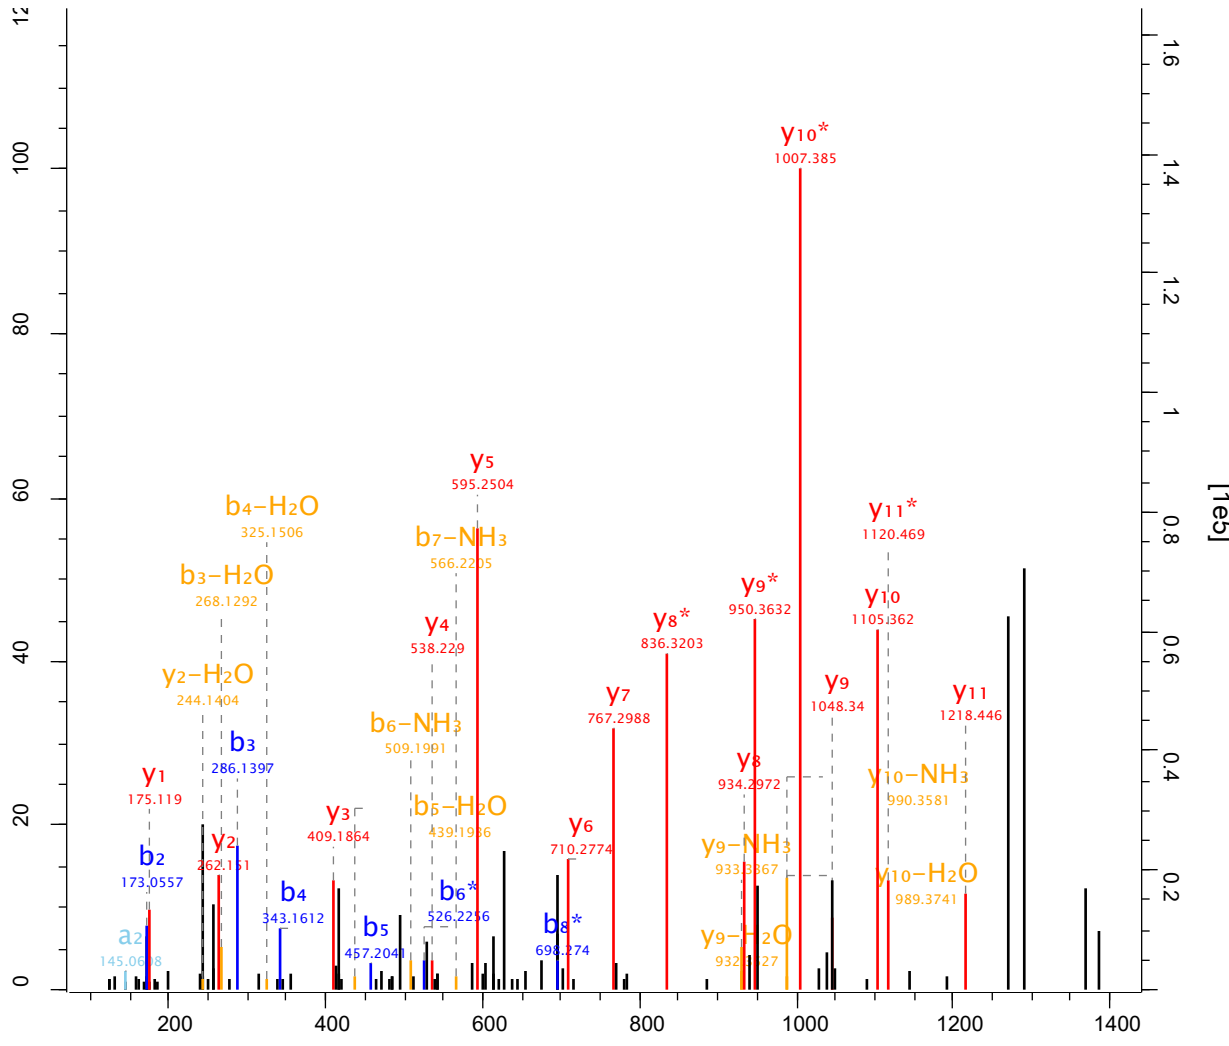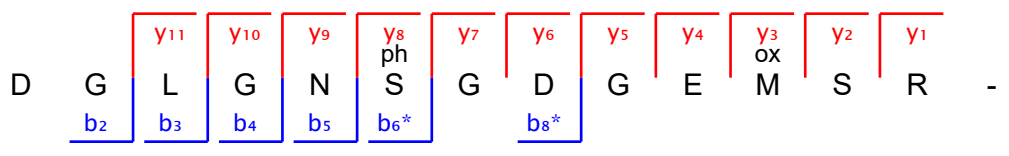

| Raw file | Scan | Method    | Score  | m/z    |
|----------|------|-----------|--------|--------|
| sys_15_1 | 6498 | FTMS; HCD | 191.93 | 777.32 |

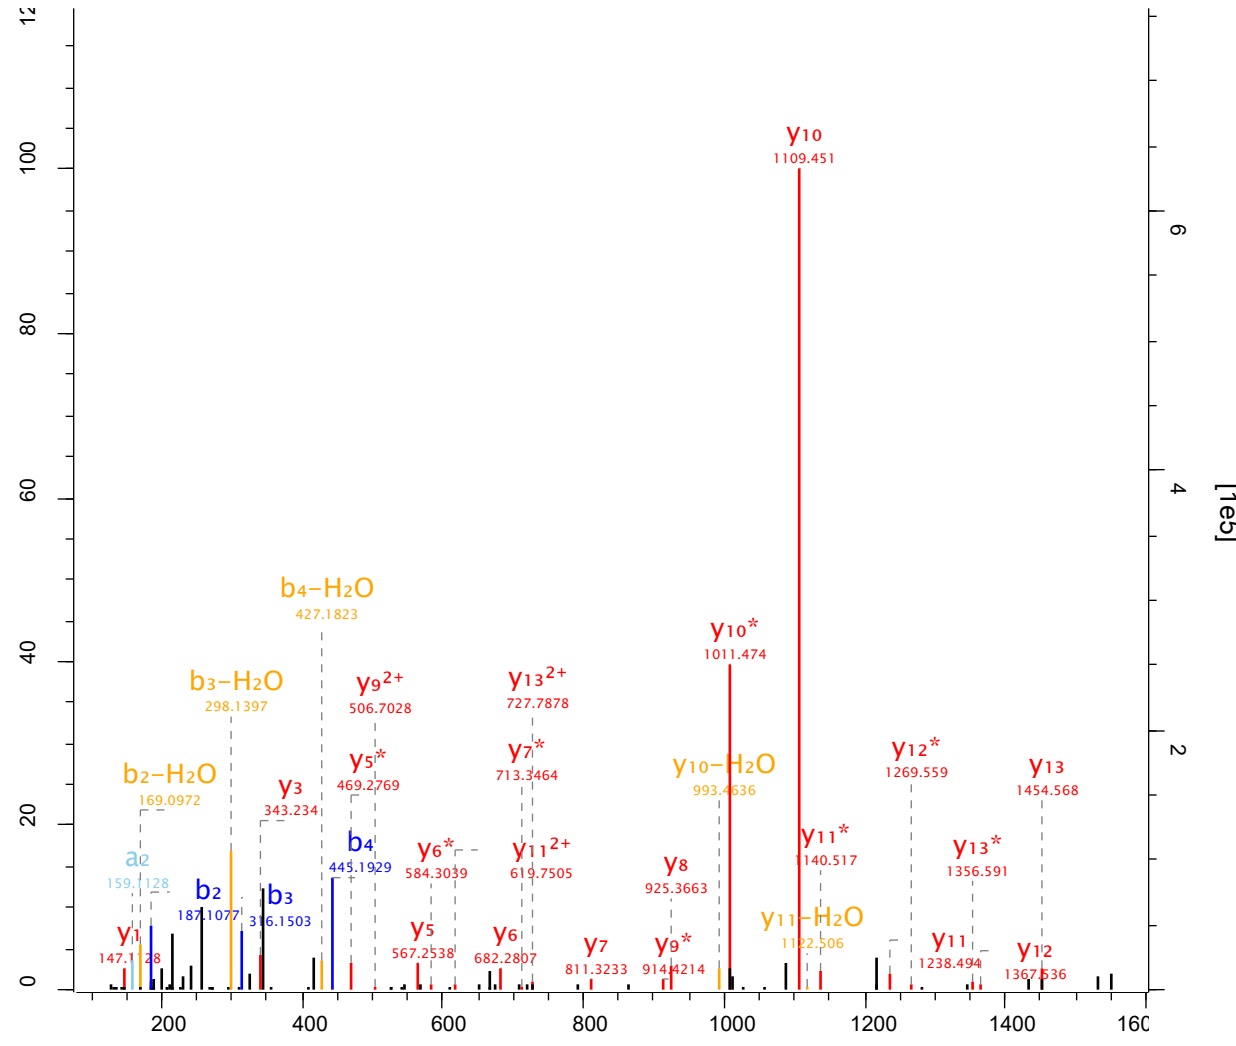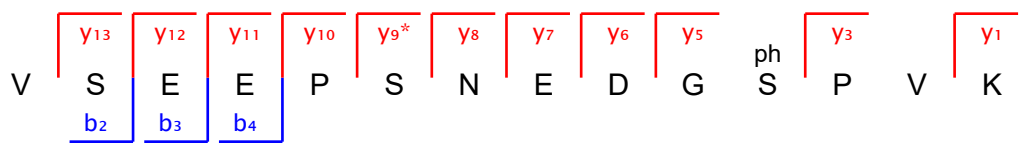



Raw file Scan Method Score m/z  
 sys\_15\_1 6565 FTMS; HCD 65.54 445.2

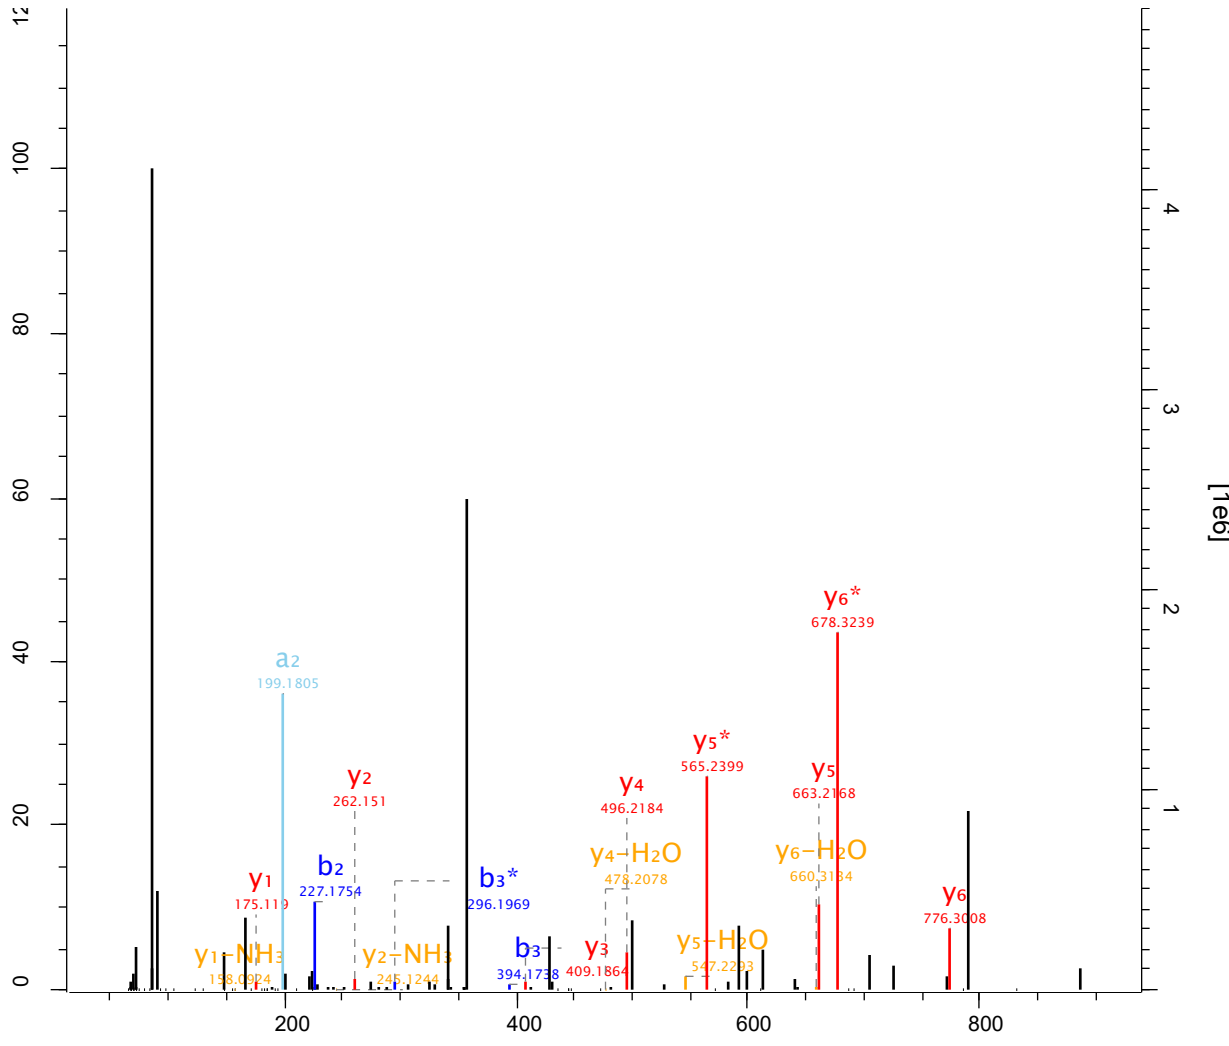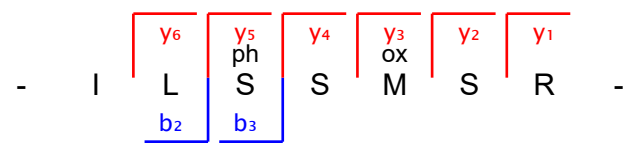

Raw file Scan Method Score m/z  
 sys\_15\_1 6585 FTMS; HCD 57.16 600.74

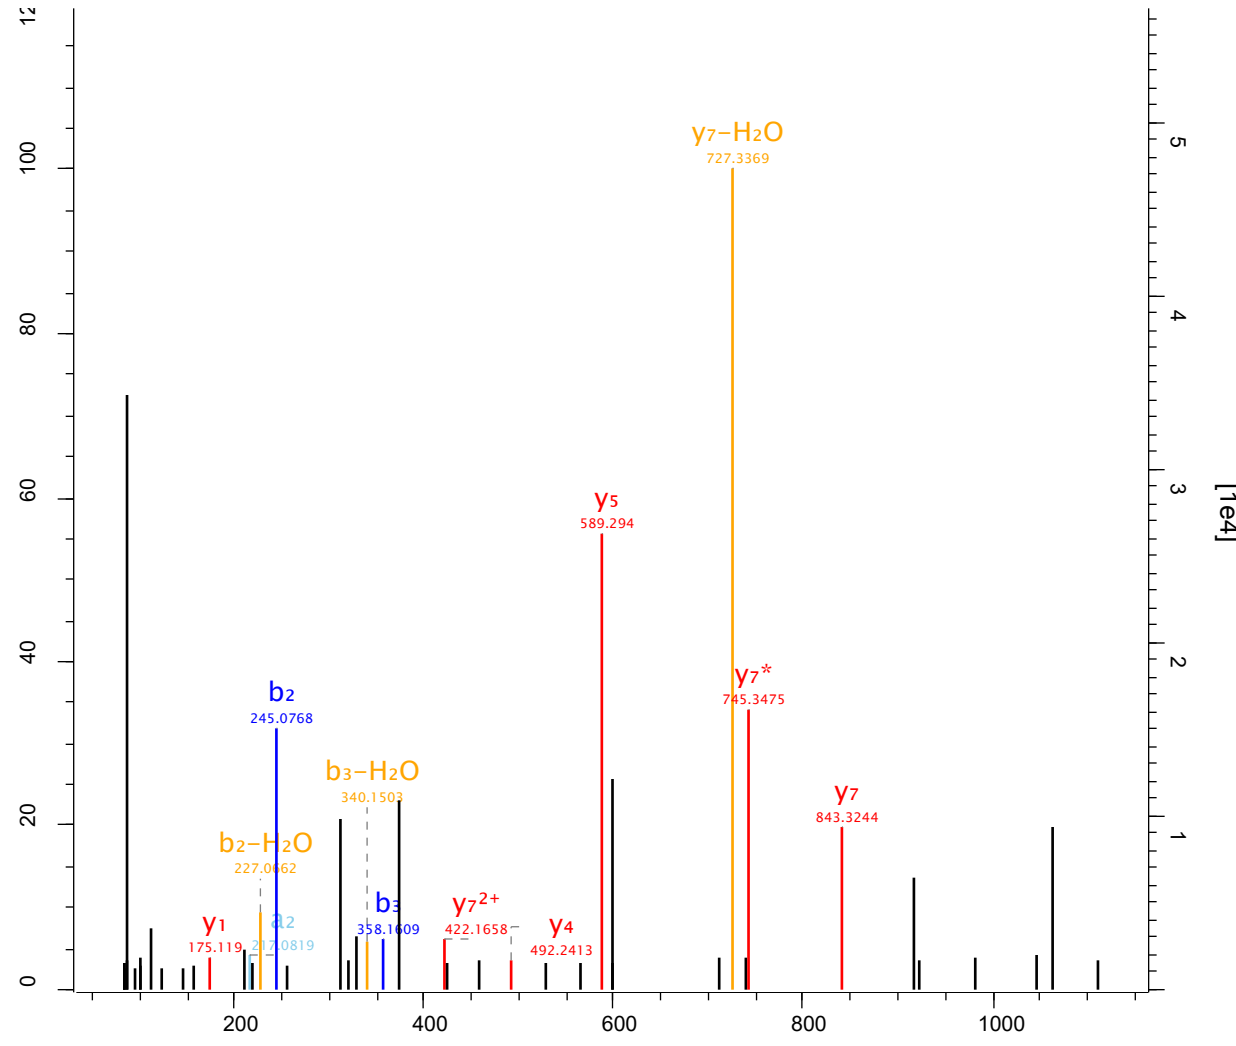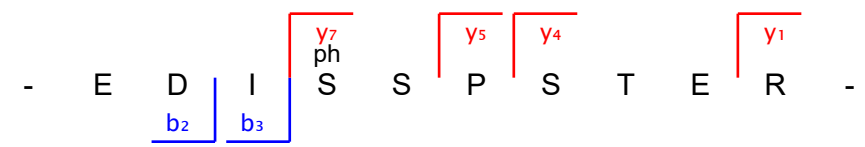

Raw file Scan Method Score m/z  
 sys\_15\_1 6603 FTMS; HCD 49.3 610.26

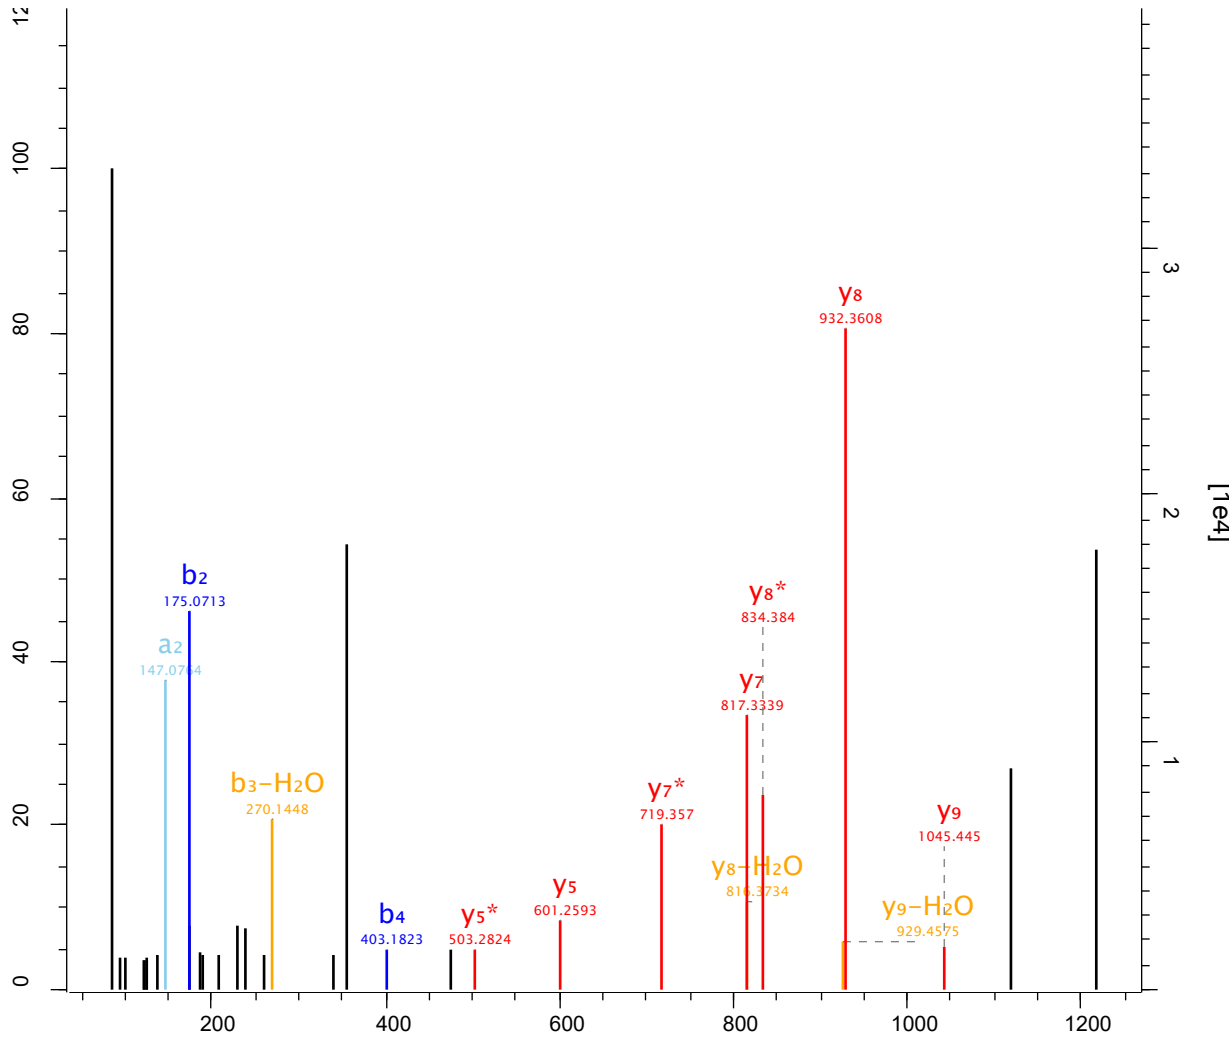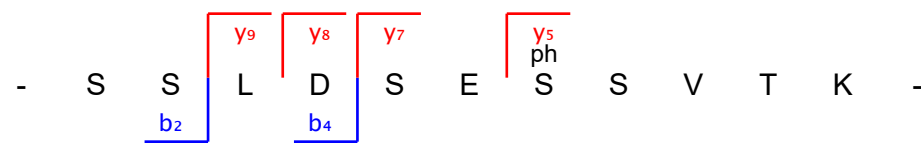

Raw file Scan Method Score m/z  
 sys\_15\_1 6715 FTMS; HCD 169.54 571.23

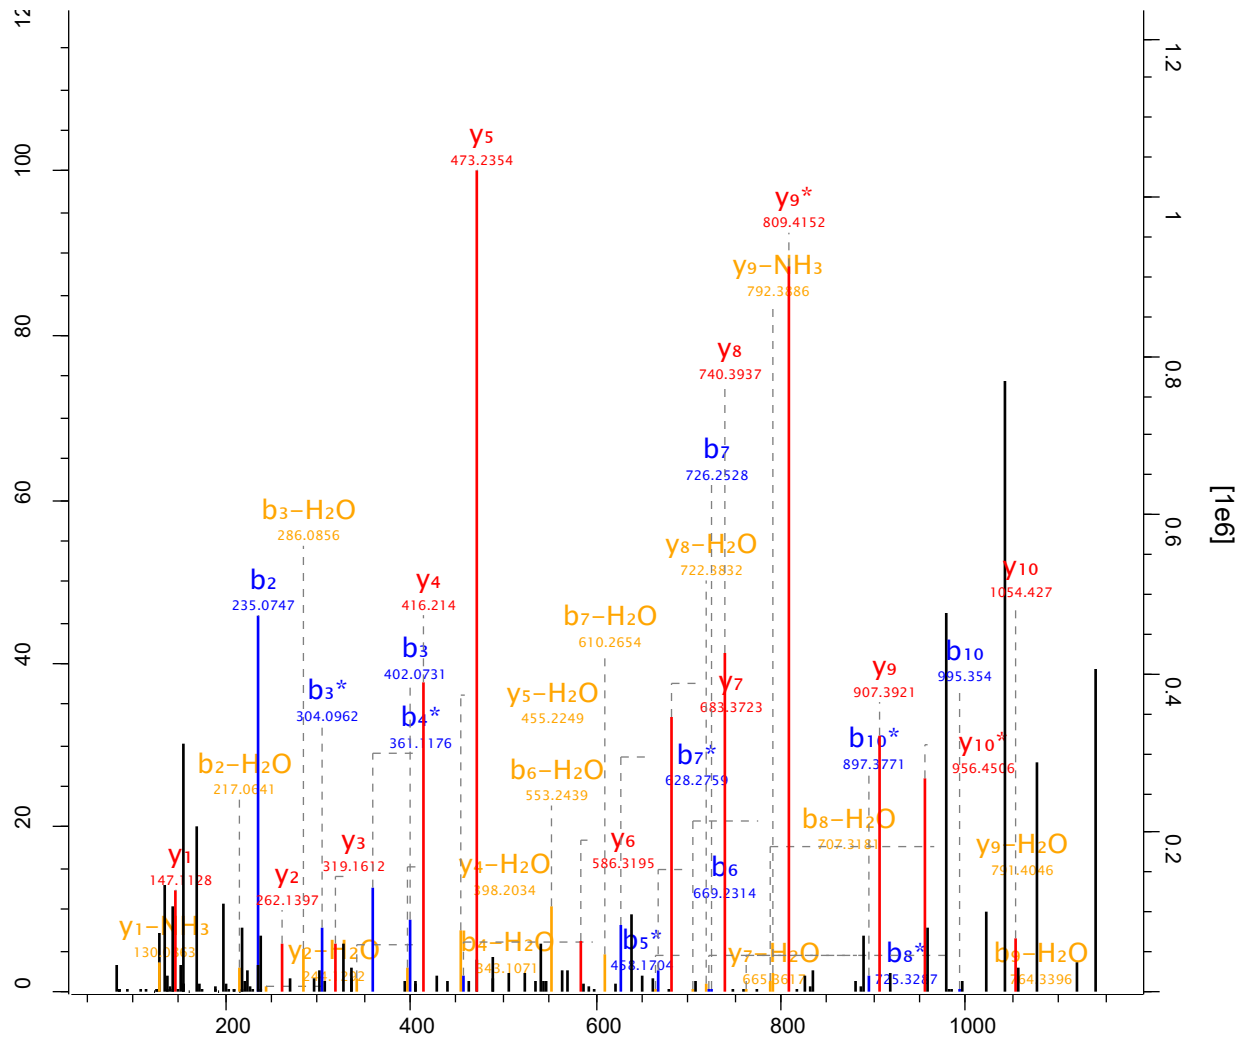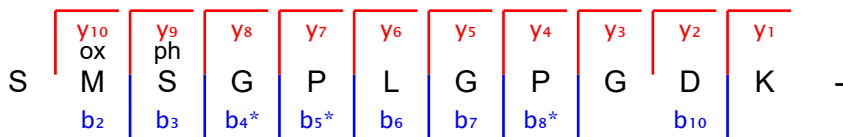

Raw file Scan Method Score m/z  
 sys\_15\_1 6718 FTMS; HCD 182.02 675.76

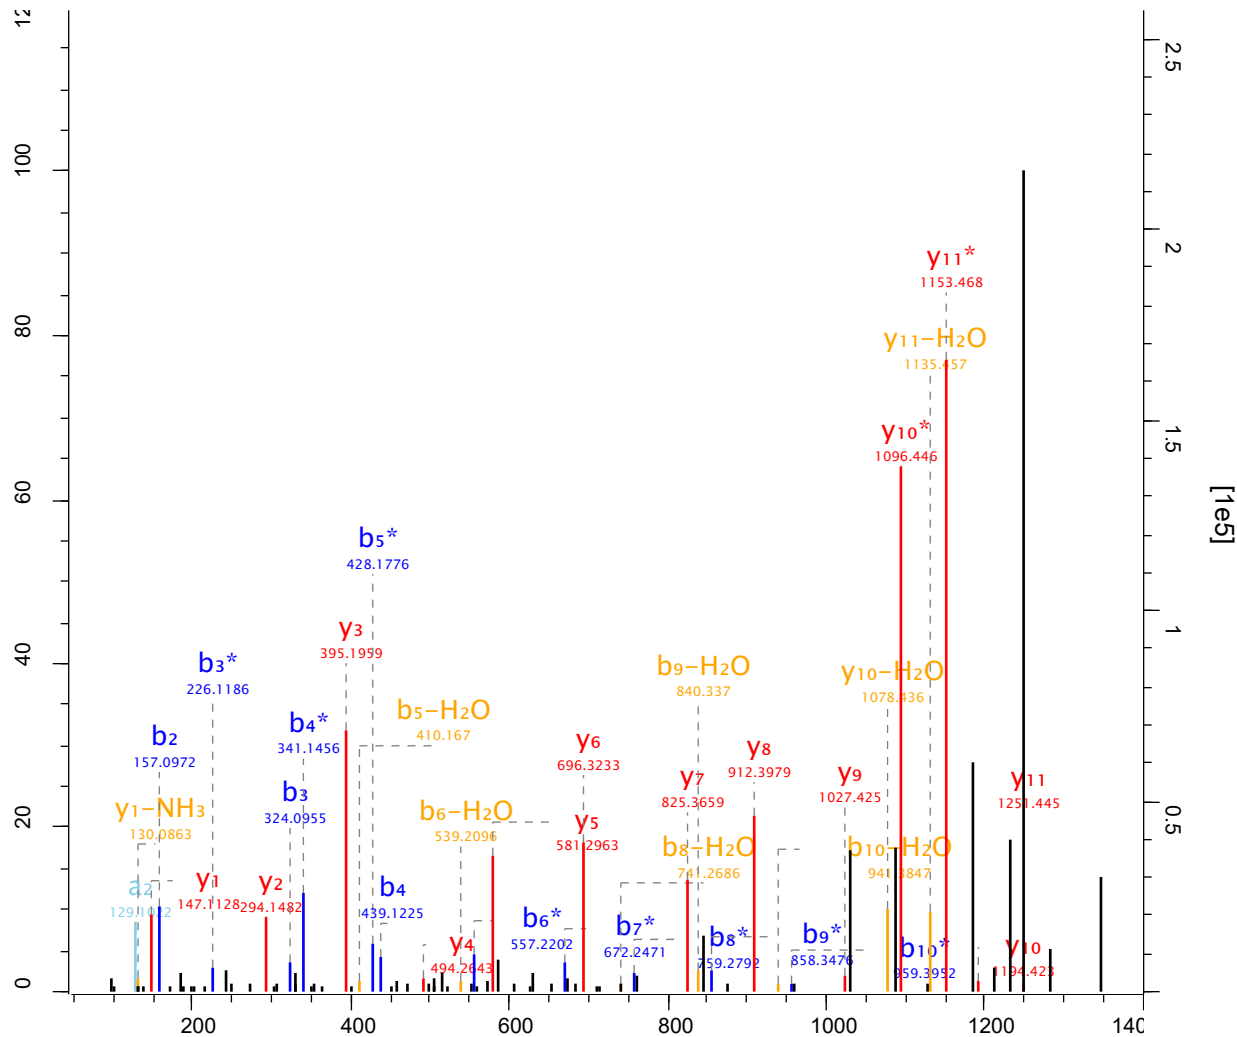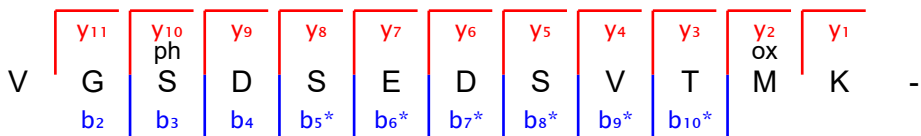

Raw file Scan Method Score m/z  
 sys\_15\_1 6732 FTMS; HCD 210.98 762.35

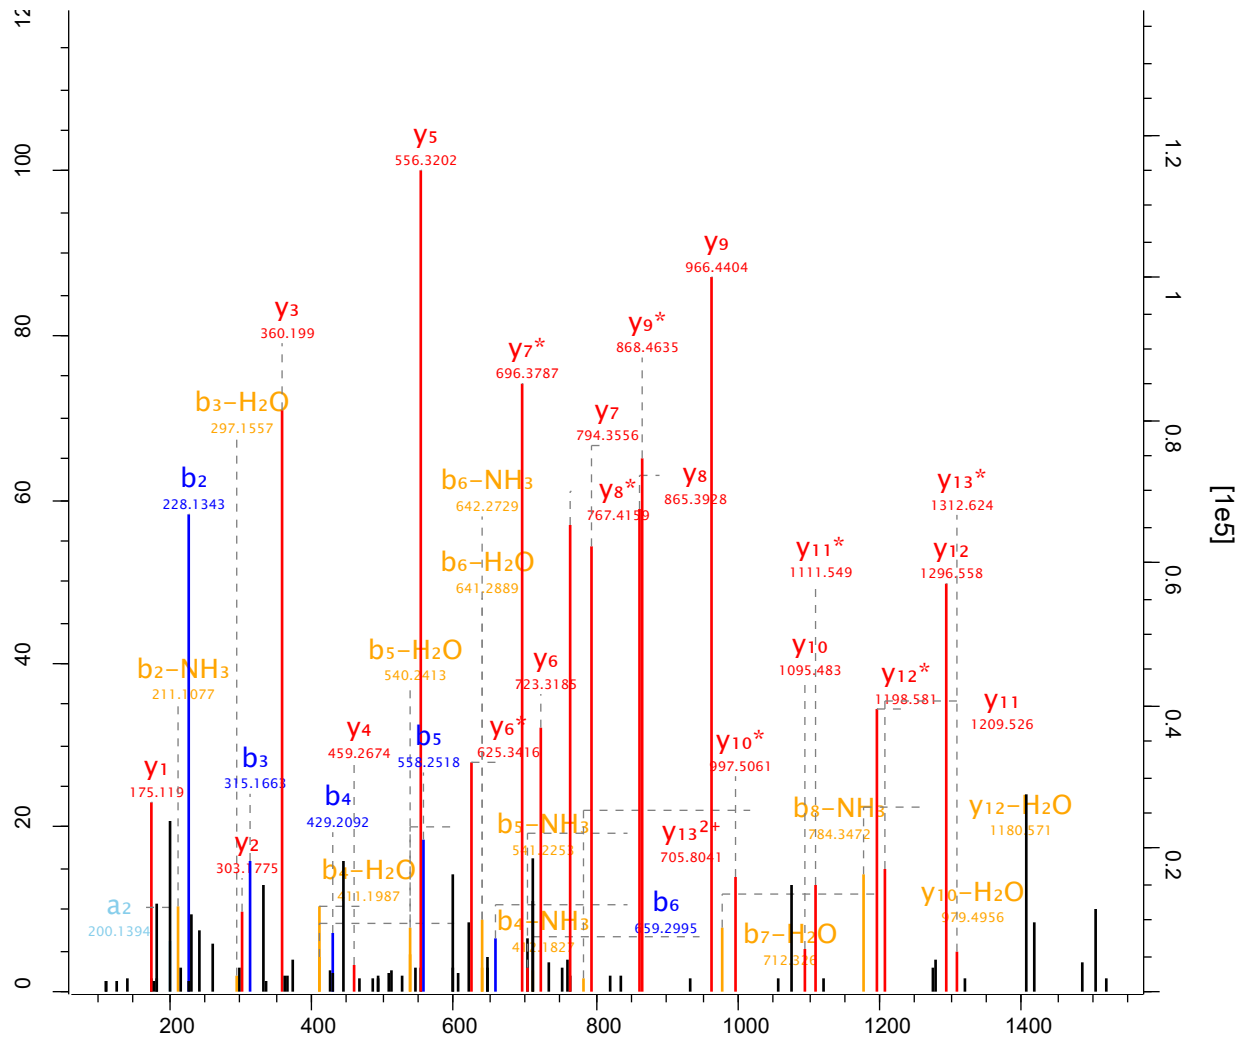

I y13\* y12 y11 y10 y9 y8 y7 y6 y5 y4 y3 y2 y1 -  
 N S N E T A A S P V G Q R -  
b2 b3 b4 b5 b6

Raw file Scan Method Score m/z  
 sys\_15\_1 6849 FTMS; HCD 69.03 638.72

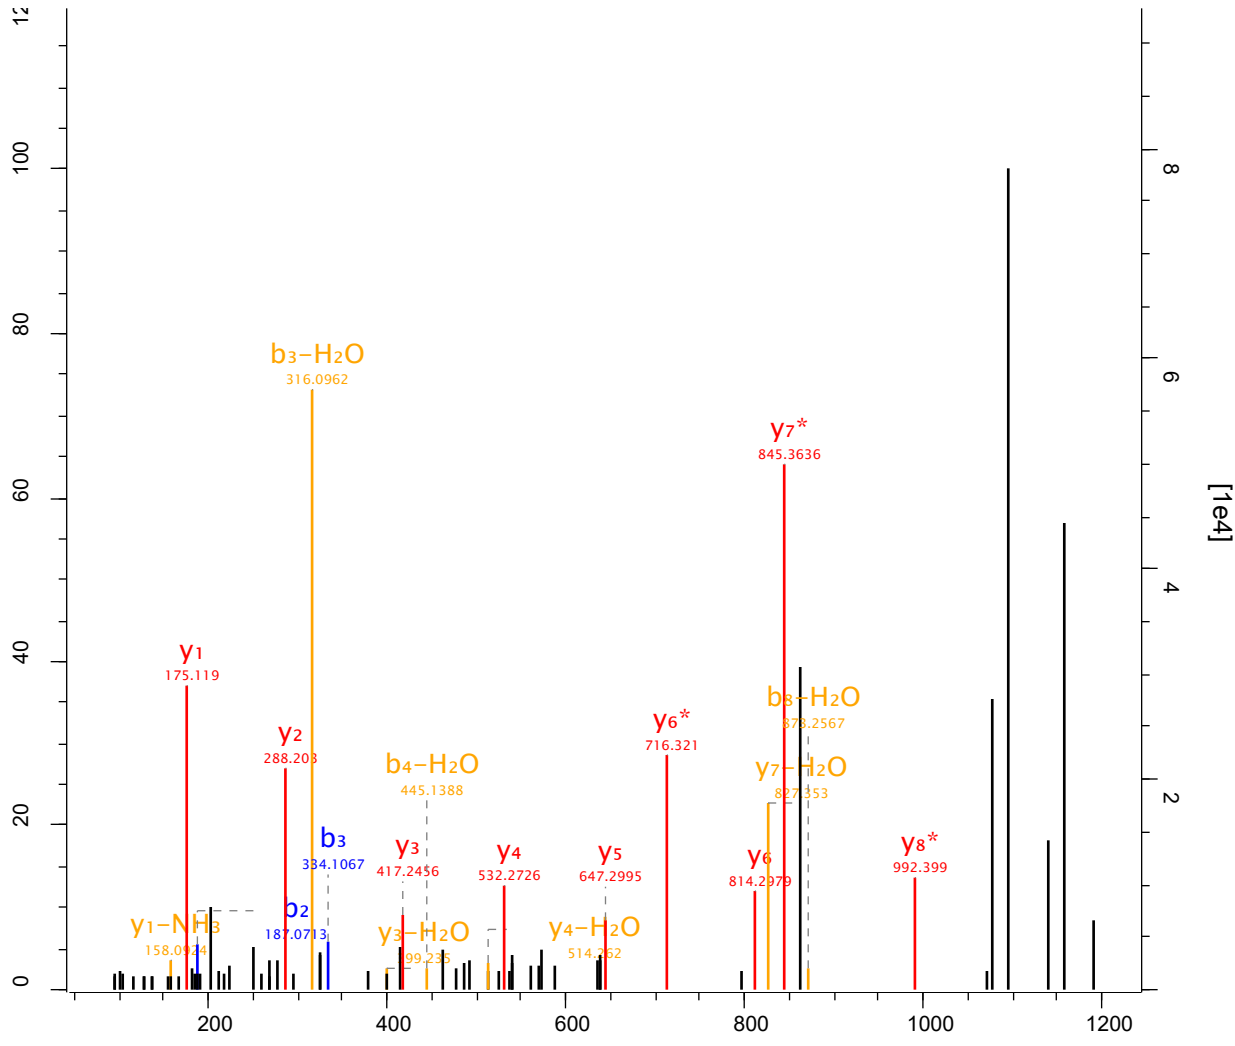

- E G M E S D D E I R -  
 b2 b3 y8\* ox y7\* y6 ph y5 y4 y3 y2 y1

Raw file Scan Method Score m/z  
 sys\_15\_1 6870 FTMS; HCD 41.62 623.25

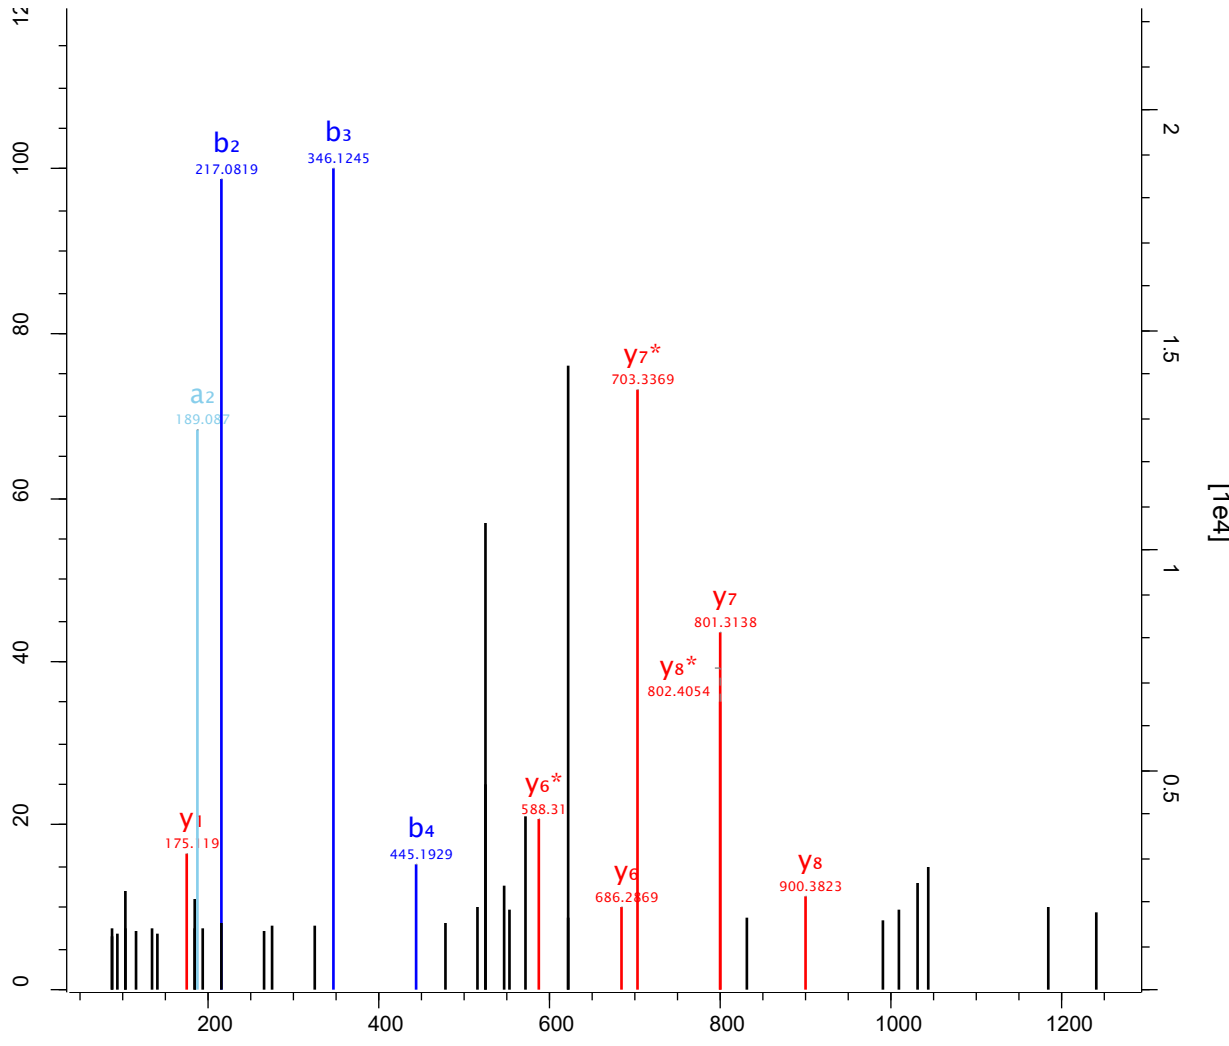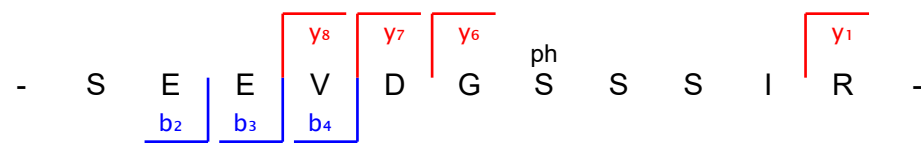



Raw file Scan Method Score m/z  
 sys\_15\_1 7019 FTMS; HCD 73.63 525.2

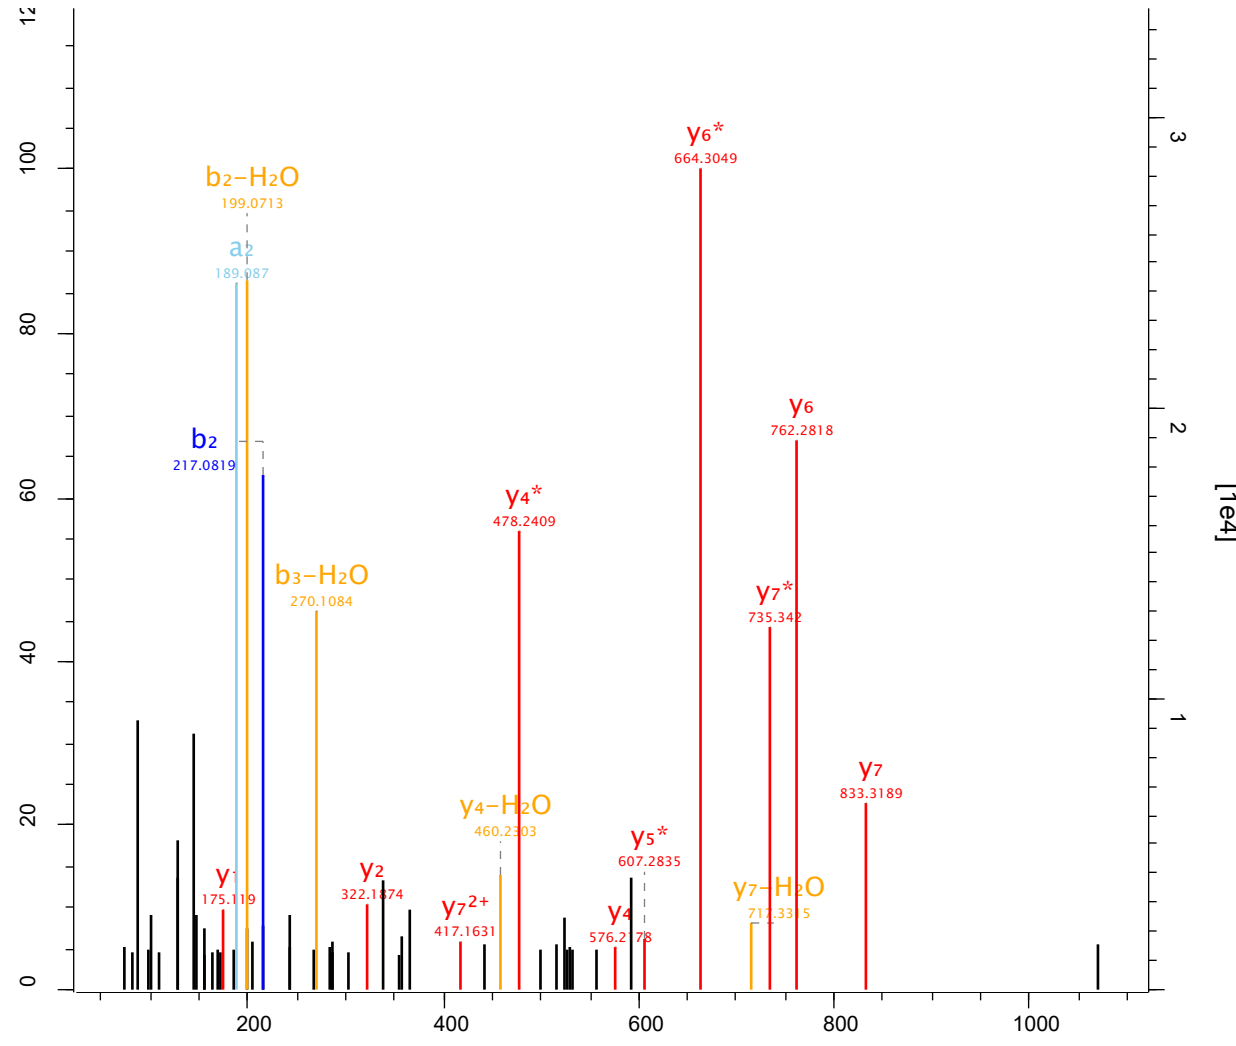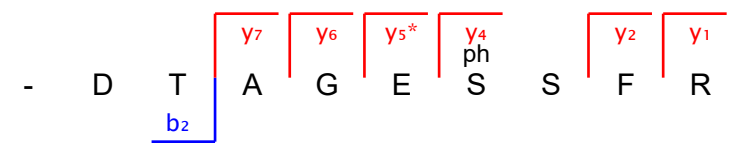

Raw file Scan Method Score m/z  
 sys\_15\_1 7060 FTMS; HCD 41.62 793.86

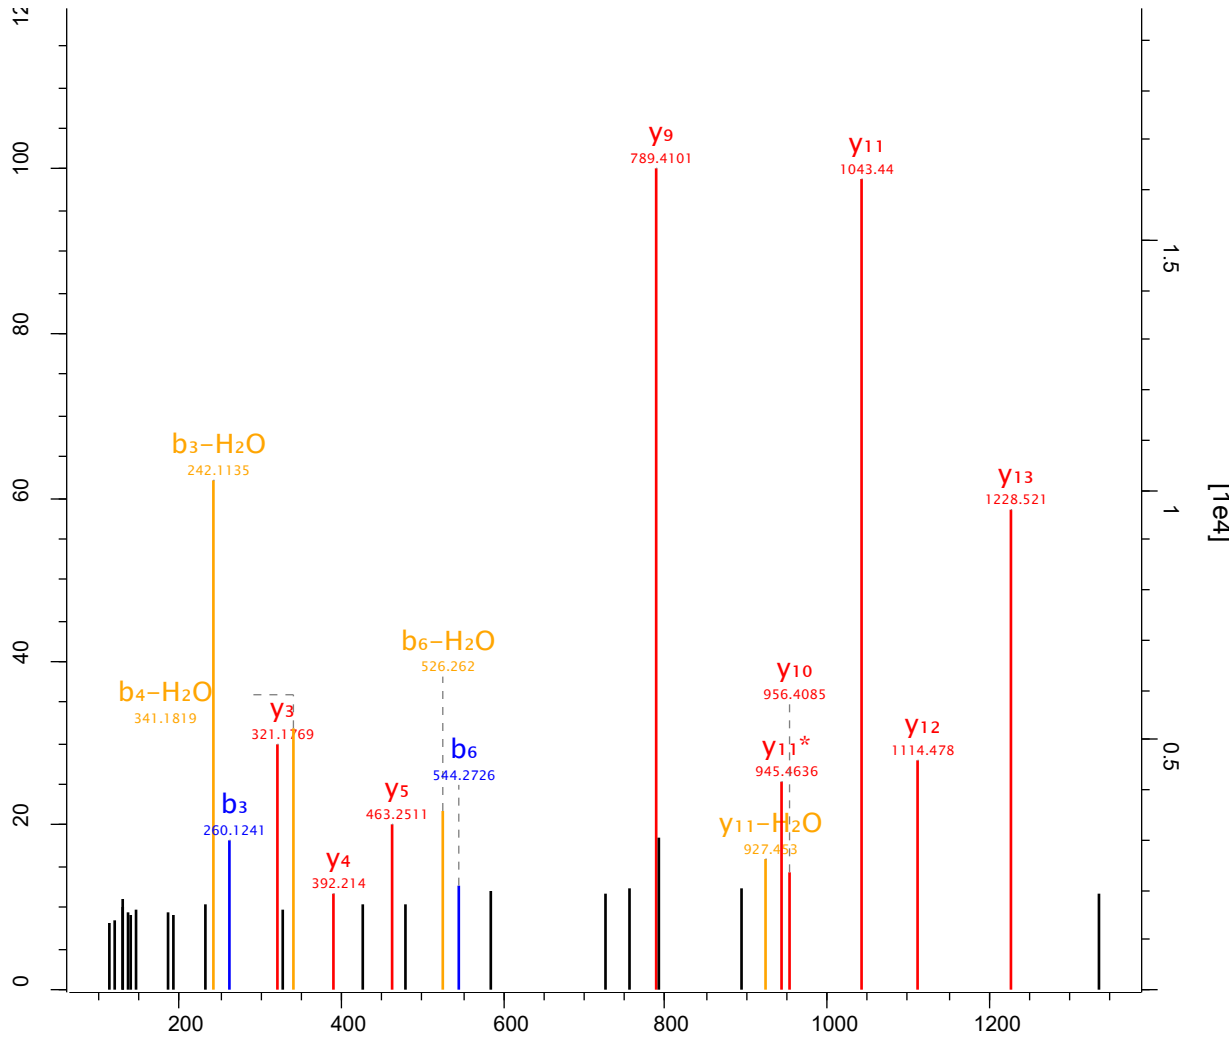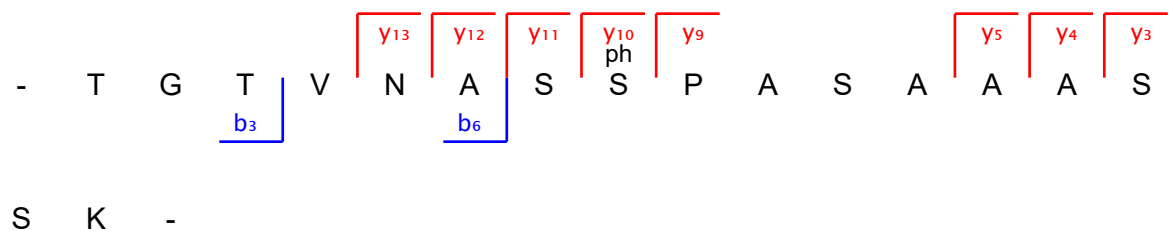

Raw file Scan Method Score m/z  
 sys\_15\_1 7062 FTMS; HCD 43.76 688.27

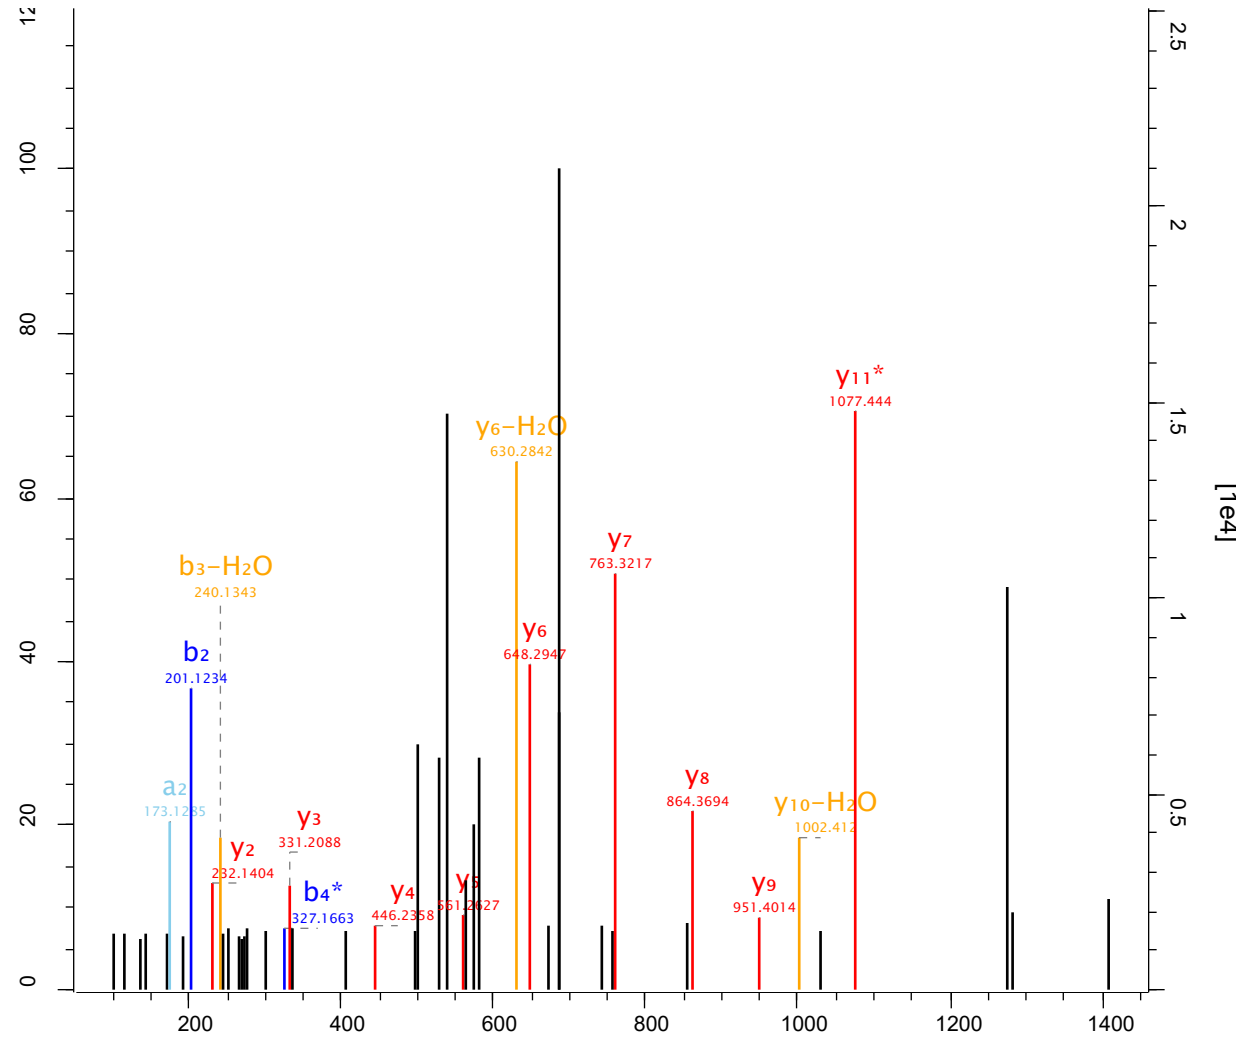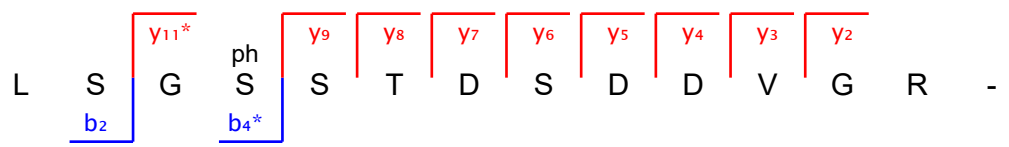

Raw file Scan Method Score m/z  
 sys\_15\_1 7068 FTMS; HCD 162.31 709.25

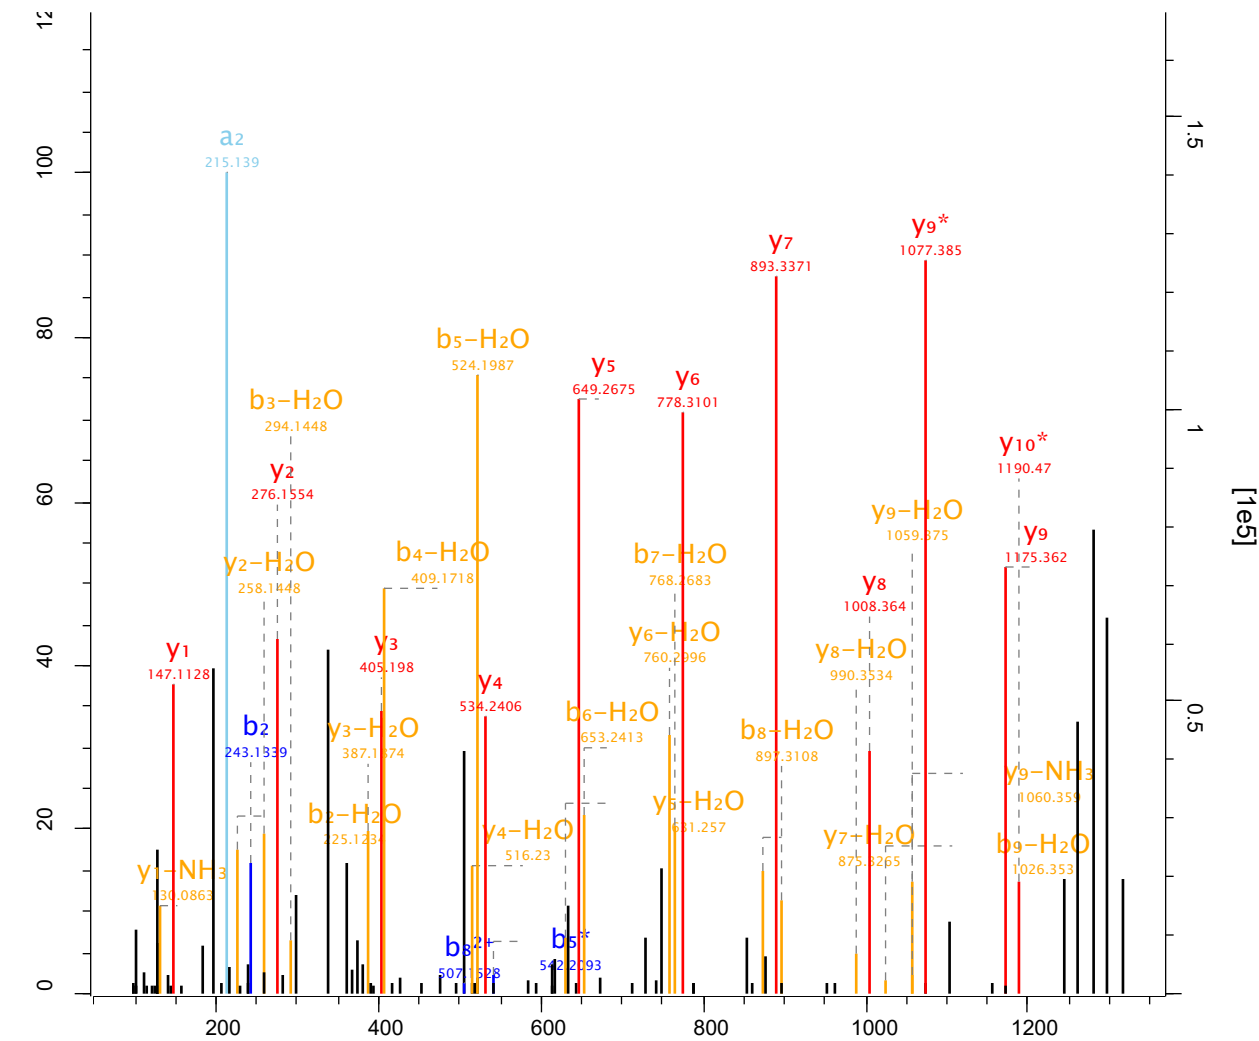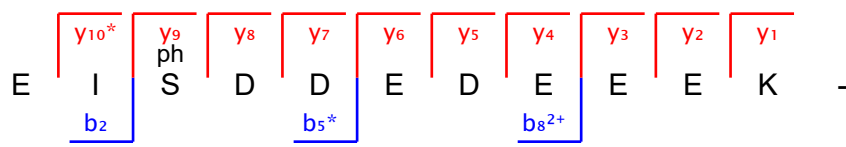

| Raw file | Scan | Method    | Score | m/z    |
|----------|------|-----------|-------|--------|
| sys_15_1 | 7132 | FTMS; HCD | 87.18 | 499.22 |

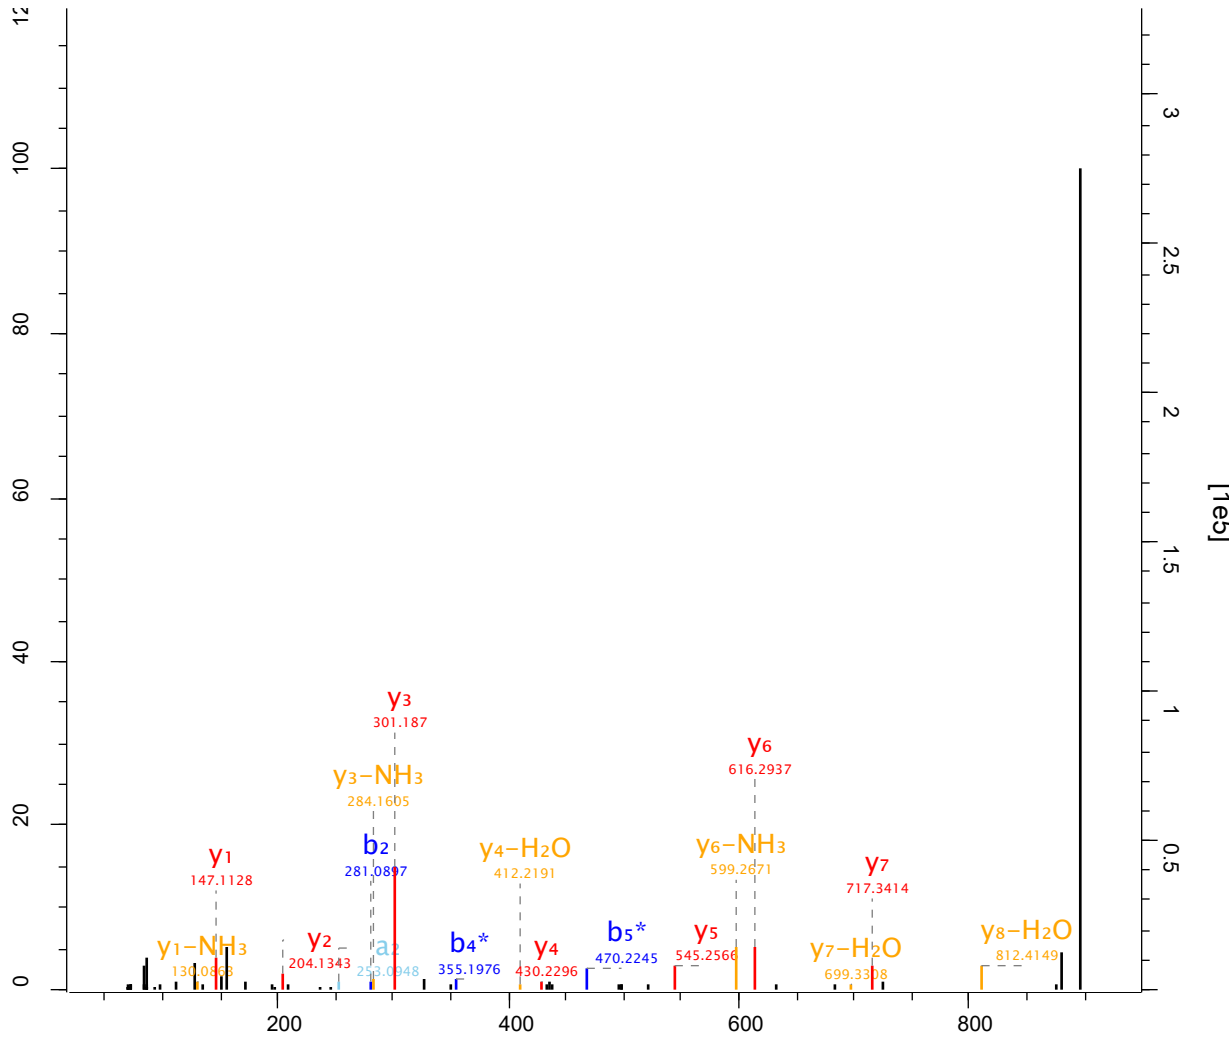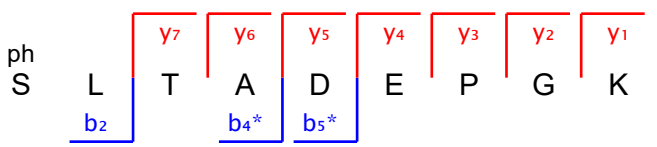

Raw file Scan Method Score m/z  
 sys\_15\_1 7194 FTMS; HCD 72.29 550.25

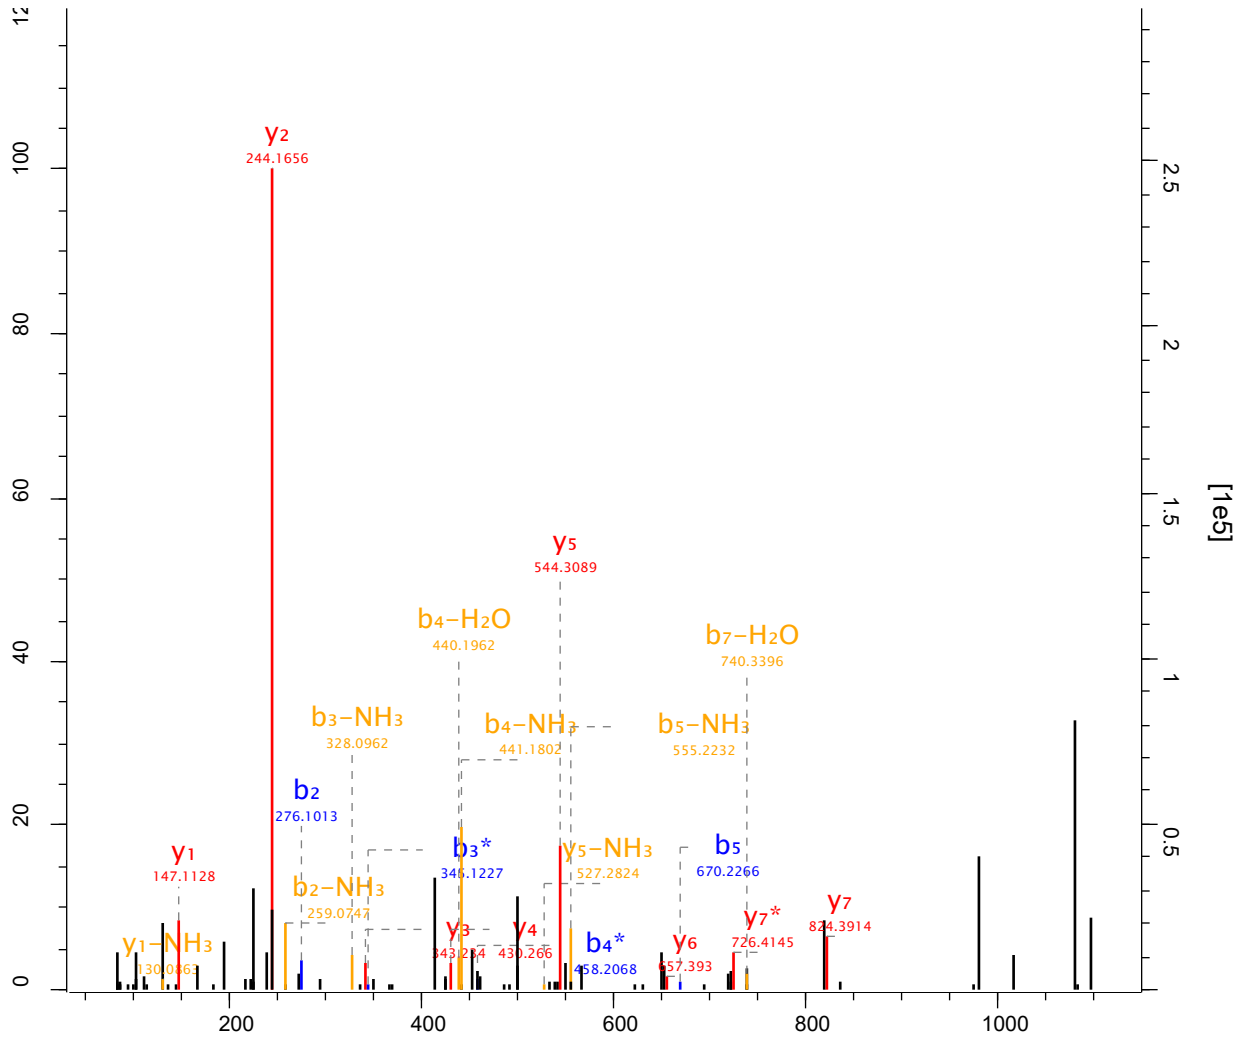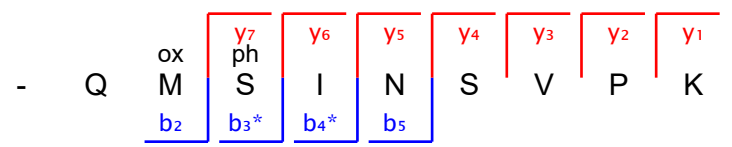

Raw file Scan Method Score m/z  
 sys\_15\_1 7232 FTMS; HCD 72.89 591.71

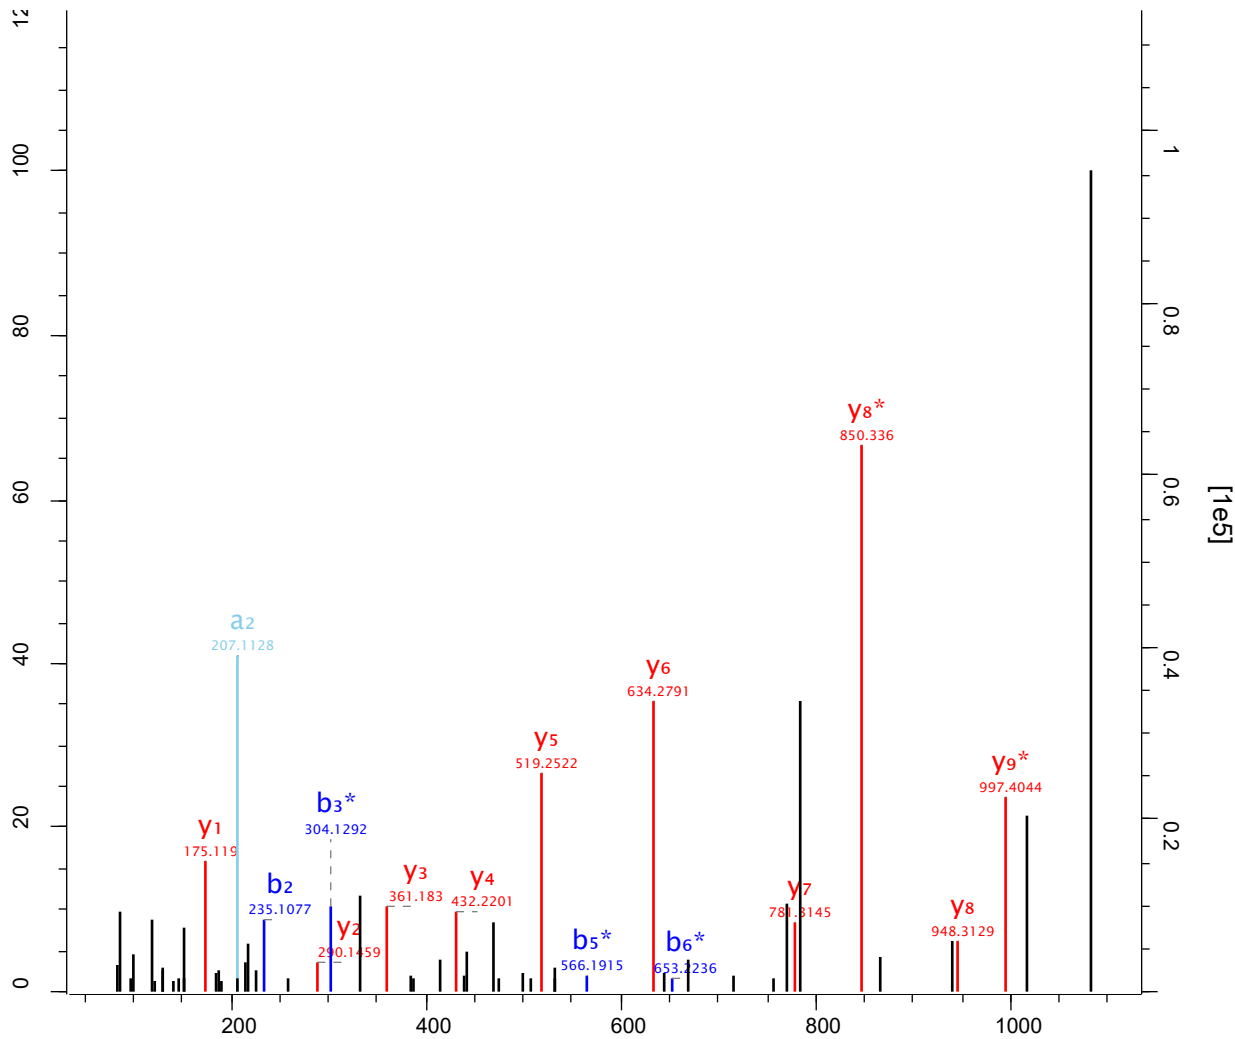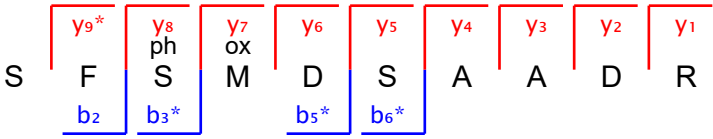

Raw file Scan Method Score m/z  
 sys\_15\_1 7368 FTMS; HCD 85.91 643.74

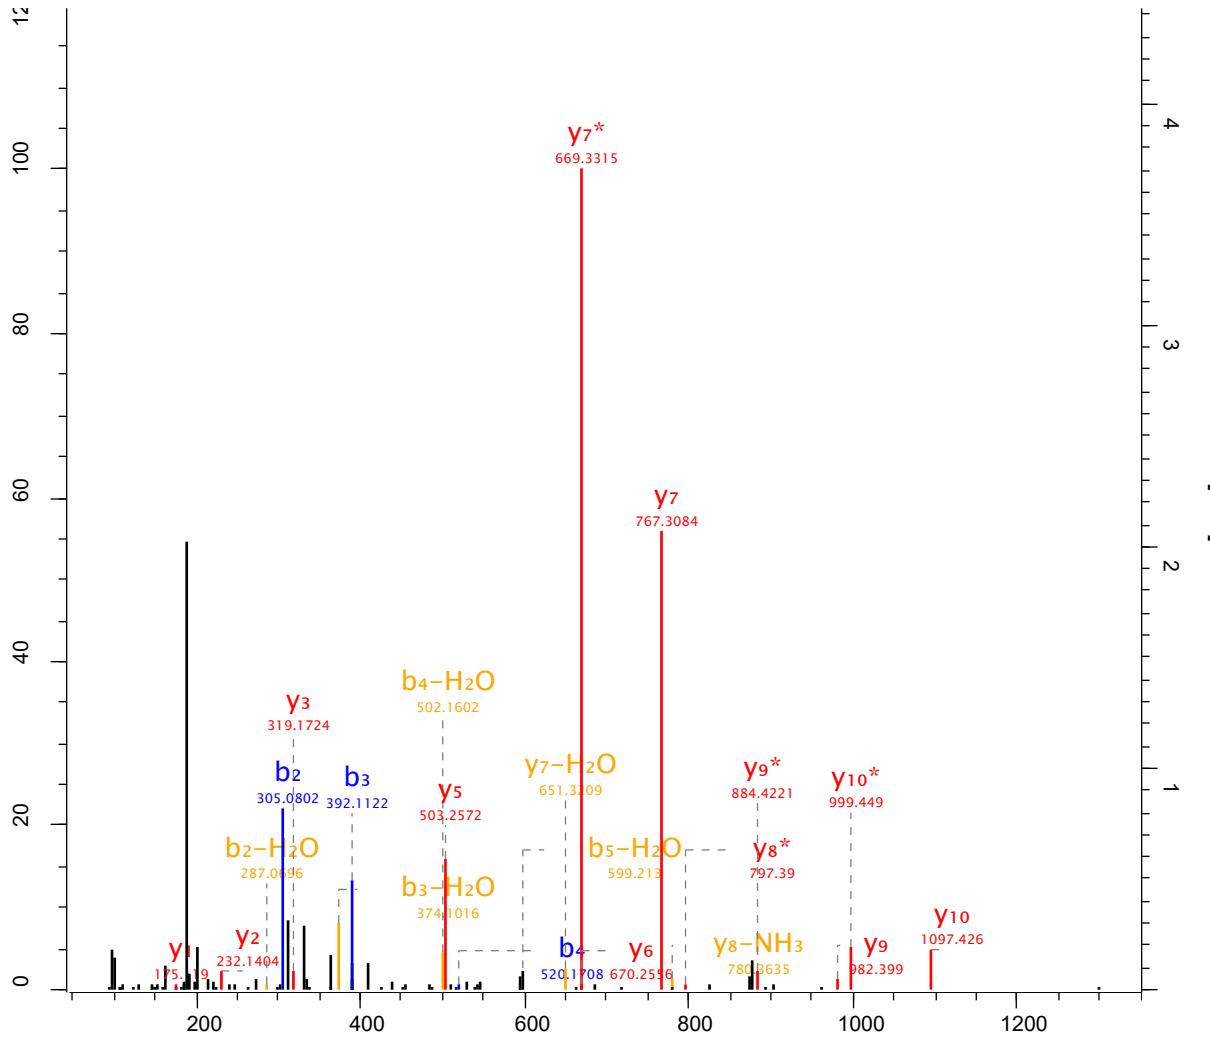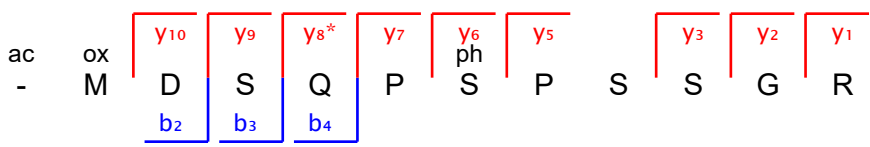



Raw file Scan Method Score m/z  
 sys\_15\_1 7398 FTMS; HCD 101.75 690.28

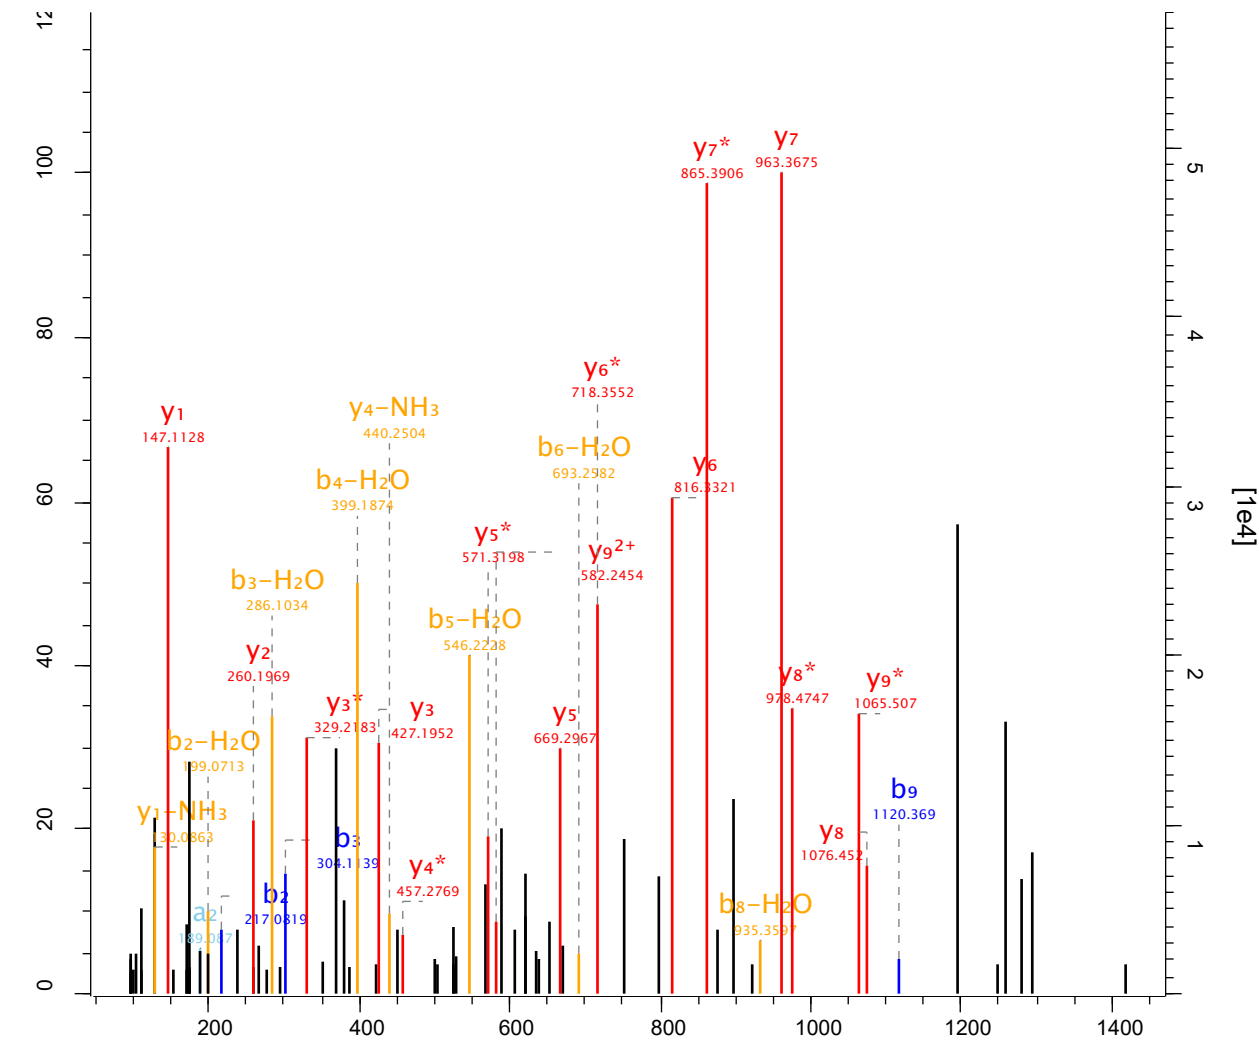

- E S S L M M N Q S I K -  
 b<sub>2</sub> b<sub>3</sub> b<sub>9</sub>

Raw file Scan Method Score m/z  
 sys\_15\_1 7409 FTMS; HCD 68.48 756.32

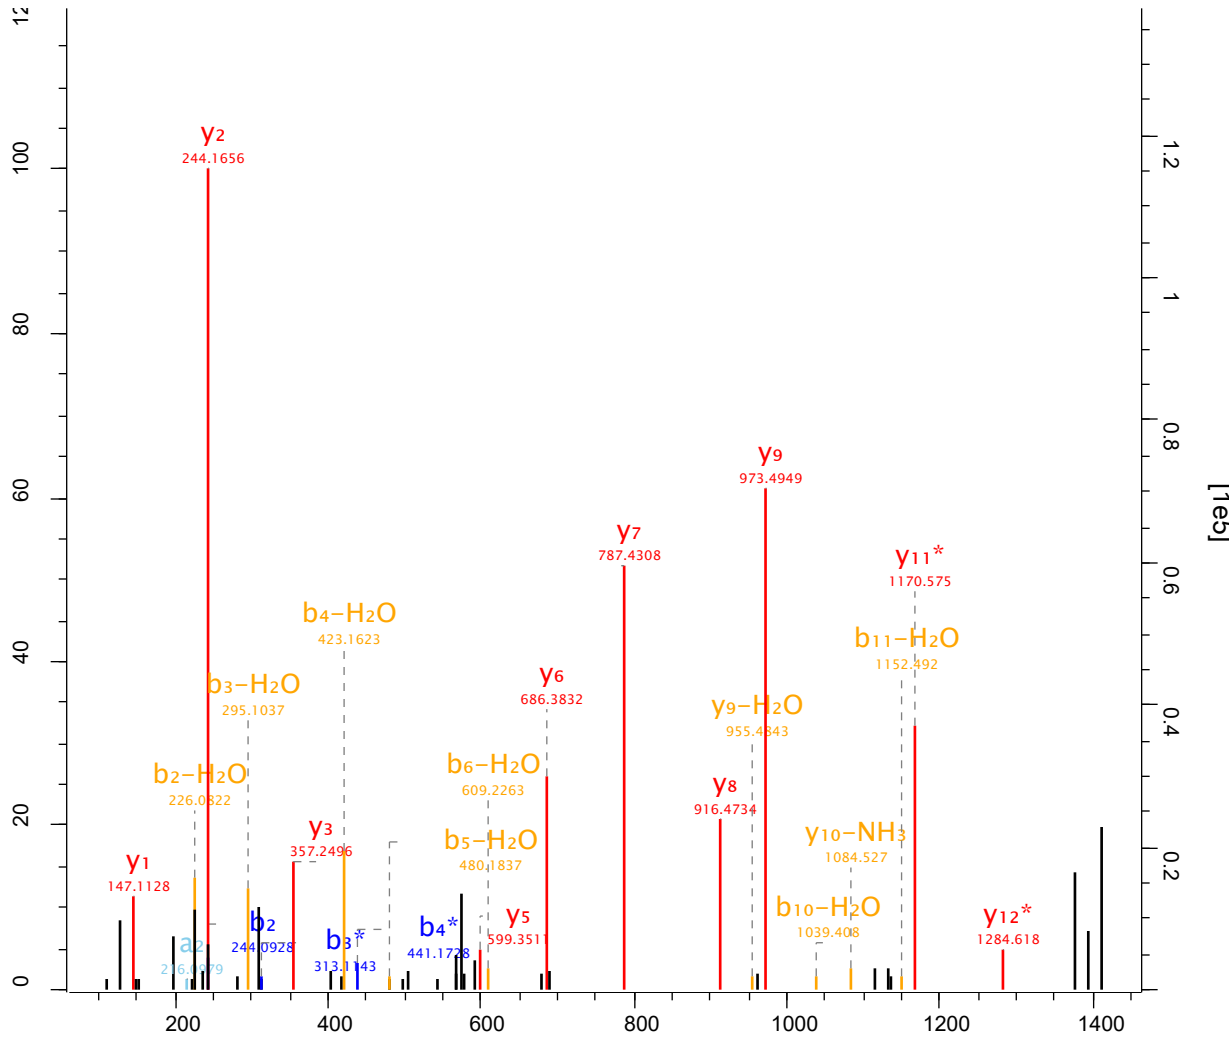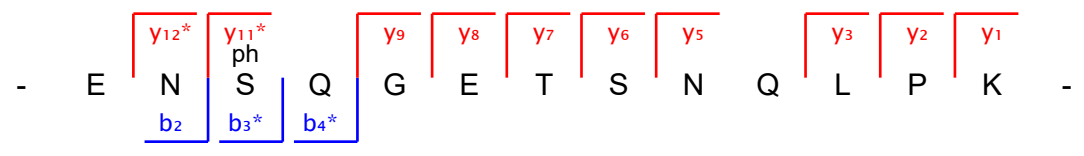

Raw file Scan Method Score m/z  
 sys\_15\_1 7423 FTMS; HCD 99.06 658.29

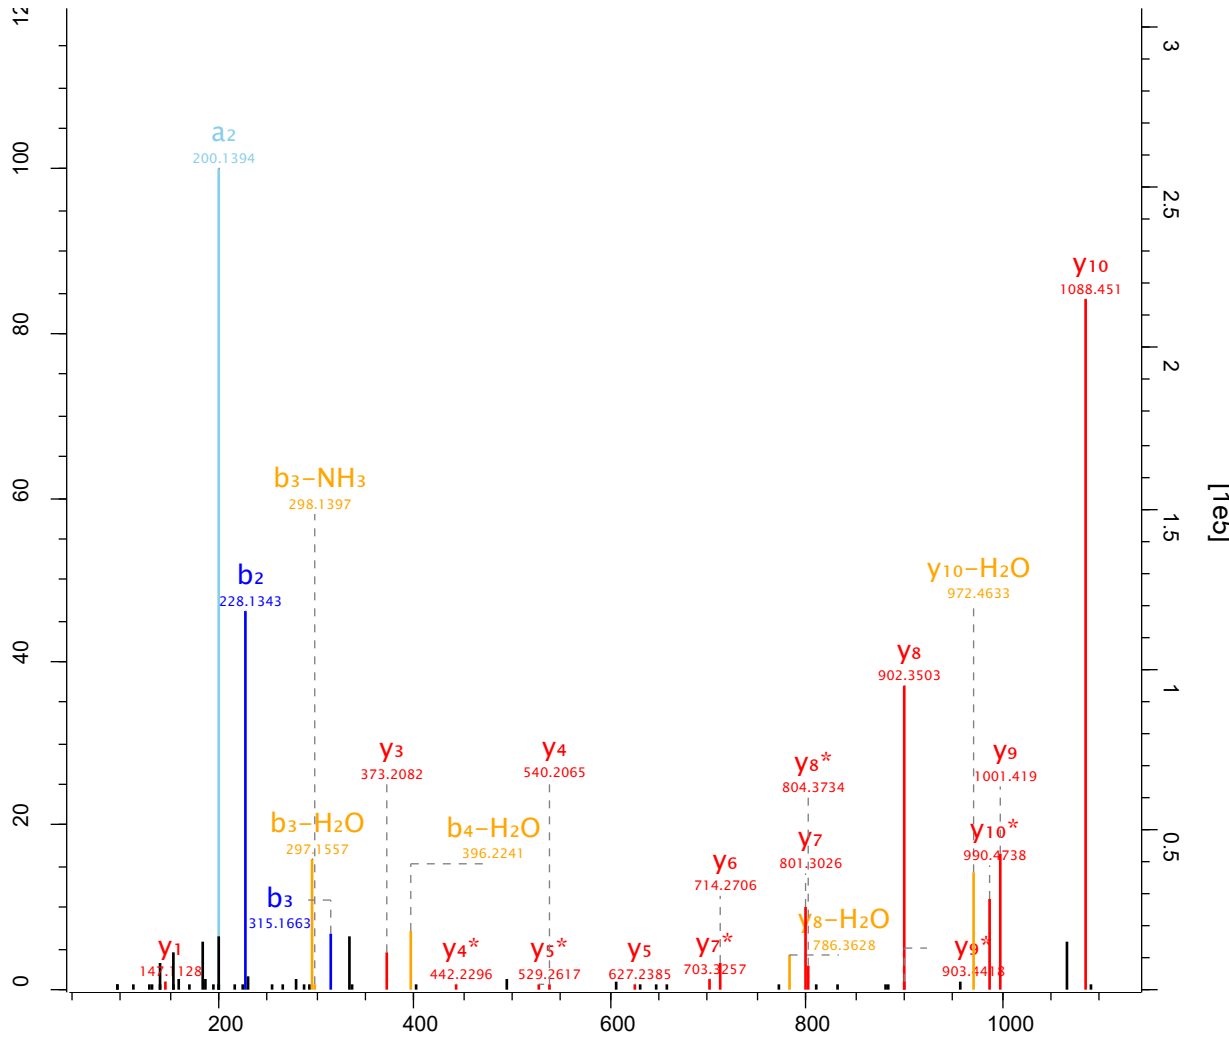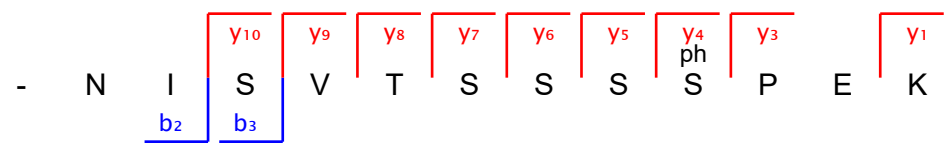

| Raw file | Scan | Method    | Score | m/z   |
|----------|------|-----------|-------|-------|
| sys_15_1 | 7559 | FTMS; HCD | 61.59 | 452.2 |

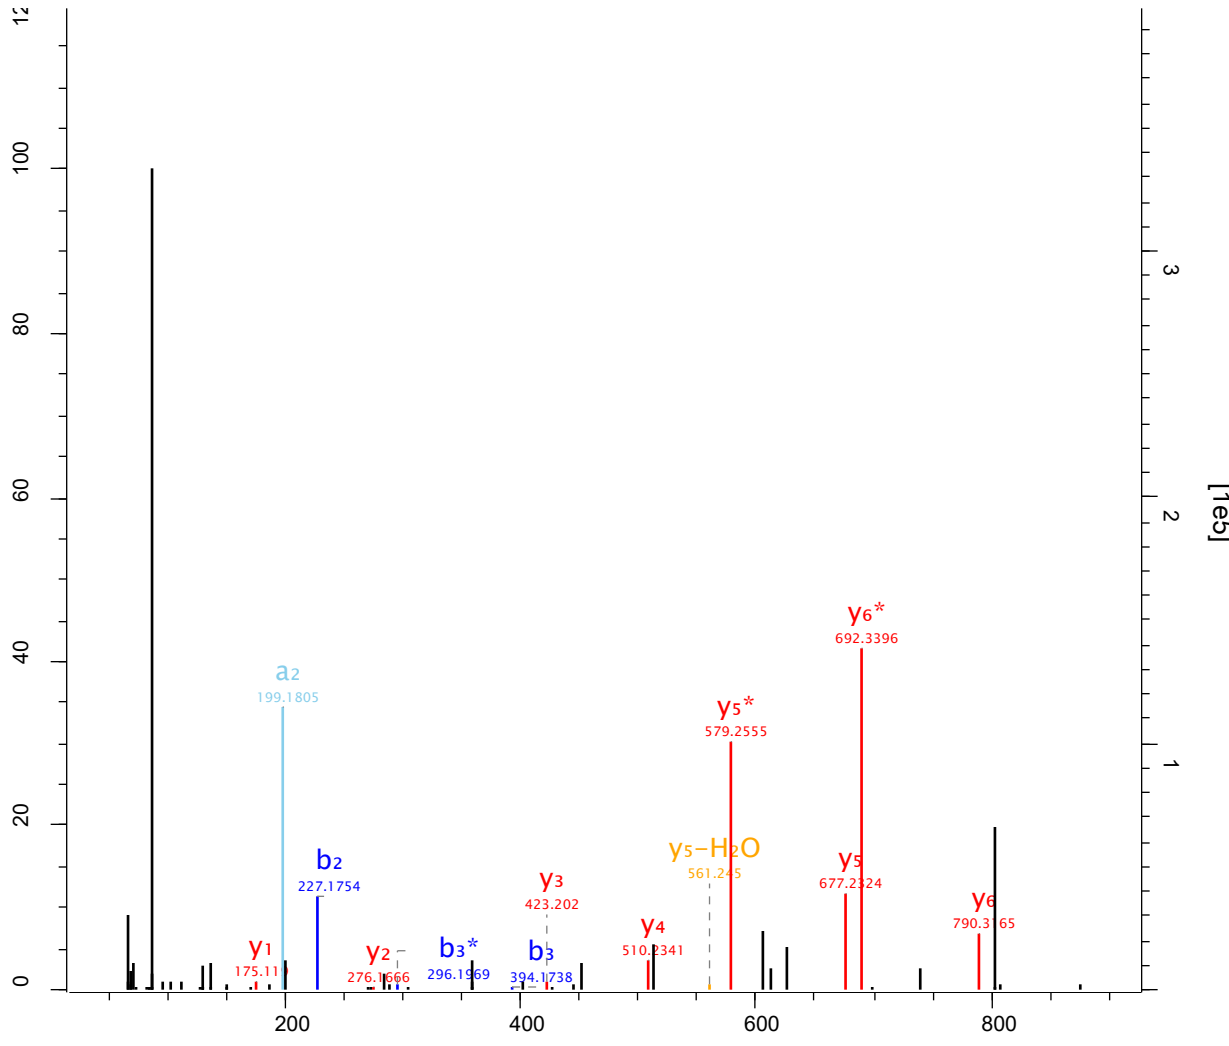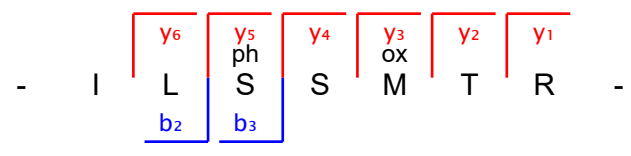

Raw file Scan Method Score m/z  
 sys\_15\_1 7591 FTMS; HCD 51.76 768.77

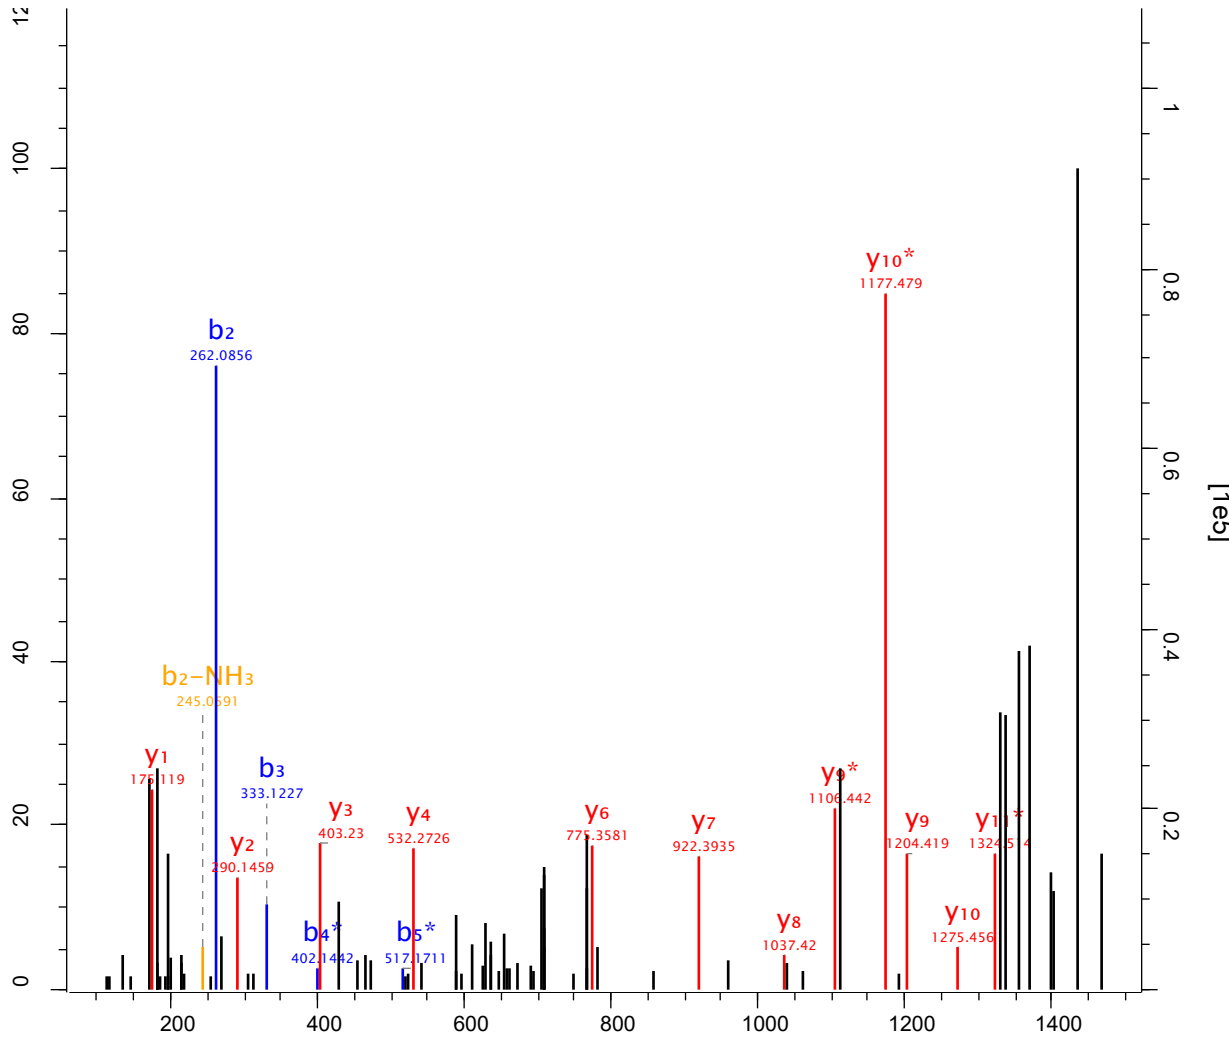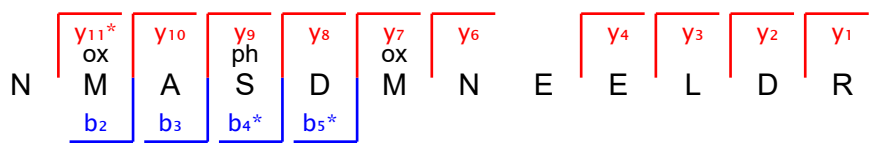

Raw file Scan Method Score m/z  
 sys\_15\_1 7627 FTMS; HCD 67.14 673.74

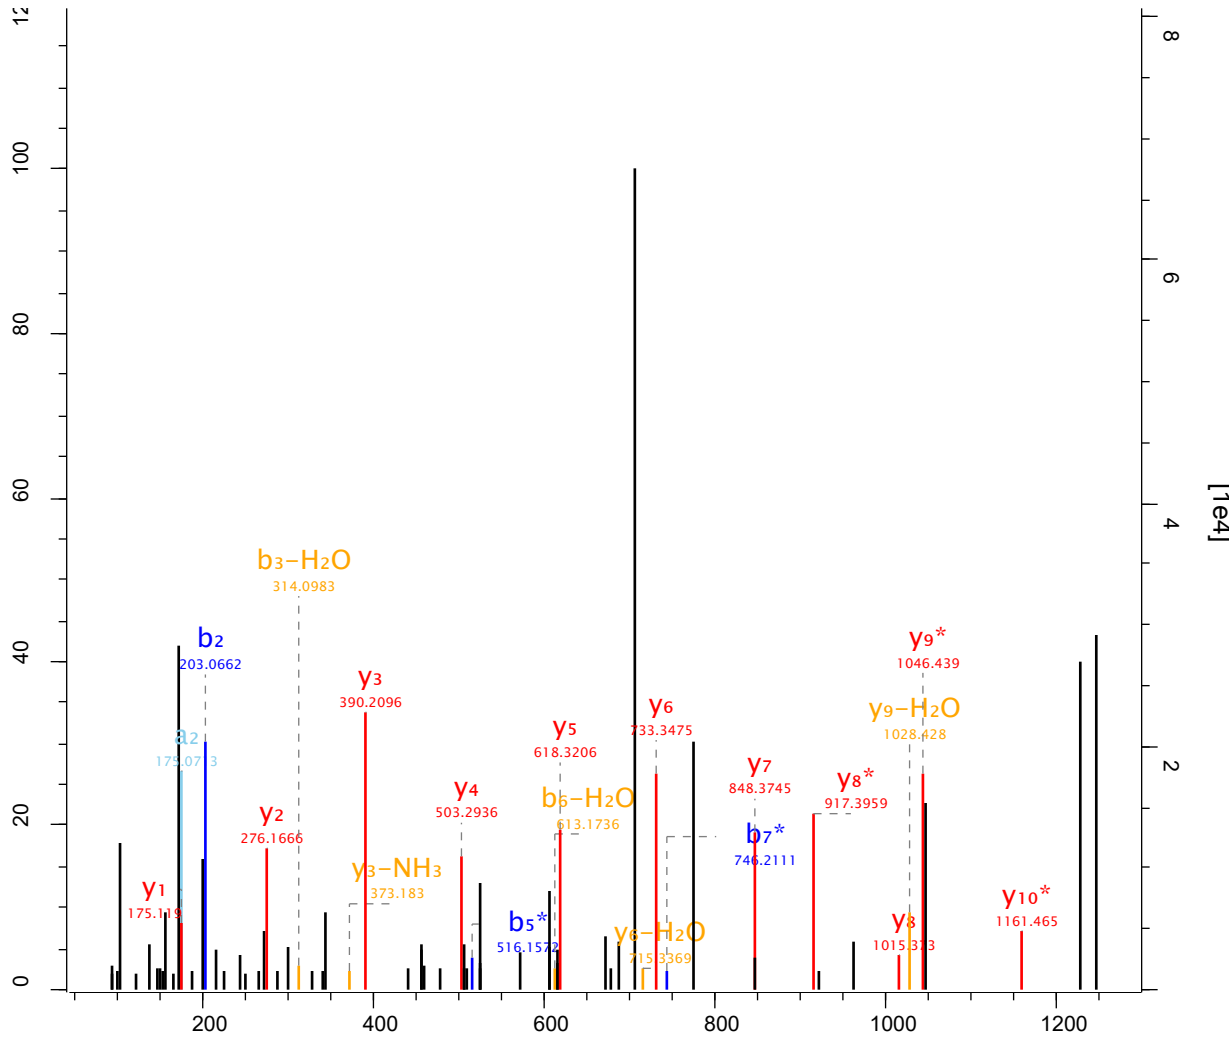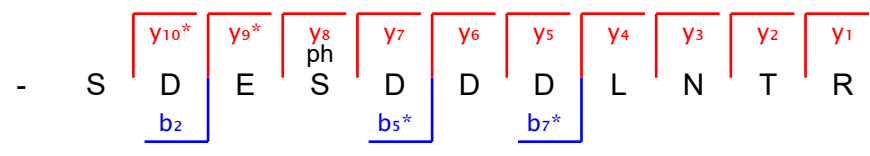

Raw file Scan Method Score m/z  
 sys\_15\_1 7720 FTMS; HCD 139.86 597.26

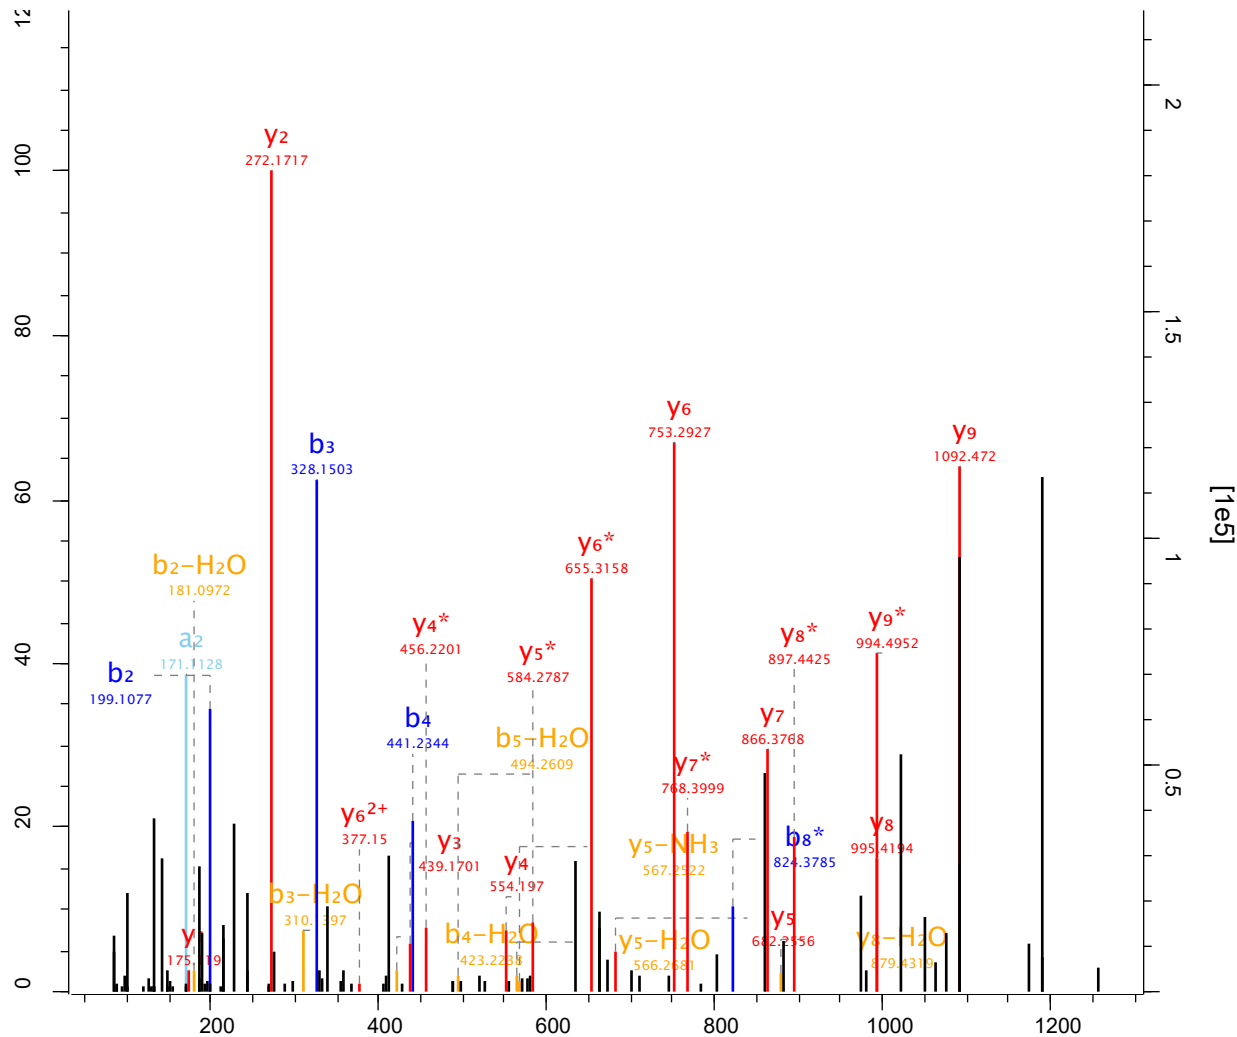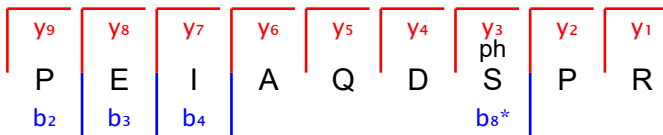

Raw file Scan Method Score m/z  
 sys\_15\_1 7756 FTMS; HCD 109.72 678.8

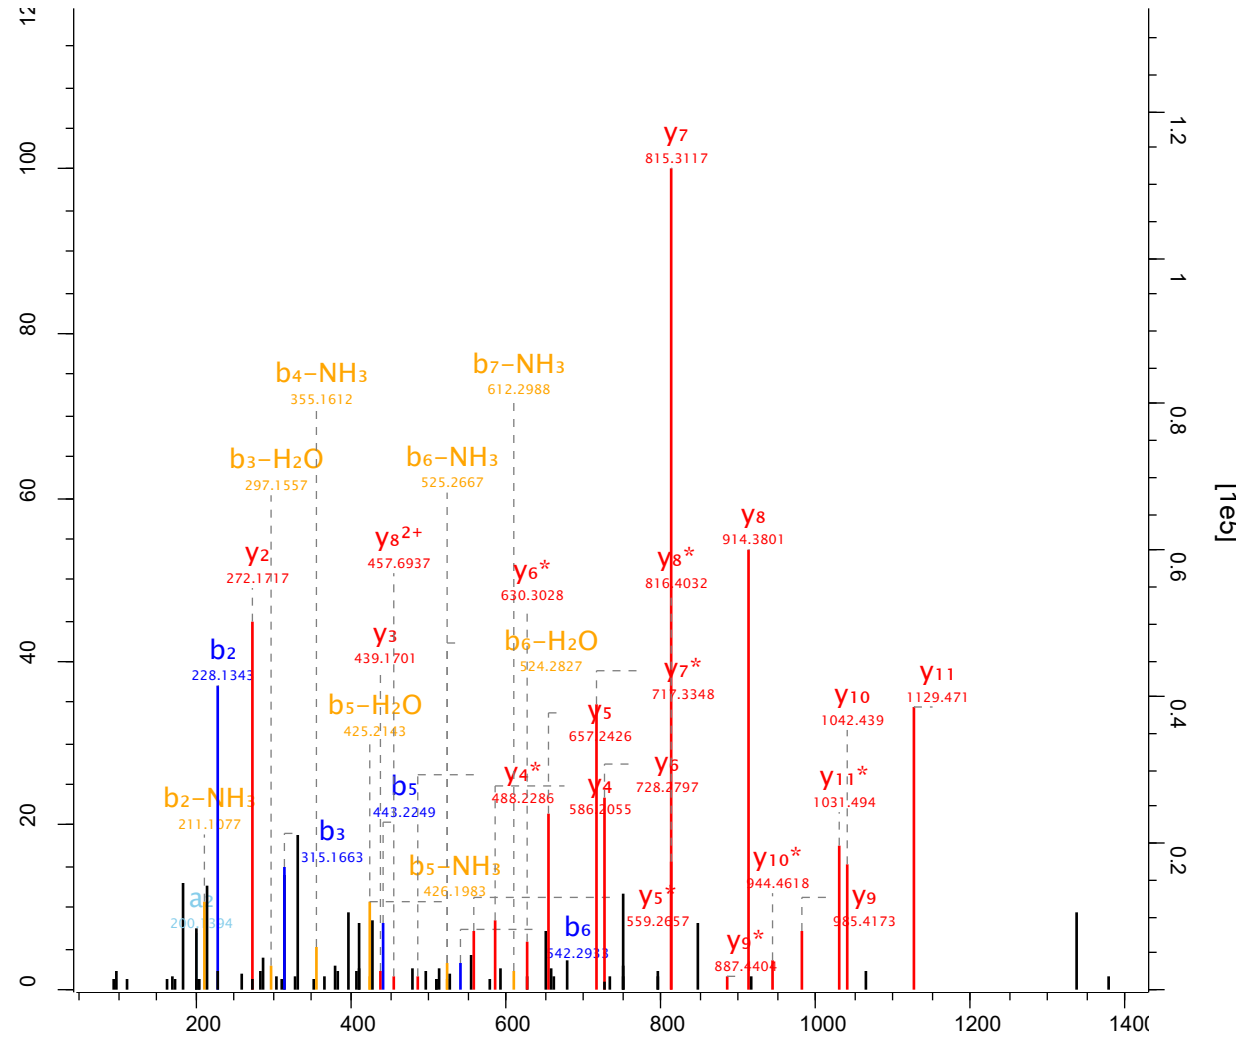

- L N S G A V S A A M S P R -

b<sub>2</sub>
b<sub>3</sub>
b<sub>5</sub>
b<sub>6</sub>
y<sub>11</sub>
y<sub>10</sub>
y<sub>9</sub>
y<sub>8</sub>
y<sub>7</sub>
y<sub>6</sub>
y<sub>5</sub>
y<sub>4</sub>  
ox
y<sub>3</sub>  
ph
y<sub>2</sub>



Raw file Scan Method Score m/z  
 sys\_15\_1 7768 FTMS; HCD 118.31 530.74

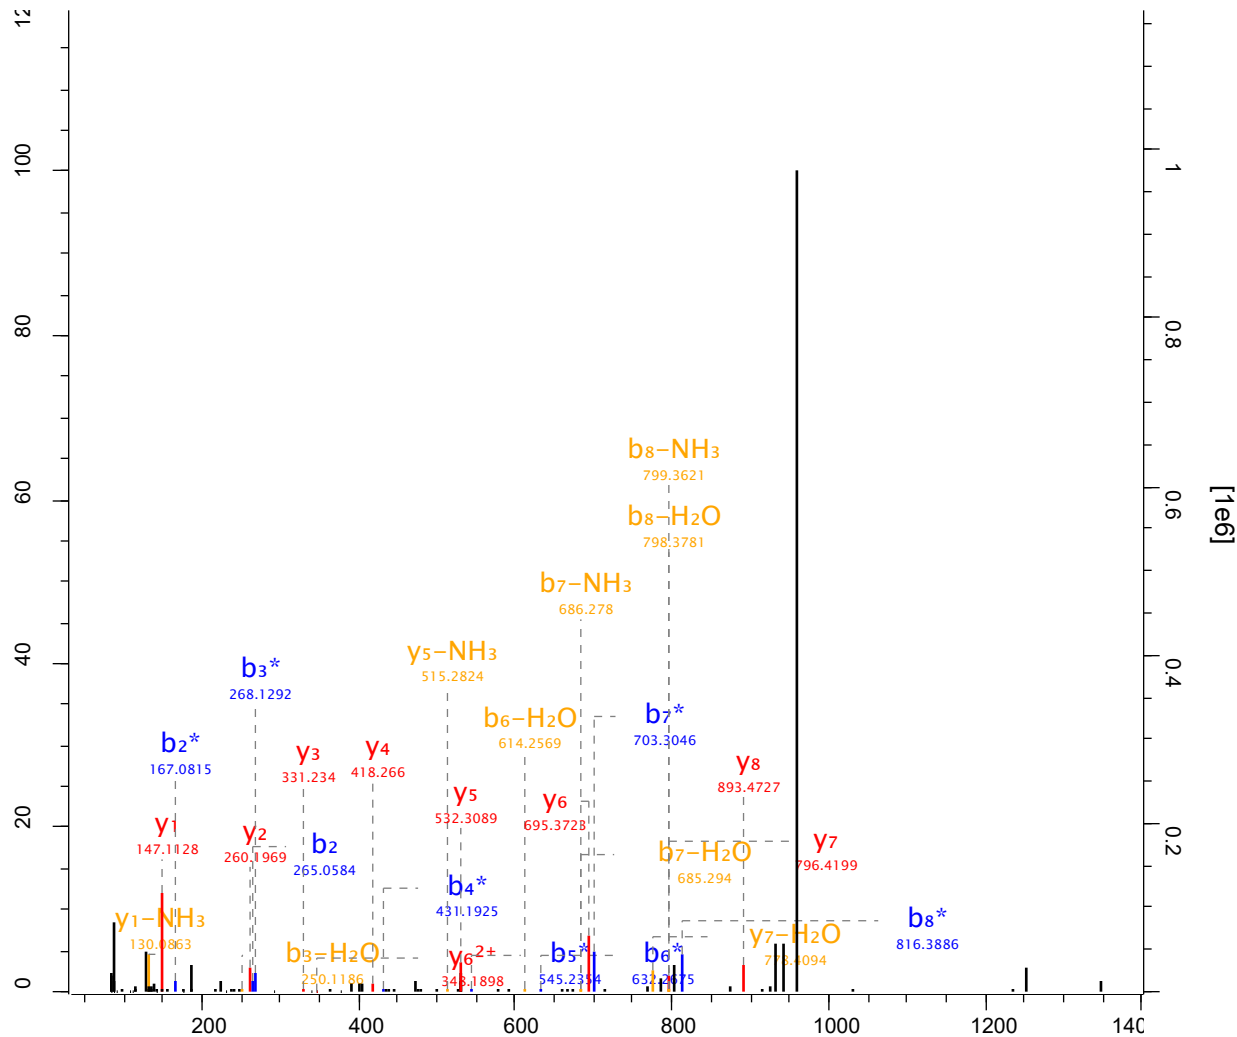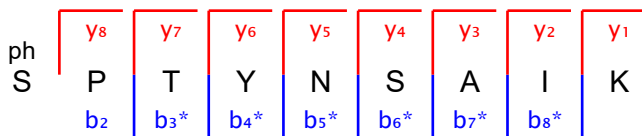

Raw file Scan Method Score m/z  
 sys\_15\_1 7846 FTMS; HCD 67.14 680.76

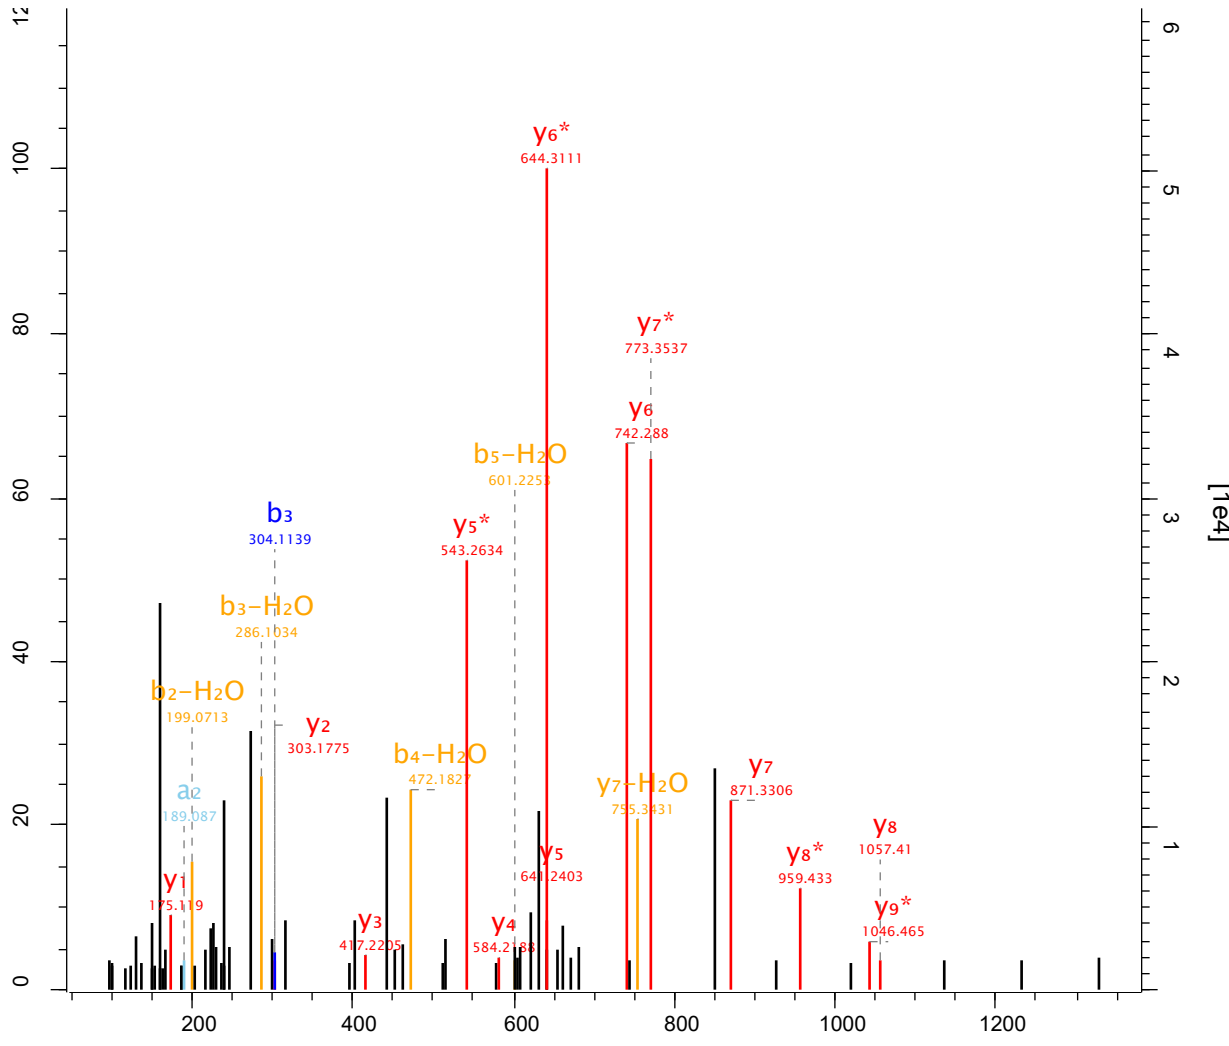

- E S S W E T G S N Q R -  
 a2 b3 y9\* y8 y7 y6 y5 y4 ph y3 y2 y1

Raw file Scan Method Score m/z  
 sys\_15\_1 7861 FTMS; HCD 47.6 528.23

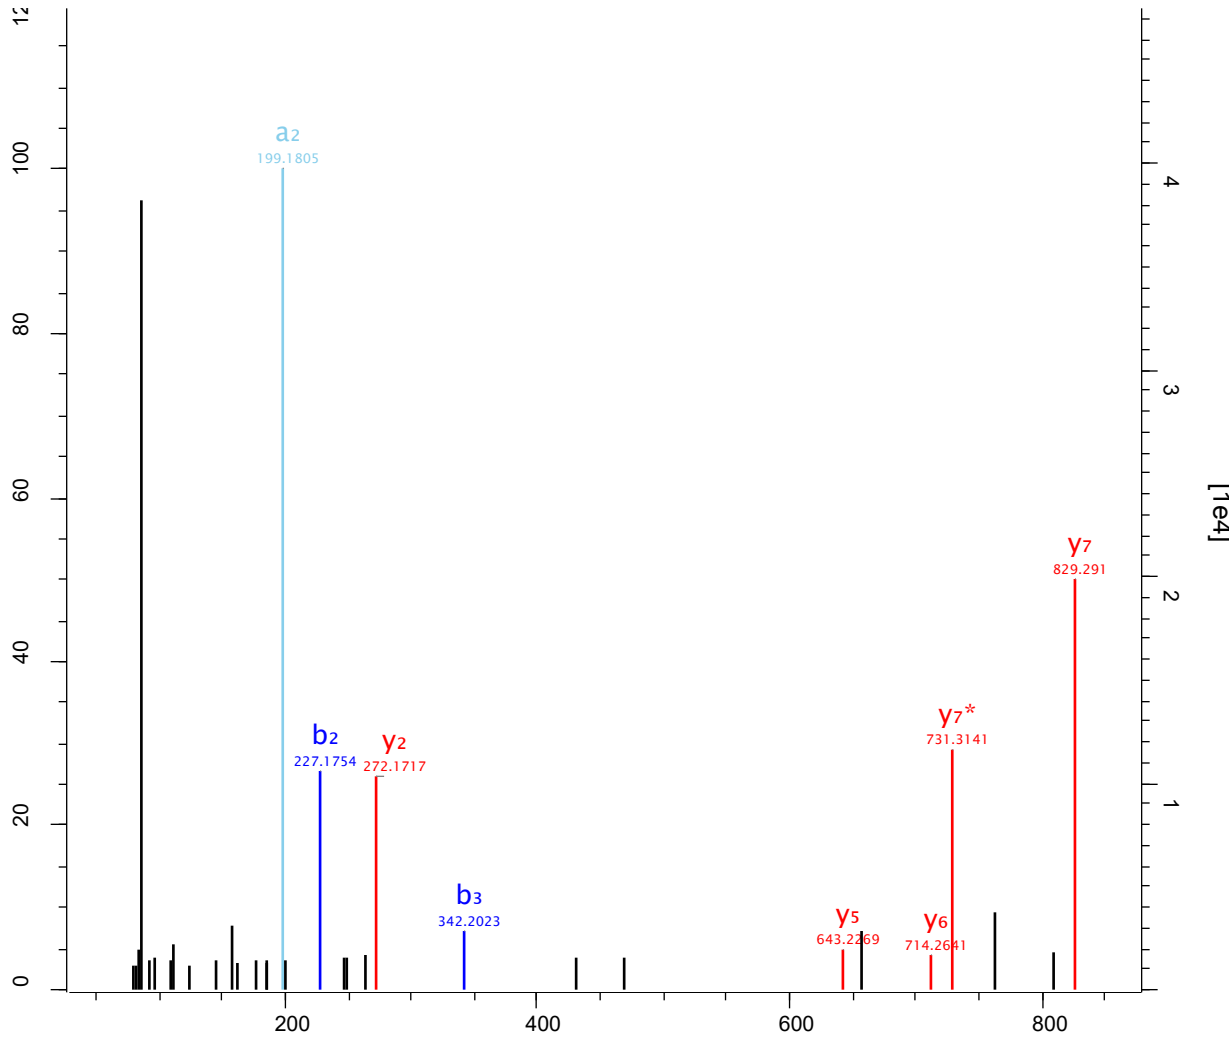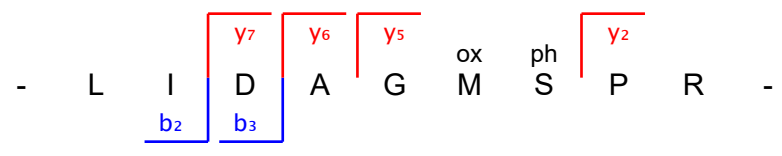

Raw file Scan Method Score m/z  
 sys\_15\_1 7873 FTMS; HCD 70.89 686.77

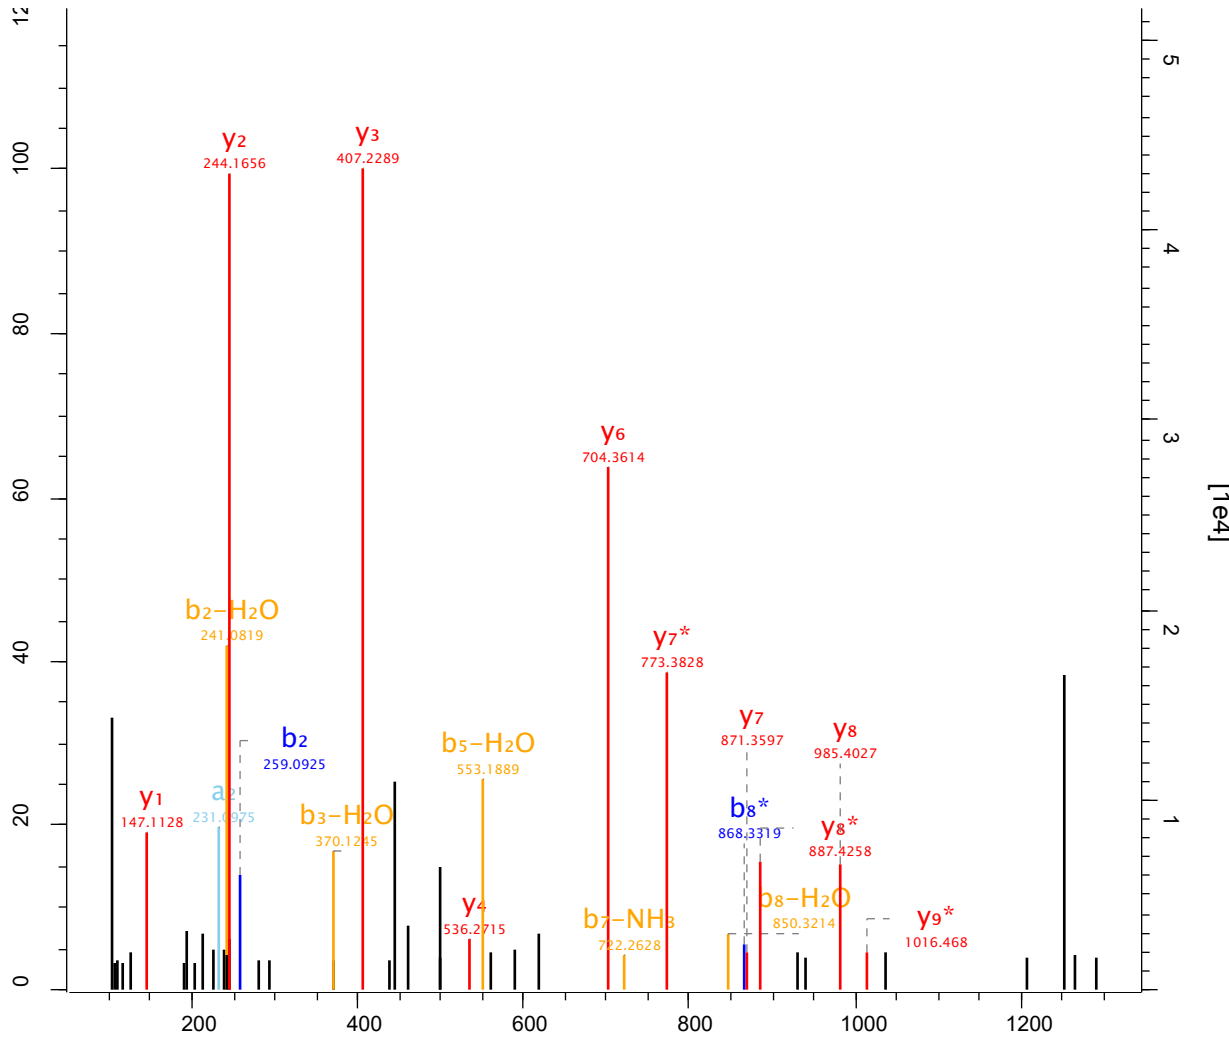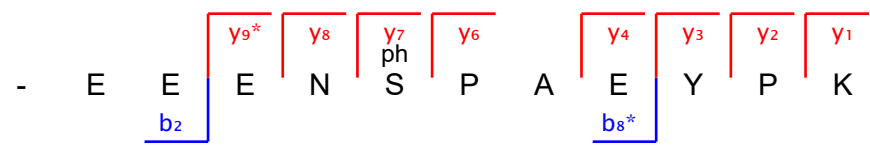

Raw file Scan Method Score m/z  
 sys\_15\_1 7904 FTMS; HCD 88.02 603.78

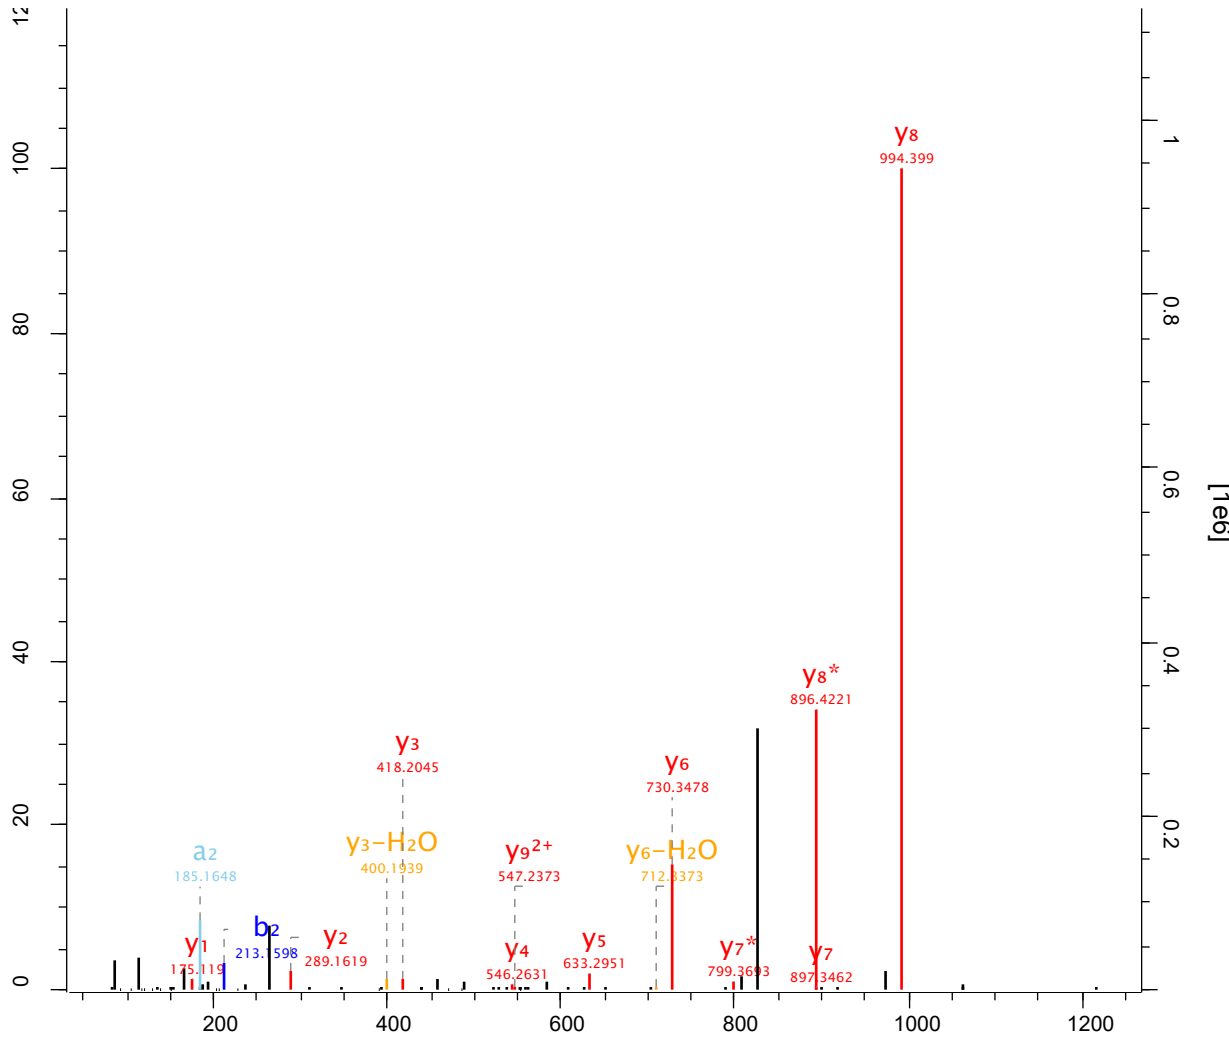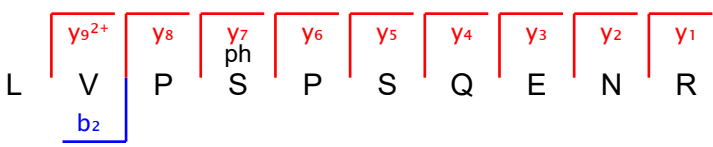

Raw file Scan Method Score m/z  
 sys\_15\_1 7980 FTMS; HCD 179.14 783.79

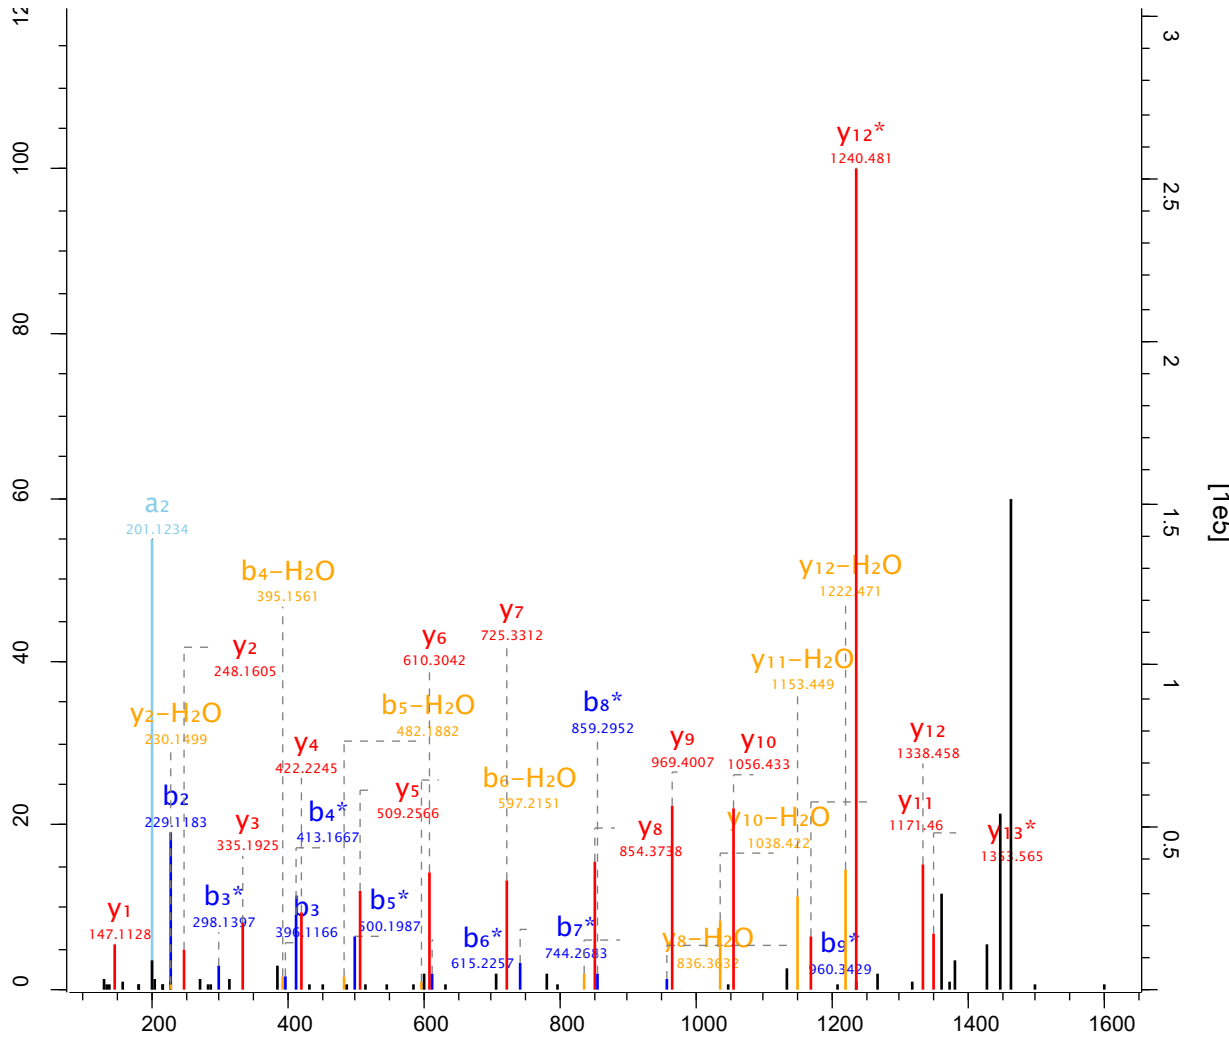

- D L L S D S D E D T S S S T K -

y13\*
y12
y11
y10
y9
y8
y7
y6
y5
y4
y3
y2
y1

b2
b3
b4\*
b5\*
b6\*
b7\*
b8\*
b9\*

Raw file Scan Method Score m/z  
 sys\_15\_1 8139 FTMS; HCD 84.76 636.26

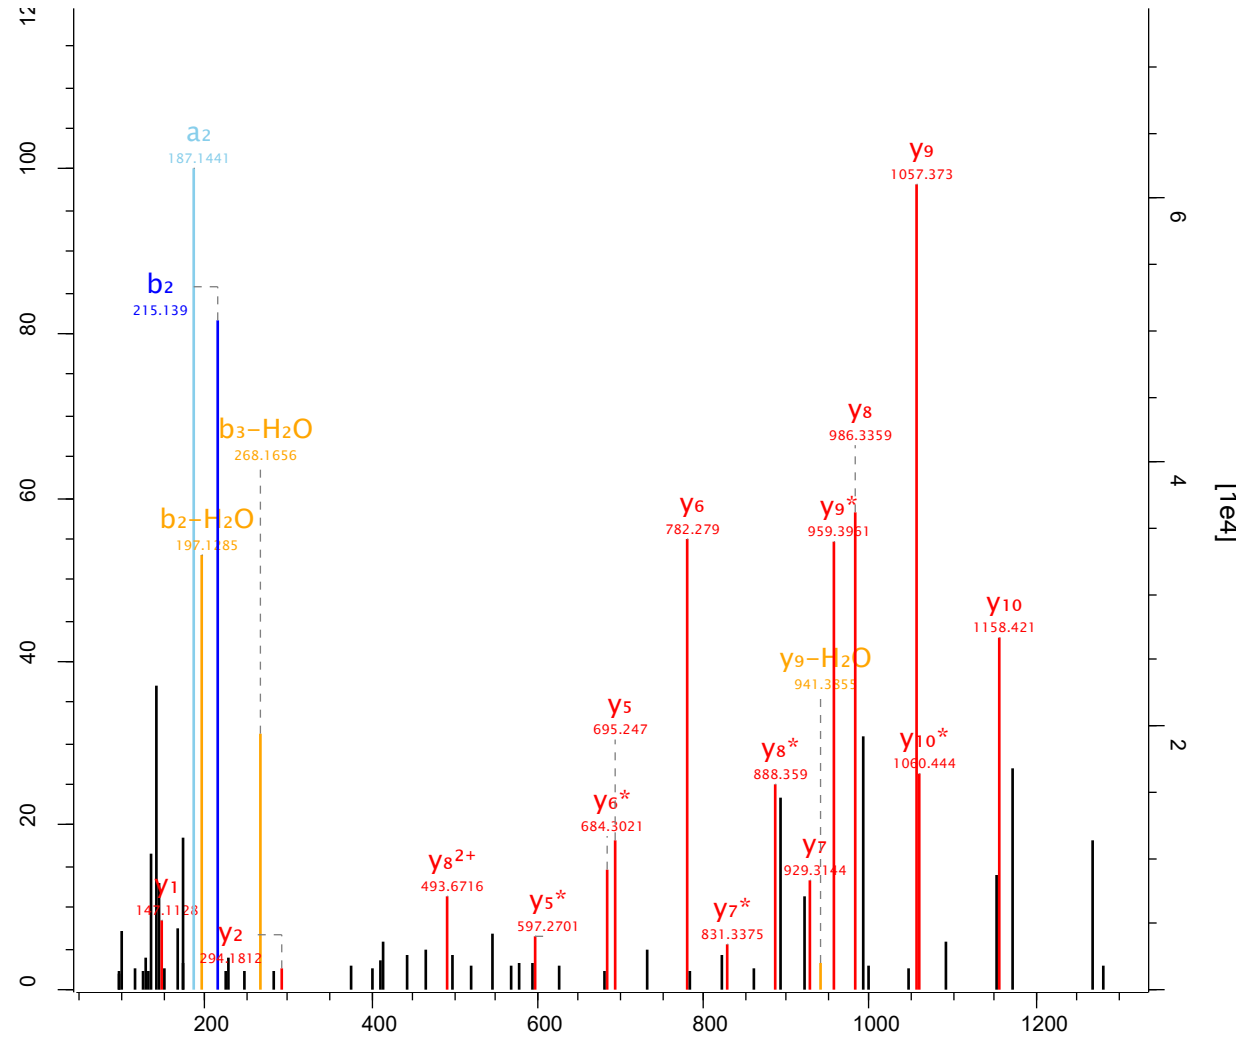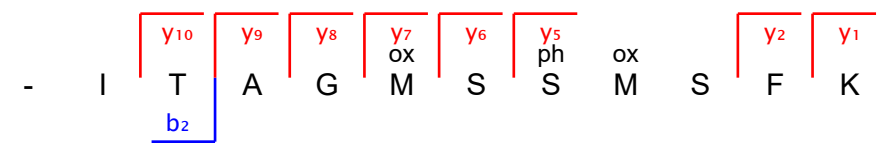

Raw file Scan Method Score m/z  
 sys\_15\_1 8143 FTMS; HCD 65.04 659.75

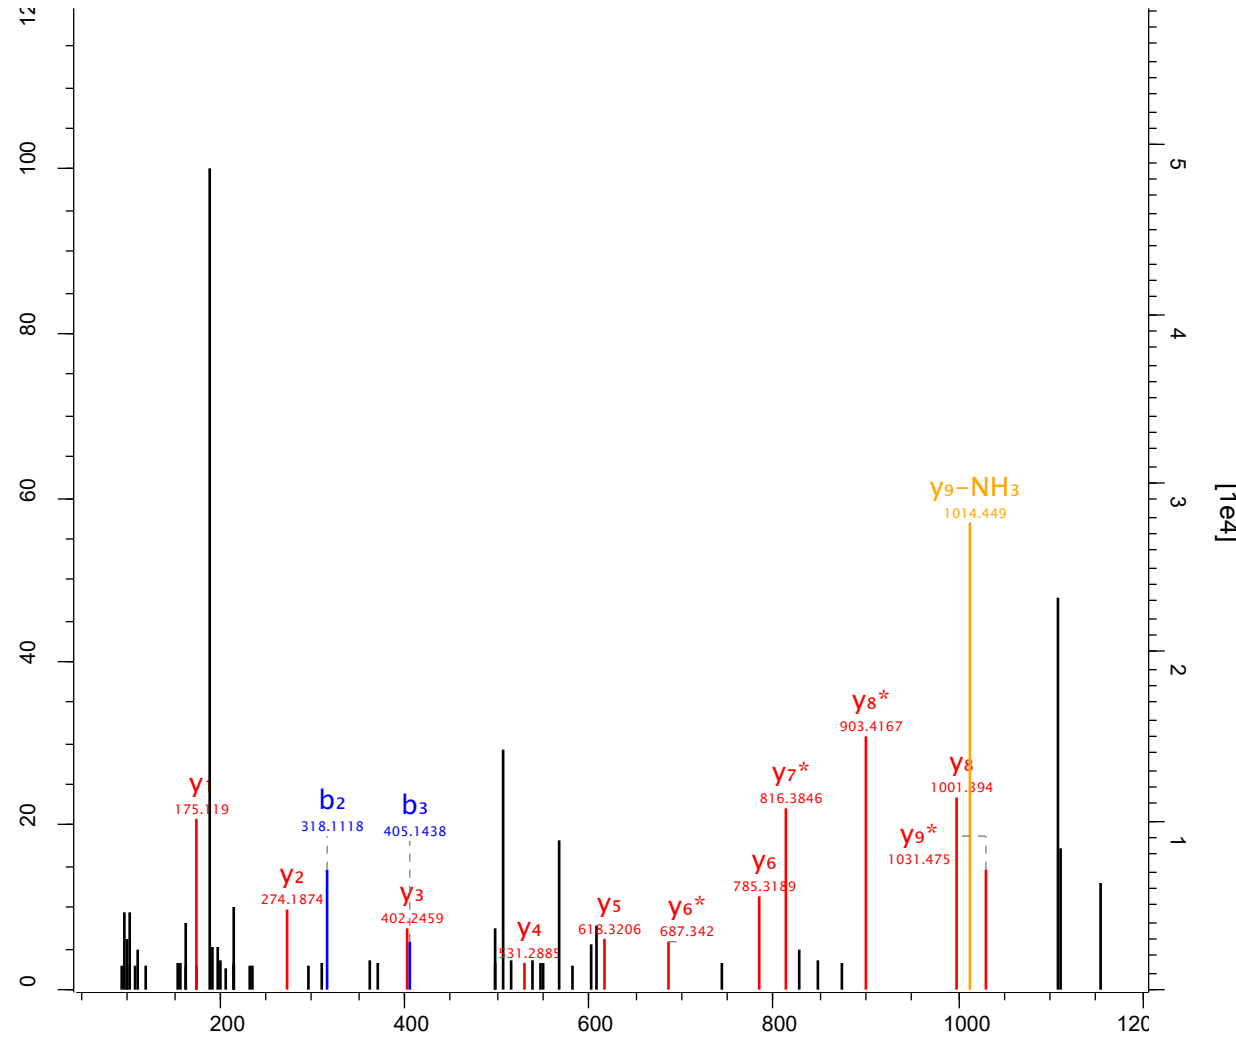

ac ox M Q S E S S E Q V R -  
 b2 b3



Raw file Scan Method Score m/z  
 sys\_15\_1 8169 FTMS; HCD 198.04 735.8

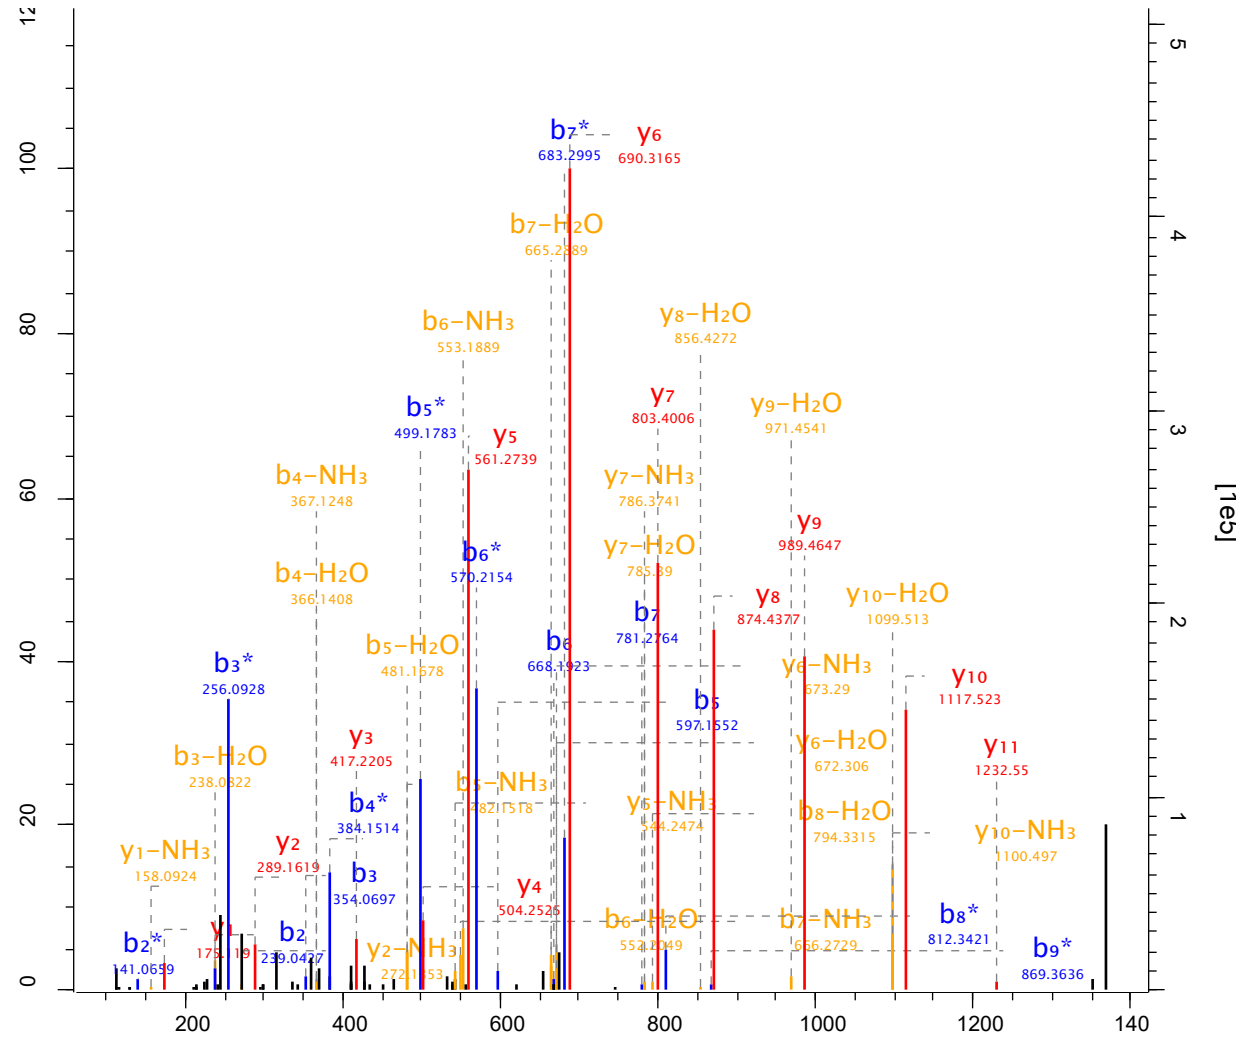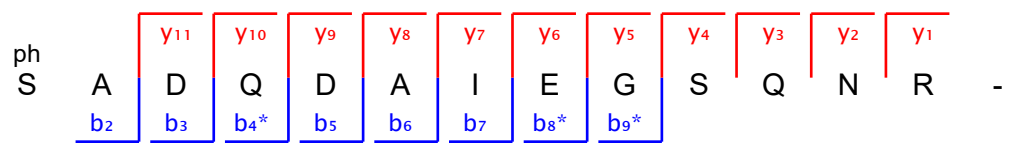

| Raw file | Scan | Method    | Score | m/z    |
|----------|------|-----------|-------|--------|
| sys_15_1 | 8189 | FTMS; HCD | 51.29 | 541.68 |

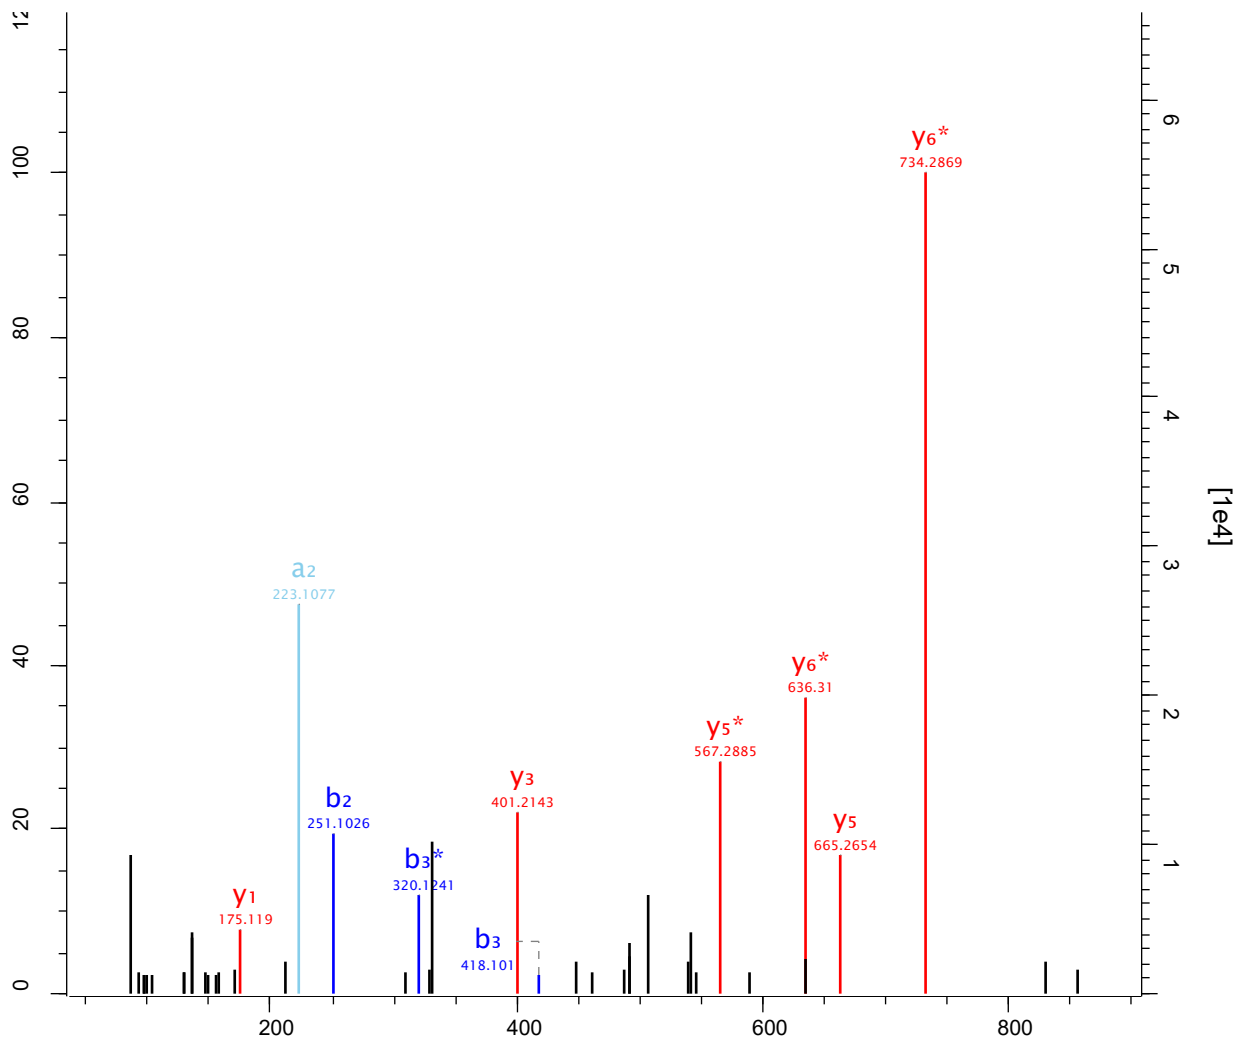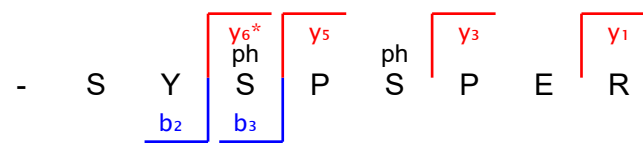

Raw file Scan Method Score m/z  
 sys\_15\_1 8202 FTMS; HCD 125.82 587.75

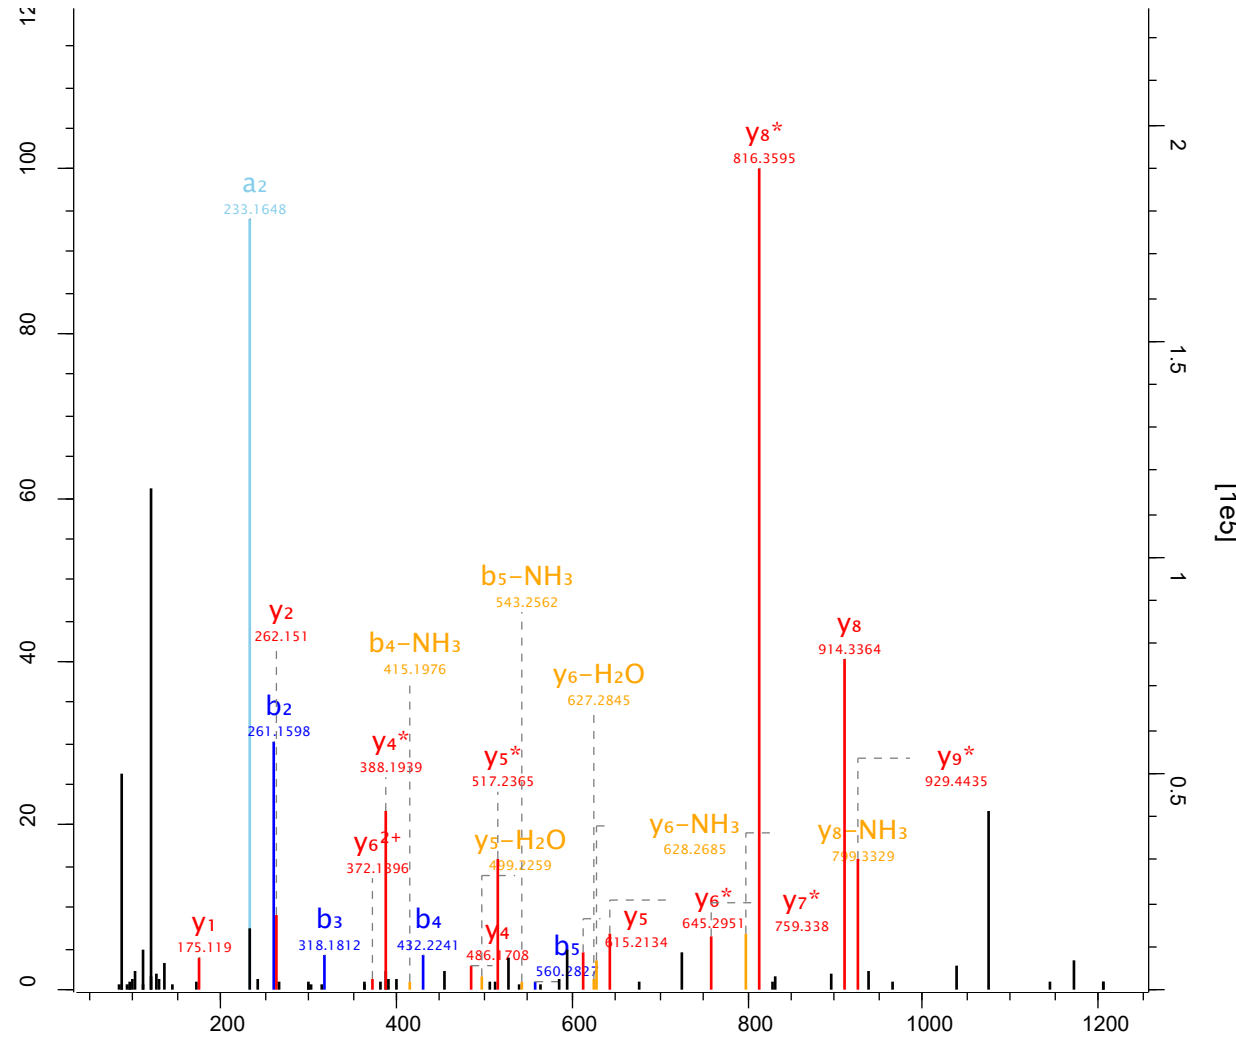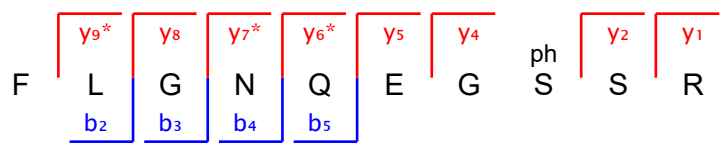

Raw file Scan Method Score m/z  
 sys\_15\_1 8239 FTMS; HCD 54.09 643.58

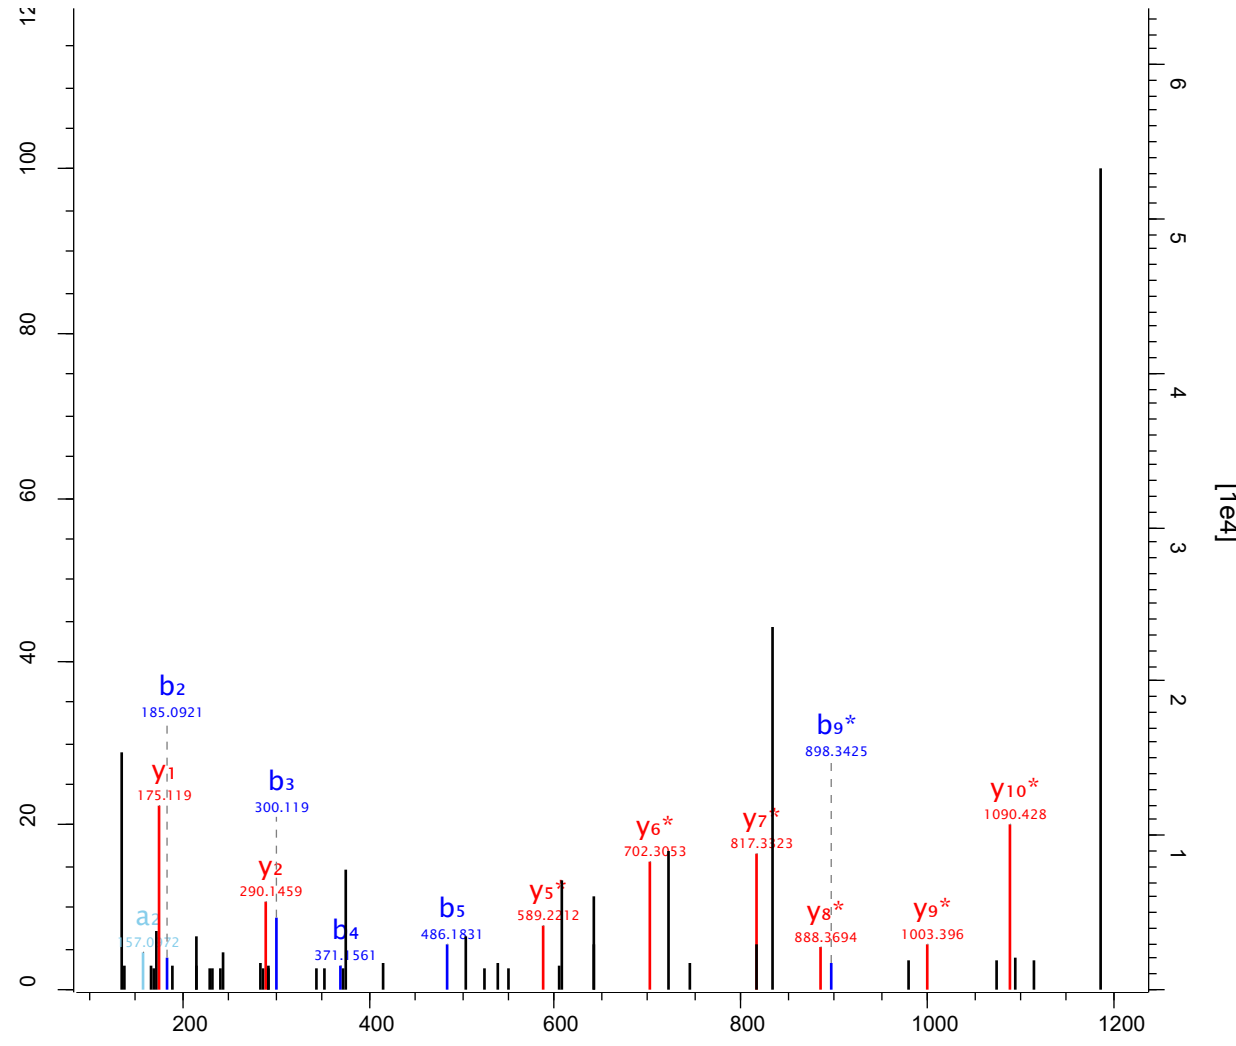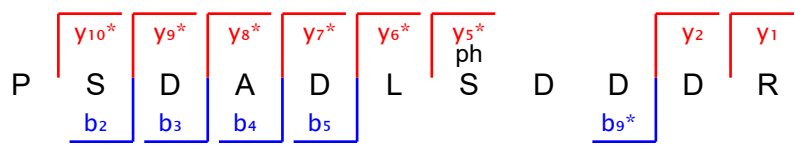

Raw file Scan Method Score m/z  
 sys\_15\_1 8287 FTMS; HCD 161.2 869.35

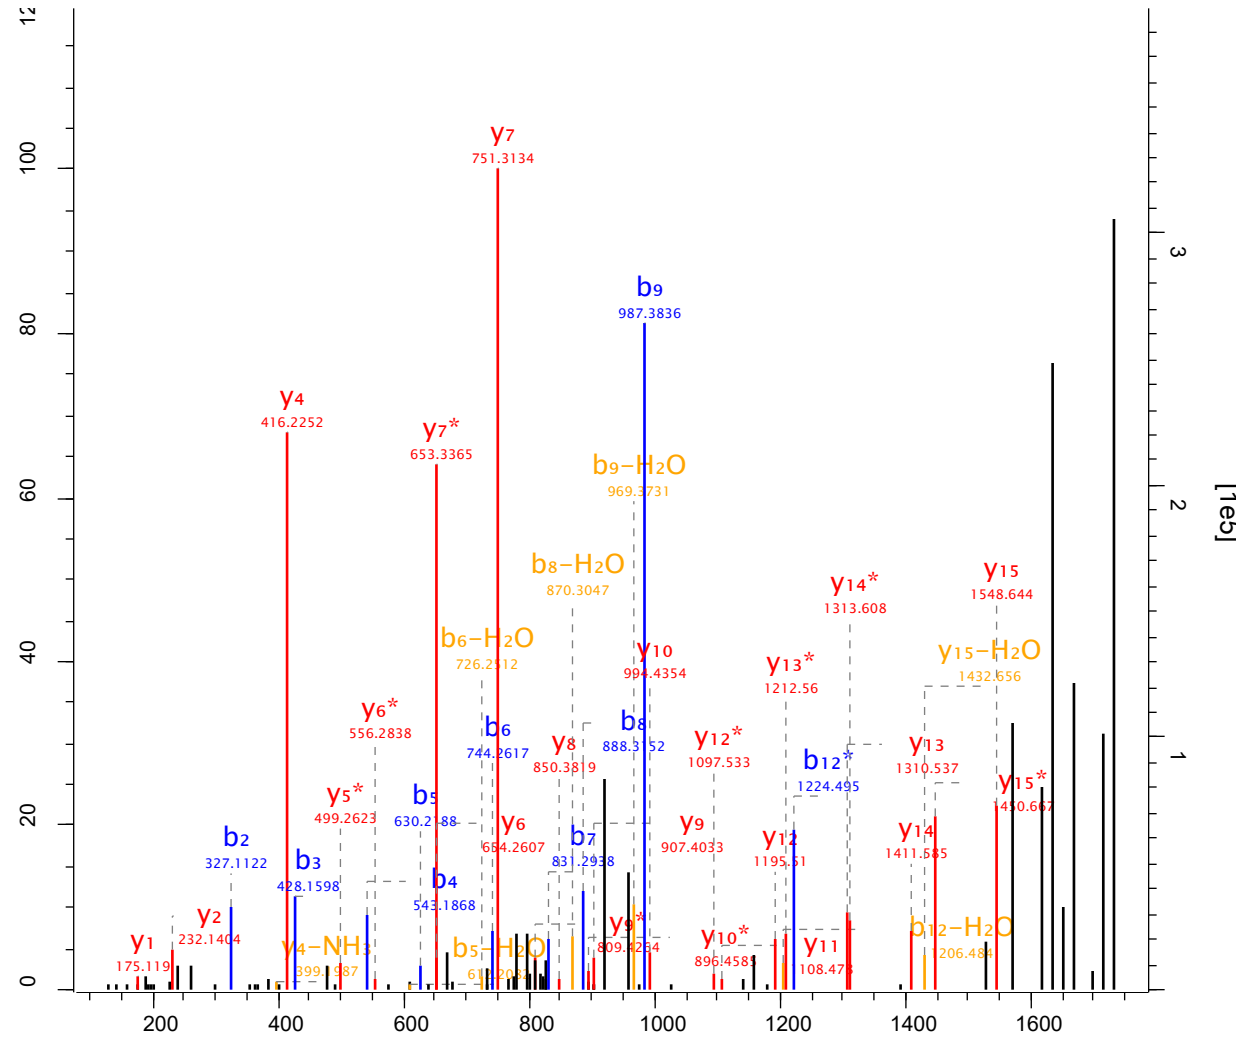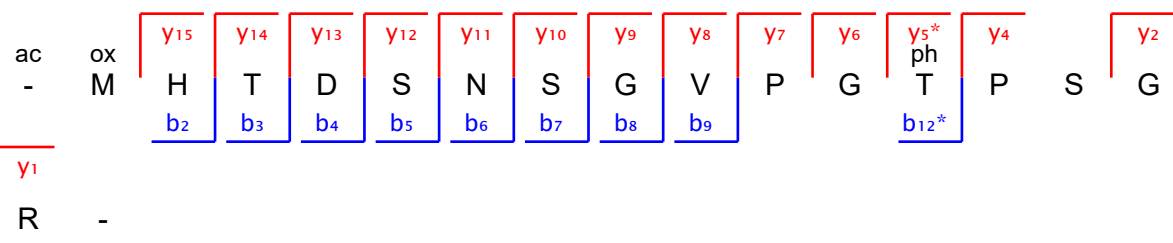

Raw file Scan Method Score m/z  
 sys\_15\_1 8369 FTMS; HCD 191.47 655.77

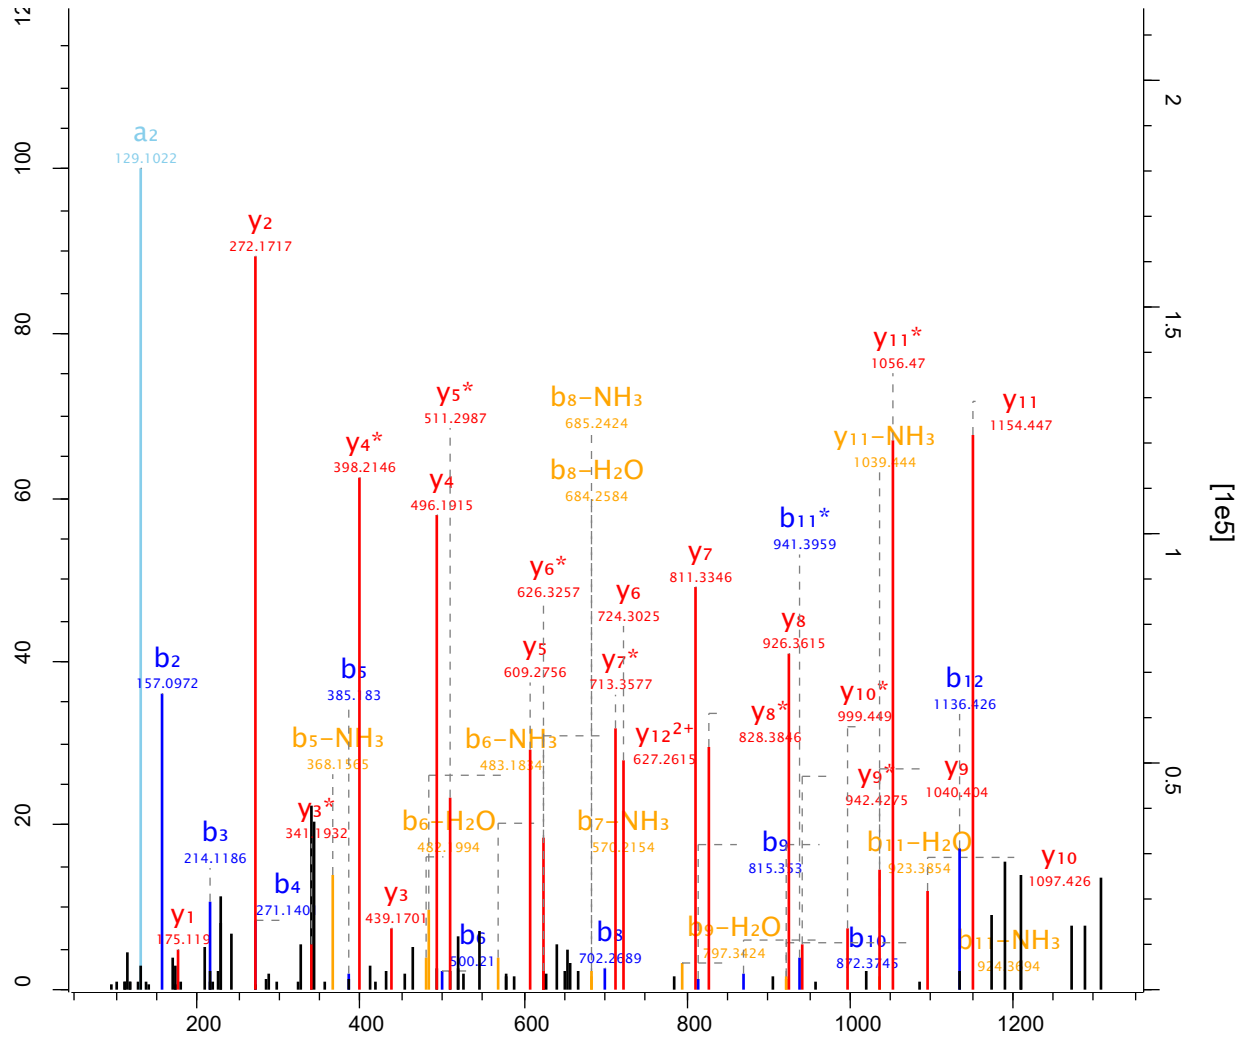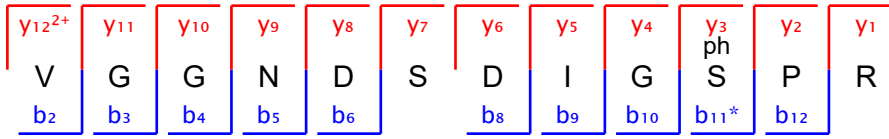

| Raw file | Scan | Method    | Score | m/z    |
|----------|------|-----------|-------|--------|
| sys_15_1 | 8523 | FTMS; HCD | 44.85 | 559.23 |

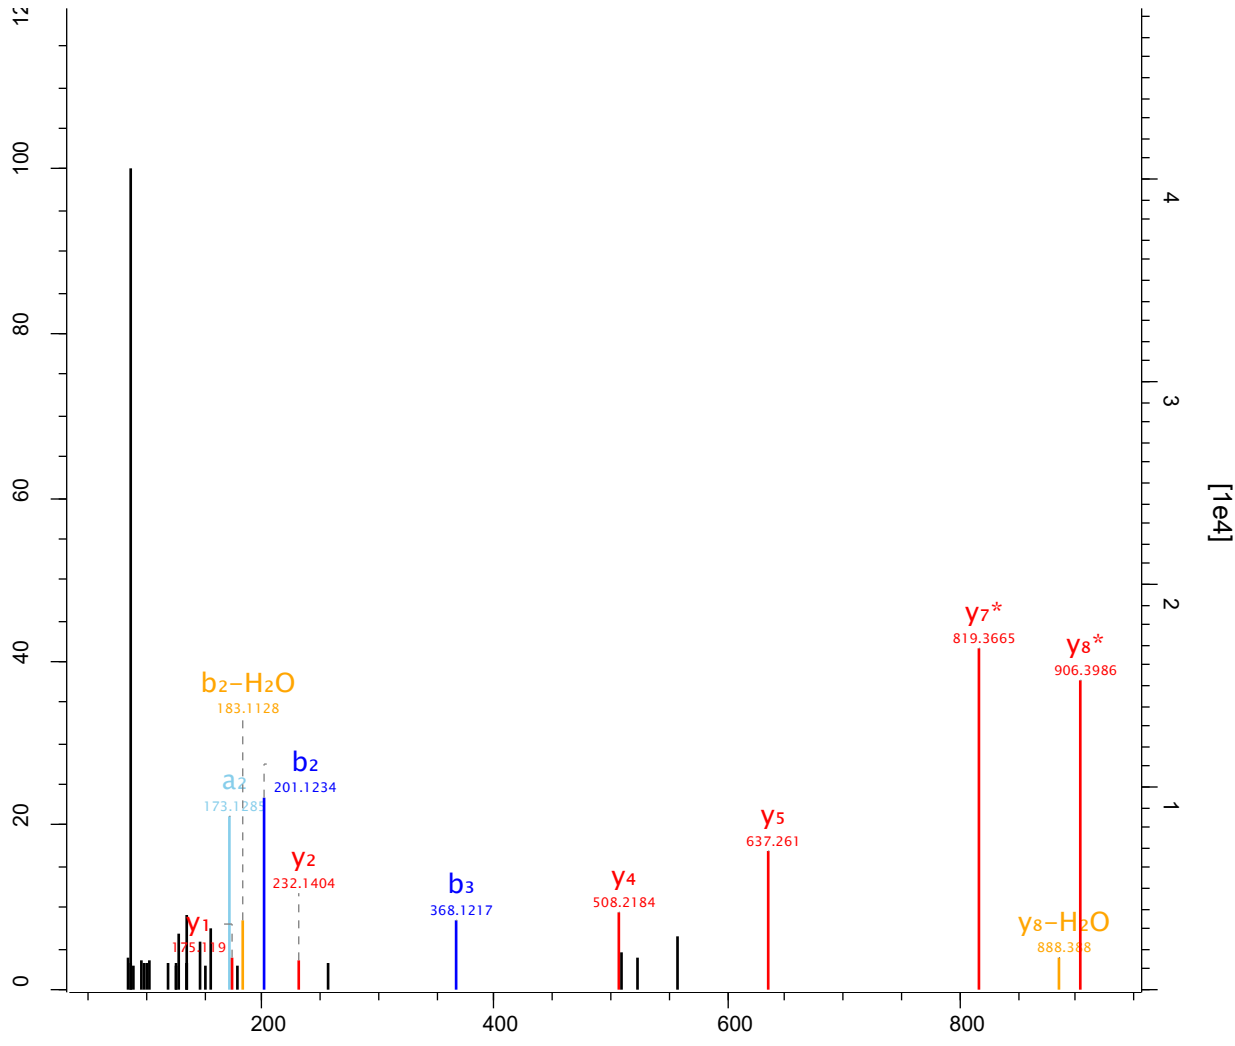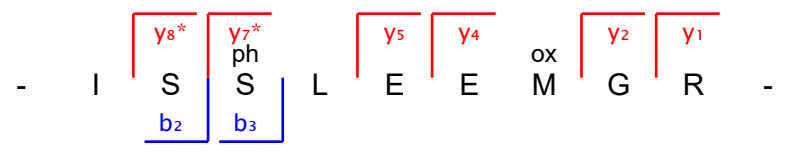

Raw file Scan Method Score m/z  
 sys\_15\_1 8632 FTMS; HCD 210.91 622.28

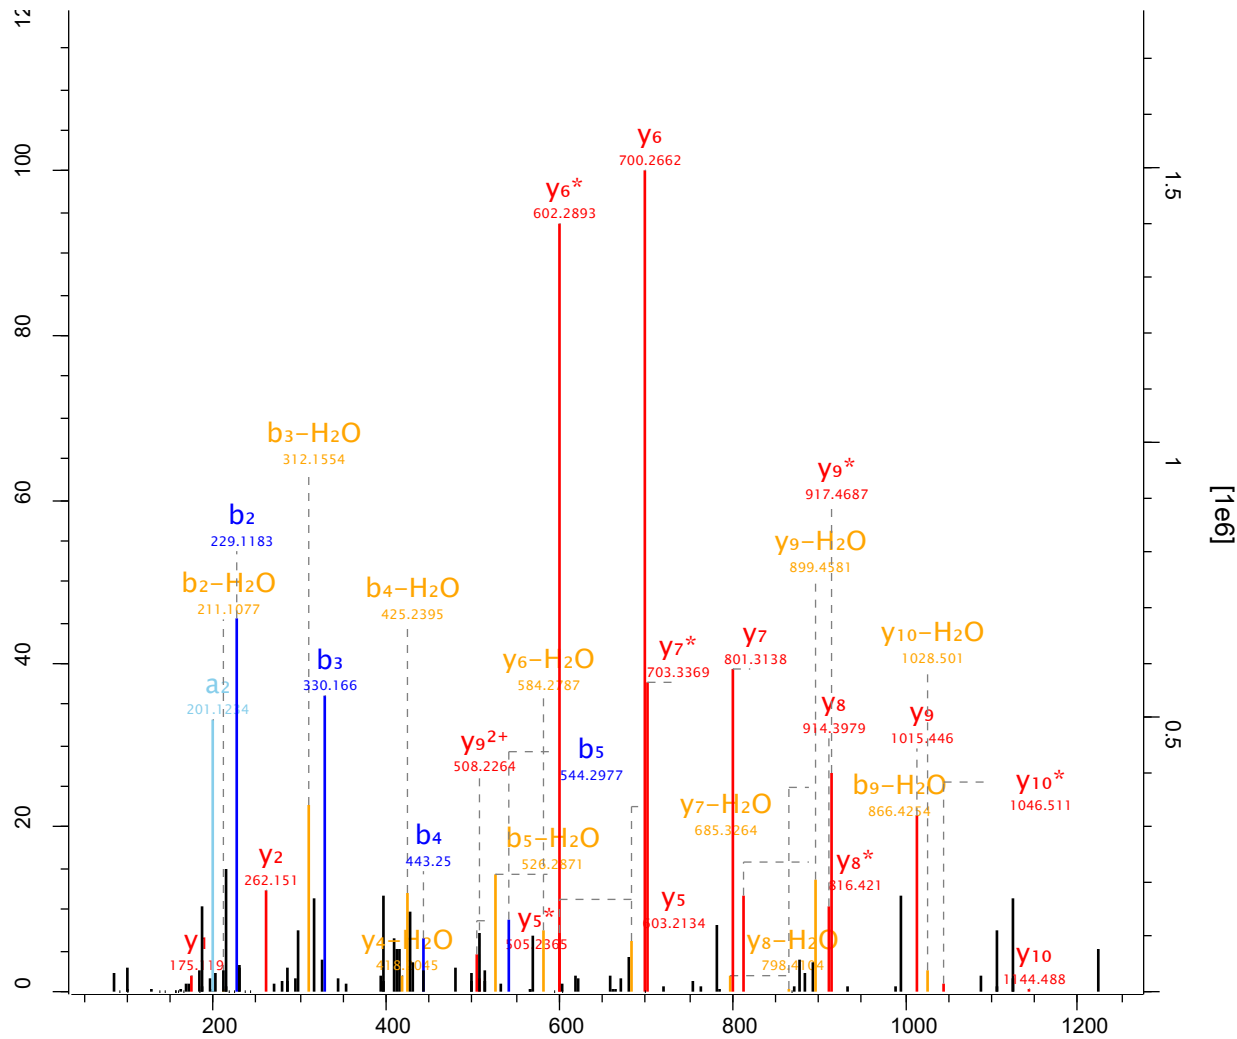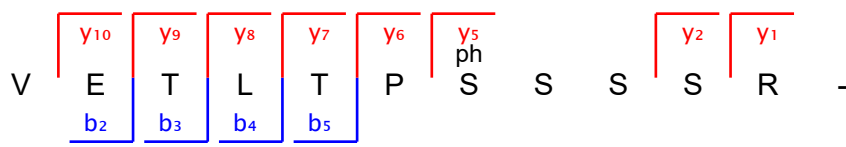



Raw file Scan Method Score m/z  
 sys\_15\_1 8737 FTMS; HCD 63.68 649.31

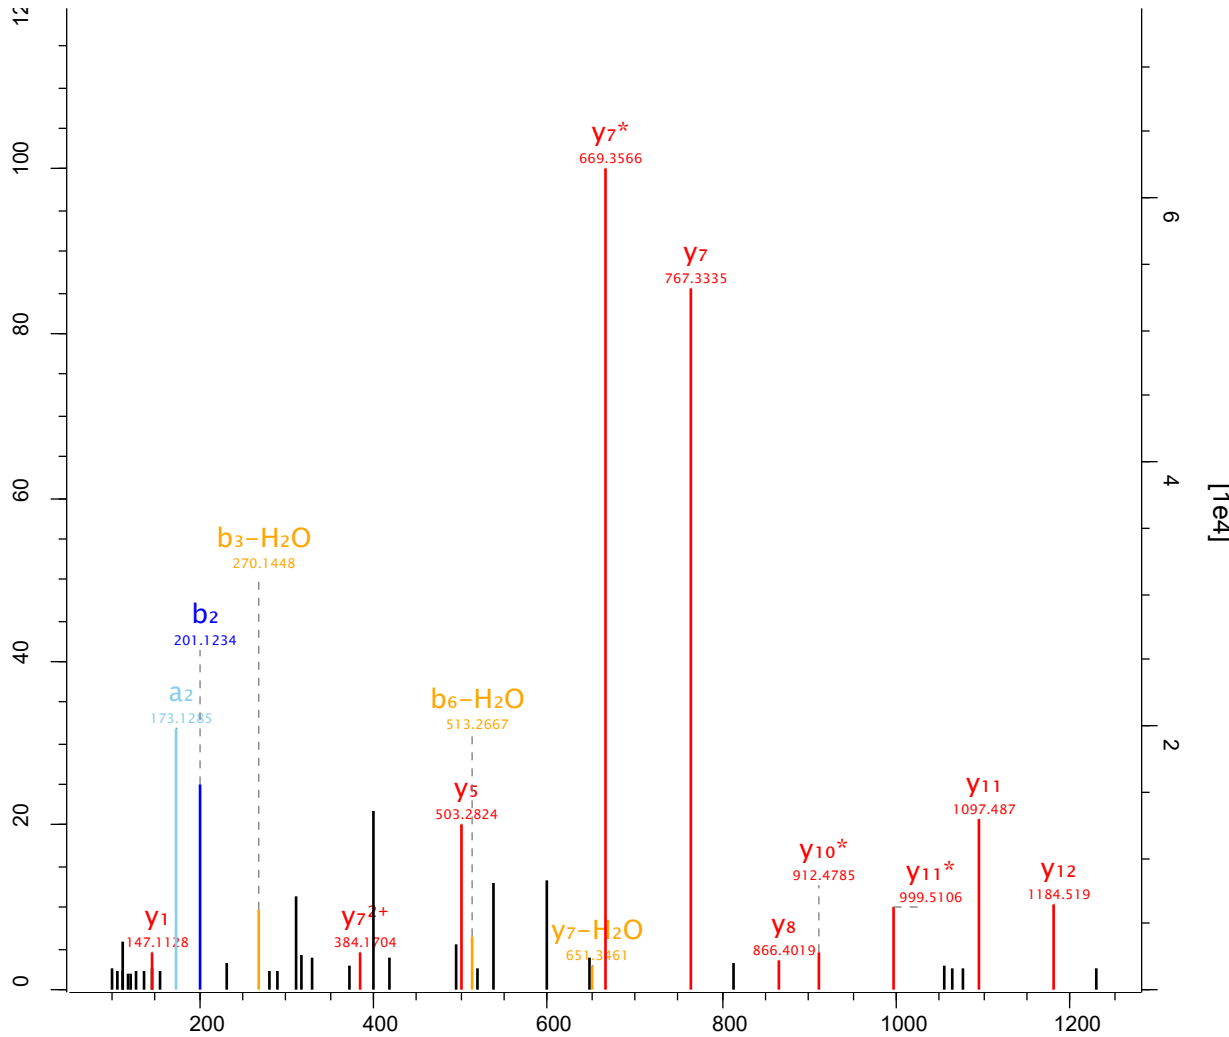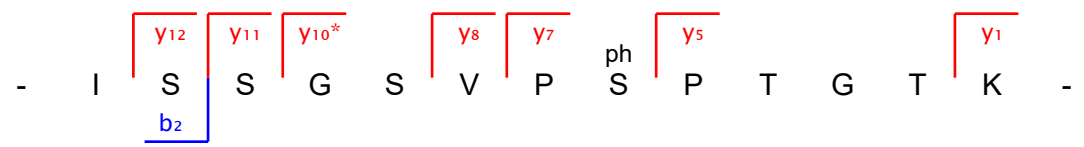

Raw file Scan Method Score m/z  
 sys\_15\_1 8780 FTMS; HCD 103.9 880.86

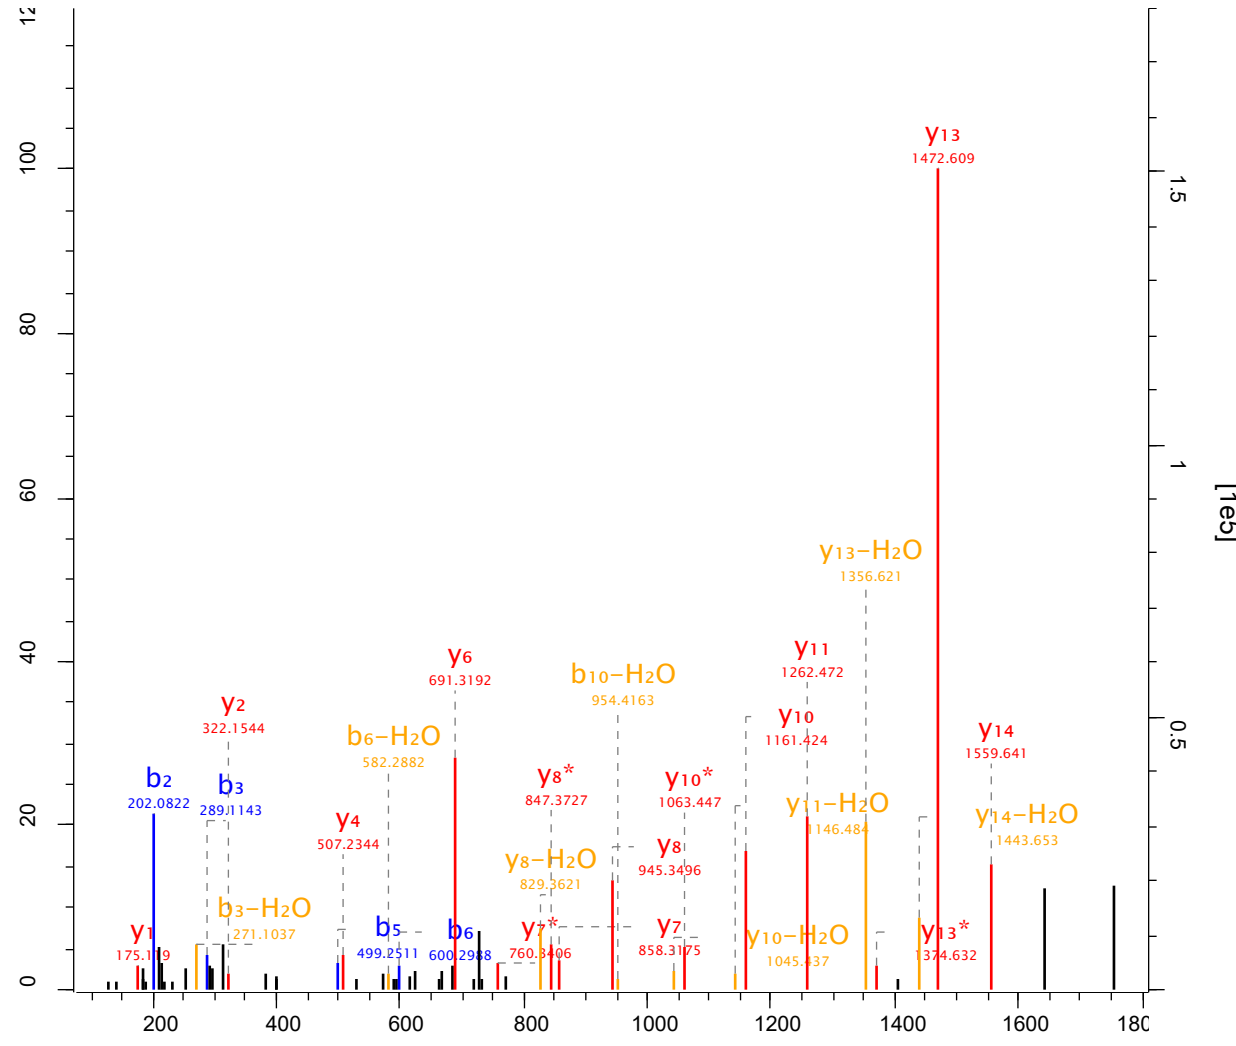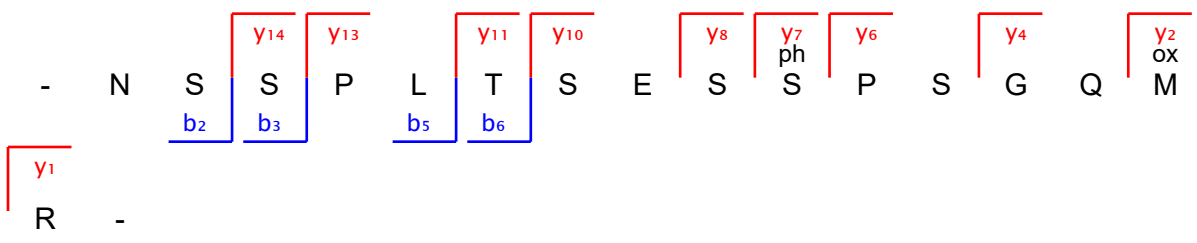

| Raw file | Scan | Method    | Score | m/z    |
|----------|------|-----------|-------|--------|
| sys_15_1 | 8826 | FTMS; HCD | 43.76 | 574.24 |

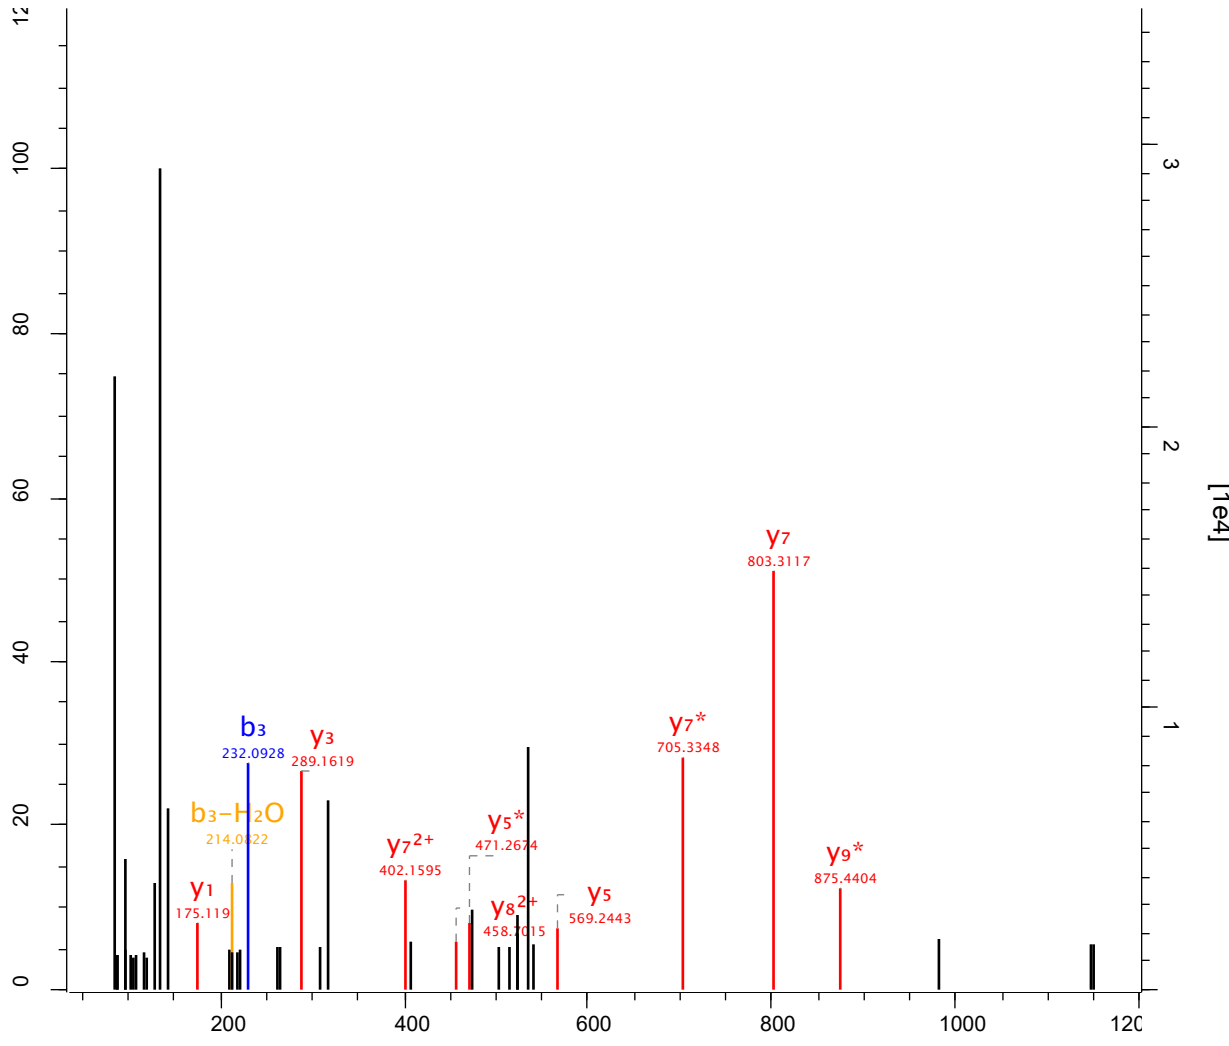

- S S y9\* y8 2+ y7 ox y5  
ph I y3 G G y1 -

b3

Raw file Scan Method Score m/z  
 sys\_15\_1 8840 FTMS; HCD 93.92 638.59

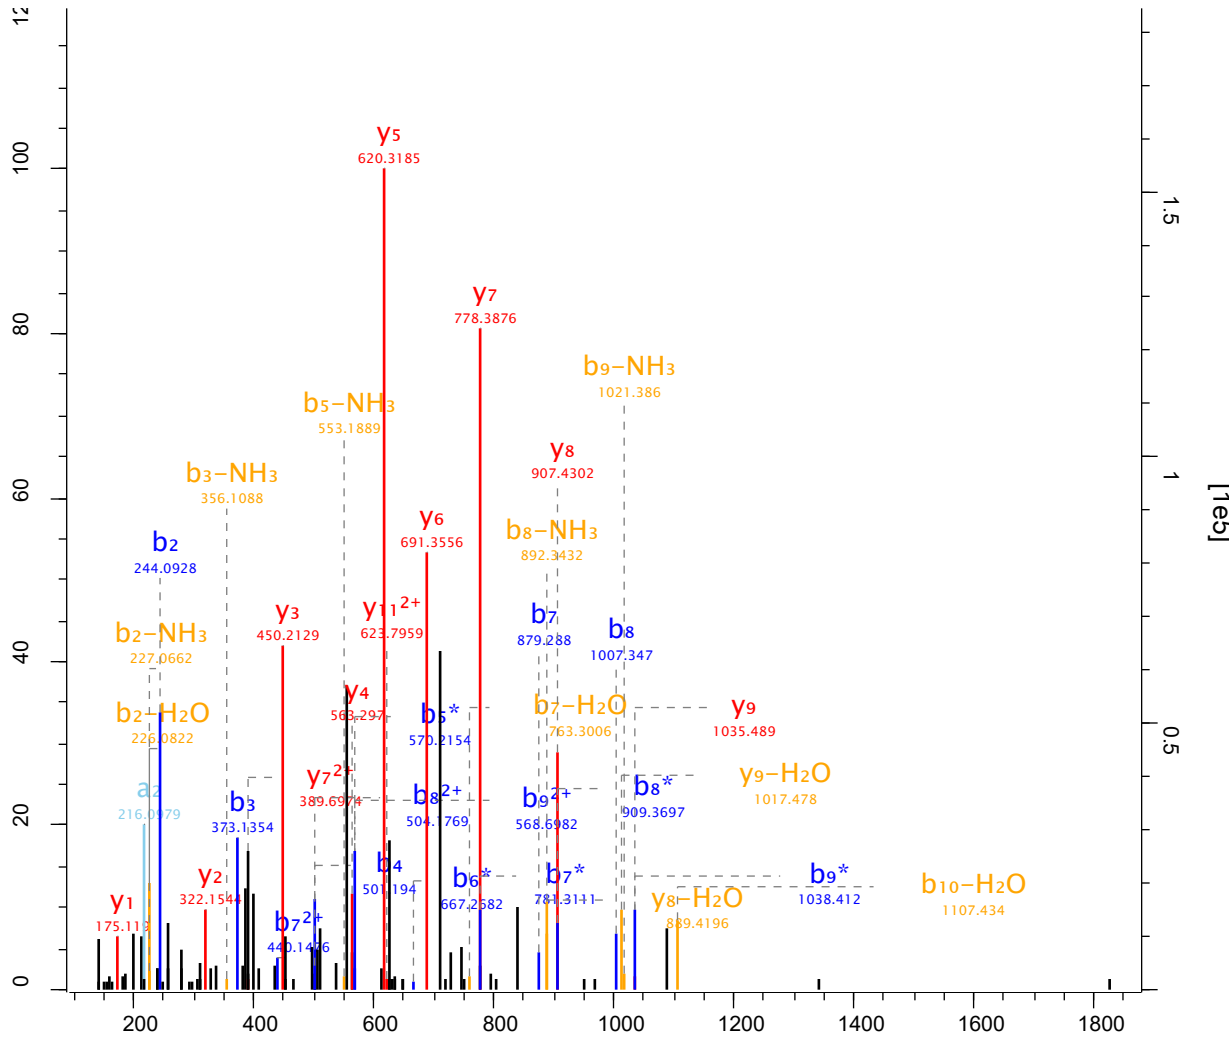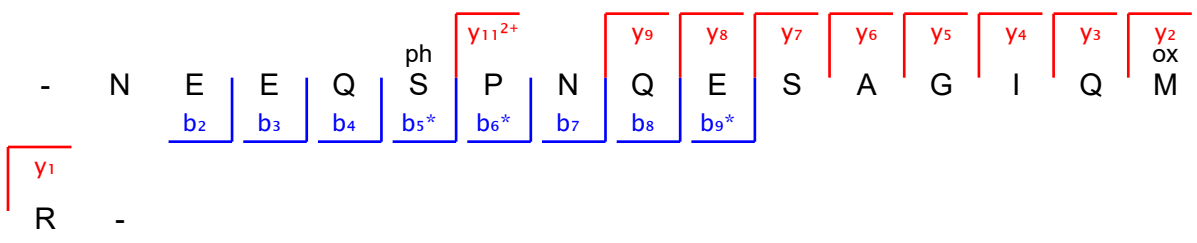

Raw file Scan Method Score m/z  
 sys\_15\_1 8973 FTMS; HCD 61.26 758.82

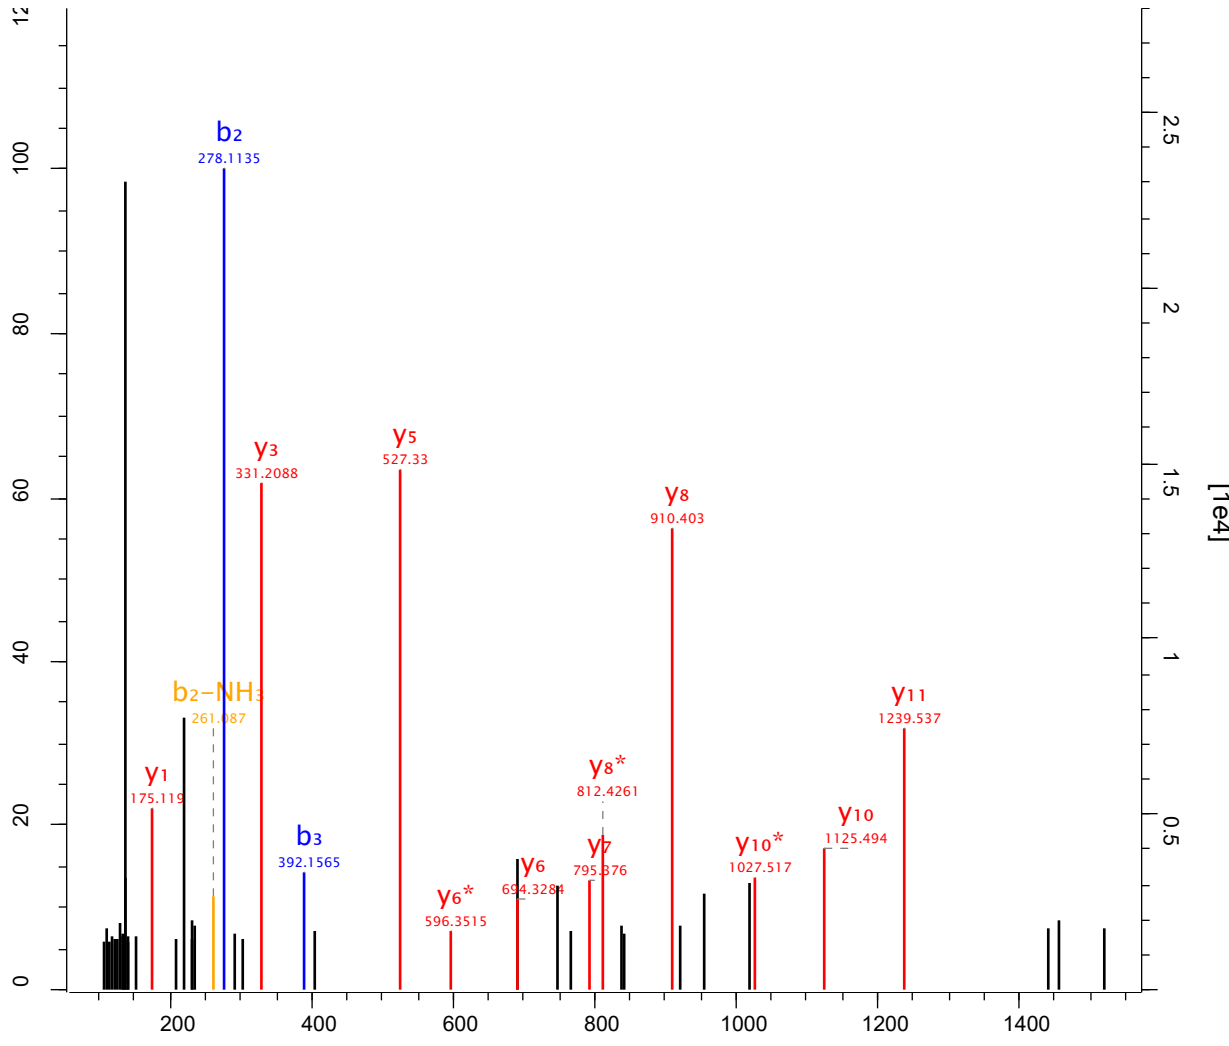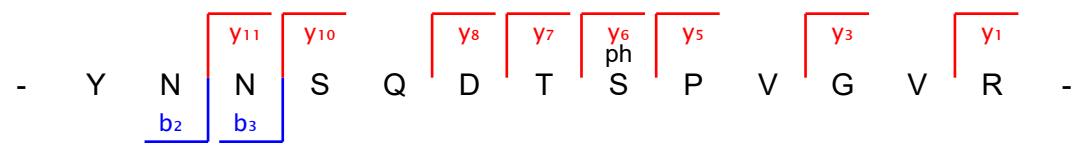

| Raw file | Scan | Method    | Score | m/z    |
|----------|------|-----------|-------|--------|
| sys_15_1 | 9007 | FTMS; HCD | 74.46 | 454.19 |

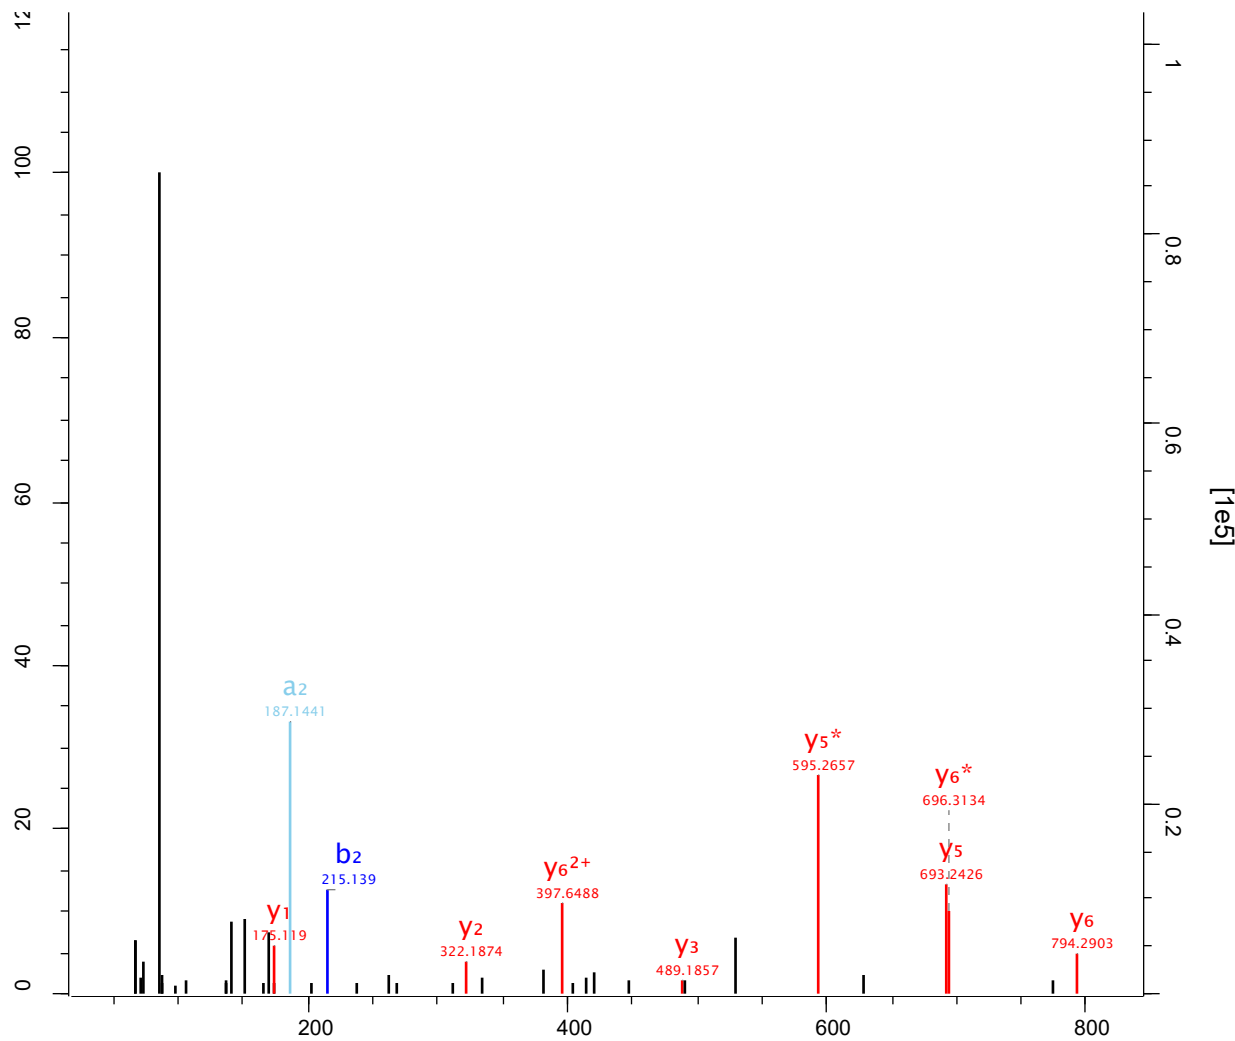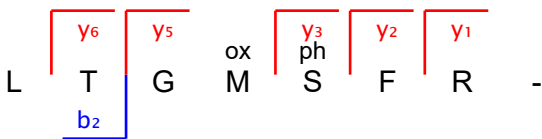

Raw file Scan Method Score m/z  
 sys\_15\_1 9103 FTMS; HCD 81.68 524.23

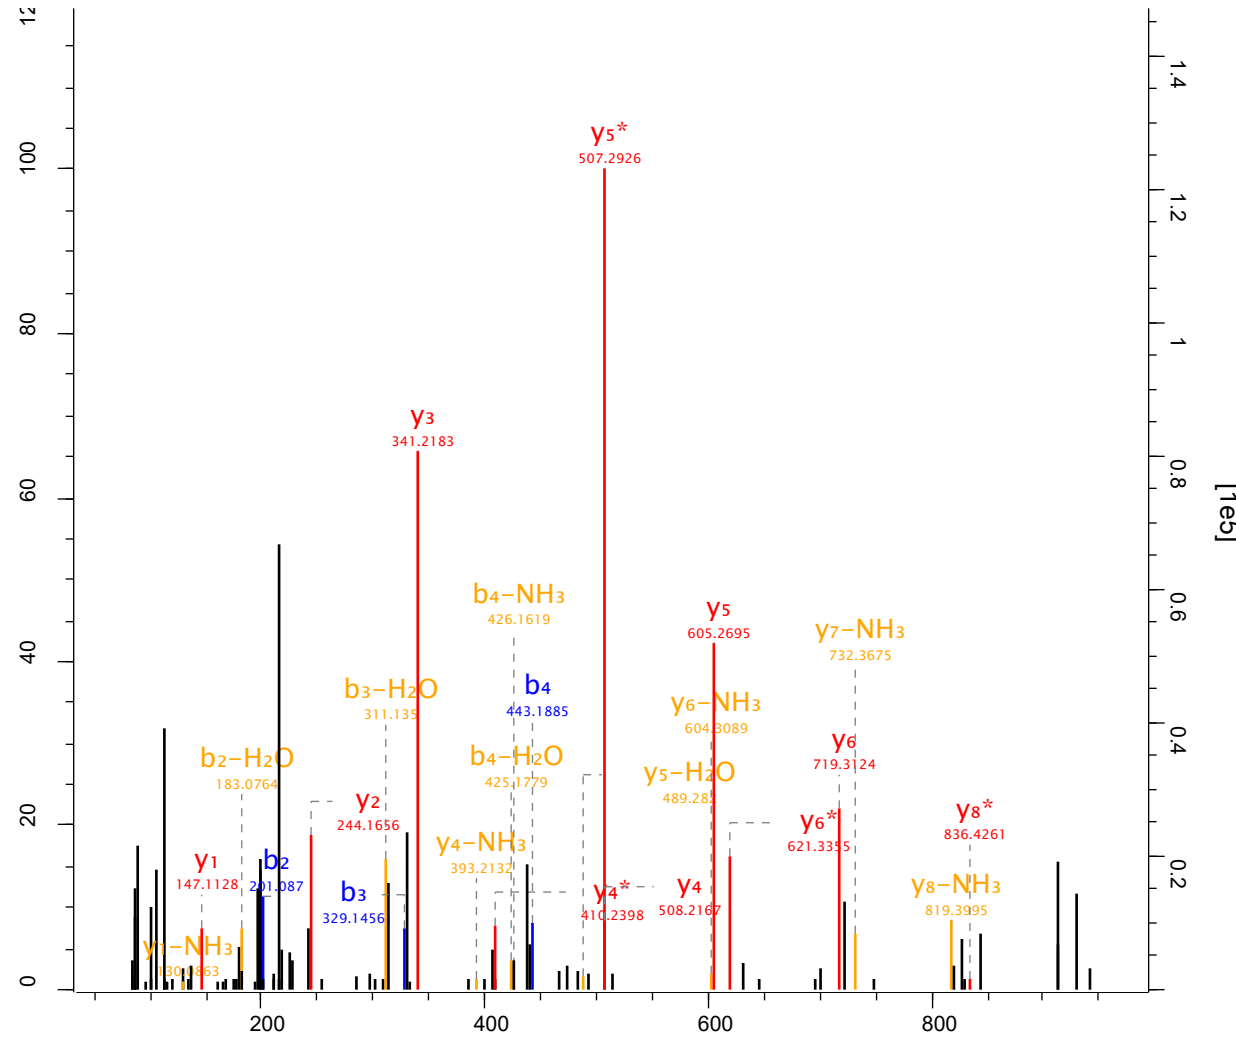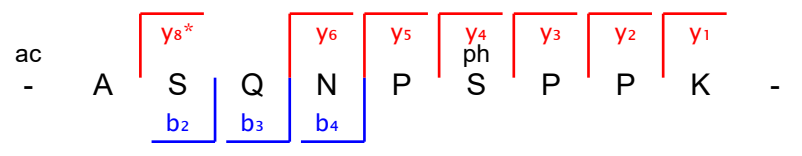

Raw file Scan Method Score m/z  
 sys\_15\_1 9115 FTMS; HCD 197.41 888.84

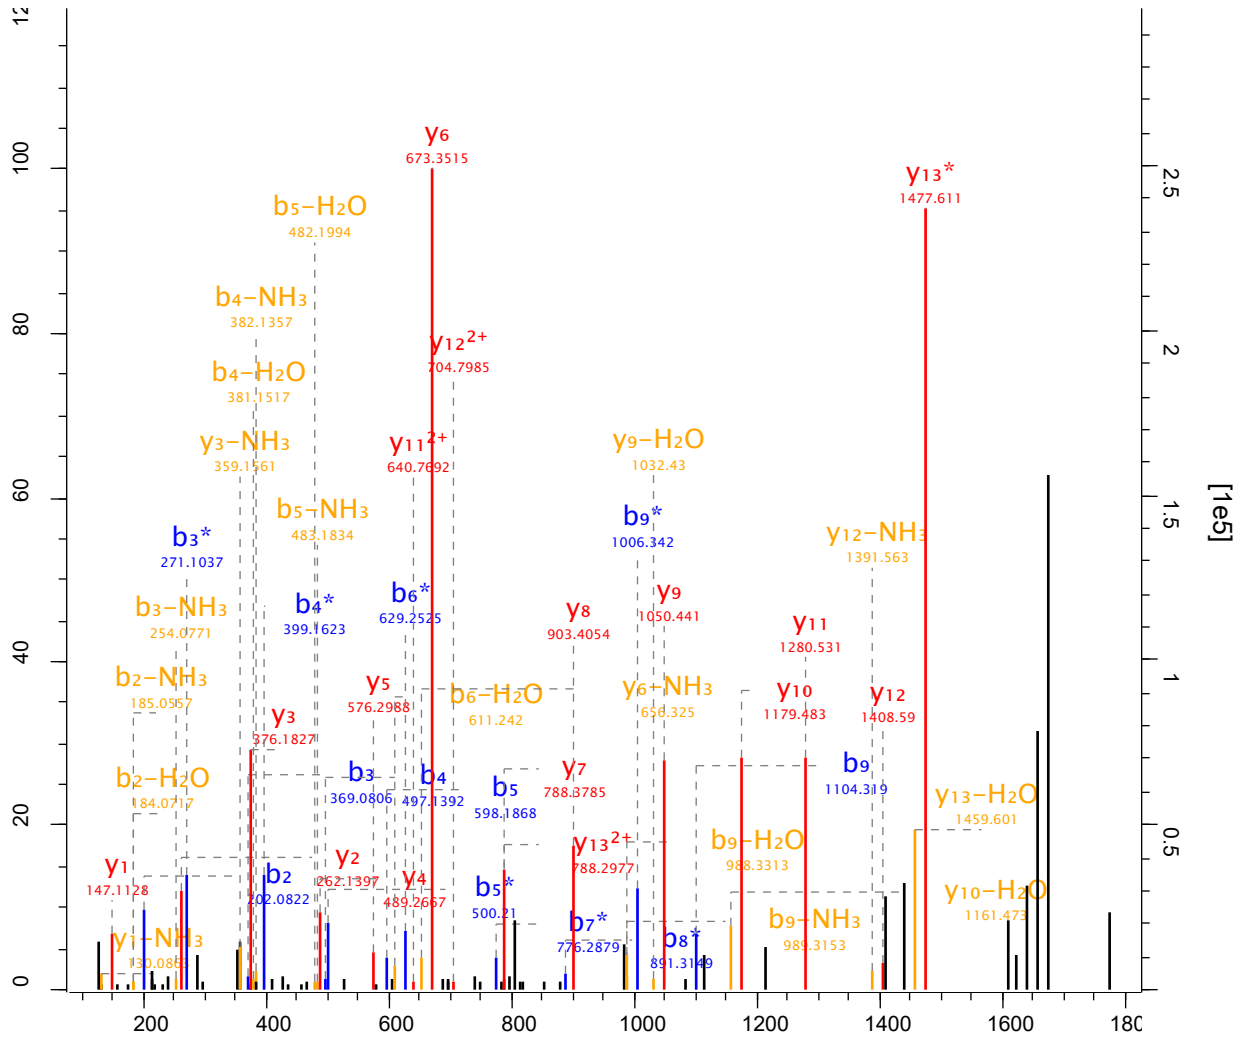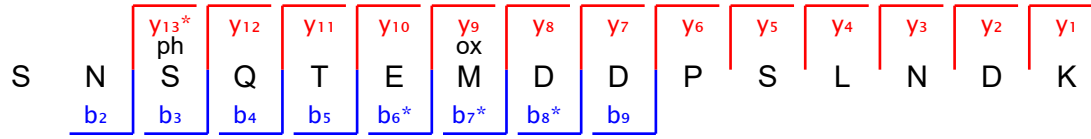



| Raw file | Scan | Method    | Score | m/z    |
|----------|------|-----------|-------|--------|
| sys_15_1 | 9140 | FTMS; HCD | 42.34 | 452.72 |

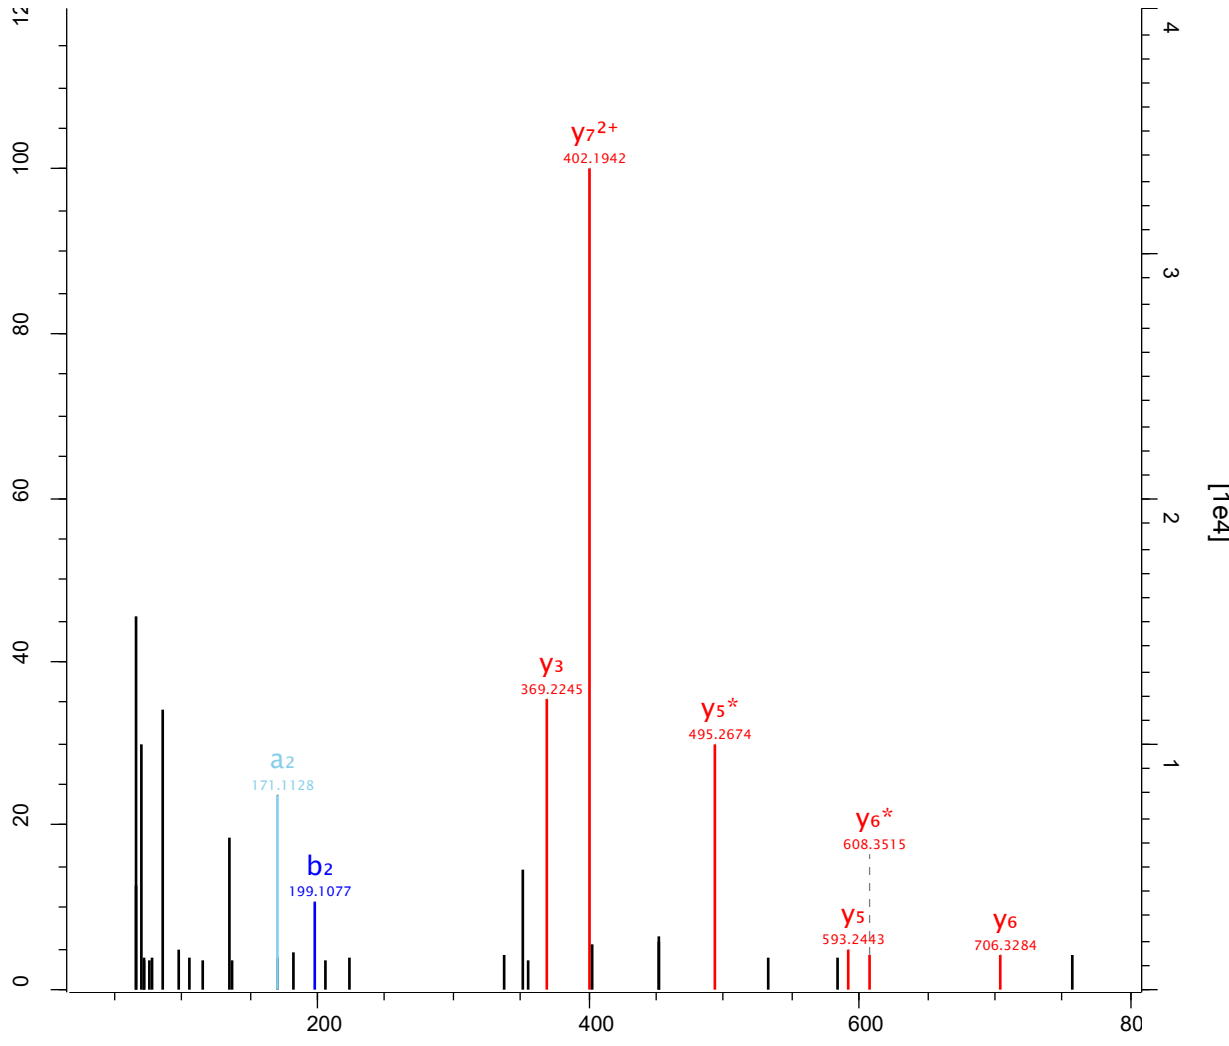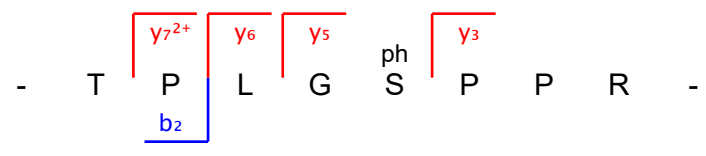

Raw file Scan Method Score m/z  
 sys\_15\_1 9177 FTMS; HCD 174.59 734.78

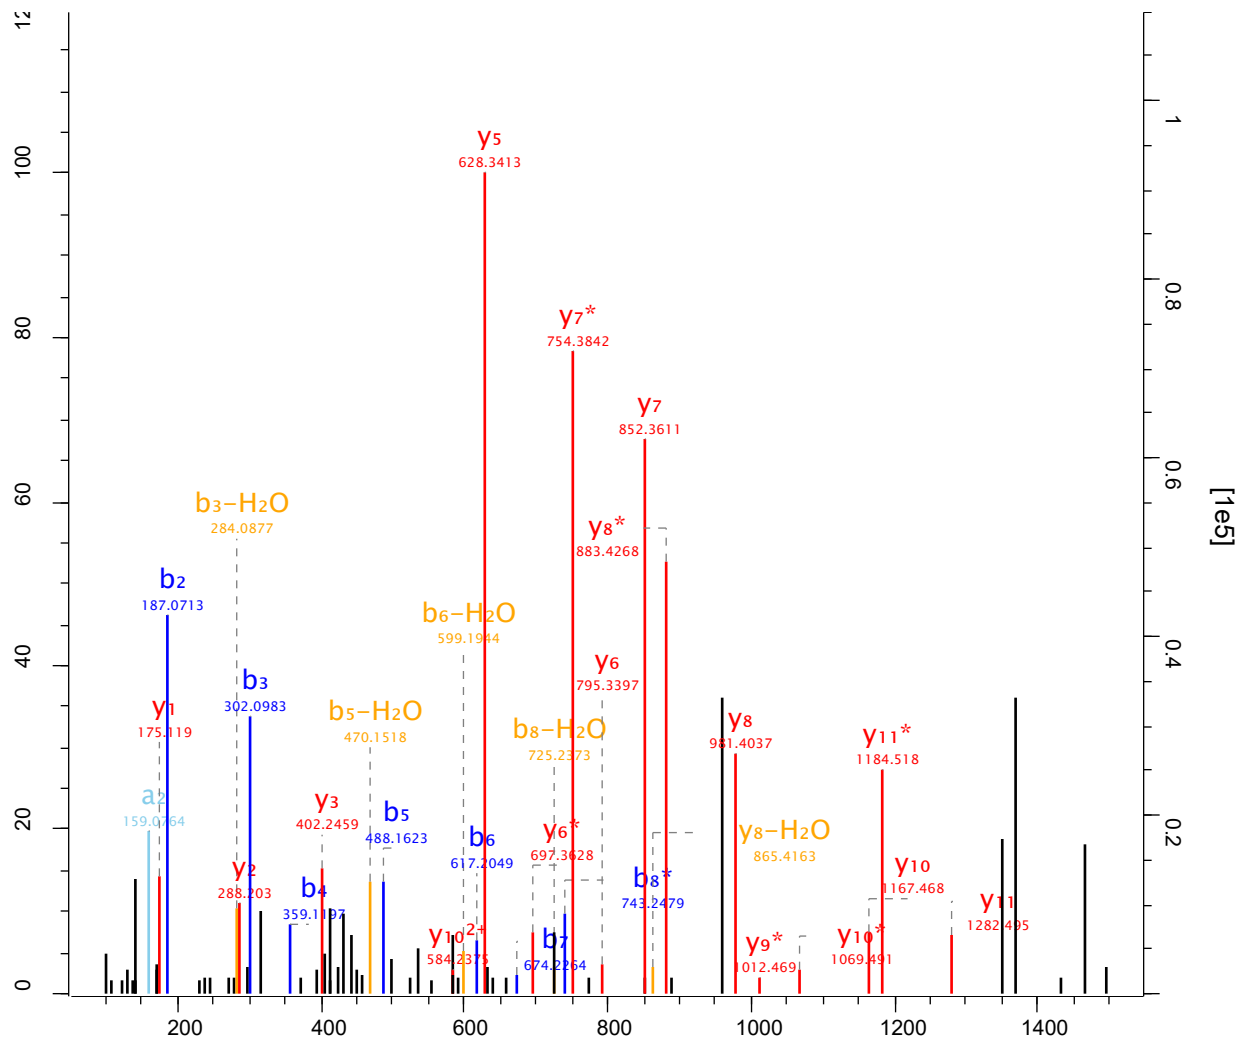

- G E D G E E G S P E N I R -

b<sub>2</sub>
y<sub>11</sub>
y<sub>10</sub>
y<sub>9</sub>\*
y<sub>8</sub>
y<sub>7</sub>
y<sub>6</sub>ph
y<sub>5</sub>
y<sub>3</sub>
y<sub>2</sub>
y<sub>1</sub>

b<sub>3</sub>
b<sub>4</sub>
b<sub>5</sub>
b<sub>6</sub>
b<sub>7</sub>
b<sub>8</sub>\*

Raw file Scan Method Score m/z  
 sys\_15\_1 9212 FTMS; HCD 155.57 663.79

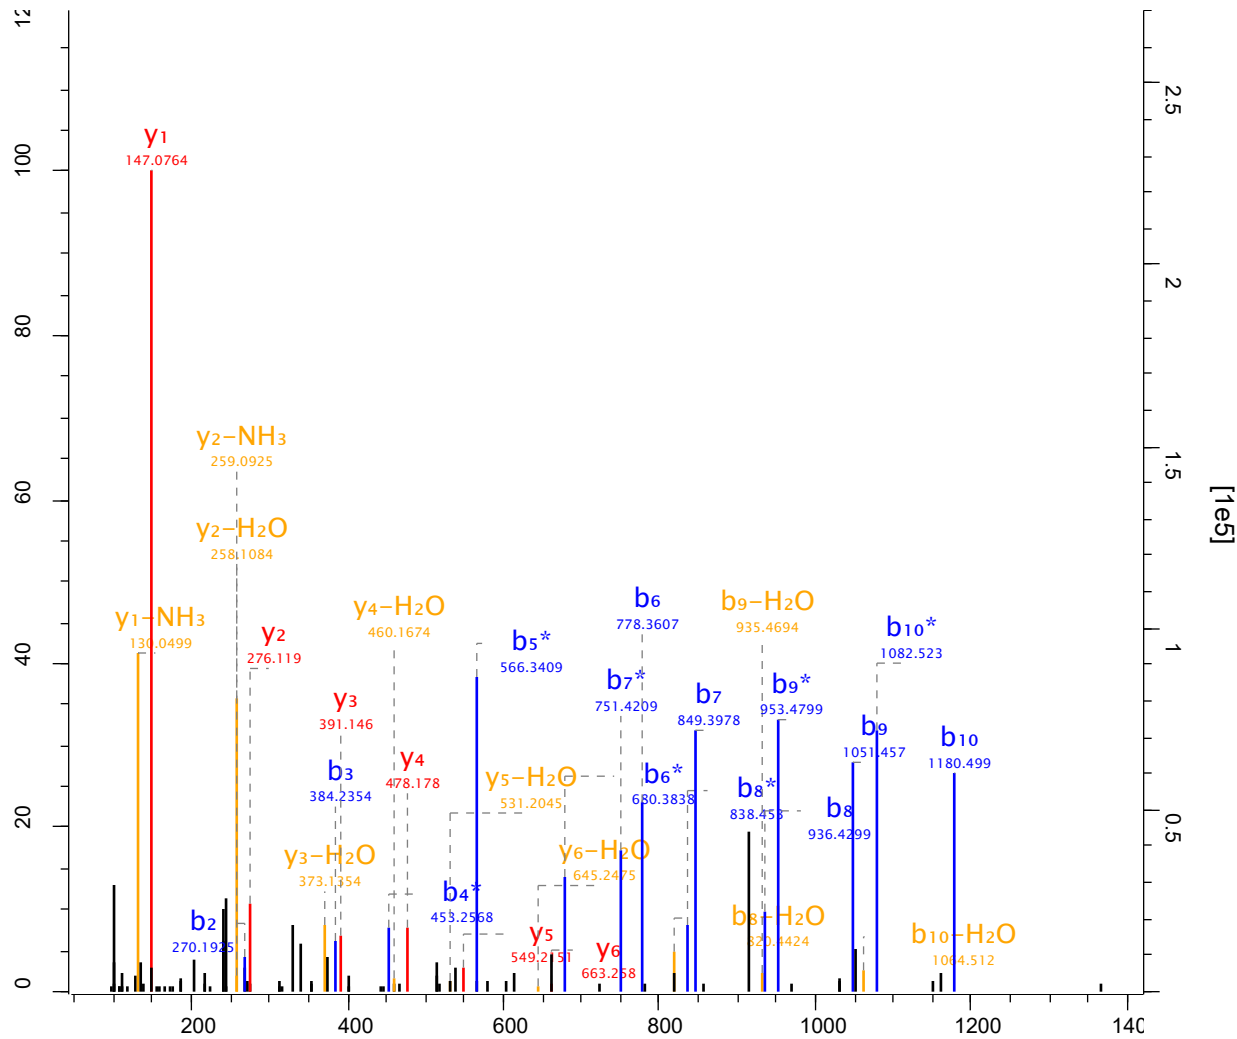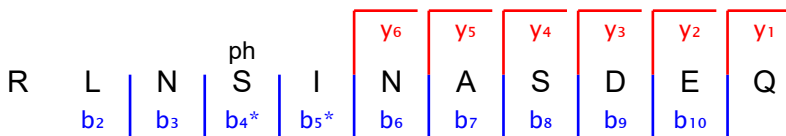

Raw file Scan Method Score m/z  
 sys\_15\_1 9379 FTMS; HCD 160.22 563.23

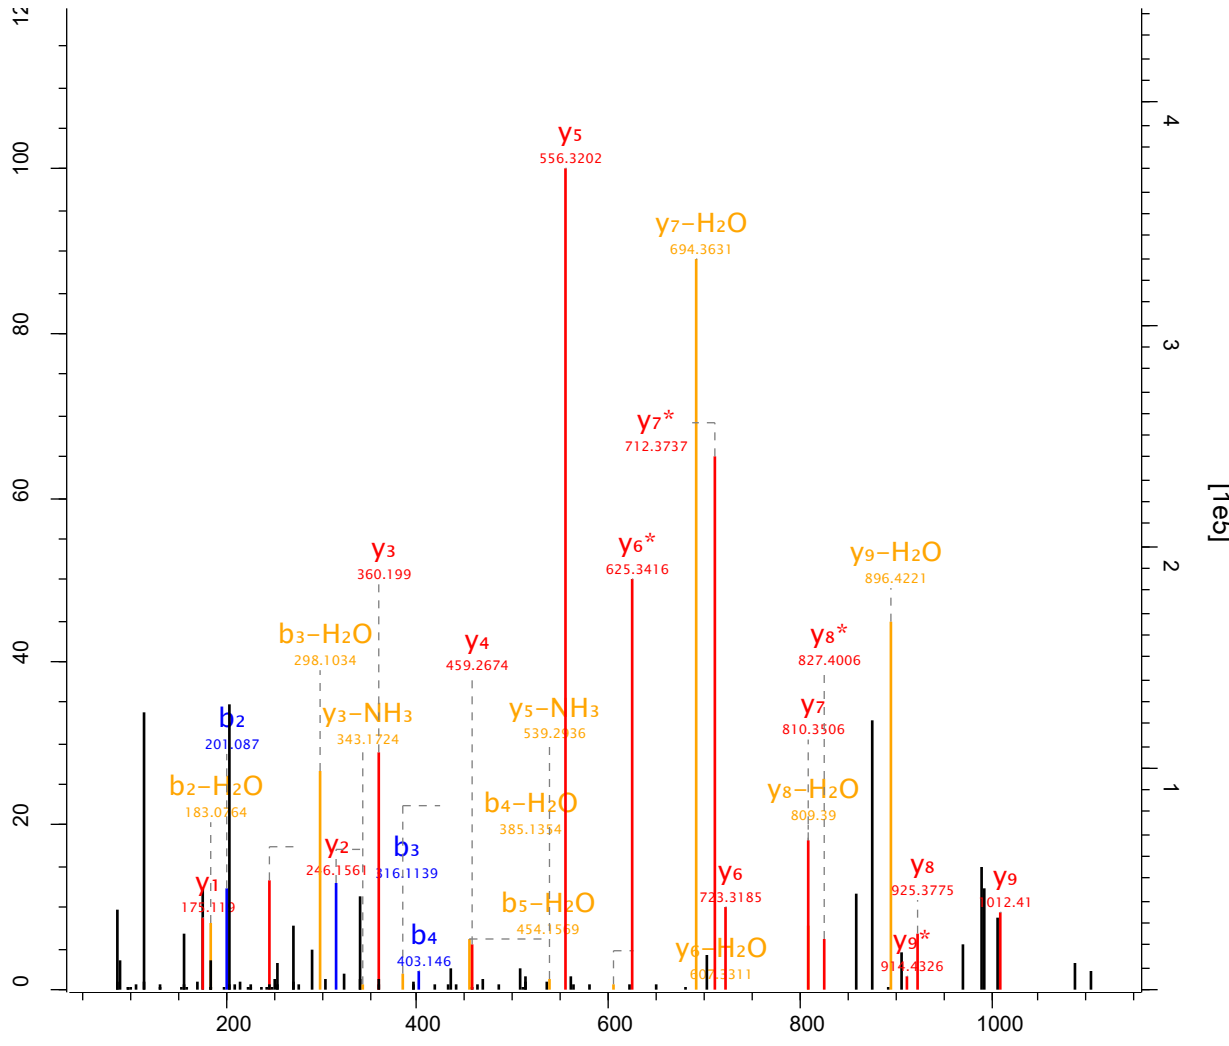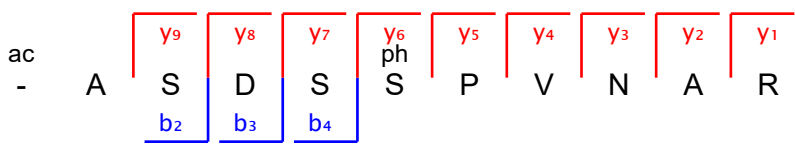

Raw file Scan Method Score m/z  
 sys\_15\_1 9389 FTMS; HCD 148.52 630.77

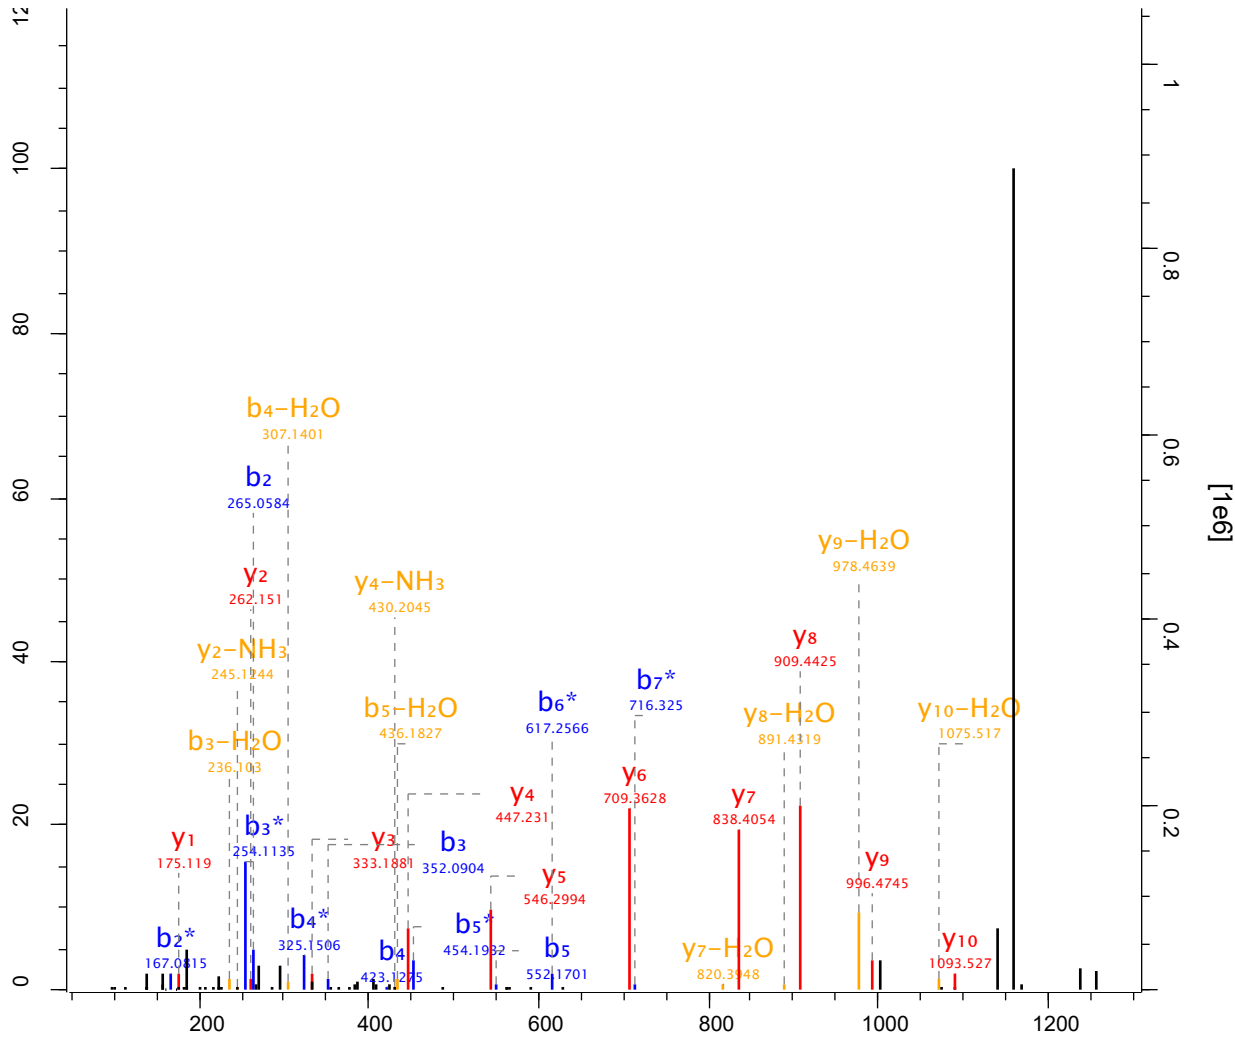

ph S Y<sub>10</sub> Y<sub>9</sub> Y<sub>8</sub> Y<sub>7</sub> Y<sub>6</sub> Y<sub>5</sub> Y<sub>4</sub> Y<sub>3</sub> Y<sub>2</sub> Y<sub>1</sub> -

- b<sub>2</sub> b<sub>3</sub> b<sub>4</sub> b<sub>5</sub> b<sub>6</sub>\* b<sub>7</sub>\* N A S R -

Raw file Scan Method Score m/z  
 sys\_15\_1 9410 FTMS; HCD 125.97 733.24

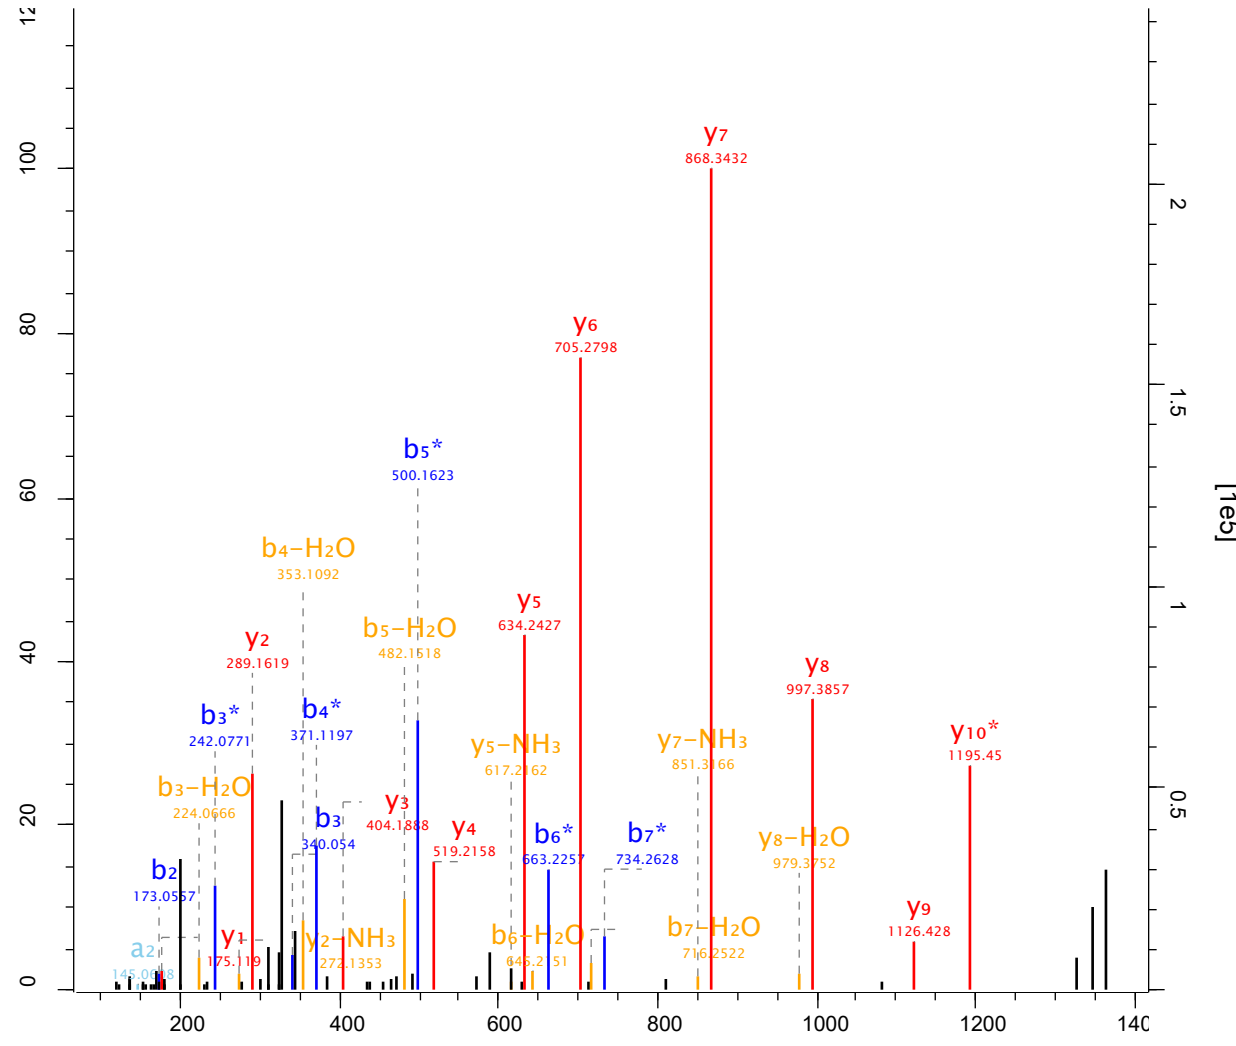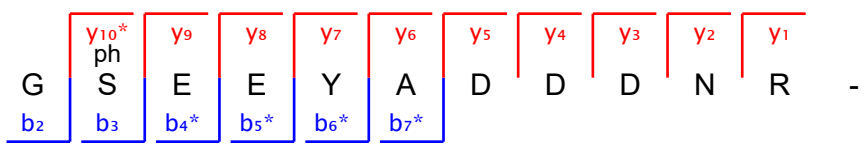

Raw file Scan Method Score m/z  
 sys\_15\_1 9413 FTMS; HCD 121.82 652.77

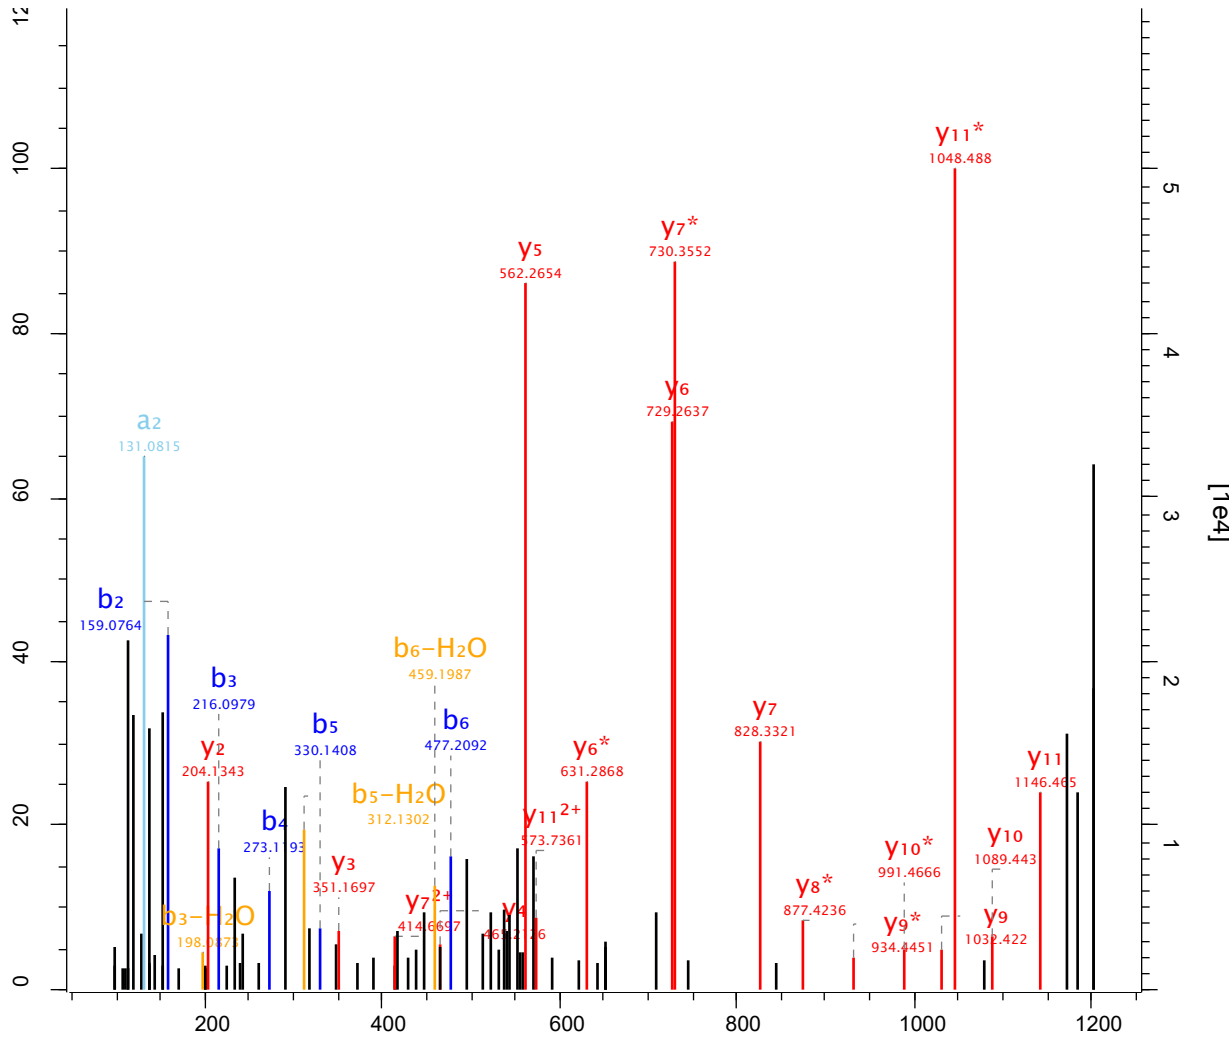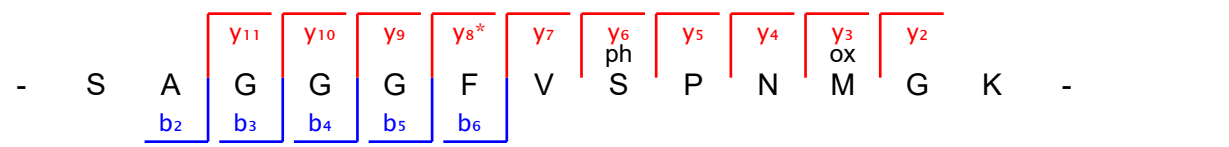

Raw file Scan Method Score m/z  
 sys\_15\_1 9477 FTMS; HCD 174.18 777.79

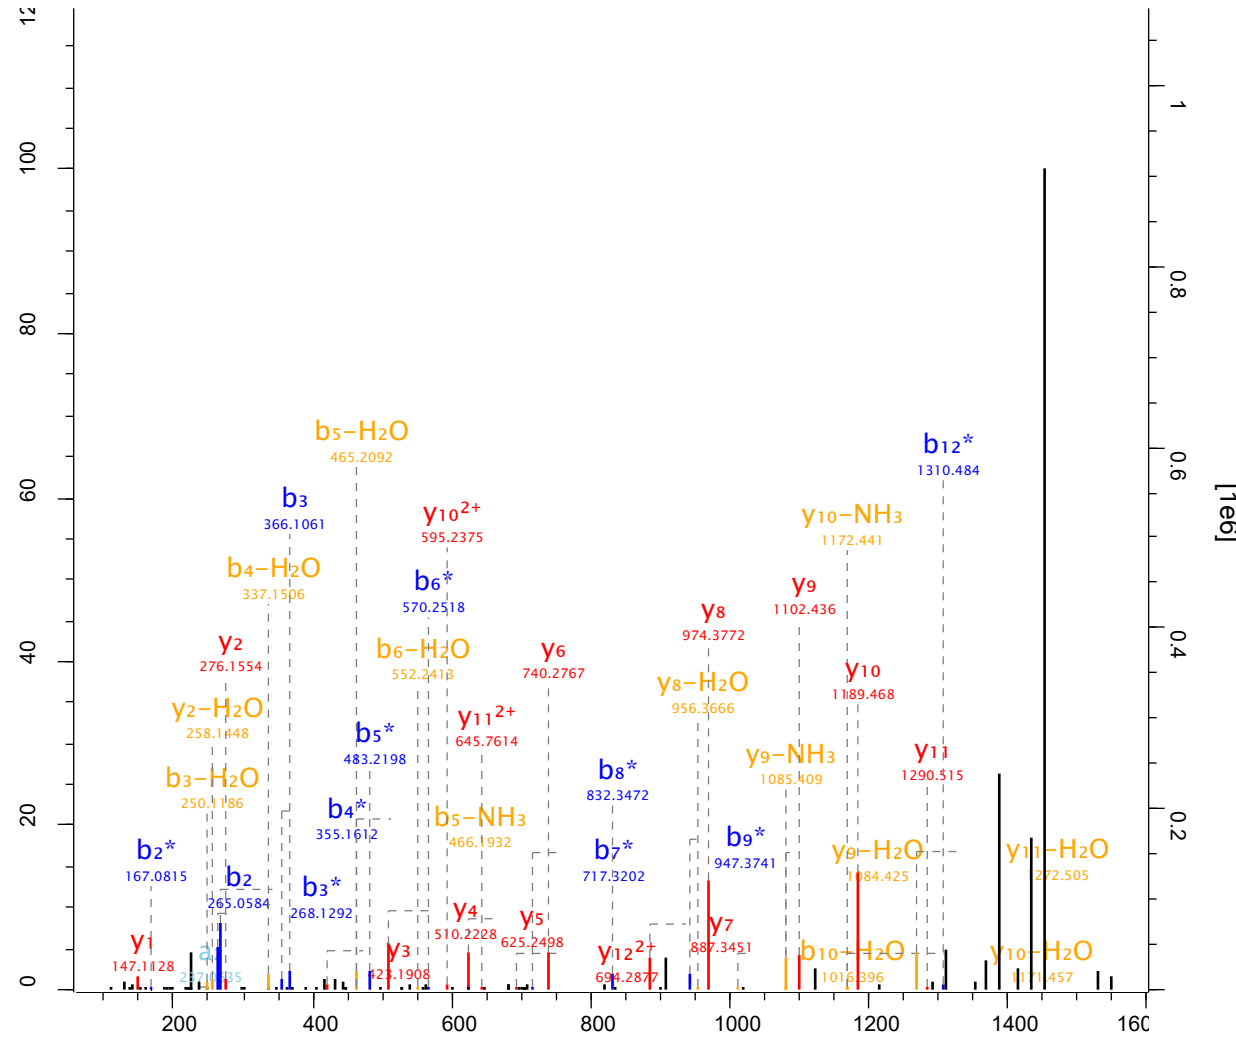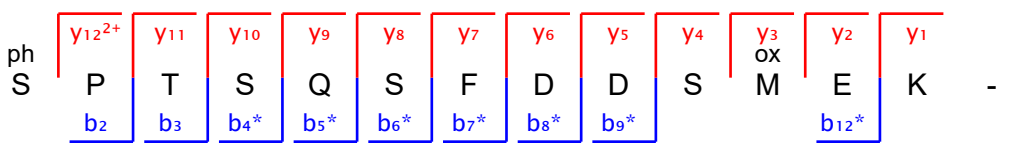



Raw file Scan Method Score m/z  
 sys\_15\_1 9494 FTMS; HCD 253.73 763.85

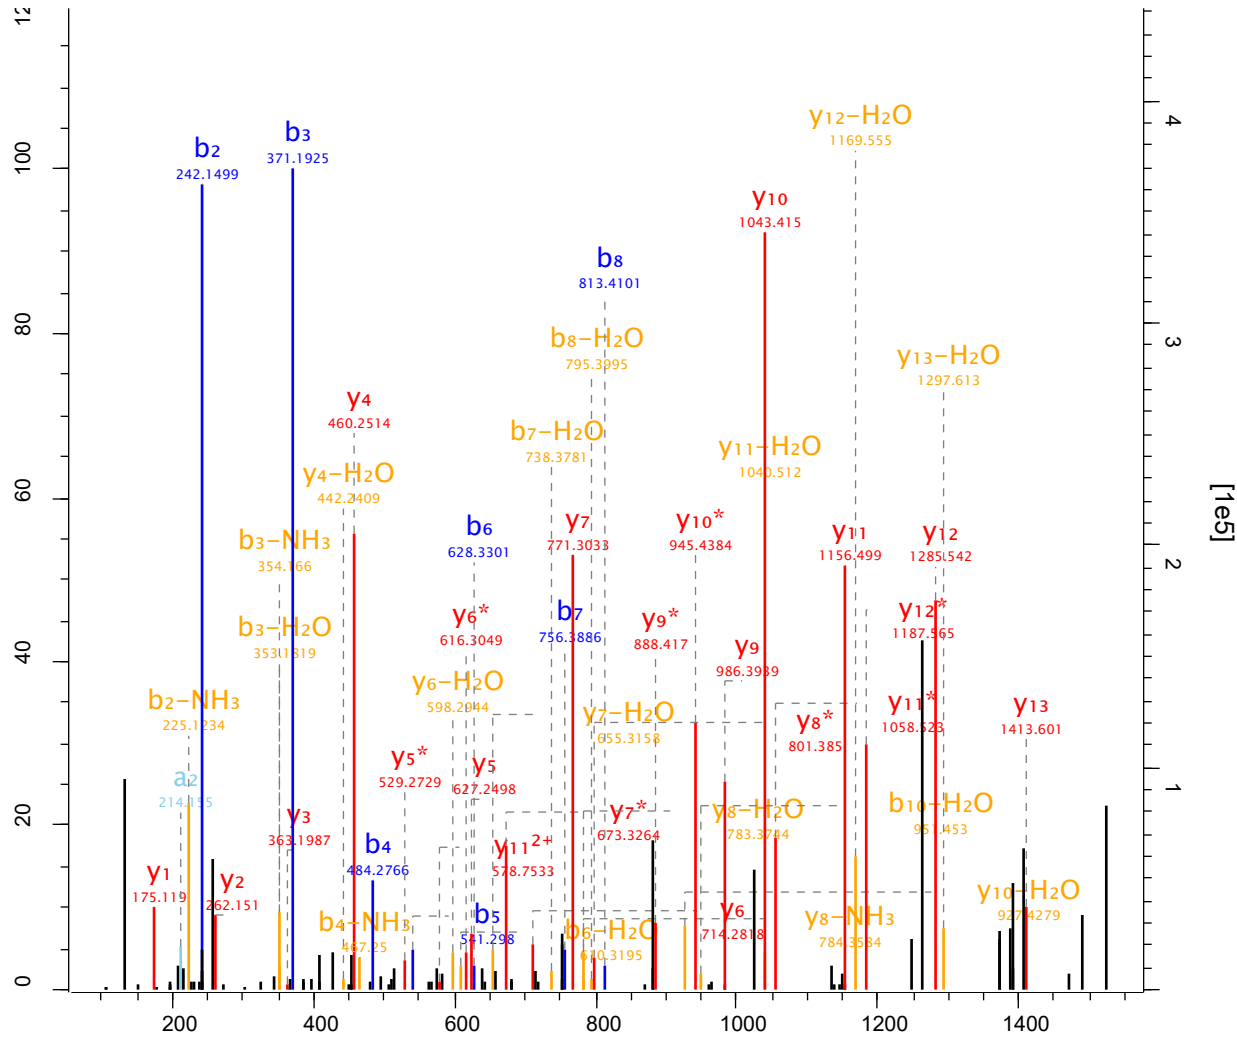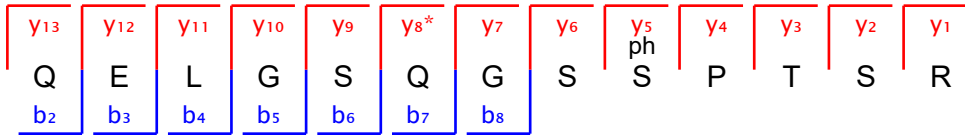

Raw file Scan Method Score m/z  
 sys\_15\_1 9500 FTMS; HCD 81.63 602.78

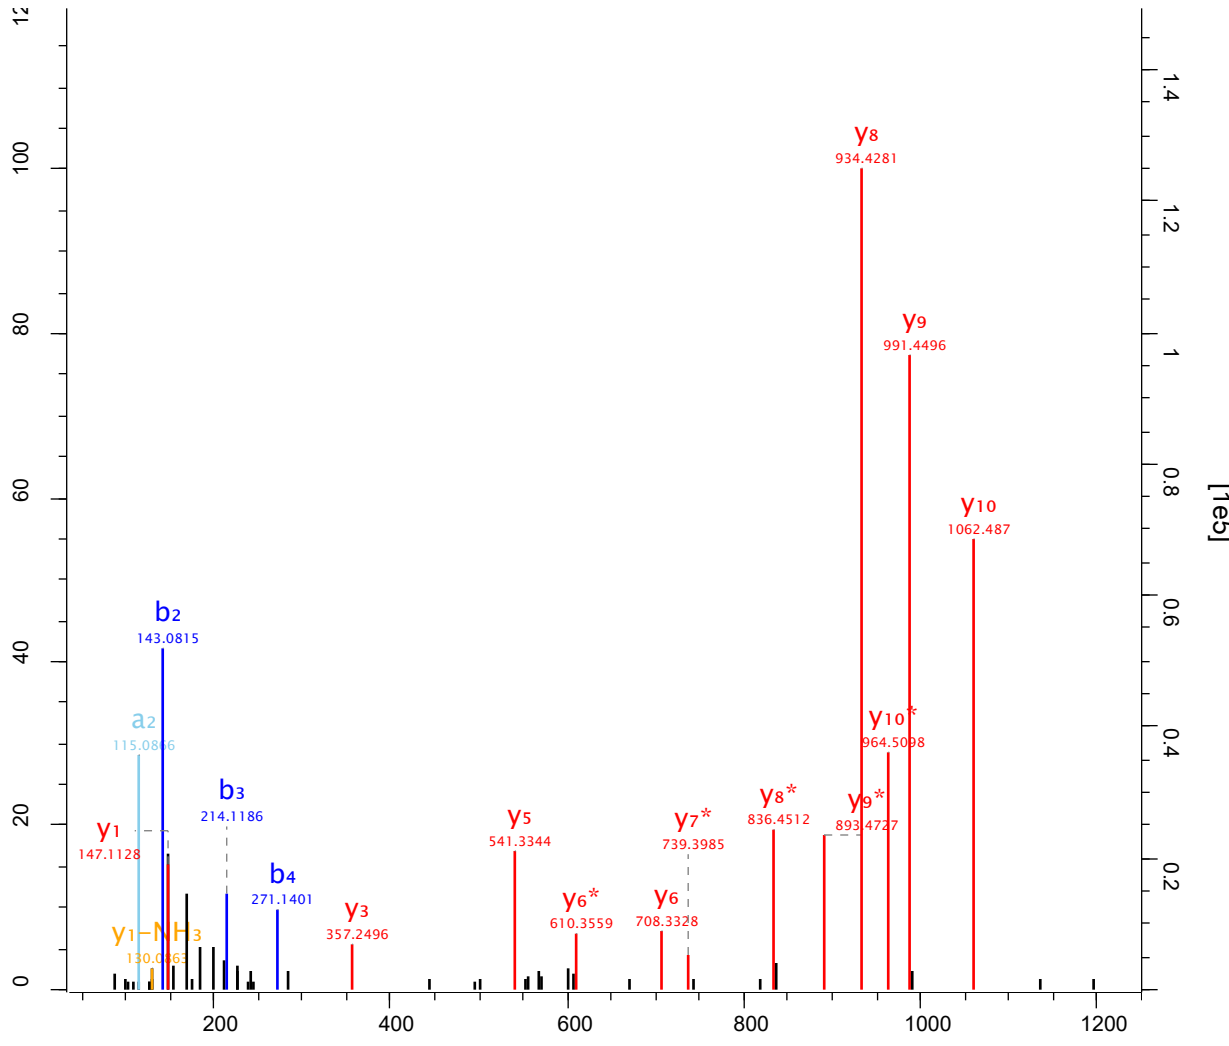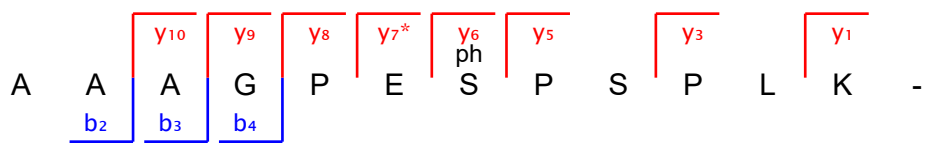

Raw file Scan Method Score m/z  
 sys\_15\_1 9506 FTMS; HCD 60.94 818.3

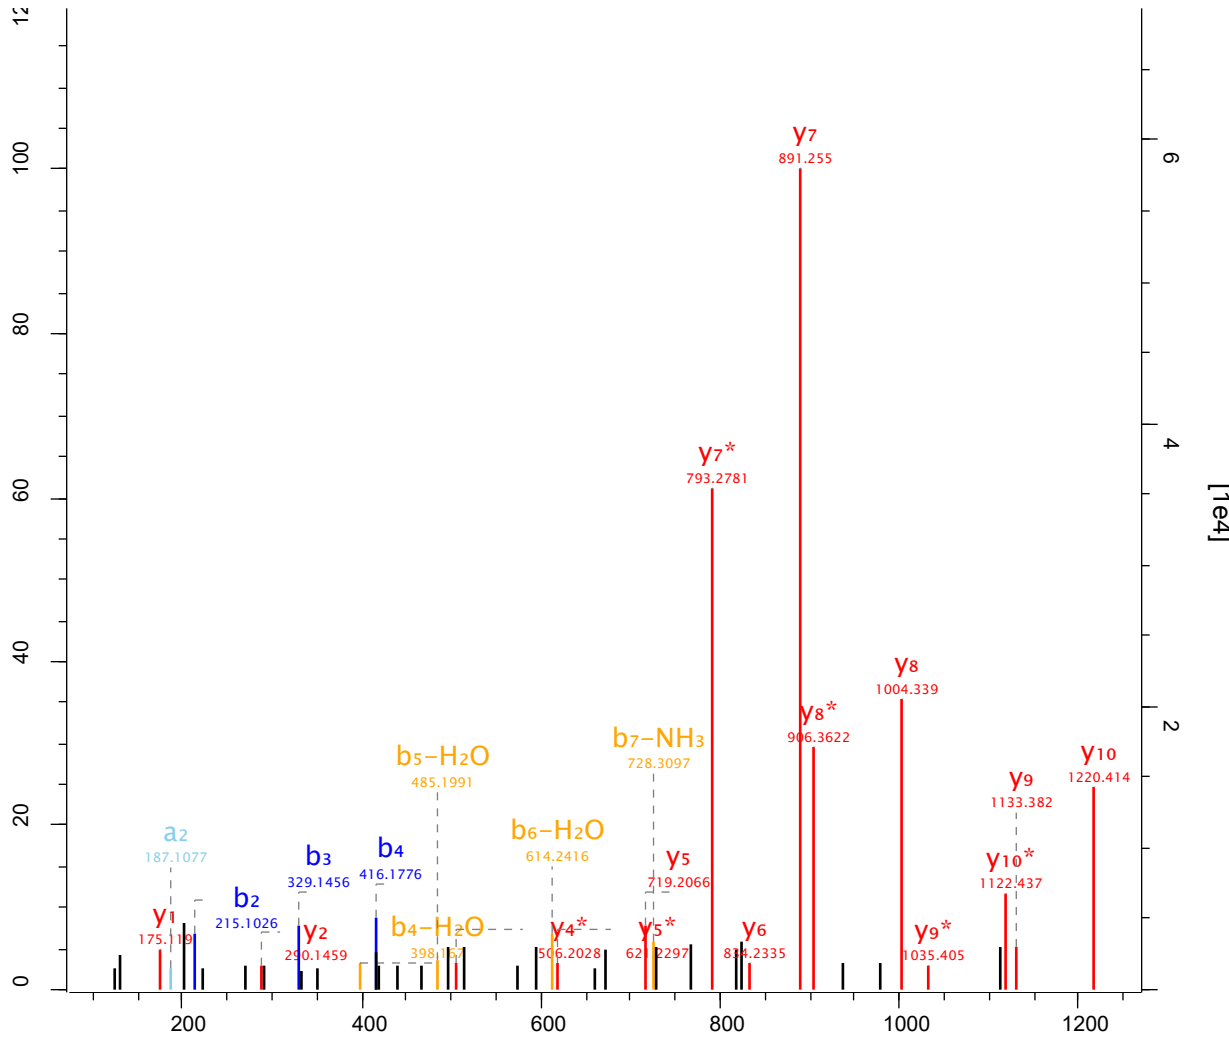

- V D N S S E I G D D M ph S D R -  
 b2 b3 b4 y10 y9 y8 y7 y6 y5 y4\* ox y2 y1

Raw file Scan Method Score m/z  
 sys\_15\_1 9541 FTMS; HCD 66.25 695.3

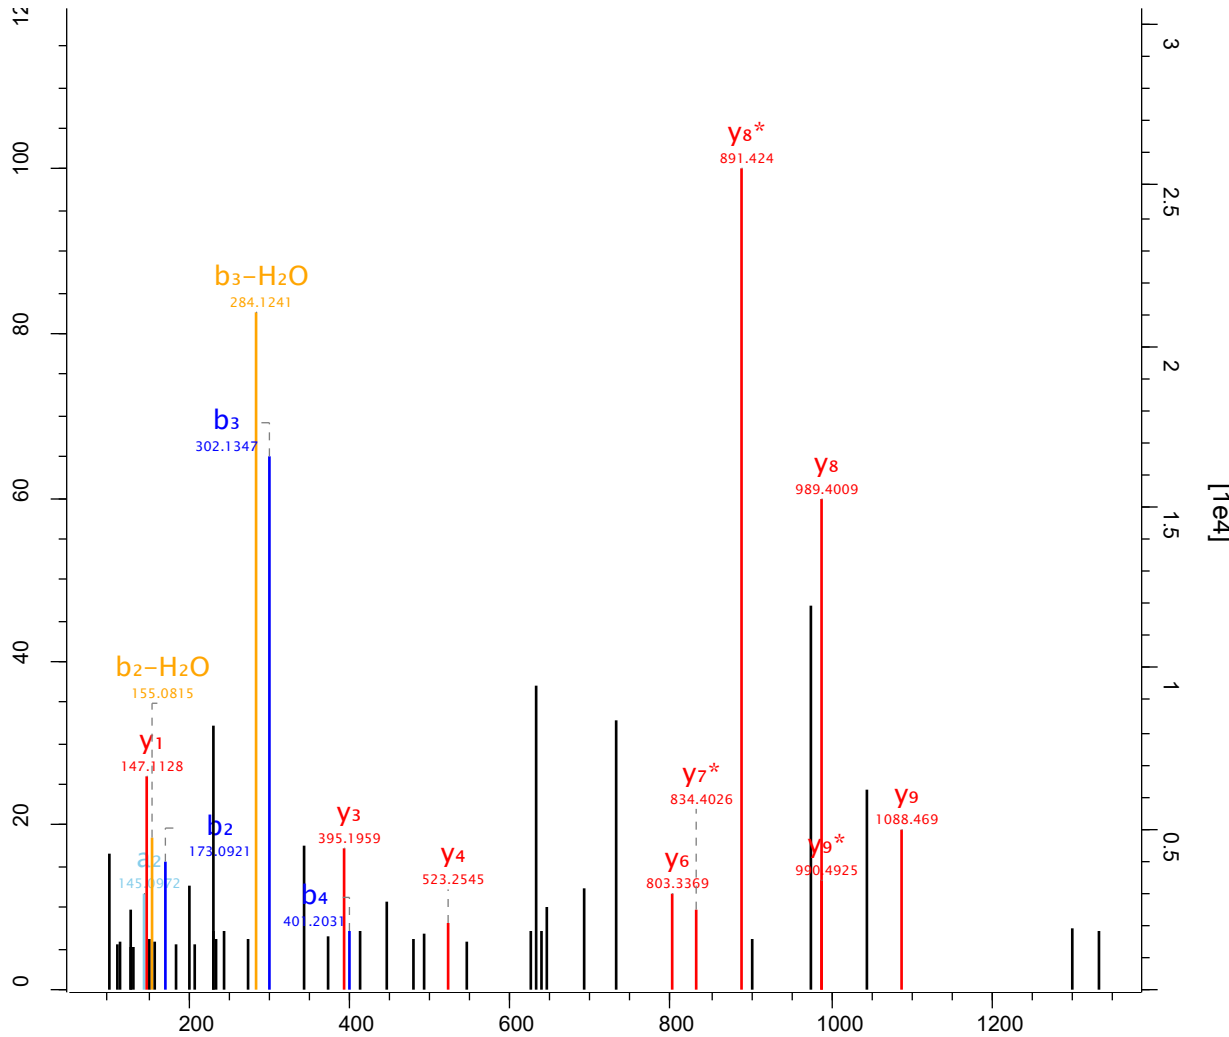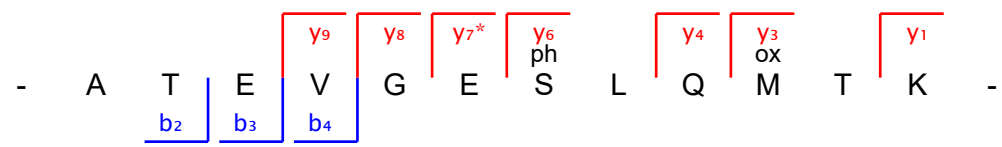

Raw file Scan Method Score m/z  
 sys\_15\_1 9560 FTMS; HCD 94.2 716.31

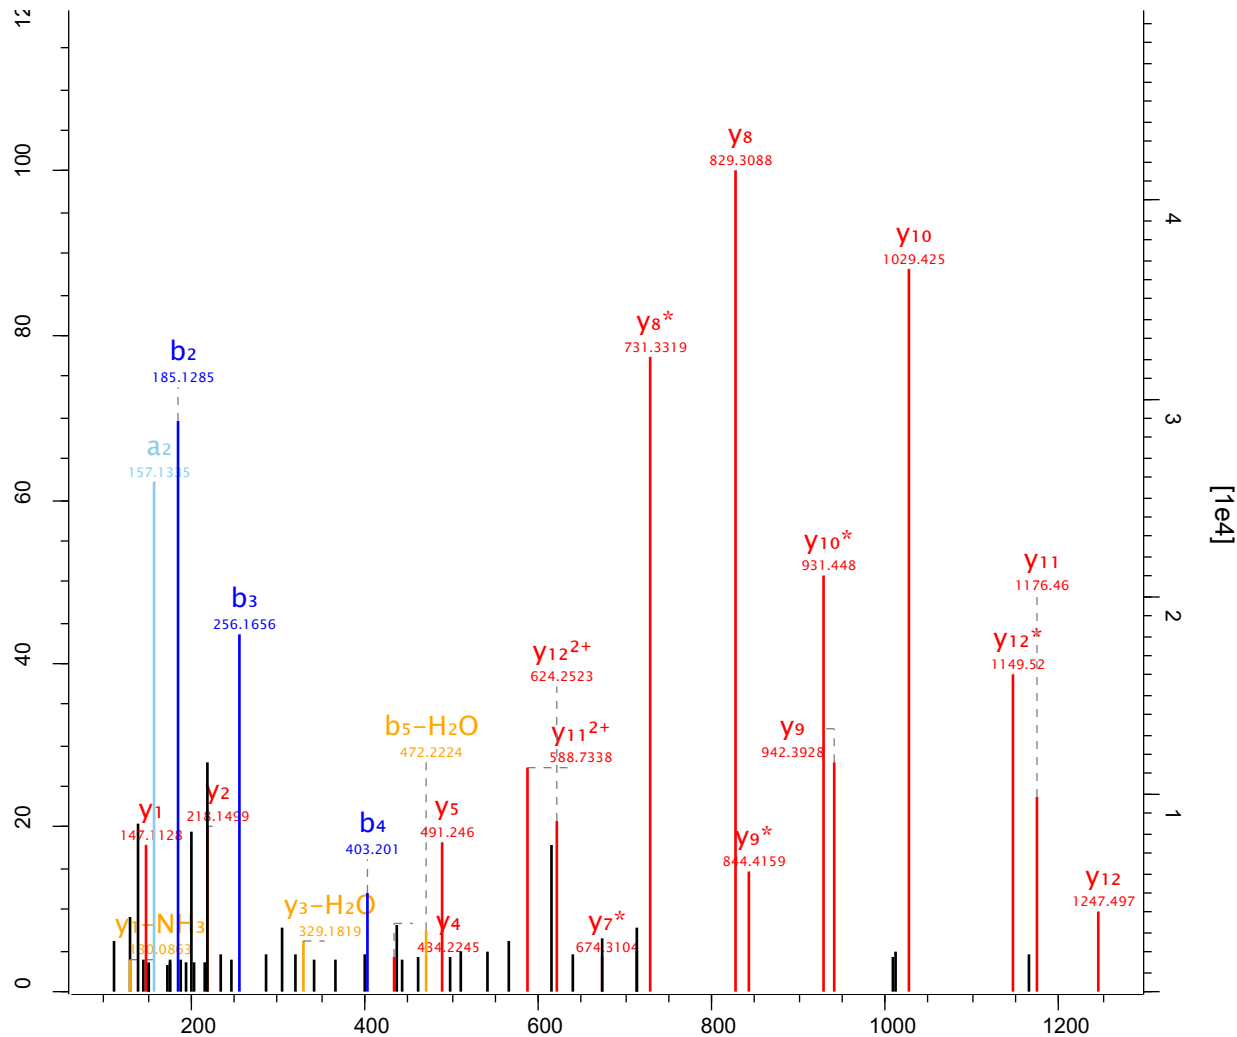

- A L A M S L G N ph S G S E A K -

Fragmentation mapping (b and y ions):

- b<sub>2</sub> (L)
- b<sub>3</sub> (LA)
- b<sub>4</sub> (LAM)
- y<sub>12</sub> (AK)
- y<sub>11</sub> (M)
- y<sub>10</sub> (S)
- y<sub>9</sub> (L)
- y<sub>8</sub> (G)
- y<sub>7</sub>\* (N)
- y<sub>5</sub> (SG)
- y<sub>4</sub> (GS)
- y<sub>2</sub> (EA)
- y<sub>1</sub> (AK)

Raw file Scan Method Score m/z  
 sys\_15\_1 9581 FTMS; HCD 222.54 692.94

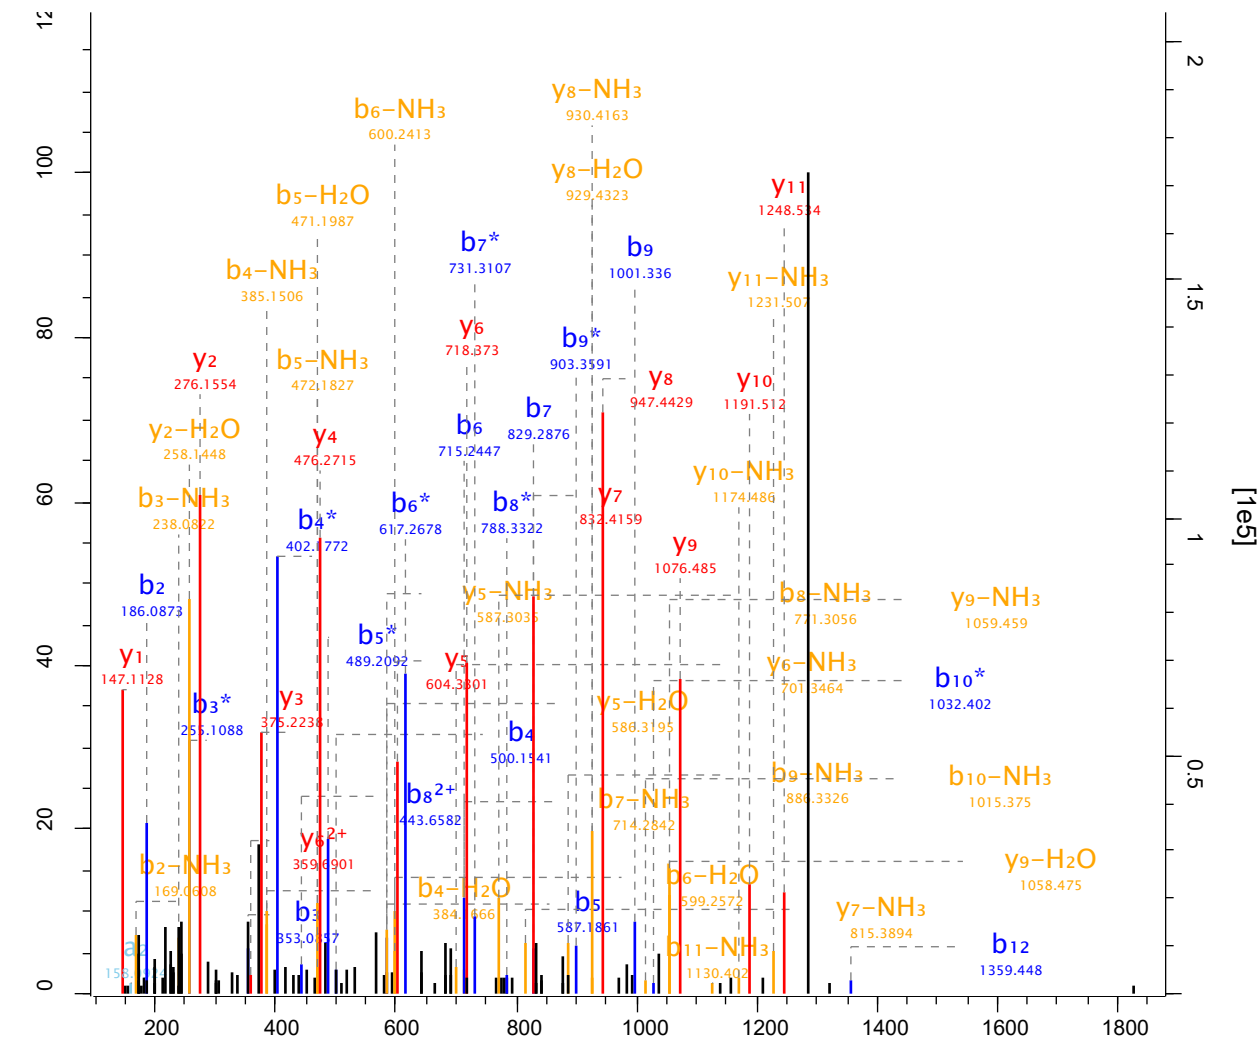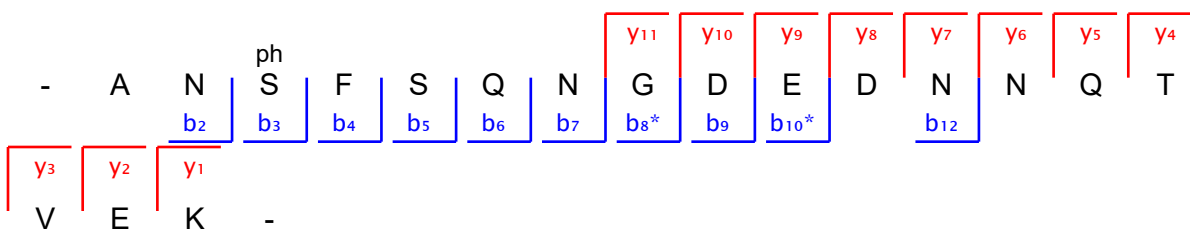

Raw file Scan Method Score m/z  
 sys\_15\_1 9626 FTMS; HCD 248.23 824.83

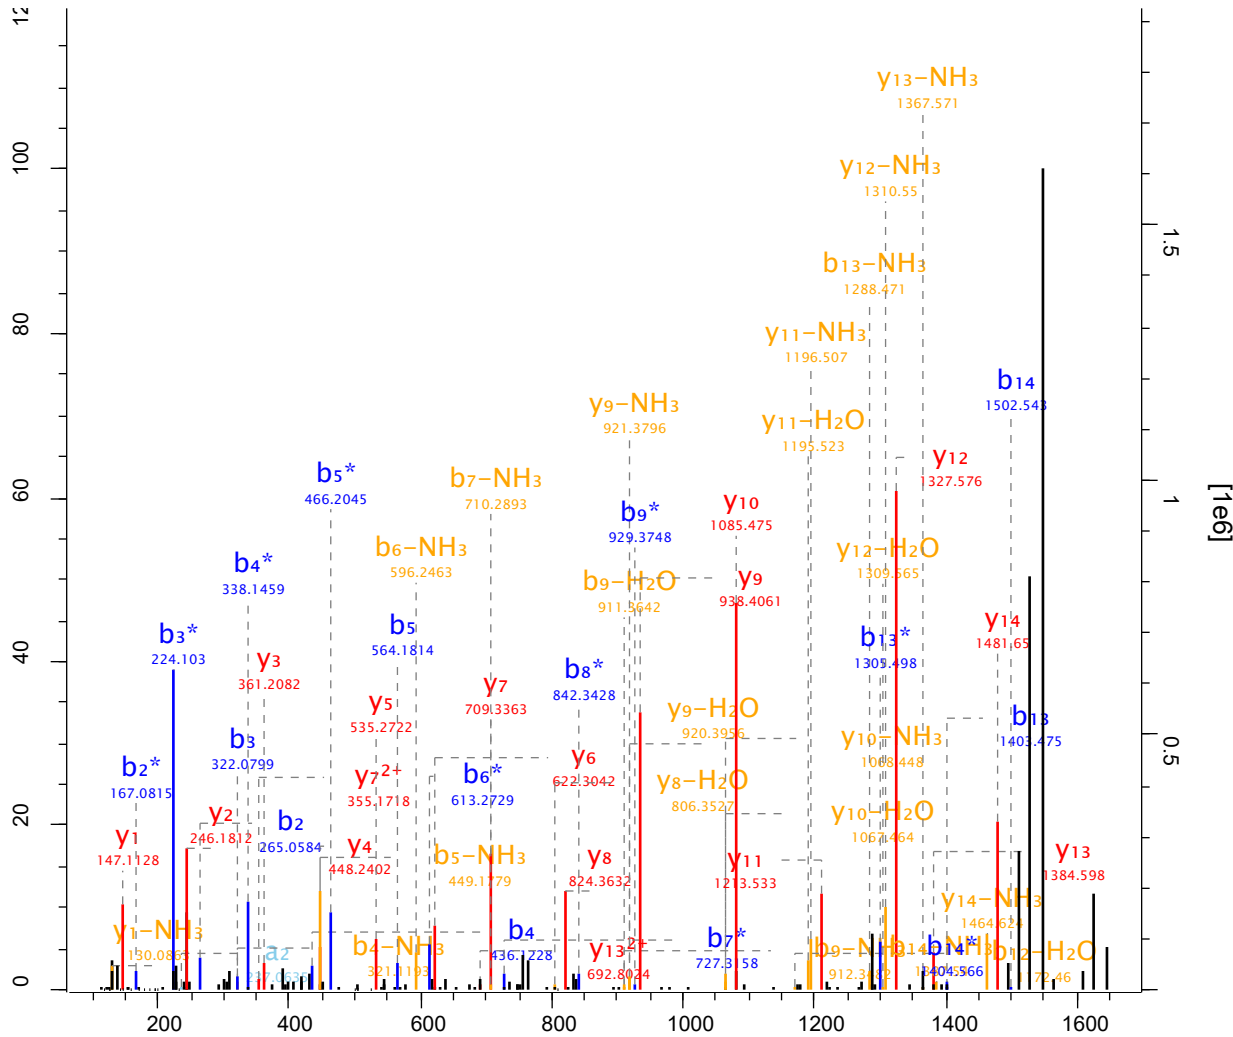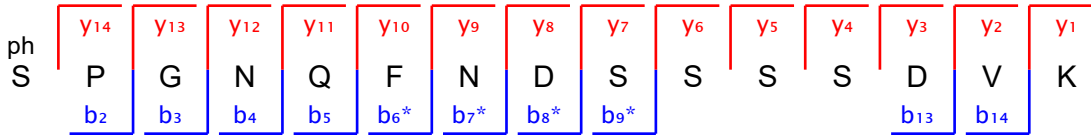

Raw file Scan Method Score m/z  
 sys\_15\_1 9633 FTMS; HCD 70.09 514.72

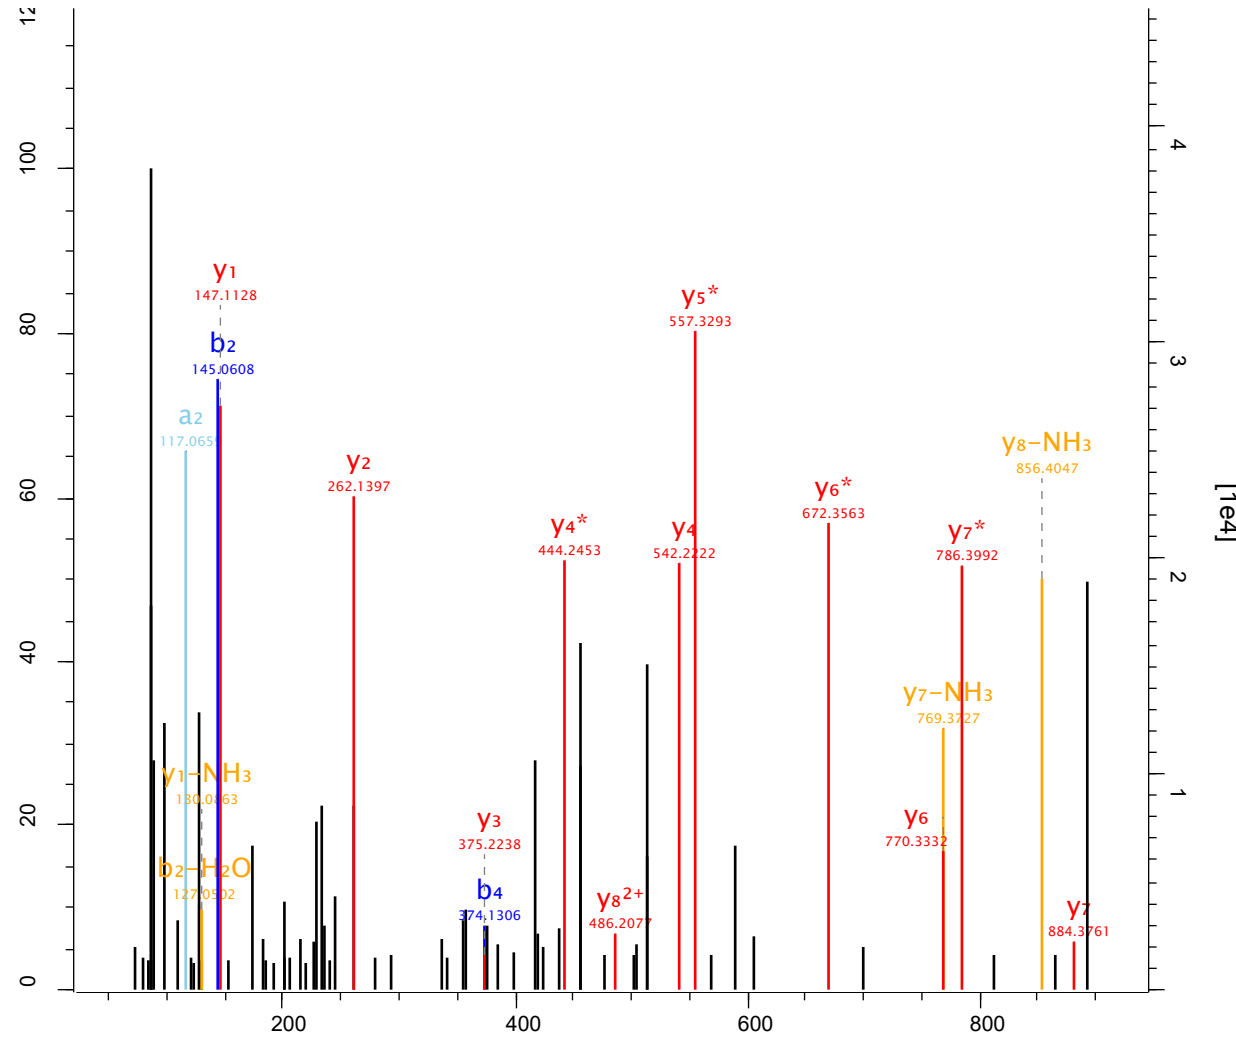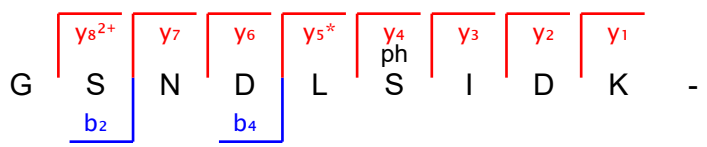



Raw file Scan Method Score m/z  
 sys\_15\_1 9646 FTMS; HCD 138.55 621.28

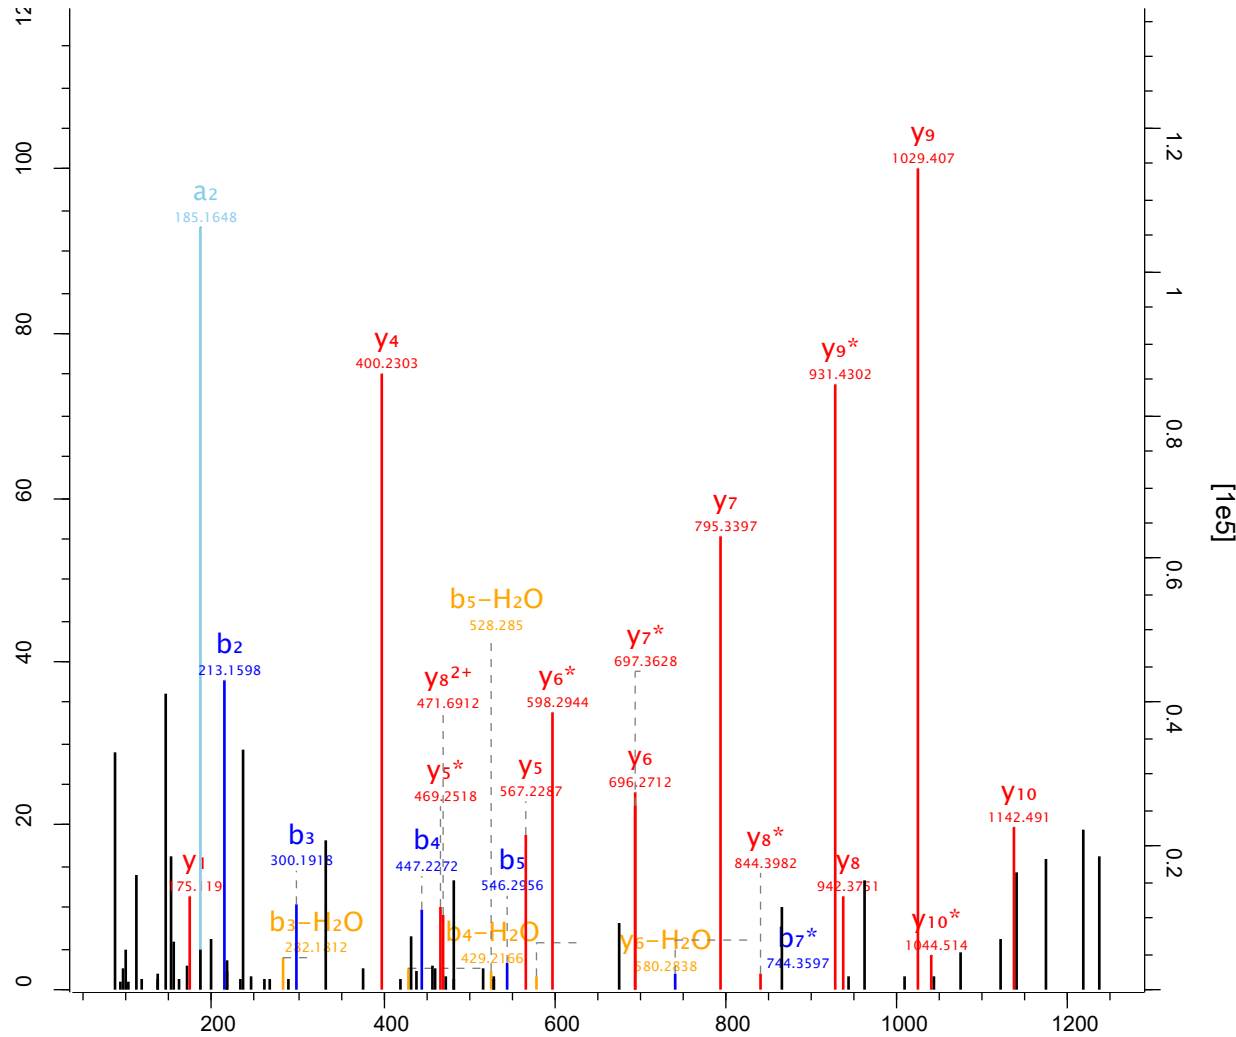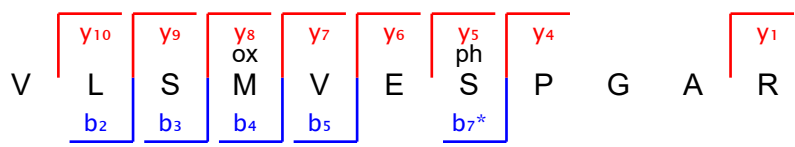

| Raw file | Scan | Method    | Score | m/z    |
|----------|------|-----------|-------|--------|
| sys_15_1 | 9647 | FTMS; HCD | 73.93 | 586.75 |

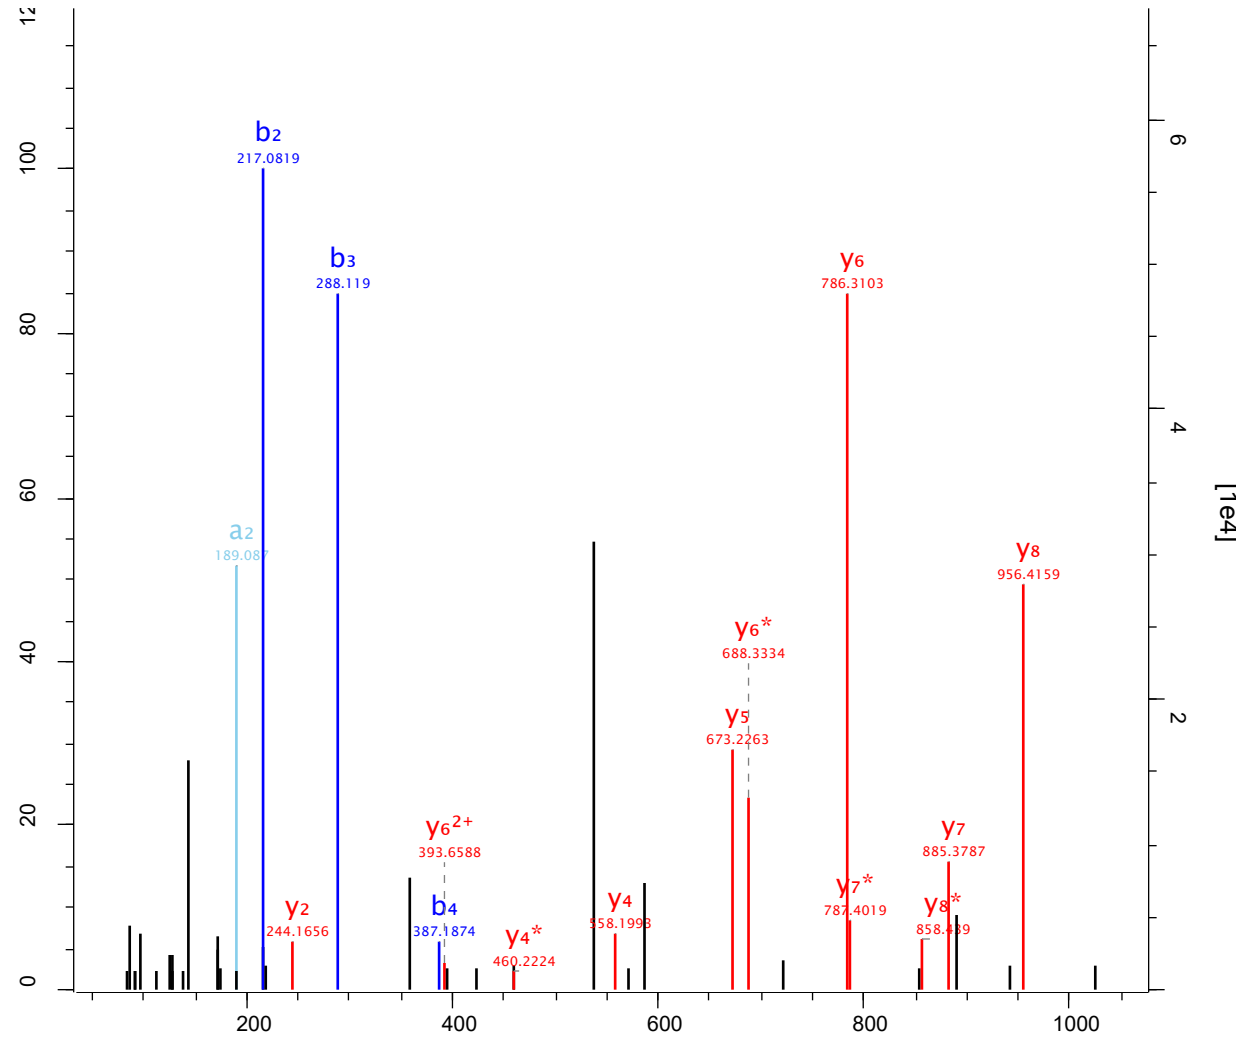

- S E A V L D M ph S P K -

Fragmentation sites are indicated by brackets below the sequence:

- Blue brackets: b<sub>2</sub> (under E), b<sub>3</sub> (under A), b<sub>4</sub> (under V)
- Red brackets: y<sub>2</sub> (under P), y<sub>4</sub> (under M), y<sub>5</sub> (under D), y<sub>6</sub> (under L), y<sub>7</sub> (under V), y<sub>8</sub> (under A)

Raw file Scan Method Score m/z  
 sys\_15\_1 9650 FTMS; HCD 63.69 690.26

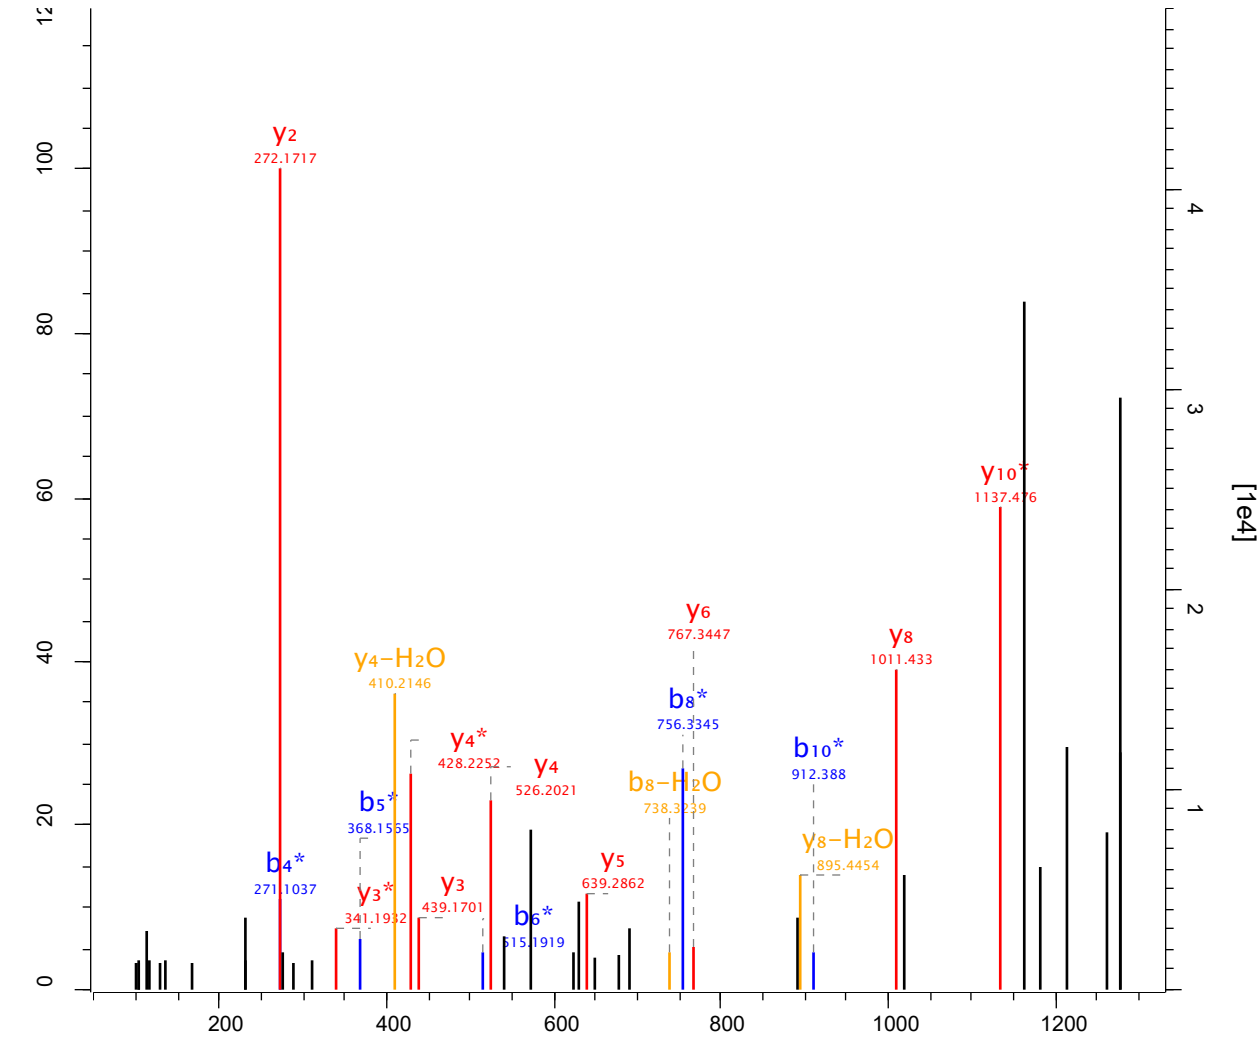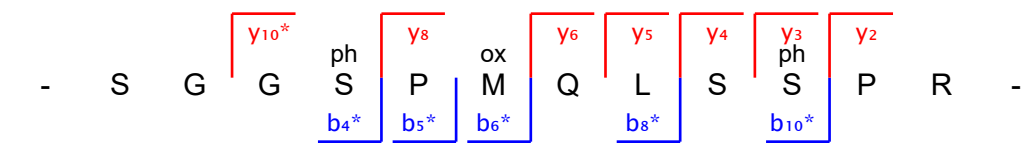

Raw file Scan Method Score m/z  
 sys\_15\_1 9755 FTMS; HCD 43.03 594.25

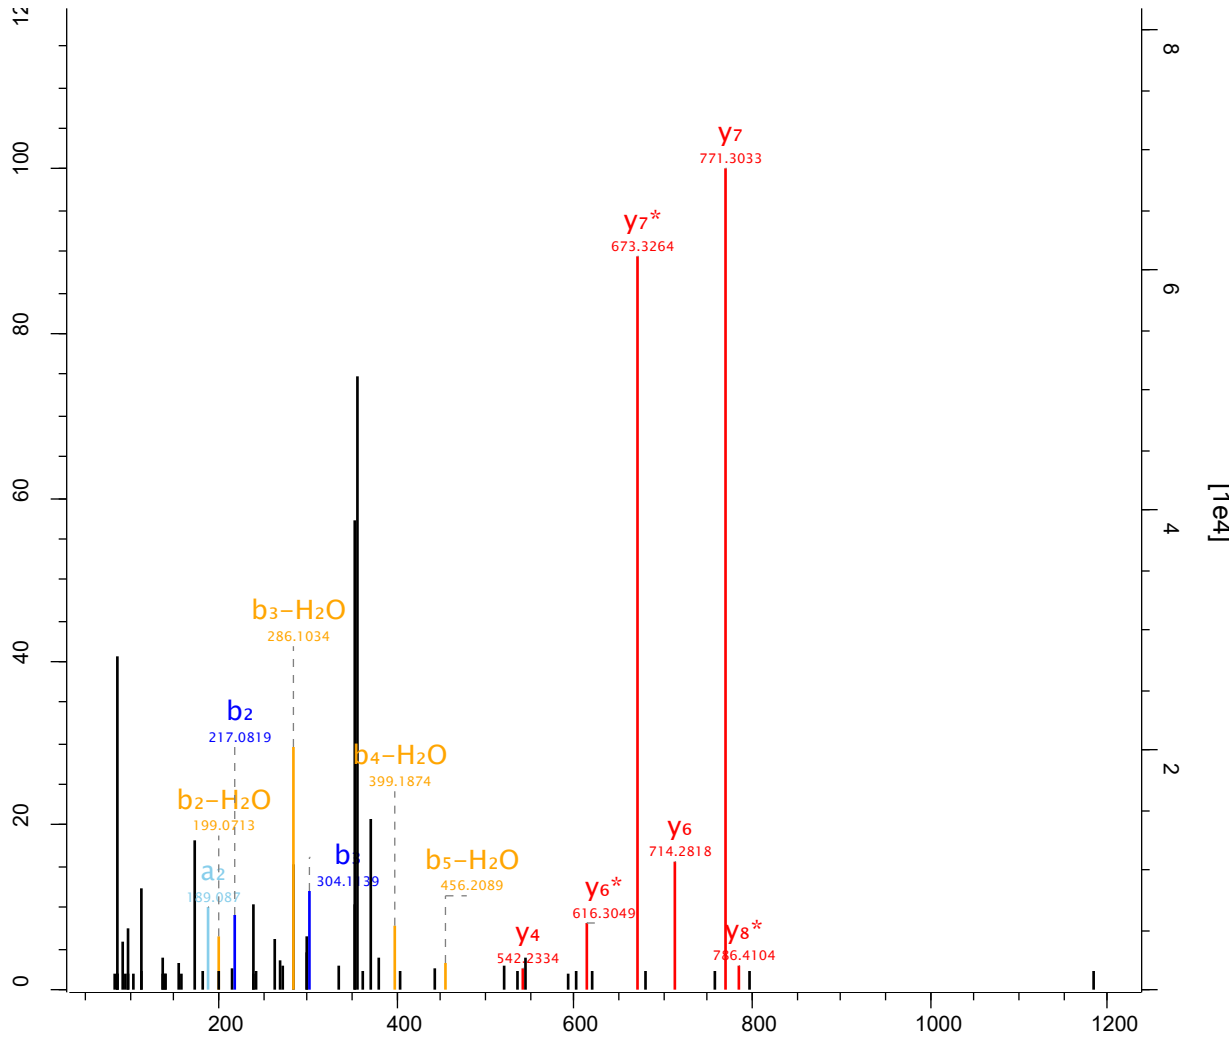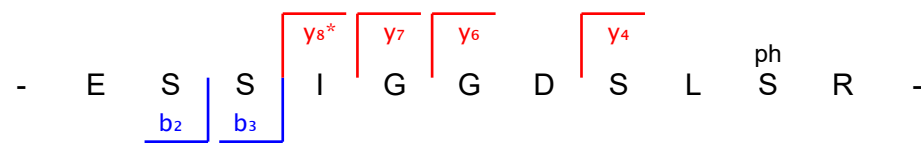

Raw file Scan Method Score m/z  
 sys\_15\_1 9763 FTMS; HCD 92.38 484.87

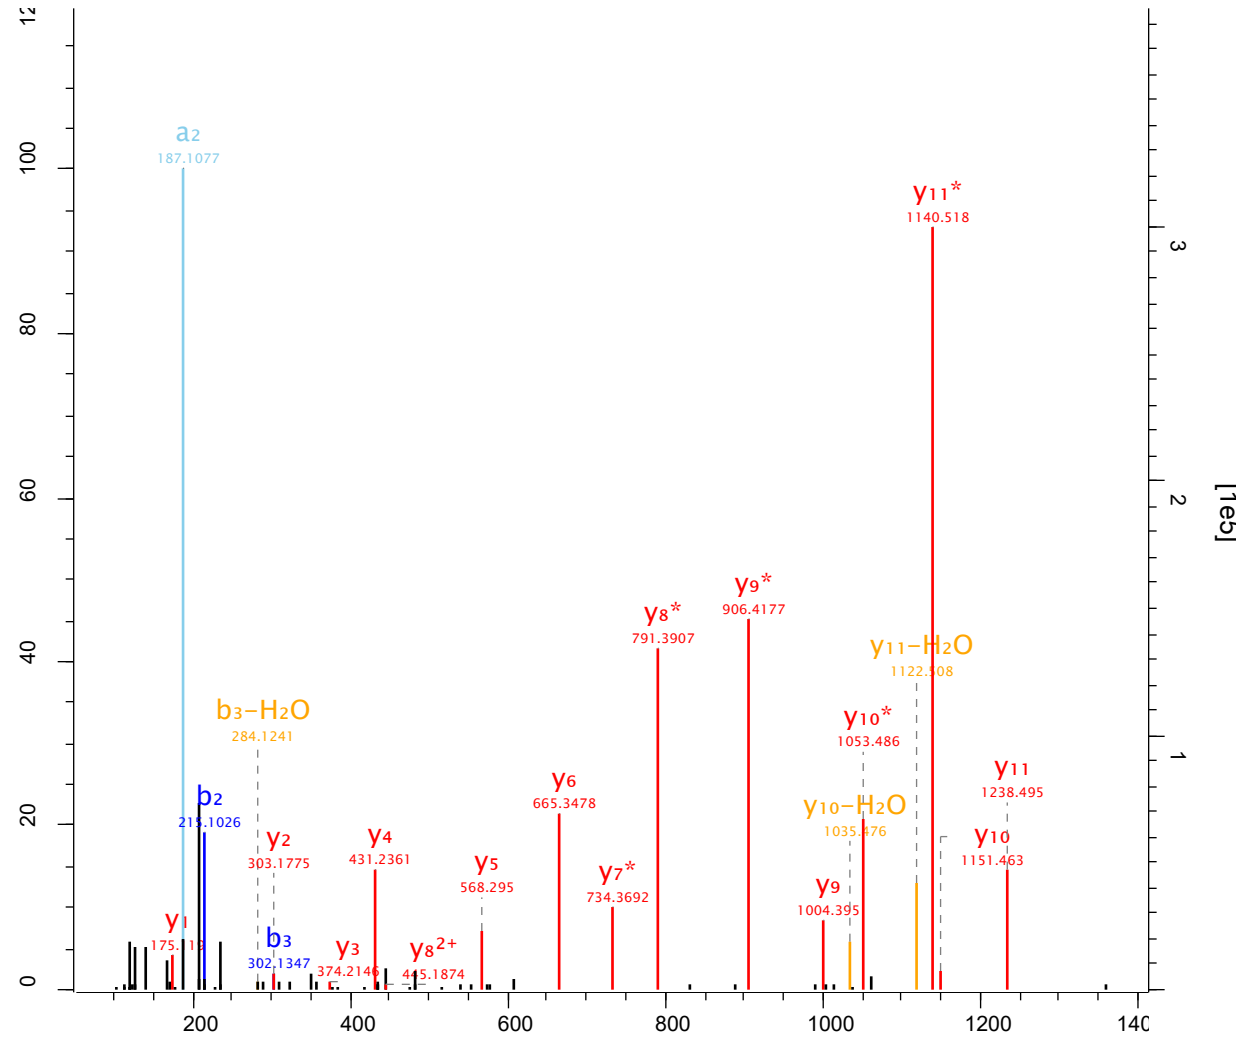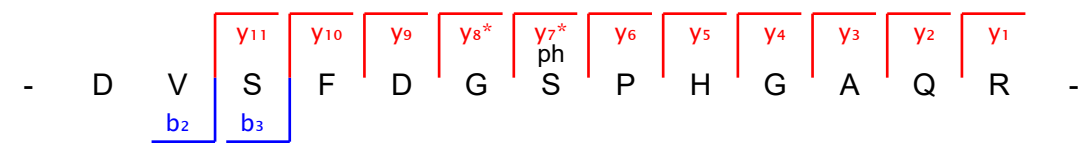

| Raw file | Scan | Method    | Score | m/z   |
|----------|------|-----------|-------|-------|
| sys_15_1 | 9783 | FTMS; HCD | 52.17 | 693.3 |

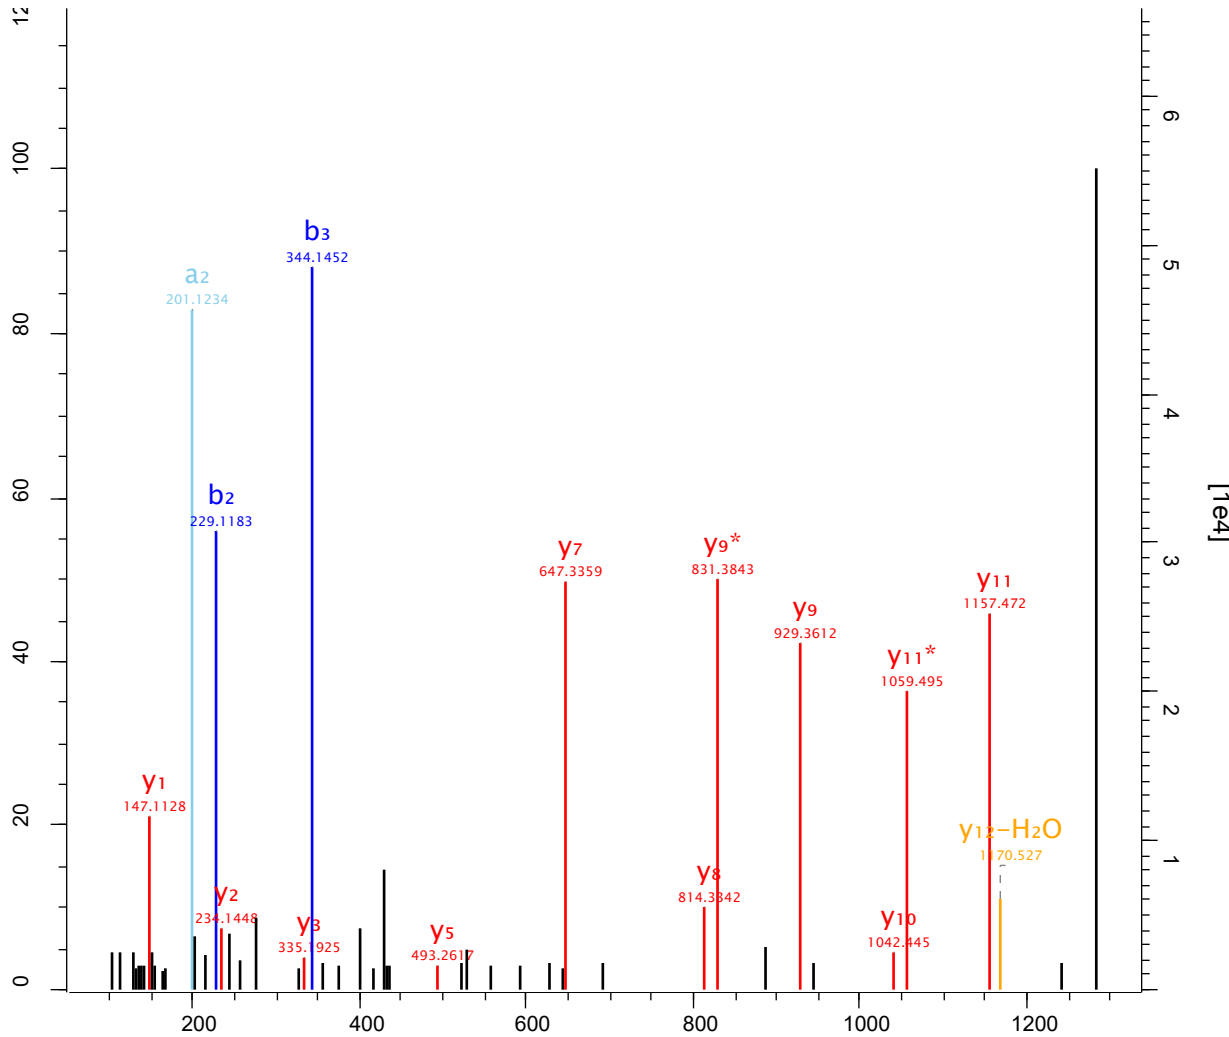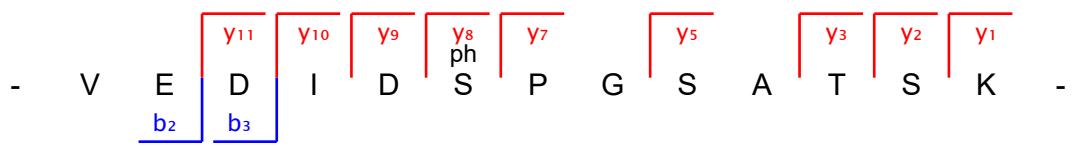

Raw file Scan Method Score m/z  
 sys\_15\_1 9788 FTMS; HCD 86.21 624.6

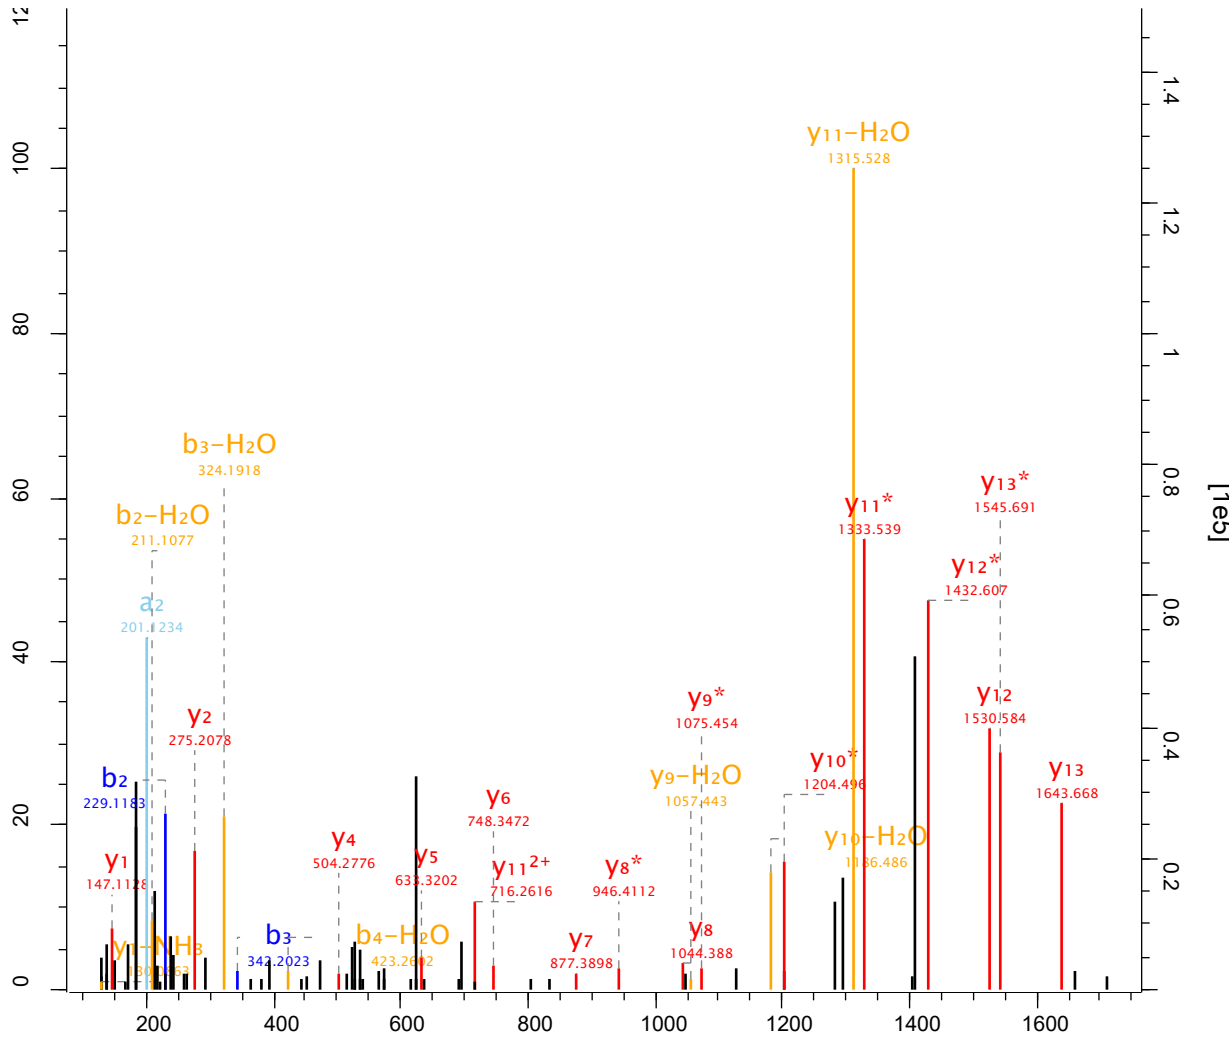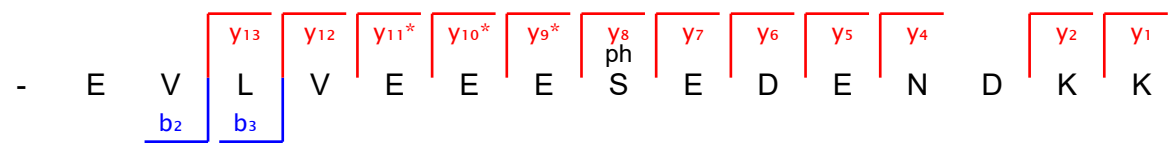

Raw file Scan Method Score m/z  
 sys\_15\_1 9832 FTMS; HCD 50.04 644.79

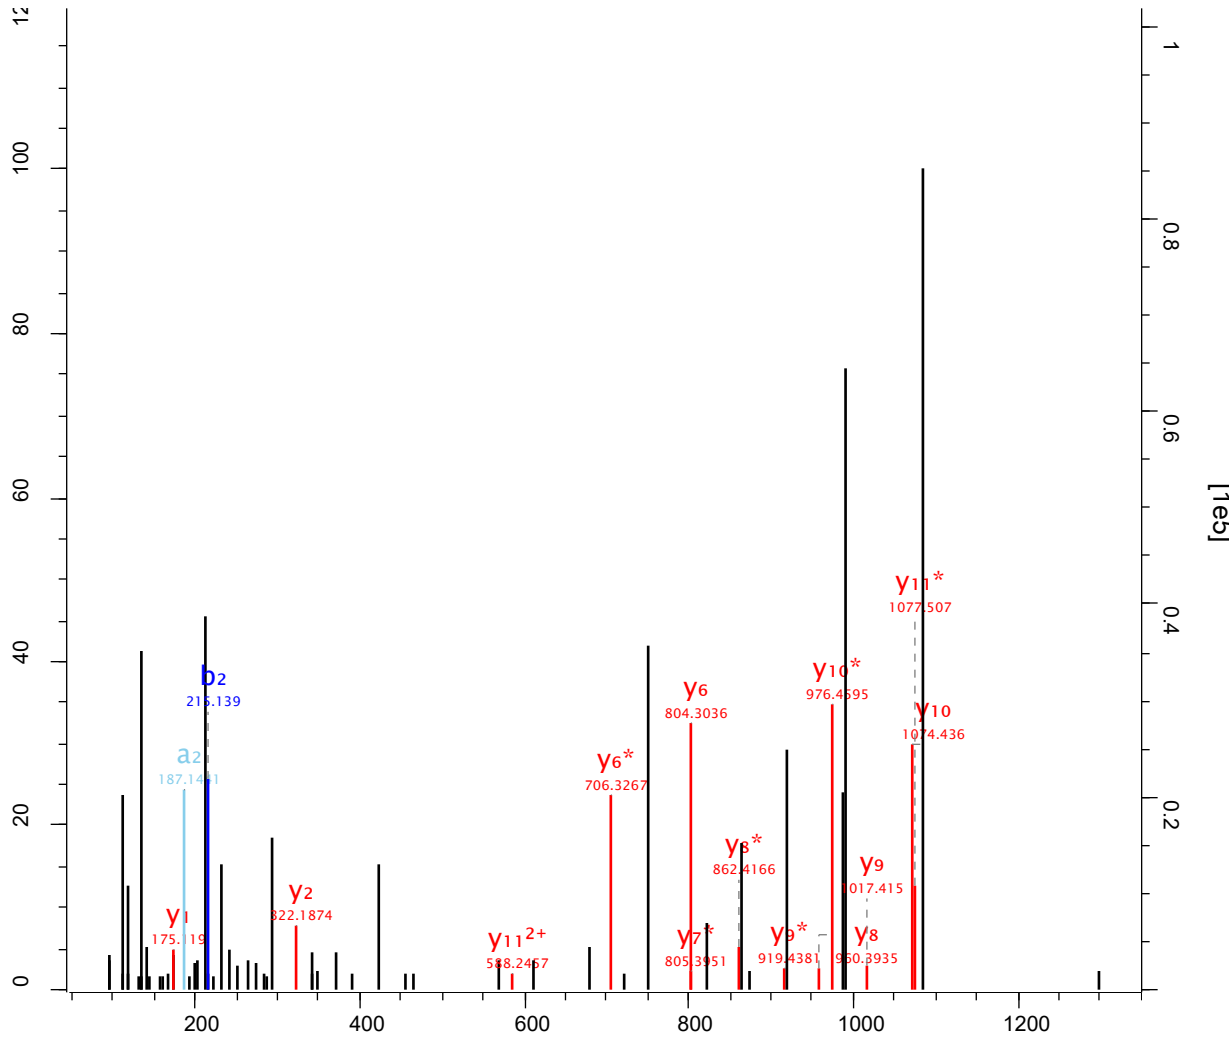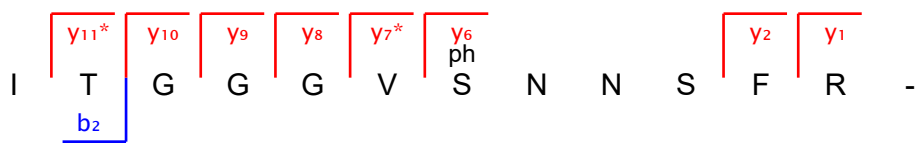



Raw file Scan Method Score m/z  
 sys\_15\_1 9901 FTMS; HCD 80.23 418.22

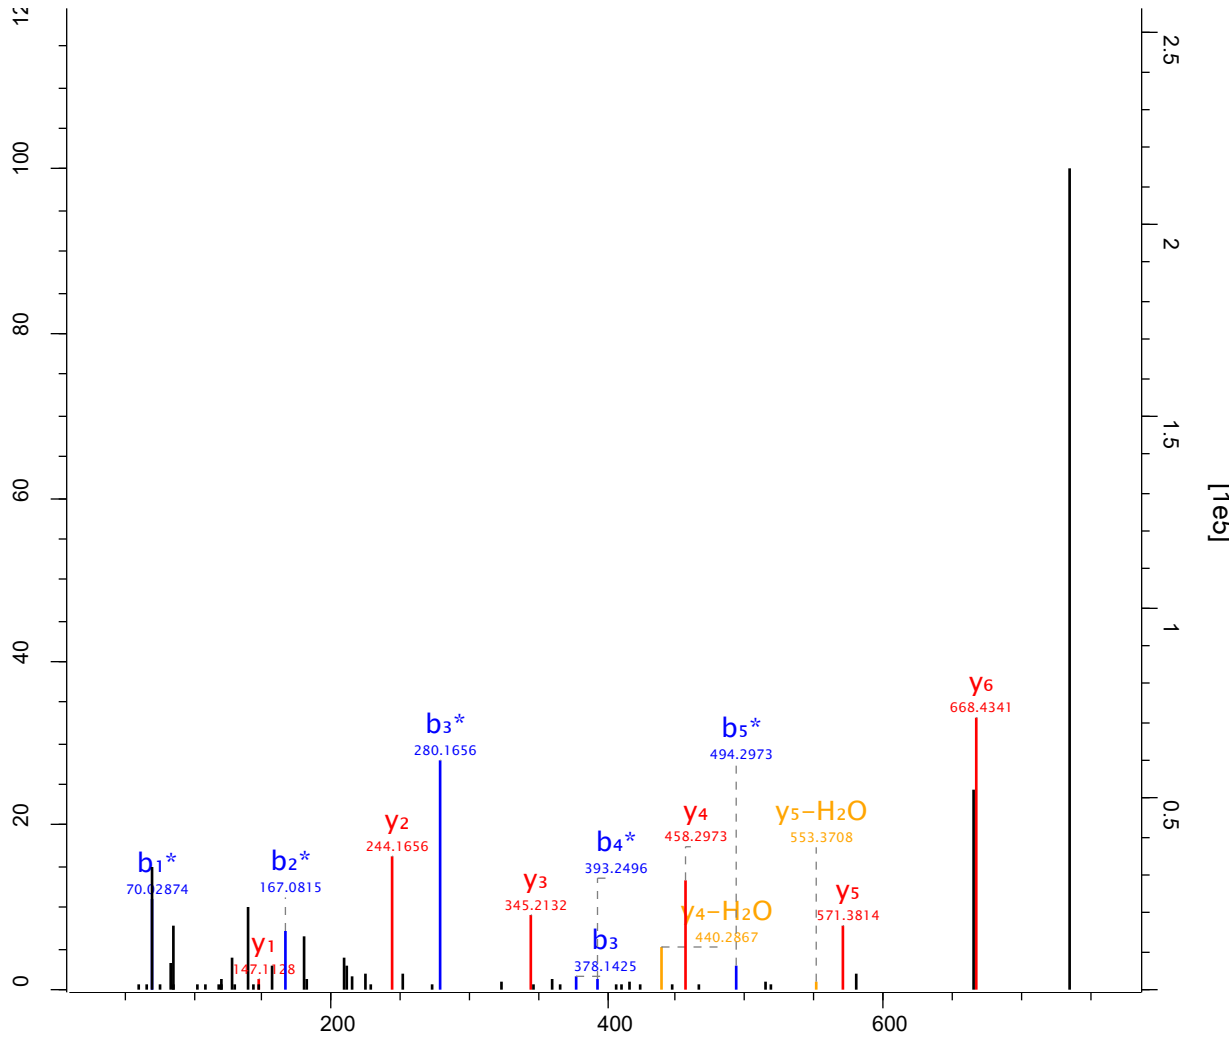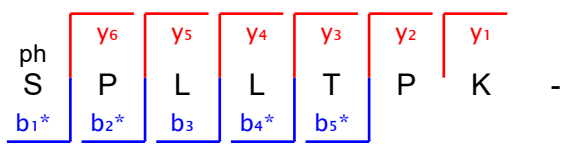

Raw file Scan Method Score m/z  
 sys\_15\_1 9961 FTMS; HCD 96.49 635.26

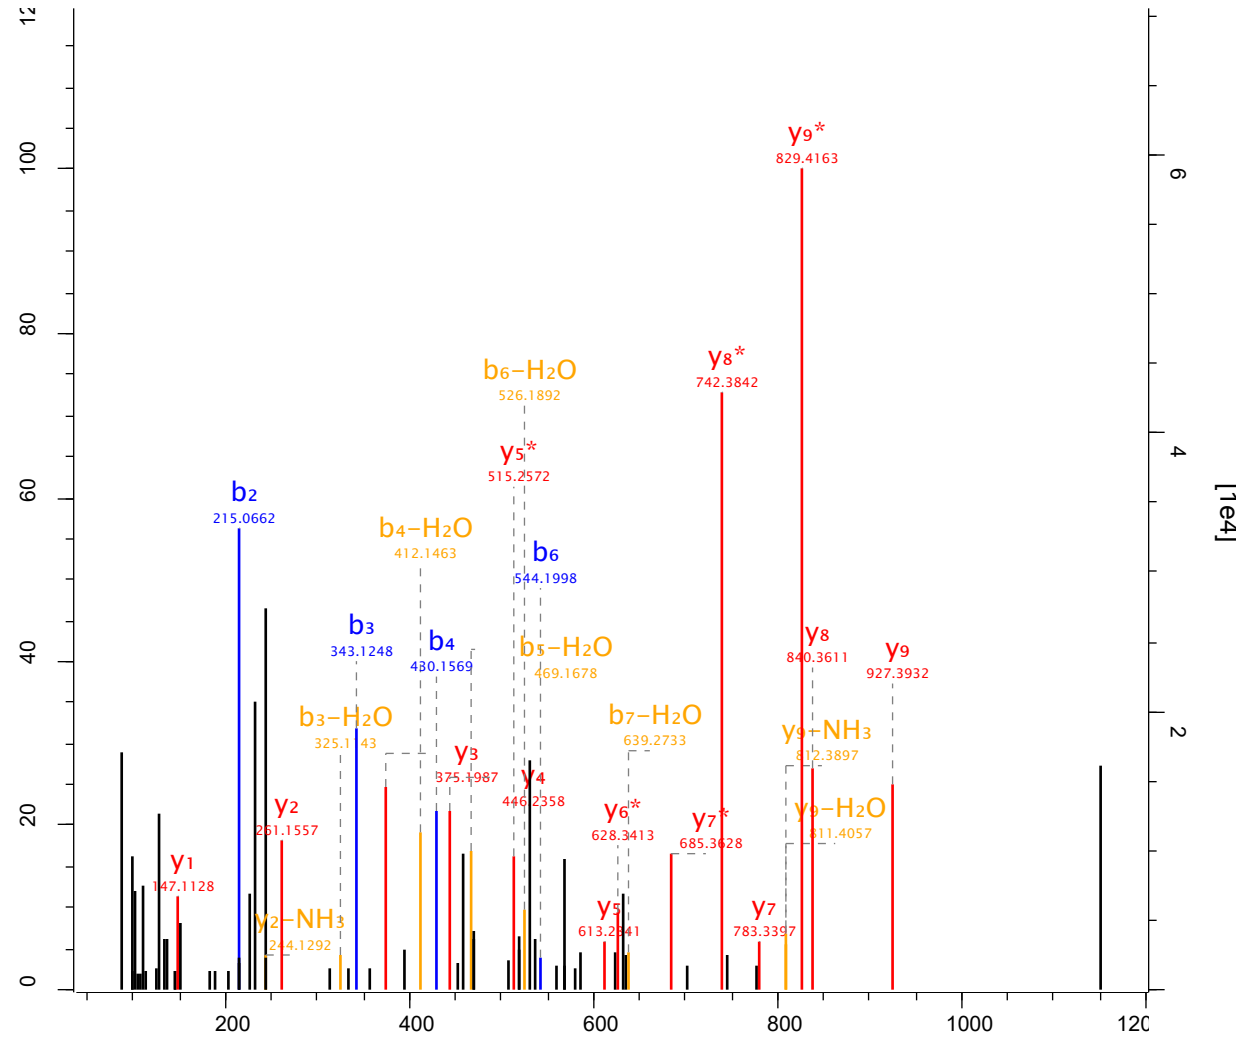

ac  
 - G D Q S G G L S A N N K -  
 b2 b3 b4 b6

Raw file Scan Method Score m/z  
 sys\_15\_1 9998 FTMS; HCD 79.92 707.82

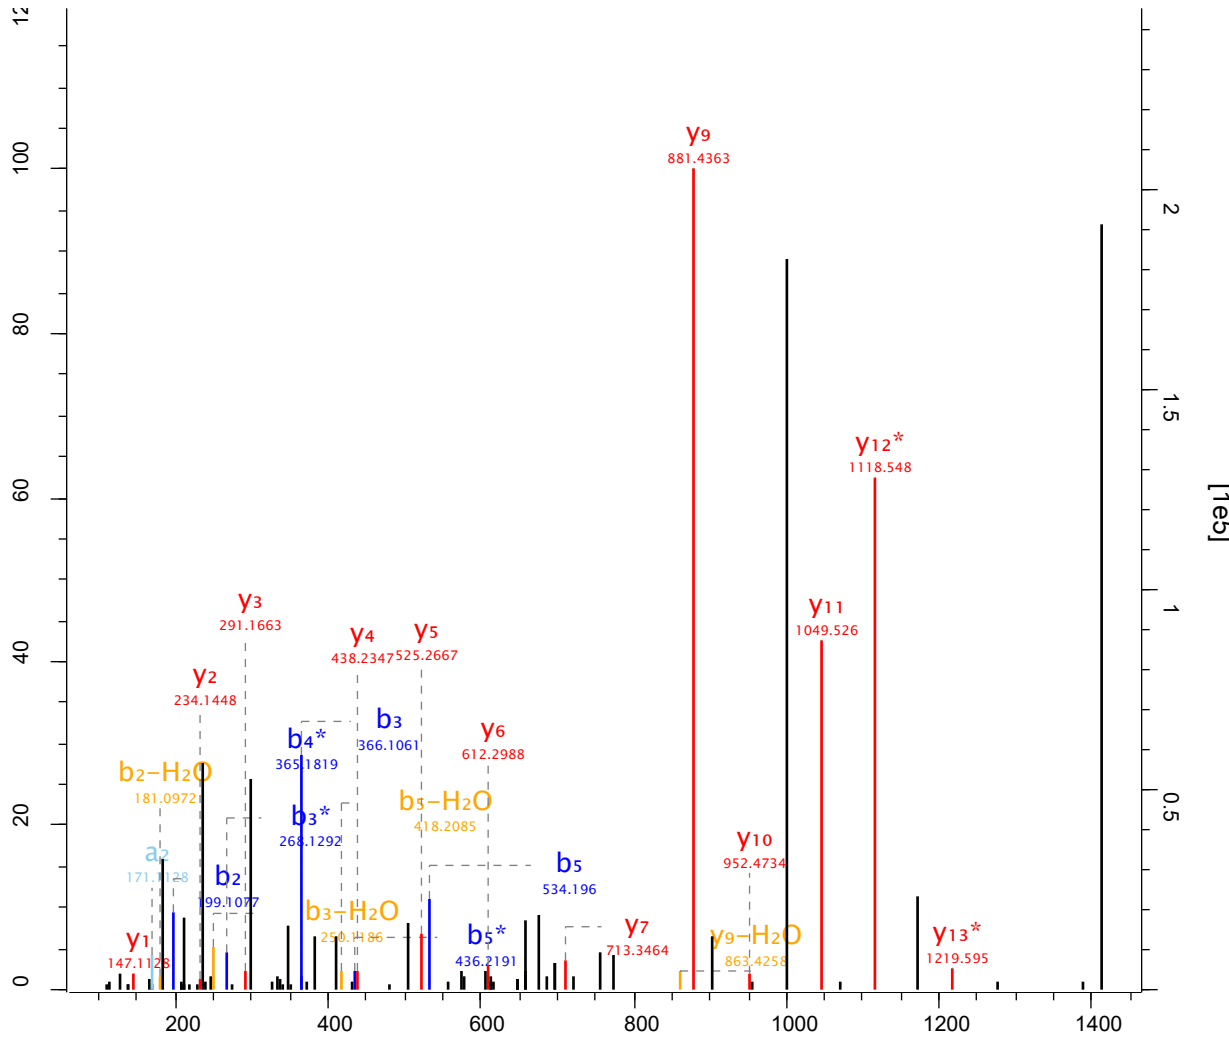

- P T S P A P A T S S F G S K -

b<sub>2</sub>
b<sub>3</sub>
b<sub>4</sub><sup>\*</sup>
b<sub>5</sub>
y<sub>13</sub><sup>\*</sup>
y<sub>12</sub><sup>\*</sup>ph
y<sub>11</sub>
y<sub>10</sub>
y<sub>9</sub>
y<sub>7</sub>
y<sub>6</sub>
y<sub>5</sub>
y<sub>4</sub>
y<sub>3</sub>
y<sub>2</sub>
y<sub>1</sub>

Raw file Scan Method Score m/z  
 sys\_15\_2 30107 FTMS; HCD 185.25 798.87

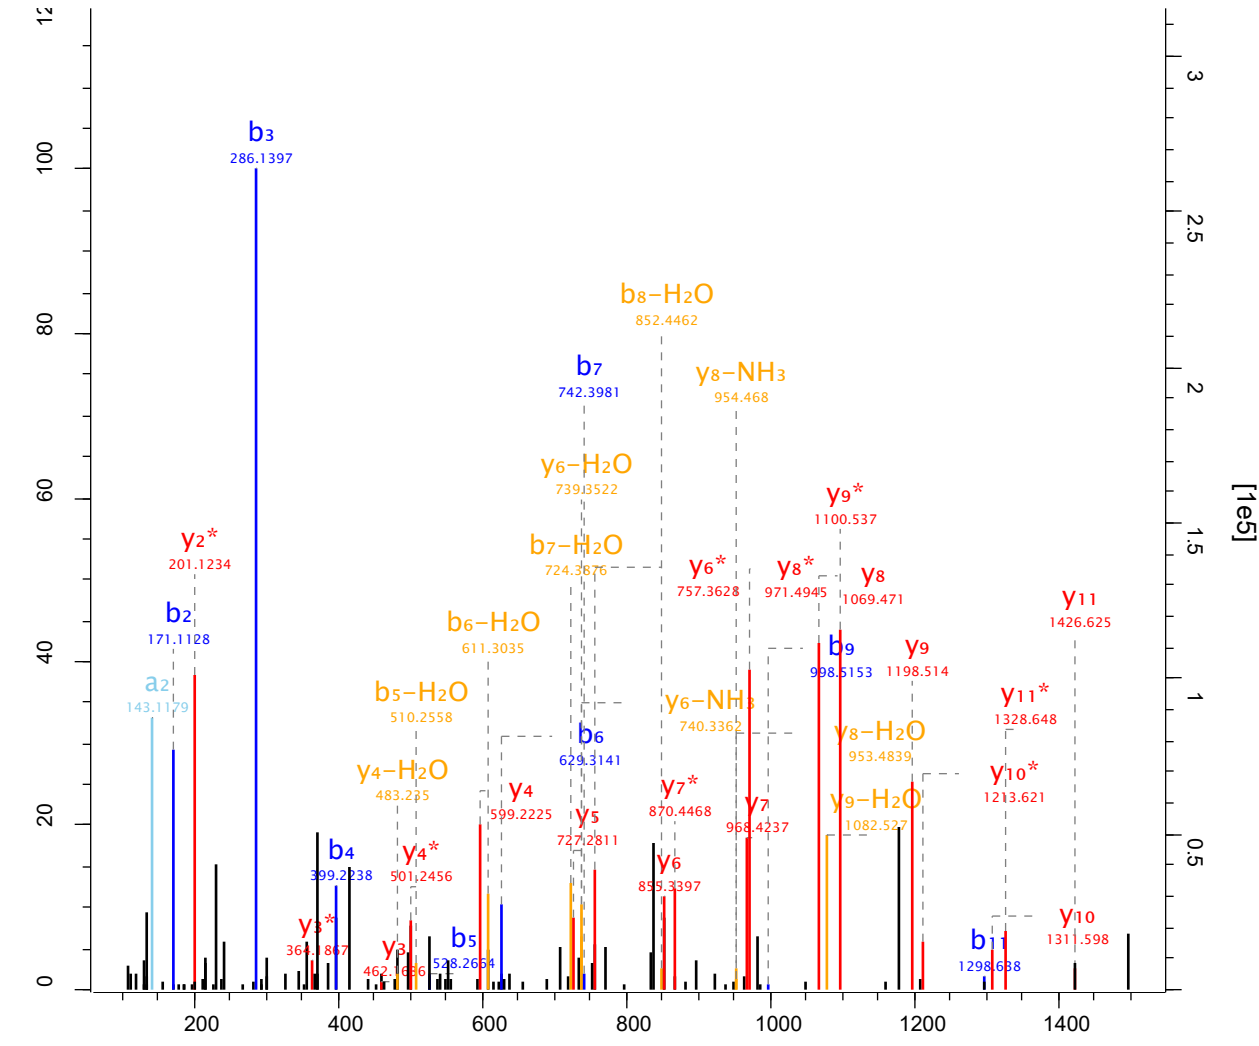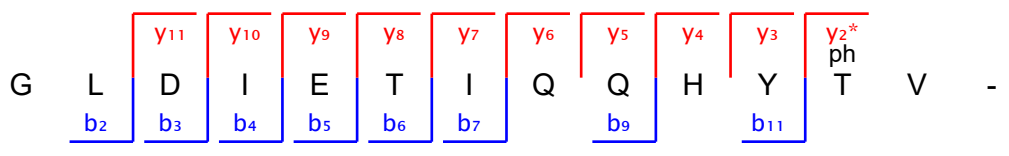

Raw file Scan Method Score m/z  
 sys\_15\_2 30707 FTMS; HCD 109.53 832.7

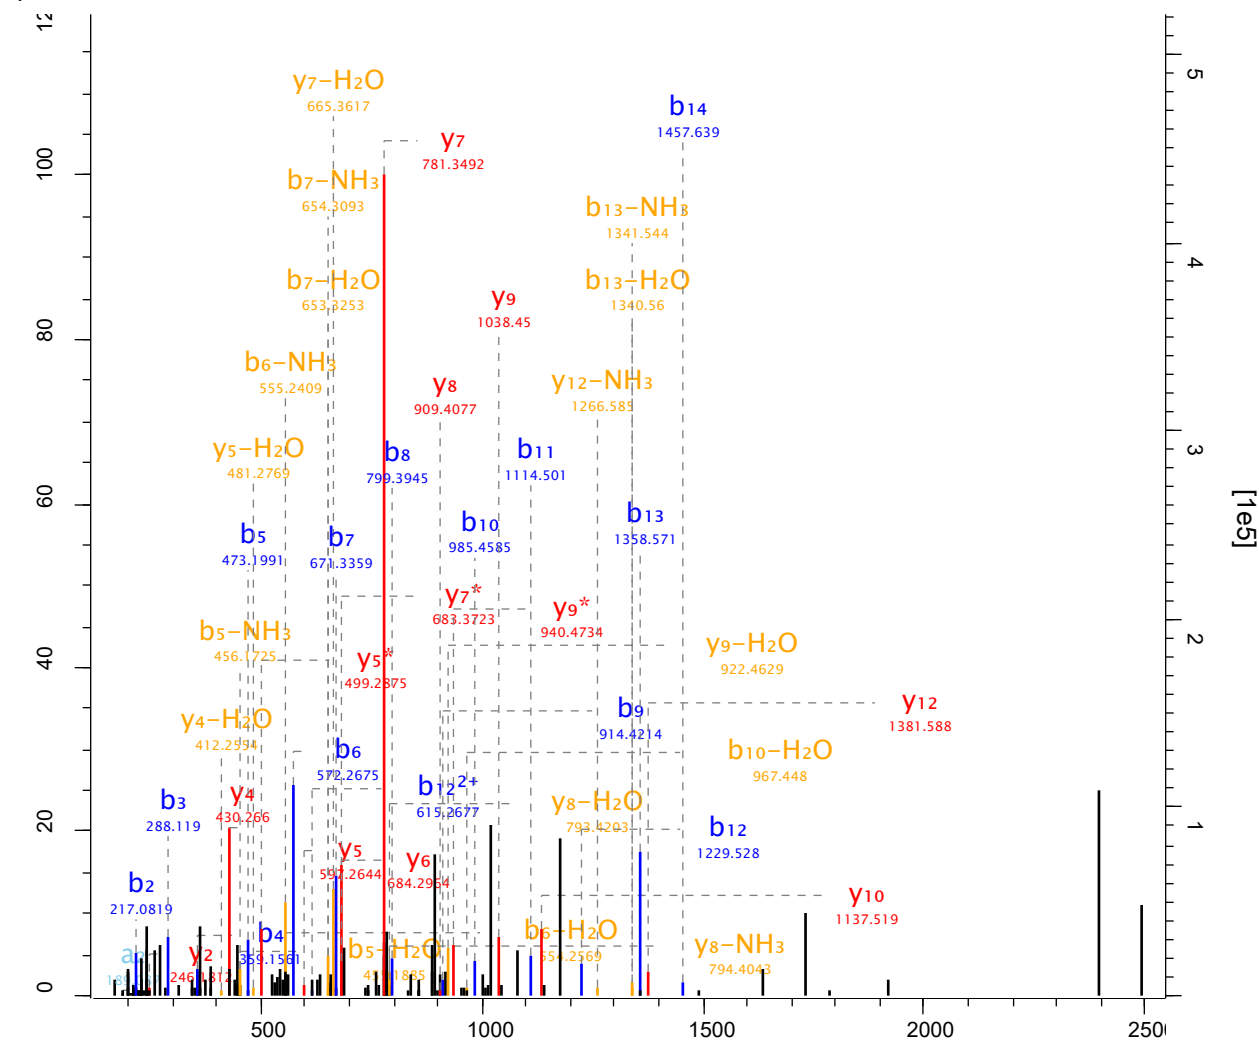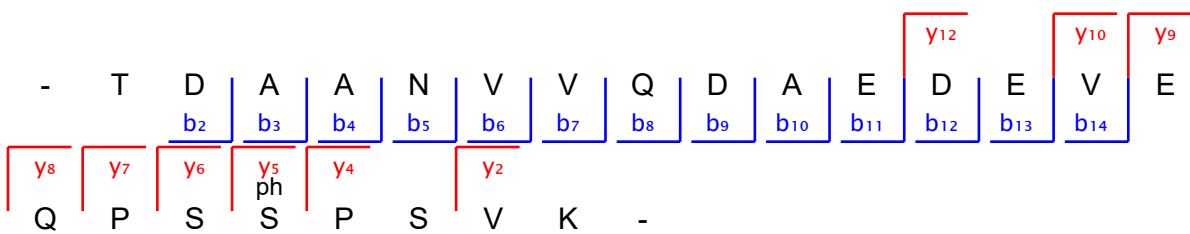

Q P S S P S V K -

Raw file Scan Method Score m/z  
 sys\_15\_2 33237 FTMS; HCD 54.47 1184.18

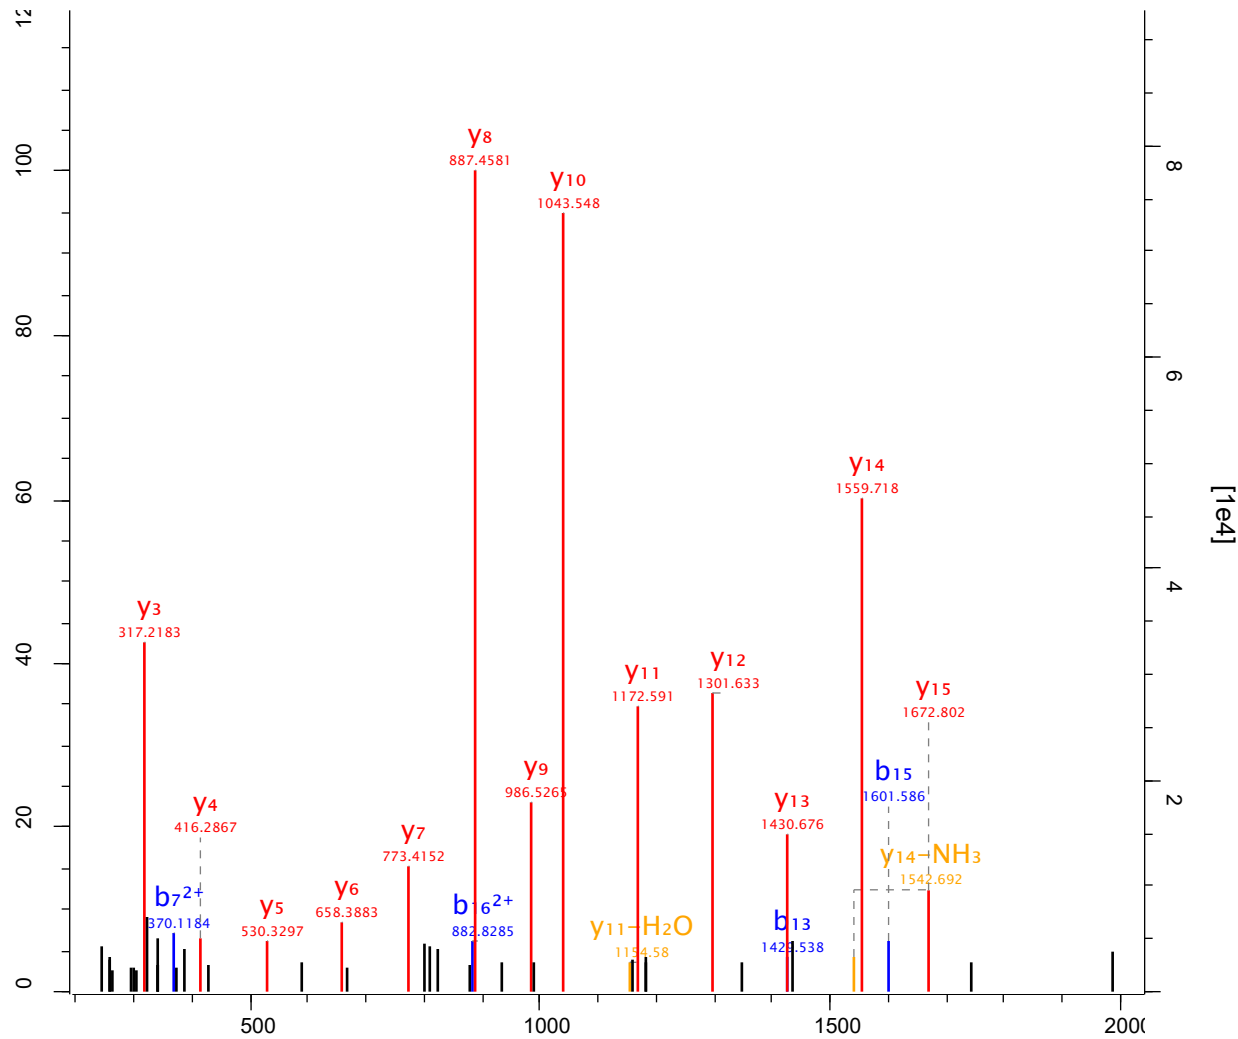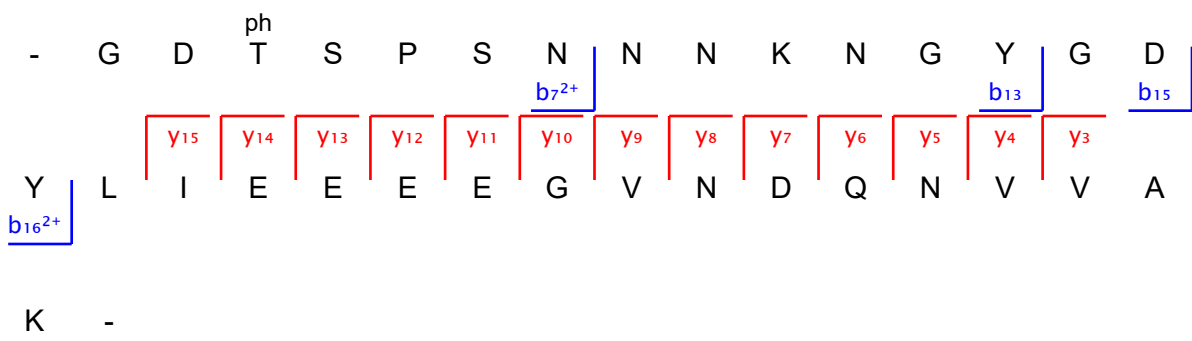

Raw file Scan Method Score m/z  
 sys\_15\_3 10504 FTMS; HCD 174.59 692.3

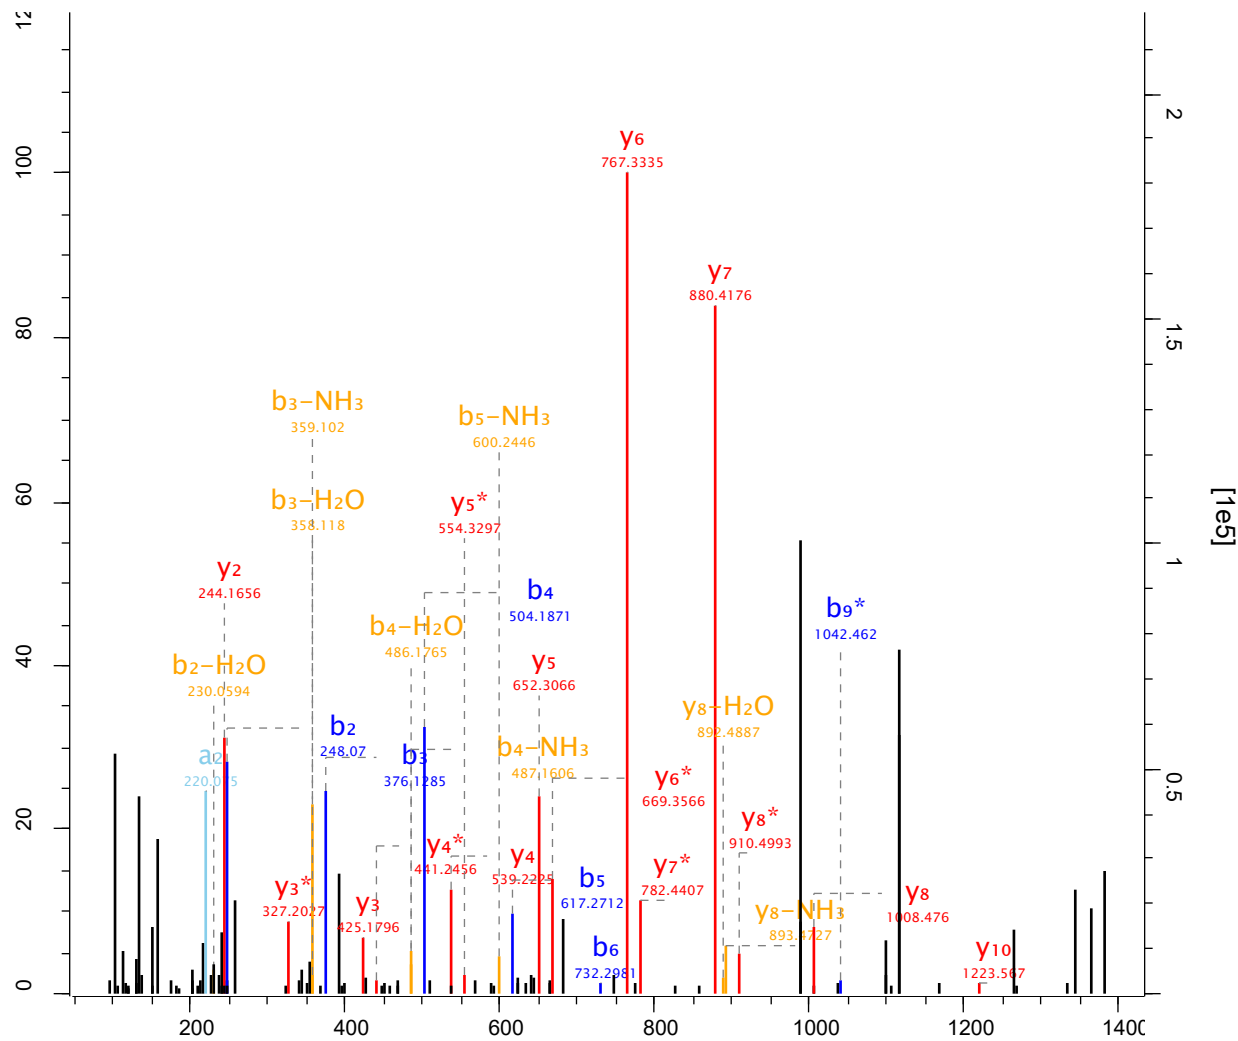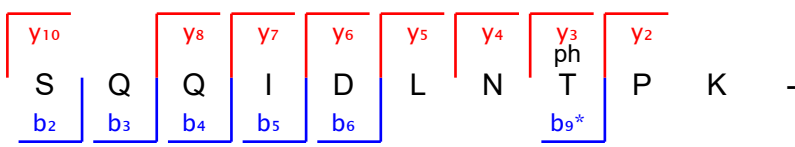

Raw file Scan Method Score m/z  
 sys\_15\_3 10529 FTMS; HCD 100.02 450.2

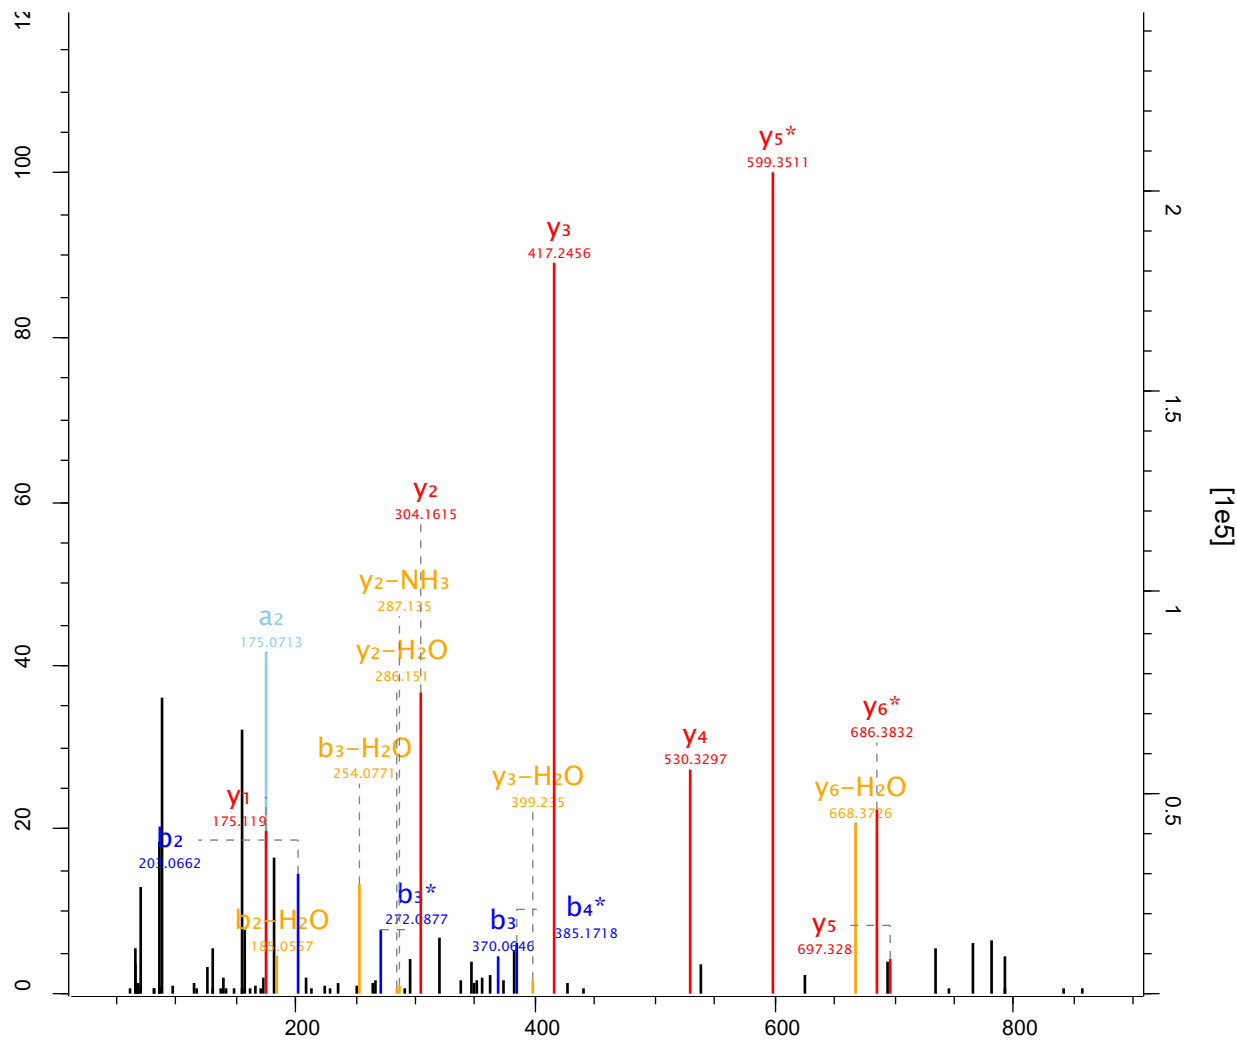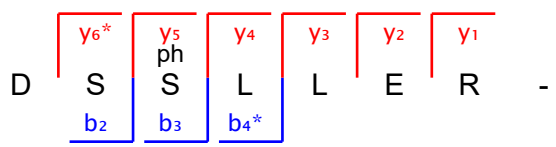



Raw file Scan Method Score m/z  
 sys\_15\_3 10634 FTMS; HCD 119.74 492.24

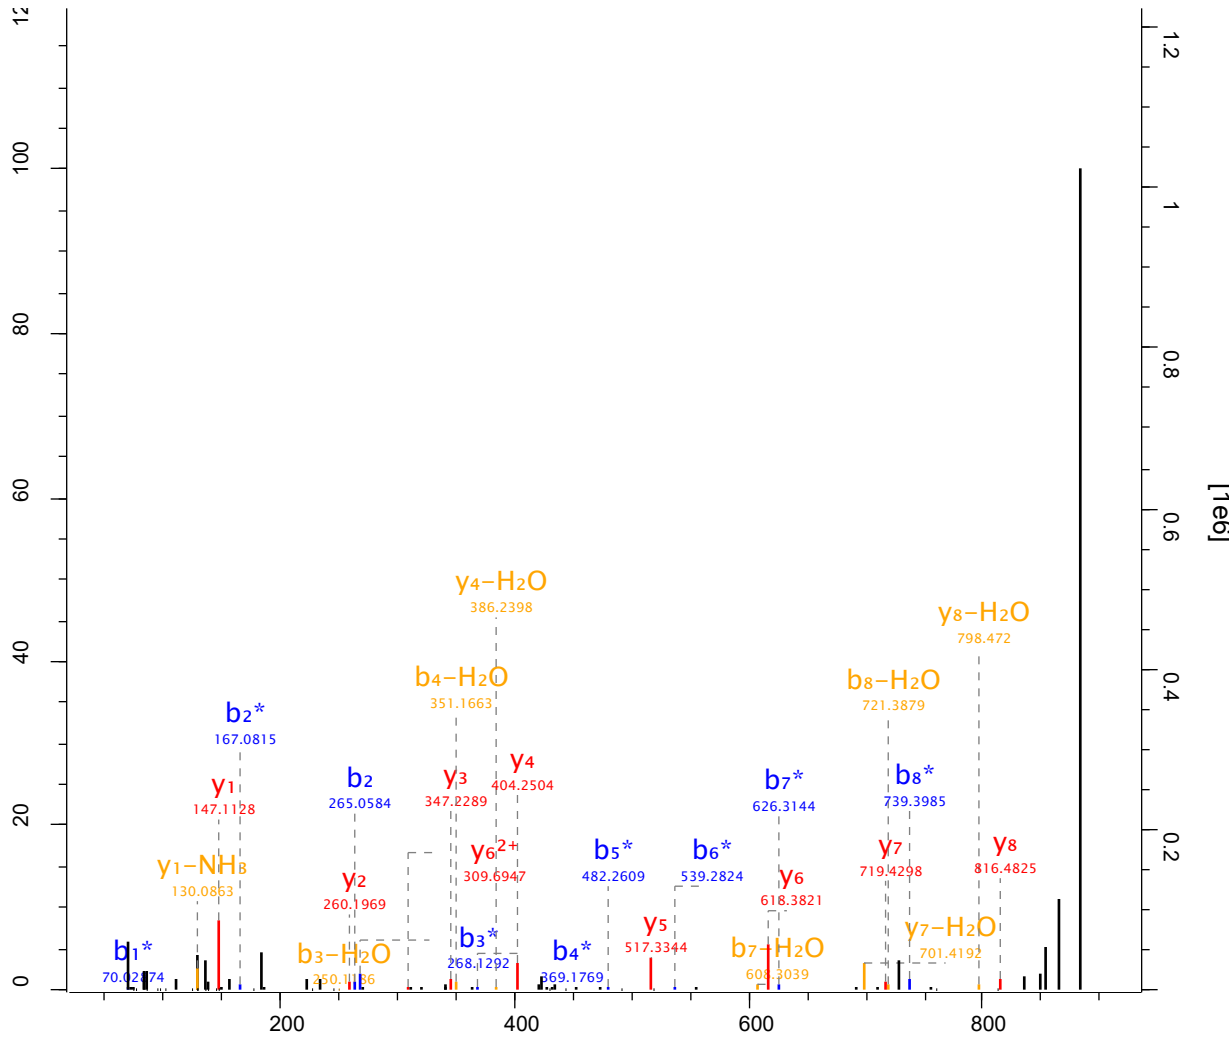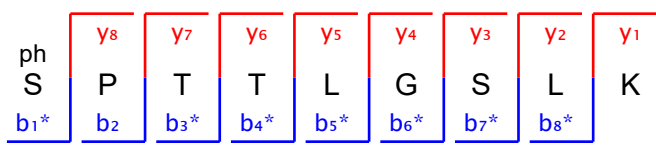

Raw file Scan Method Score m/z  
 sys\_15\_3 10648 FTMS; HCD 302.34 763.82

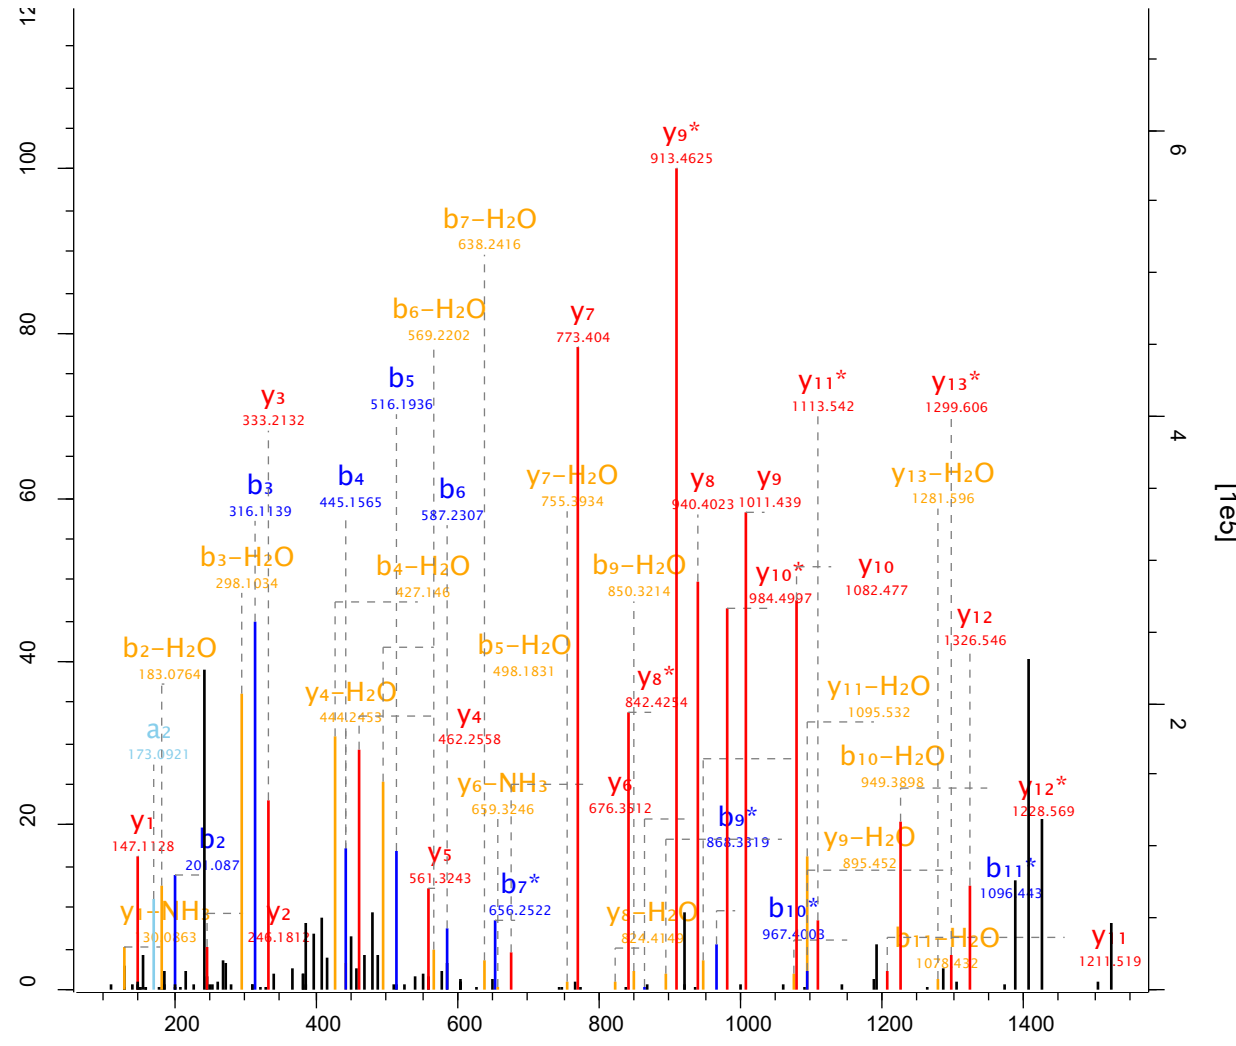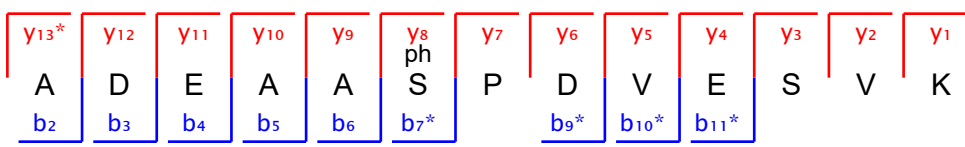

Raw file Scan Method Score m/z  
 sys\_15\_3 11470 FTMS; HCD 60.55 570.75

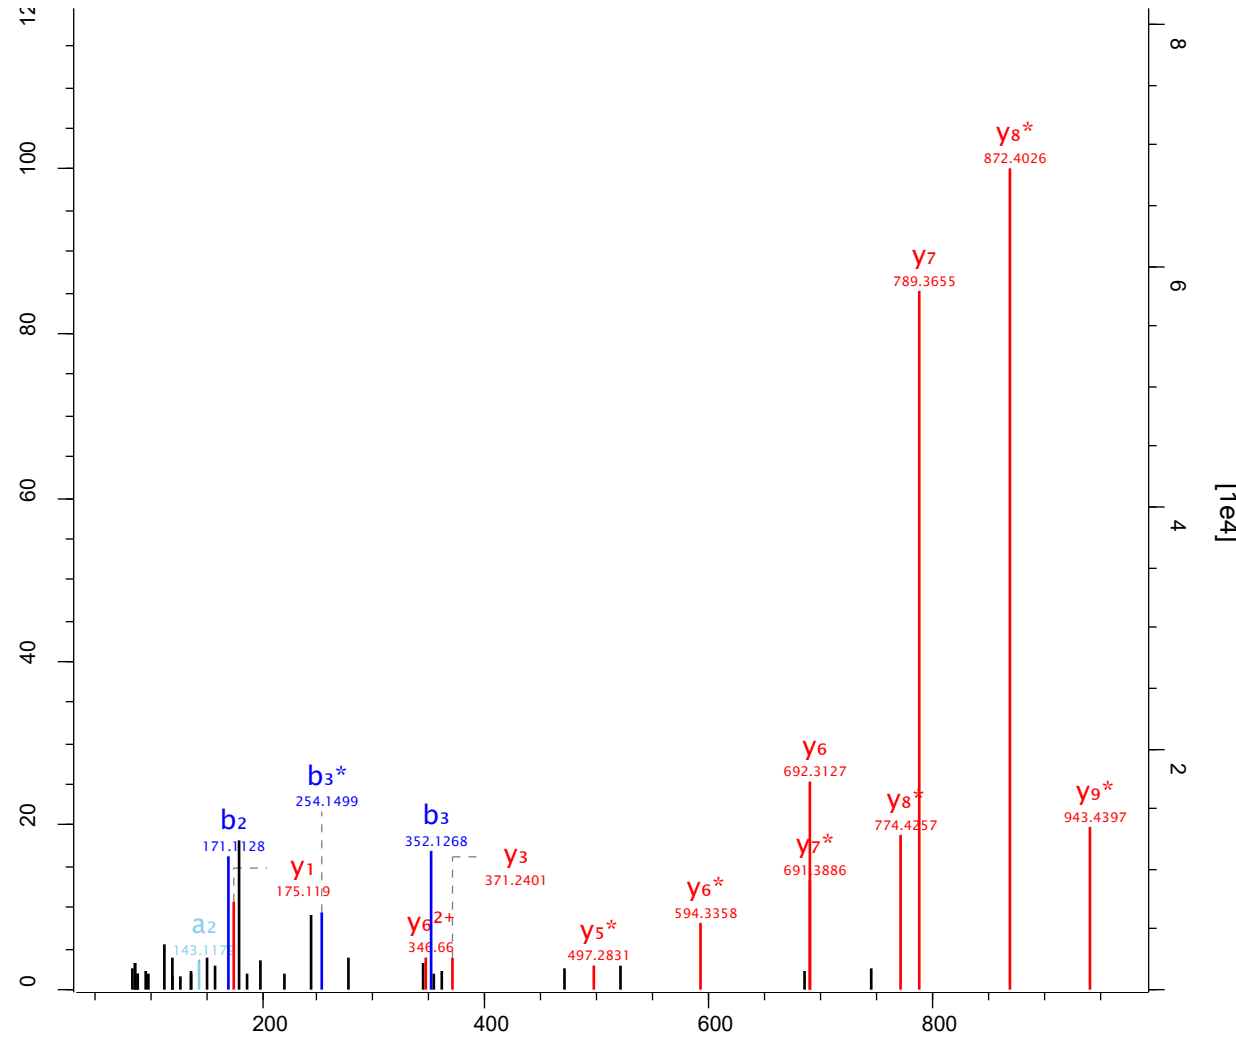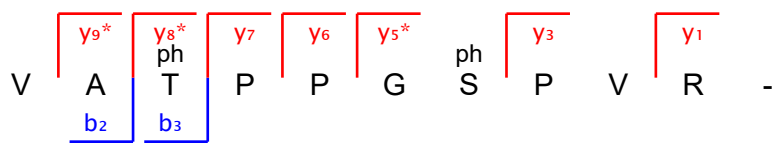

Raw file Scan Method Score m/z  
 sys\_15\_3 11940 FTMS; HCD 48.4 598.8

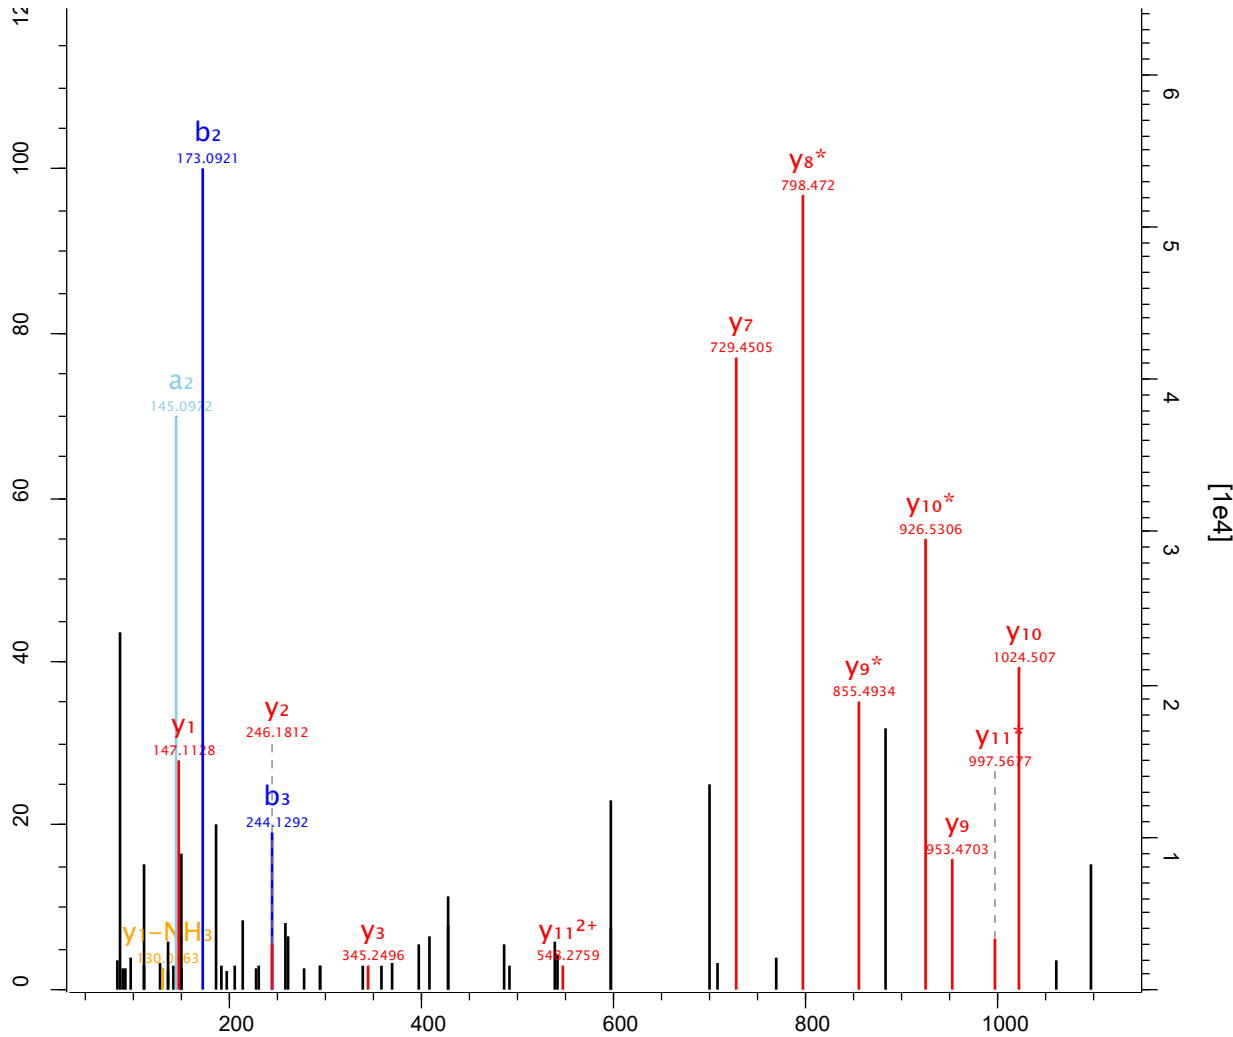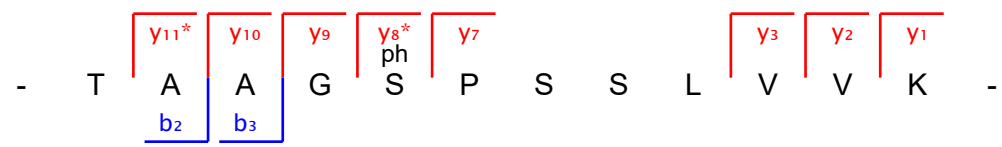

Raw file Scan Method Score m/z  
sys\_15\_3 12055 FTMS; HCD 45.28 583.27

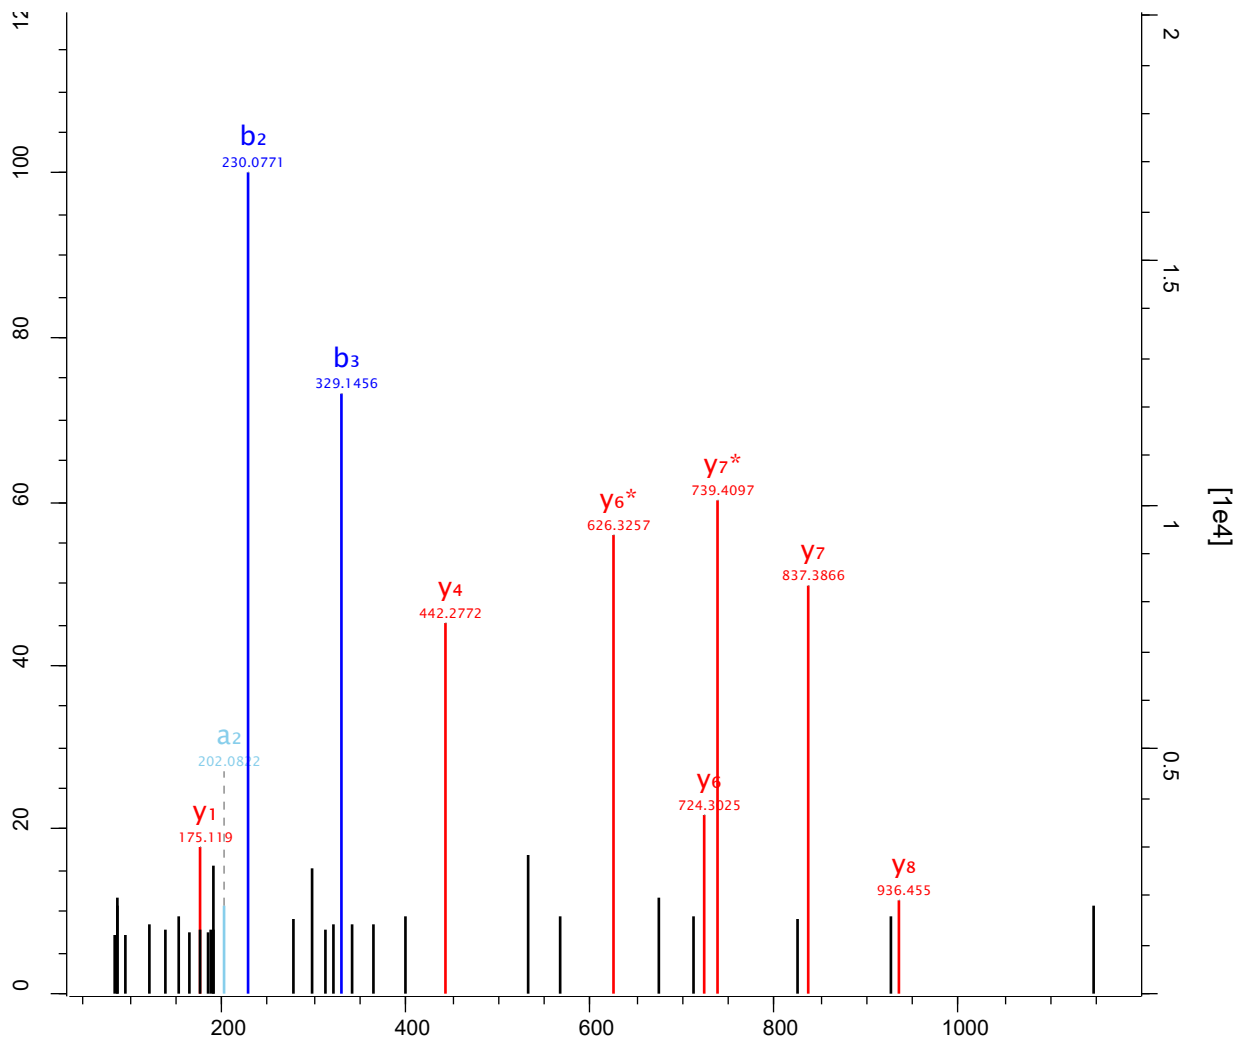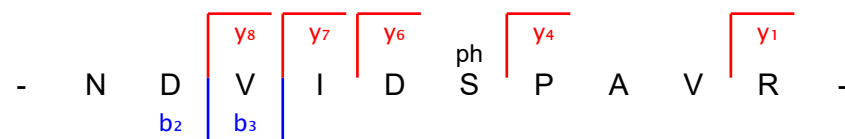

Raw file Scan Method Score m/z  
 sys\_15\_3 12963 FTMS; HCD 48.95 568.21

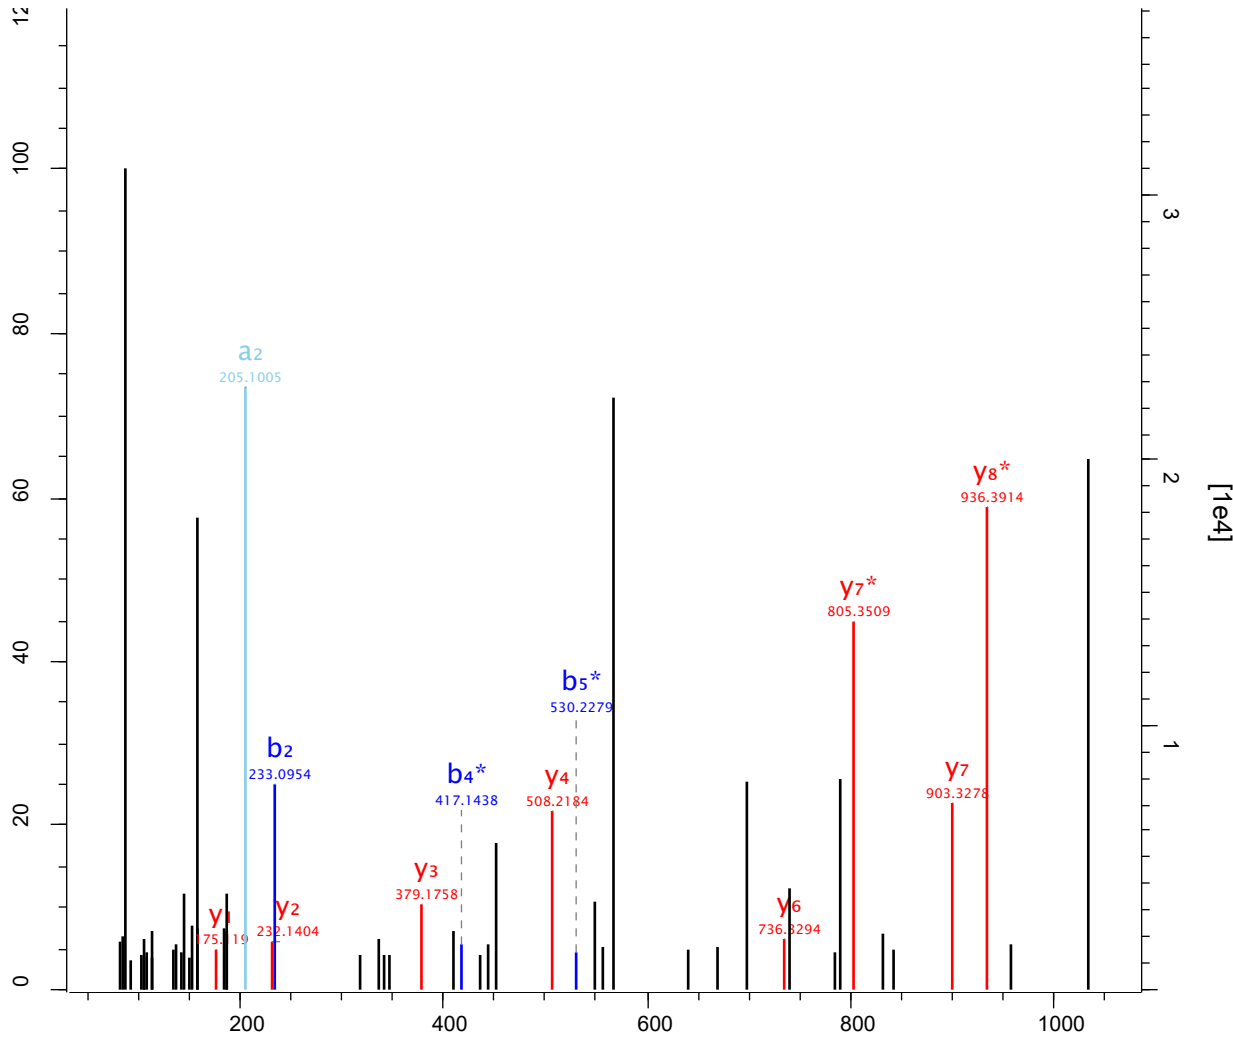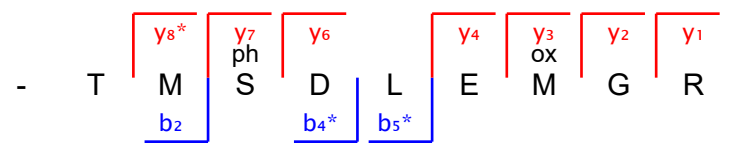

Raw file Scan Method Score m/z  
 sys\_15\_3 14088 FTMS; HCD 71.18 551.75

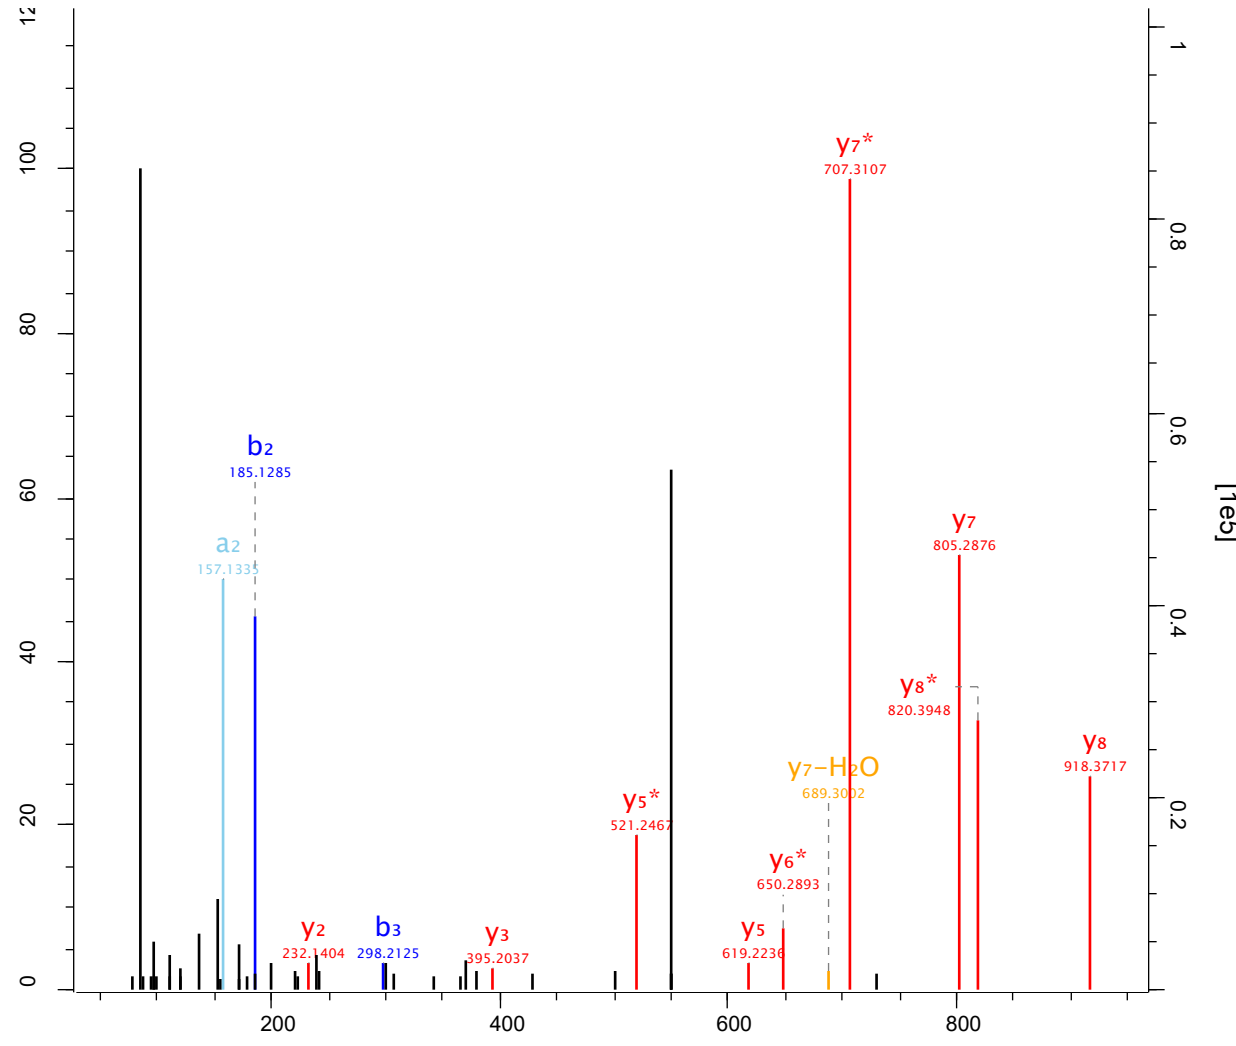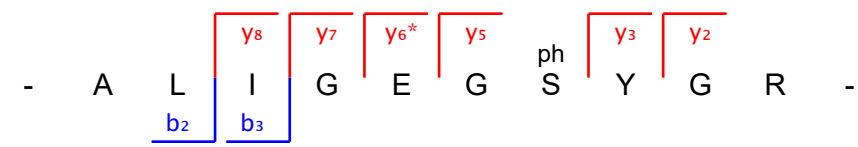

Raw file Scan Method Score m/z  
 sys\_15\_3 14270 FTMS; HCD 42.98 521.22

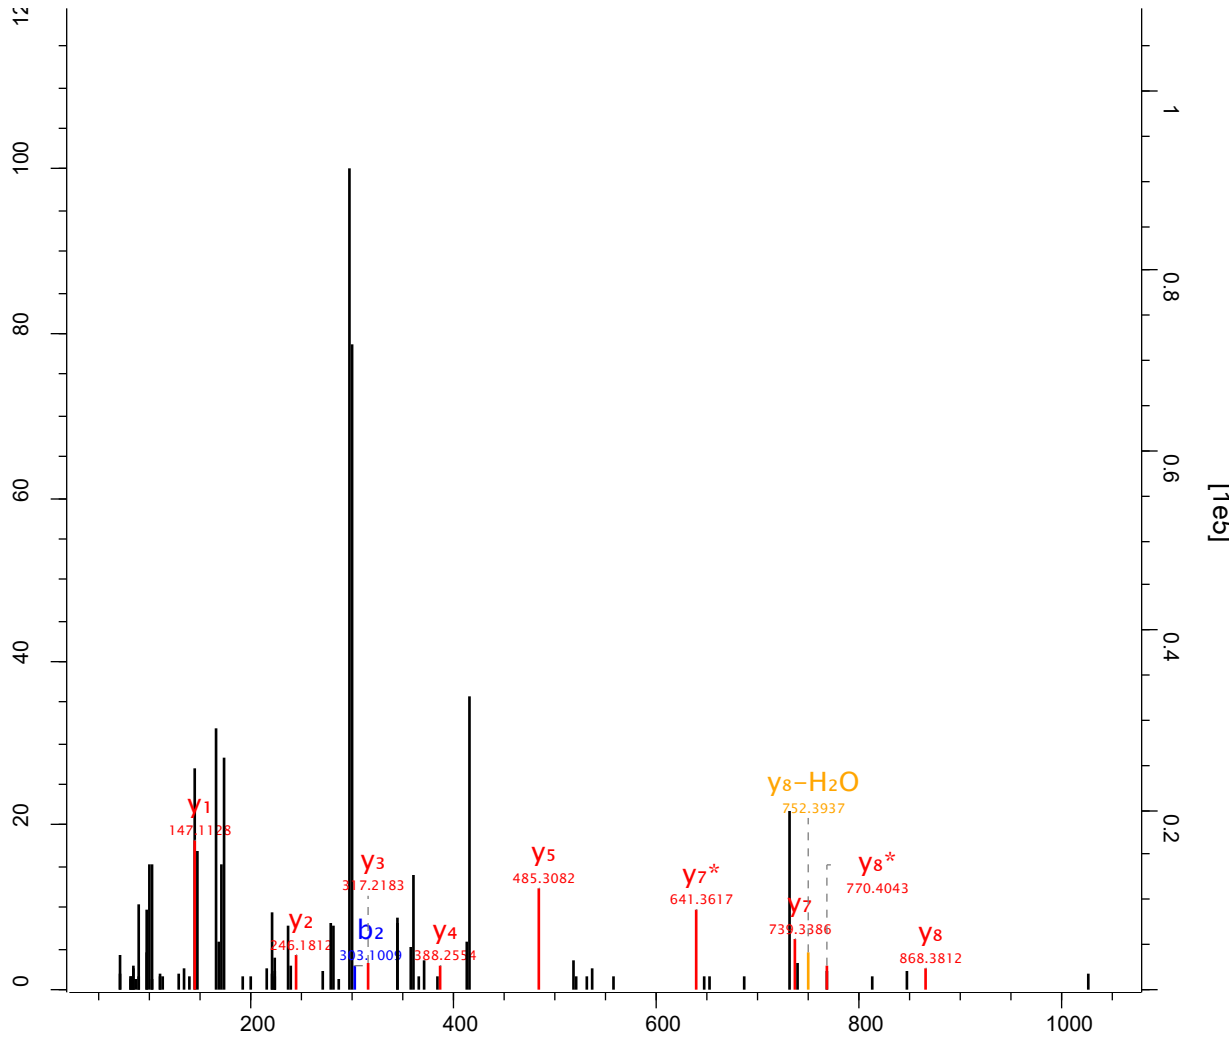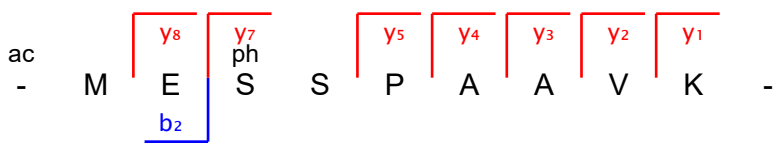



Raw file Scan Method Score m/z  
 sys\_15\_3 14303 FTMS; HCD 119.62 437.2

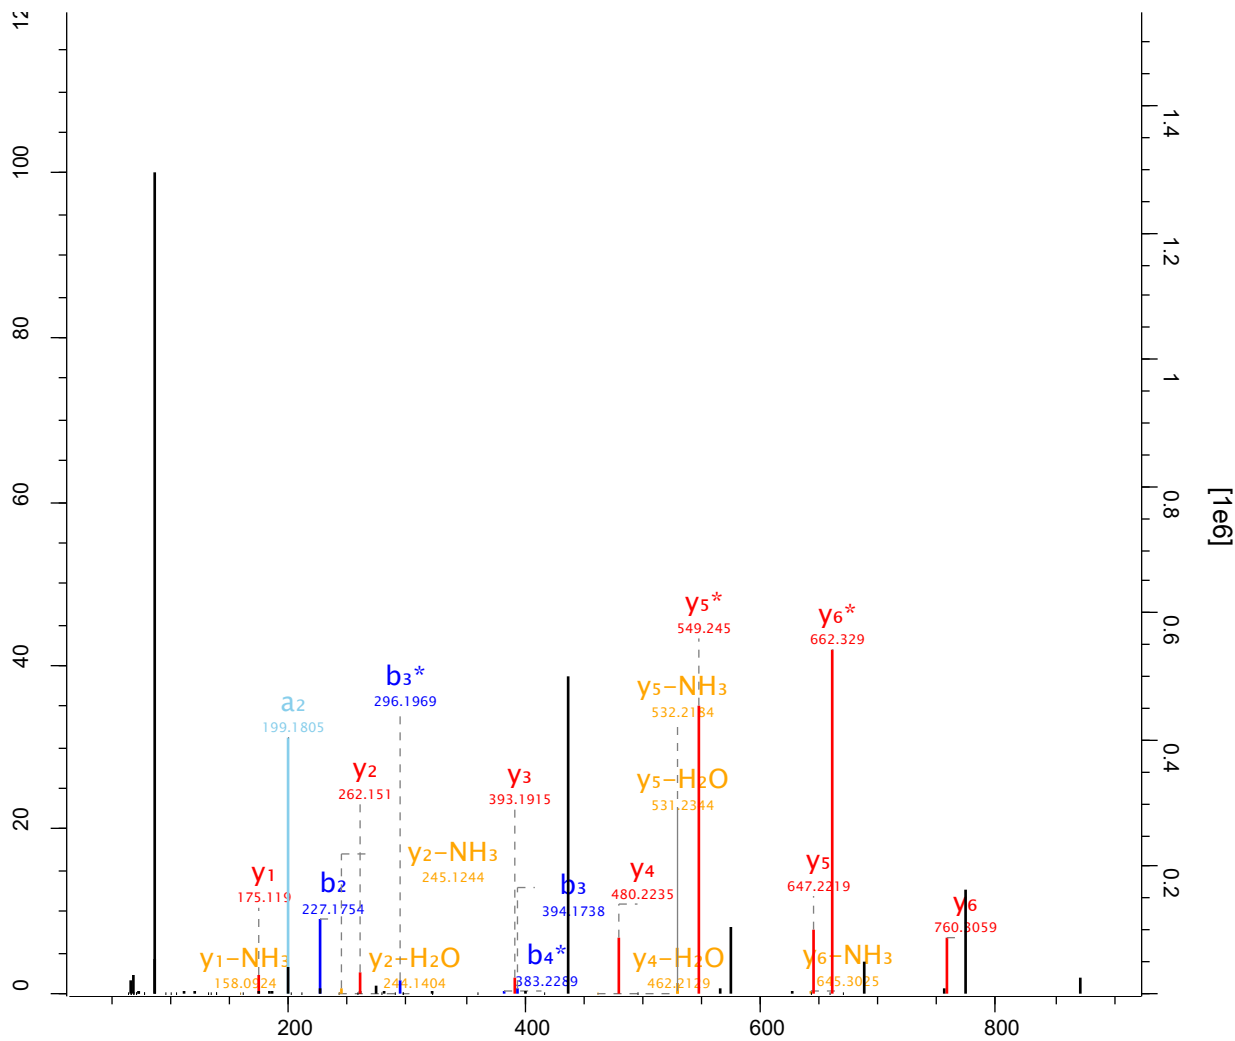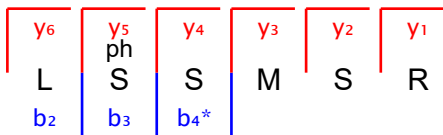

Raw file Scan Method Score m/z  
 sys\_15\_3 15358 FTMS; HCD 69.72 542.78

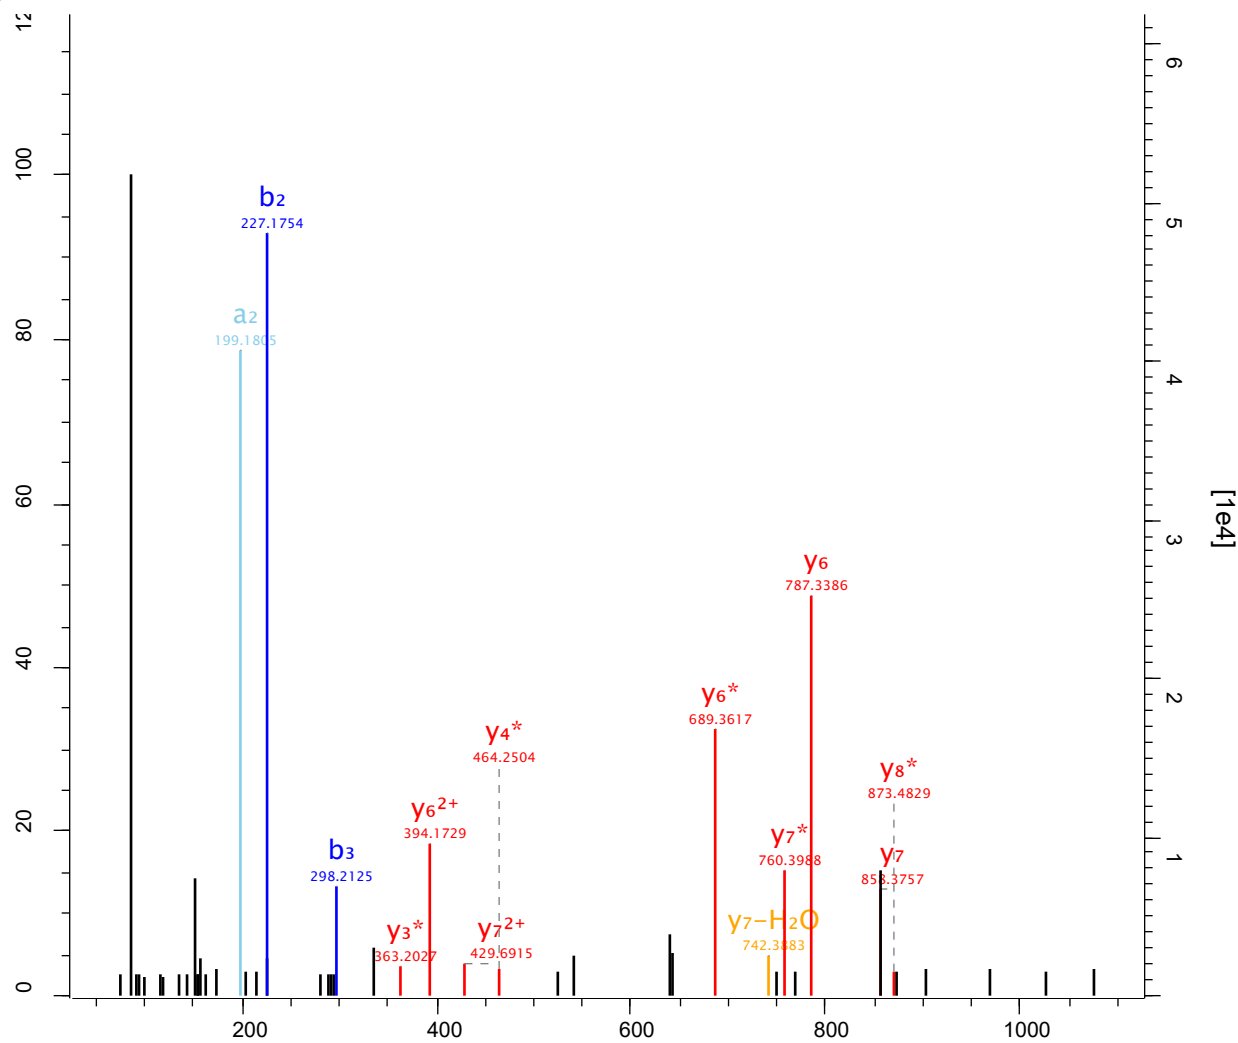

- I L A P Q T S F K -  
 b2 b3 y8\* y7 y6 y4\* y3\* ph

Raw file Scan Method Score m/z  
 sys\_15\_3 17757 FTMS; HCD 201.15 938.36

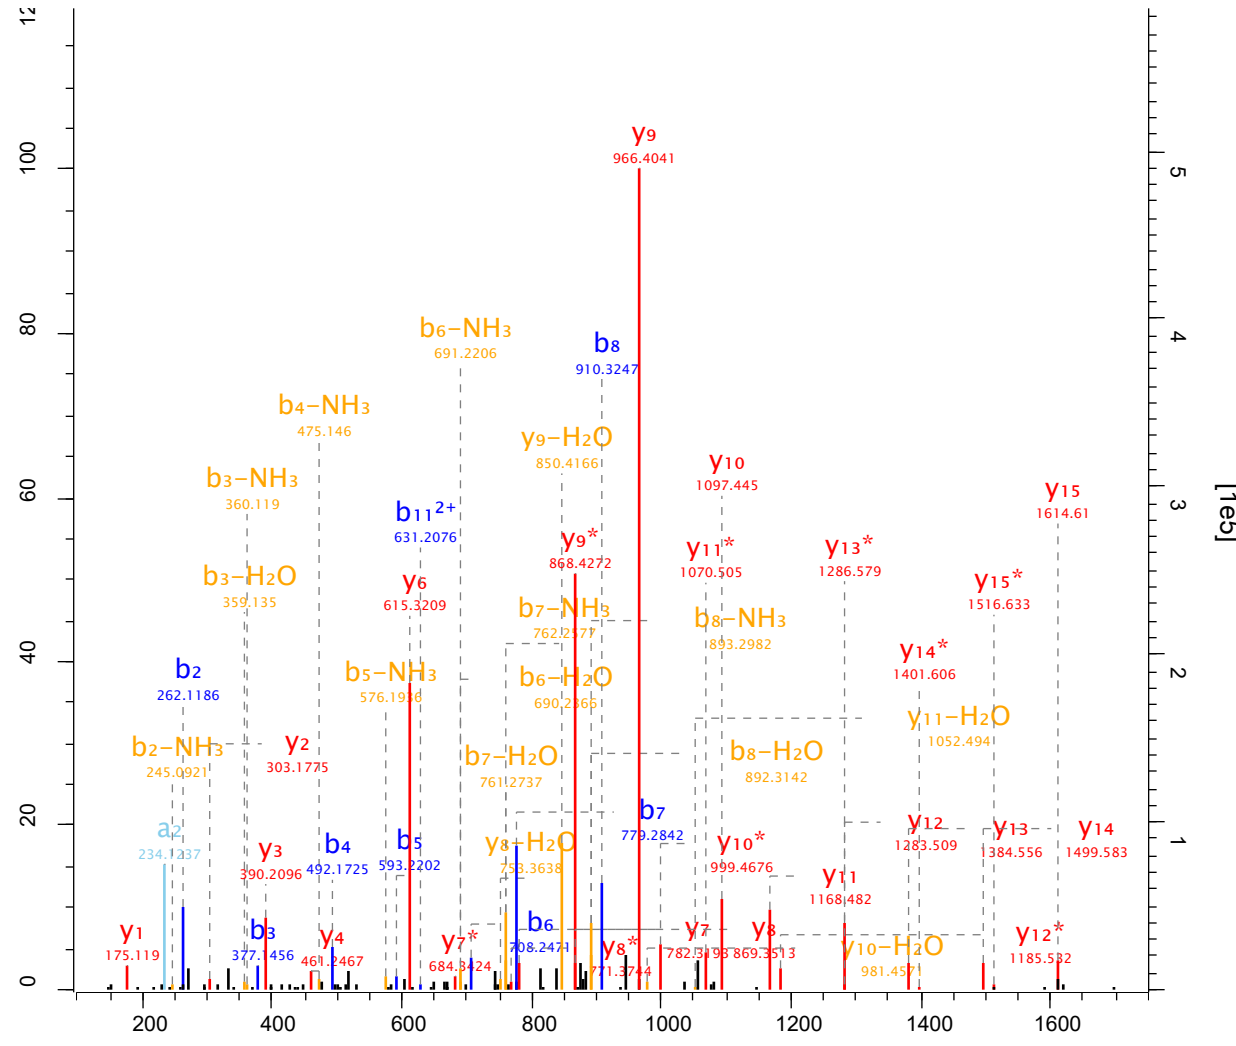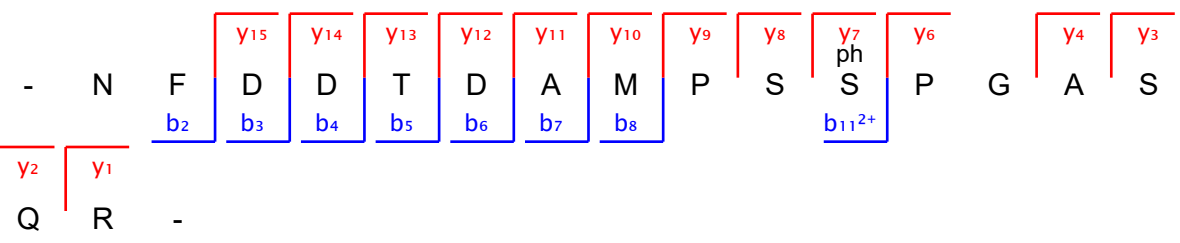

Raw file Scan Method Score m/z  
 sys\_15\_3 17903 FTMS; HCD 45.61 569.27

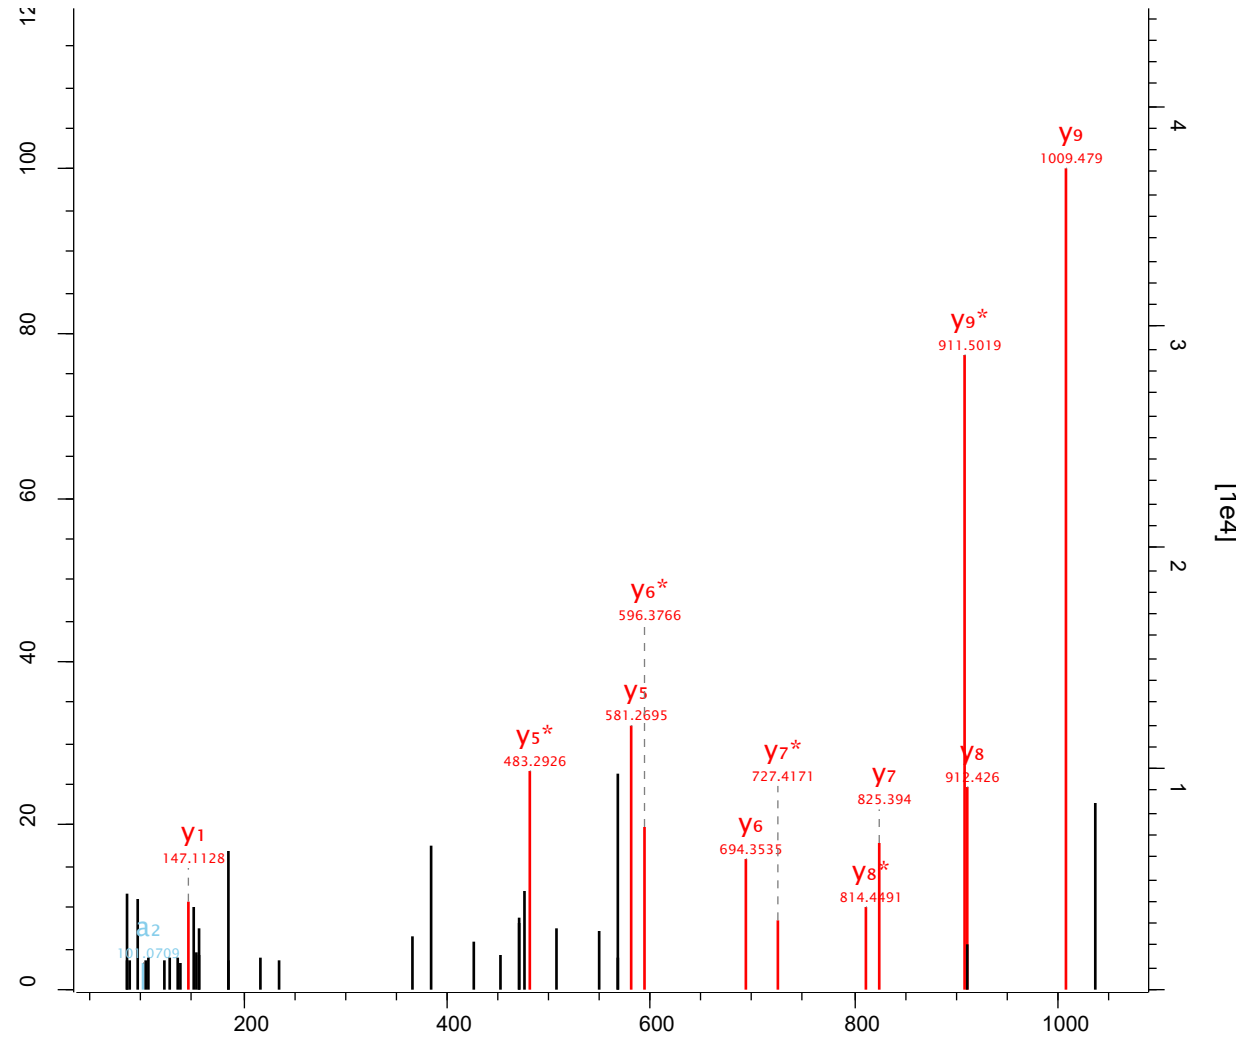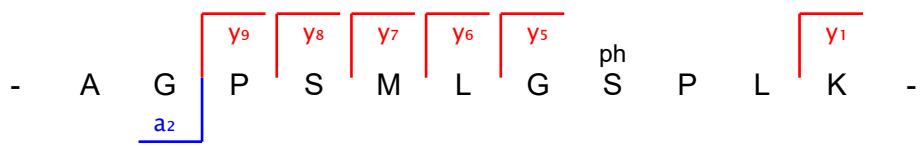

Raw file Scan Method Score m/z  
 sys\_15\_3 19207 FTMS; HCD 87.43 712.83

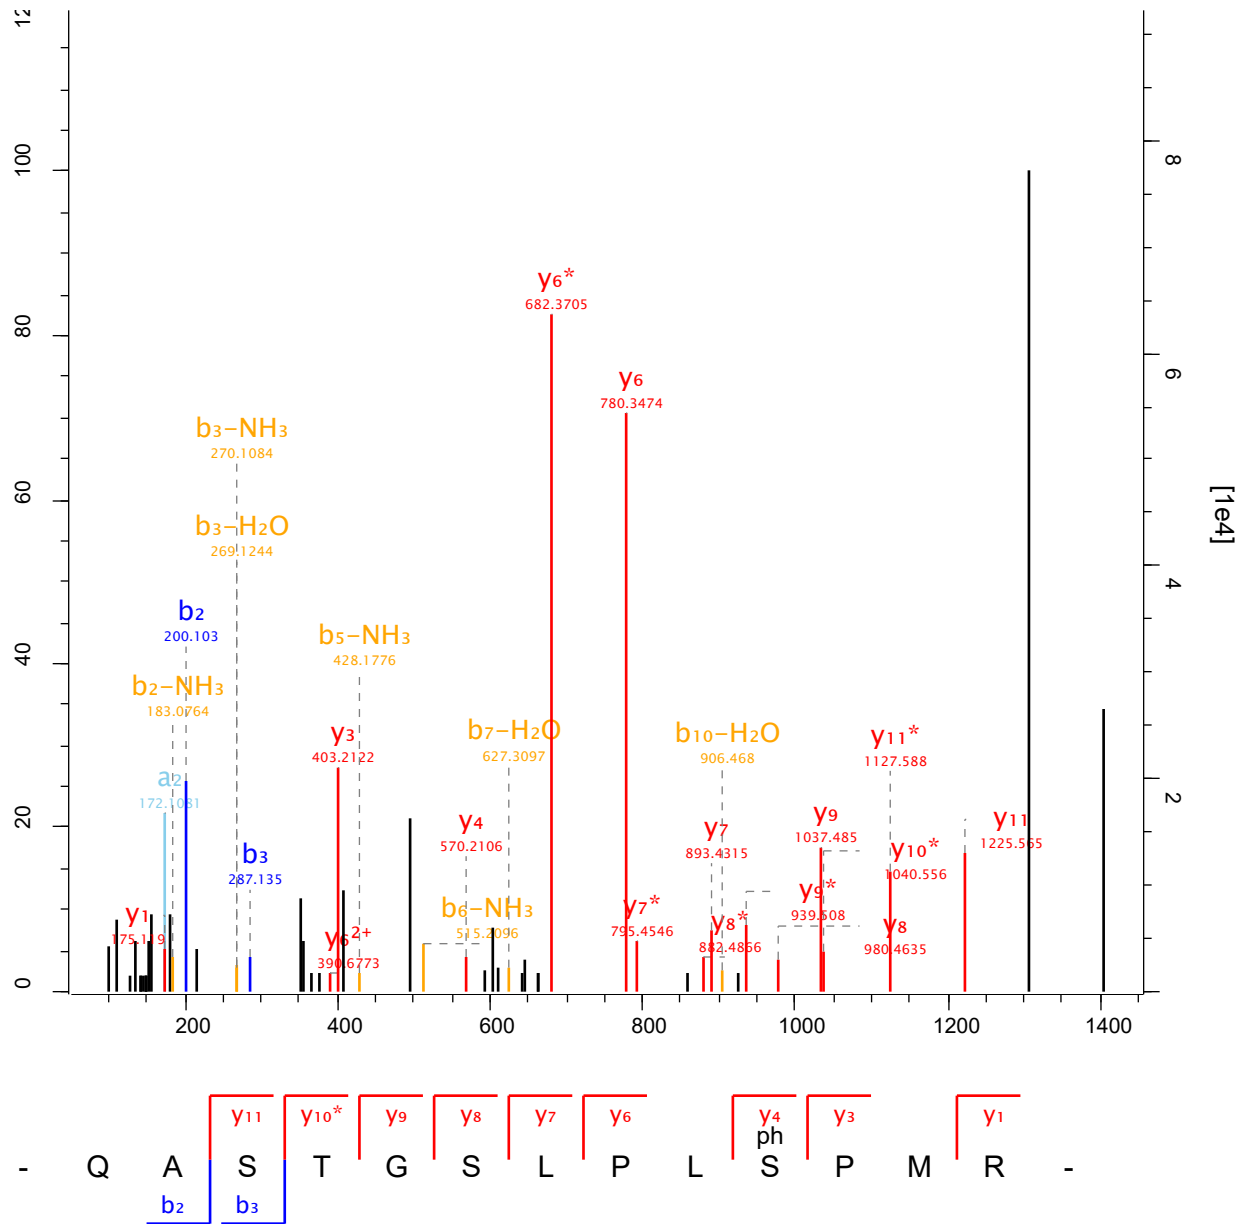

Raw file Scan Method Score m/z  
 sys\_15\_3 21149 FTMS; HCD 75.59 671.27

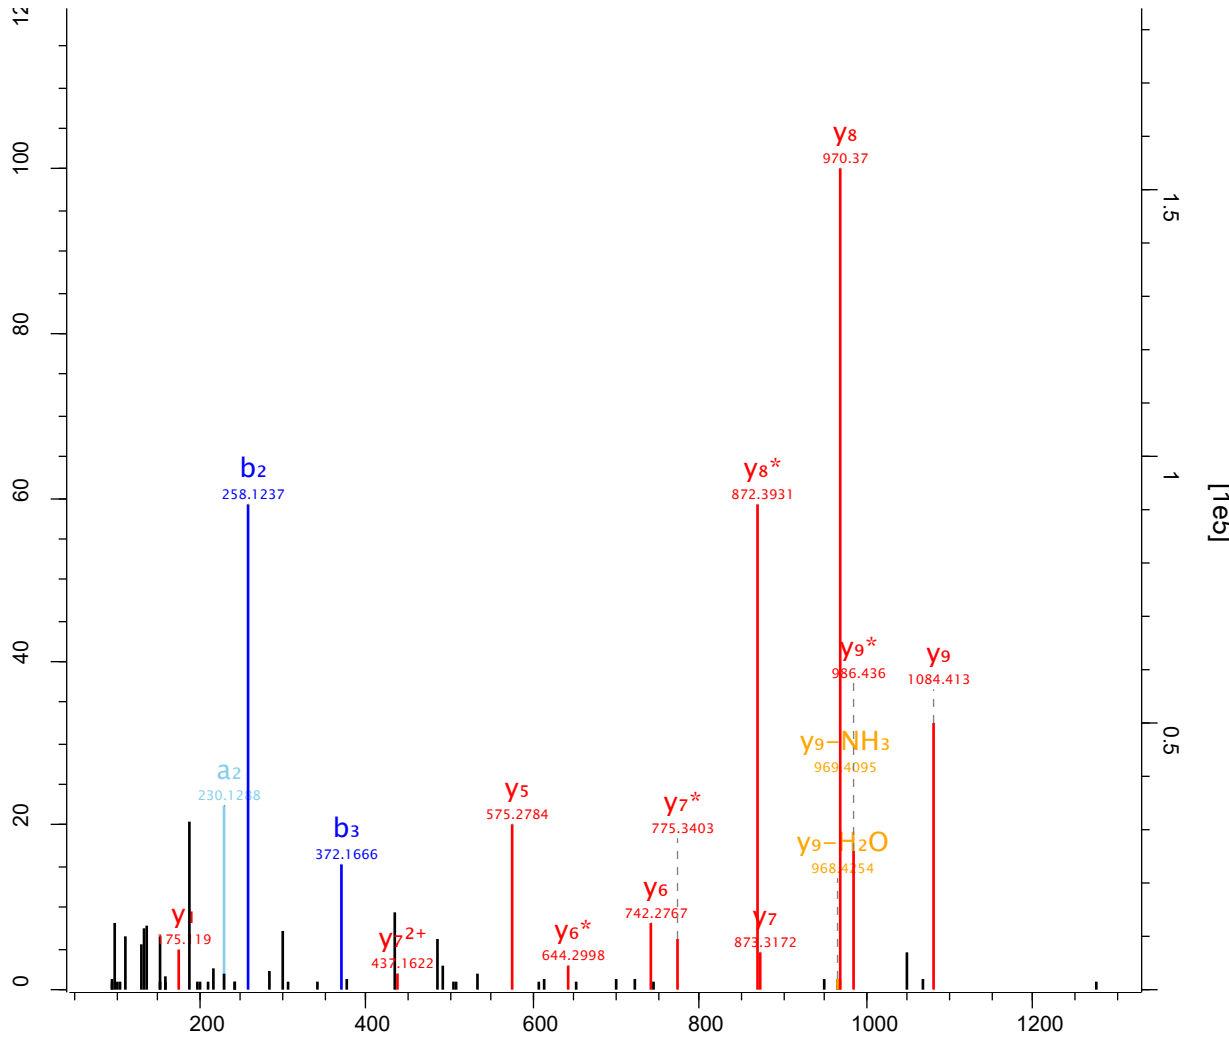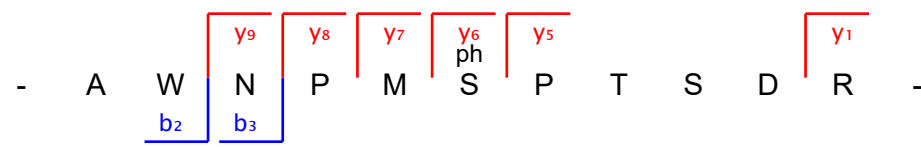

Raw file Scan Method Score m/z  
 sys\_15\_3 35303 FTMS; HCD 81.81 969.39

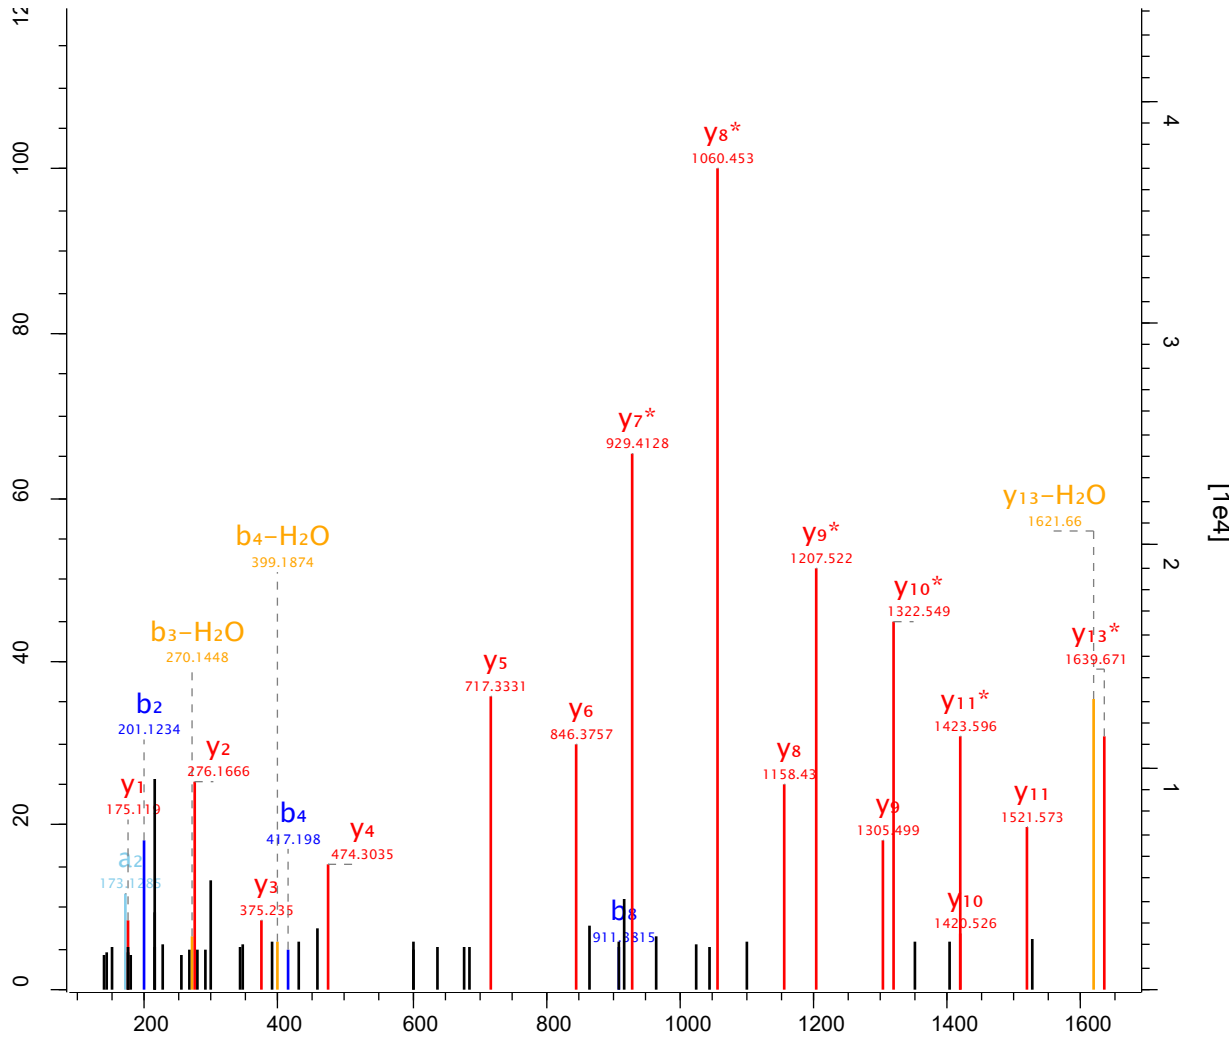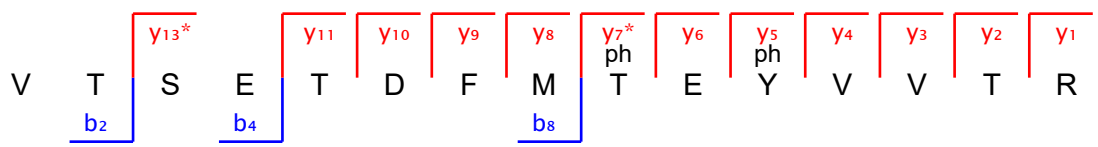

Raw file Scan Method Score m/z  
 sys\_15\_3 5952 FTMS; HCD 62.34 529.74

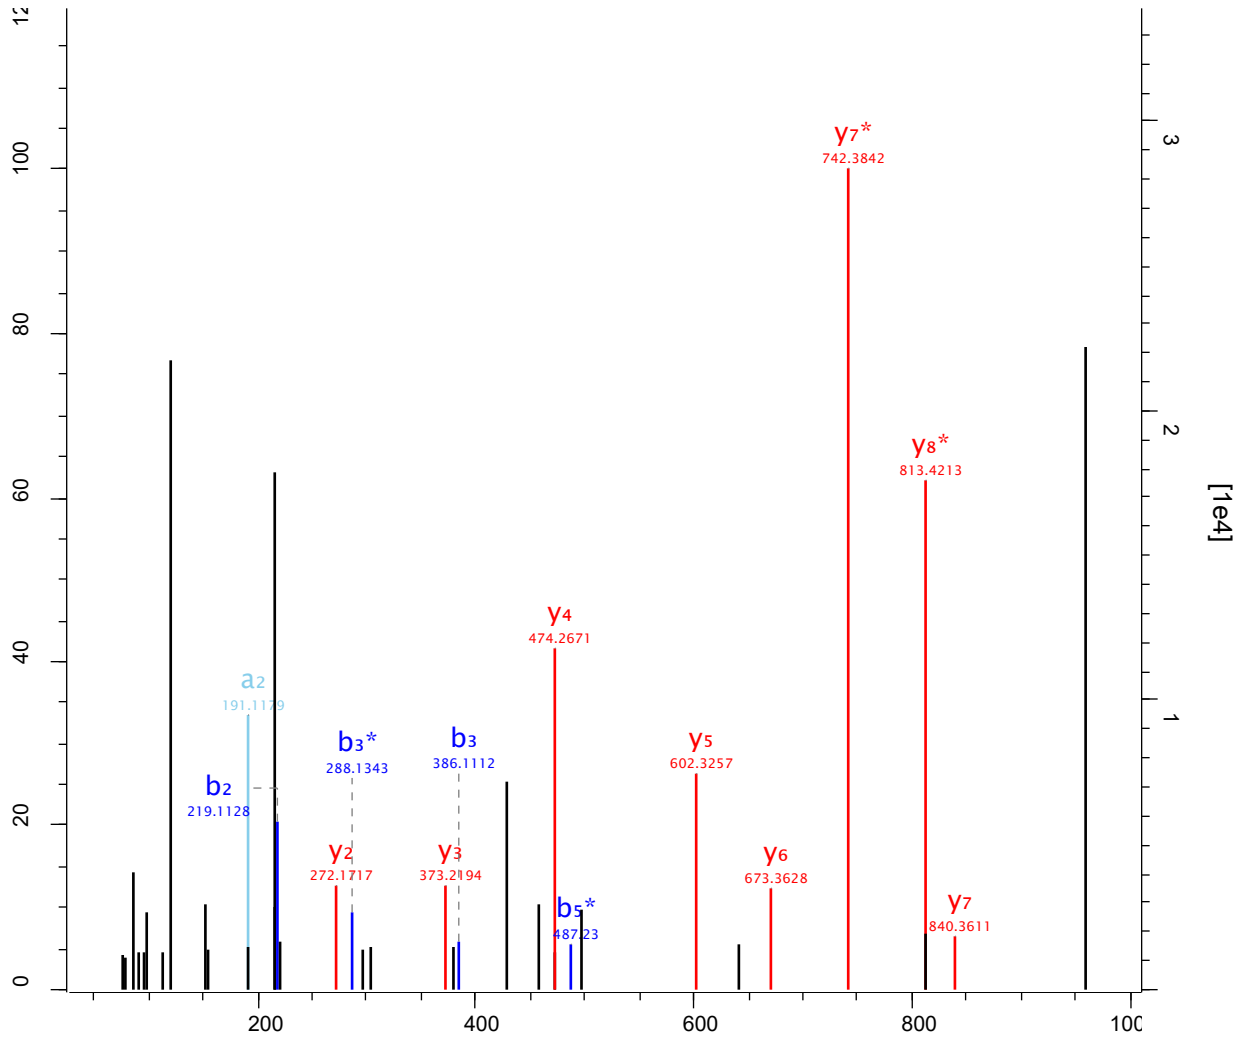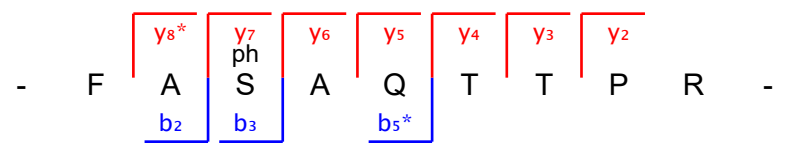



Raw file Scan Method Score m/z  
 sys\_15\_3 7075 FTMS; HCD 63.69 515.23

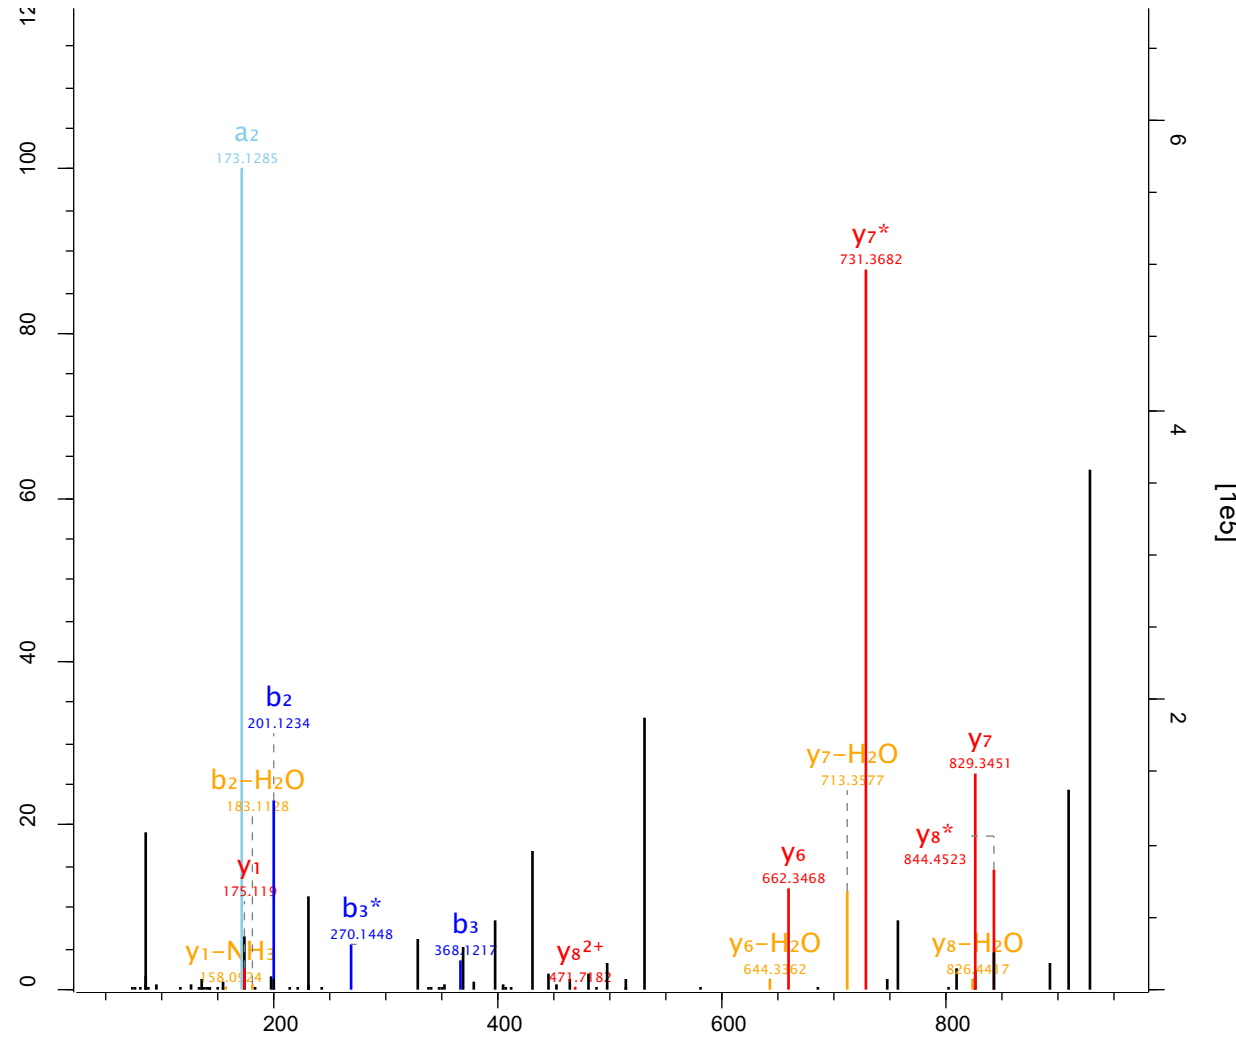

- S I S L S E A R -

Fragmentation mapping:  
 - I: y<sub>8</sub><sup>\*</sup> (top), b<sub>2</sub> (bottom)  
 - S: y<sub>7</sub> ph (top), b<sub>3</sub> (bottom)  
 - S: y<sub>6</sub> (top)  
 - A: y<sub>1</sub> (top)

| Raw file | Scan | Method    | Score | m/z    |
|----------|------|-----------|-------|--------|
| sys_15_3 | 8180 | FTMS; HCD | 93.1  | 525.21 |

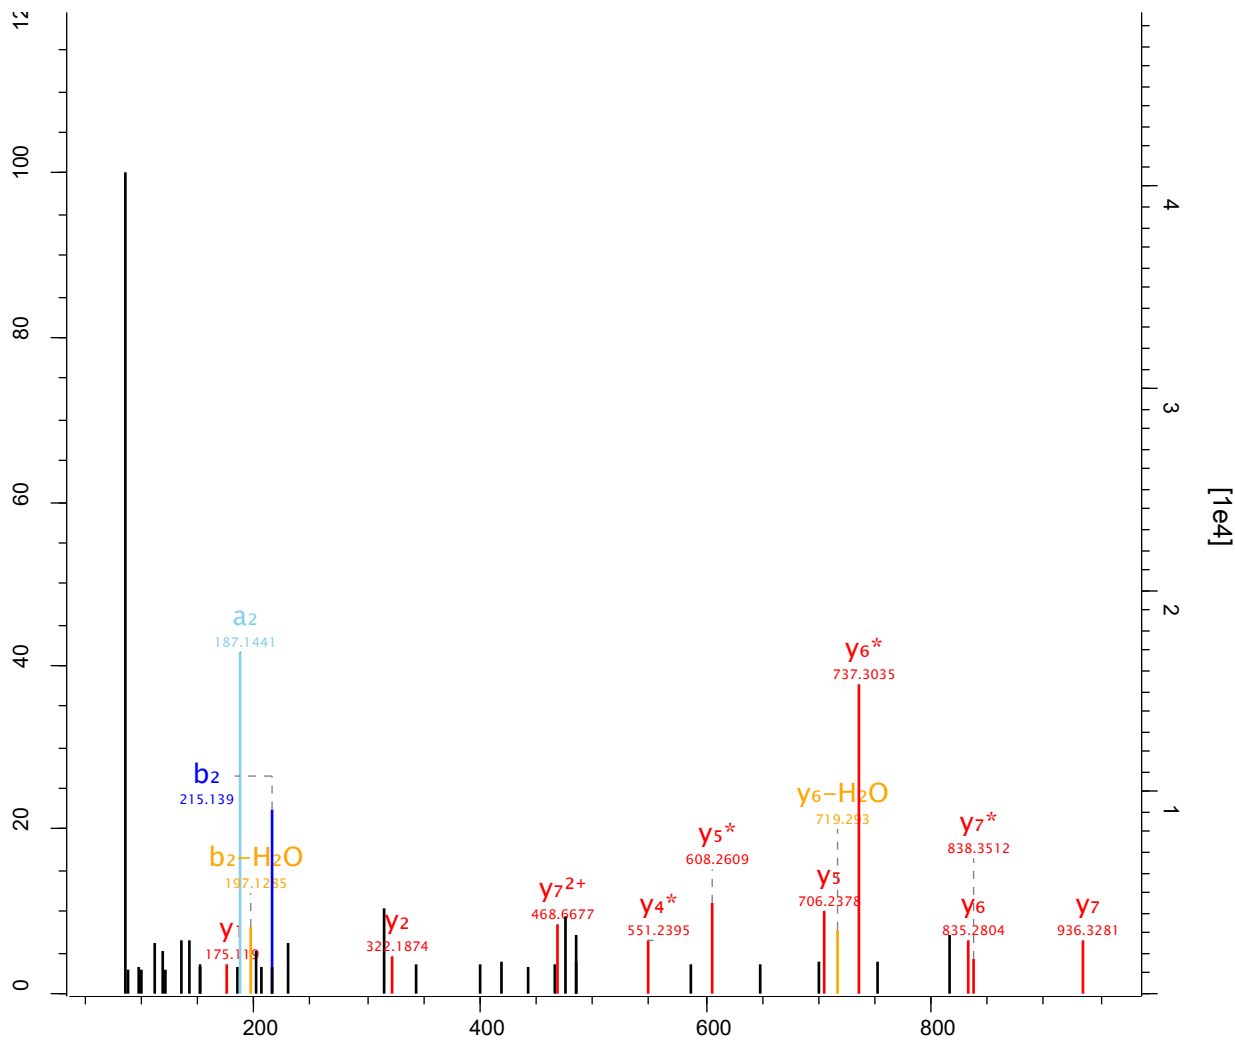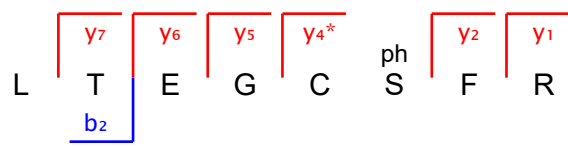

| Raw file | Scan | Method    | Score | m/z    |
|----------|------|-----------|-------|--------|
| sys_15_3 | 8618 | FTMS; HCD | 99.82 | 486.23 |

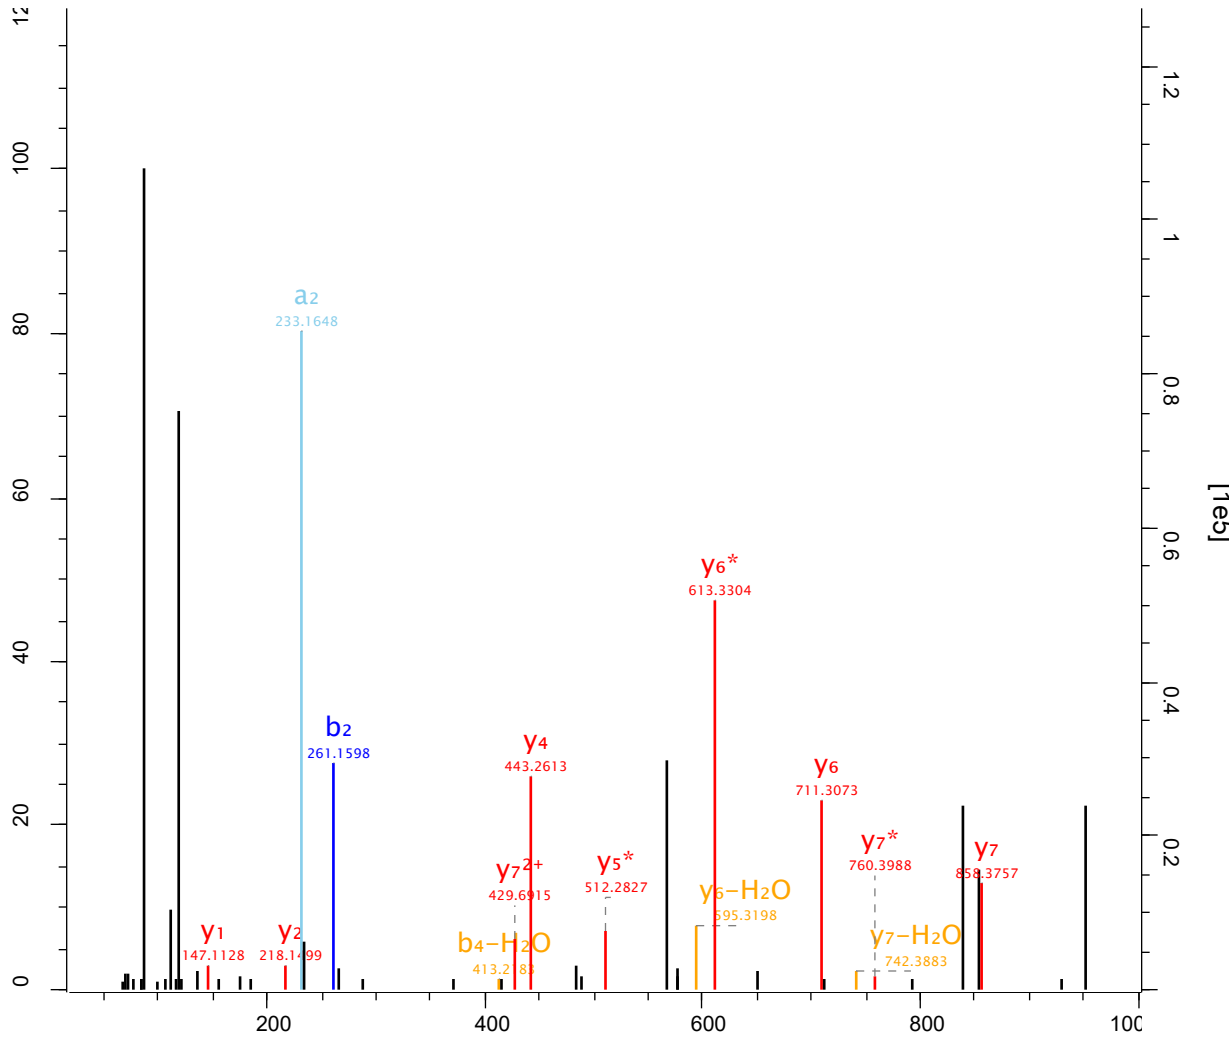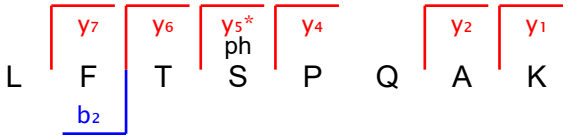

Raw file Scan Method Score m/z  
 sys\_15\_3 9628 FTMS; HCD 160.63 548.28

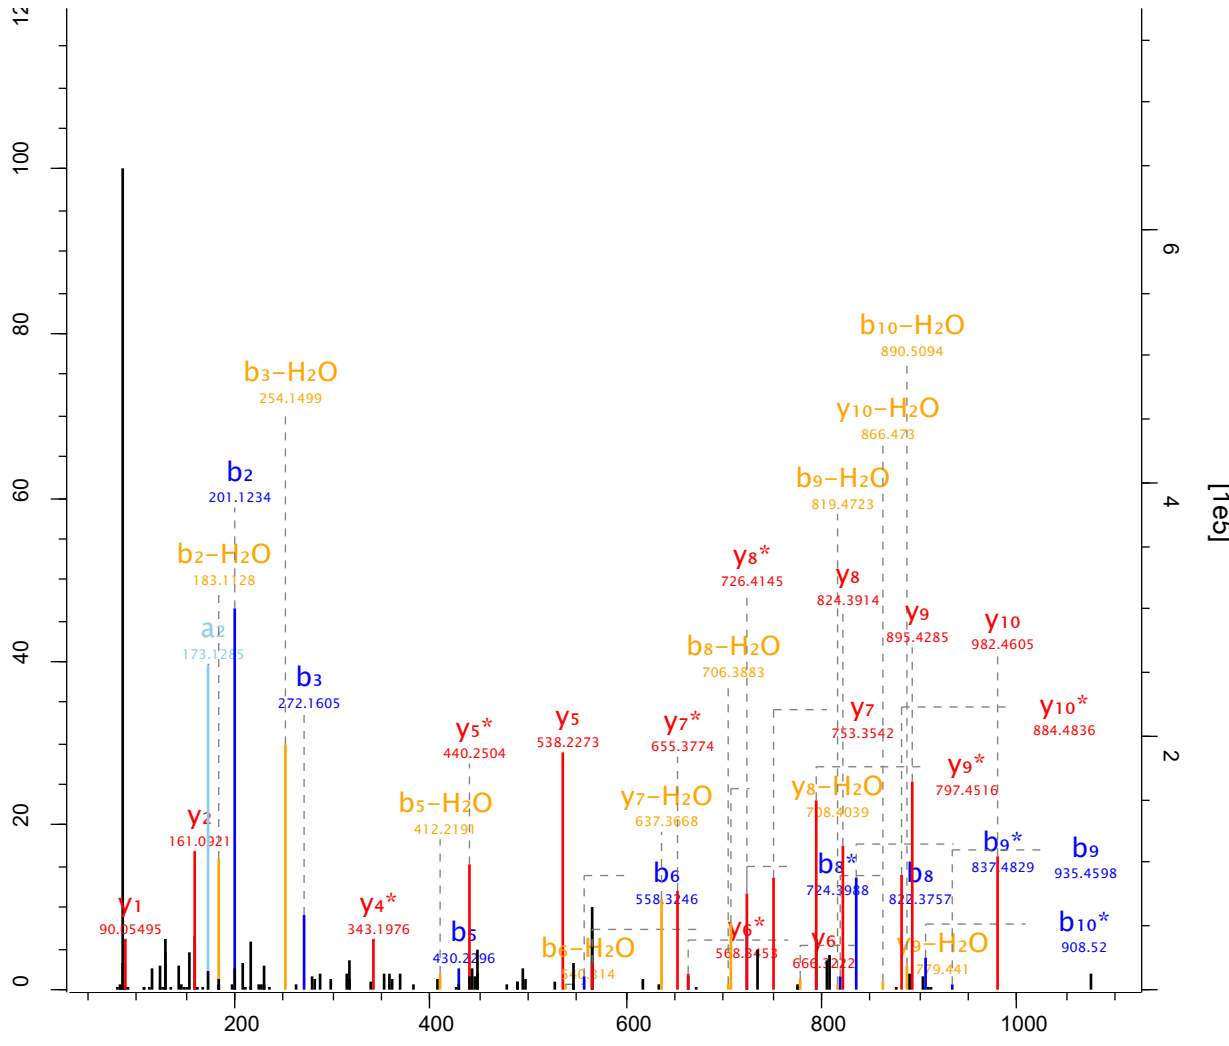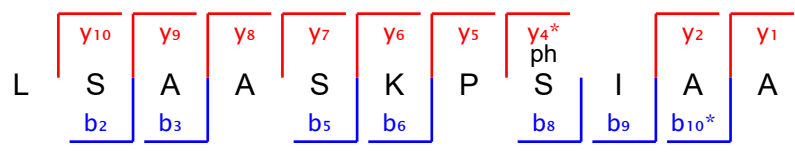

Raw file Scan Method Score m/z  
 sys\_15\_3 9648 FTMS; HCD 69.03 524.21

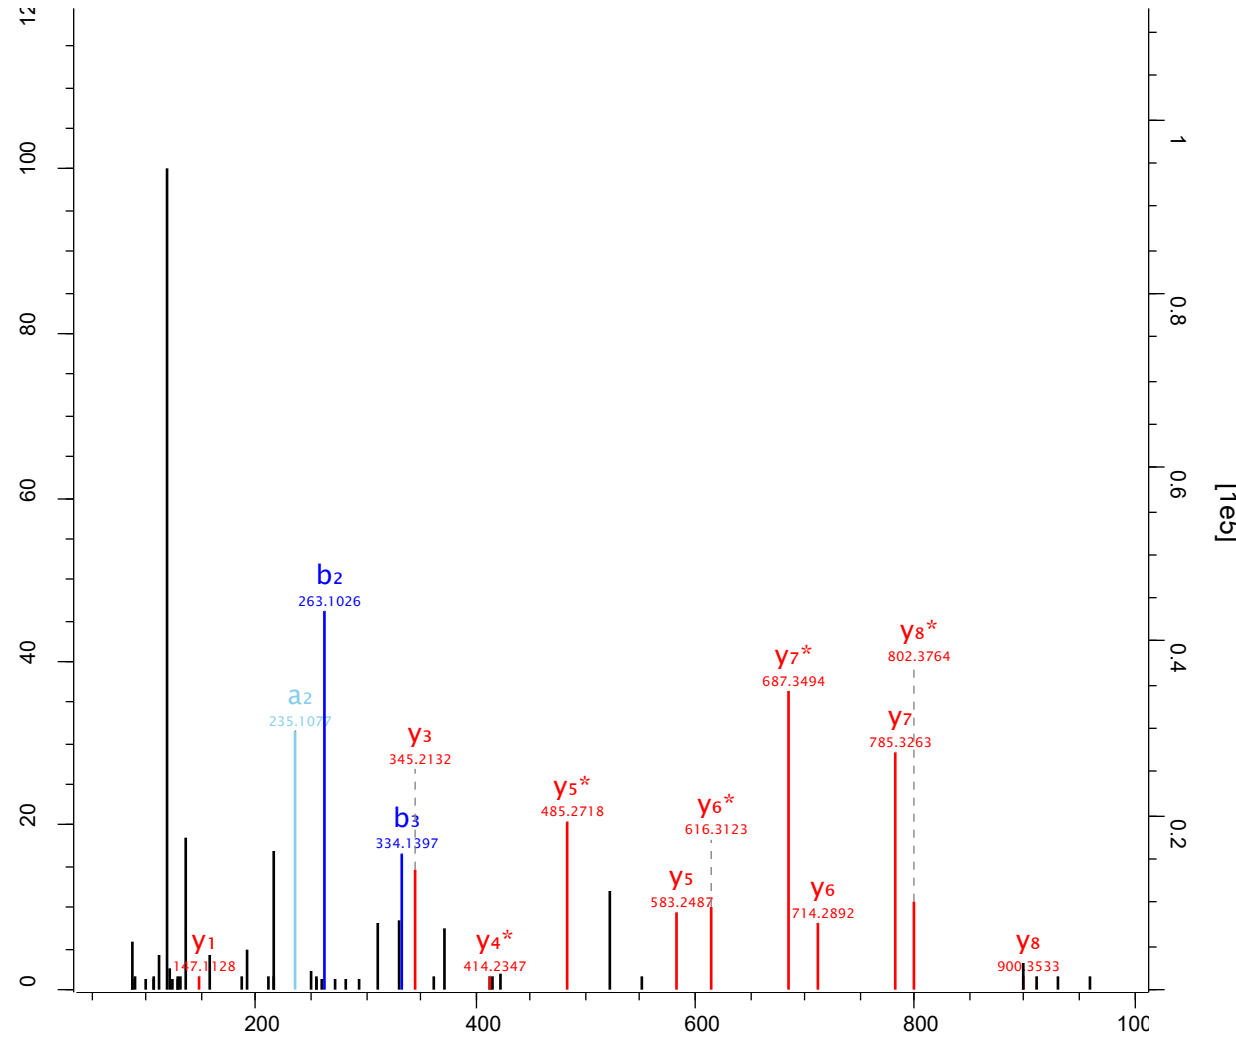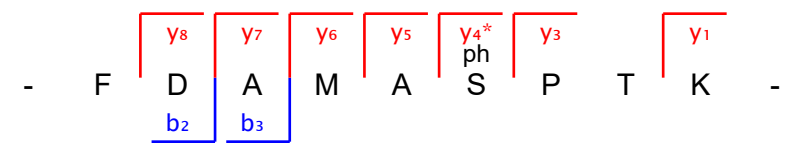

Raw file Scan Method Score m/z  
 sys\_30\_1 14749 FTMS; HCD 120.63 785.82

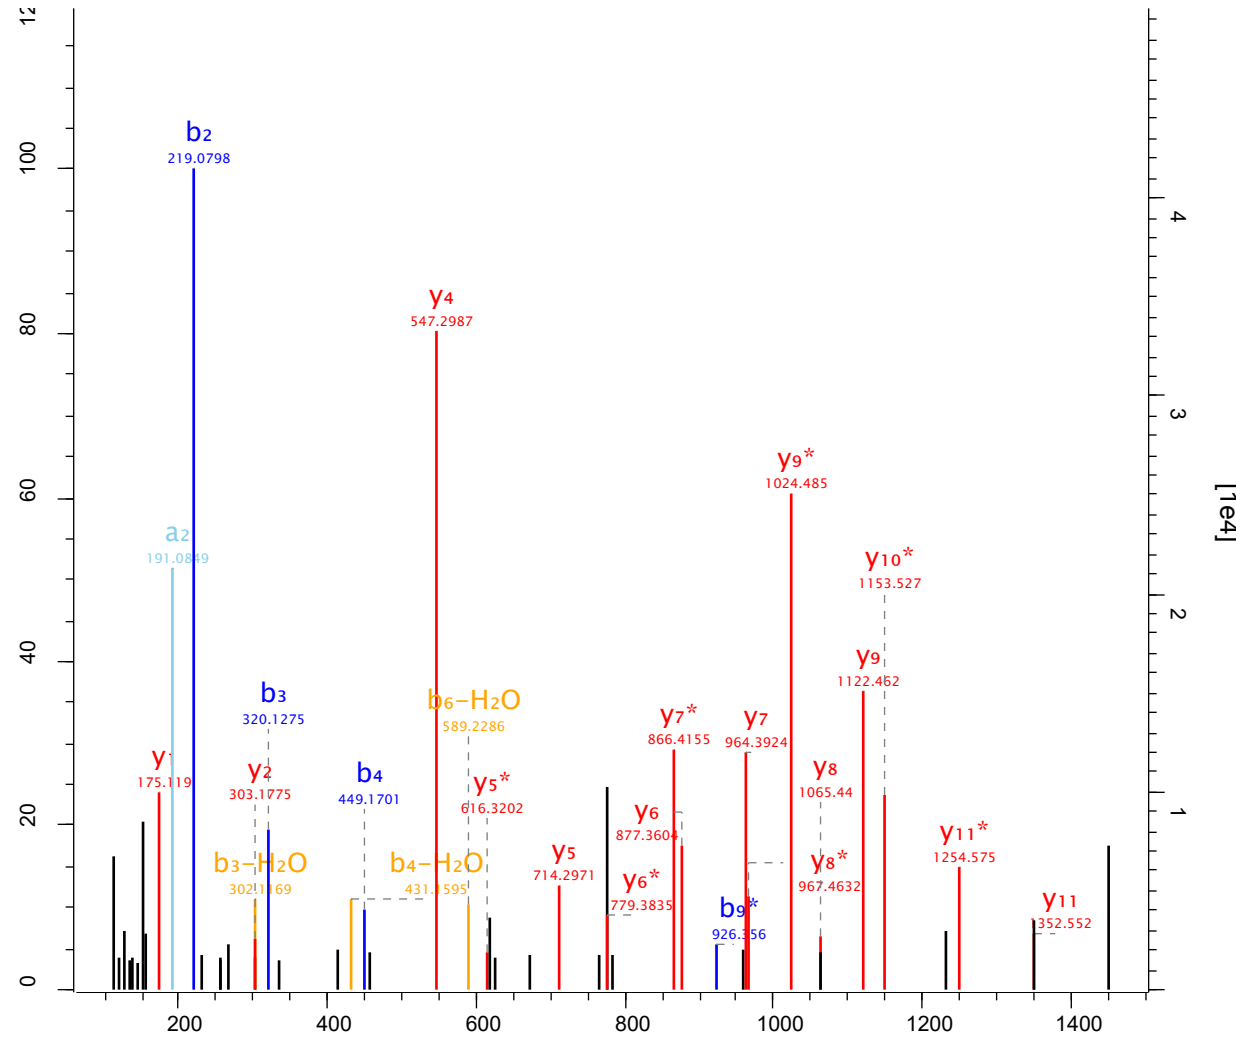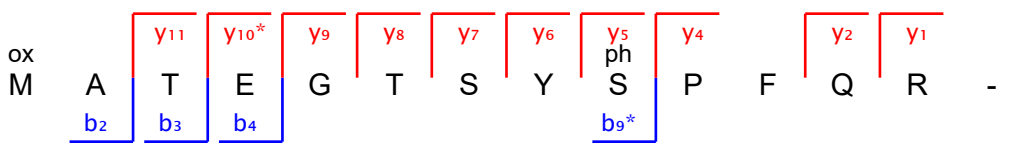

Raw file Scan Method Score m/z  
 sys\_30\_1 16440 FTMS; HCD 139.5 749.81

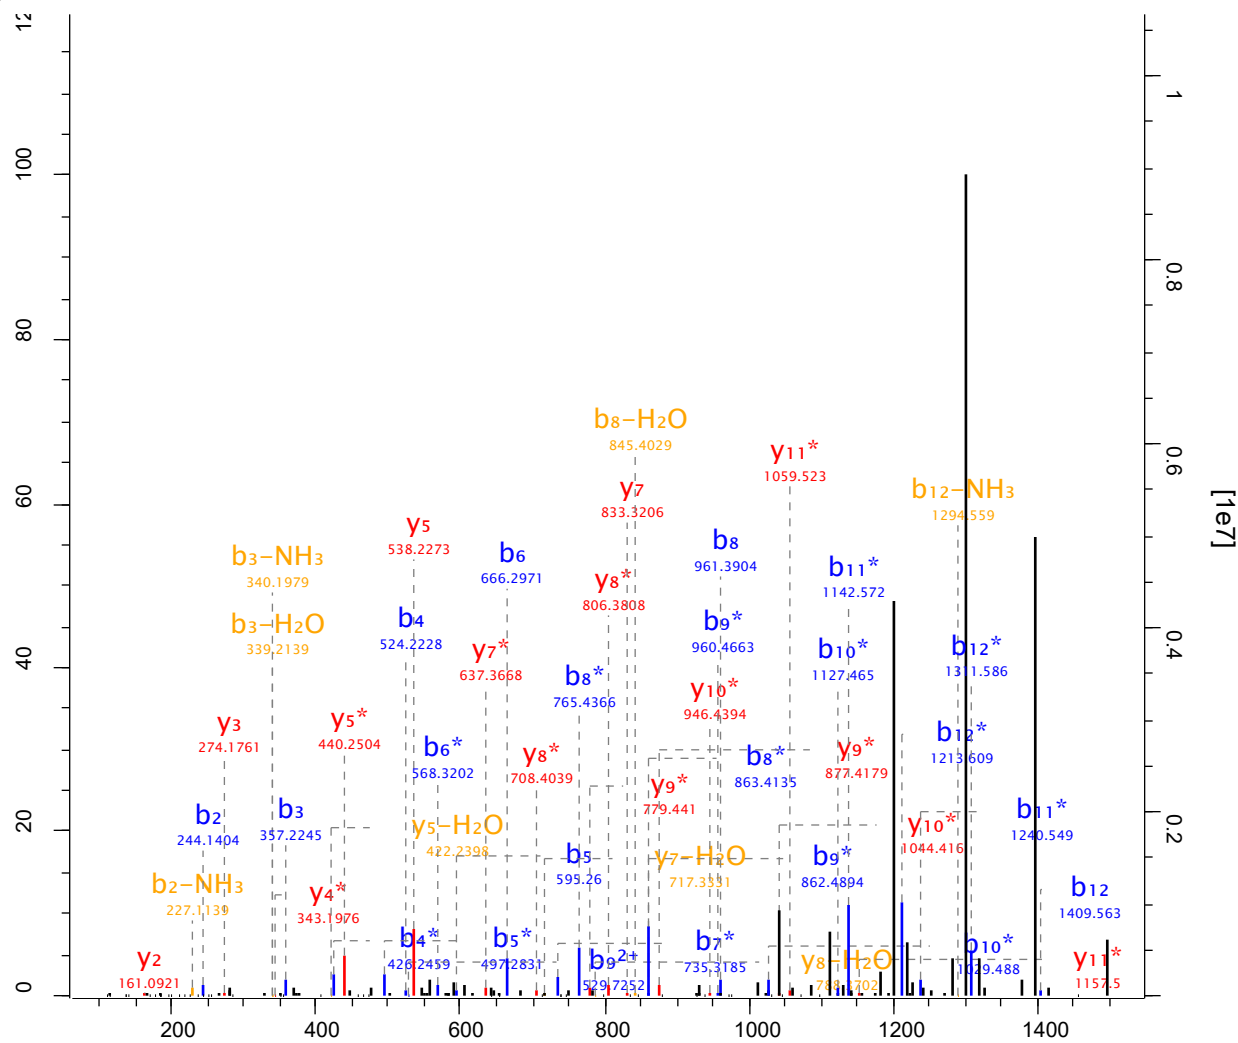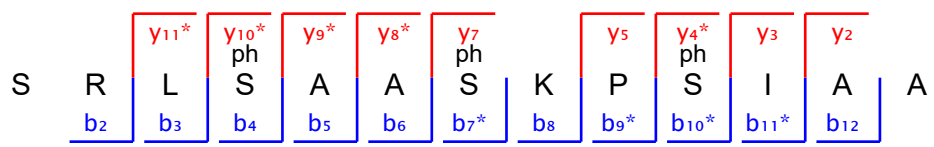

Raw file Scan Method Score m/z  
 sys\_30\_1 26002 FTMS; HCD 126.25 725.8

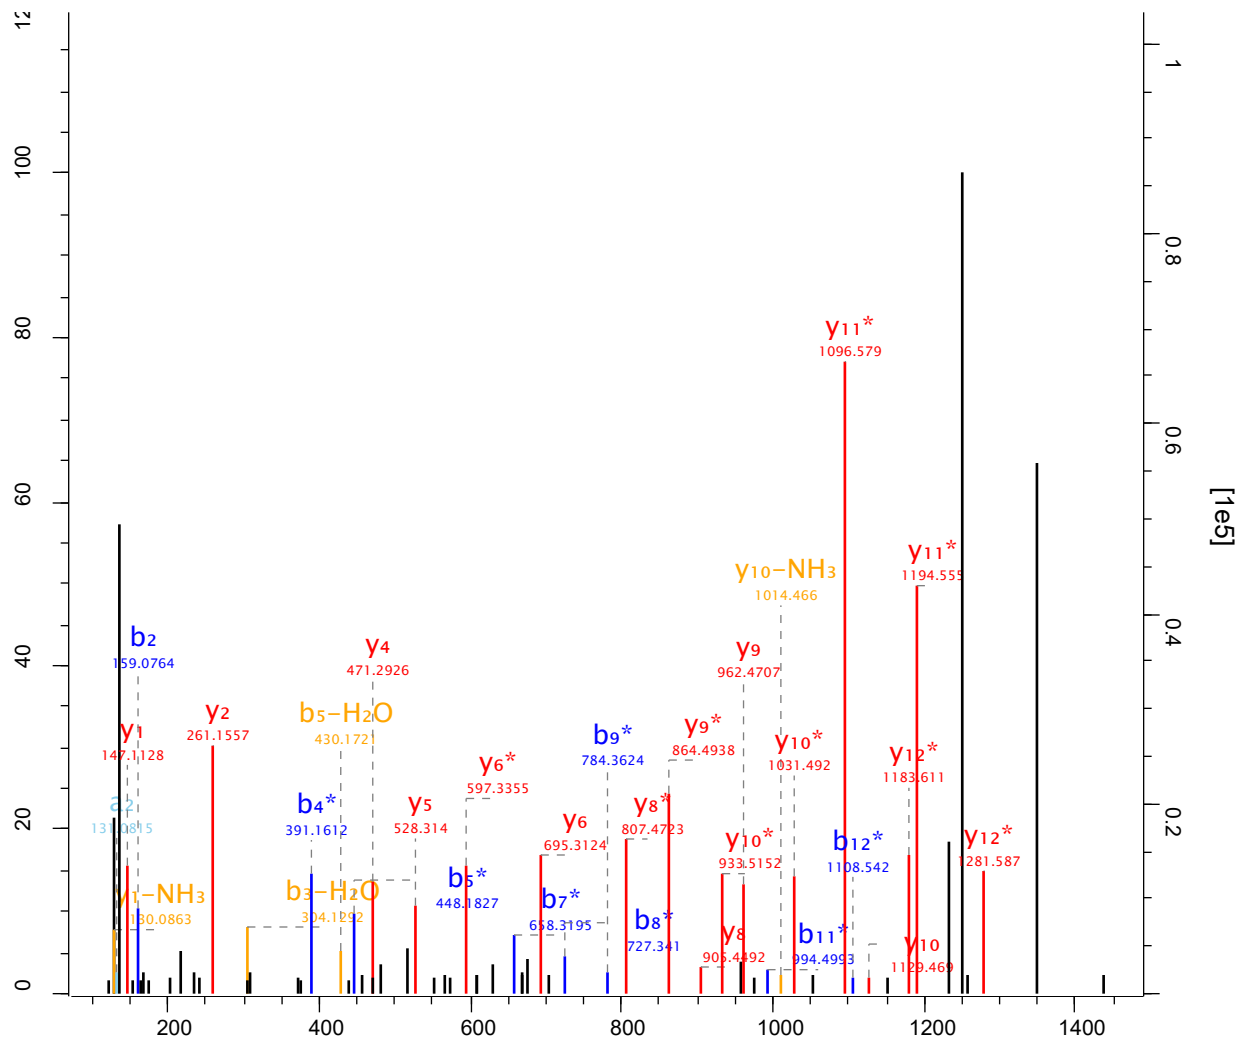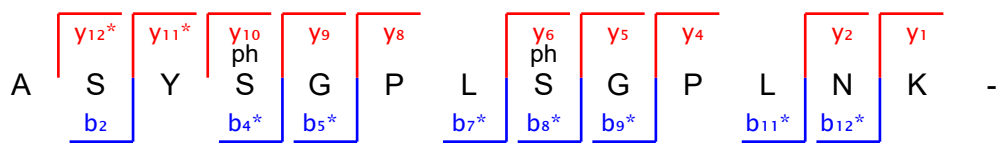



Raw file Scan Method Score m/z  
 sys\_30\_1 36281 FTMS; HCD 141.13 736.32

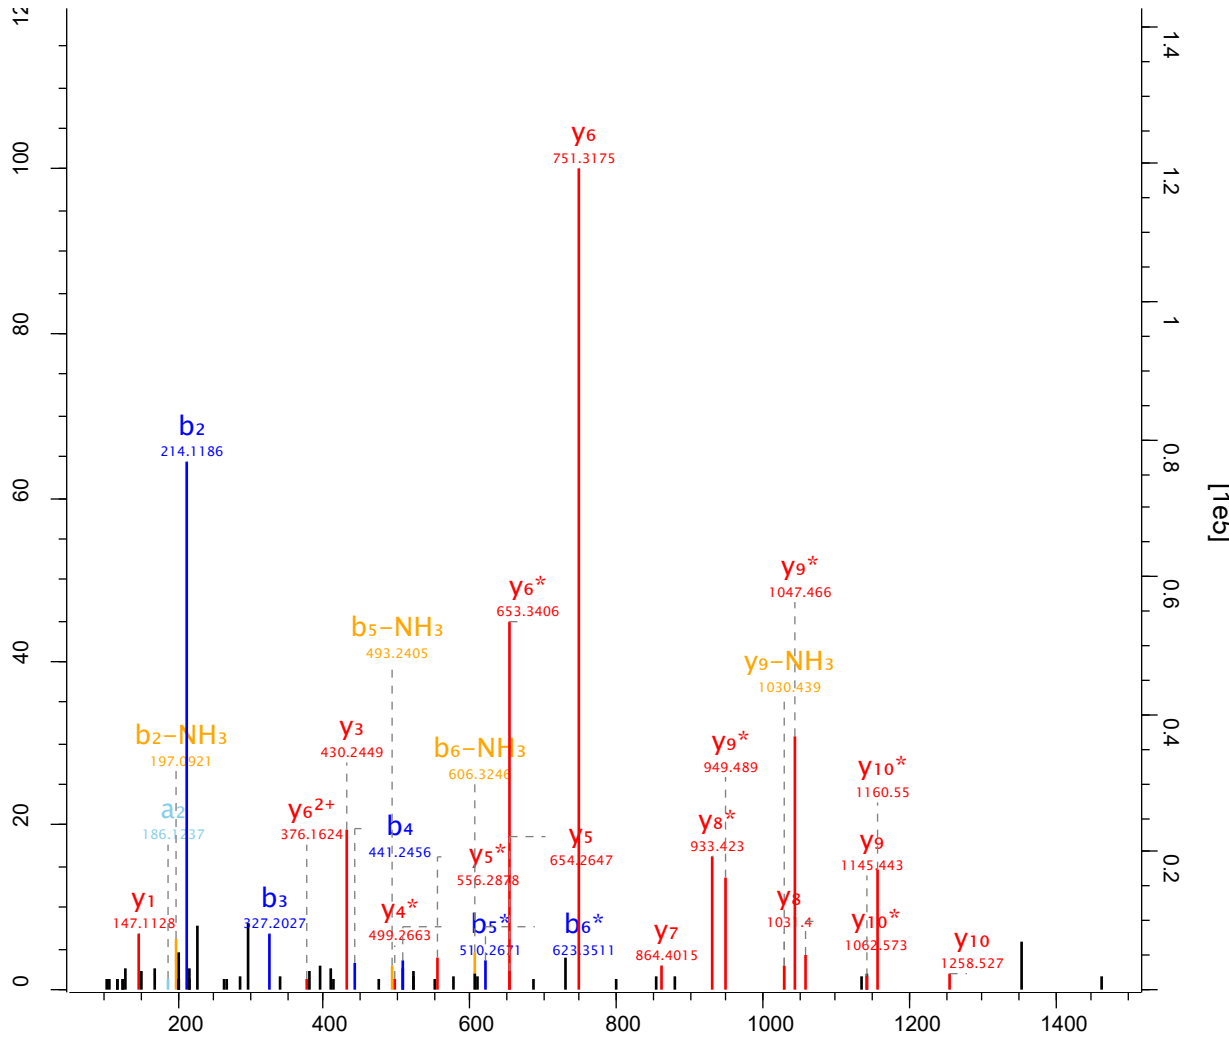

- V N L N S L P G S P W K -

b<sub>2</sub>
b<sub>3</sub>
b<sub>4</sub>
b<sub>5</sub>\*
b<sub>6</sub>\*
y<sub>10</sub>
y<sub>9</sub>
y<sub>8</sub><sup>ph</sup>
y<sub>7</sub>
y<sub>6</sub>
y<sub>5</sub>
y<sub>4</sub><sup>ph</sup>\*
y<sub>3</sub>
y<sub>1</sub>

Raw file Scan Method Score m/z  
 sys\_30\_1 8283 FTMS; HCD 114.97 450.7

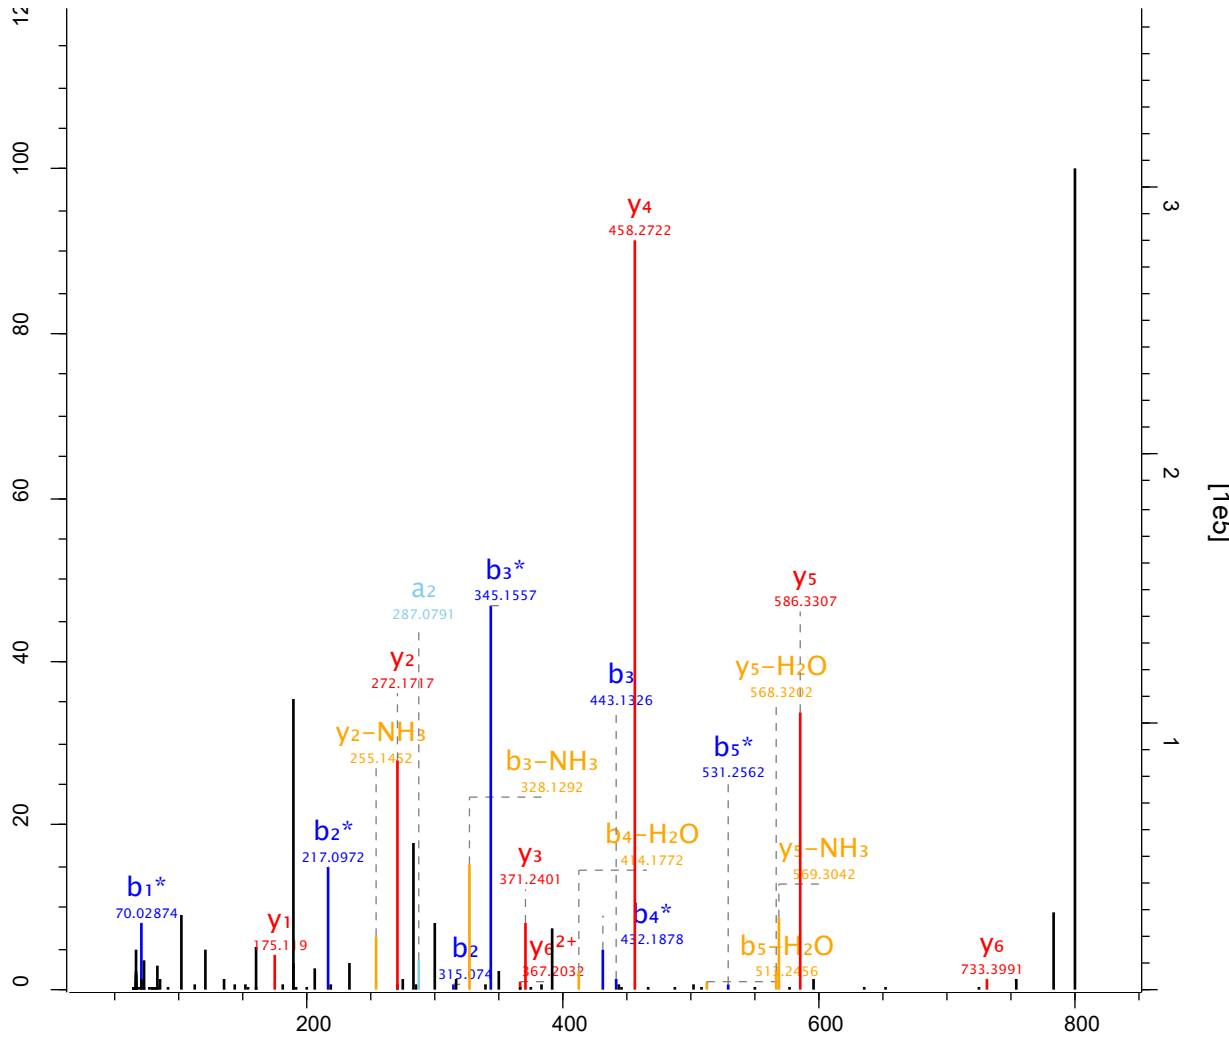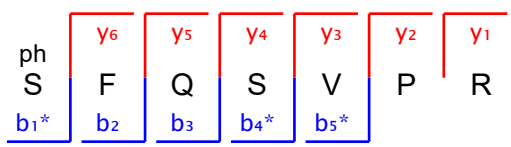

| Raw file | Scan | Method    | Score | m/z    |
|----------|------|-----------|-------|--------|
| sys_30_1 | 8449 | FTMS; HCD | 47.6  | 427.22 |

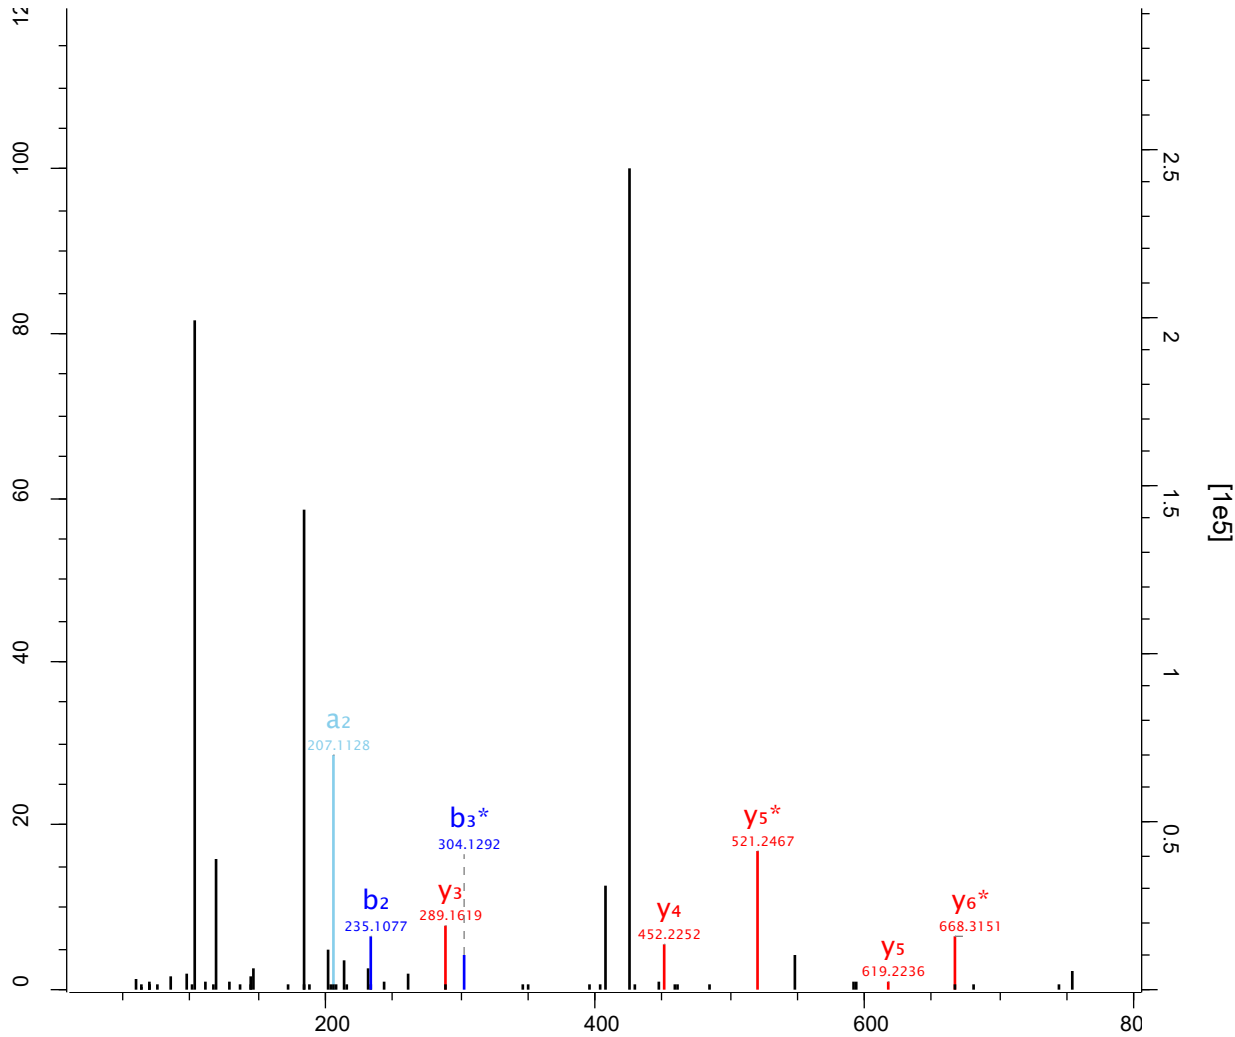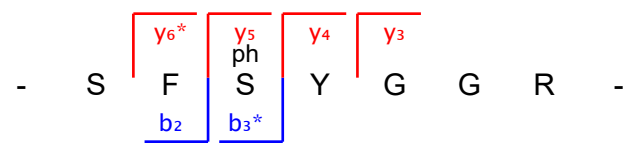

| Raw file | Scan | Method    | Score  | m/z    |
|----------|------|-----------|--------|--------|
| sys_30_1 | 8770 | FTMS; HCD | 153.24 | 441.71 |

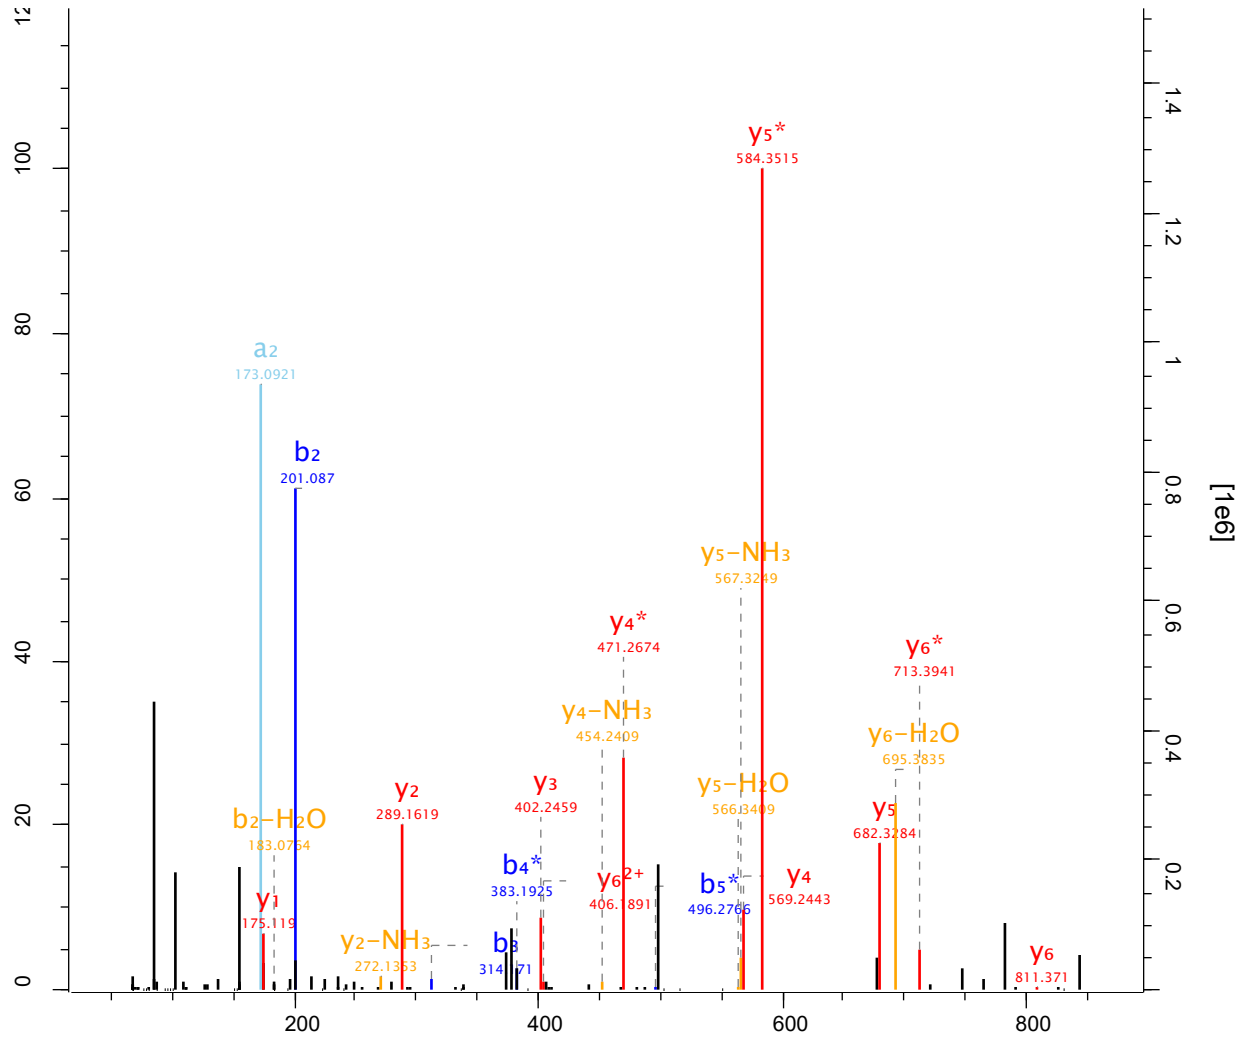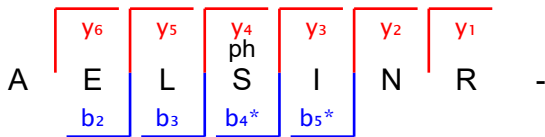

| Raw file | Scan | Method    | Score | m/z   |
|----------|------|-----------|-------|-------|
| sys_30_1 | 8861 | FTMS; HCD | 75.82 | 525.7 |

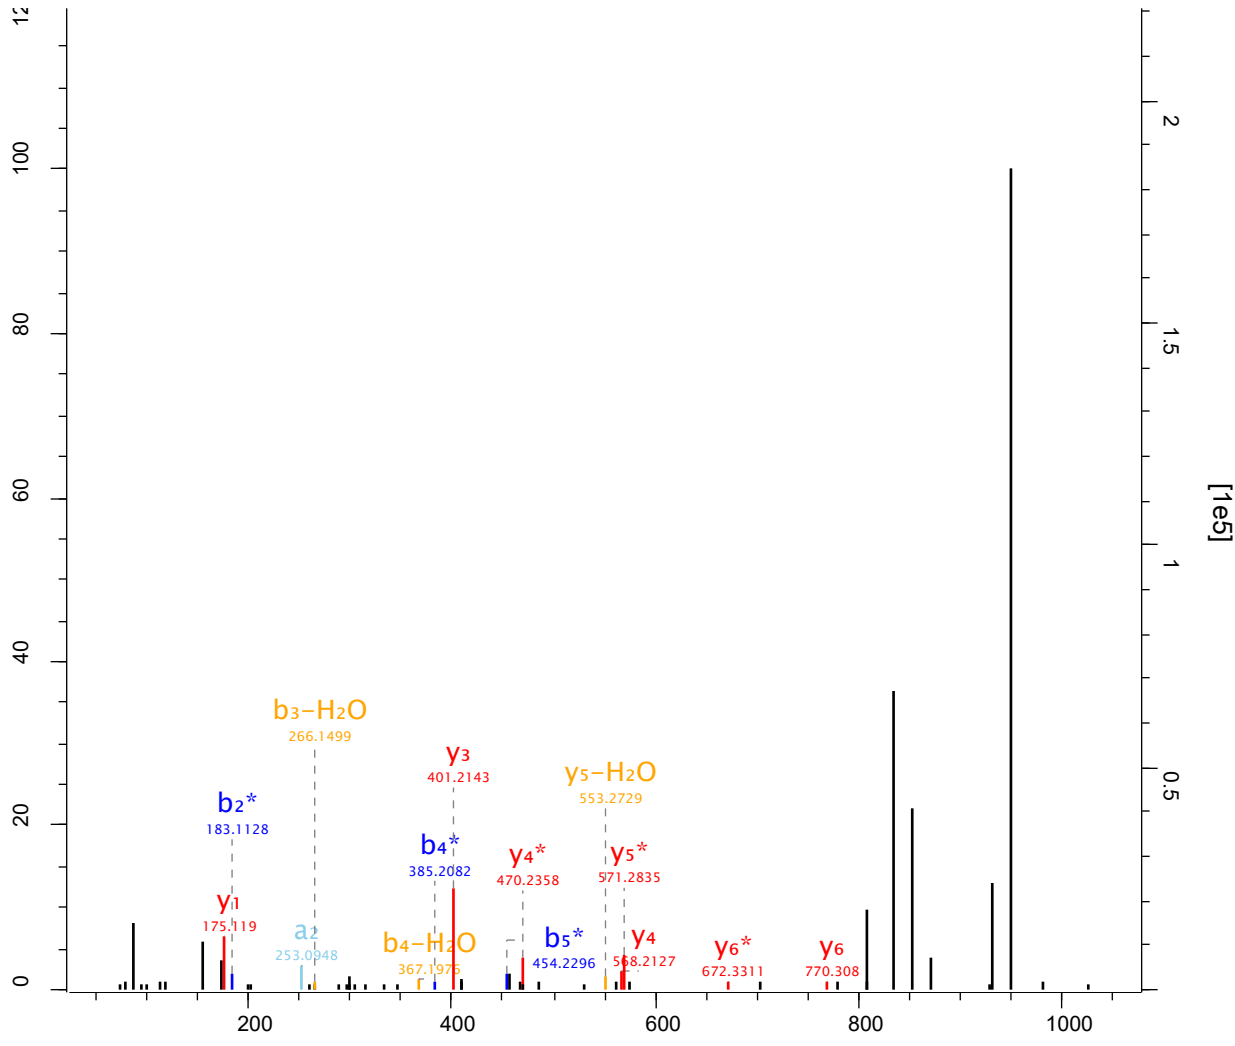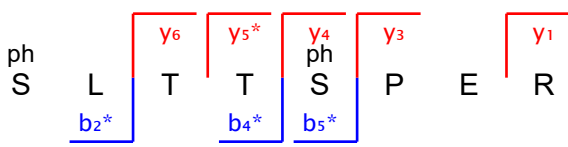

Raw file Scan Method Score m/z  
 sys\_30\_1 9198 FTMS; HCD 153.54 534.74

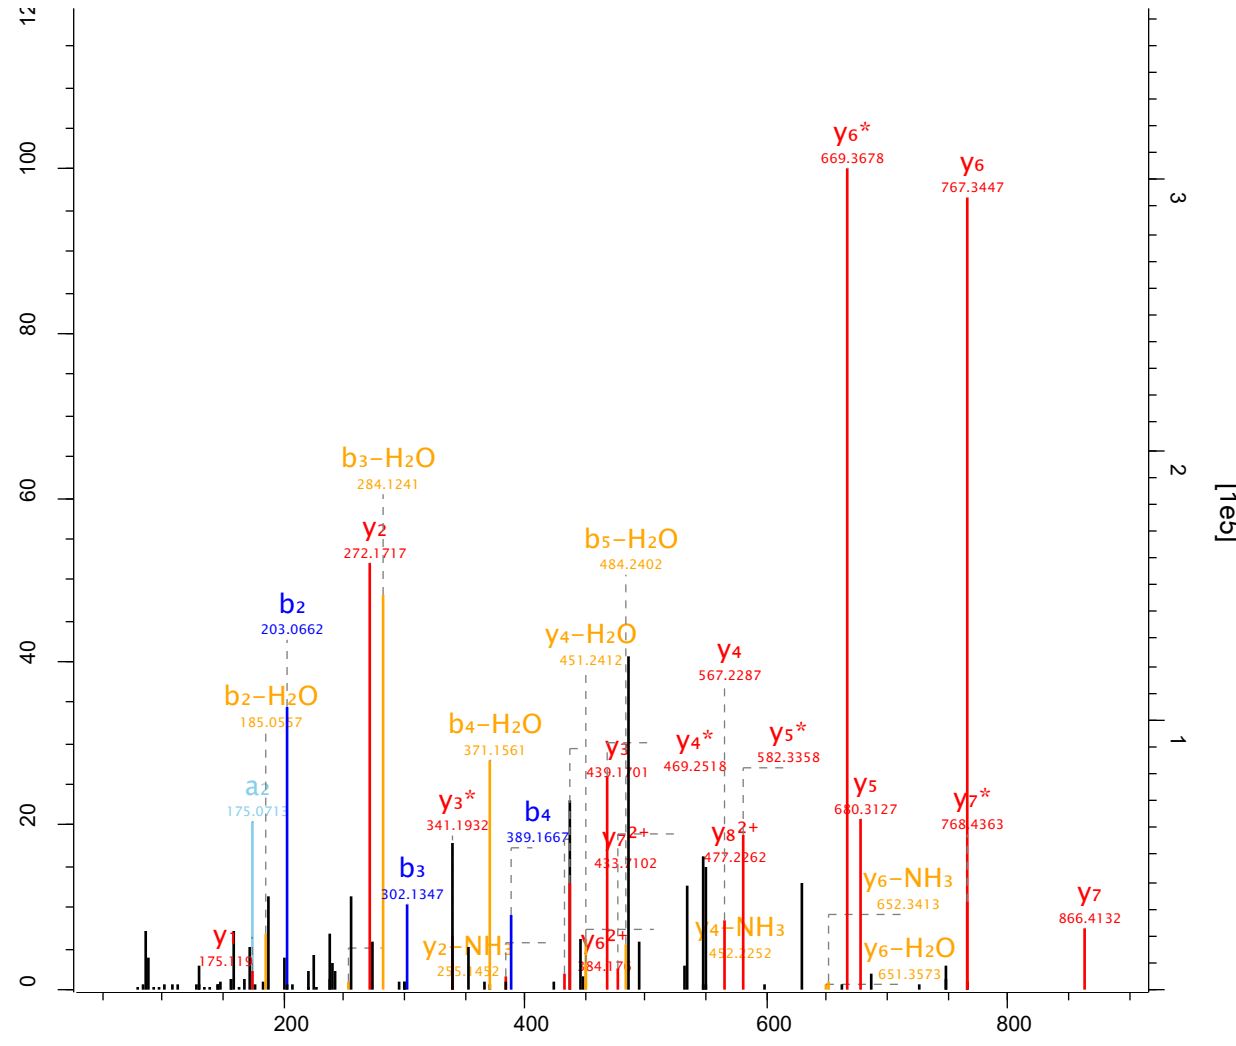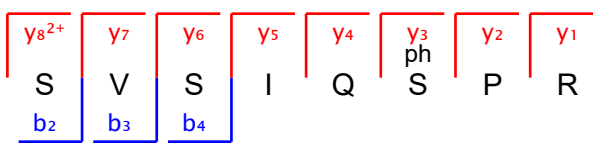

Supplement: 143488_2_supp_337930_ps5hgk.pdf [file 143488_2_supp_337930_ps5hgk.pdf]
