# Supplementary material for: The Systemin Signaling Cascade As Derived from Time Course Analyses of the Systemin-responsive Phosphoproteome
Source: PubMed Central journal article supplement (PMC6683004; doi:10.1074/mcp.ra119.001367), 2019-05-28

**Supplementary Figure 2:** Representative annotated spectra of identified phosphopeptides under systemin,A17 and water treatment as exported from MaxQuant.

Raw file Scan Method Score m/z  
 sys\_30\_2 10272 FTMS; HCD 218.01 602.27

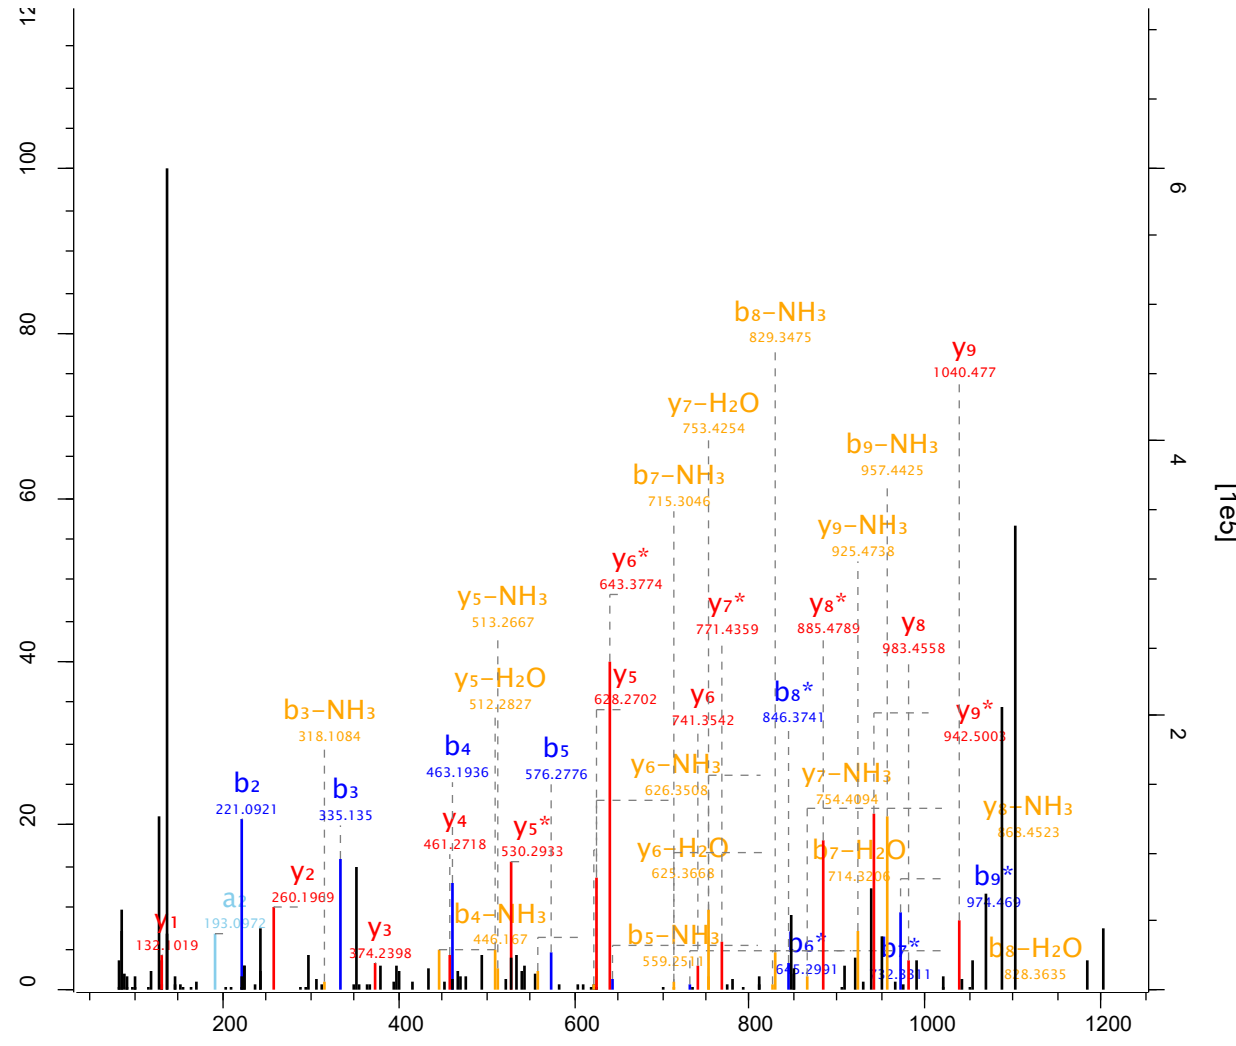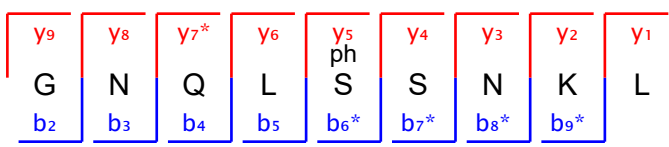

Raw file Scan Method Score m/z  
 sys\_30\_2 20145 FTMS; HCD 102.55 459.19

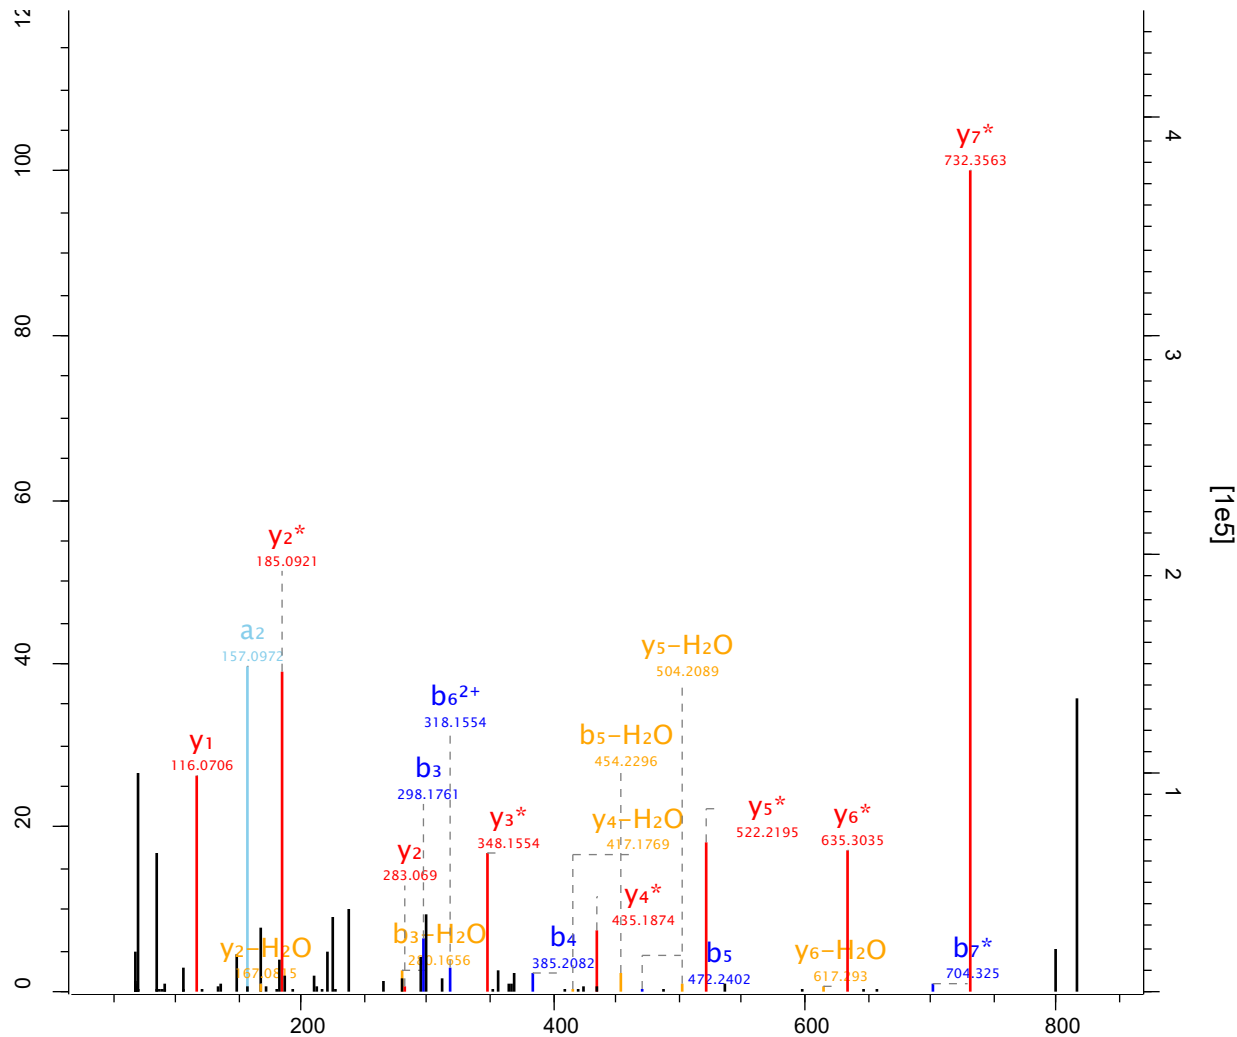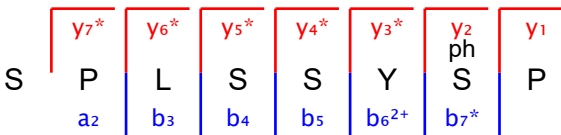

Raw file Scan Method Score m/z  
 sys\_30\_2 3964 FTMS; HCD 81.92 512.74

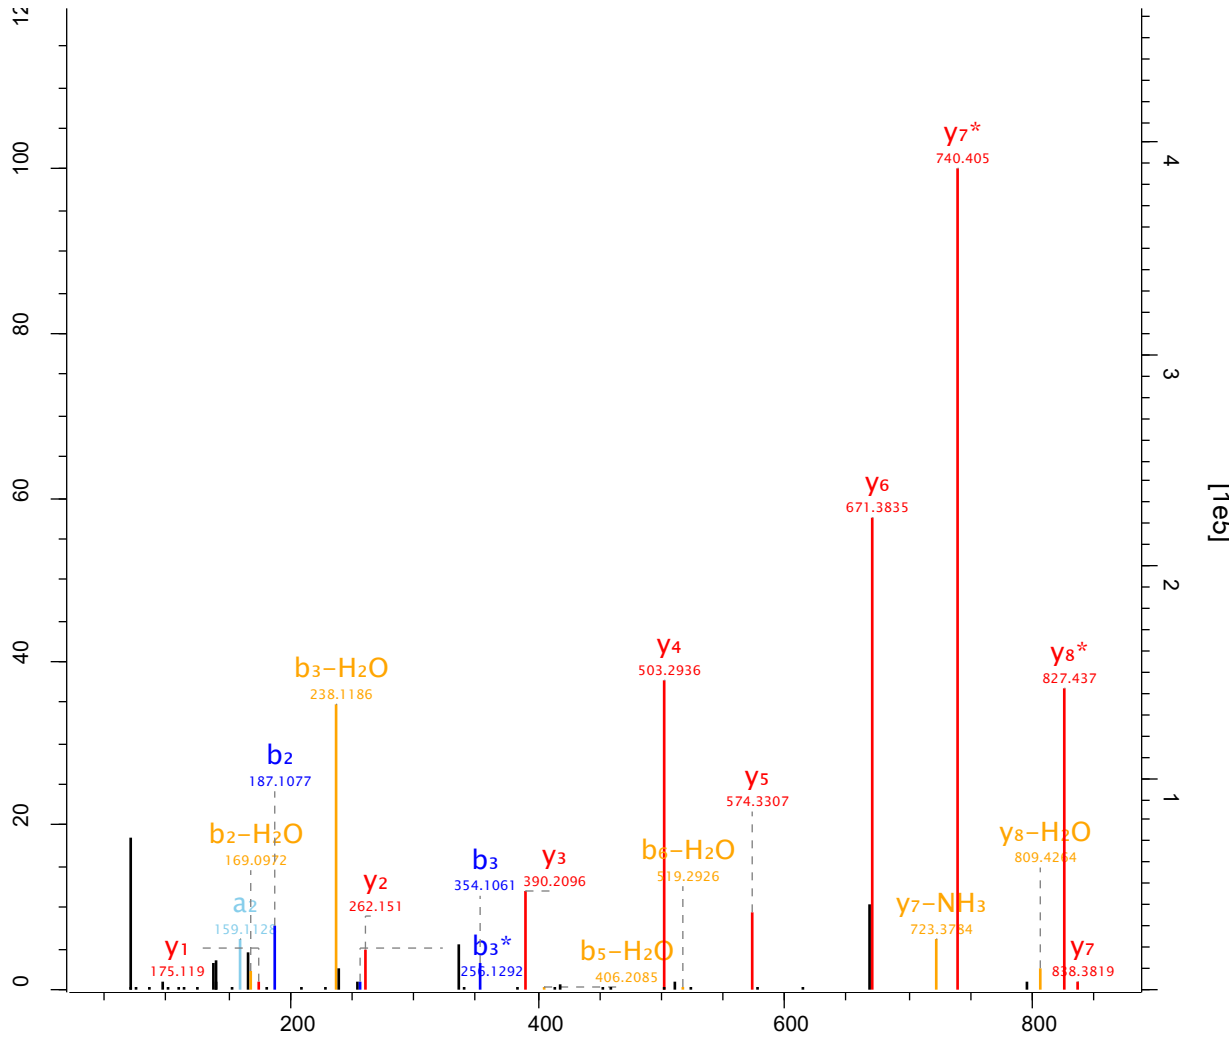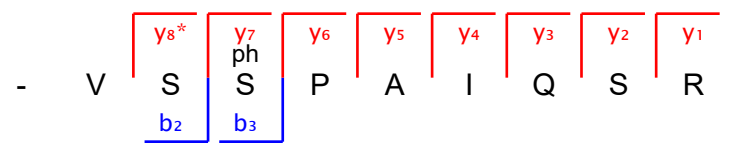

| Raw file | Scan | Method    | Score | m/z   |
|----------|------|-----------|-------|-------|
| sys_30_2 | 5526 | FTMS; HCD | 66.27 | 407.2 |

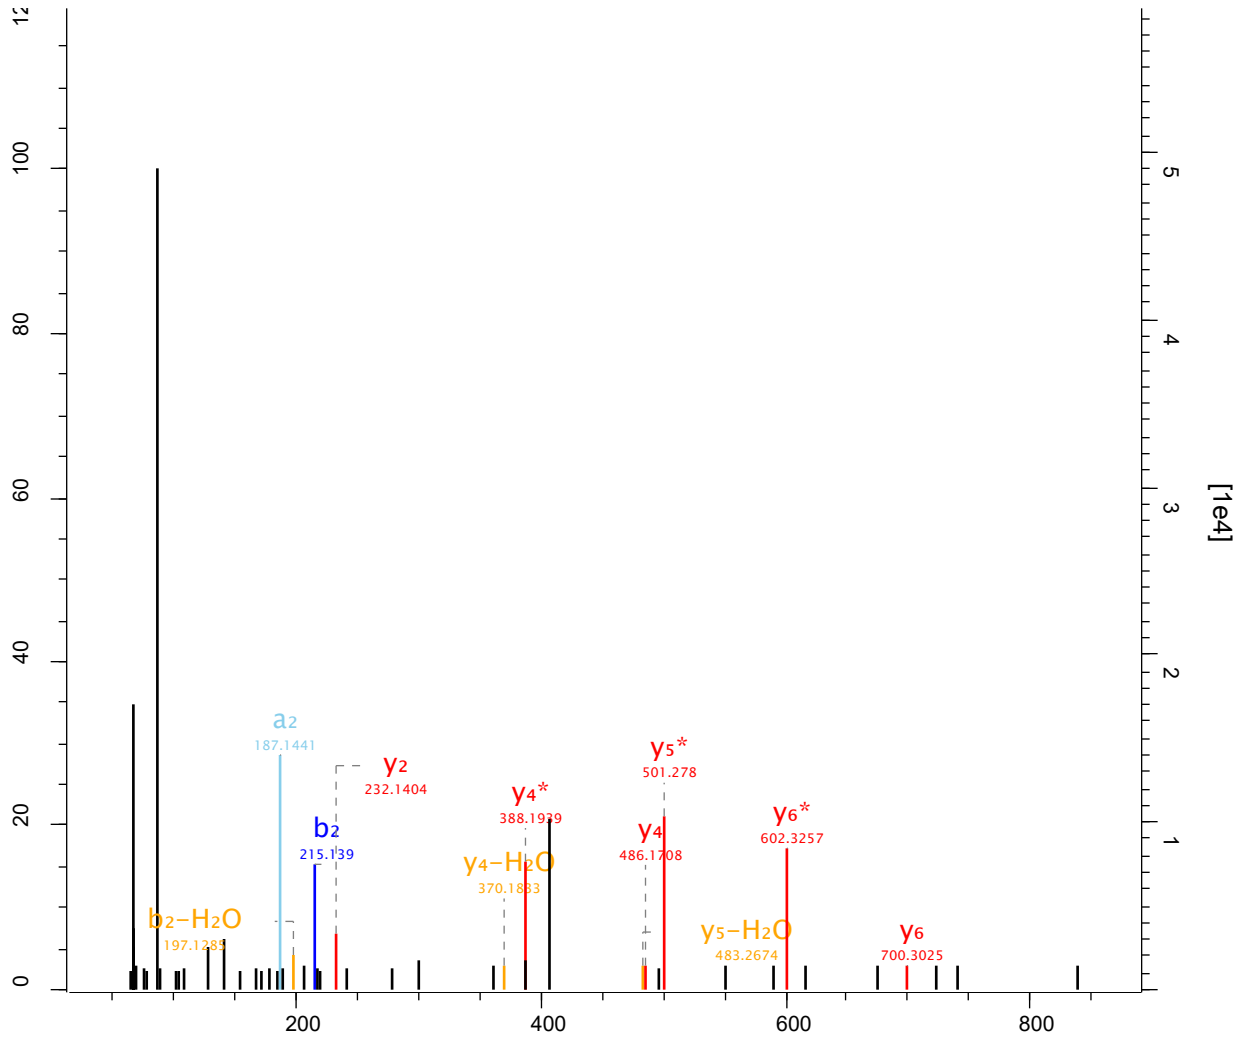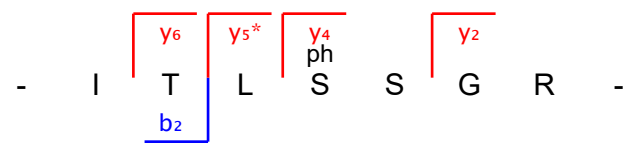

Raw file Scan Method Score m/z  
 sys\_30\_2 6657 FTMS; HCD 119.75 441.22

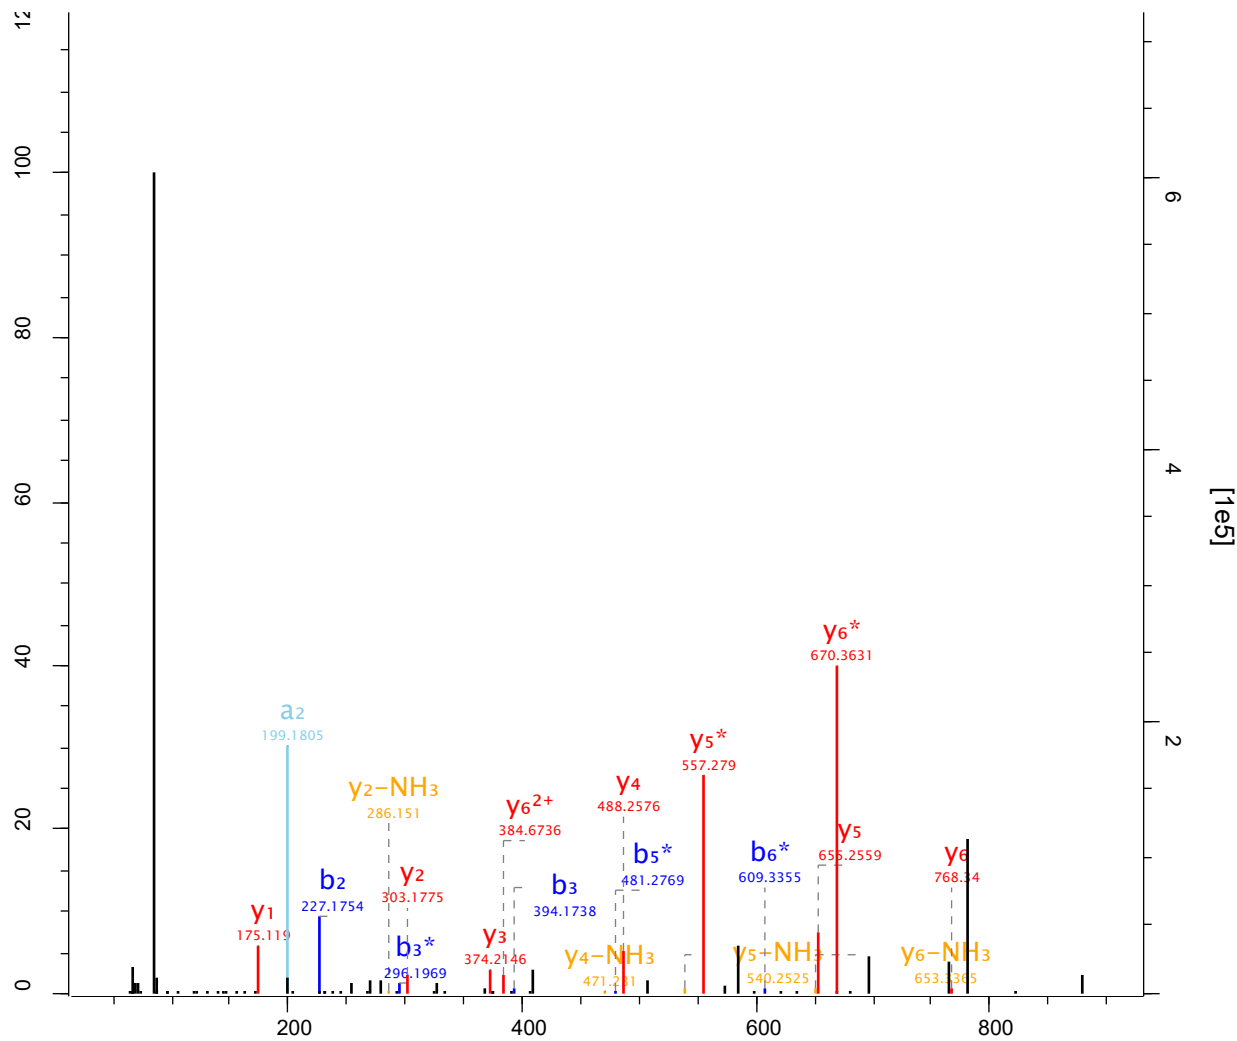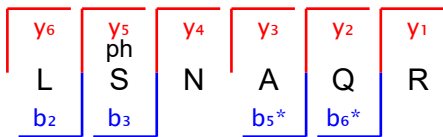

Raw file Scan Method Score m/z  
 sys\_30\_2 8708 FTMS; HCD 152.23 501.72

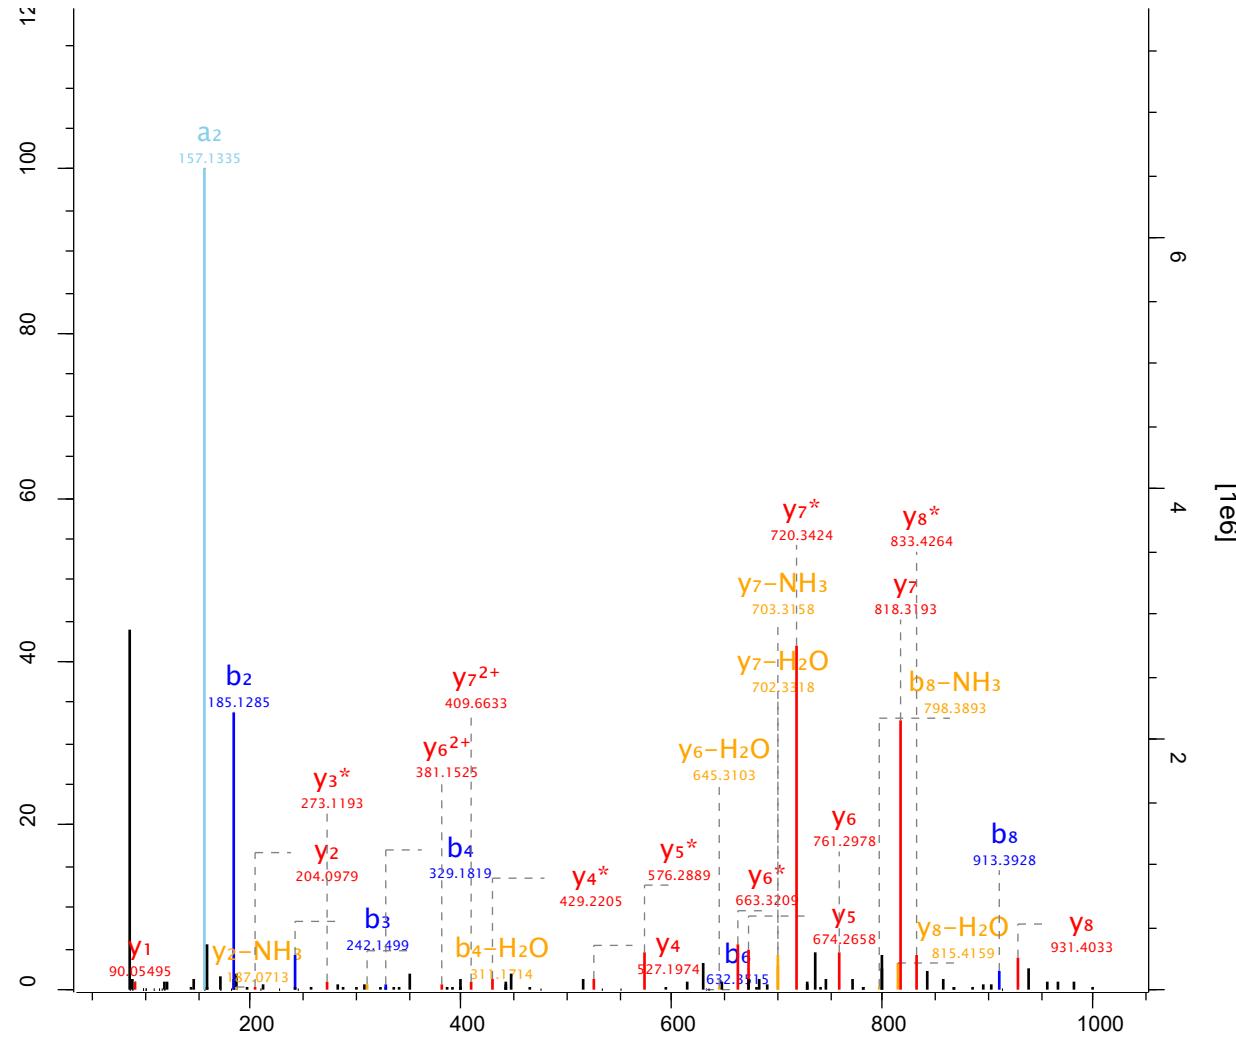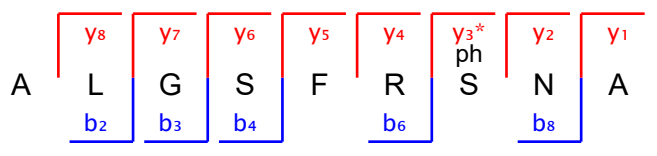

Raw file Scan Method Score m/z  
 sys\_30\_3 10802 FTMS; HCD 150.13 709.83

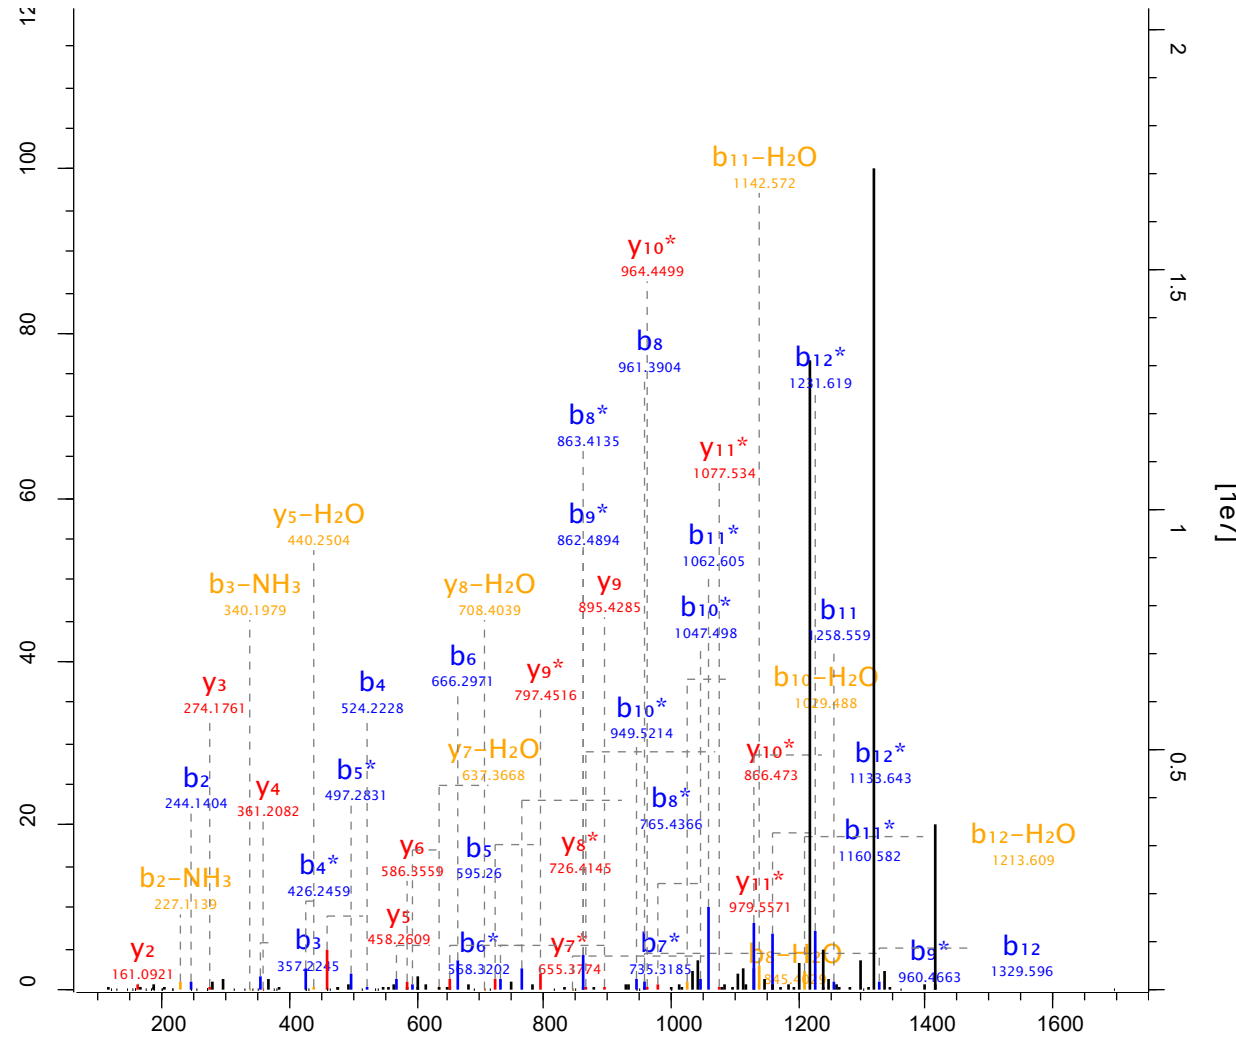

- S R L ph S A A S K P S I A A -

y11\*
y10\*
y9
y8\*
y7\*
y6
y5
y4
y3
y2

b2
b3
b4
b5
b6
b7\*
b8
b9\*
b10\*
b11
b12



Raw file Scan Method Score m/z  
 sys\_30\_3 13930 FTMS; HCD 57.53 598.77

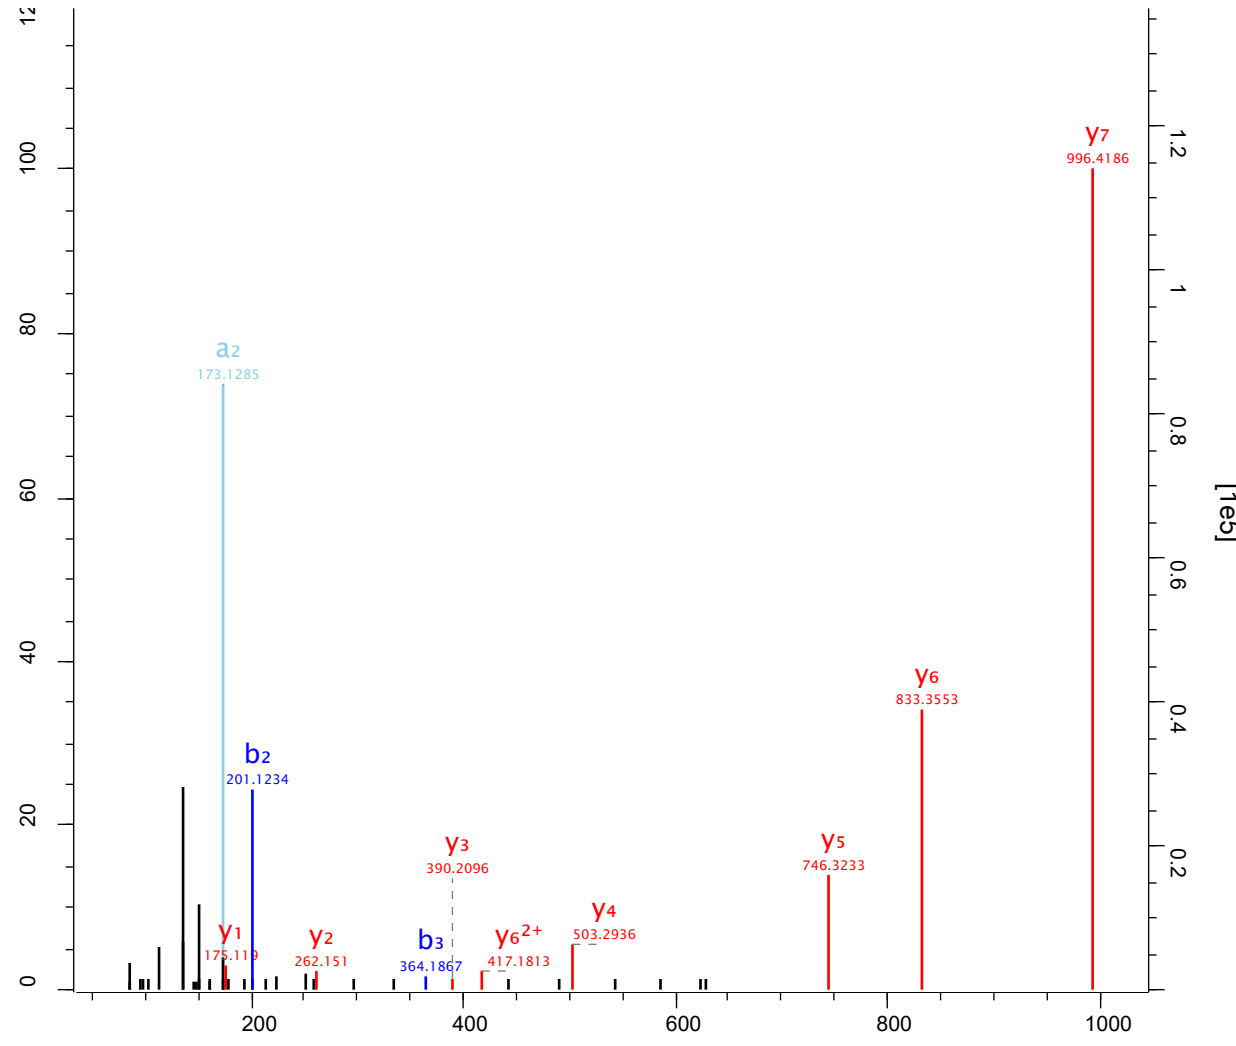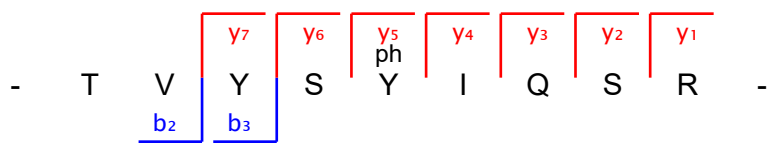

Raw file Scan Method Score m/z  
 sys\_30\_3 19654 FTMS; HCD 47.55 722.82

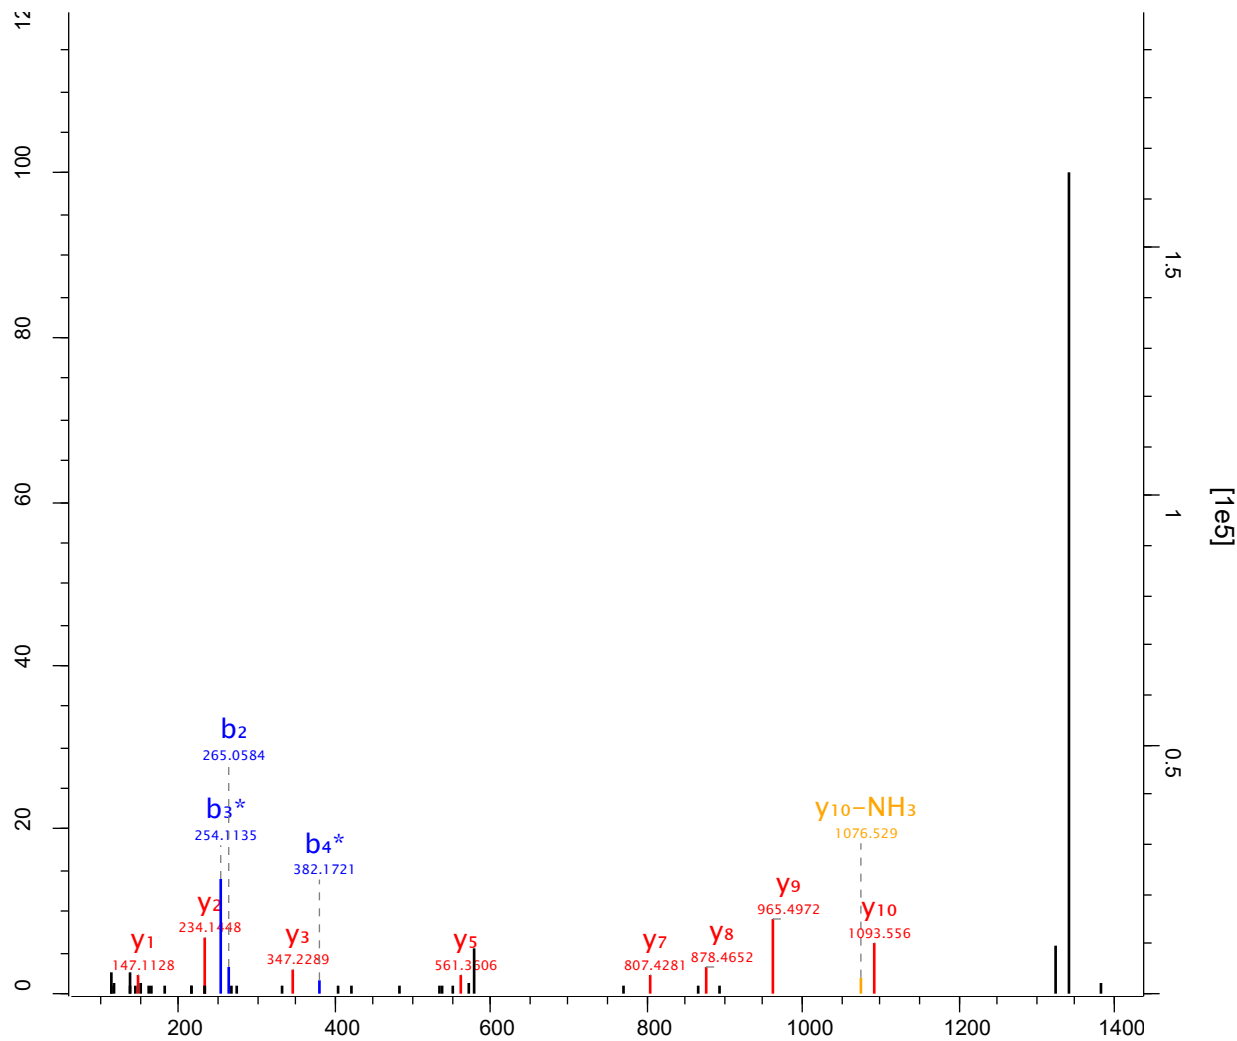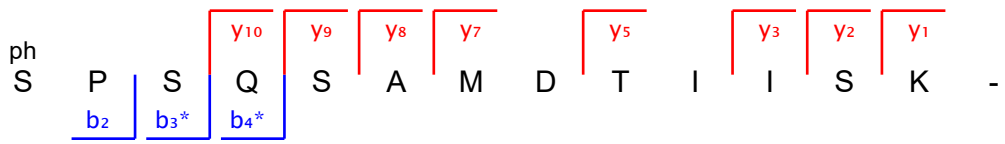

Raw file Scan Method Score m/z  
 sys\_30\_3 25568 FTMS; HCD 106.31 628.24

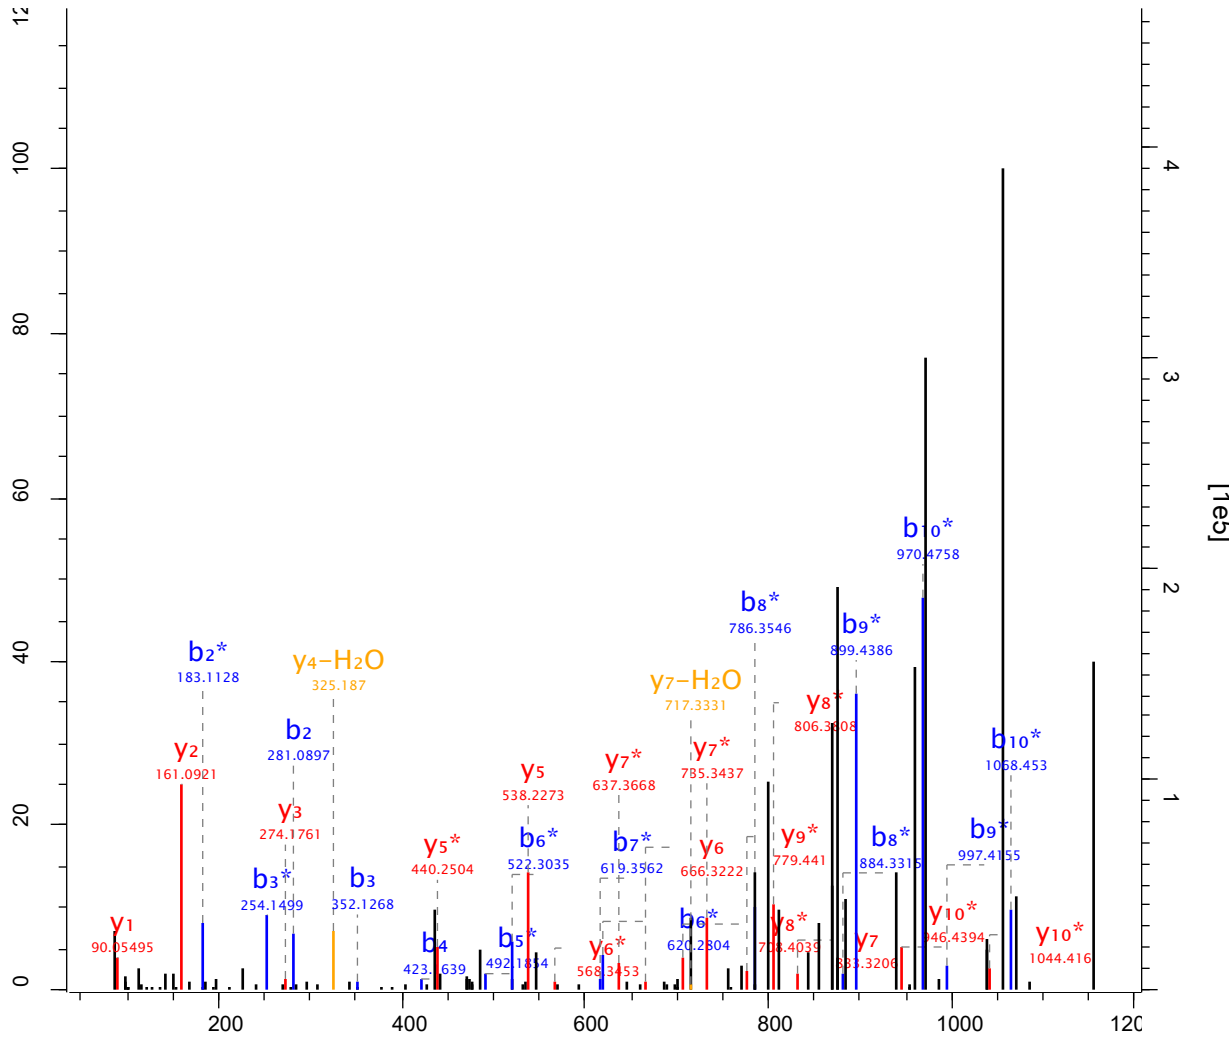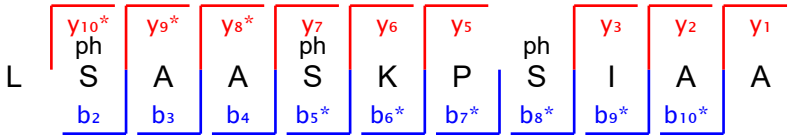

| Raw file | Scan | Method    | Score | m/z    |
|----------|------|-----------|-------|--------|
| sys_30_3 | 3325 | FTMS; HCD | 66.57 | 422.17 |

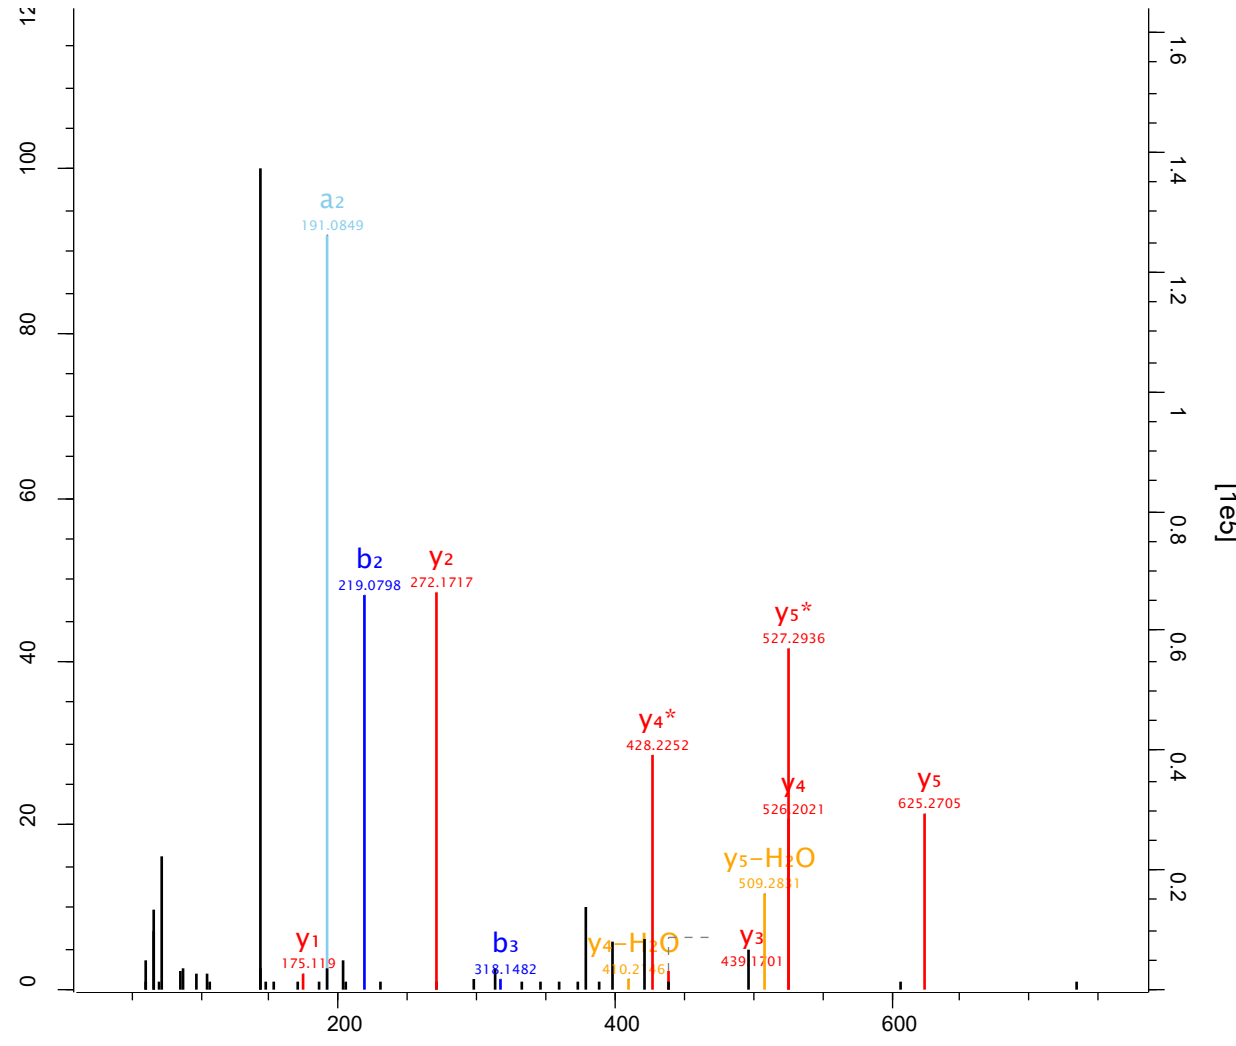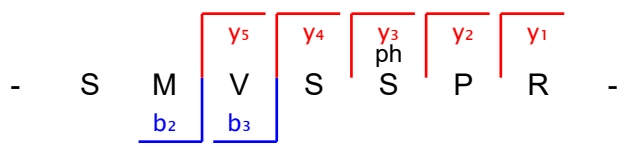

Raw file Scan Method Score m/z  
 sys\_30\_3 5822 FTMS; HCD 78.81 570.75

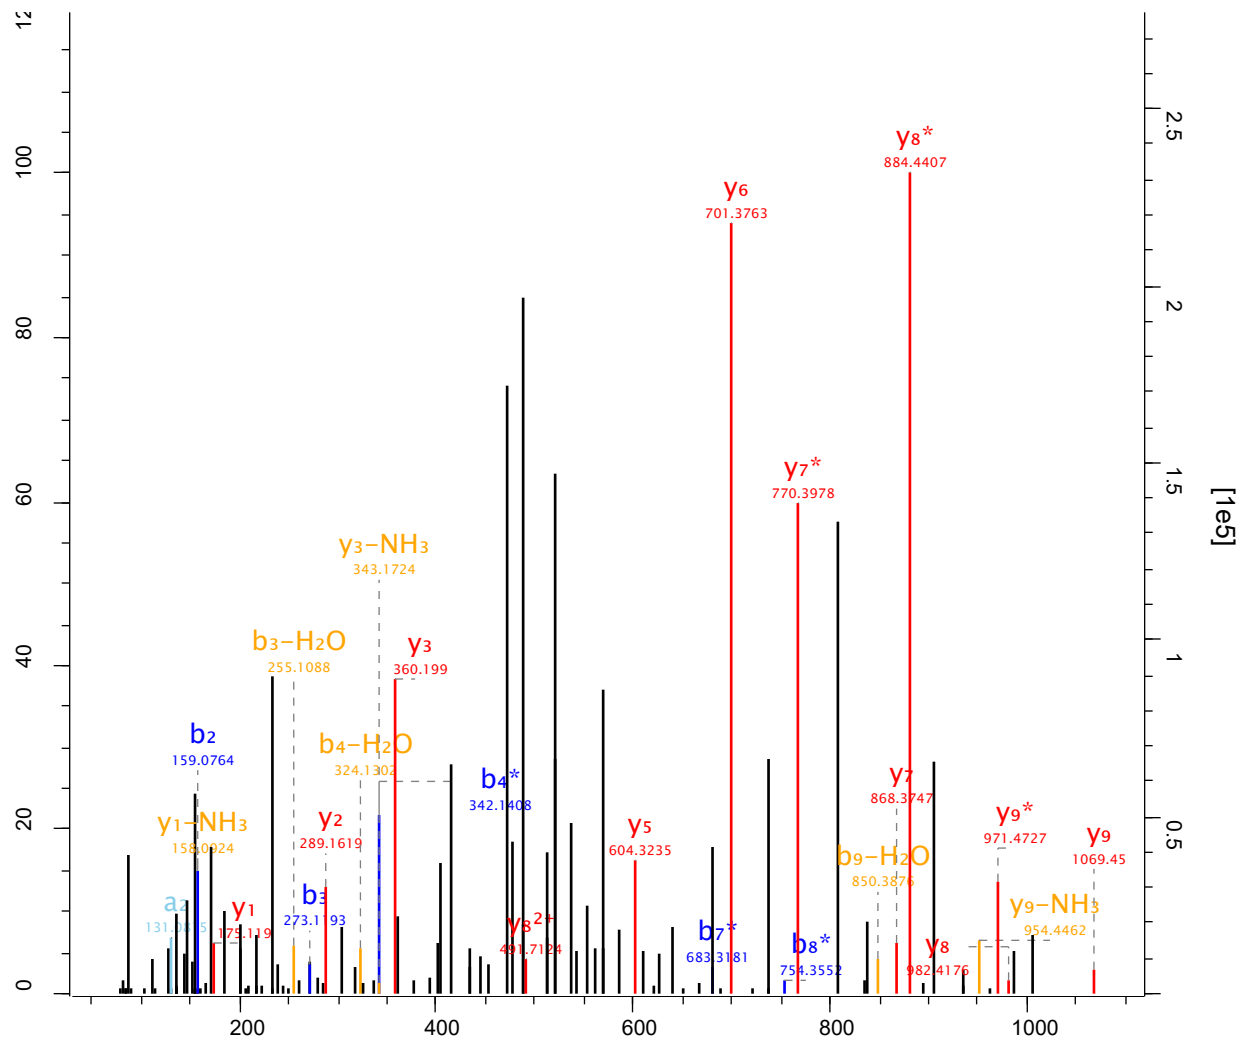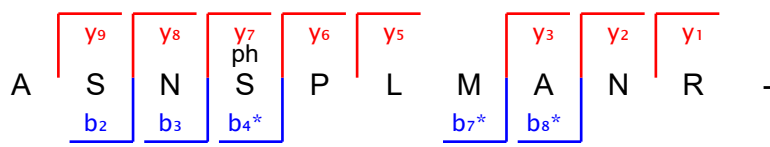

Raw file Scan Method Score m/z  
 sys\_30\_3 8493 FTMS; HCD 139.86 480.22

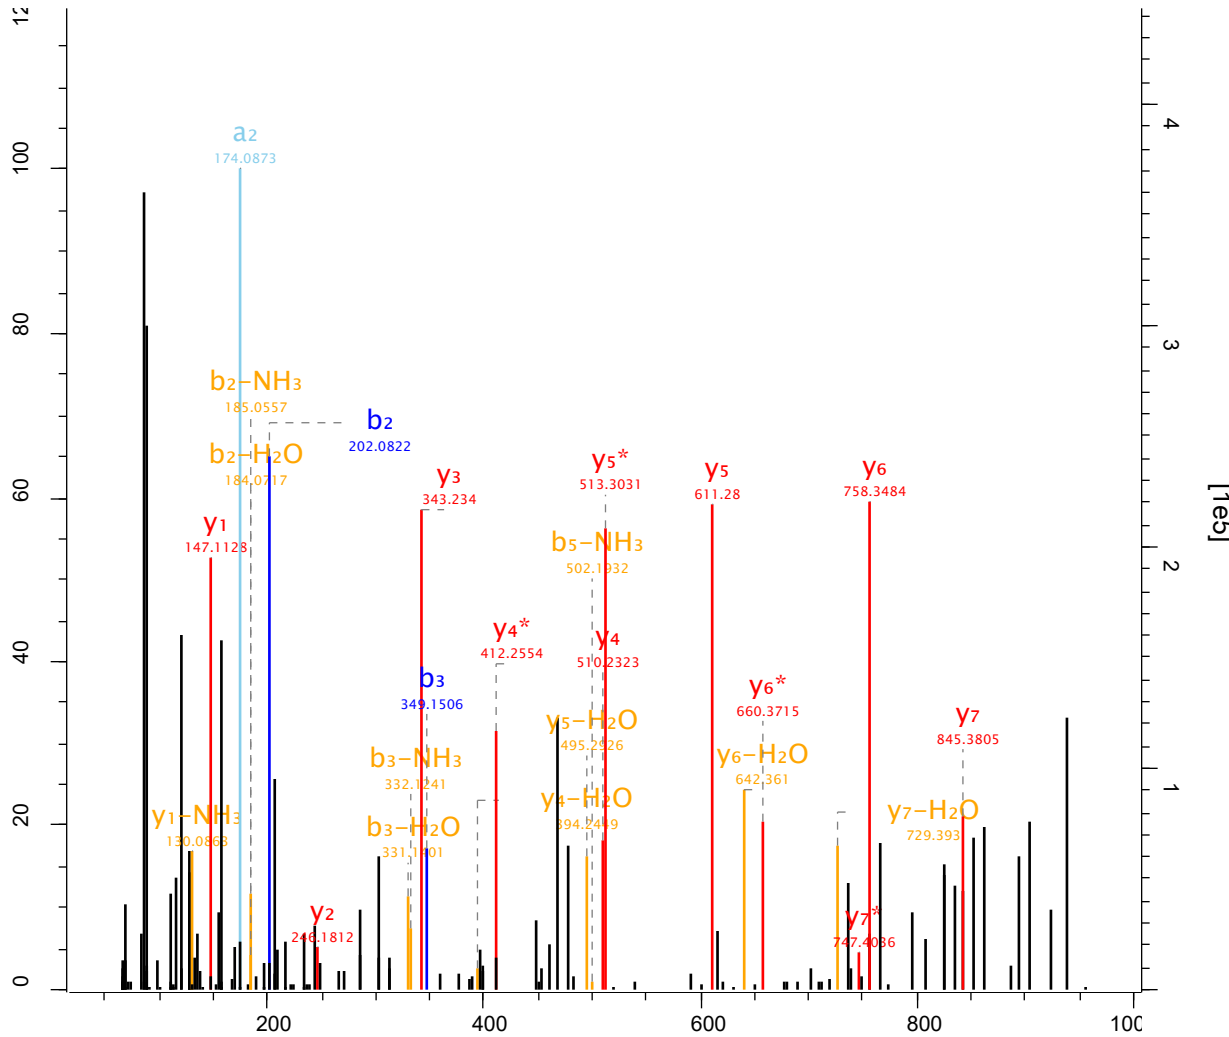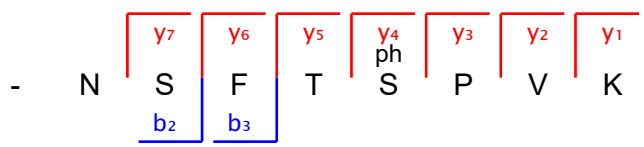

Raw file Scan Method Score m/z  
 sys\_30\_3 9507 FTMS; HCD 140.31 621.28

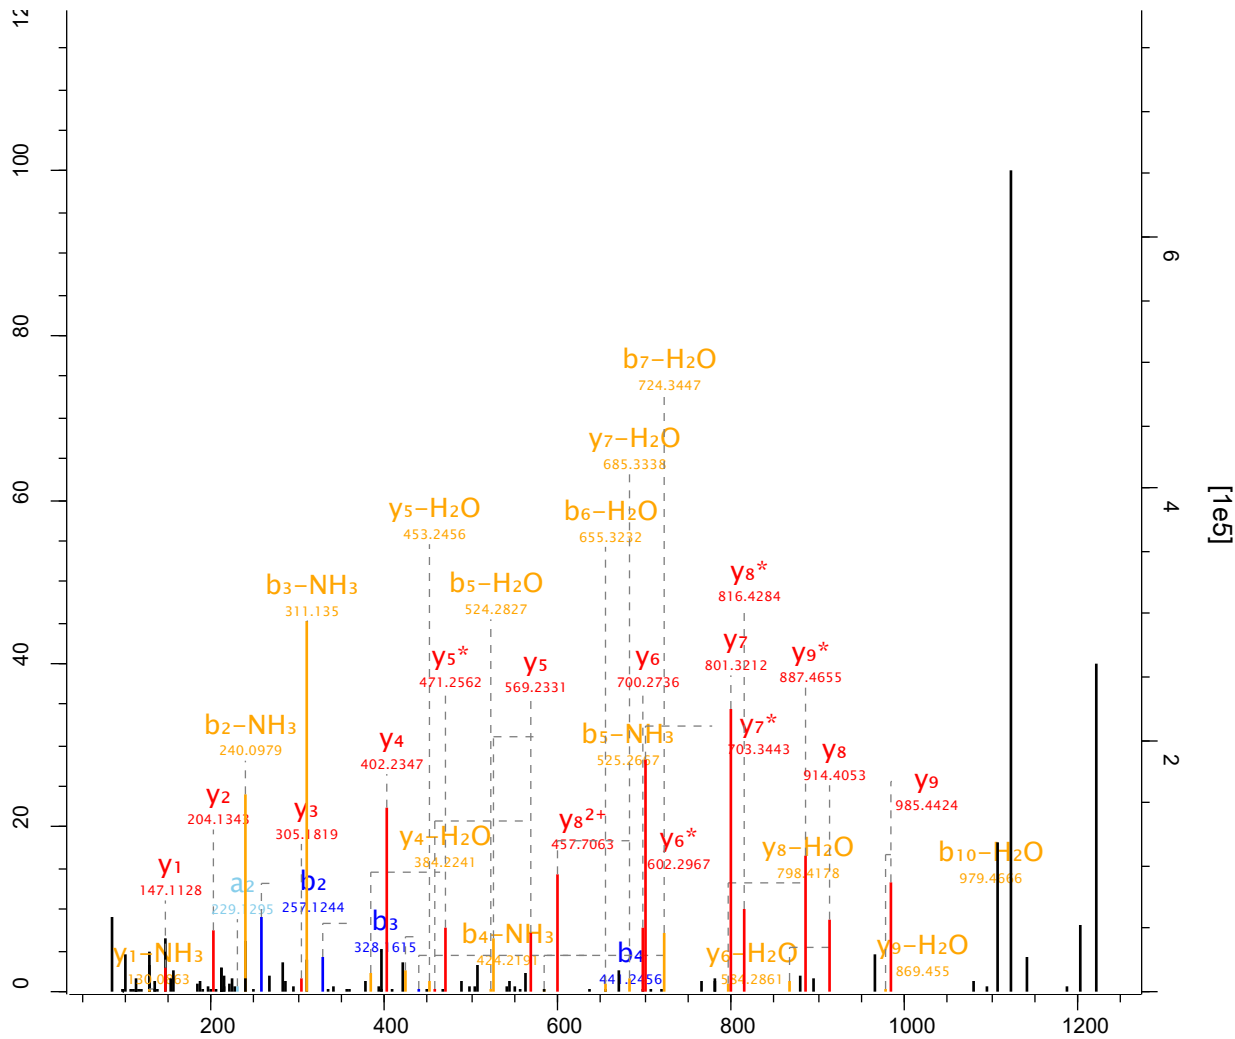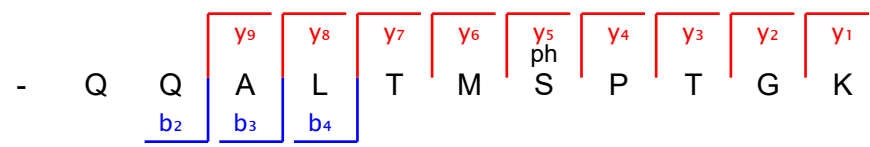

Supplement: 143488_2_supp_337931_ps5hgk.pdf [file 143488_2_supp_337931_ps5hgk.pdf]
