# Supplementary material for: The Systemin Signaling Cascade As Derived from Time Course Analyses of the Systemin-responsive Phosphoproteome
Source: PubMed Central journal article supplement (PMC6683004; doi:10.1074/mcp.ra119.001367), 2019-05-28

**Supplementary Figure 2:** Representative annotated spectra of identified phosphopeptides under systemin,A17 and water treatment as exported from MaxQuant.



Raw file Scan Method Score m/z  
 sys\_05\_2 10545 FTMS; HCD 184.58 495.72

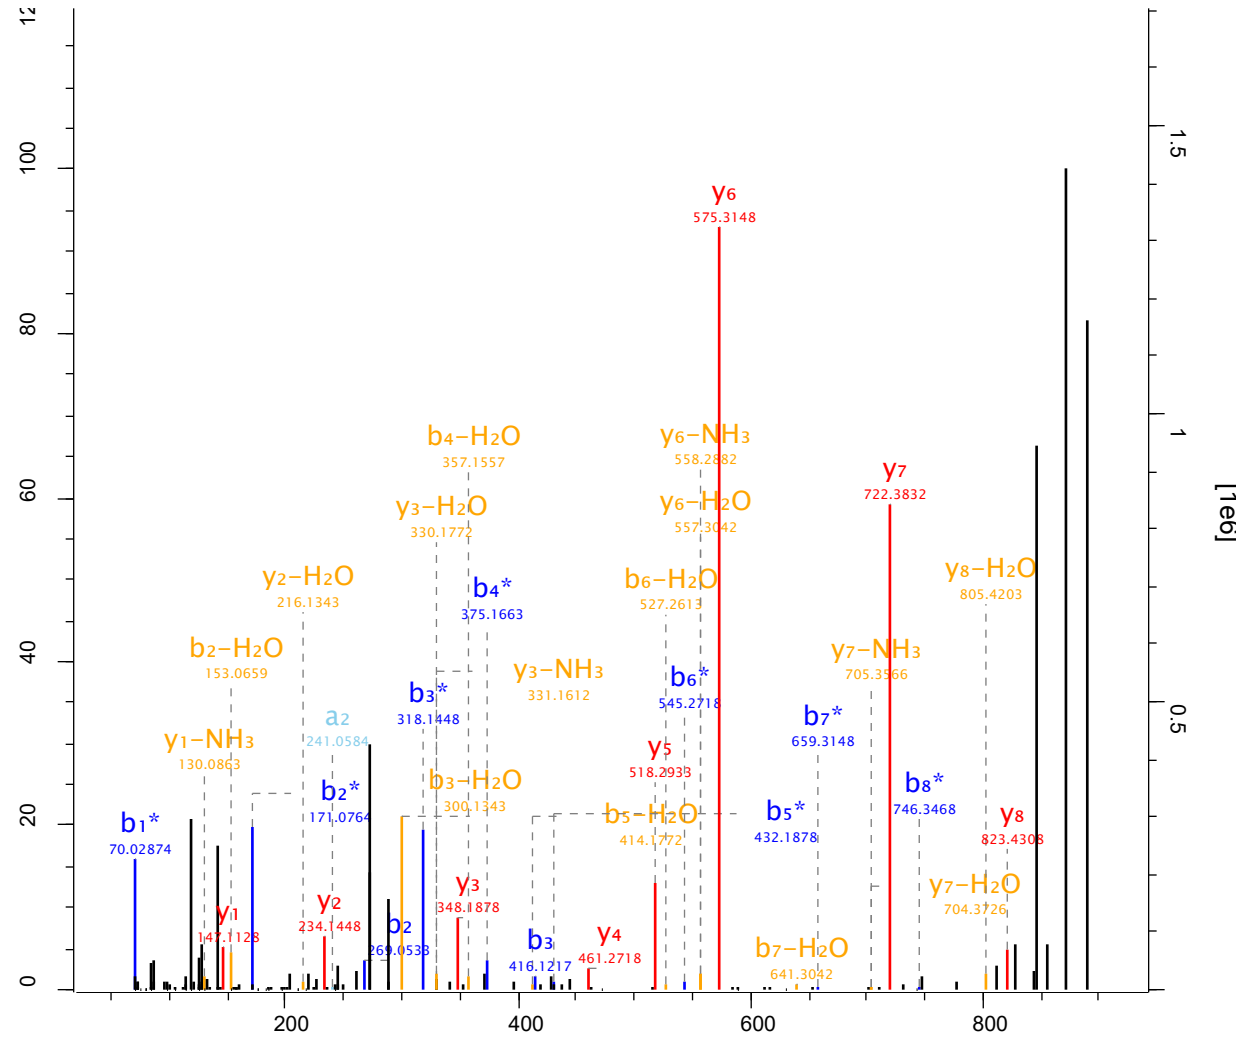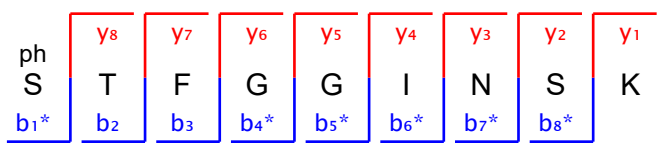

Raw file Scan Method Score m/z  
 sys\_05\_2 10652 FTMS; HCD 54.34 555.2

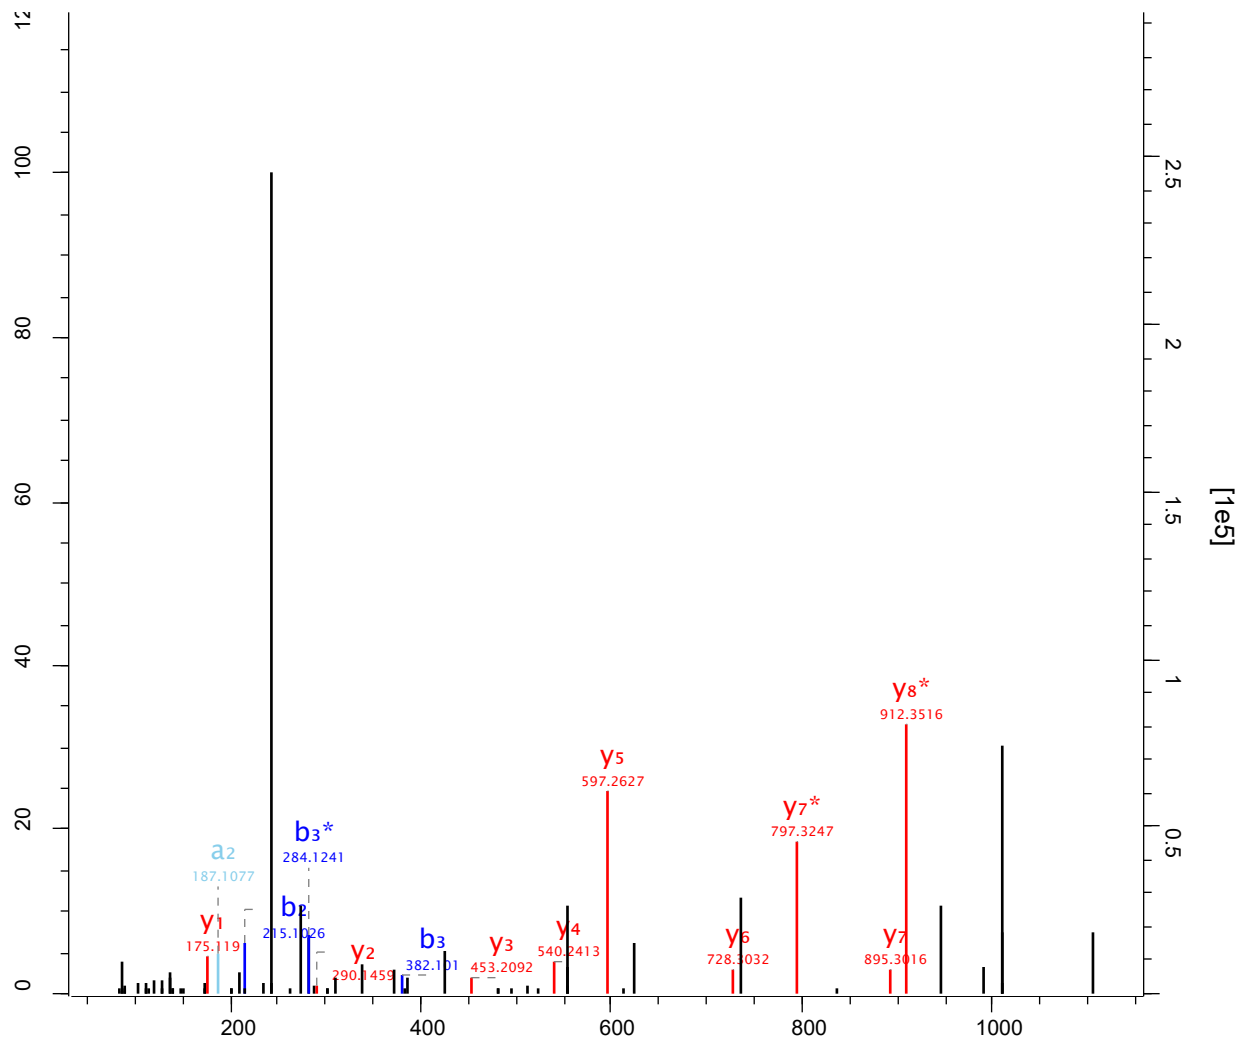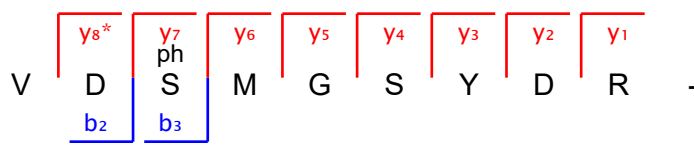



Raw file Scan Method Score m/z  
 sys\_05\_2 10685 FTMS; HCD 83.53 570.77

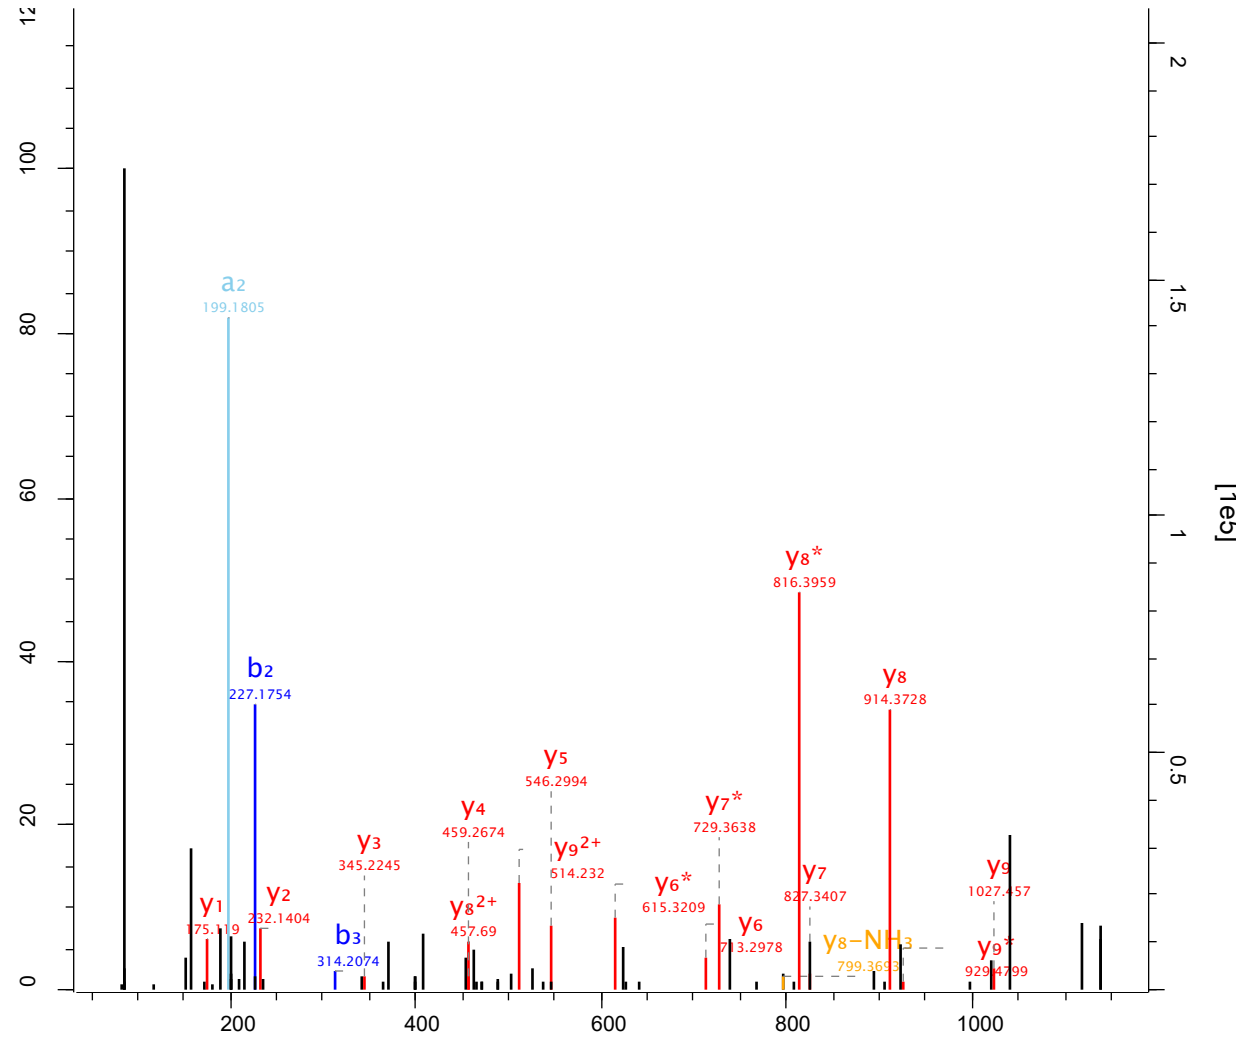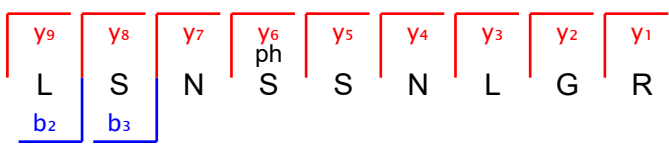

Raw file Scan Method Score m/z  
 sys\_05\_2 10875 FTMS; HCD 184.99 637.27

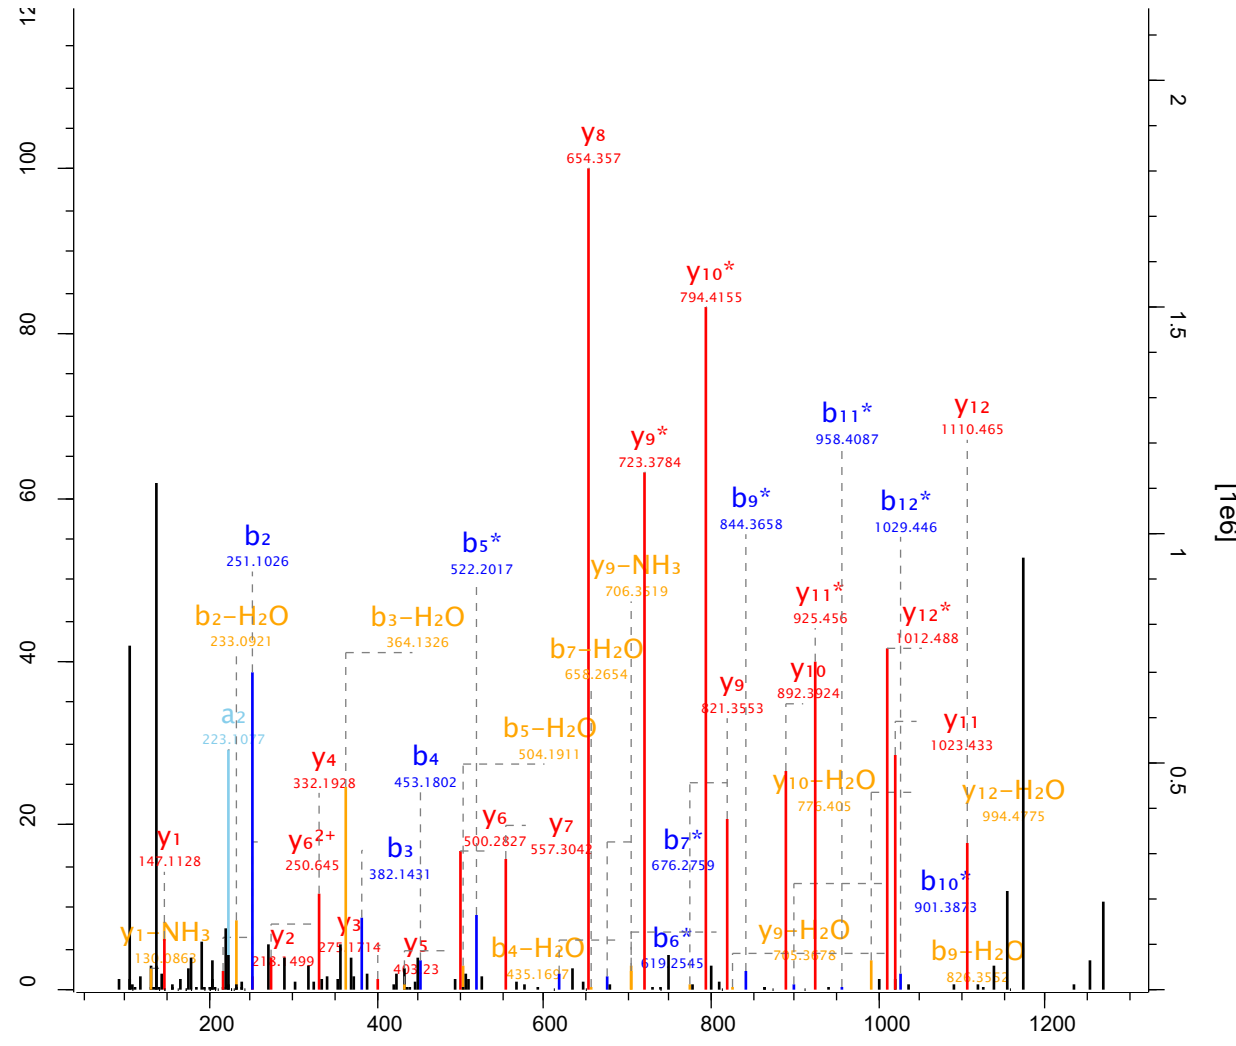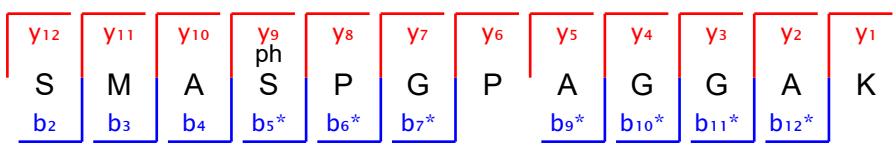

Raw file Scan Method Score m/z  
 sys\_05\_2 11317 FTMS; HCD 62.16 598.73

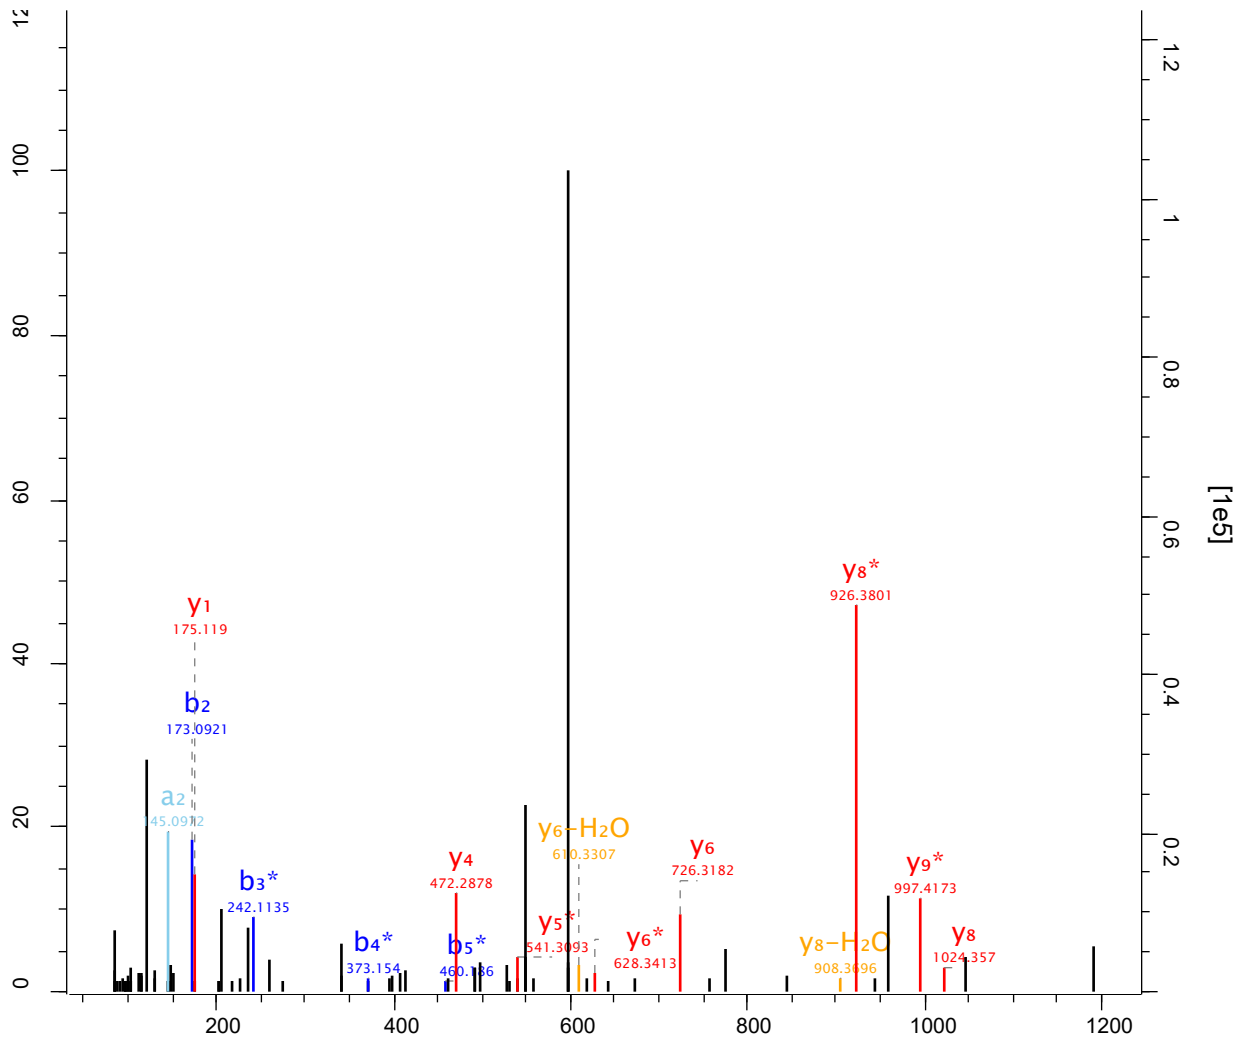

- T A S M S S P T V R -

Fragmentation labels below the sequence:

- $y_9^*$  (A)
- $y_8$  (S)
- $y_6$  (S)
- $y_5^*$  (S)
- $y_4$  (P)
- $y_1$  (R)
- $b_2$  (A)
- $b_3^*$  (S)
- $b_4^*$  (M)
- $b_5^*$  (S)

Raw file Scan Method Score m/z  
 sys\_05\_2 11428 FTMS; HCD 229.59 584.22

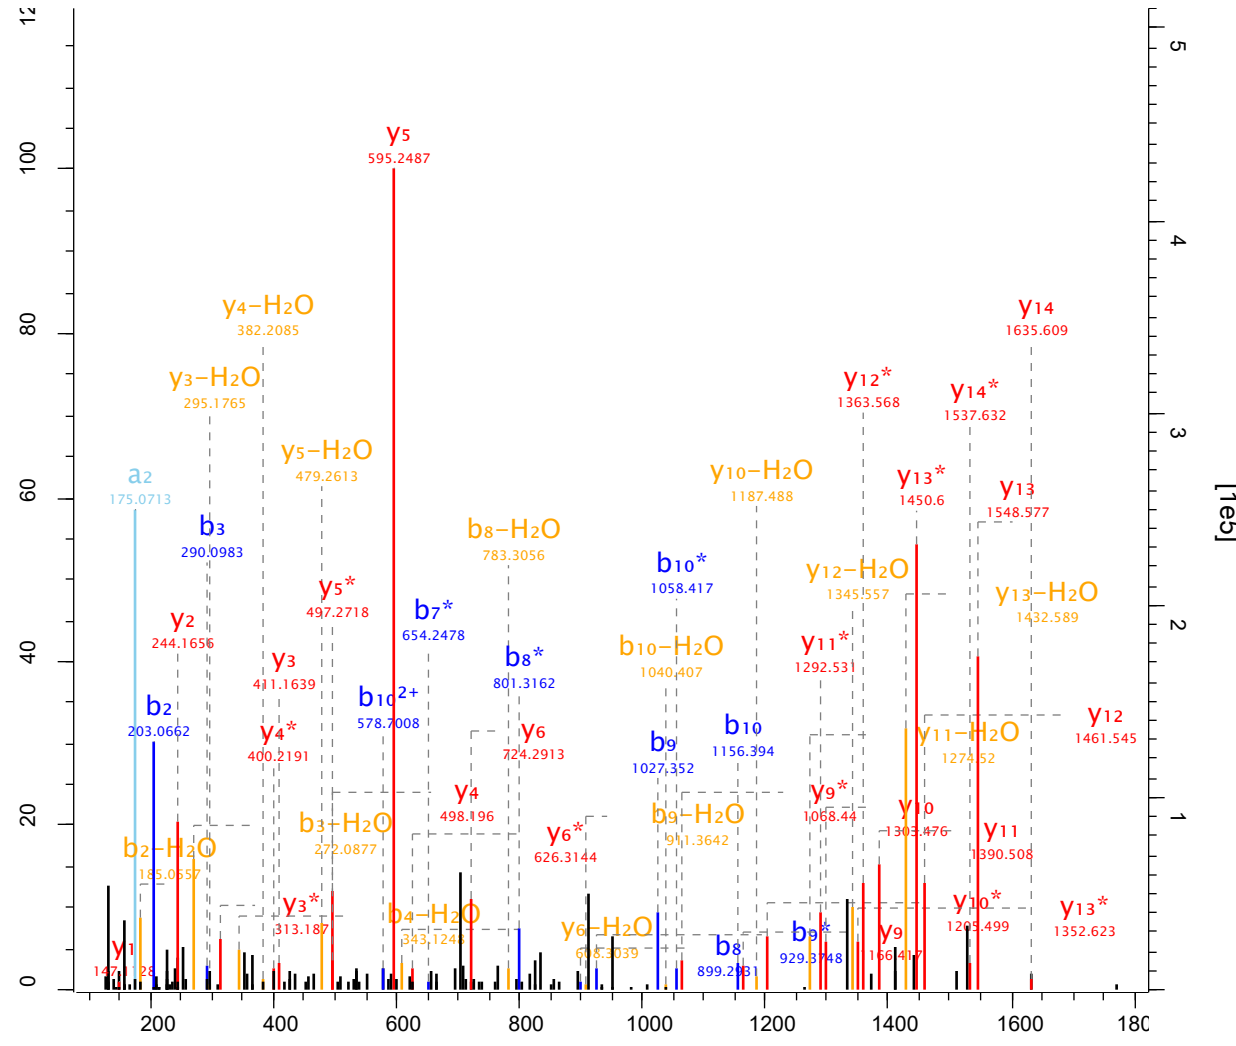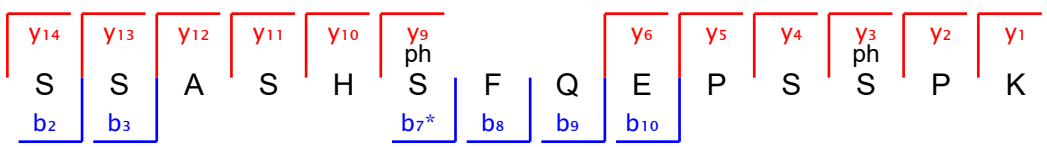

Raw file Scan Method Score m/z  
 sys\_05\_2 11434 FTMS; HCD 196.16 530.25

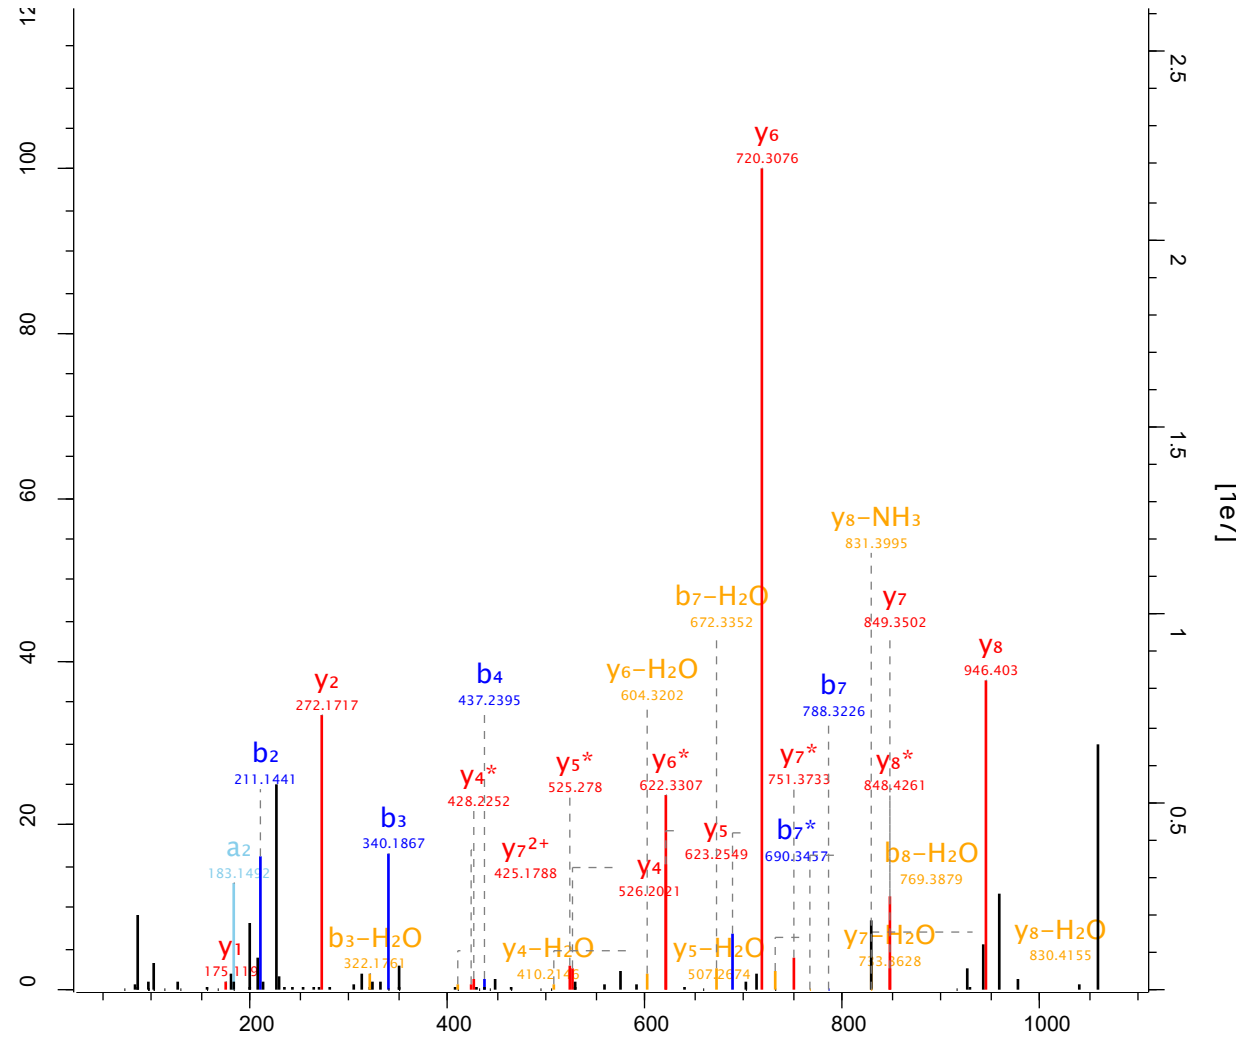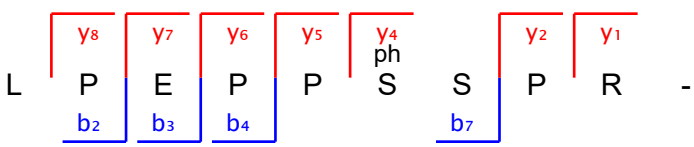

Raw file Scan Method Score m/z  
 sys\_05\_2 11488 FTMS; HCD 220.25 560.24

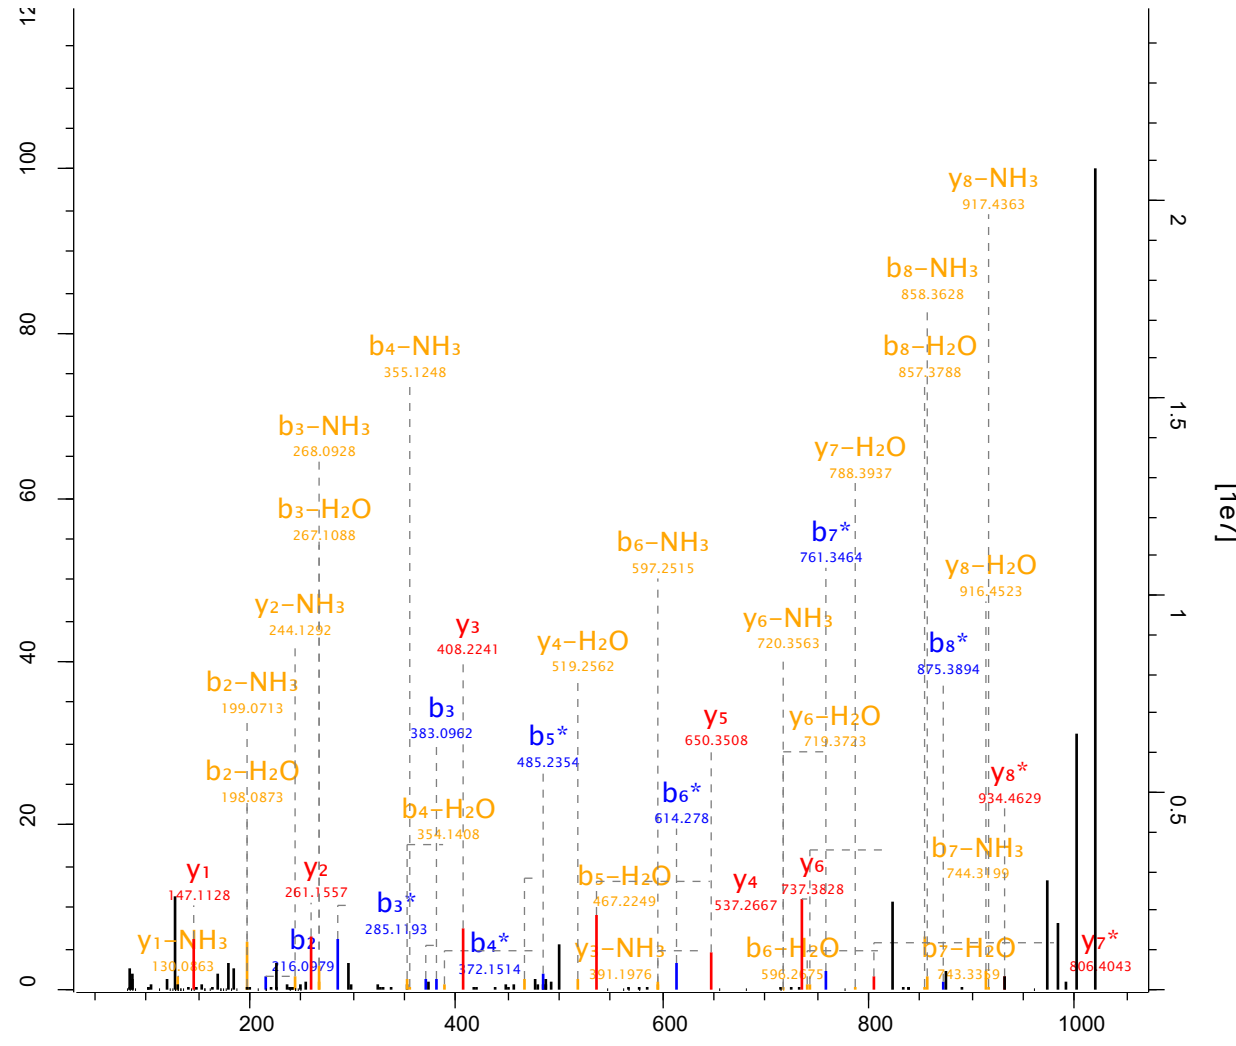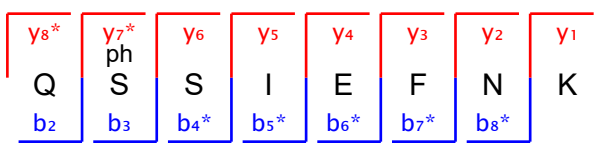

Raw file Scan Method Score m/z  
 sys\_05\_2 11562 FTMS; HCD 155.96 701.79

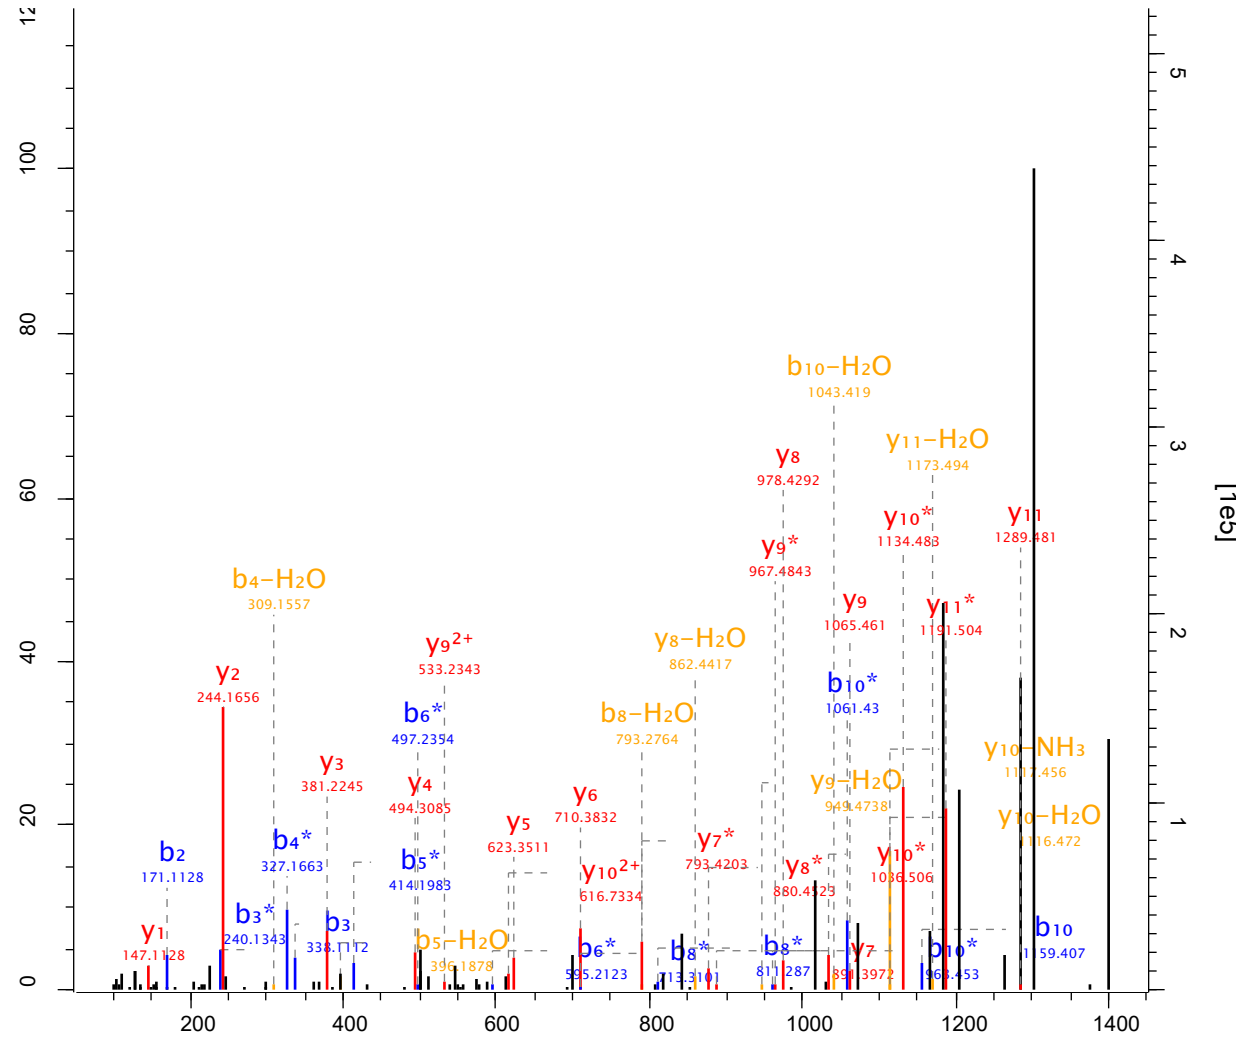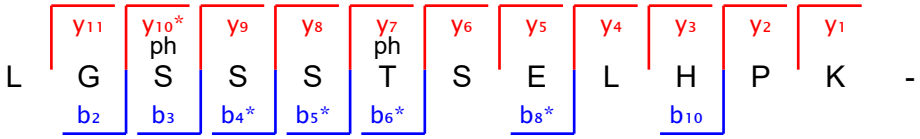

Raw file Scan Method Score m/z  
 sys\_05\_2 11572 FTMS; HCD 59.91 535.24

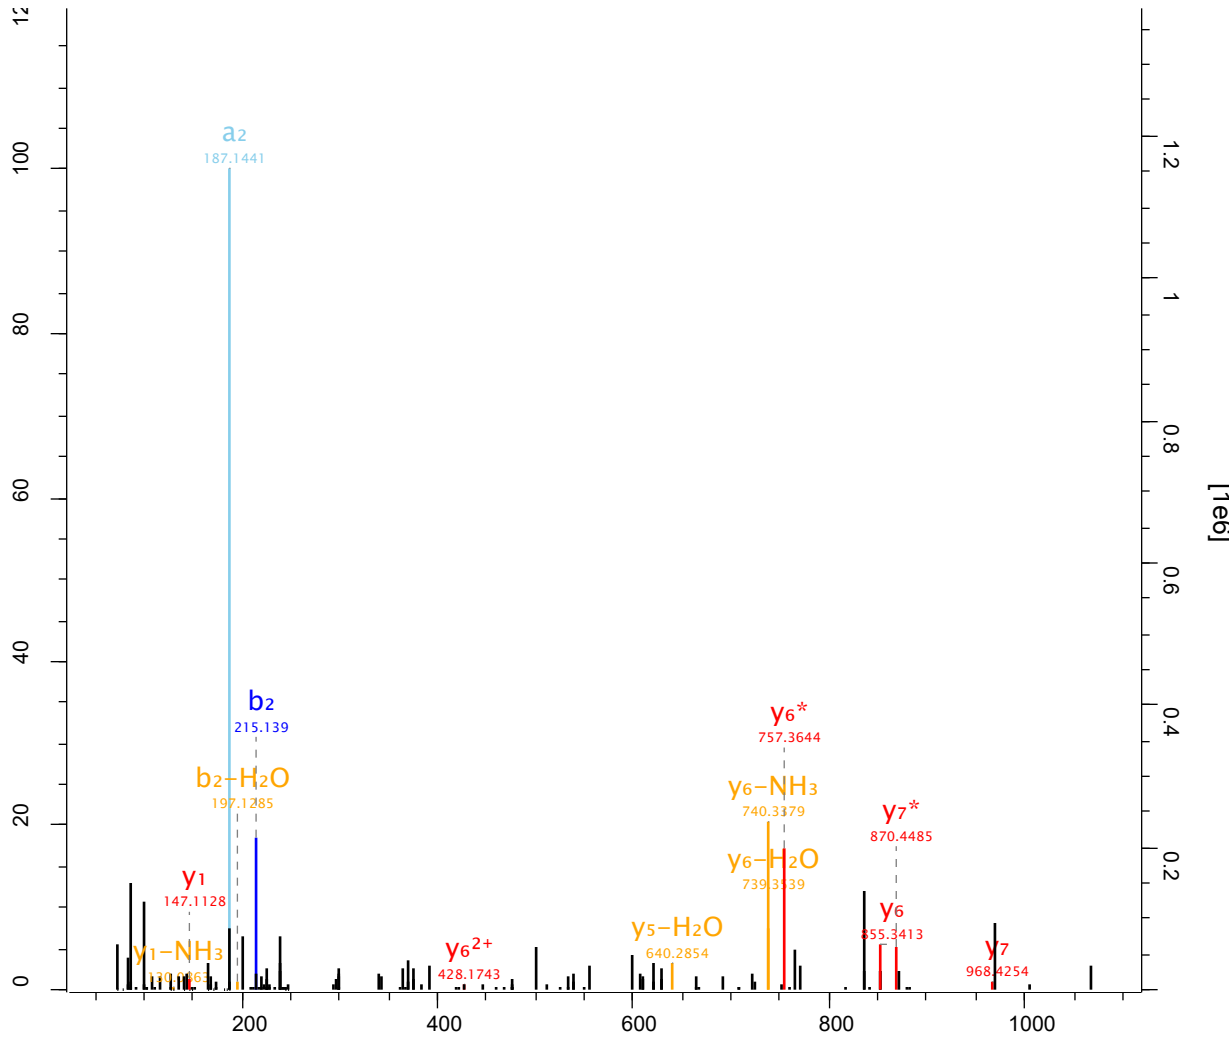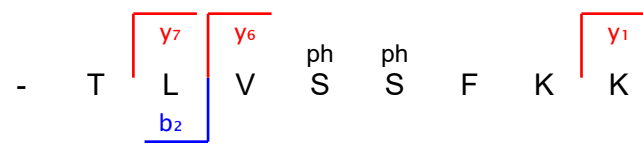





Raw file Scan Method Score m/z  
 sys\_05\_2 11628 FTMS; HCD 81.16 685.82

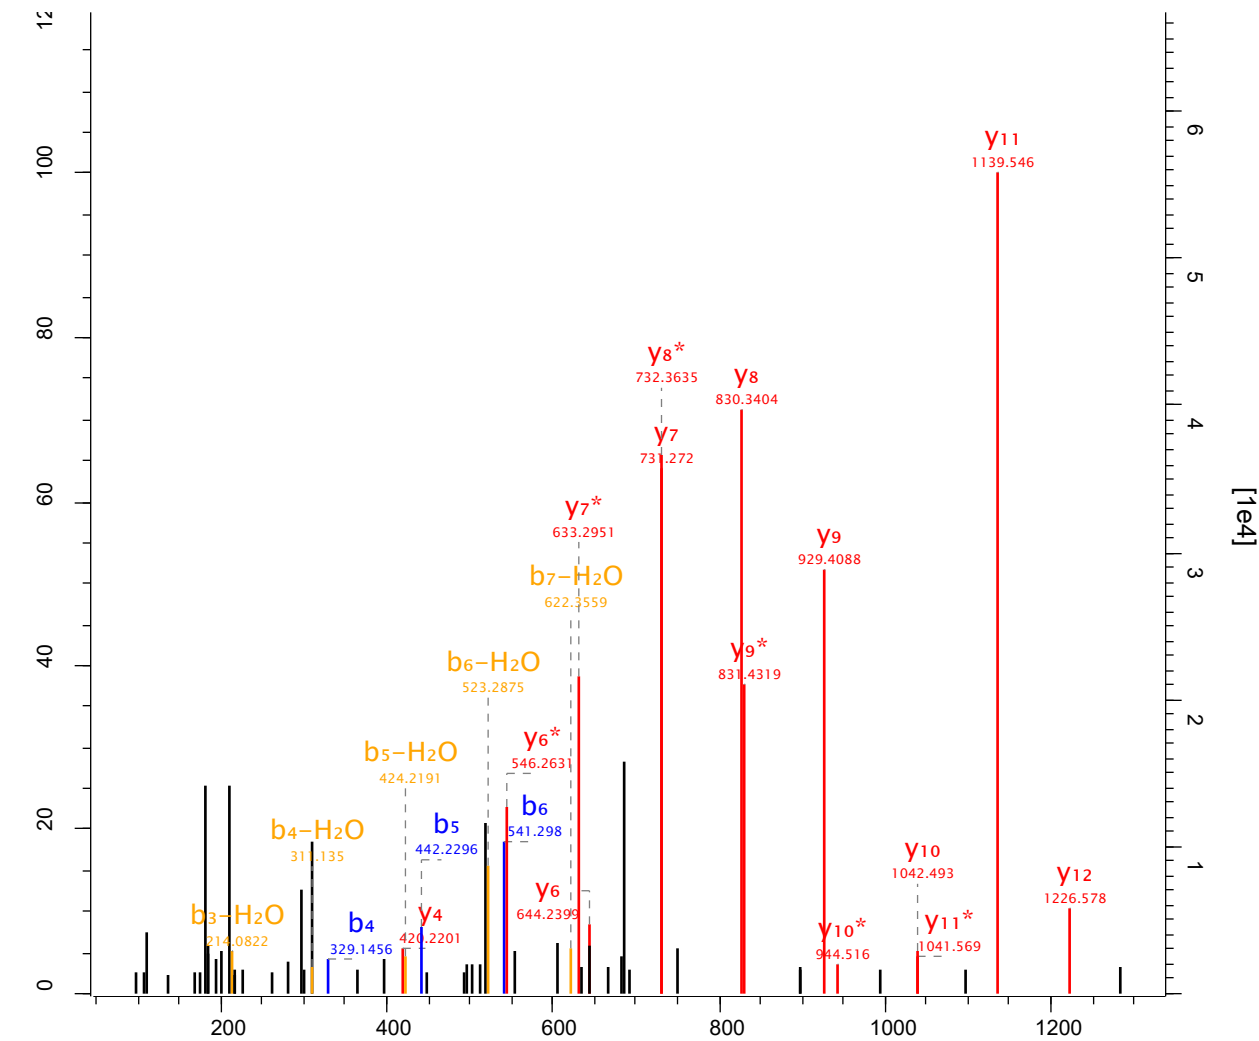

- G S S P I V V S G ph S S G T R -

y12
y11
y10
y9
y8
y7
y6
y4

b4
b5
b6

Raw file Scan Method Score m/z  
 sys\_05\_2 11721 FTMS; HCD 163.33 692.26

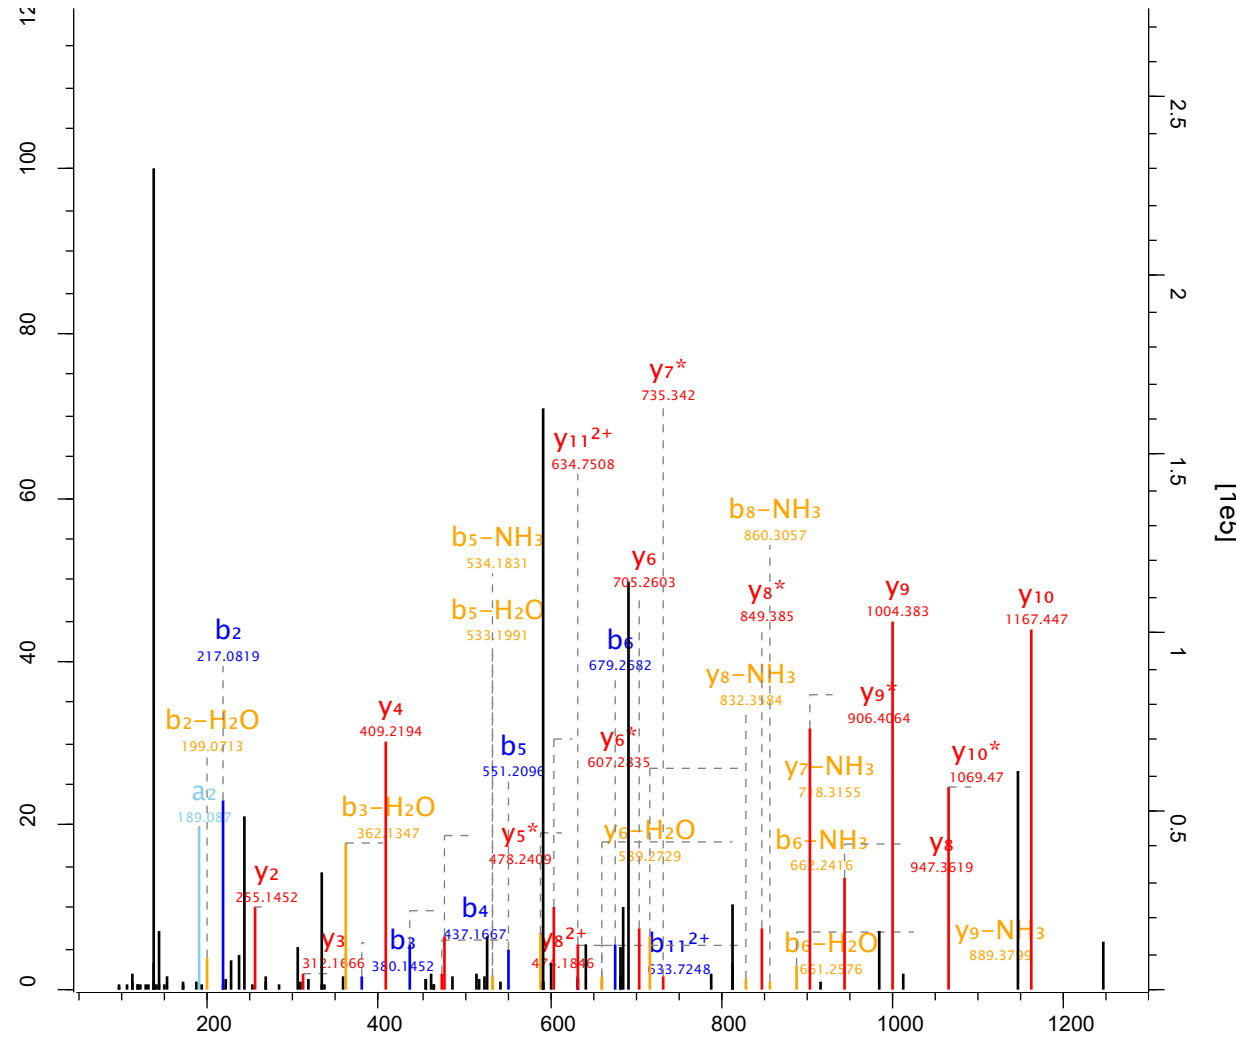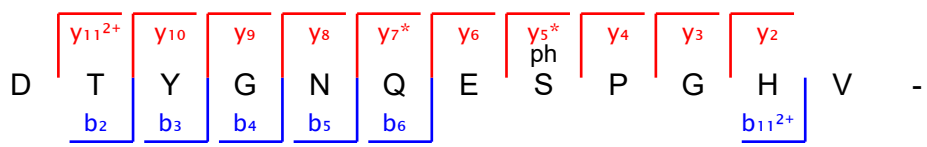

Raw file Scan Method Score m/z  
 sys\_05\_2 11792 FTMS; HCD 132.84 810.78

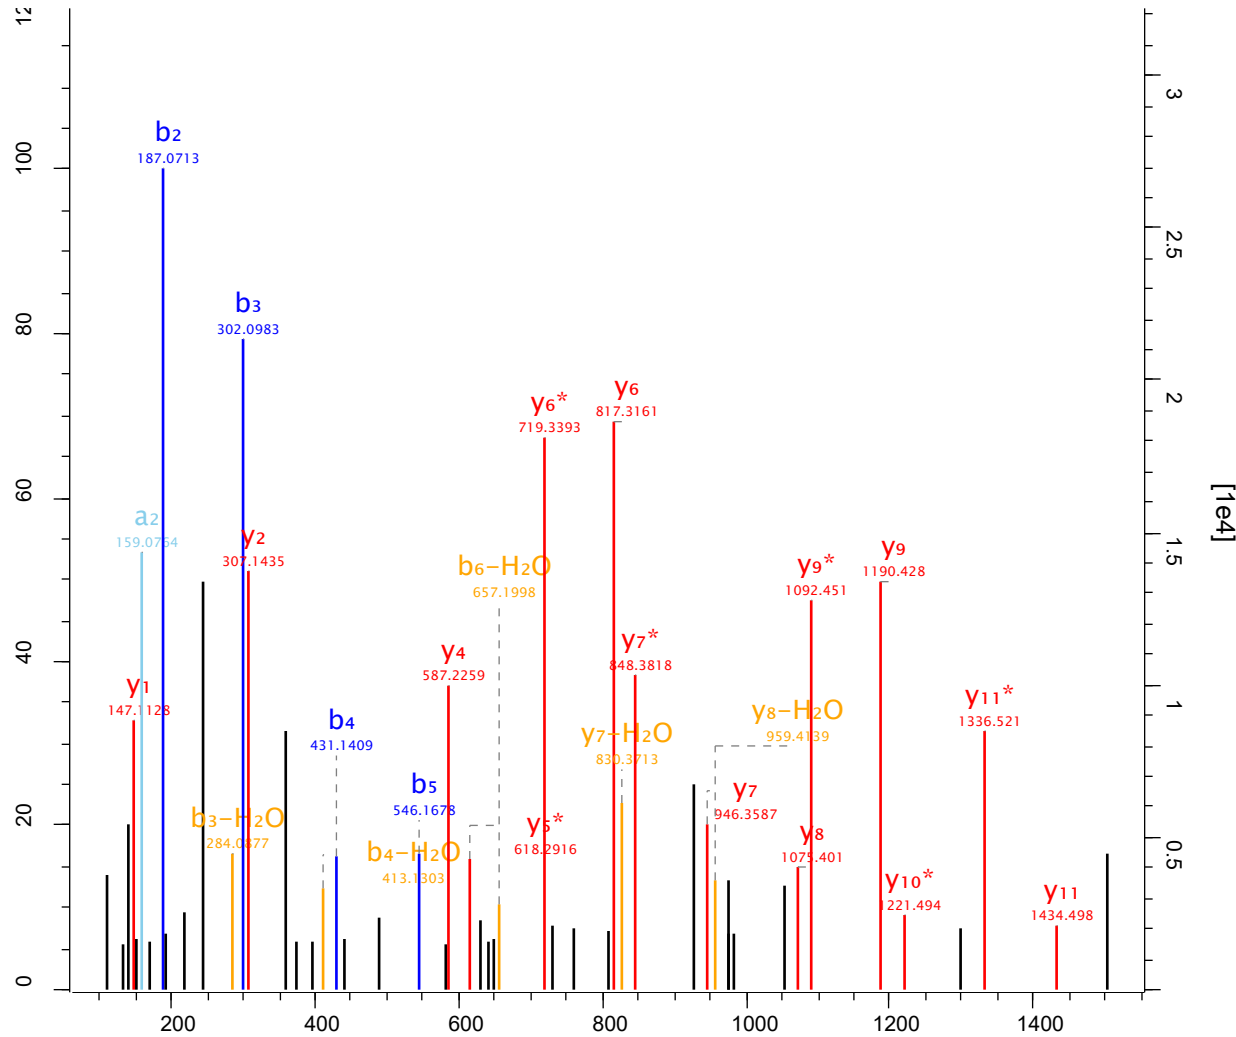

- G E D E D E E T E S L C K -

b<sub>2</sub>
b<sub>3</sub>
b<sub>4</sub>
b<sub>5</sub>
y<sub>11</sub>
y<sub>10</sub>\*
y<sub>9</sub>
y<sub>8</sub>
y<sub>7</sub>
y<sub>6</sub>
y<sub>5</sub>\*
y<sub>4</sub>  
ph
y<sub>2</sub>
y<sub>1</sub>

Raw file Scan Method Score m/z  
 sys\_05\_2 11800 FTMS; HCD 74.24 544.24

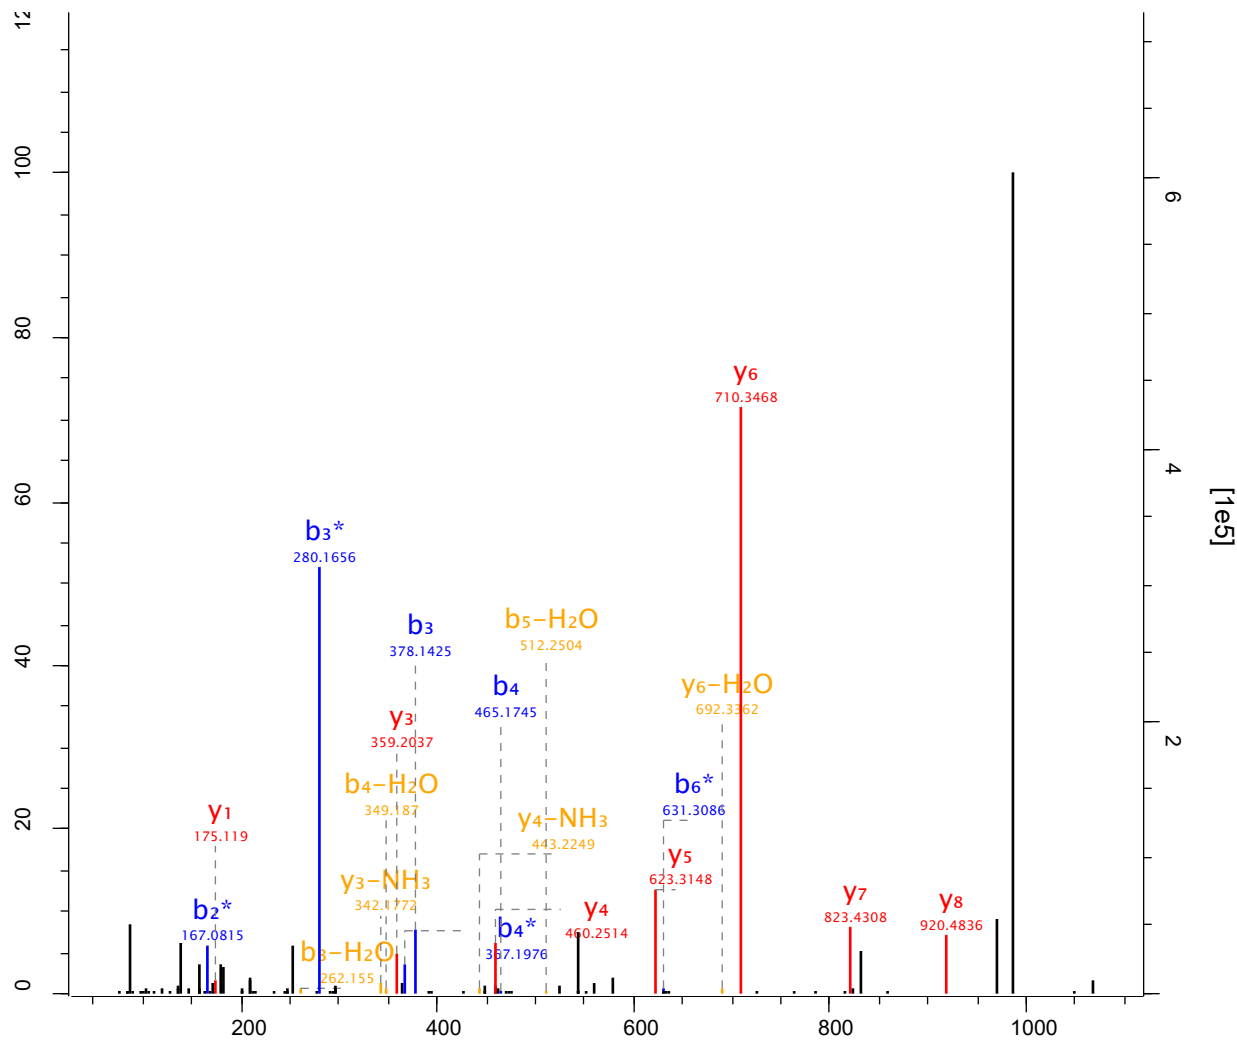

ph S y<sub>8</sub> y<sub>7</sub> y<sub>6</sub> y<sub>5</sub> y<sub>4</sub> y<sub>3</sub> y<sub>1</sub>  
 - S P I S Y T P S R -  
b<sub>2</sub>\* b<sub>3</sub> b<sub>4</sub> b<sub>6</sub>\*

Raw file Scan Method Score m/z  
 sys\_05\_2 12158 FTMS; HCD 76.94 505.72

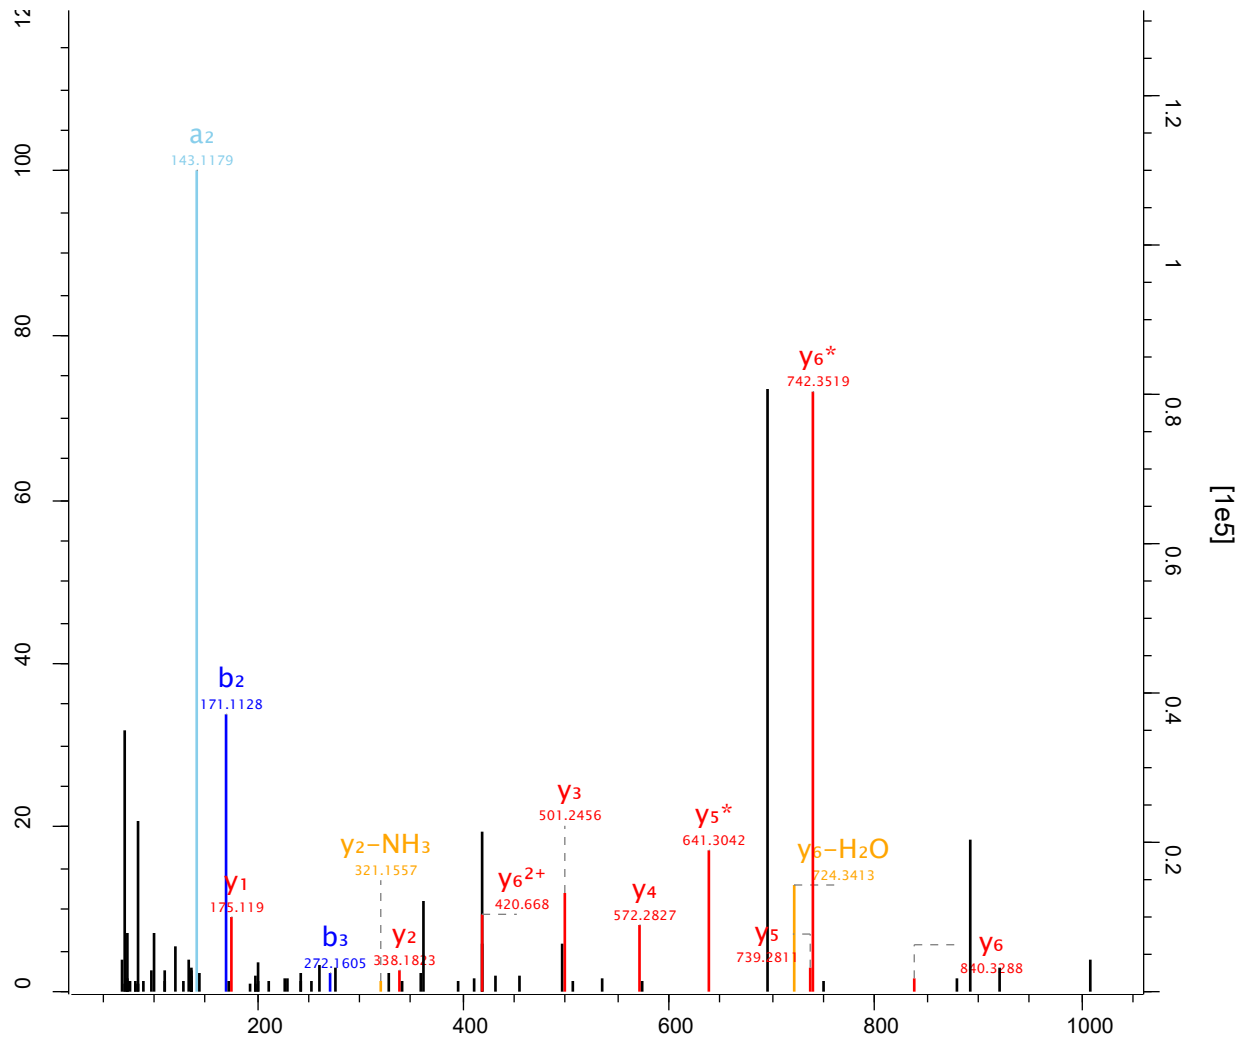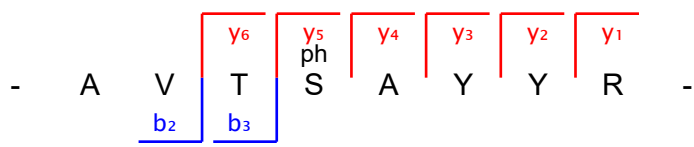

Raw file Scan Method Score m/z  
 sys\_05\_2 12330 FTMS; HCD 112.3 466.18

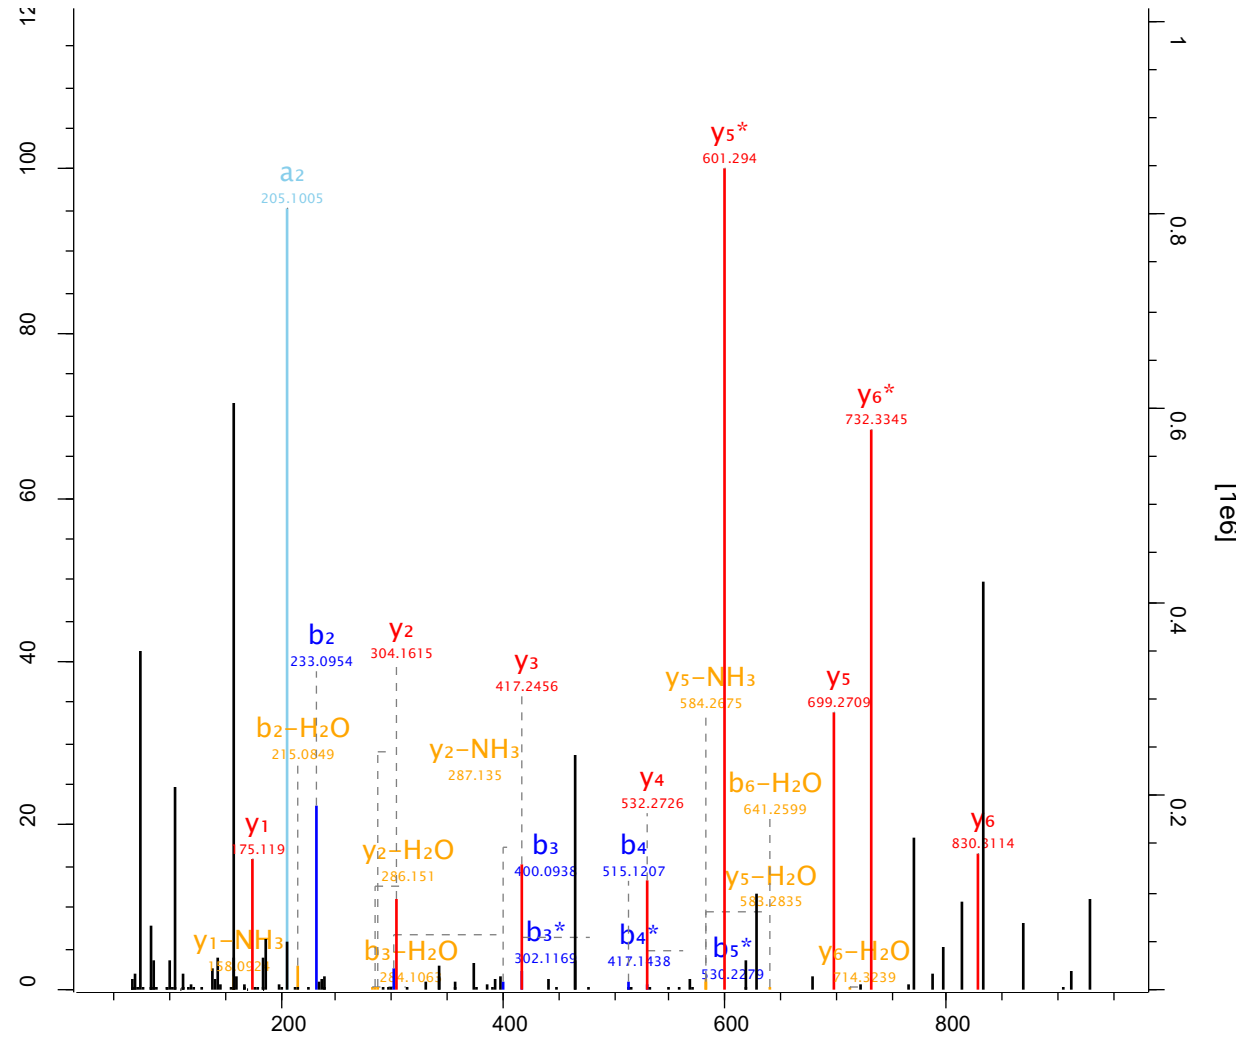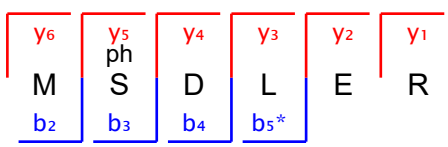

Raw file Scan Method Score m/z  
 sys\_05\_2 12433 FTMS; HCD 73.44 507.23

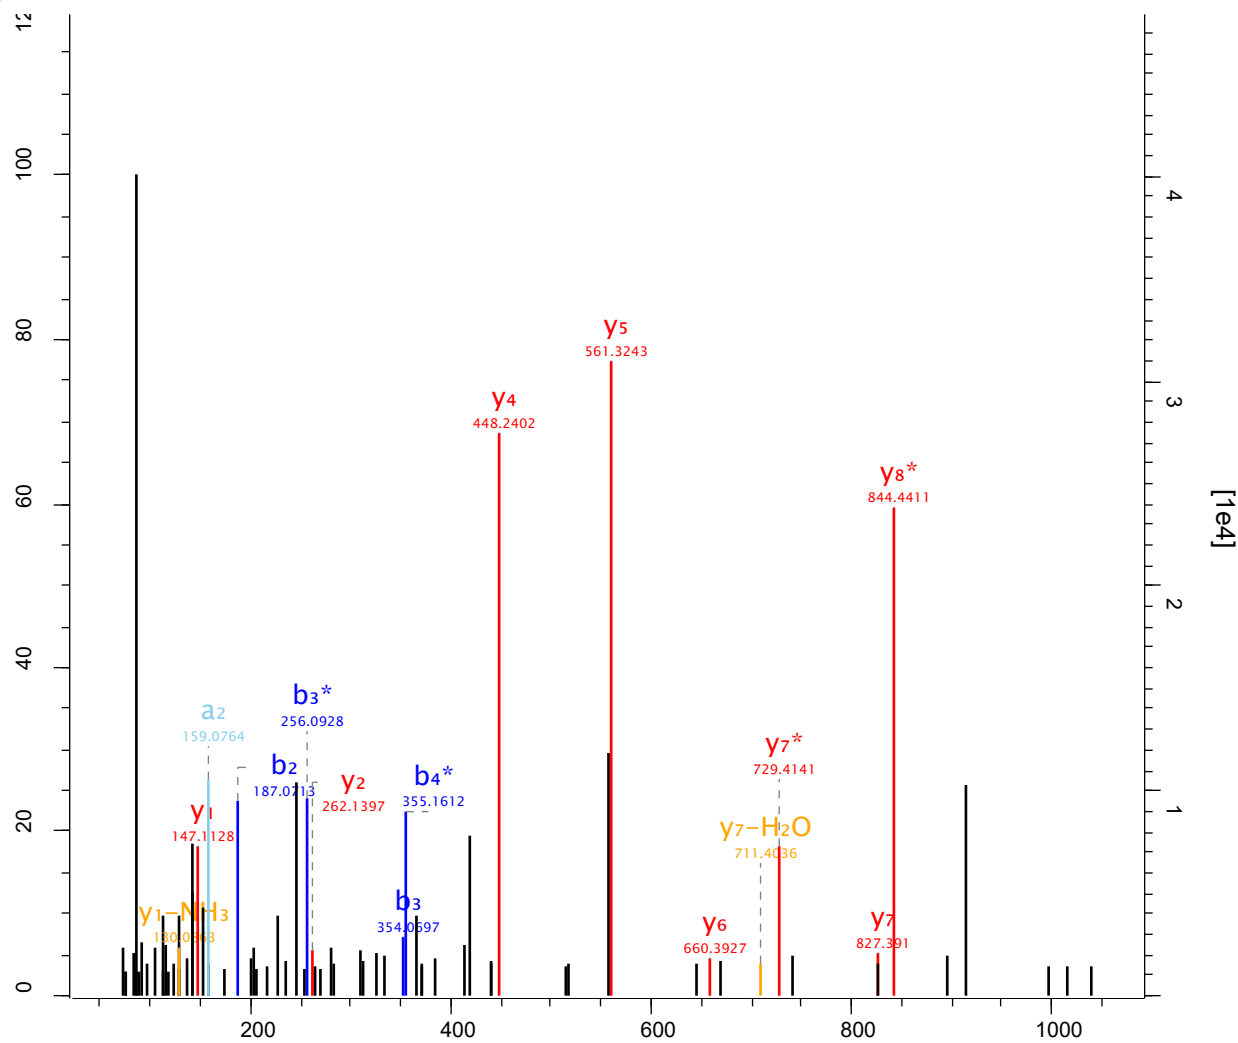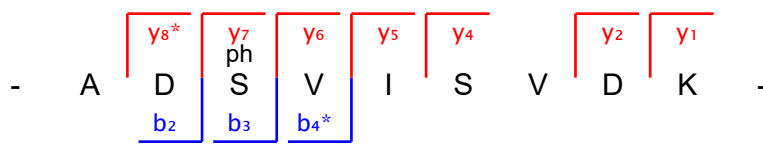



Raw file Scan Method Score m/z  
 sys\_05\_2 12642 FTMS; HCD 145.9 436.7

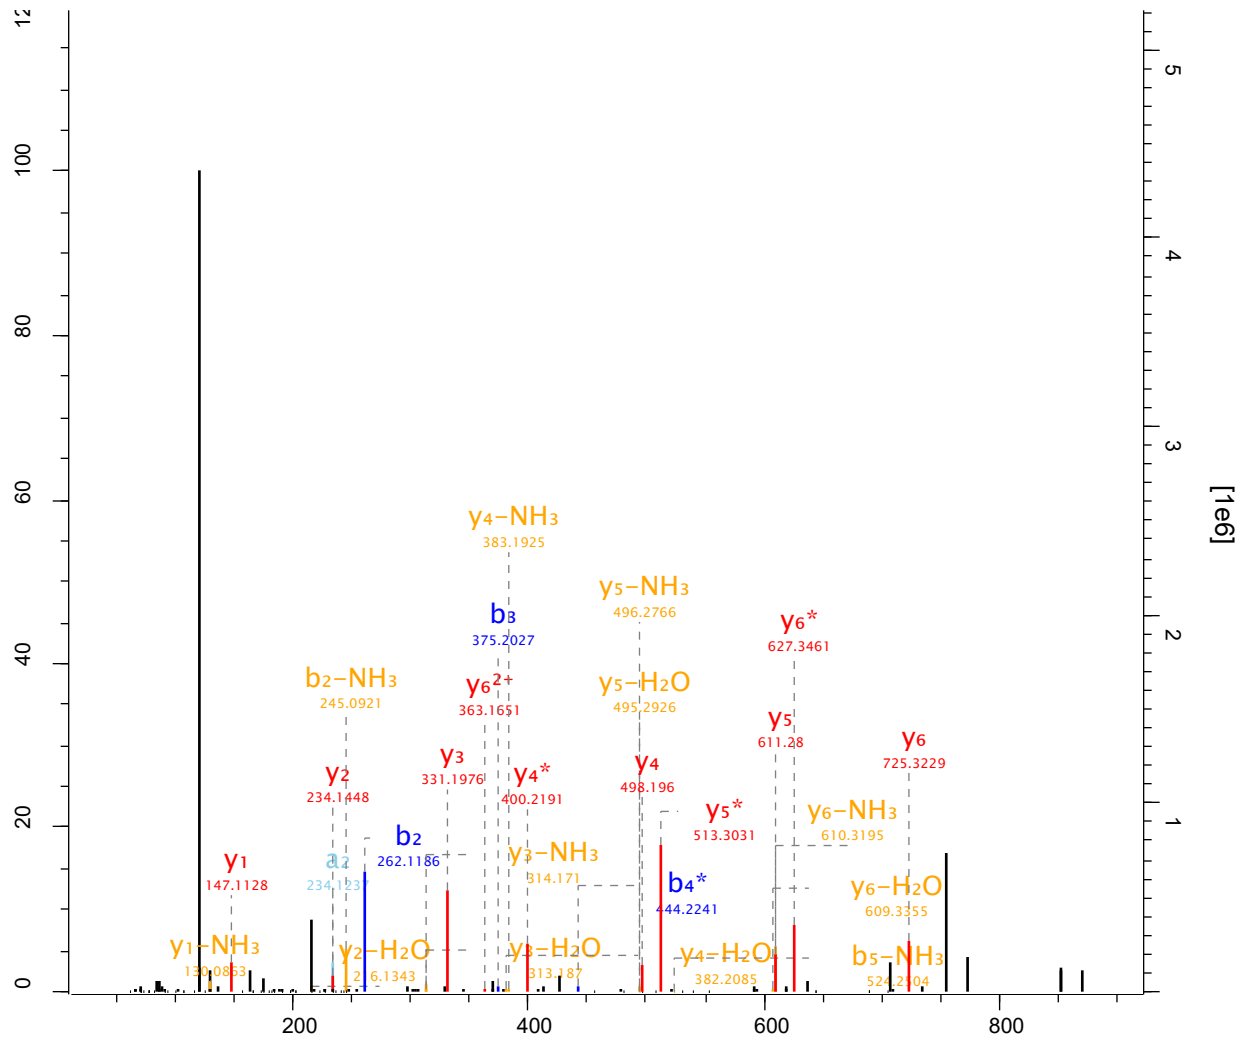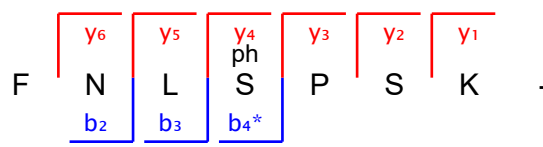

Raw file Scan Method Score m/z  
 sys\_05\_2 12954 FTMS; HCD 140.22 730.31

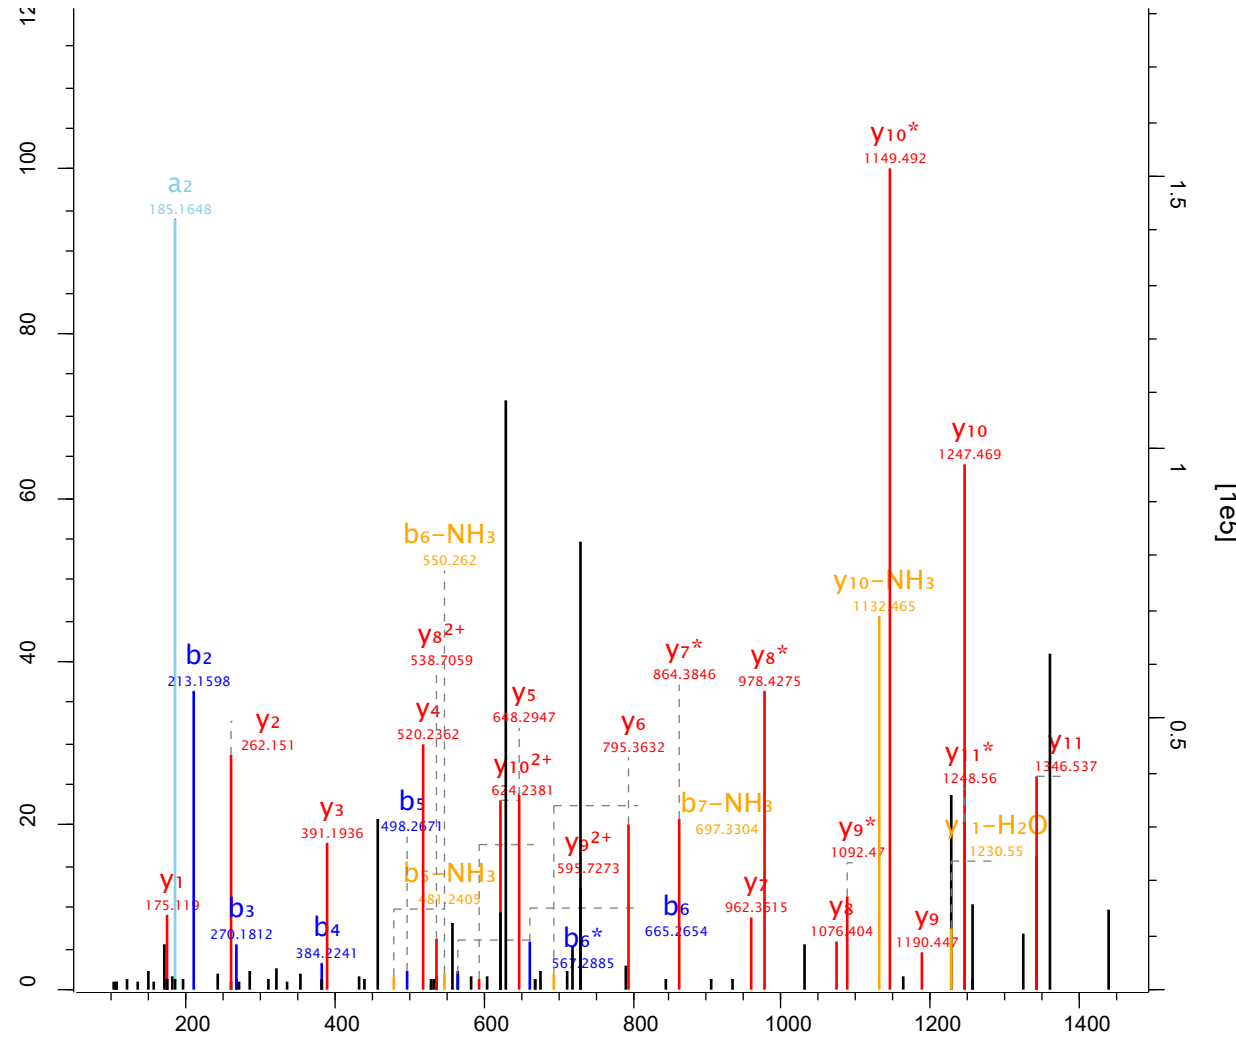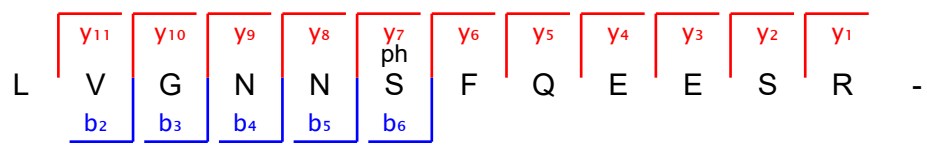

Raw file Scan Method Score m/z  
 sys\_05\_2 12994 FTMS; HCD 109.07 632.81

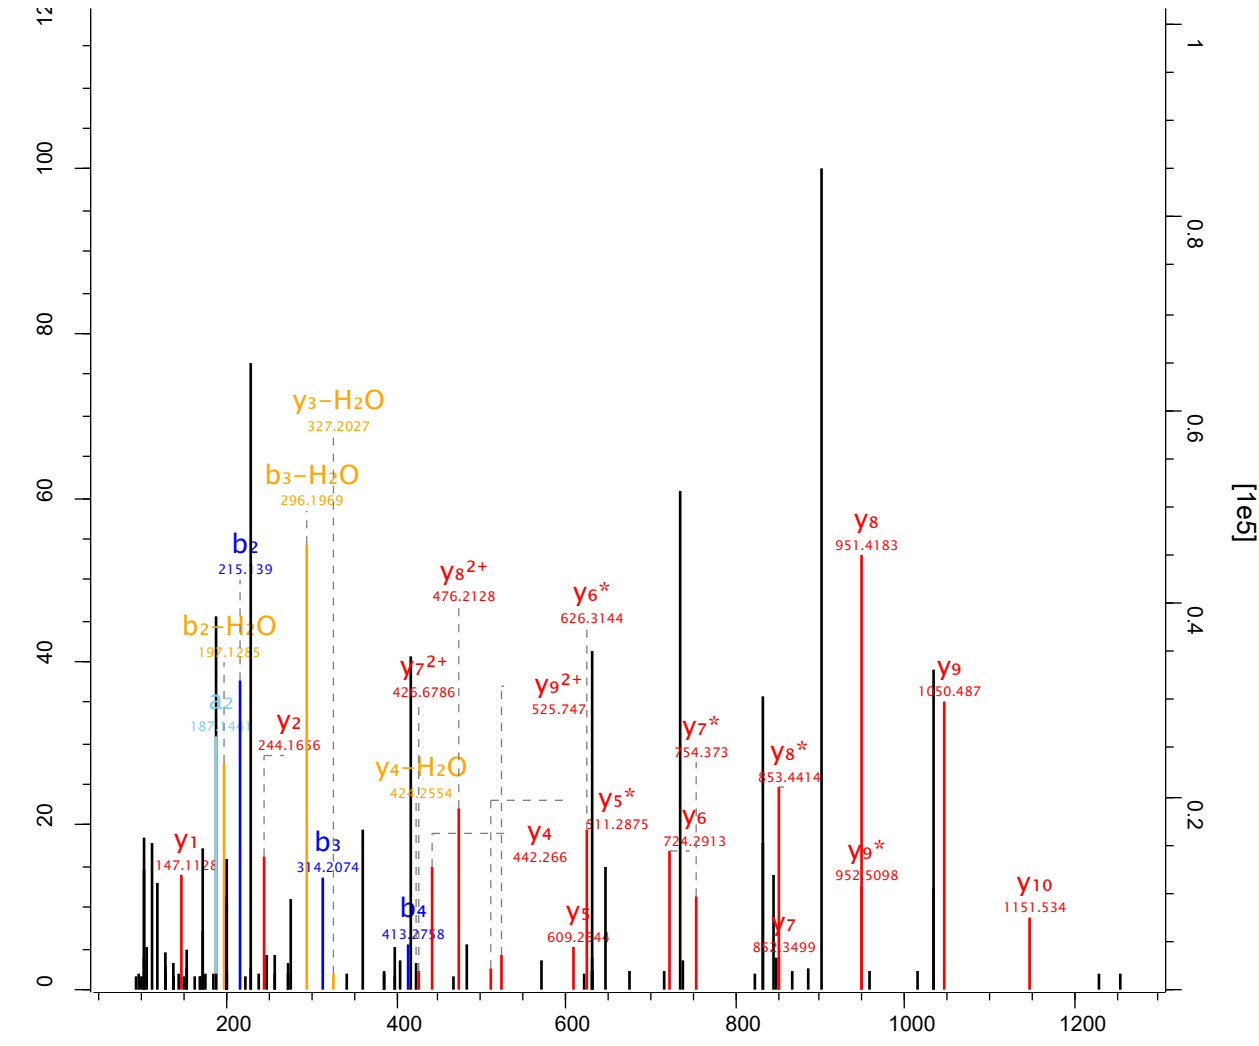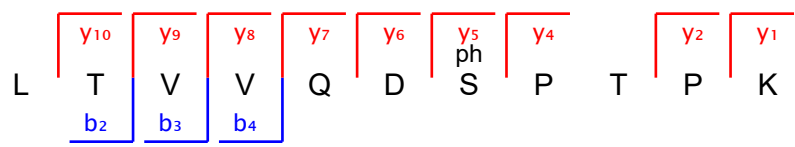



Raw file Scan Method Score m/z  
 sys\_05\_2 13047 FTMS; HCD 117.2 531.73

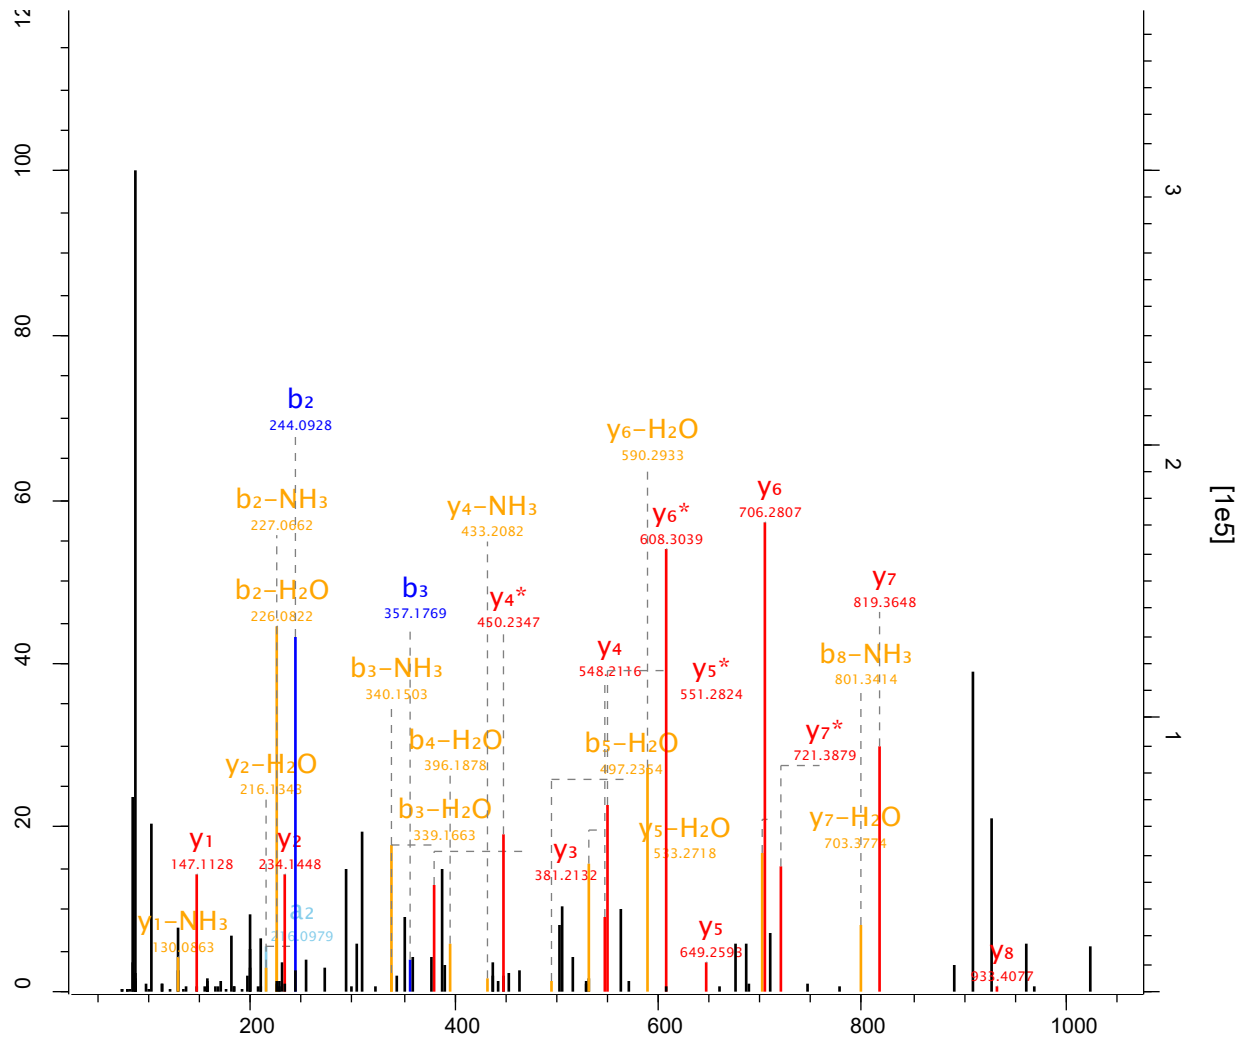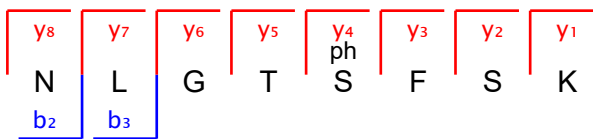

Raw file Scan Method Score m/z  
 sys\_05\_2 13109 FTMS; HCD 188.81 563.24

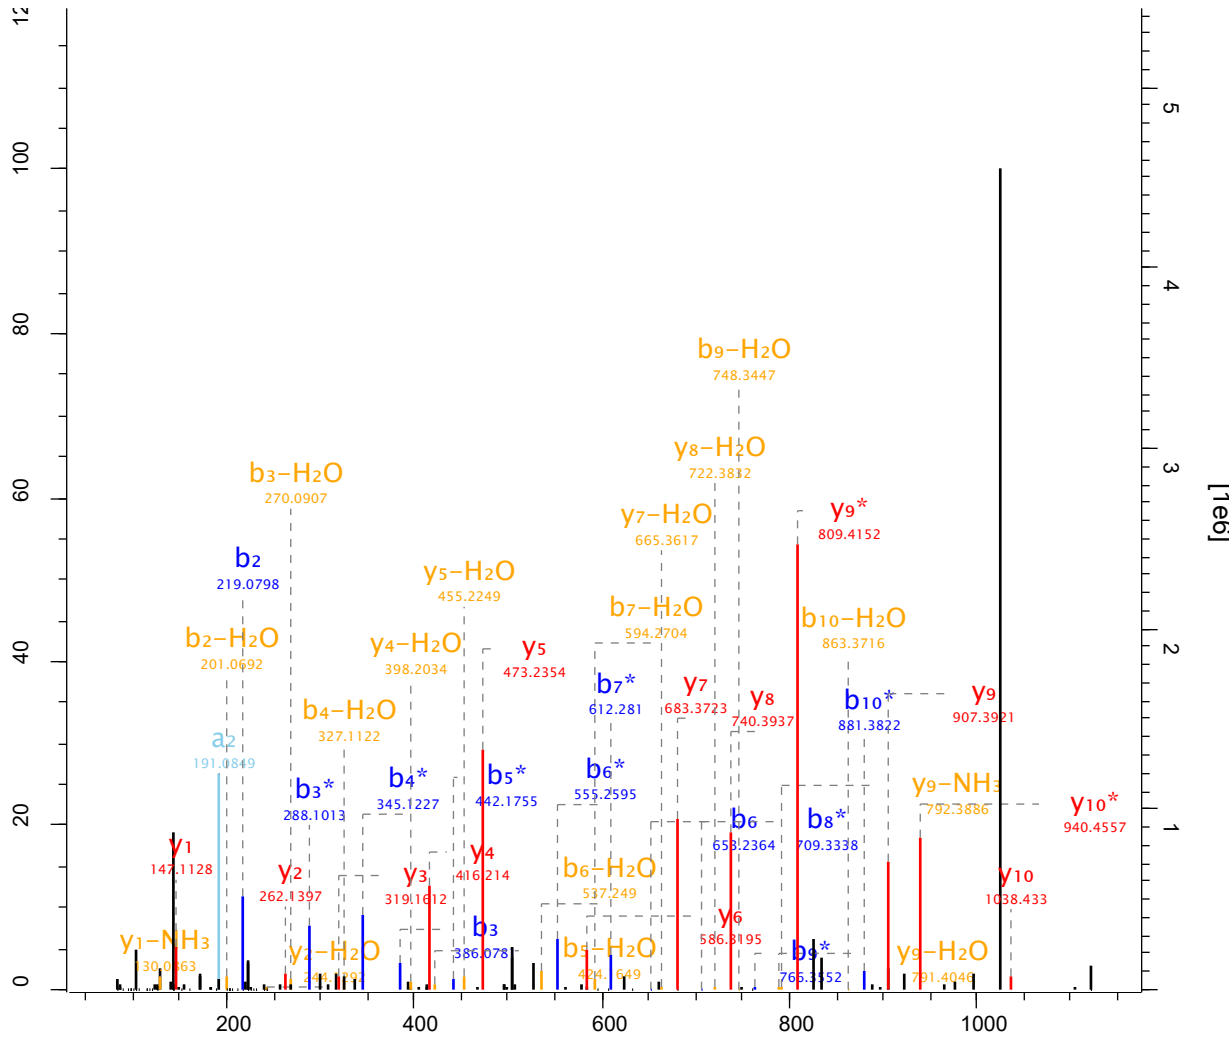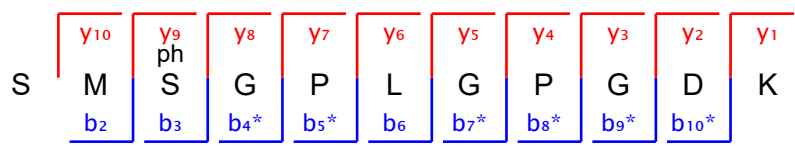



Raw file Scan Method Score m/z  
 sys\_05\_2 13141 FTMS; HCD 55.75 760.77

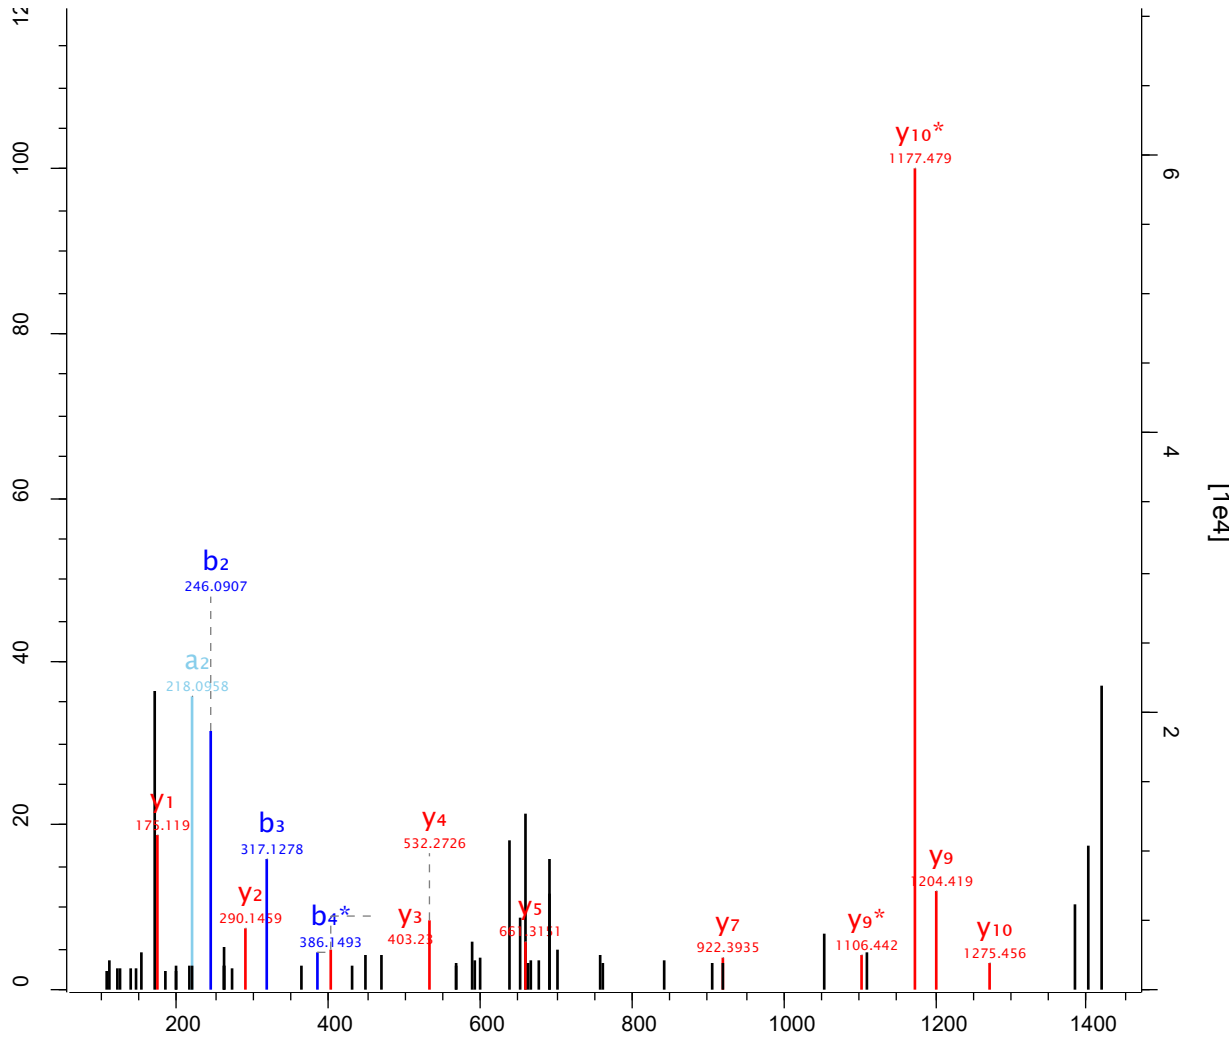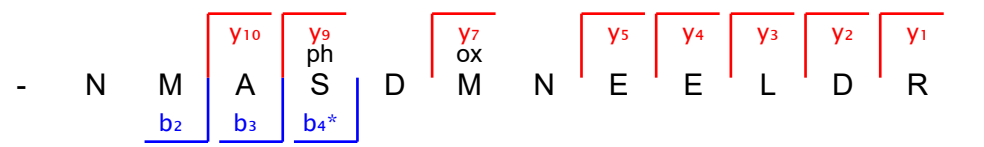



Raw file Scan Method Score m/z  
 sys\_05\_2 13184 FTMS; HCD 142.1 572.24

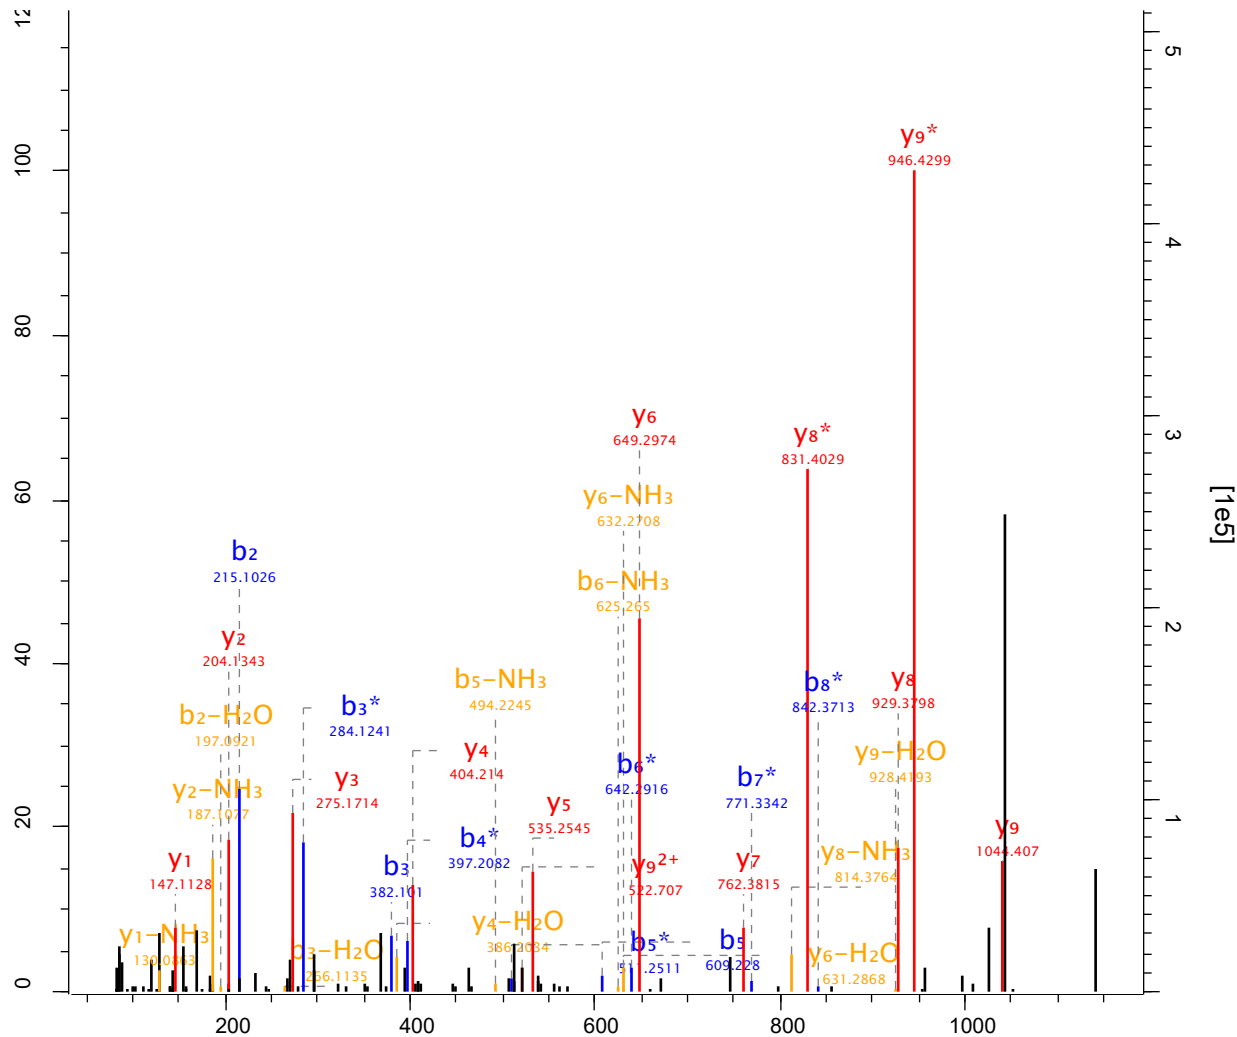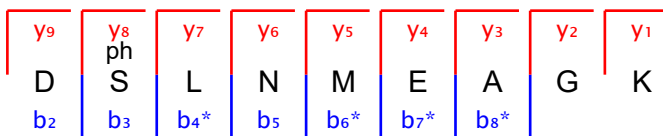

Raw file Scan Method Score m/z  
 sys\_05\_2 13306 FTMS; HCD 113.65 645.78

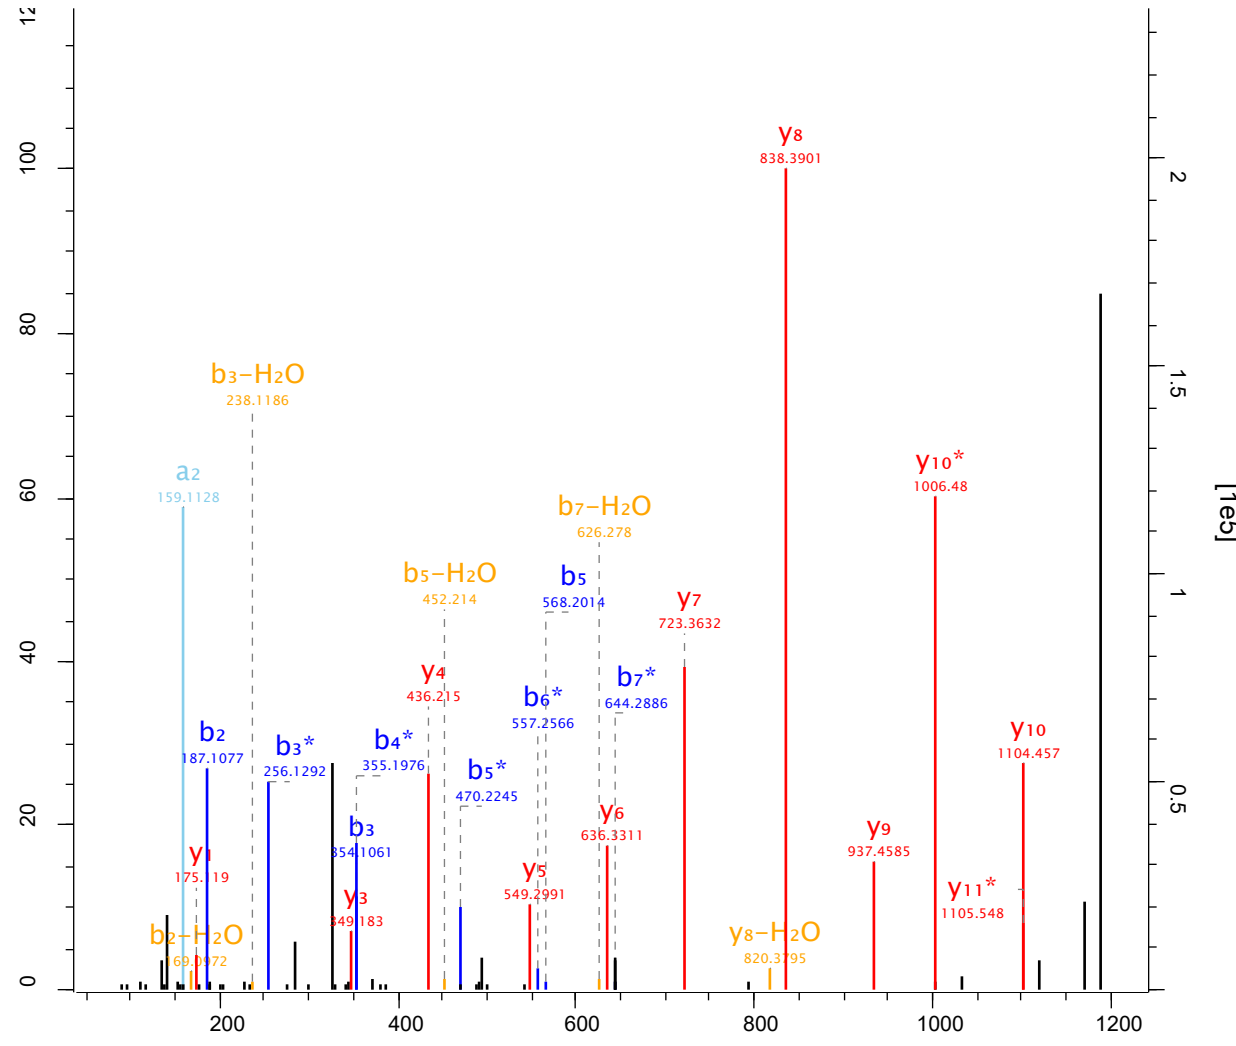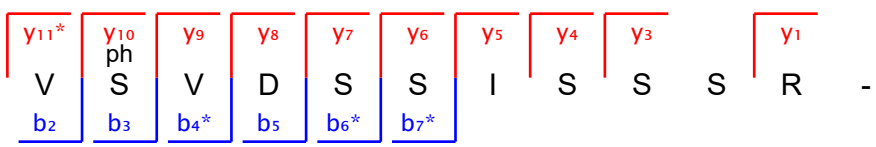

Raw file Scan Method Score m/z  
 sys\_05\_2 13556 FTMS; HCD 81.52 500.22

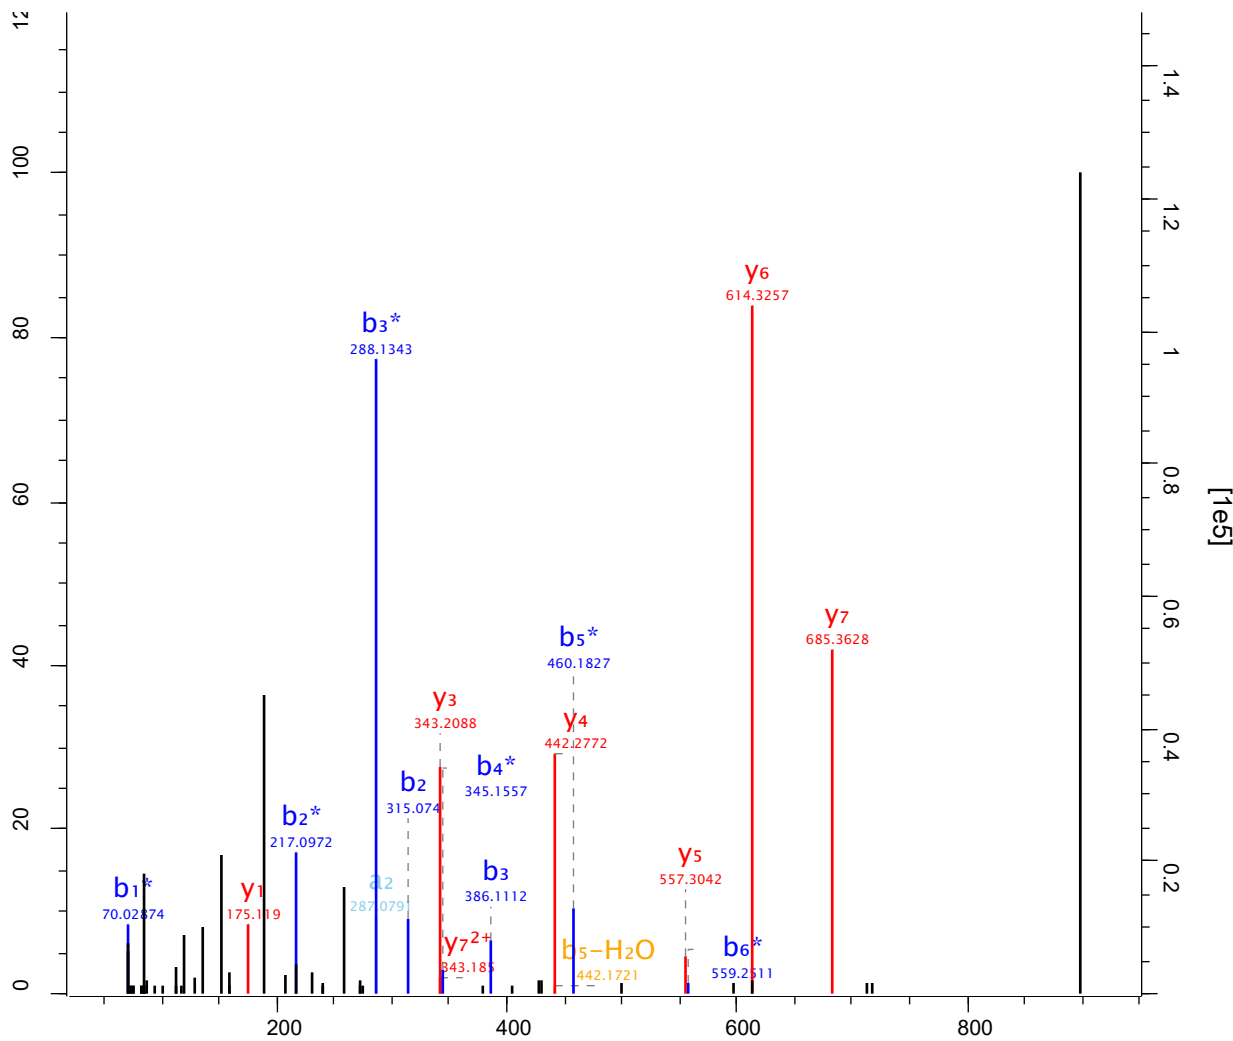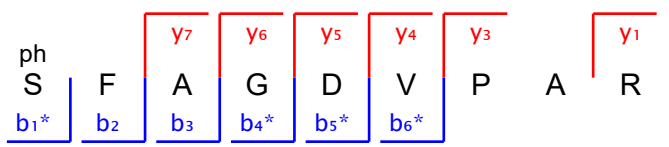

Raw file Scan Method Score m/z  
 sys\_05\_2 13614 FTMS; HCD 94.47 508.74

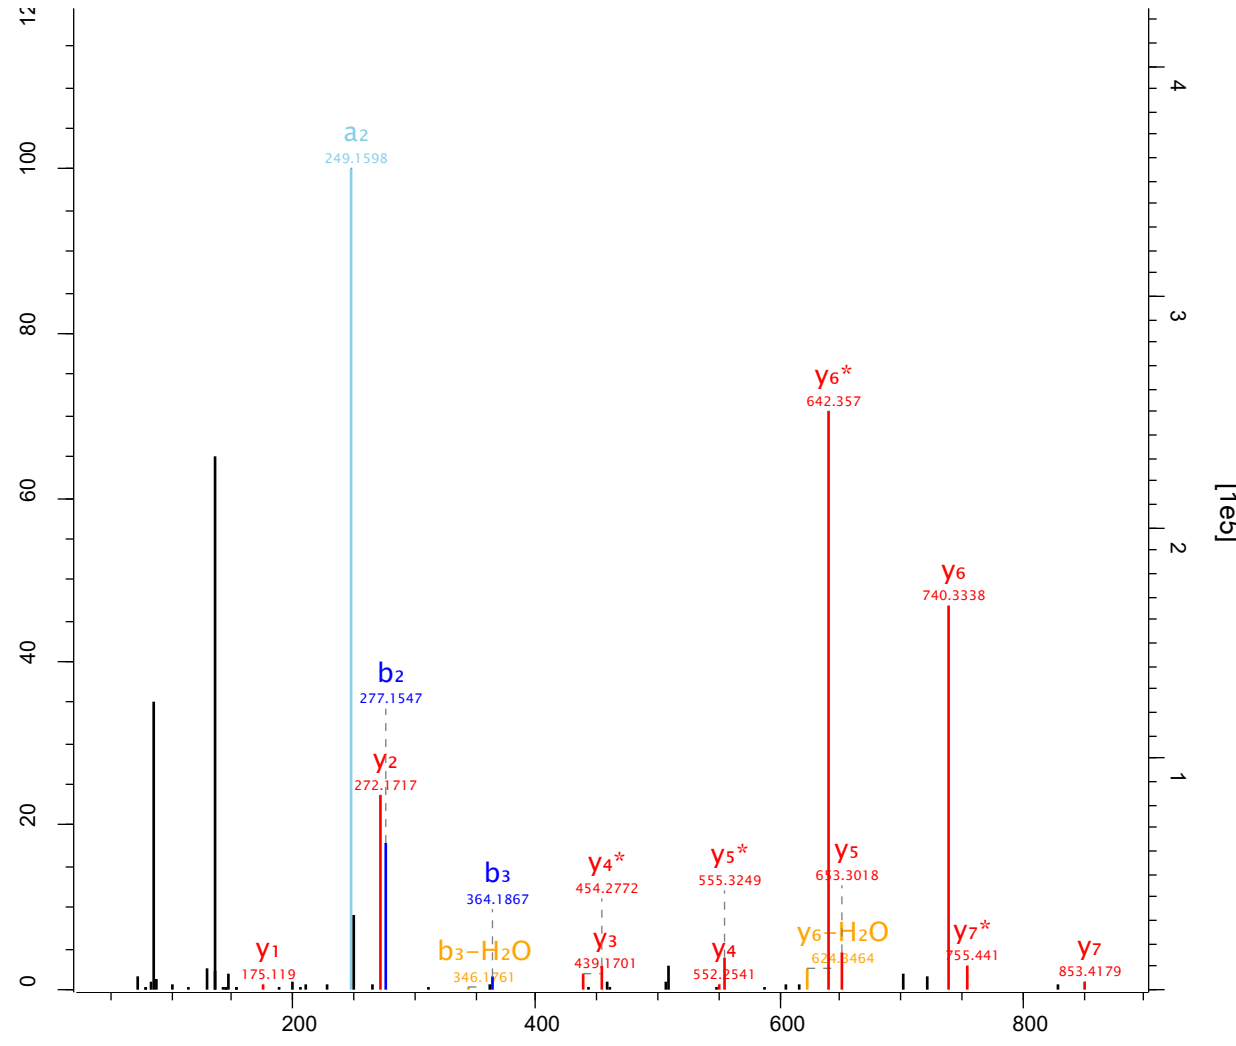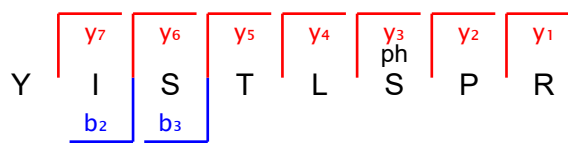

Raw file Scan Method Score m/z  
 sys\_05\_2 13695 FTMS; HCD 116.73 892.87

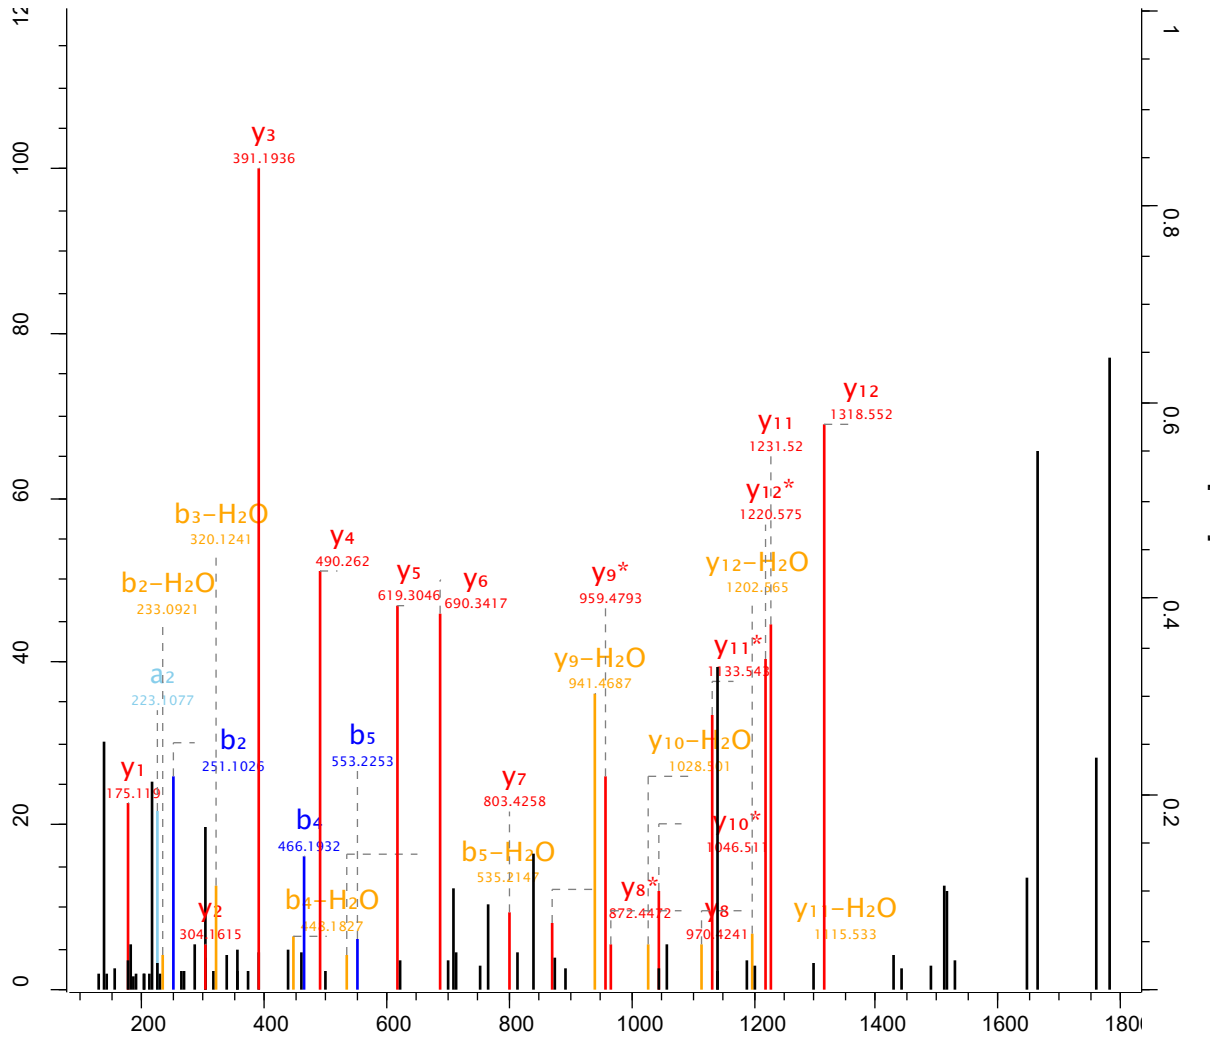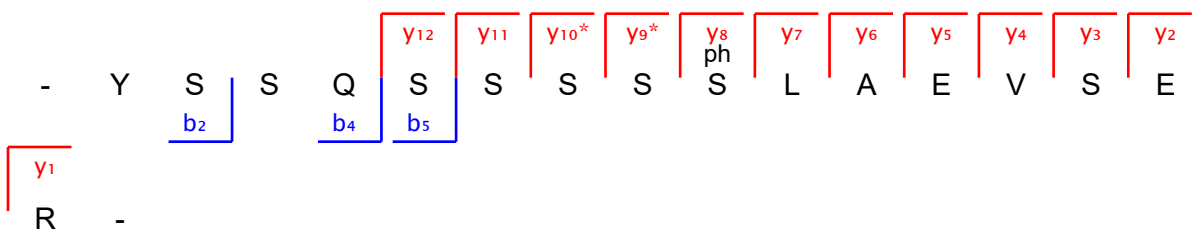

Raw file Scan Method Score m/z  
 sys\_05\_2 13725 FTMS; HCD 108.77 786.33

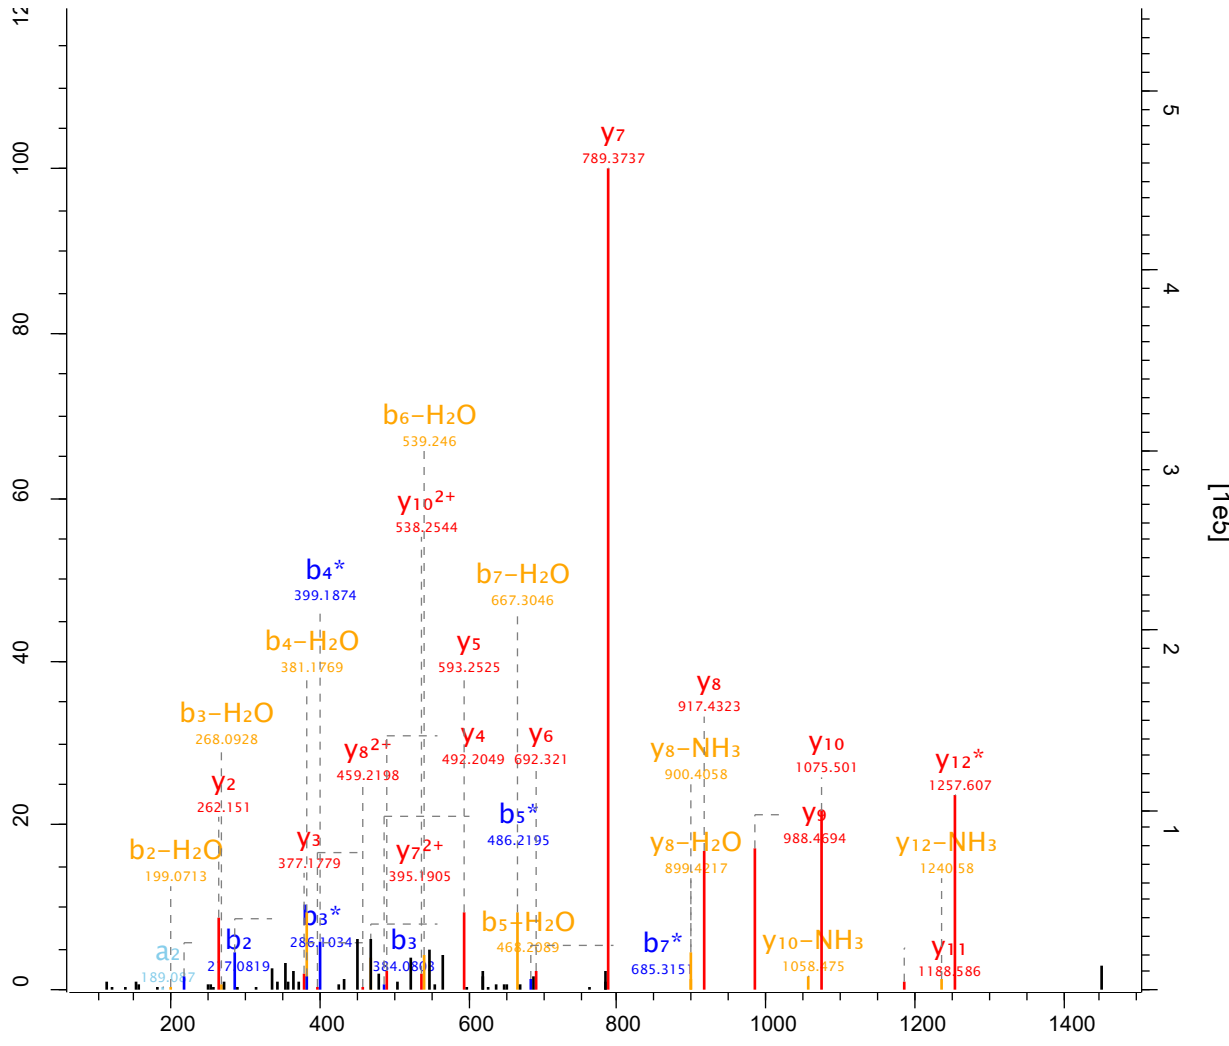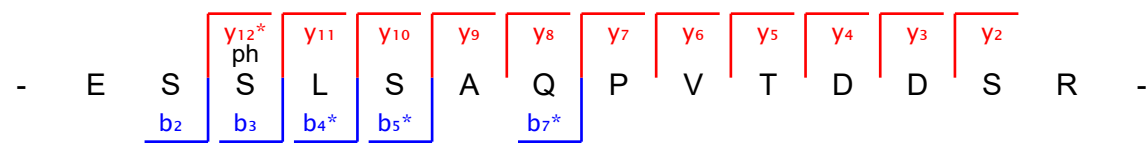

Raw file Scan Method Score m/z  
 sys\_05\_2 13869 FTMS; HCD 107.09 528.24

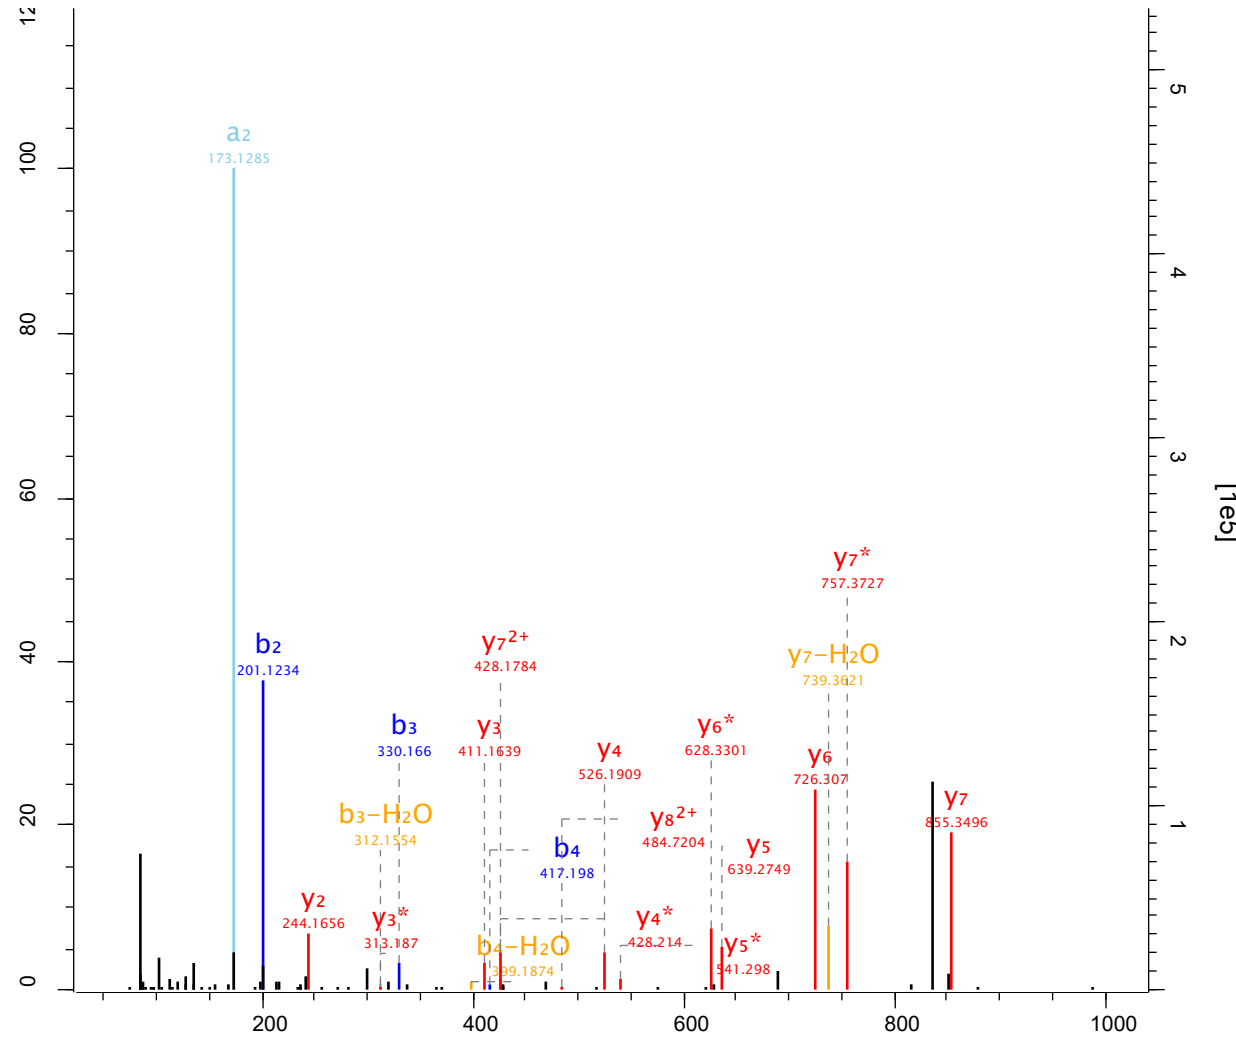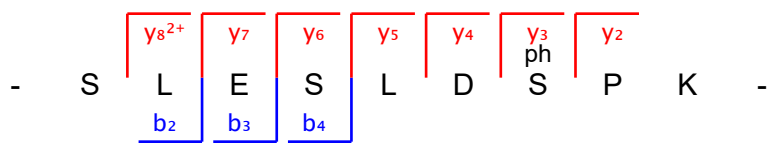

Raw file Scan Method Score m/z  
 sys\_05\_2 13916 FTMS; HCD 47.71 586.24

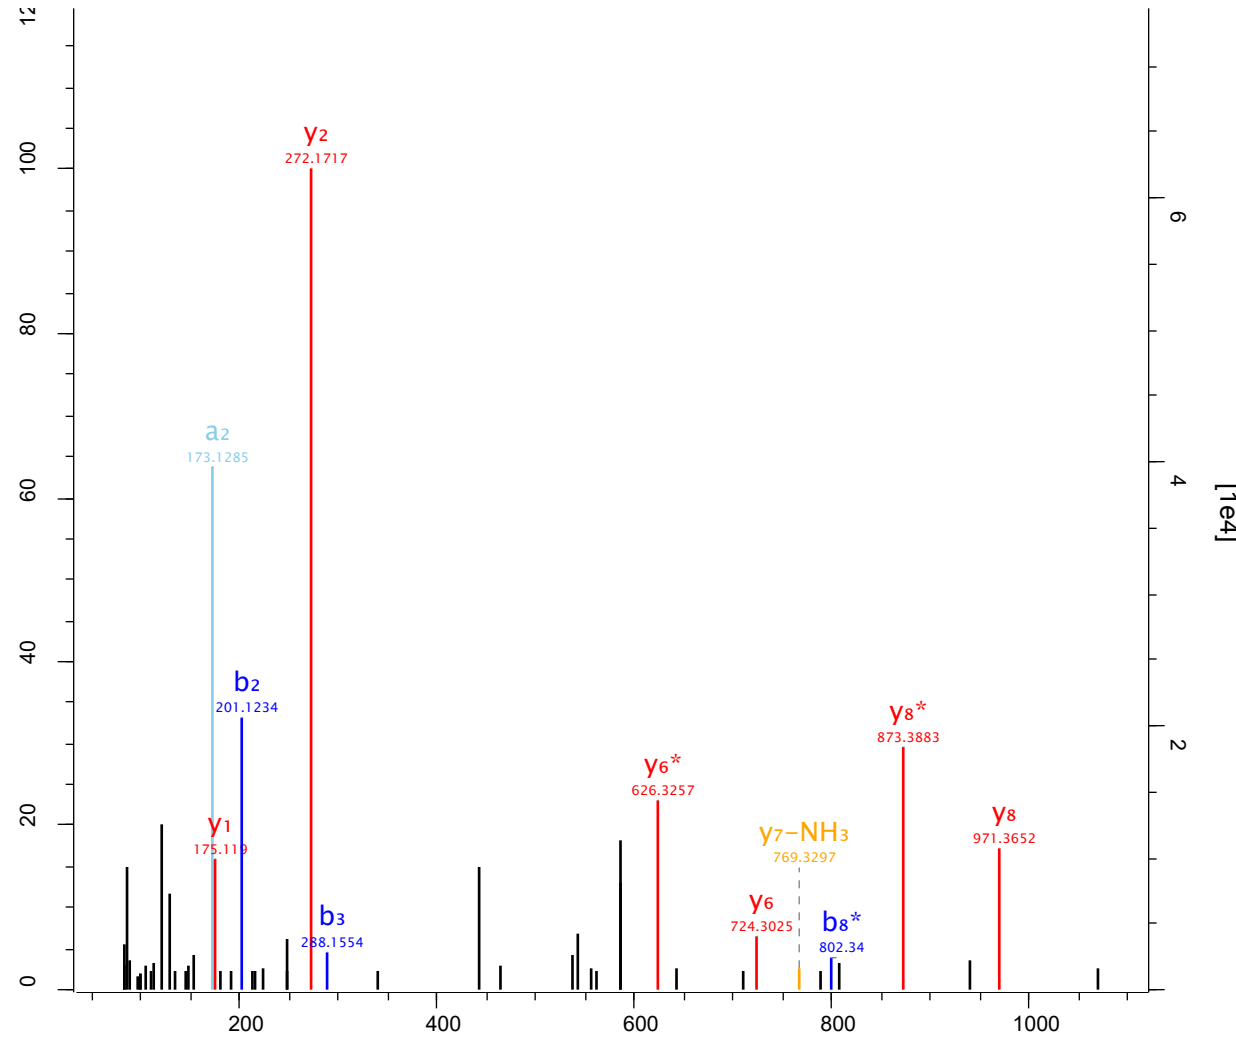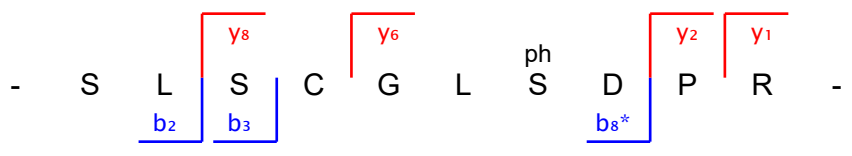



Raw file Scan Method Score m/z  
 sys\_05\_2 13946 FTMS; HCD 231.38 728.34

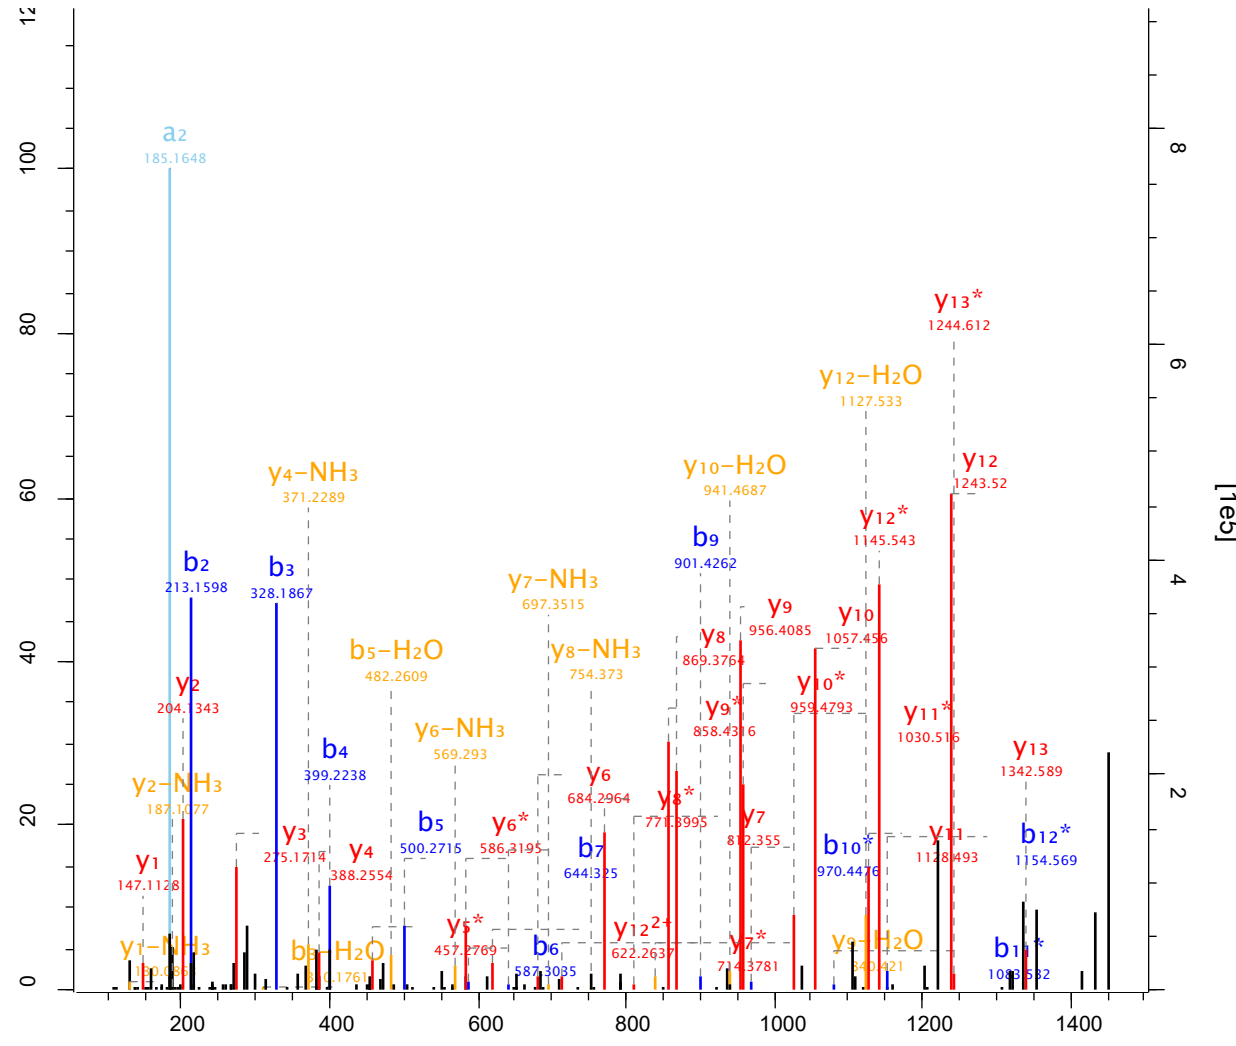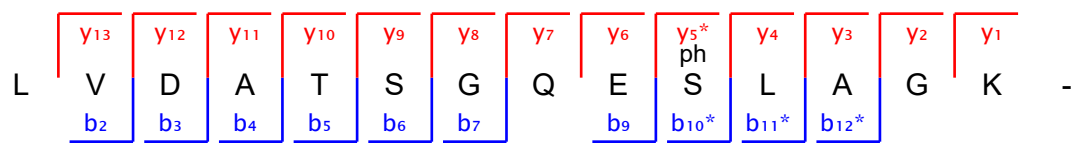

Raw file Scan Method Score m/z  
 sys\_05\_2 13977 FTMS; HCD 225.3 861.35

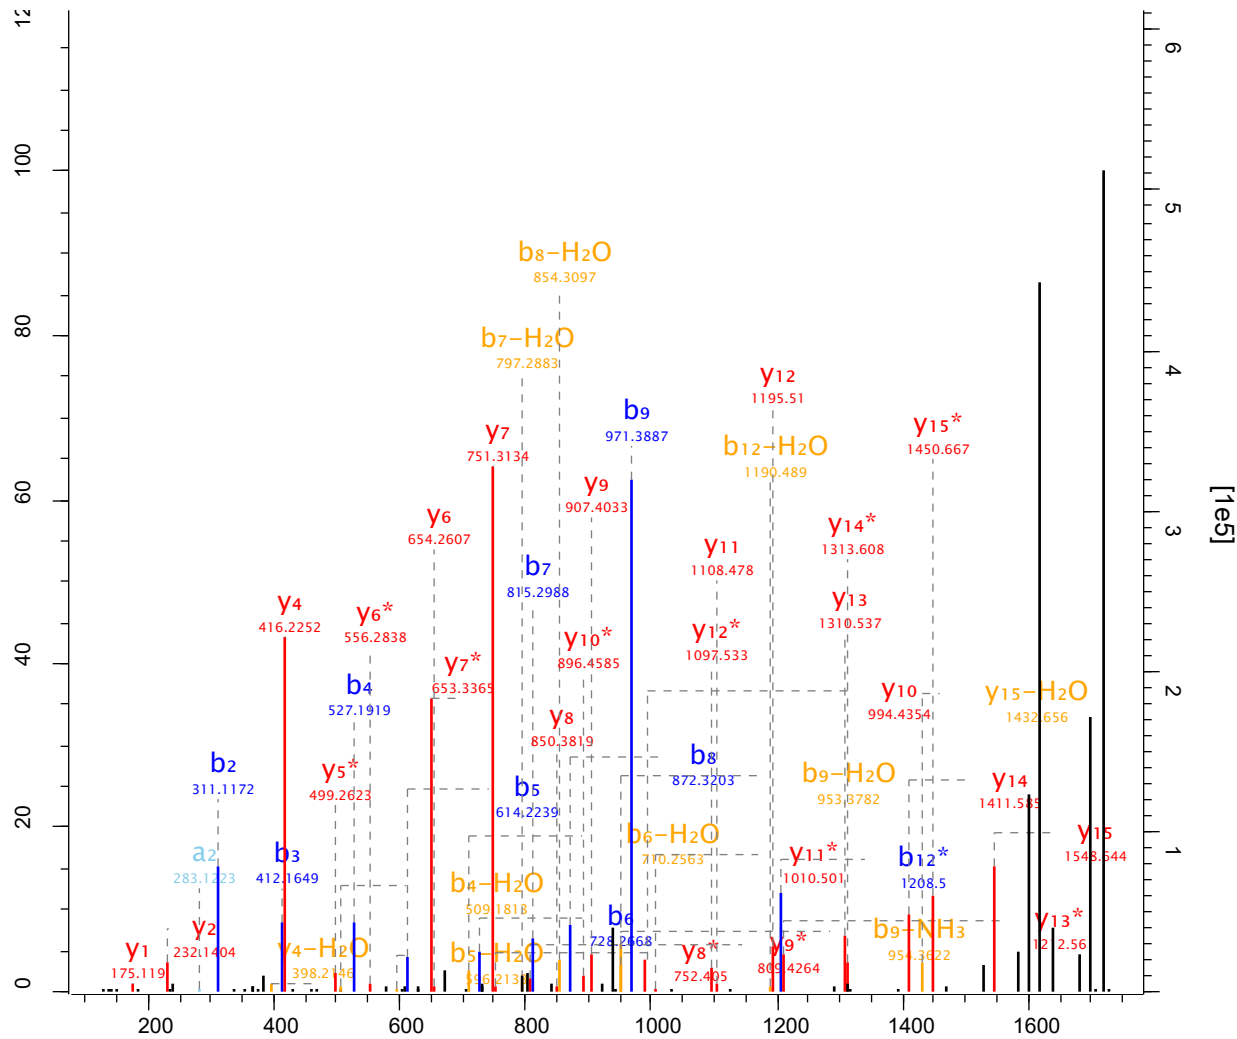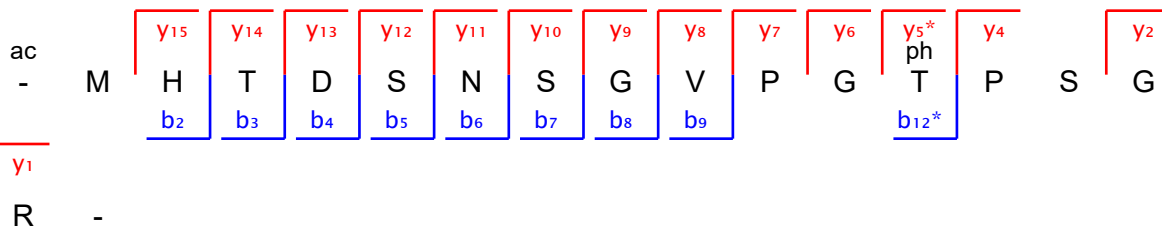

Raw file Scan Method Score m/z  
 sys\_05\_2 13988 FTMS; HCD 186.08 662.27

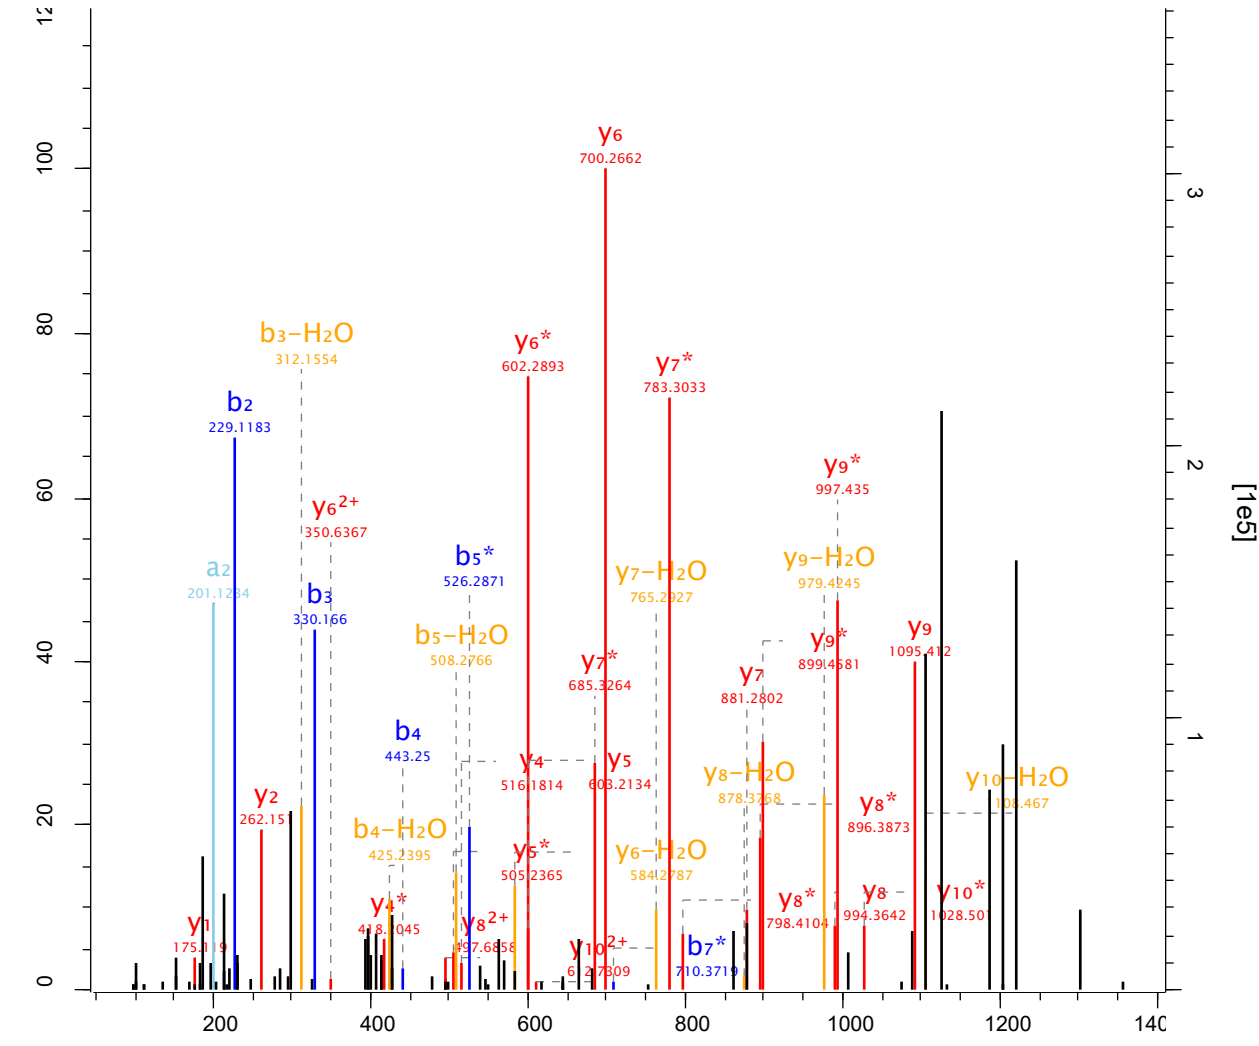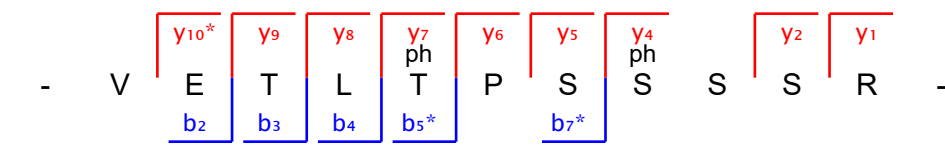

Raw file Scan Method Score m/z  
 sys\_05\_2 14017 FTMS; HCD 49.47 483.71

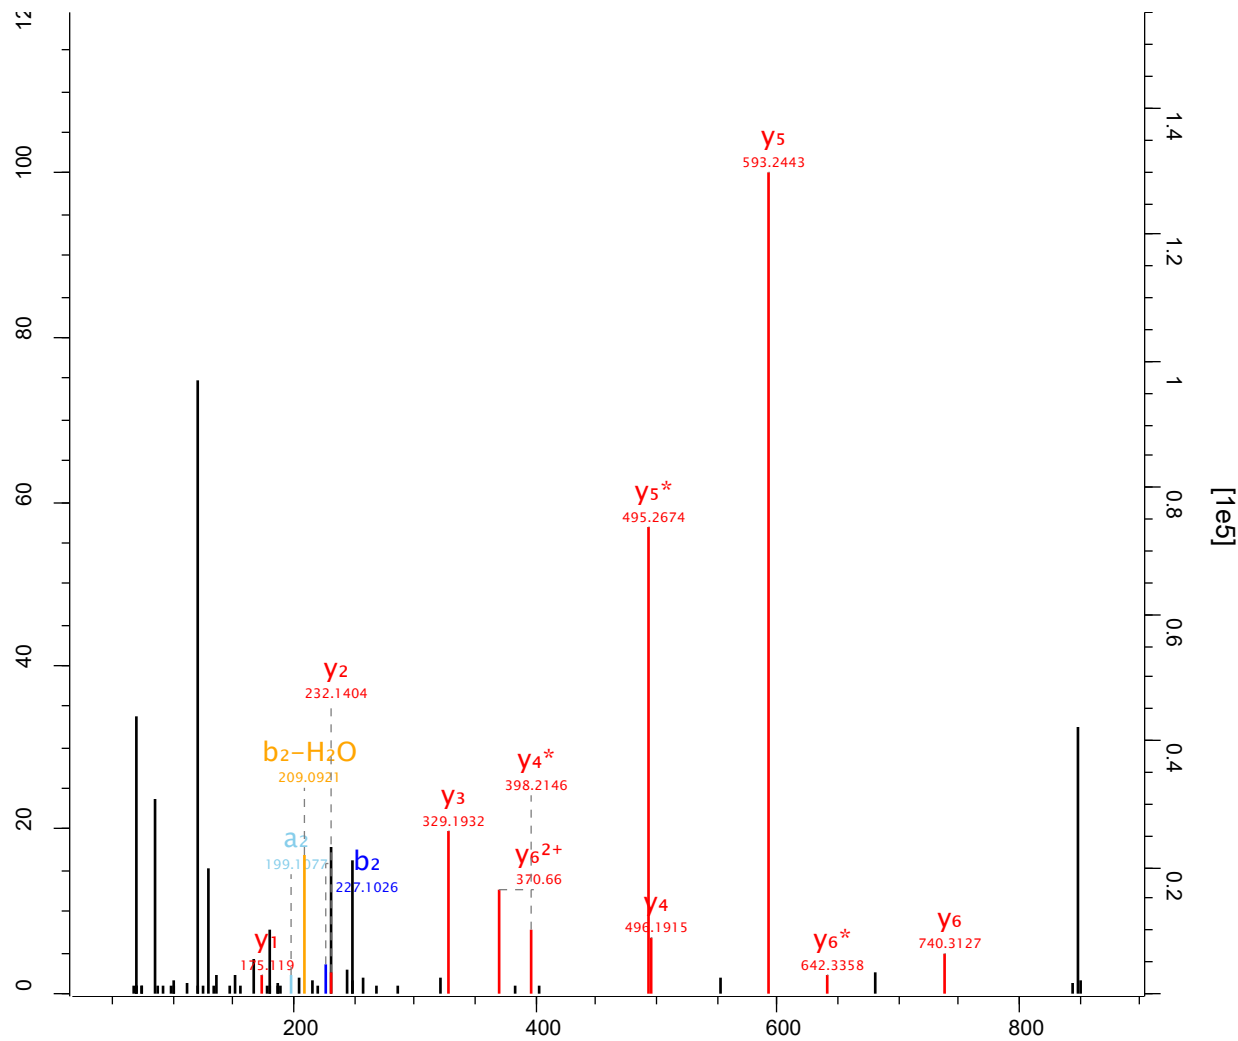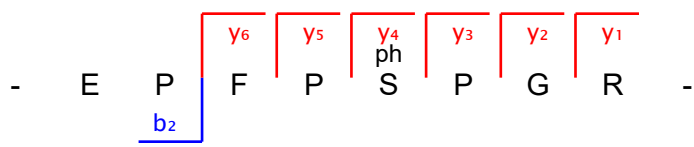

Raw file Scan Method Score m/z  
 sys\_05\_2 14170 FTMS; HCD 192.46 693.31

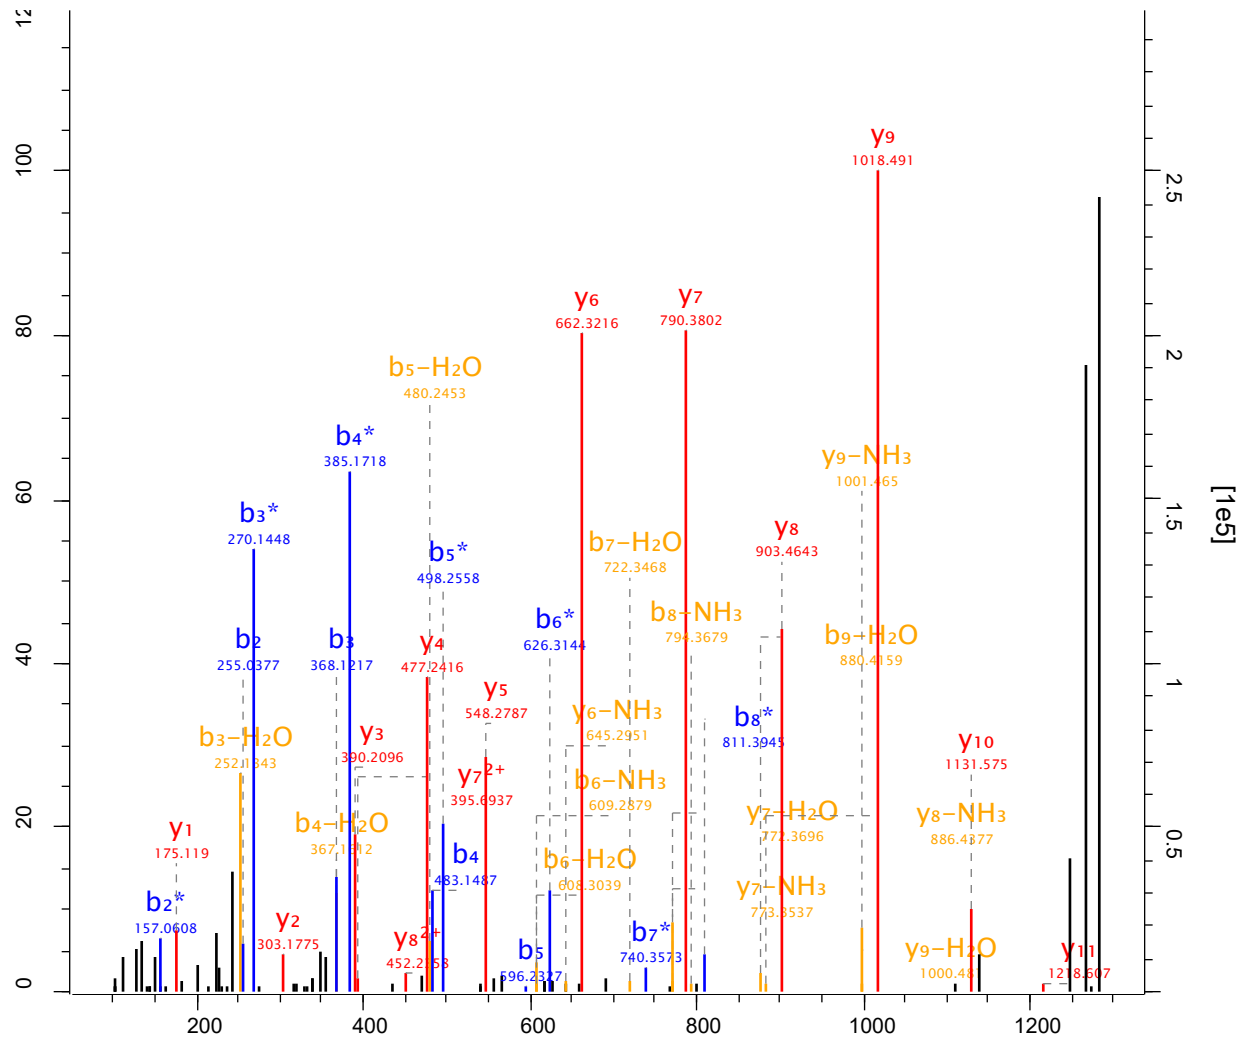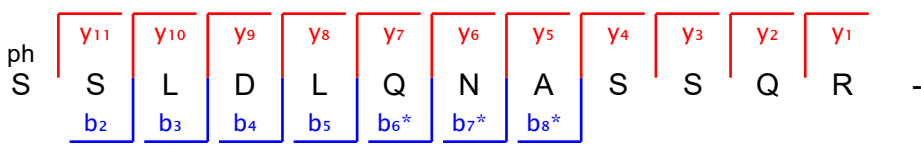

Raw file Scan Method Score m/z  
 sys\_05\_2 14184 FTMS; HCD 71.18 510.69

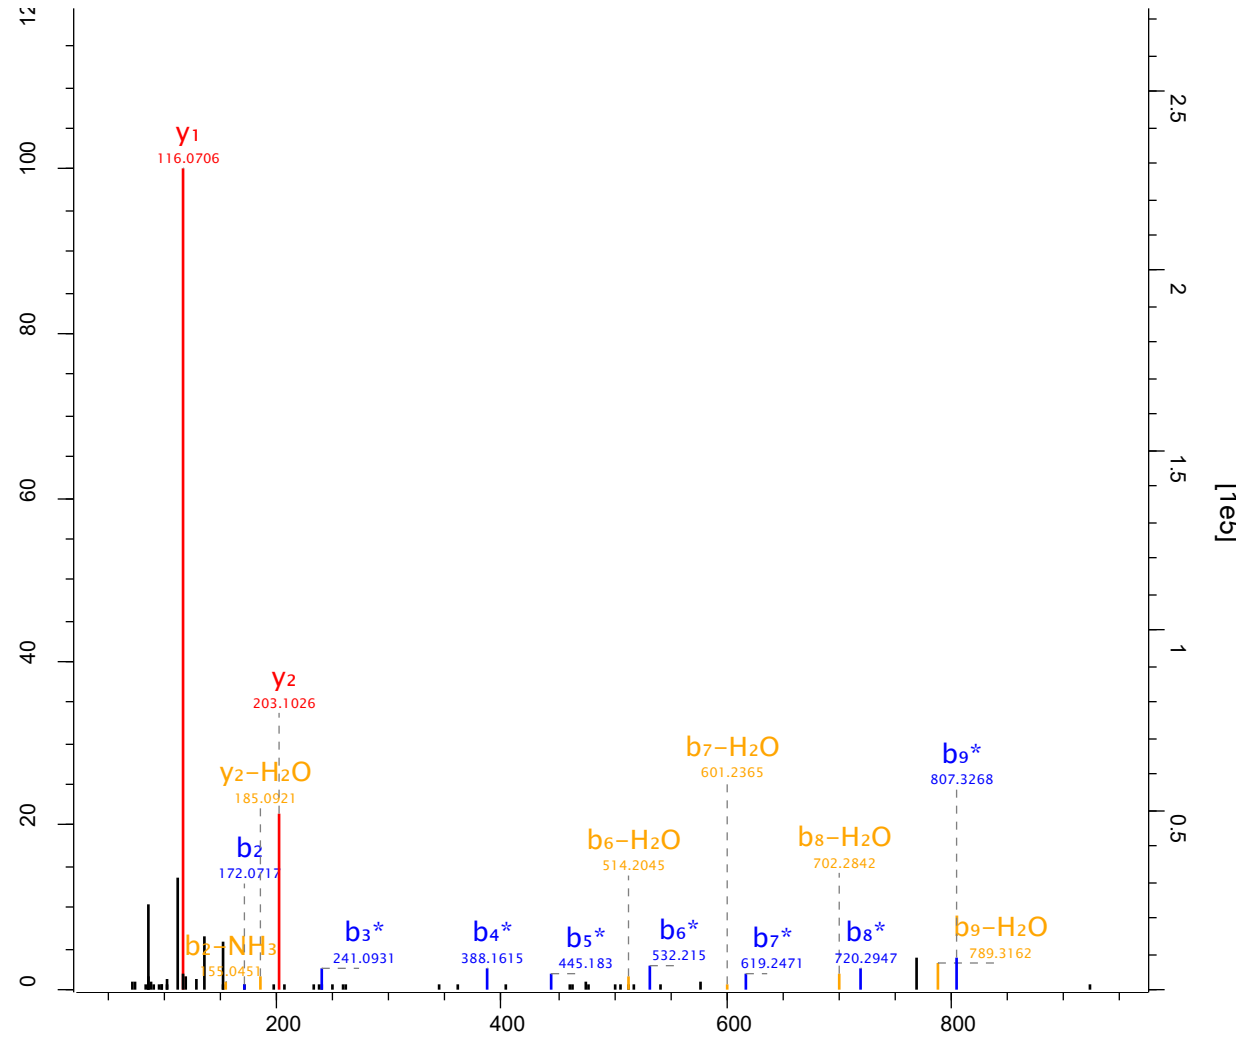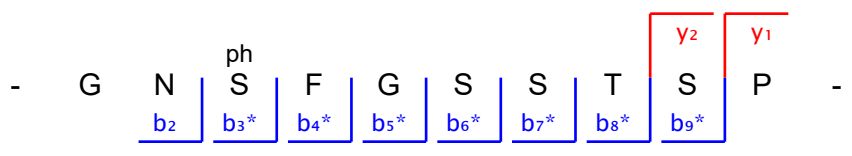

Raw file Scan Method Score m/z  
 sys\_05\_2 14217 FTMS; HCD 103.88 758.83

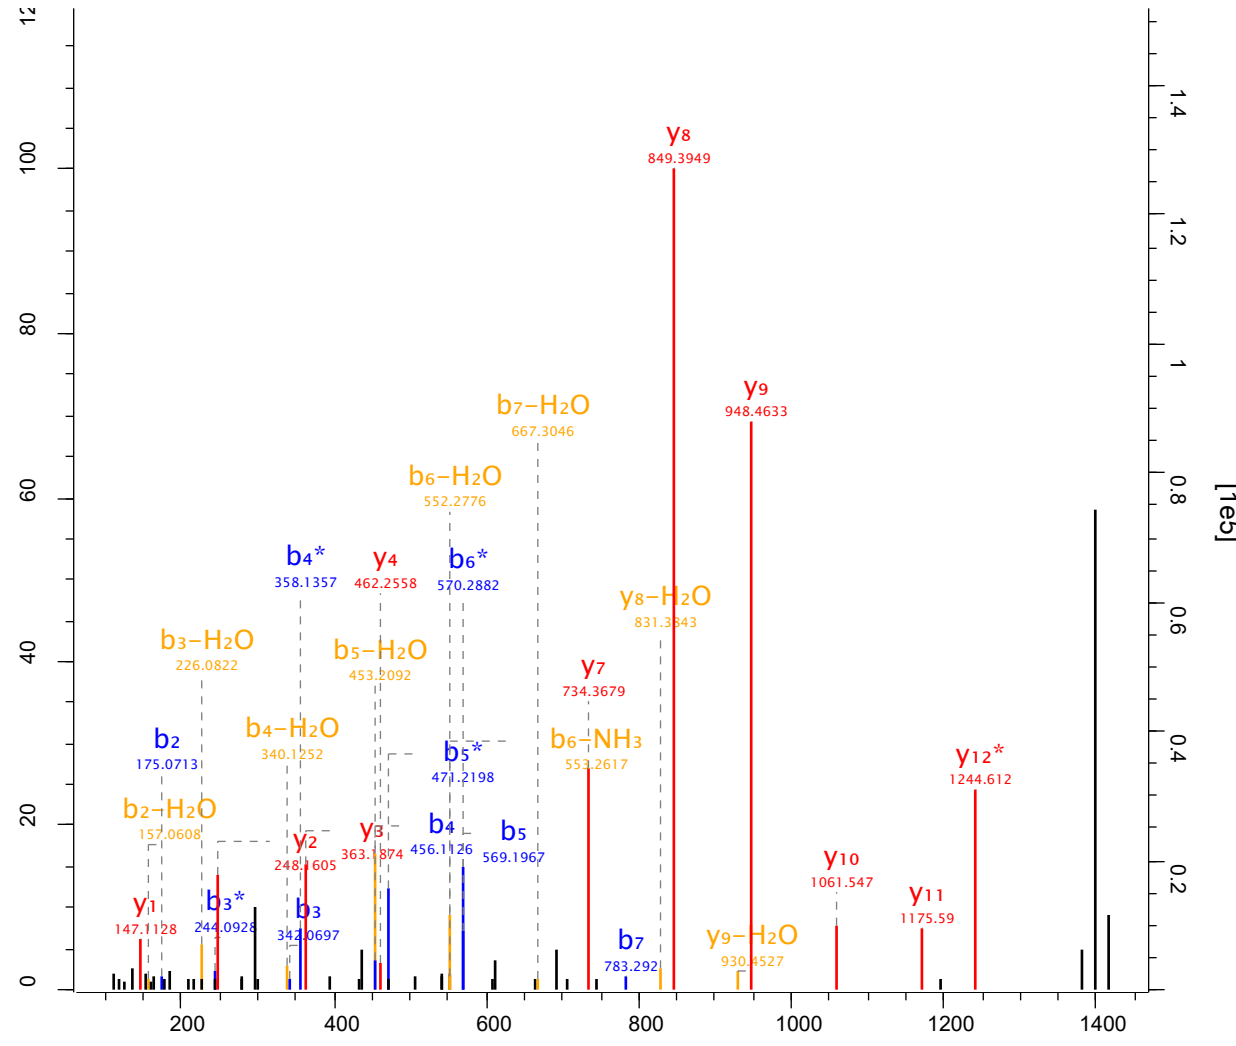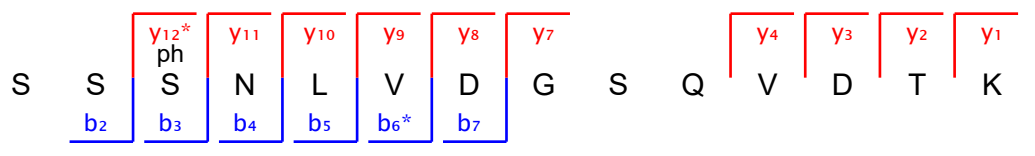

Raw file Scan Method Score m/z  
 sys\_05\_2 14279 FTMS; HCD 84.36 587.76

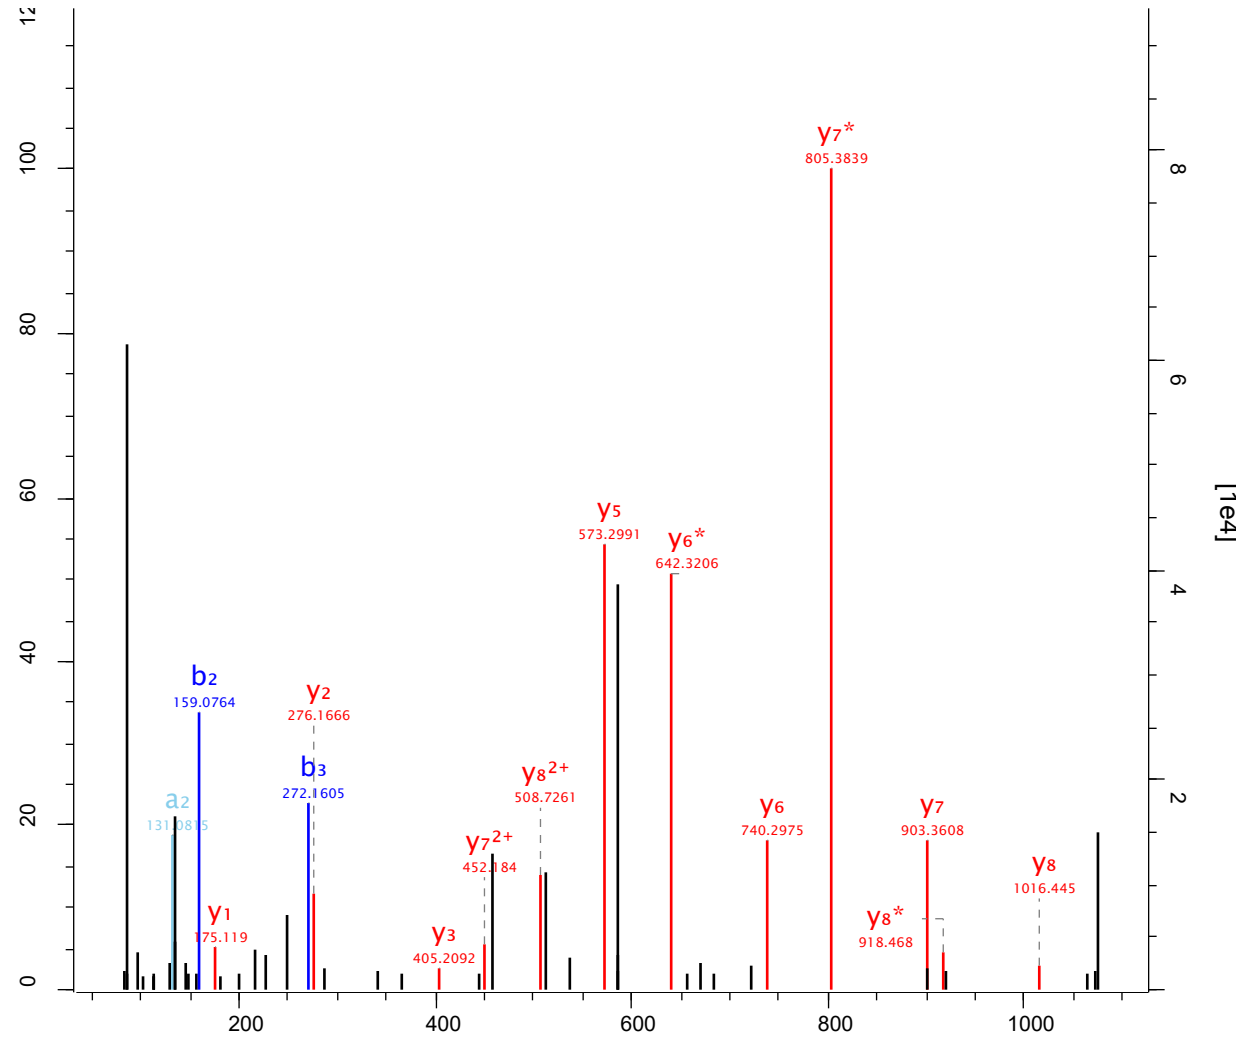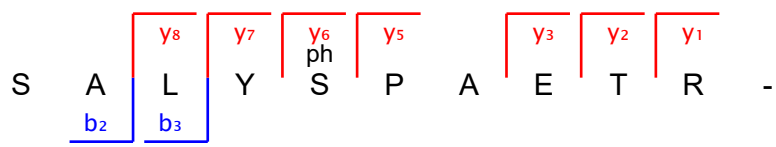



Raw file Scan Method Score m/z  
 sys\_05\_2 14316 FTMS; HCD 108.47 521.73

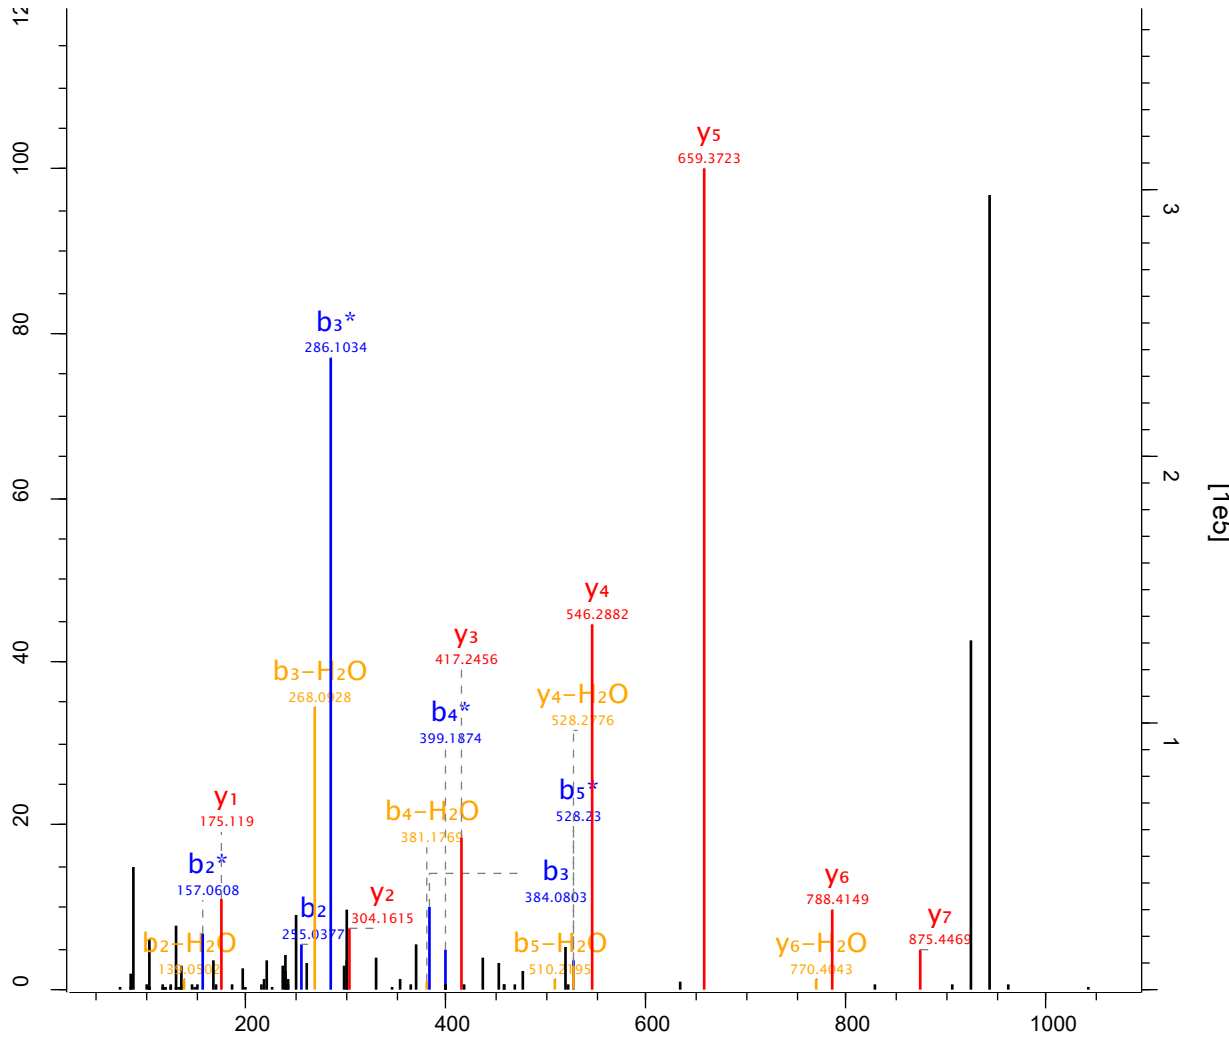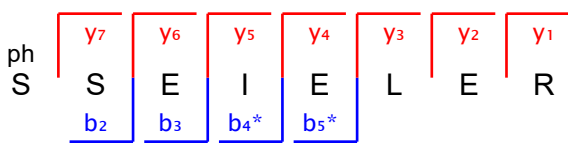

Raw file Scan Method Score m/z  
 sys\_05\_2 14367 FTMS; HCD 152.94 723.82

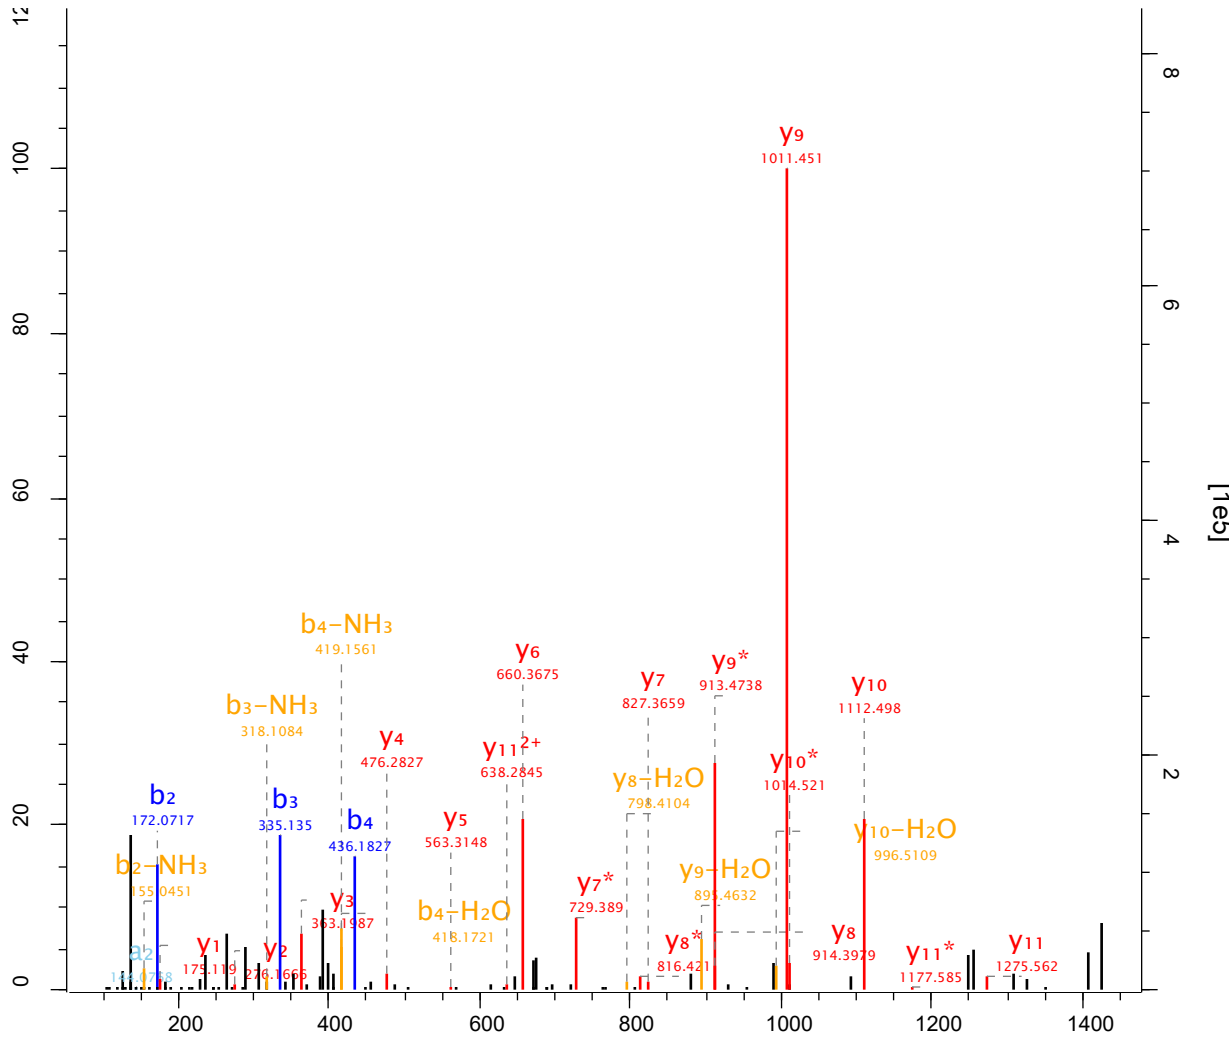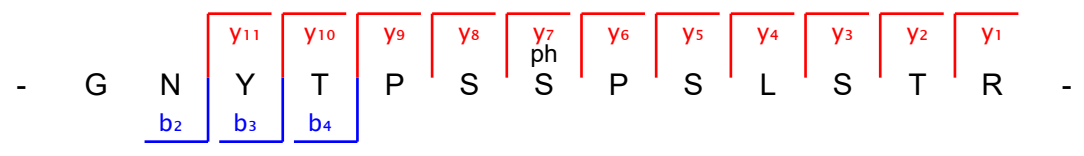

Raw file Scan Method Score m/z  
 sys\_05\_2 14385 FTMS; HCD 75.76 677.76

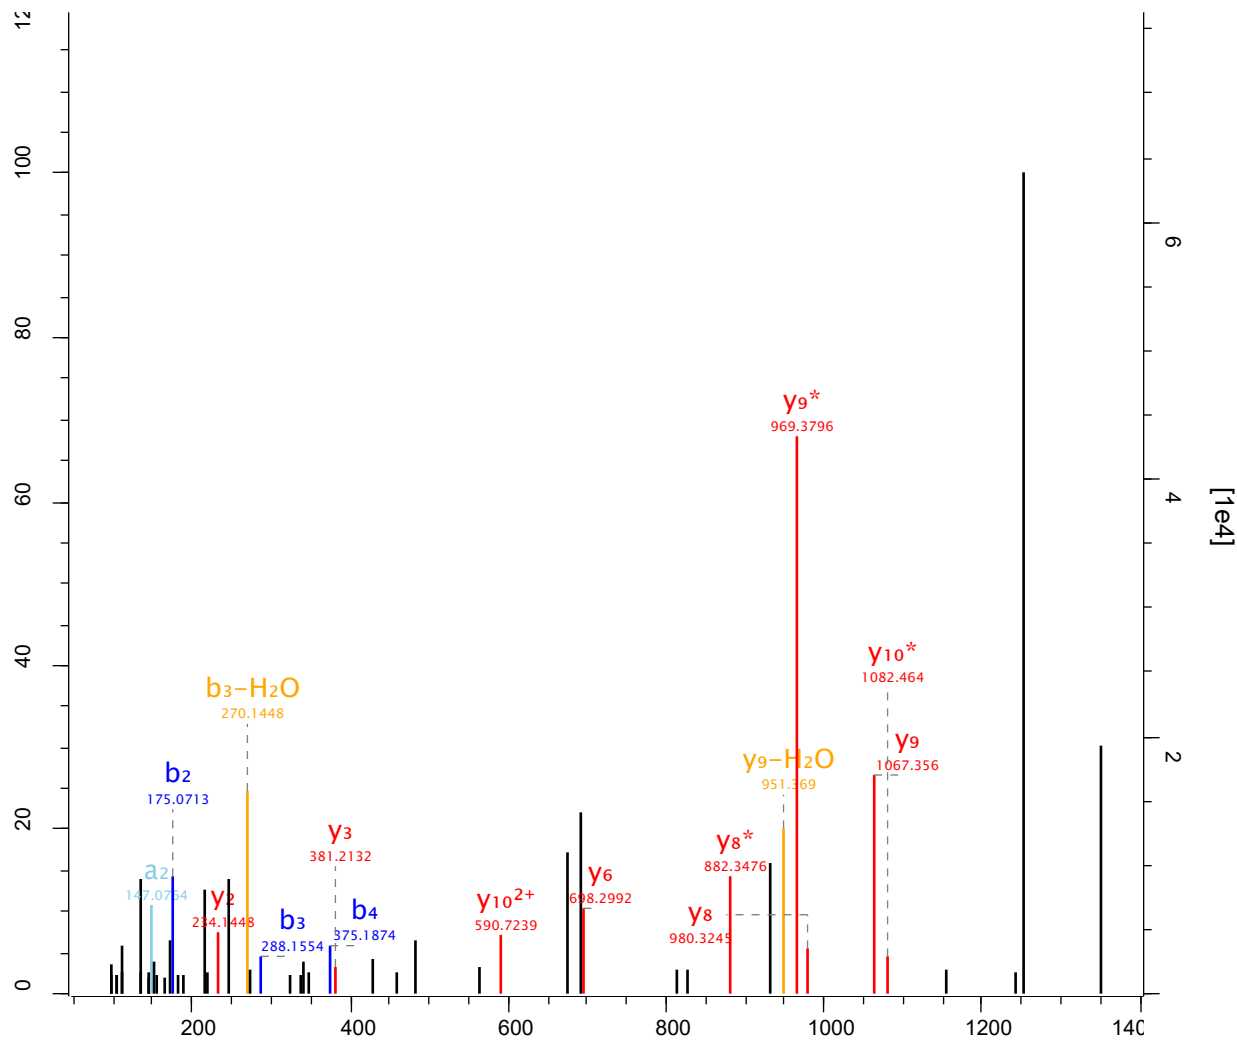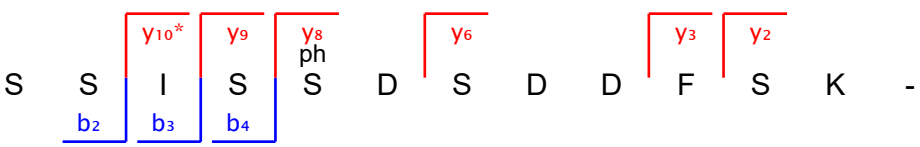

Raw file Scan Method Score m/z  
 sys\_05\_2 14408 FTMS; HCD 51.77 631.76

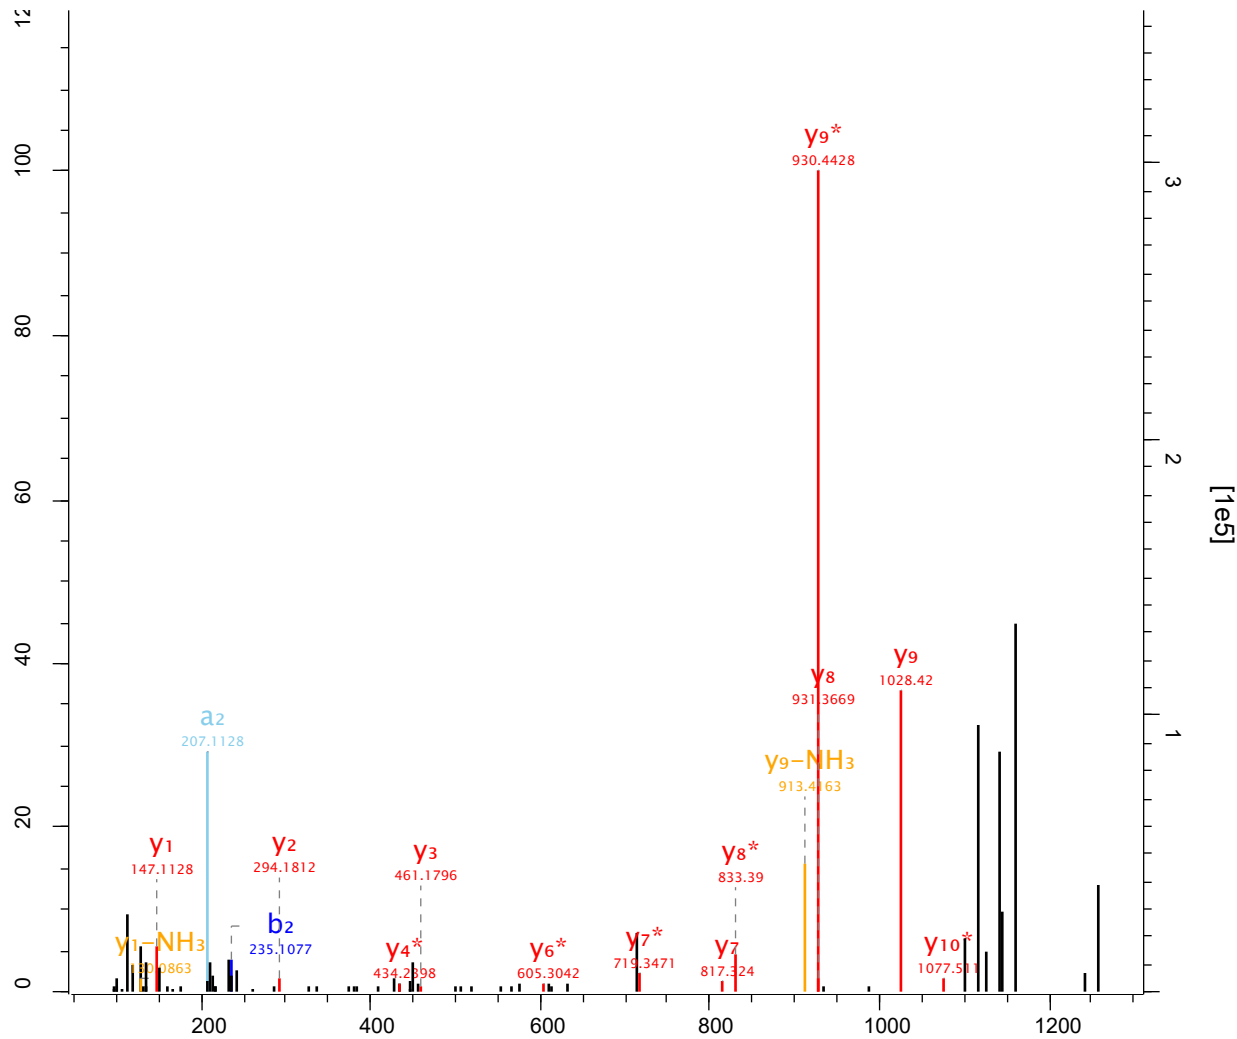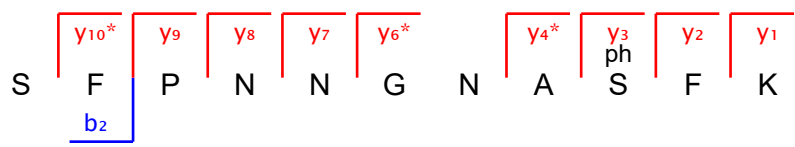

Raw file Scan Method Score m/z  
 sys\_05\_2 14420 FTMS; HCD 197.41 711.81

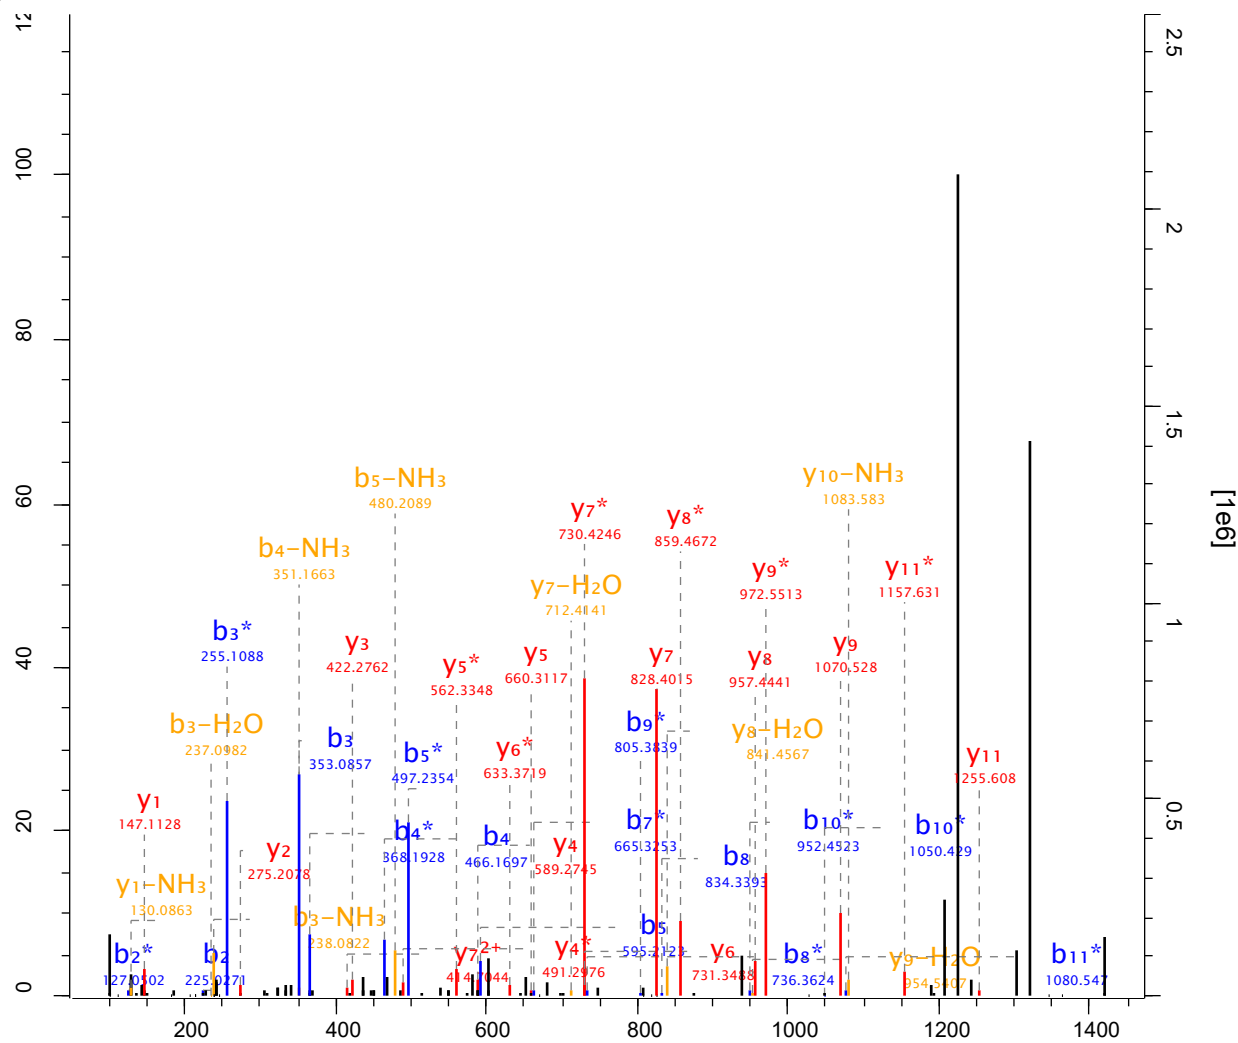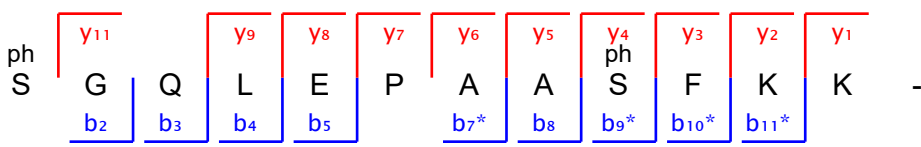

Raw file Scan Method Score m/z  
 sys\_05\_2 14445 FTMS; HCD 84.76 595.78

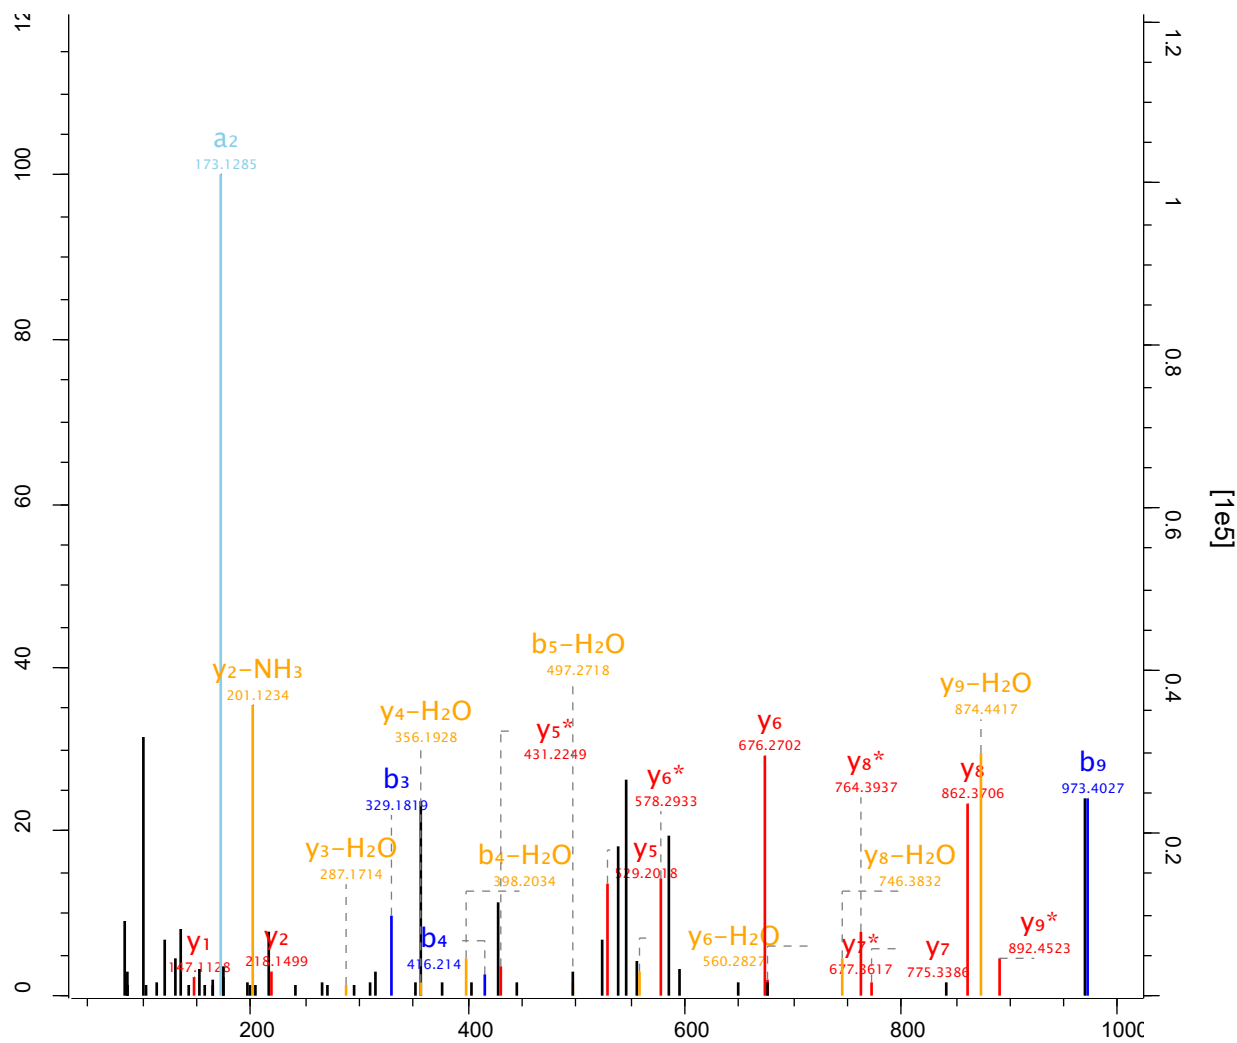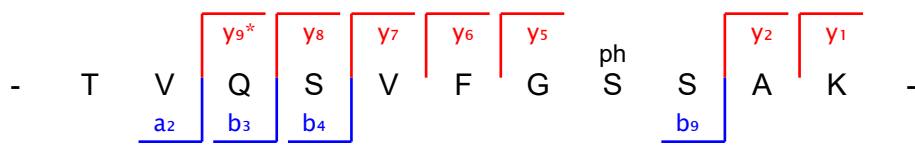

Raw file Scan Method Score m/z  
 sys\_05\_2 14485 FTMS; HCD 97.69 601.26

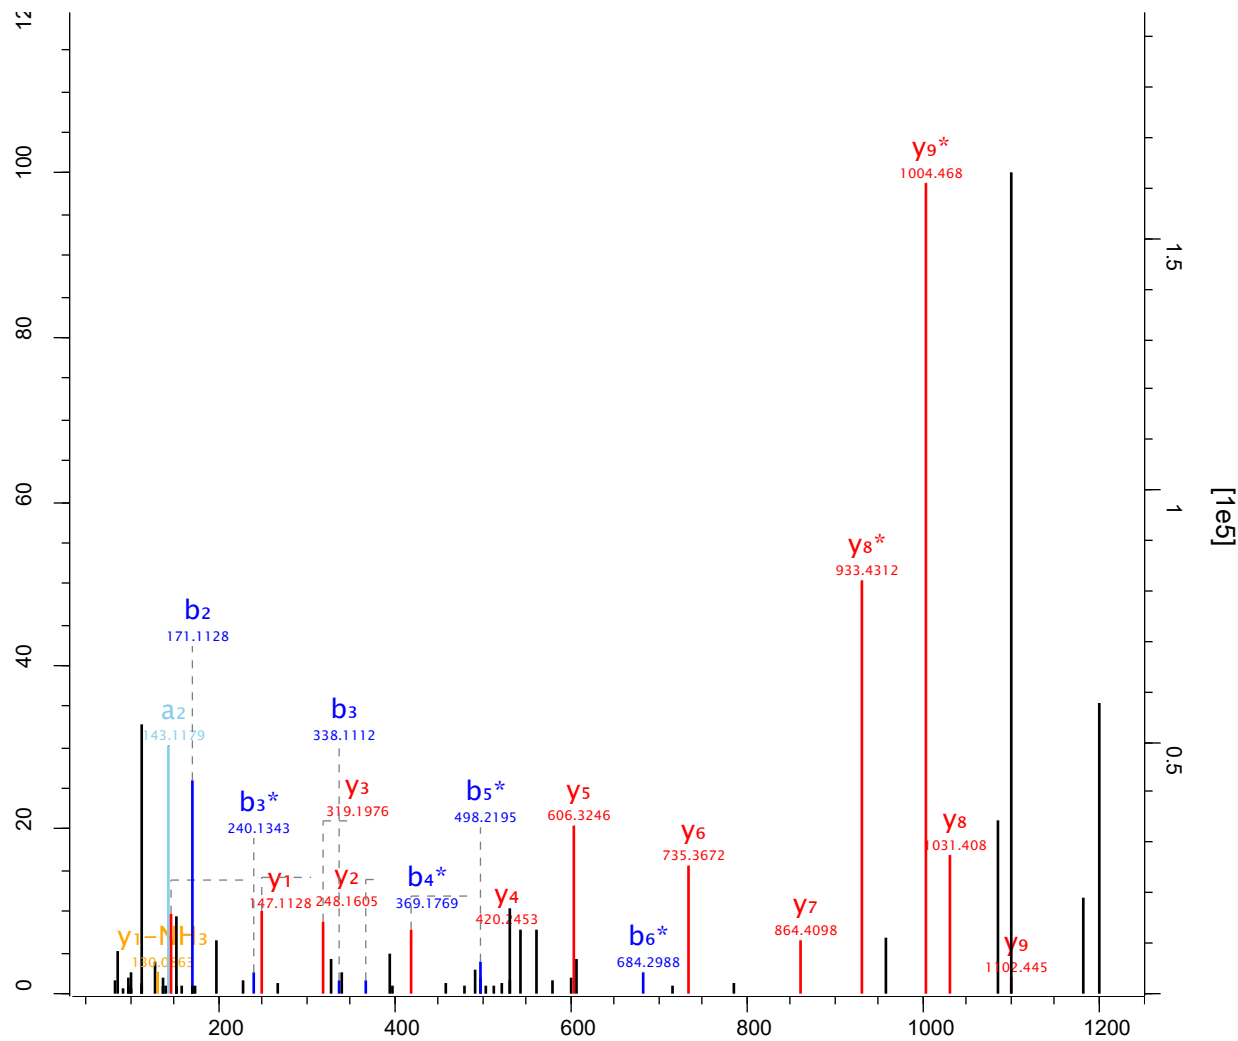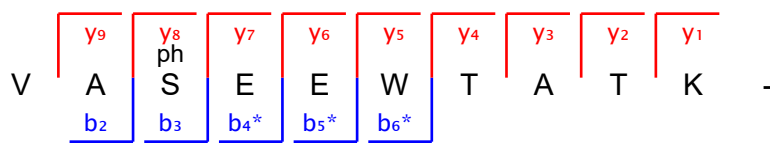

Raw file Scan Method Score m/z  
 sys\_05\_2 14530 FTMS; HCD 77.19 475.9

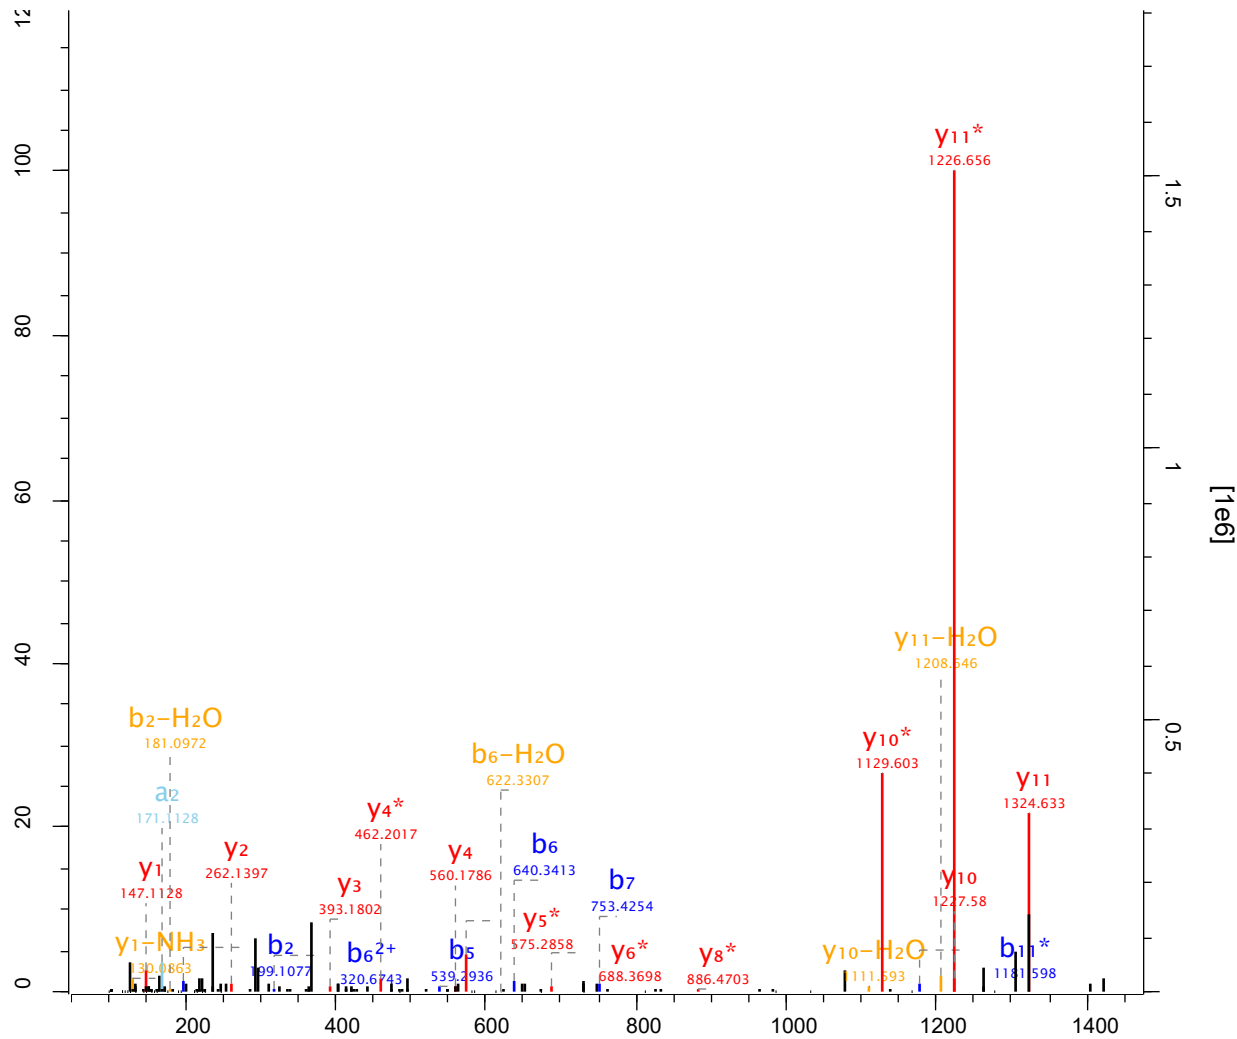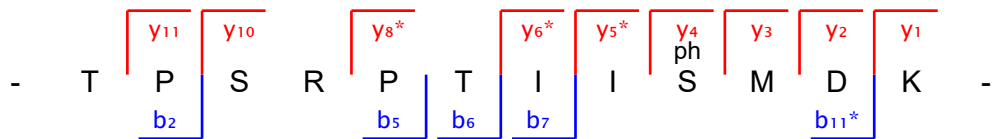



Raw file Scan Method Score m/z  
 sys\_05\_2 14534 FTMS; HCD 192.46 625.74

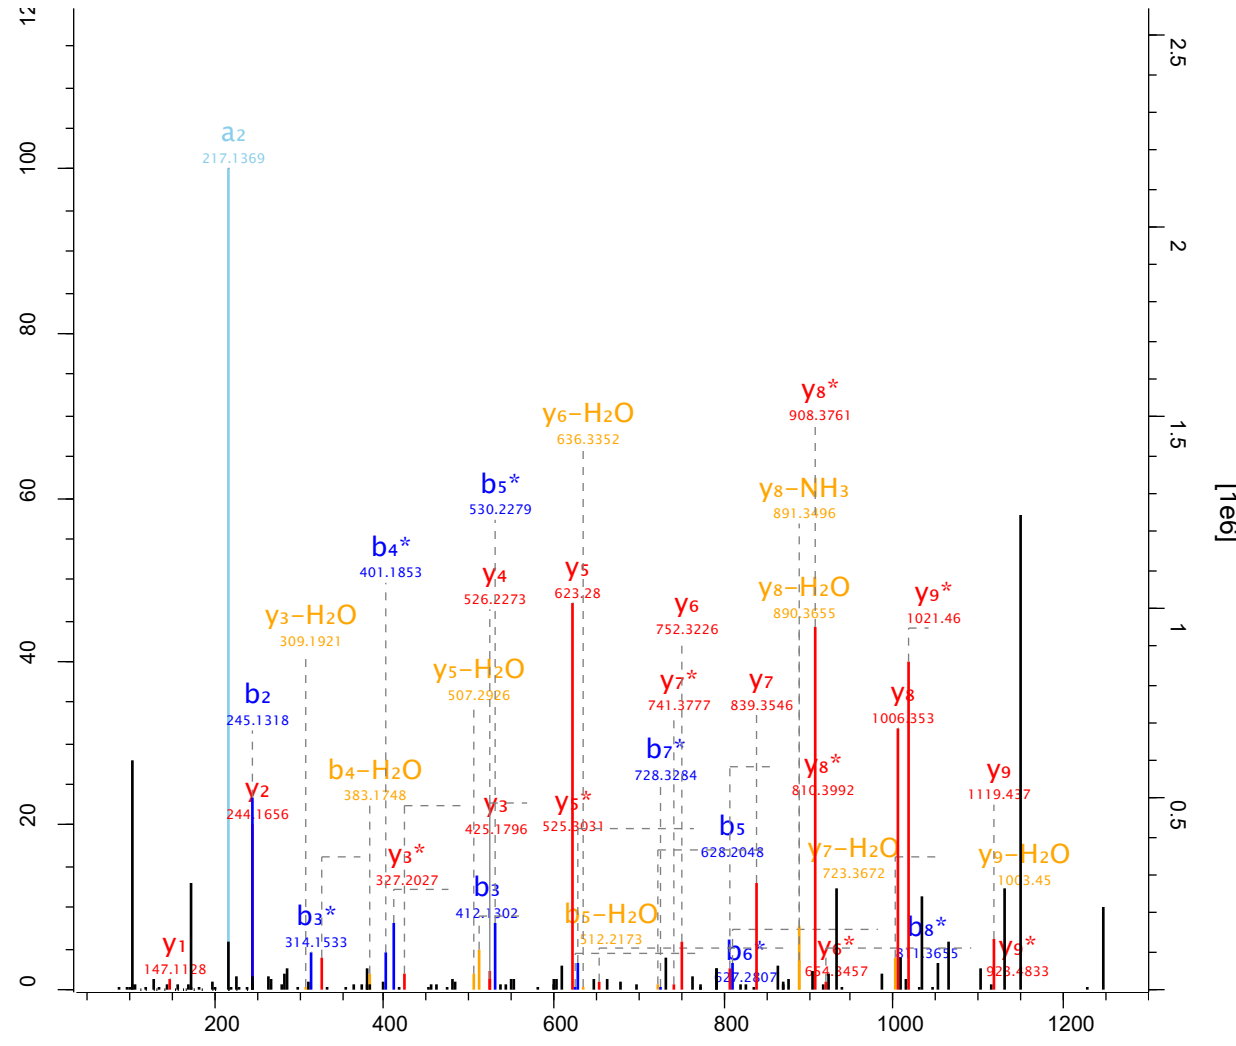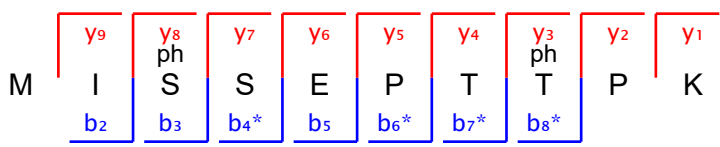

Raw file Scan Method Score m/z  
 sys\_05\_2 14655 FTMS; HCD 49.99 517.9

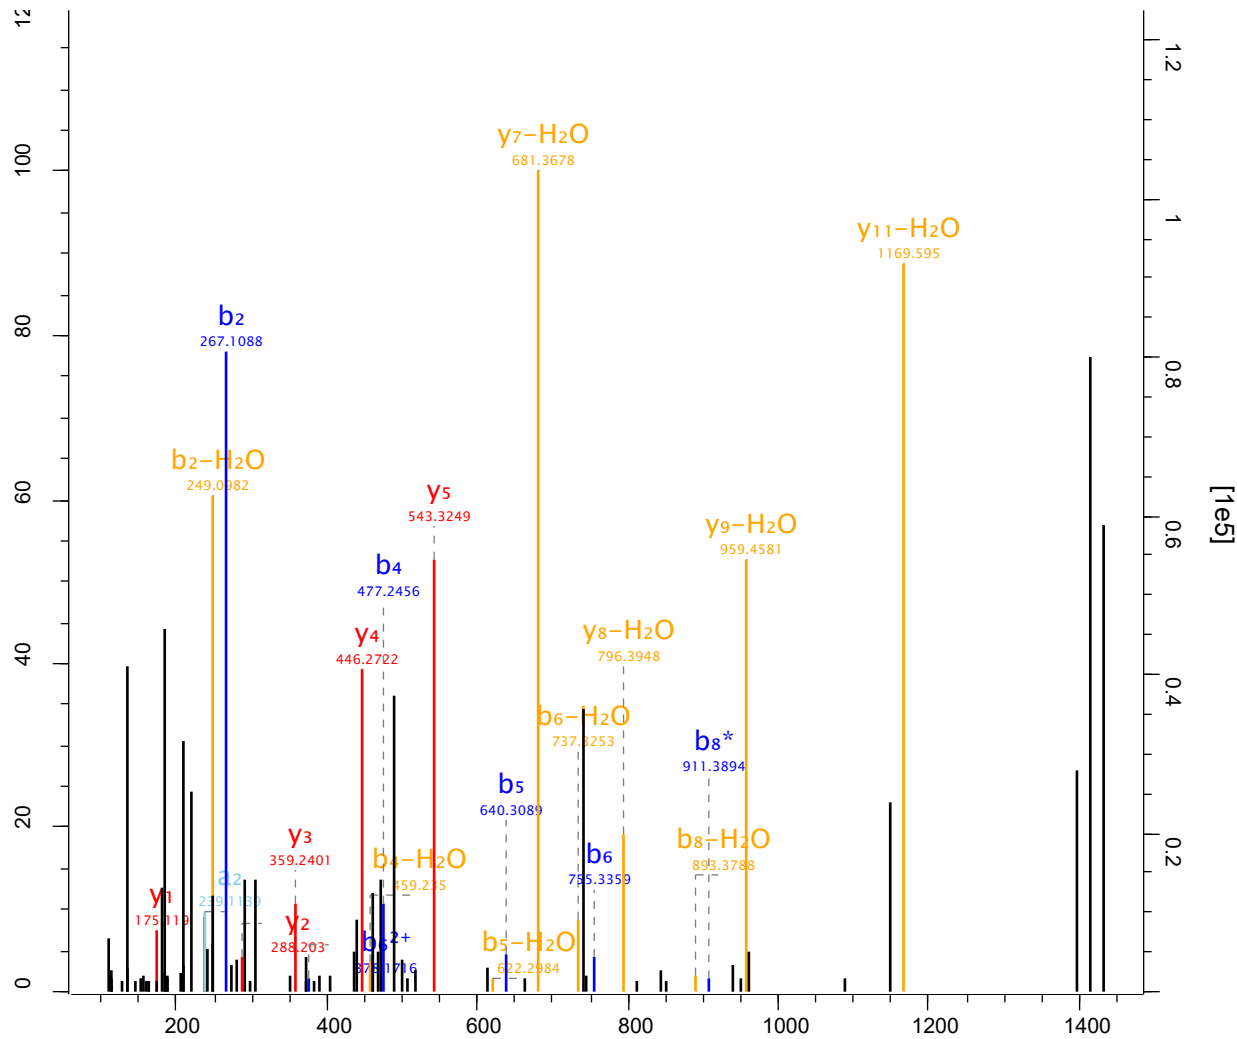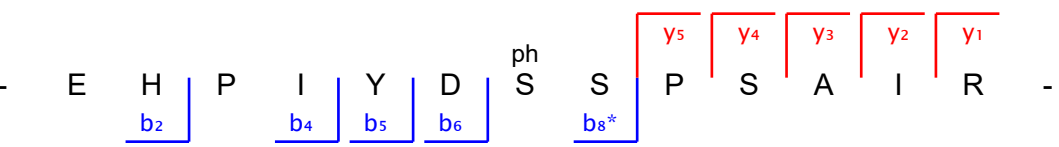

Raw file Scan Method Score m/z  
 sys\_05\_2 14733 FTMS; HCD 46.7 685.29

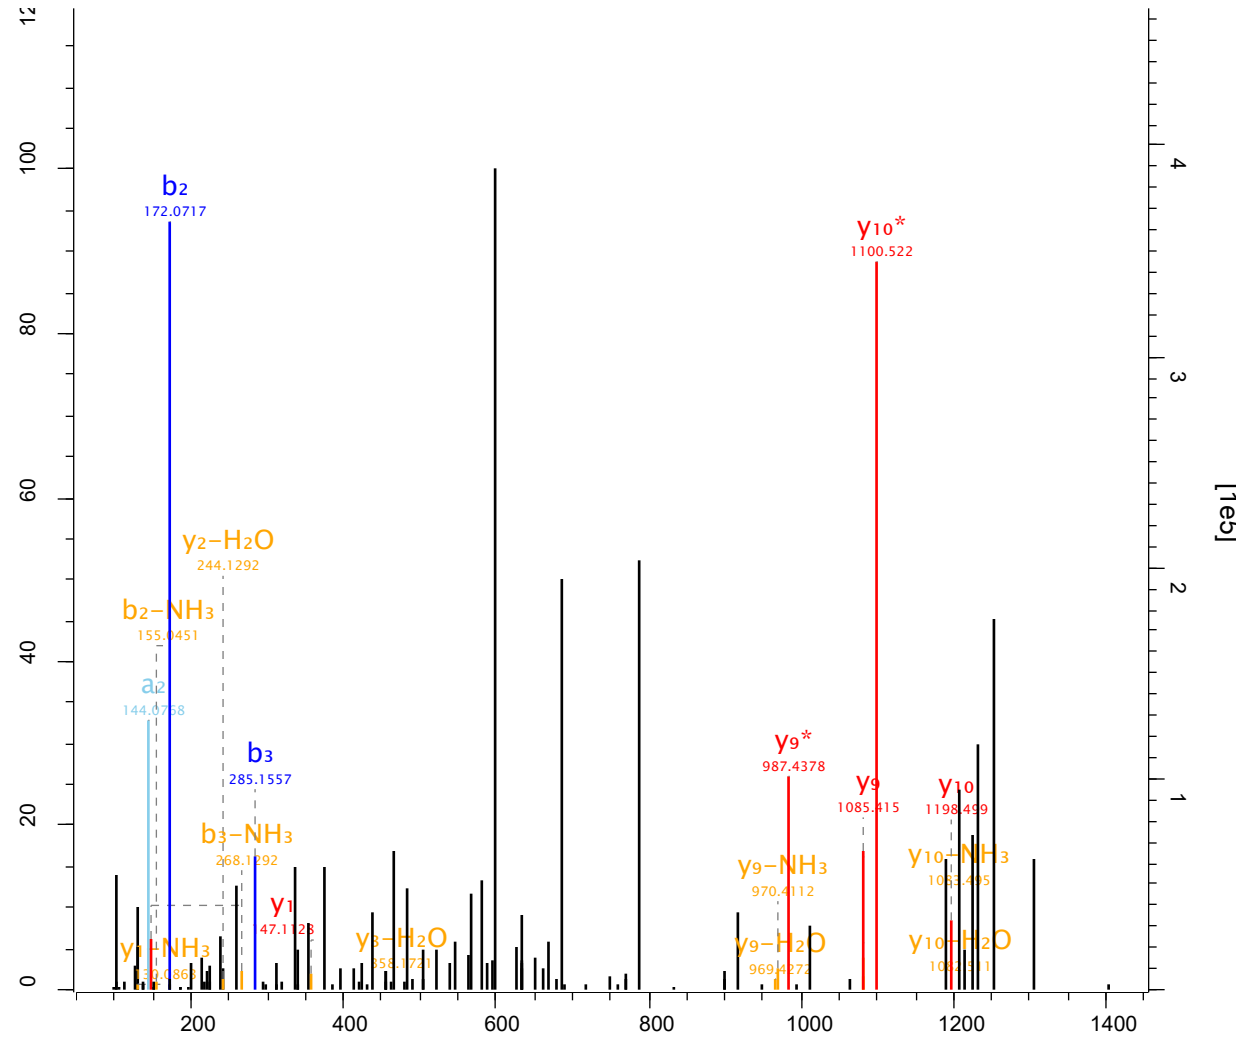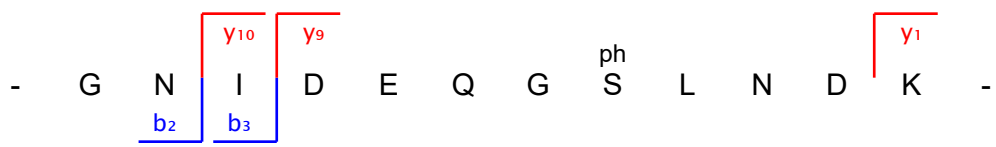

Raw file sys\_05\_2 Scan 14803 Method FTMS; HCD Score 119.17 m/z 682.29

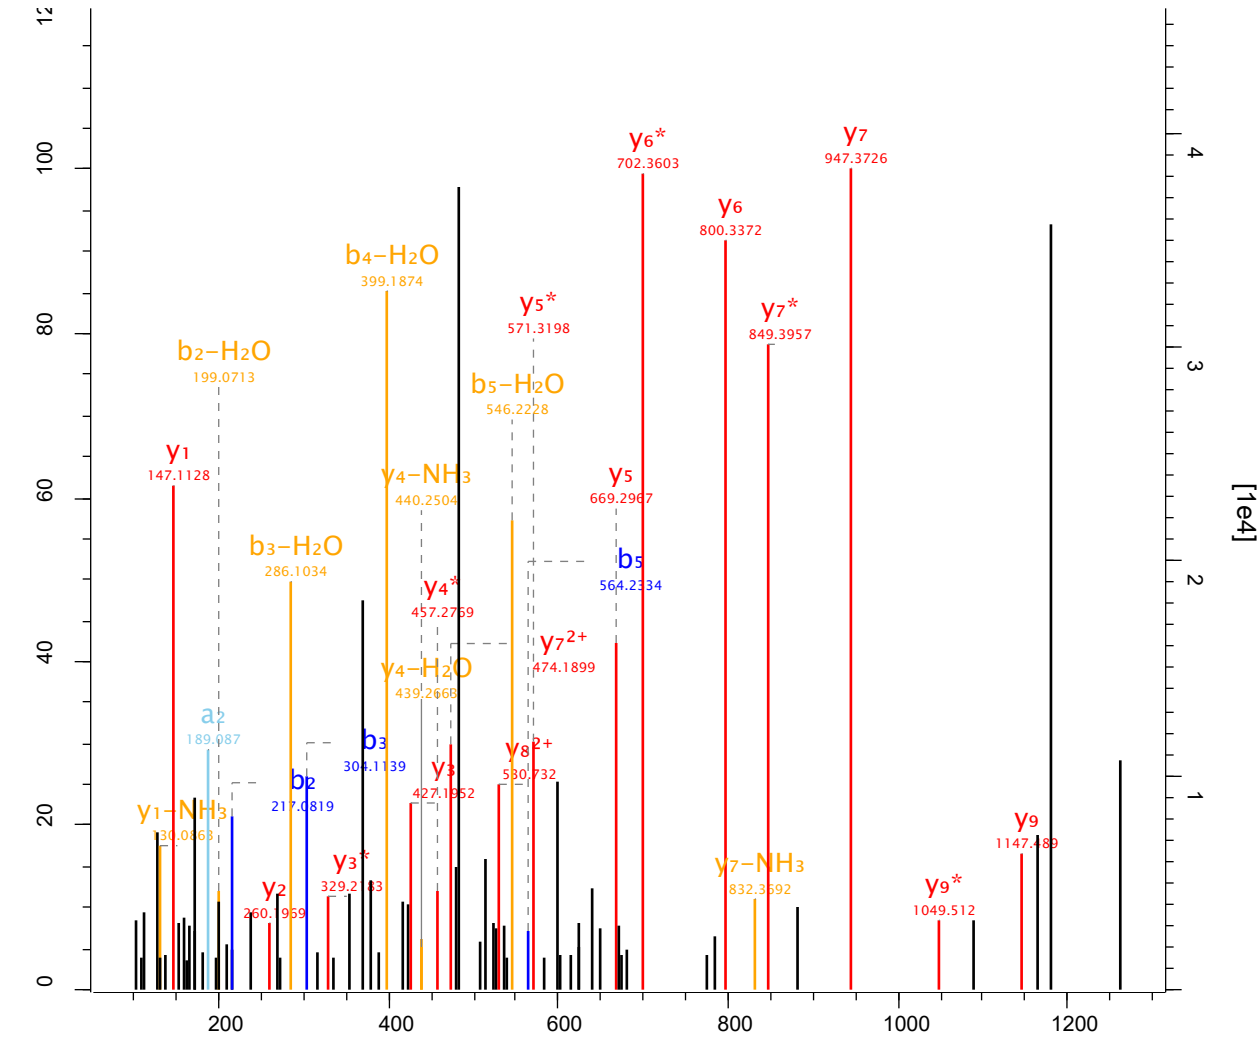

- E S S L M M N Q S I K -

b<sub>2</sub>
b<sub>3</sub>
b<sub>5</sub>

Raw file Scan Method Score m/z  
 sys\_05\_2 14832 FTMS; HCD 61.96 731.83

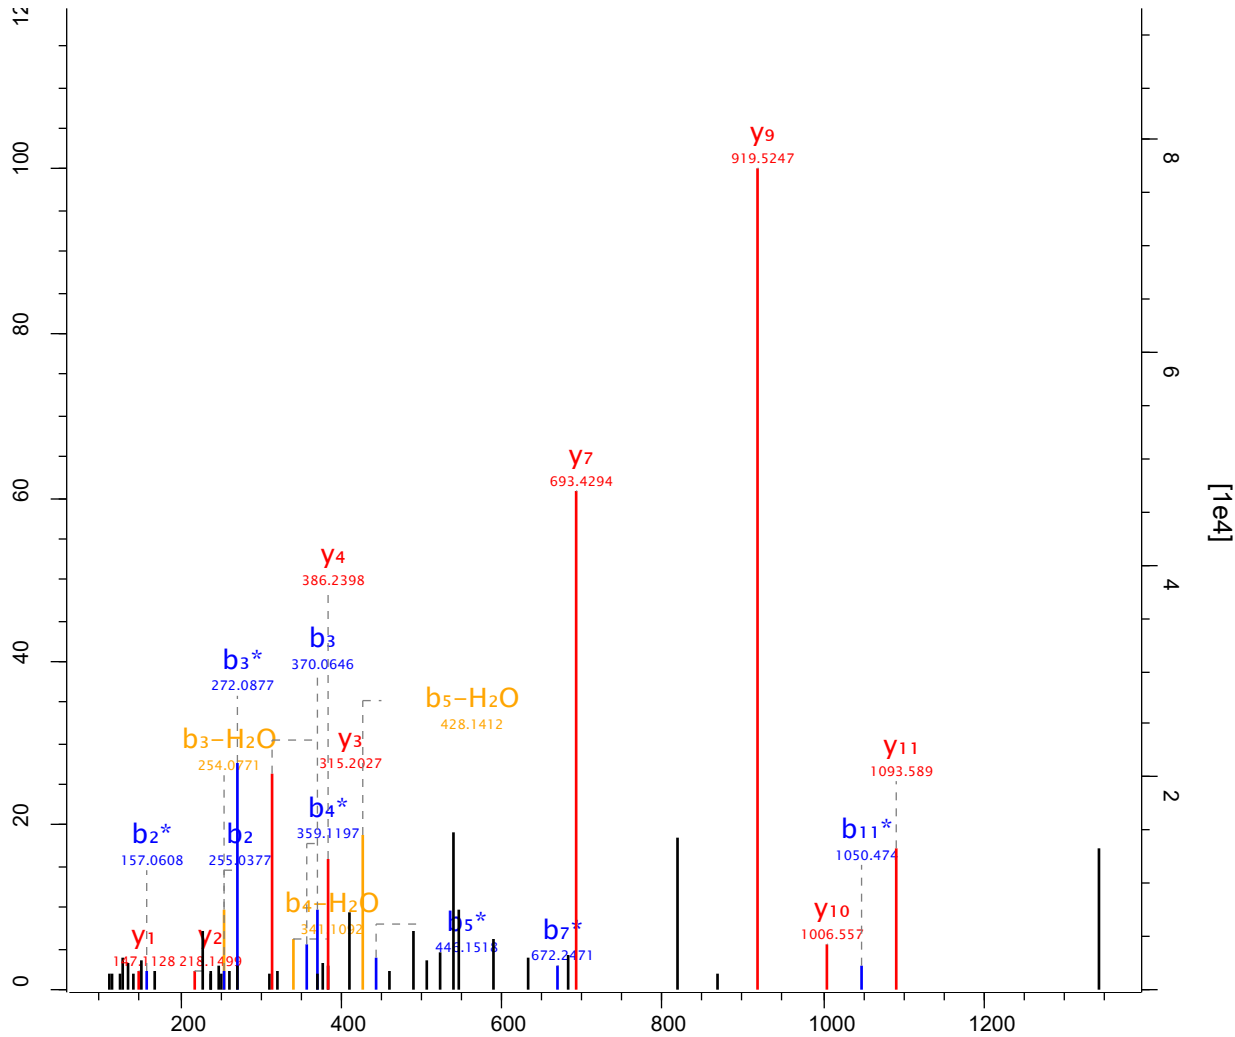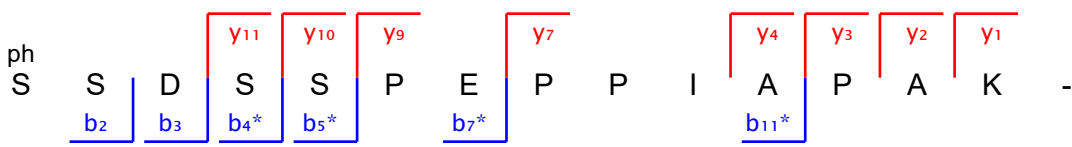

Raw file Scan Method Score m/z  
 sys\_05\_2 14857 FTMS; HCD 57.2 555.78

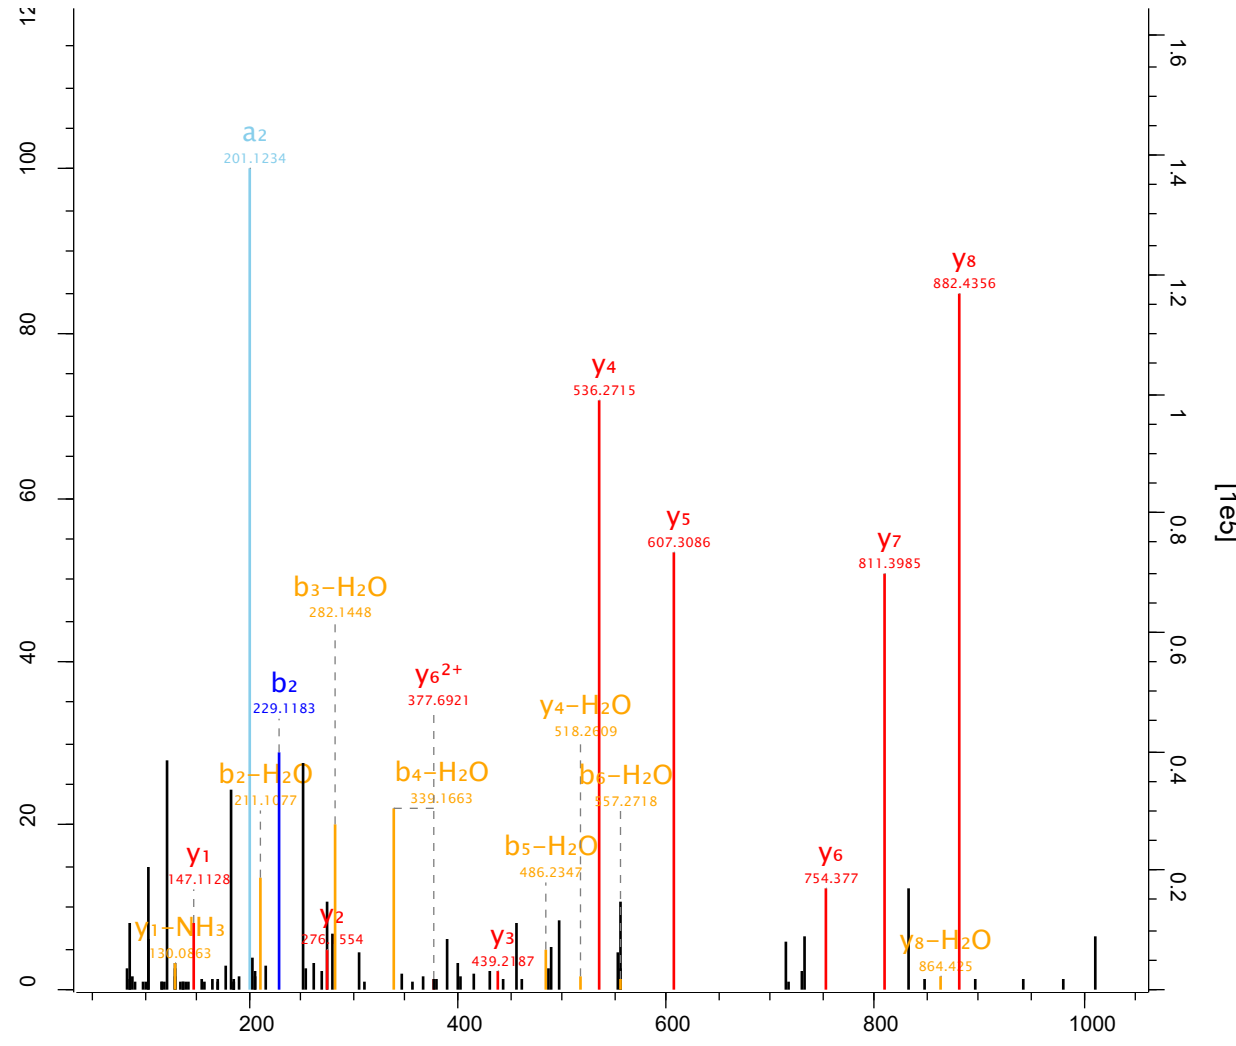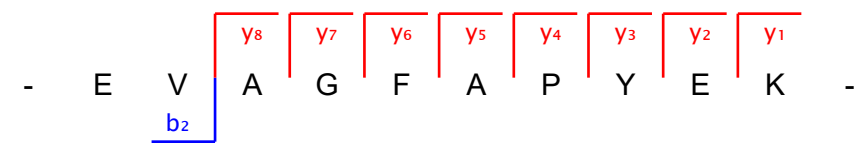

Raw file Scan Method Score m/z  
 sys\_05\_2 14934 FTMS; HCD 108.71 606.93

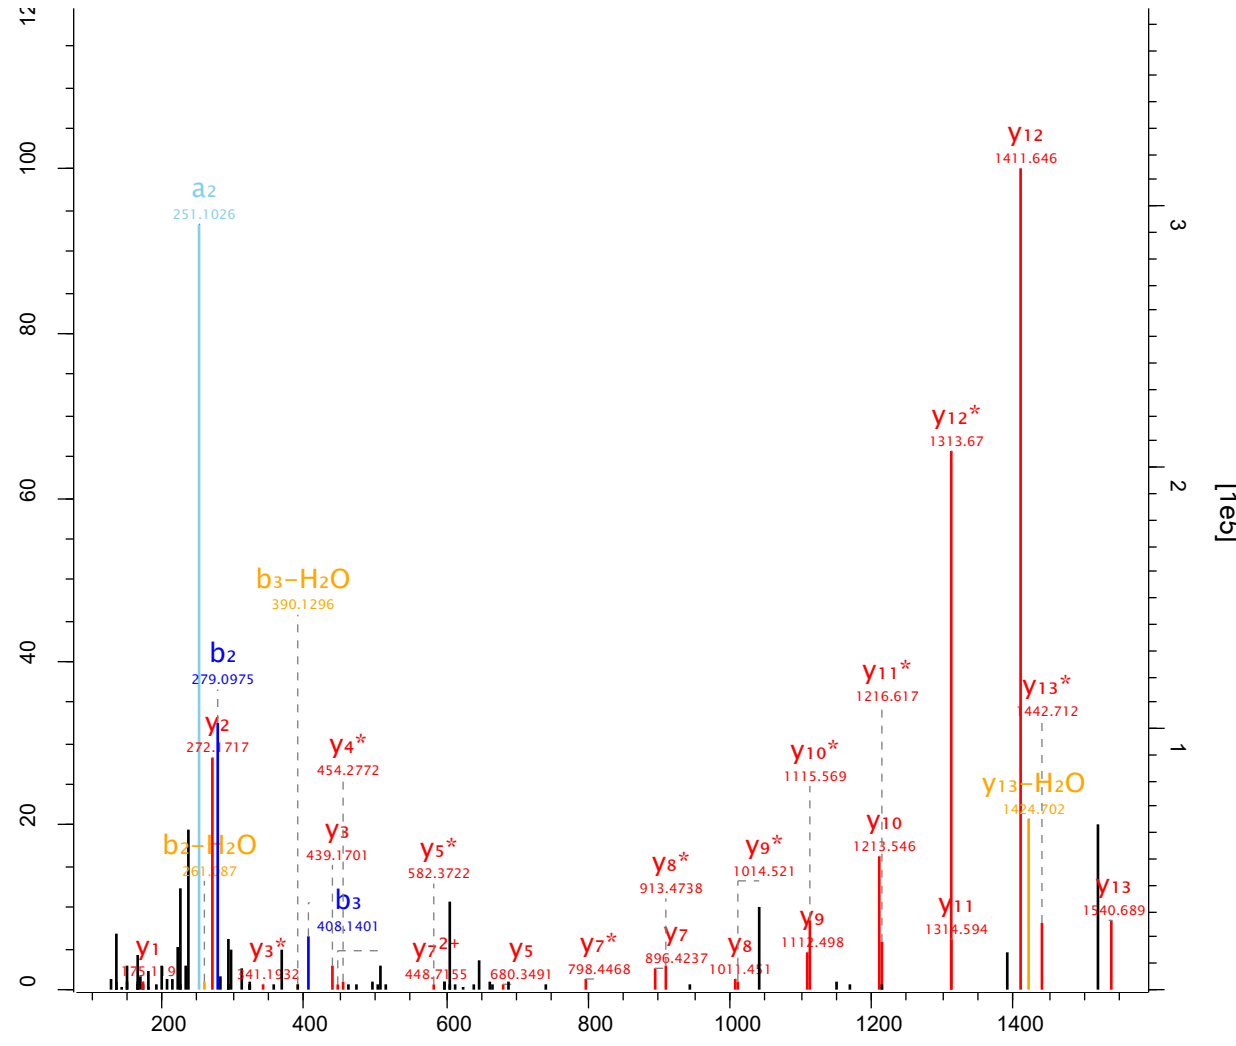

- D Y E P T T T D S E K L S P R

b<sub>2</sub>
b<sub>3</sub>
y<sub>13</sub>
y<sub>12</sub>
y<sub>11</sub>
y<sub>10</sub>
y<sub>9</sub>
y<sub>8</sub>
y<sub>7</sub>
y<sub>5</sub>
y<sub>4</sub>\*
y<sub>3</sub>ph
y<sub>2</sub>
y<sub>1</sub>

| Raw file | Scan | Method    | Score | m/z    |
|----------|------|-----------|-------|--------|
| sys_05_2 | 1503 | FTMS; HCD | 66.19 | 566.74 |

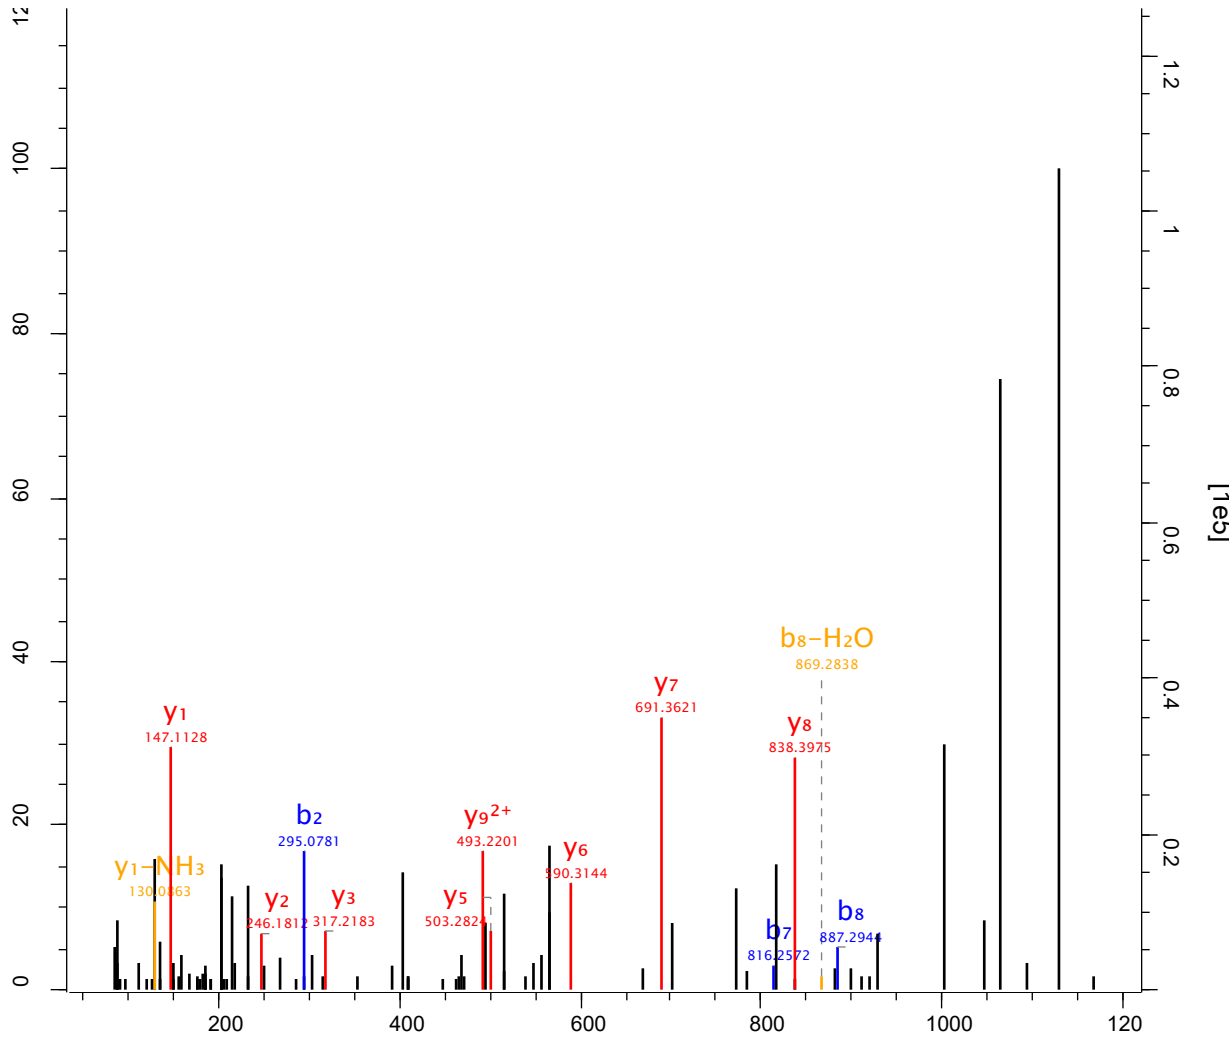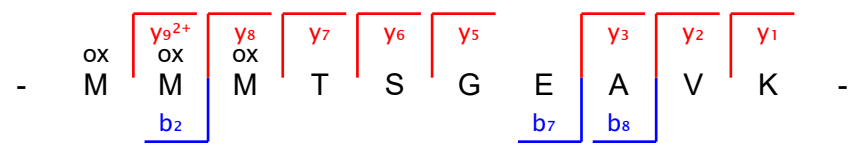



Raw file Scan Method Score m/z  
 sys\_05\_2 15198 FTMS; HCD 120.32 840.88

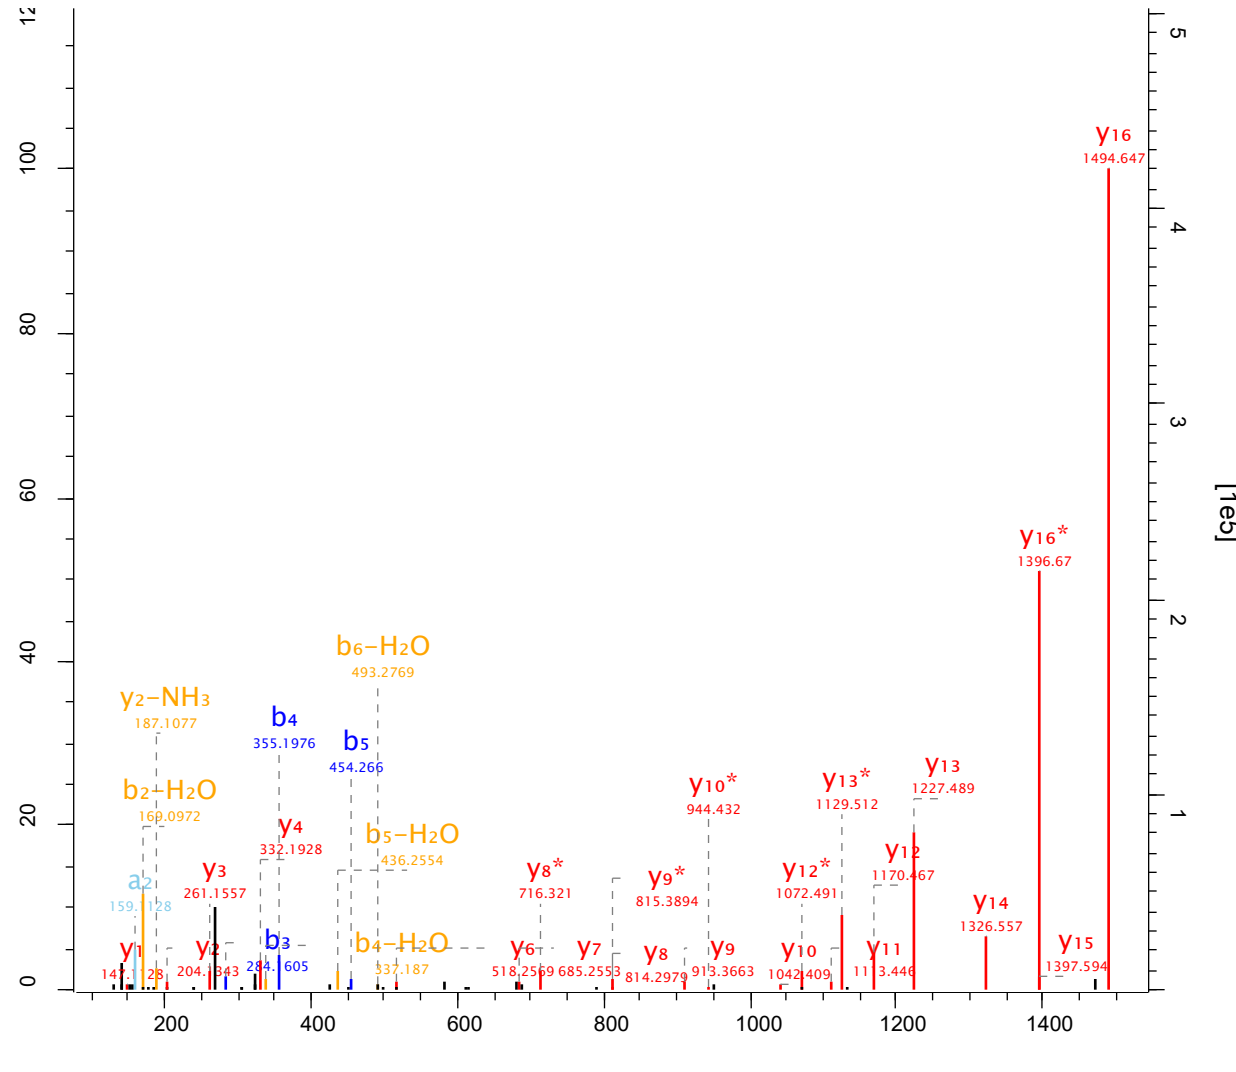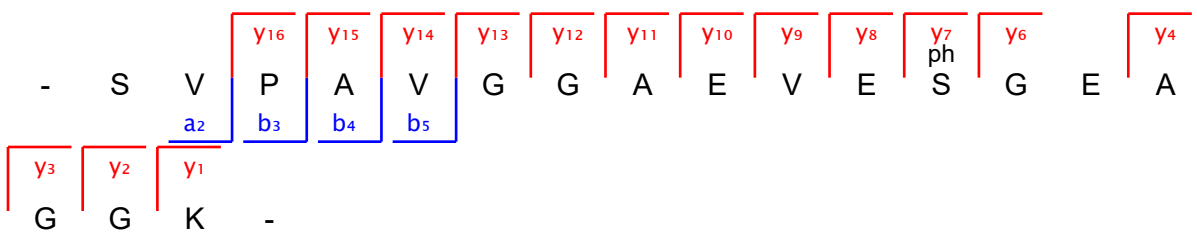

Raw file Scan Method Score m/z  
 sys\_05\_2 15234 FTMS; HCD 54.26 540.73

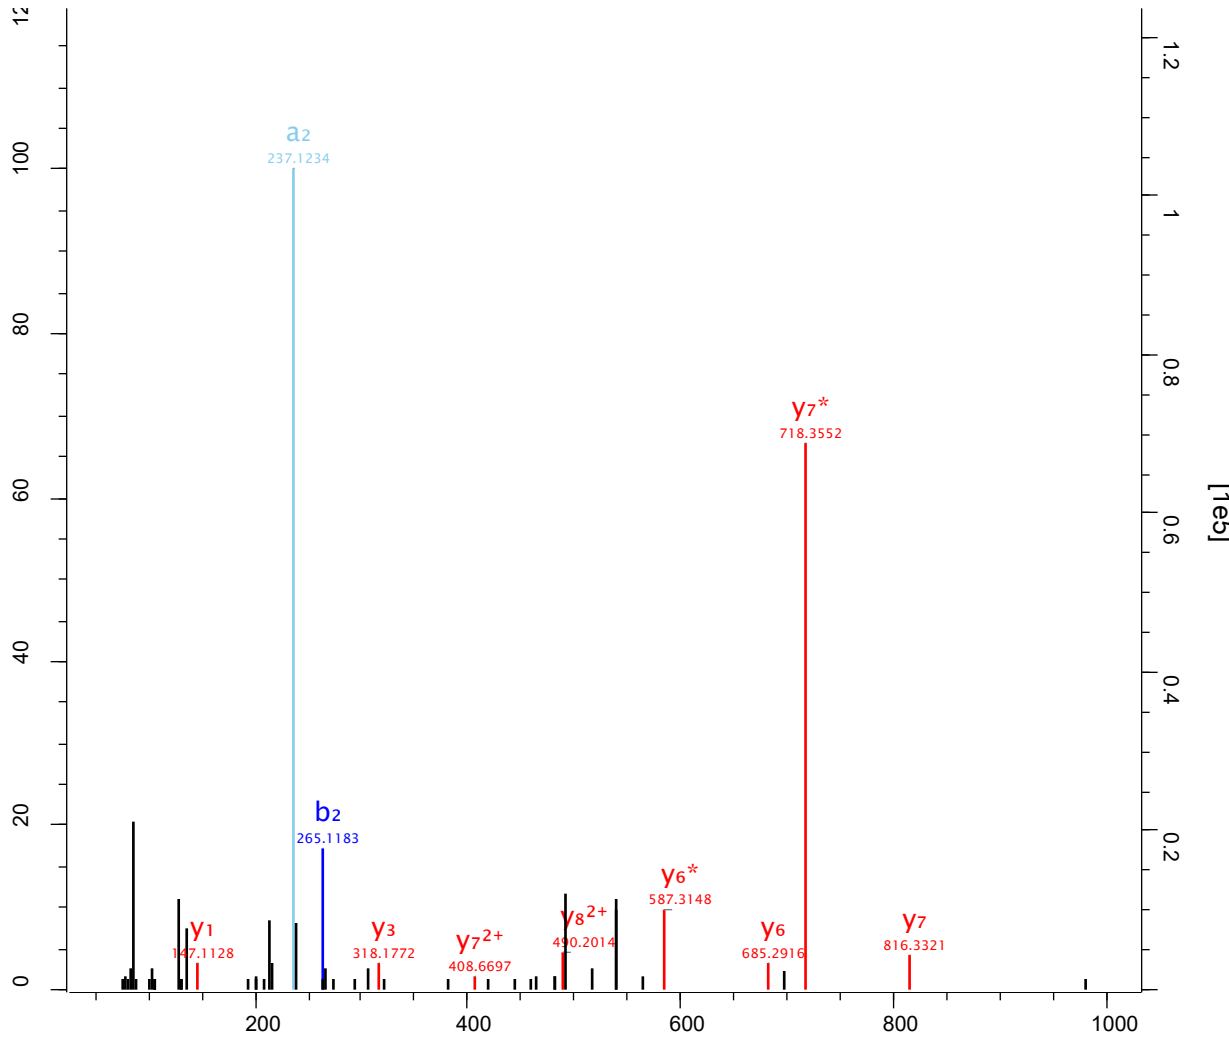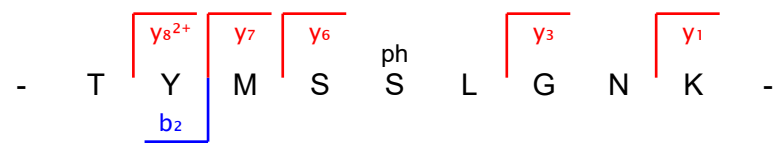

Raw file Scan Method Score m/z  
 sys\_05\_2 15306 FTMS; HCD 139.11 880.84

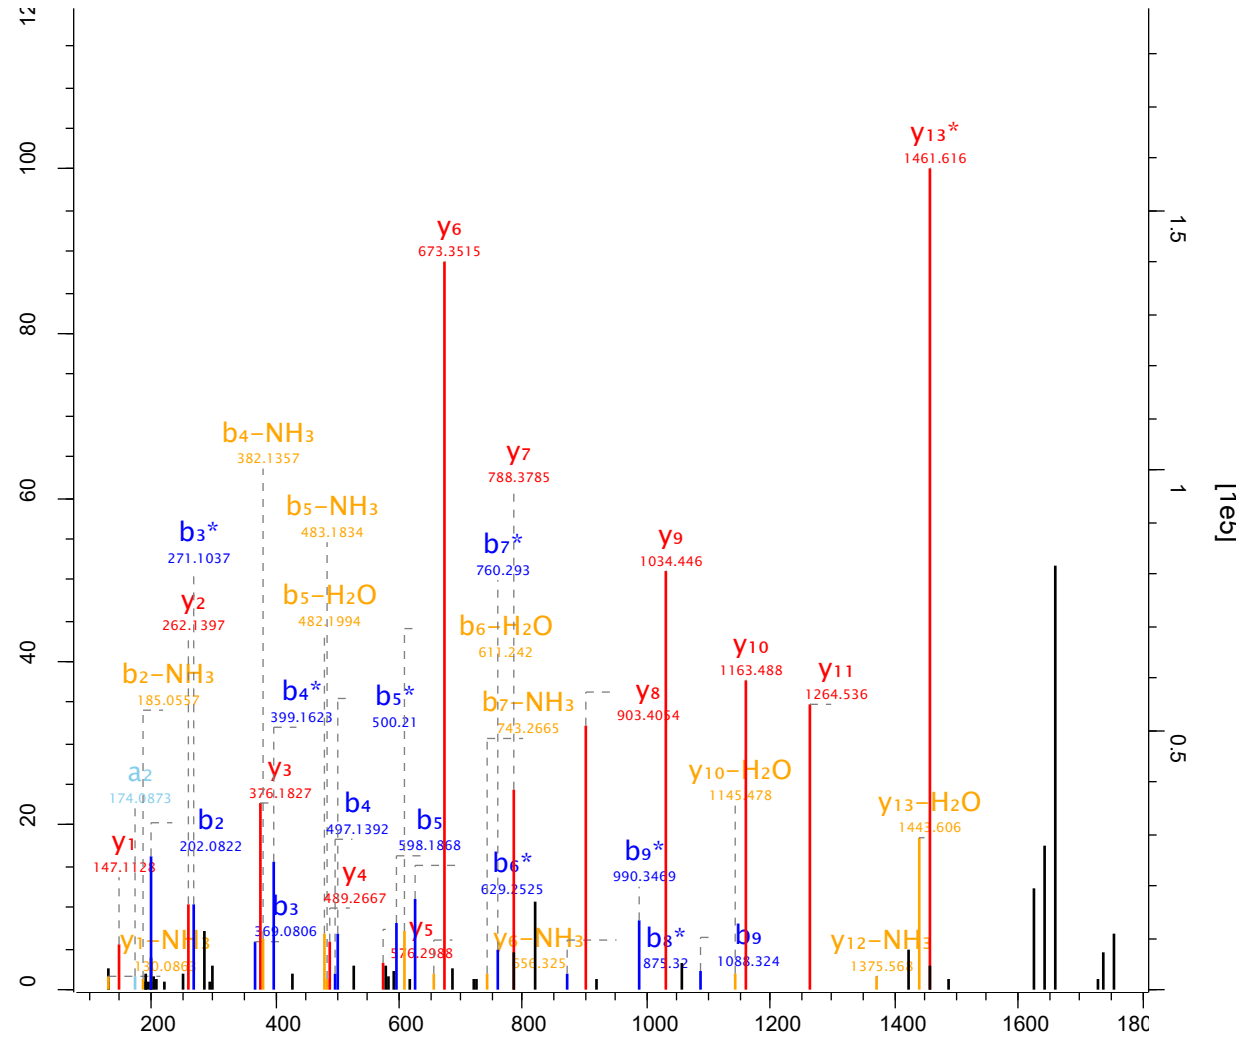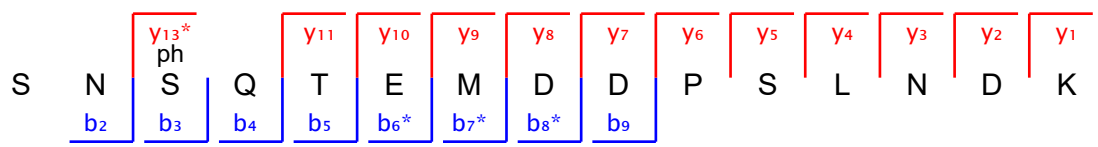

Raw file Scan Method Score m/z  
 sys\_05\_2 15355 FTMS; HCD 84.38 730.83

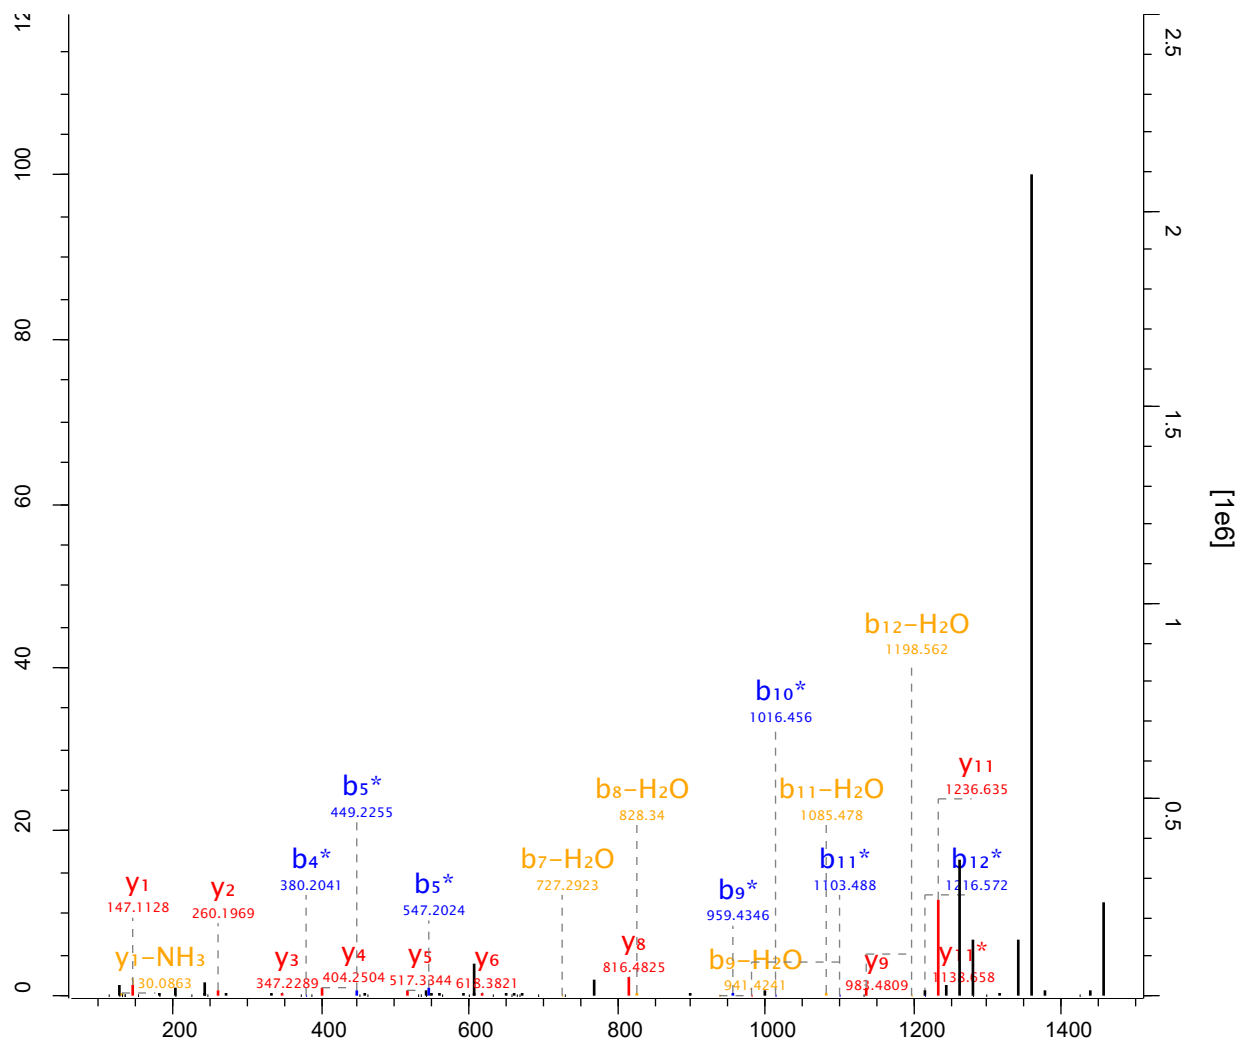

- G S P R S P T T L G S L K -

y<sub>11</sub>
y<sub>9</sub> ph
y<sub>8</sub>
y<sub>6</sub>
y<sub>5</sub>
y<sub>4</sub>
y<sub>3</sub>
y<sub>2</sub>
y<sub>1</sub>

b<sub>4</sub>\*
b<sub>5</sub>\*
b<sub>9</sub>\*
b<sub>10</sub>\*
b<sub>11</sub>\*
b<sub>12</sub>\*

Raw file Scan Method Score m/z  
 sys\_05\_2 15535 FTMS; HCD 50.87 619.29

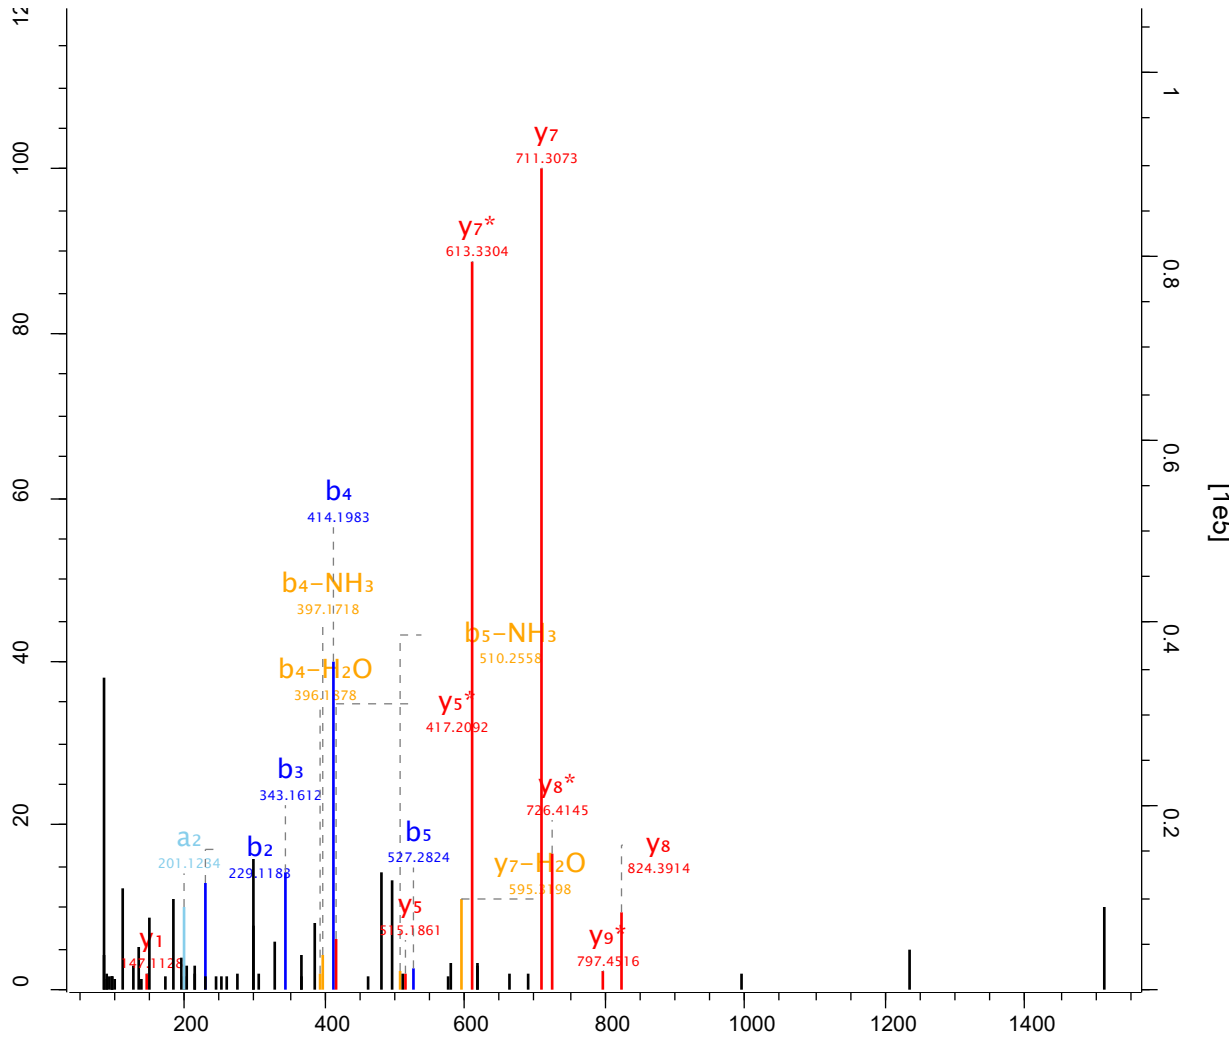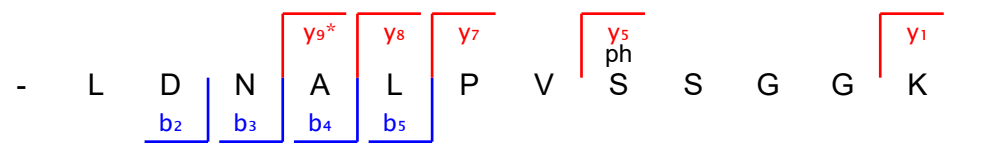

Raw file Scan Method Score m/z  
 sys\_05\_2 15593 FTMS; HCD 40.49 700.31

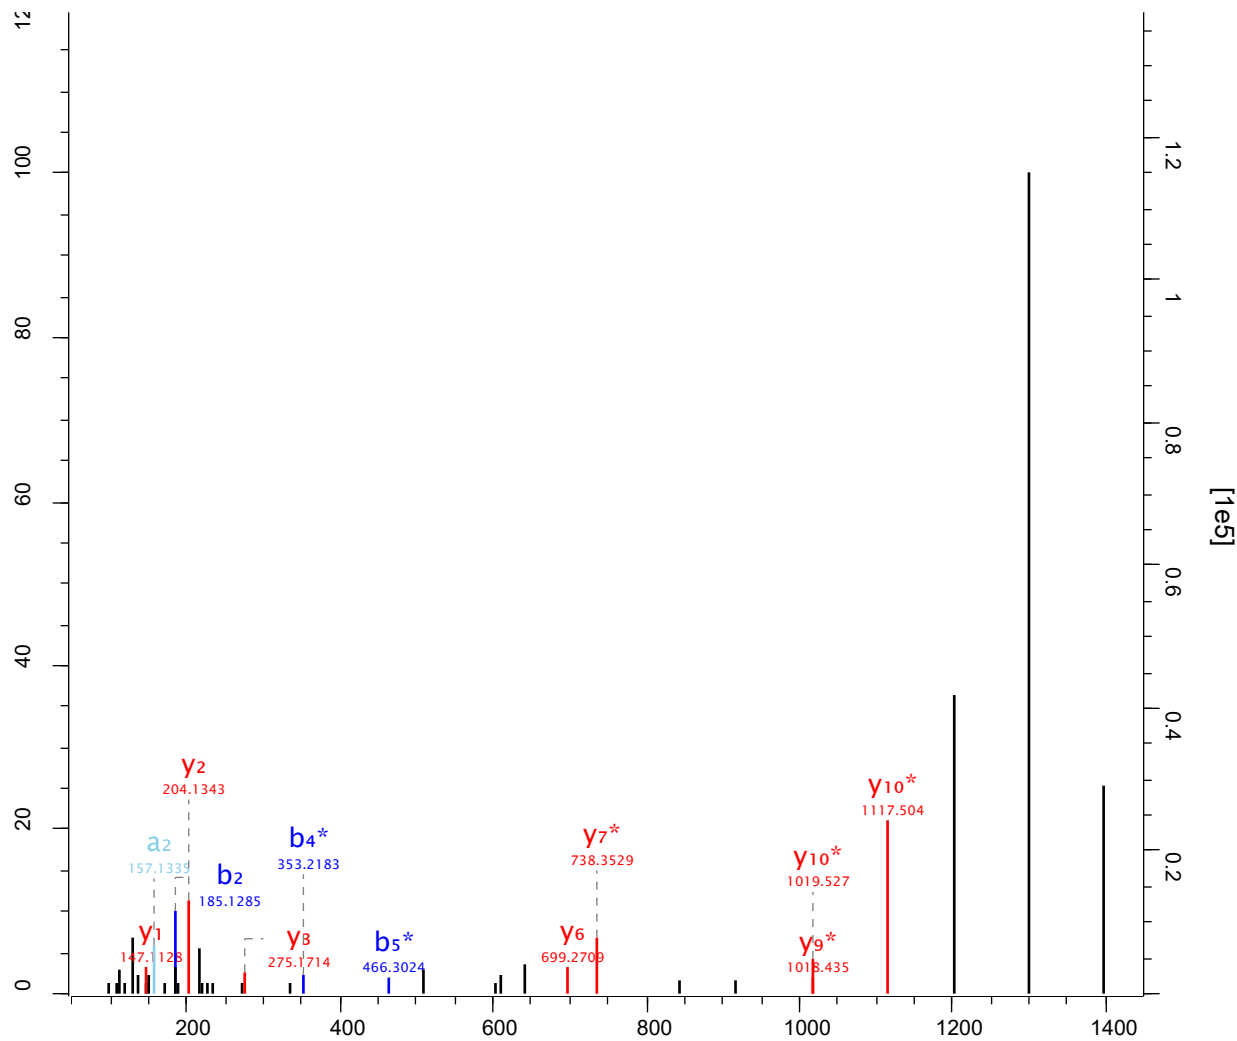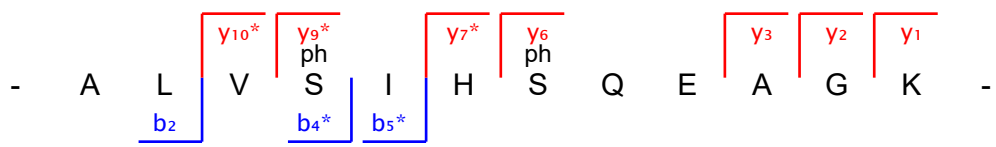

Raw file Scan Method Score m/z  
 sys\_05\_2 15620 FTMS; HCD 74.14 638.34

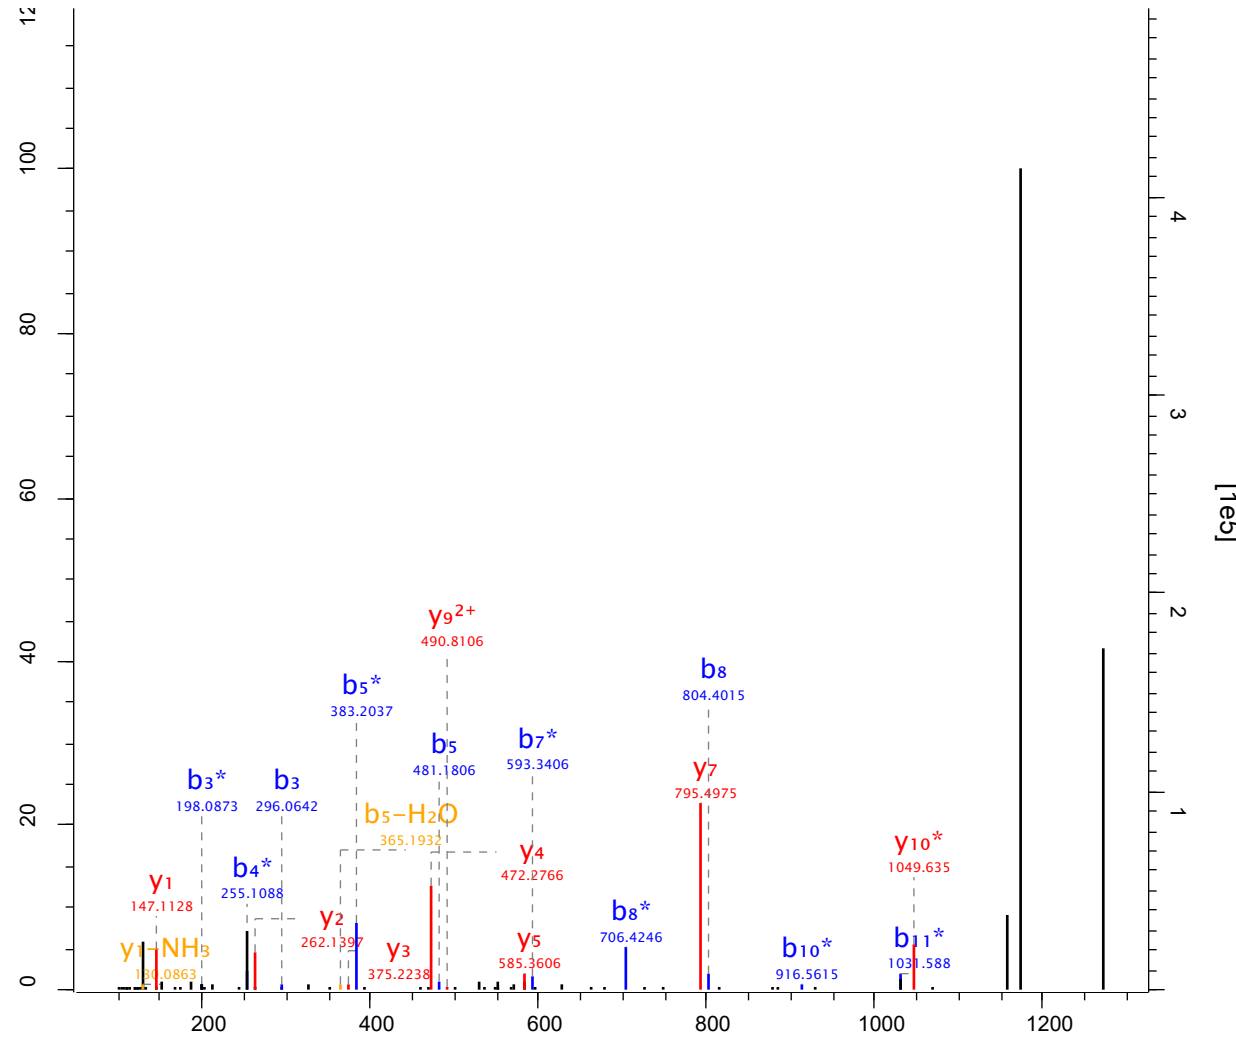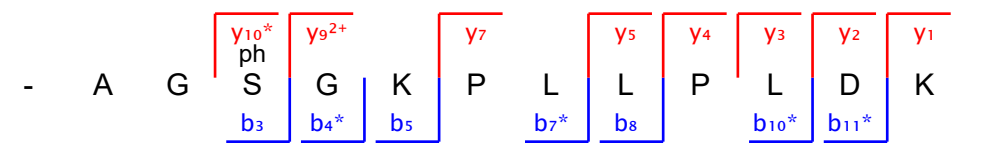

Raw file Scan Method Score m/z  
 sys\_05\_2 15744 FTMS; HCD 59.2 482.24

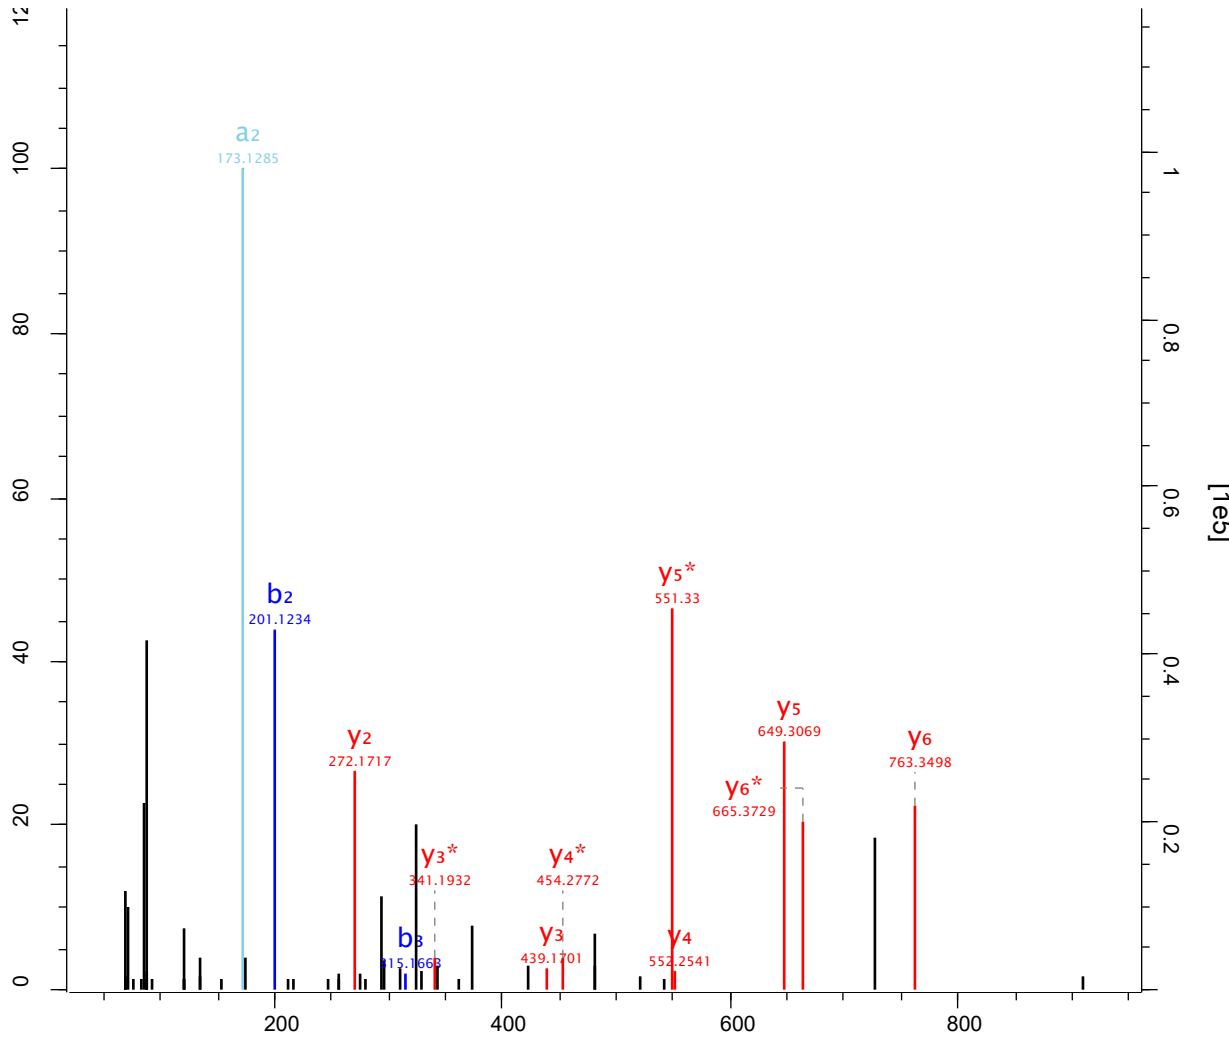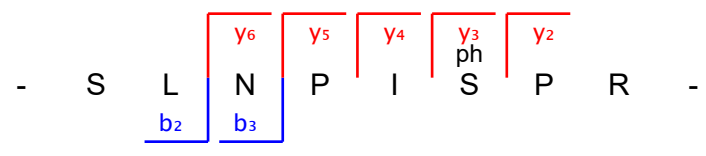



Raw file Scan Method Score m/z  
 sys\_05\_2 15789 FTMS; HCD 64.64 512.26

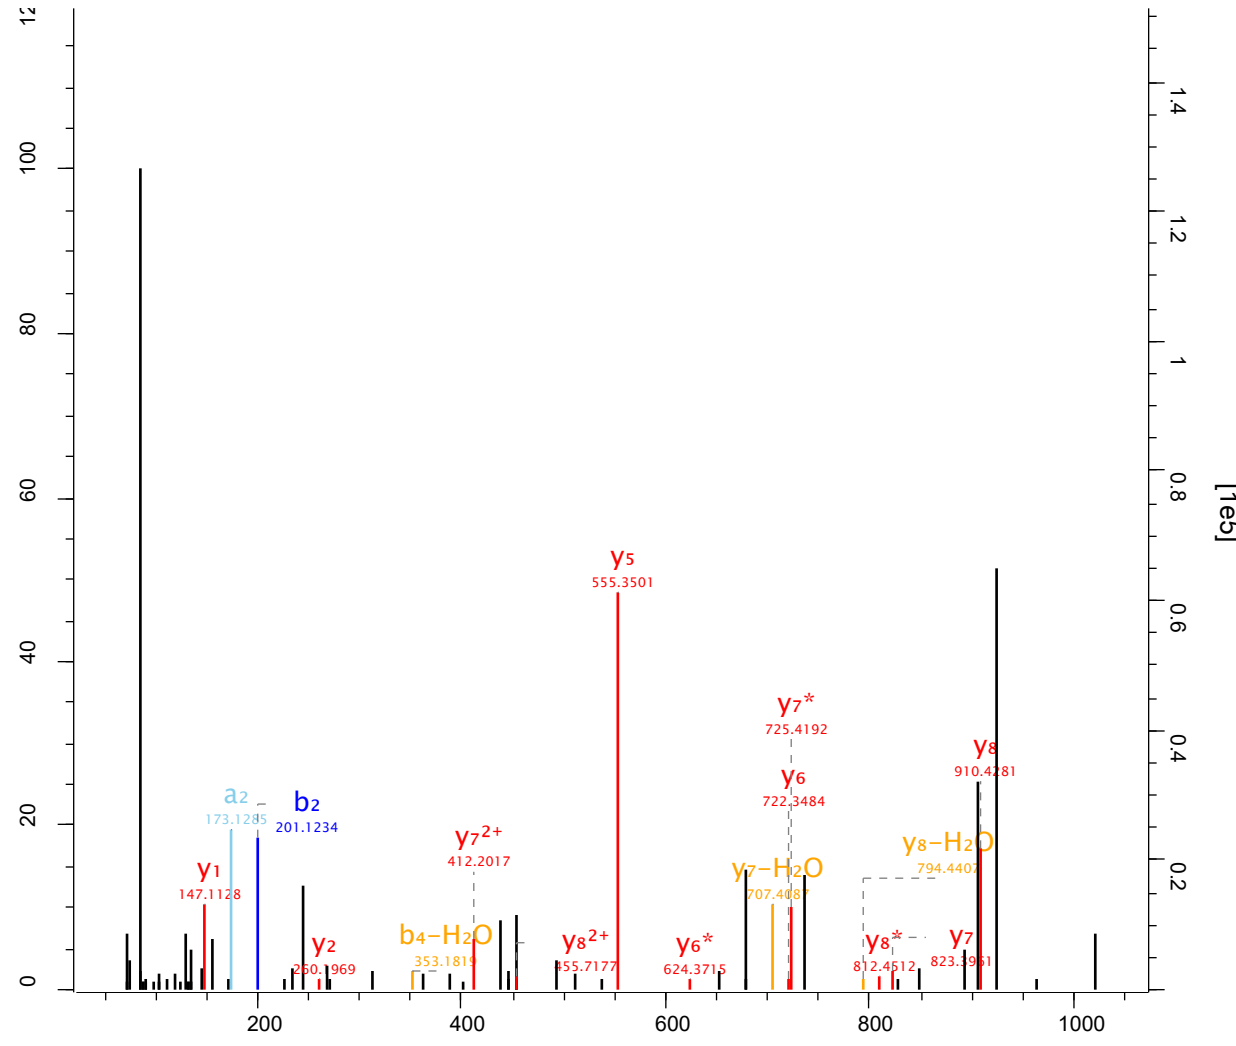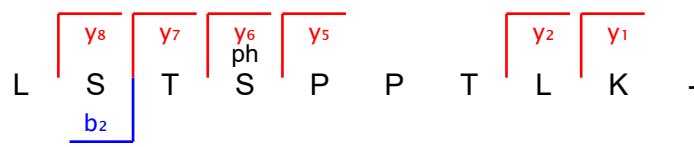

Raw file Scan Method Score m/z  
 sys\_05\_2 15849 FTMS; HCD 225.66 724.83

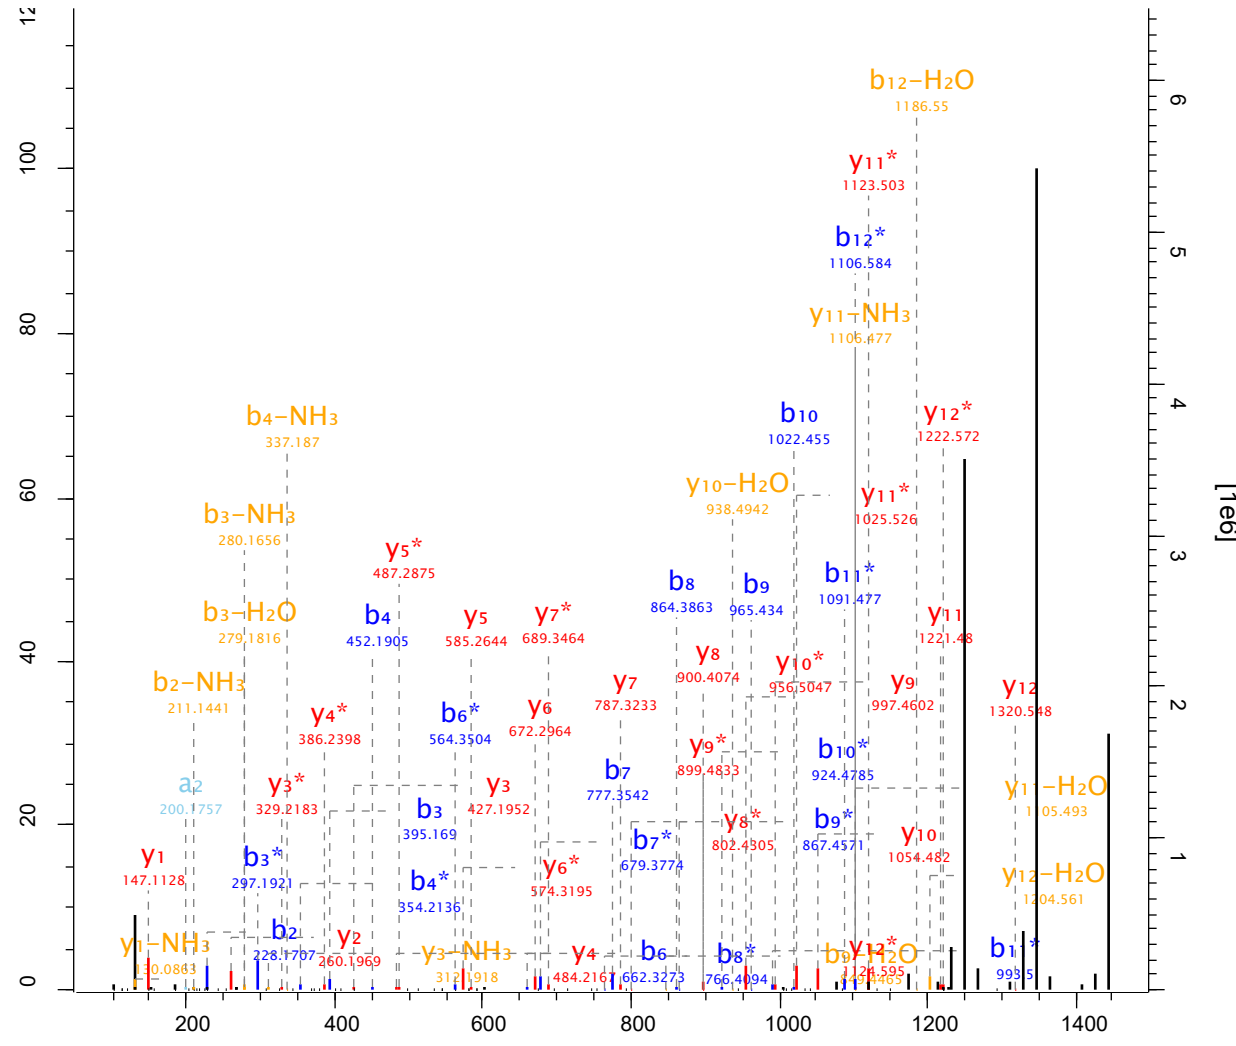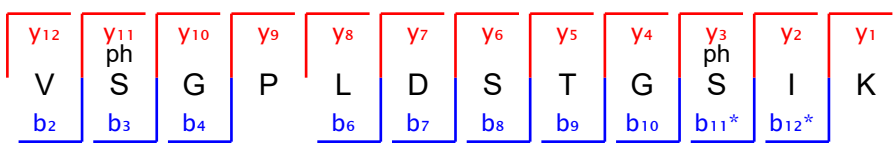

Raw file Scan Method Score m/z  
 sys\_05\_2 15946 FTMS; HCD 67.65 480.23

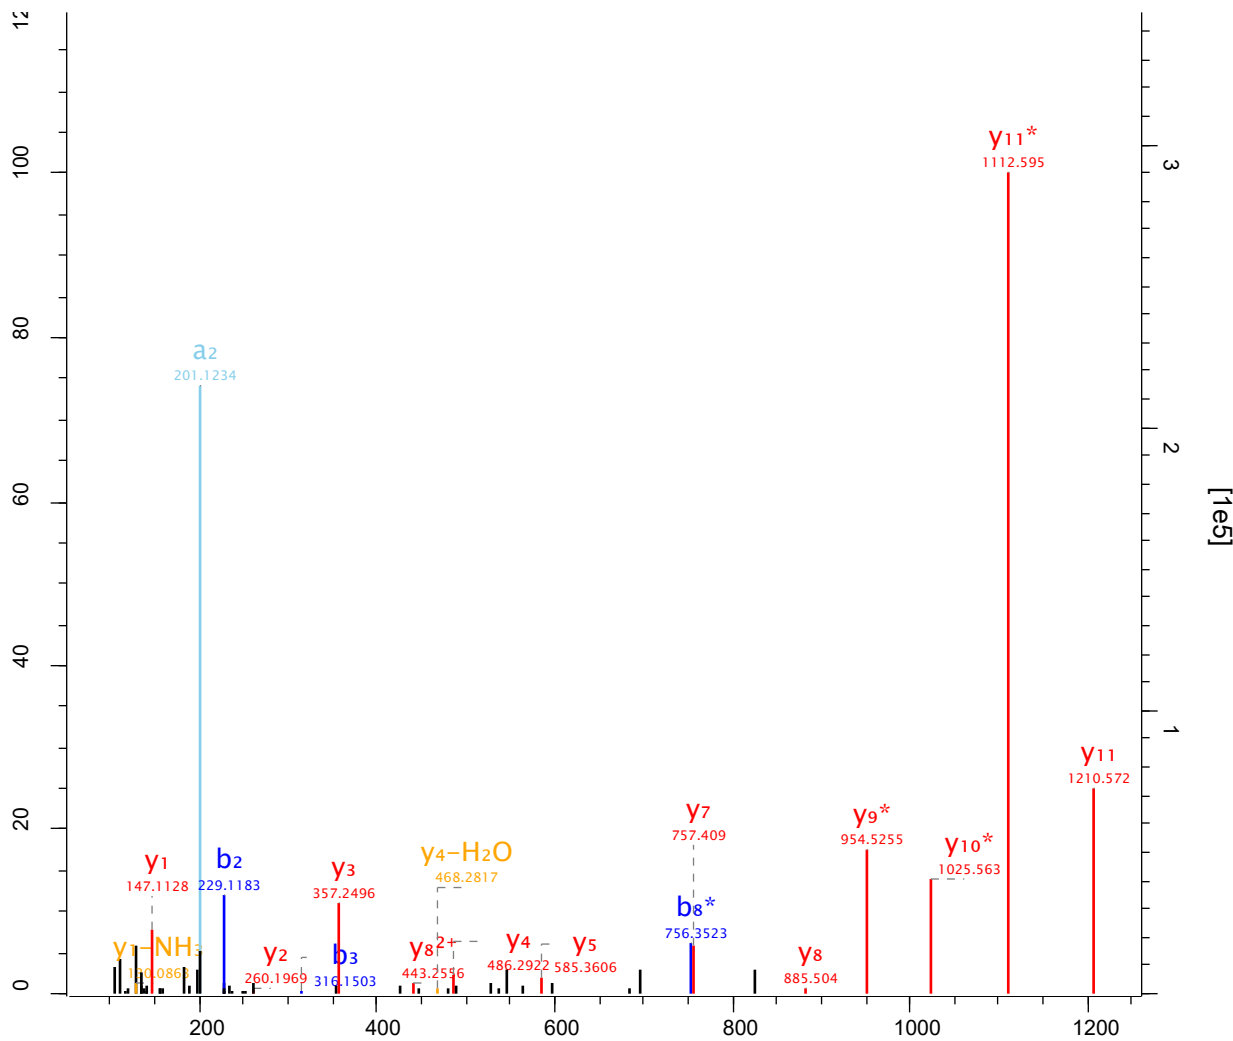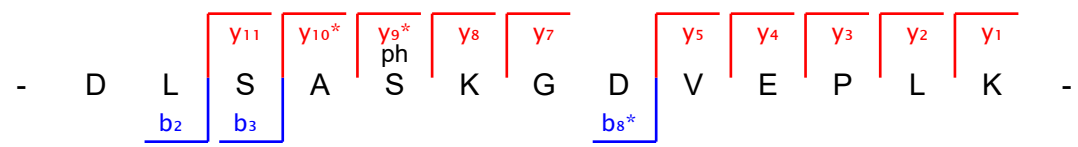

Raw file Scan Method Score m/z  
 sys\_05\_2 16017 FTMS; HCD 111.52 542.26

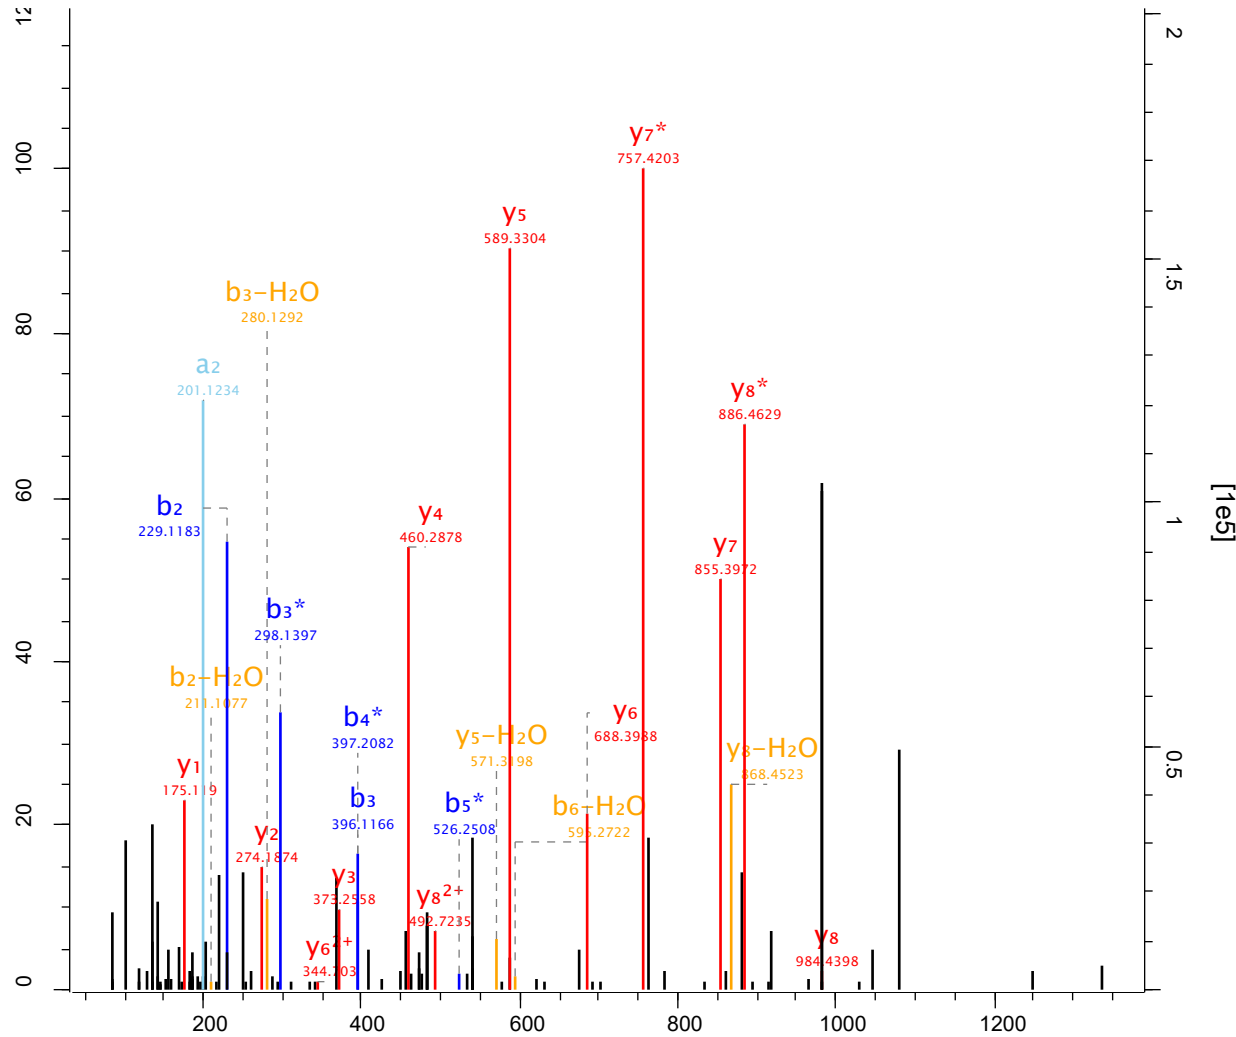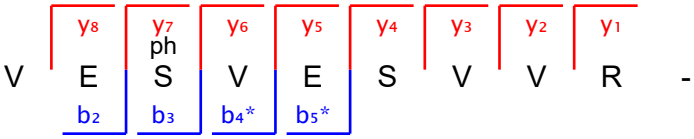

Raw file Scan Method Score m/z  
 sys\_05\_2 16035 FTMS; HCD 254.71 908.41

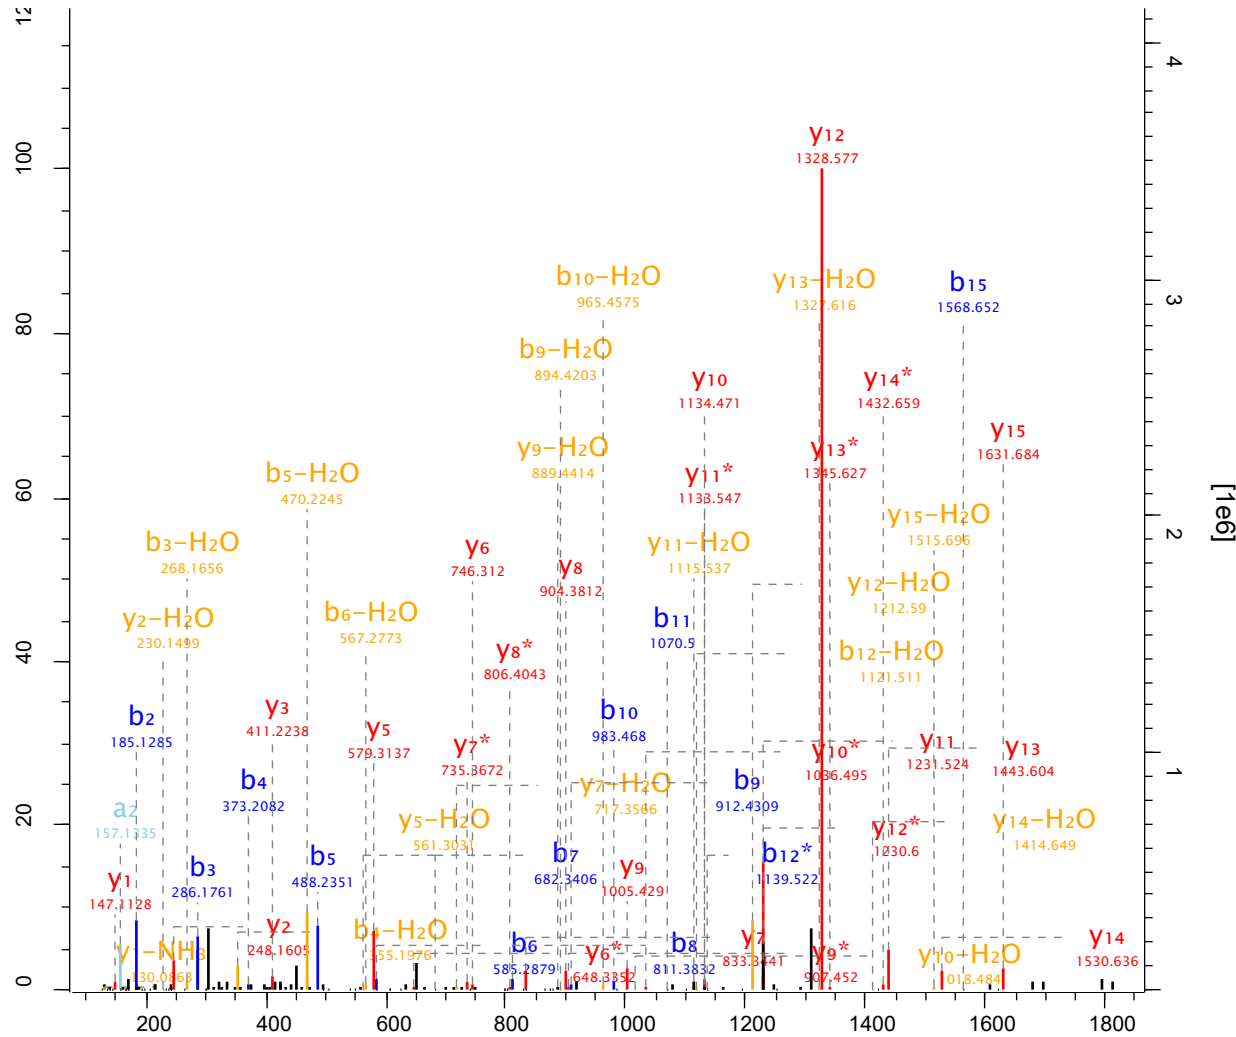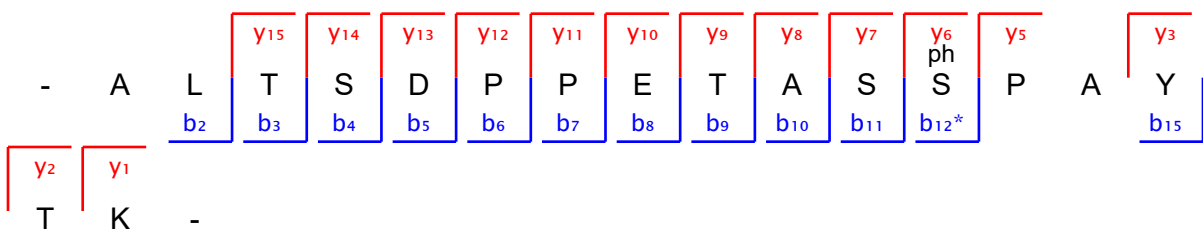

Raw file Scan Method Score m/z  
 sys\_05\_2 16047 FTMS; HCD 103.9 630.25

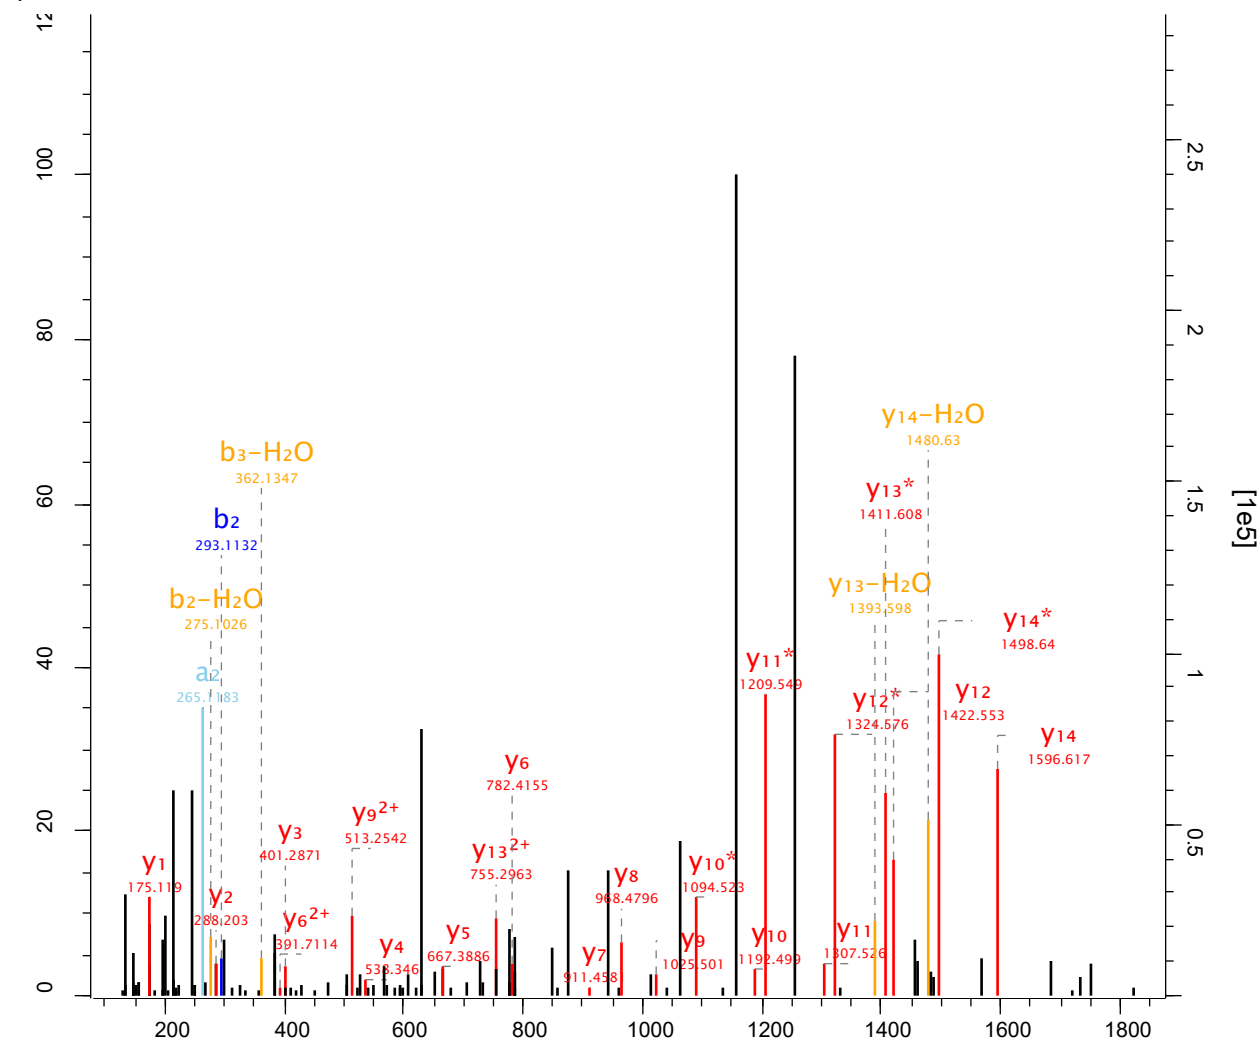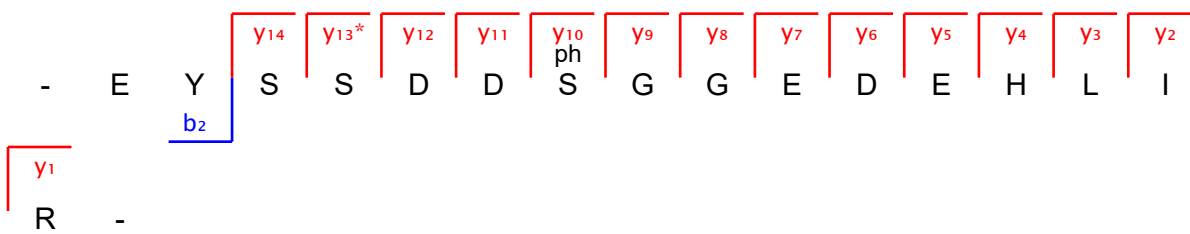

Raw file Scan Method Score m/z  
 sys\_05\_2 16112 FTMS; HCD 42.32 653.62

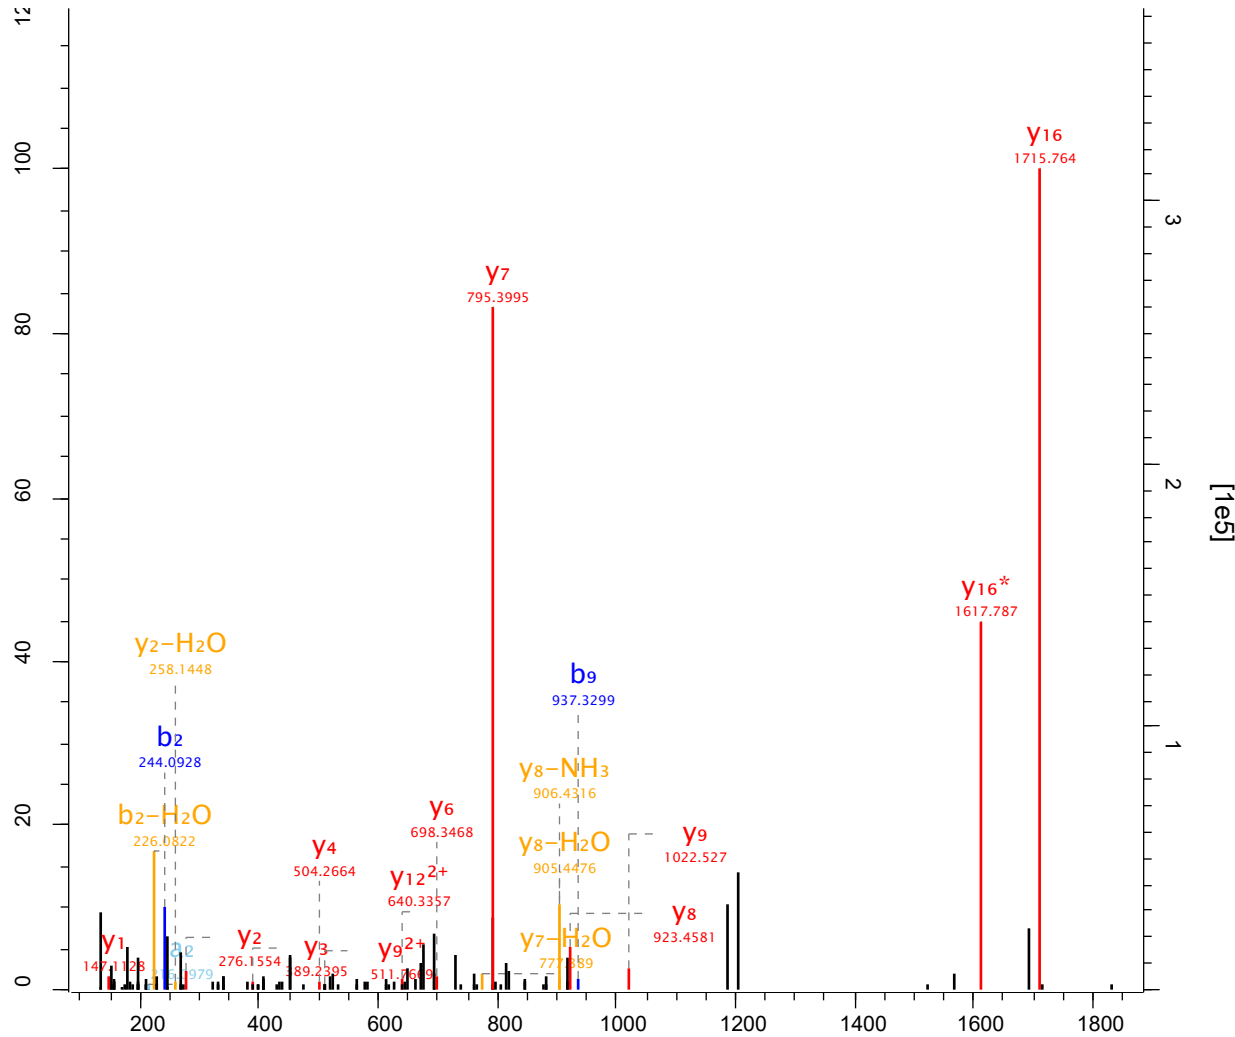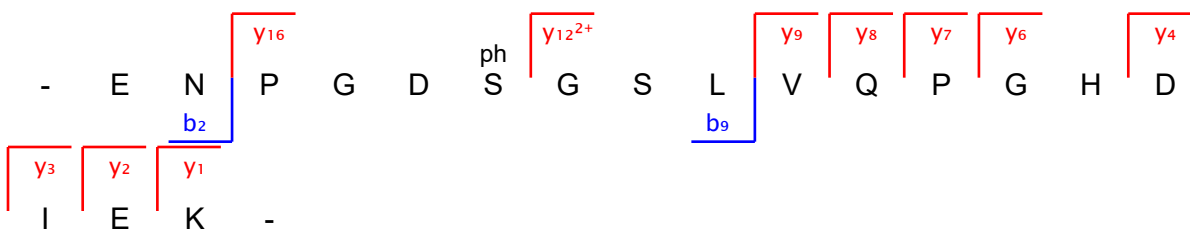

Raw file Scan Method Score m/z  
 sys\_05\_2 16131 FTMS; HCD 95.98 572.74

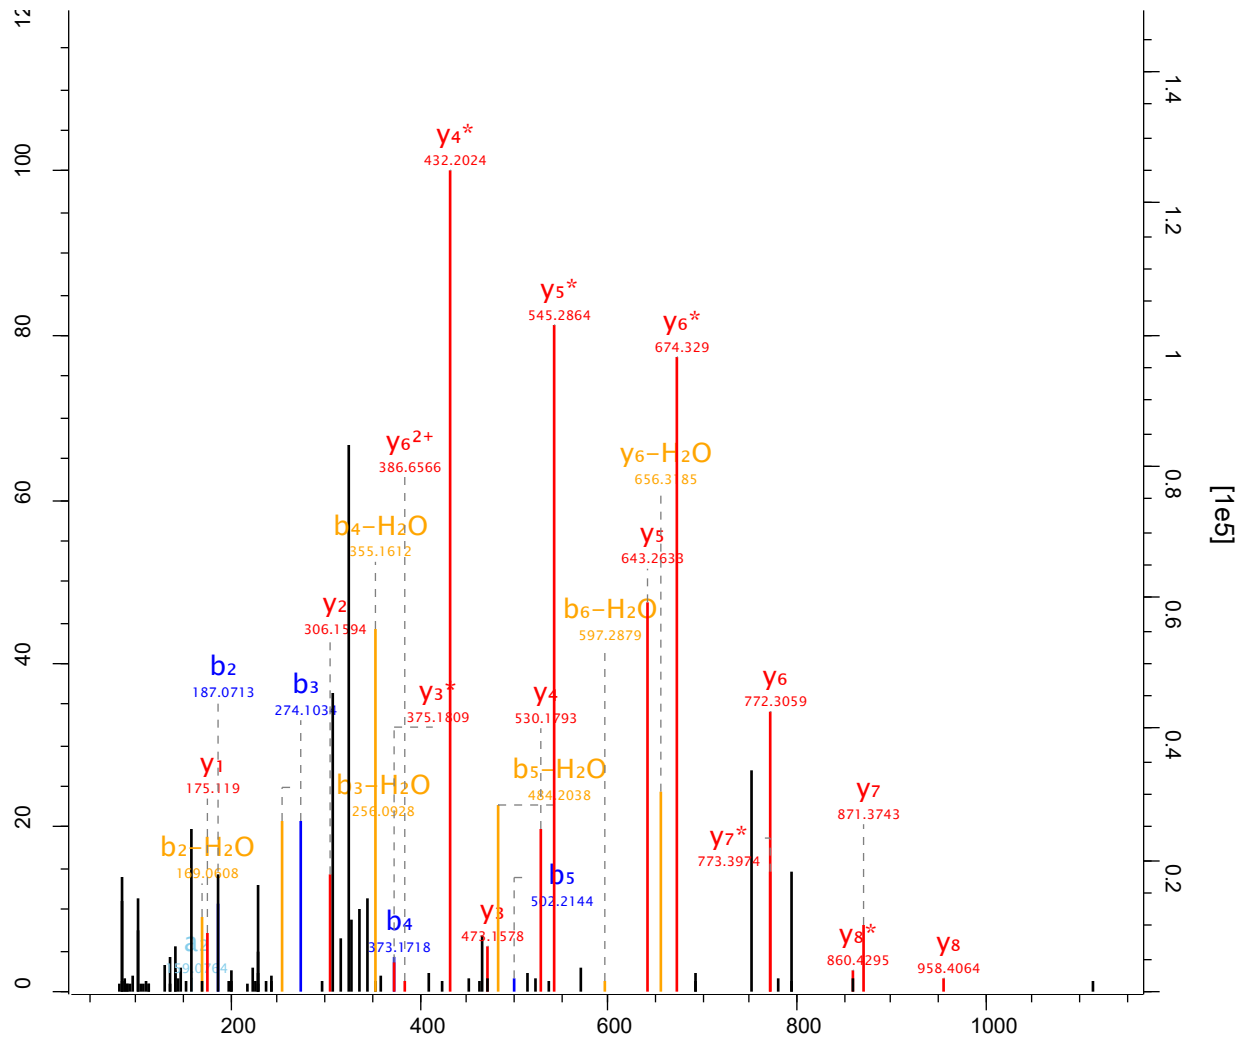

- E G S V E L G S M R -

b<sub>2</sub>
b<sub>3</sub>
b<sub>4</sub>
b<sub>5</sub>
y<sub>8</sub>
y<sub>7</sub>
y<sub>6</sub>
y<sub>5</sub>
y<sub>4</sub>
y<sub>3</sub> ph
y<sub>2</sub>
y<sub>1</sub>



Raw file Scan Method Score m/z  
 sys\_05\_2 16235 FTMS; HCD 114.63 705.78

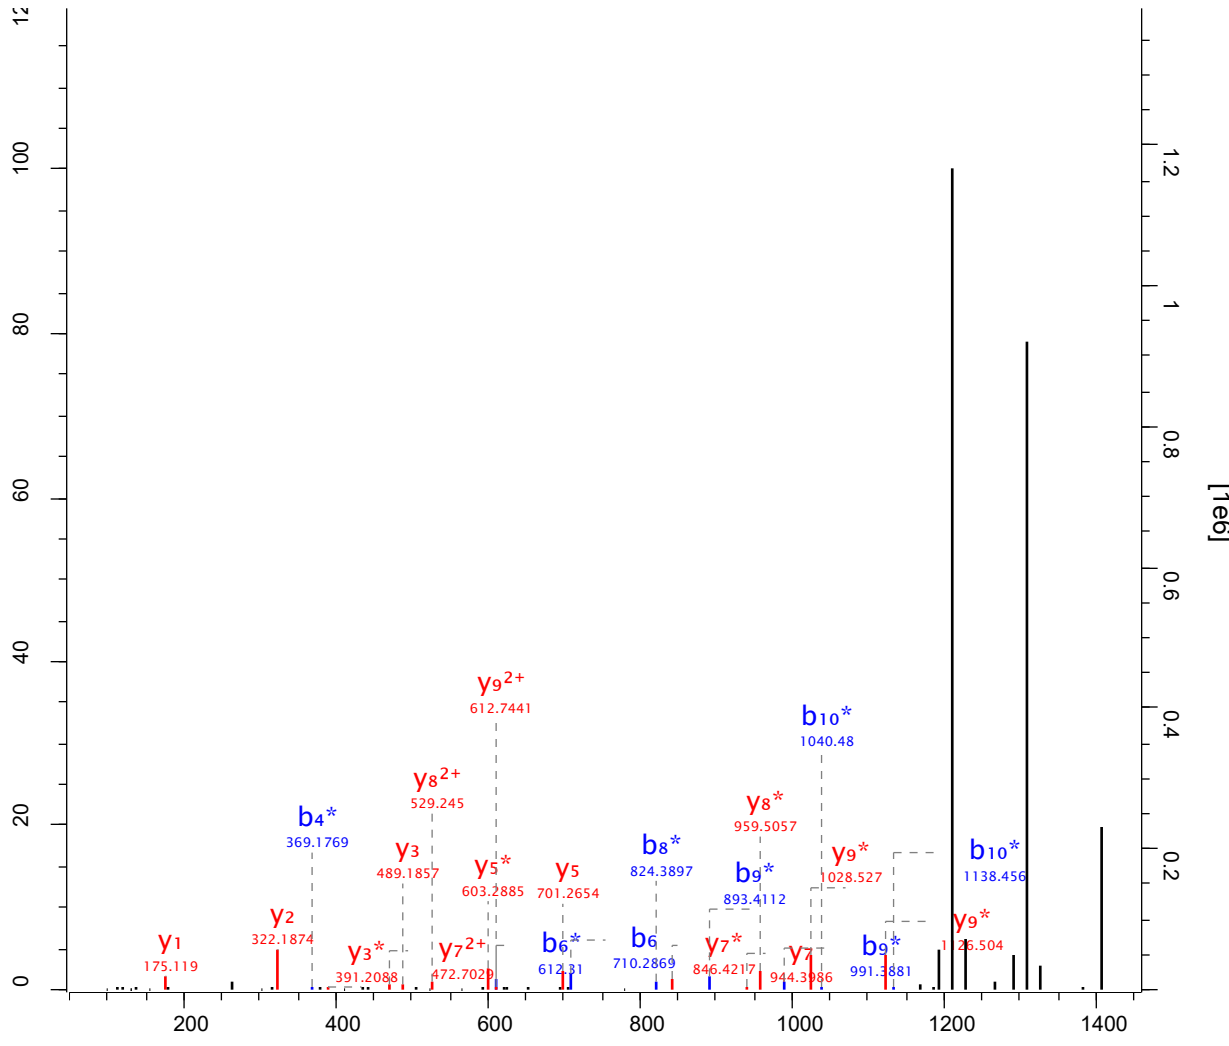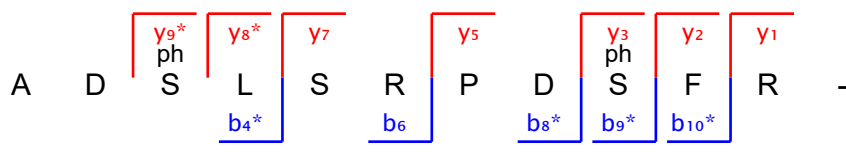

Raw file Scan Method Score m/z  
 sys\_05\_2 16362 FTMS; HCD 100.04 741.31

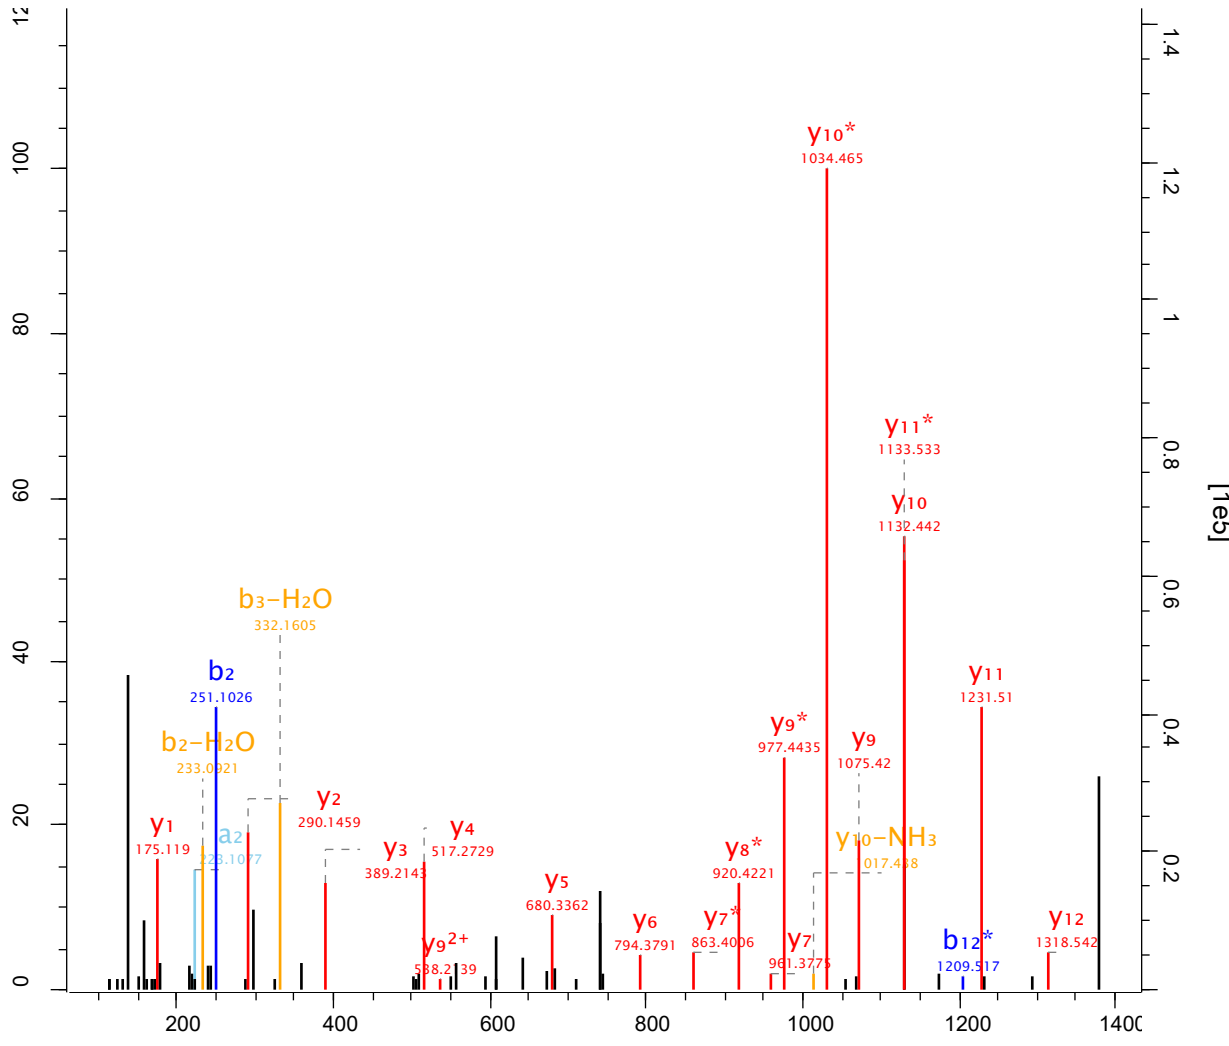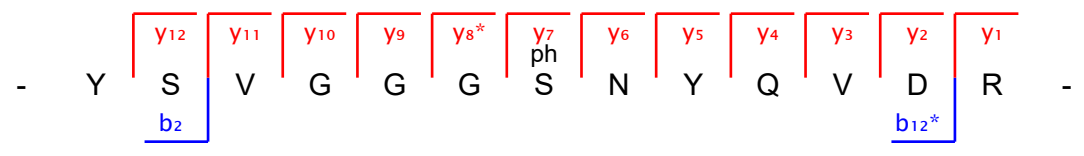

Raw file Scan Method Score m/z  
 sys\_05\_2 16368 FTMS; HCD 259.77 782.85

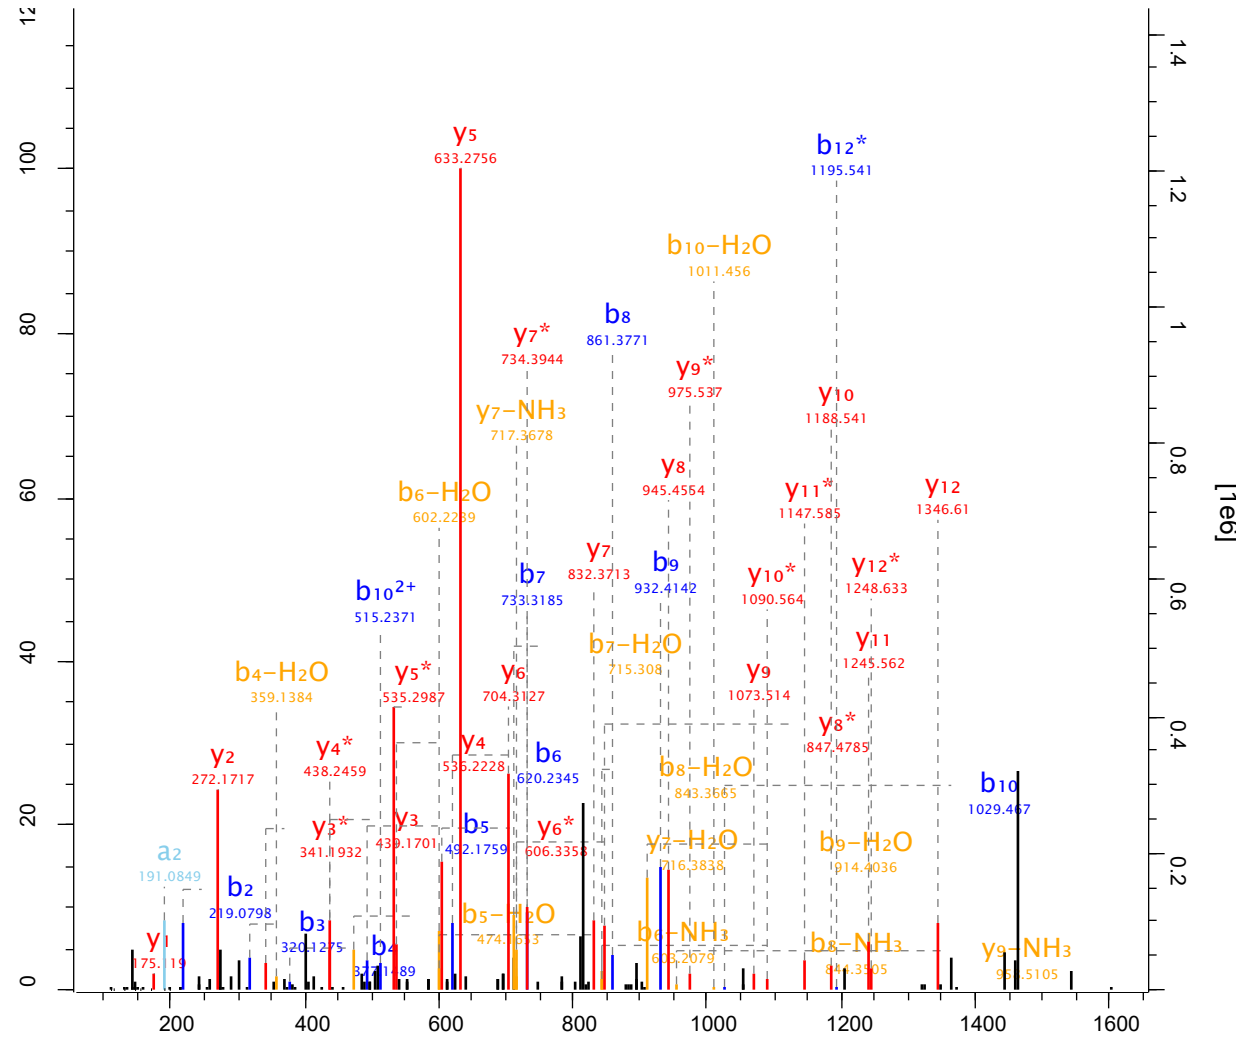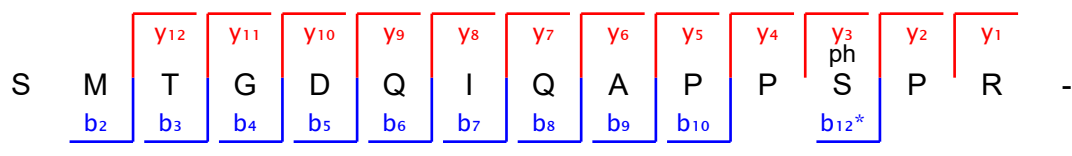

Raw file Scan Method Score m/z  
 sys\_05\_2 16387 FTMS; HCD 77.18 607.73

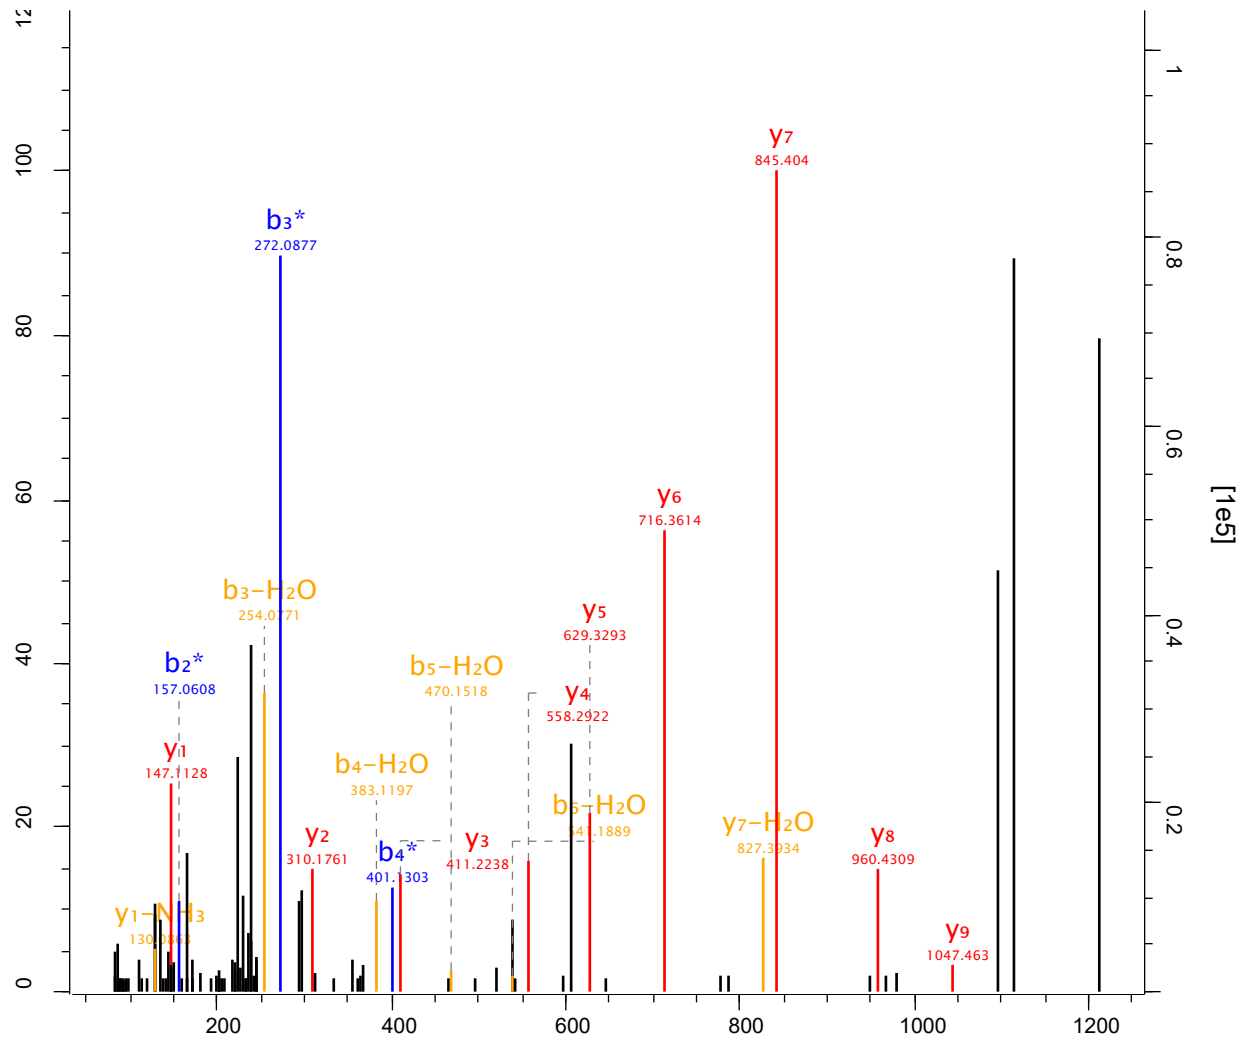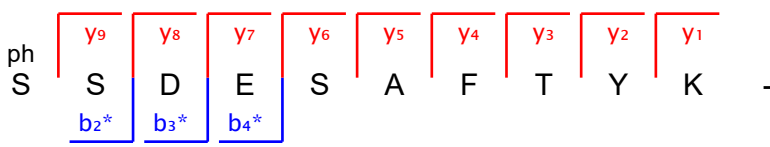

Raw file Scan Method Score m/z  
 sys\_05\_2 16600 FTMS; HCD 124.42 633.81

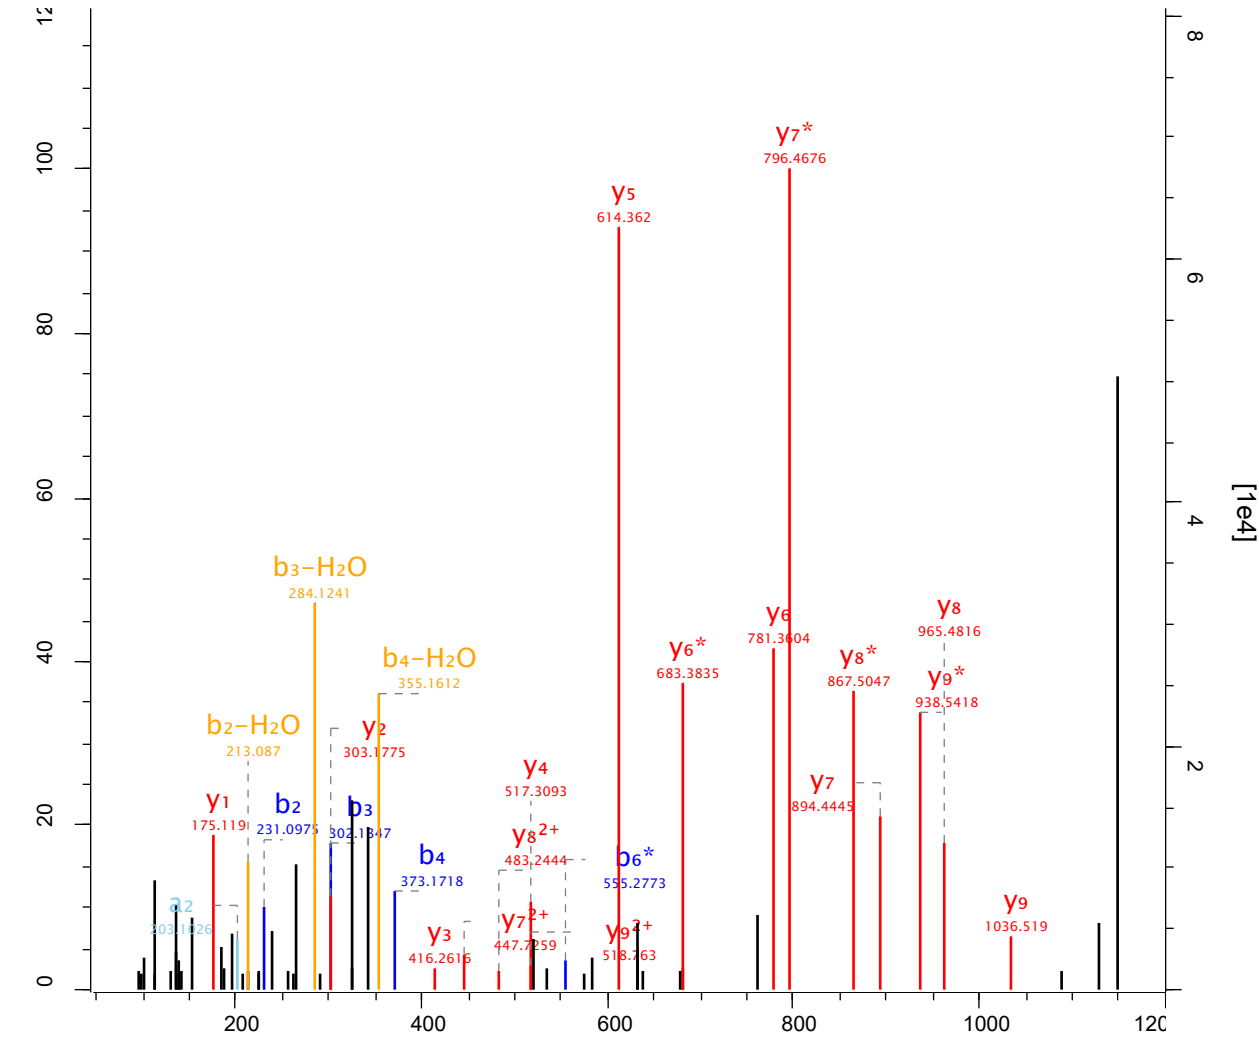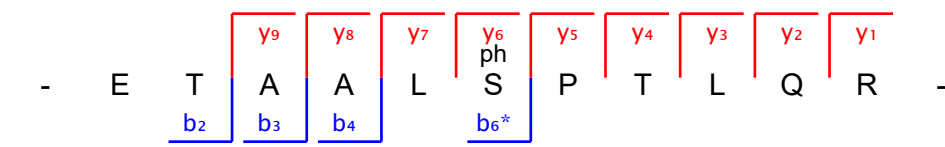

Raw file Scan Method Score m/z  
 sys\_05\_2 16605 FTMS; HCD 214.58 643.79

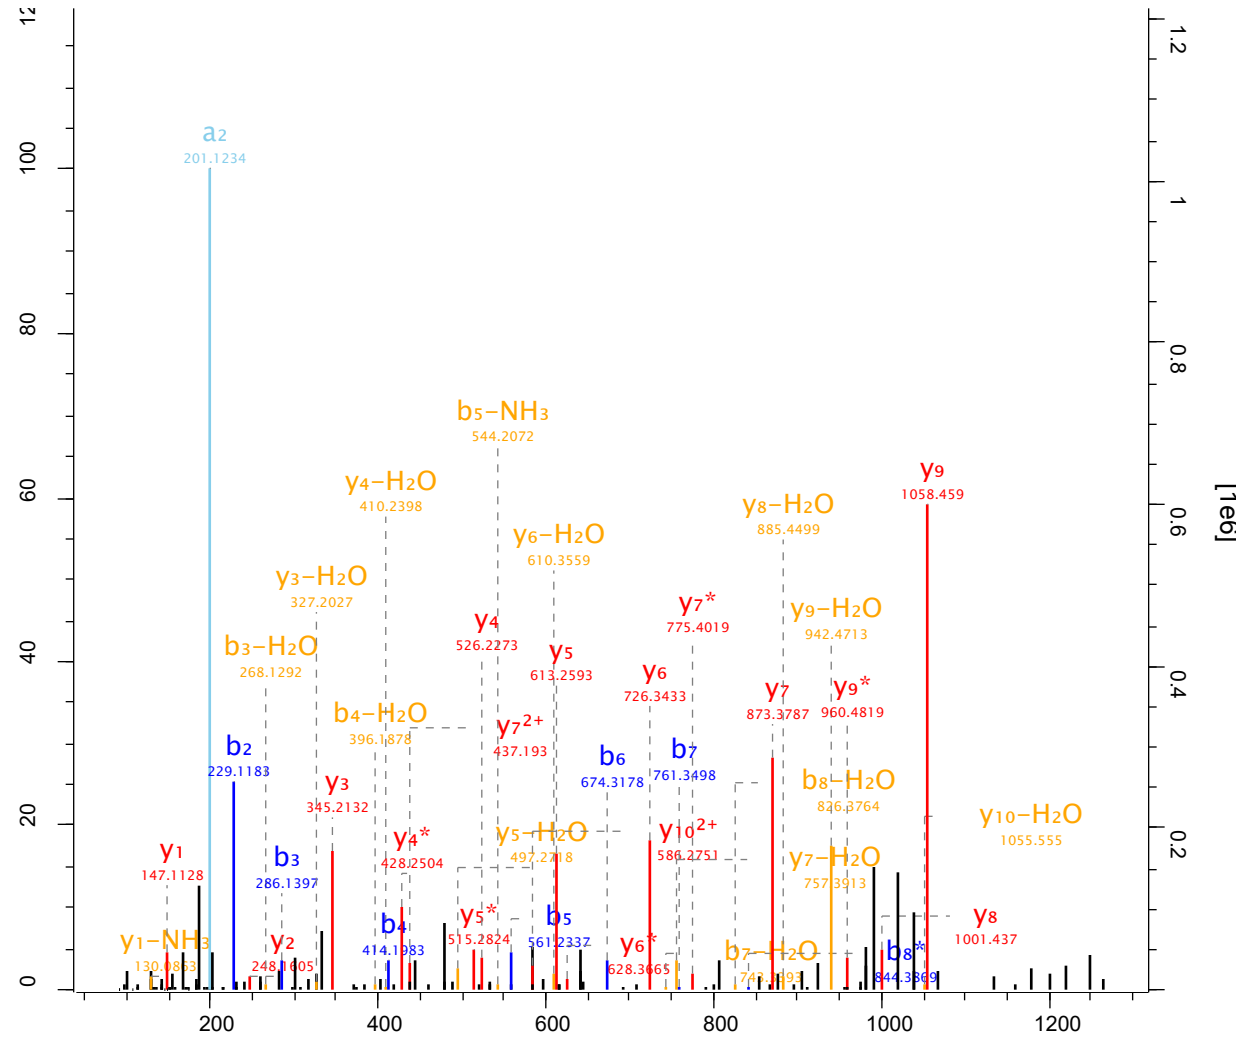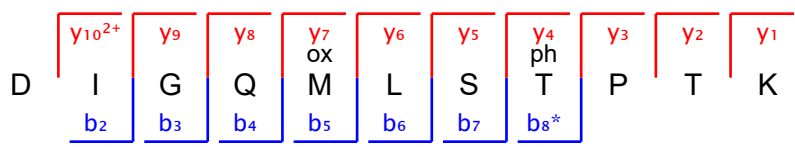

Raw file Scan Method Score m/z  
 sys\_05\_2 16696 FTMS; HCD 162.29 692.81

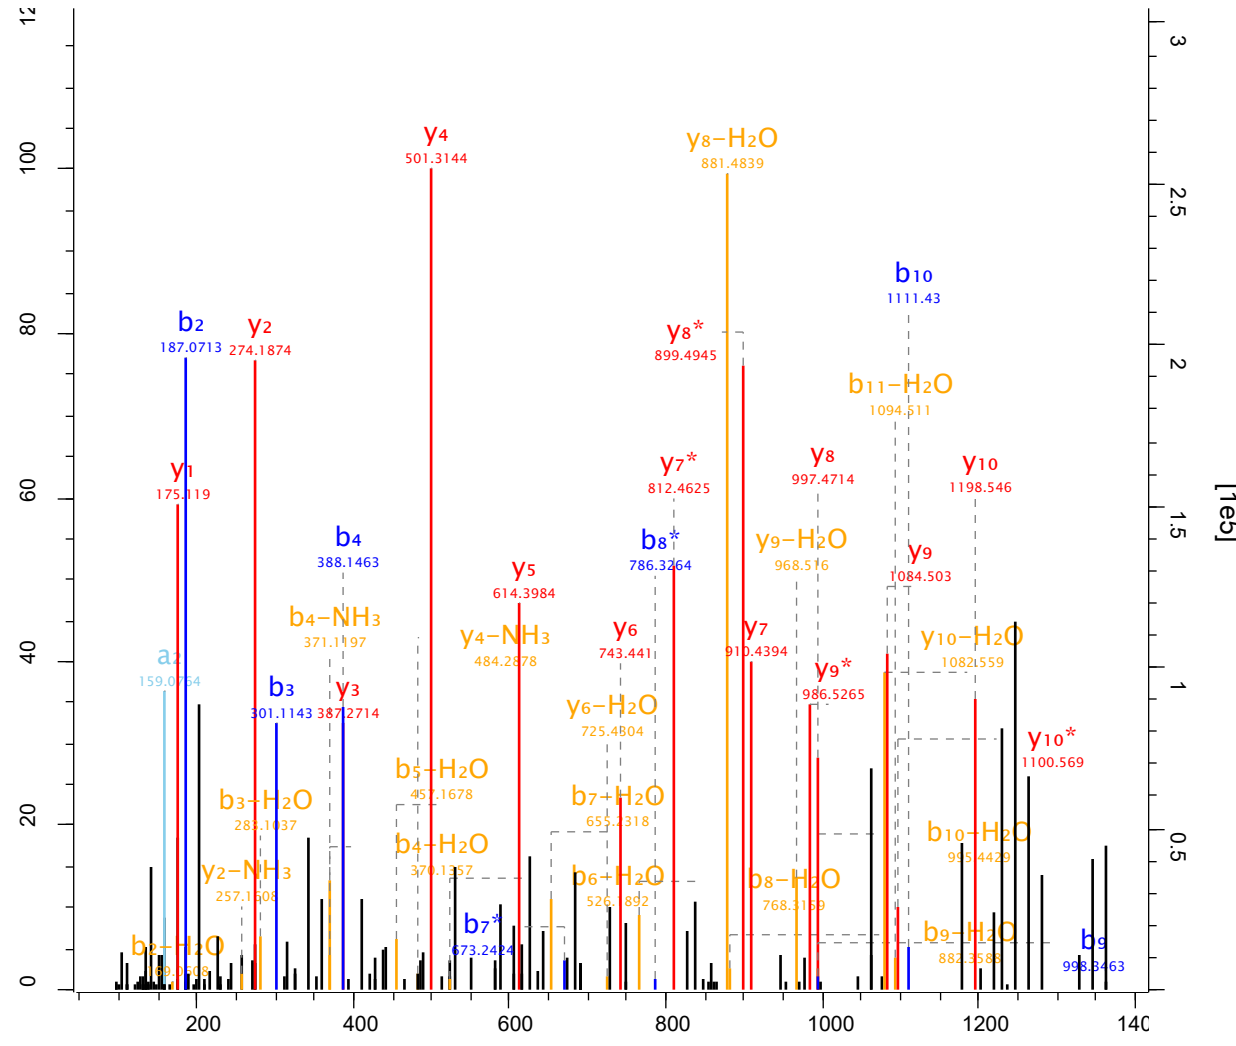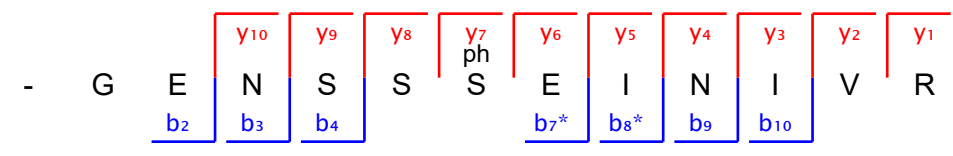

Raw file Scan Method Score m/z  
 sys\_05\_2 16794 FTMS; HCD 68.97 488.91

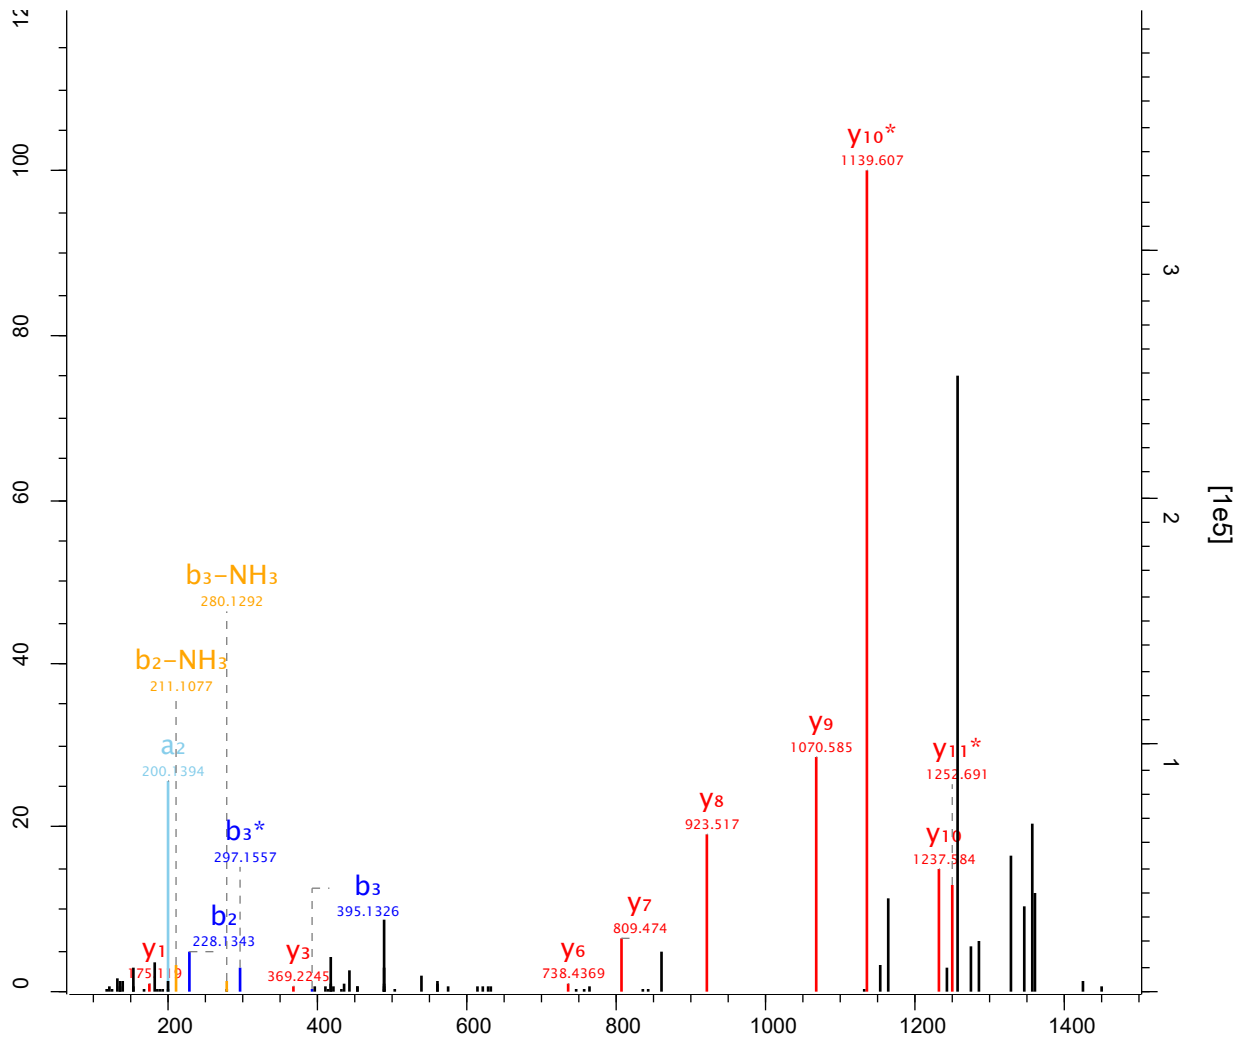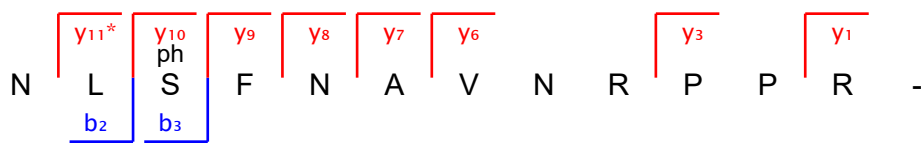



Raw file Scan Method Score m/z  
 sys\_05\_2 16806 FTMS; HCD 82.65 578.22

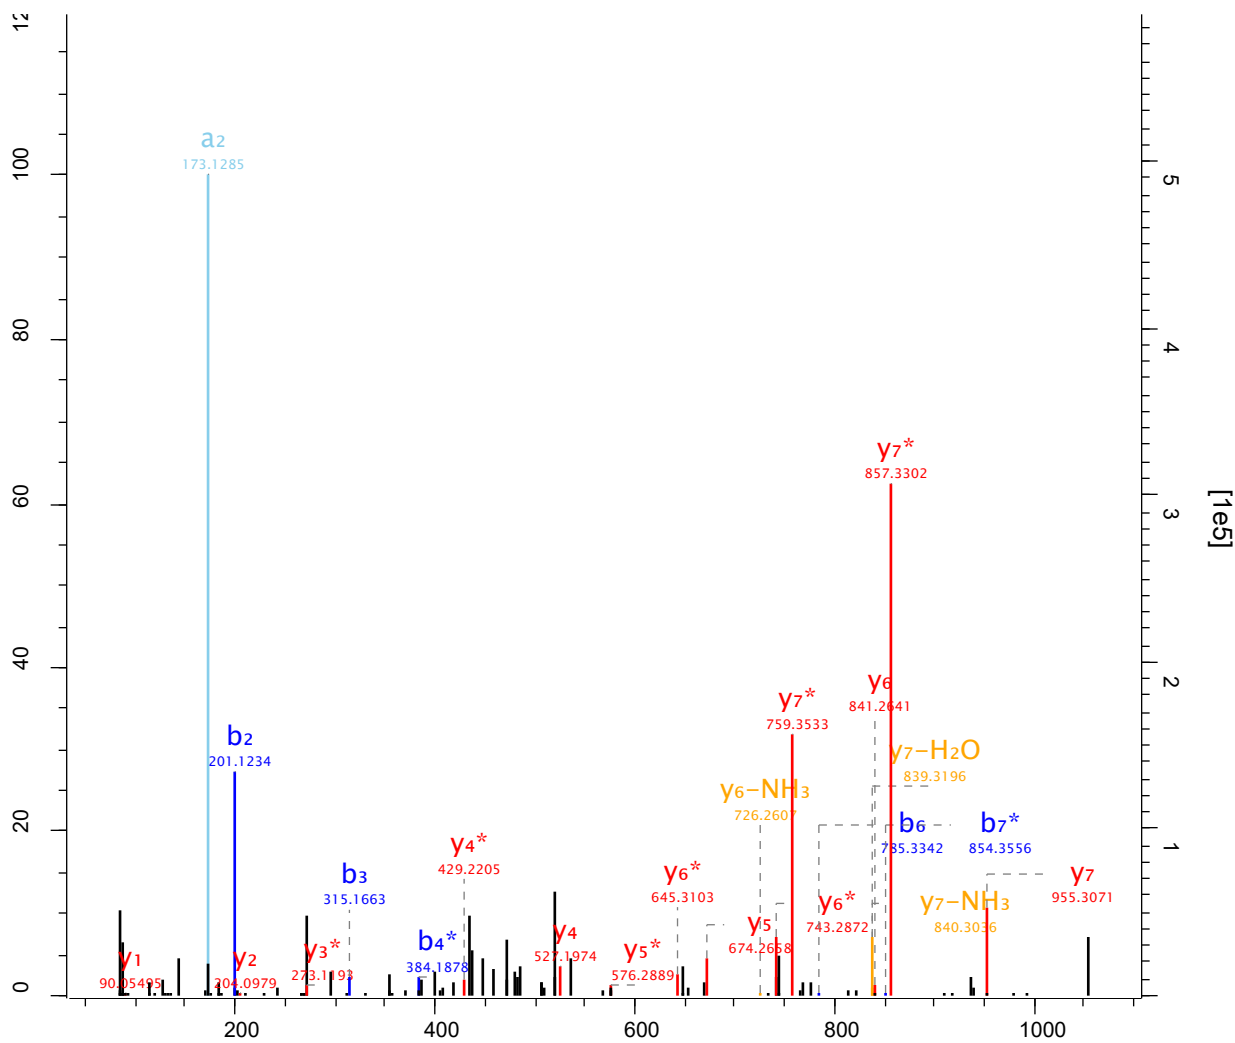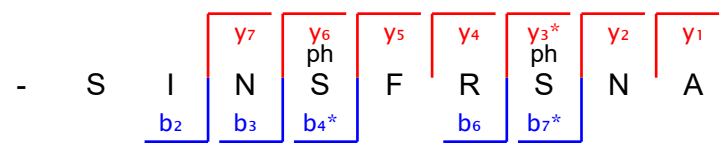



Raw file Scan Method Score m/z  
 sys\_05\_2 16934 FTMS; HCD 50.9 530.58

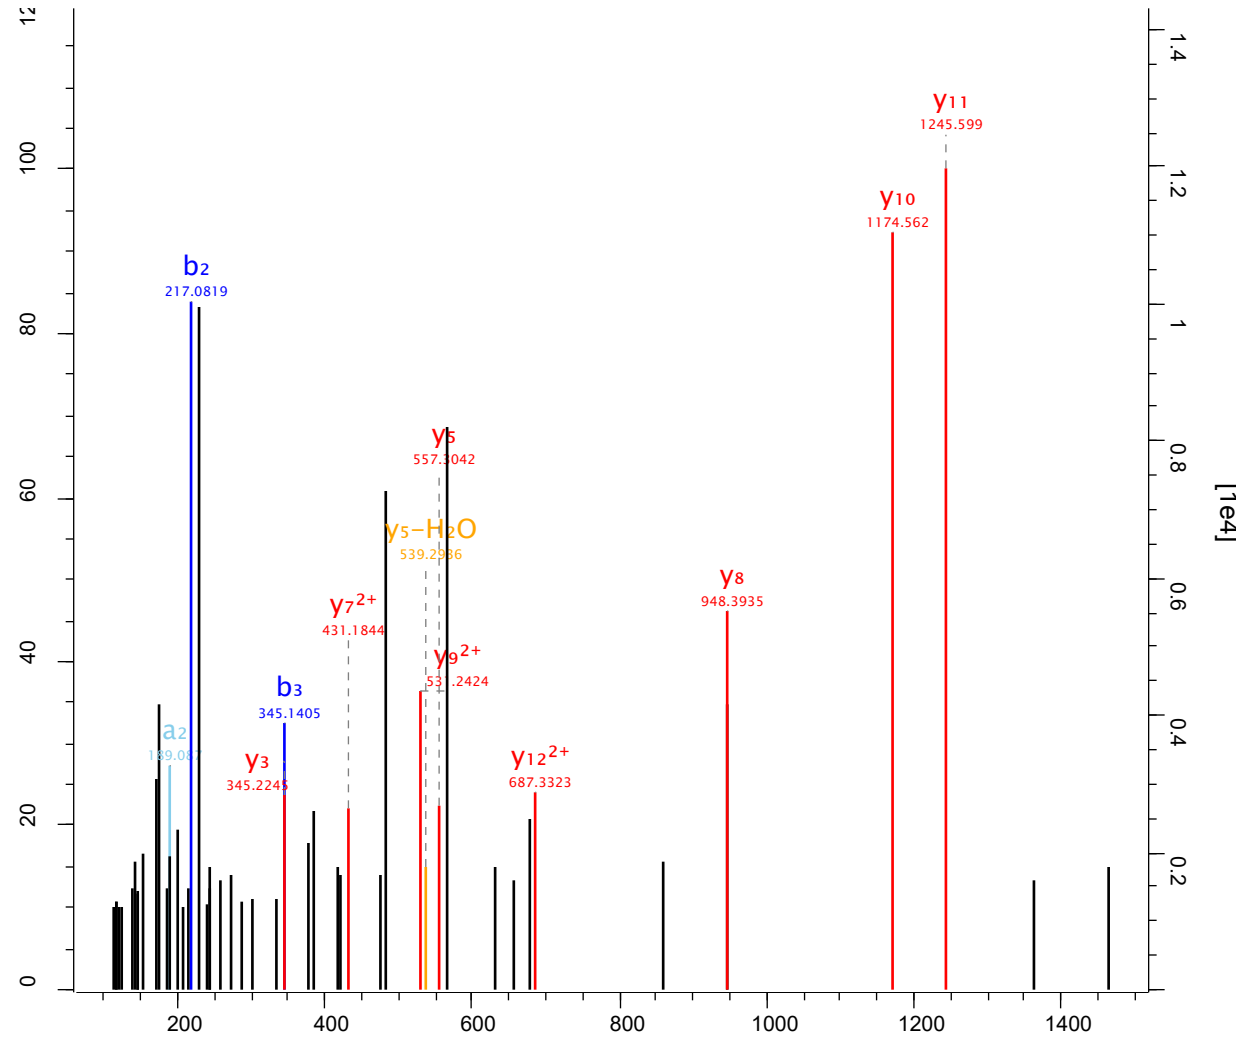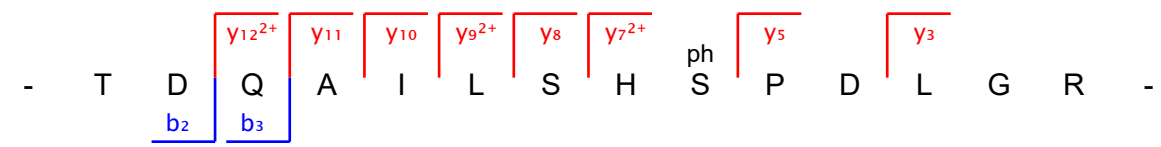

Raw file Scan Method Score m/z  
 sys\_05\_2 16945 FTMS; HCD 171.26 729.82

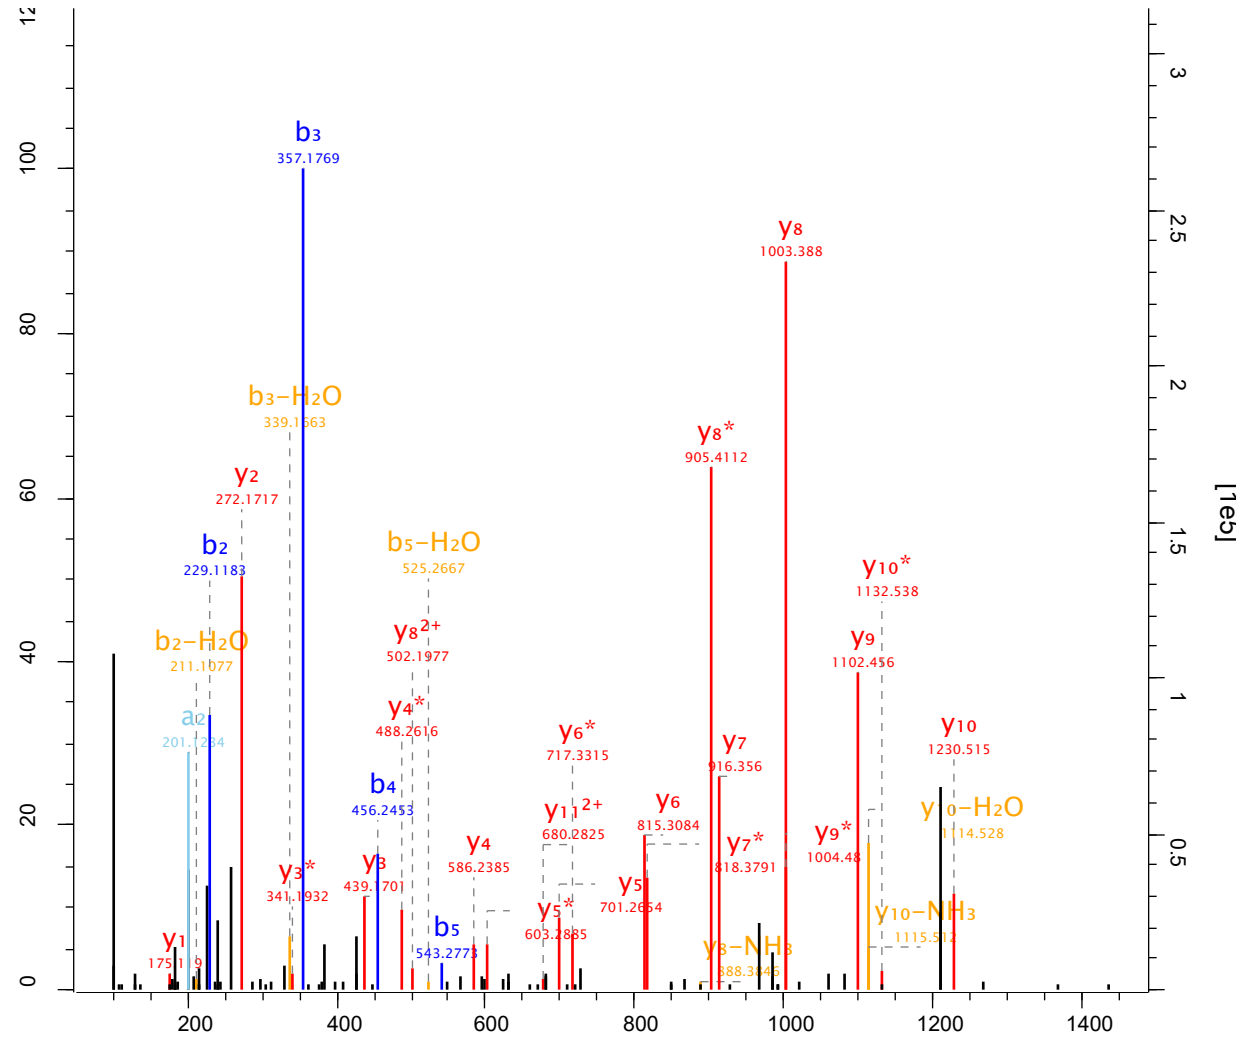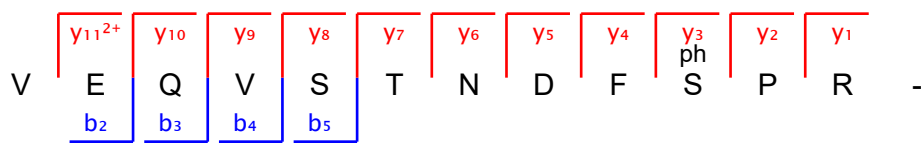

Raw file Scan Method Score m/z  
 sys\_05\_2 16965 FTMS; HCD 49.45 571.27

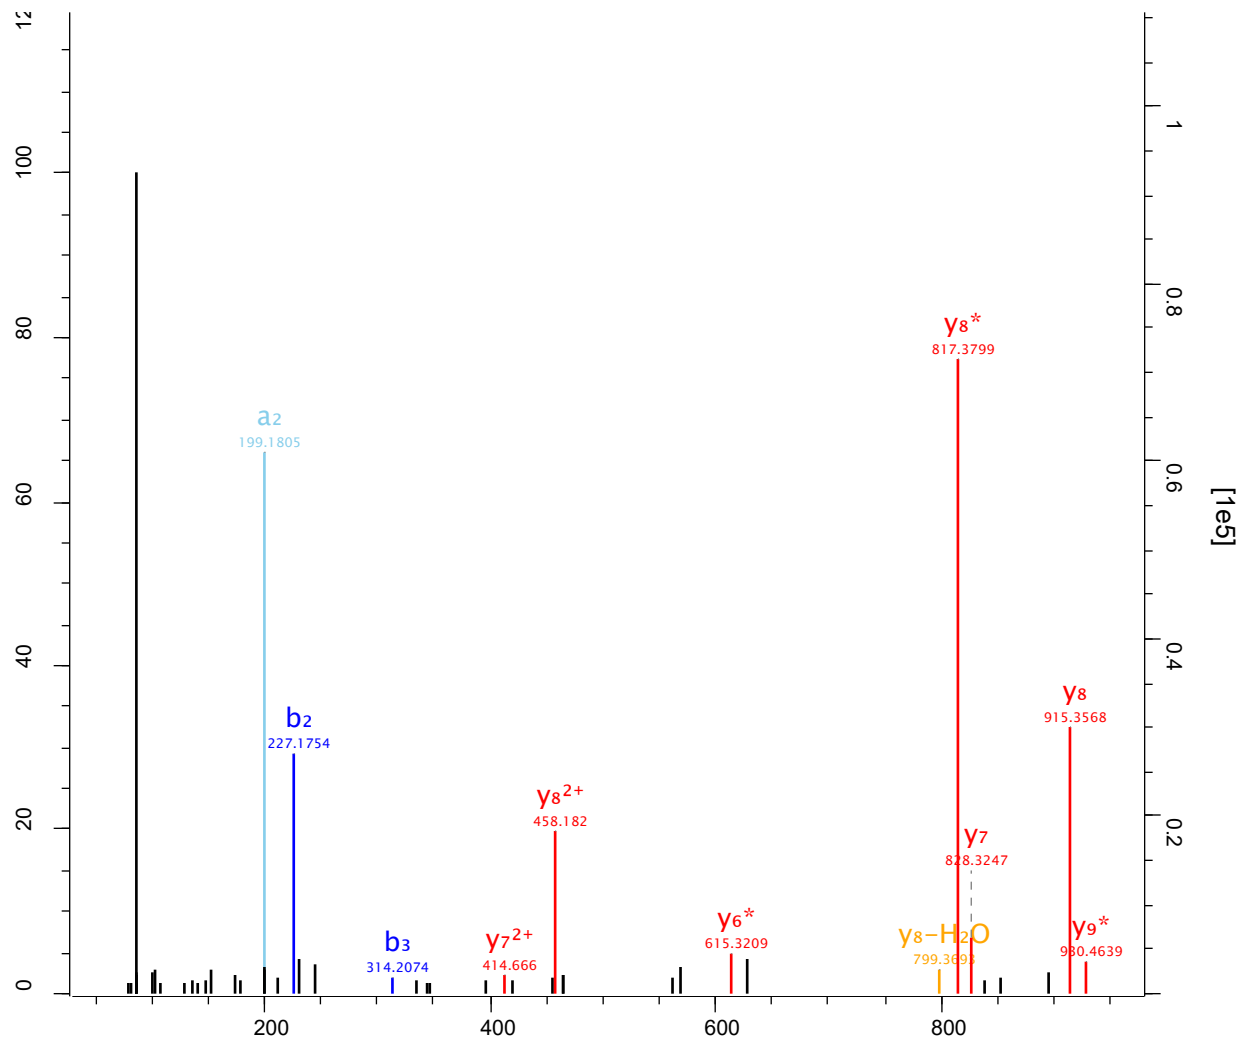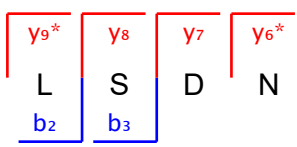

ph S V A S R -

Raw file Scan Method Score m/z  
 sys\_05\_2 16978 FTMS; HCD 197.38 762.33

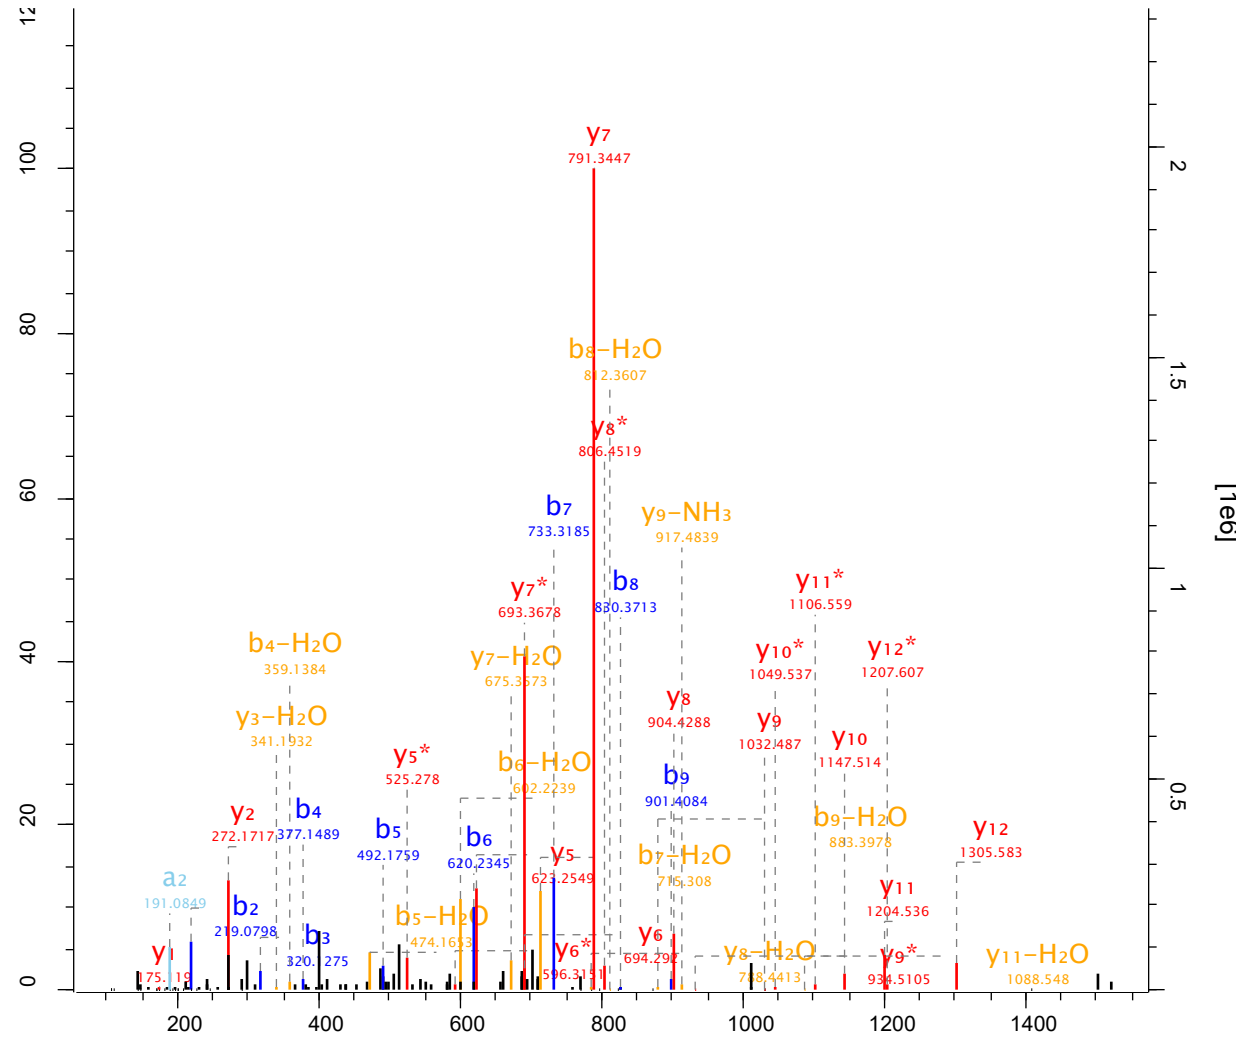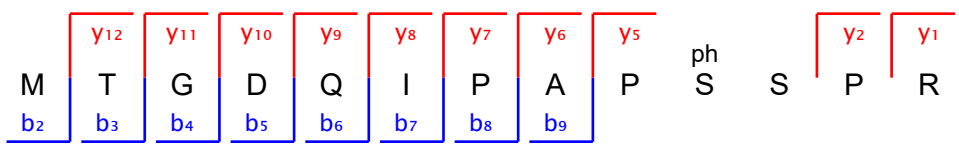

Raw file Scan Method Score m/z  
 sys\_05\_2 17000 FTMS; HCD 144.73 644.77

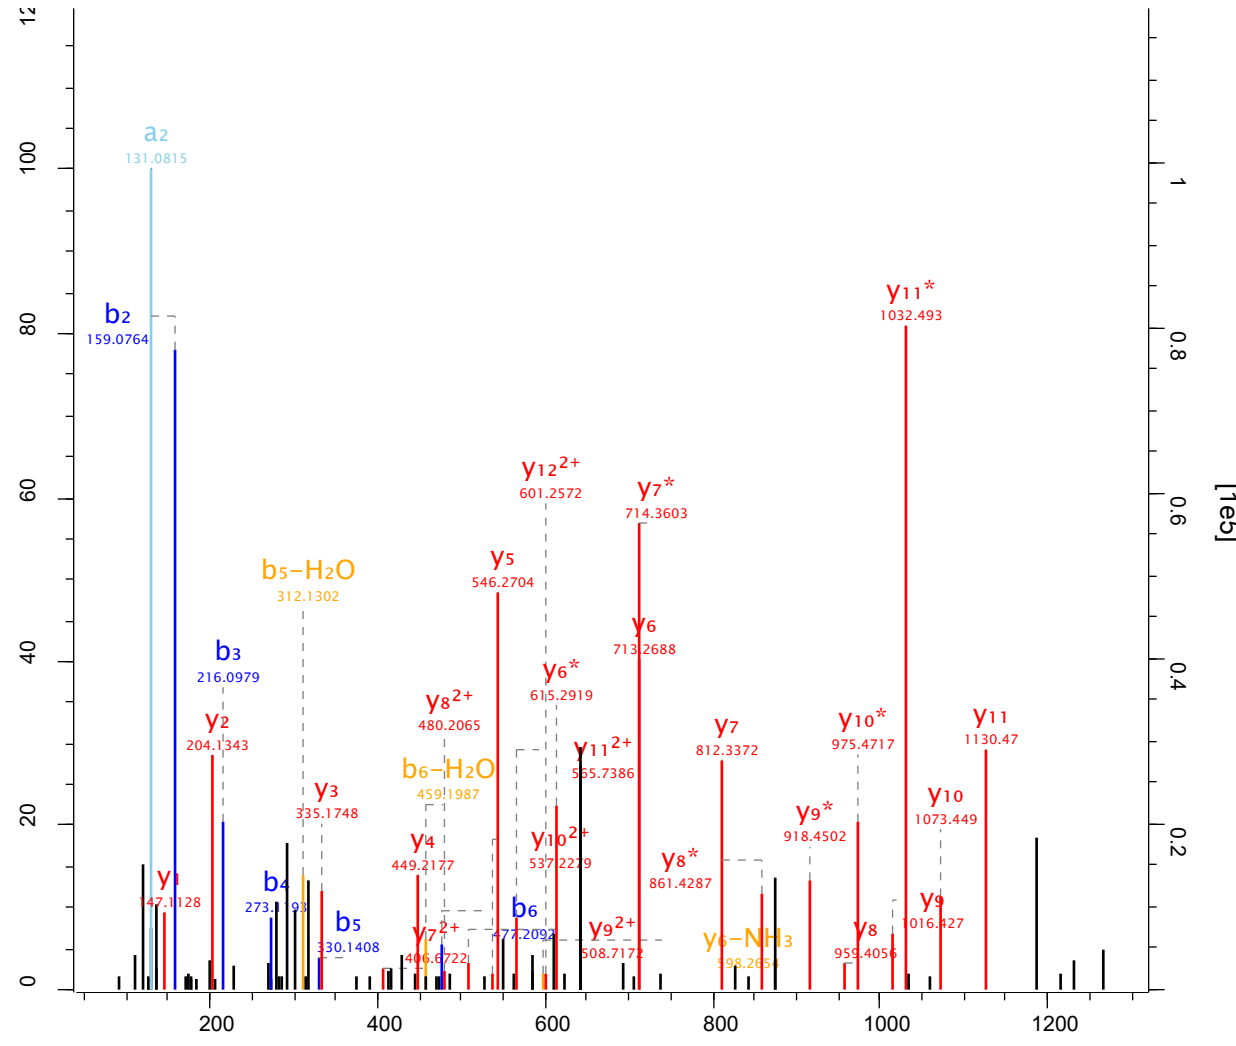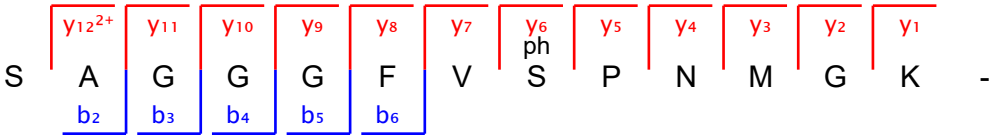

Raw file Scan Method Score m/z  
 sys\_05\_2 17032 FTMS; HCD 186.74 851.35

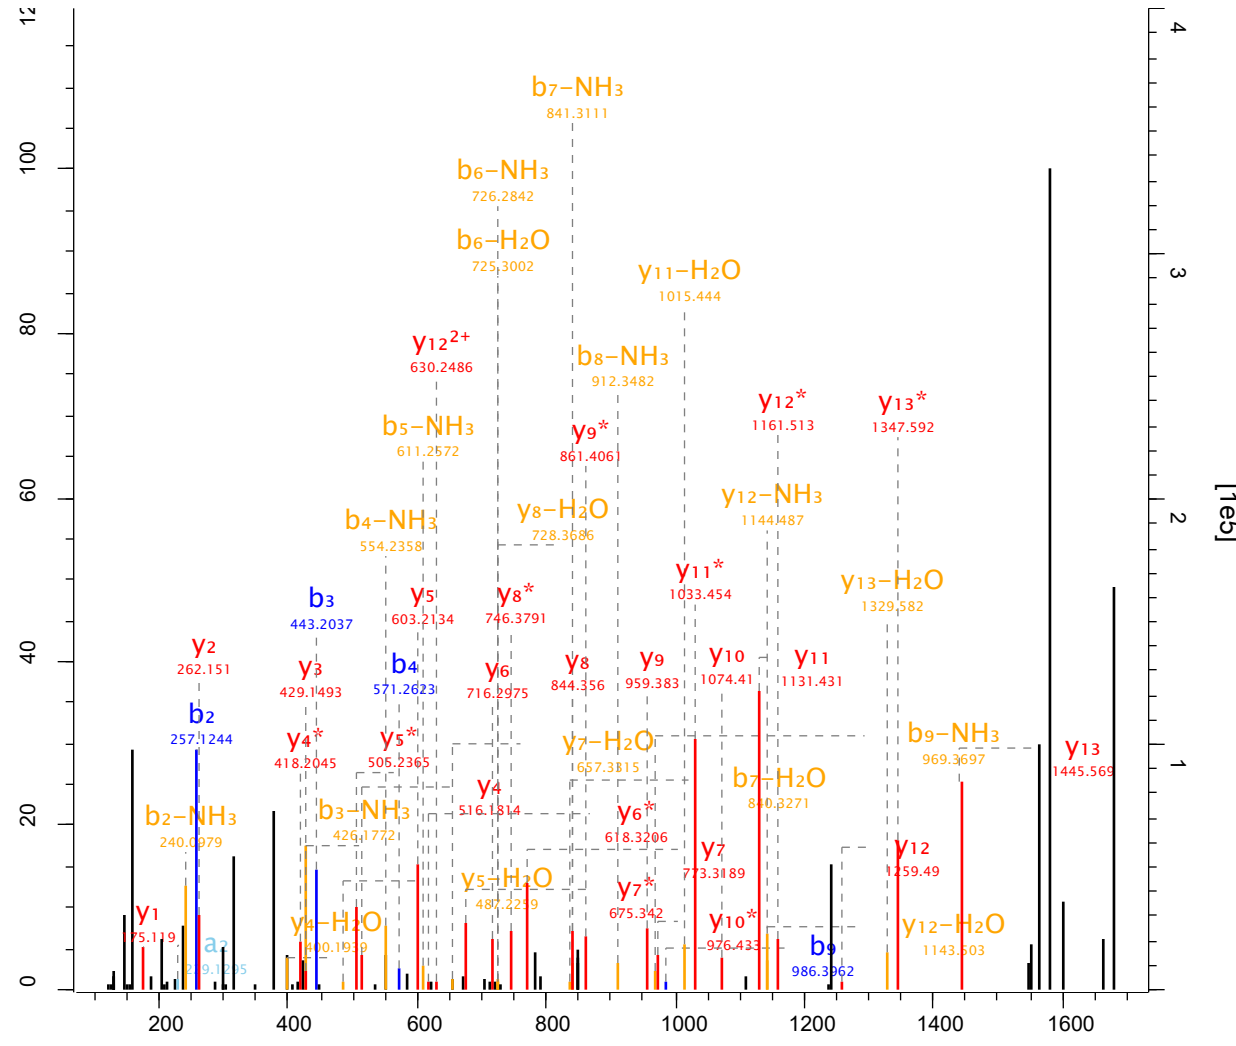

Q Q W Q G D D A G L S S S ph S R  
 b<sub>2</sub> b<sub>3</sub> b<sub>4</sub> b<sub>9</sub>



Raw file Scan Method Score m/z  
 sys\_05\_2 17153 FTMS; HCD 64.82 495.71

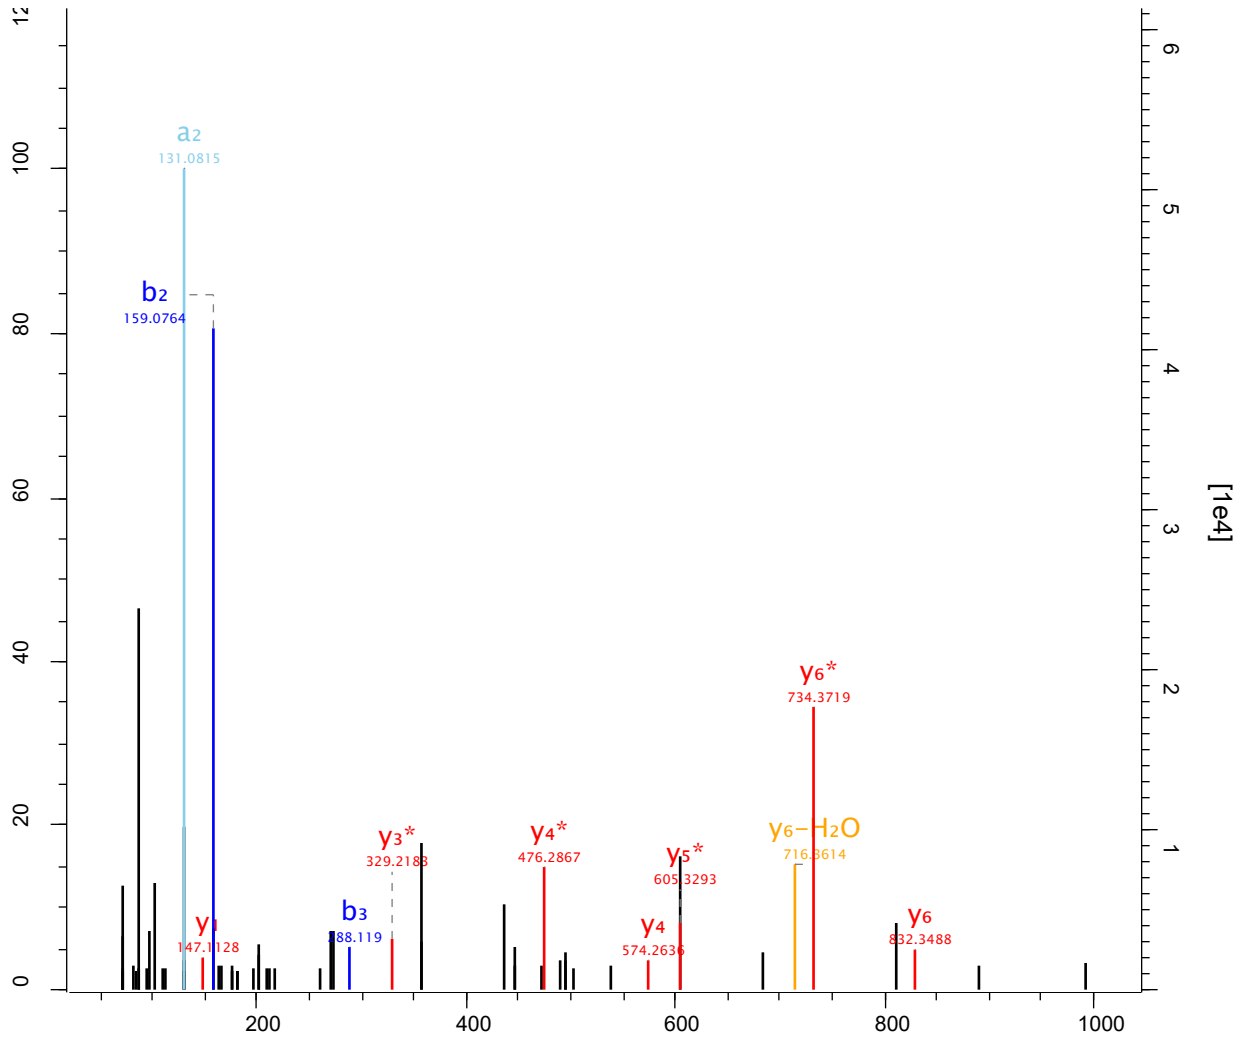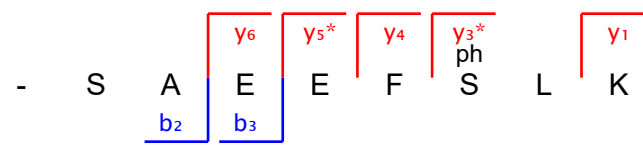

Raw file Scan Method Score m/z  
 sys\_05\_2 17407 FTMS; HCD 115.88 856.4

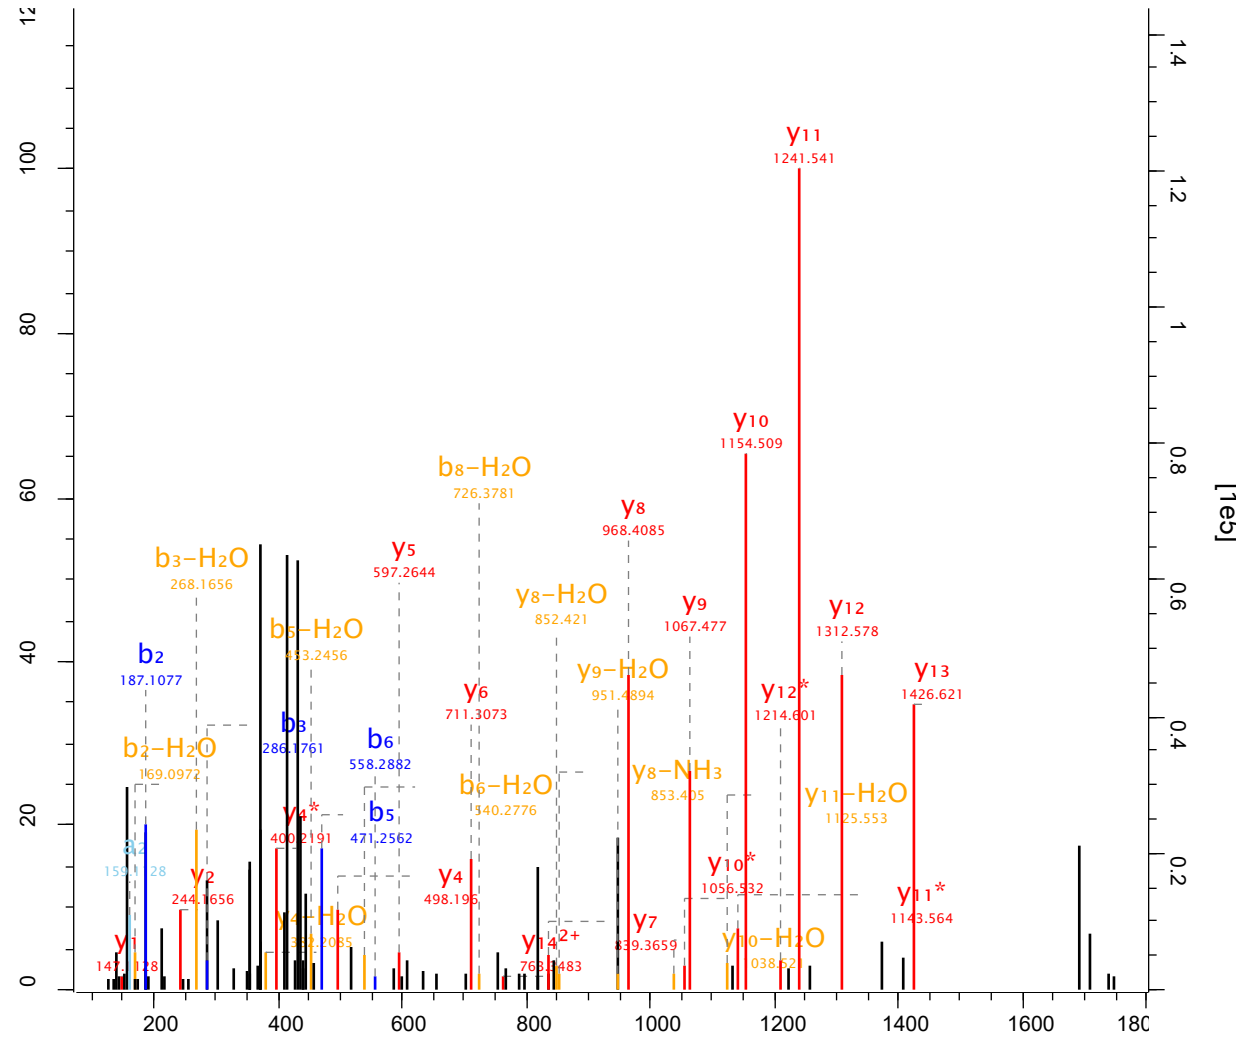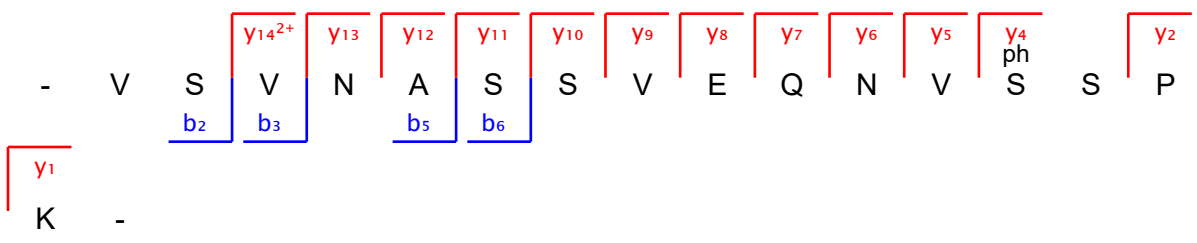

Raw file Scan Method Score m/z  
 sys\_05\_2 17549 FTMS; HCD 163.79 782.84

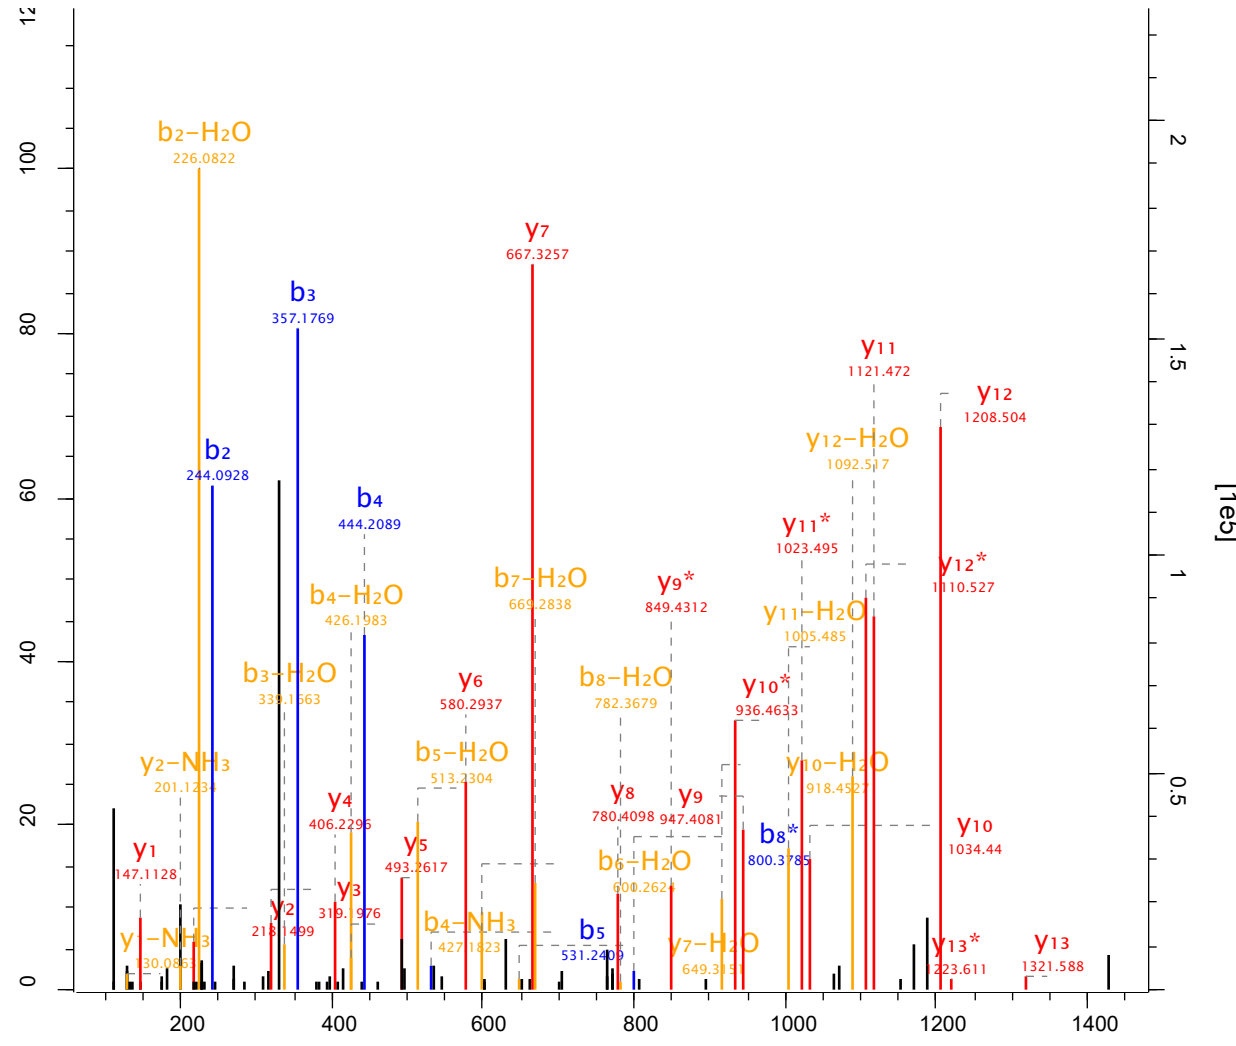

ac S N L S S S S I S S S S T A K

b2 b3 b4 b5 b8\*

Raw file Scan Method Score m/z  
 sys\_05\_2 17614 FTMS; HCD 157.33 503.86

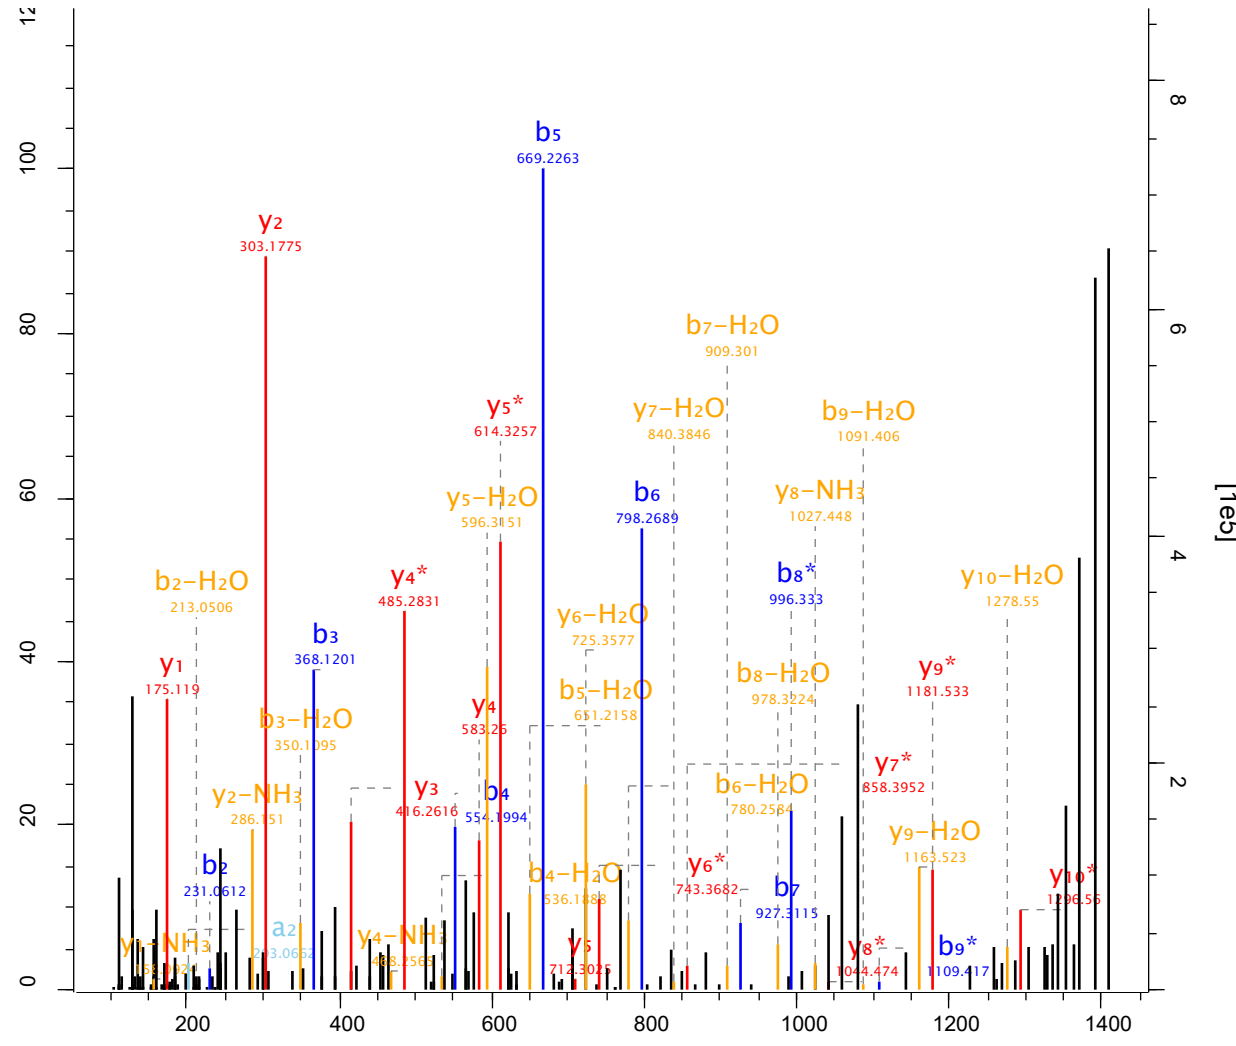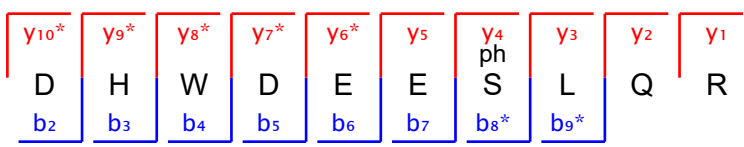

Raw file Scan Method Score m/z  
 sys\_05\_2 17651 FTMS; HCD 171.79 794.35

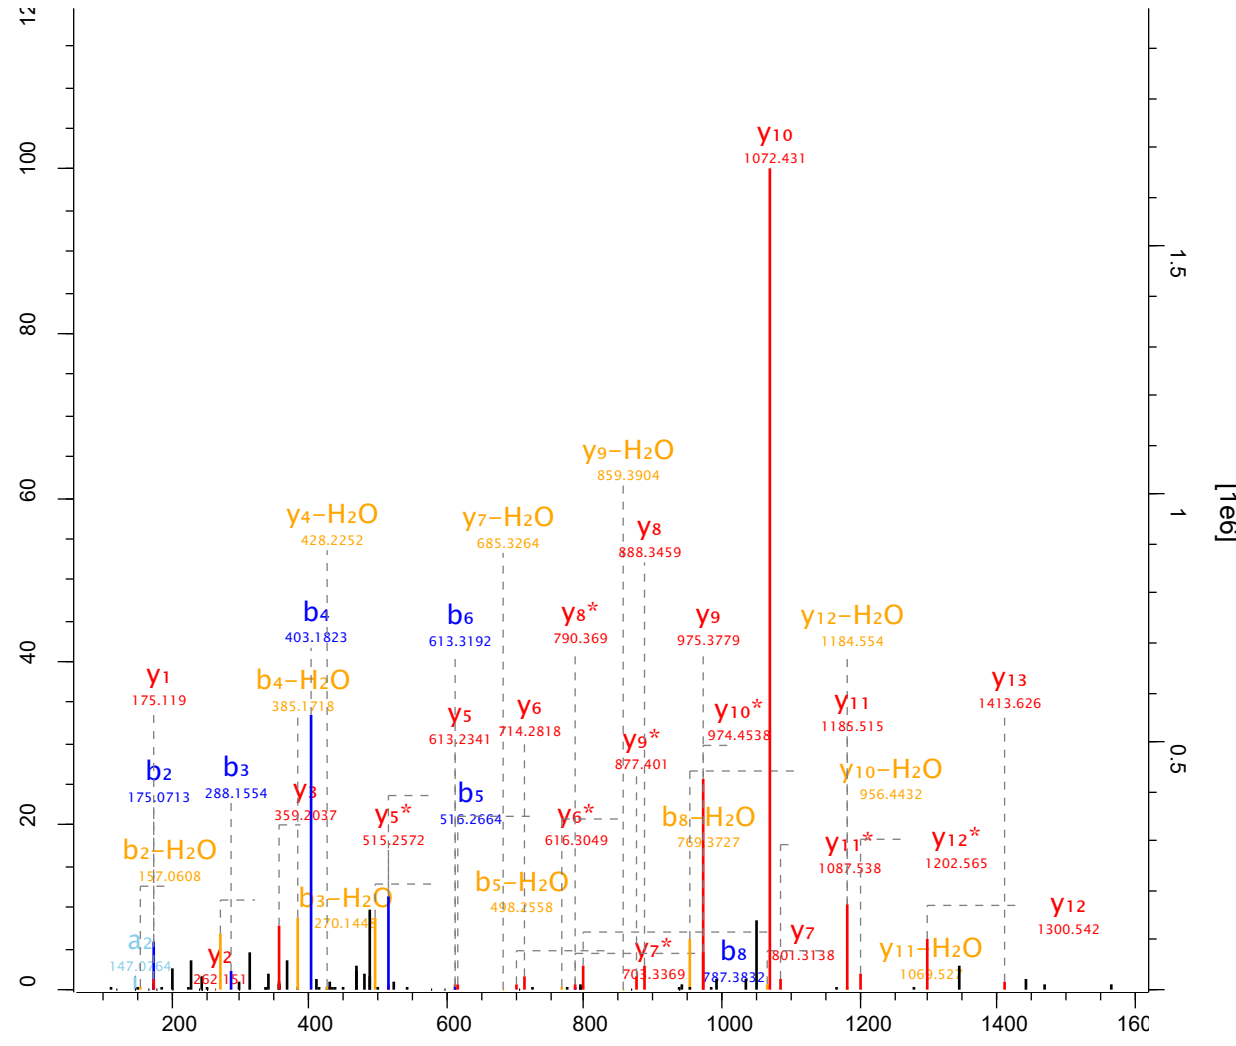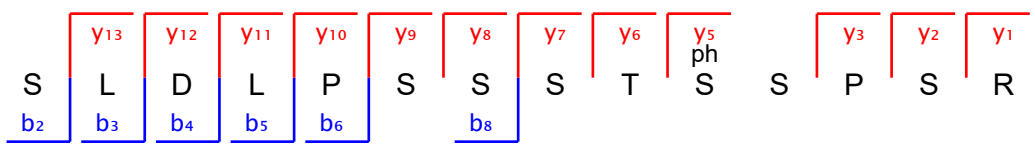

| Raw file | Scan  | Method    | Score | m/z   |
|----------|-------|-----------|-------|-------|
| sys_05_2 | 17727 | FTMS; HCD | 58.08 | 744.8 |

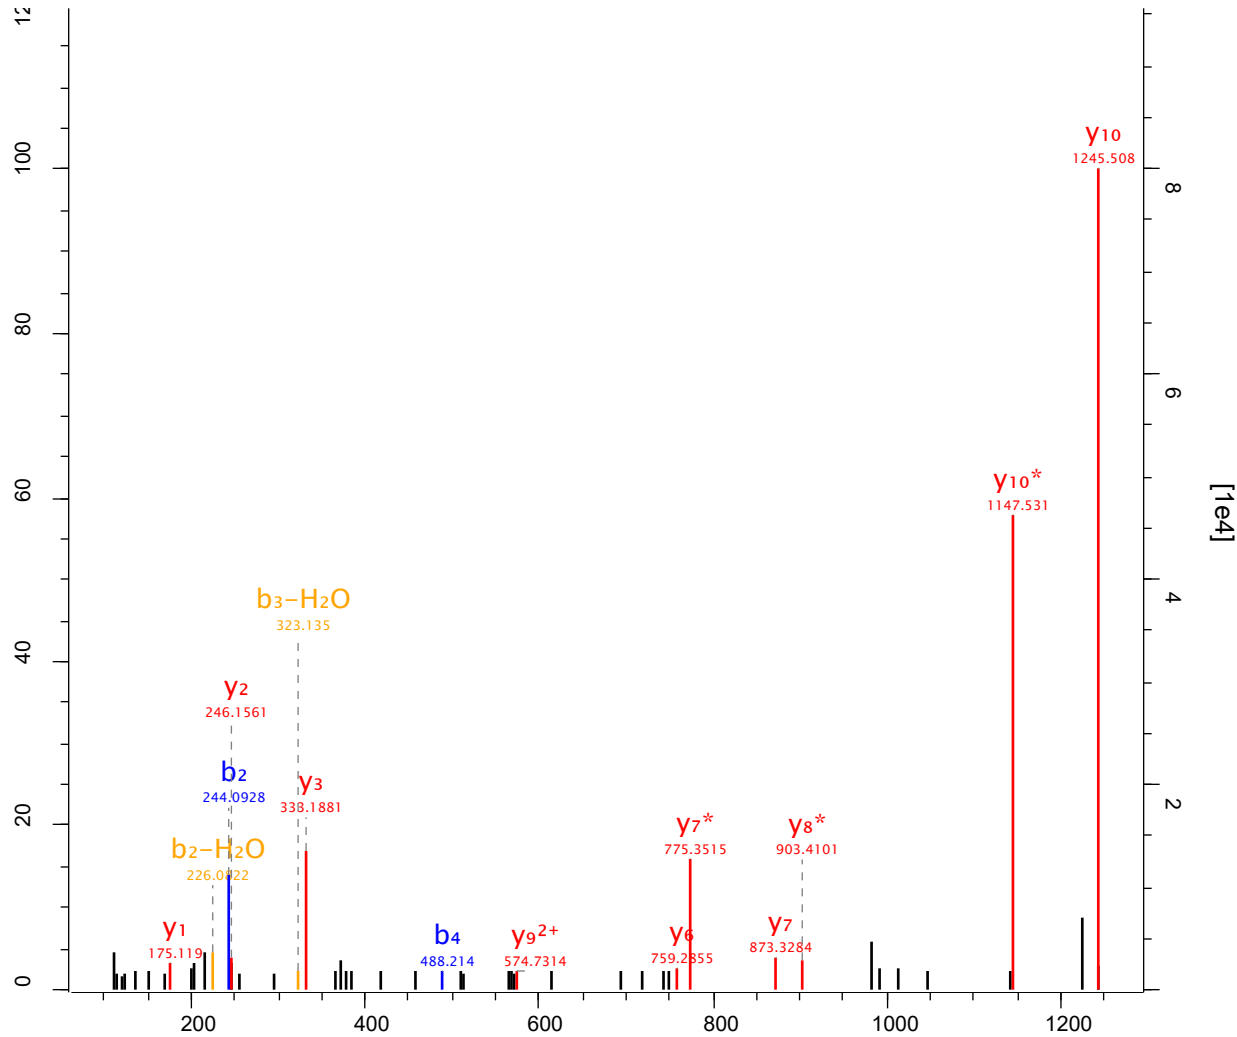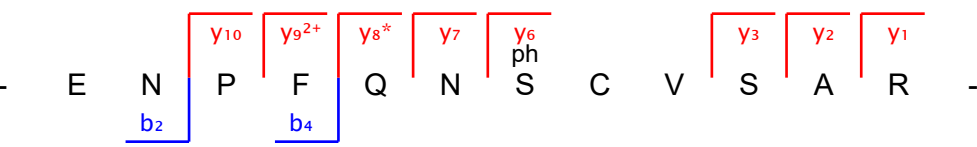

Raw file Scan Method Score m/z  
 sys\_05\_2 18324 FTMS; HCD 129.38 695.34

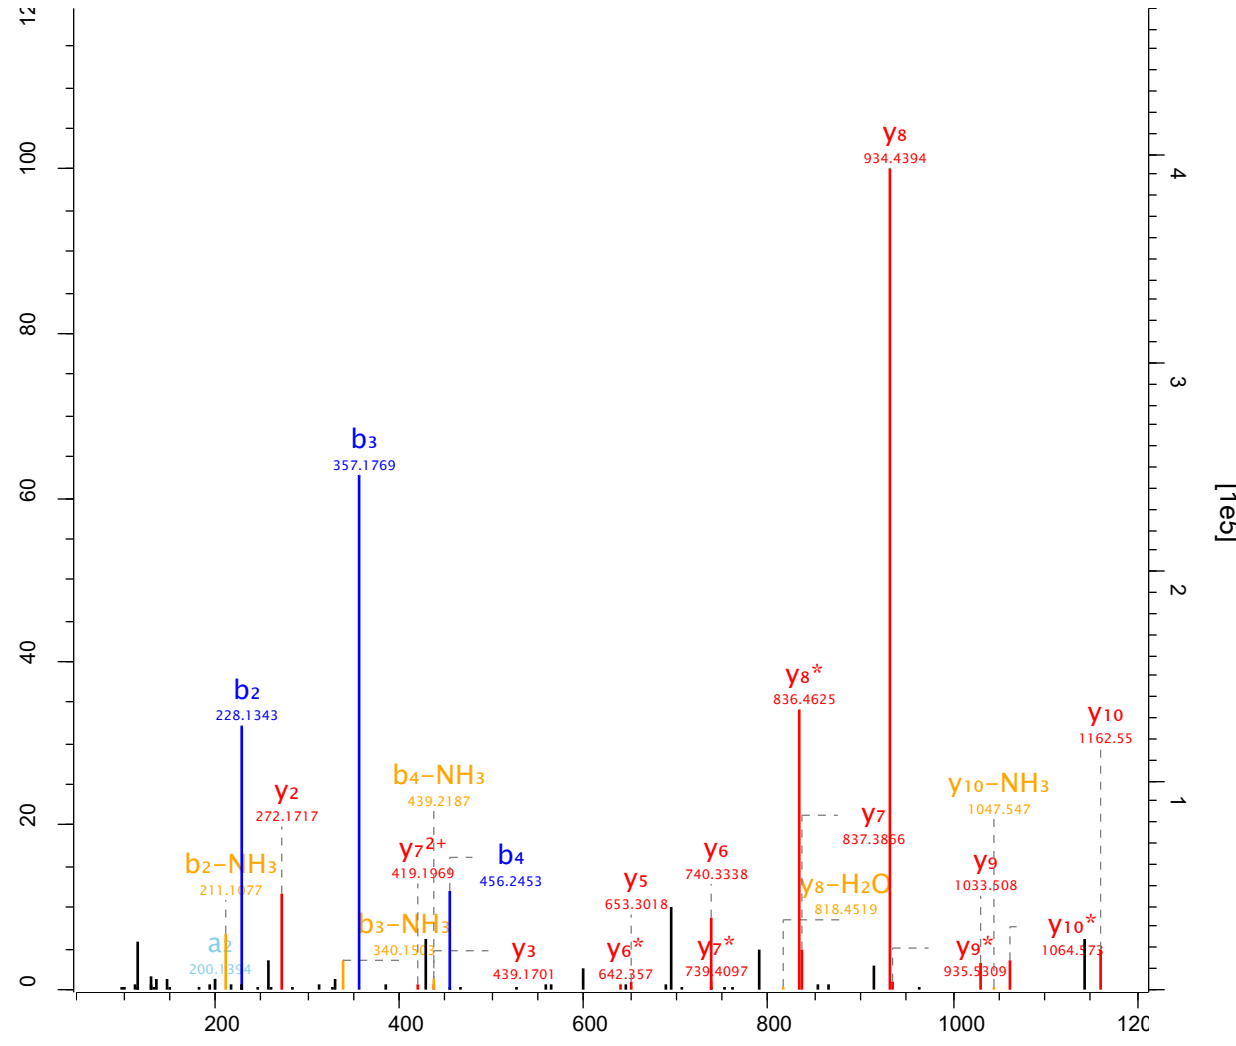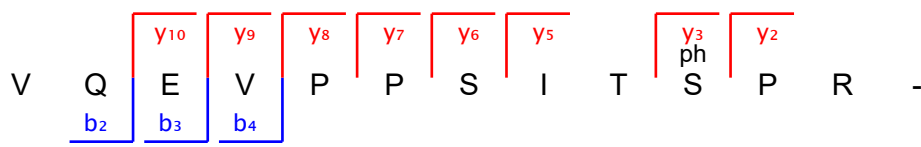

Raw file Scan Method Score m/z  
 sys\_05\_2 18795 FTMS; HCD 213.72 564.76

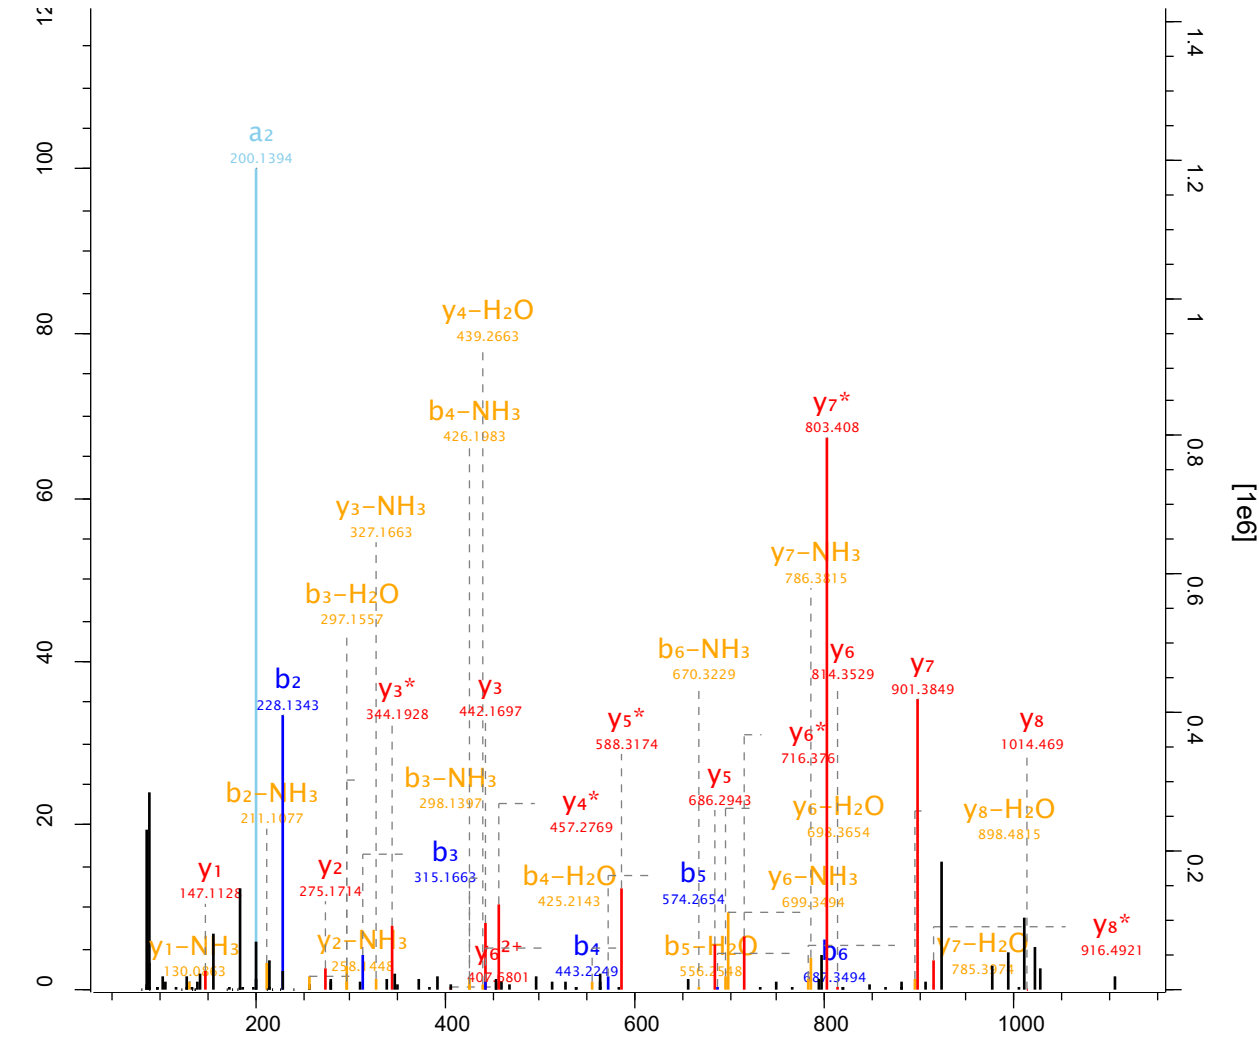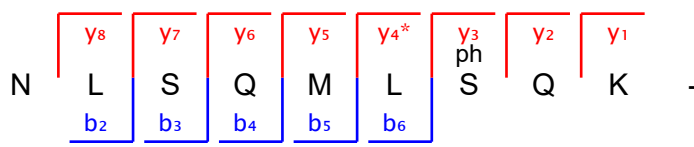



Raw file Scan Method Score m/z  
 sys\_05\_2 18826 FTMS; HCD 128.76 454.52

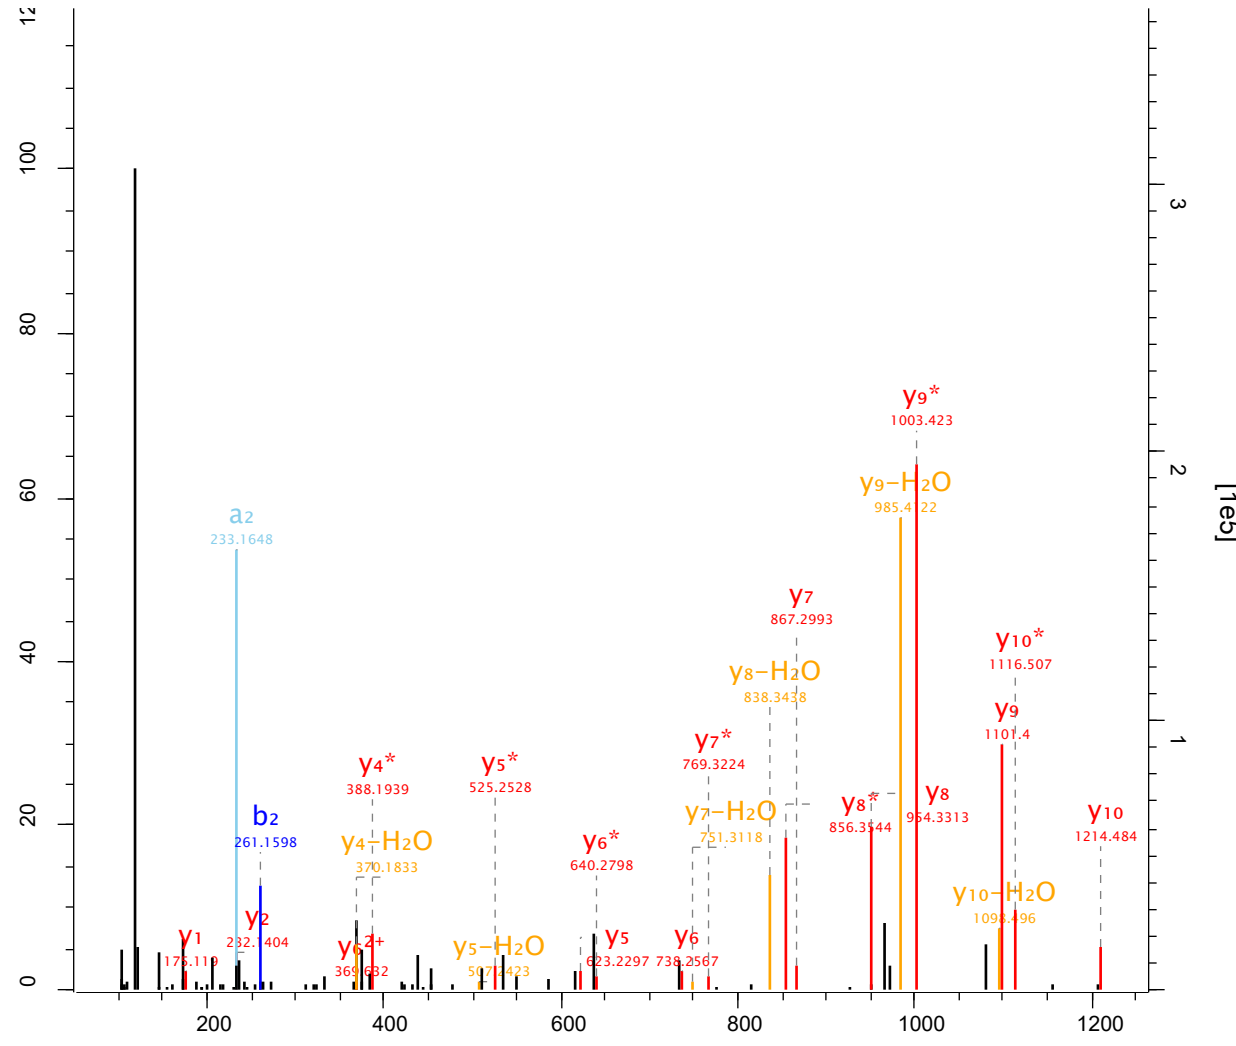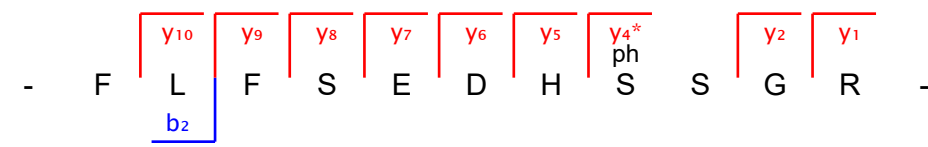

Raw file Scan Method Score m/z  
 sys\_05\_2 19087 FTMS; HCD 55.45 840.87

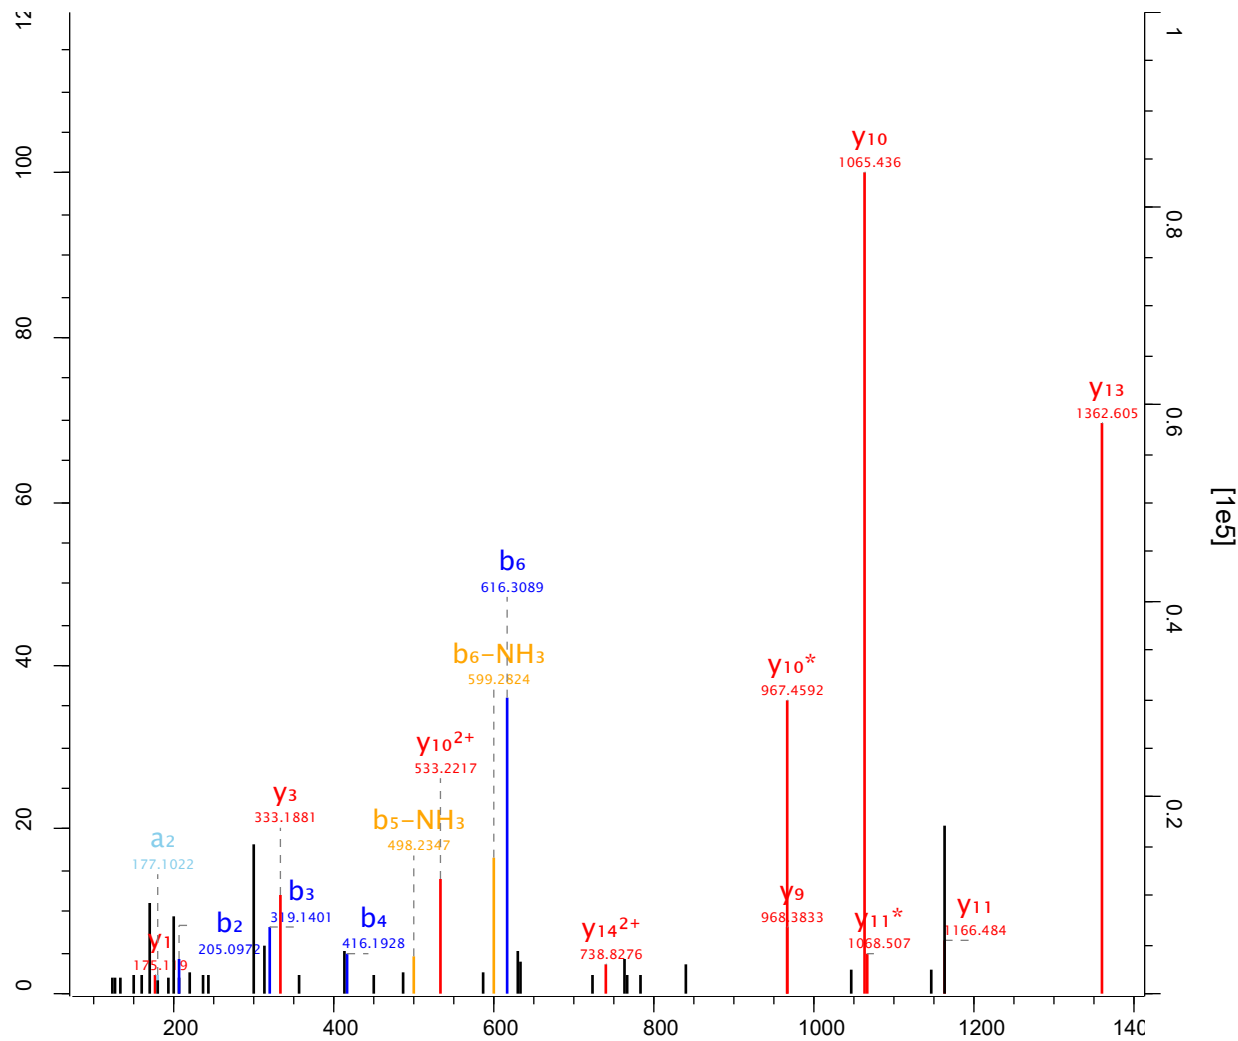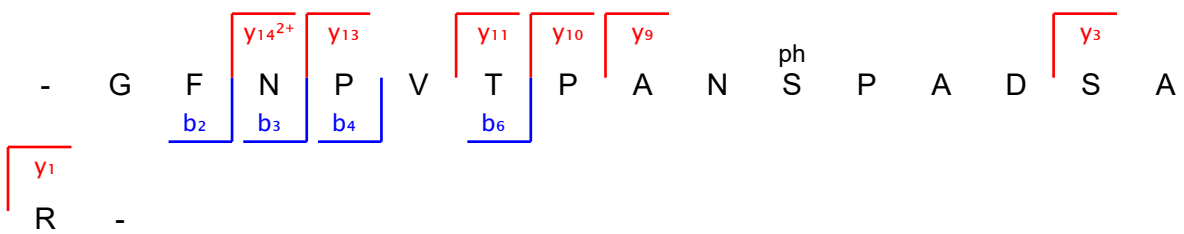

Raw file Scan Method Score m/z  
 sys\_05\_2 19112 FTMS; HCD 97.27 643.3

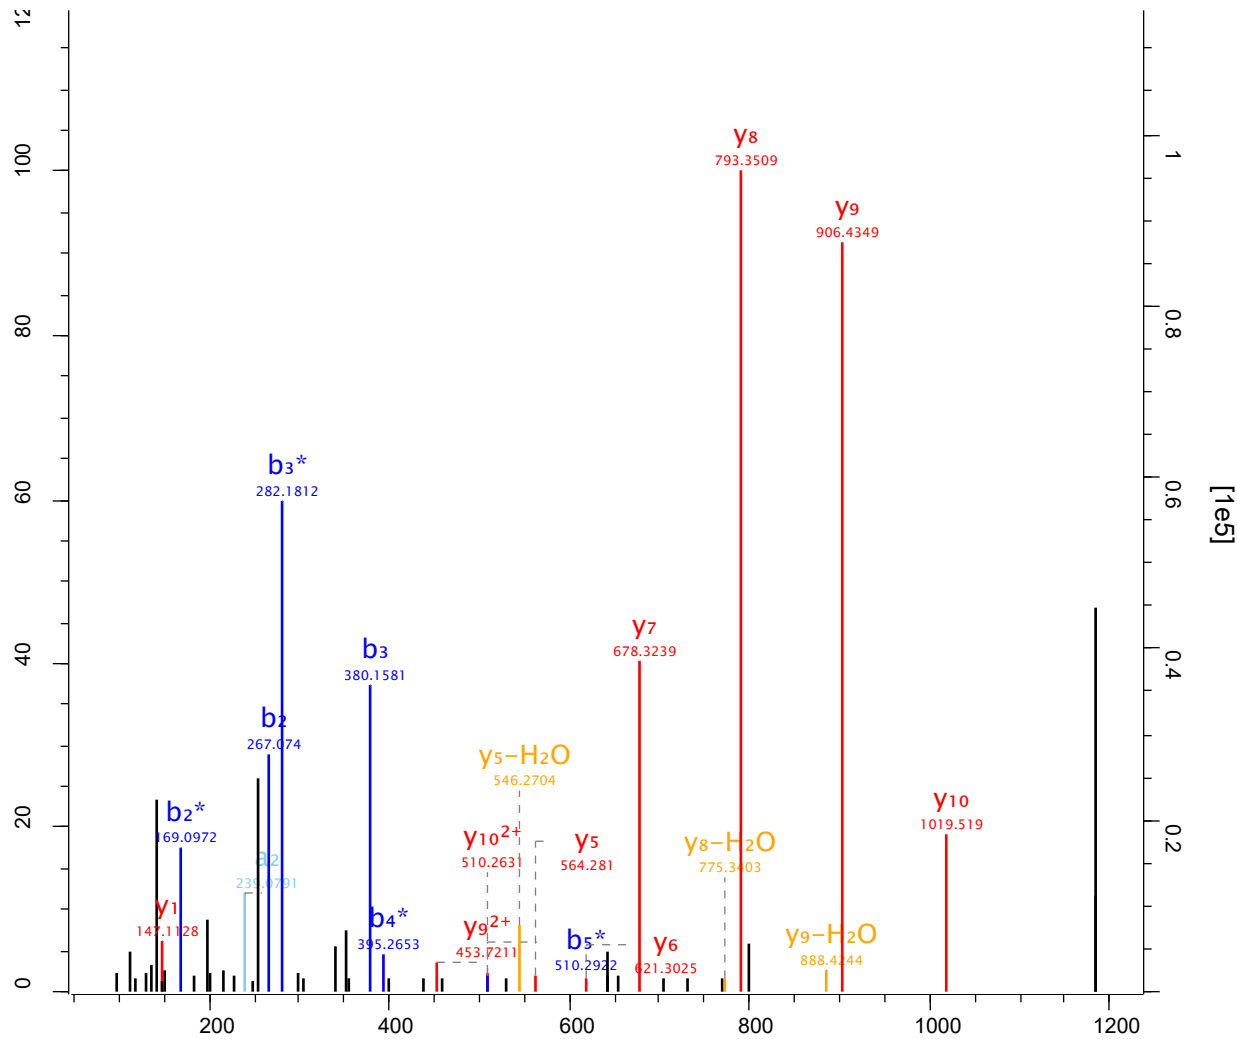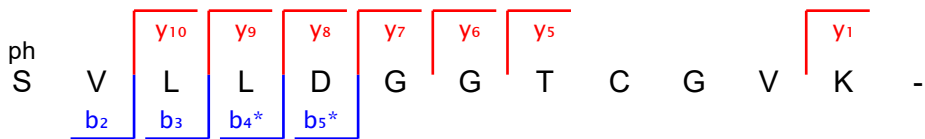

Raw file Scan Method Score m/z  
 sys\_05\_2 19232 FTMS; HCD 135.73 519.2

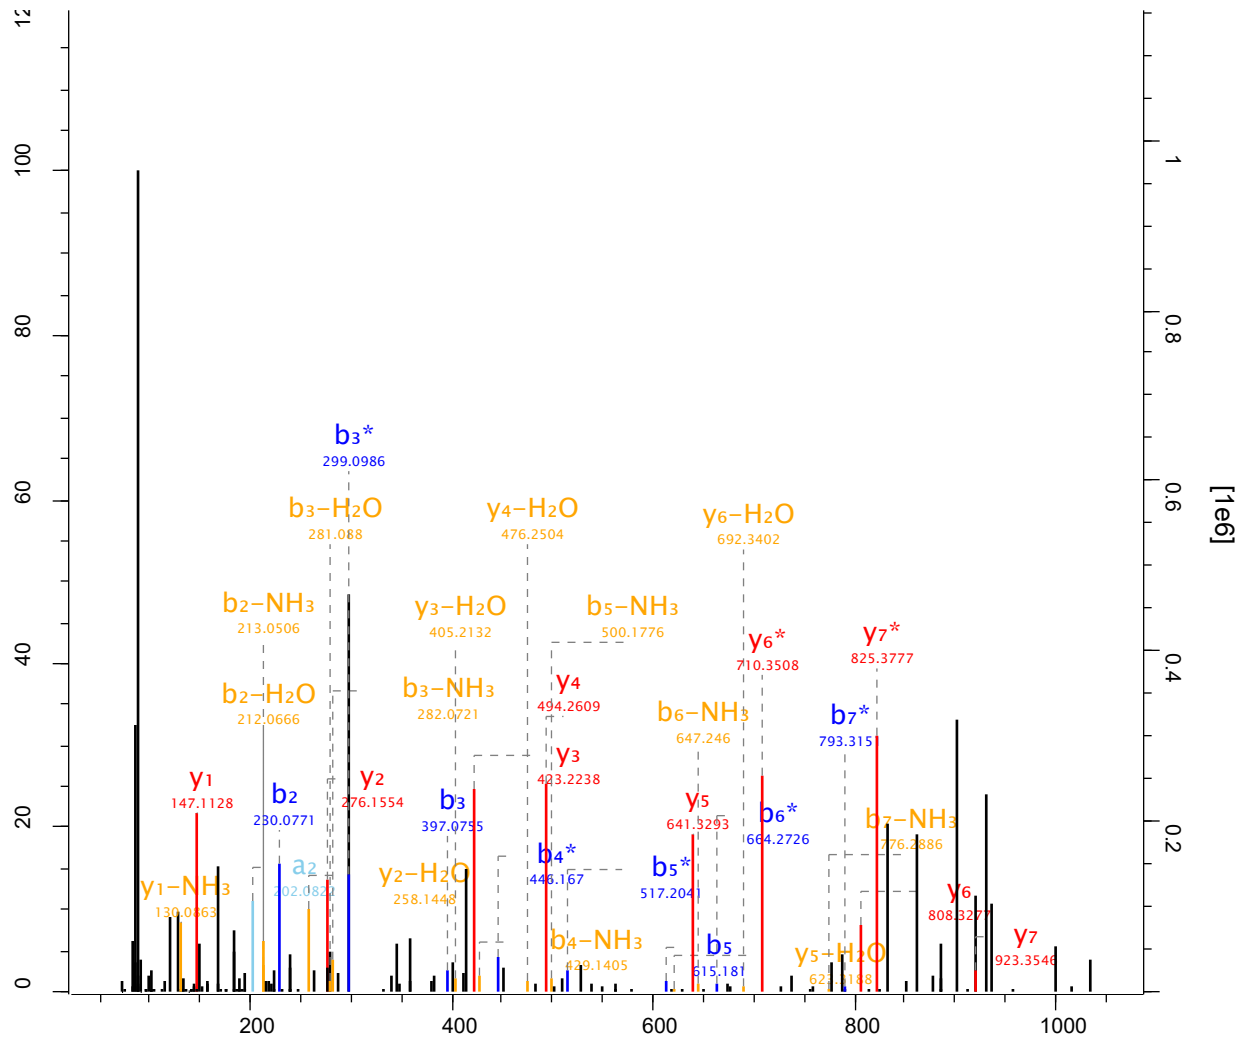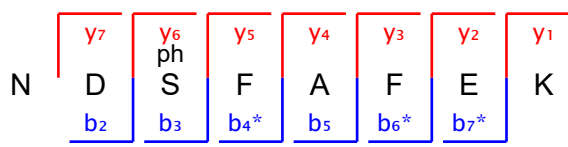



Raw file Scan Method Score m/z  
 sys\_05\_2 19781 FTMS; HCD 110.44 795.85

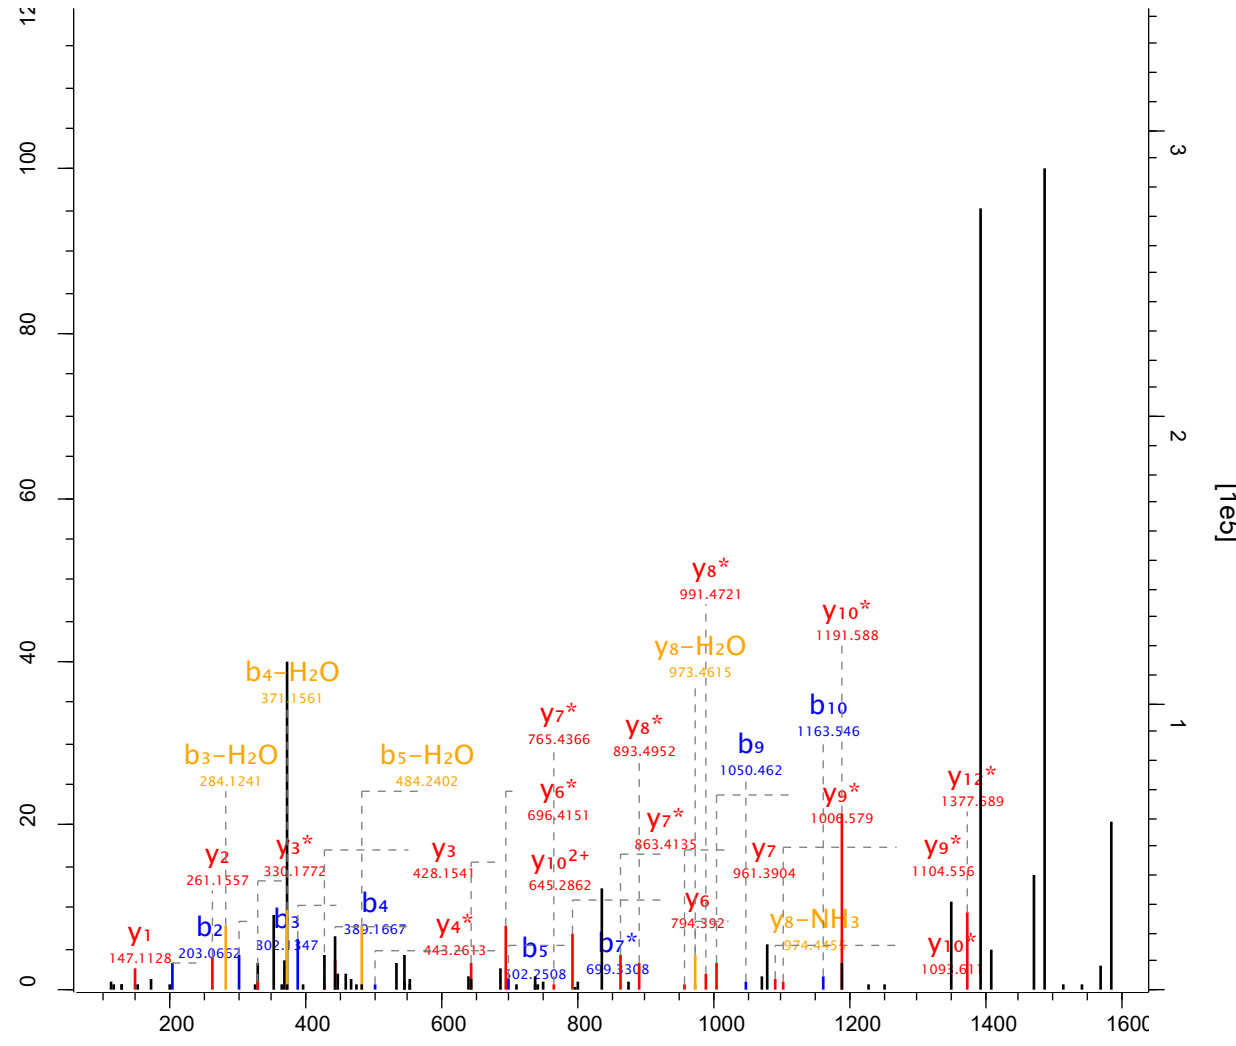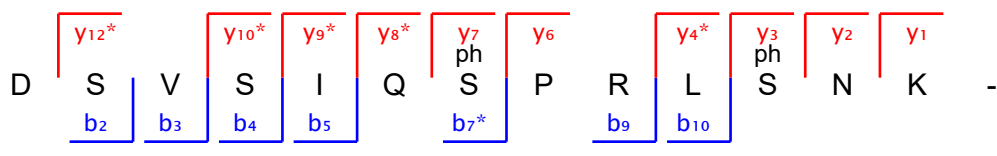

Raw file Scan Method Score m/z  
 sys\_05\_2 20126 FTMS; HCD 202.81 707.84

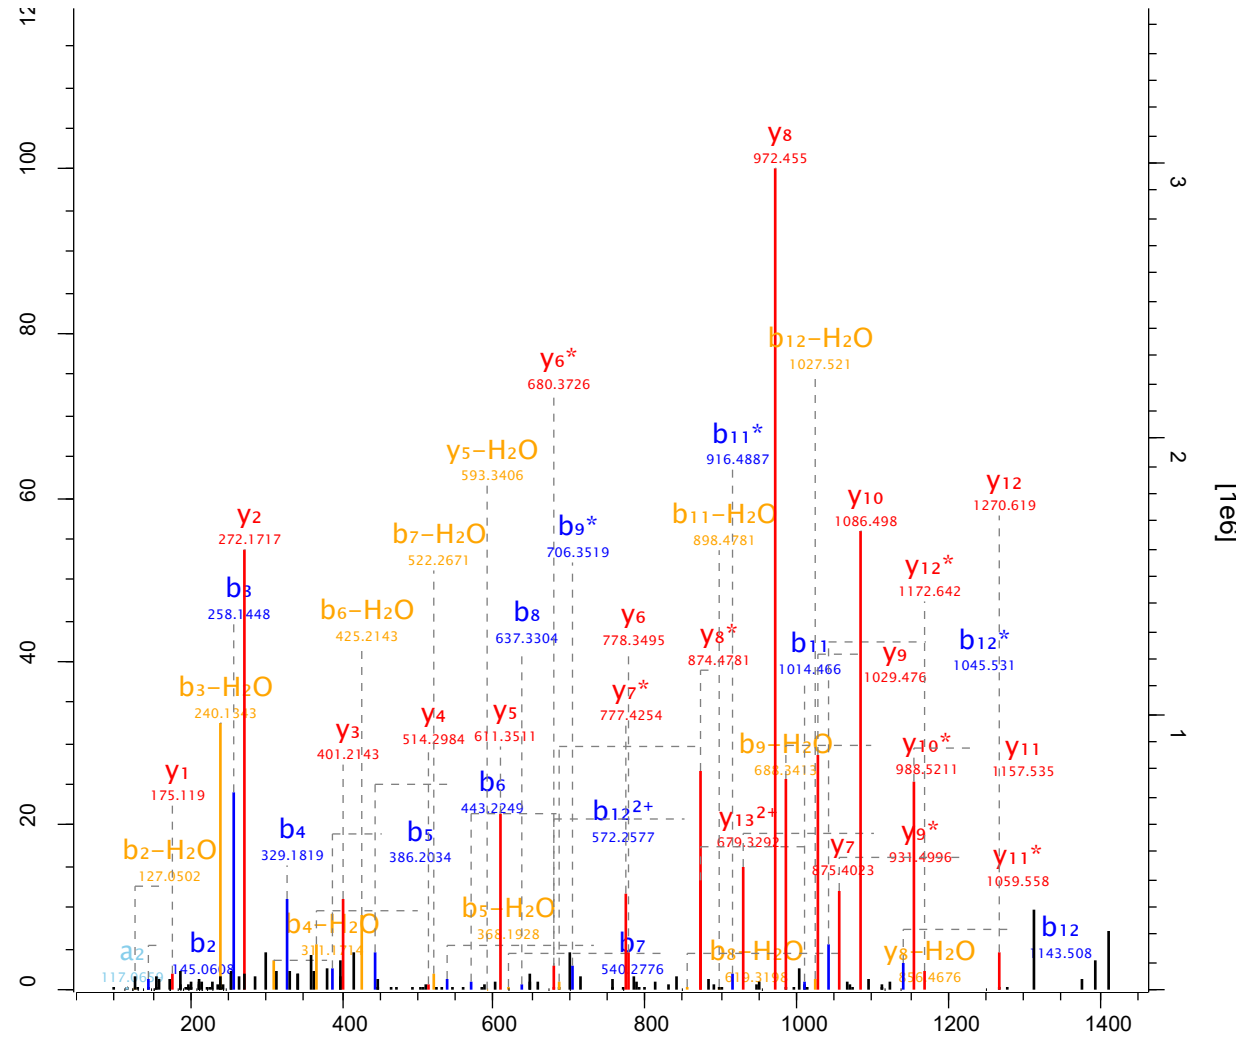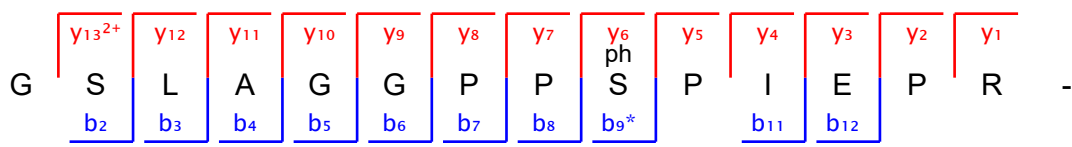

Raw file Scan Method Score m/z  
 sys\_05\_2 20341 FTMS; HCD 86.21 674.29

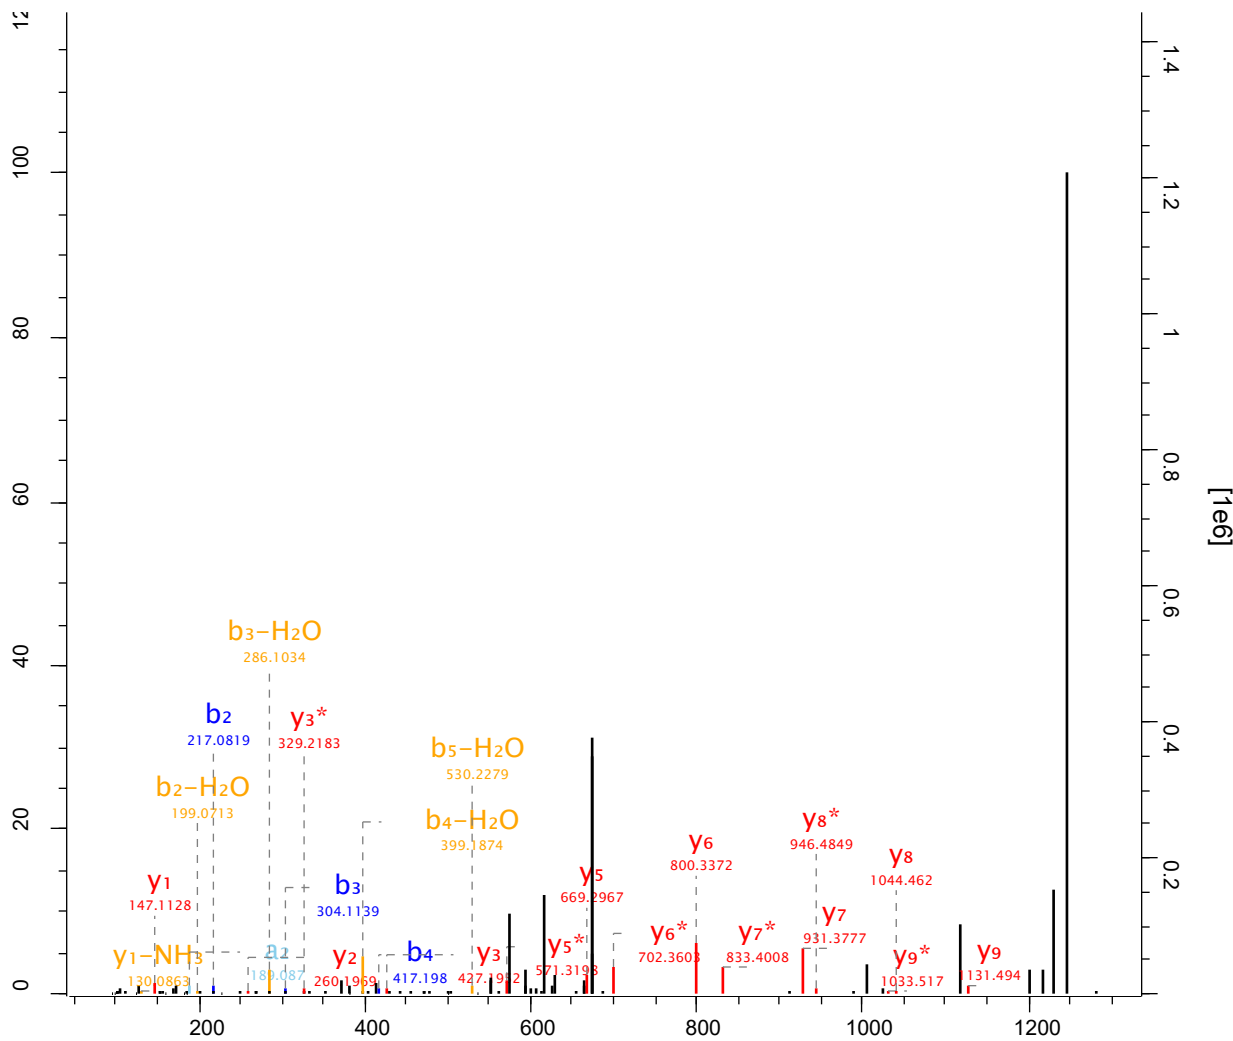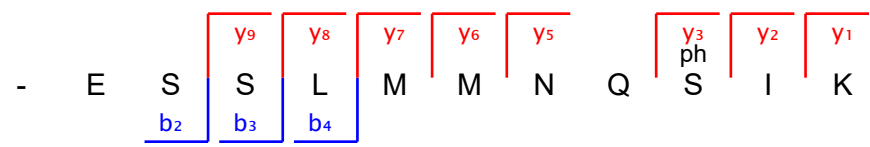



Raw file Scan Method Score m/z  
 sys\_05\_2 20520 FTMS; HCD 93.65 433.23

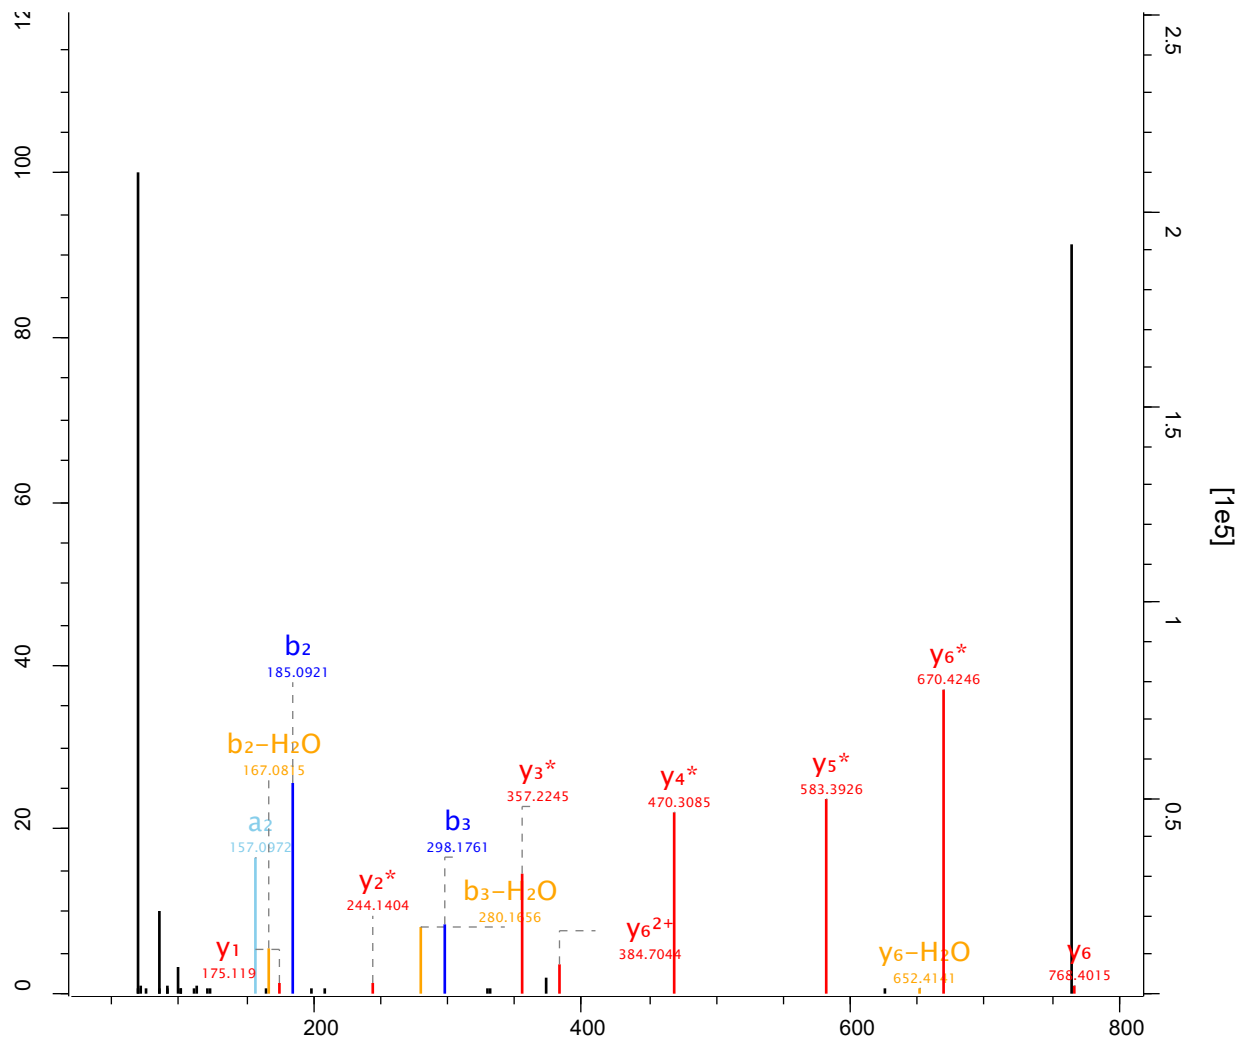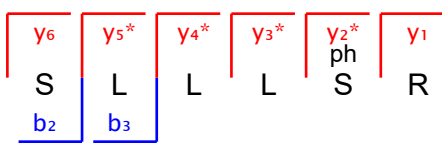

Raw file Scan Method Score m/z  
 sys\_05\_2 20773 FTMS; HCD 199.91 787.34

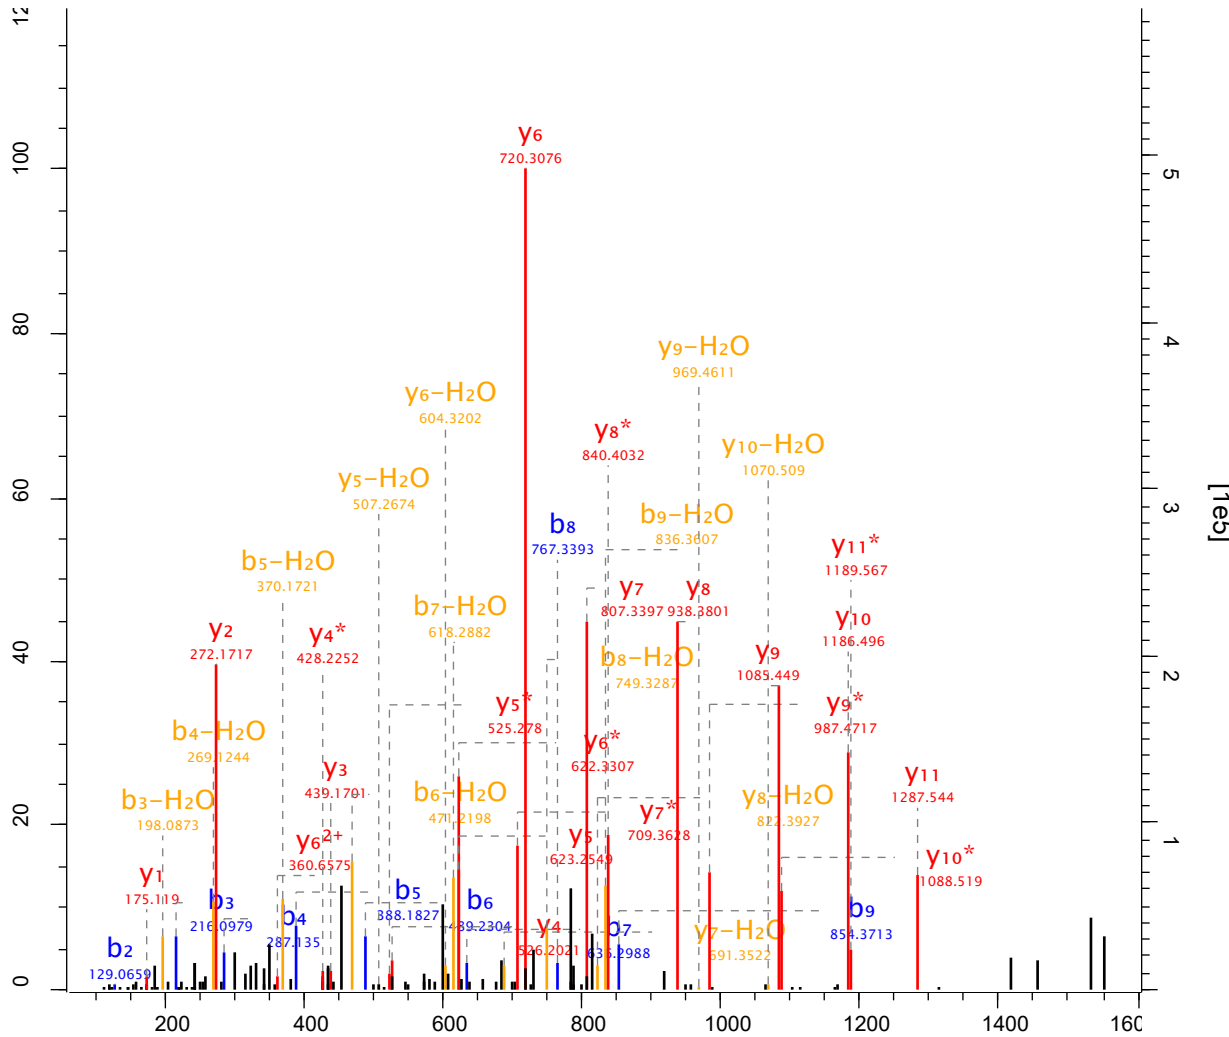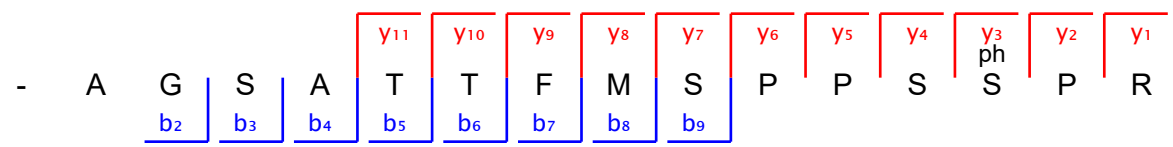

Raw file Scan Method Score m/z  
 sys\_05\_2 20939 FTMS; HCD 181.11 889.72

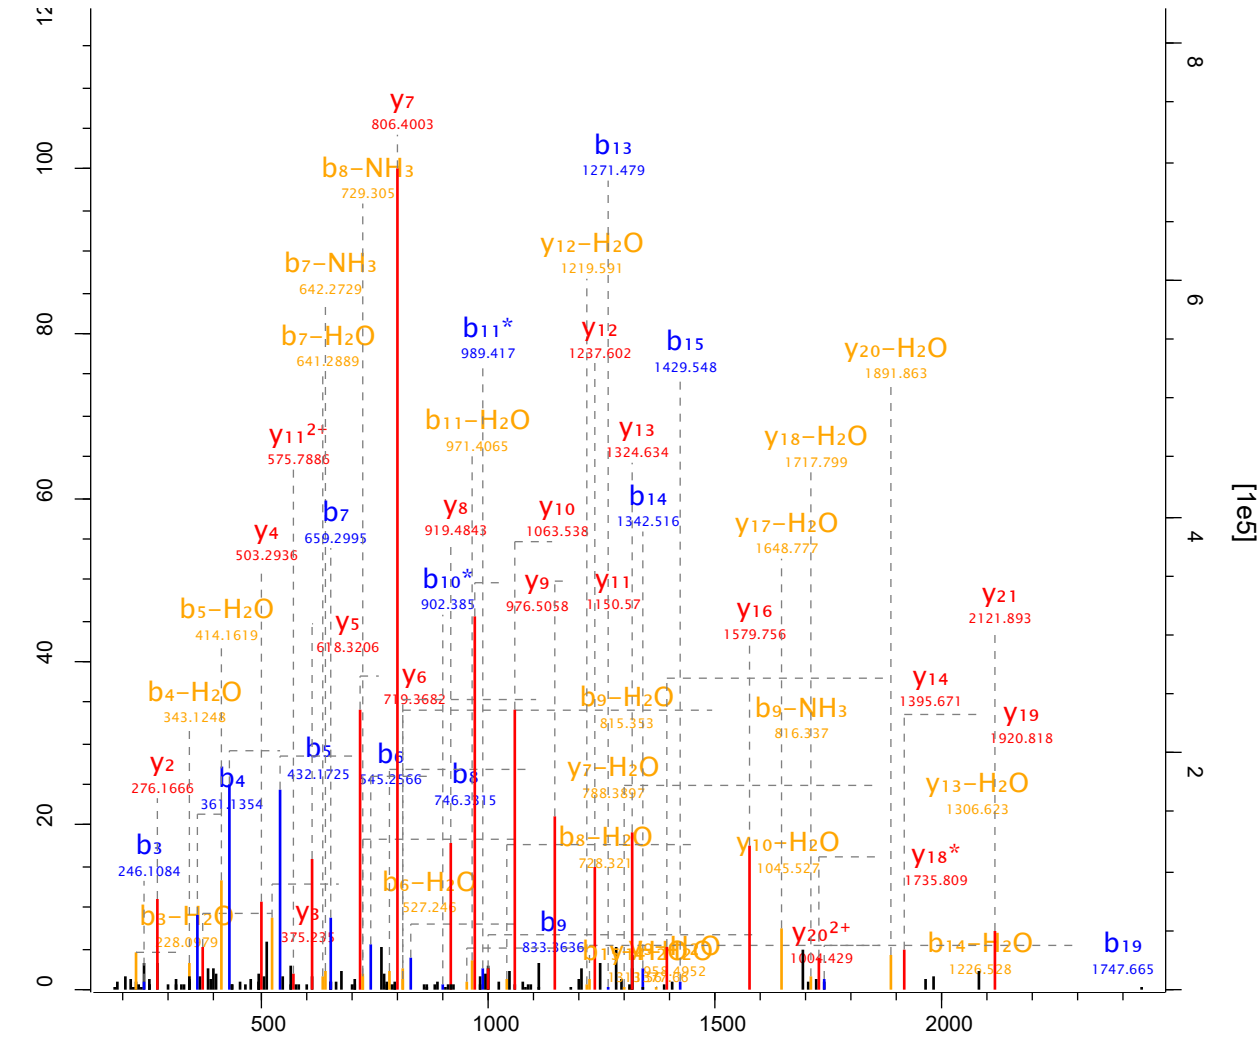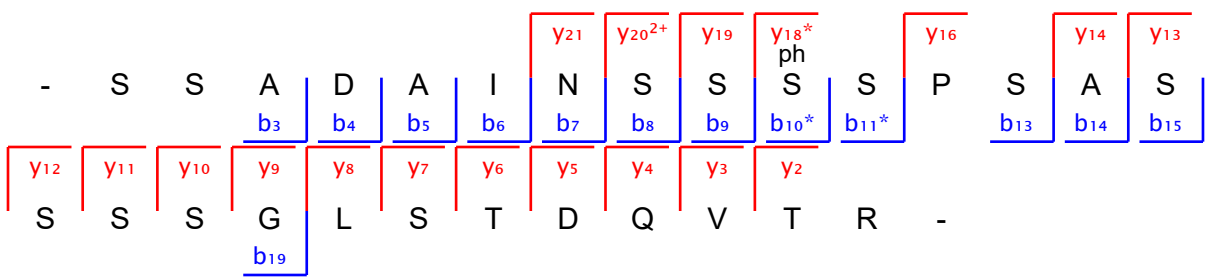

Raw file Scan Method Score m/z  
 sys\_05\_2 21084 FTMS; HCD 138.91 777.82

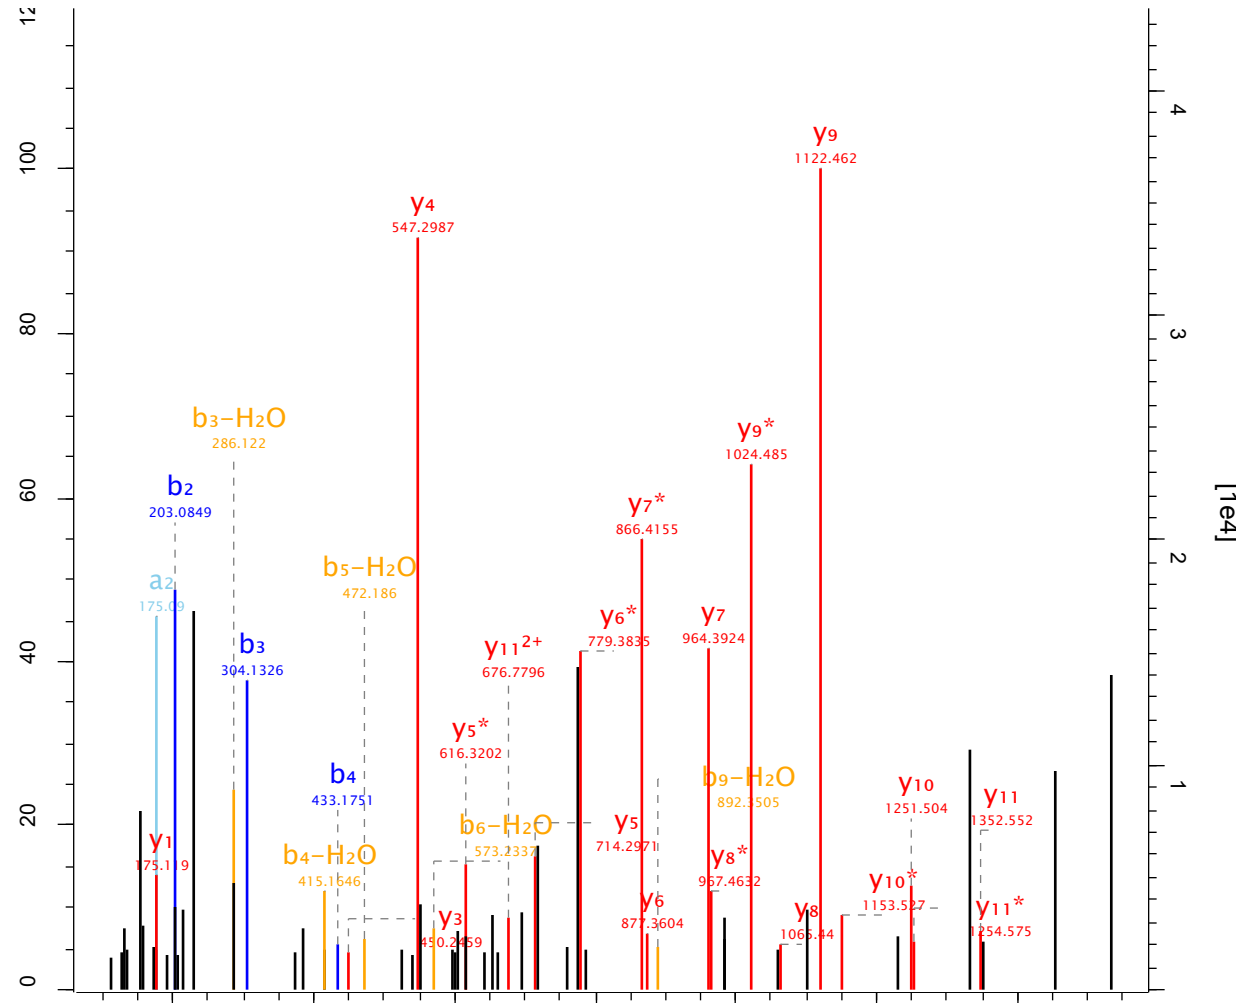

- M A T E G T S Y S P F Q R -

b<sub>2</sub>
b<sub>3</sub>
b<sub>4</sub>
y<sub>11</sub>
y<sub>10</sub>
y<sub>9</sub>
y<sub>8</sub>
y<sub>7</sub>
y<sub>6</sub>
y<sub>5</sub><sup>ph</sup>
y<sub>4</sub>
y<sub>3</sub>
y<sub>1</sub>

Raw file Scan Method Score m/z  
 sys\_05\_2 21250 FTMS; HCD 298 857.86

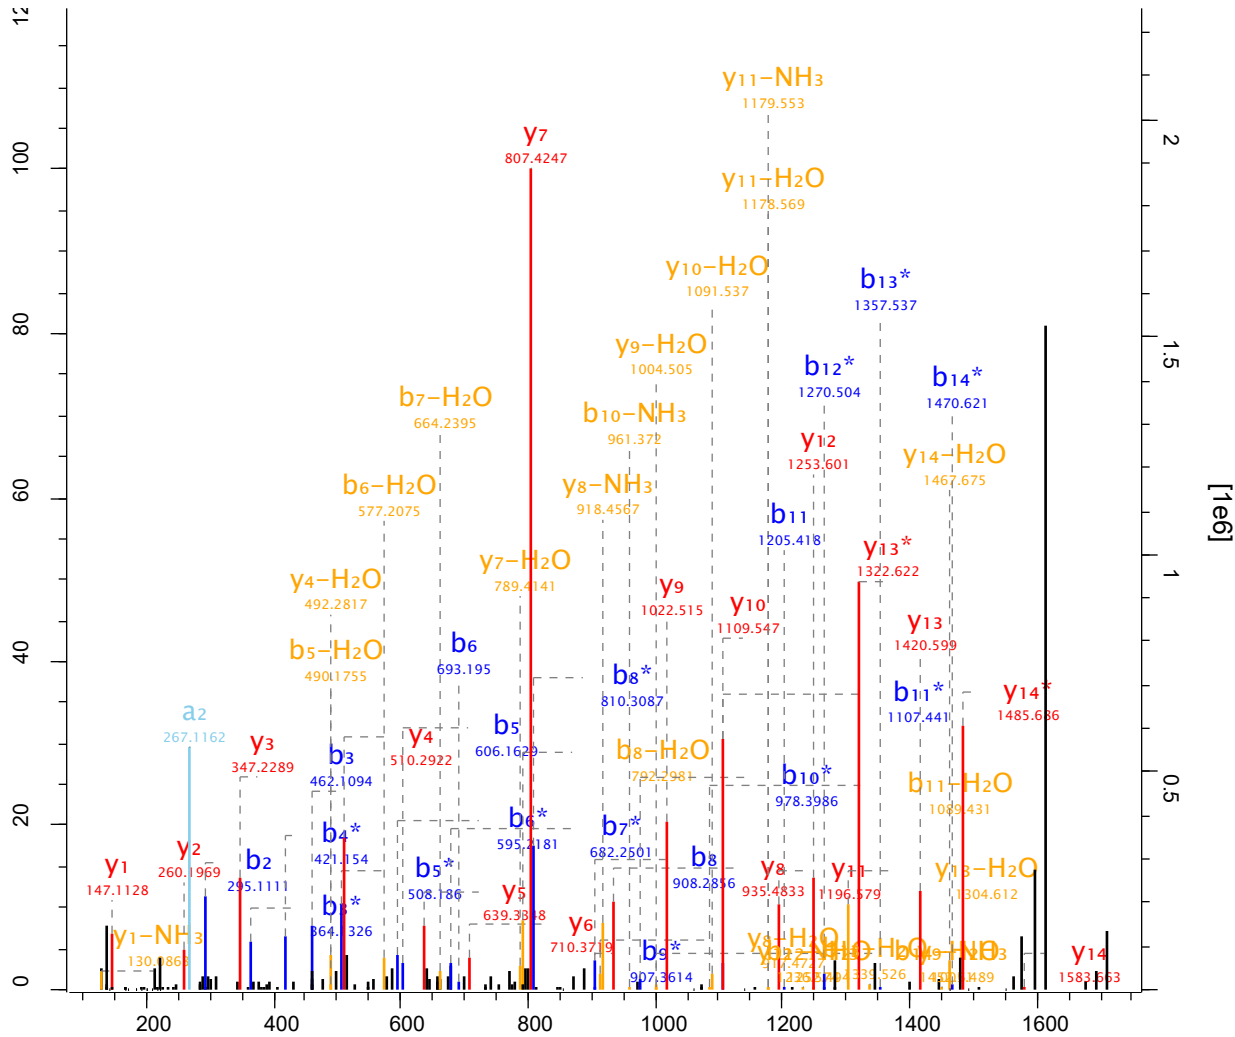

|   |     |           |     |     |     |     |    |     |      |     |      |      |      |    |
|---|-----|-----------|-----|-----|-----|-----|----|-----|------|-----|------|------|------|----|
|   | Y14 | Y13<br>ph | Y12 | Y11 | Y10 | Y9  | Y8 | Y7  | Y6   | Y5  | Y4   | Y3   | Y2   | Y1 |
| M | Y   | S         | G   | S   | S   | S   | Q  | P   | A    | E   | Y    | S    | L    | K  |
|   | b2  | b3        | b4* | b5  | b6  | b7* | b8 | b9* | b10* | b11 | b12* | b13* | b14* |    |



Raw file Scan Method Score m/z  
 sys\_05\_2 21658 FTMS; HCD 112.34 768.31

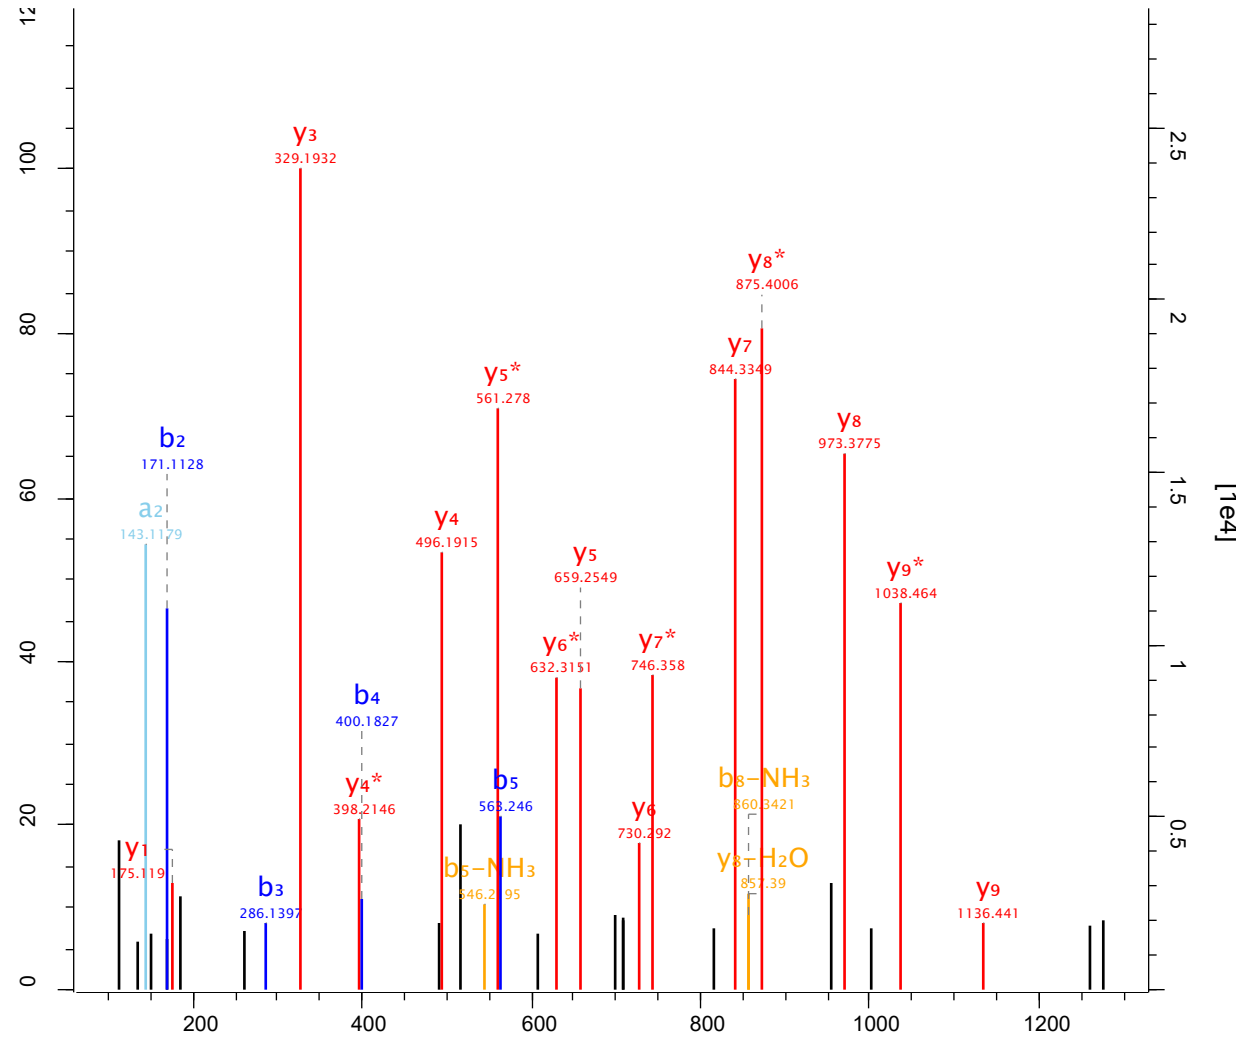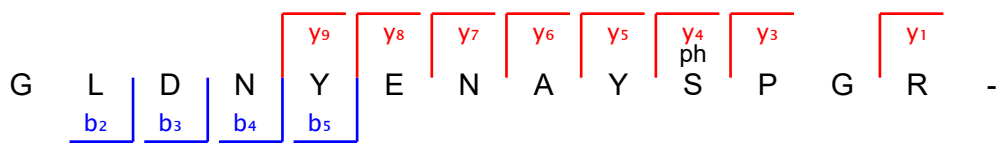

Raw file Scan Method Score m/z  
 sys\_05\_2 21695 FTMS; HCD 49.19 617.27

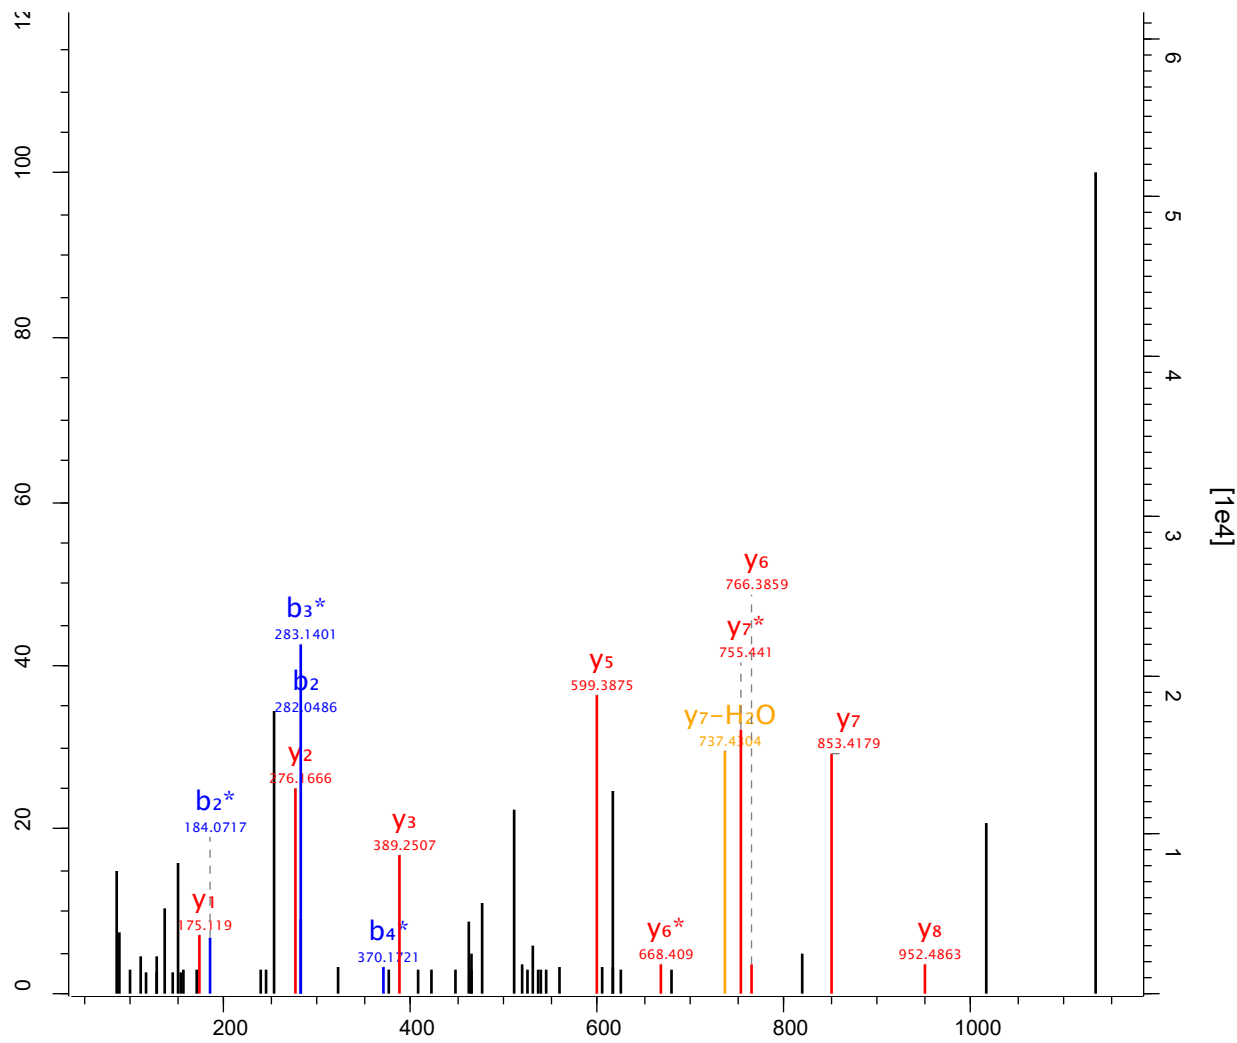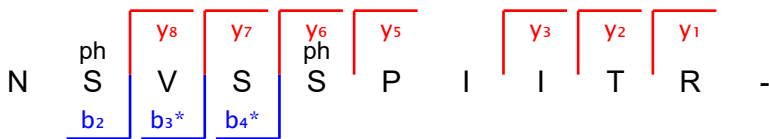



Raw file Scan Method Score m/z  
 sys\_05\_2 21873 FTMS; HCD 136.66 804.86

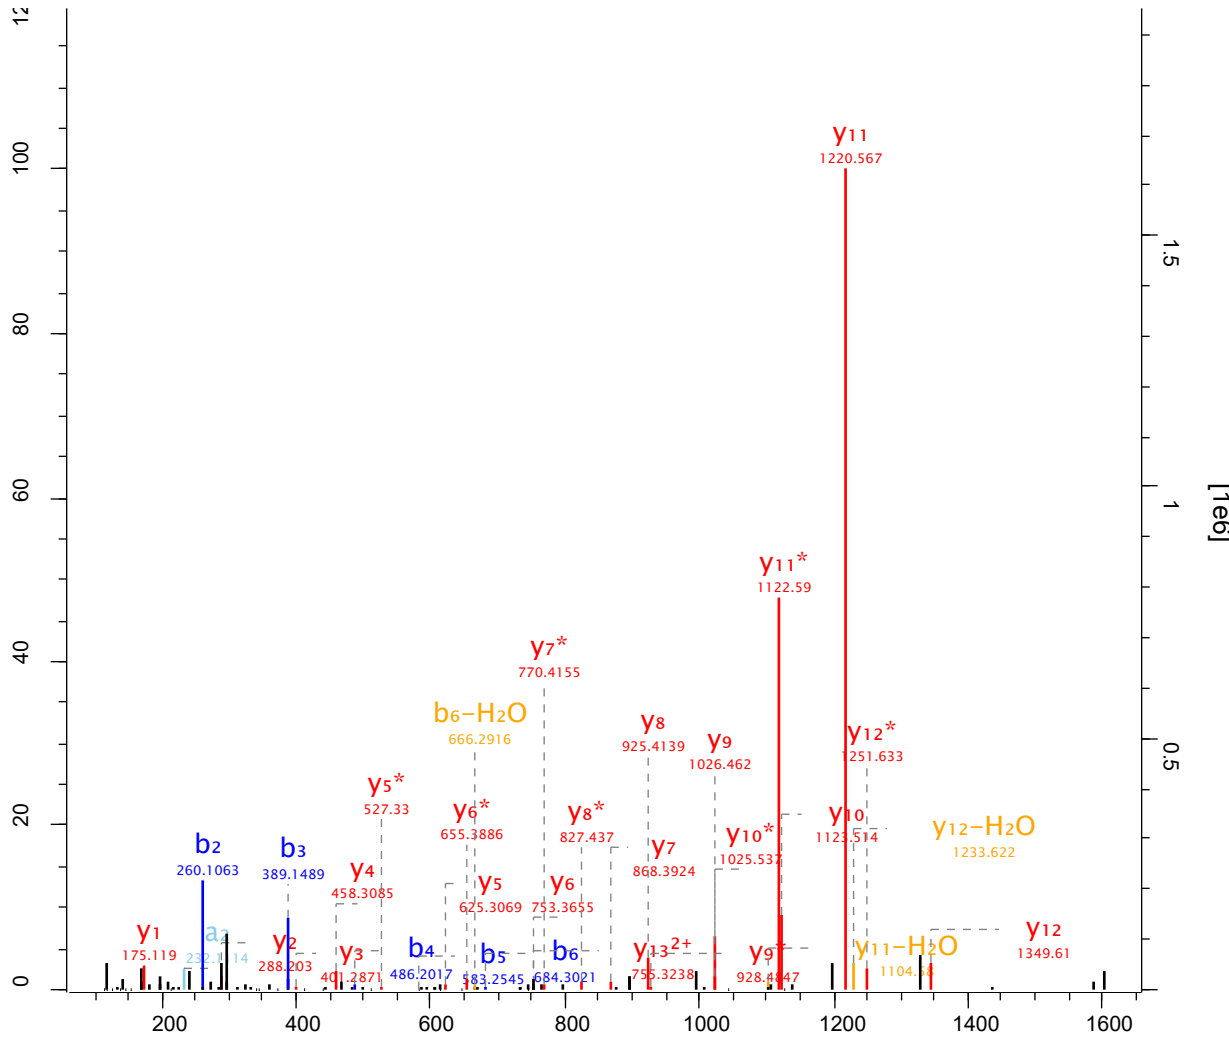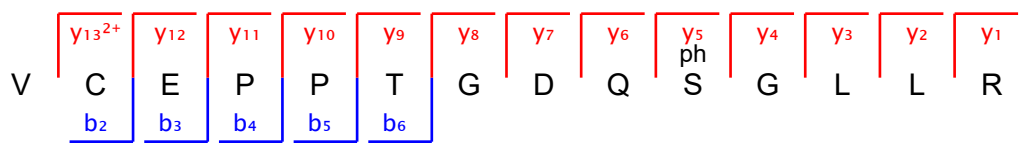

Raw file Scan Method Score m/z  
 sys\_05\_2 21880 FTMS; HCD 104.21 766.83

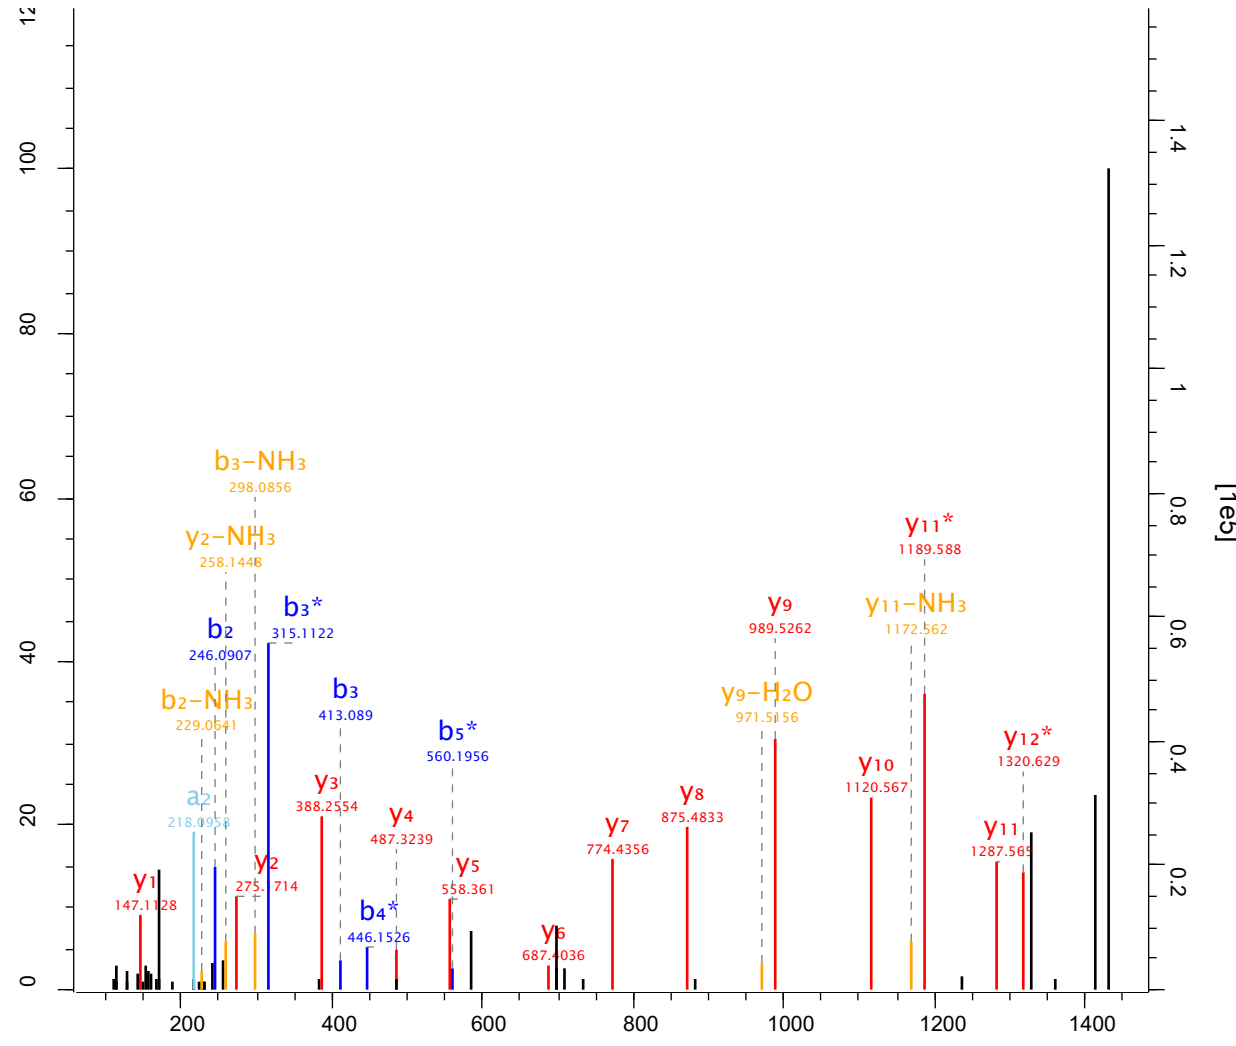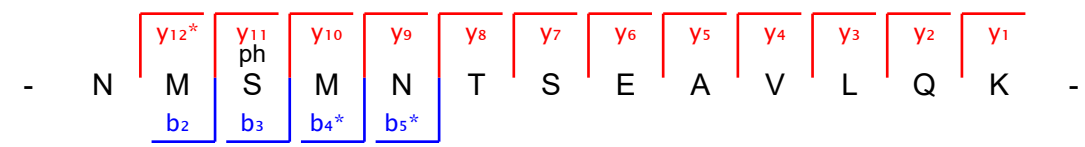

Raw file Scan Method Score m/z  
 sys\_05\_2 21887 FTMS; HCD 179.67 582.22

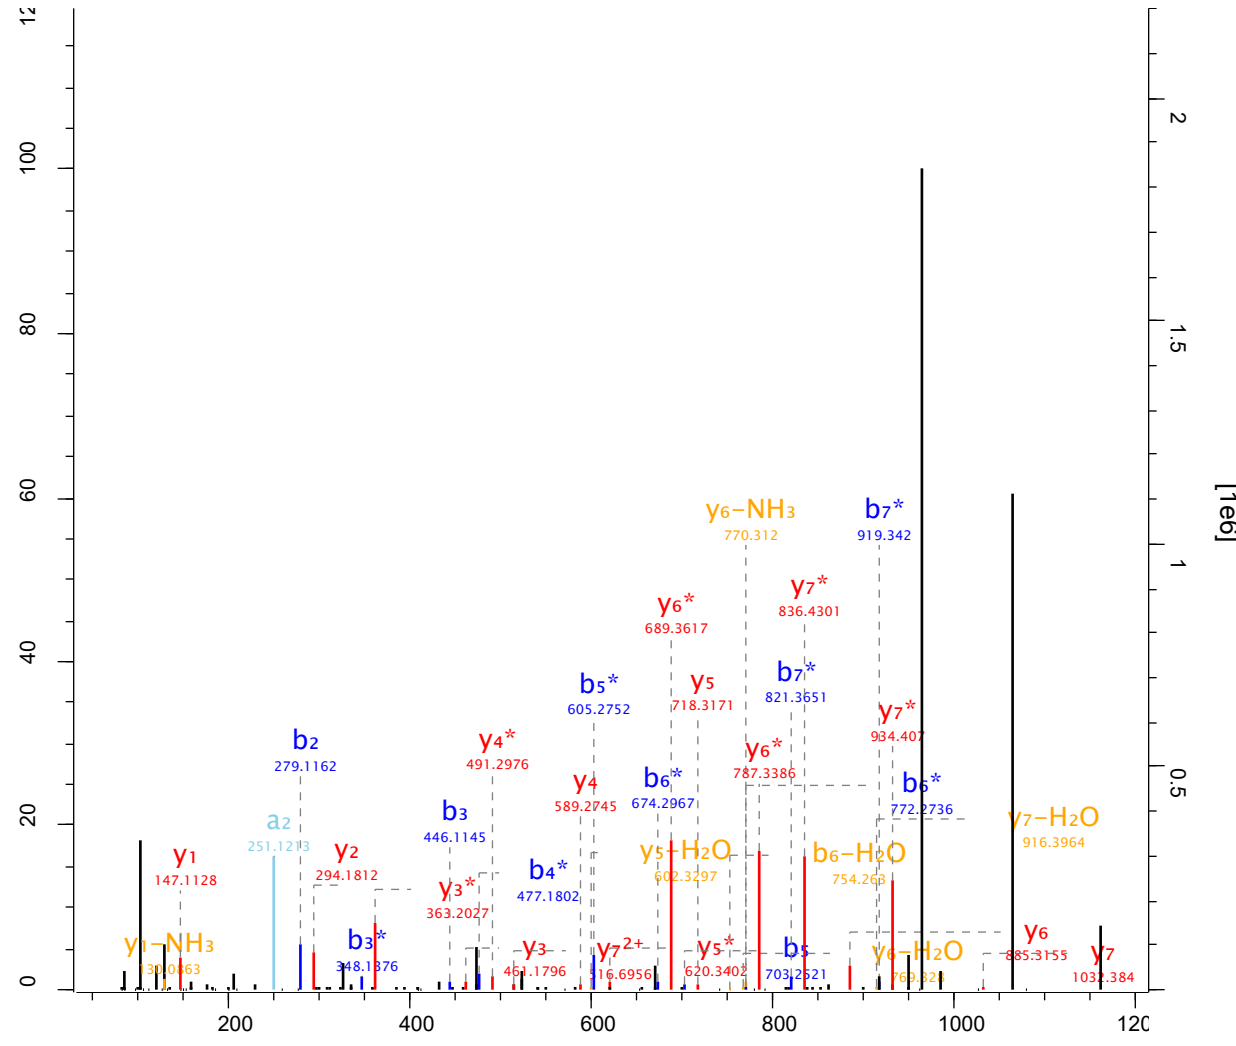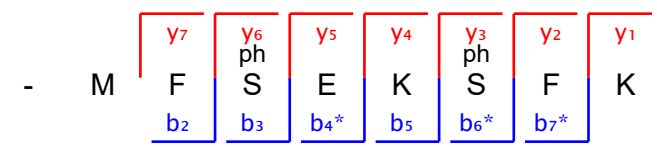

Raw file Scan Method Score m/z  
 sys\_05\_2 21922 FTMS; HCD 75.06 637.29

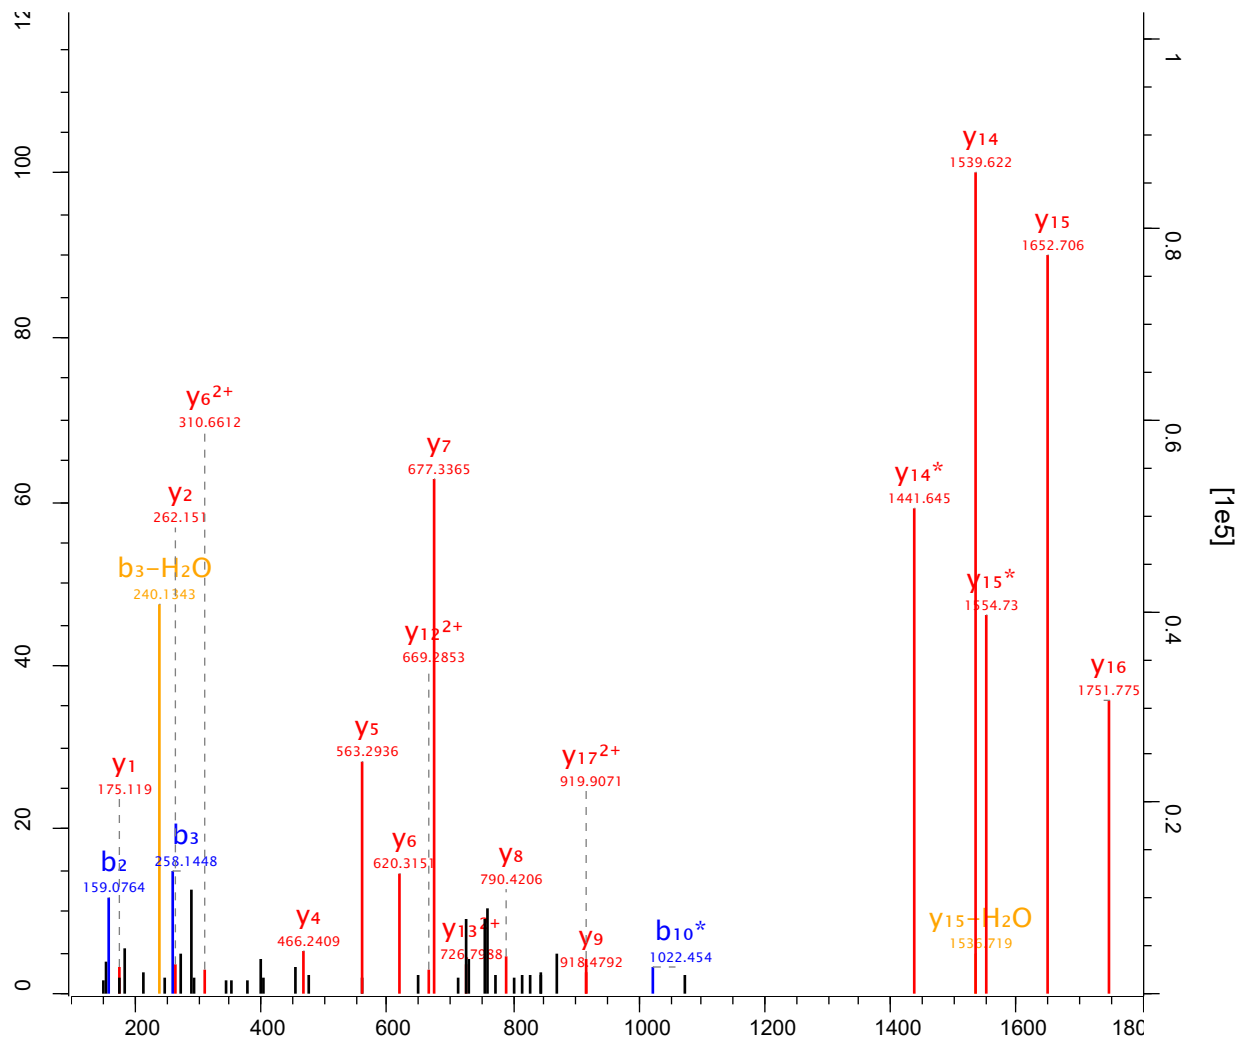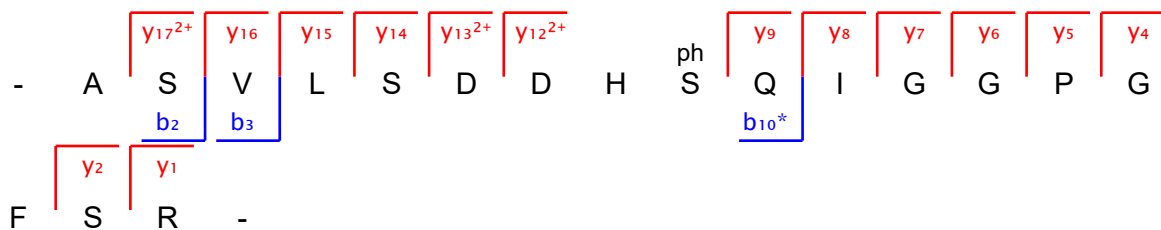

Raw file Scan Method Score m/z  
 sys\_05\_2 22060 FTMS; HCD 255.83 669.62

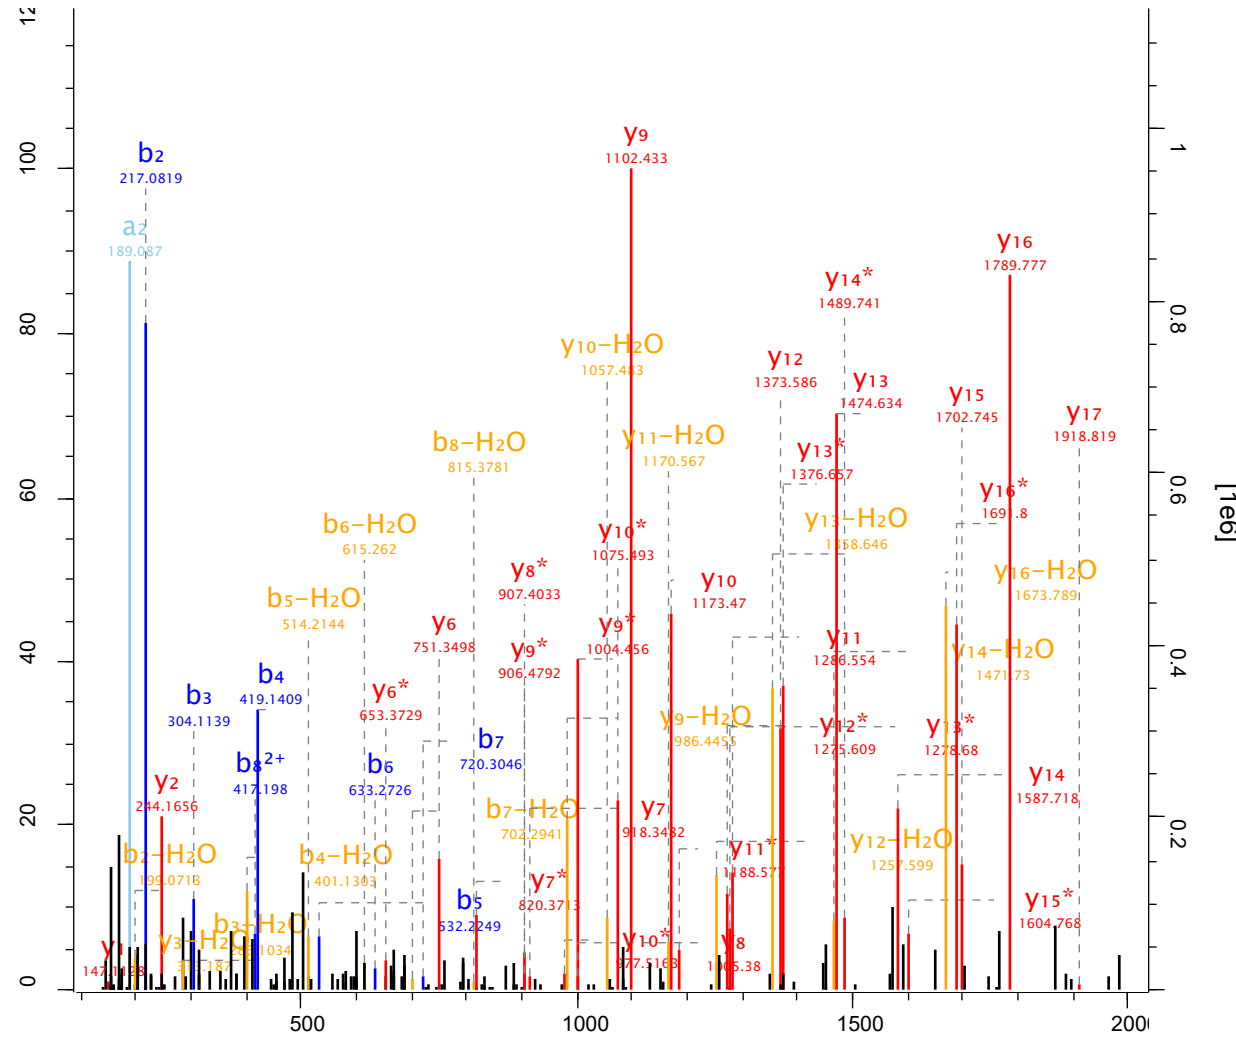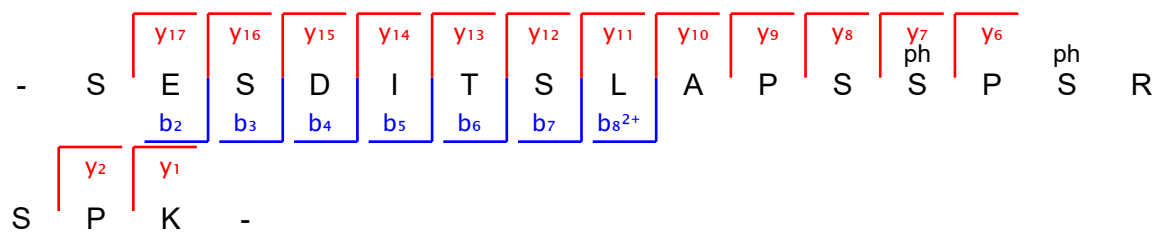

Raw file Scan Method Score m/z  
 sys\_05\_2 22298 FTMS; HCD 67.08 524.72

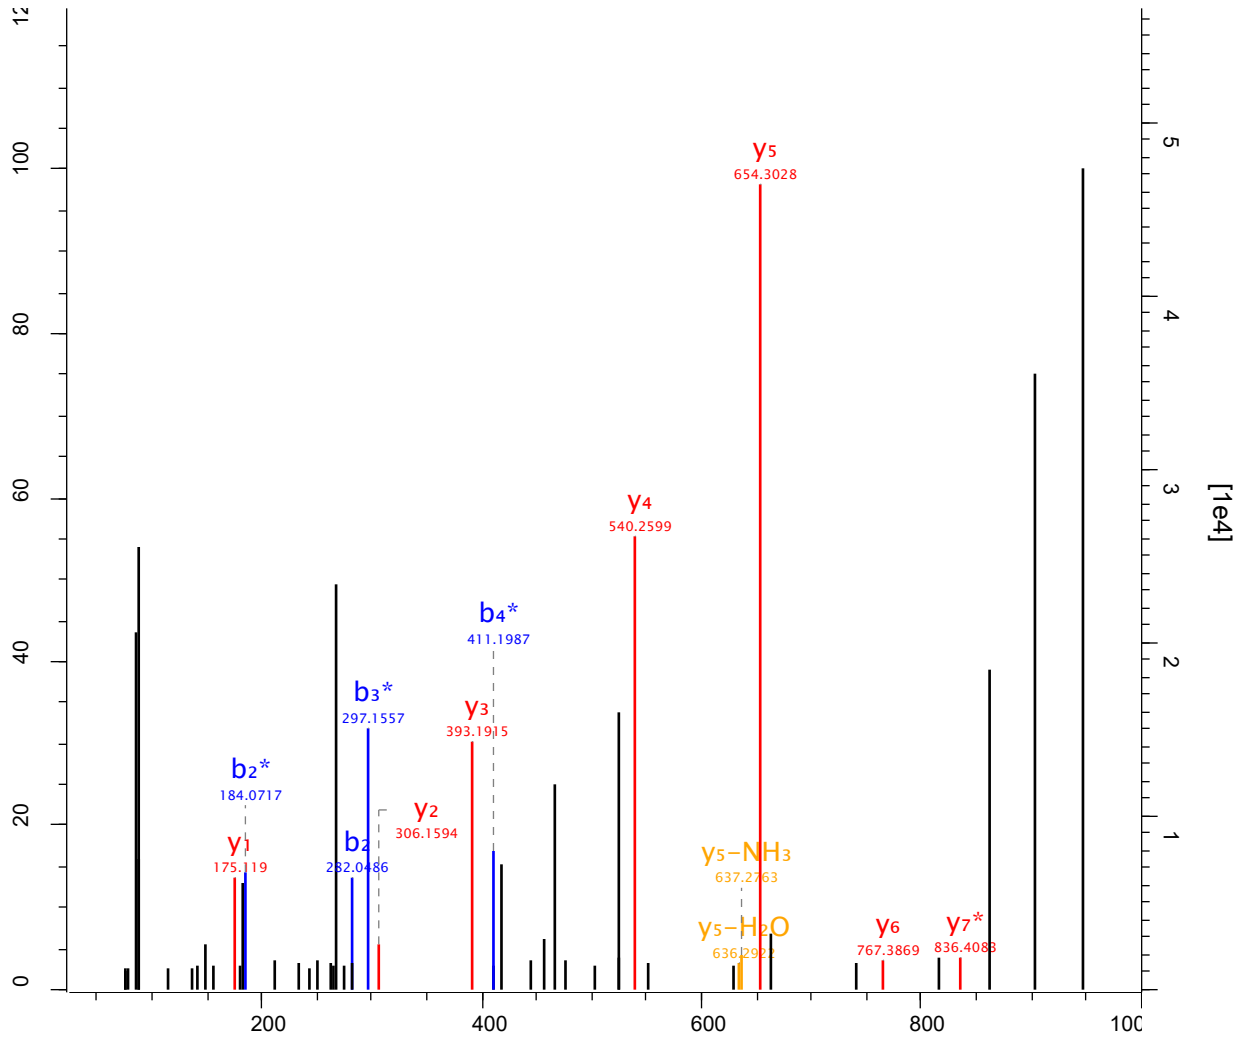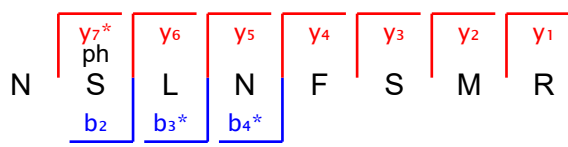

Raw file Scan Method Score m/z  
 sys\_05\_2 22371 FTMS; HCD 147.64 782.34

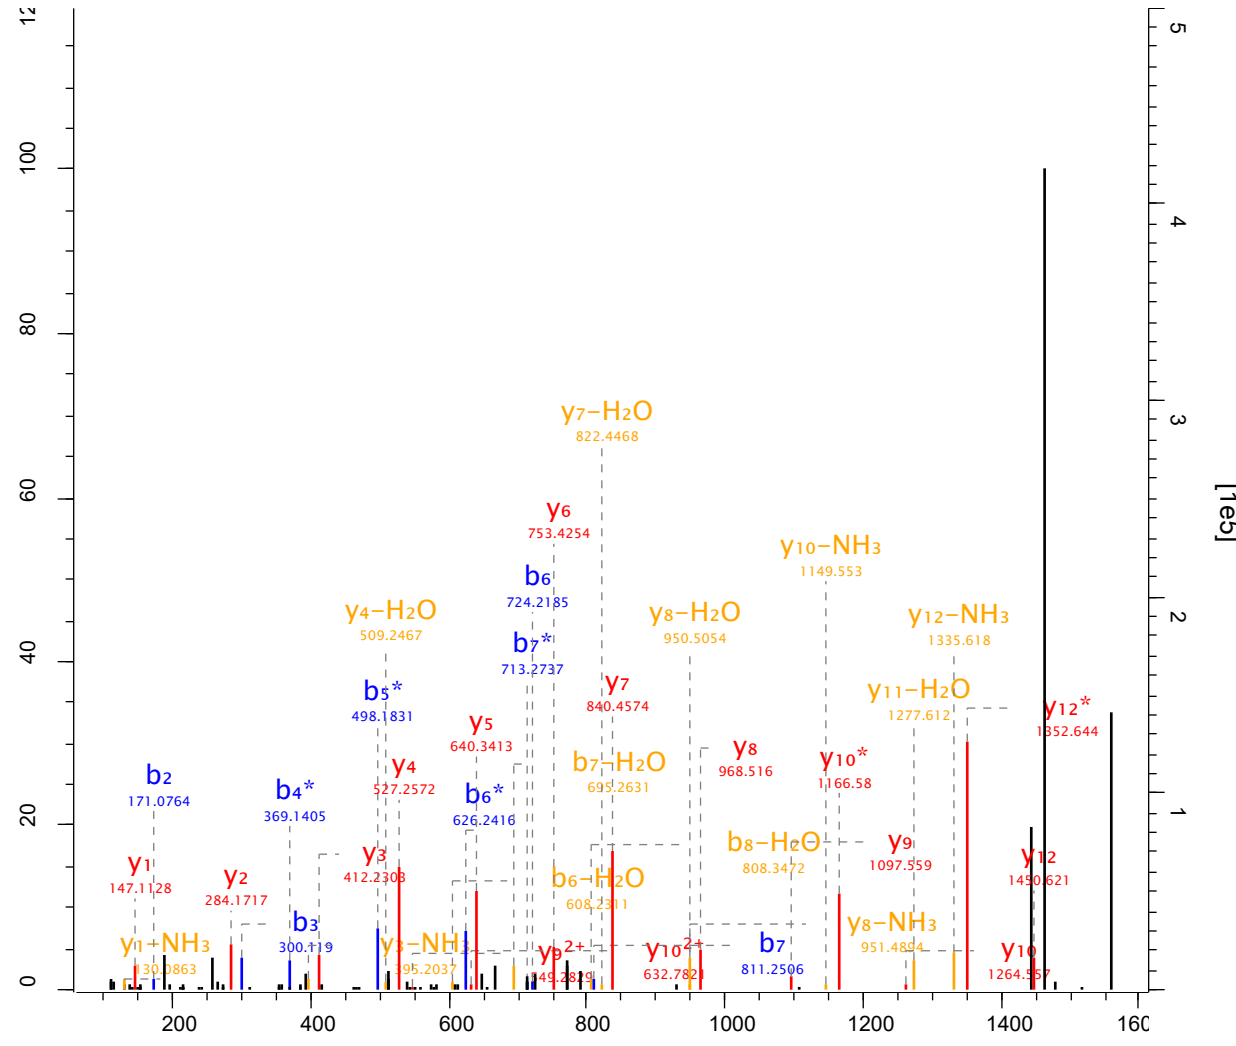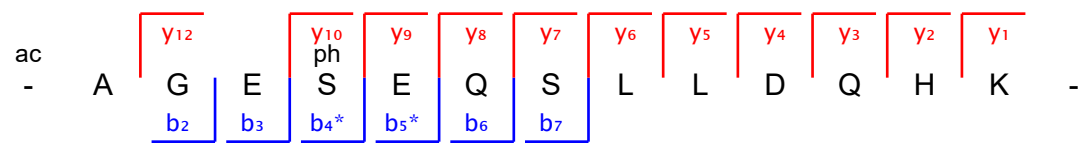

Raw file Scan Method Score m/z  
 sys\_05\_2 22737 FTMS; HCD 113.65 685.82

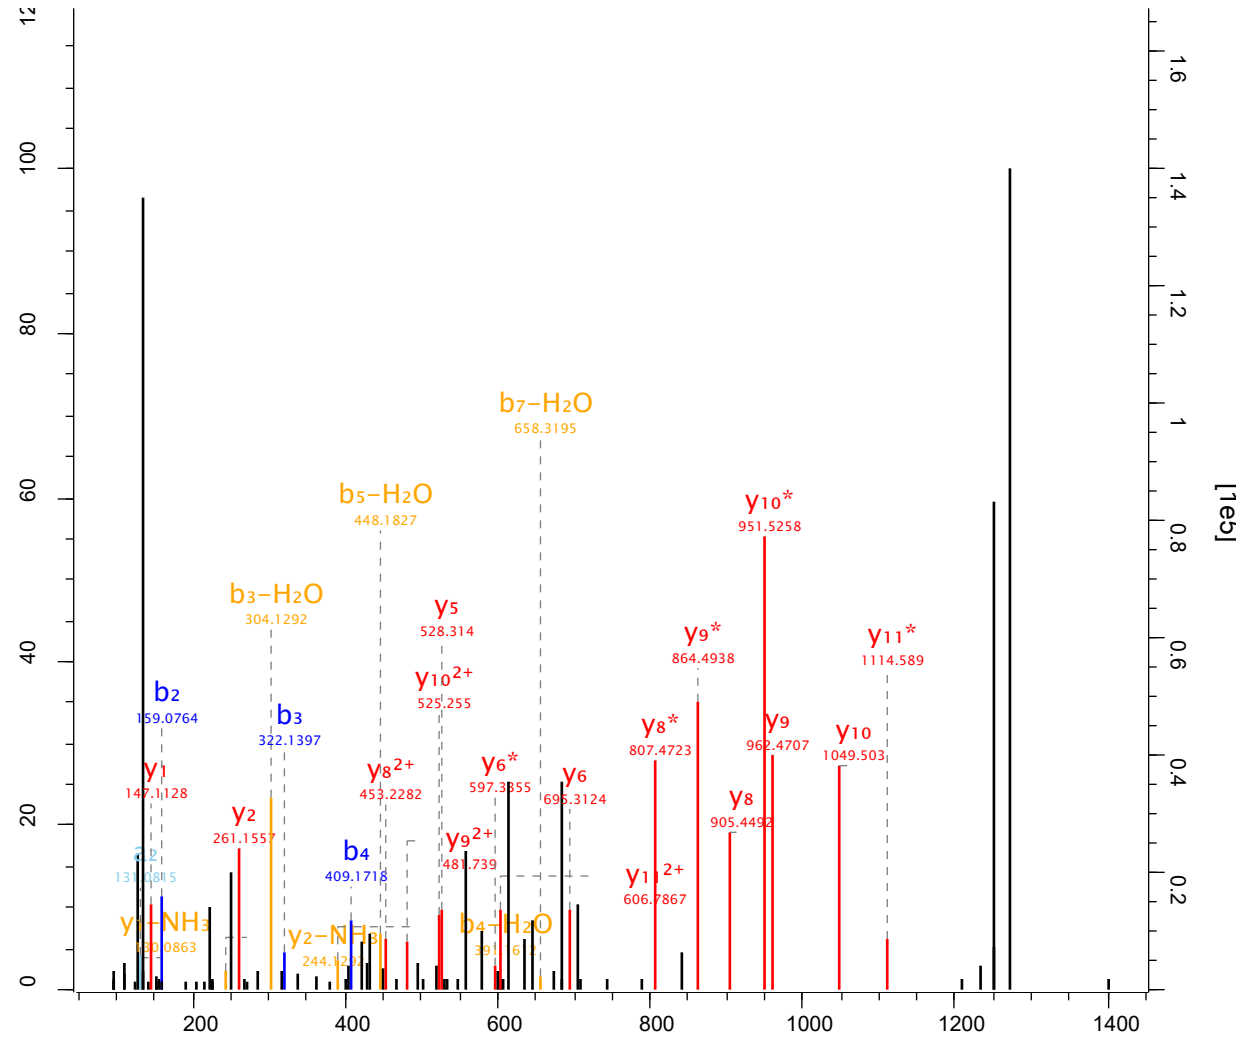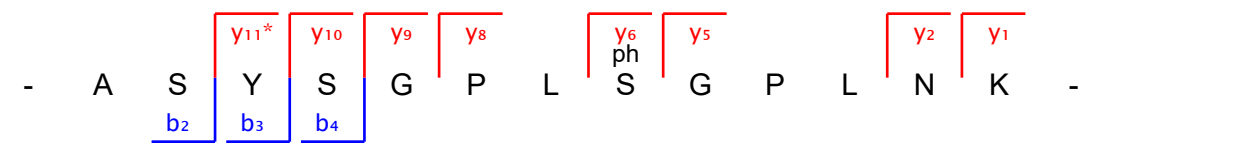



Raw file Scan Method Score m/z  
 sys\_05\_2 23189 FTMS; HCD 104.84 697.29

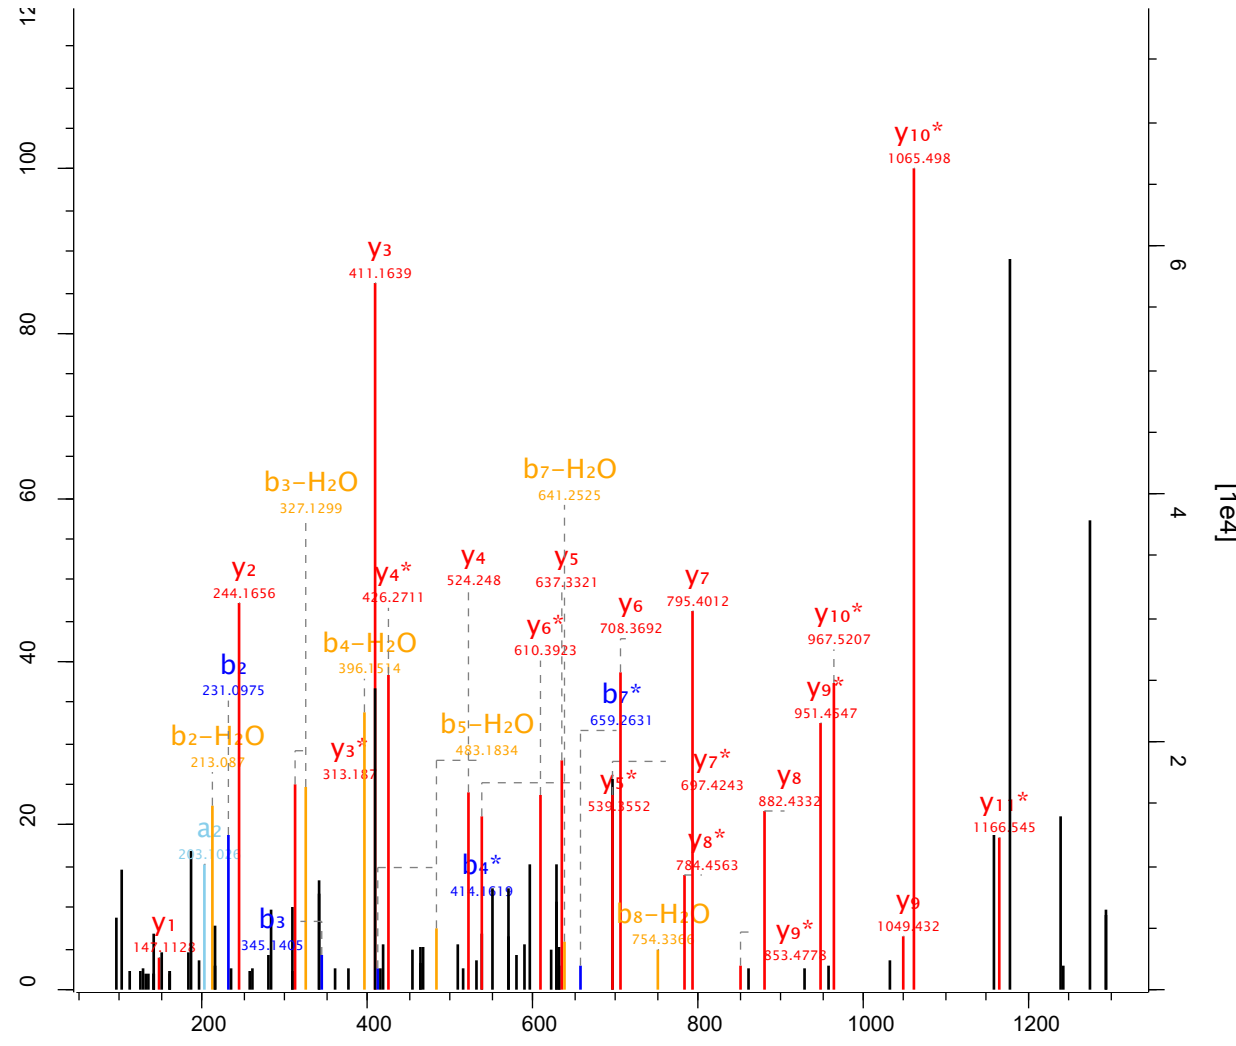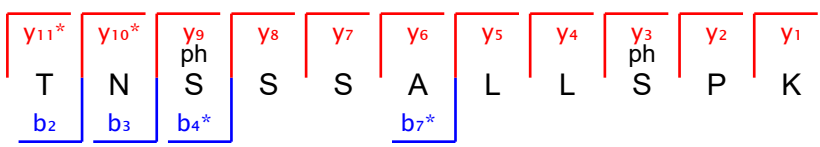

Raw file Scan Method Score m/z  
 sys\_05\_2 23202 FTMS; HCD 120.92 595.27

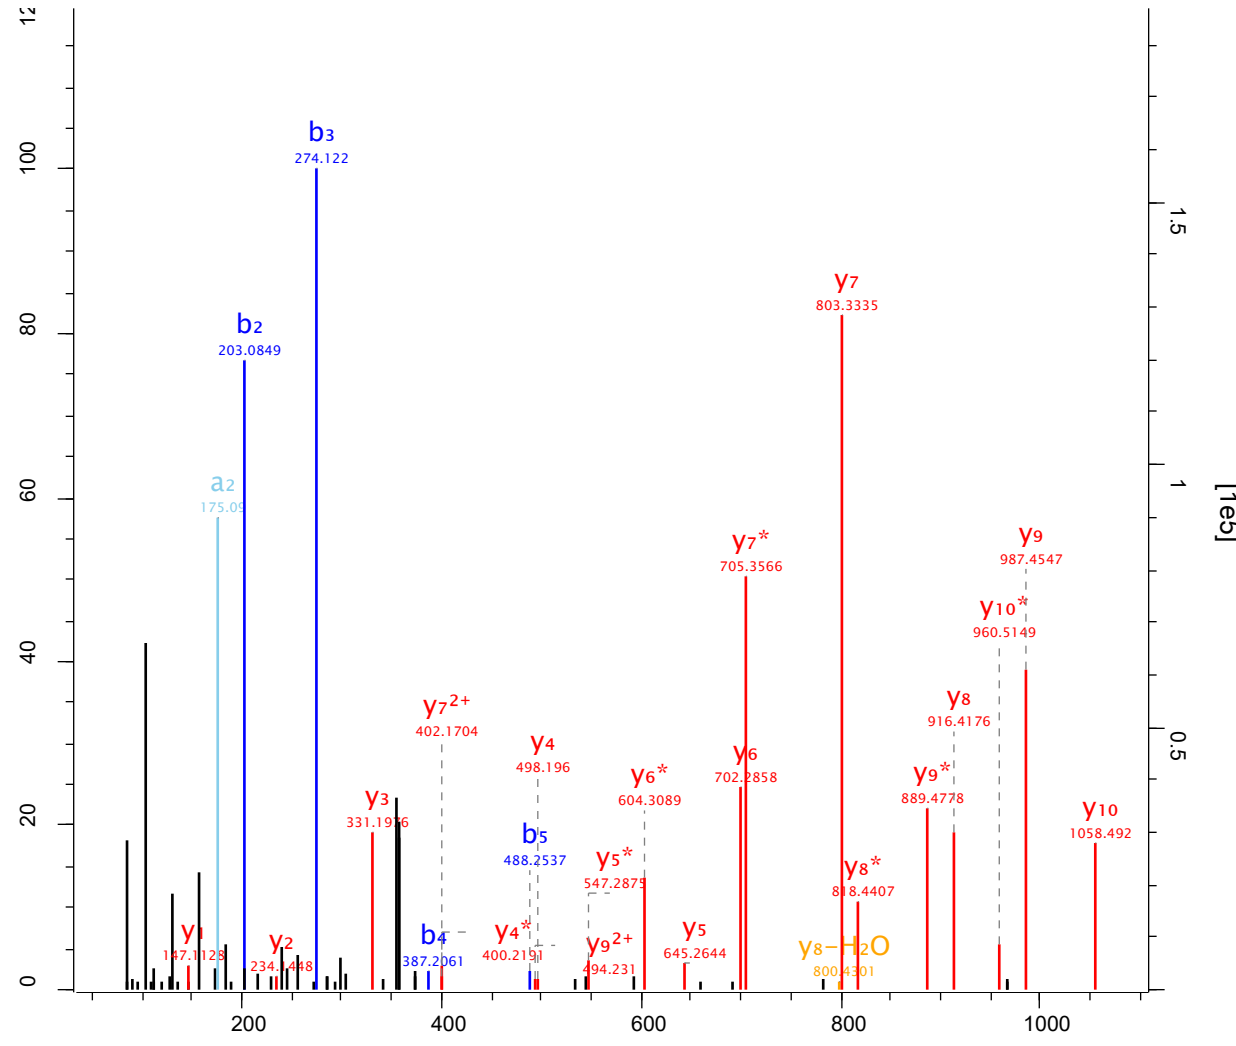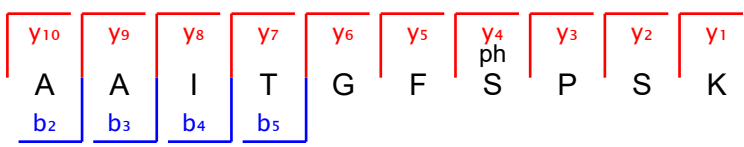

Raw file Scan Method Score m/z  
 sys\_05\_2 23420 FTMS; HCD 141.82 639.27

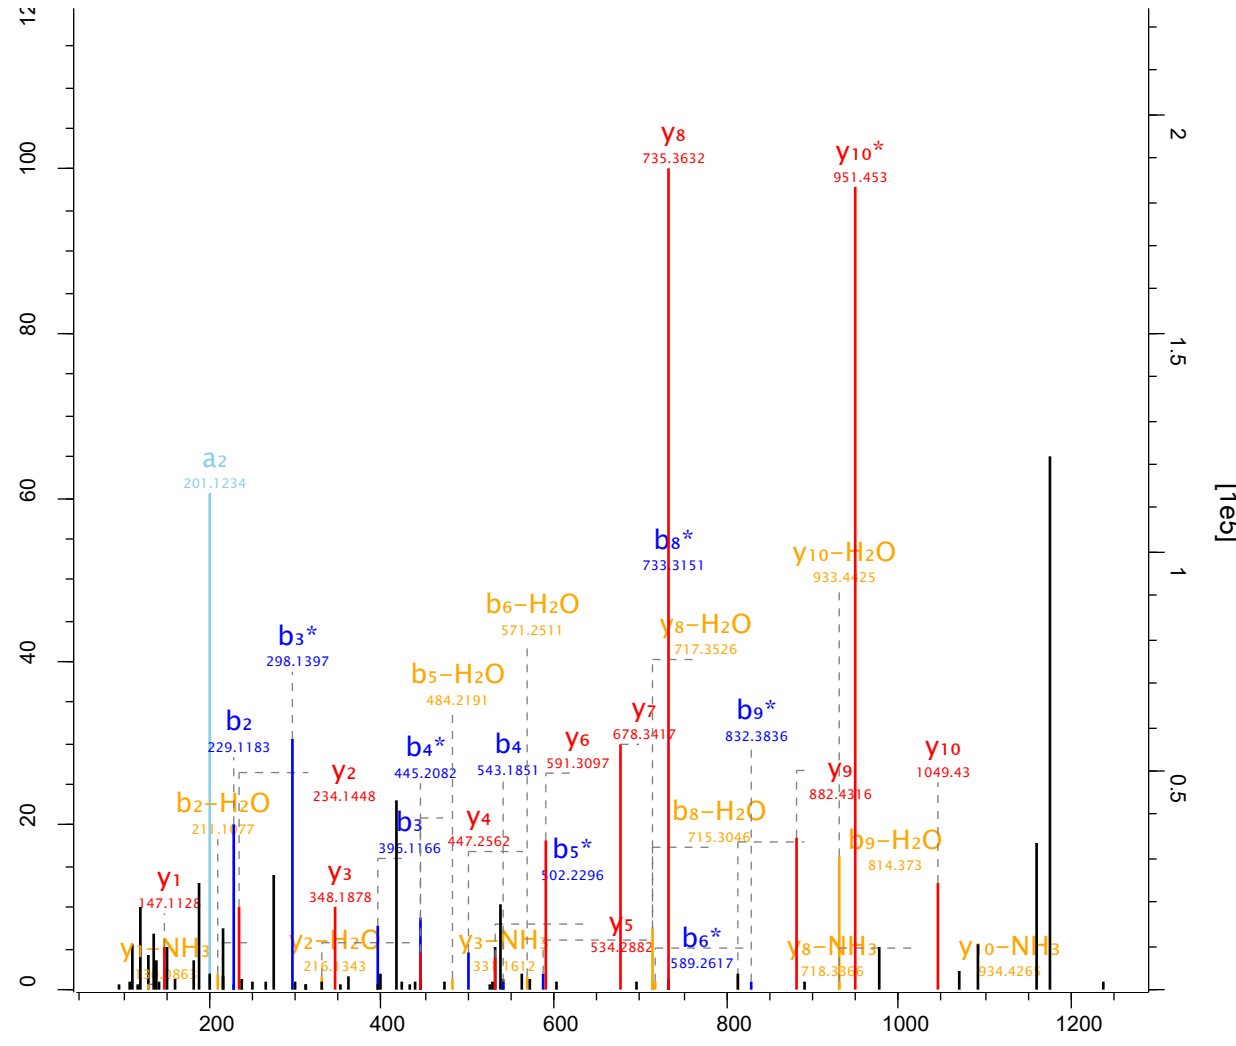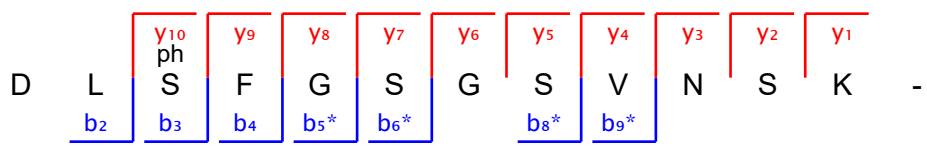

Raw file Scan Method Score m/z  
 sys\_05\_2 23525 FTMS; HCD 176.46 738.32

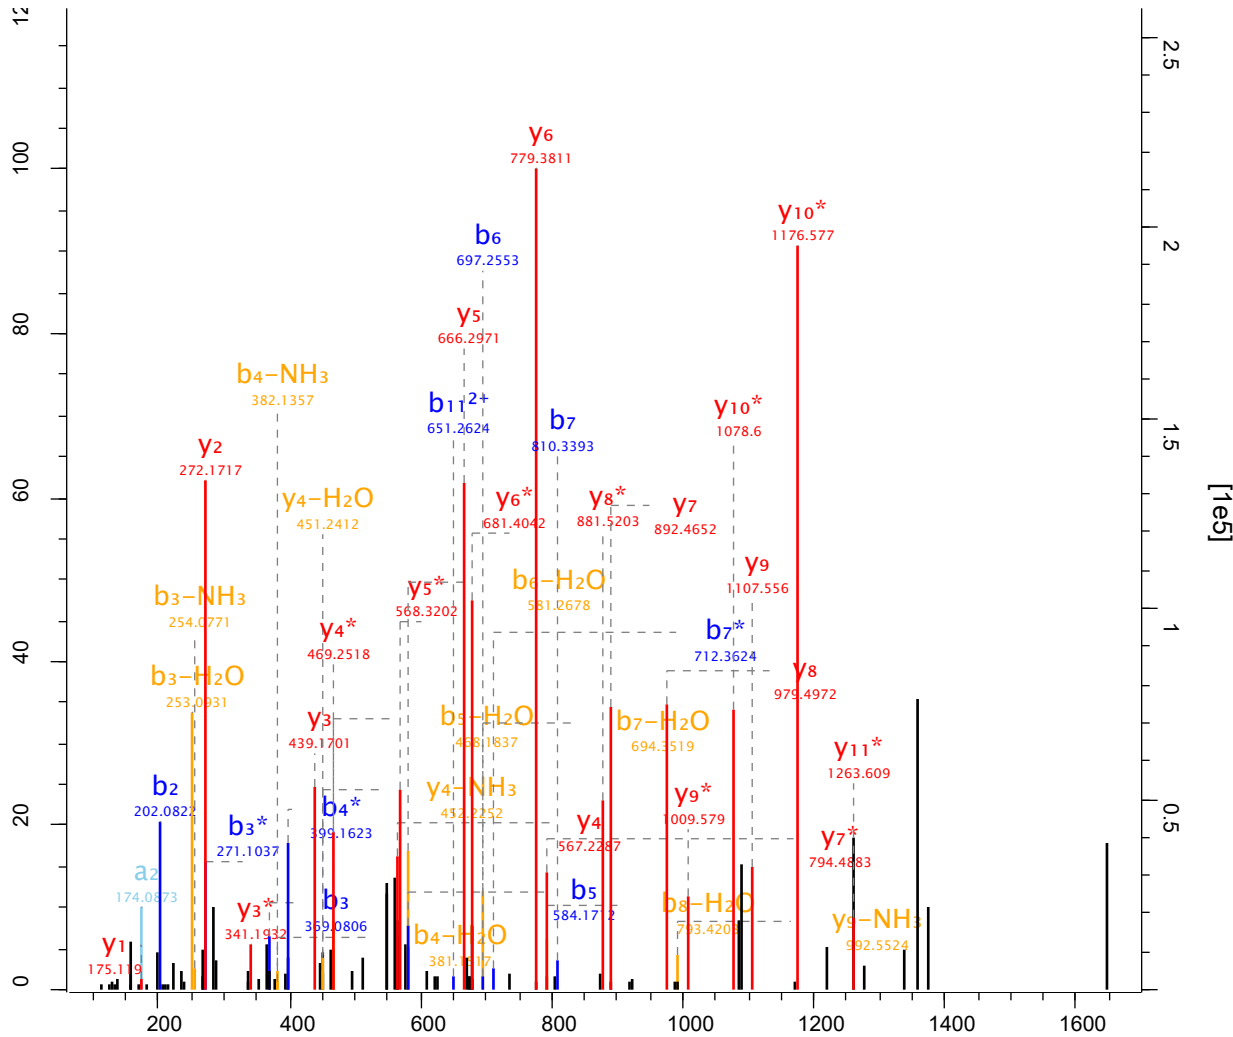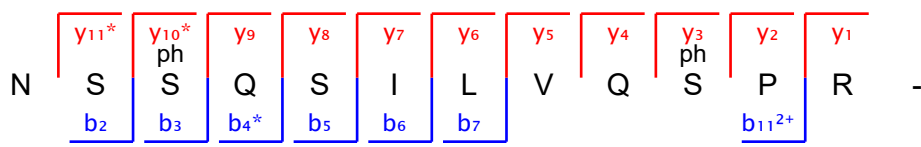



Raw file Scan Method Score m/z  
 sys\_05\_2 23651 FTMS; HCD 71.88 681.81

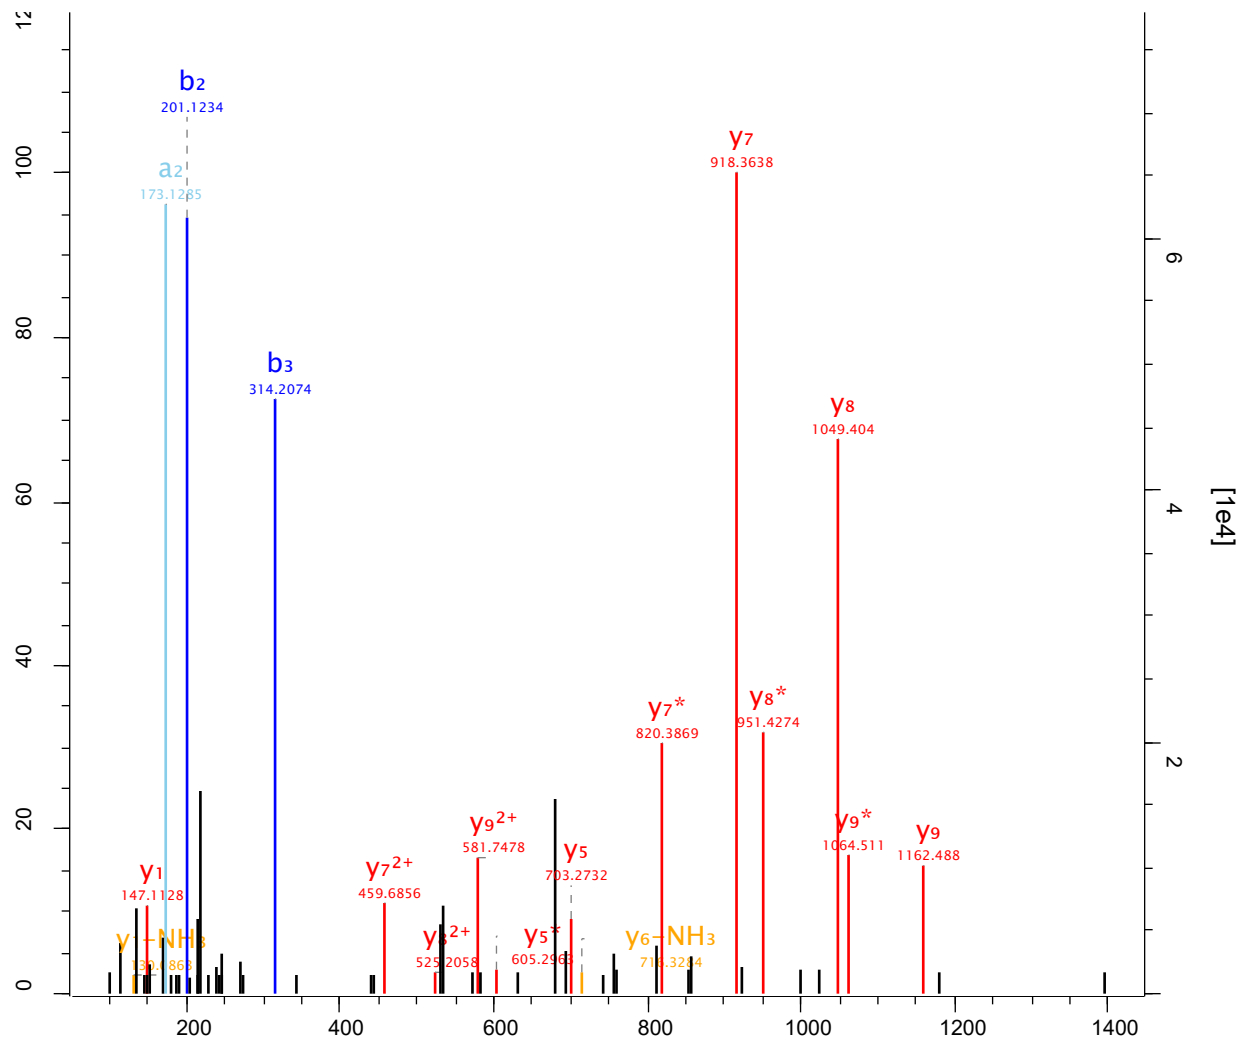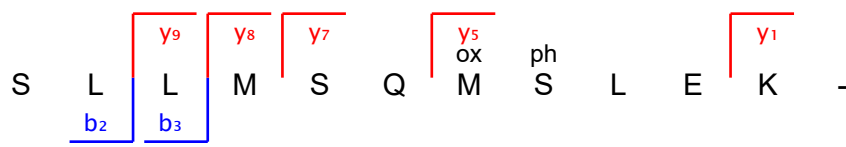

Raw file Scan Method Score m/z  
 sys\_05\_2 23668 FTMS; HCD 177.57 539.24

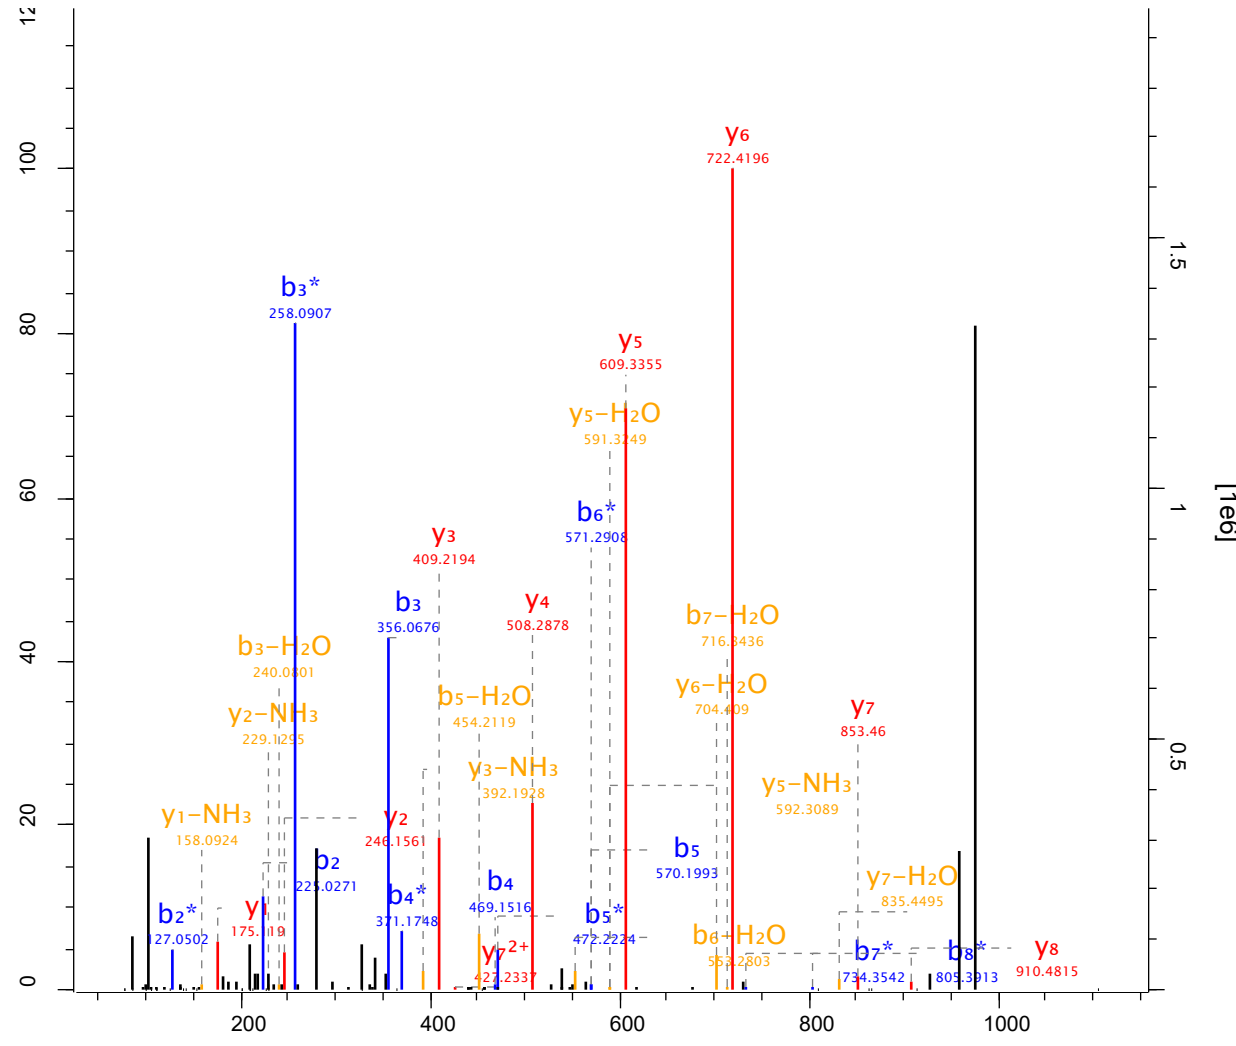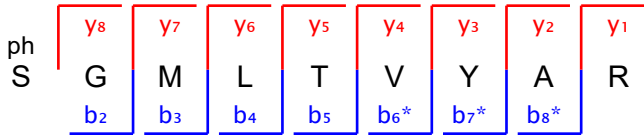

Raw file Scan Method Score m/z  
 sys\_05\_2 23760 FTMS; HCD 48.53 620.26

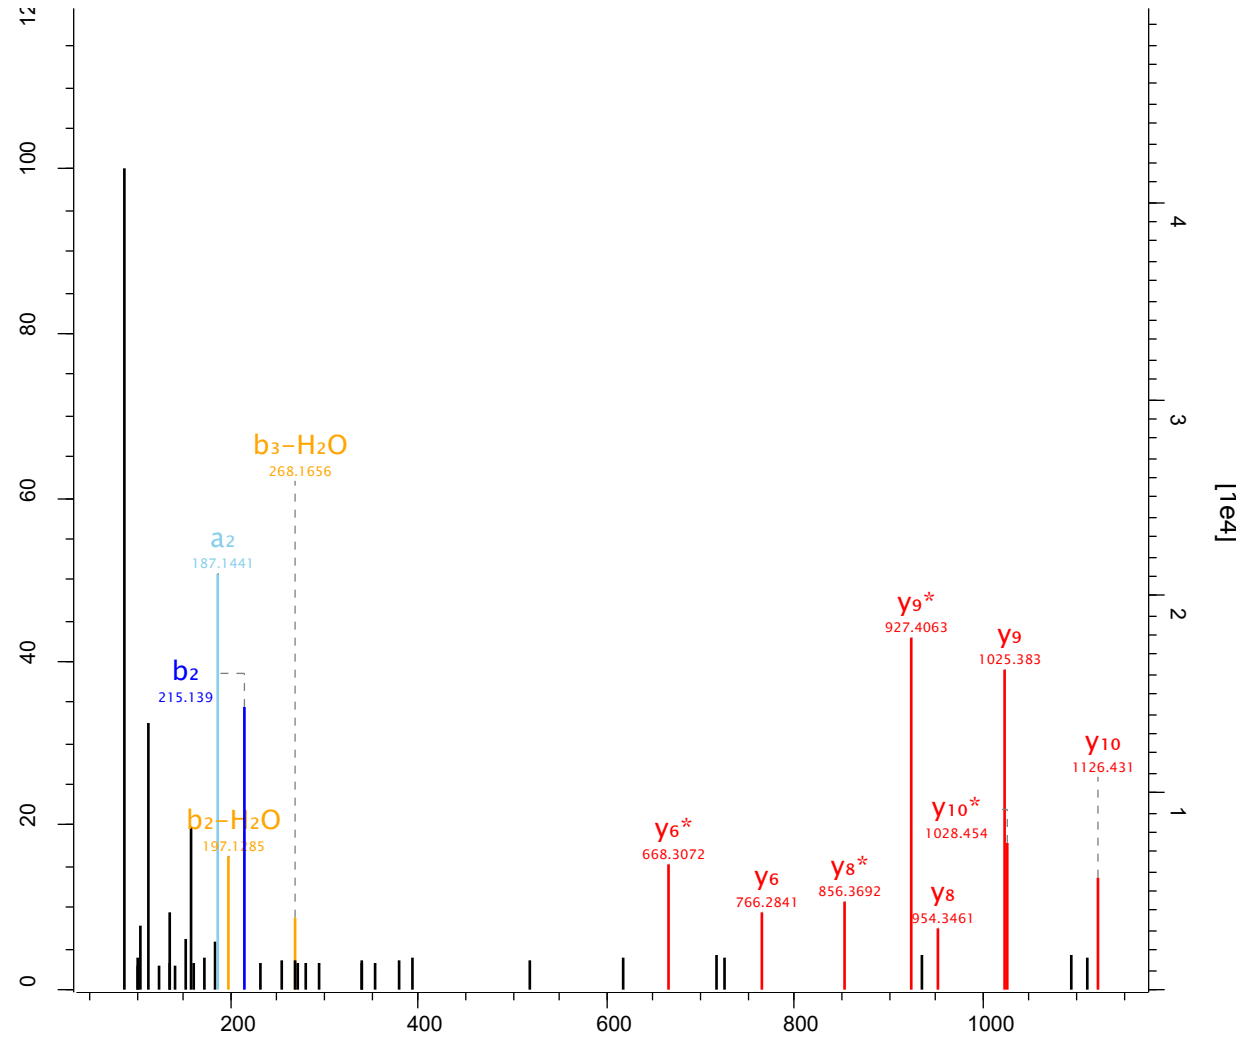

- I T A G M S S M S F K -  
 (Fragmentation labels: y10, y9, y8, y6<sub>ph</sub>, b2)



Raw file Scan Method Score m/z  
 sys\_05\_2 23844 FTMS; HCD 159.26 775.38

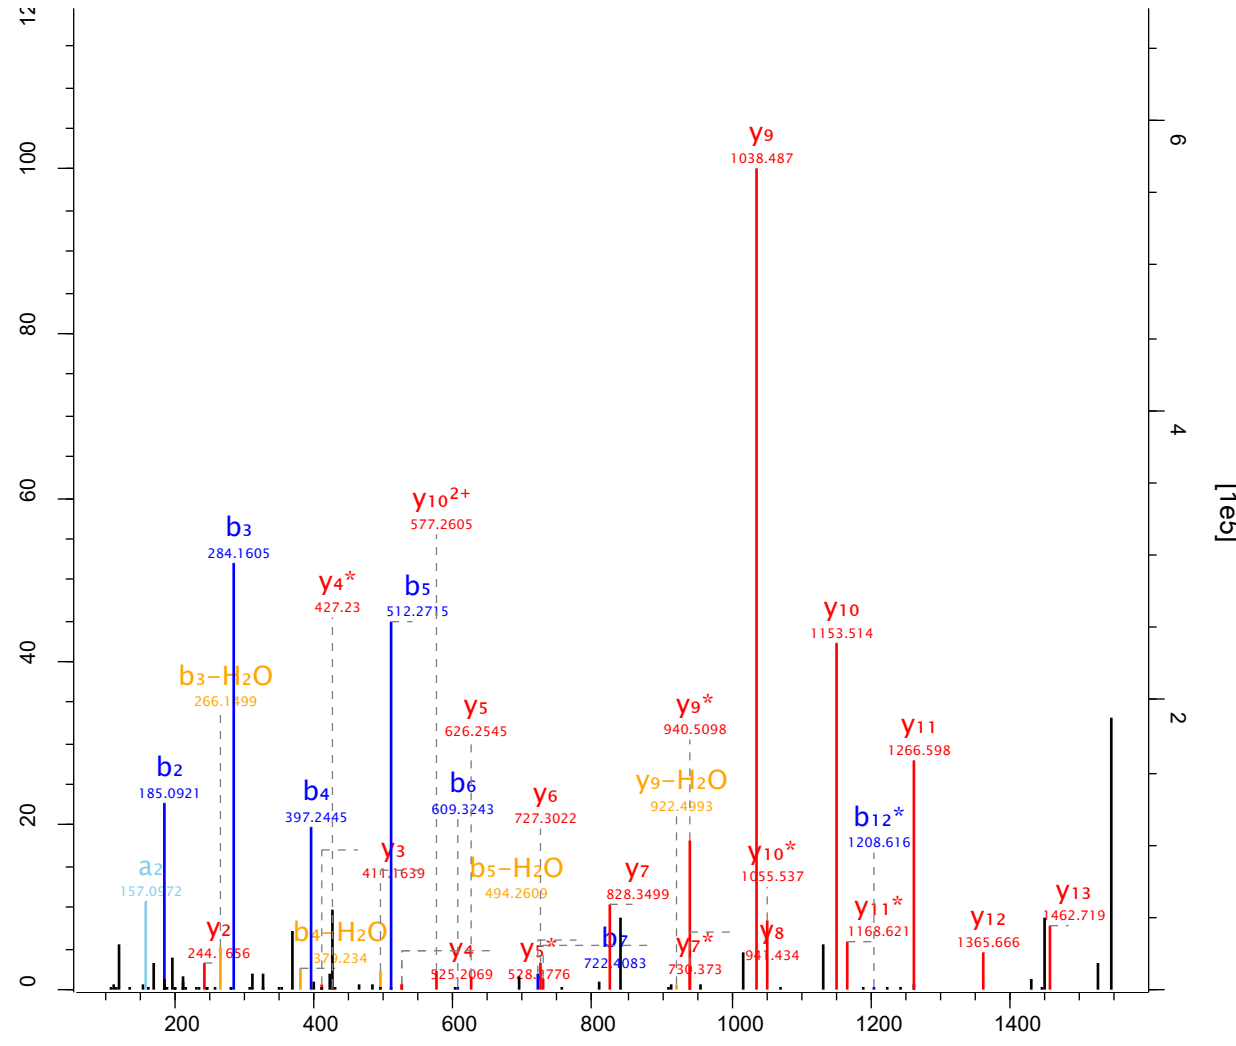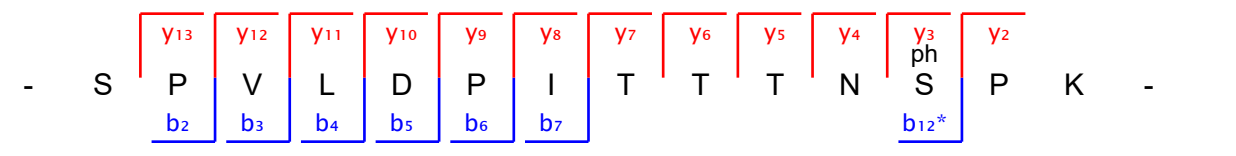

Raw file Scan Method Score m/z  
 sys\_05\_2 23852 FTMS; HCD 138.05 843.89

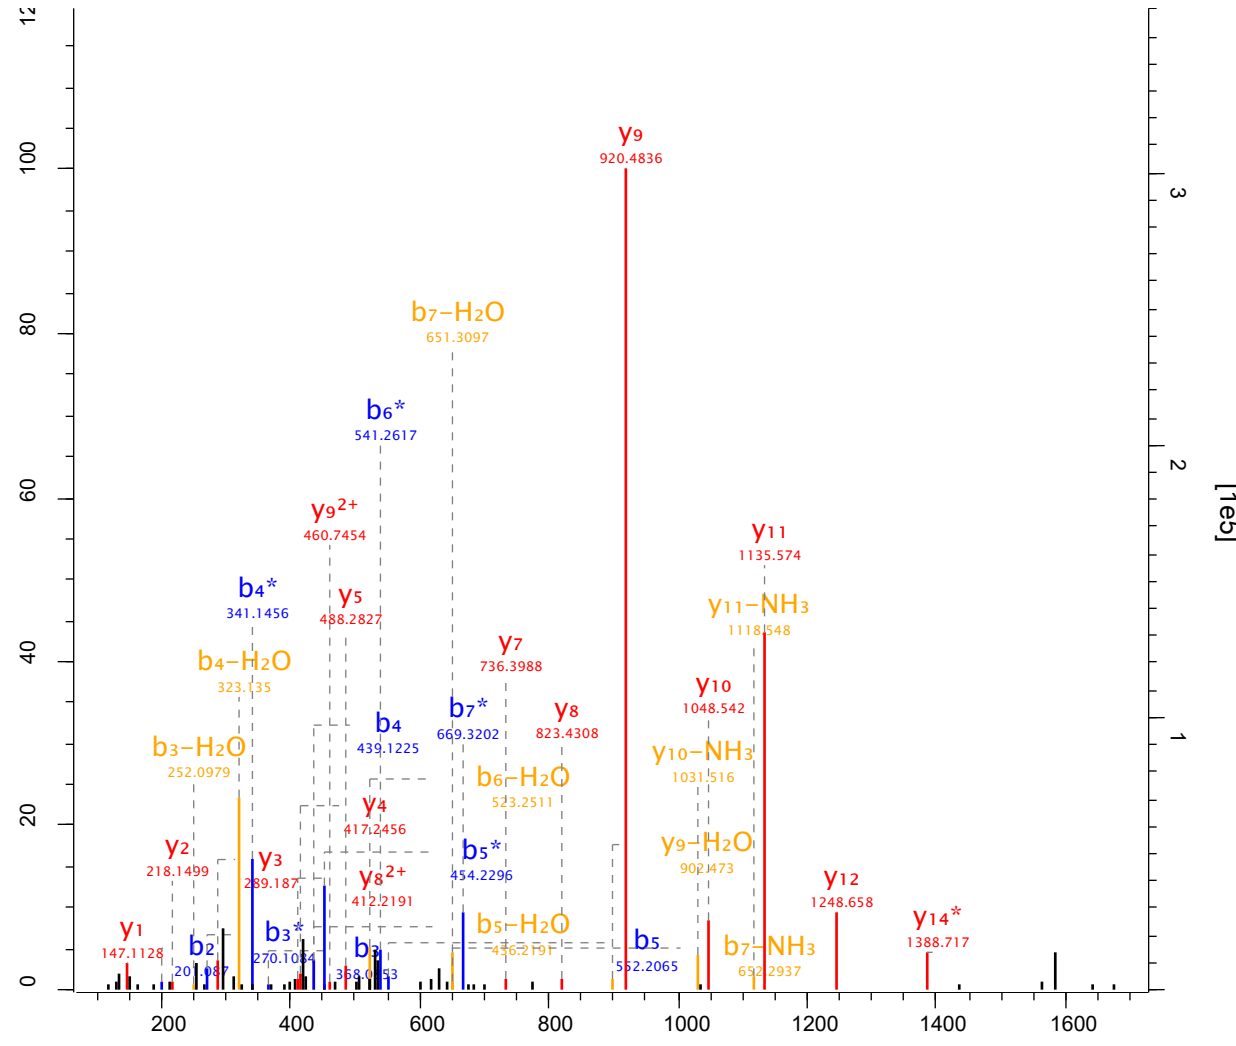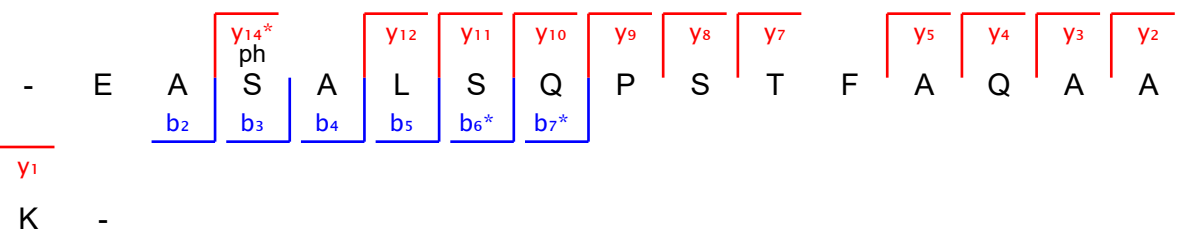

Raw file Scan Method Score m/z  
 sys\_05\_2 24230 FTMS; HCD 123.19 701.31

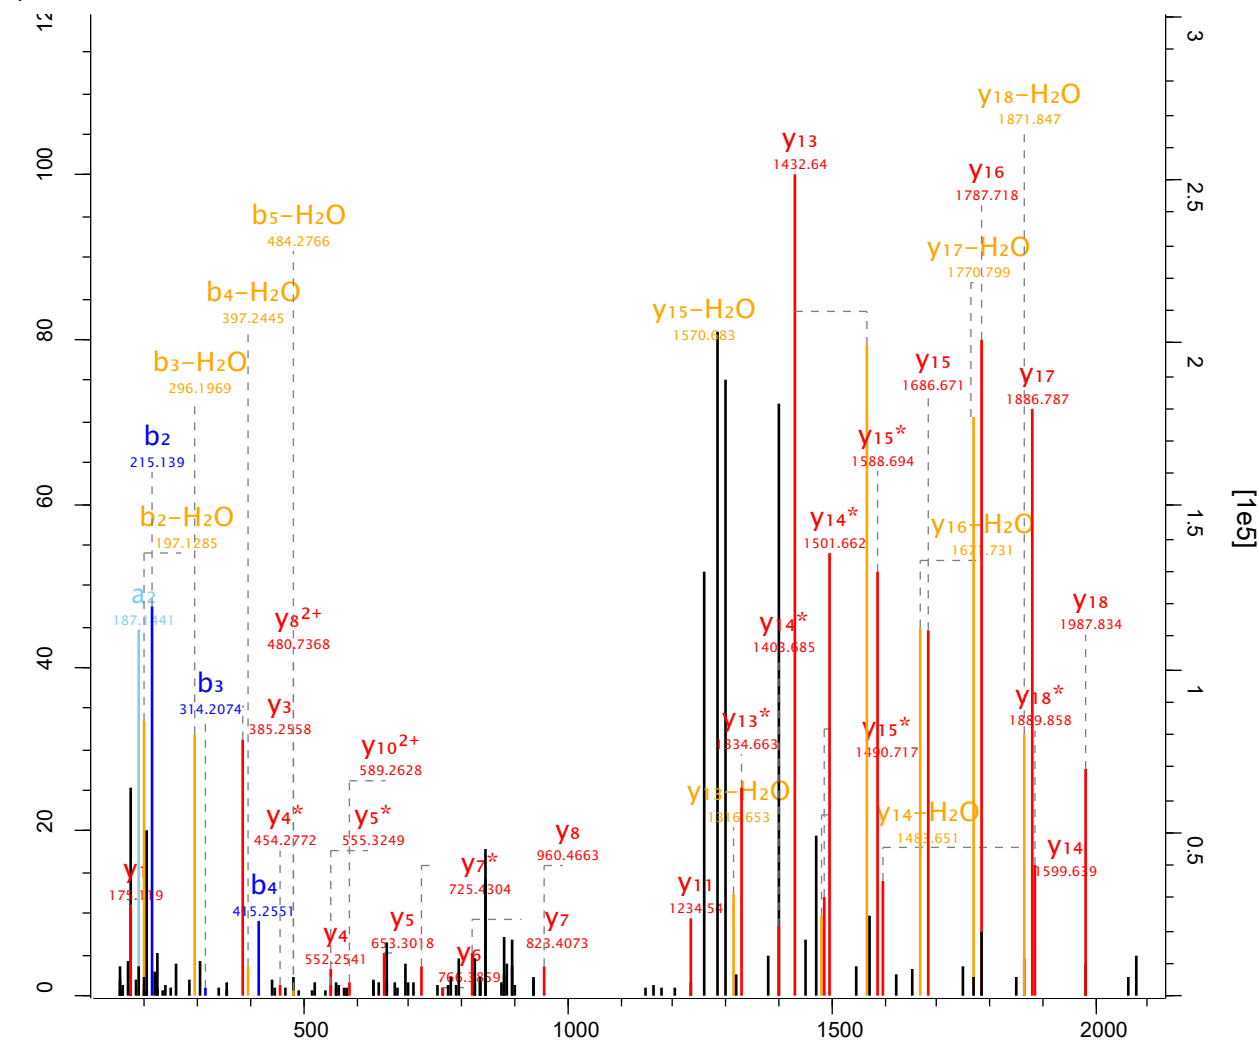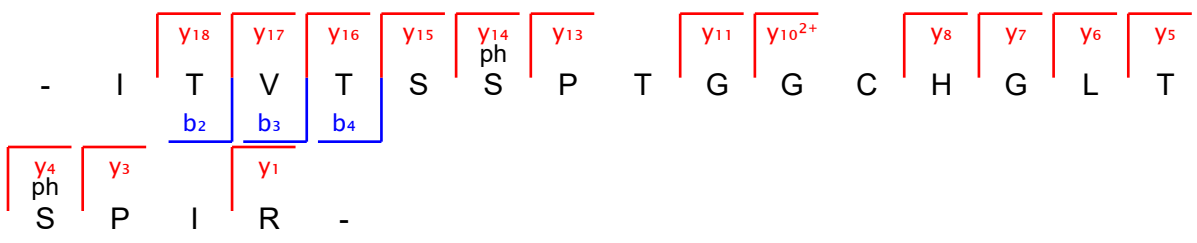

Raw file Scan Method Score m/z  
 sys\_05\_2 24402 FTMS; HCD 127.01 885.91

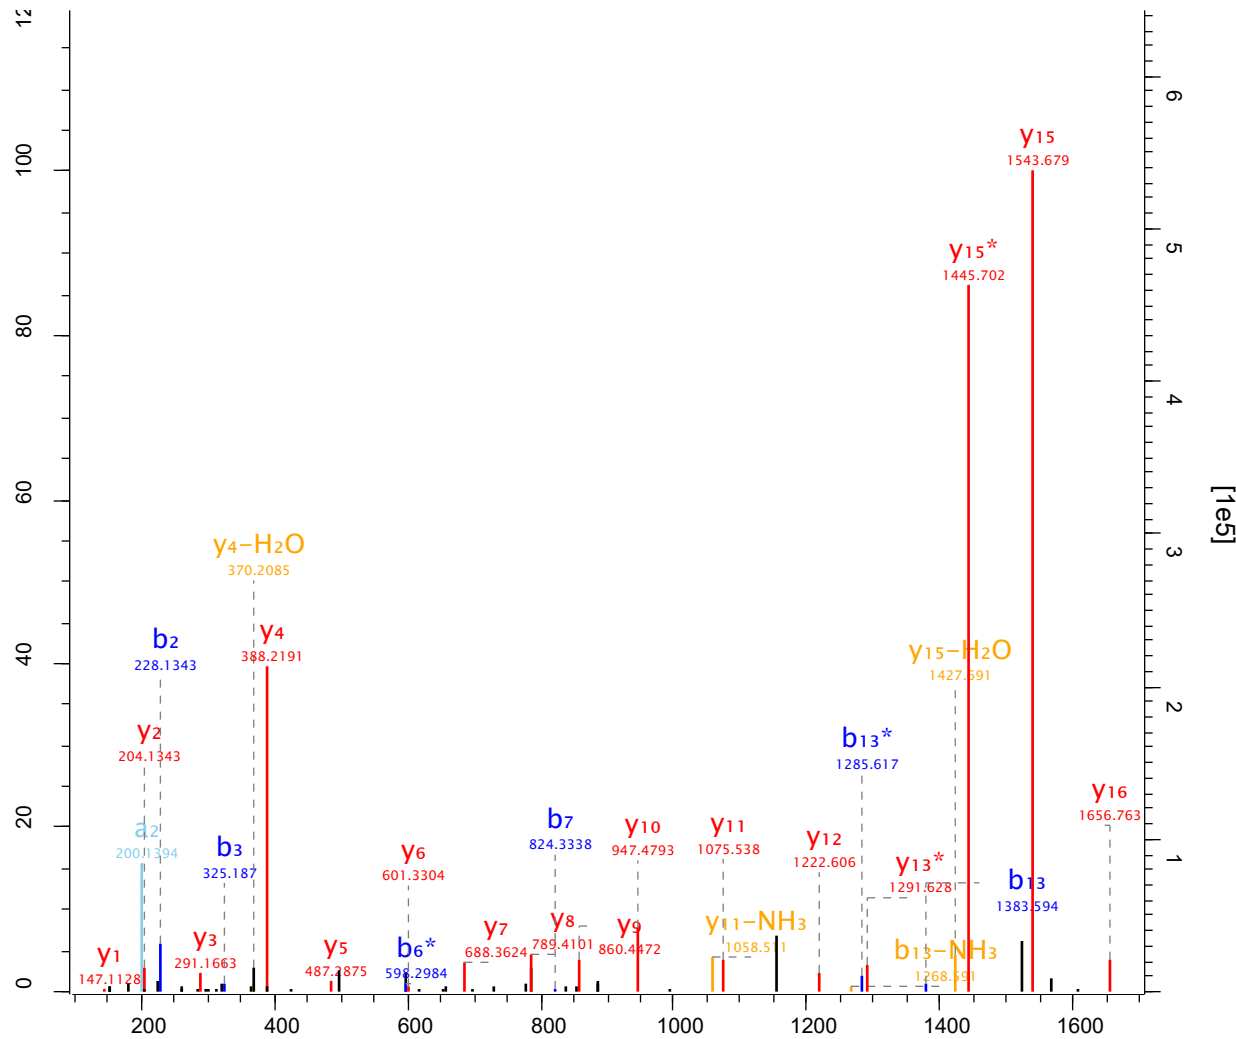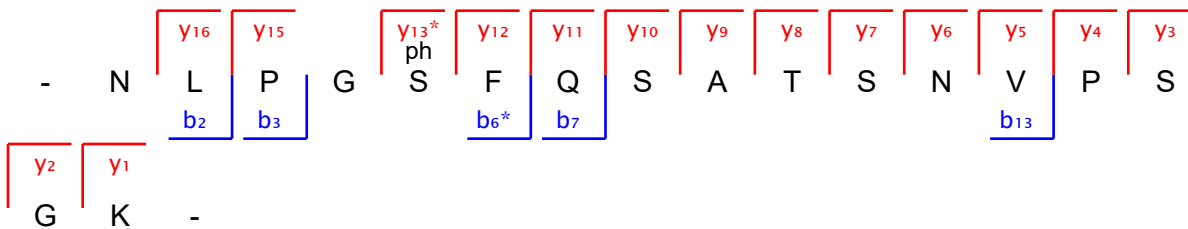

Raw file Scan Method Score m/z  
 sys\_05\_2 24423 FTMS; HCD 46.07 599.78

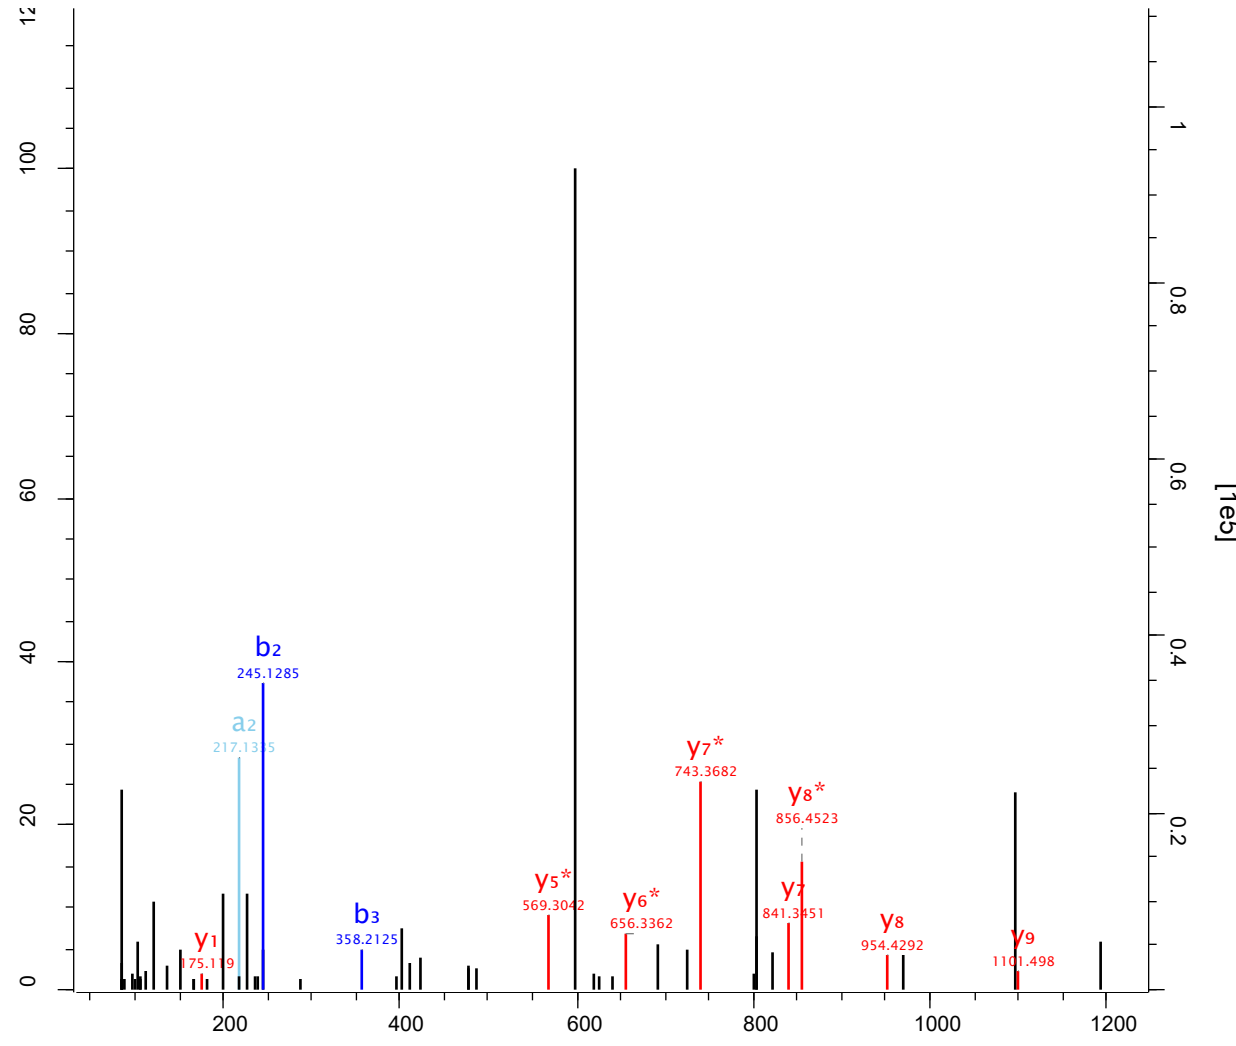

- P F I S S P ph S L D R -

y9
y8
y7
y6\*
y5\*
y1

b2
b3

Raw file Scan Method Score m/z  
 sys\_05\_2 24616 FTMS; HCD 224.42 627.3

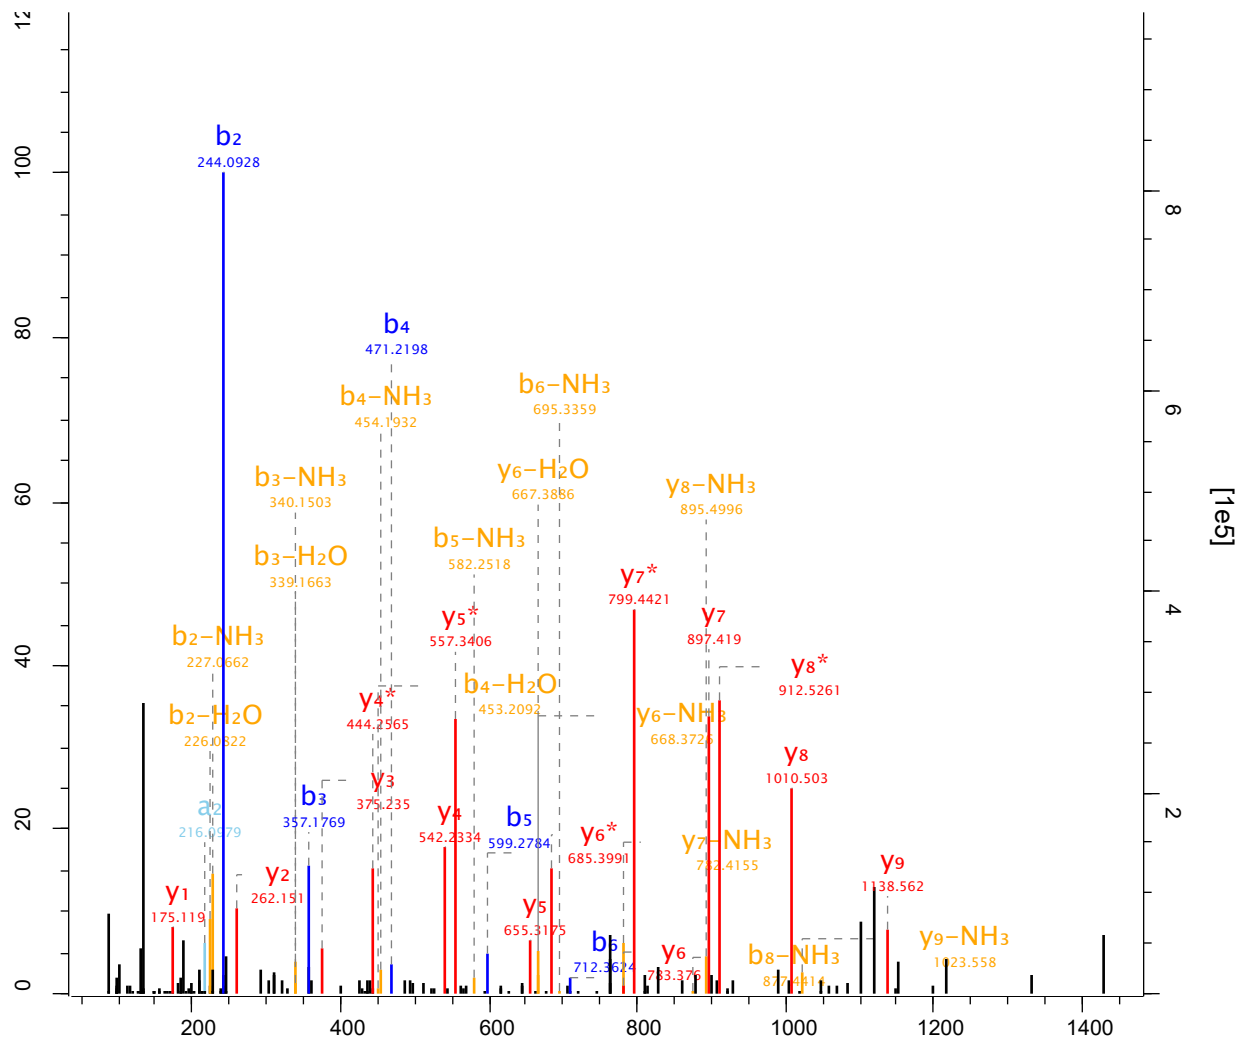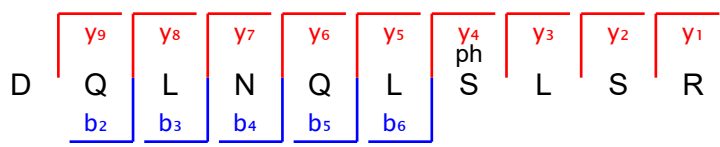

Raw file Scan Method Score m/z  
 sys\_05\_2 24877 FTMS; HCD 105.79 890.41

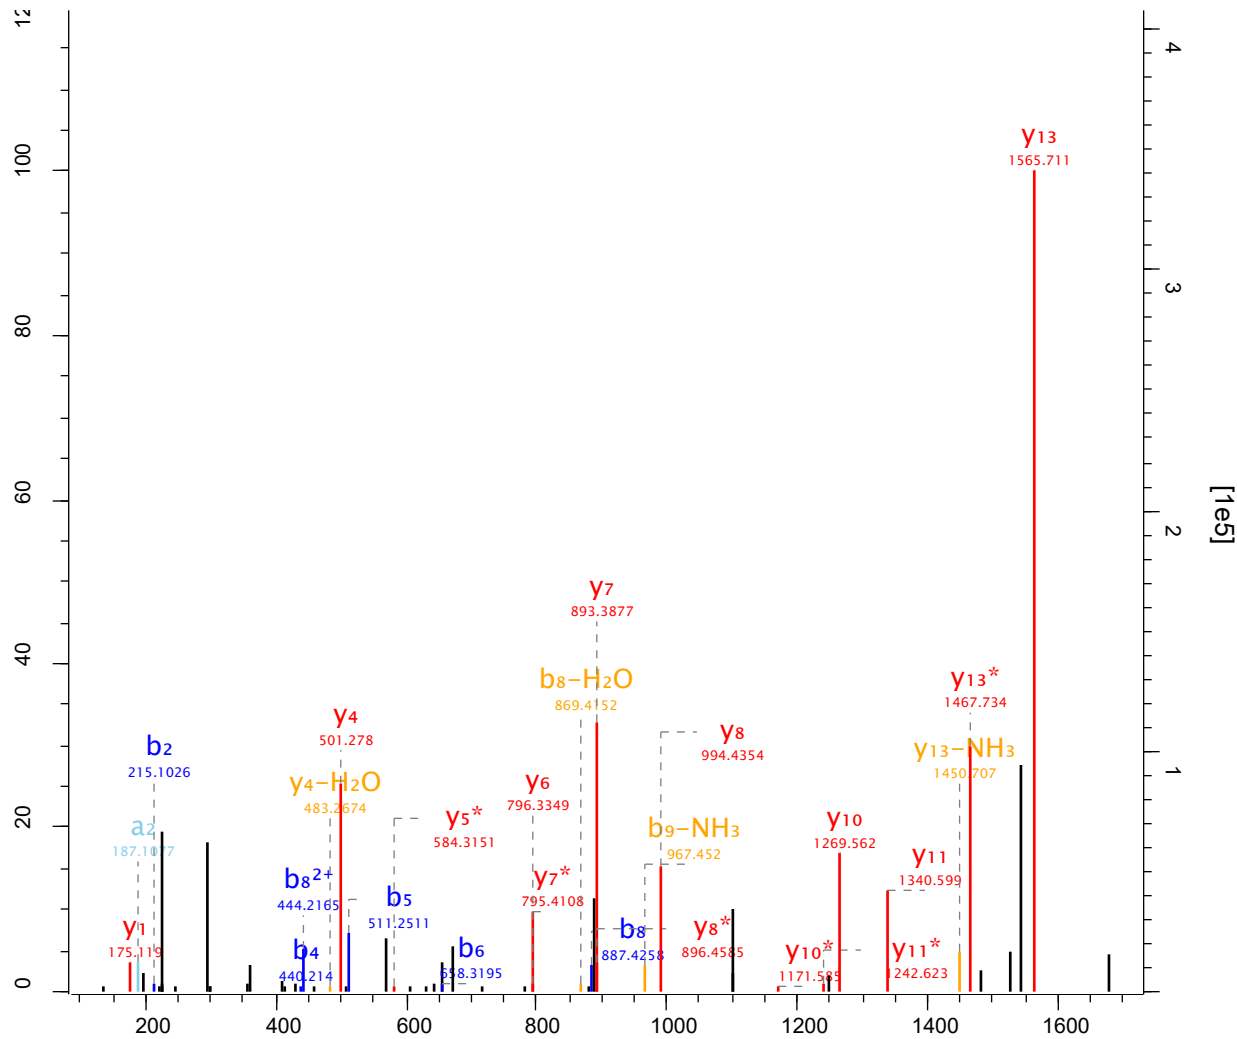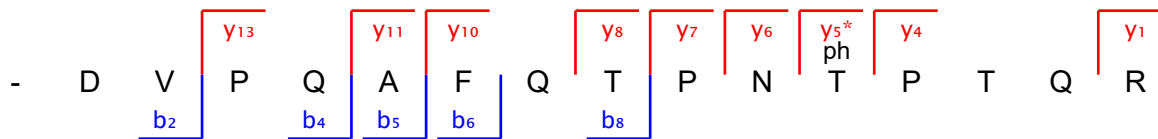

Raw file Scan Method Score m/z  
 sys\_05\_2 24919 FTMS; HCD 121.82 766.32

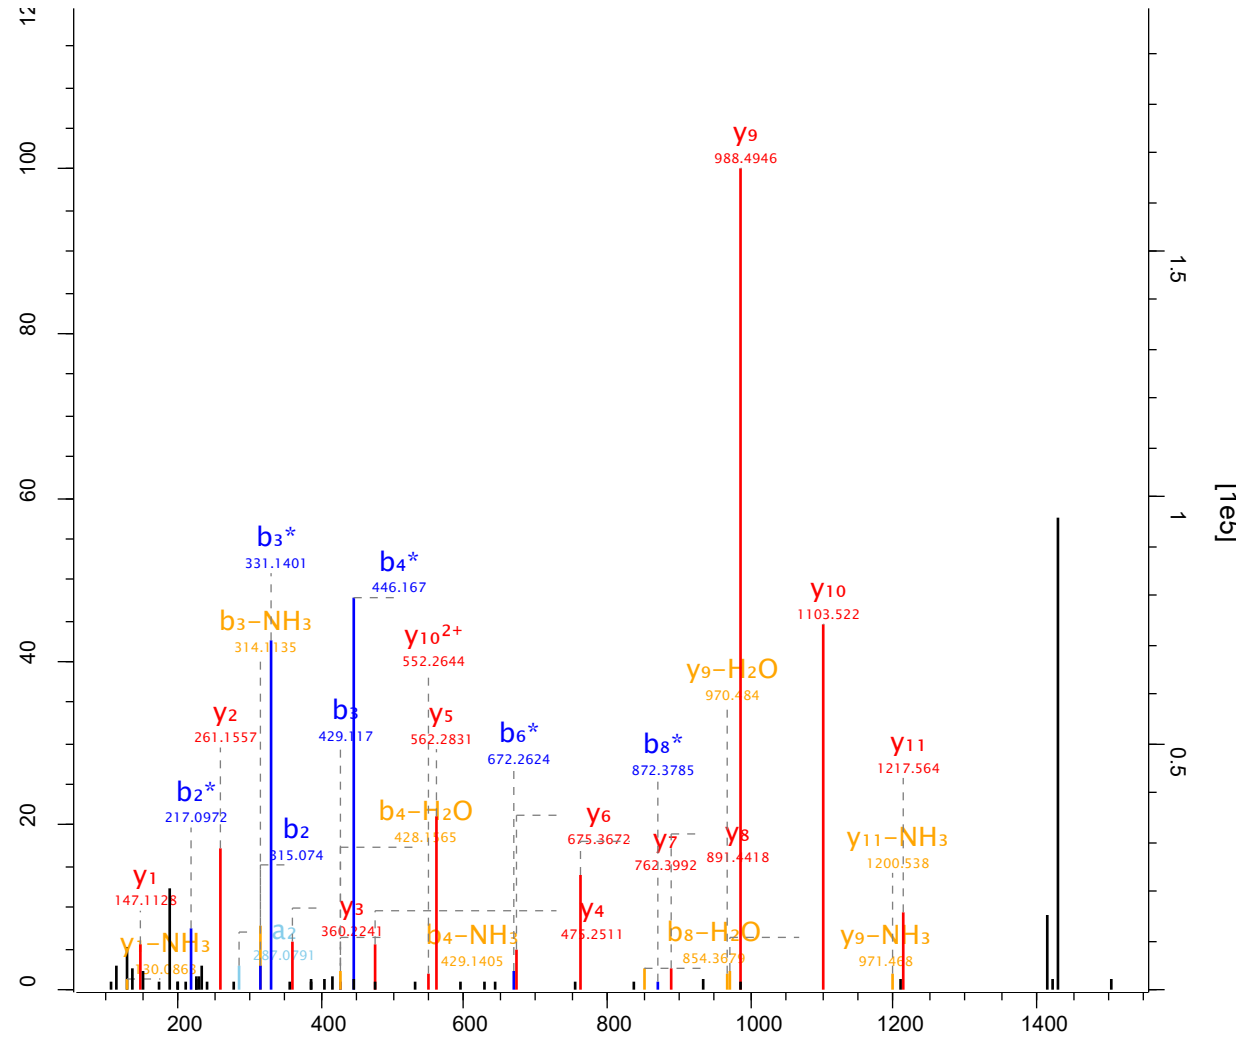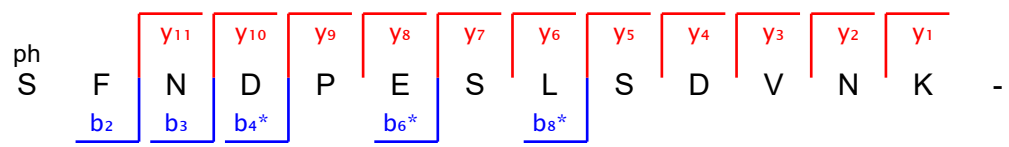



Raw file Scan Method Score m/z  
 sys\_05\_2 25152 FTMS; HCD 66.81 697.86

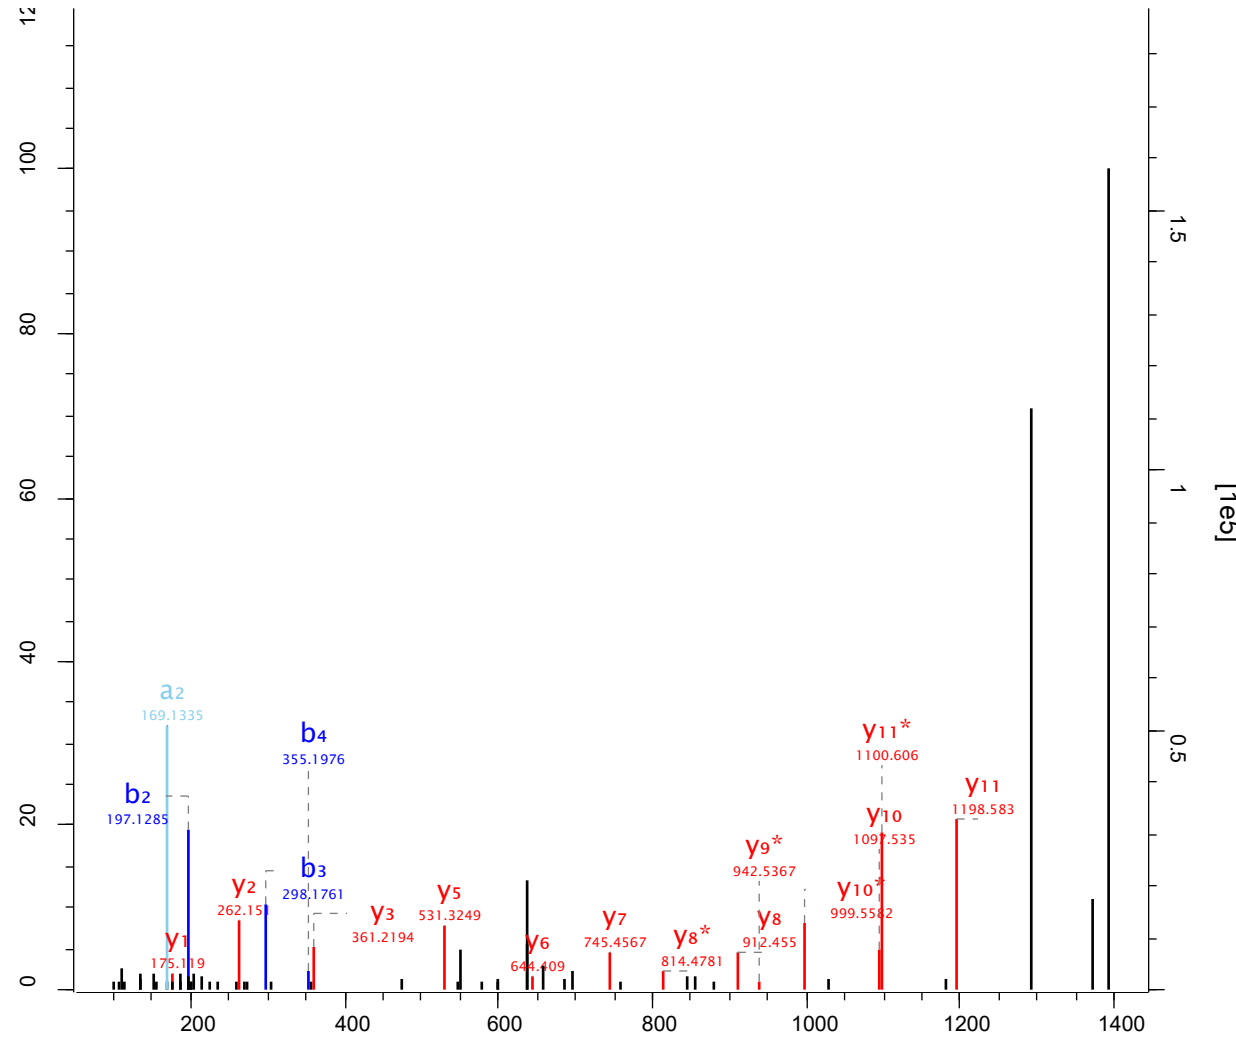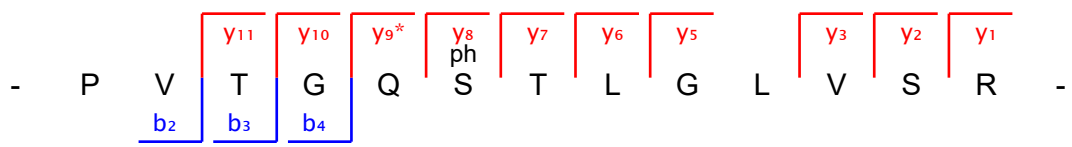

Raw file Scan Method Score m/z  
 sys\_05\_2 25263 FTMS; HCD 287.48 919.35

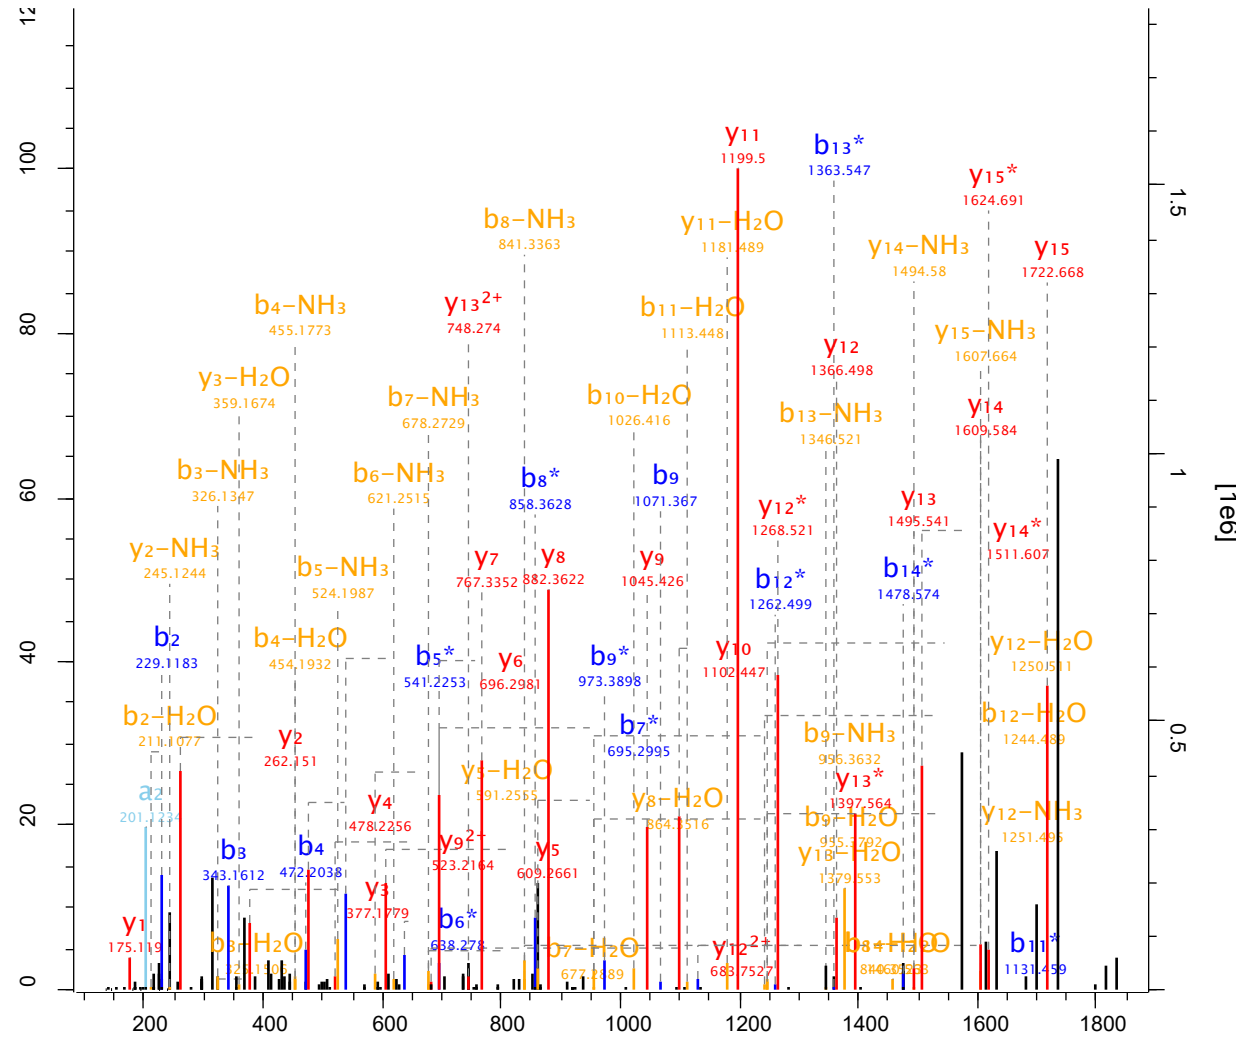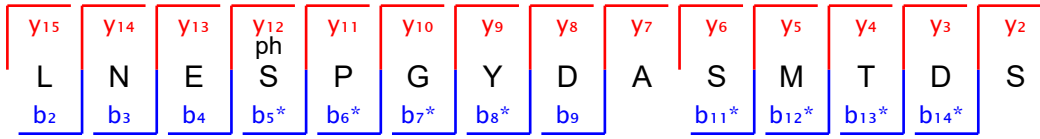

R -  
 y1

Raw file Scan Method Score m/z  
 sys\_05\_2 25469 FTMS; HCD 41.62 708.66

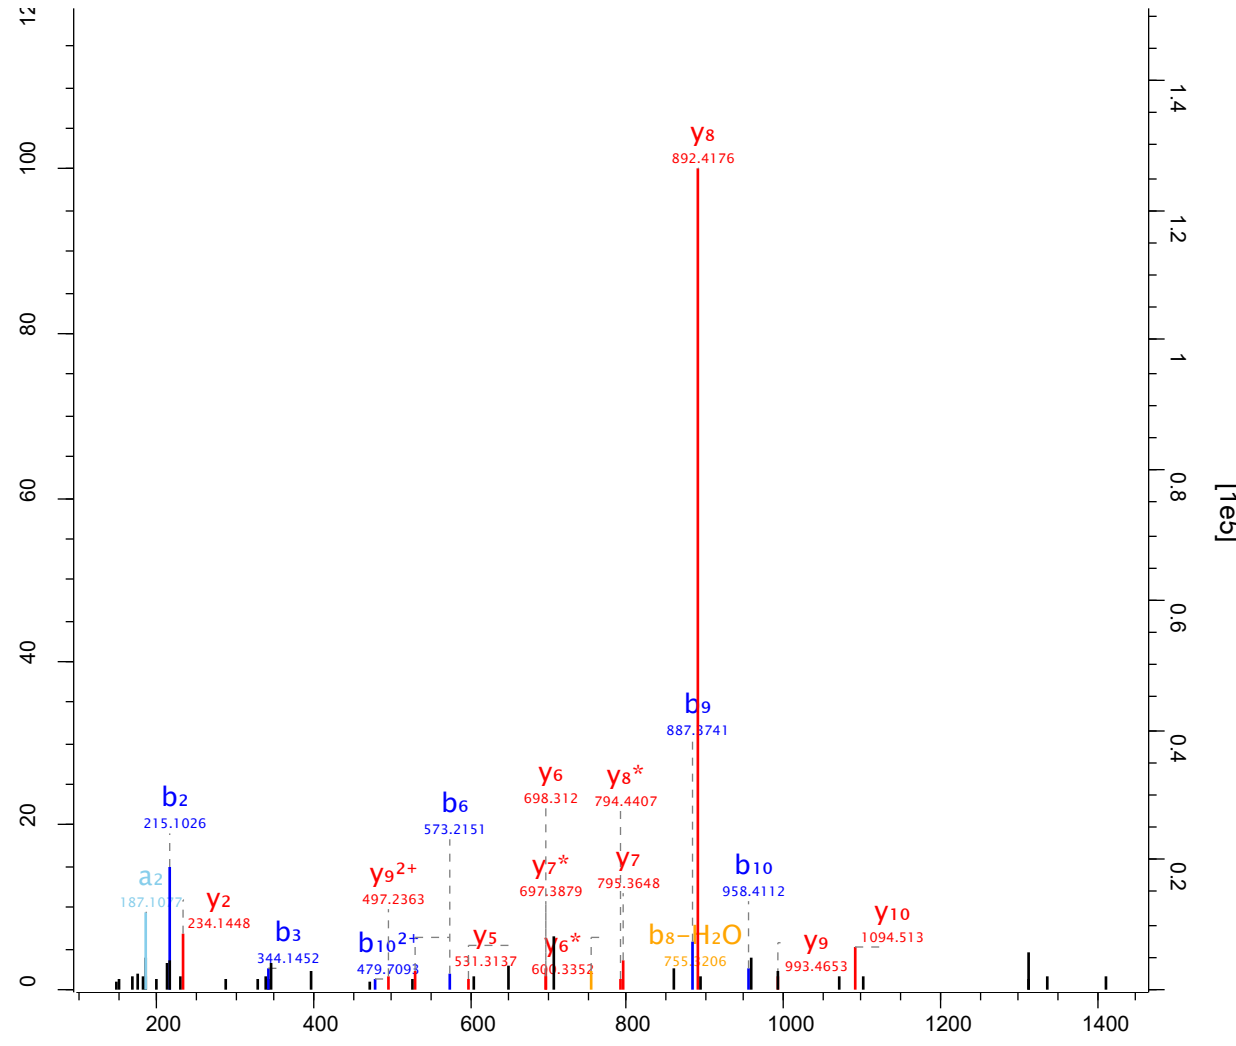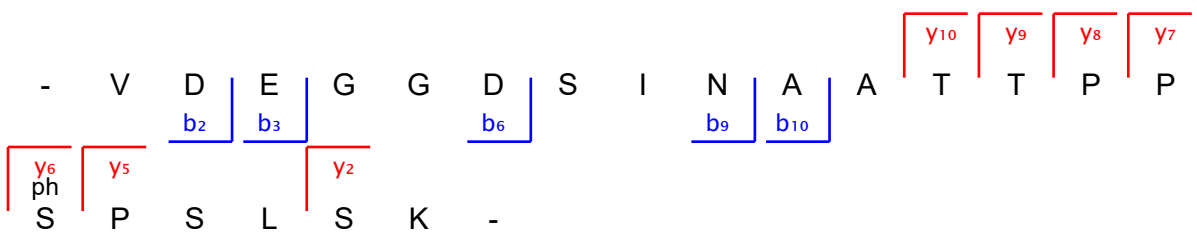

Raw file Scan Method Score m/z  
 sys\_05\_2 25476 FTMS; HCD 198.67 749.36

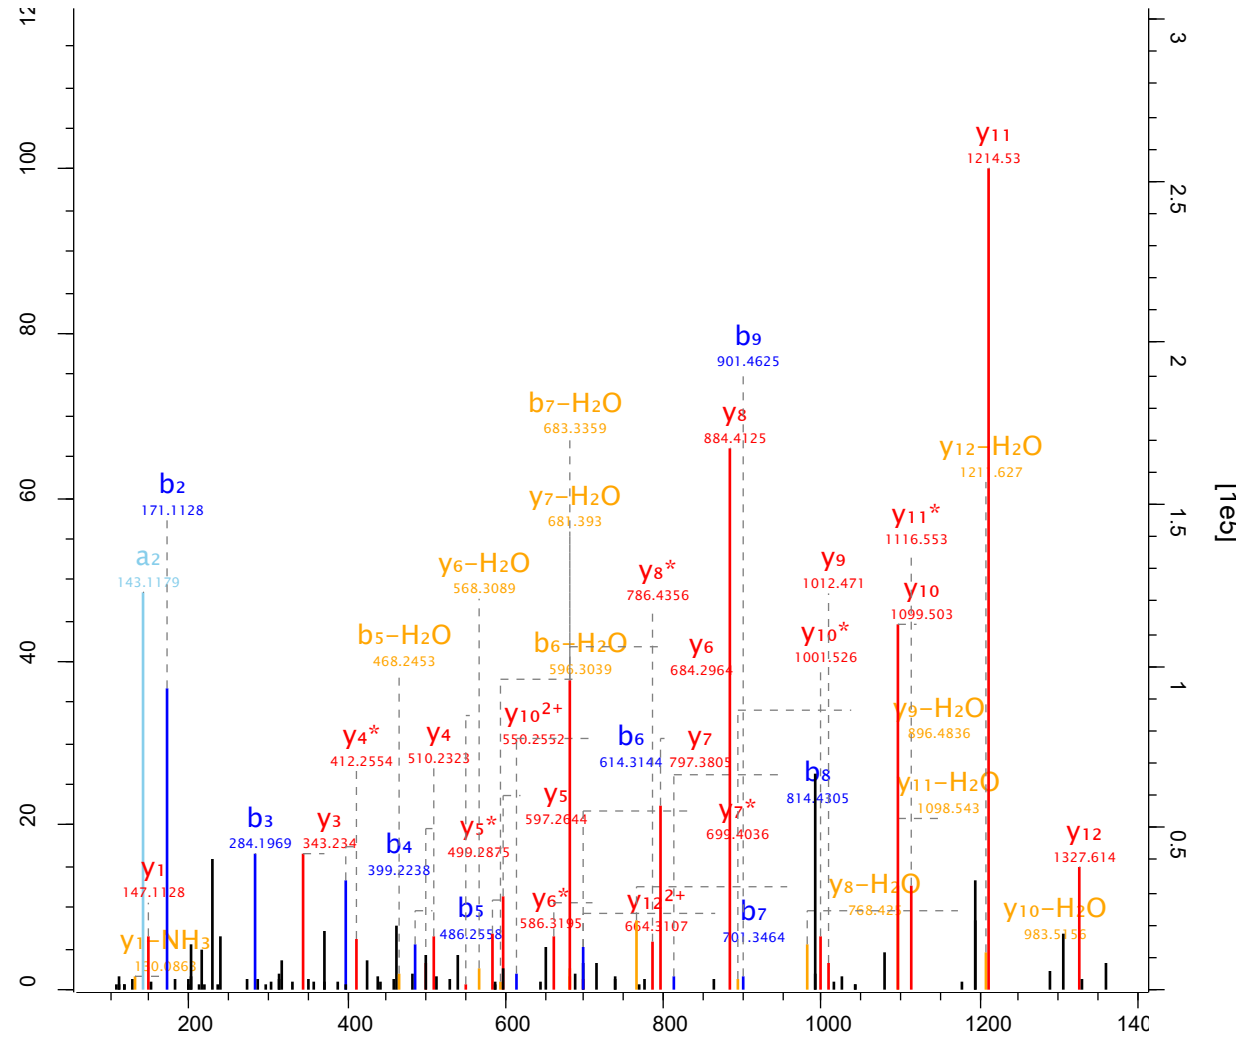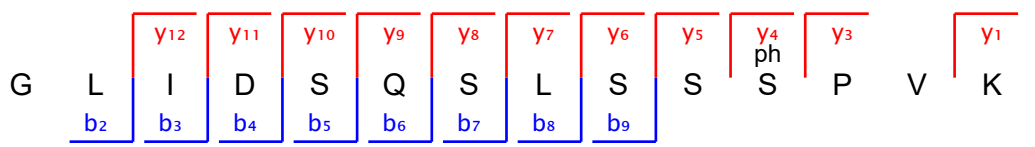

Raw file Scan Method Score m/z  
 sys\_05\_2 25726 FTMS; HCD 103.88 682.3

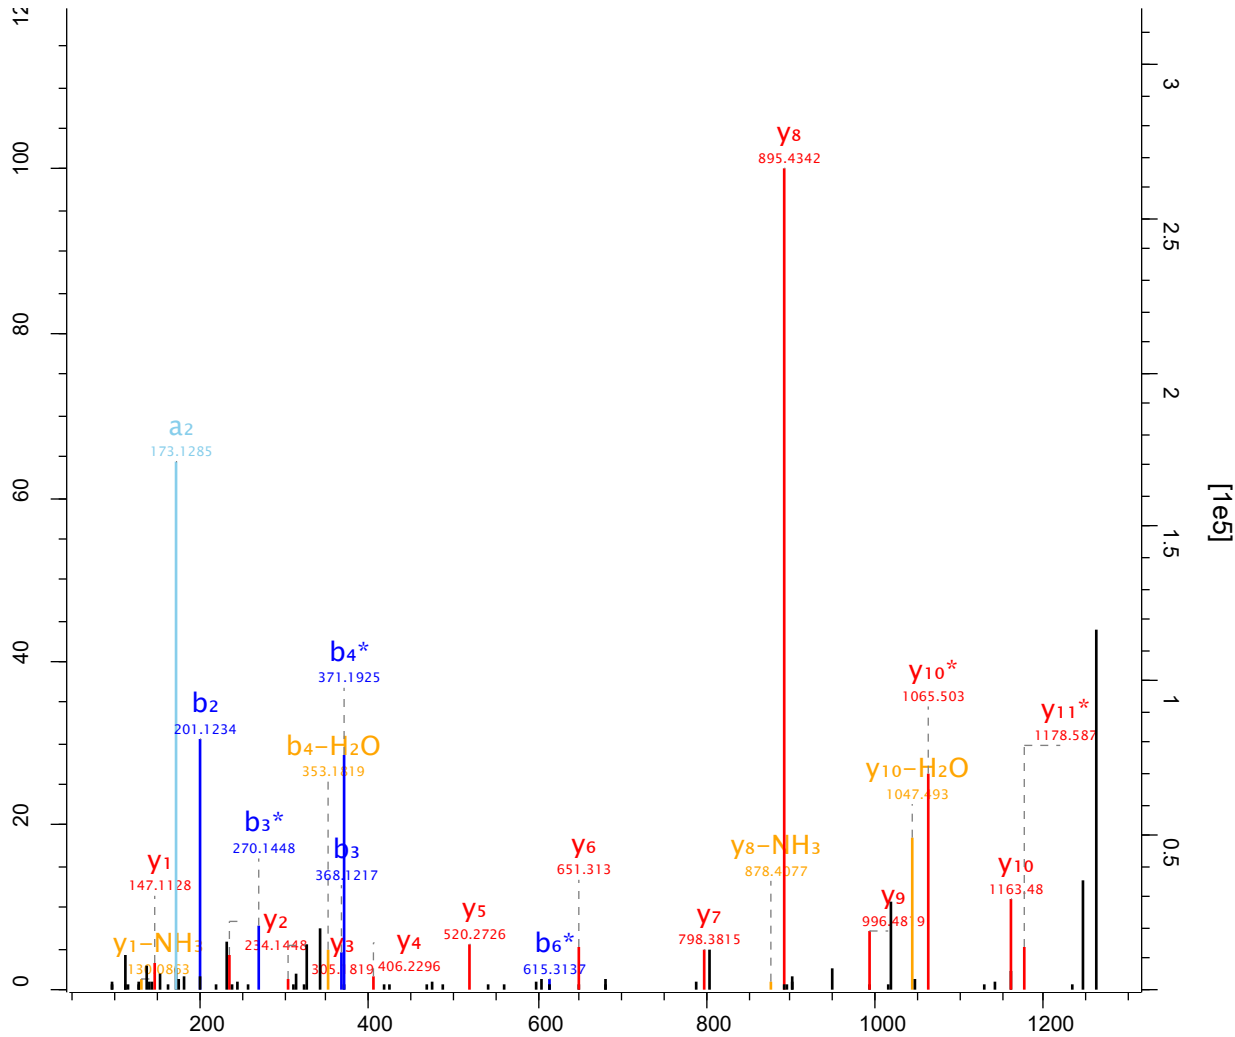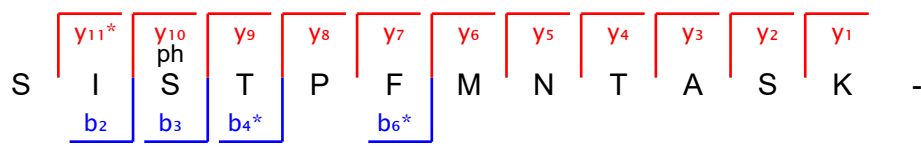

Raw file Scan Method Score m/z  
 sys\_05\_2 25902 FTMS; HCD 154.72 564.76

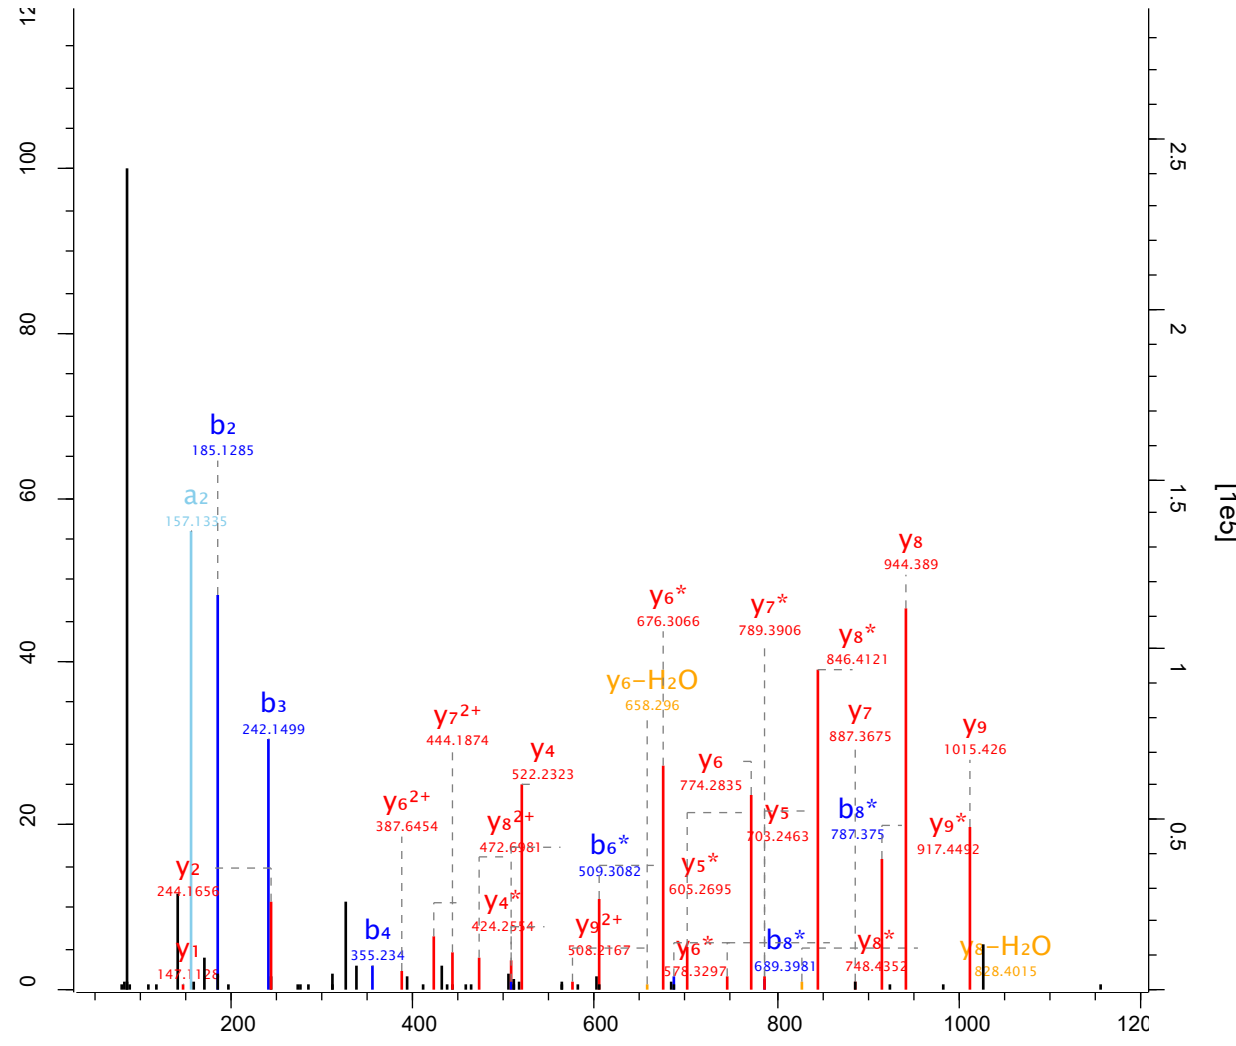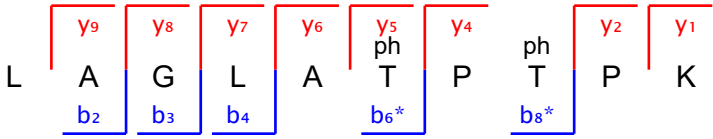

Raw file Scan Method Score m/z  
 sys\_05\_2 25944 FTMS; HCD 96.77 647.76

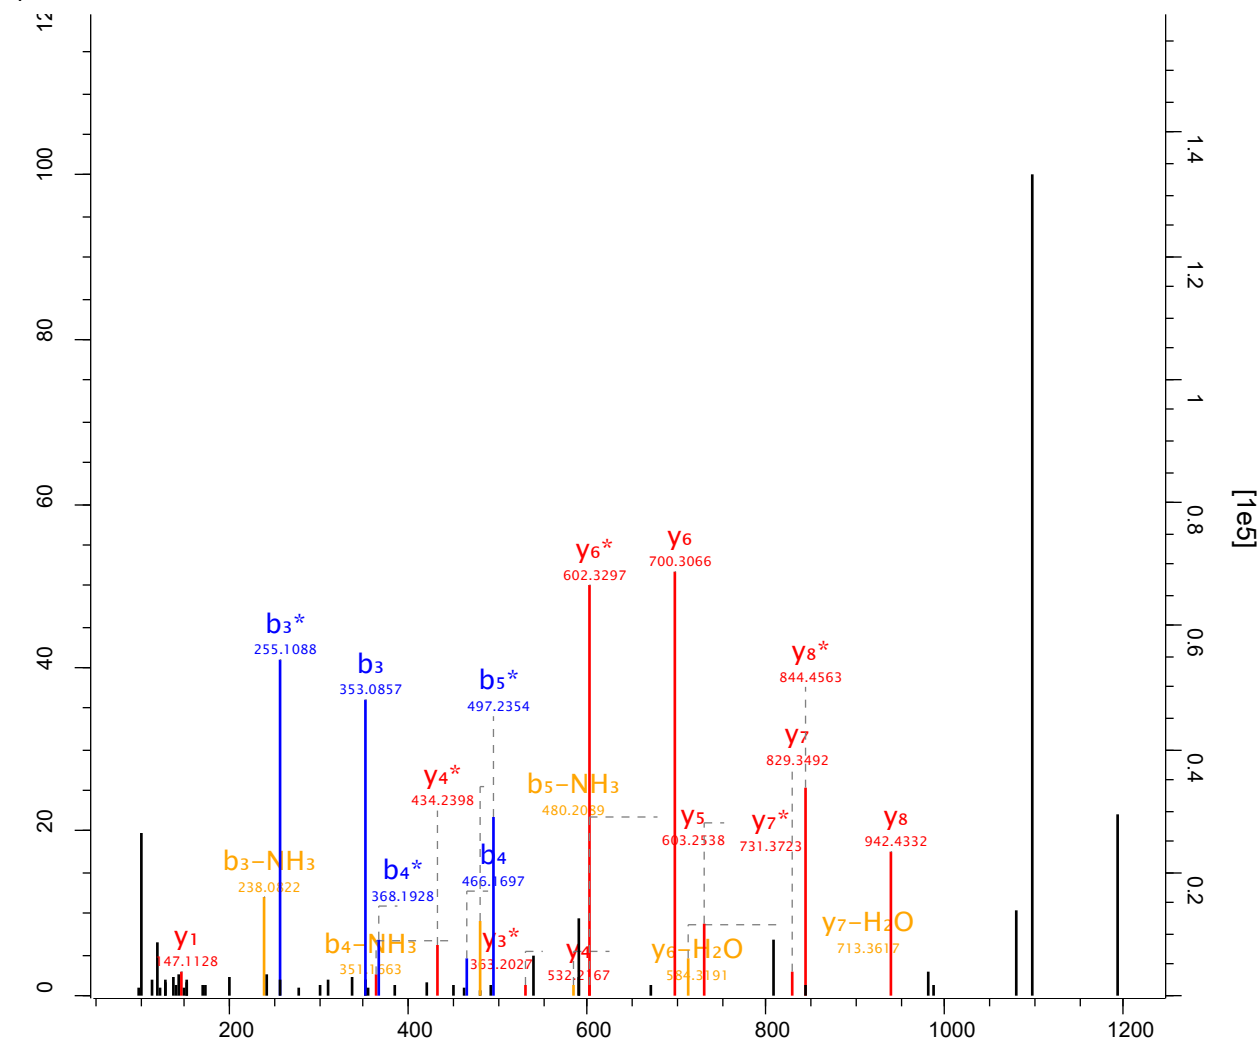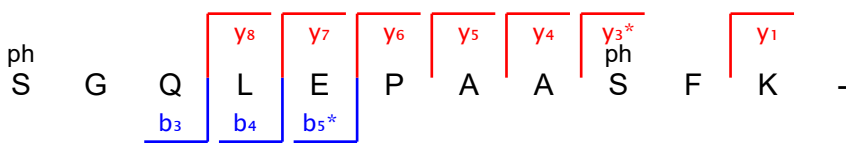

Raw file Scan Method Score m/z  
 sys\_05\_2 26024 FTMS; HCD 67.58 967.93

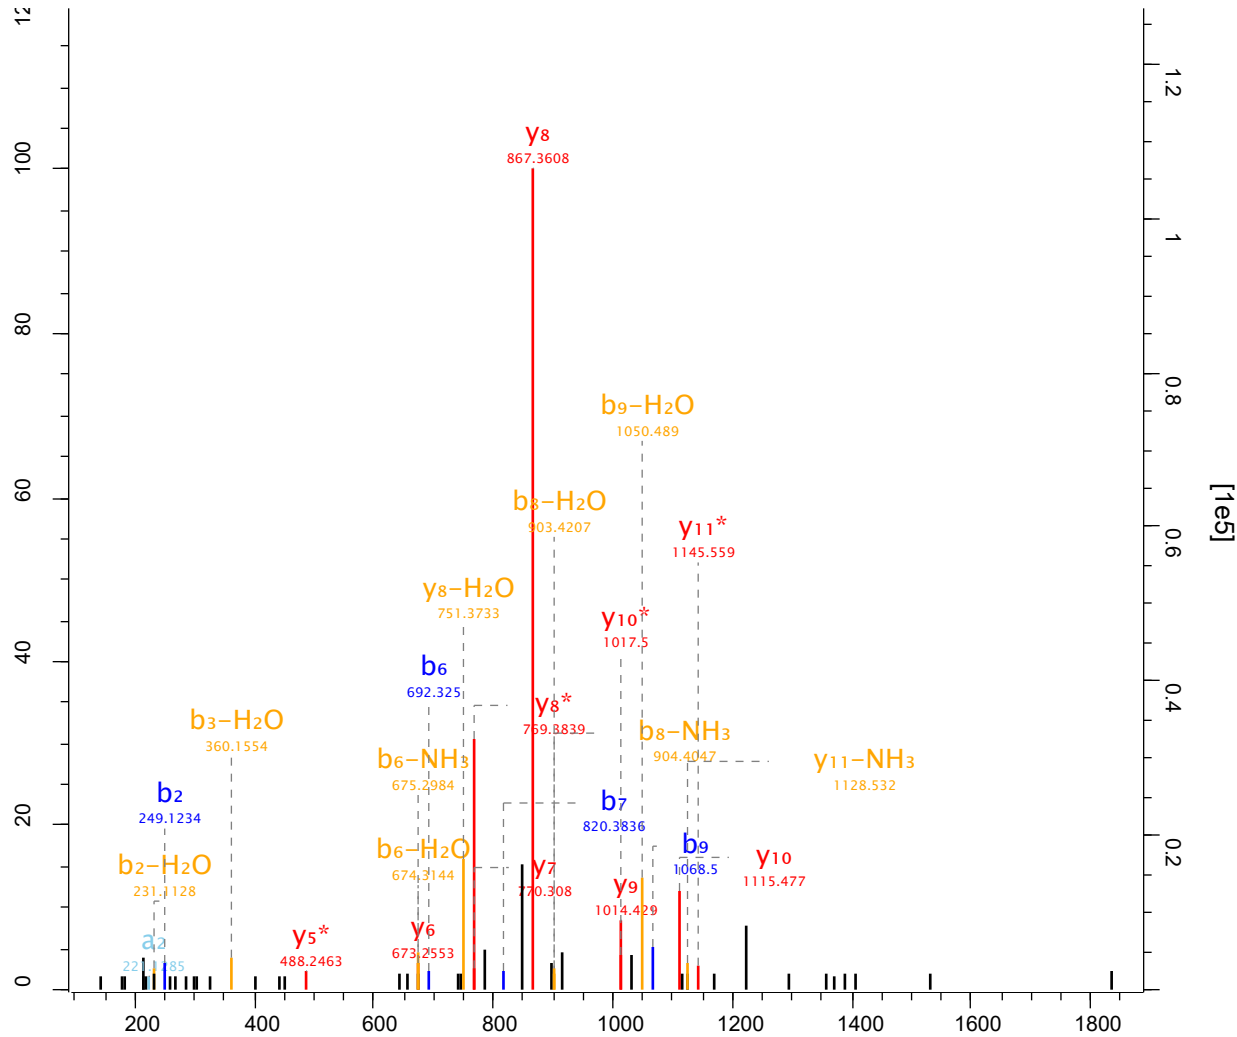

- F T E S N L Q T F P P S S Q  
 b2 b6 b7 b9 y11\* y10 y9 y8 y7 y6 y5\*  
 ph

G K -



Raw file Scan Method Score m/z  
 sys\_05\_2 26246 FTMS; HCD 251.02 555.78

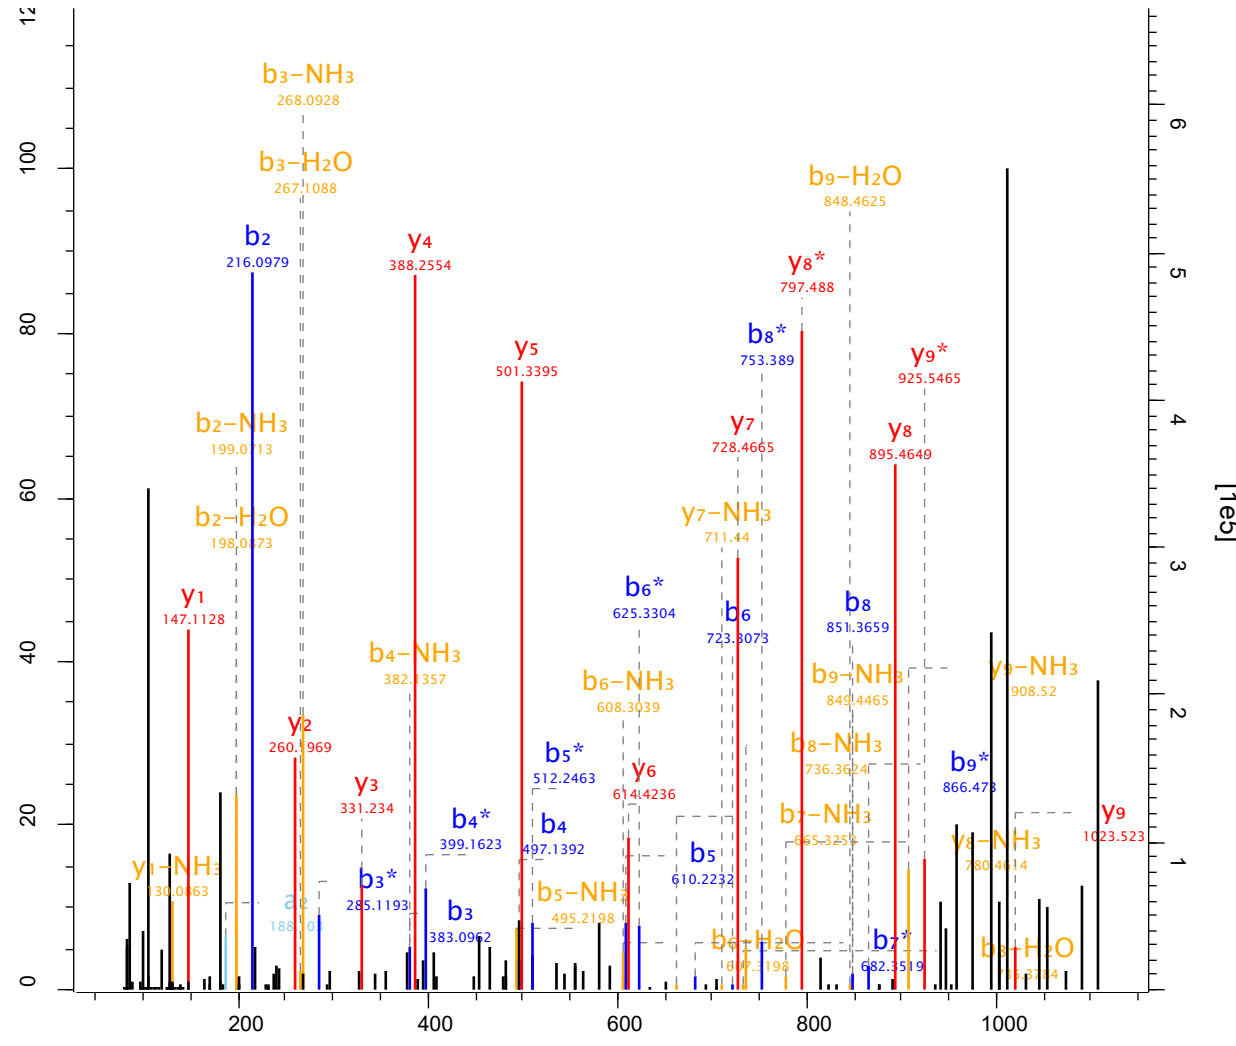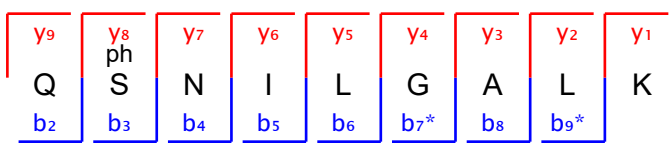

Raw file Scan Method Score m/z  
 sys\_05\_2 26258 FTMS; HCD 247.5 832.36

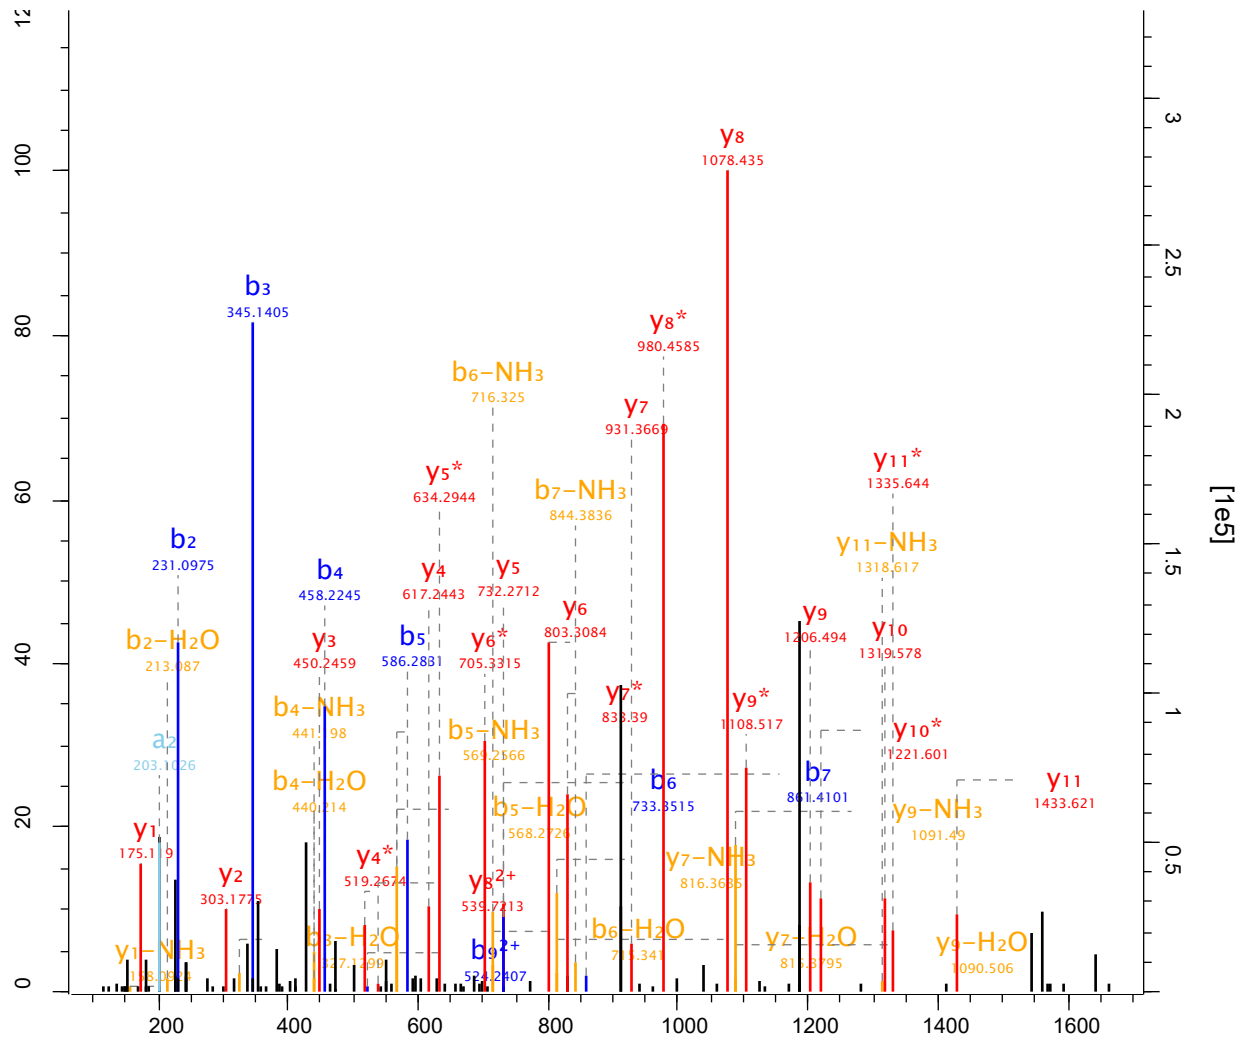

[1e5]

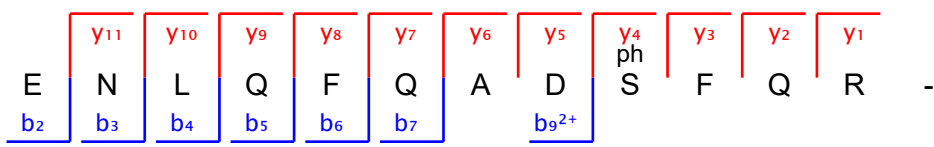

Raw file Scan Method Score m/z  
 sys\_05\_2 26297 FTMS; HCD 127.37 526.2

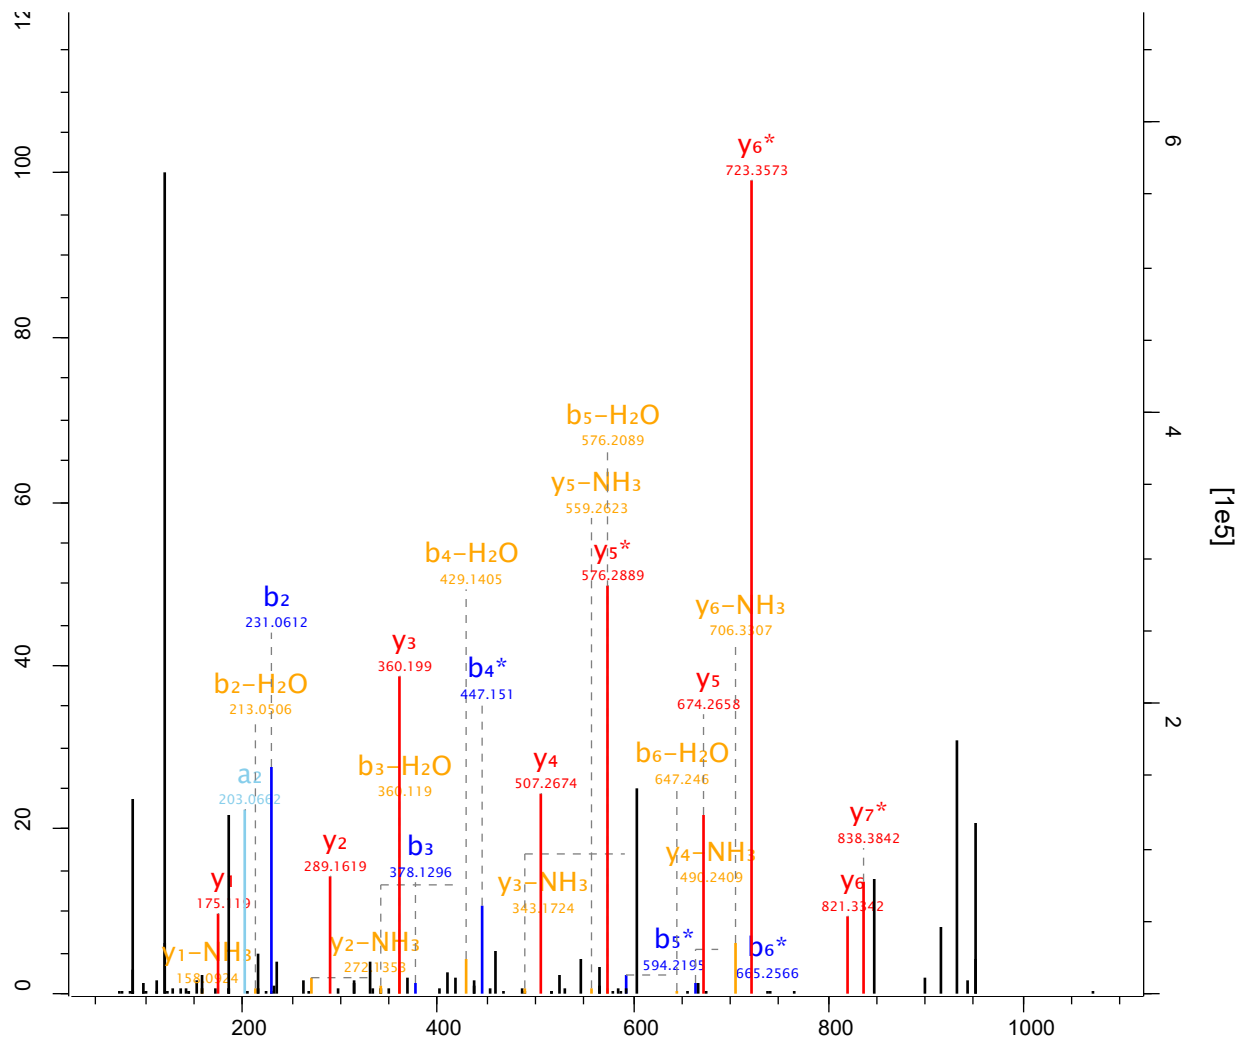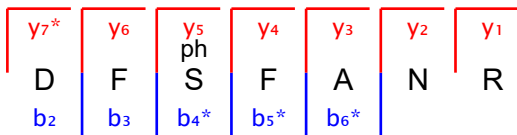

Raw file Scan Method Score m/z  
 sys\_05\_2 26304 FTMS; HCD 180.86 889.84

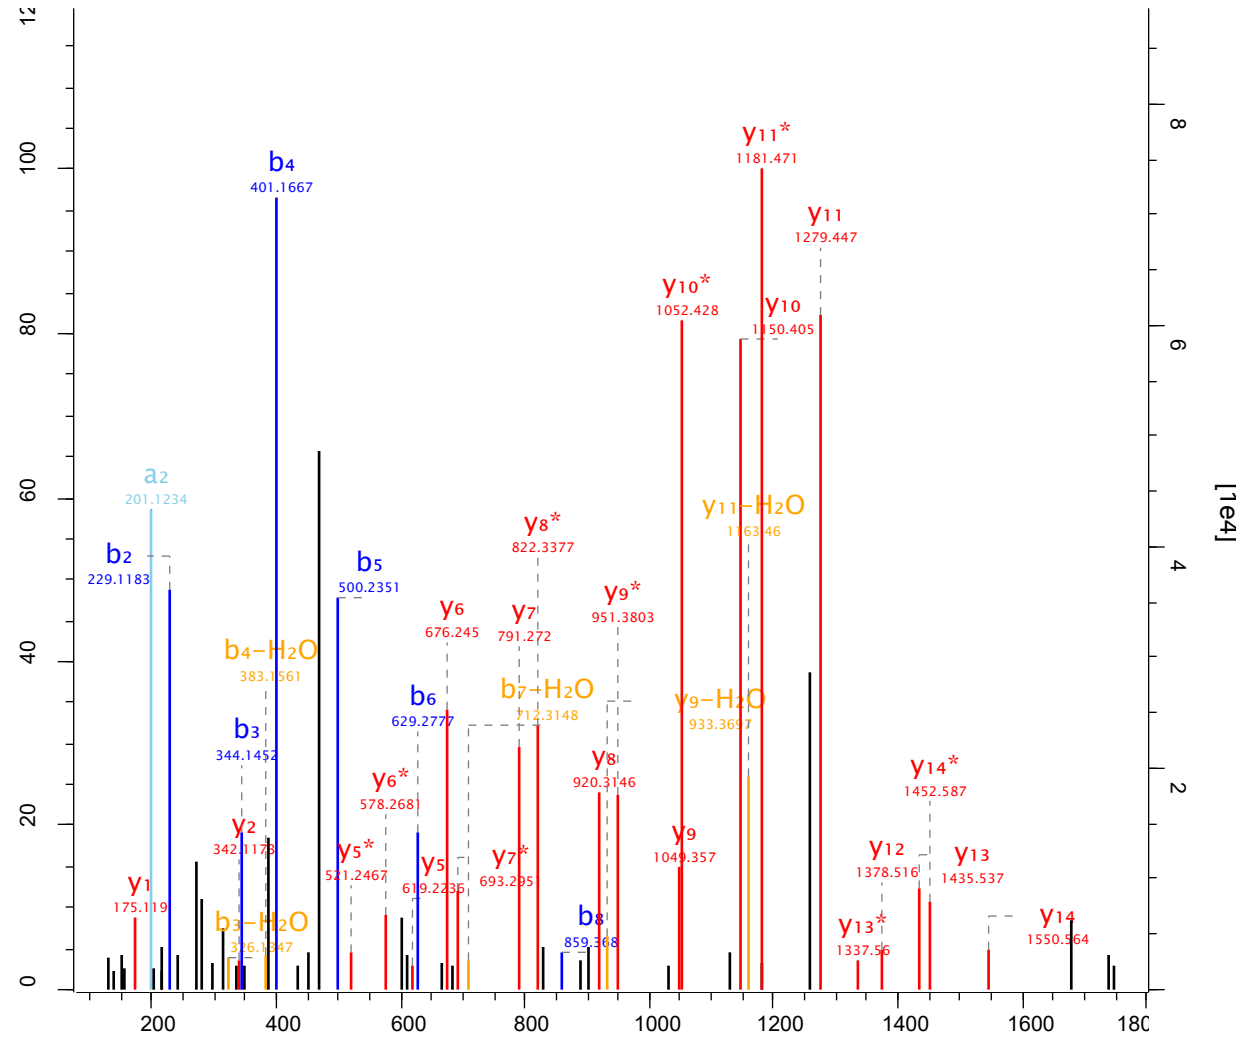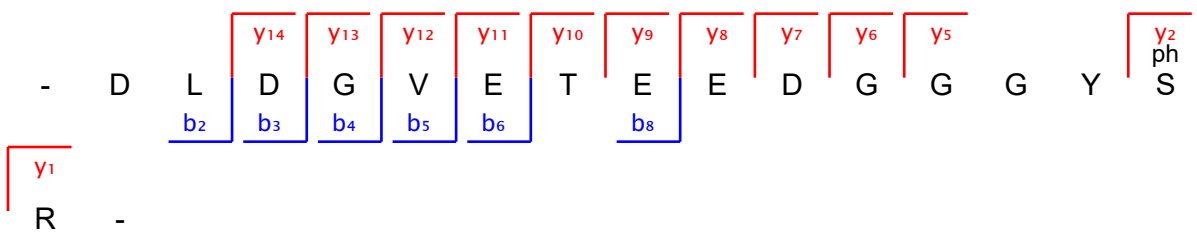

Raw file Scan Method Score m/z  
 sys\_05\_2 26667 FTMS; HCD 42 583.75

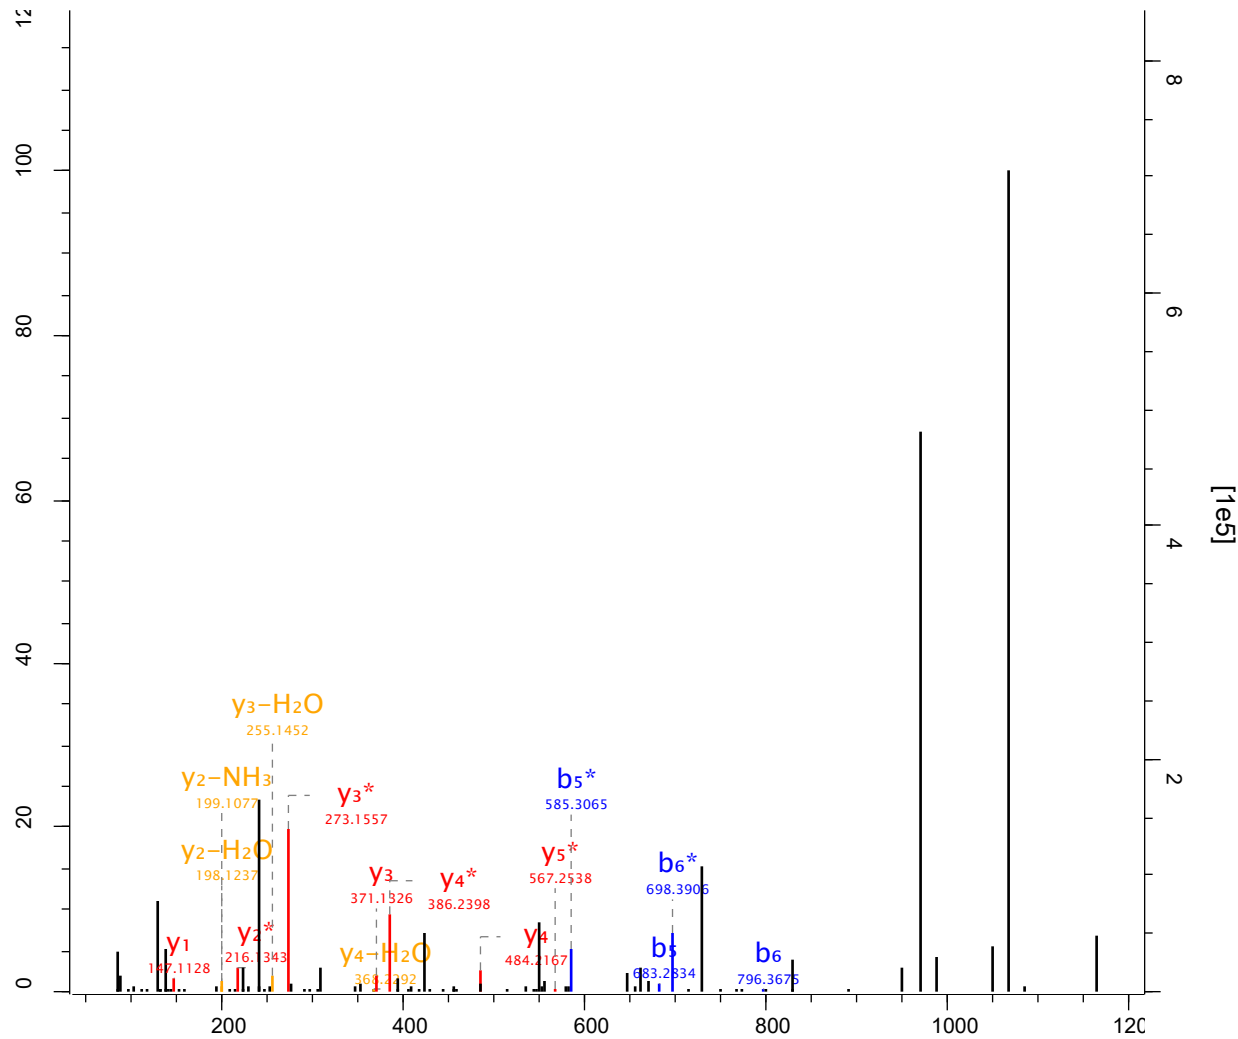

- I Q L M ox y5\*  
ph  
T y4  
I y3  
G y2\*  
ph  
S y1  
K -

b5 b6

Raw file Scan Method Score m/z  
 sys\_05\_2 26767 FTMS; HCD 97.64 478.71

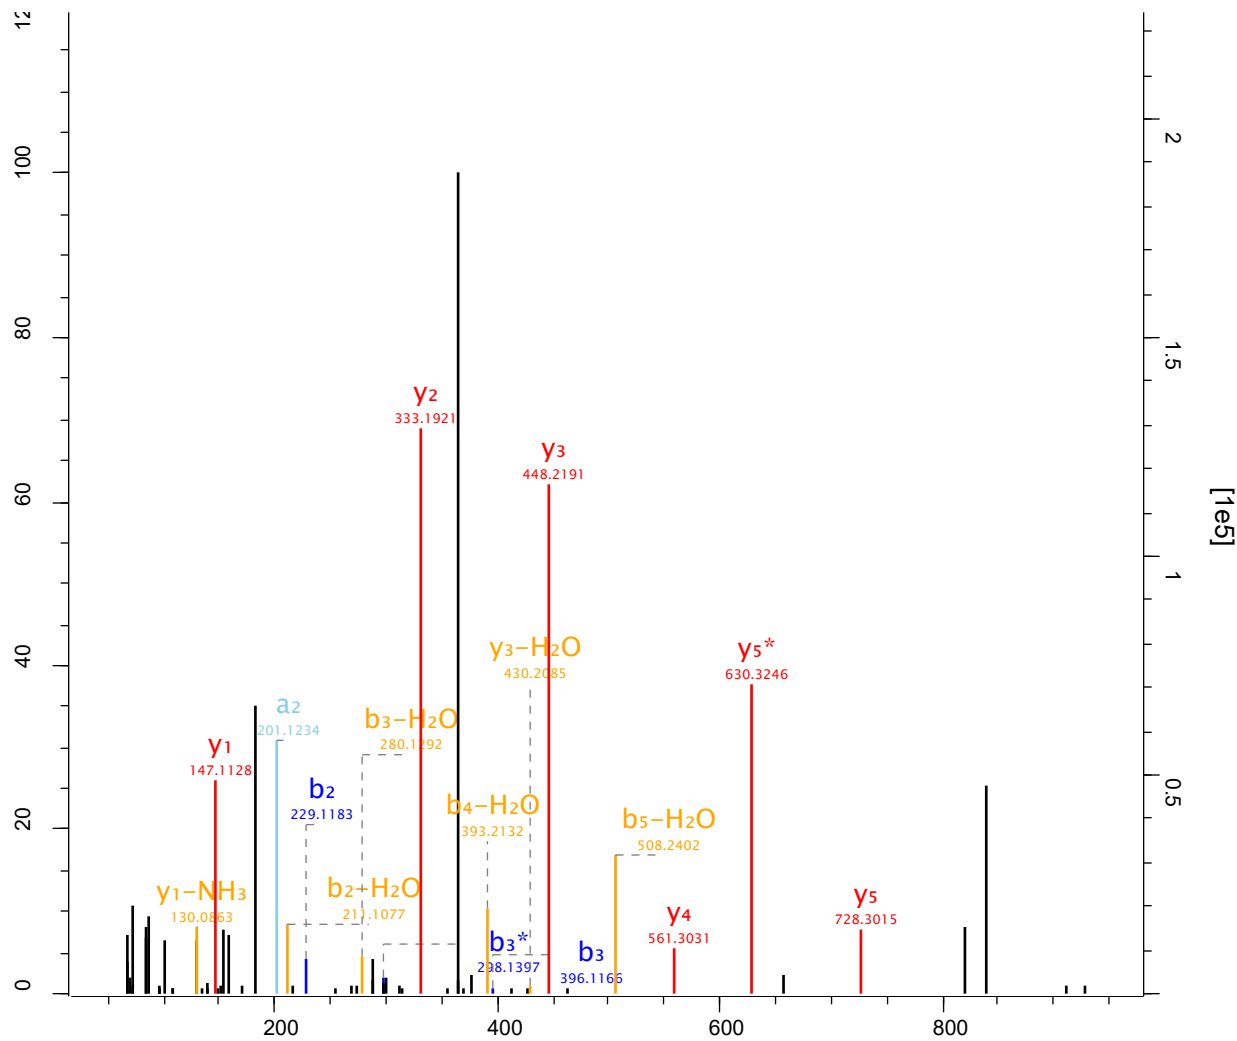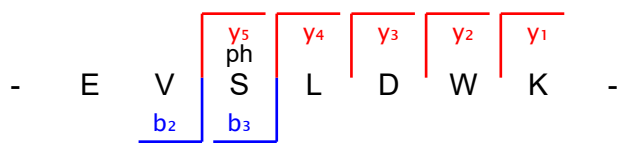

Raw file Scan Method Score m/z  
 sys\_05\_2 26806 FTMS; HCD 40.28 671.83

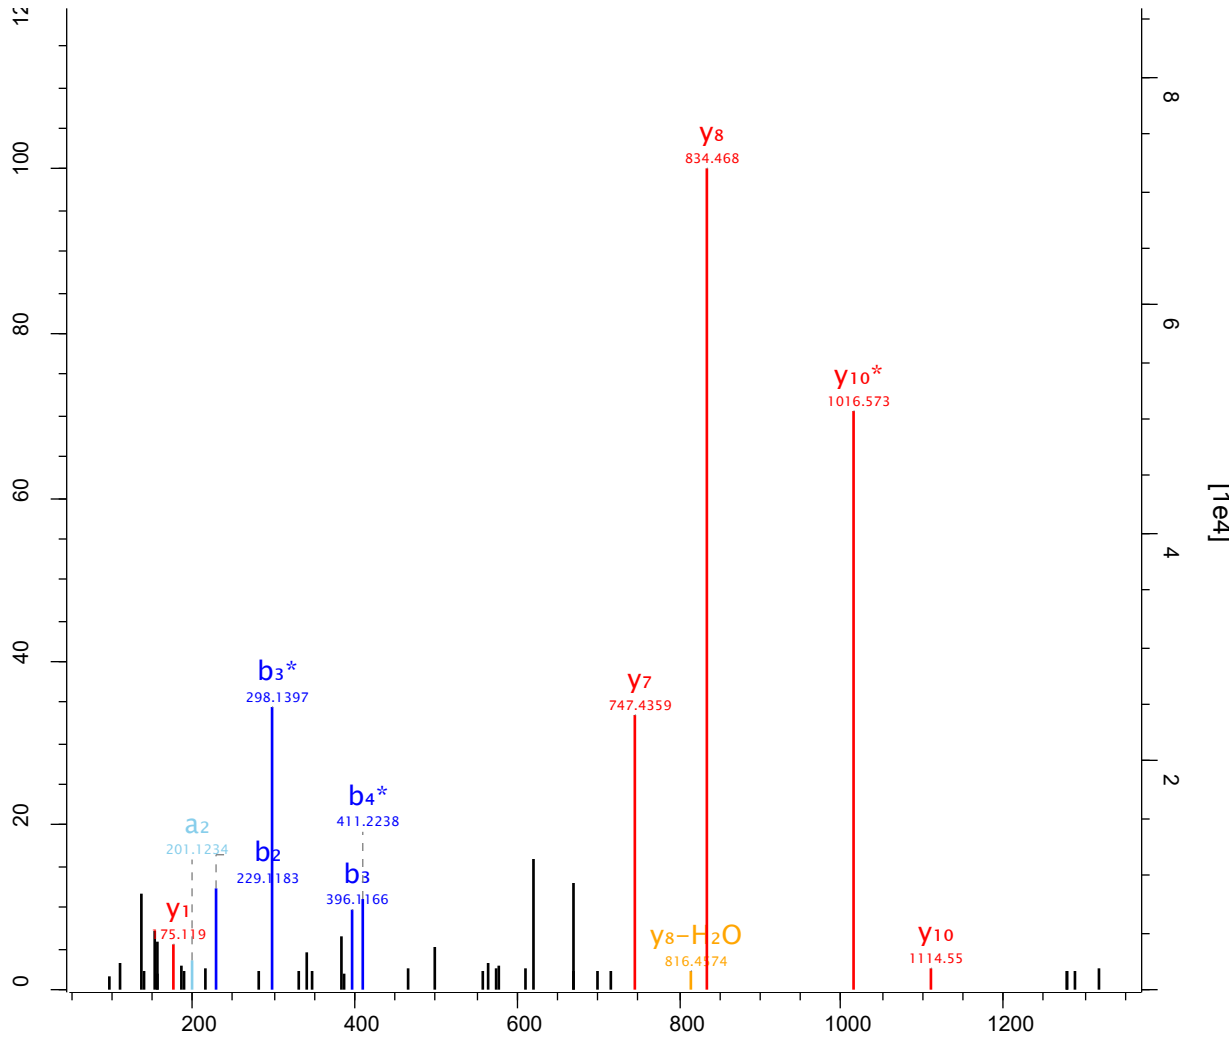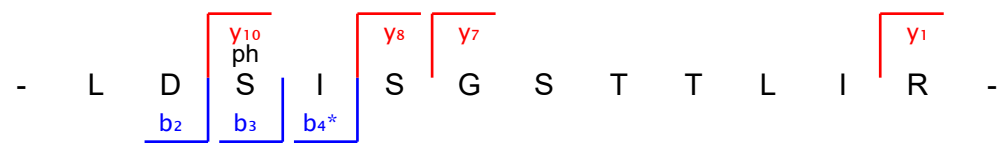

Raw file Scan Method Score m/z  
 sys\_05\_2 26856 FTMS; HCD 106.38 752.78

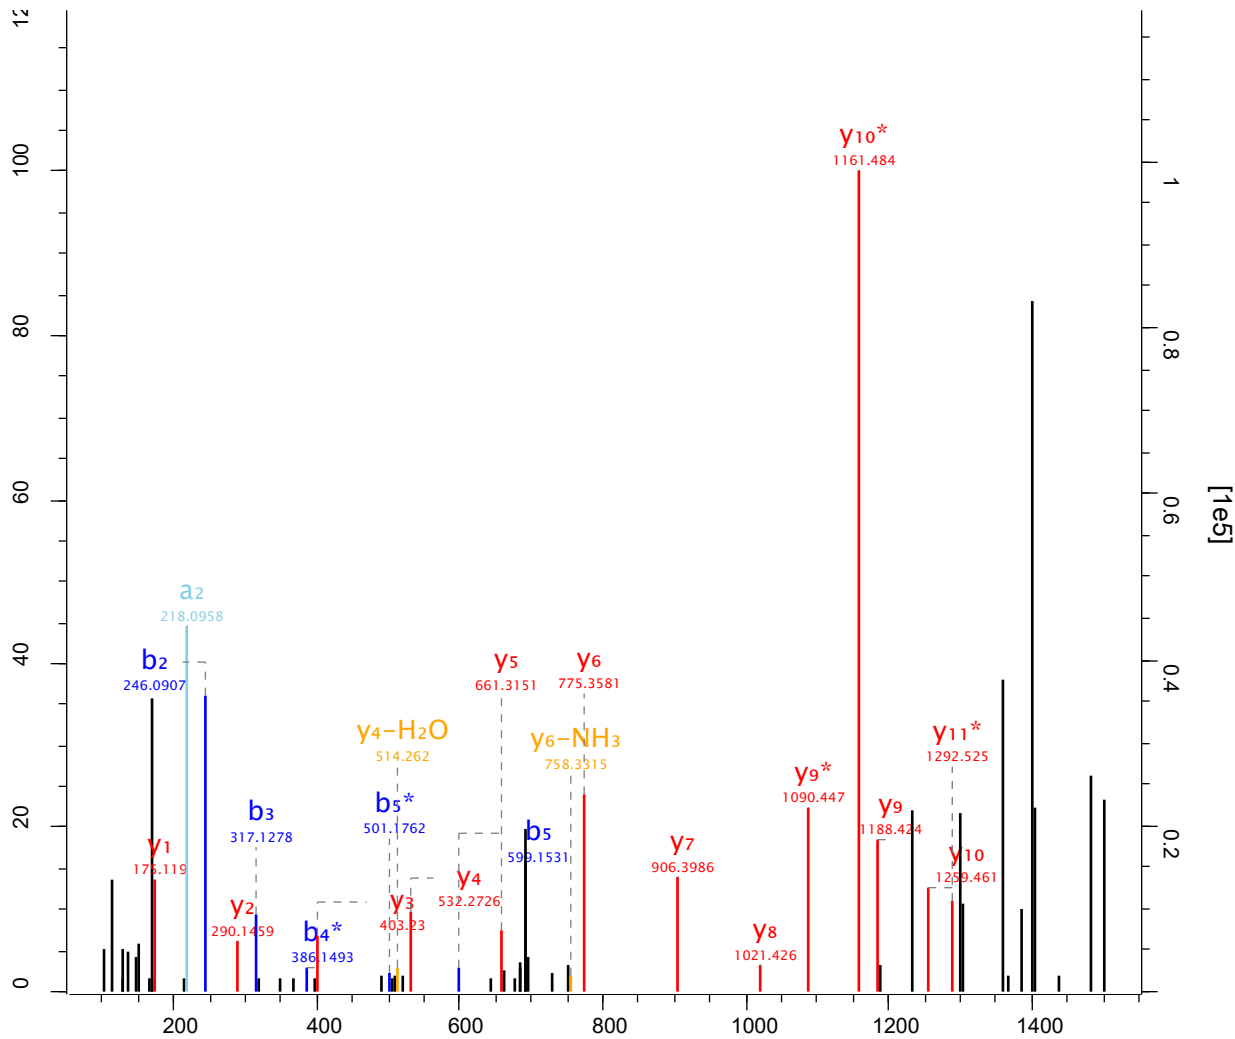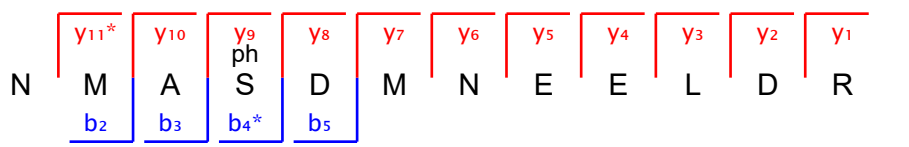



Raw file Scan Method Score m/z  
 sys\_05\_2 26898 FTMS; HCD 118.54 871.4

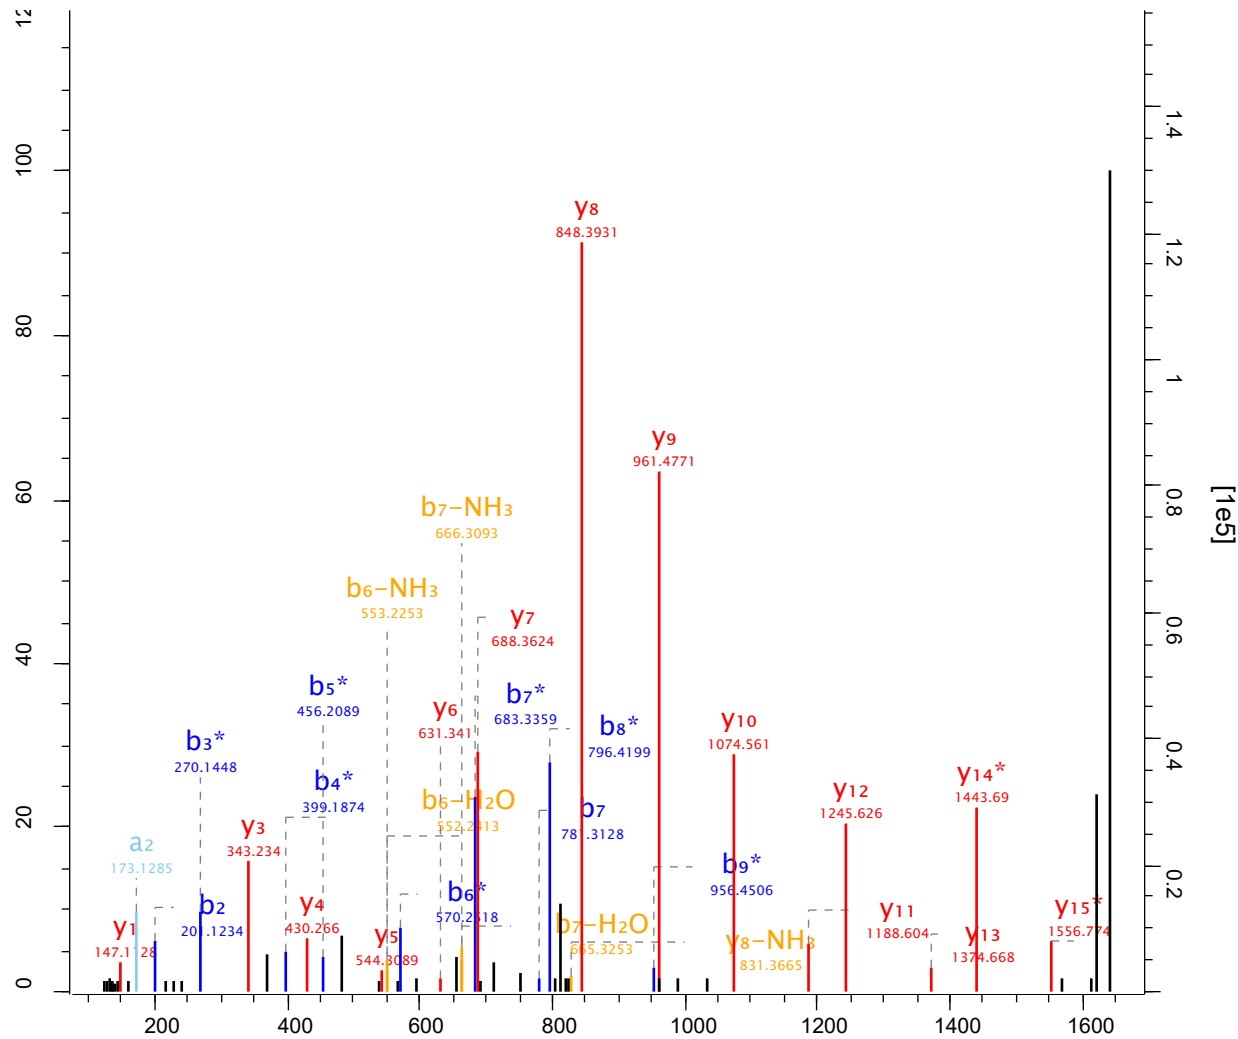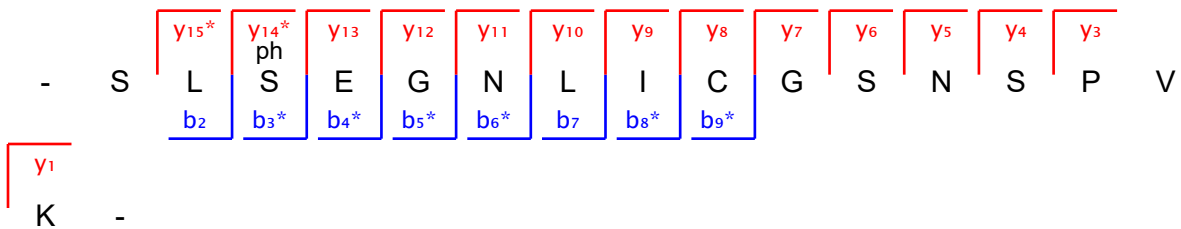

Raw file Scan Method Score m/z  
 sys\_05\_2 27043 FTMS; HCD 204.09 1151.45

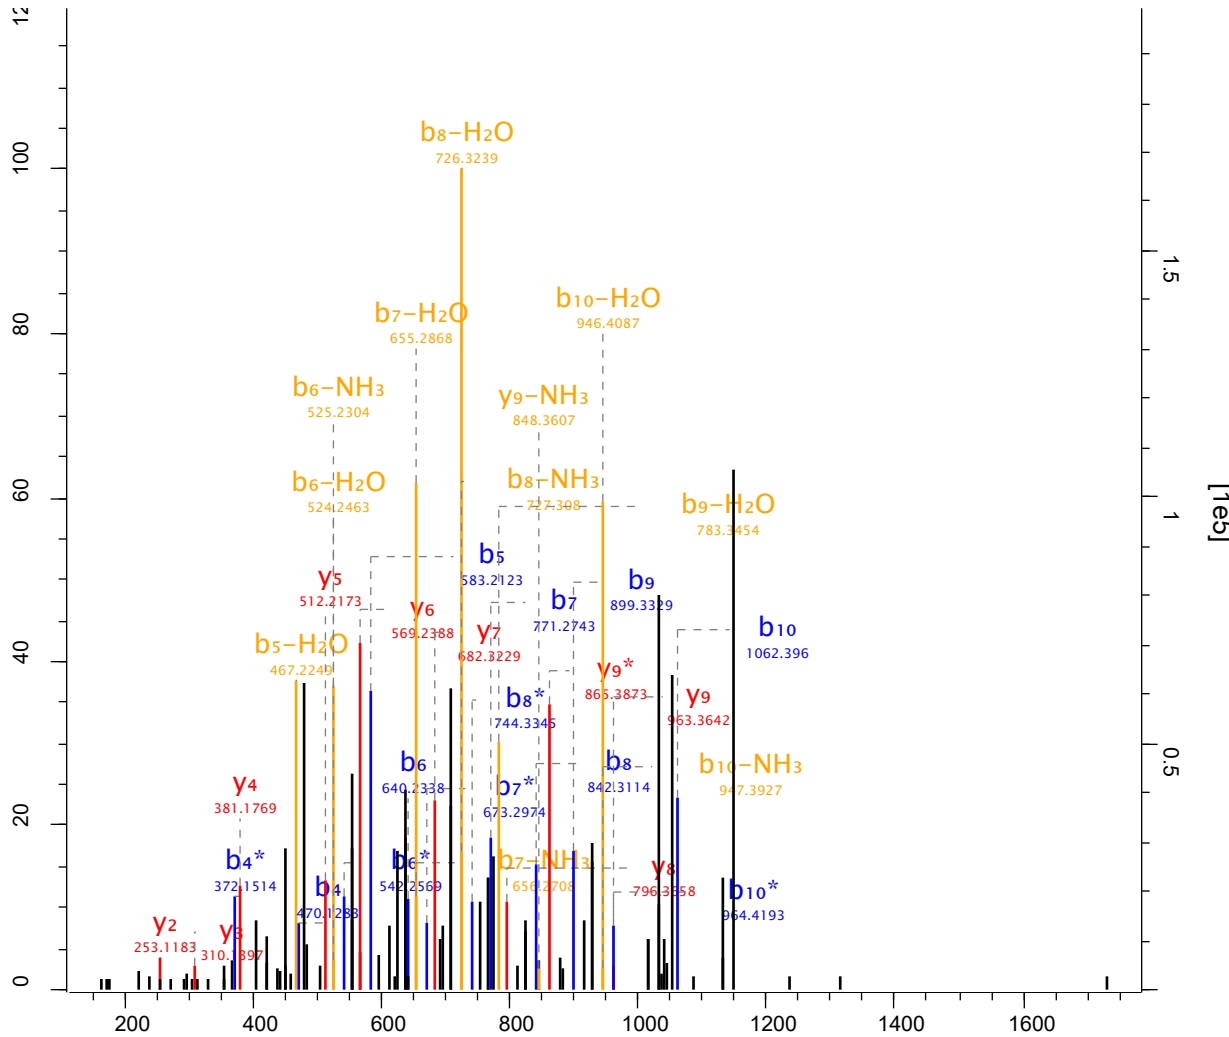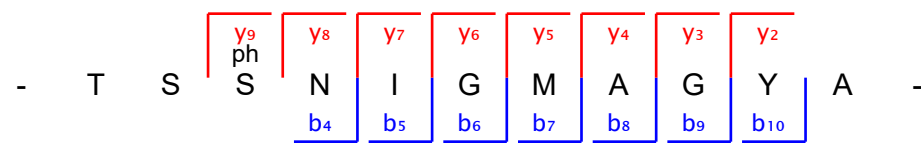

Raw file Scan Method Score m/z  
 sys\_05\_2 27224 FTMS; HCD 199.41 934.92

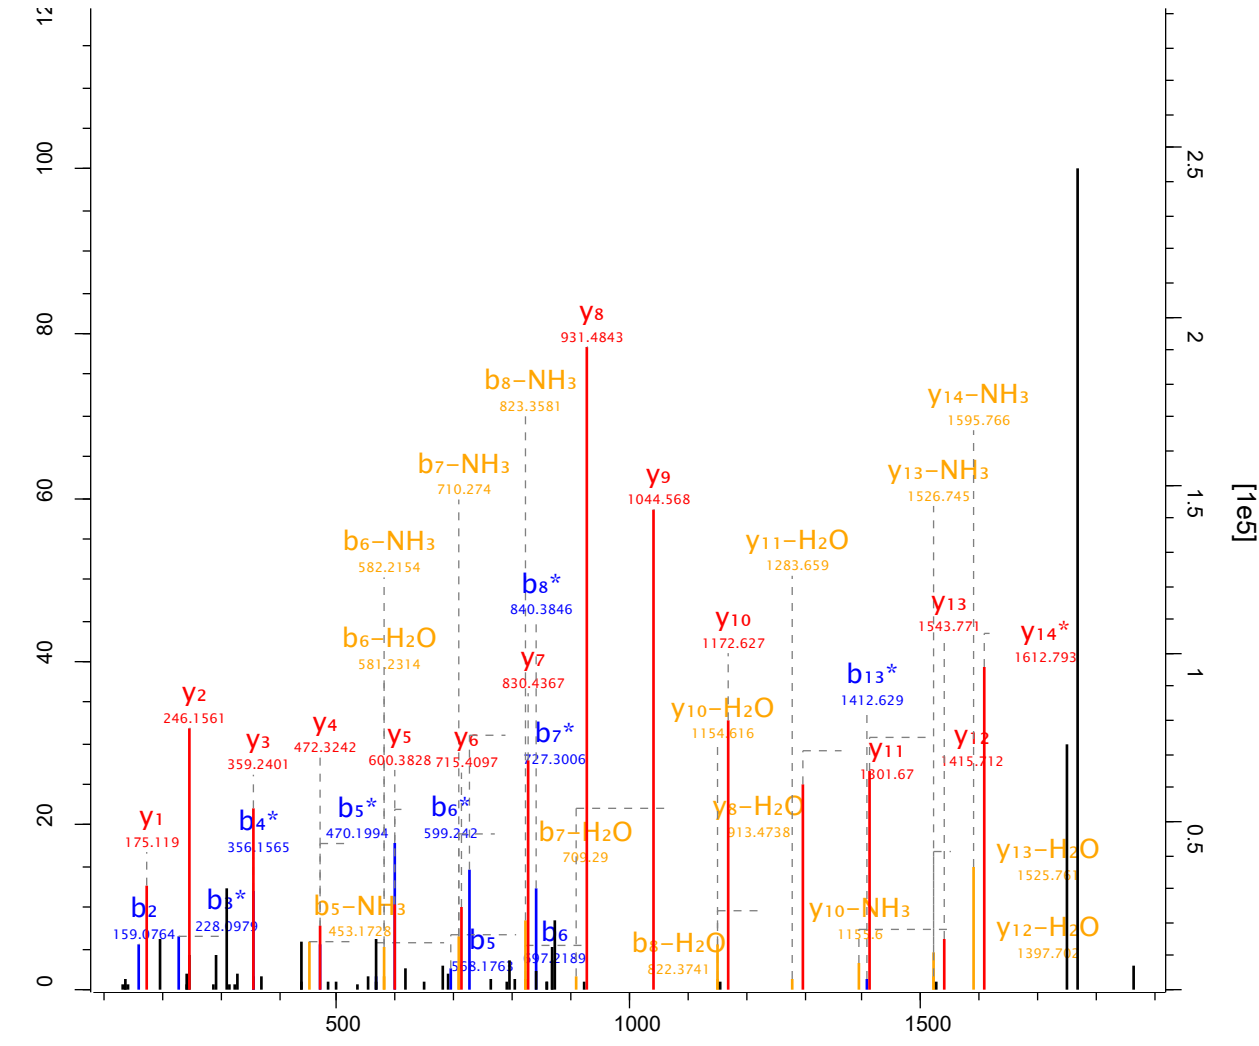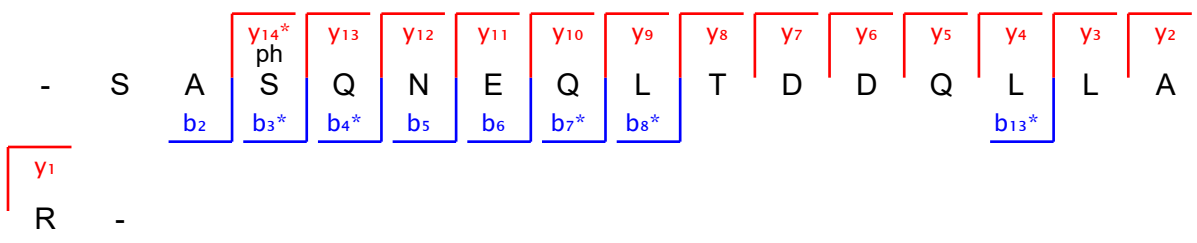

Raw file Scan Method Score m/z  
 sys\_05\_2 27318 FTMS; HCD 220.06 635.79

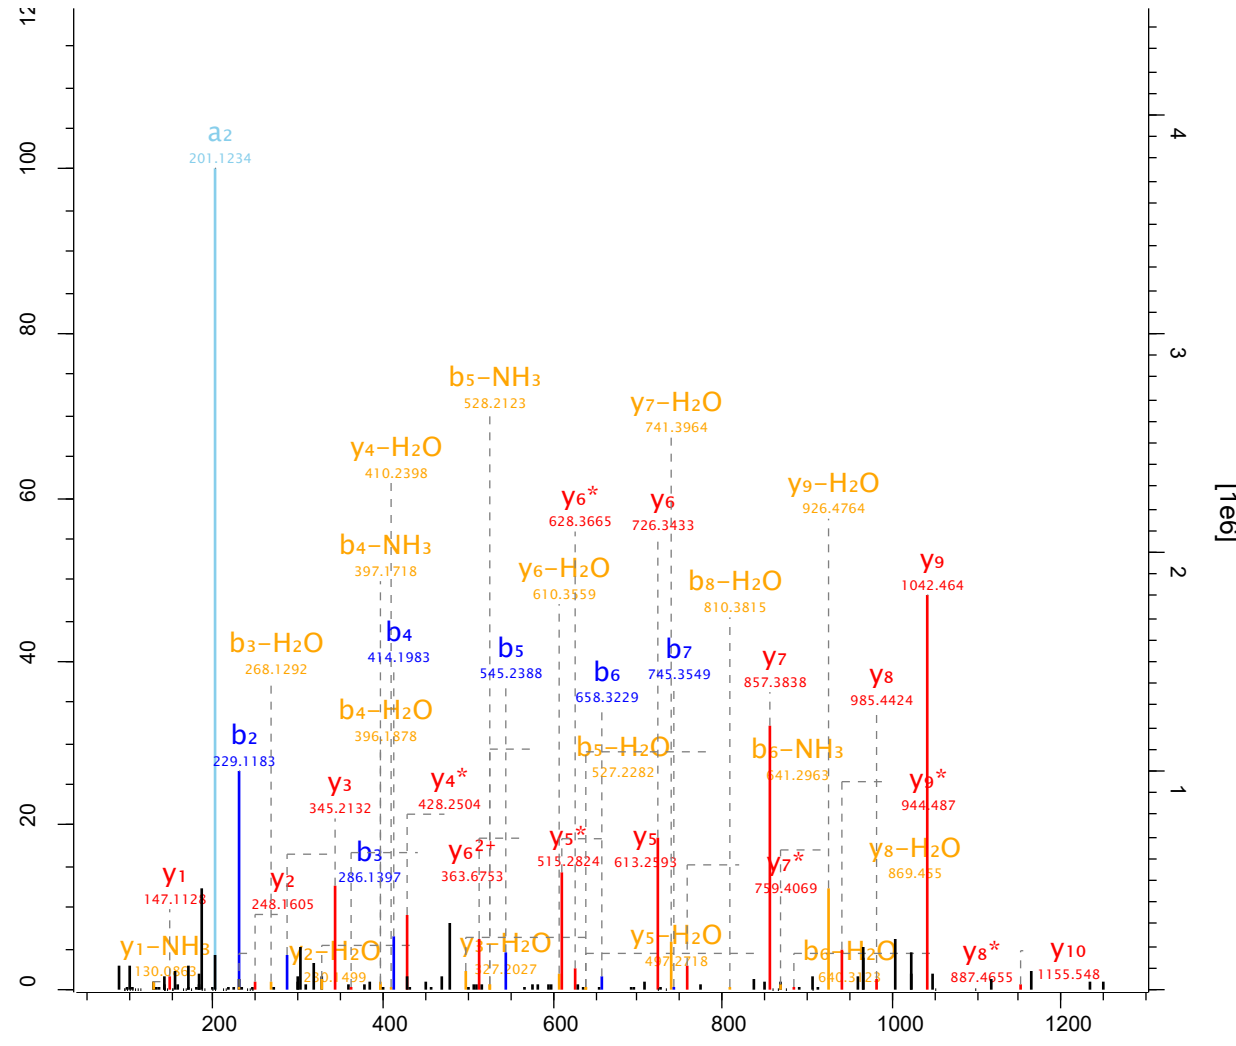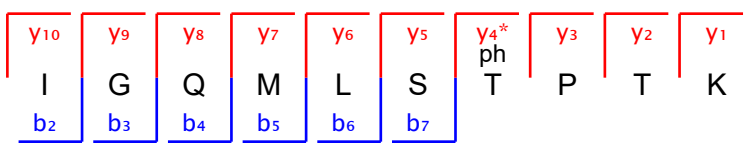

Raw file Scan Method Score m/z  
 sys\_05\_2 27838 FTMS; HCD 99.27 912.43

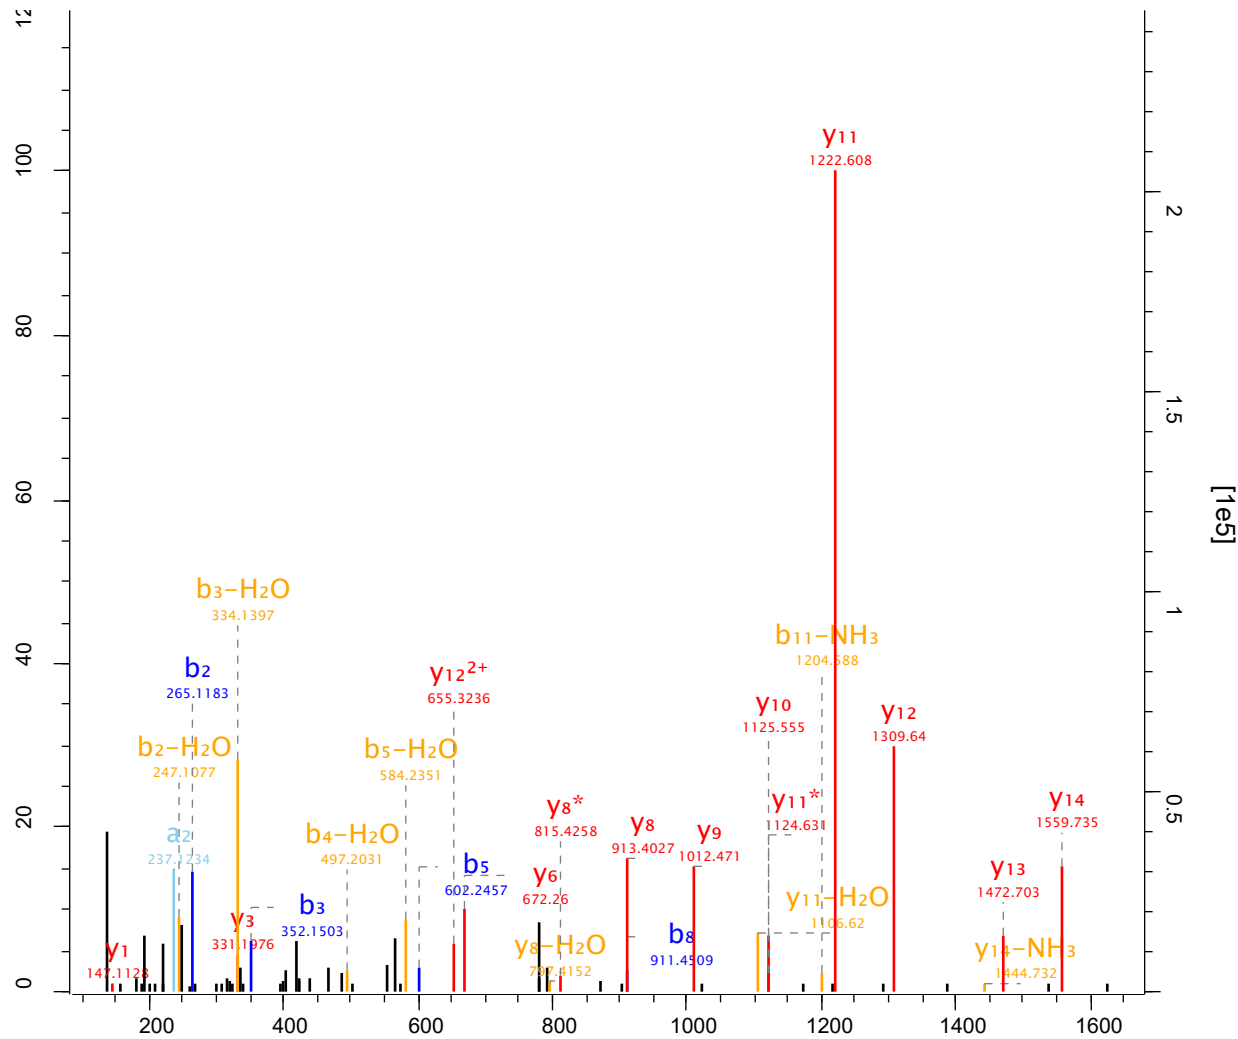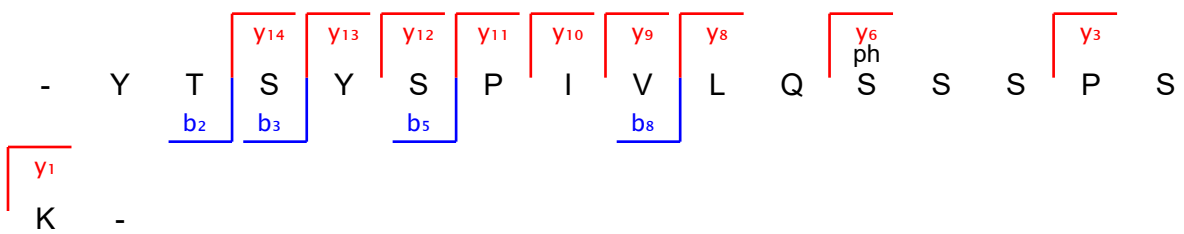

Raw file Scan Method Score m/z  
 sys\_05\_2 27987 FTMS; HCD 122.33 606.77

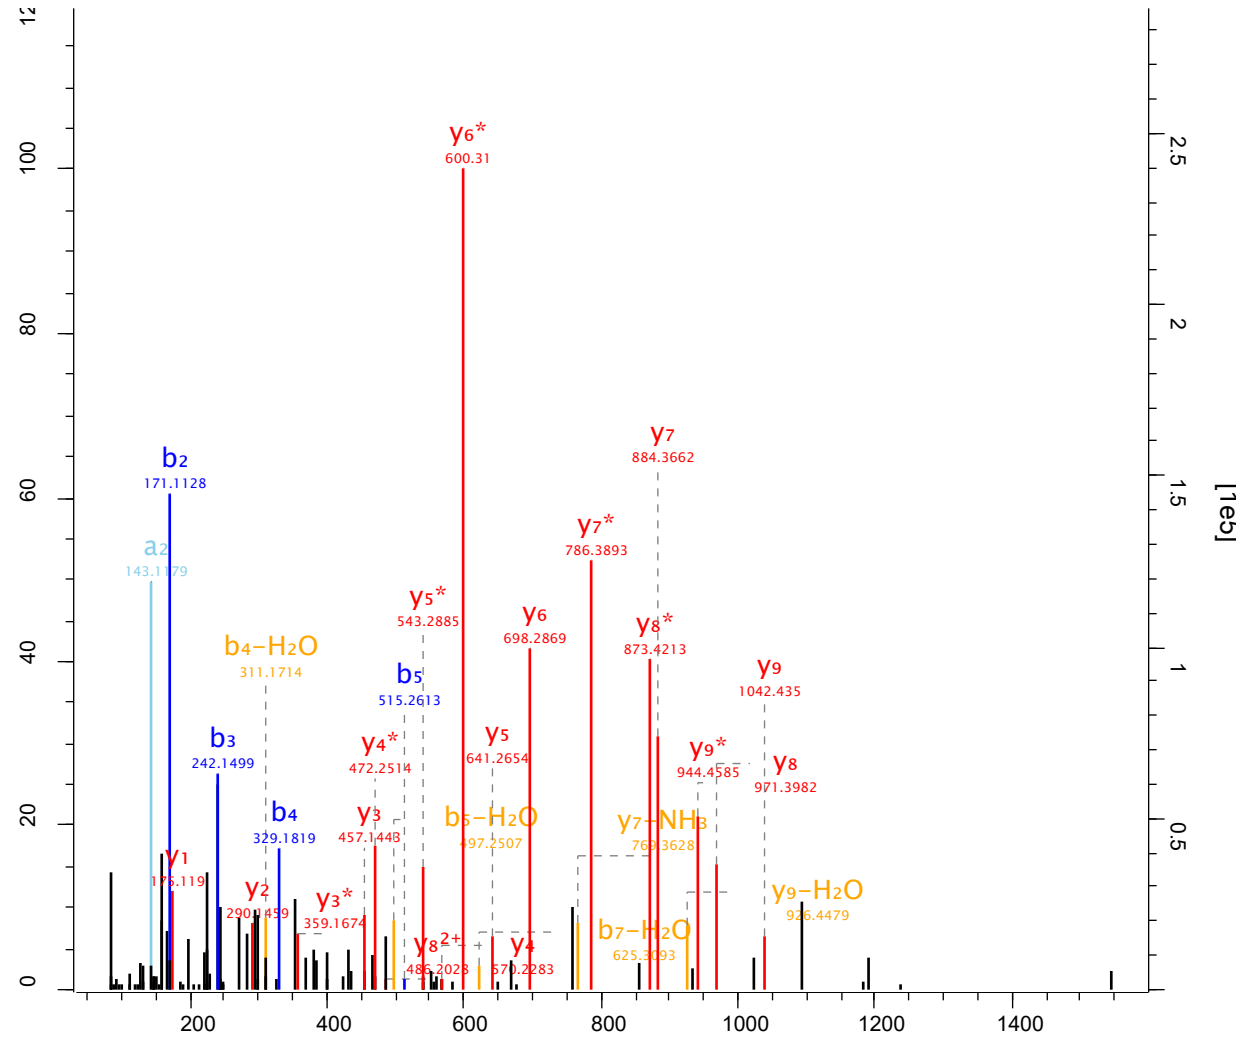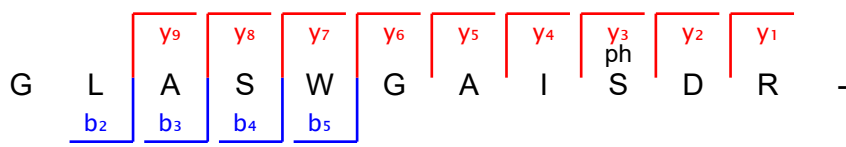

Raw file Scan Method Score m/z  
 sys\_05\_2 28580 FTMS; HCD 207.66 686.79

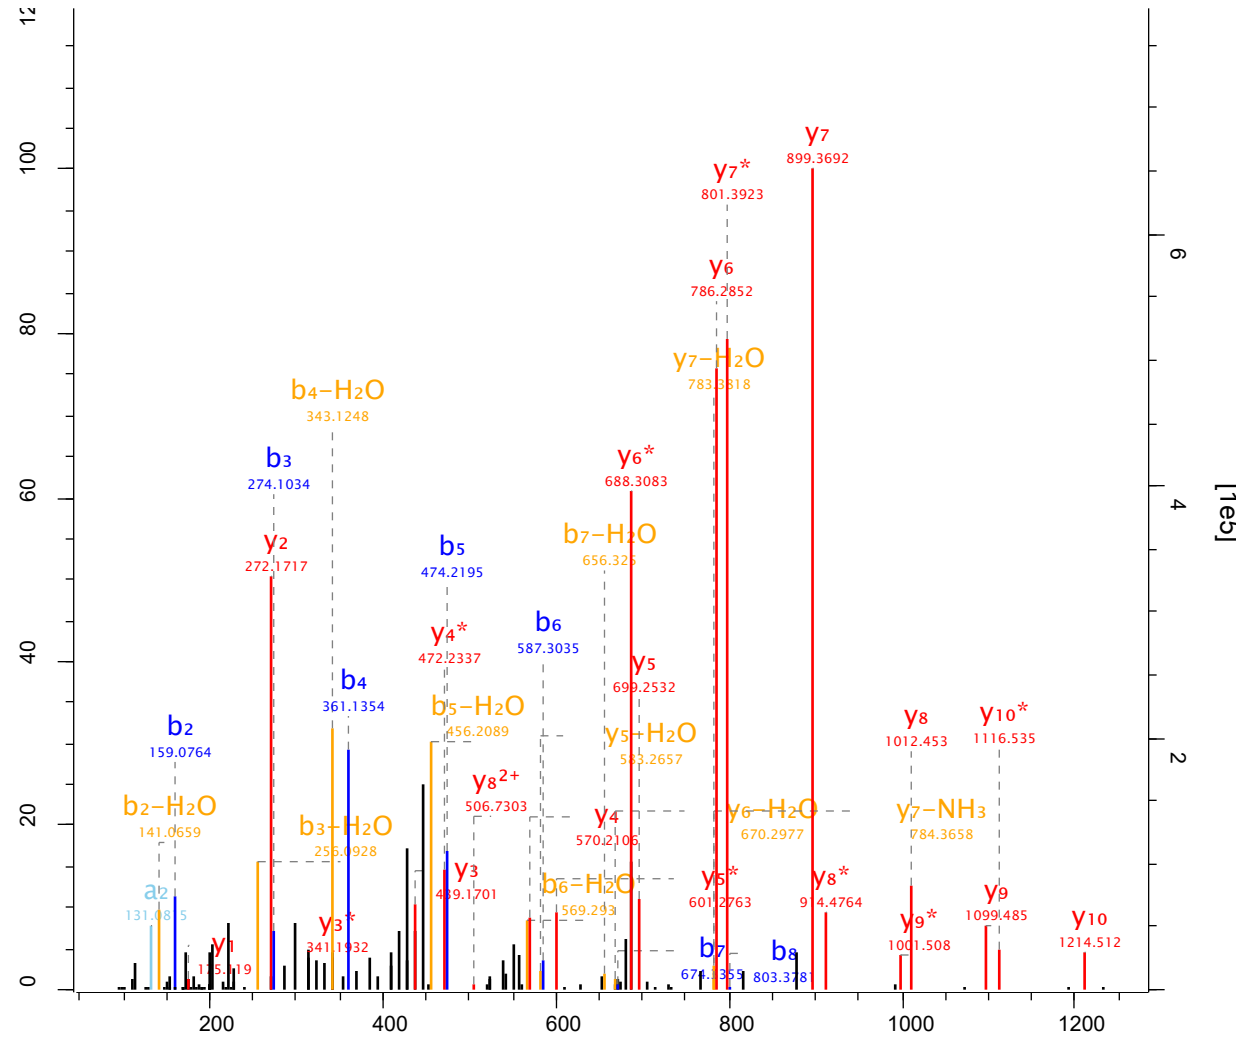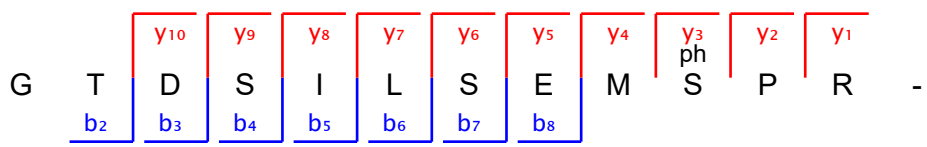

Raw file Scan Method Score m/z  
 sys\_05\_2 28619 FTMS; HCD 52.5 607.75

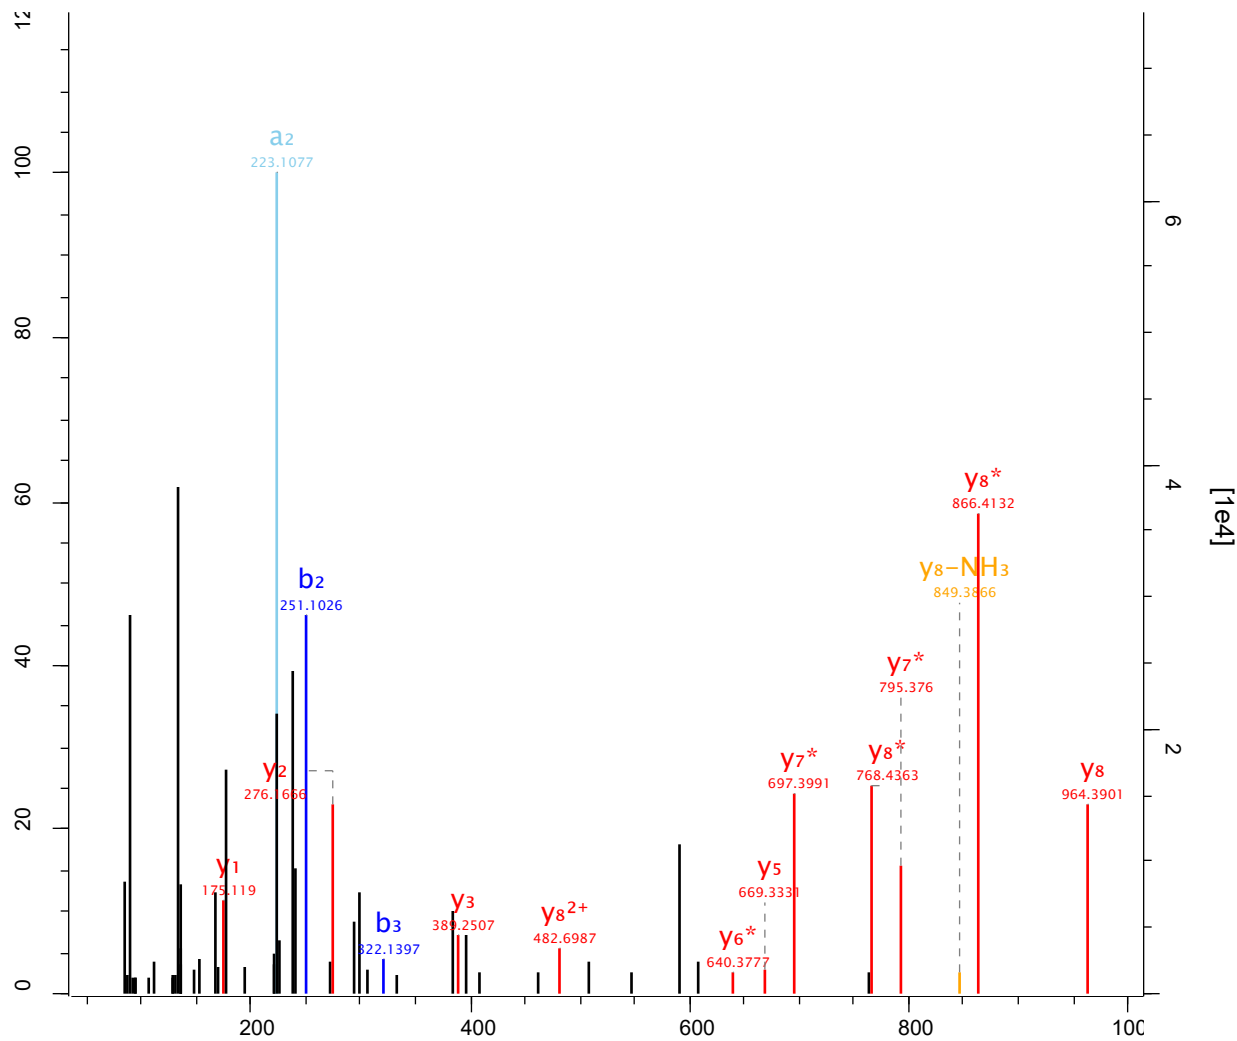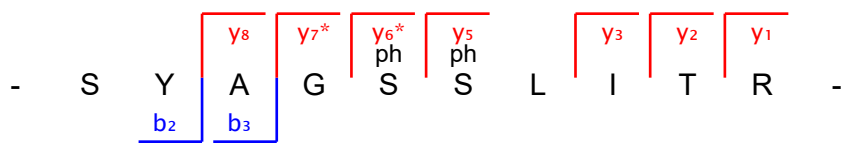



Raw file Scan Method Score m/z  
 sys\_05\_2 28630 FTMS; HCD 99.32 894.38

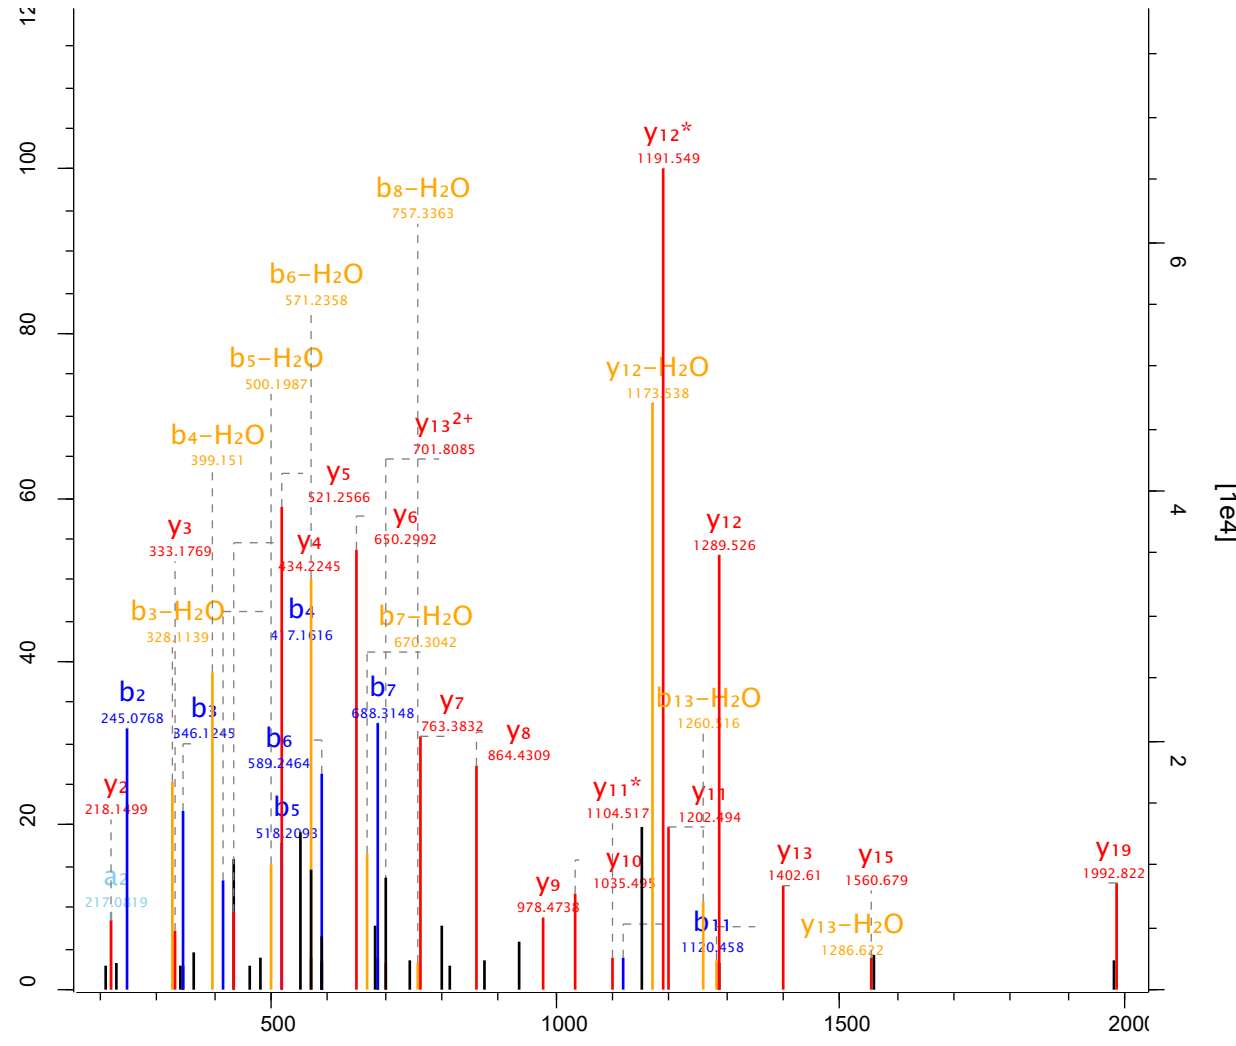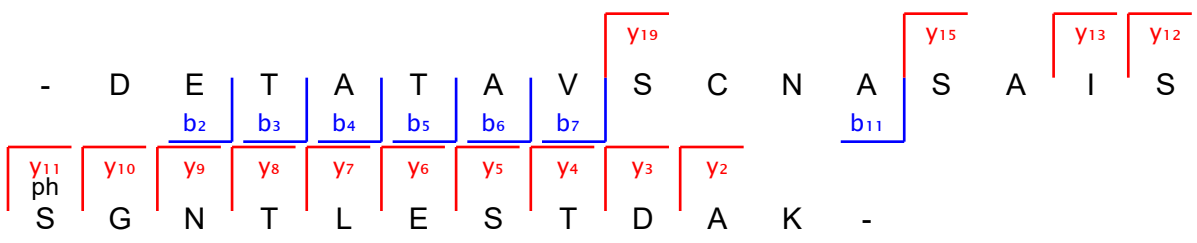

Raw file Scan Method Score m/z  
 sys\_05\_2 28908 FTMS; HCD 274.91 827.32

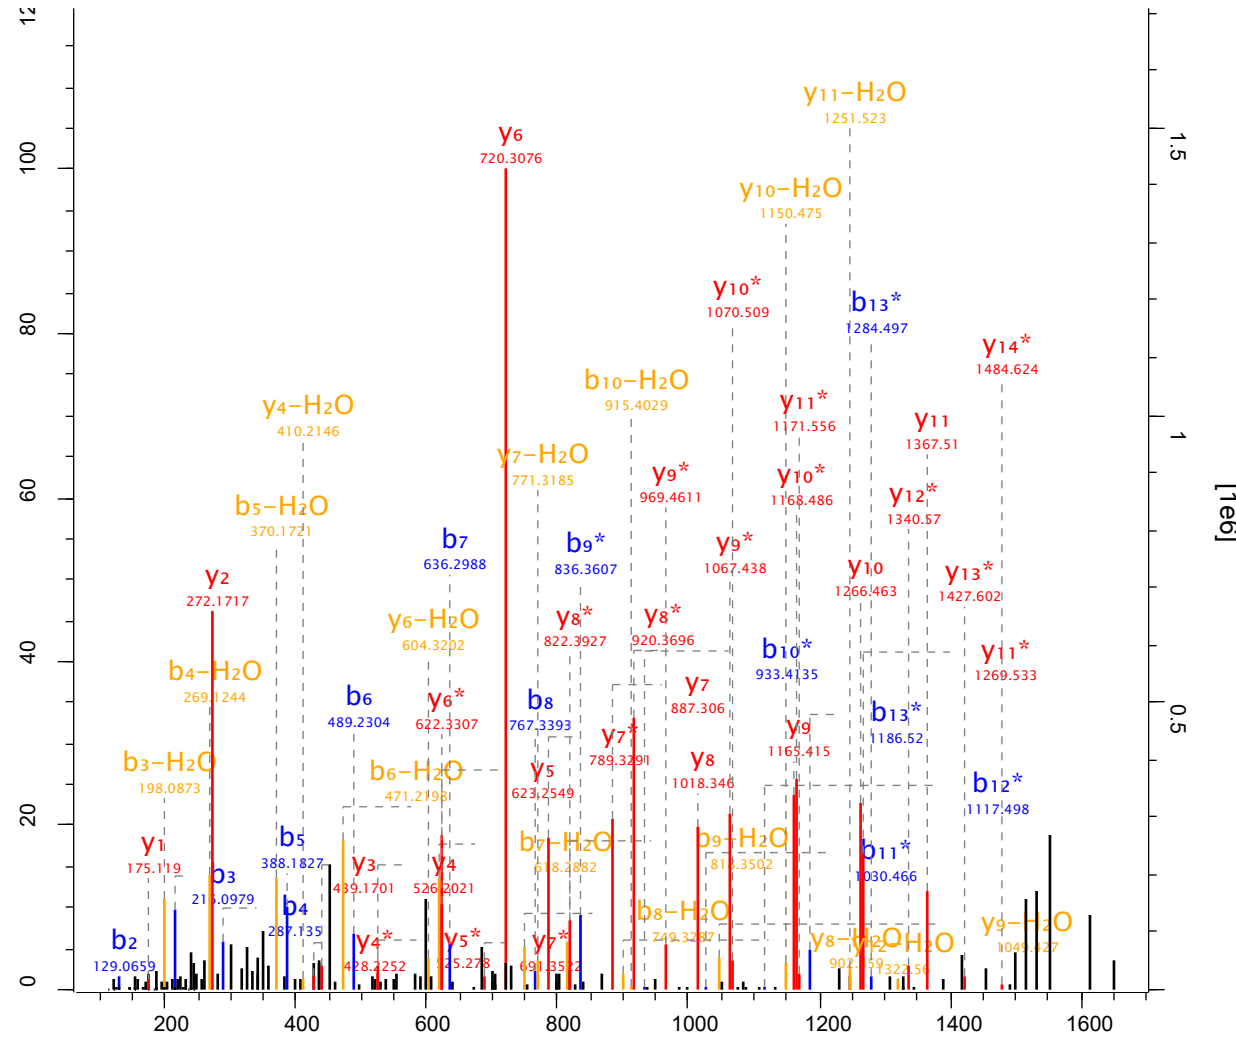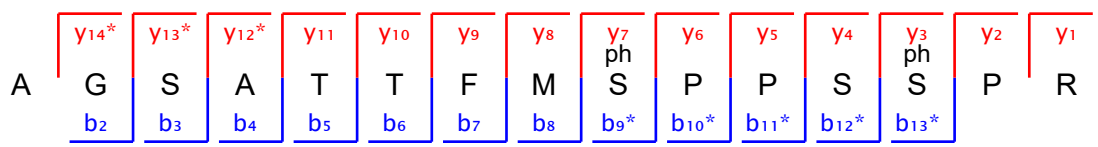

Raw file Scan Method Score m/z  
 sys\_05\_2 28958 FTMS; HCD 50.9 643.79

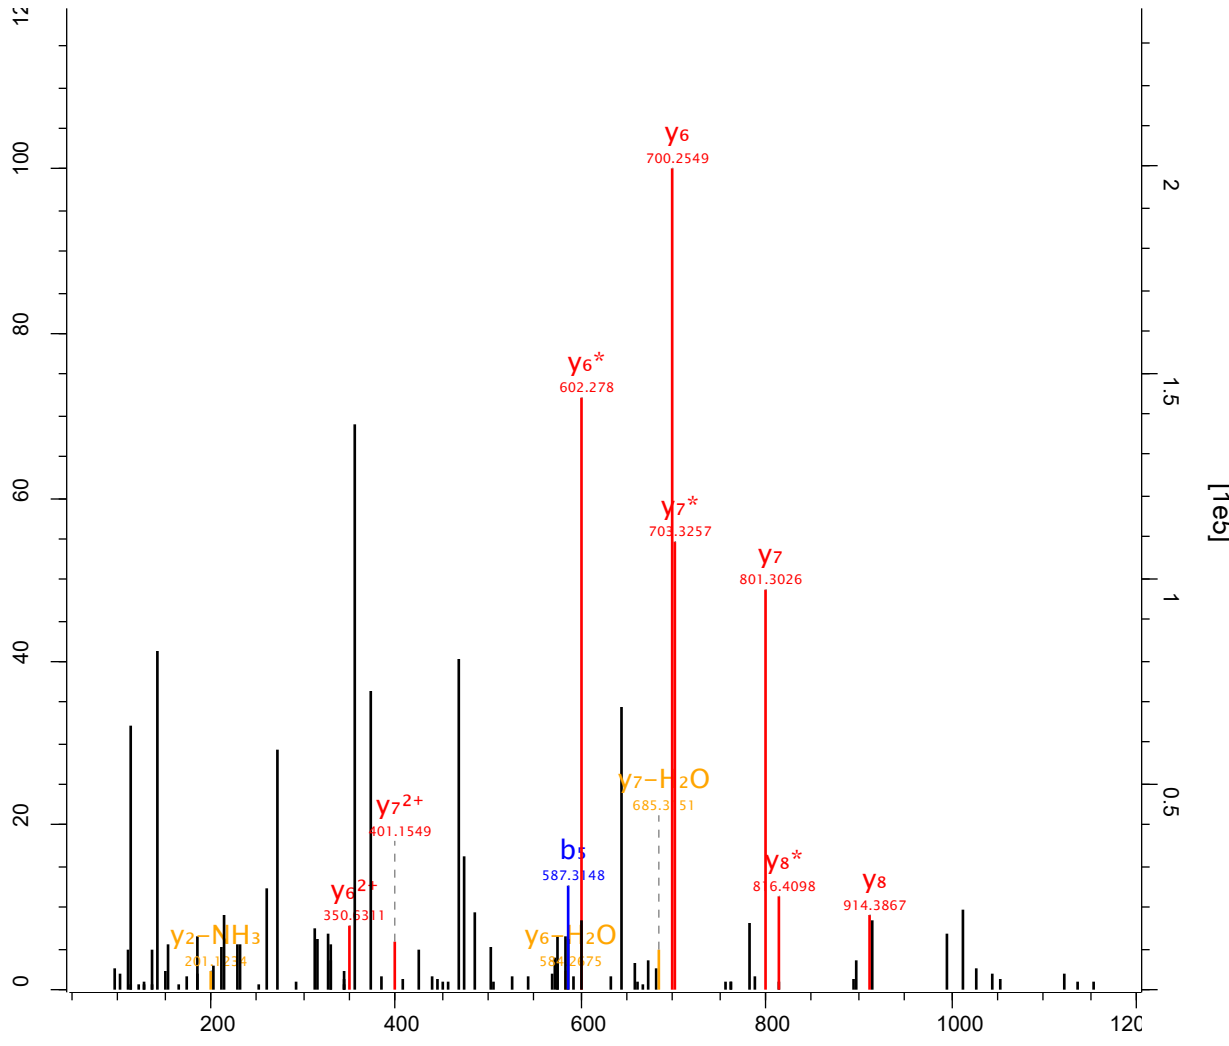

- S E R I T D ph S E A A K -

Annotations: y8 (I), y7 (T), y6 (D), b5 (T)

Raw file Scan Method Score m/z  
 sys\_05\_2 29072 FTMS; HCD 92.44 804.35

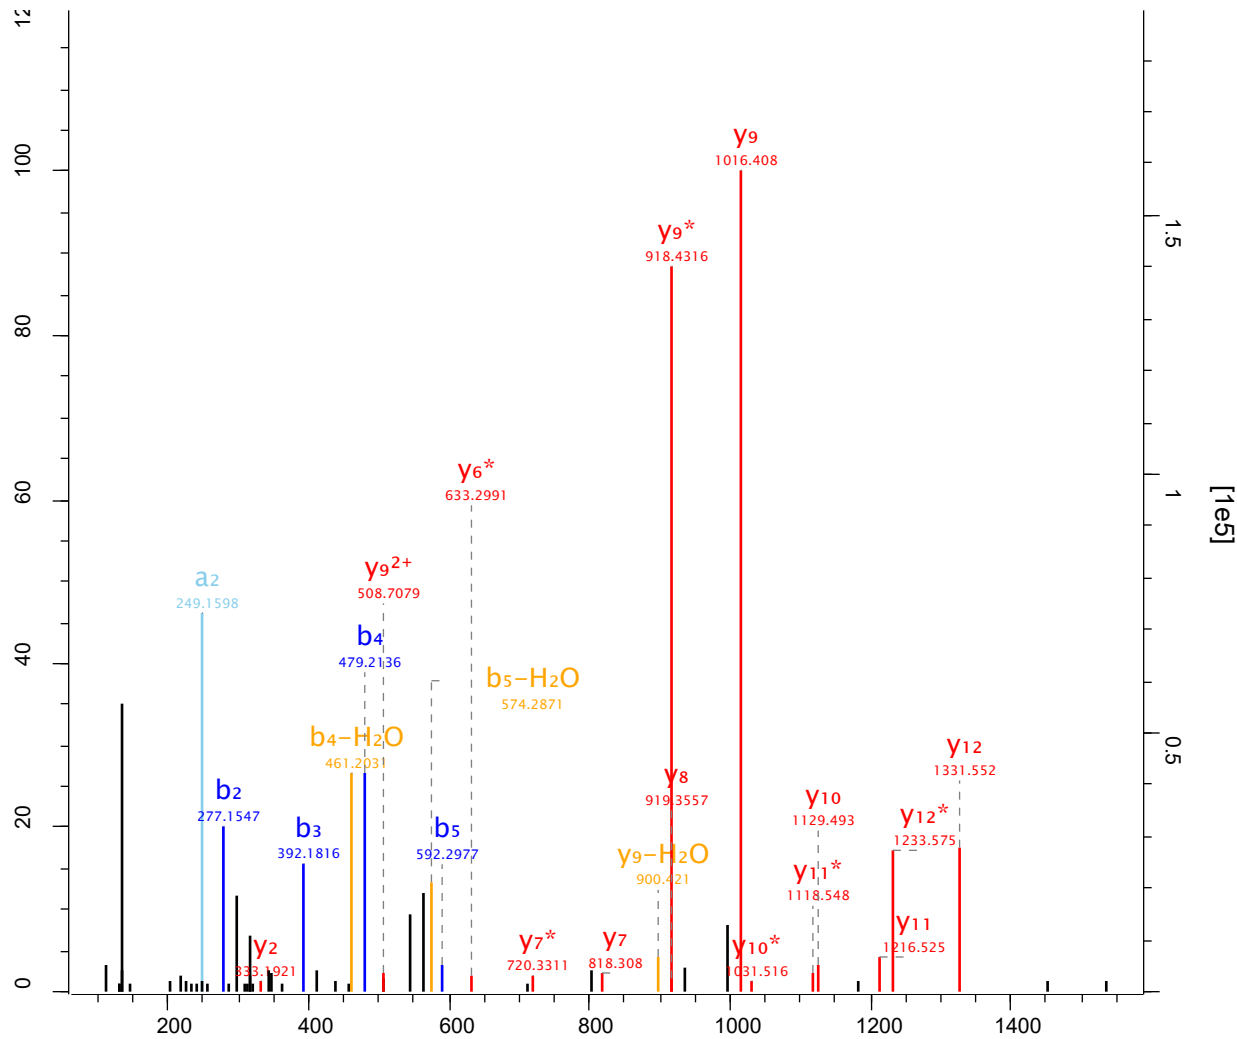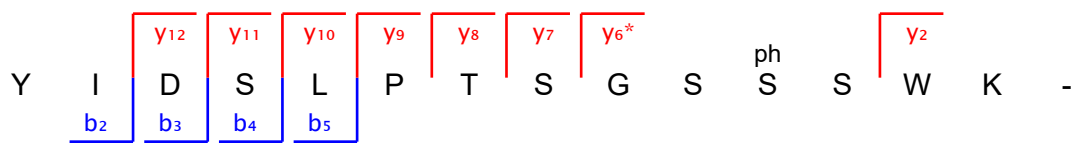

Raw file Scan Method Score m/z  
 sys\_05\_2 29132 FTMS; HCD 104.88 867.39

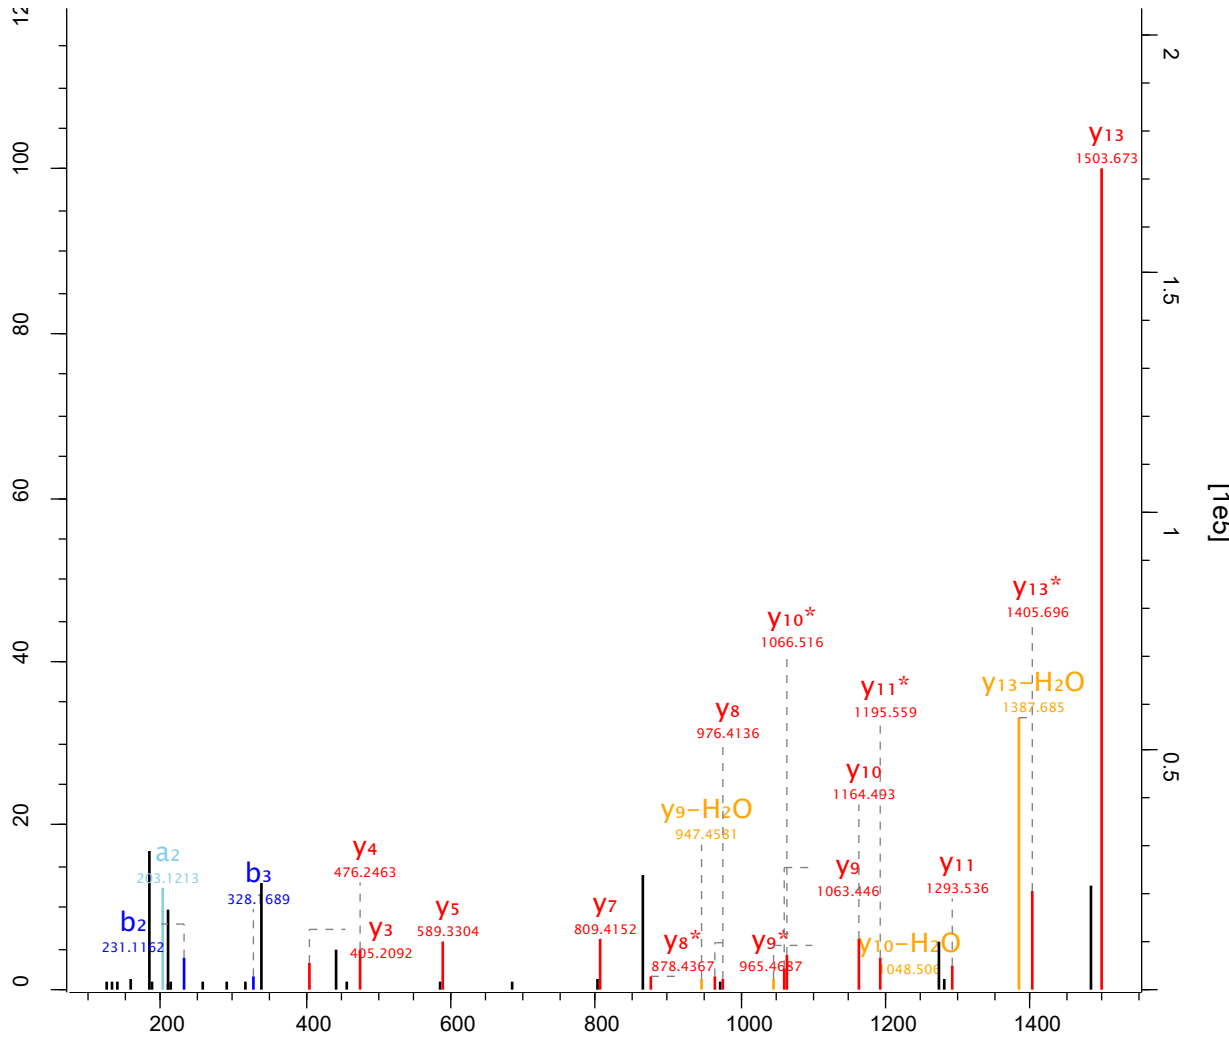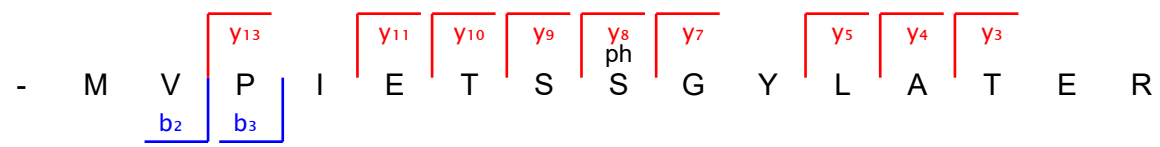

Raw file Scan Method Score m/z  
 sys\_05\_2 29141 FTMS; HCD 131.18 854.9

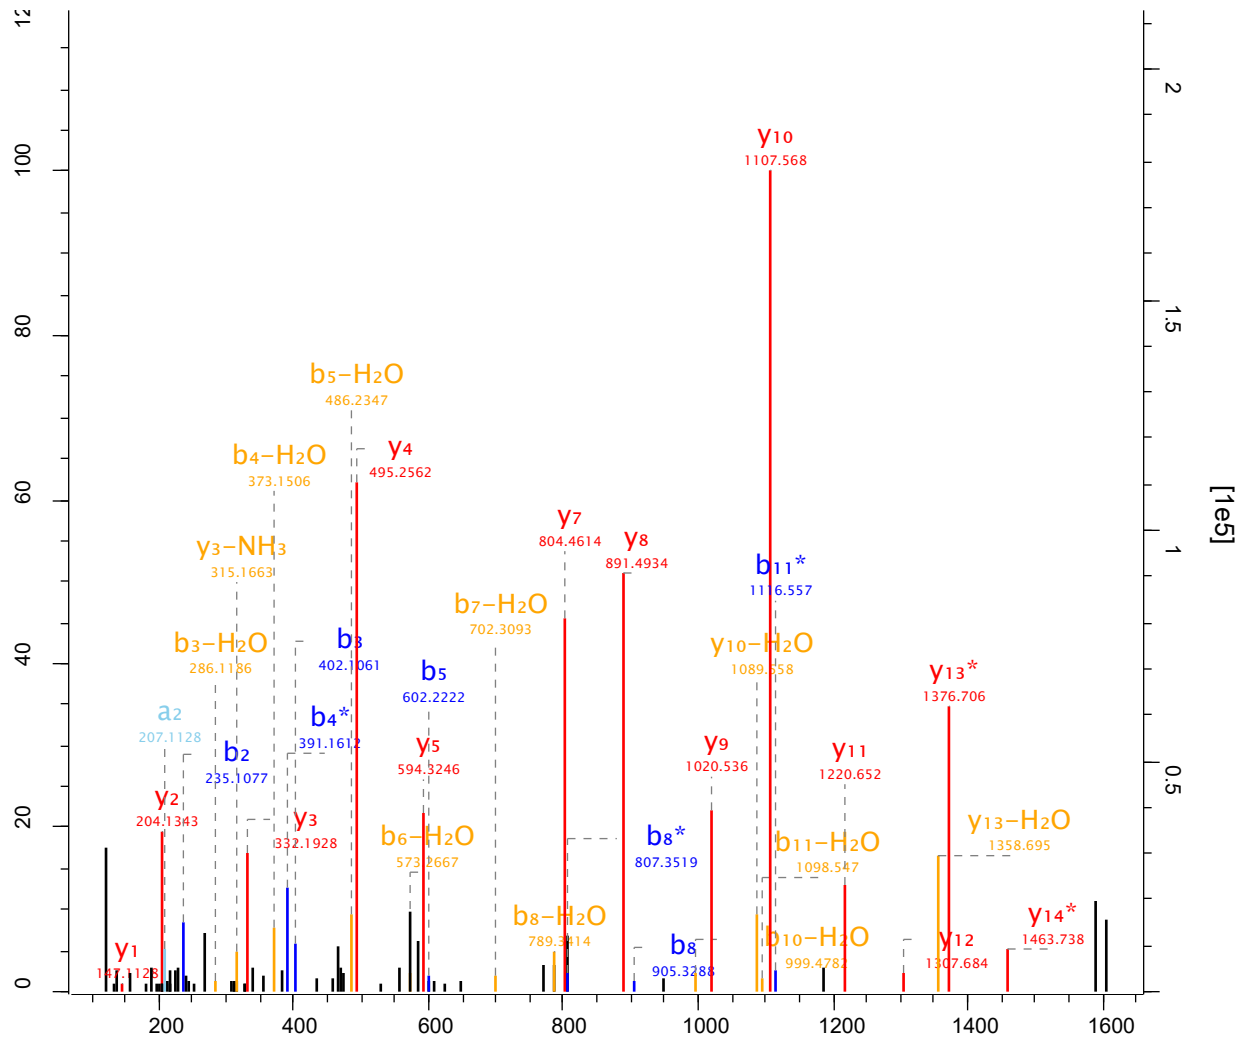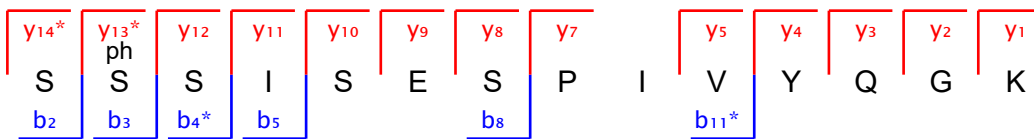

Raw file Scan Method Score m/z  
 sys\_05\_2 29684 FTMS; HCD 79.36 1089.5

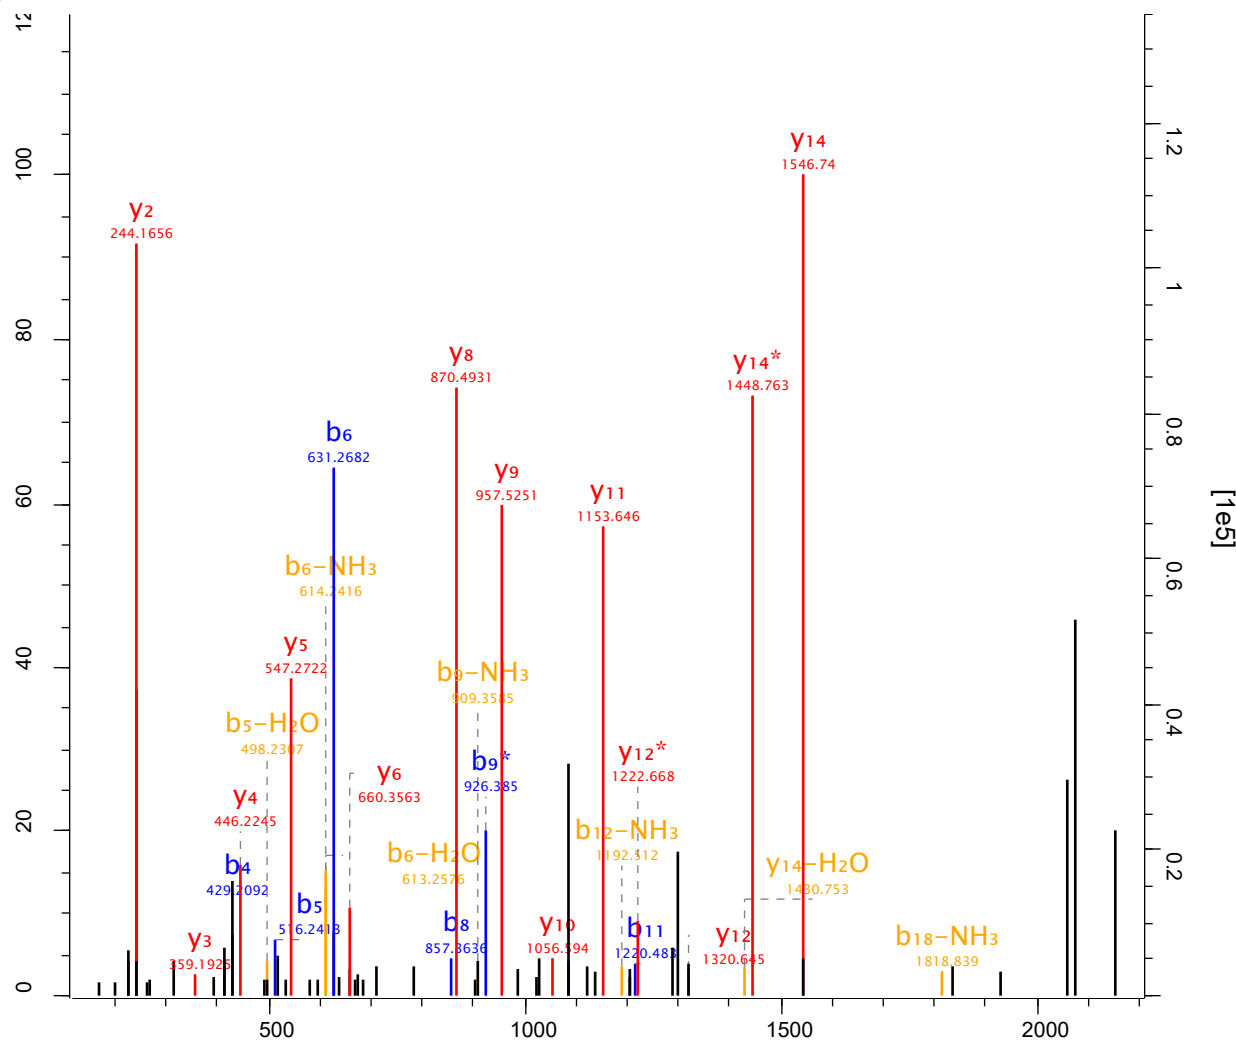

- L S N N S D P E S P V S P L L

y5
y4
y3
y2
b4
b5
b6
y14
y12 ph
y11
y10
y9
y8
y6
b9\*
b8
b11

T S D P K -

Raw file Scan Method Score m/z  
 sys\_05\_2 30131 FTMS; HCD 217.89 871.36

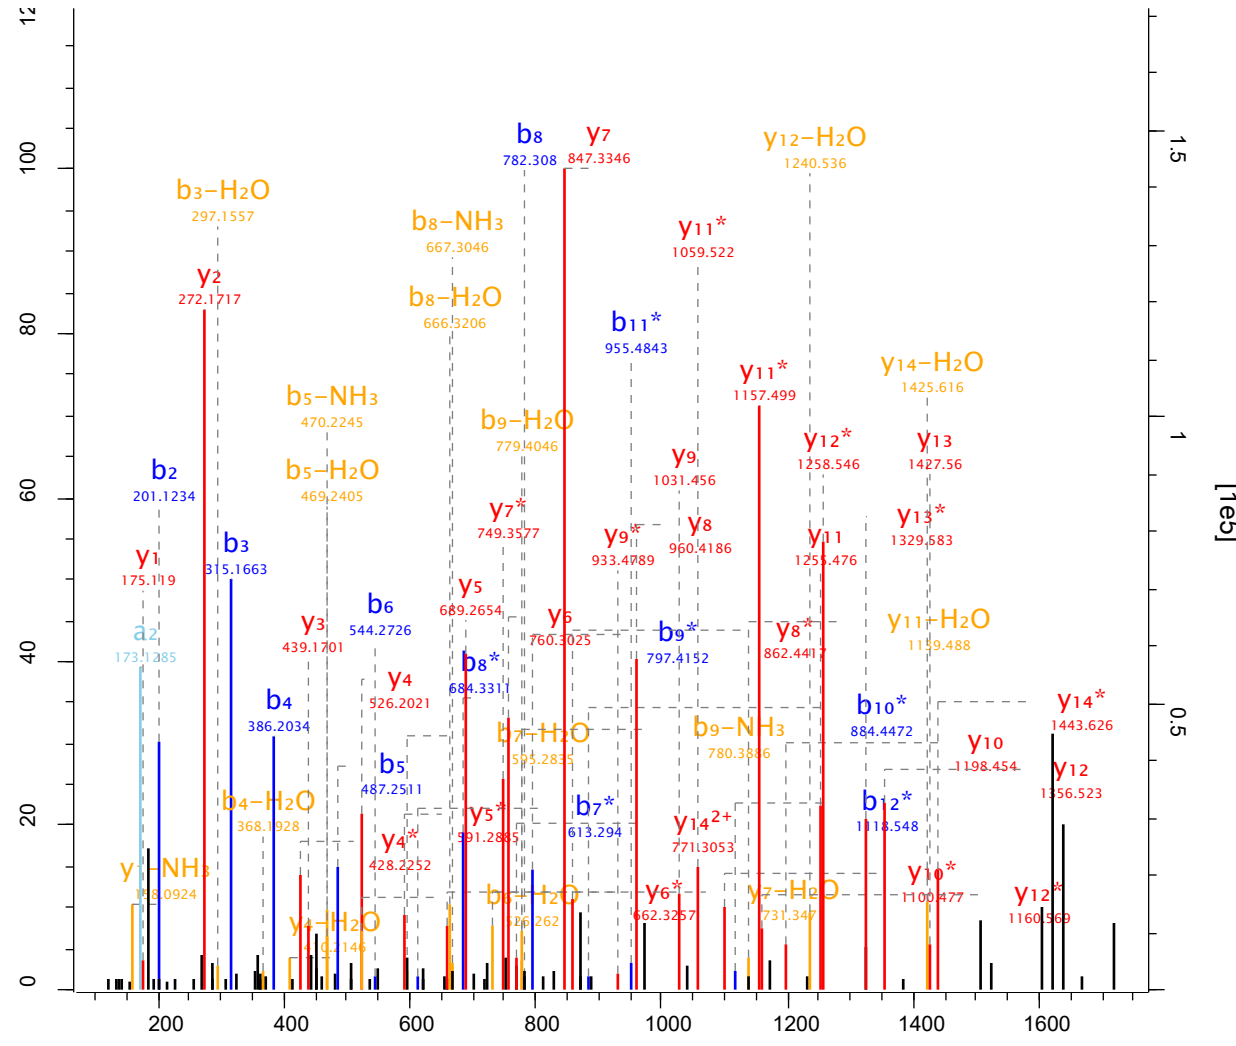

|   |   |      |     |     |     |     |     |    |     |      |      |      |    |    |   |   |
|---|---|------|-----|-----|-----|-----|-----|----|-----|------|------|------|----|----|---|---|
|   |   | y14* | y13 | y12 | y11 | y10 | y9  | y8 | y7  | y6   | y5   | y4   | y3 | y2 |   |   |
| - | S | L    | N   | A   | T   | G   | S   | A  | L   | S    | A    | Y    | S  | ph | S | P |
|   |   | b2   | b3  | b4  | b5  | b6  | b7* | b8 | b9* | b10* | b11* | b12* |    |    |   |   |

R -



Raw file Scan Method Score m/z  
 sys\_05\_2 30162 FTMS; HCD 181.87 912.39

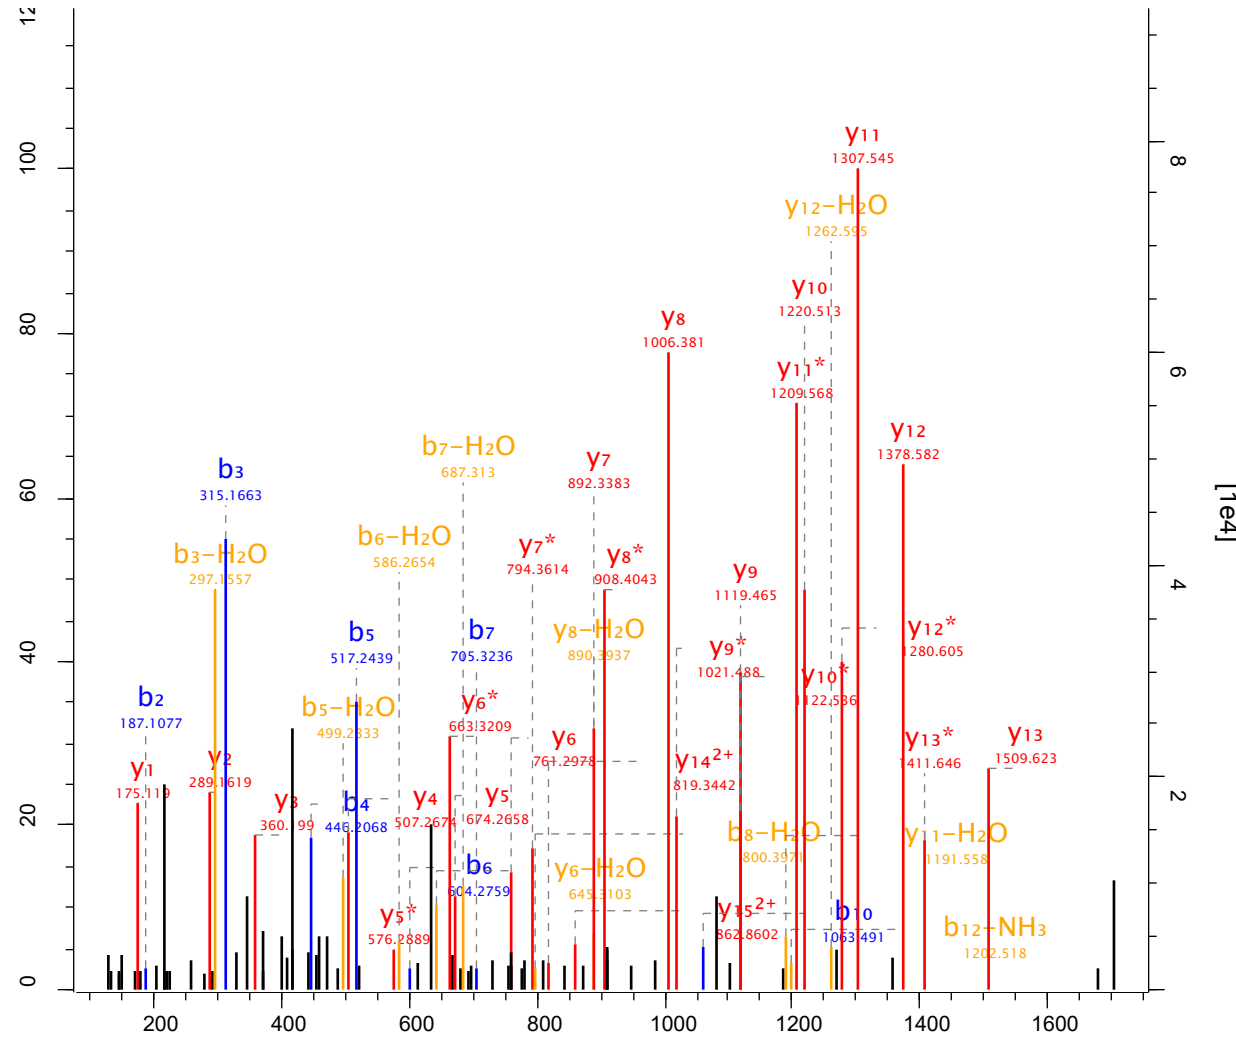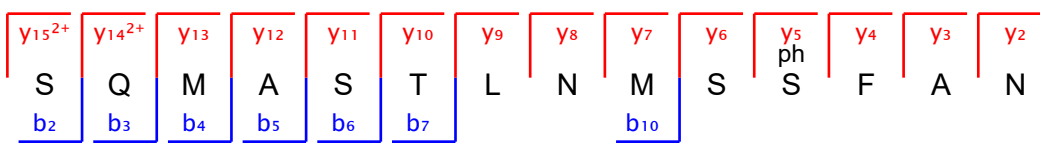

R -

Raw file Scan Method Score m/z  
 sys\_05\_2 30283 FTMS; HCD 42.31 745.87

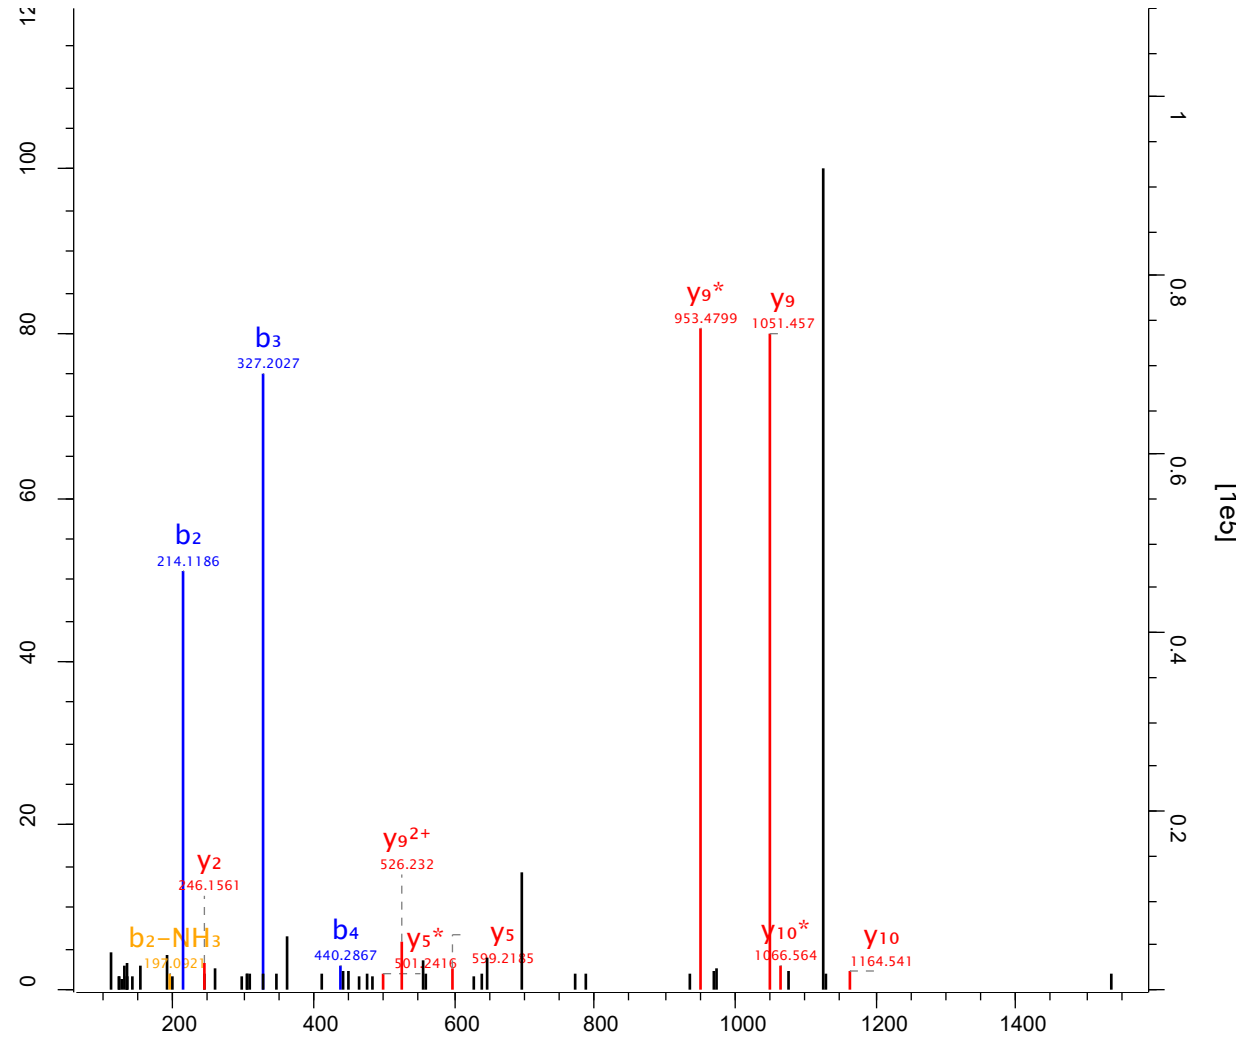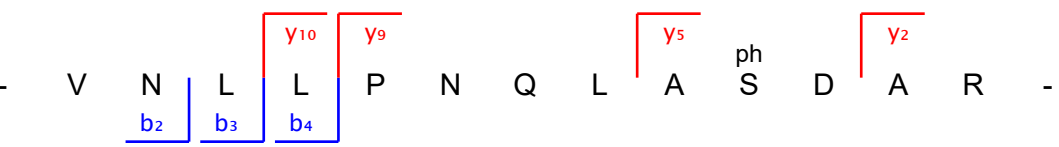

Raw file Scan Method Score m/z  
 sys\_05\_2 30398 FTMS; HCD 72.66 663.27

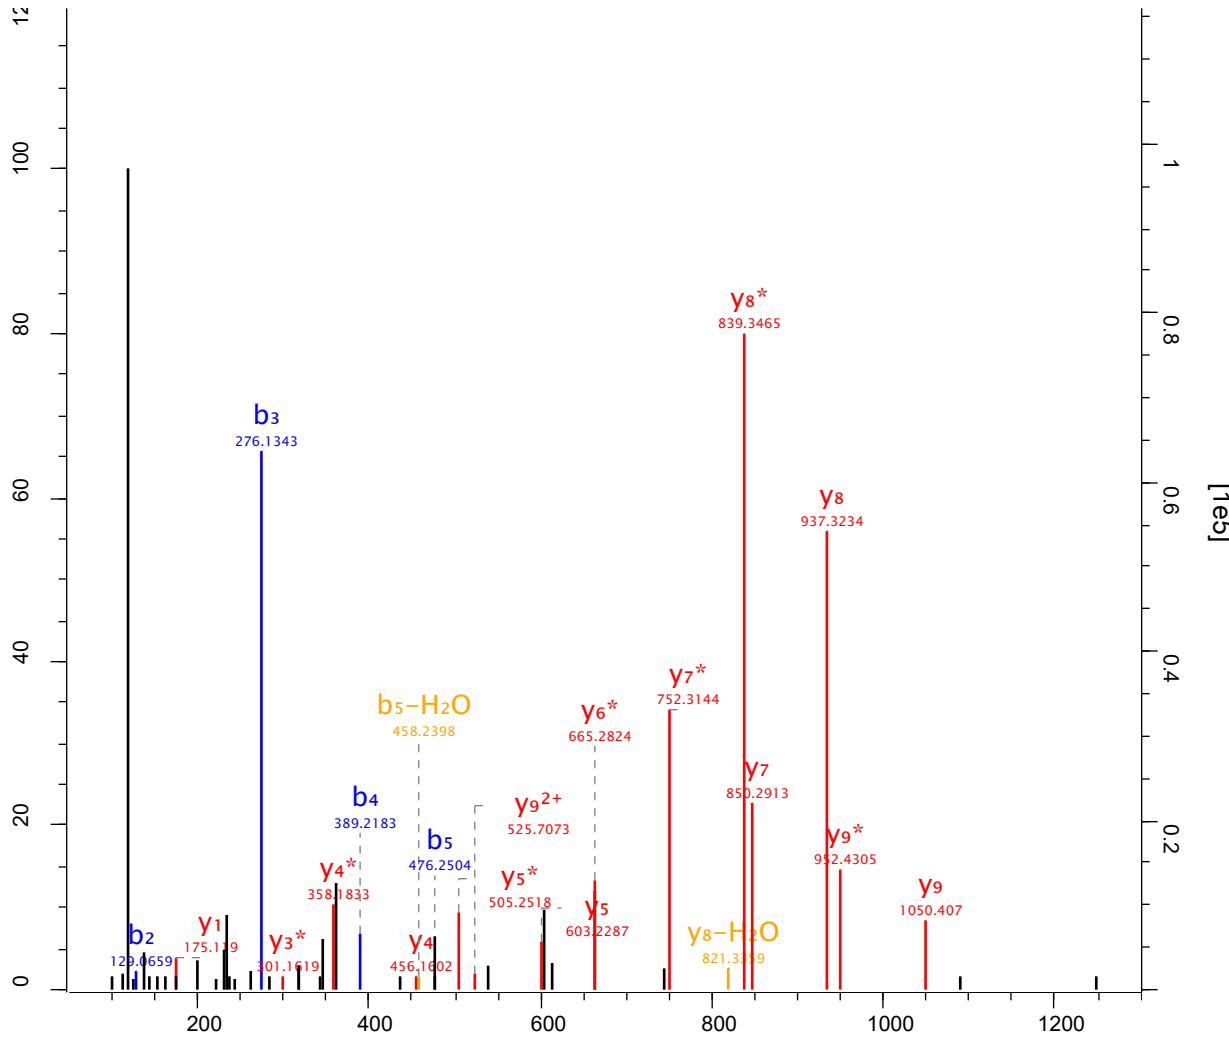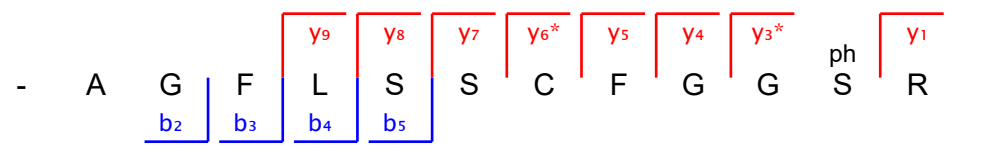

Raw file Scan Method Score m/z  
 sys\_05\_2 30514 FTMS; HCD 162.59 730.33

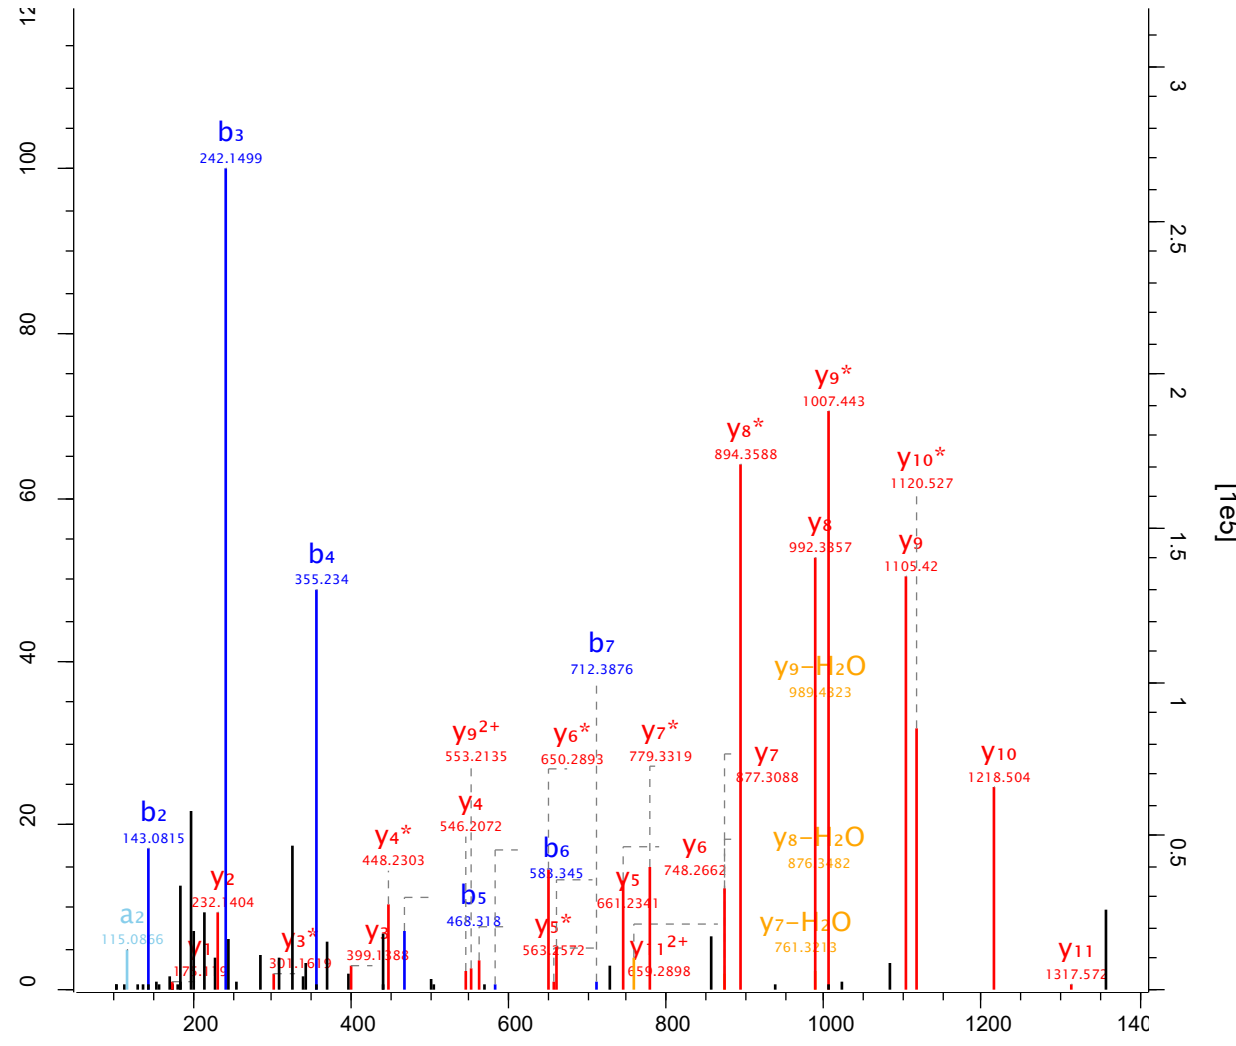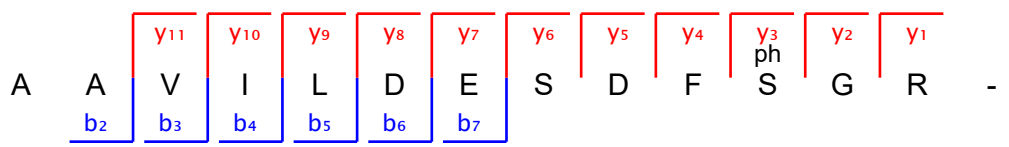

Raw file Scan Method Score m/z  
 sys\_05\_2 30700 FTMS; HCD 52.58 635.79

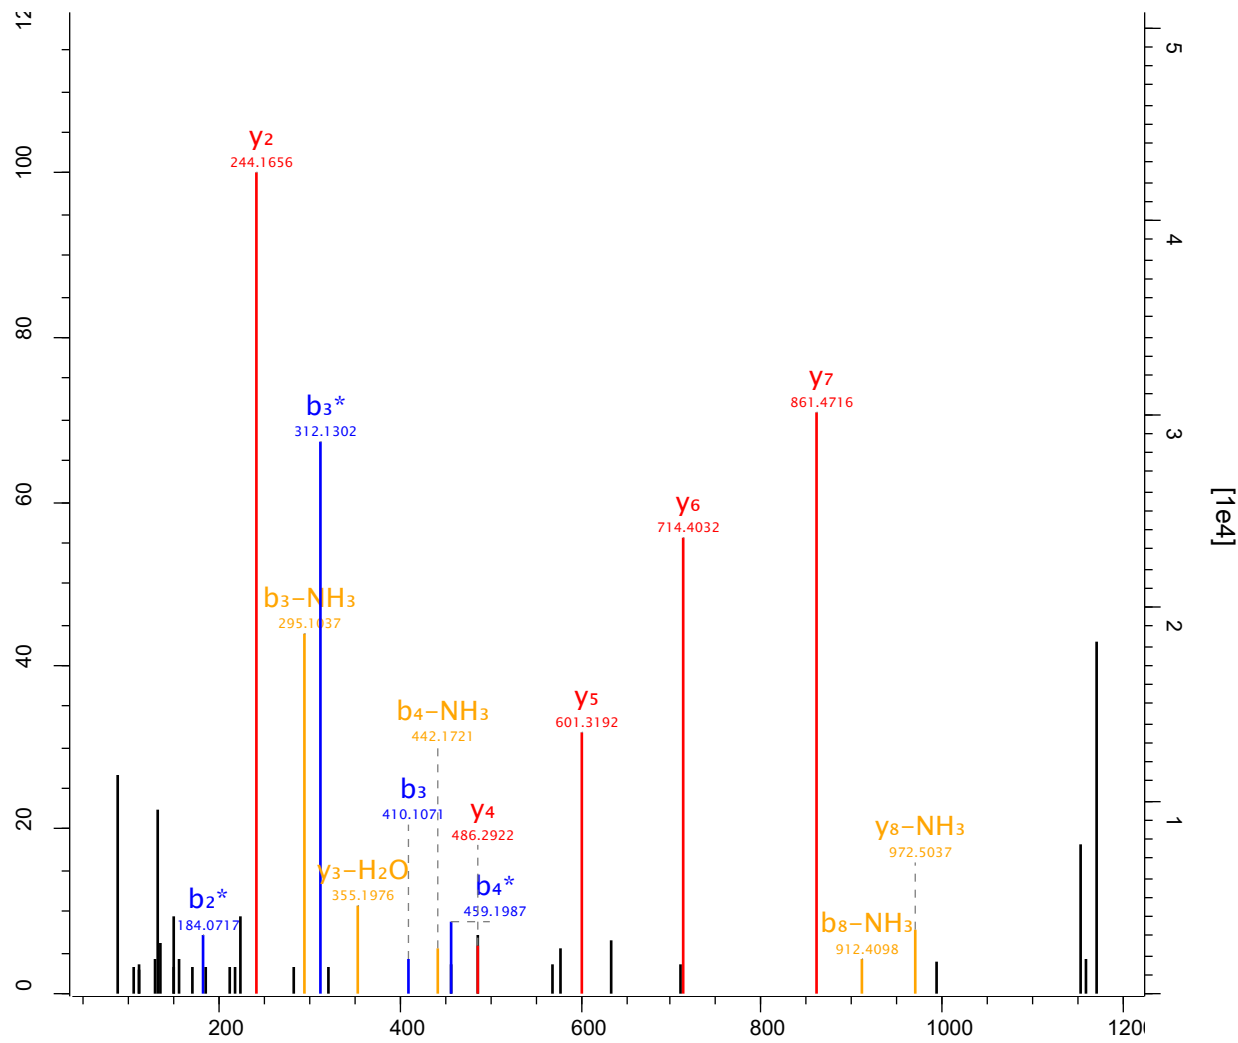

ph  
 - S N Q F I D L E P K -  
 b2\* b3 b4\* y7 y6 y5 y4 y2

Raw file Scan Method Score m/z  
 sys\_05\_2 30743 FTMS; HCD 89.3 574.78

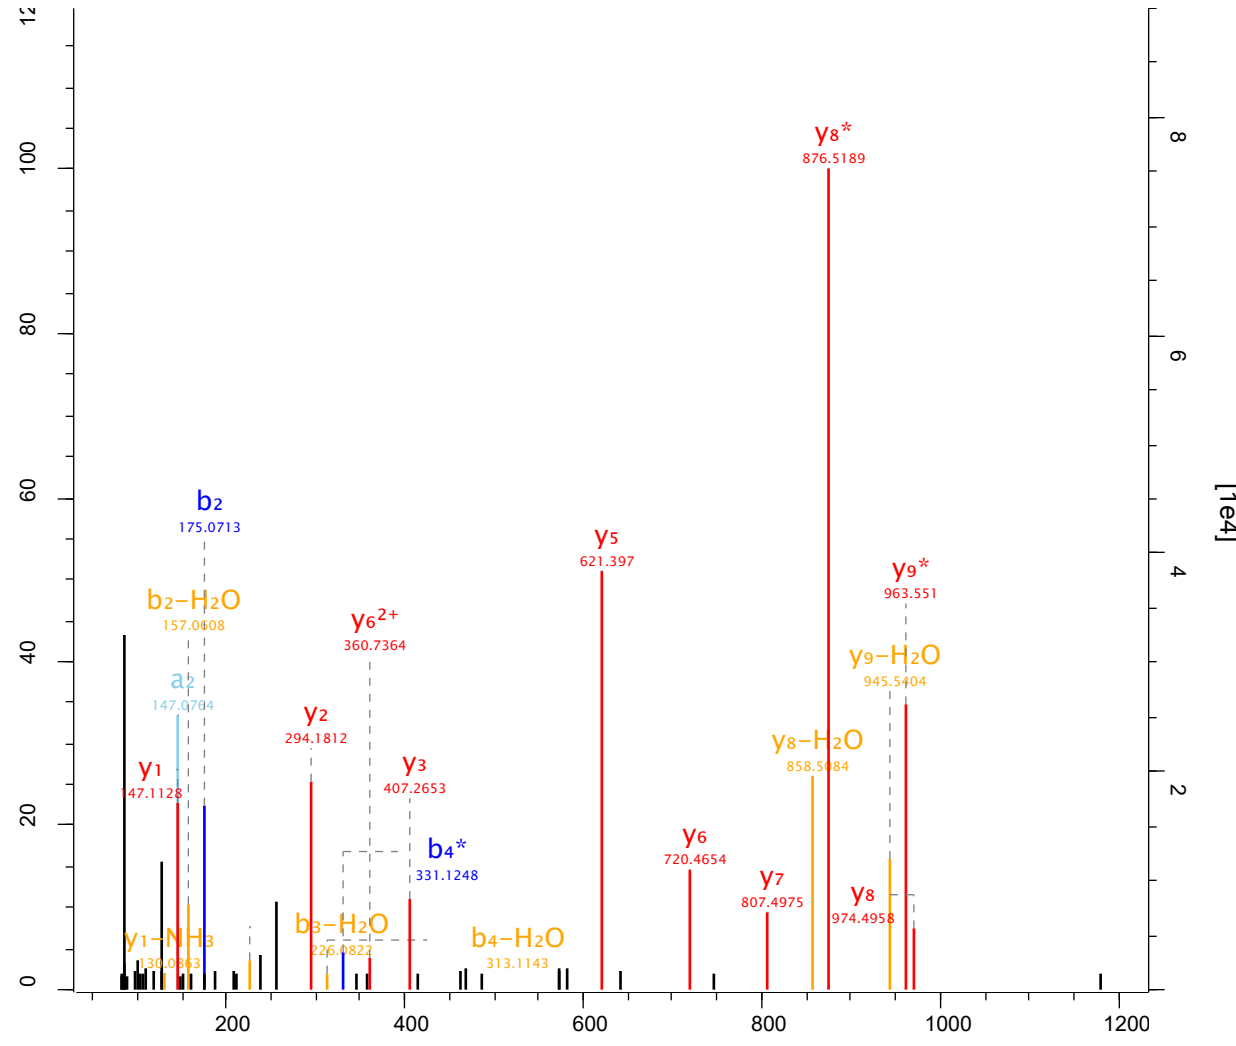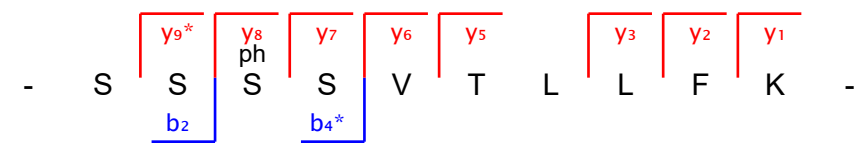

Raw file Scan Method Score m/z  
 sys\_05\_2 30774 FTMS; HCD 84.95 931.41

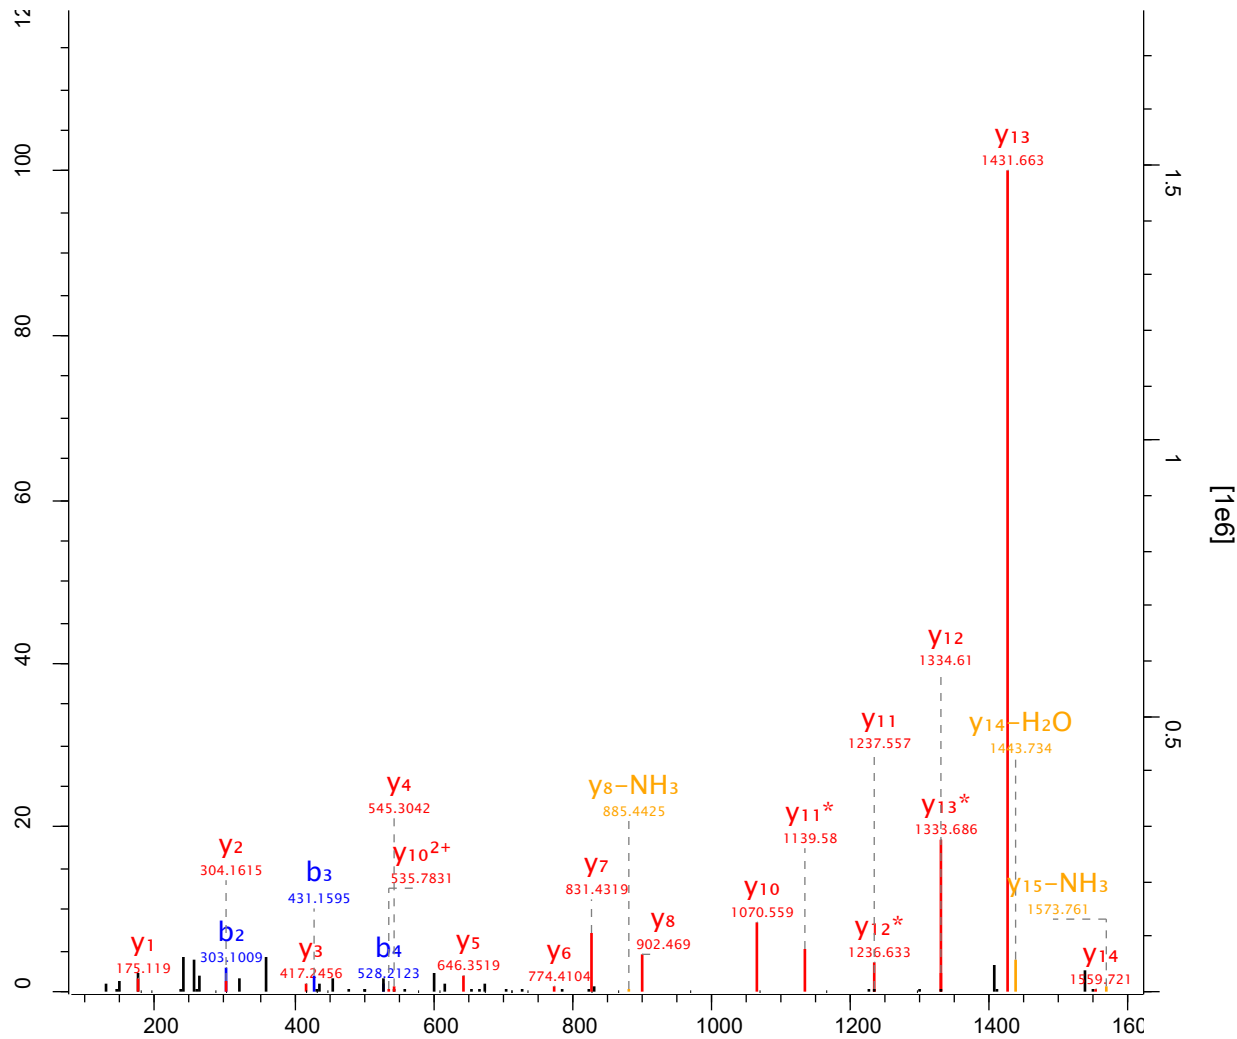

ac - M E Q P P S P A A G Q T Q L E  
 b<sub>2</sub> b<sub>3</sub> b<sub>4</sub>  
 y<sub>1</sub>  
 R -

Raw file Scan Method Score m/z  
 sys\_05\_2 3081 FTMS; HCD 115.91 628.27

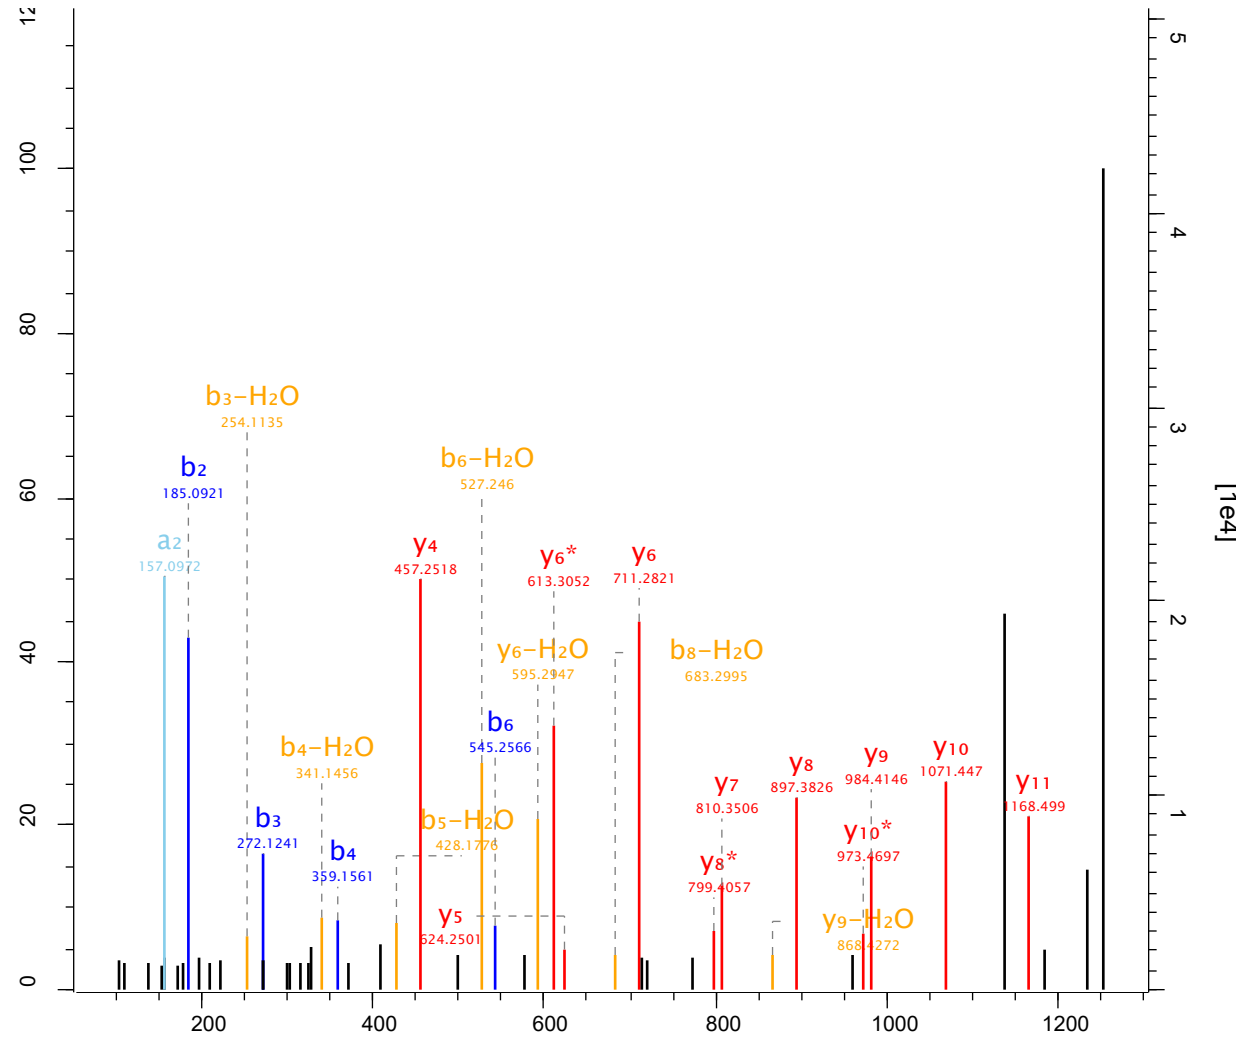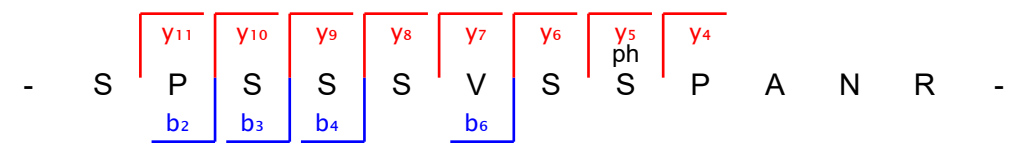



Raw file Scan Method Score m/z  
 sys\_05\_2 30905 FTMS; HCD 54.09 779.89

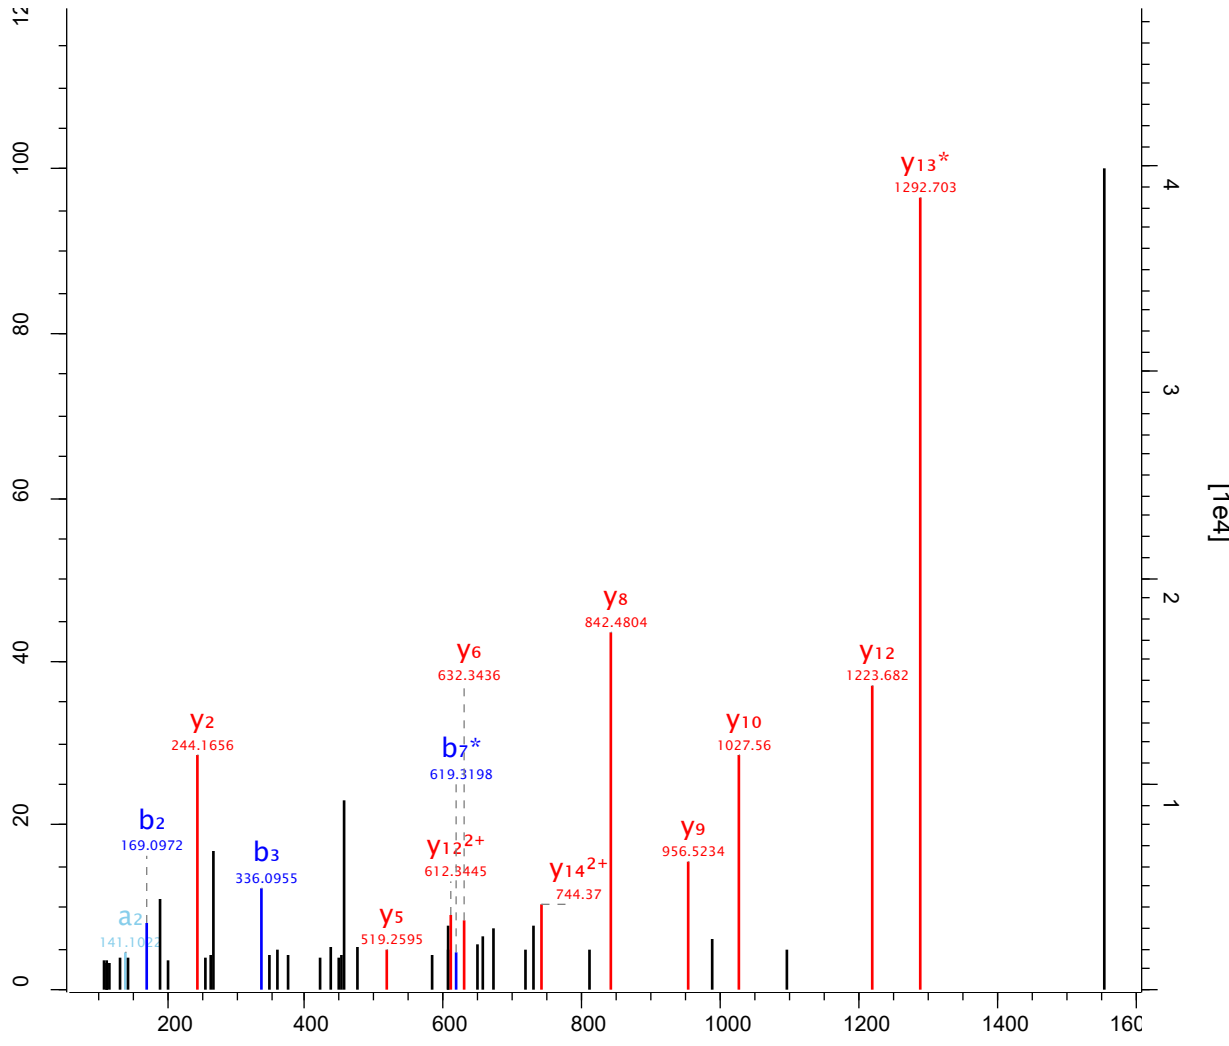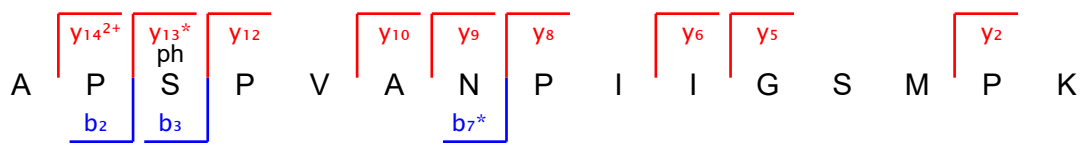

Raw file Scan Method Score m/z  
 sys\_05\_2 31025 FTMS; HCD 248.67 698.82

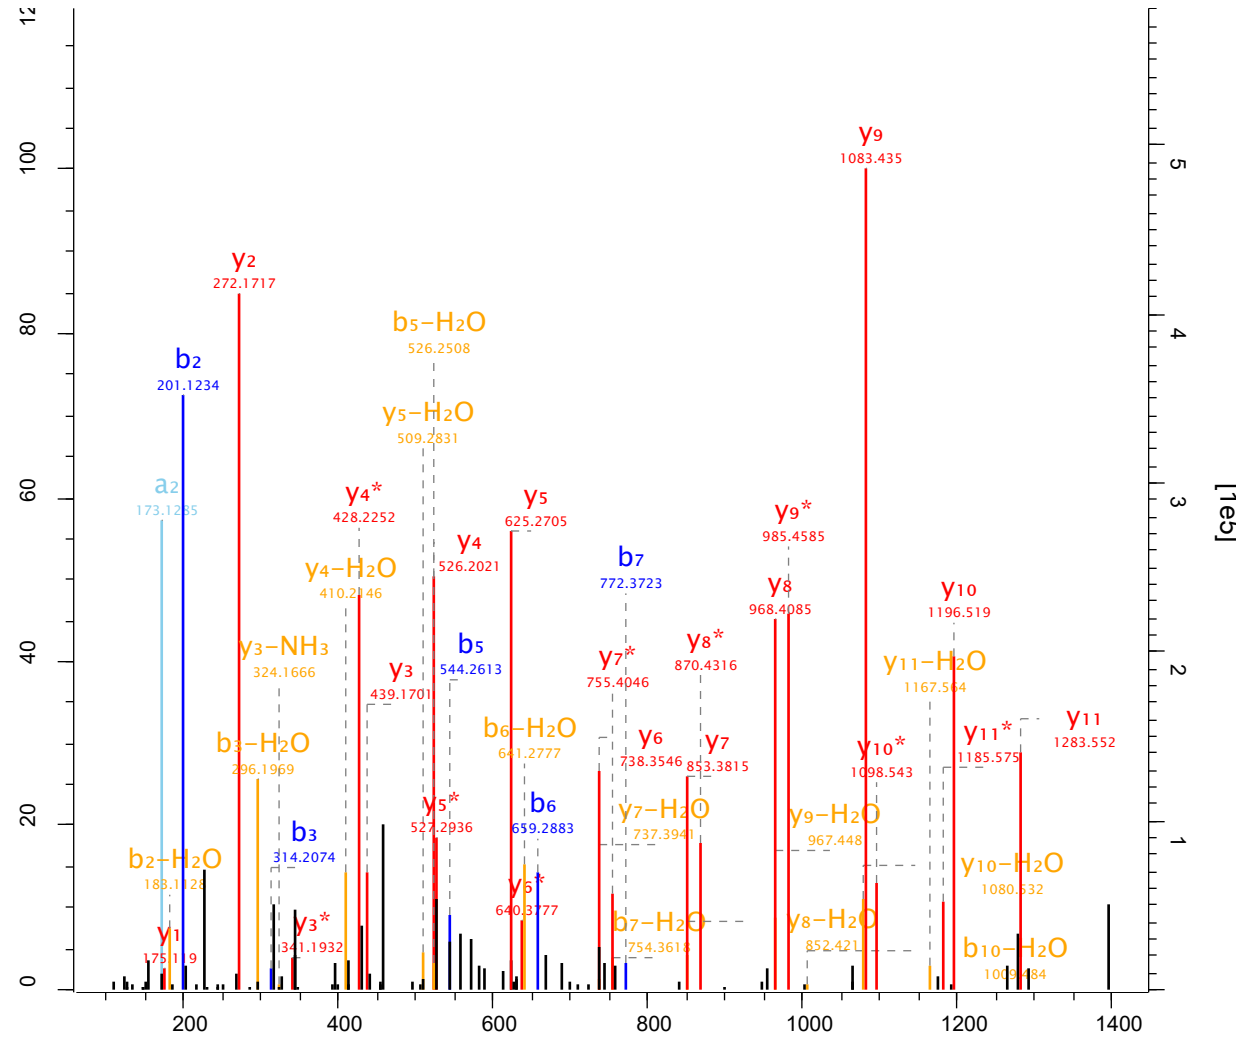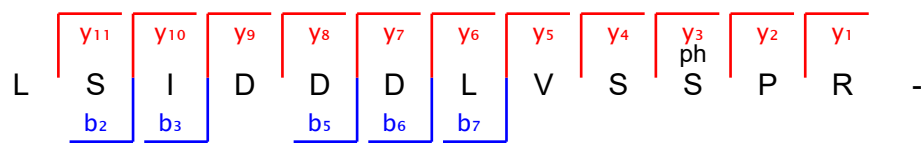

Raw file Scan Method Score m/z  
 sys\_05\_2 31109 FTMS; HCD 84.75 673.81

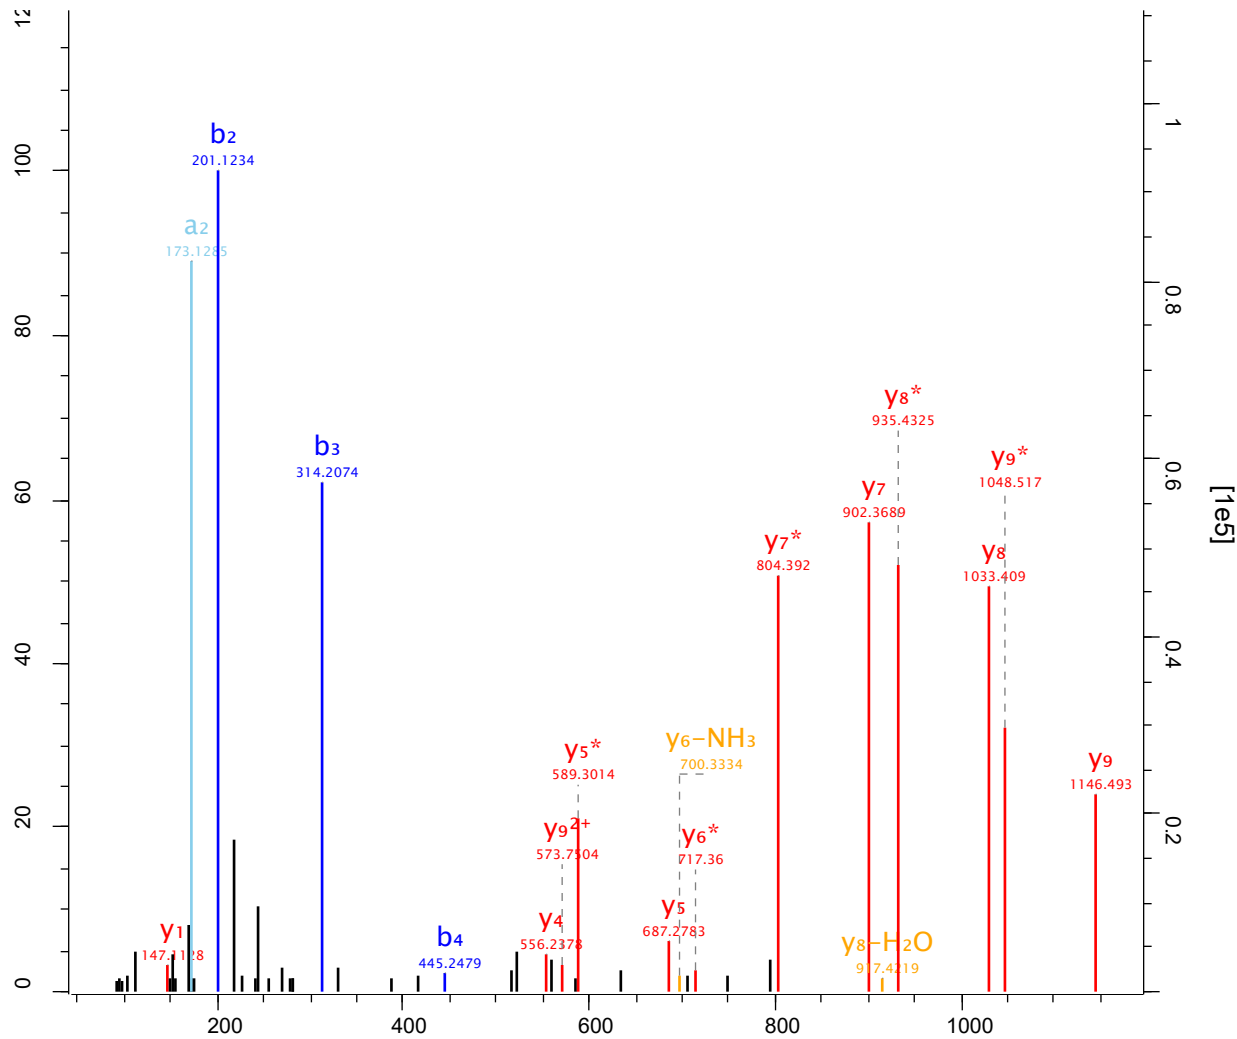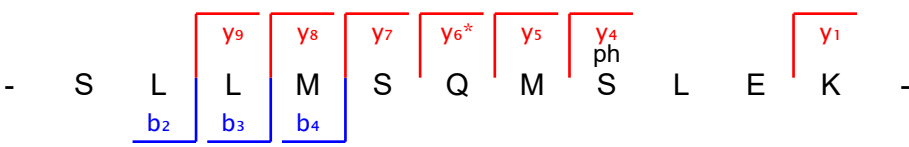

Raw file Scan Method Score m/z  
 sys\_05\_2 31487 FTMS; HCD 109.79 667.26

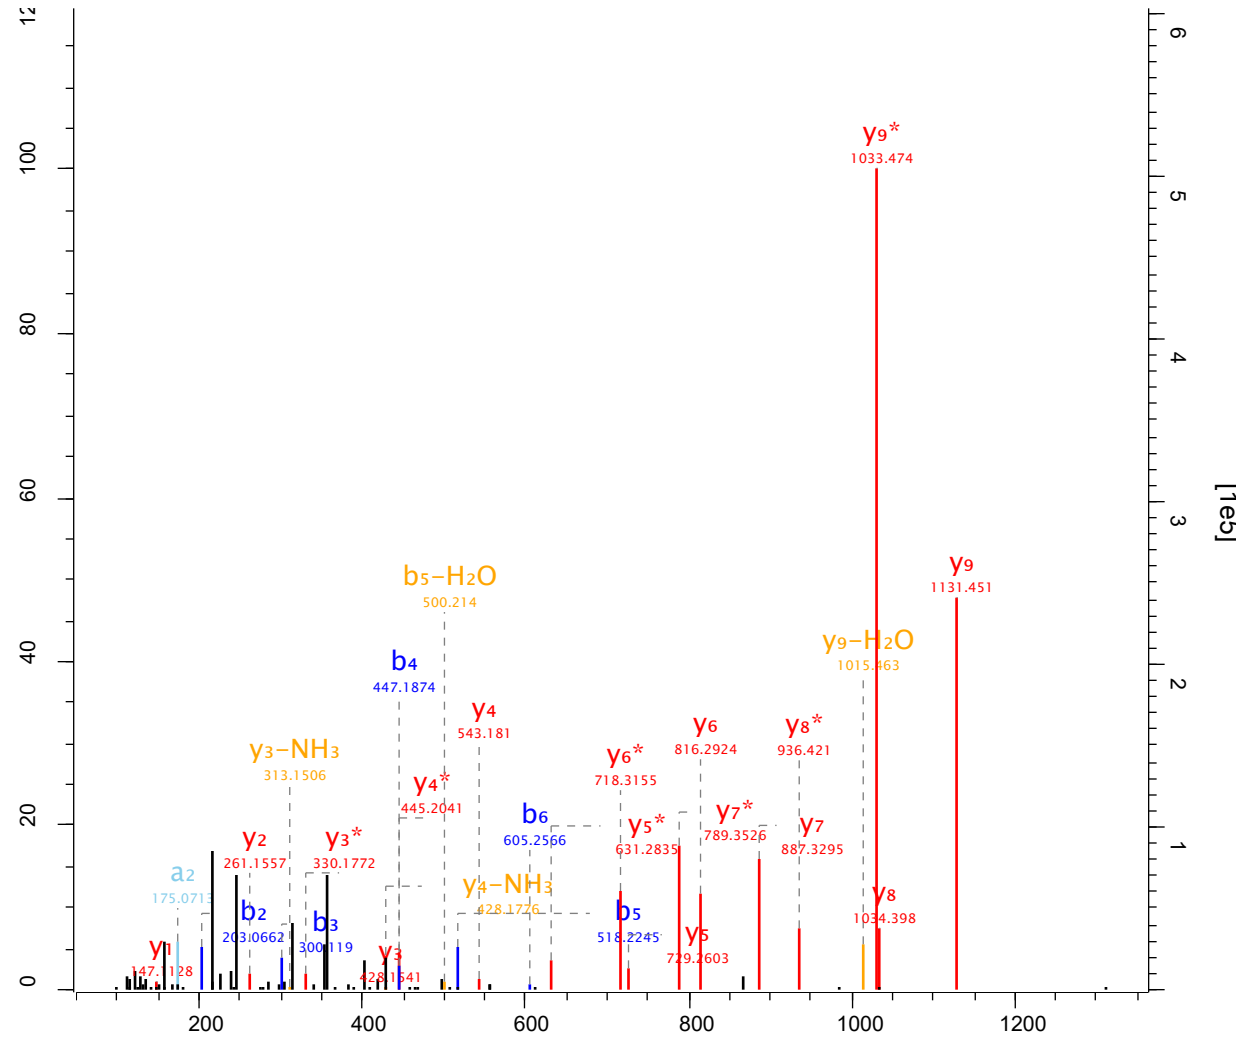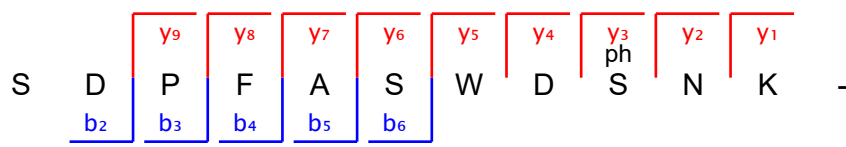

Raw file Scan Method Score m/z  
 sys\_05\_2 31591 FTMS; HCD 47.55 732.83

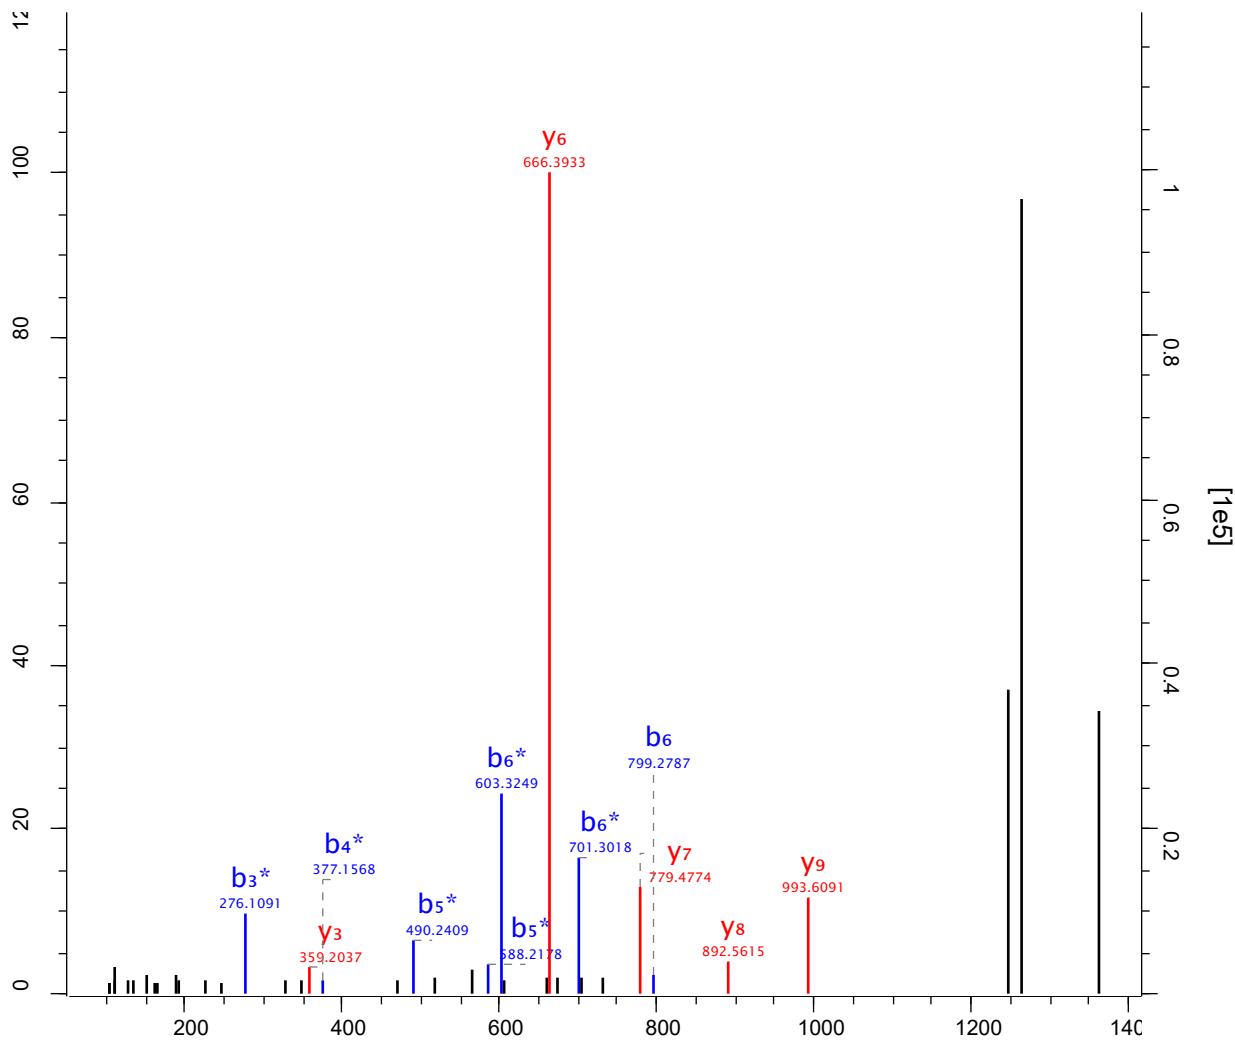

ph S ph S H T L L P P L P S R -  
 b3\* b4\* b5\* b6 y9 y8 y7 y6 y3

Raw file Scan Method Score m/z  
 sys\_05\_2 31802 FTMS; HCD 66.02 664.3

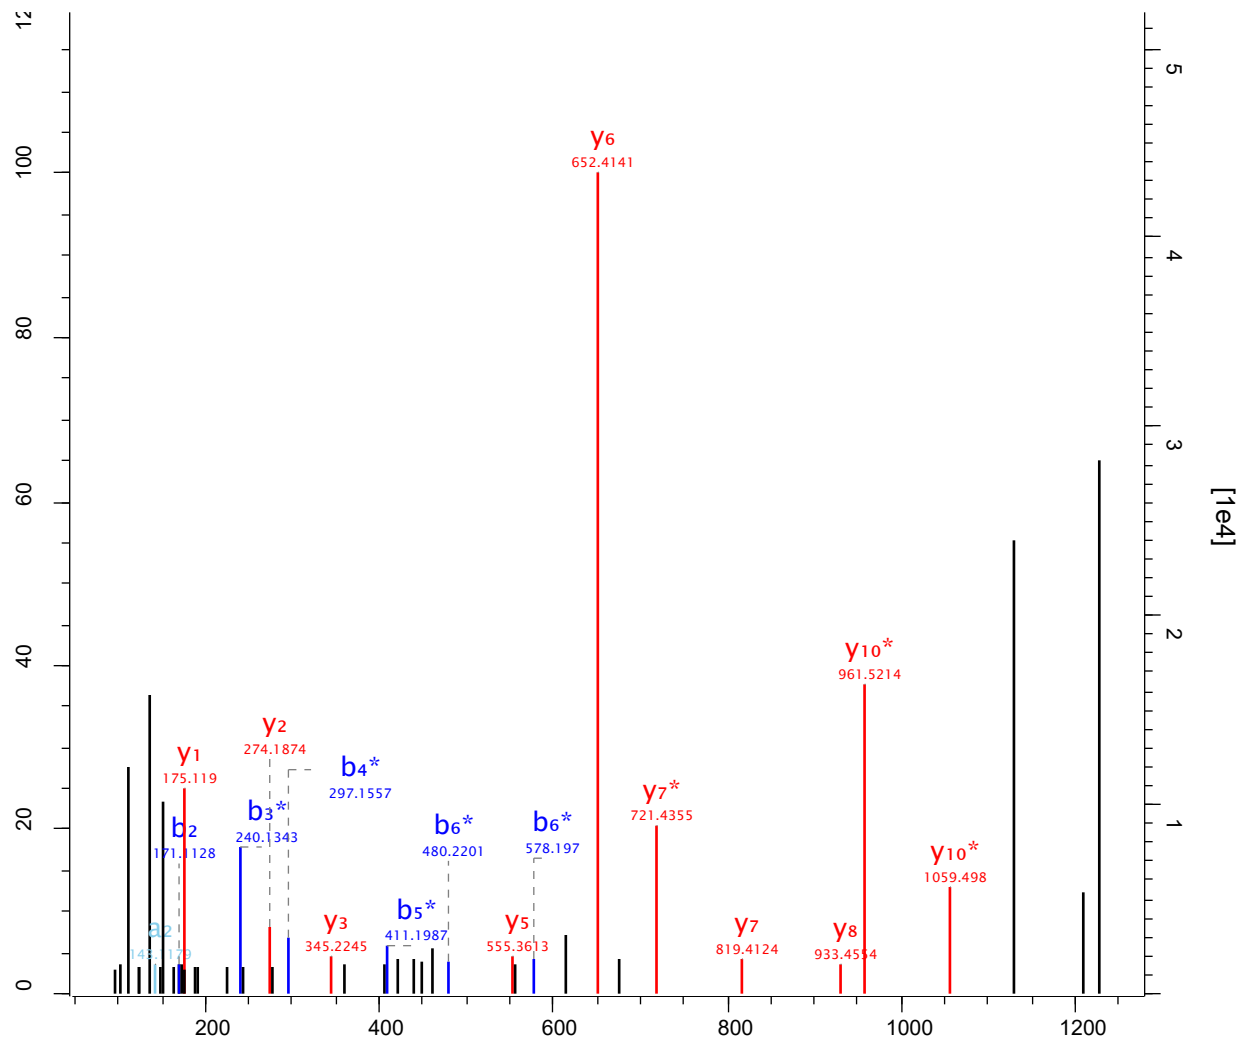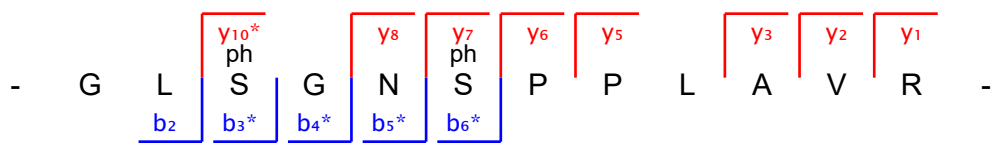

Supplement: 143488_2_supp_337932_ps5hgk.pdf [file 143488_2_supp_337932_ps5hgk.pdf]
