# Supplementary material for: The Systemin Signaling Cascade As Derived from Time Course Analyses of the Systemin-responsive Phosphoproteome
Source: PubMed Central journal article supplement (PMC6683004; doi:10.1074/mcp.ra119.001367), 2019-05-28

**Supplementary Figure 2:** Representative annotated spectra of identified phosphopeptides under systemin,A17 and water treatment as exported from MaxQuant.

Raw file Scan Method Score m/z  
 sys\_05\_2 31849 FTMS; HCD 160.81 696.34

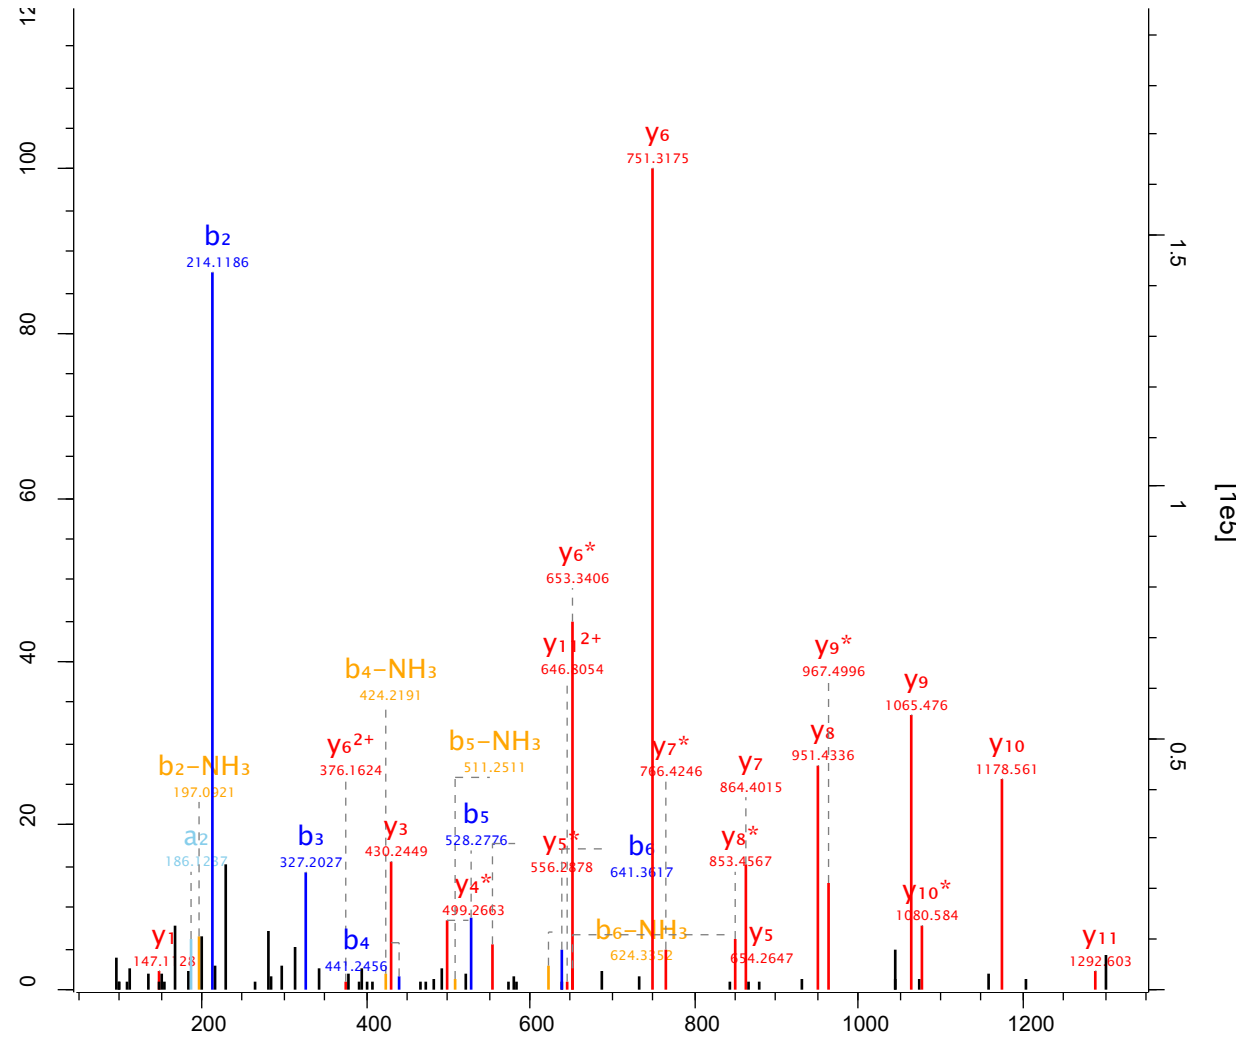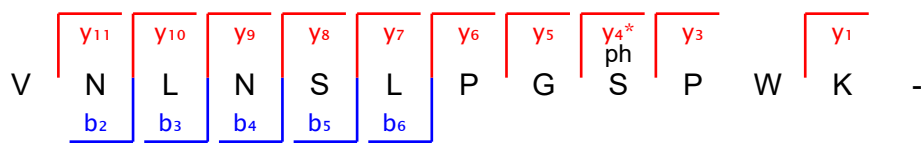

Raw file Scan Method Score m/z  
 sys\_05\_2 31871 FTMS; HCD 62.2 813.86

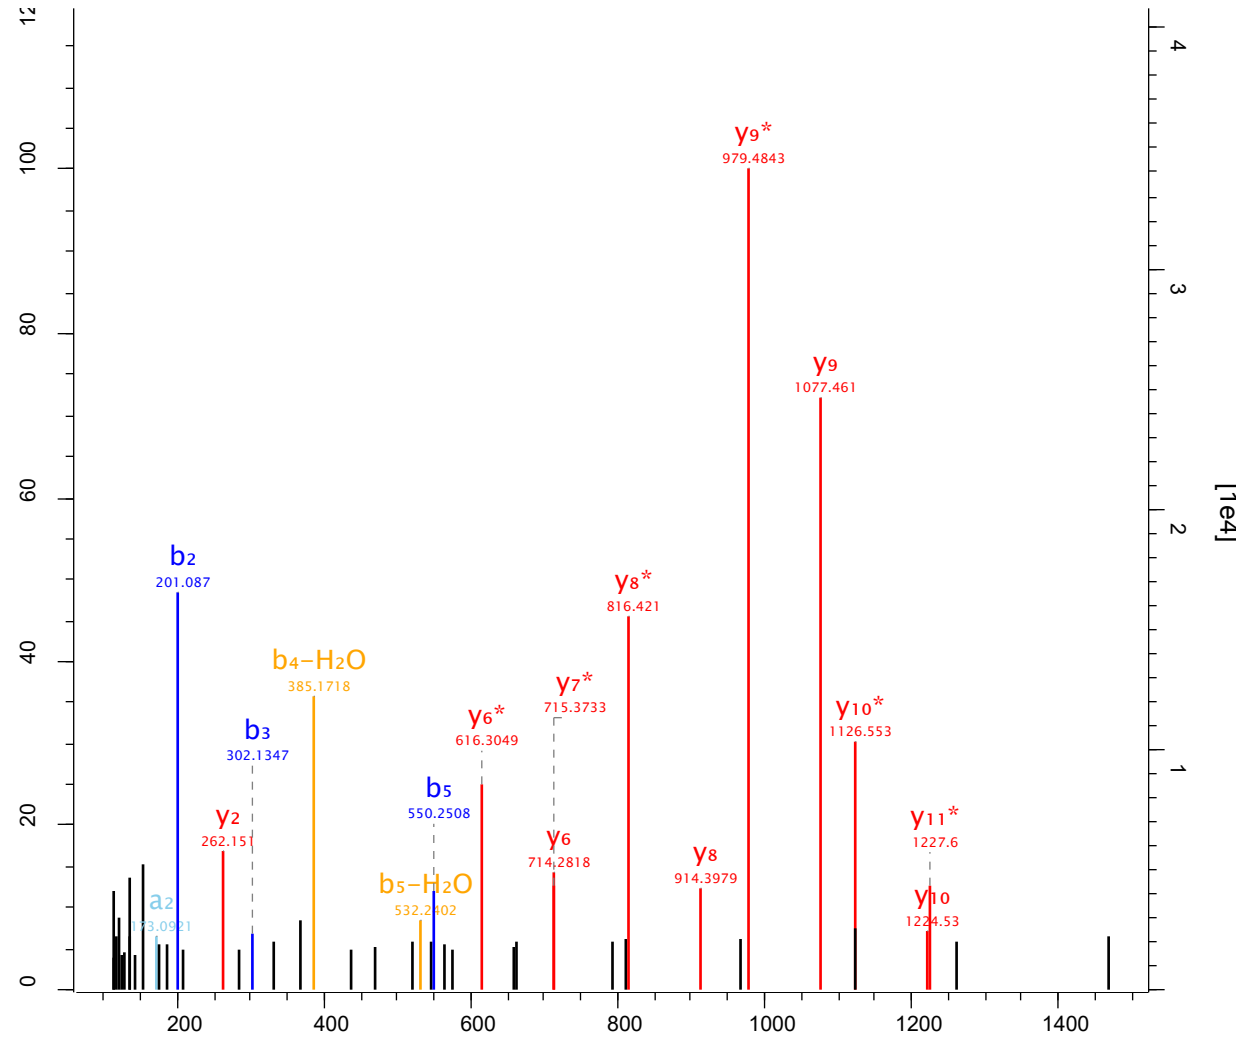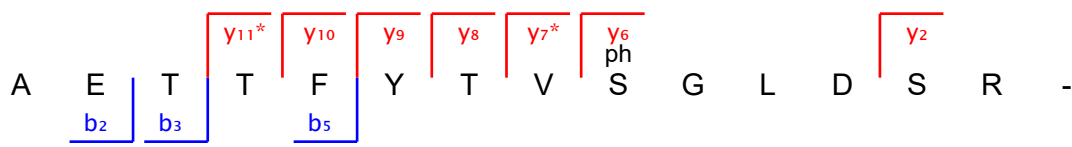

Raw file Scan Method Score m/z  
 sys\_05\_2 32079 FTMS; HCD 72.68 677.98

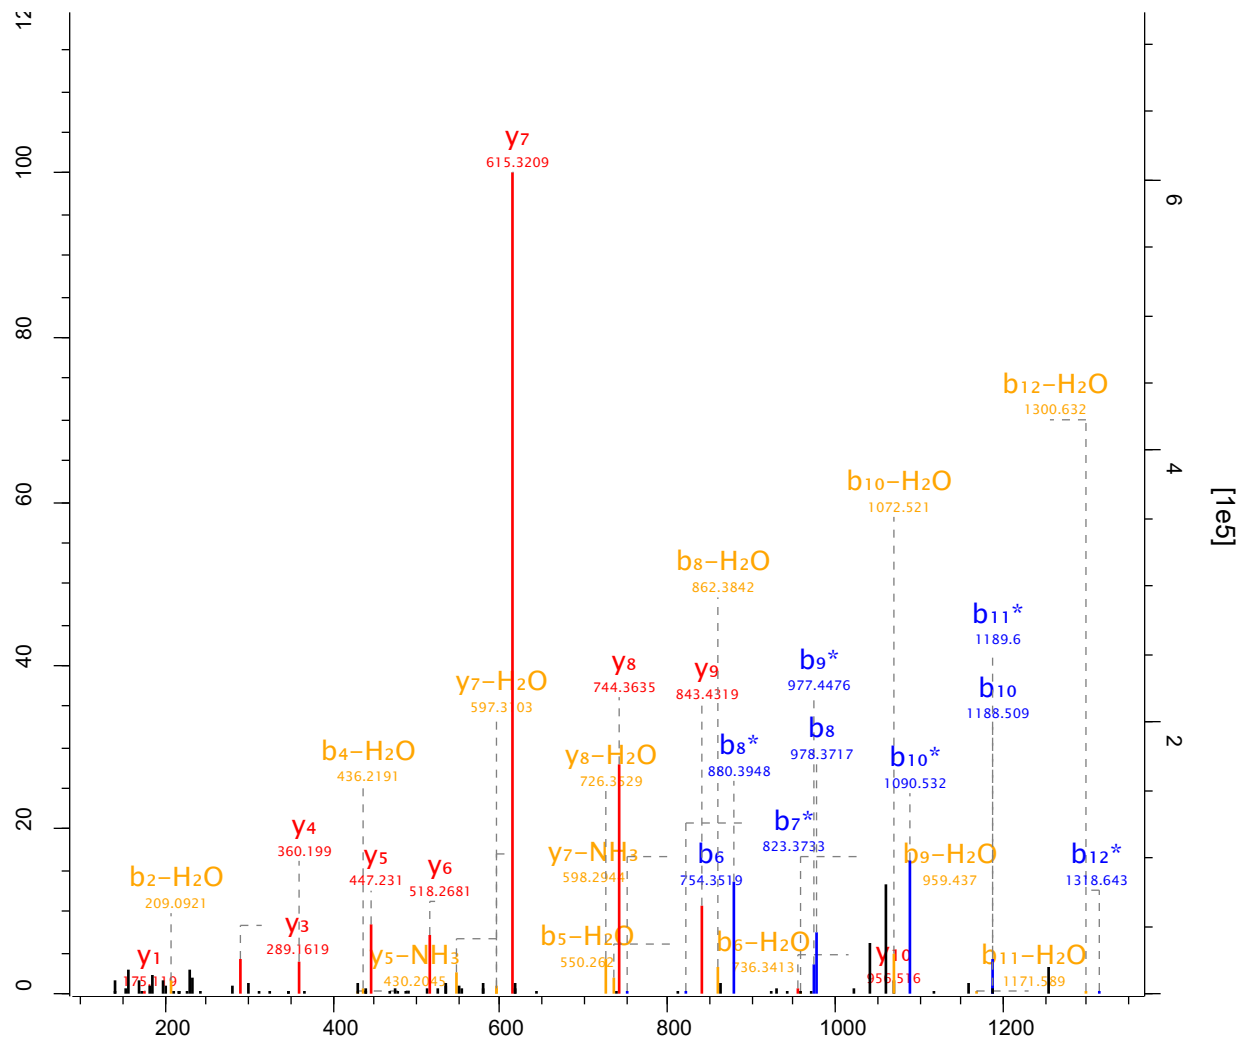

- E P V Q N W S G P L V E P A S  
 b6 b7\* b8 b9\* b10 b11\* b12\*  
 y4 y3 y1  
 A G G R -



Raw file Scan Method Score m/z  
 sys\_05\_2 32203 FTMS; HCD 223.93 802.34

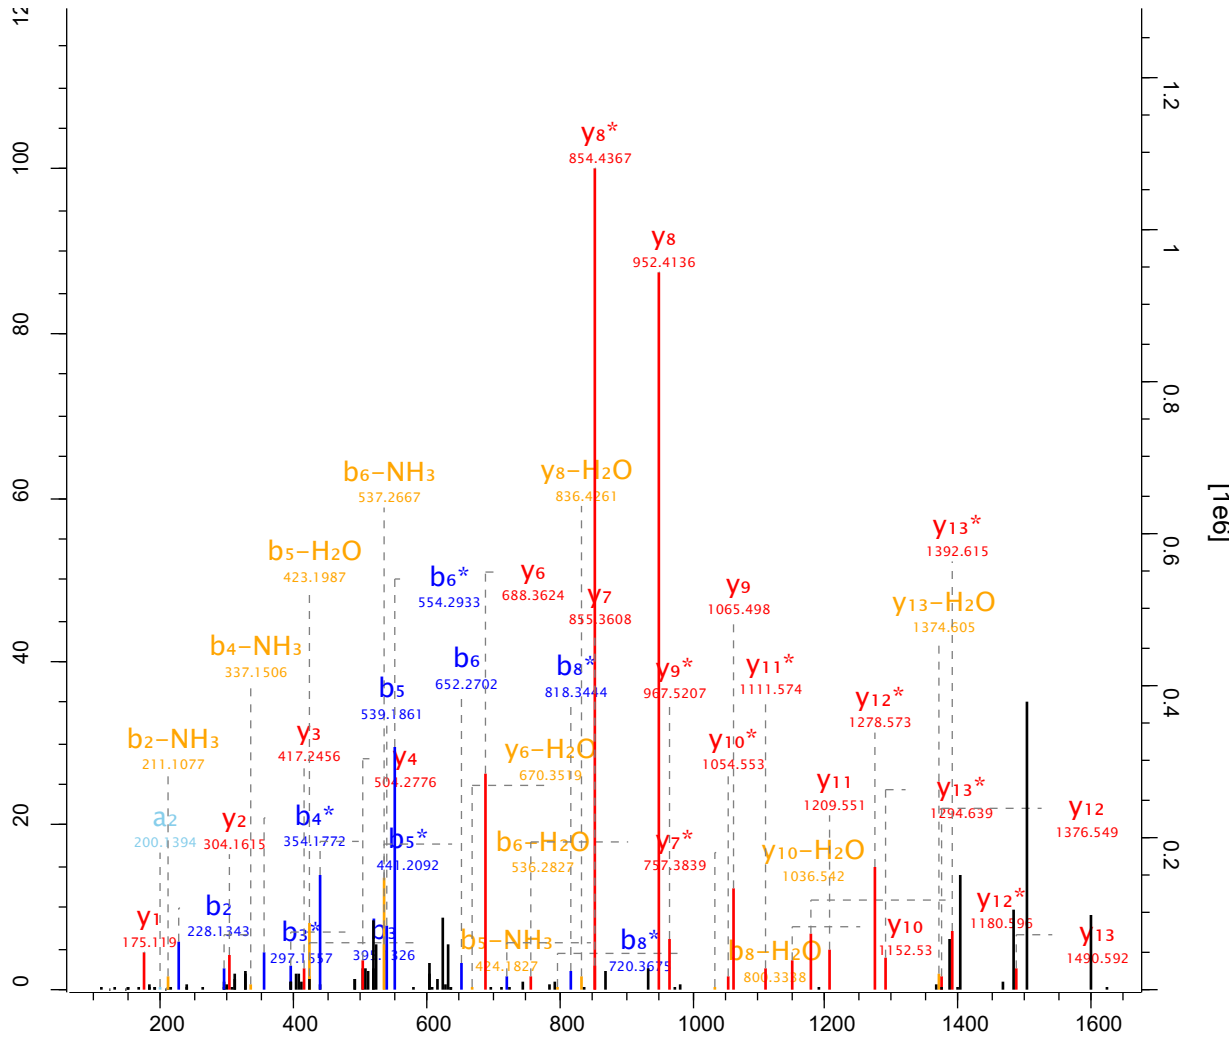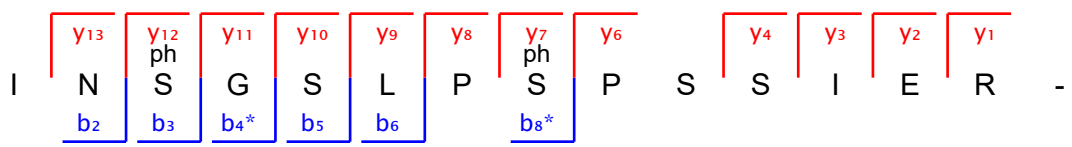

Raw file Scan Method Score m/z  
 sys\_05\_2 32263 FTMS; HCD 215.51 722.33

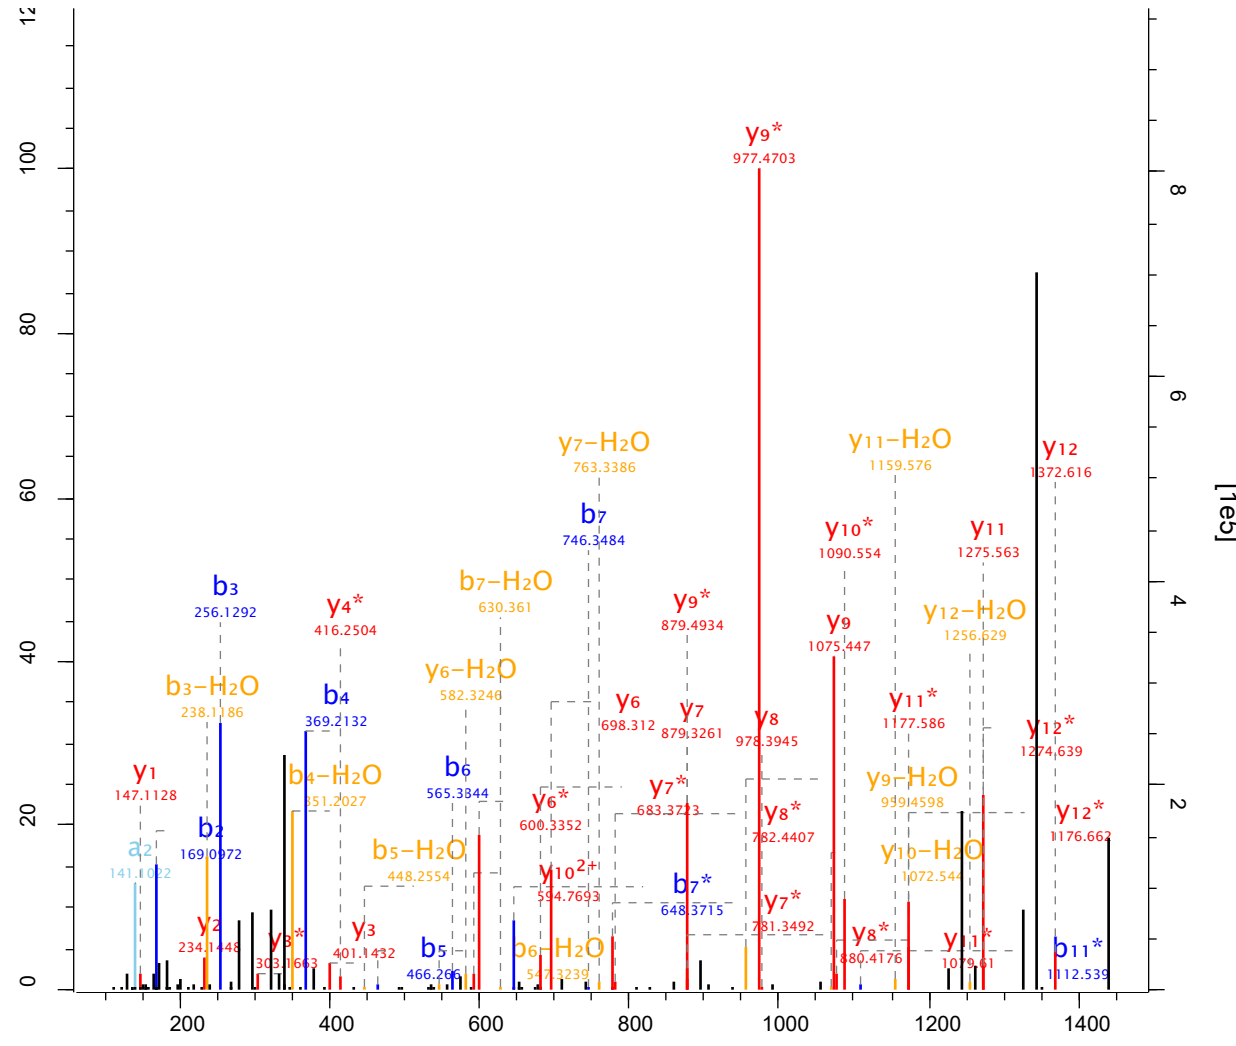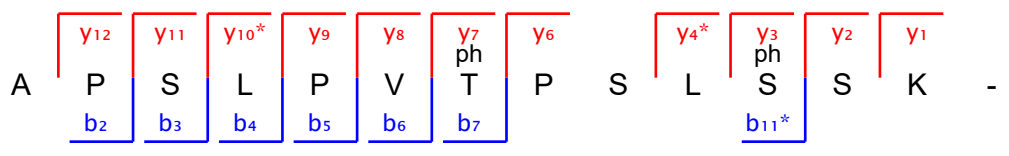

Raw file Scan Method Score m/z  
 sys\_05\_2 32348 FTMS; HCD 125.41 719.82

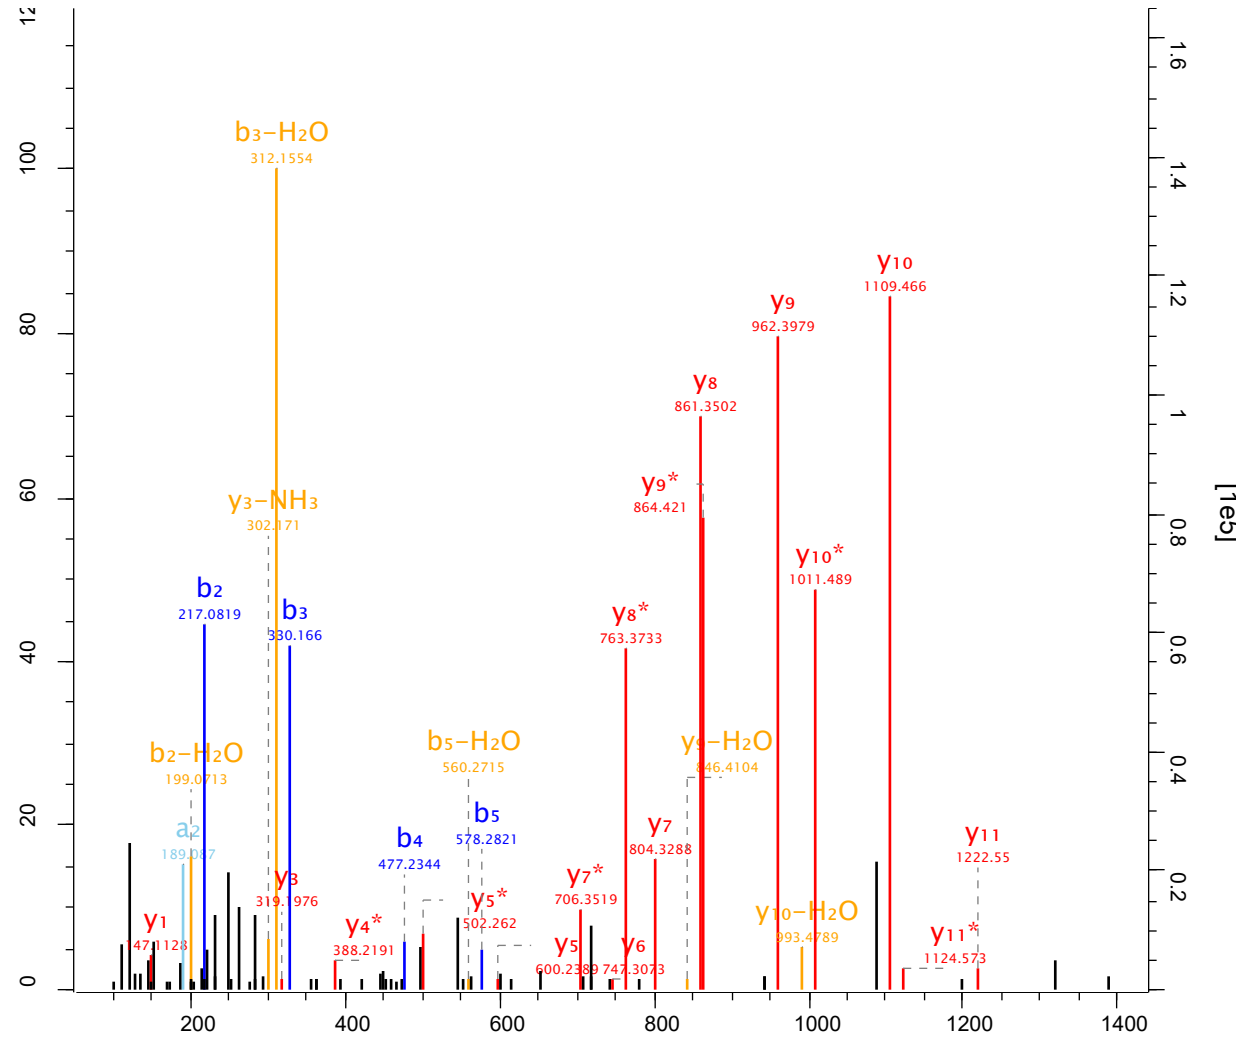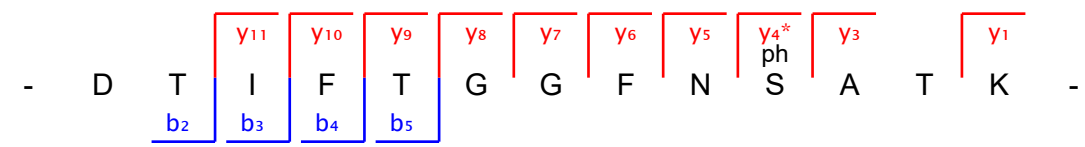

Raw file Scan Method Score m/z  
 sys\_05\_2 32375 FTMS; HCD 44.44 696.81

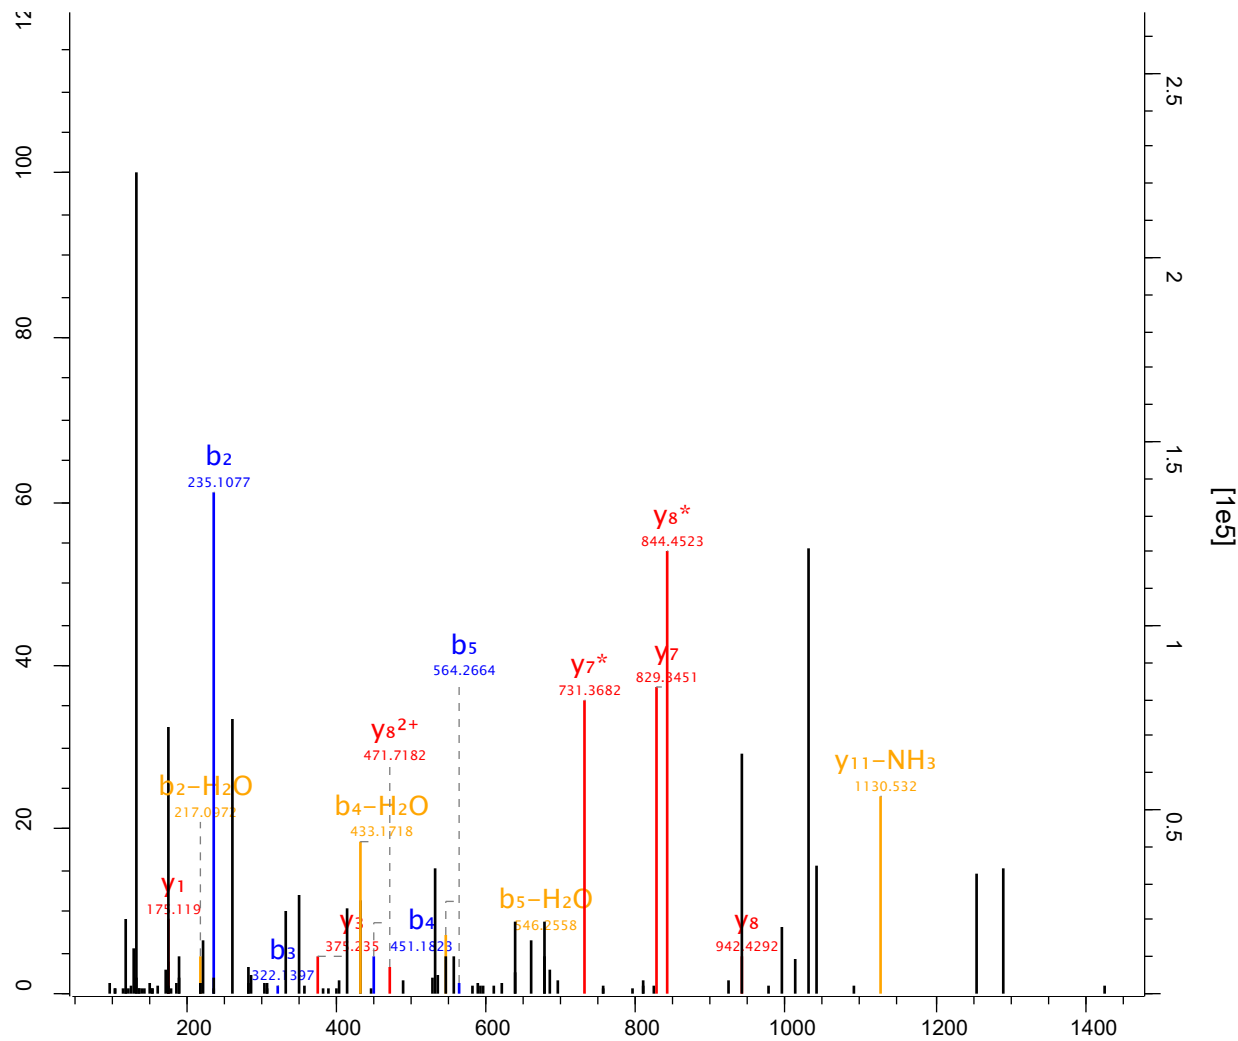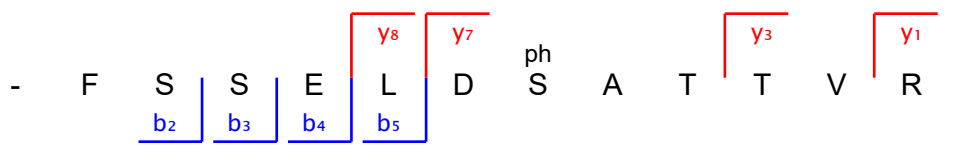

Raw file Scan Method Score m/z  
 sys\_05\_2 32652 FTMS; HCD 65.02 958.92

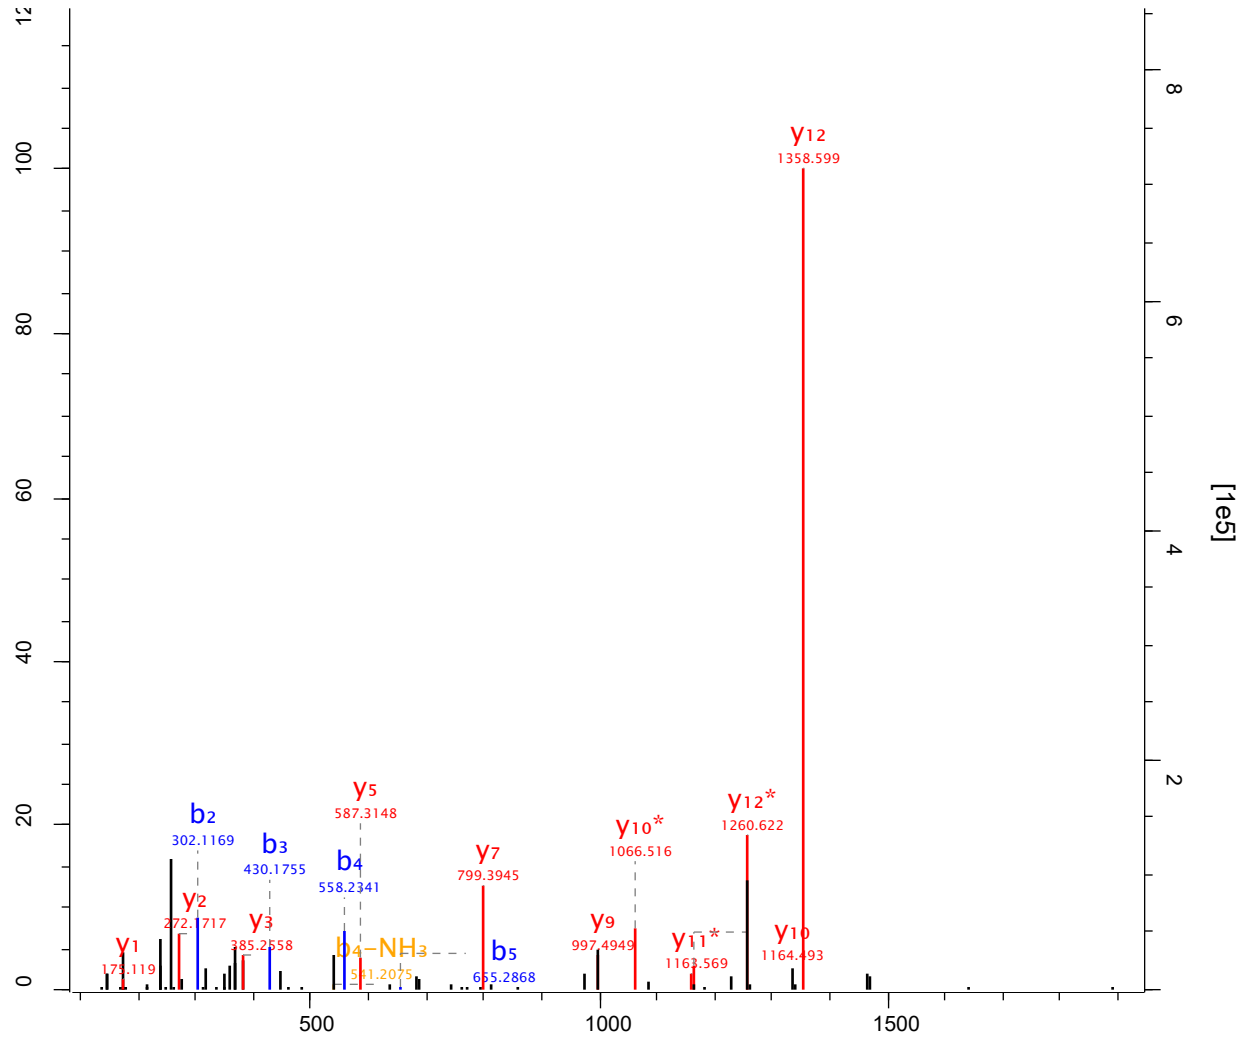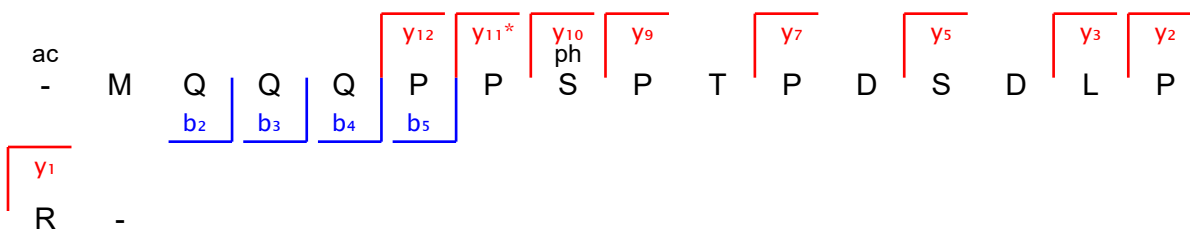

Raw file Scan Method Score m/z  
 sys\_05\_2 32749 FTMS; HCD 54.76 789.35

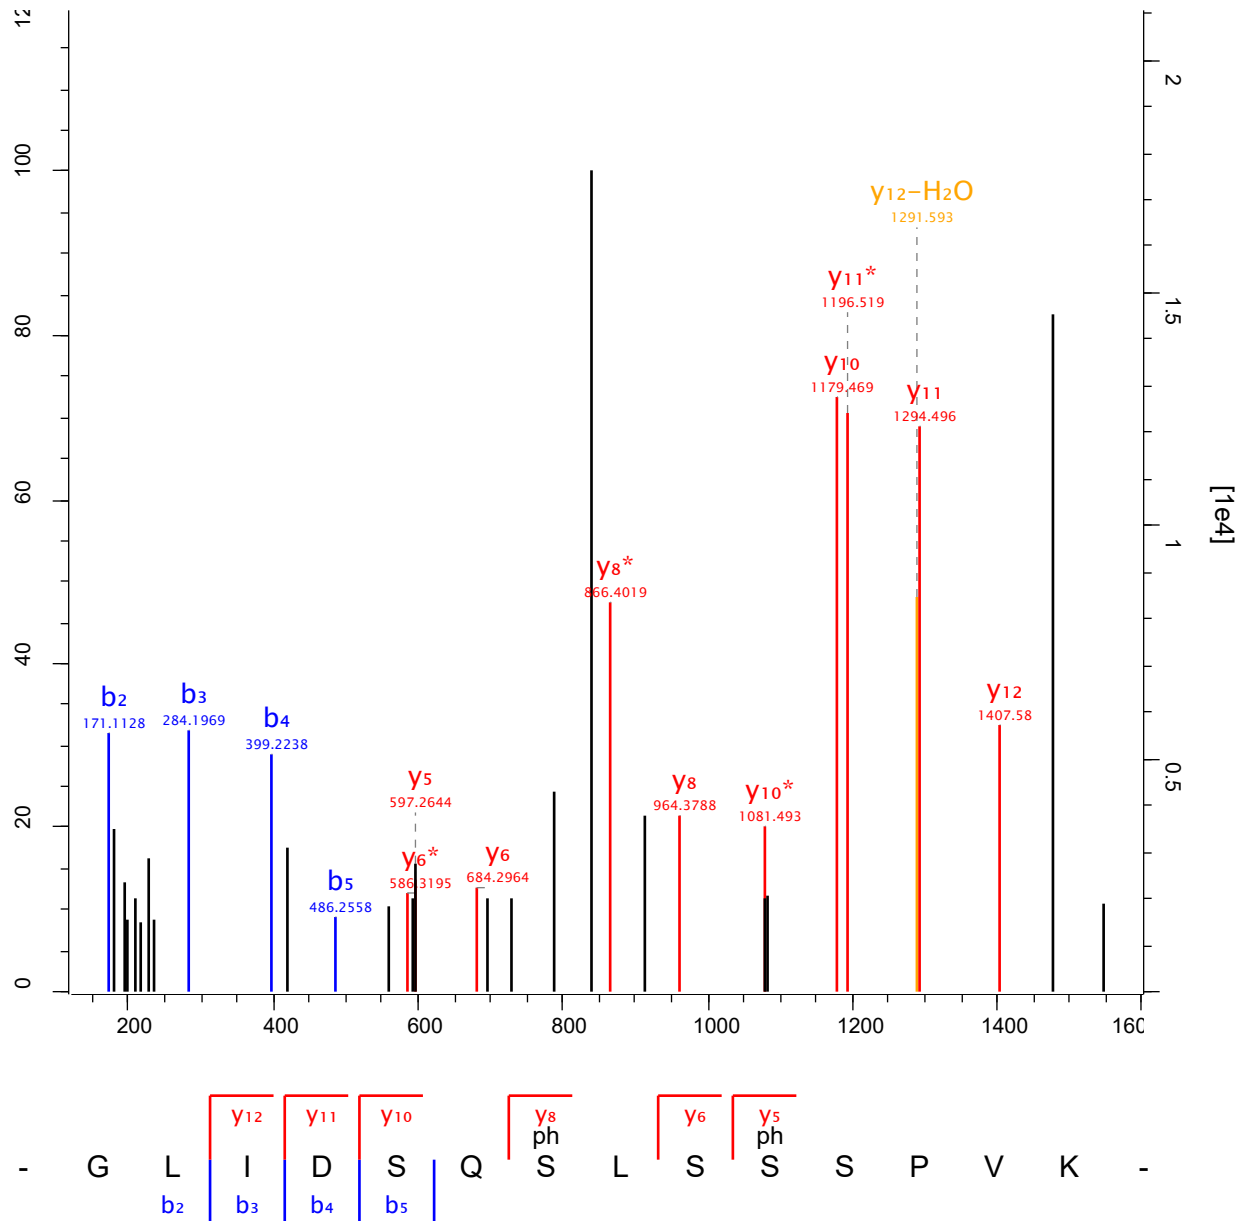

Raw file Scan Method Score m/z  
 sys\_05\_2 32799 FTMS; HCD 110.44 729.84

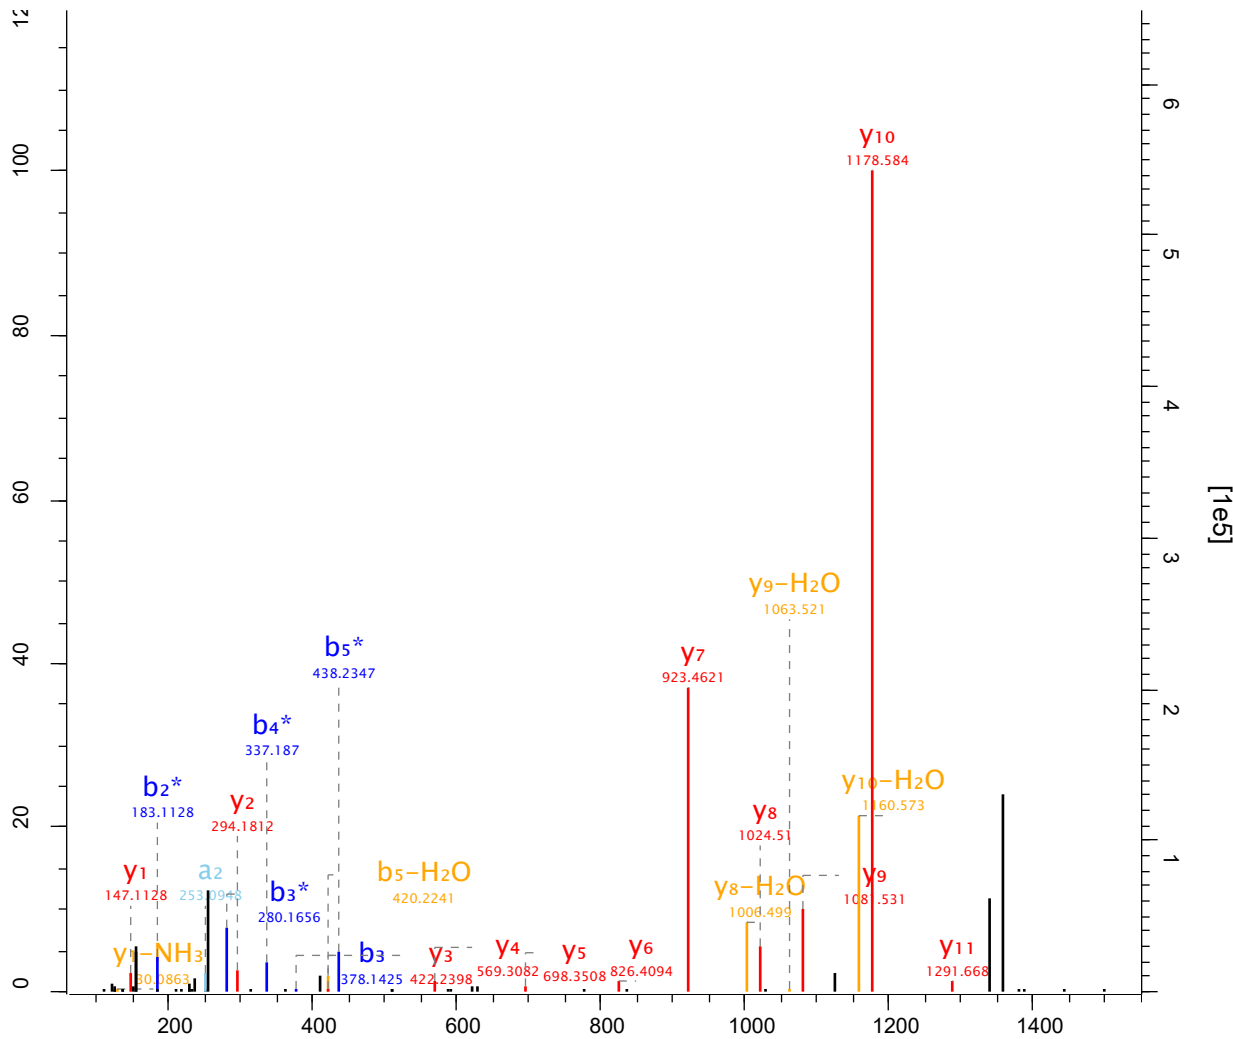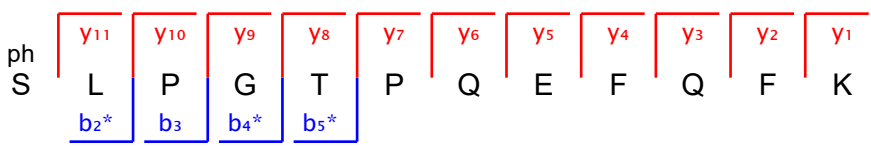

Raw file Scan Method Score m/z  
 sys\_05\_2 3295 FTMS; HCD 52.58 633.79

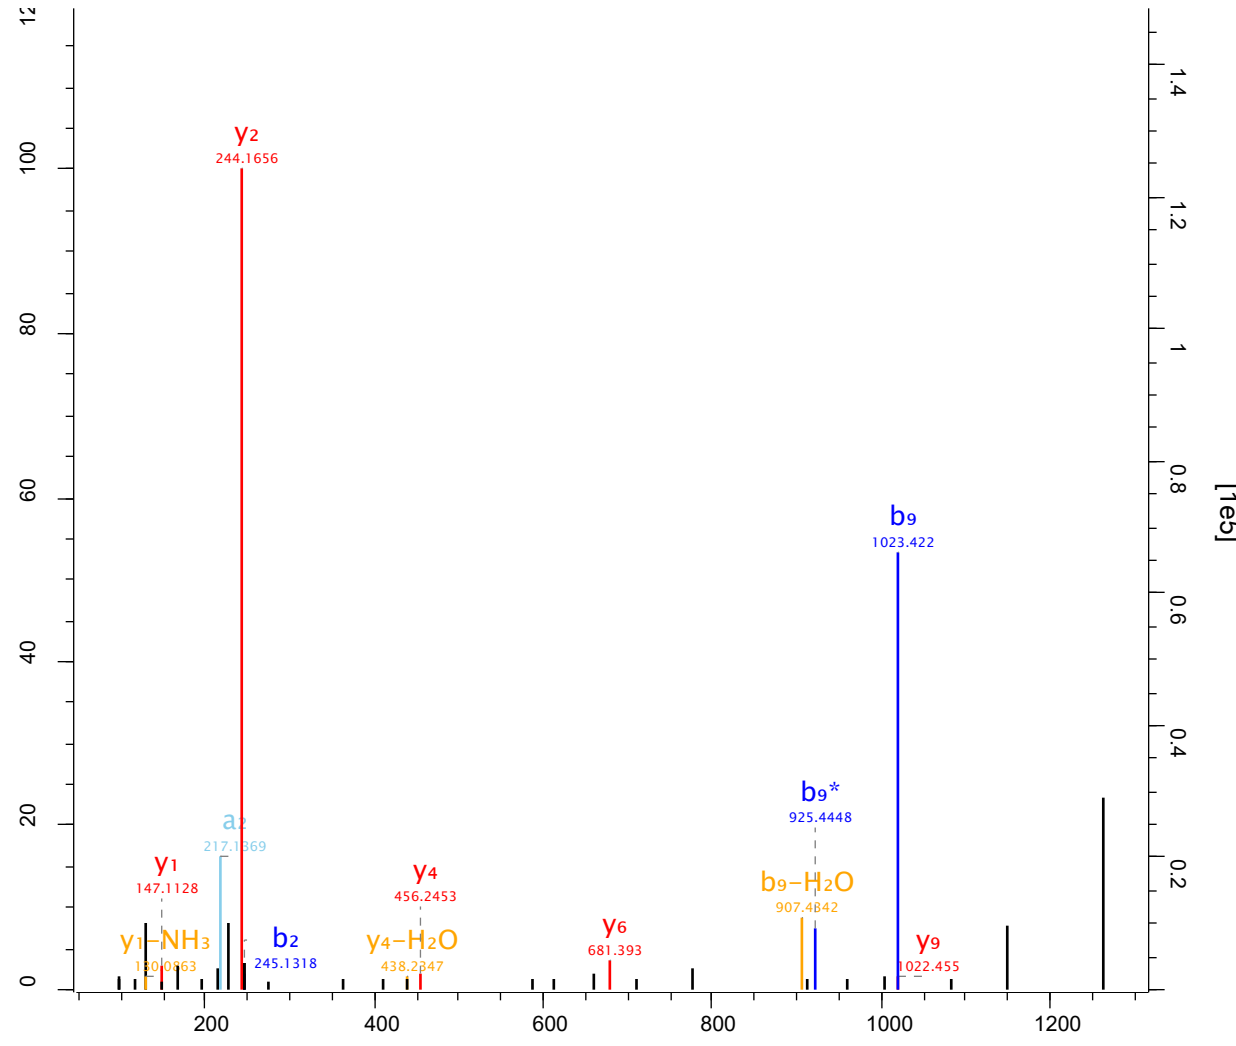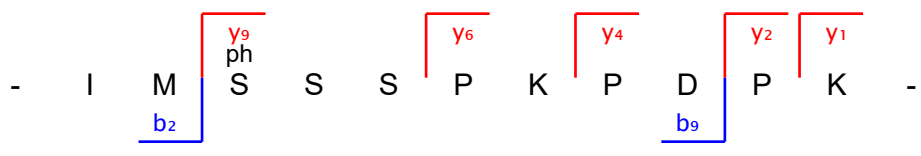



Raw file Scan Method Score m/z  
 sys\_05\_2 33063 FTMS; HCD 105.79 752.82

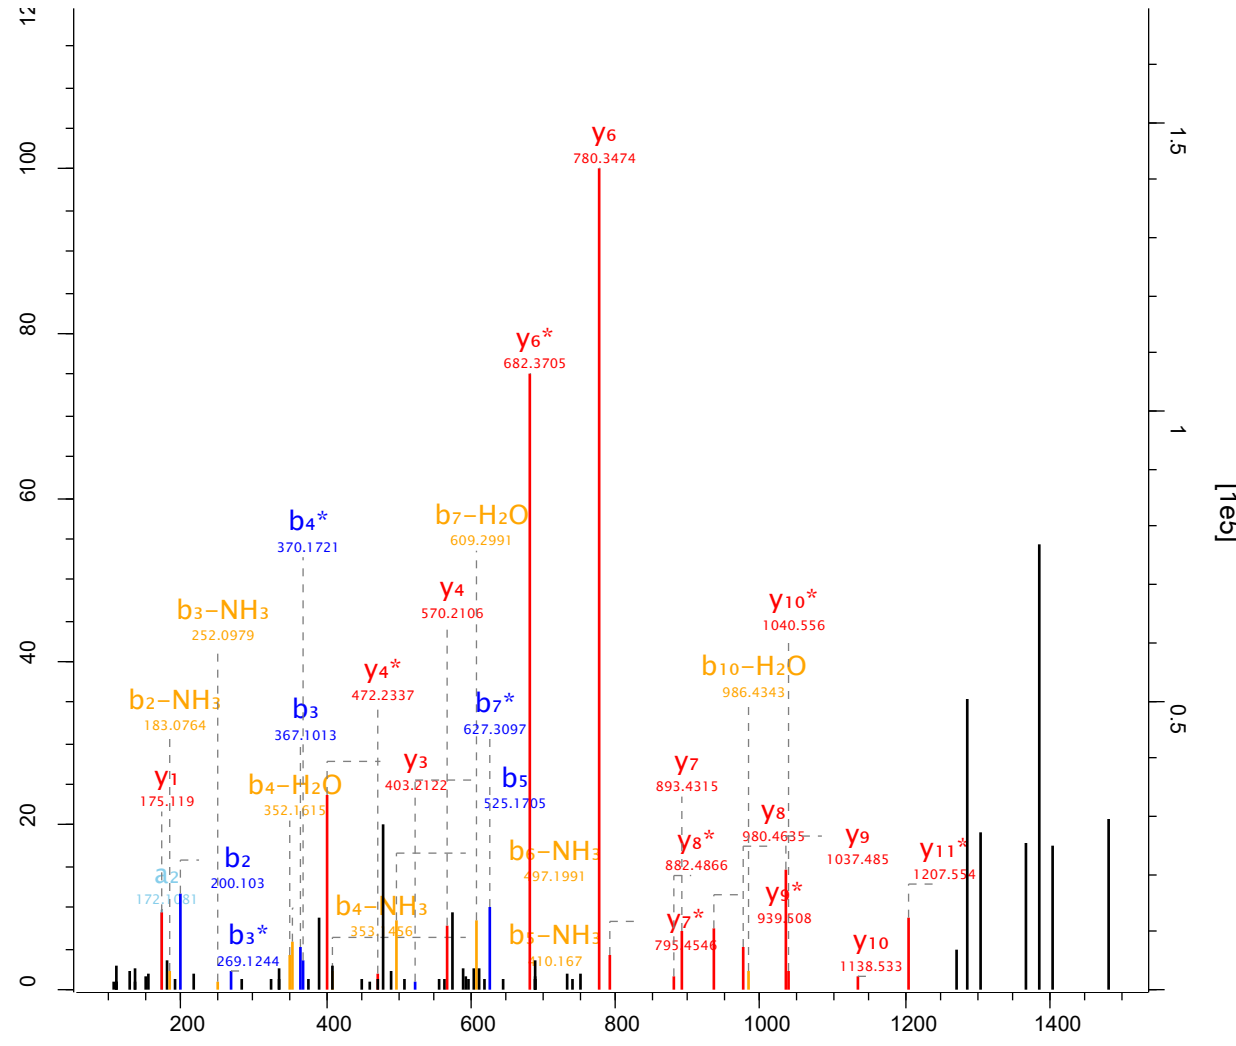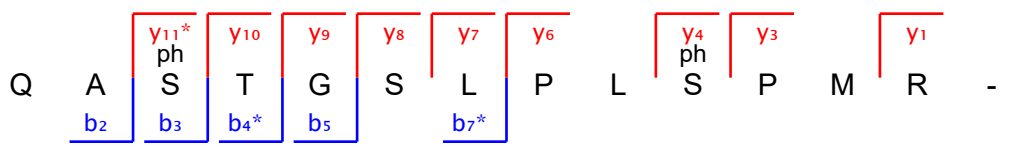

Raw file Scan Method Score m/z  
 sys\_05\_2 33199 FTMS; HCD 163.18 1023.42

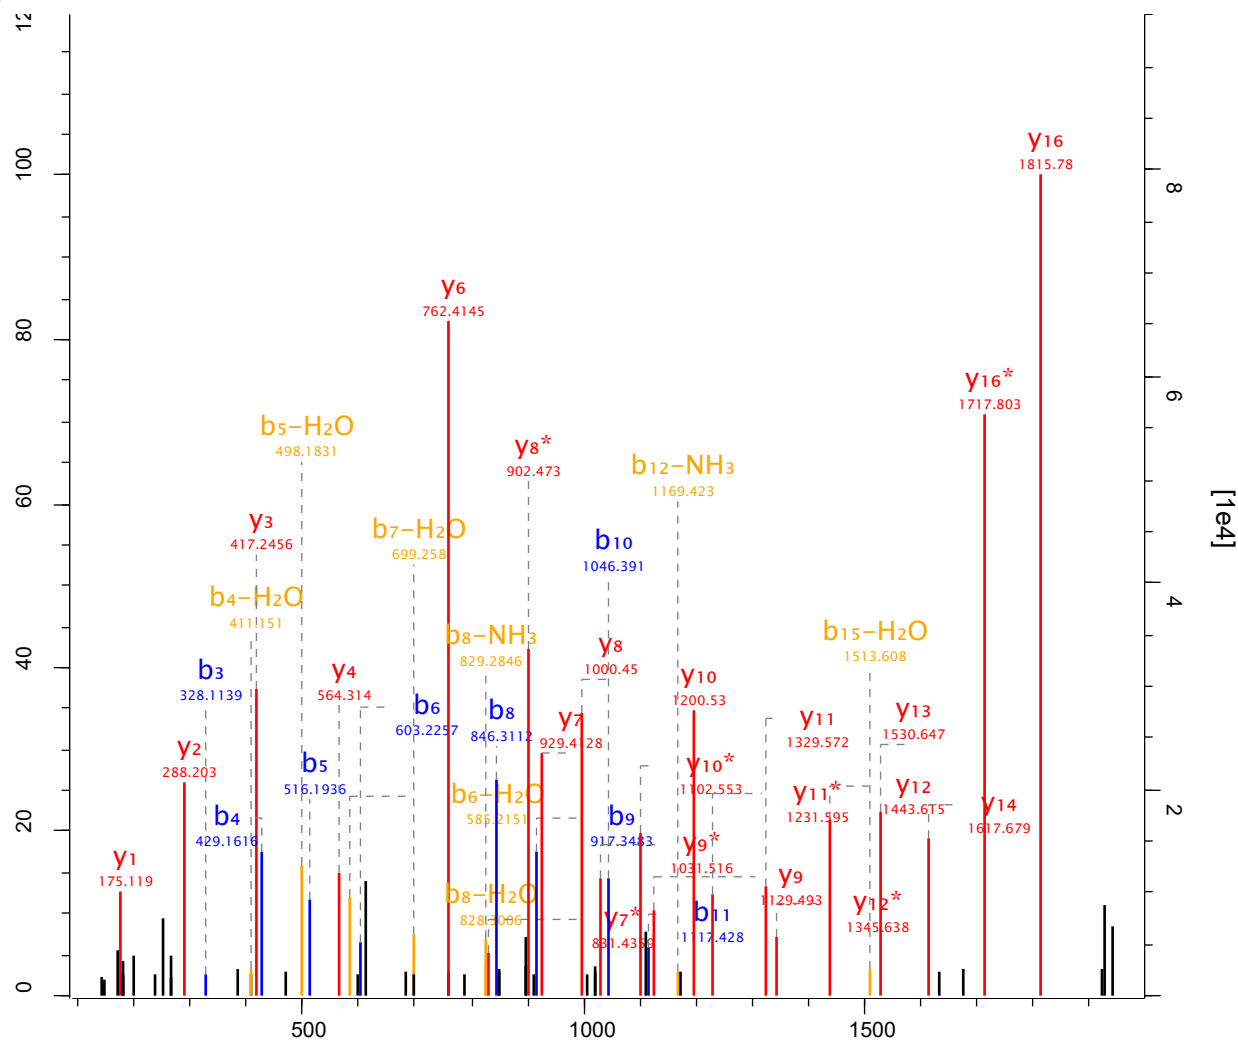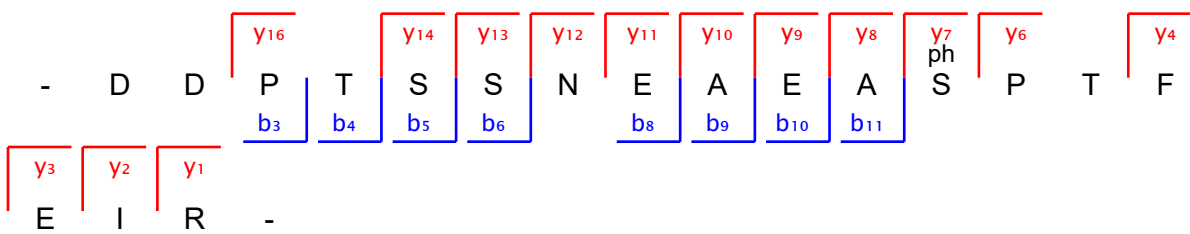

Raw file Scan Method Score m/z  
 sys\_05\_2 33301 FTMS; HCD 218.2 742.34

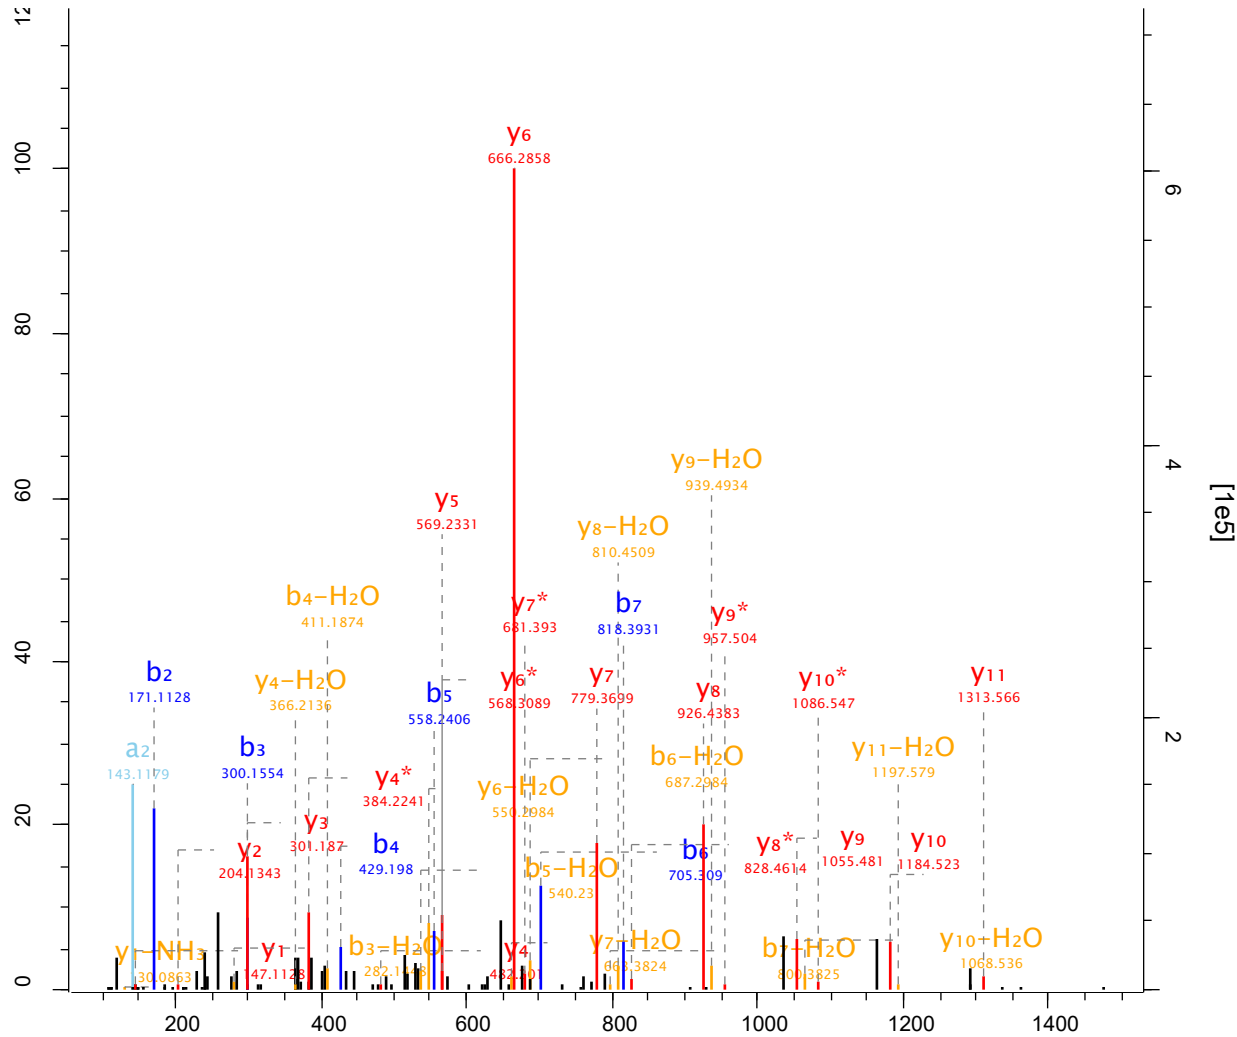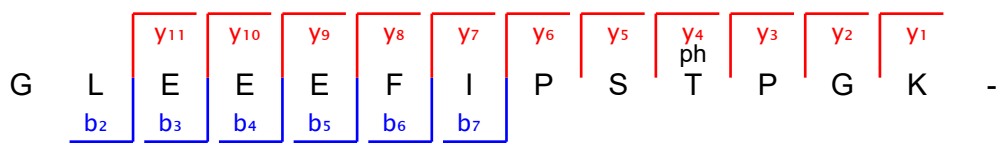

Raw file Scan Method Score m/z  
 sys\_05\_2 33521 FTMS; HCD 47.04 727.29

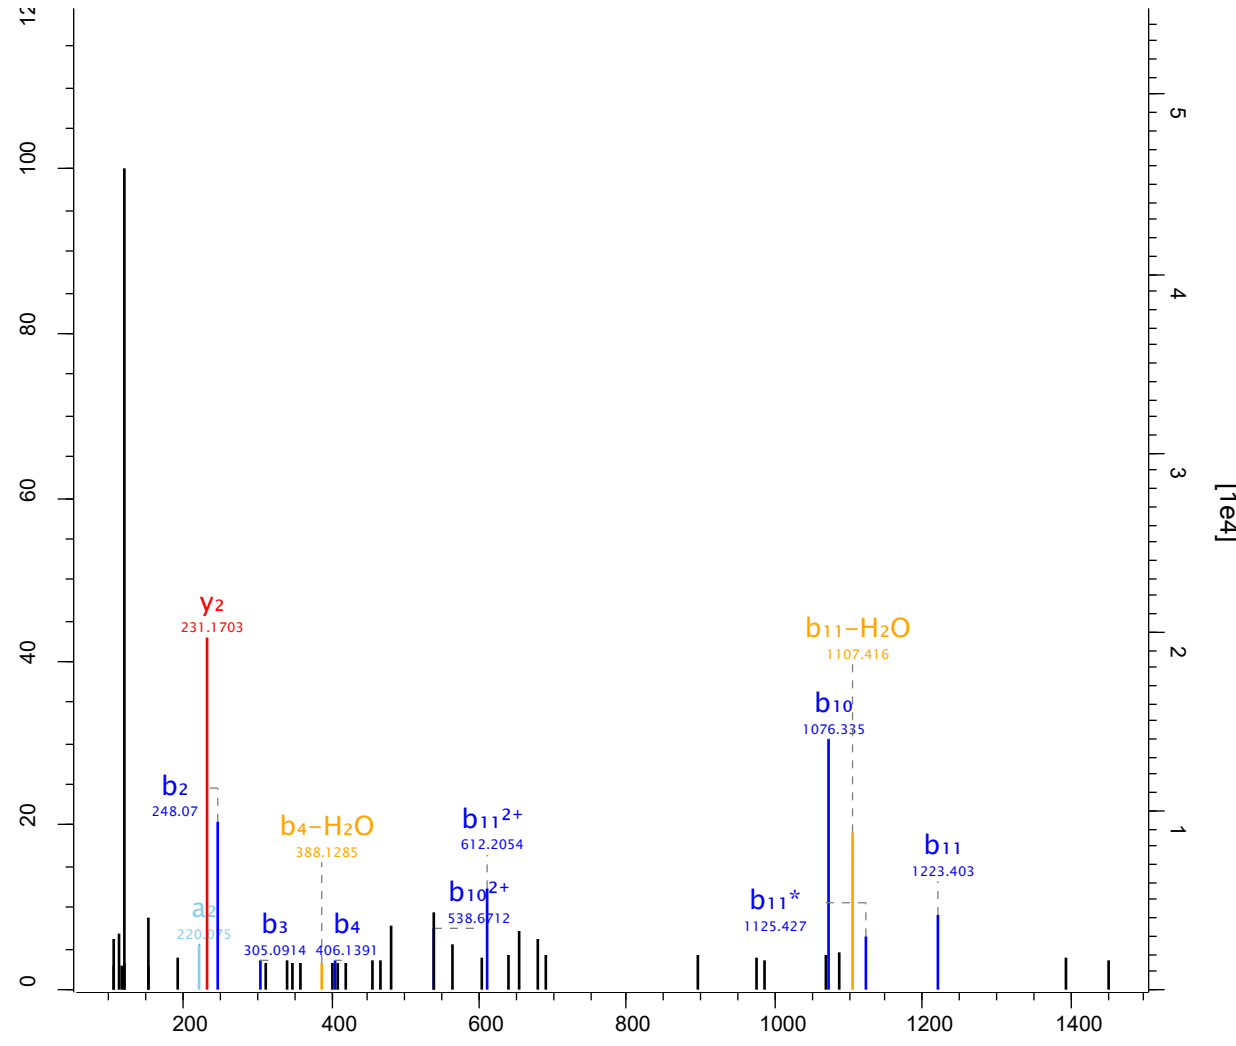

- S C G T ph S T S S N N F L V -  
 b<sub>2</sub> b<sub>3</sub> b<sub>4</sub> b<sub>10</sub> b<sub>11</sub> y<sub>2</sub>

Raw file Scan Method Score m/z  
 sys\_05\_2 33540 FTMS; HCD 104.26 741.35

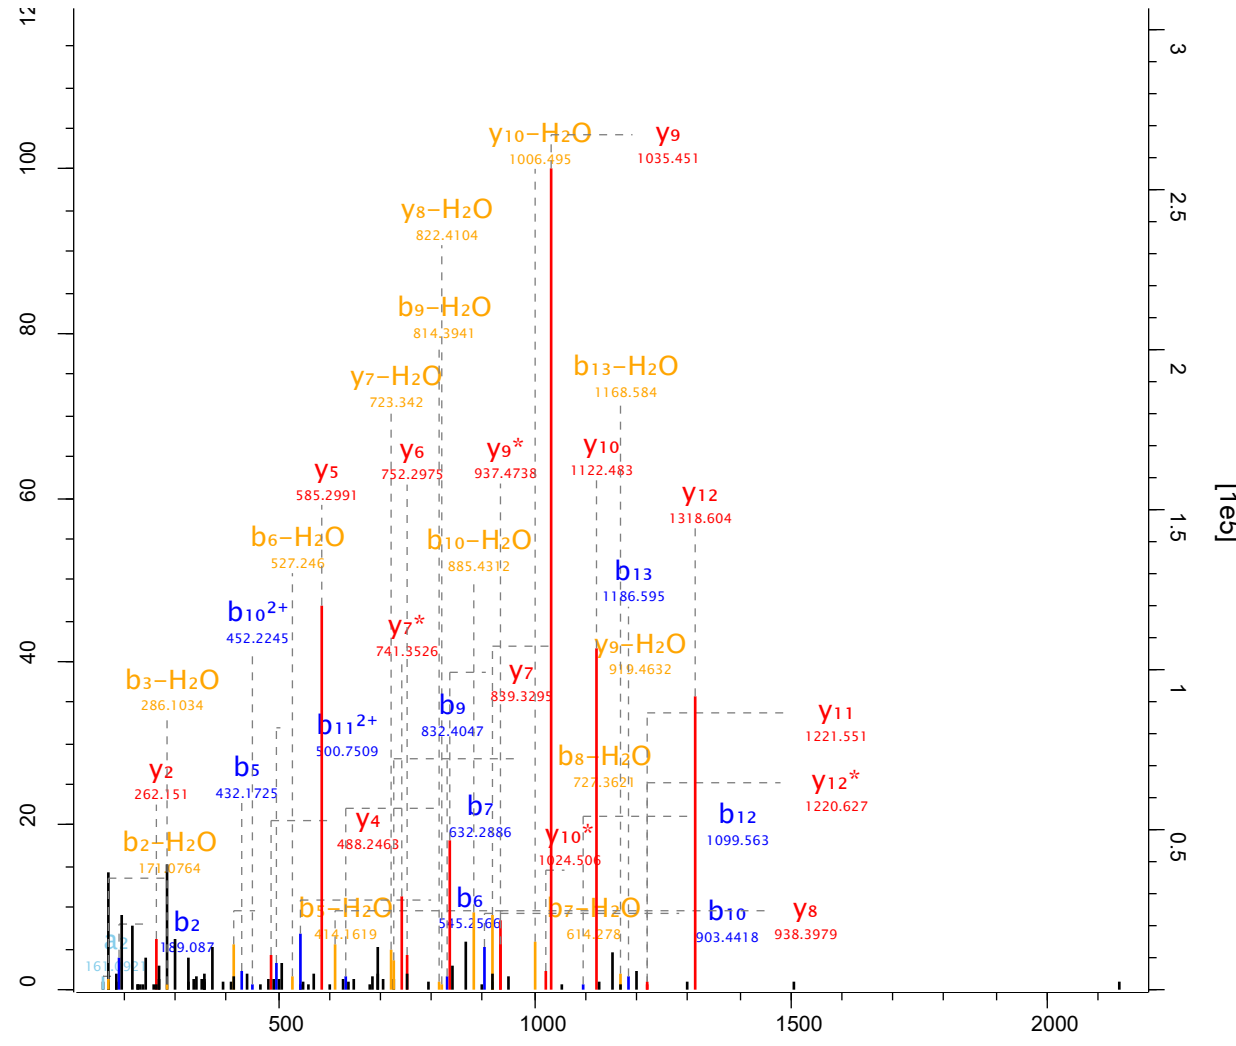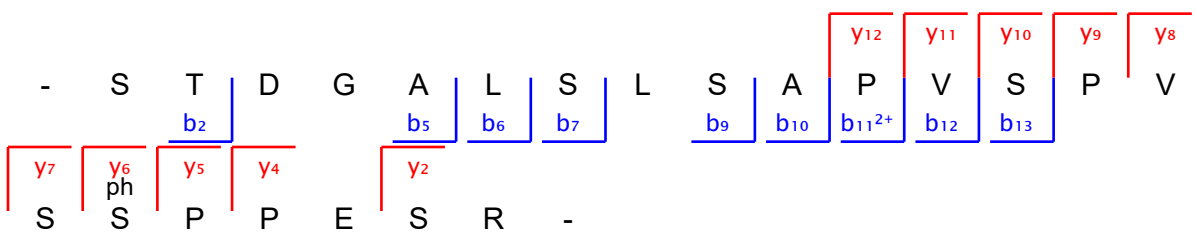

Raw file Scan Method Score m/z  
 sys\_05\_2 33583 FTMS; HCD 41.7 757.82

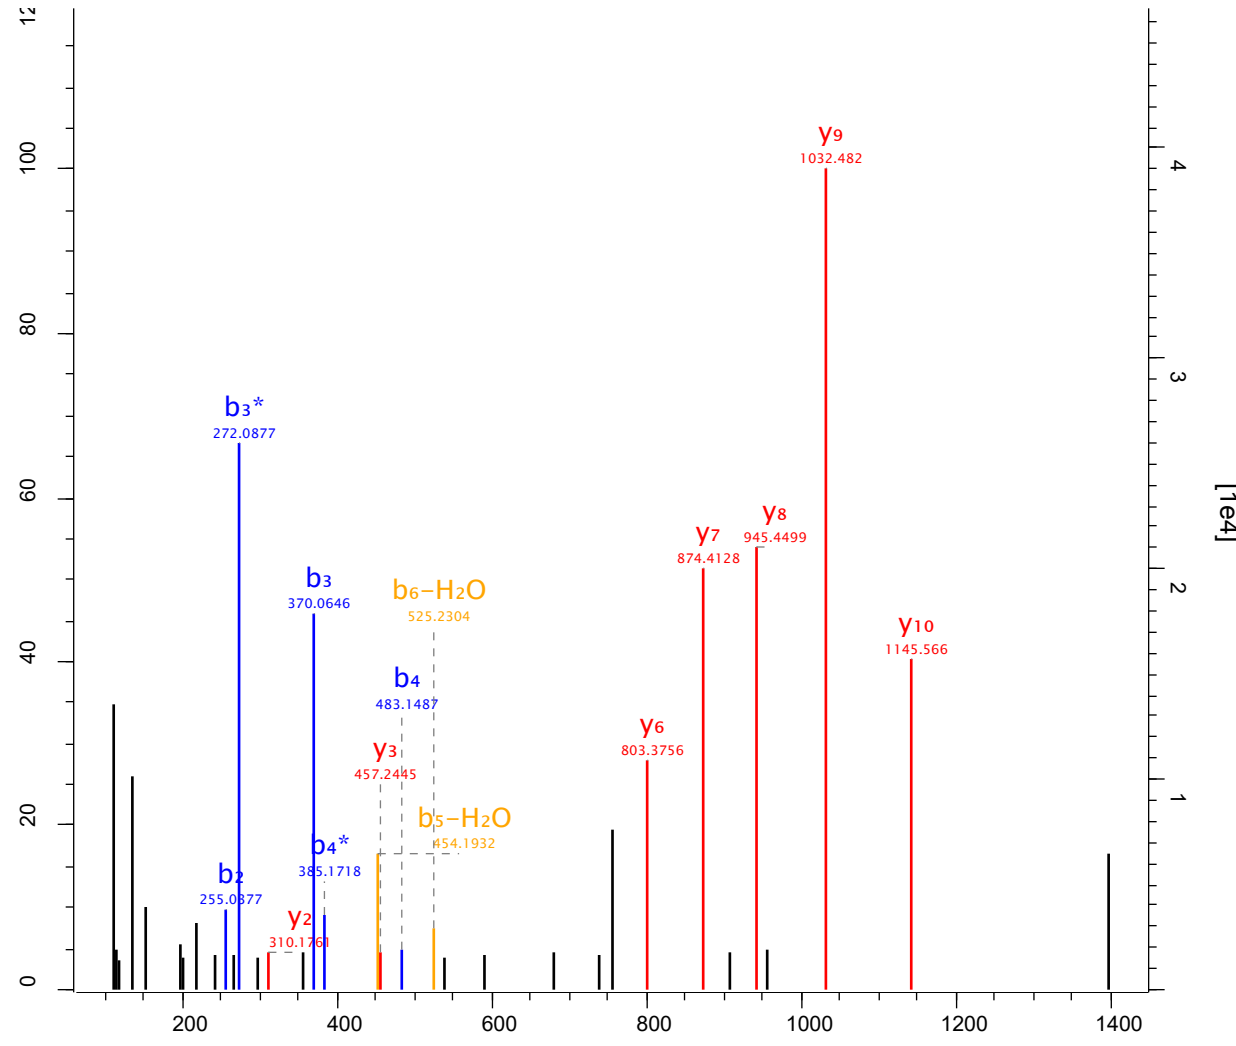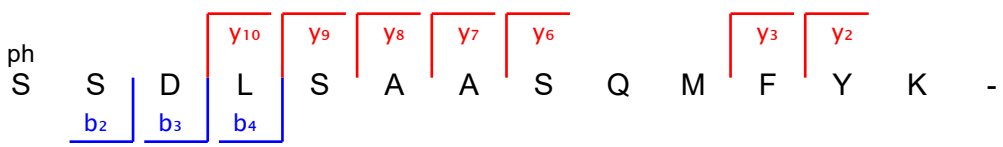

Raw file Scan Method Score m/z  
 sys\_05\_2 34587 FTMS; HCD 106.67 580.73

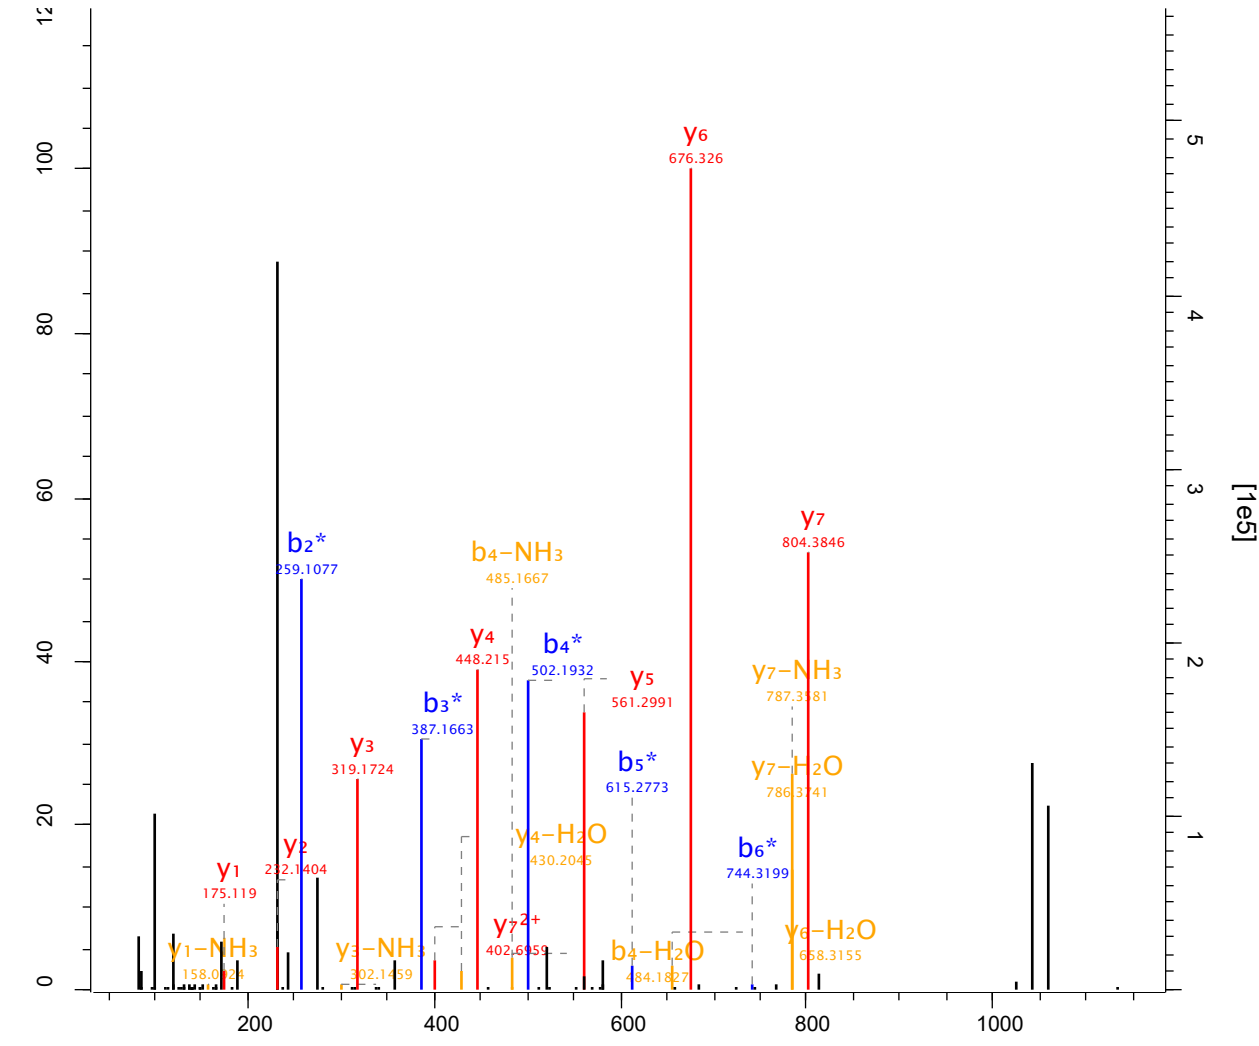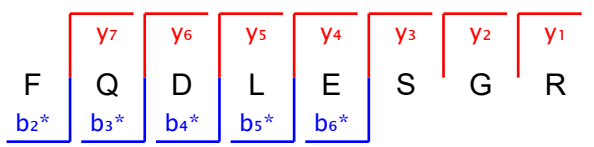

ac ph S

Raw file Scan Method Score m/z  
 sys\_05\_2 34708 FTMS; HCD 247.91 731.78

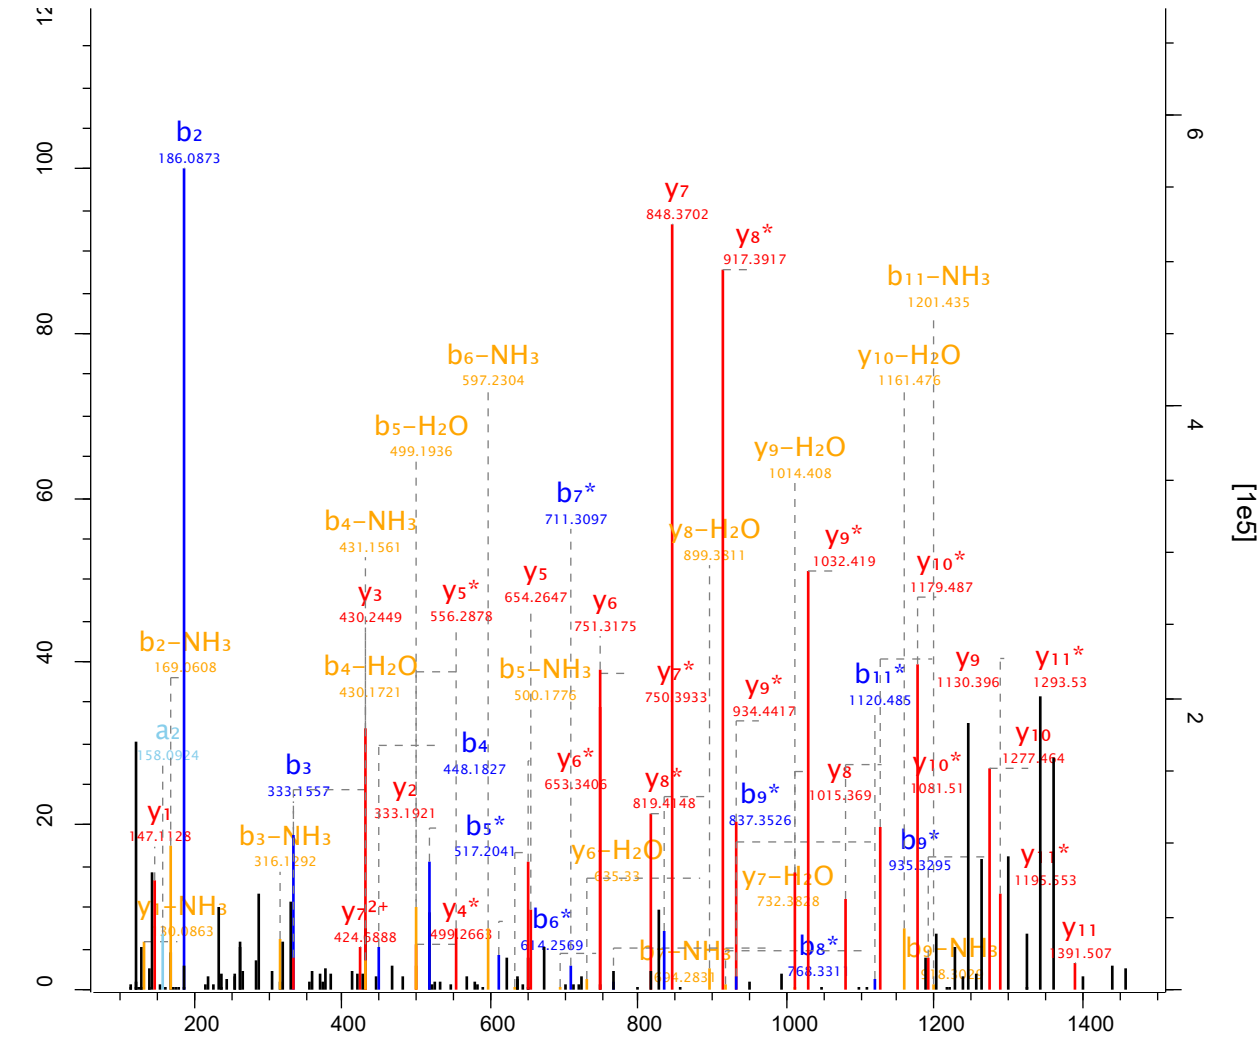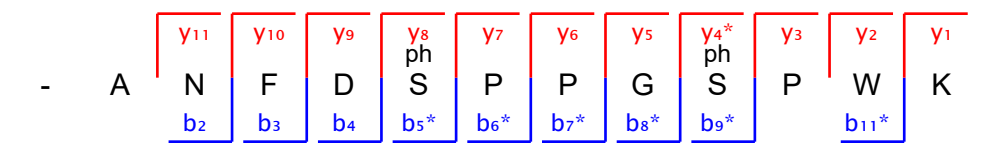



Raw file Scan Method Score m/z  
 sys\_05\_2 35017 FTMS; HCD 68.68 662.33

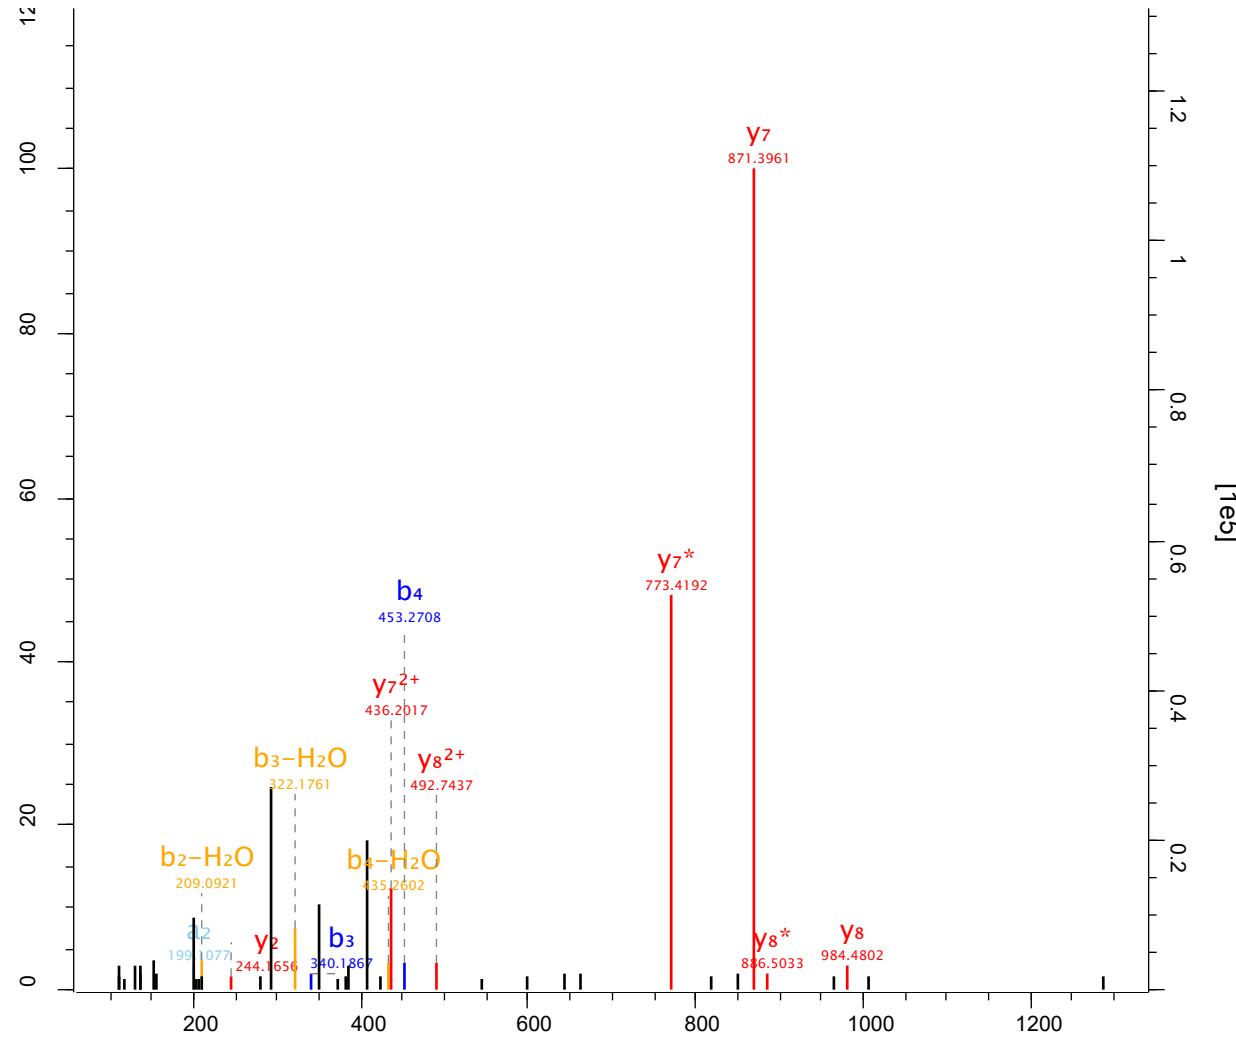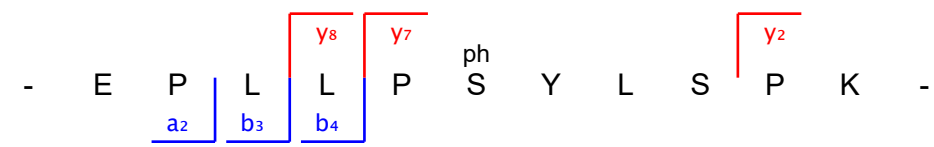

Raw file Scan Method Score m/z  
 sys\_05\_2 35388 FTMS; HCD 185.66 597.26

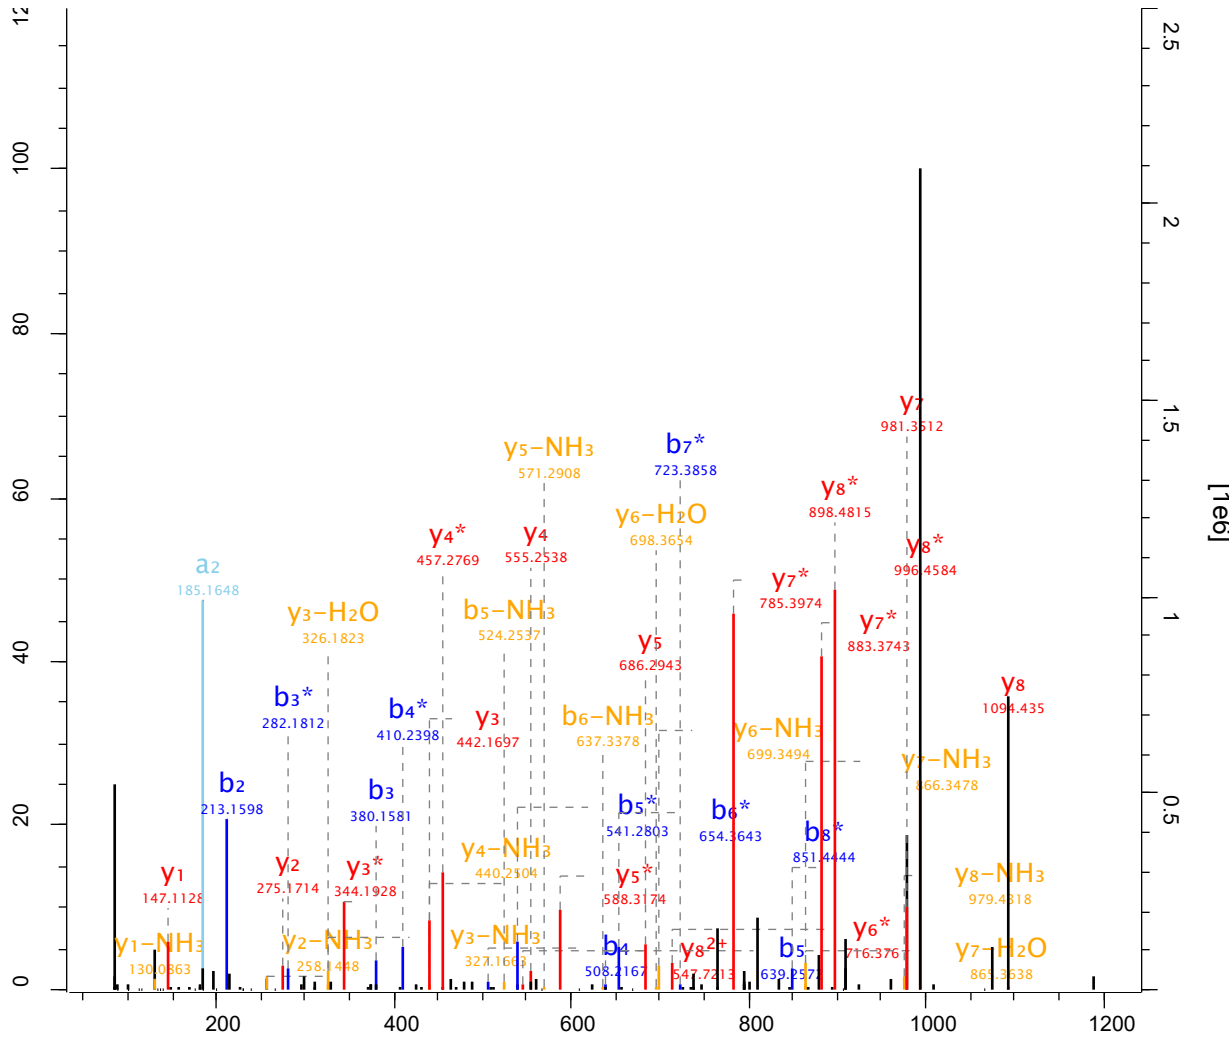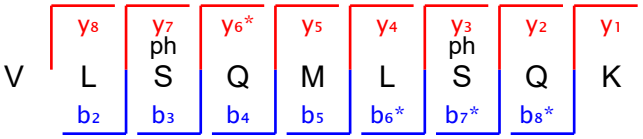

Raw file Scan Method Score m/z  
 sys\_05\_2 3551 FTMS; HCD 80.69 606.25

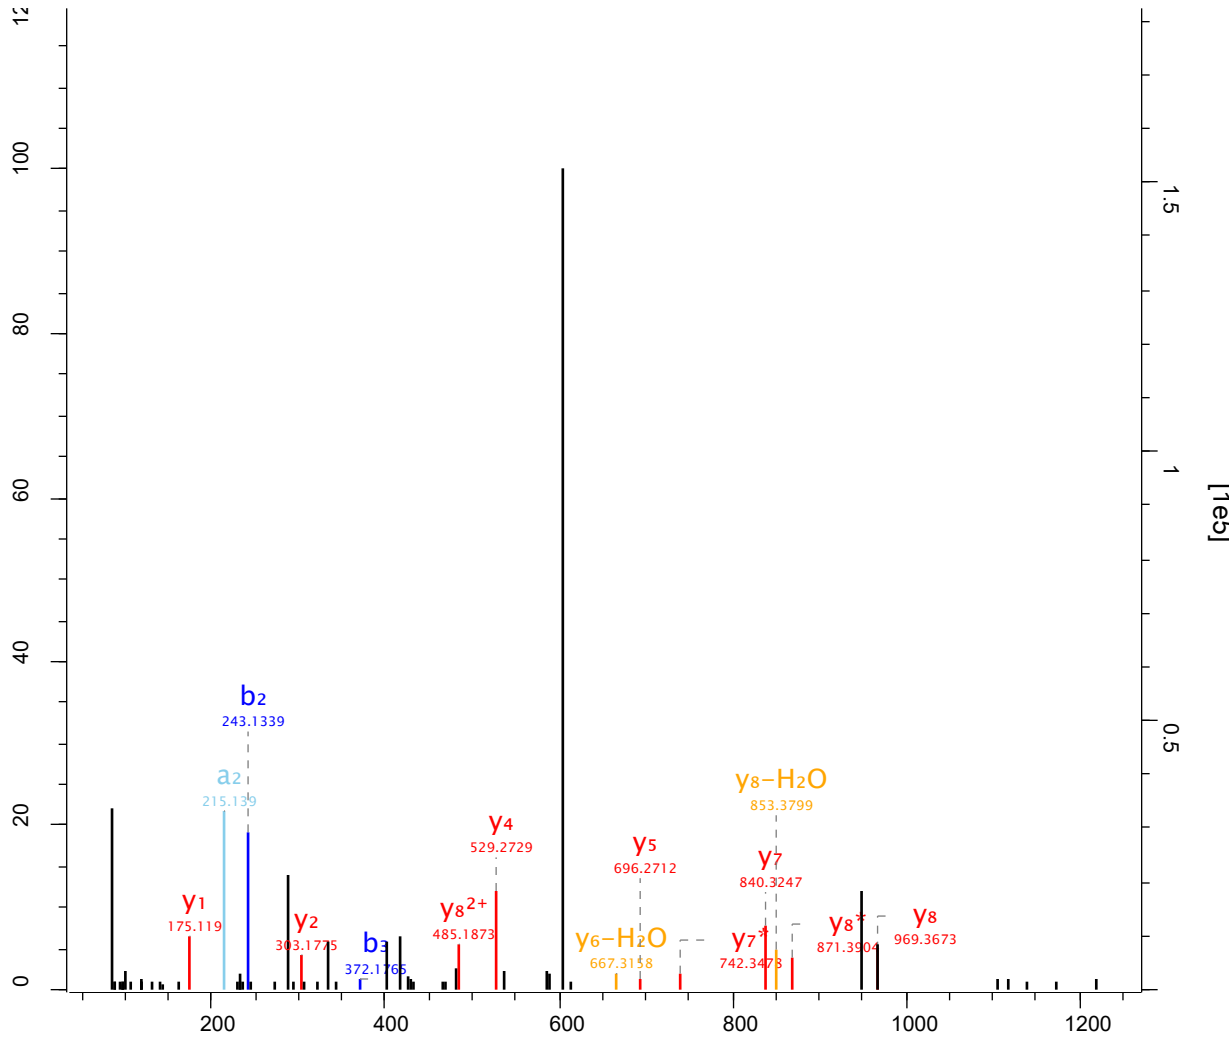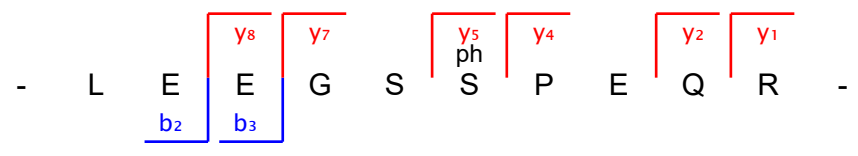

Raw file Scan Method Score m/z  
 sys\_05\_2 3575 FTMS; HCD 61.24 545.73

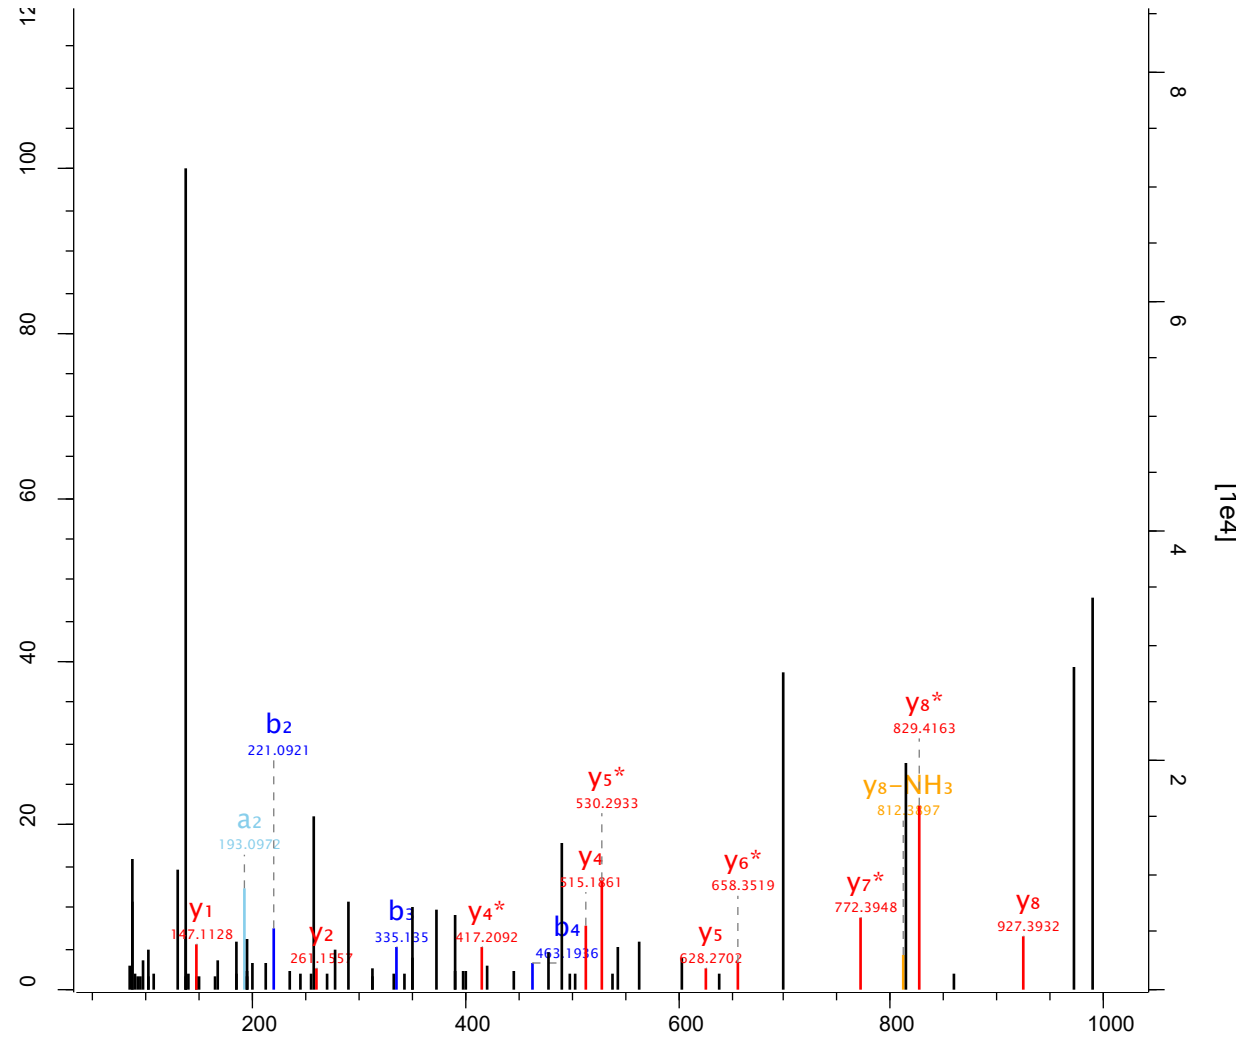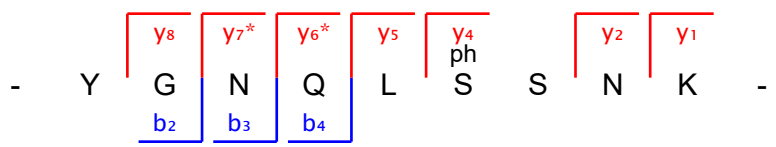

Raw file Scan Method Score m/z  
 sys\_05\_2 35983 FTMS; HCD 68.58 946.92

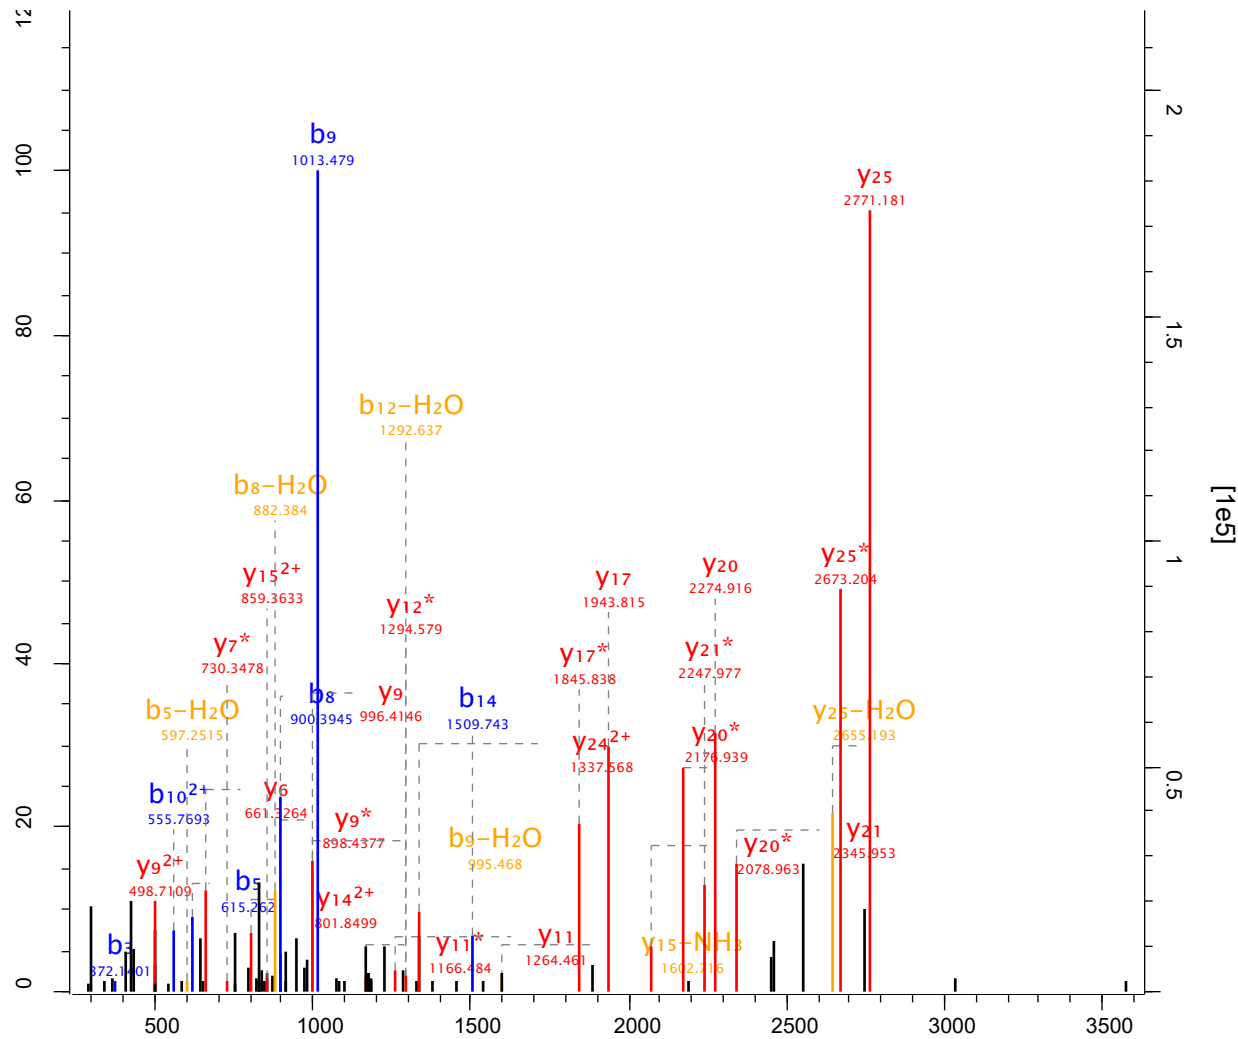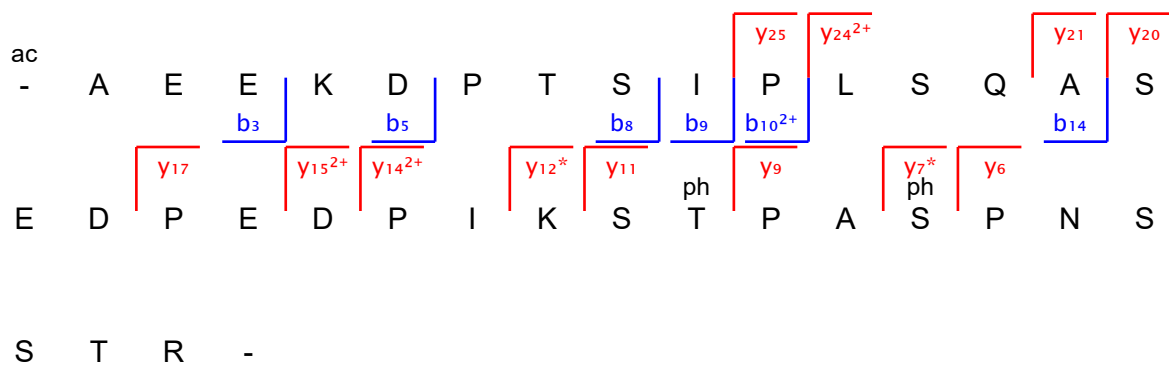

Raw file Scan Method Score m/z  
 sys\_05\_2 36133 FTMS; HCD 170.09 799.37

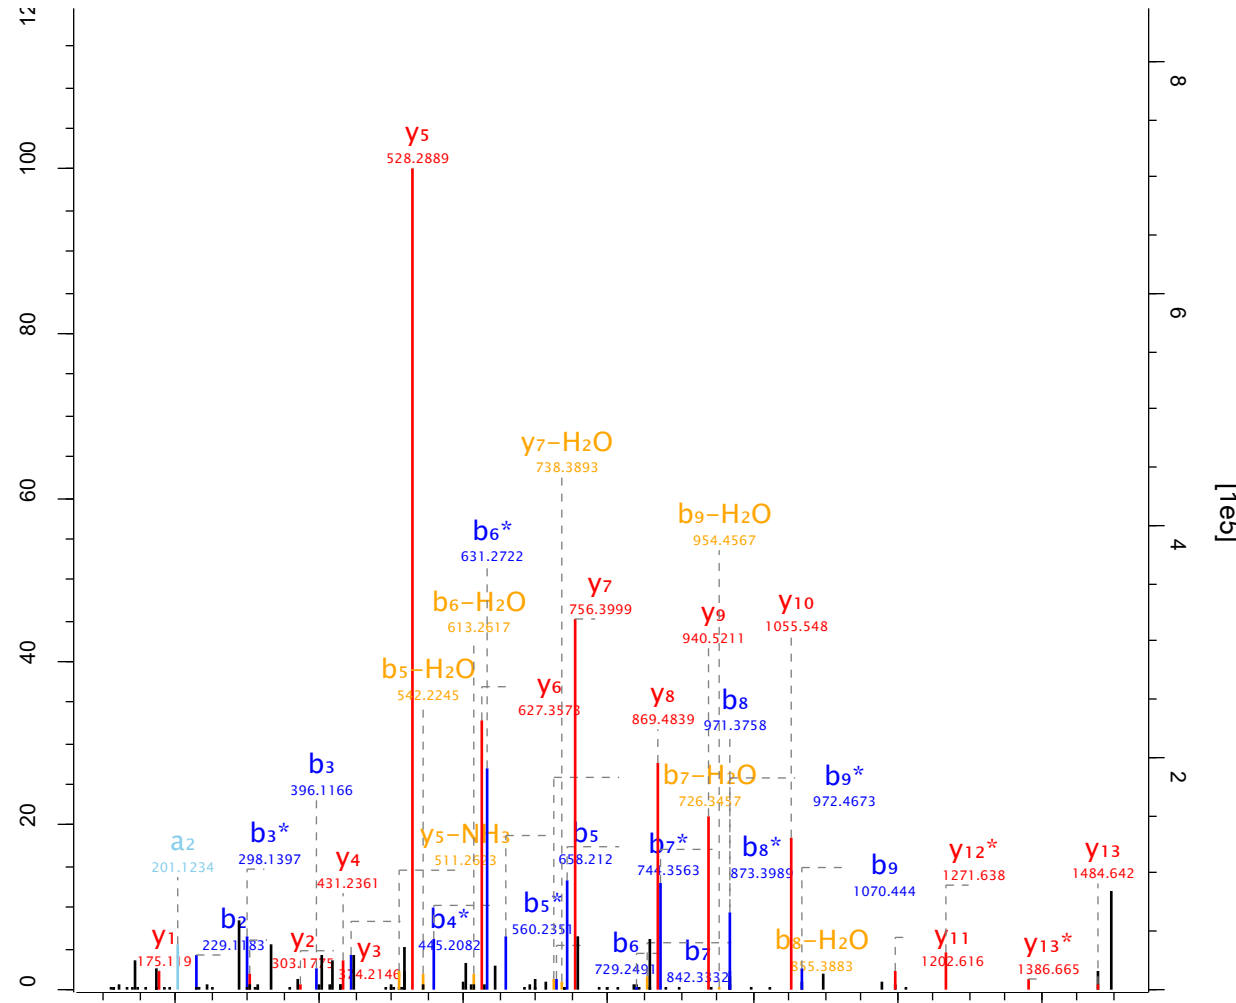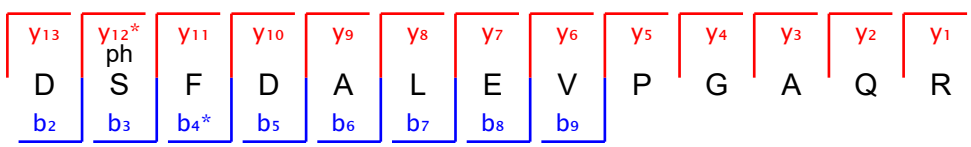

Raw file Scan Method Score m/z  
 sys\_05\_2 3714 FTMS; HCD 83.88 507.22

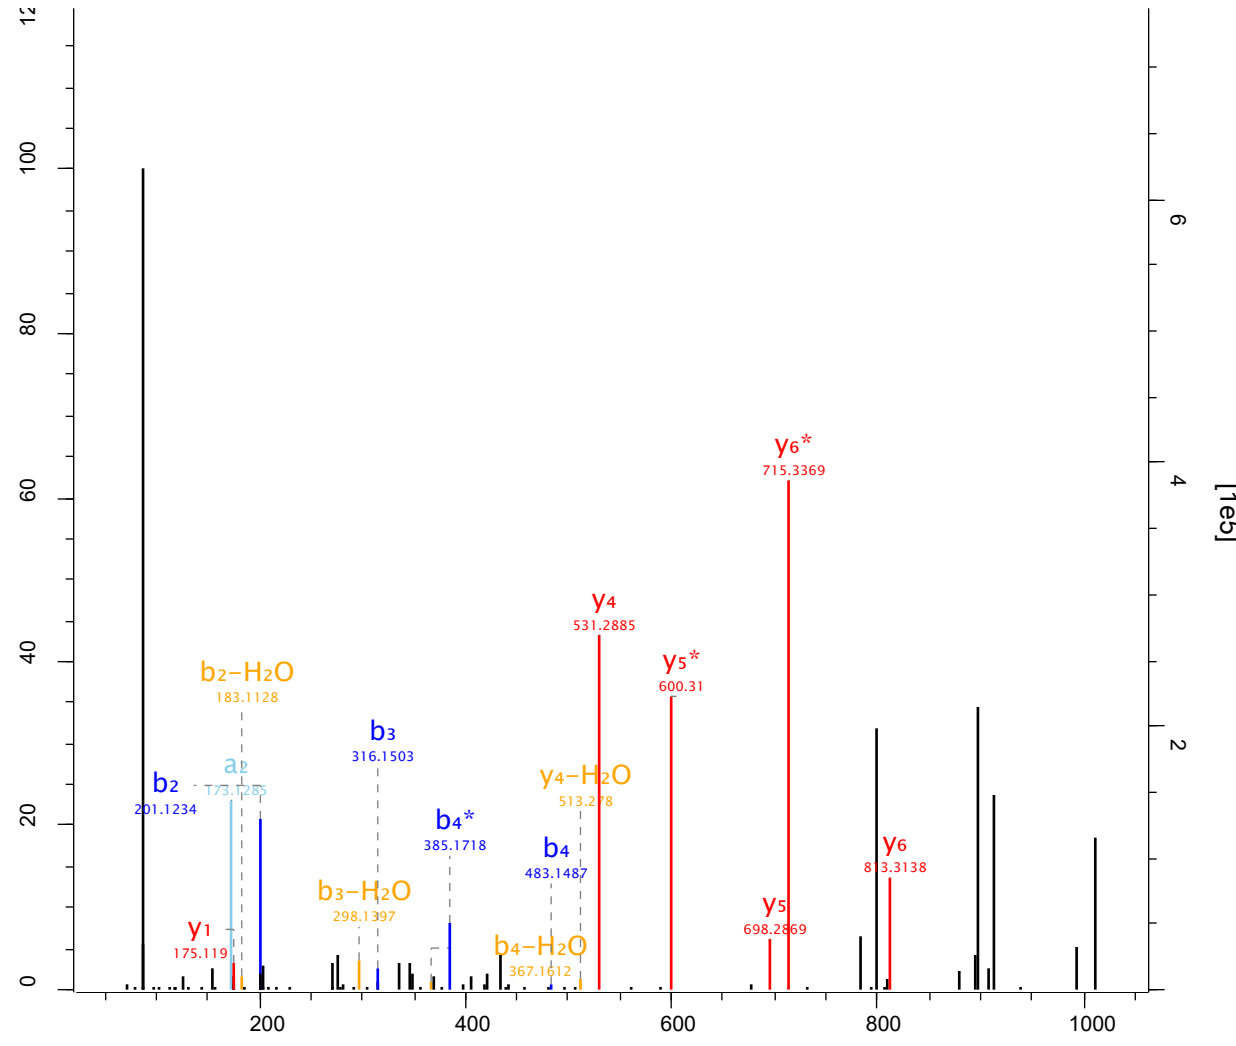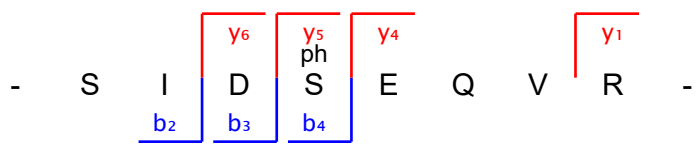

Raw file Scan Method Score m/z  
 sys\_05\_2 38471 FTMS; HCD 47.97 550.7

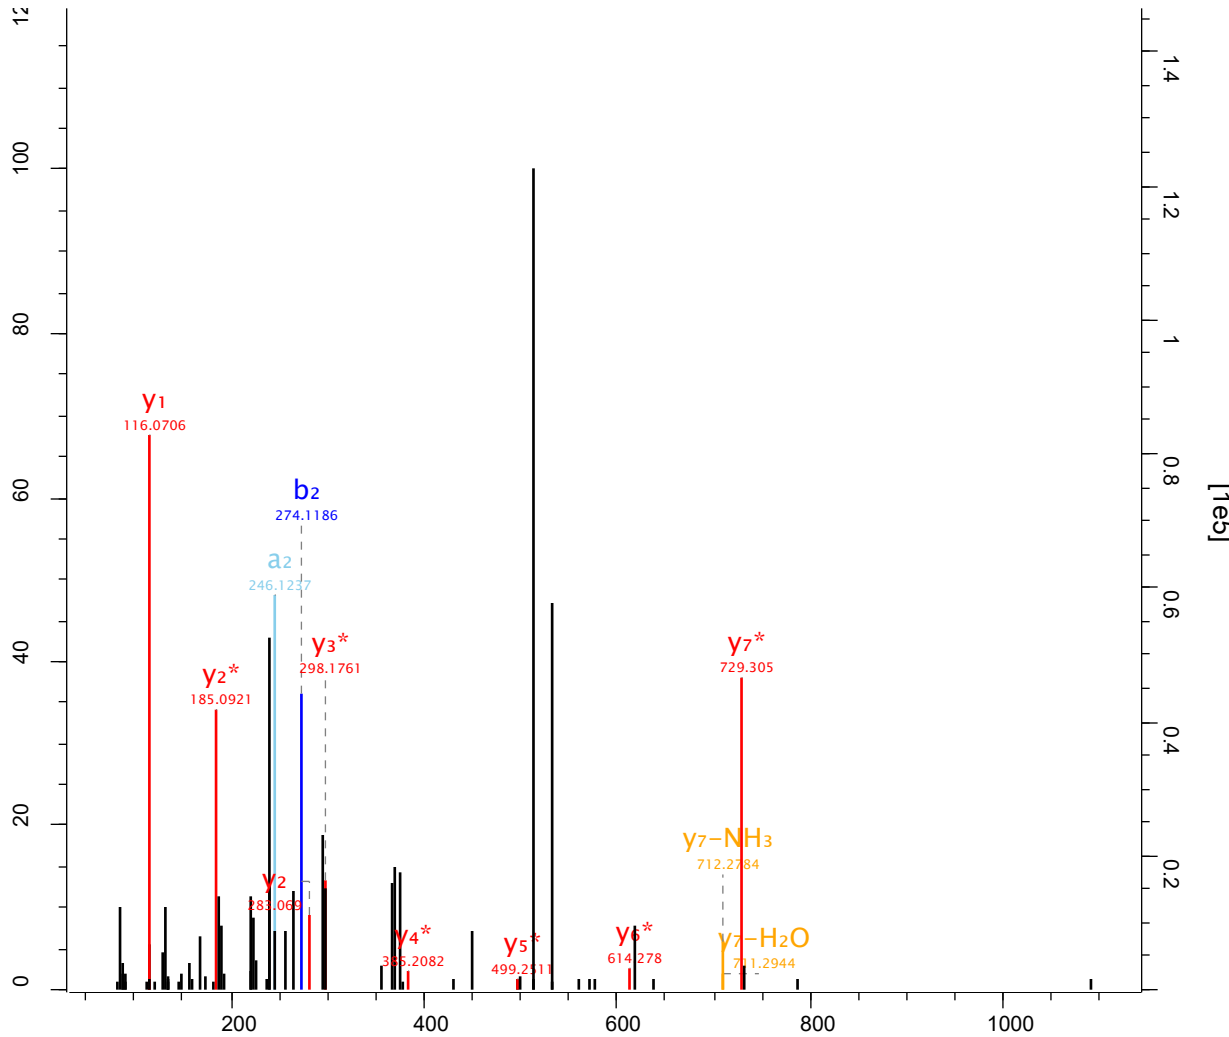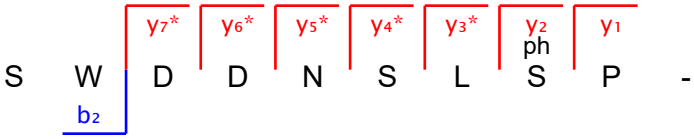



Raw file Scan Method Score m/z  
 sys\_05\_2 38501 FTMS; HCD 313.45 819.86

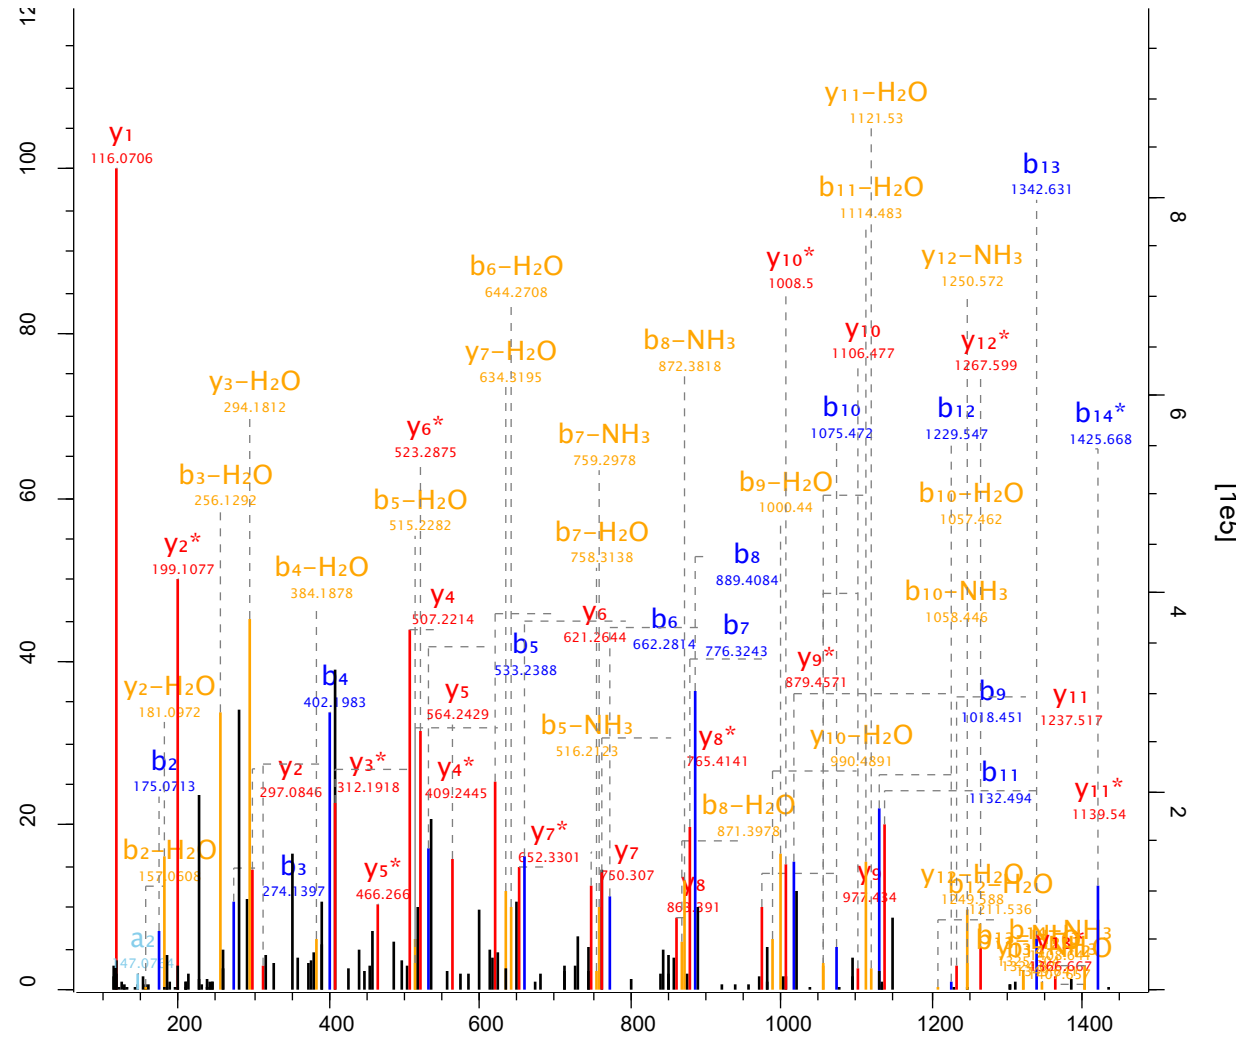

|   |   |                   |                   |                 |                 |                |                |                |                 |                 |                 |                  |                   |                |
|---|---|-------------------|-------------------|-----------------|-----------------|----------------|----------------|----------------|-----------------|-----------------|-----------------|------------------|-------------------|----------------|
| S | S | V                 | Q                 | M               | E               | N              | L              | E              | G               | G               | P               | L                | ph<br>T           | P              |
|   |   | b <sub>3</sub>    | b <sub>4</sub>    | b <sub>5</sub>  | b <sub>6</sub>  | b <sub>7</sub> | b <sub>8</sub> | b <sub>9</sub> | b <sub>10</sub> | b <sub>11</sub> | b <sub>12</sub> | b <sub>13</sub>  | b <sub>14</sub> * |                |
|   |   | y <sub>13</sub> * | y <sub>12</sub> * | y <sub>11</sub> | y <sub>10</sub> | y <sub>9</sub> | y <sub>8</sub> | y <sub>7</sub> | y <sub>6</sub>  | y <sub>5</sub>  | y <sub>4</sub>  | y <sub>3</sub> * | y <sub>2</sub>    | y <sub>1</sub> |

Raw file Scan Method Score m/z  
 sys\_05\_2 3904 FTMS; HCD 86.77 548.74

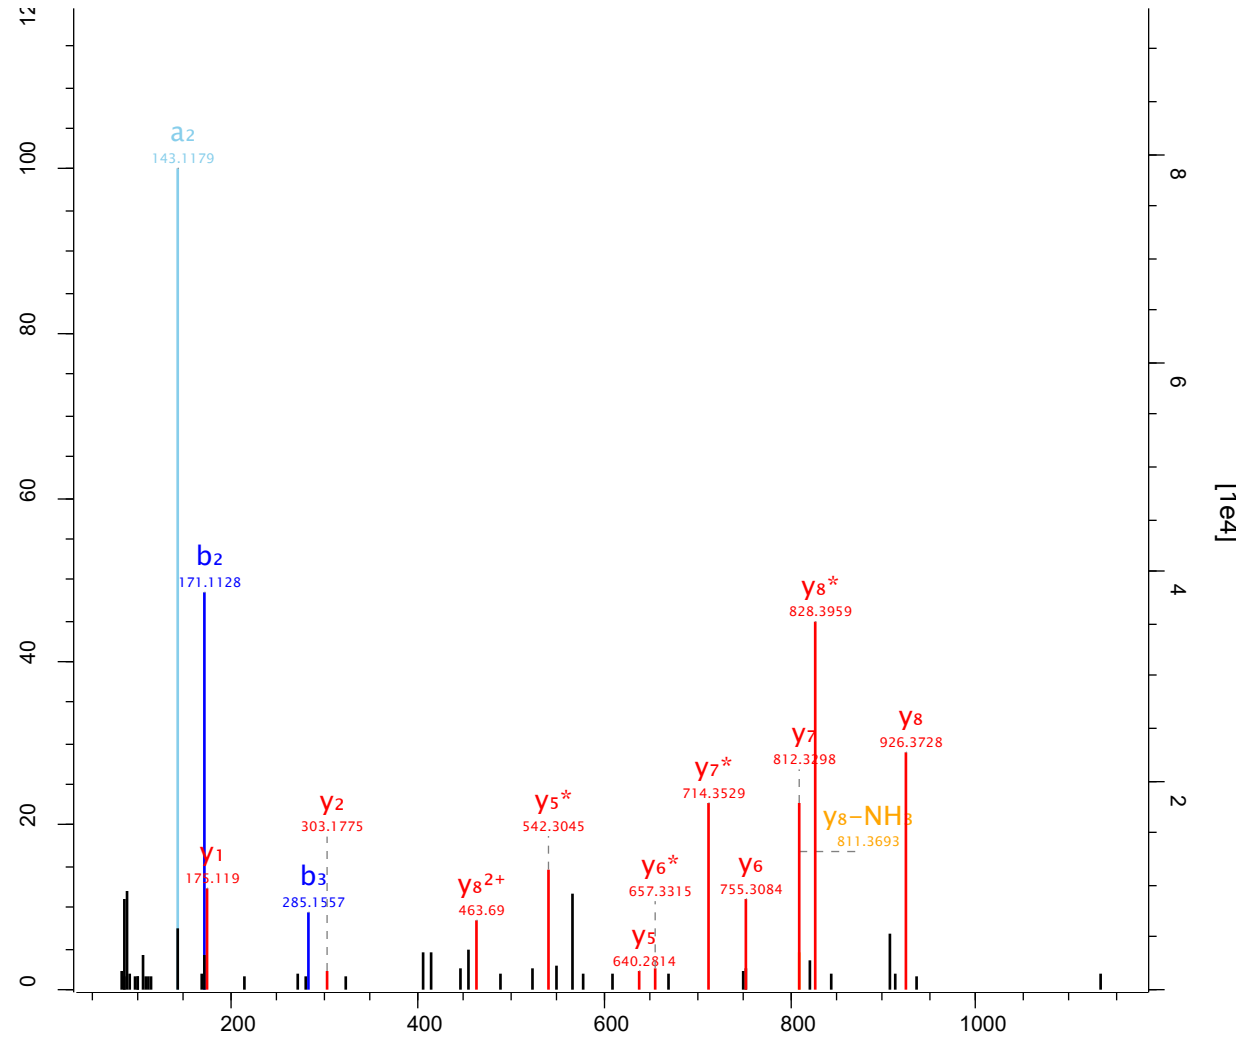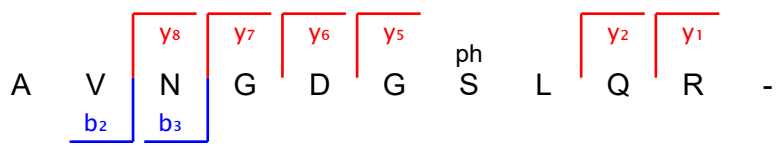

Raw file Scan Method Score m/z  
 sys\_05\_2 39396 FTMS; HCD 60.47 704.64

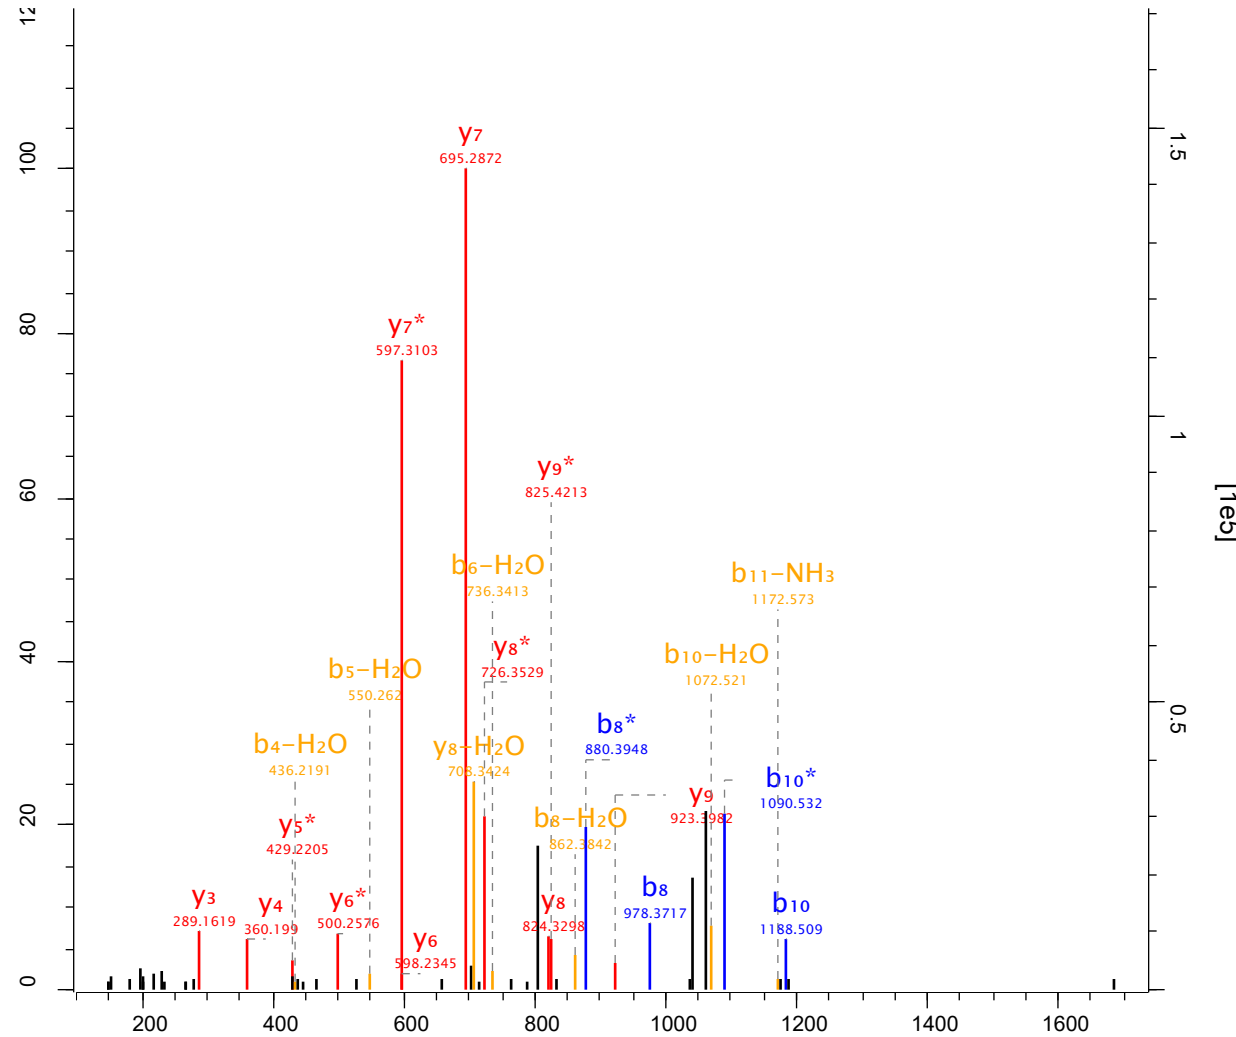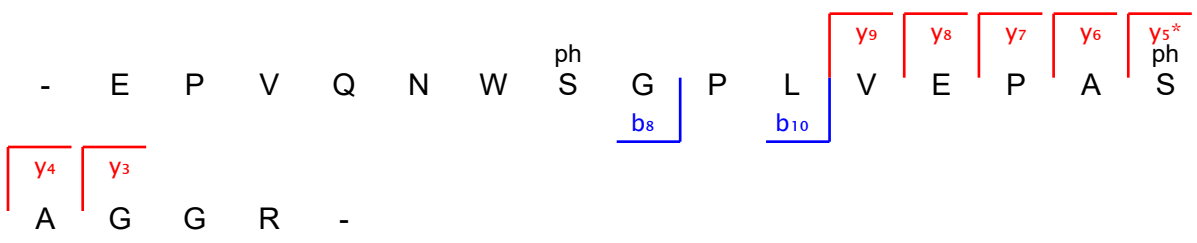

Raw file Scan Method Score m/z  
 sys\_05\_2 39835 FTMS; HCD 104.67 856.35

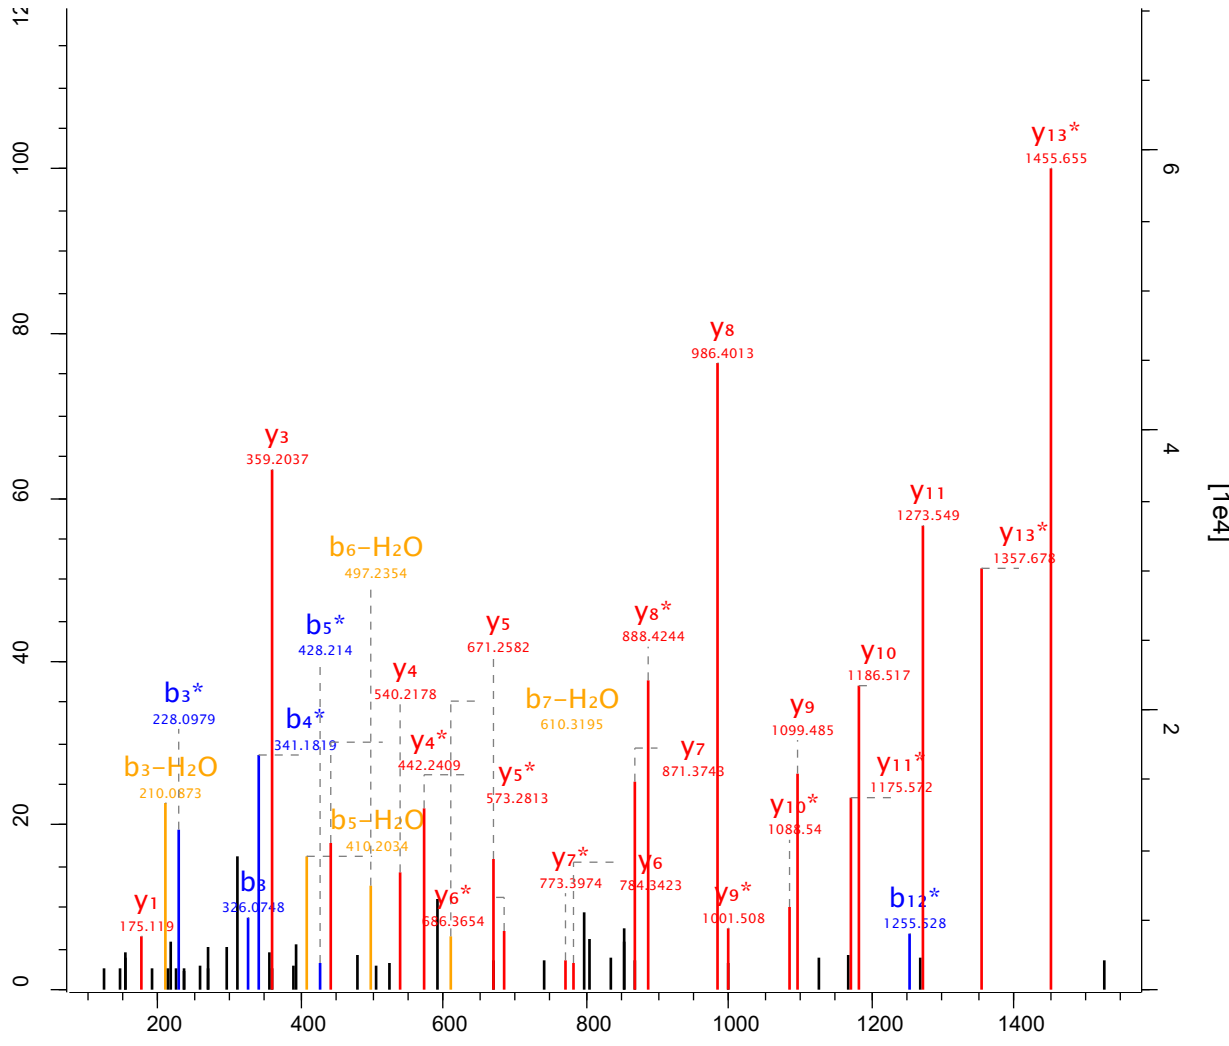

- A S y13\* ph y11 y10 y9 y8 y7 y6 y5 y4 ph y3 y1  
 - S L b3 b4\* b5\* b12\* P S R

Raw file Scan Method Score m/z  
 sys\_05\_2 40238 FTMS; HCD 110.97 732.32

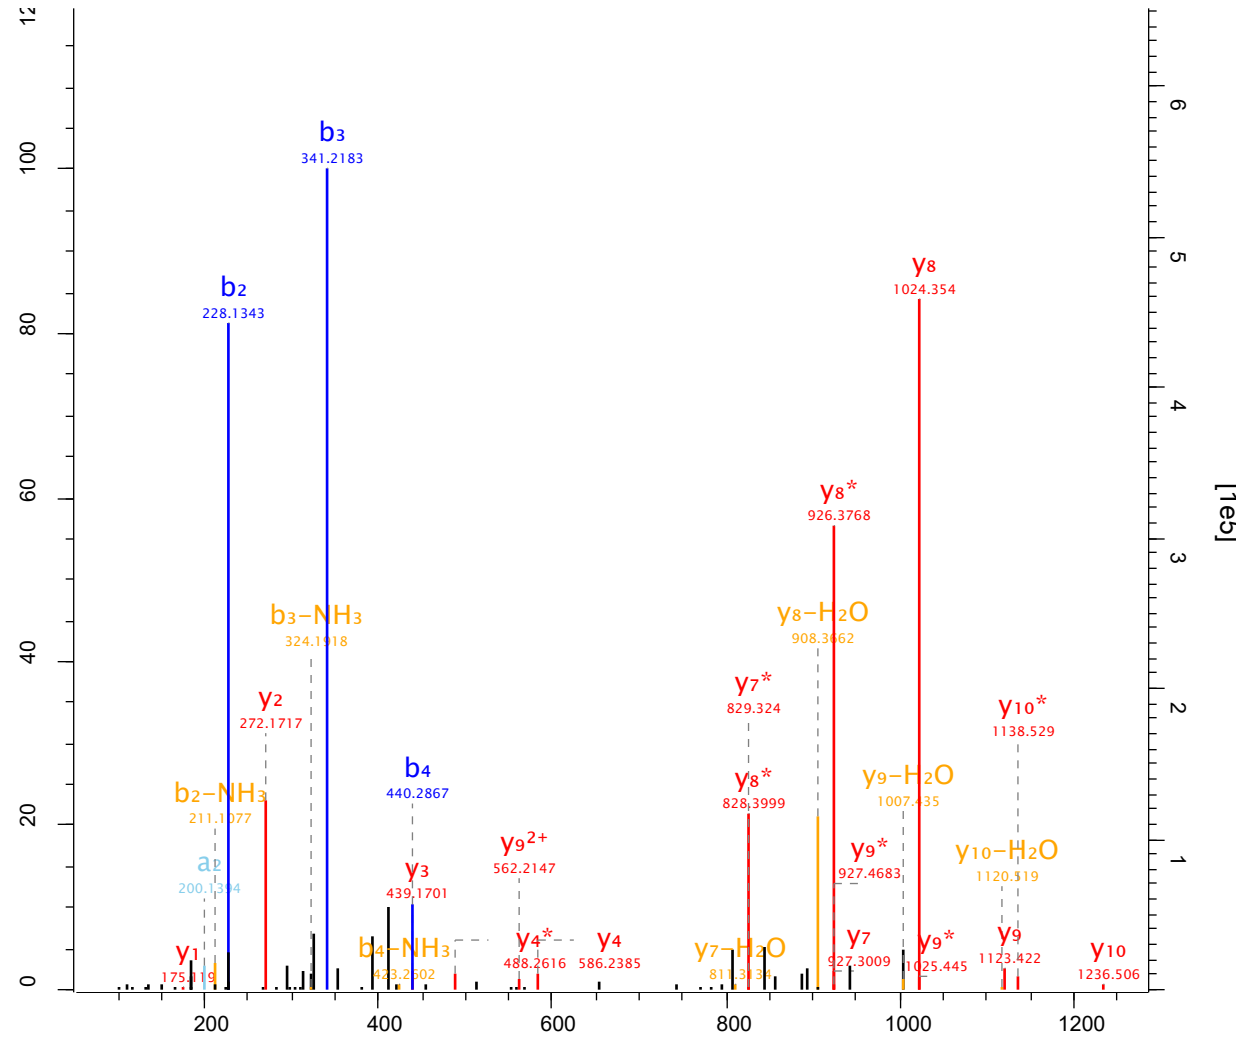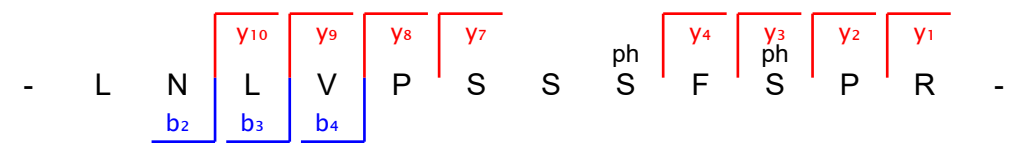

Raw file Scan Method Score m/z  
 sys\_05\_2 4074 FTMS; HCD 79.66 513.26

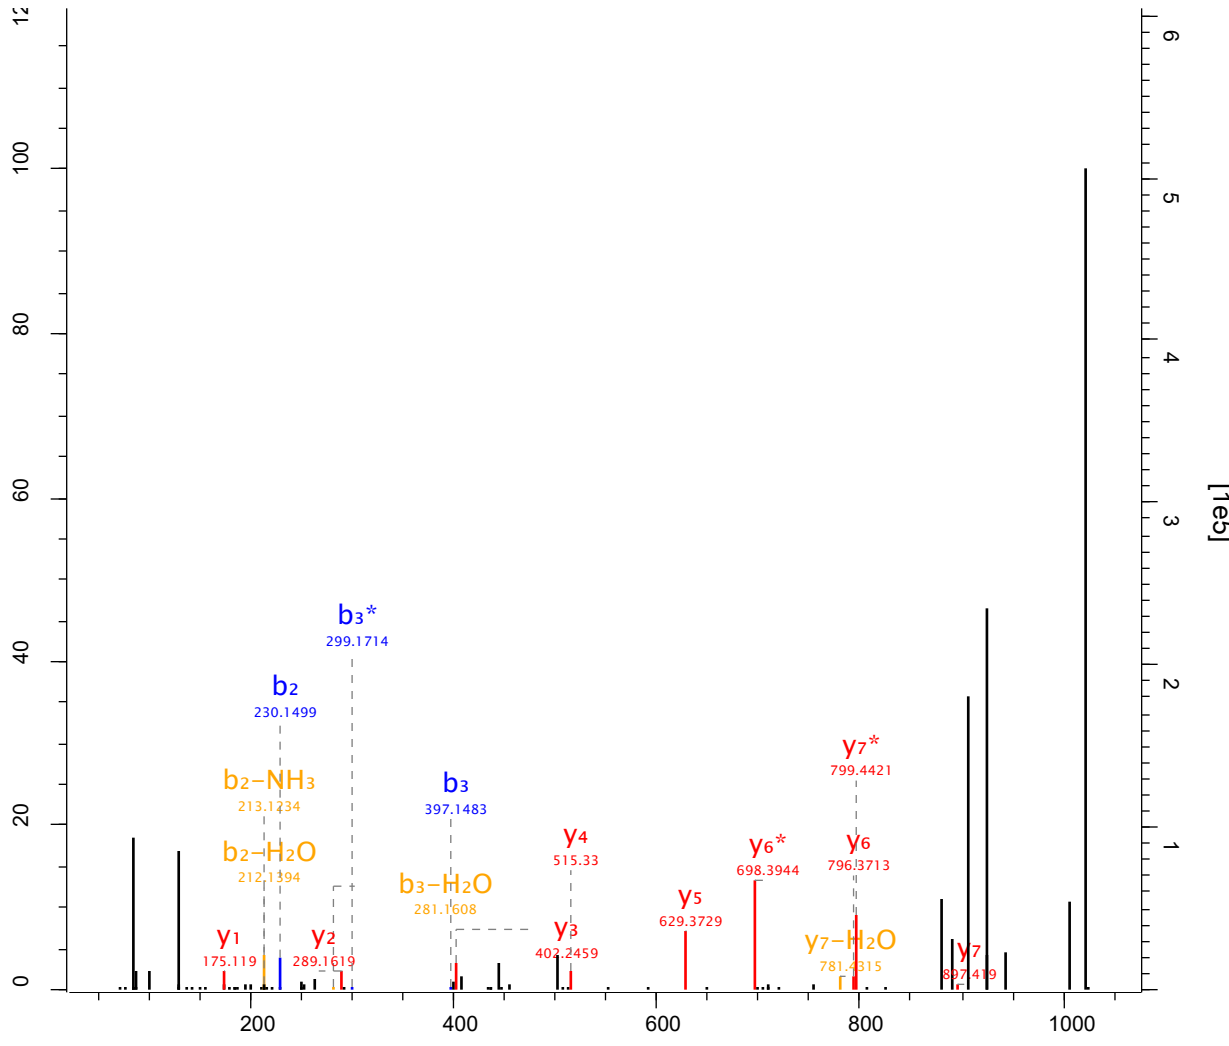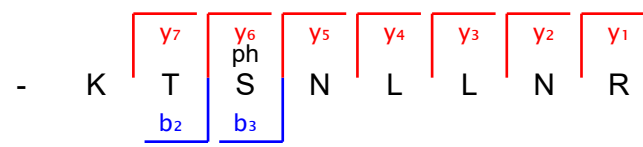

Raw file Scan Method Score m/z  
 sys\_05\_2 41352 FTMS; HCD 117.18 691.31

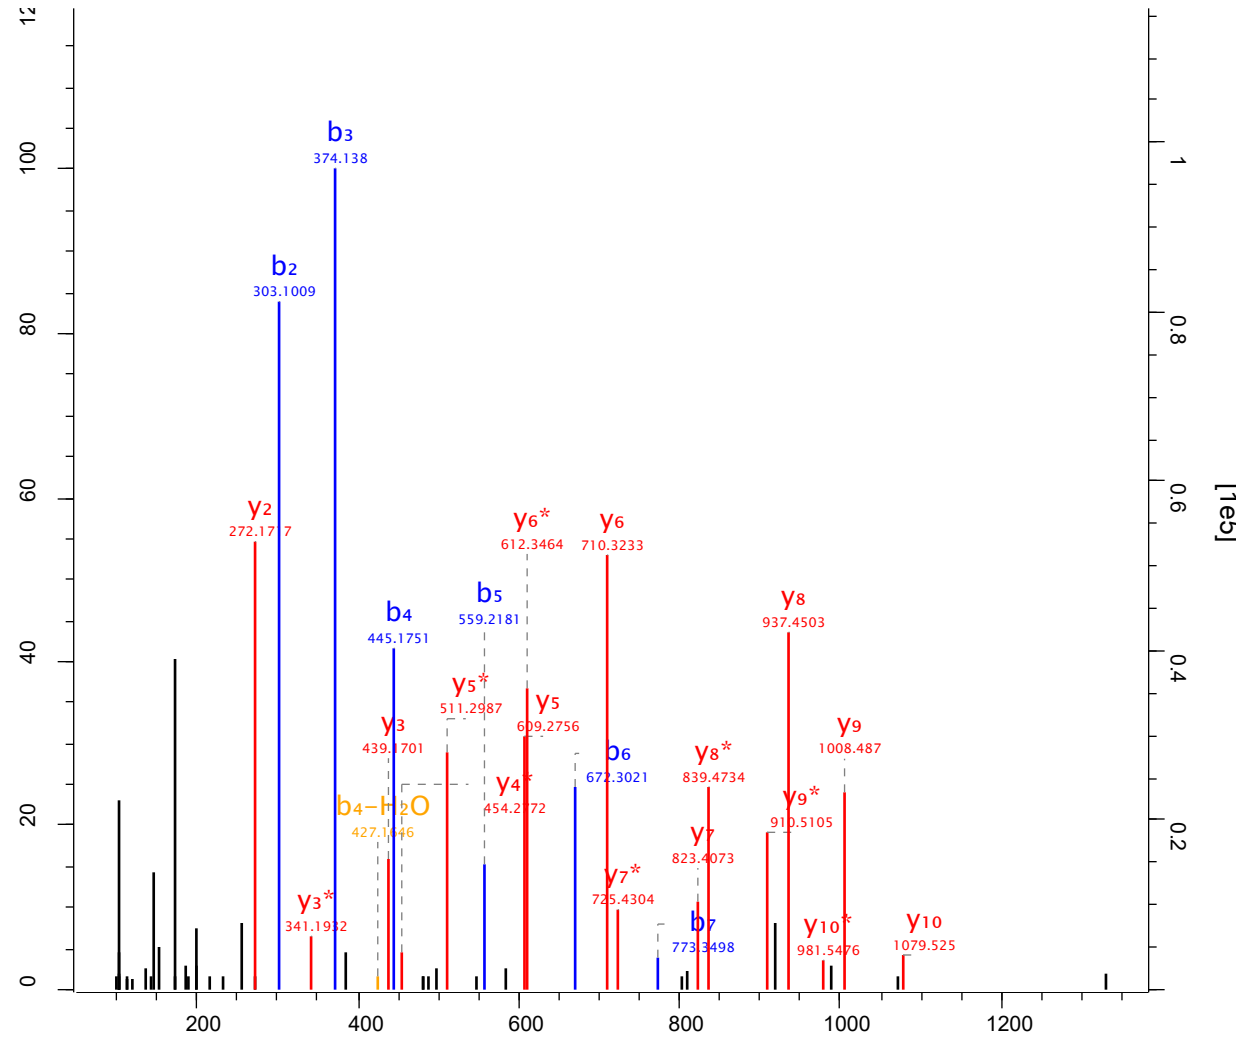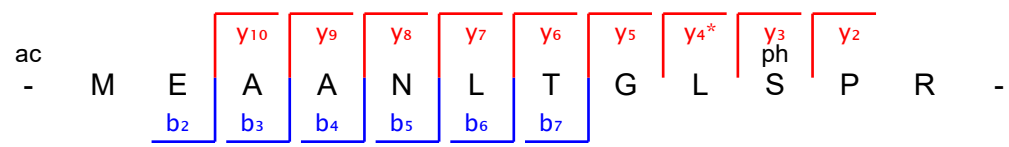

Raw file Scan Method Score m/z  
 sys\_05\_2 41402 FTMS; HCD 155.1 809.88

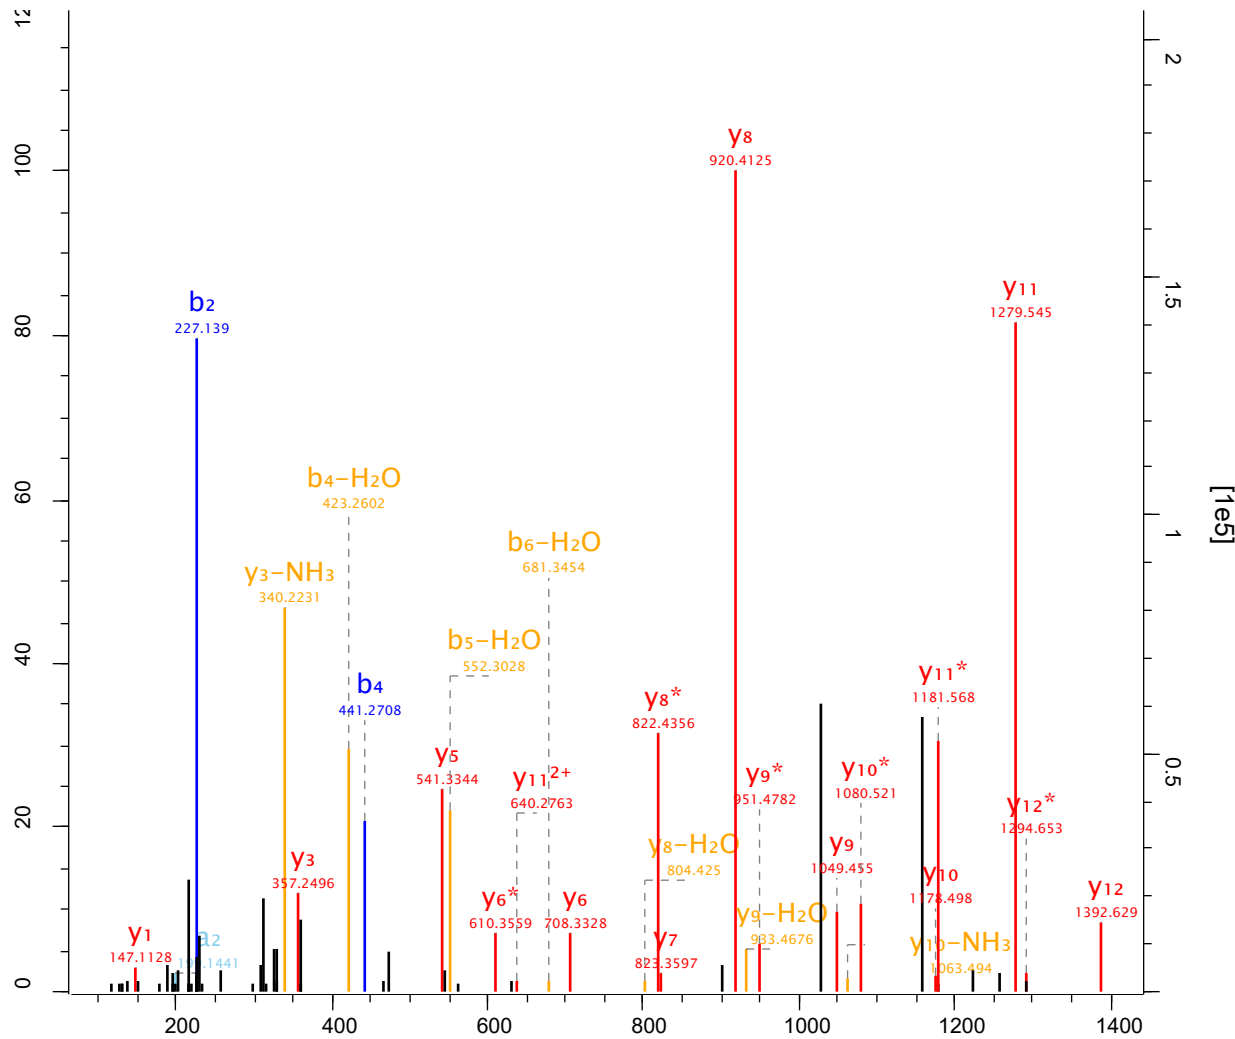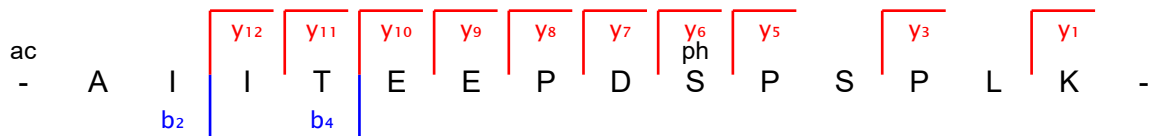



Raw file Scan Method Score m/z  
 sys\_05\_2 42234 FTMS; HCD 108.75 790.86

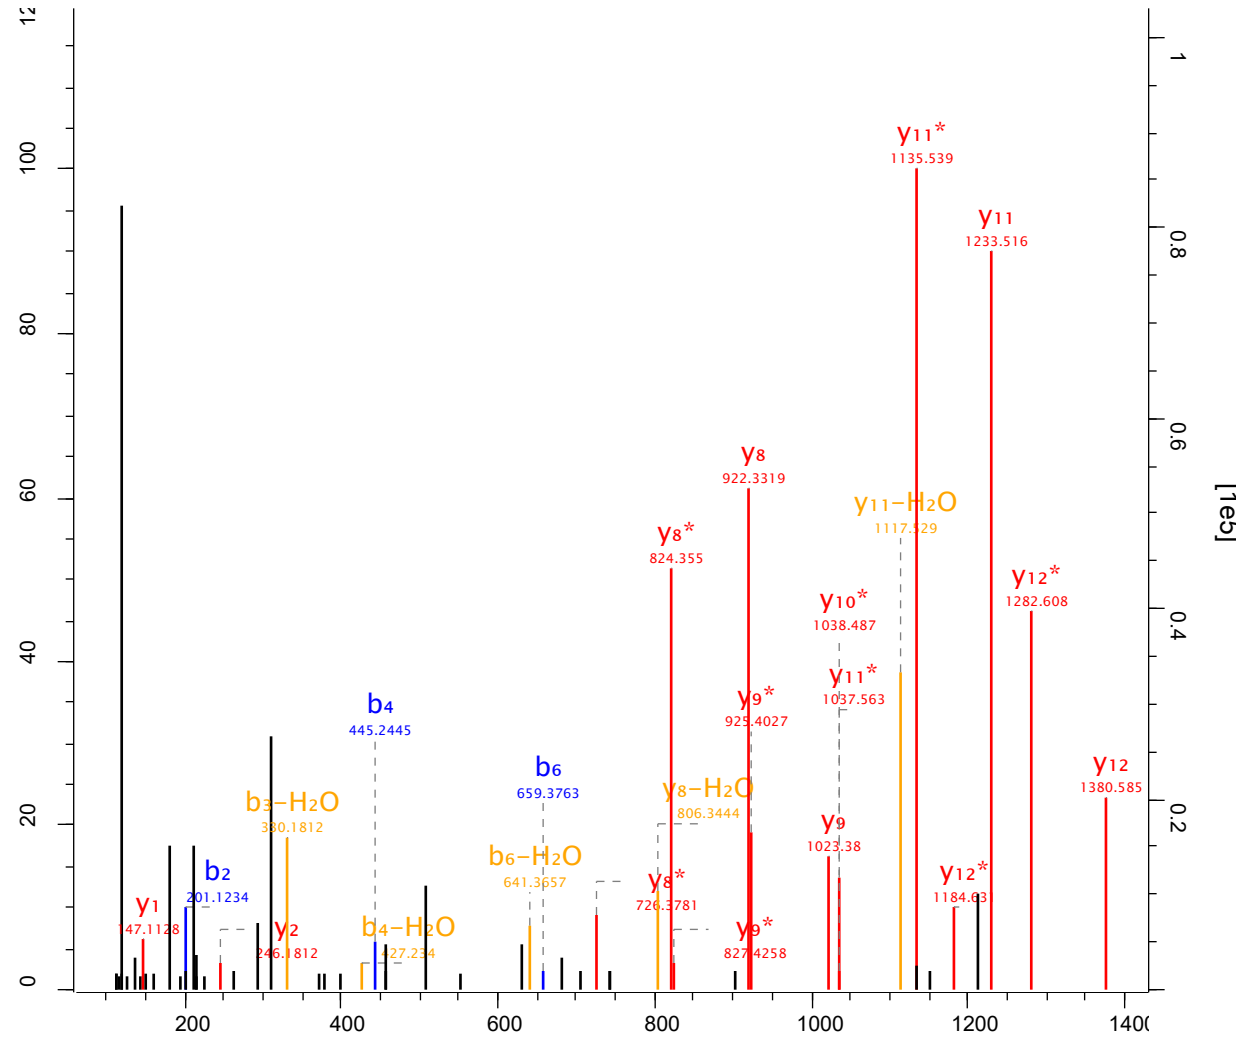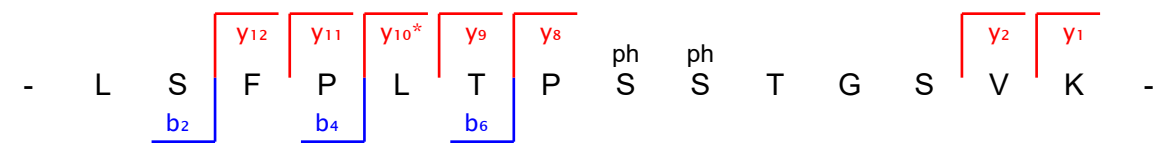



Raw file Scan Method Score m/z  
 sys\_05\_2 42764 FTMS; HCD 264.01 835.87

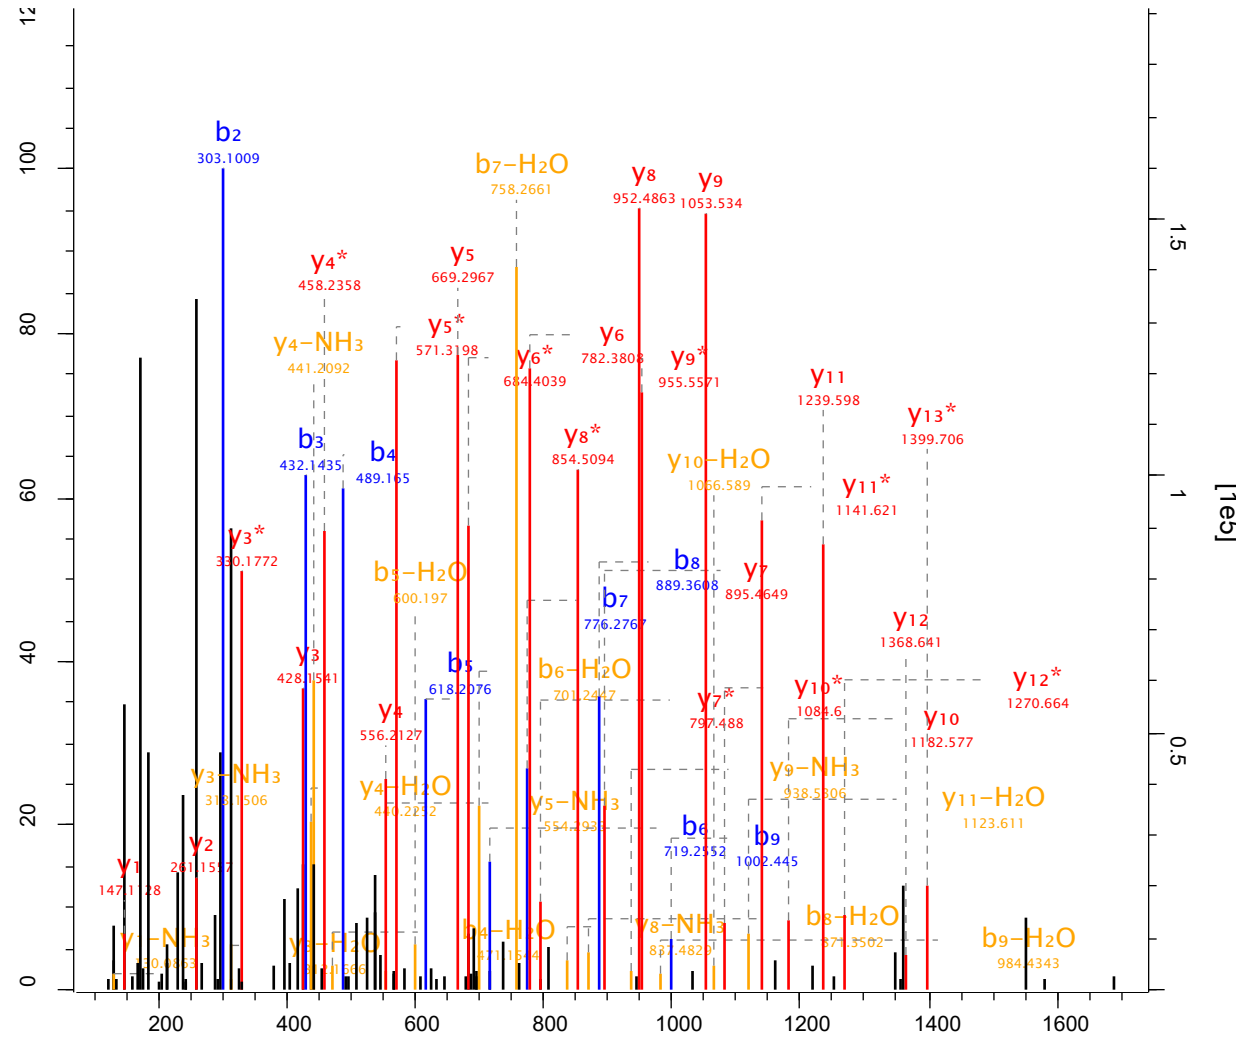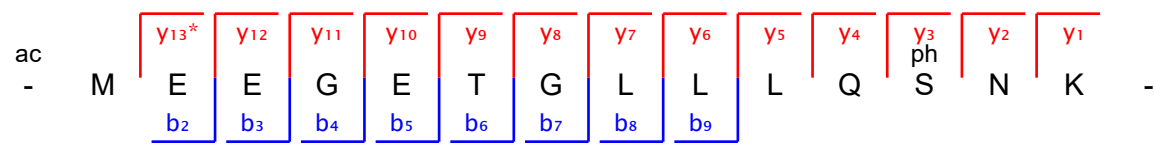

Raw file Scan Method Score m/z  
 sys\_05\_2 4327 FTMS; HCD 167.89 585.26

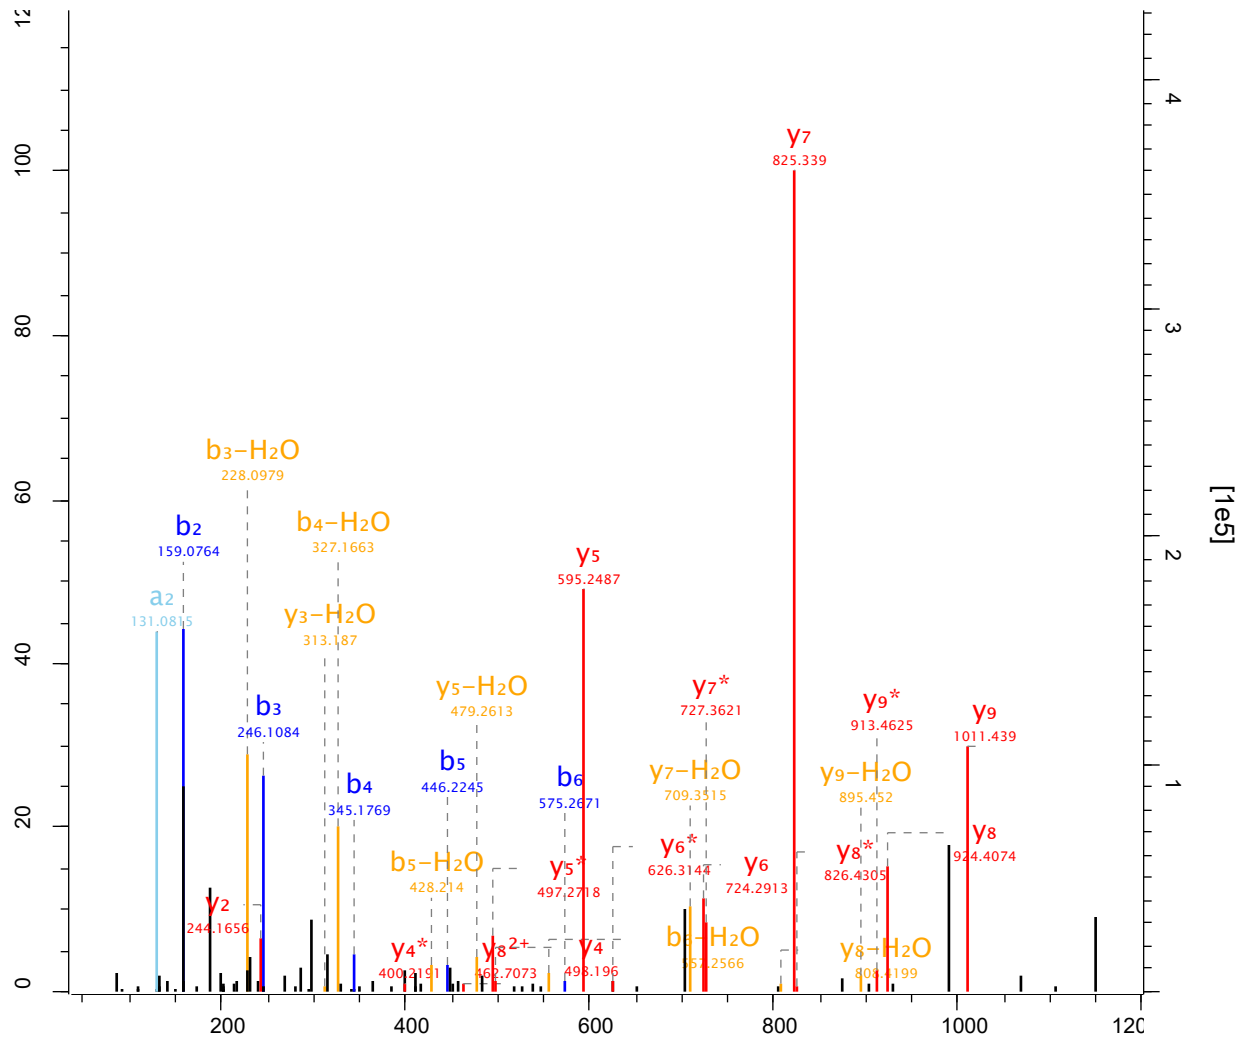

- S A S V T E P S S P K -

b<sub>2</sub>
b<sub>3</sub>
b<sub>4</sub>
b<sub>5</sub>
b<sub>6</sub>
y<sub>9</sub>
y<sub>8</sub>
y<sub>7</sub>
y<sub>6</sub>
y<sub>5</sub>
y<sub>4</sub>ph
y<sub>2</sub>

Raw file Scan Method Score m/z  
 sys\_05\_2 43787 FTMS; HCD 48.9 722.31

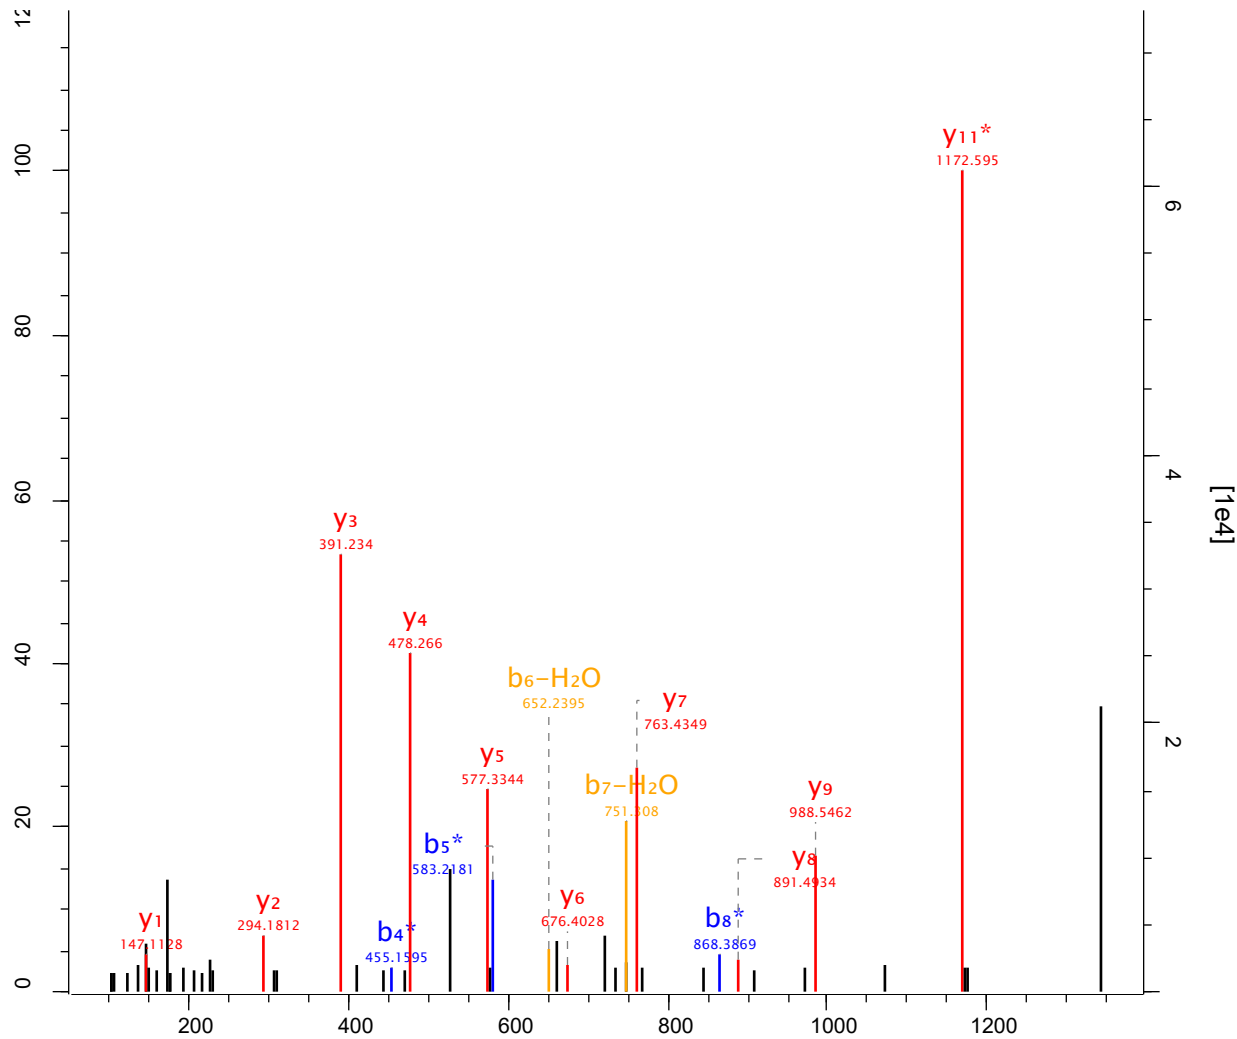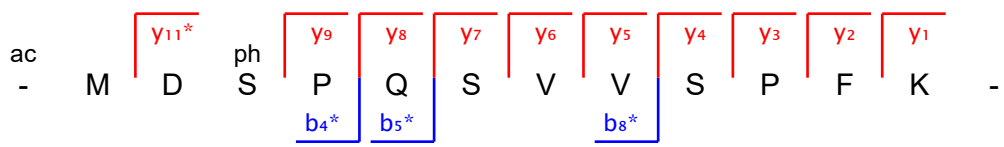

Raw file Scan Method Score m/z  
 sys\_05\_2 45695 FTMS; HCD 130.01 534.76

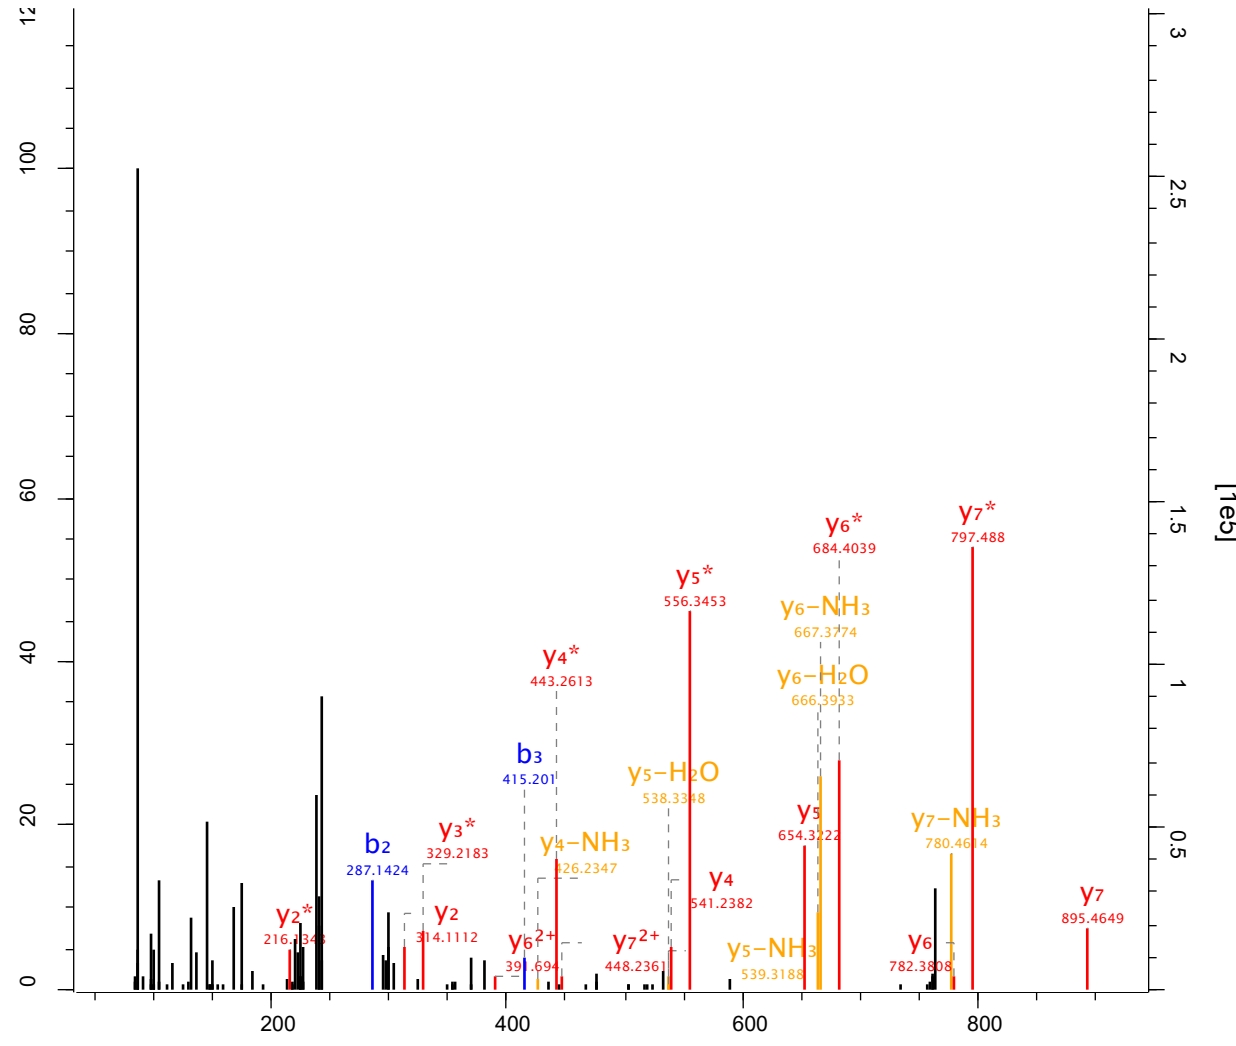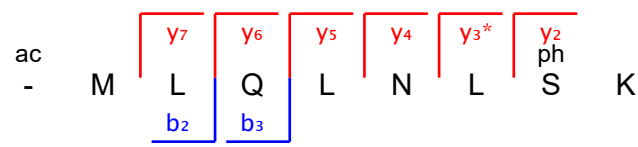

Raw file Scan Method Score m/z  
 sys\_05\_2 4607 FTMS; HCD 91.62 557.76

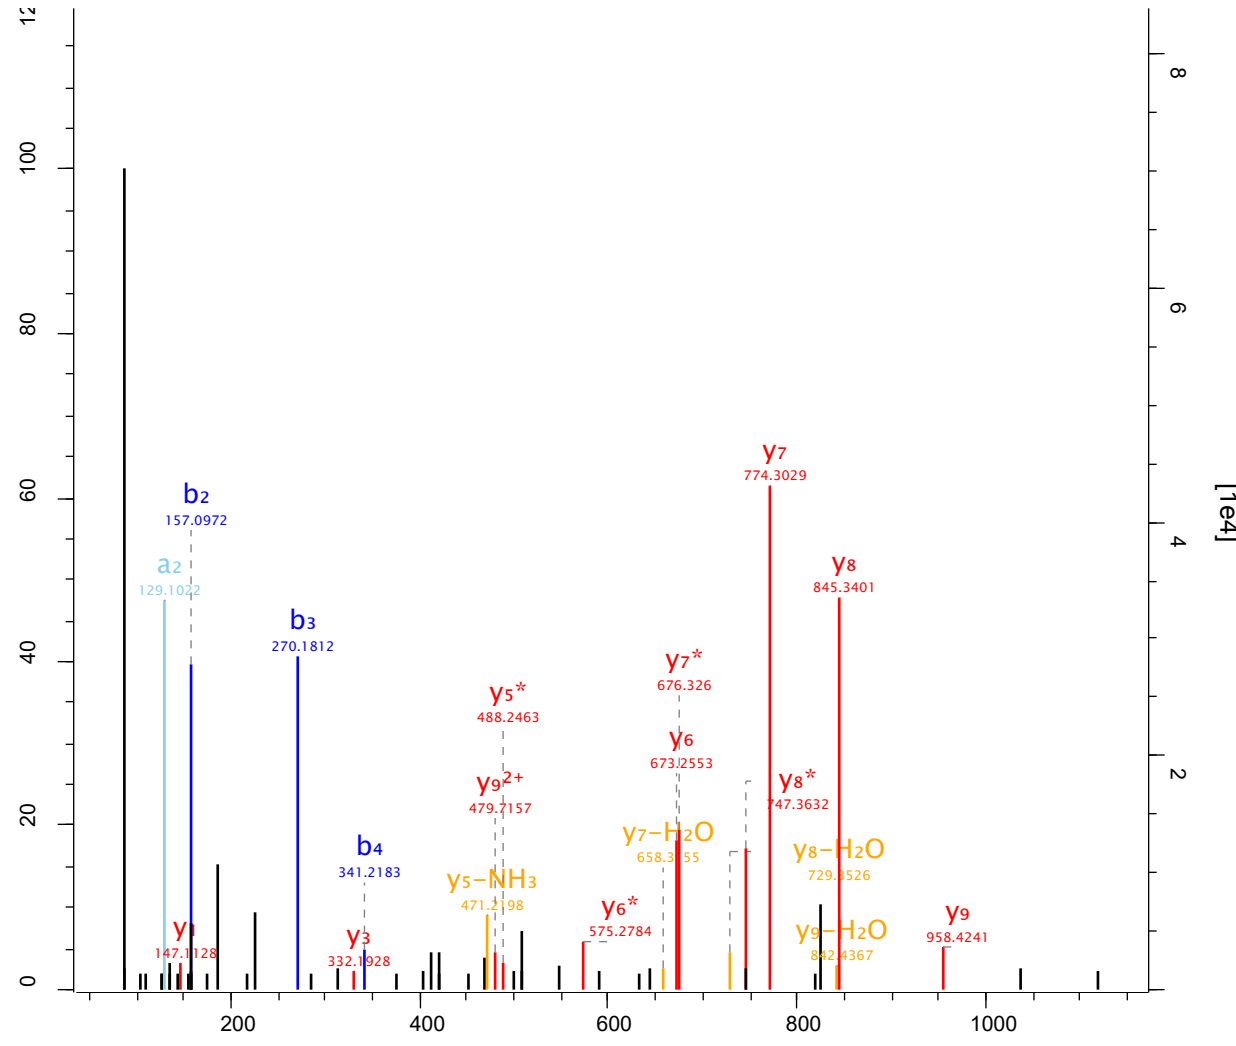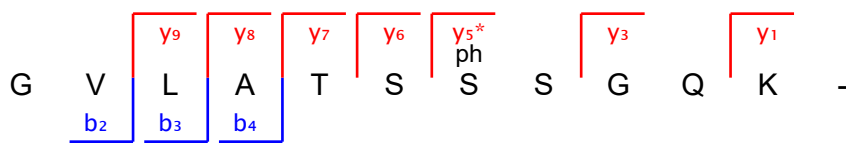

Raw file Scan Method Score m/z  
 sys\_05\_2 4614 FTMS; HCD 44.93 632.76

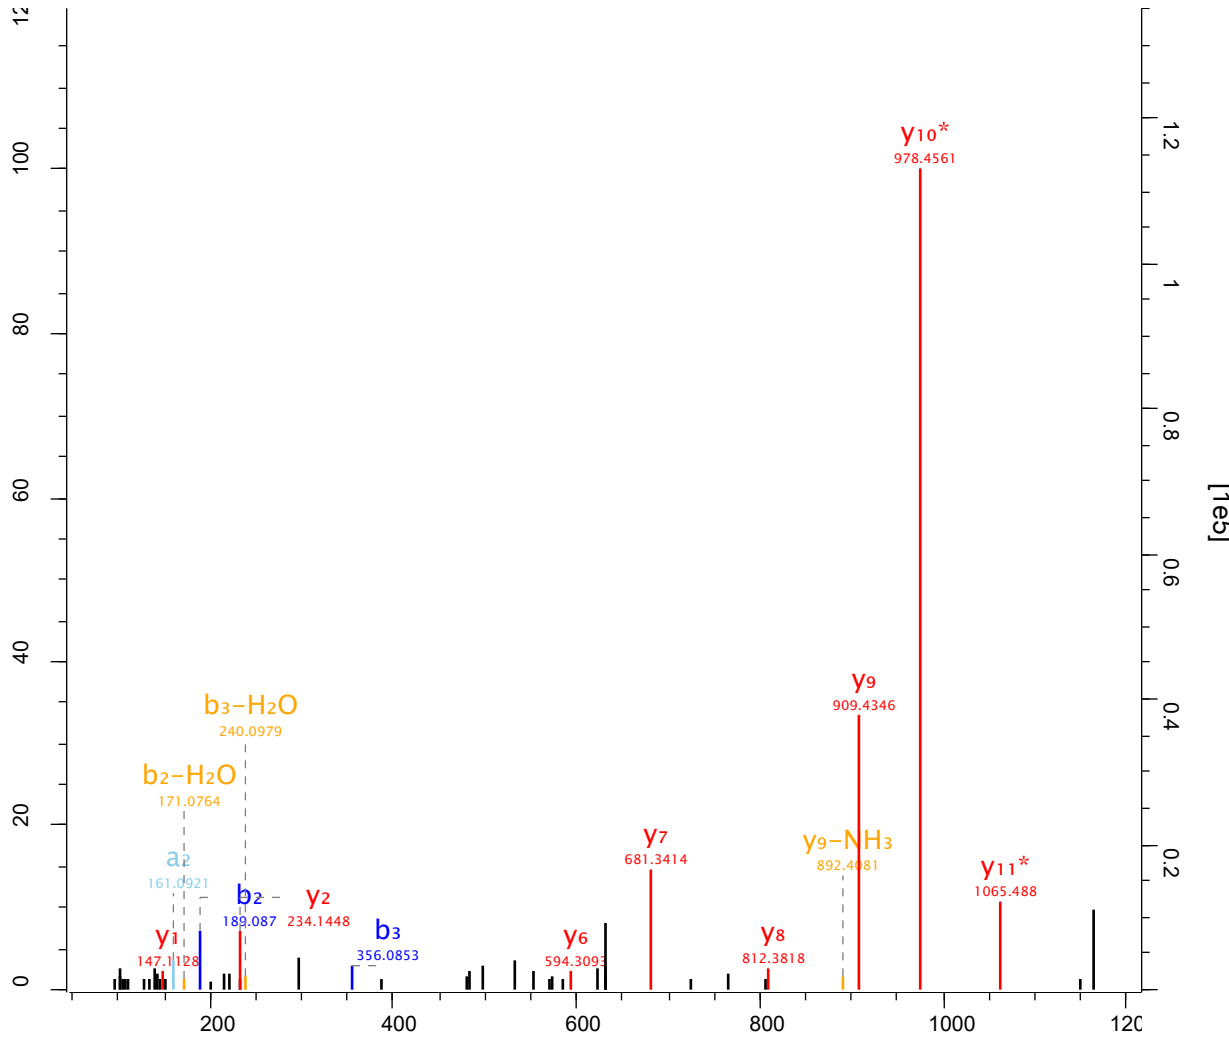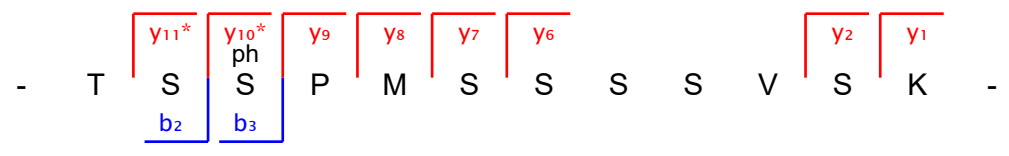



Raw file Scan Method Score m/z  
 sys\_05\_2 4635 FTMS; HCD 140.78 506.73

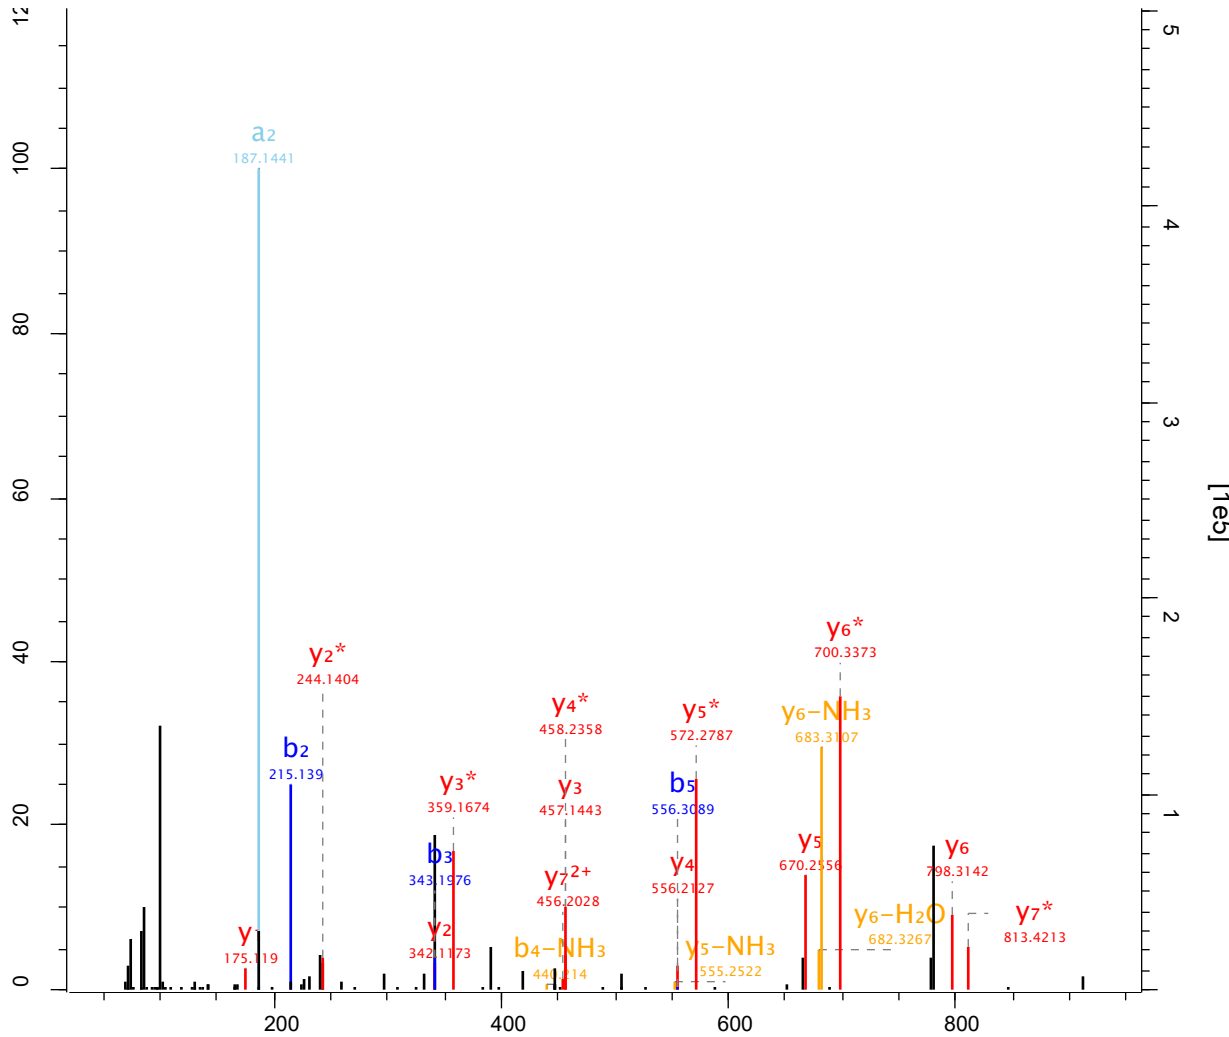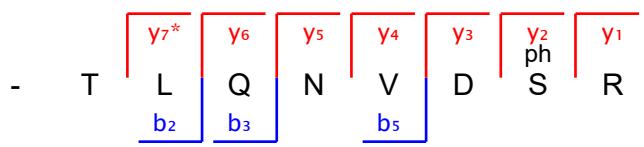

| Raw file | Scan | Method    | Score  | m/z    |
|----------|------|-----------|--------|--------|
| sys_05_2 | 4649 | FTMS; HCD | 108.47 | 485.72 |

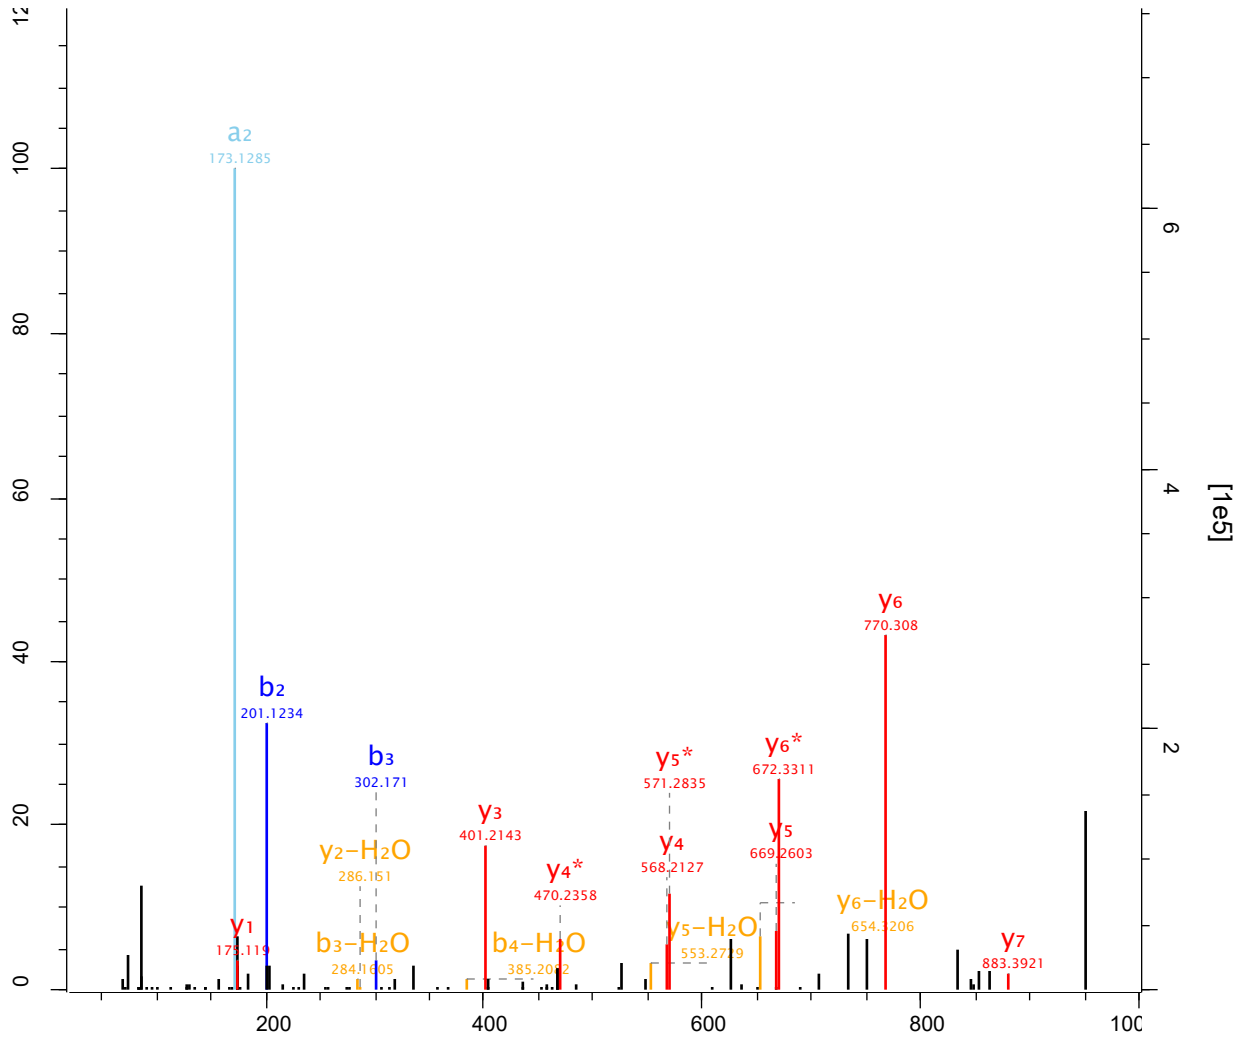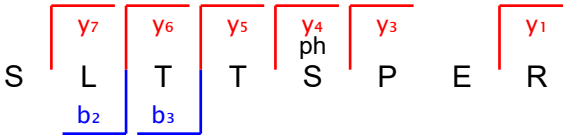

Raw file Scan Method Score m/z  
 sys\_05\_2 4729 FTMS; HCD 203.76 658.28

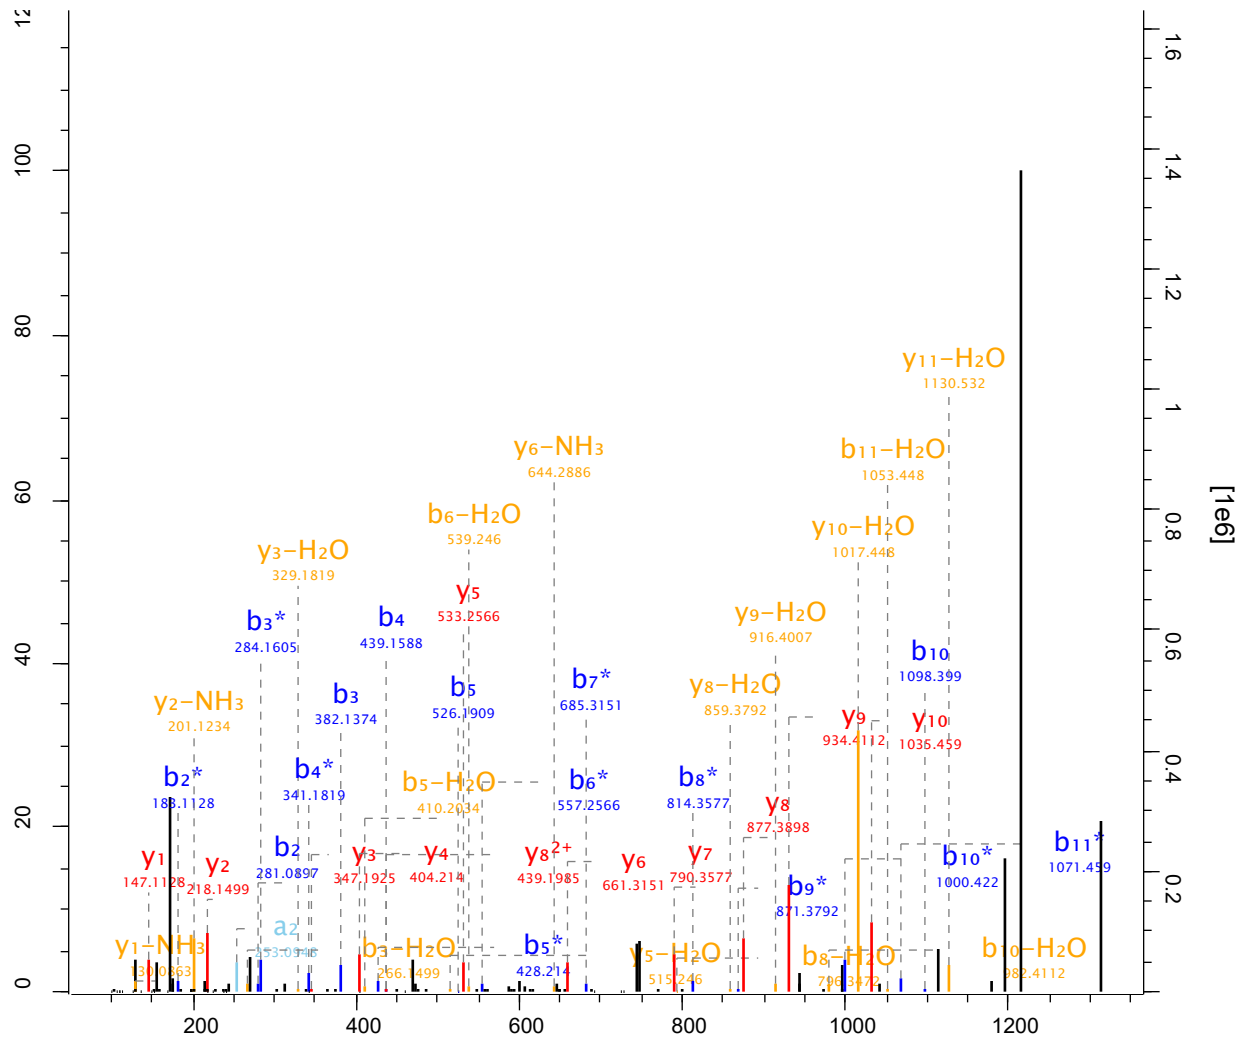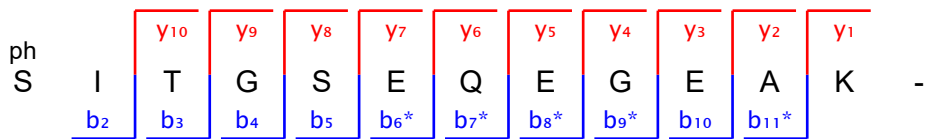

| Raw file | Scan | Method    | Score | m/z    |
|----------|------|-----------|-------|--------|
| sys_05_2 | 4834 | FTMS; HCD | 68.68 | 599.74 |

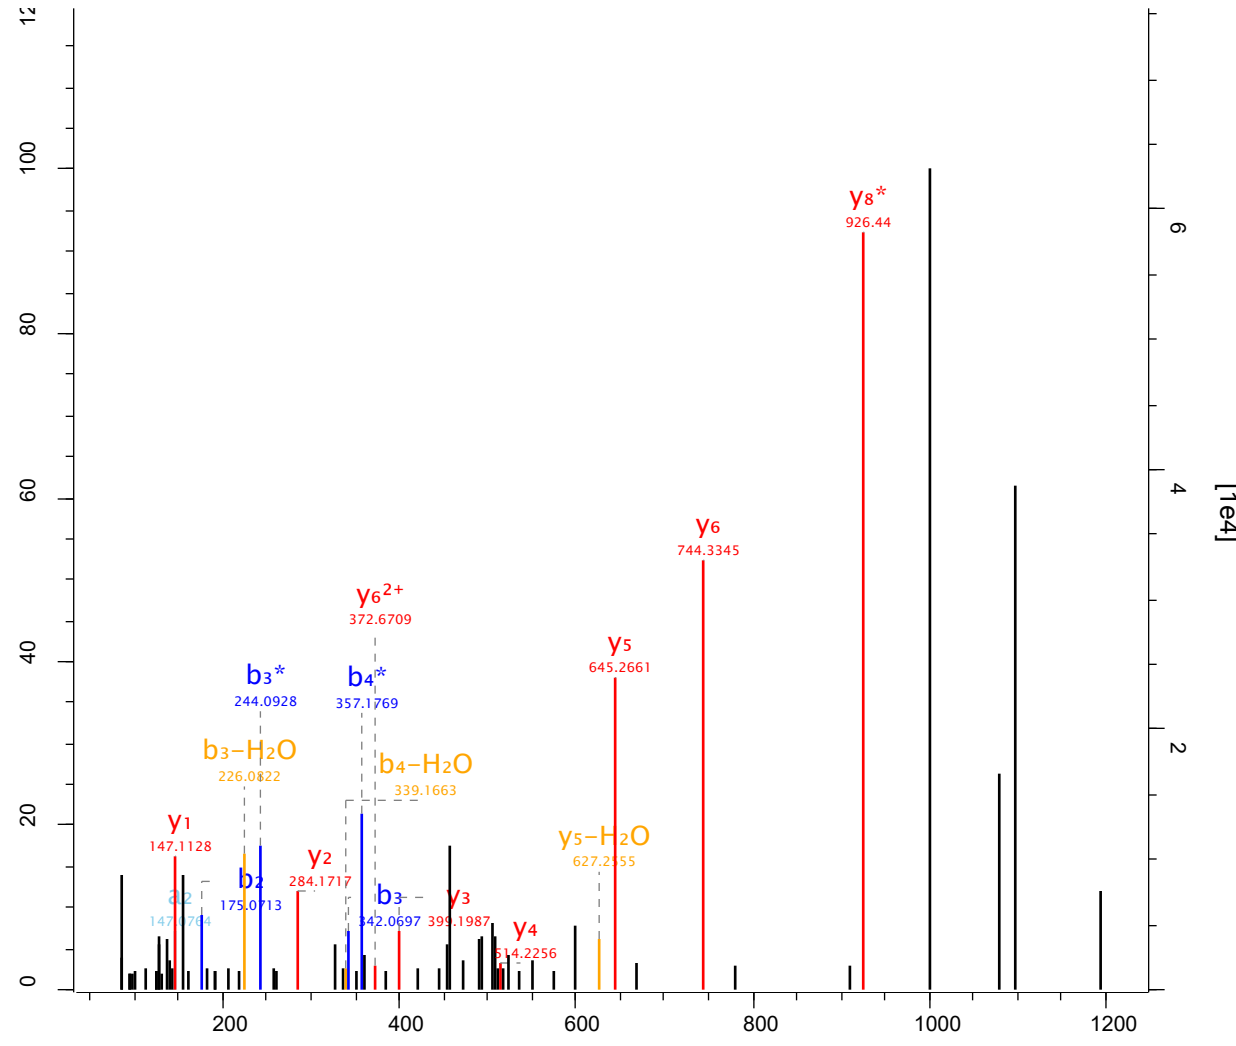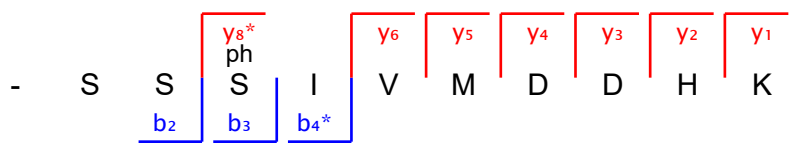

Raw file Scan Method Score m/z  
 sys\_05\_2 4870 FTMS; HCD 179.6 507.72

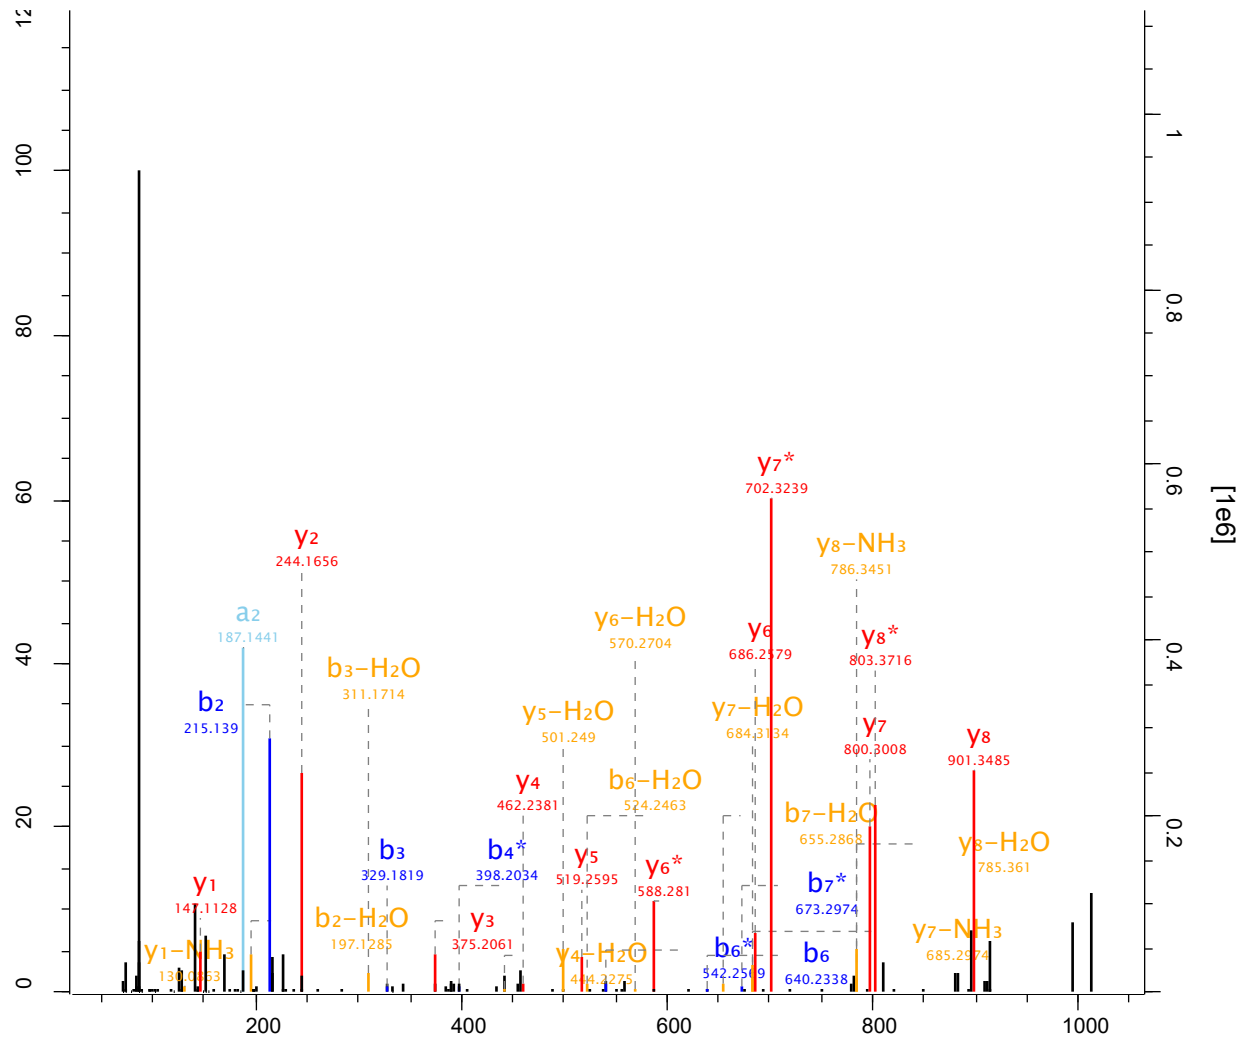

- L T N S G S M P K -

y<sub>8</sub>
y<sub>7</sub>
y<sub>6</sub>  
ph
y<sub>5</sub>
y<sub>4</sub>
y<sub>3</sub>
y<sub>2</sub>
y<sub>1</sub>

b<sub>2</sub>
b<sub>3</sub>
b<sub>4</sub>\*
b<sub>6</sub>
b<sub>7</sub>\*

Raw file Scan Method Score m/z  
 sys\_05\_2 49176 FTMS; HCD 111.57 994.41

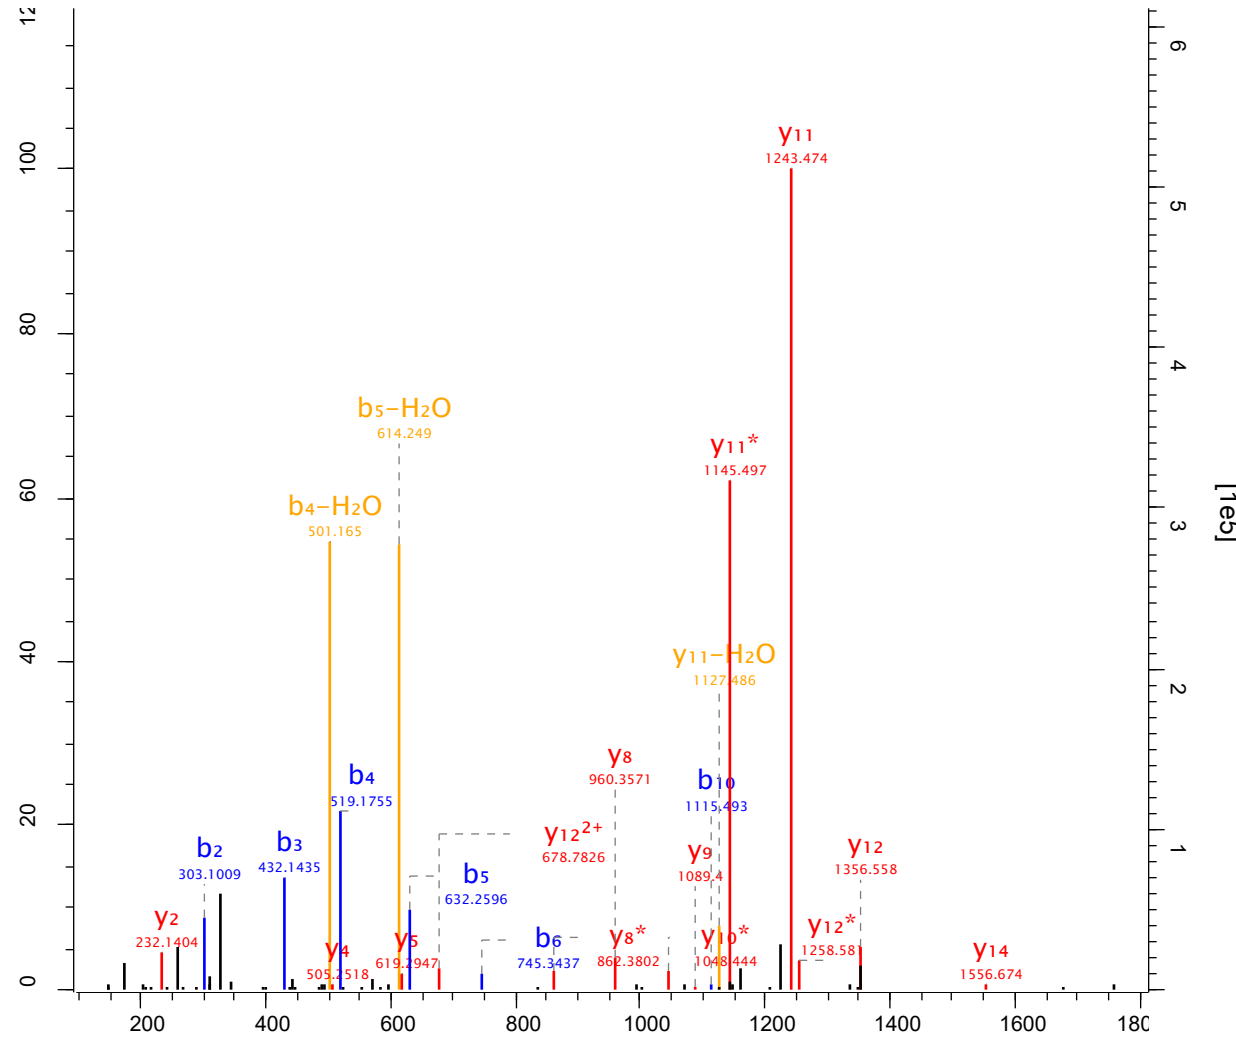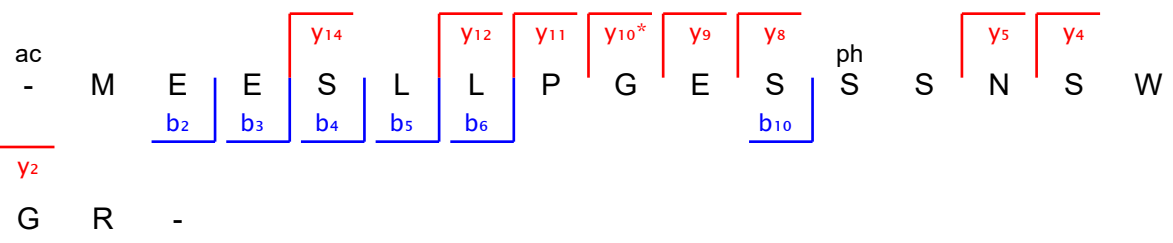

Raw file Scan Method Score m/z  
 sys\_05\_2 49177 FTMS; HCD 50.3 738.31

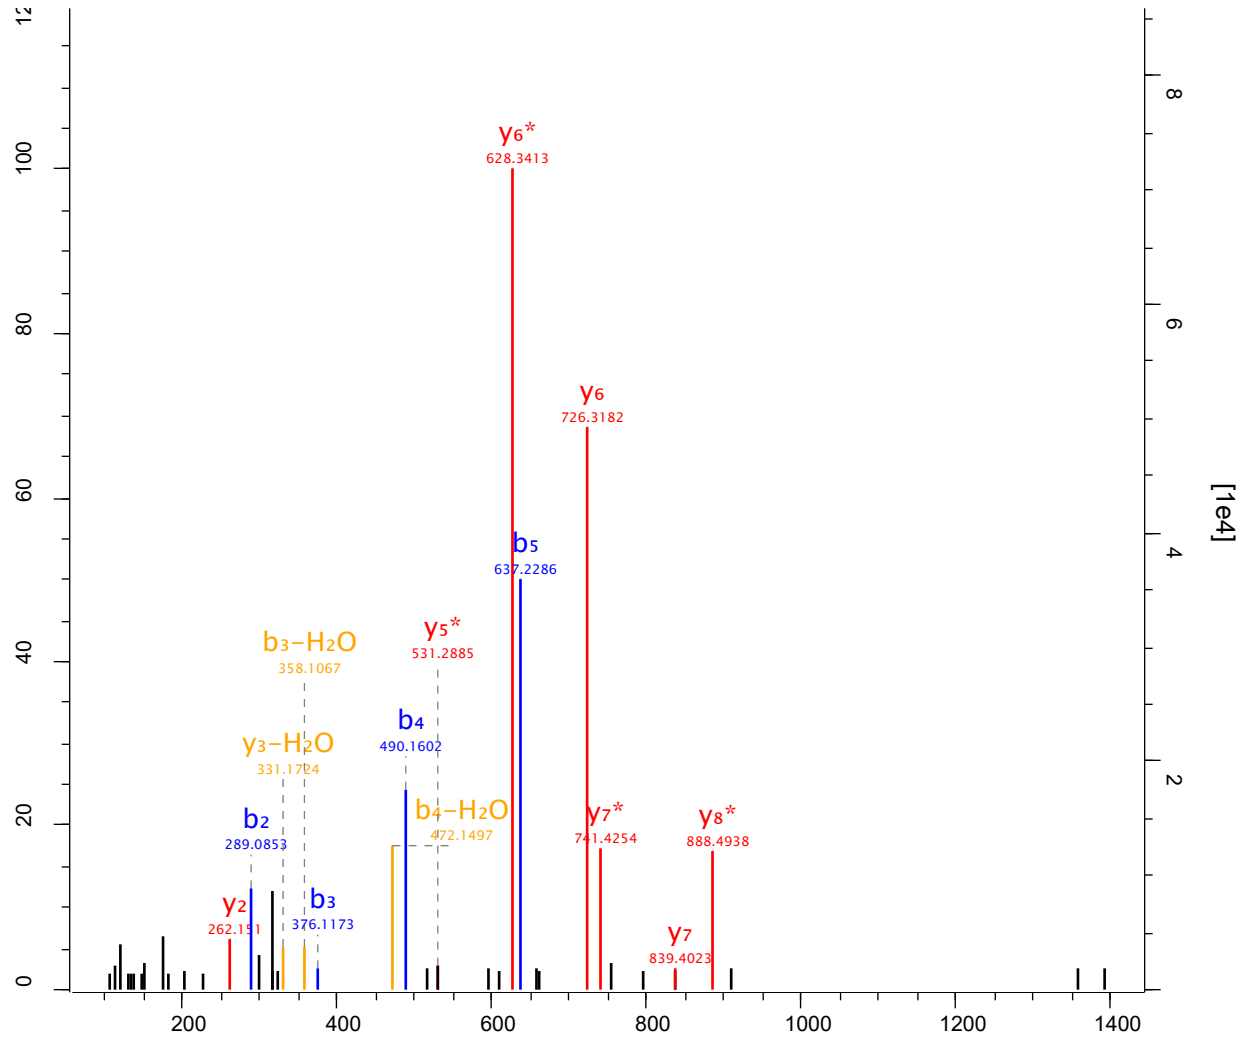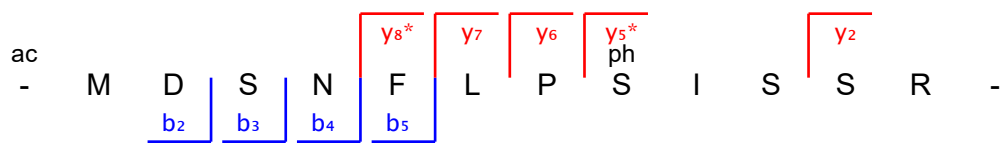

Raw file Scan Method Score m/z  
 sys\_05\_2 5204 FTMS; HCD 67.33 554.73

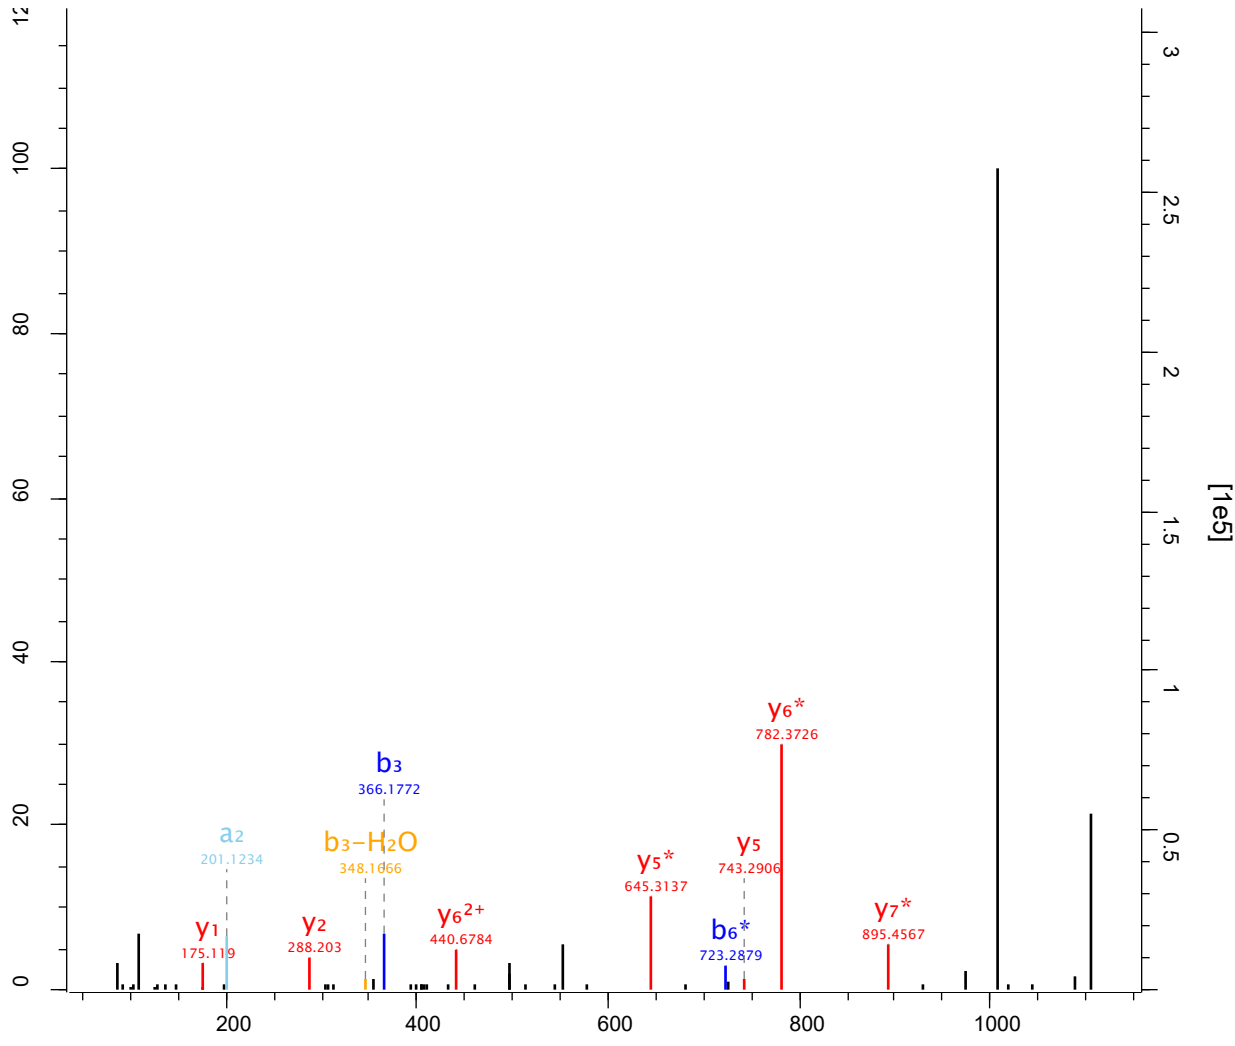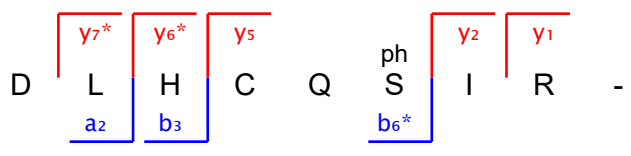



| Raw file | Scan | Method    | Score | m/z    |
|----------|------|-----------|-------|--------|
| sys_05_2 | 5273 | FTMS; HCD | 68.66 | 508.75 |

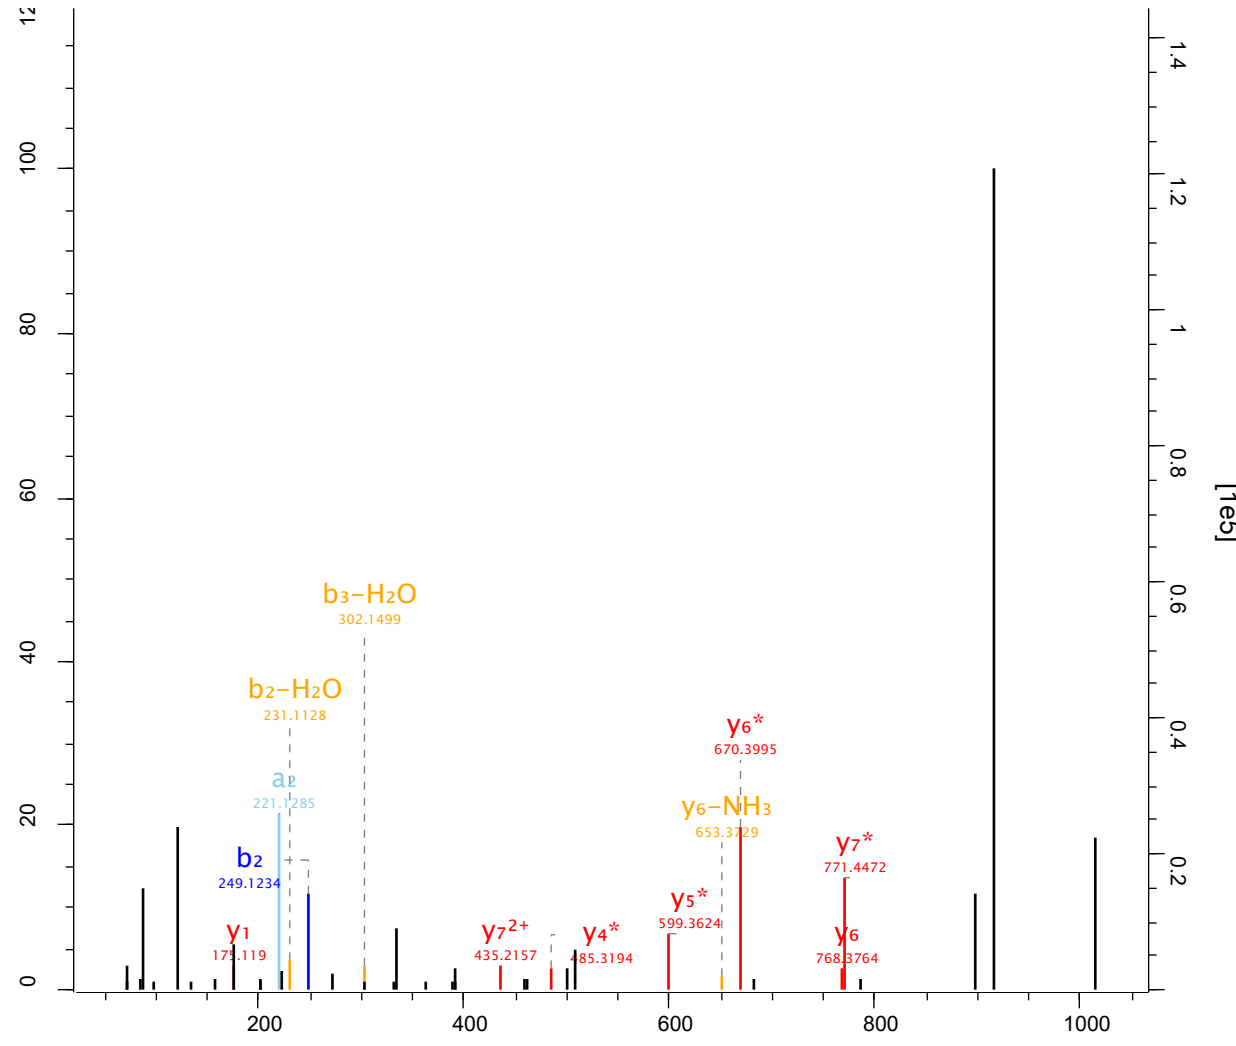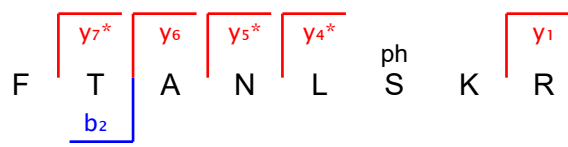

Raw file Scan Method Score m/z  
 sys\_05\_2 5406 FTMS; HCD 107.35 684.28

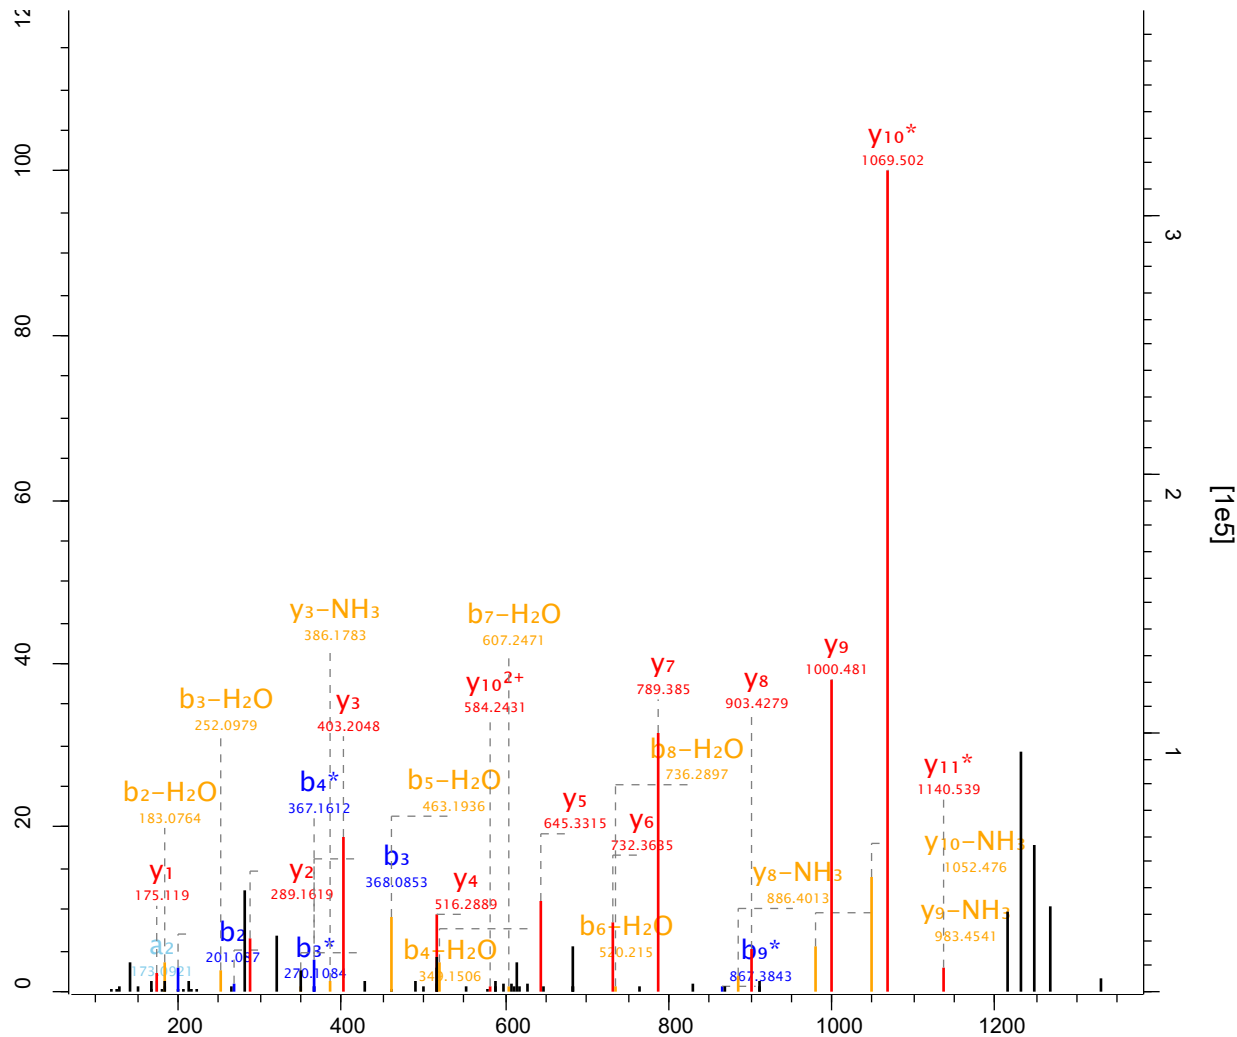

- E A S P N G S E I N N R -

b<sub>2</sub>
b<sub>3</sub>
b<sub>4</sub><sup>\*</sup>
b<sub>9</sub><sup>\*</sup>

y<sub>11</sub><sup>\*</sup>
y<sub>10</sub><sup>\*</sup>
y<sub>9</sub>
y<sub>8</sub>
y<sub>7</sub>
y<sub>6</sub>
y<sub>5</sub>
y<sub>4</sub>
y<sub>3</sub>
y<sub>2</sub>
y<sub>1</sub>



Raw file Scan Method Score m/z  
 sys\_05\_2 5630 FTMS; HCD 68.54 452.69

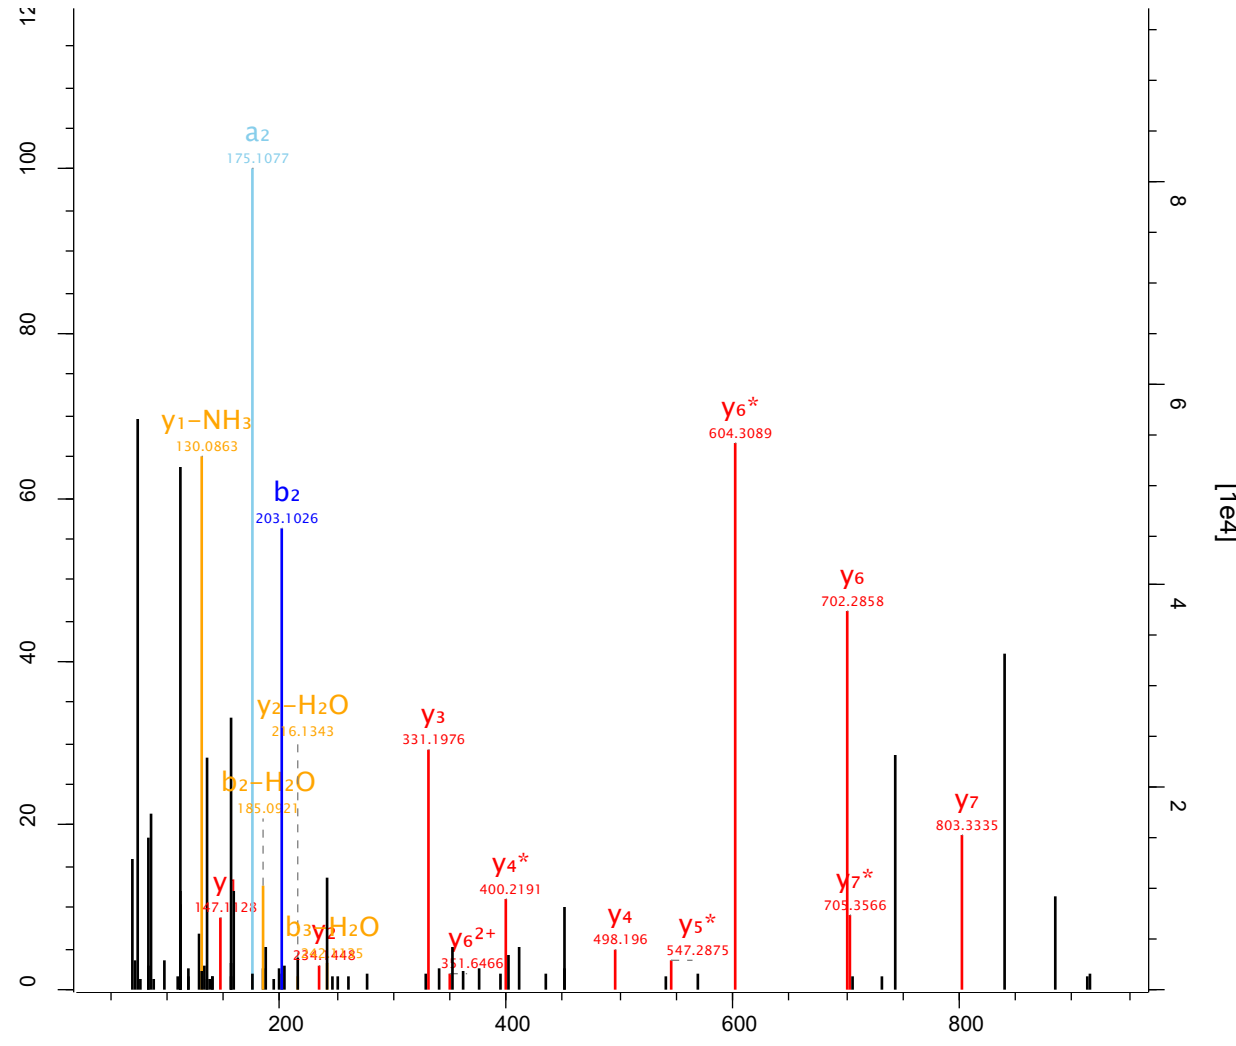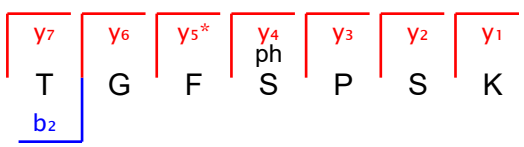

Raw file Scan Method Score m/z  
 sys\_05\_2 5681 FTMS; HCD 311.16 895.86

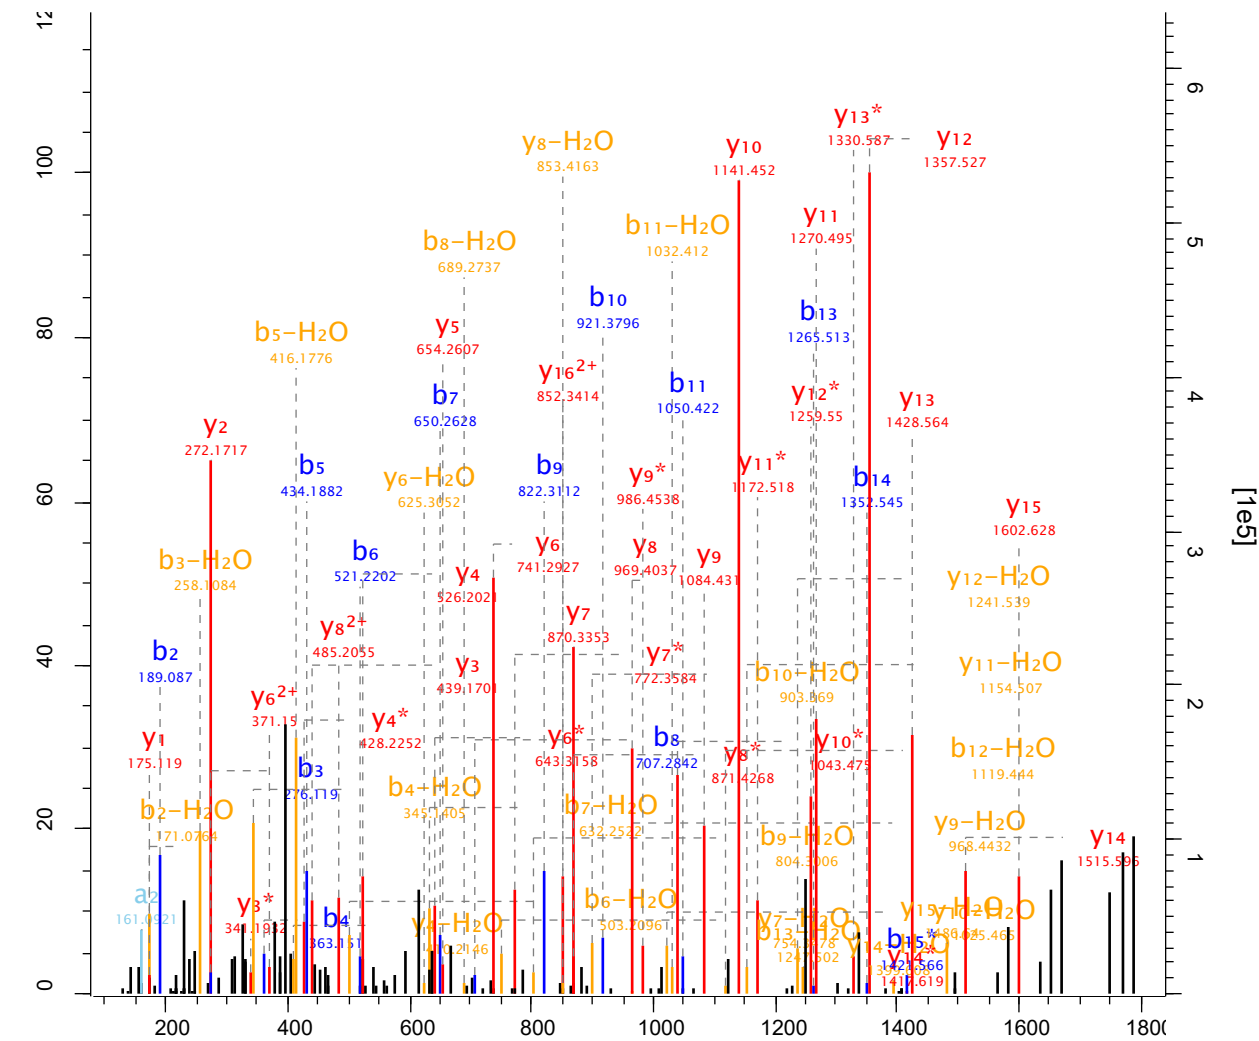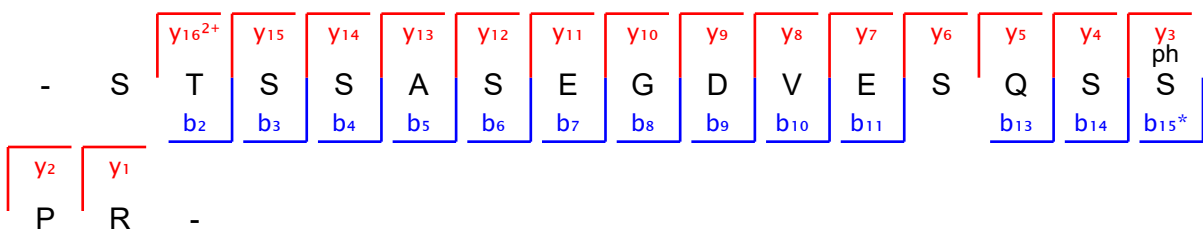

Raw file Scan Method Score m/z  
 sys\_05\_2 5694 FTMS; HCD 194.58 769.81

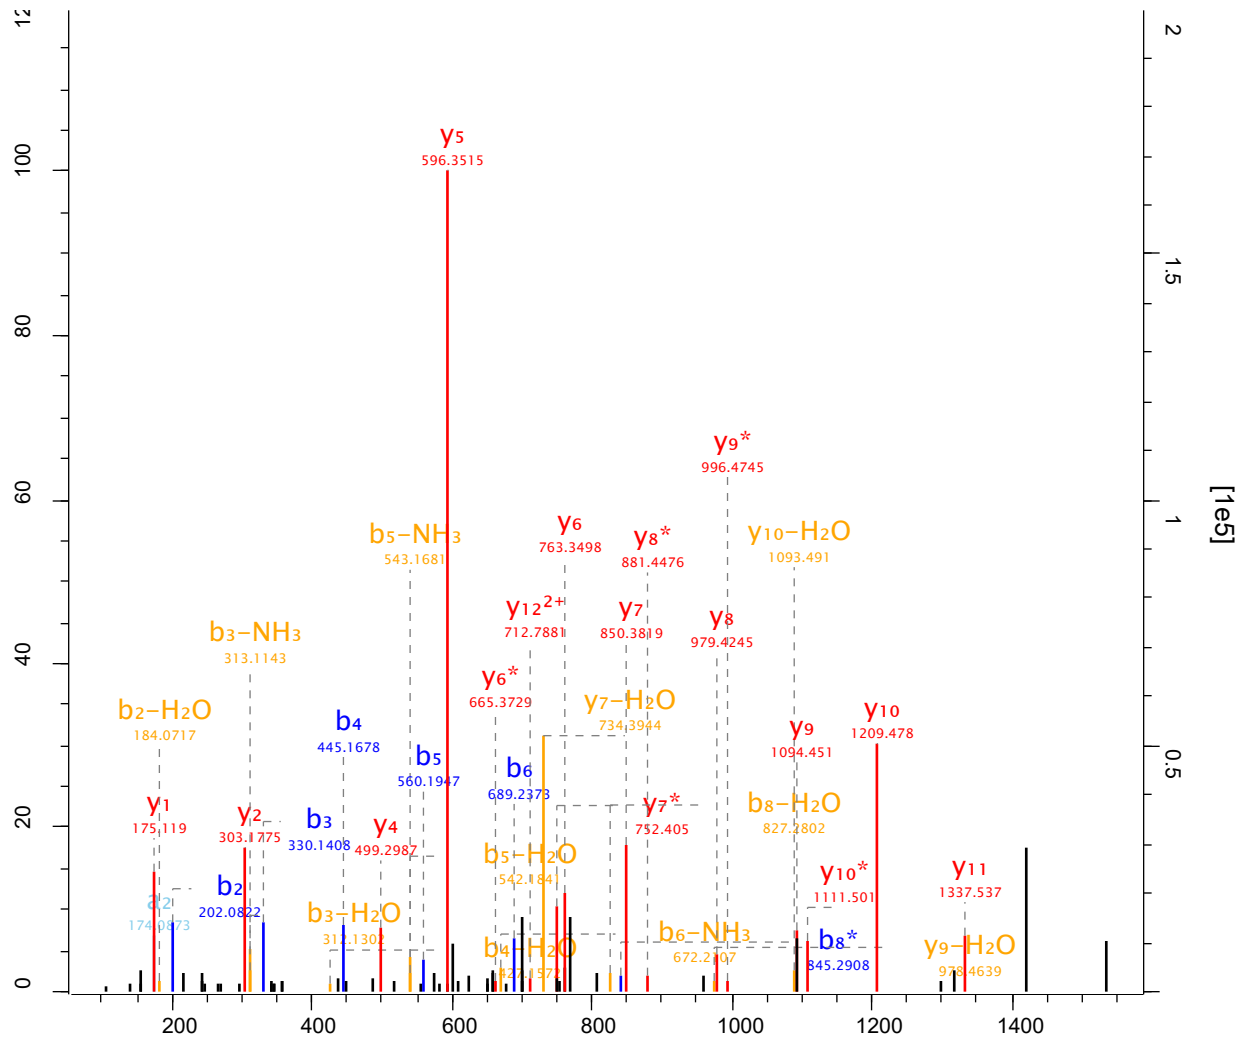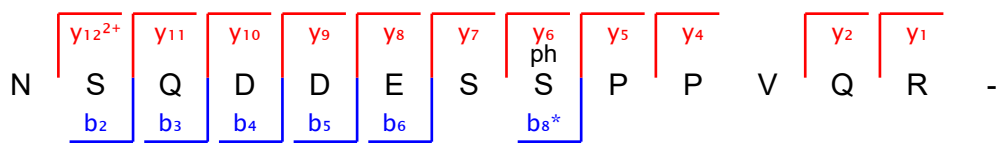

Raw file Scan Method Score m/z  
 sys\_05\_2 5859 FTMS; HCD 206.63 684.3

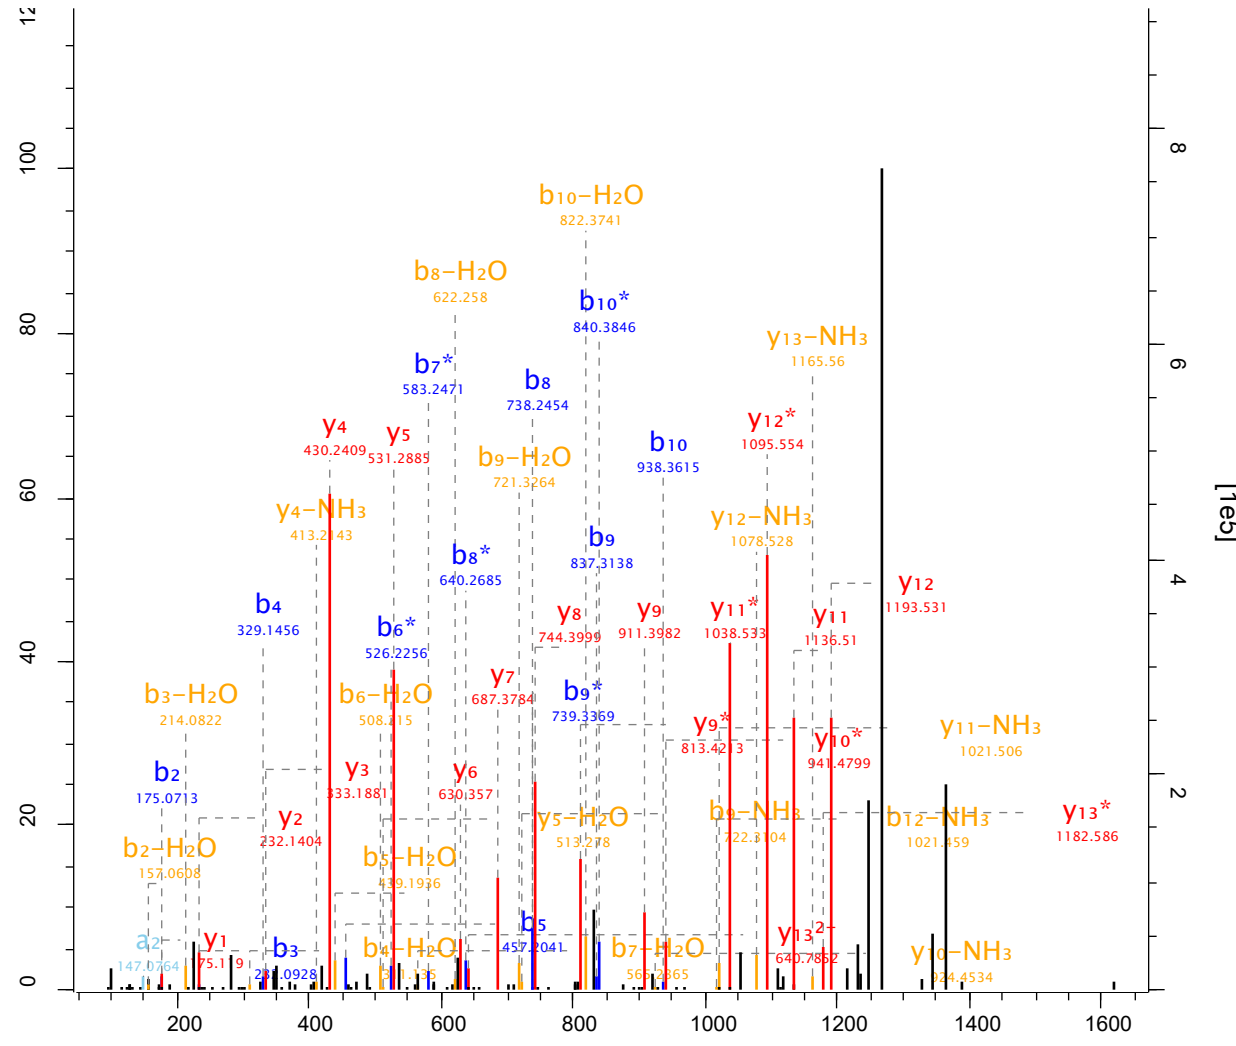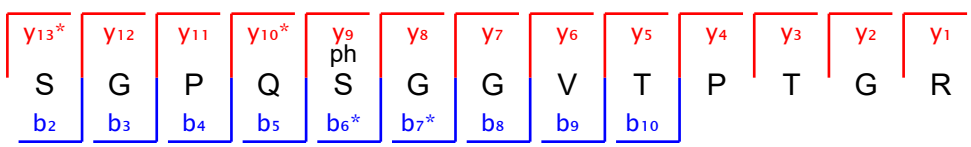

Raw file Scan Method Score m/z  
 sys\_05\_2 6060 FTMS; HCD 123.76 618.77

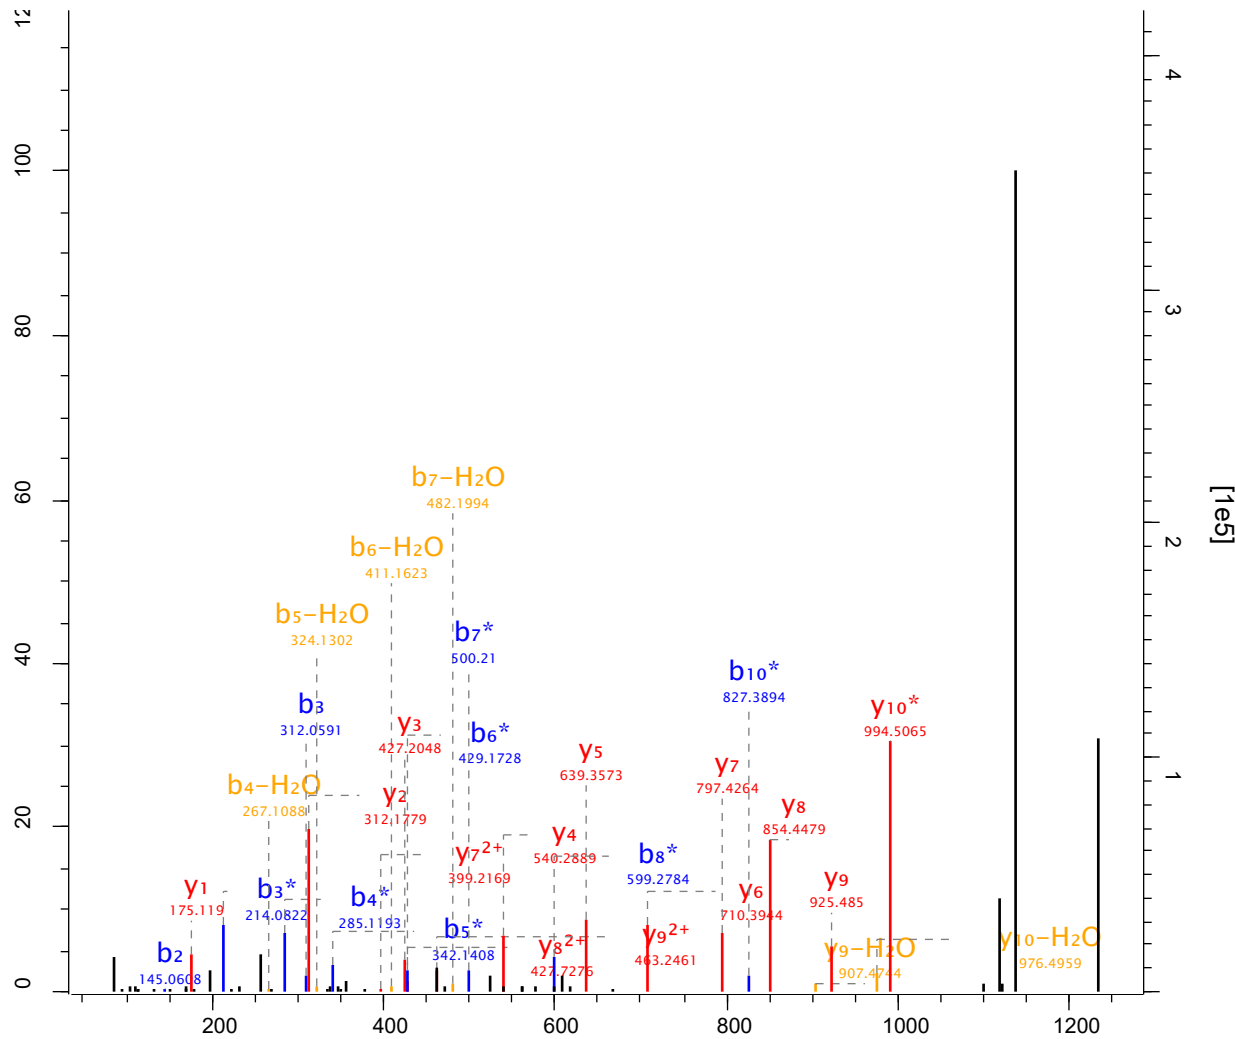

- S G y<sub>10</sub>\* y<sub>9</sub> y<sub>8</sub> y<sub>7</sub> y<sub>6</sub> y<sub>5</sub> y<sub>4</sub> y<sub>3</sub> y<sub>2</sub> y<sub>1</sub> -  
b<sub>2</sub> b<sub>3</sub> b<sub>4</sub>\* b<sub>5</sub>\* b<sub>6</sub>\* b<sub>7</sub>\* b<sub>8</sub>\* L b<sub>10</sub>\* H R -



Raw file Scan Method Score m/z  
 sys\_05\_2 6073 FTMS; HCD 151.18 676.6

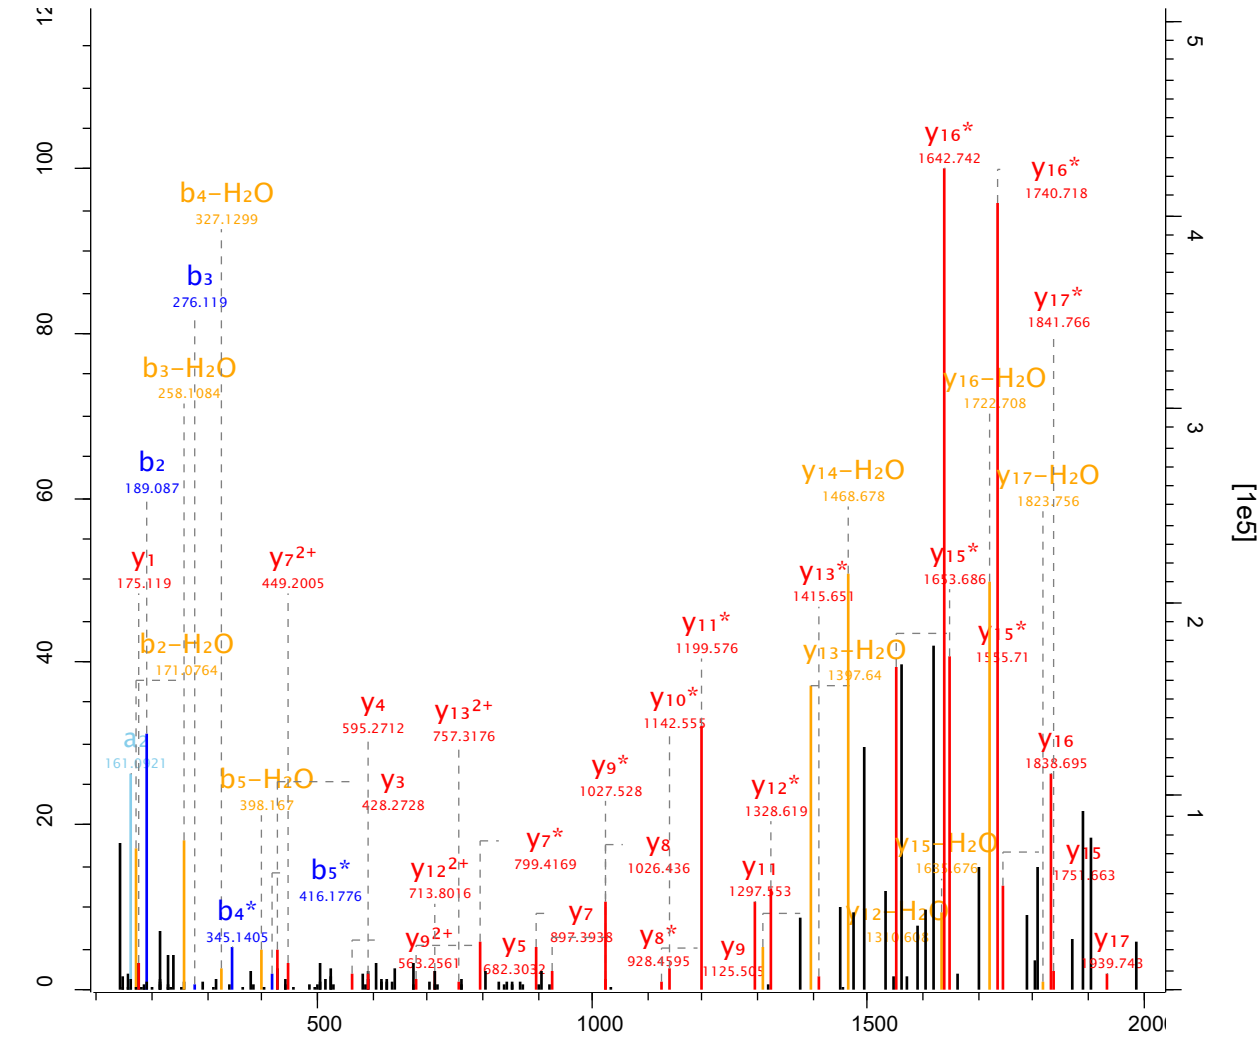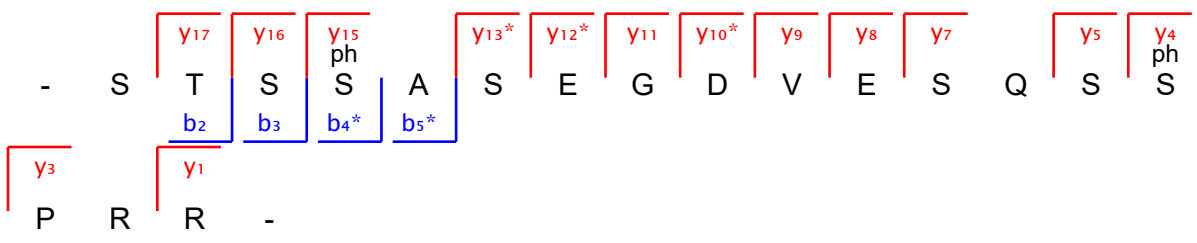

Raw file Scan Method Score m/z  
 sys\_05\_2 6121 FTMS; HCD 85.68 431.71

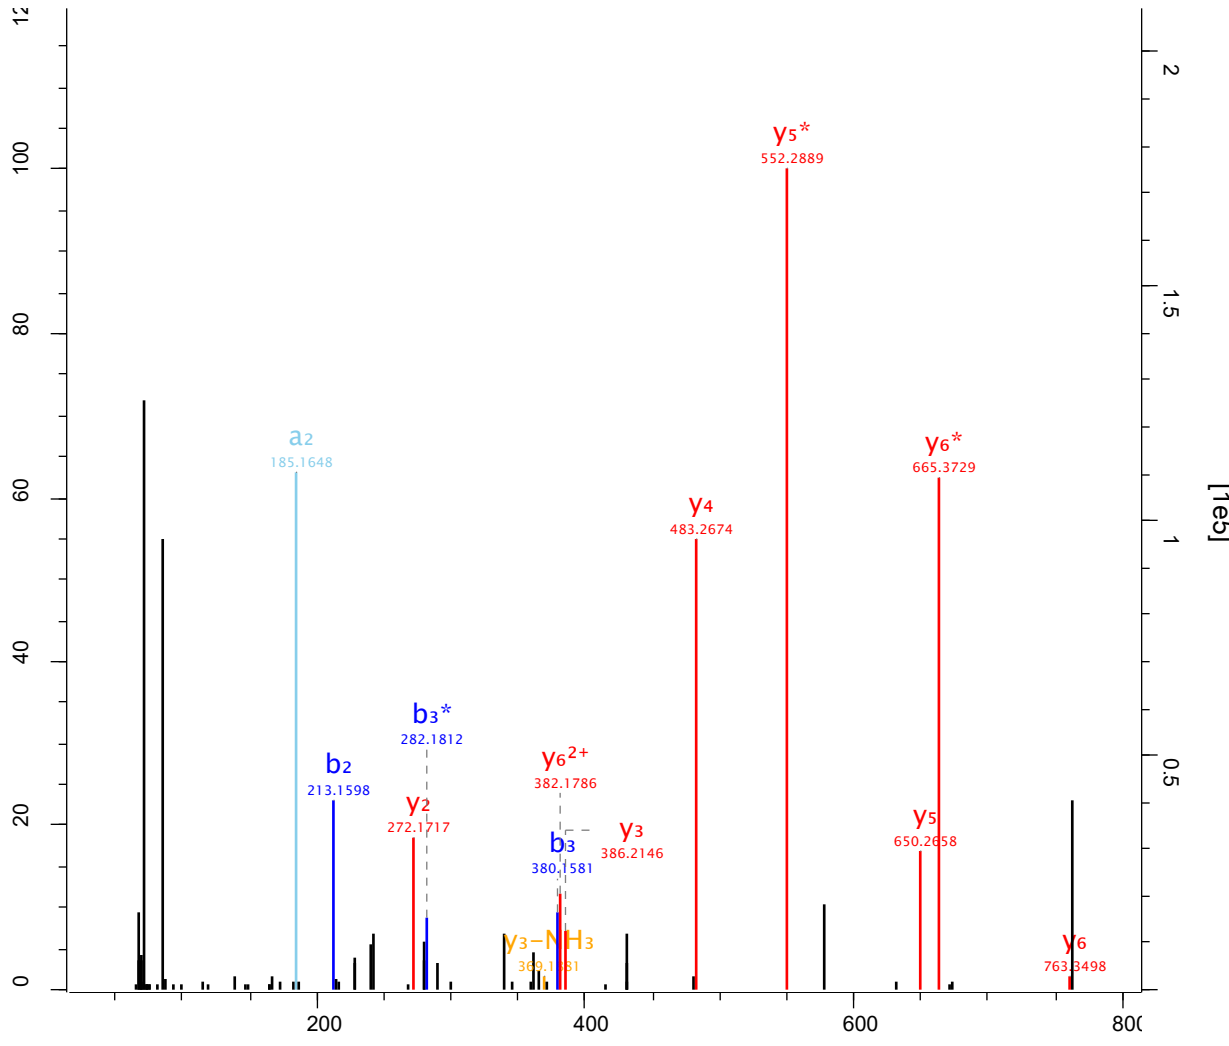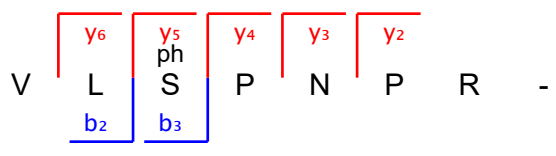

Raw file Scan Method Score m/z  
 sys\_05\_2 6151 FTMS; HCD 144.97 739.83

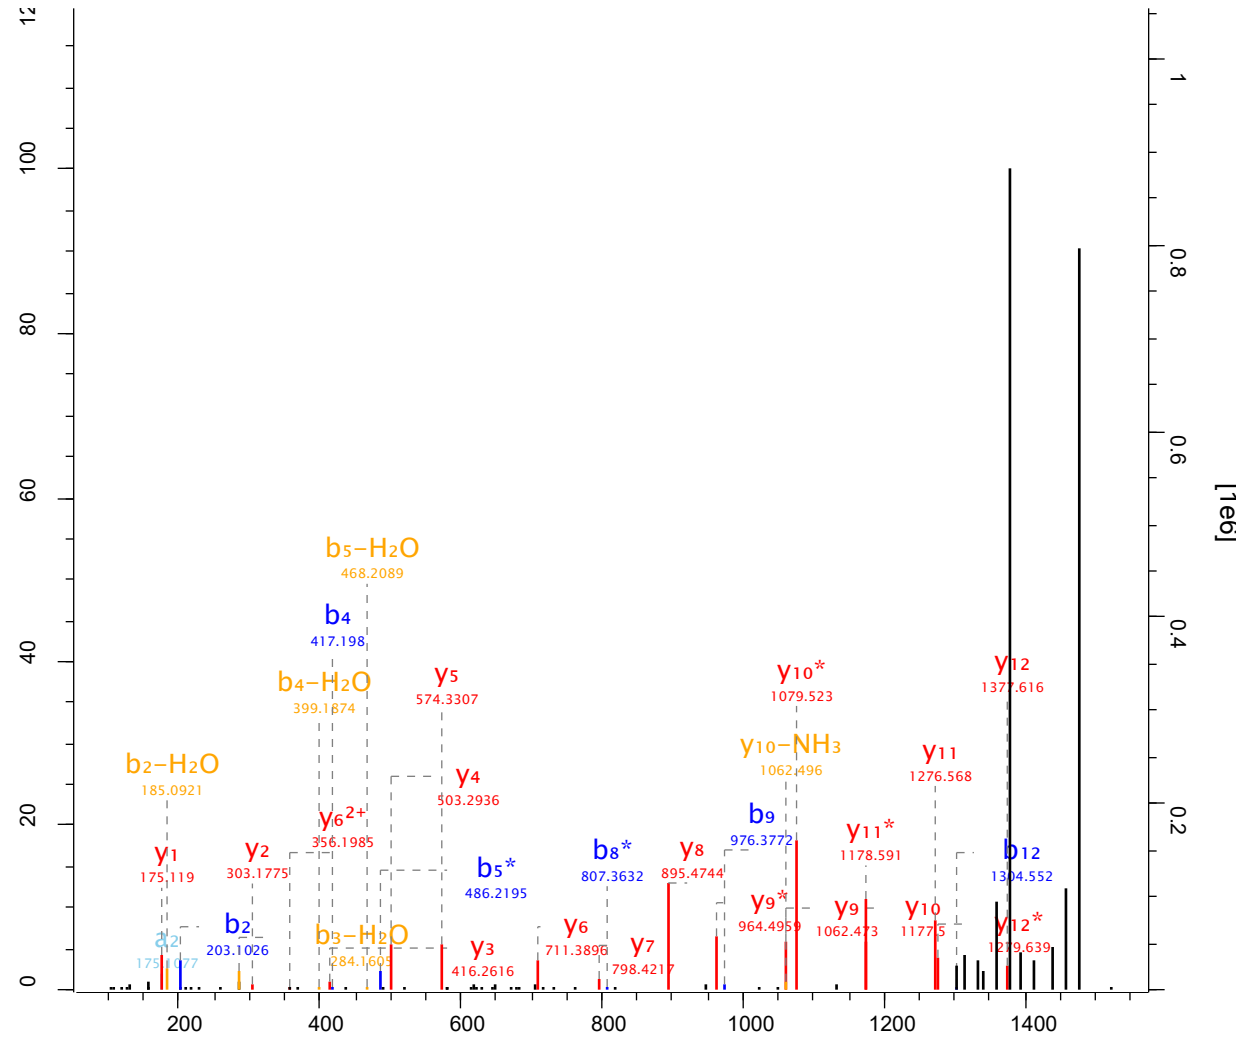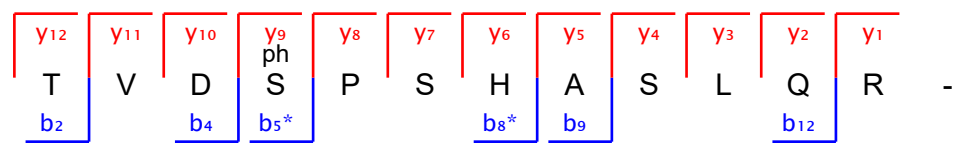

Raw file Scan Method Score m/z  
 sys\_05\_2 6228 FTMS; HCD 95.48 585.77

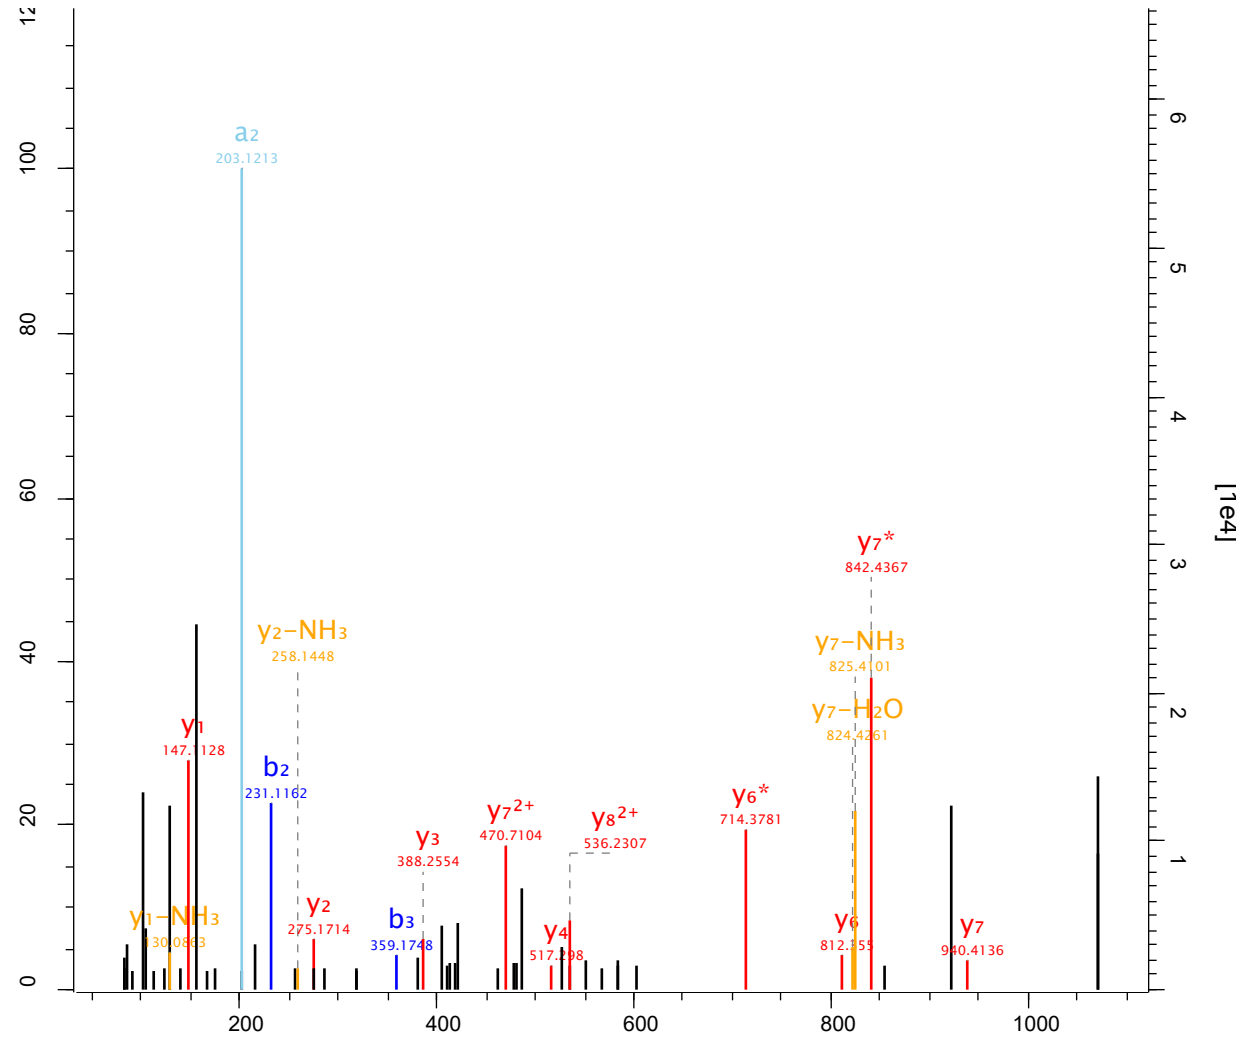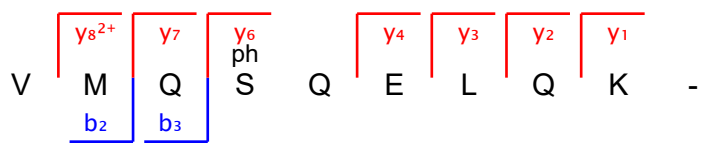

Raw file Scan Method Score m/z  
 sys\_05\_2 6346 FTMS; HCD 204.63 736.8

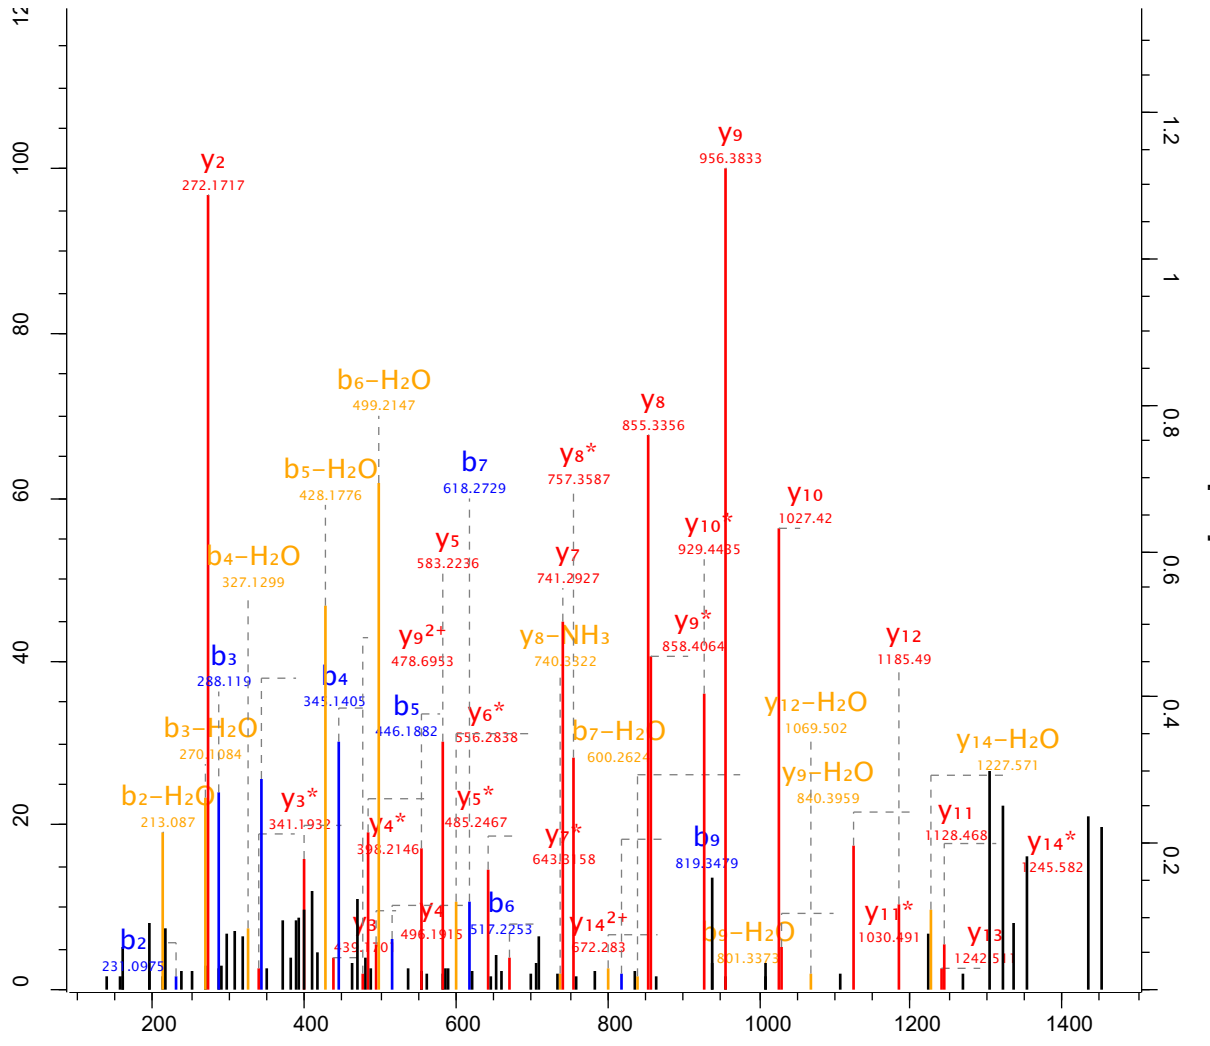

ac  
 - S T G G T A T N S A S G S P R  
 -  
 -

Fragmentation mapping showing b and y ions corresponding to the peptide sequence: S T G G T A T N S A S G S P R. The b ions (blue) are b<sub>2</sub> through b<sub>9</sub>, and the y ions (red) are y<sub>2</sub> through y<sub>14</sub>. The sequence is shown with brackets indicating the fragmentation sites.

Raw file Scan Method Score m/z  
 sys\_05\_2 6385 FTMS; HCD 127.32 622.29

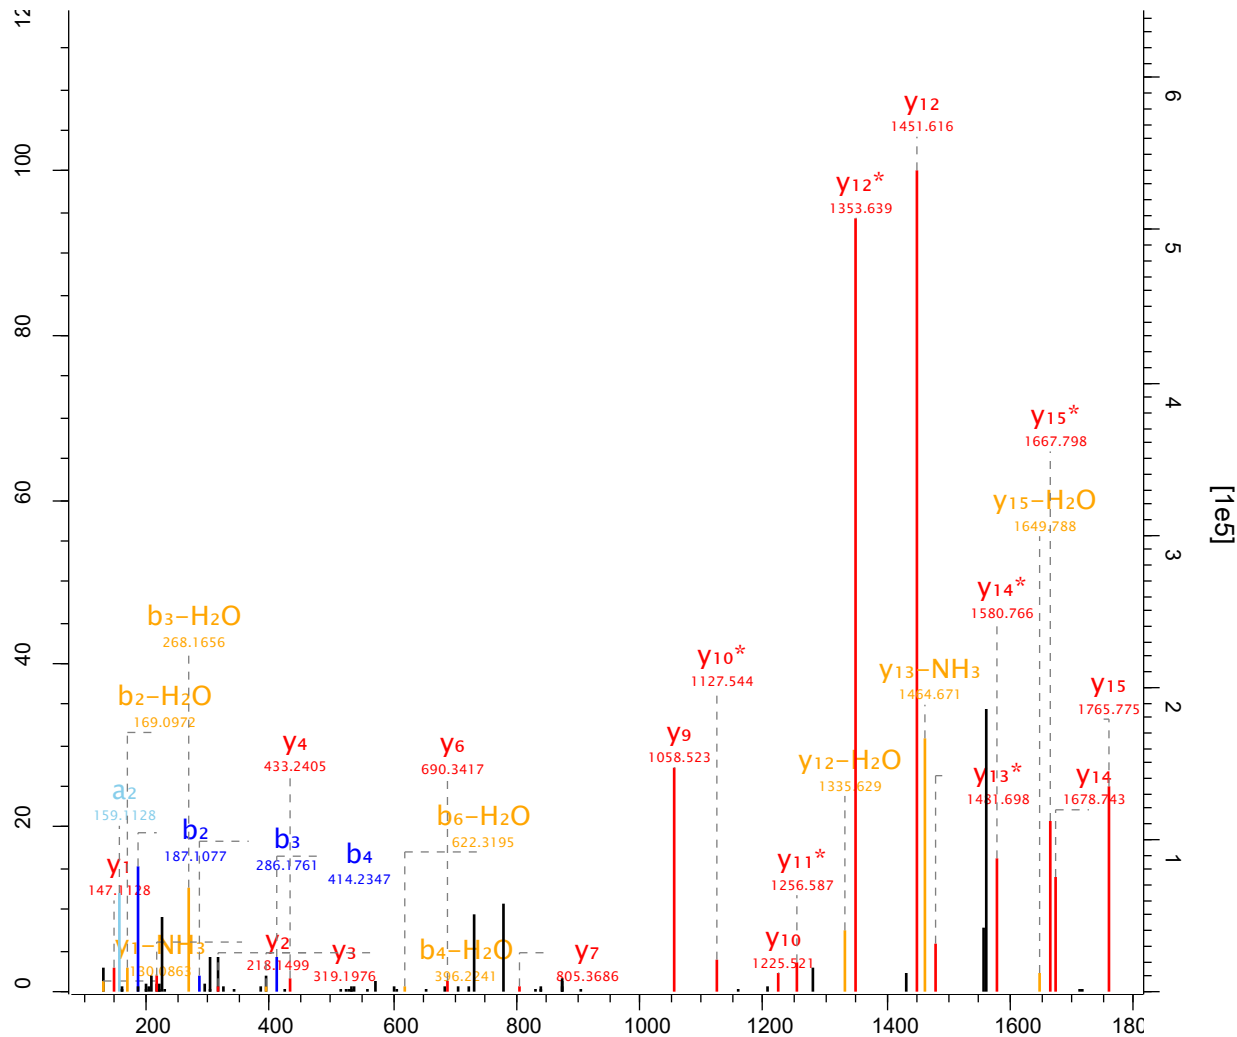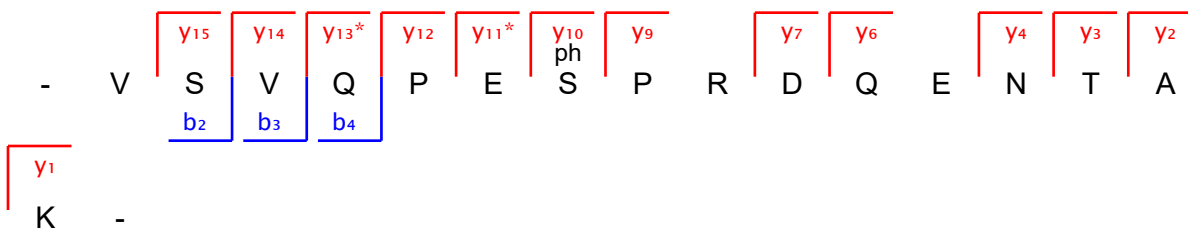

Raw file Scan Method Score m/z  
 sys\_05\_2 6423 FTMS; HCD 140.93 515.88

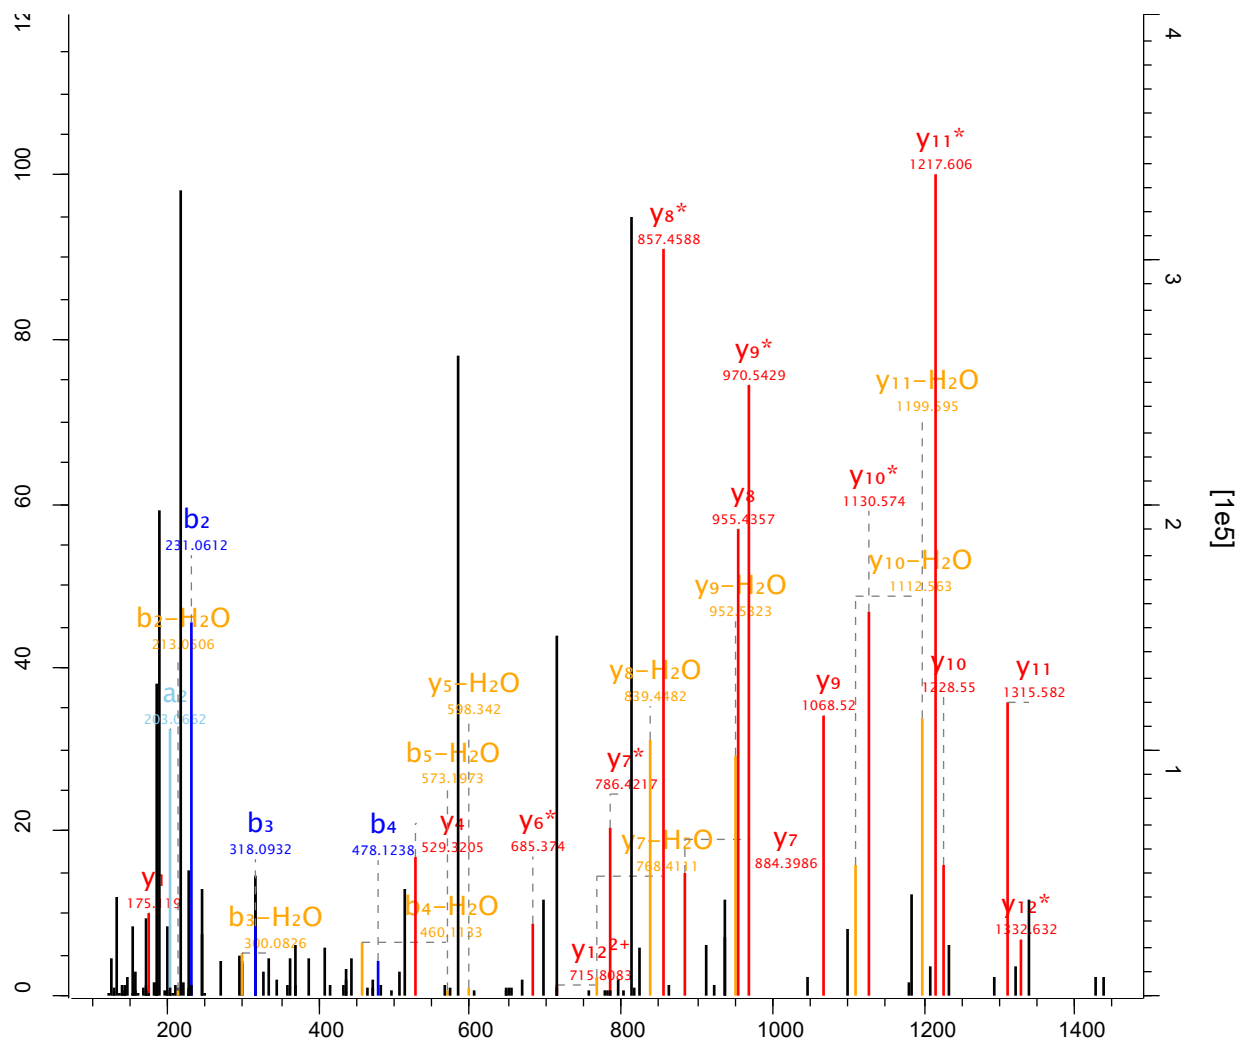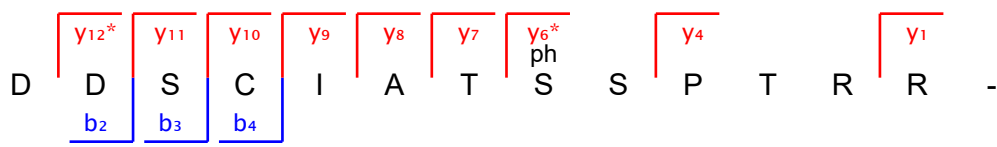

Raw file Scan Method Score m/z  
 sys\_05\_2 6453 FTMS; HCD 137.45 789.3

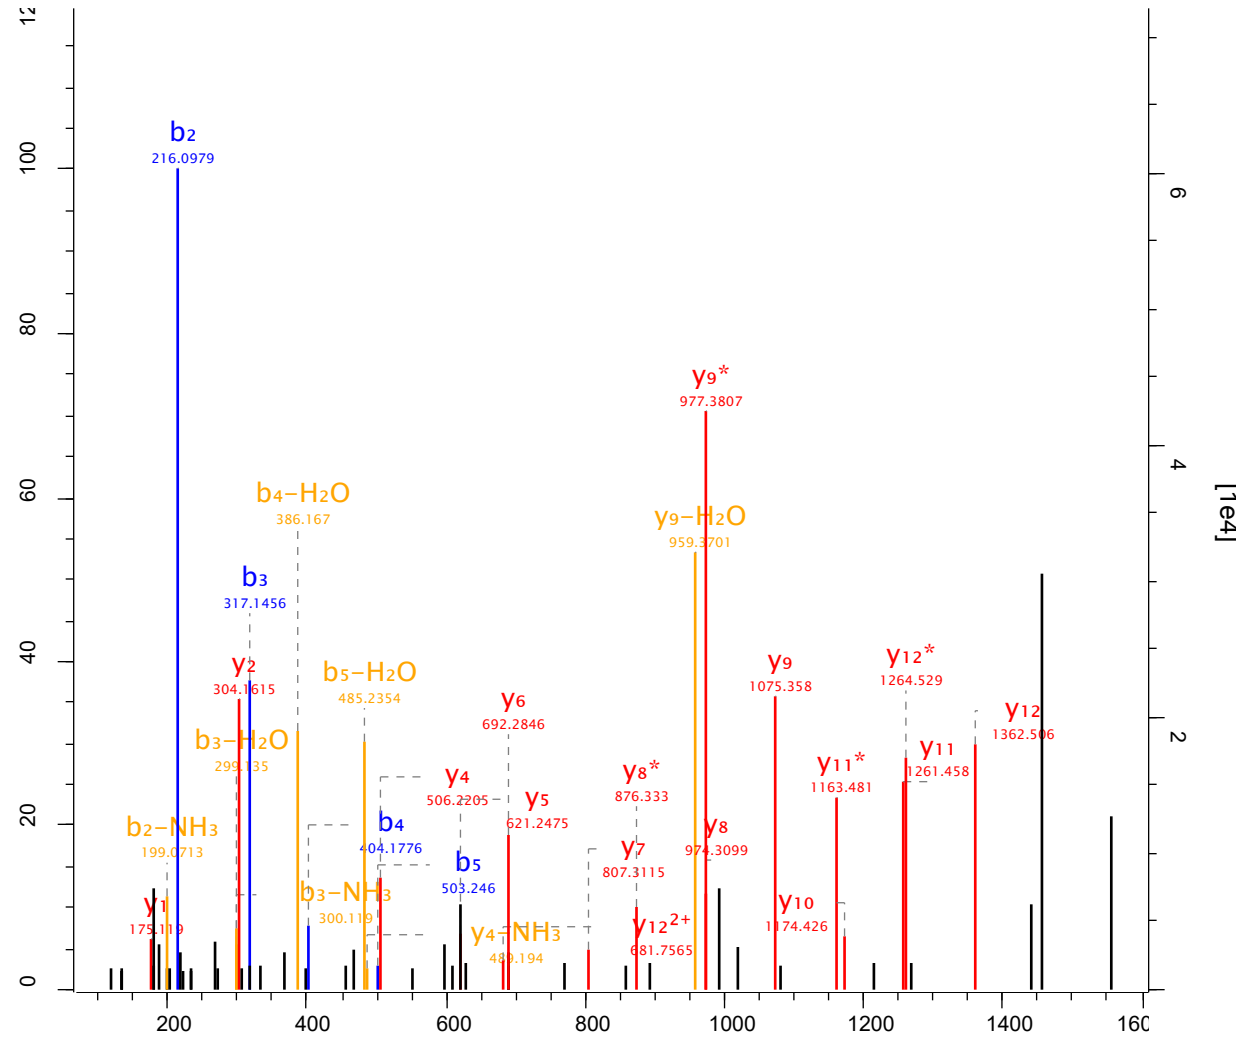

- S Q T S V T S D A D S D E R -

b<sub>2</sub>
b<sub>3</sub>
b<sub>4</sub>
b<sub>5</sub>
y<sub>12</sub>
y<sub>11</sub>
y<sub>10</sub>
y<sub>9</sub>
y<sub>8</sub>  
ph
y<sub>7</sub>
y<sub>6</sub>
y<sub>5</sub>
y<sub>4</sub>
y<sub>2</sub>
y<sub>1</sub>



Raw file Scan Method Score m/z  
 sys\_05\_2 6524 FTMS; HCD 95.85 585.76

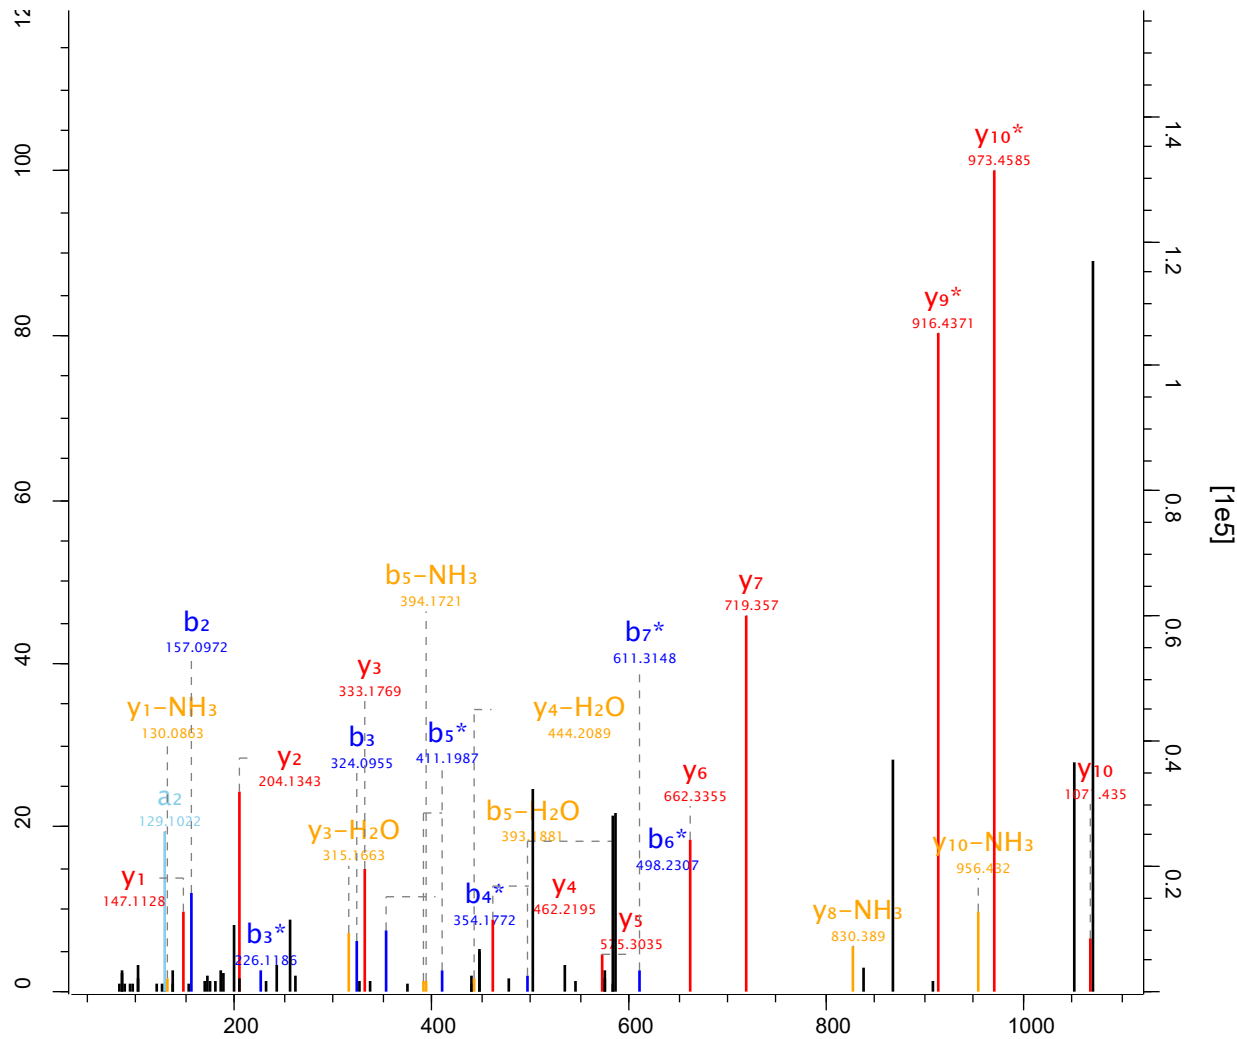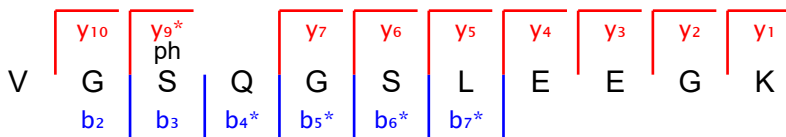

Raw file Scan Method Score m/z  
 sys\_05\_2 6539 FTMS; HCD 200.93 456.17

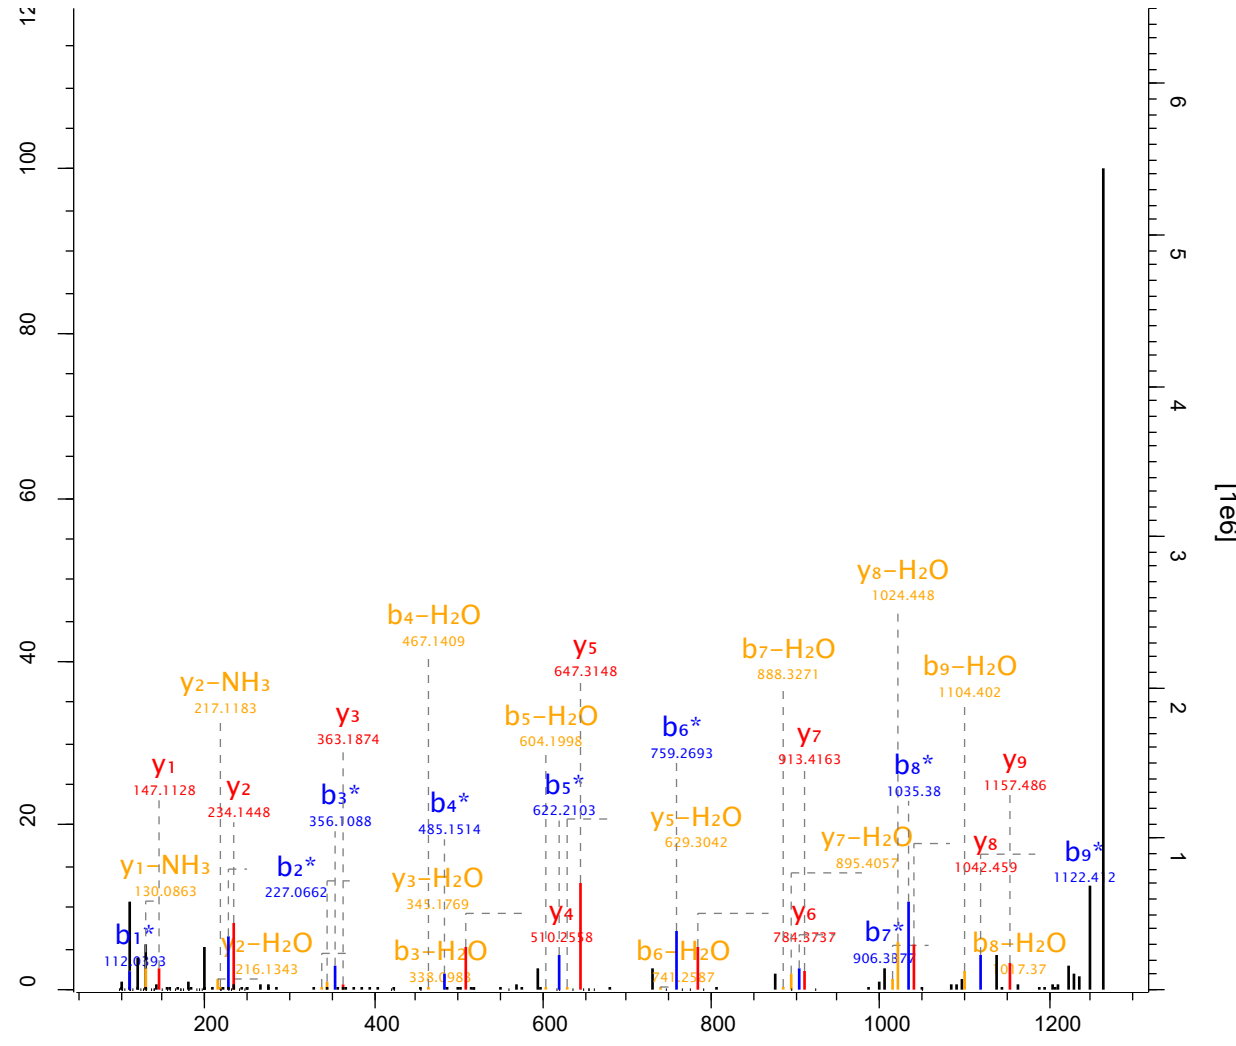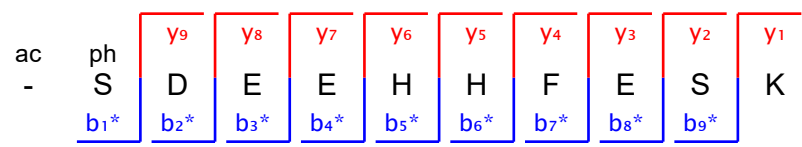

Raw file Scan Method Score m/z  
 sys\_05\_2 6588 FTMS; HCD 133.89 503.22

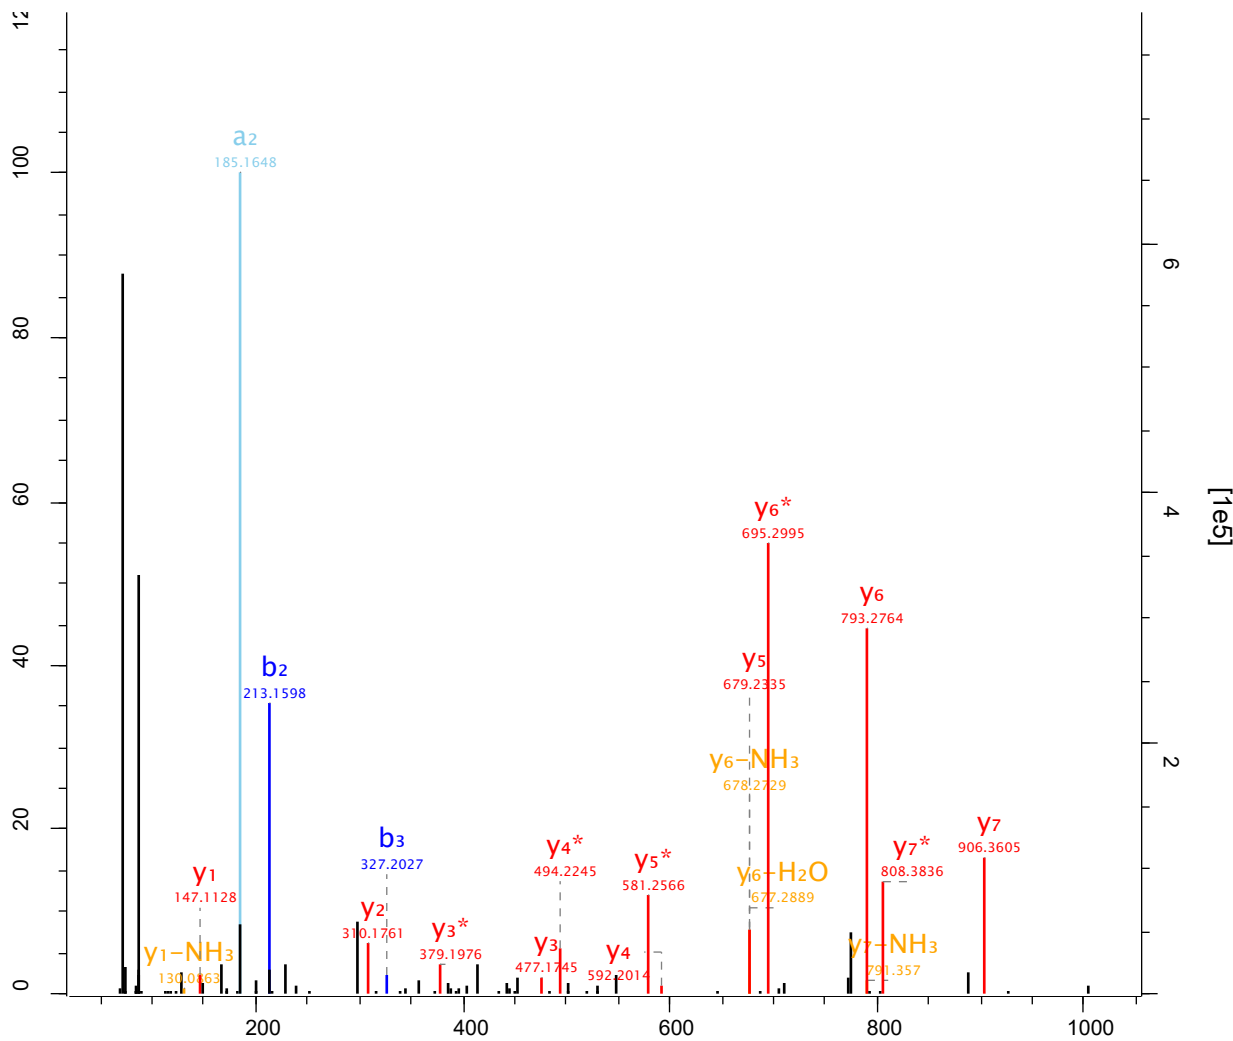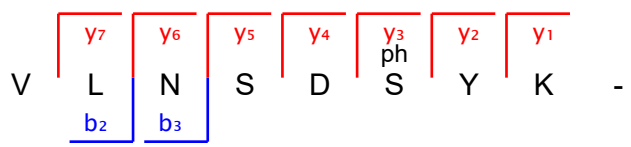

Raw file Scan Method Score m/z  
 sys\_05\_2 6614 FTMS; HCD 140.11 434.7

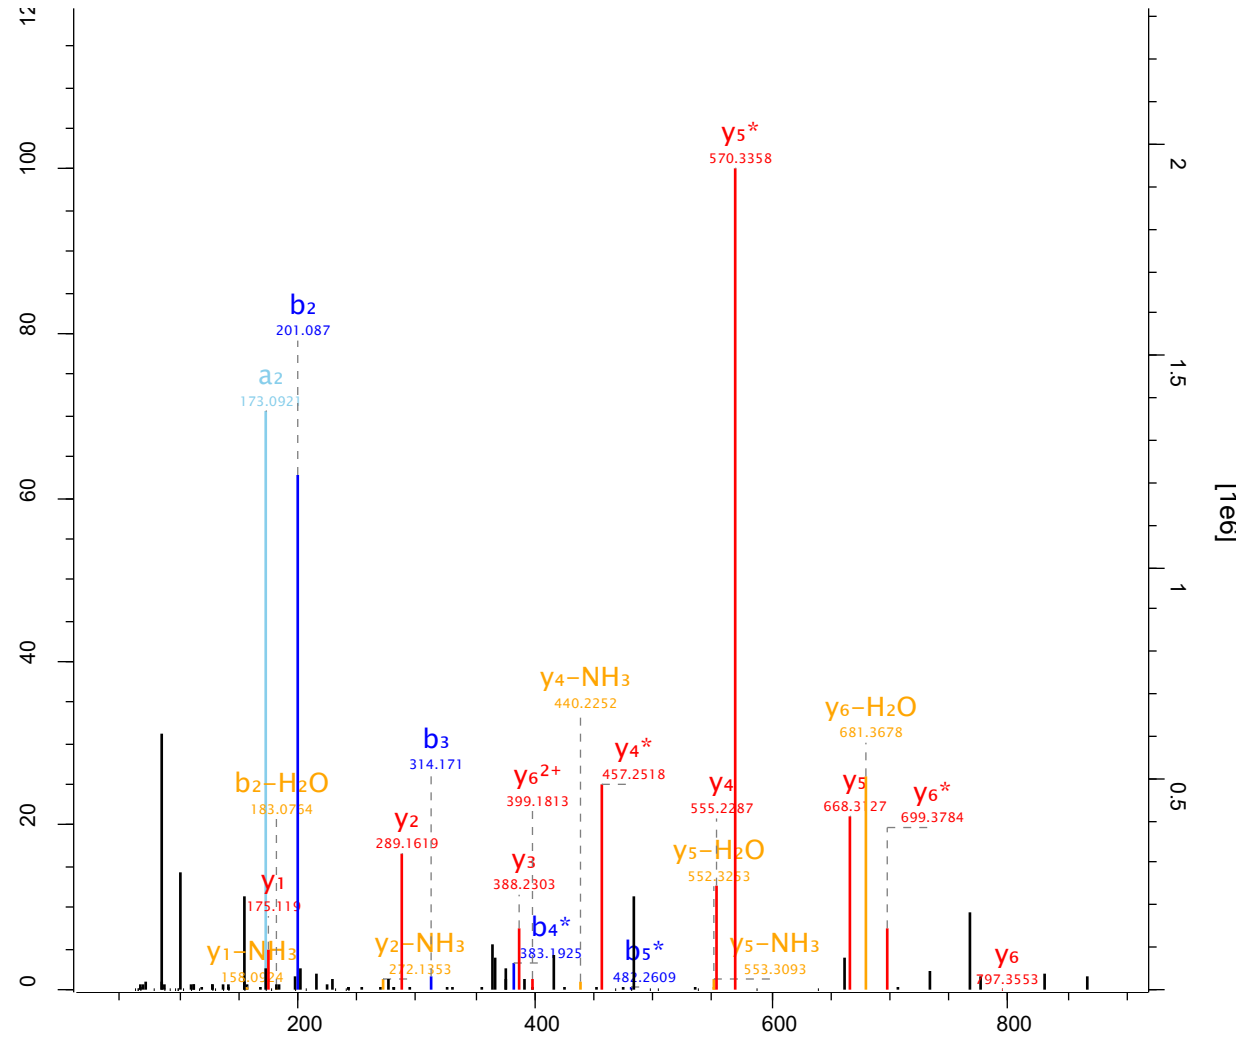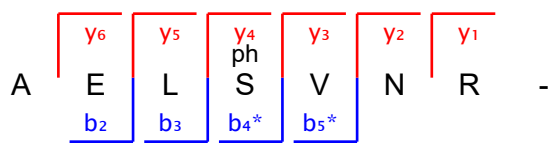

Raw file Scan Method Score m/z  
 sys\_05\_2 6624 FTMS; HCD 177.63 548.28

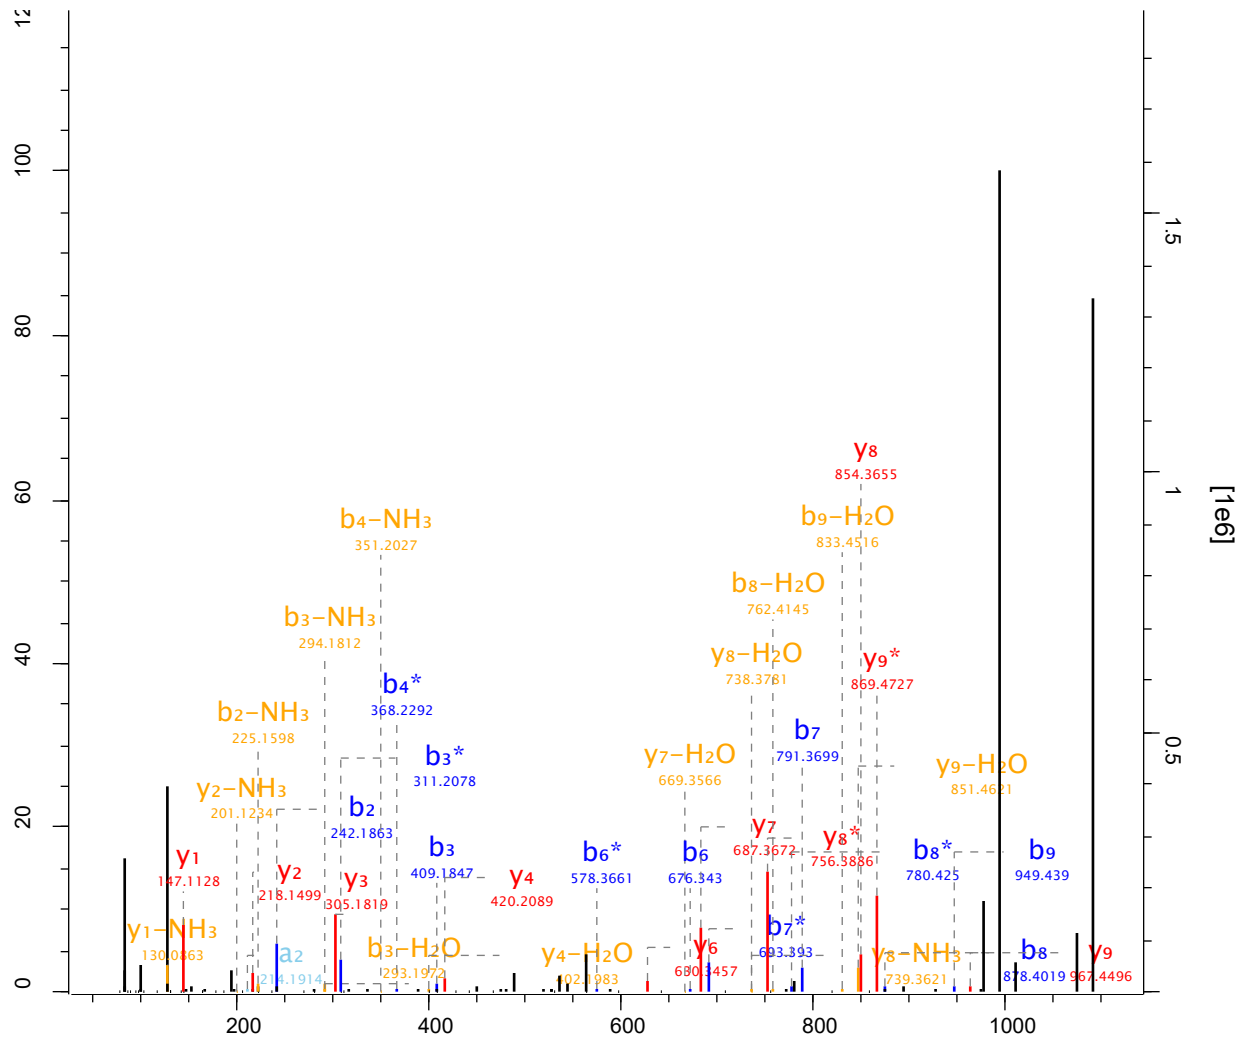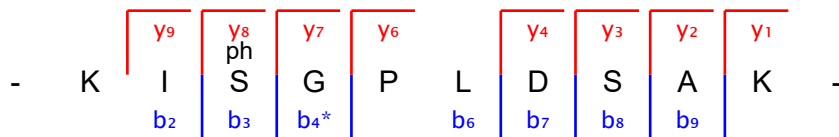

Raw file Scan Method Score m/z  
 sys\_05\_2 6638 FTMS; HCD 85.54 579.26

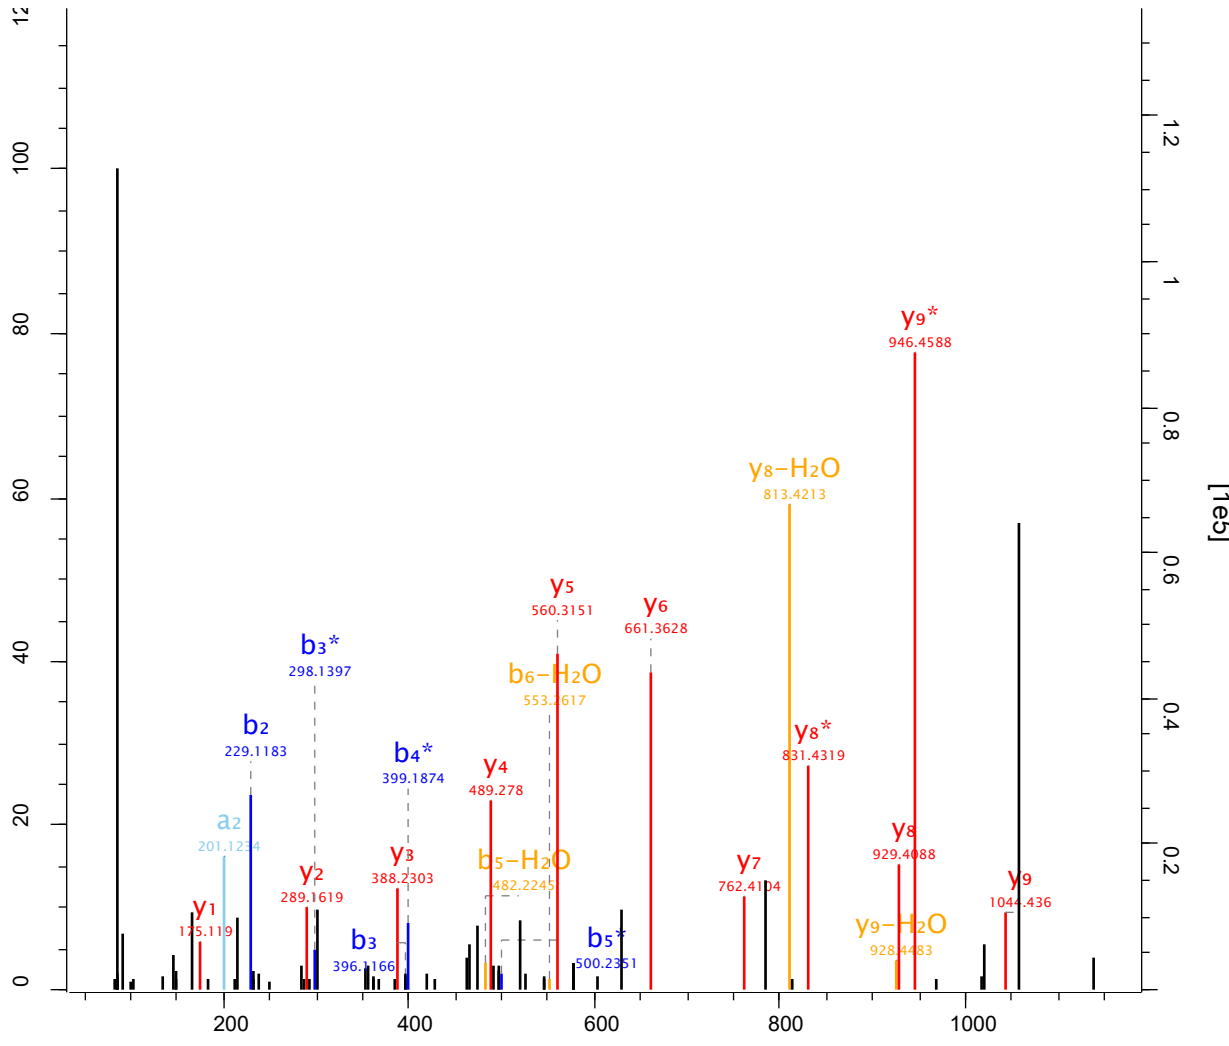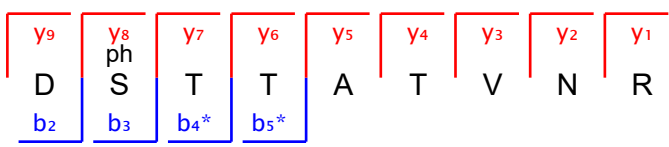

Raw file Scan Method Score m/z  
 sys\_05\_2 6780 FTMS; HCD 43.37 706.3

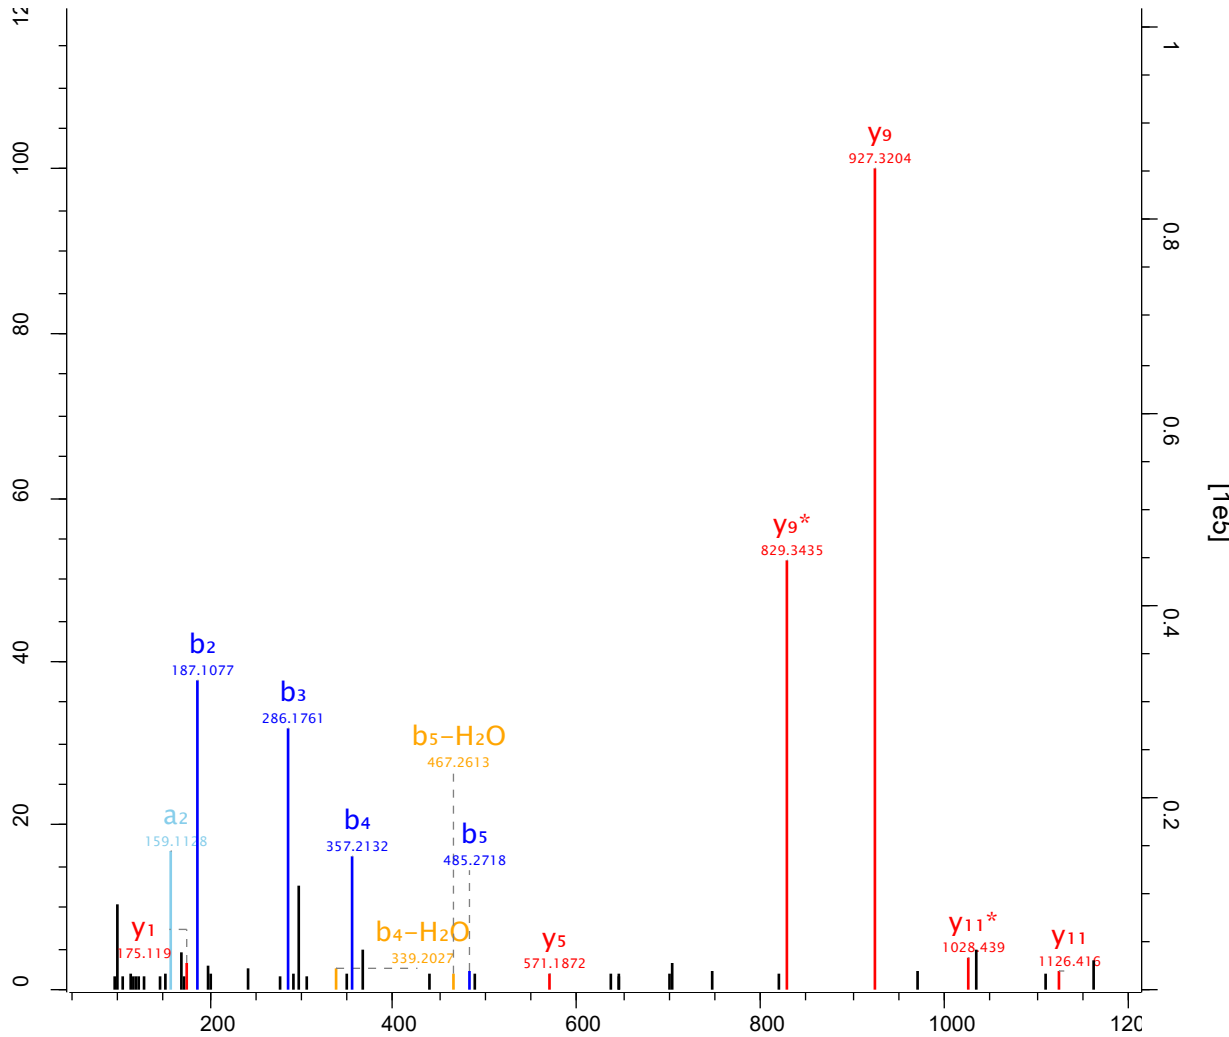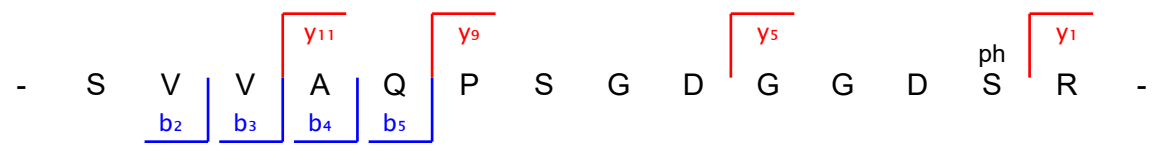

Raw file Scan Method Score m/z  
 sys\_05\_2 6827 FTMS; HCD 119.77 595.24

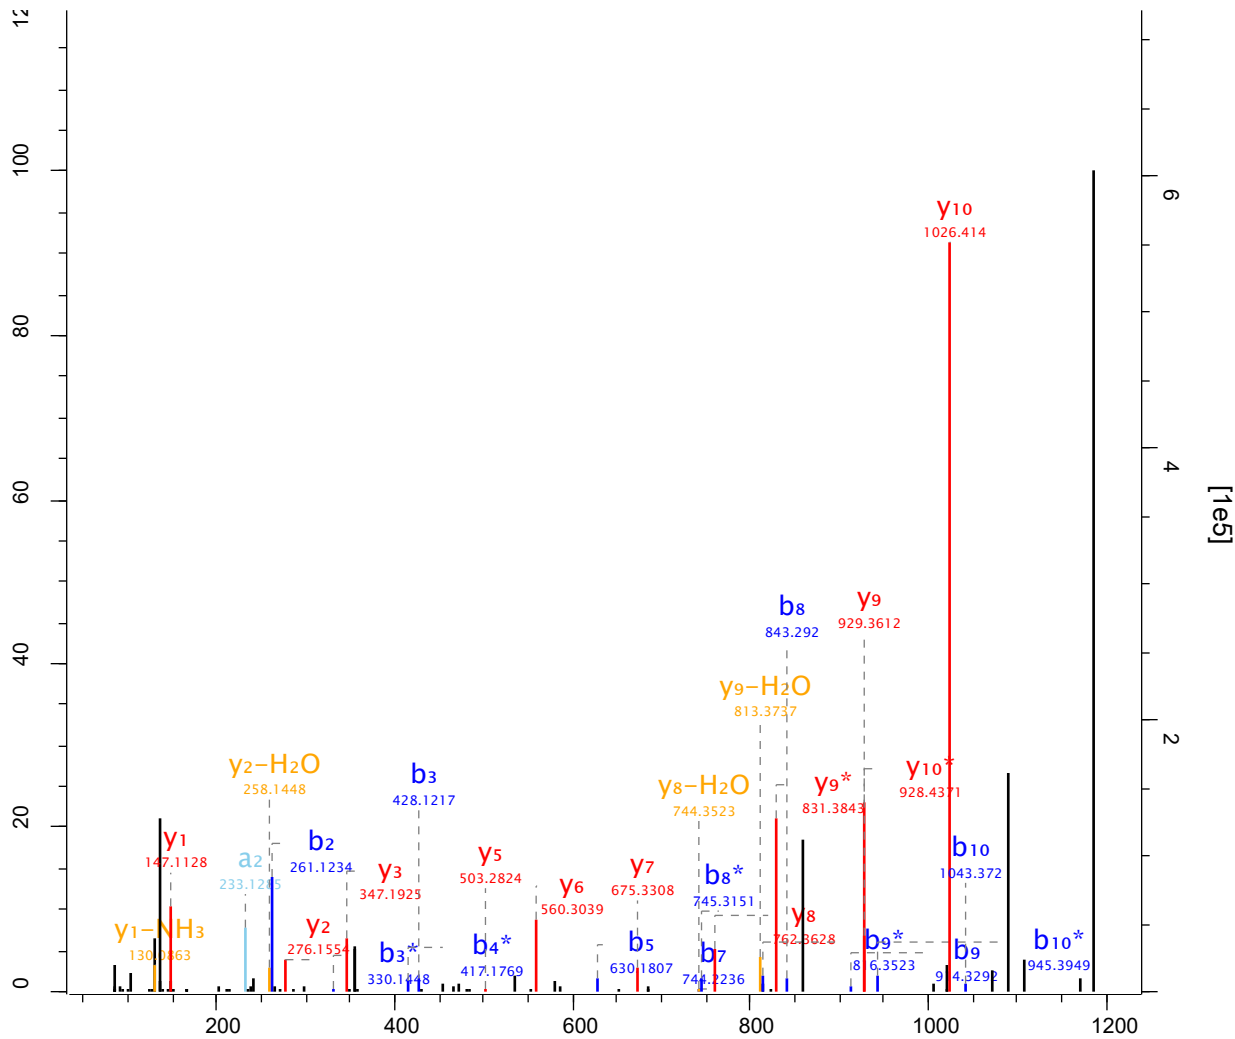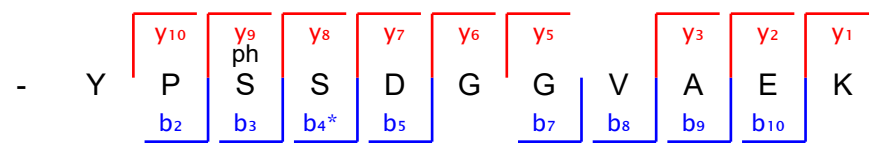



Raw file Scan Method Score m/z  
 sys\_05\_2 6918 FTMS; HCD 120.53 627.25

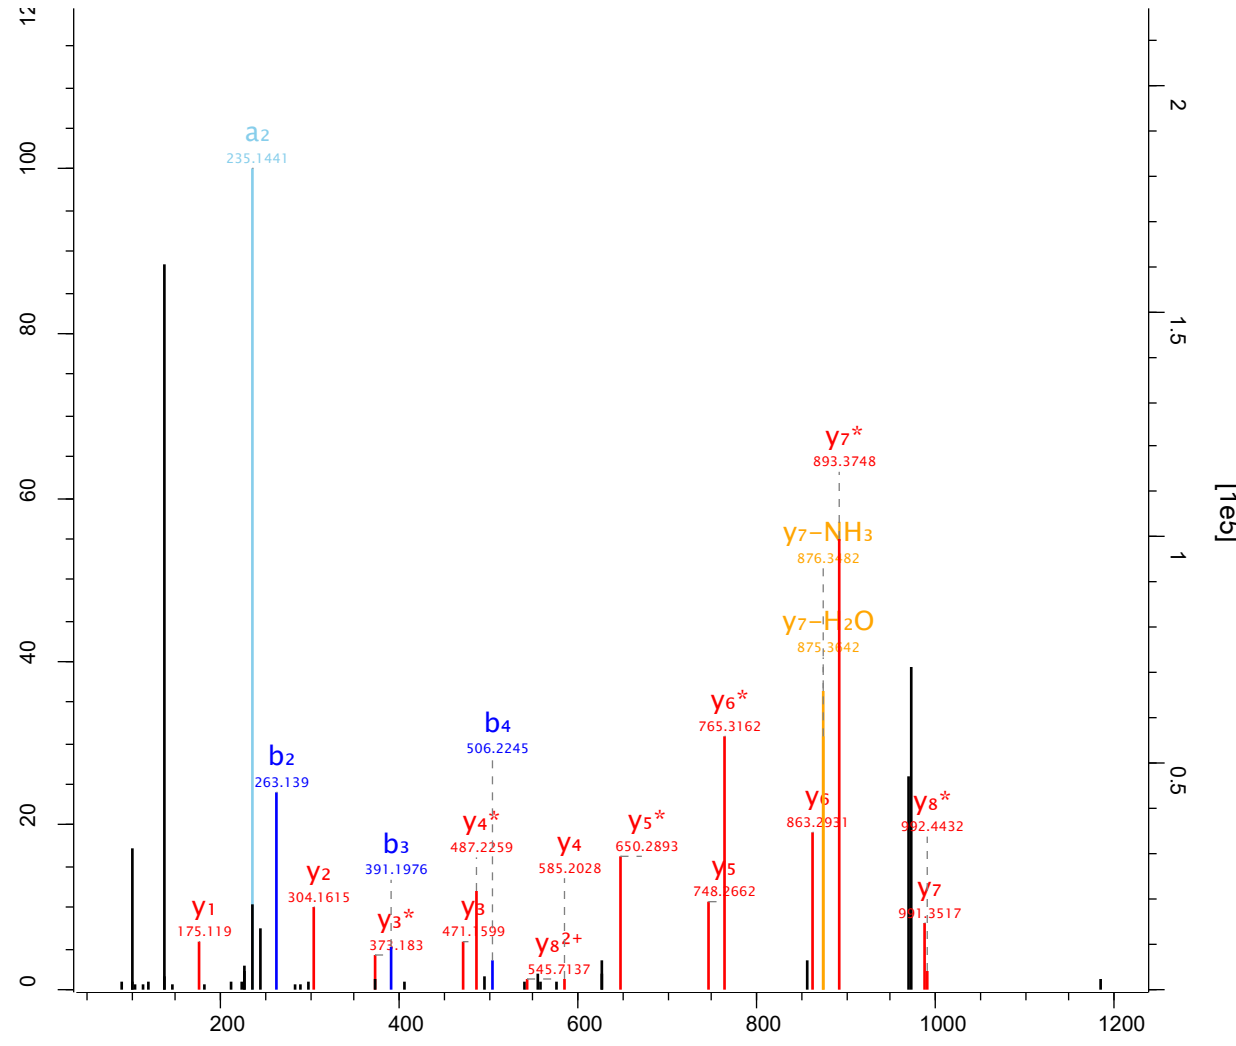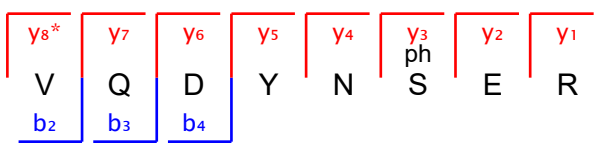

Raw file Scan Method Score m/z  
 sys\_05\_2 6972 FTMS; HCD 192.39 661.8

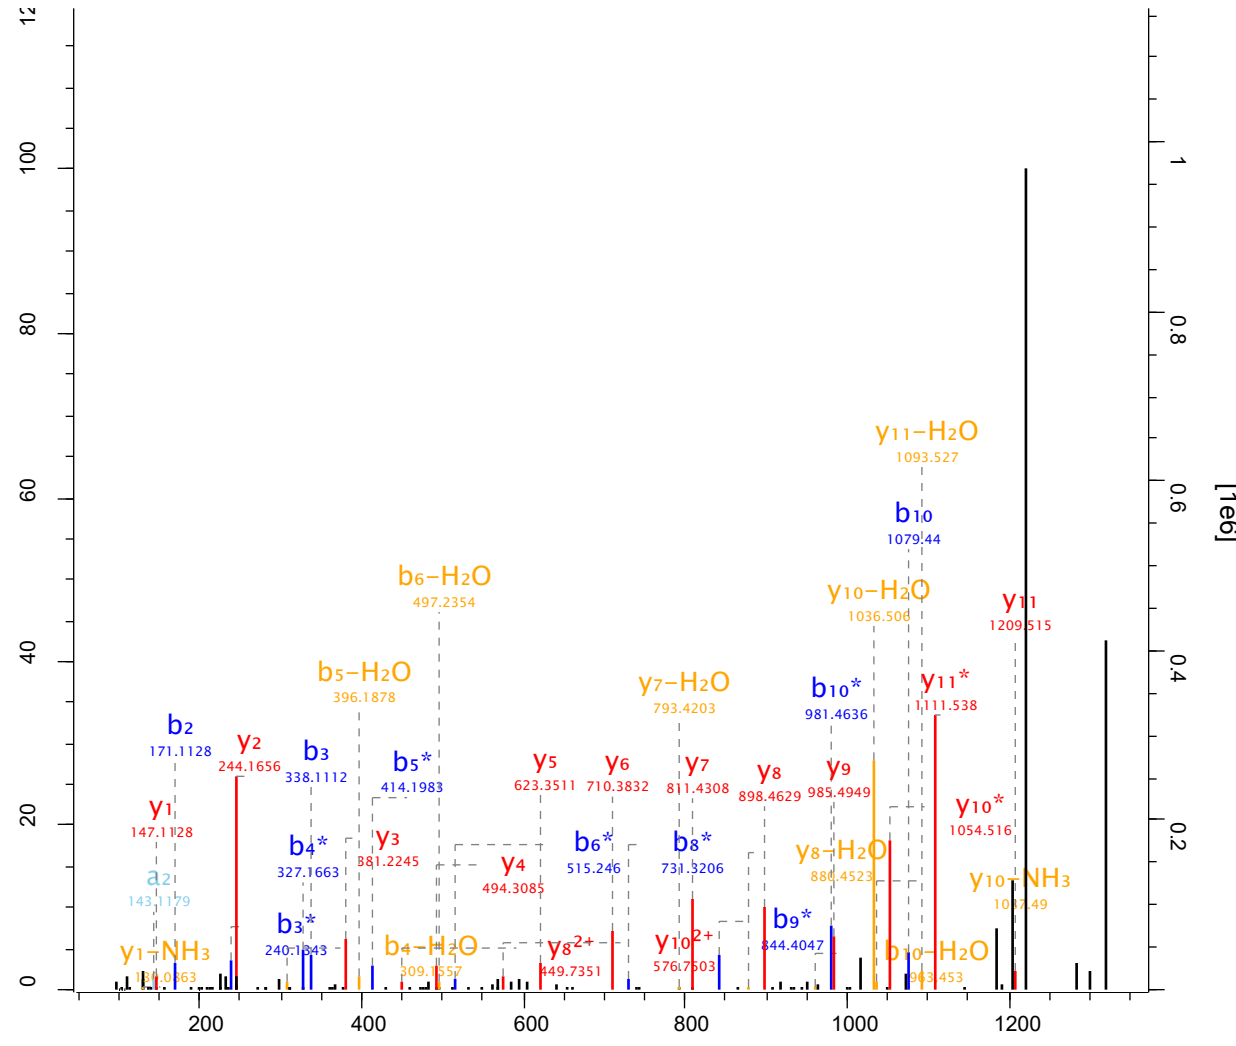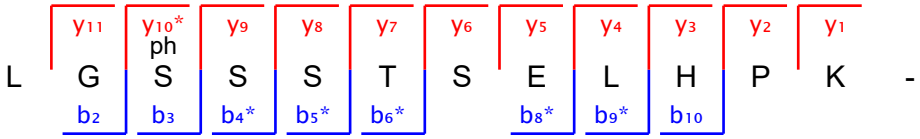

Raw file Scan Method Score m/z  
 sys\_05\_2 7017 FTMS; HCD 84.51 476.71

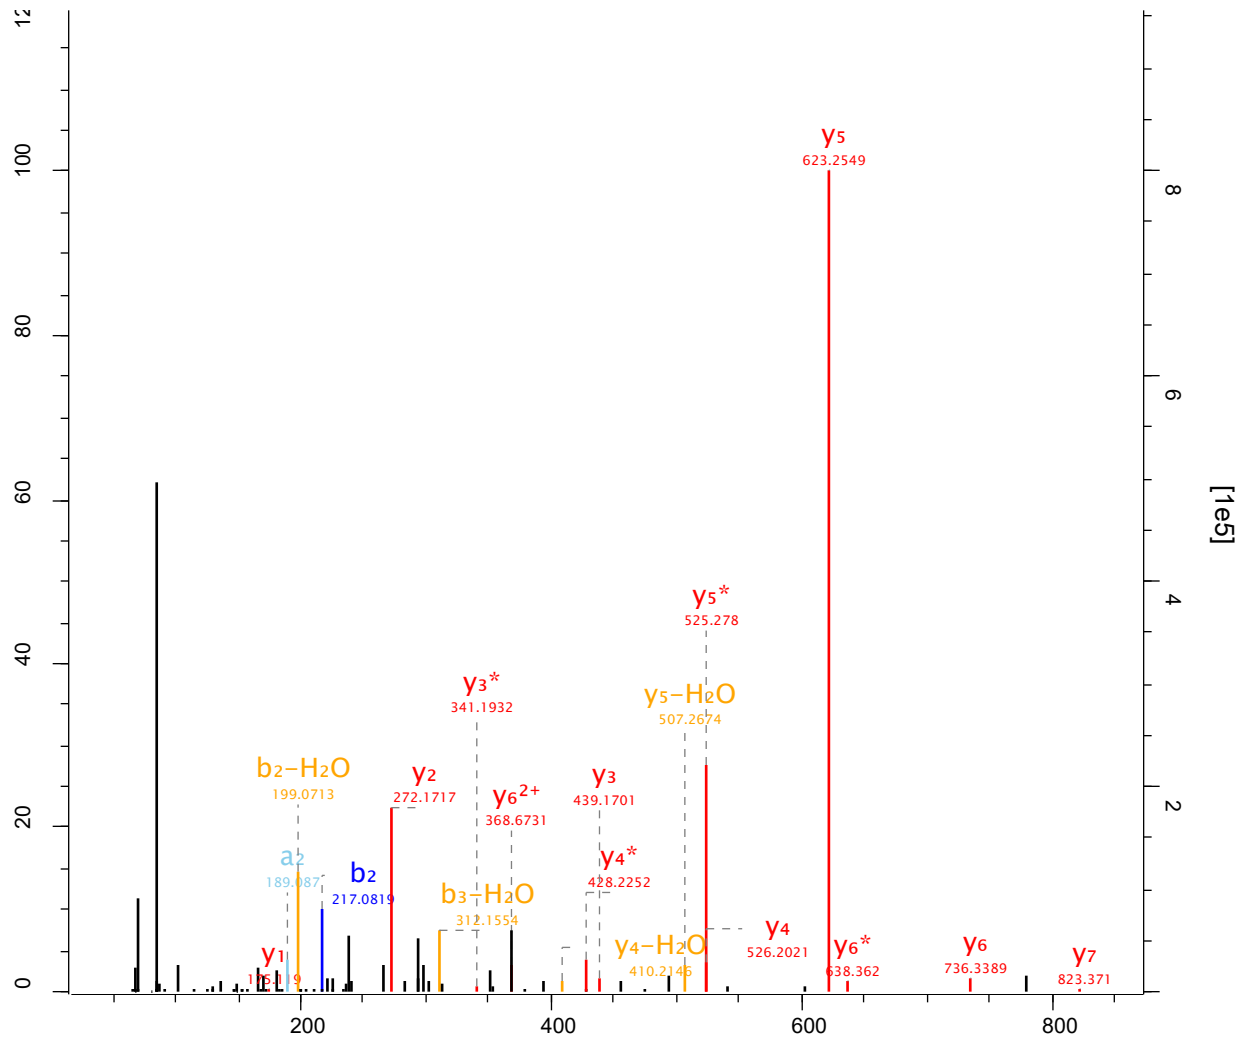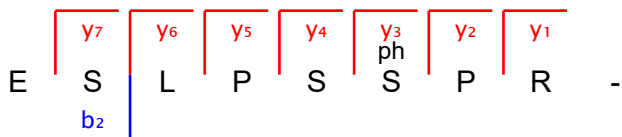

Raw file Scan Method Score m/z  
 sys\_05\_2 7133 FTMS; HCD 129.53 566.73

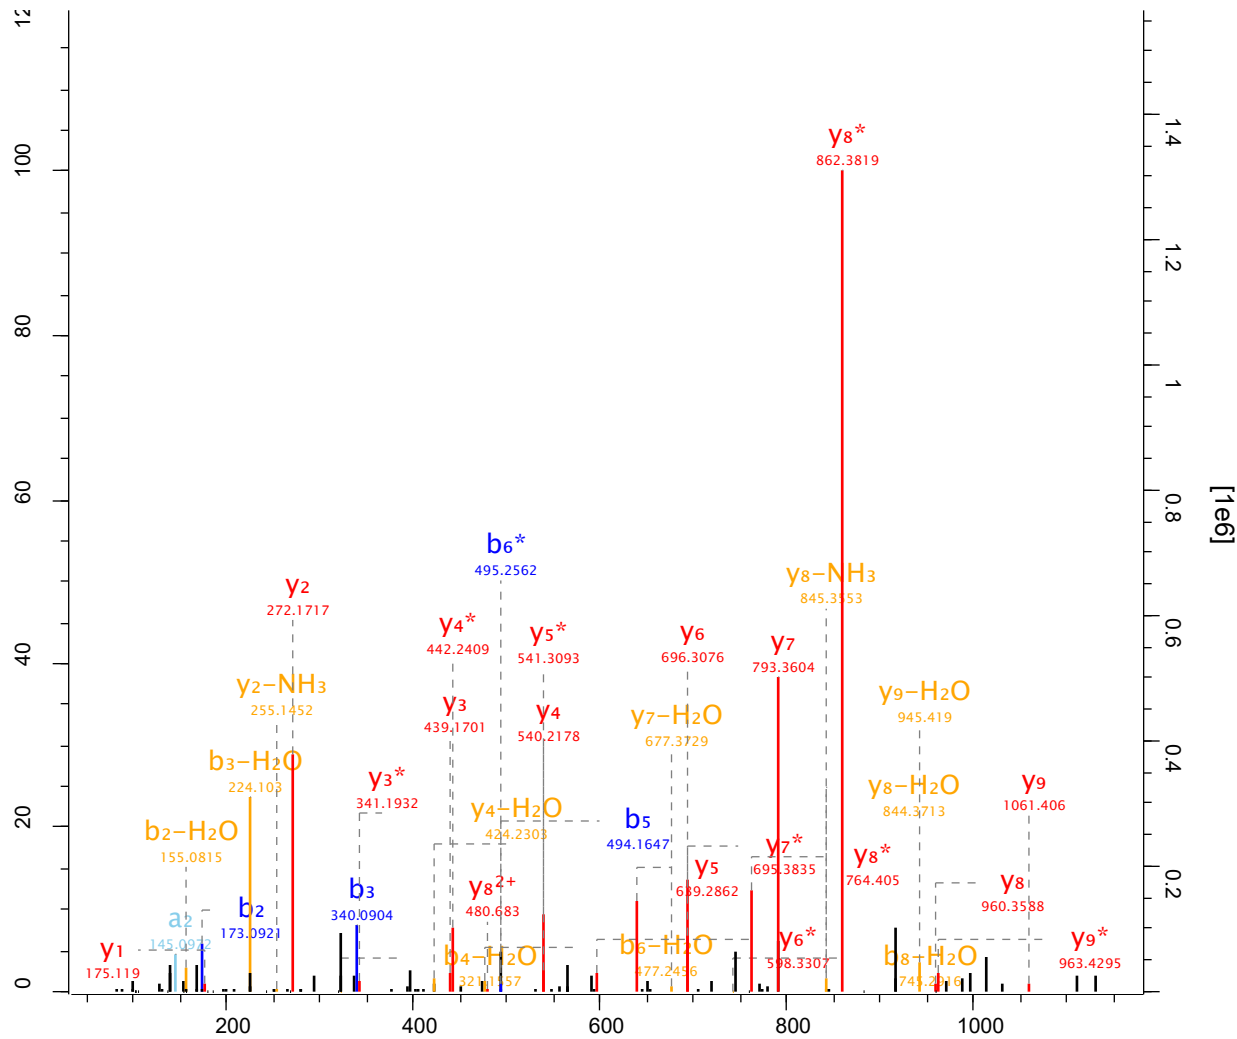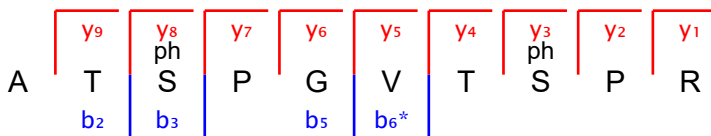

Raw file Scan Method Score m/z  
 sys\_05\_2 7161 FTMS; HCD 92.01 762.65

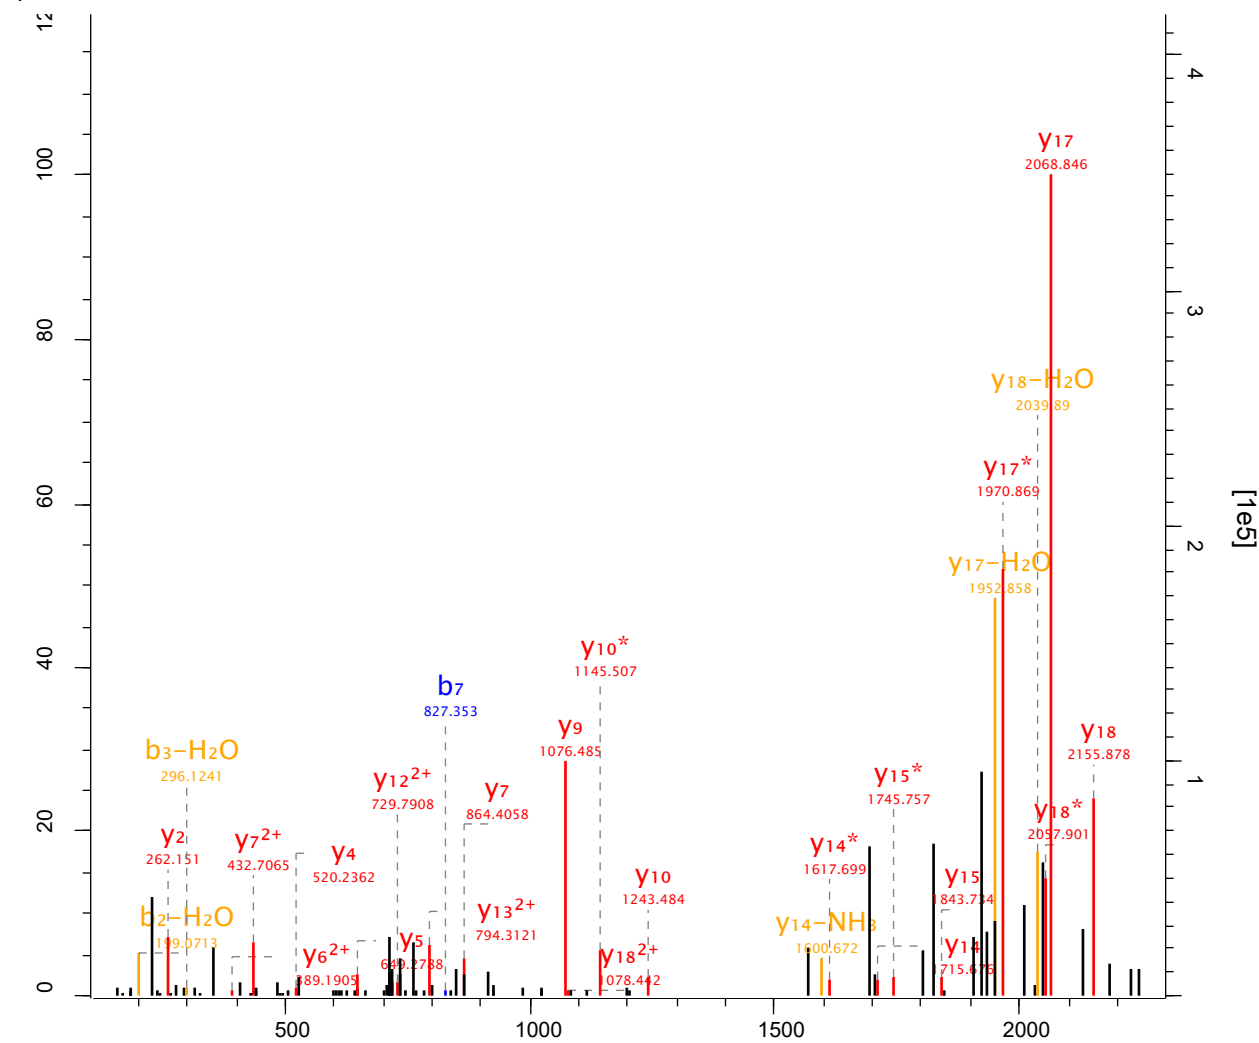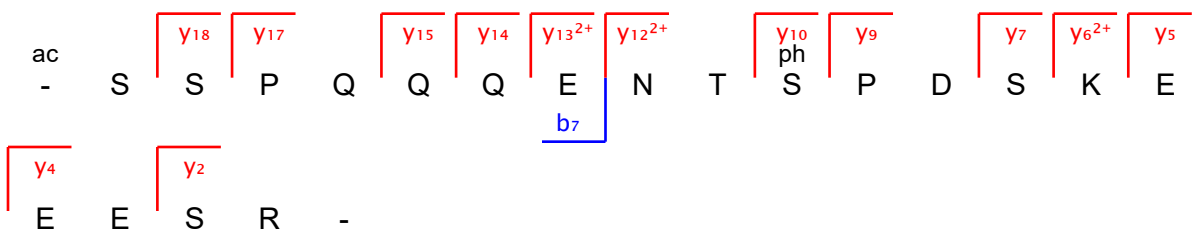

Raw file Scan Method Score m/z  
 sys\_05\_2 7209 FTMS; HCD 56.57 646.8

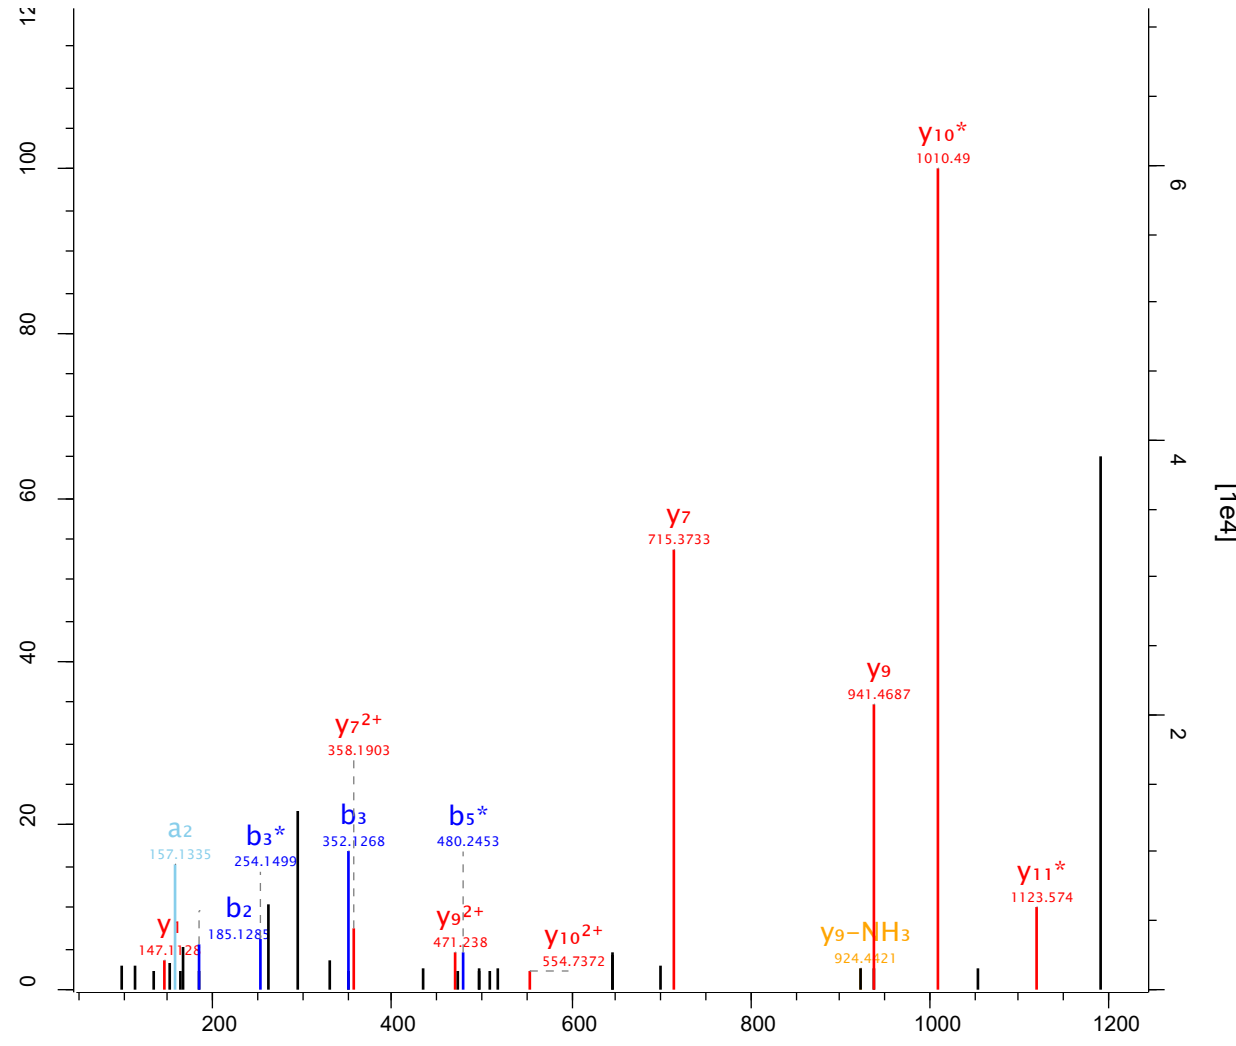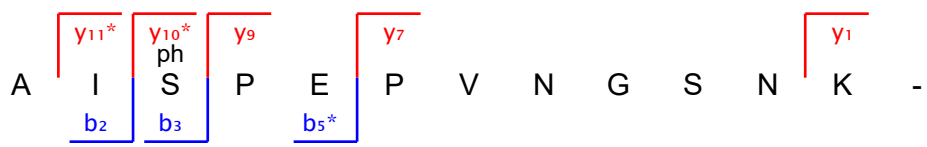

Raw file Scan Method Score m/z  
 sys\_05\_2 7267 FTMS; HCD 90.83 576.79

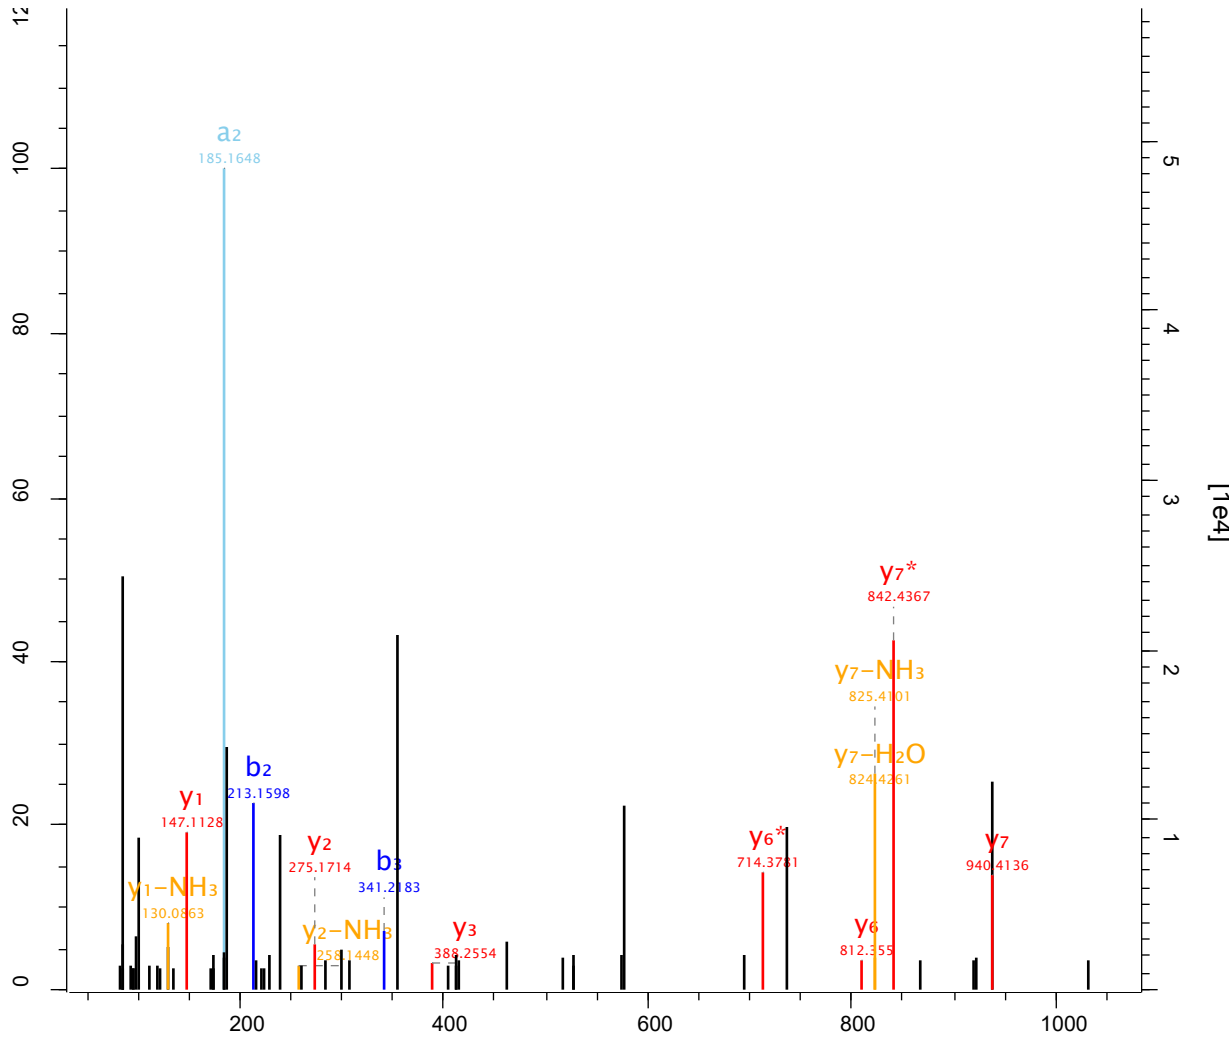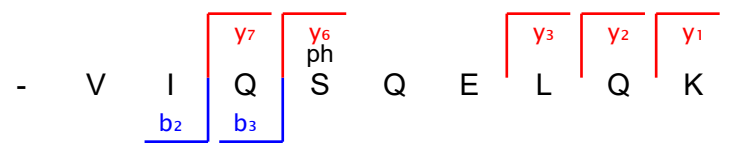

Raw file Scan Method Score m/z  
 sys\_05\_2 7308 FTMS; HCD 93.37 839.83

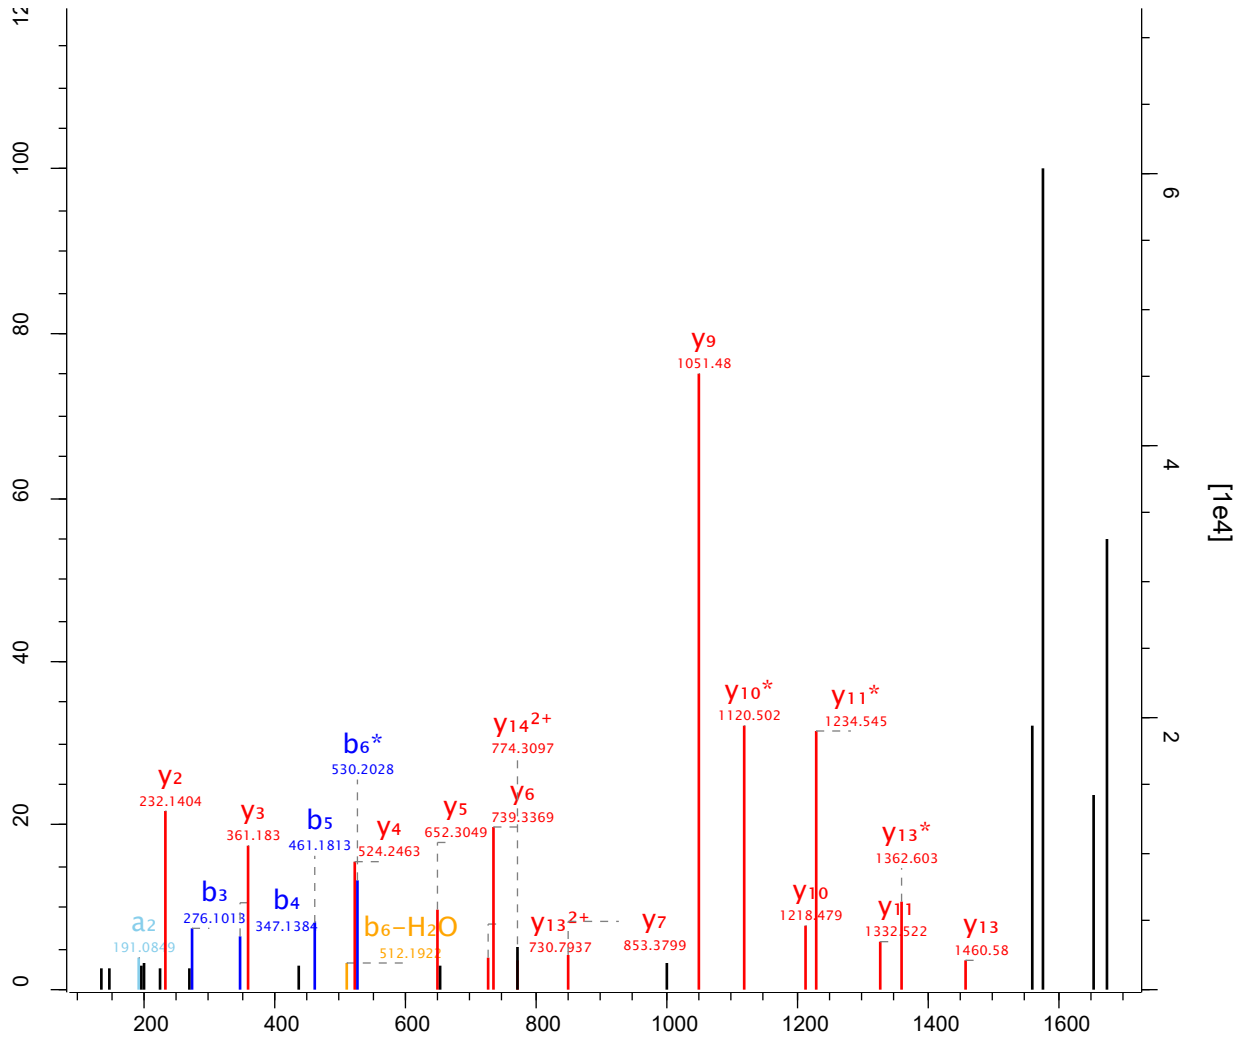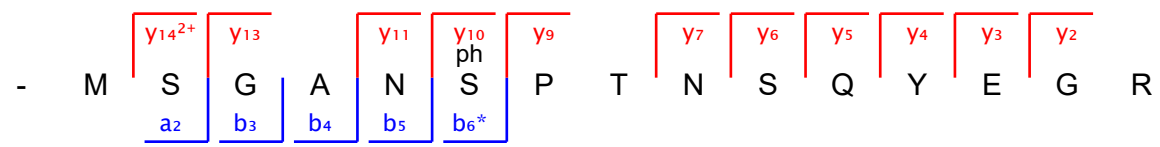



Raw file Scan Method Score m/z  
 sys\_05\_2 7373 FTMS; HCD 116.37 412.22

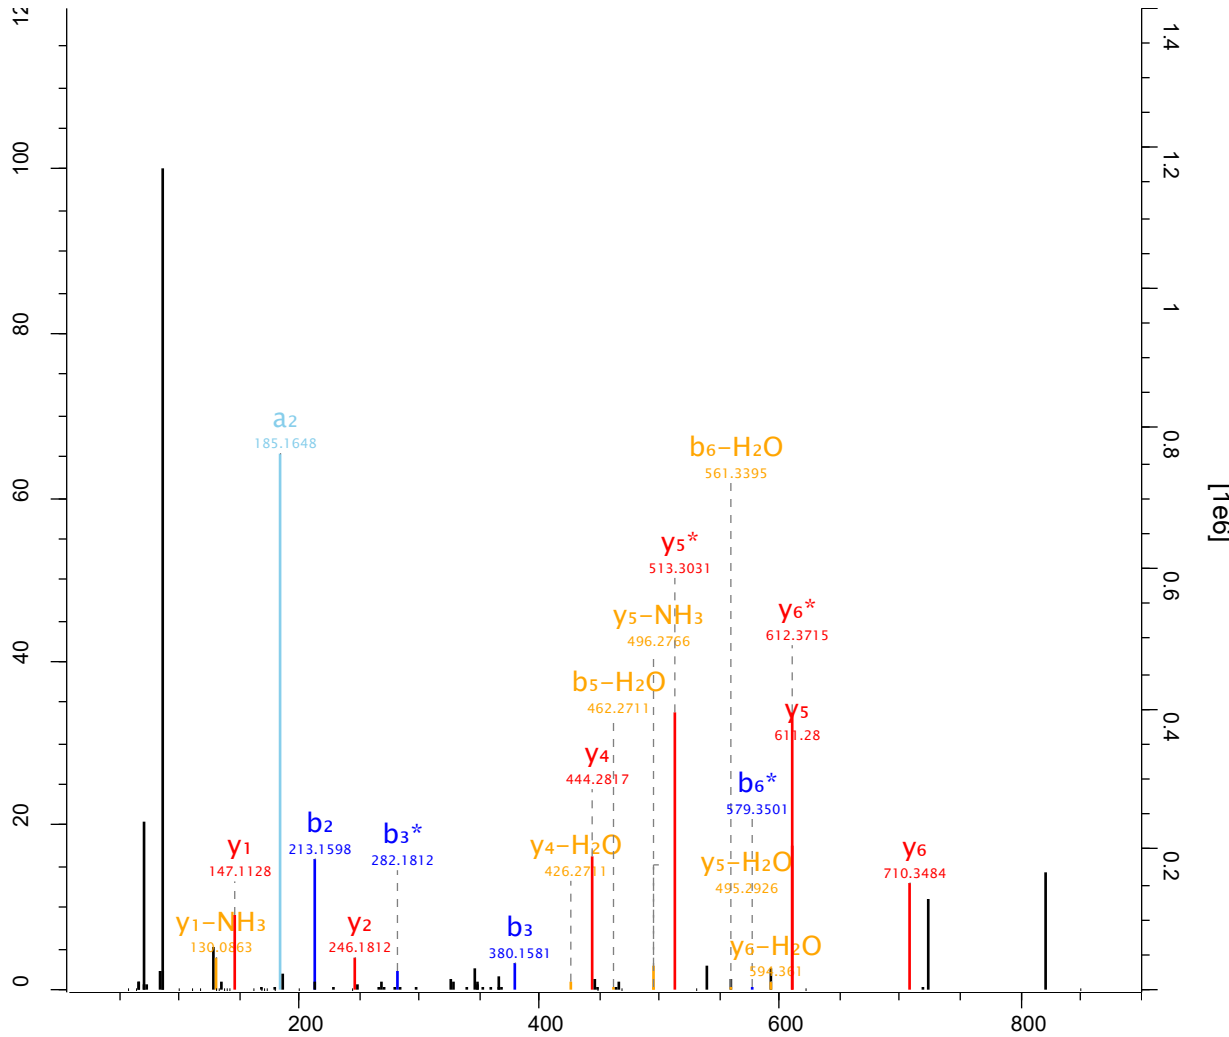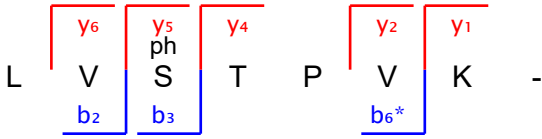

Raw file Scan Method Score m/z  
 sys\_05\_2 7474 FTMS; HCD 280.5 663.27

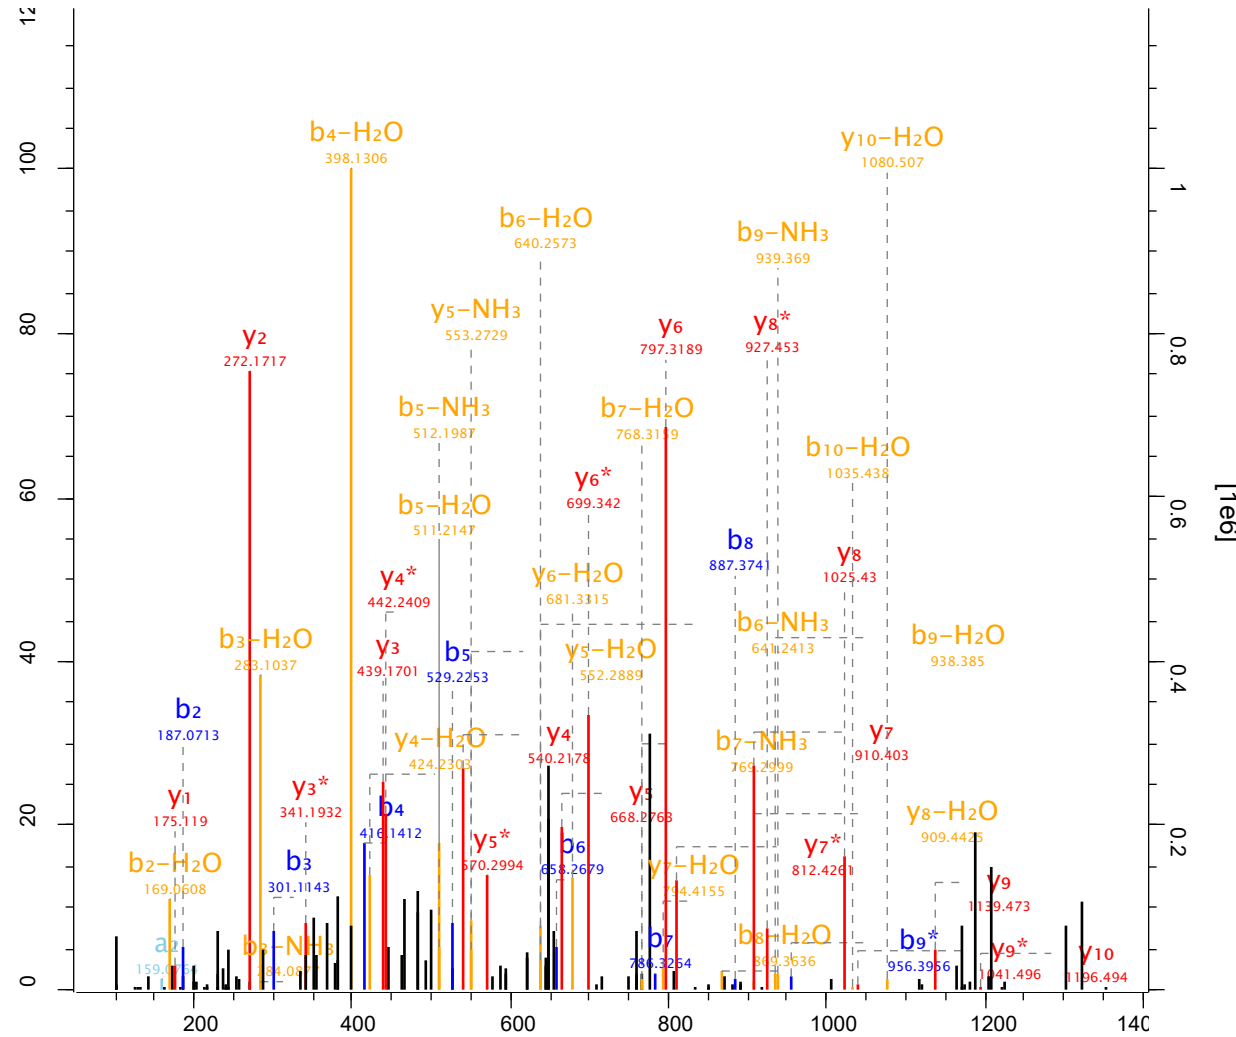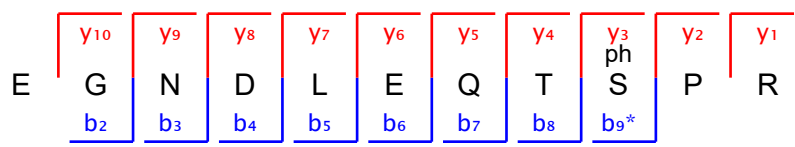

Raw file Scan Method Score m/z  
 sys\_05\_2 7489 FTMS; HCD 69.23 591.26

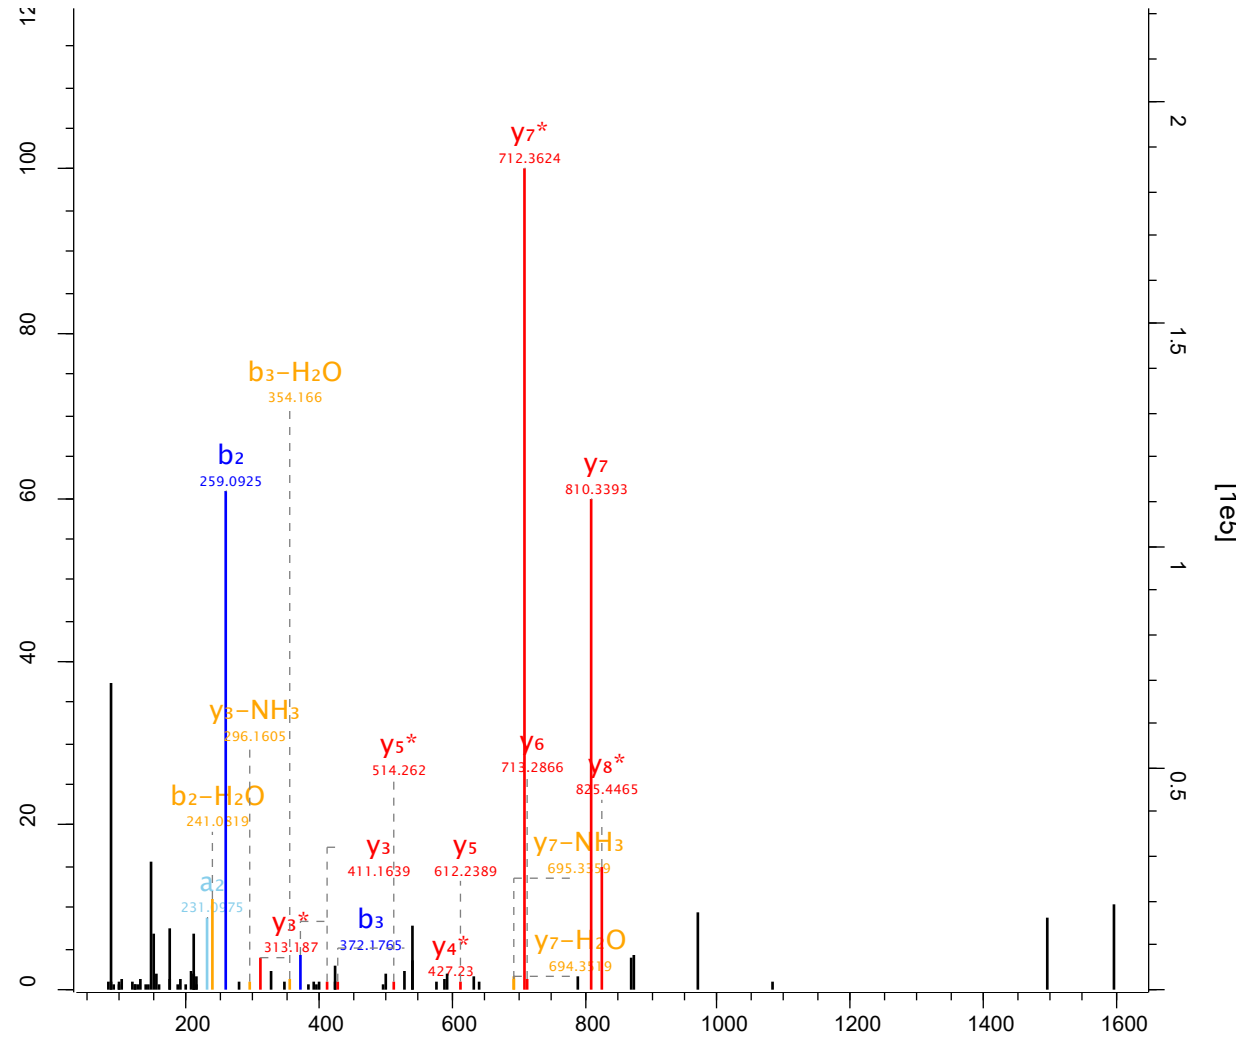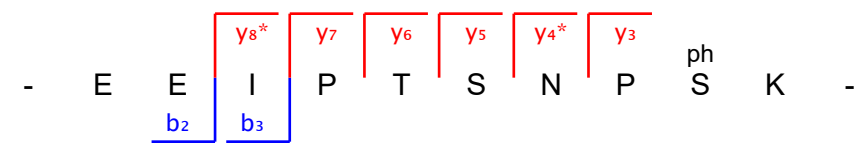

Raw file Scan Method Score m/z  
 sys\_05\_2 7502 FTMS; HCD 82.07 558.74

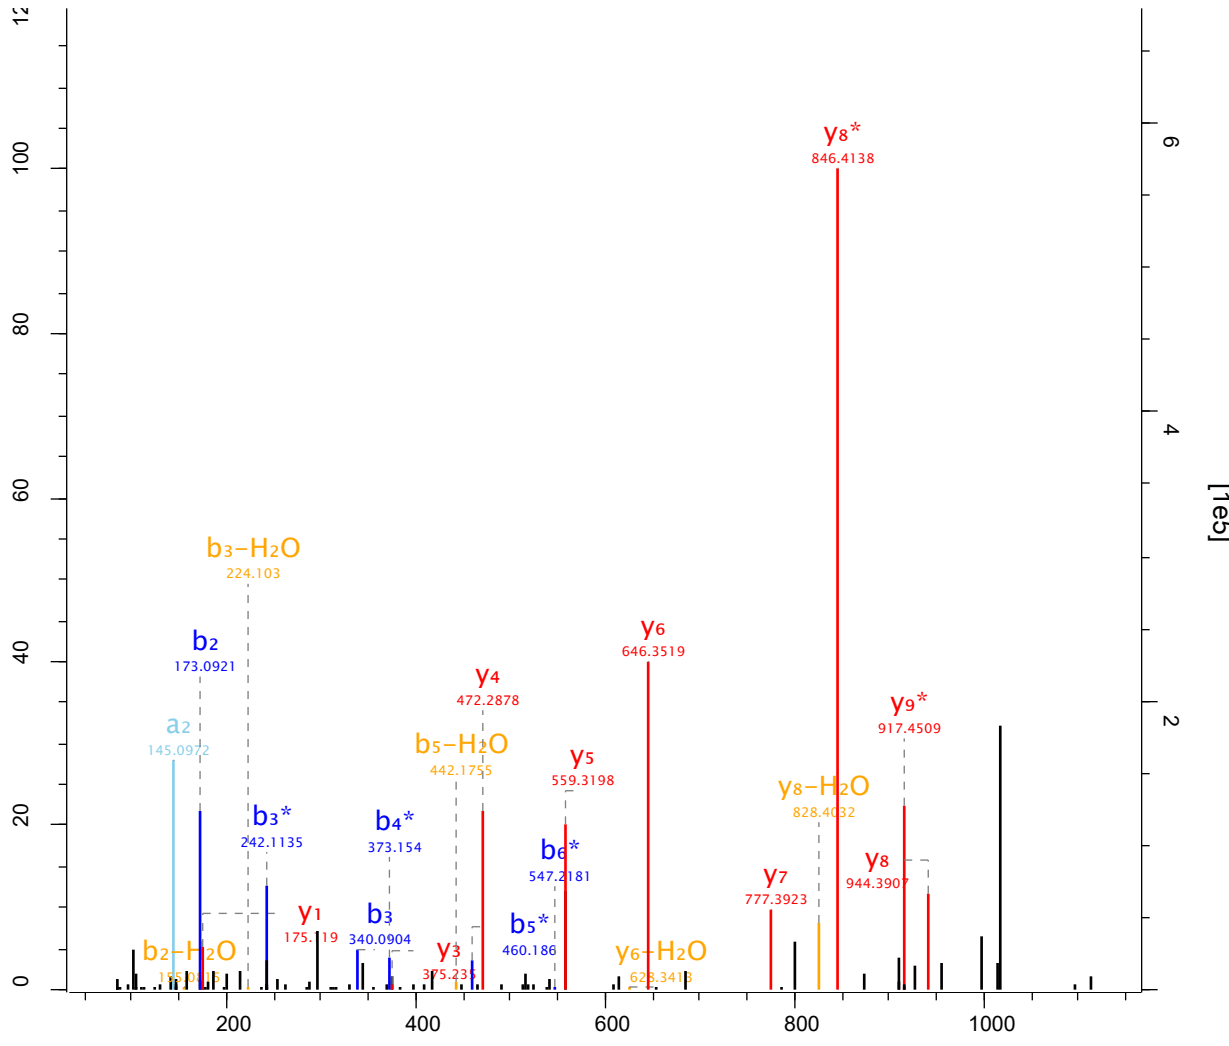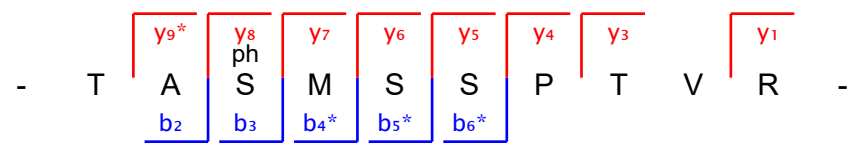

Raw file Scan Method Score m/z  
 sys\_05\_2 7587 FTMS; HCD 109.1 573.75

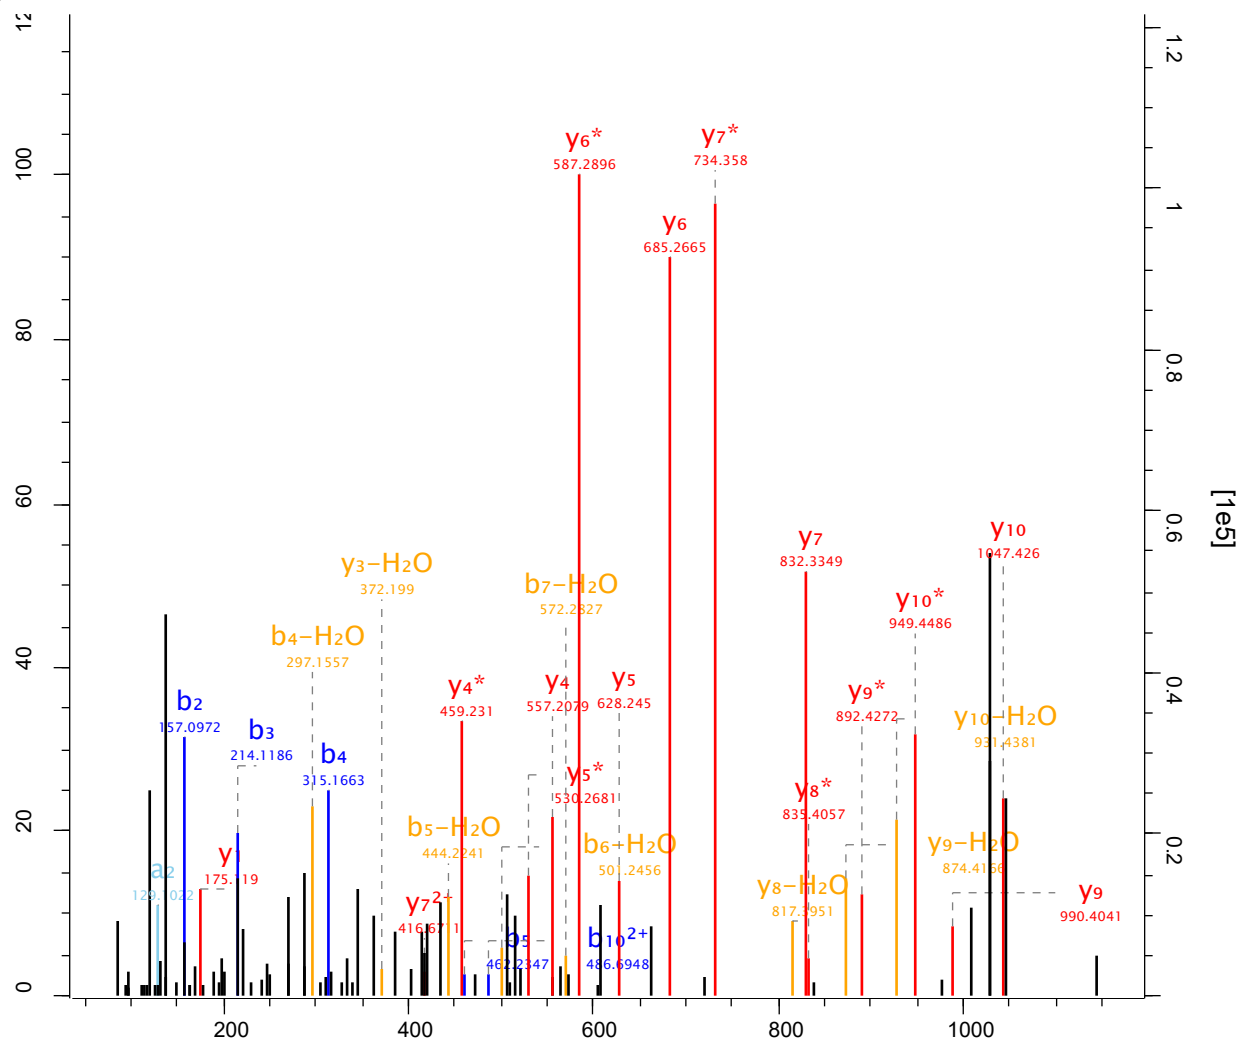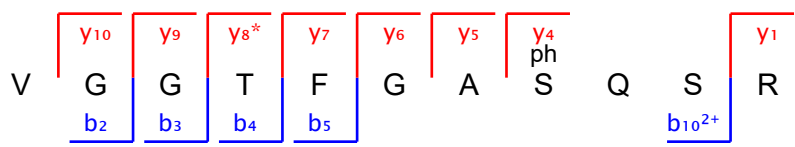

Raw file Scan Method Score m/z  
 sys\_05\_2 7605 FTMS; HCD 123.19 627.24

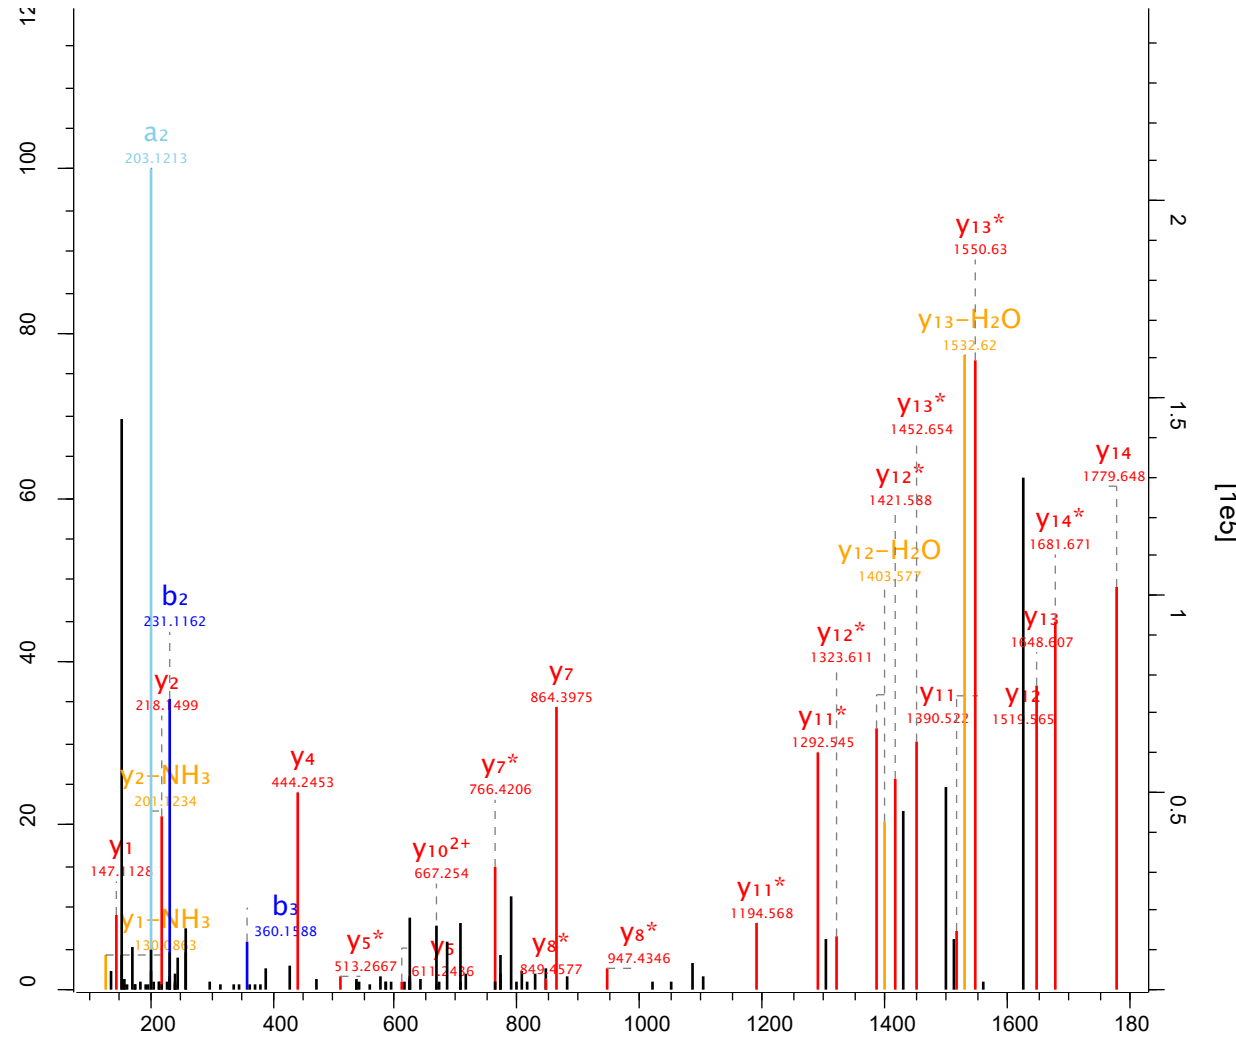

- V M E E G C Q T P R S P E A K  
 - b2 b3 y14 y13 y12 y11 y10<sup>2+</sup> y8\* y7 y5 ph y4 y2 y1

Raw file Scan Method Score m/z  
 sys\_05\_2 7753 FTMS; HCD 228.38 557.56

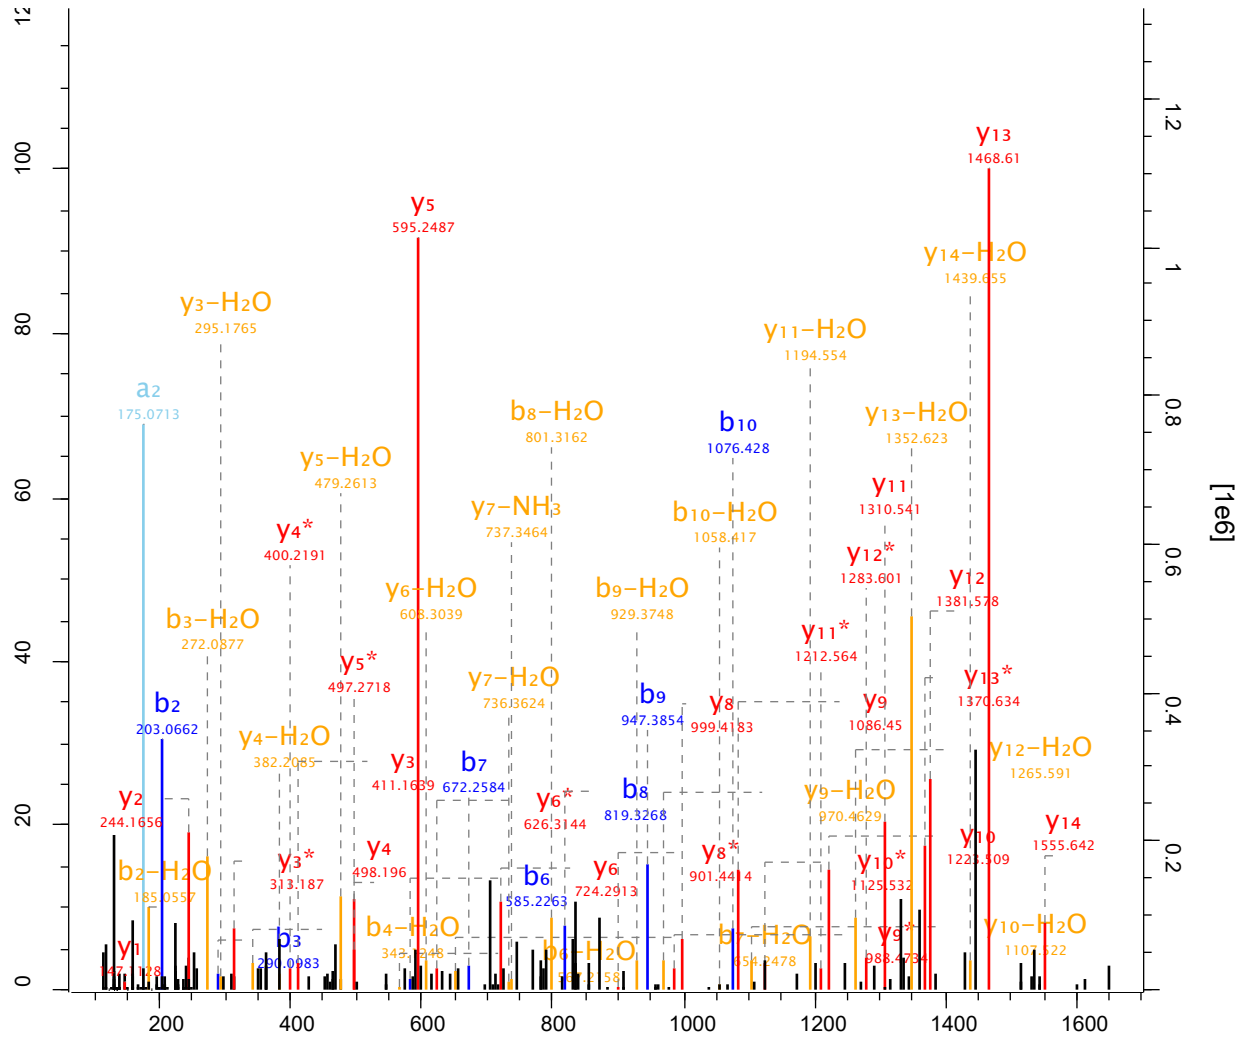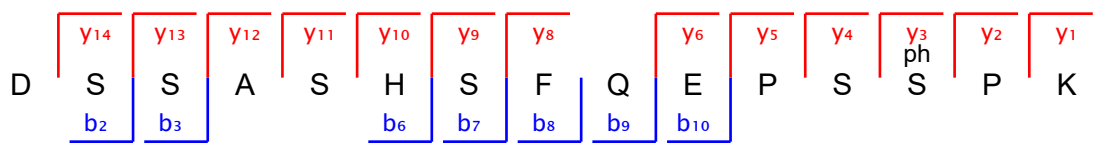

Raw file Scan Method Score m/z  
 sys\_05\_2 7769 FTMS; HCD 66.02 526.74

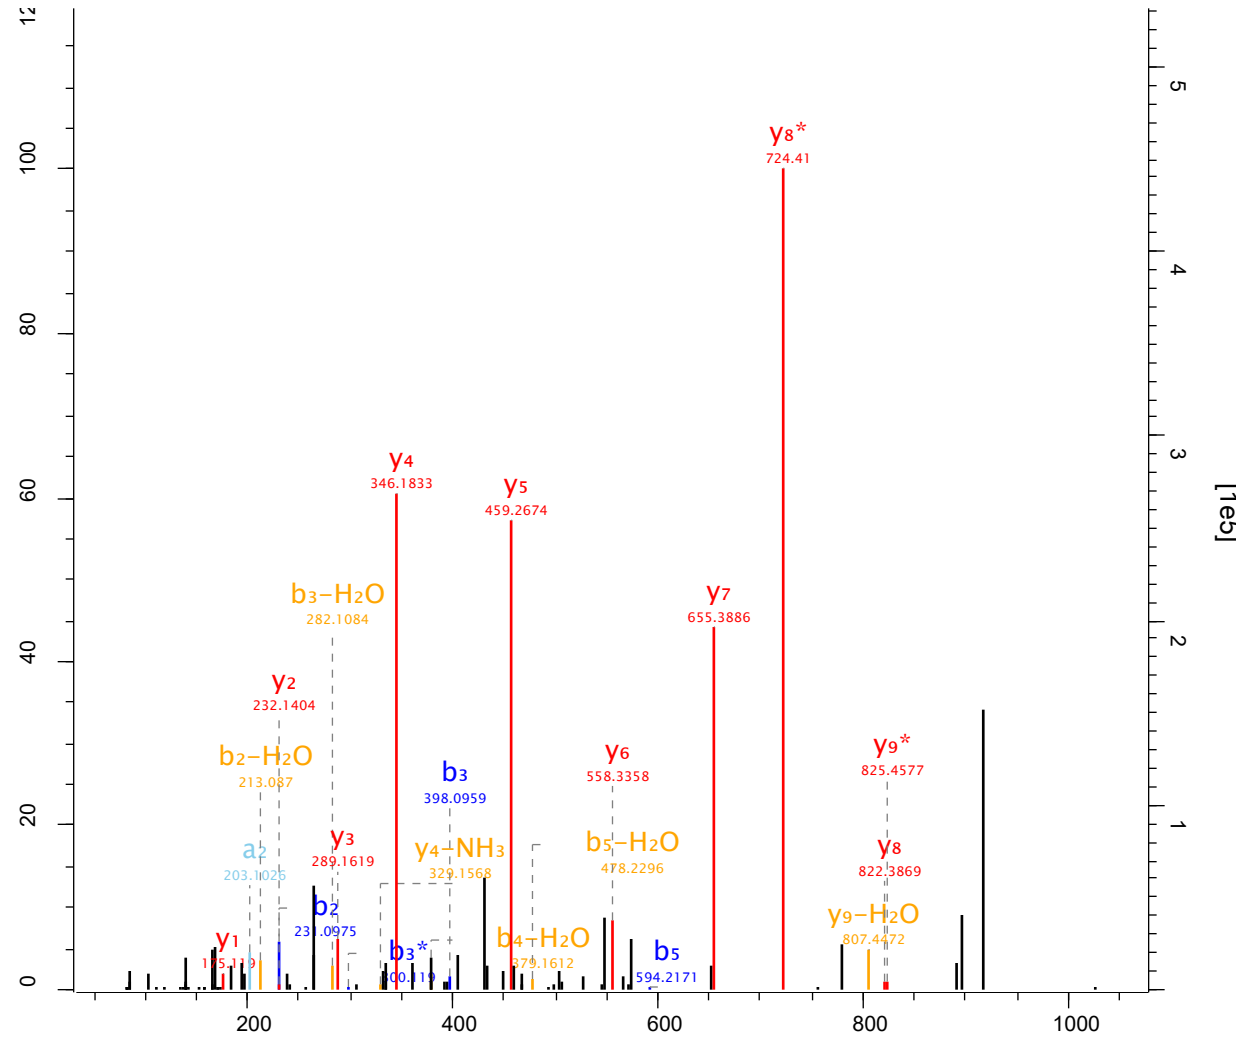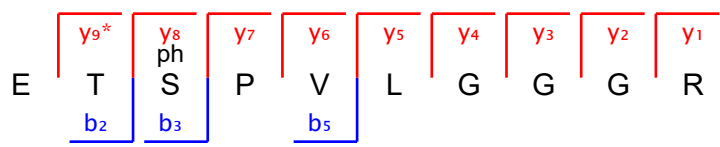



Raw file Scan Method Score m/z  
 sys\_05\_2 7897 FTMS; HCD 97.16 390.52

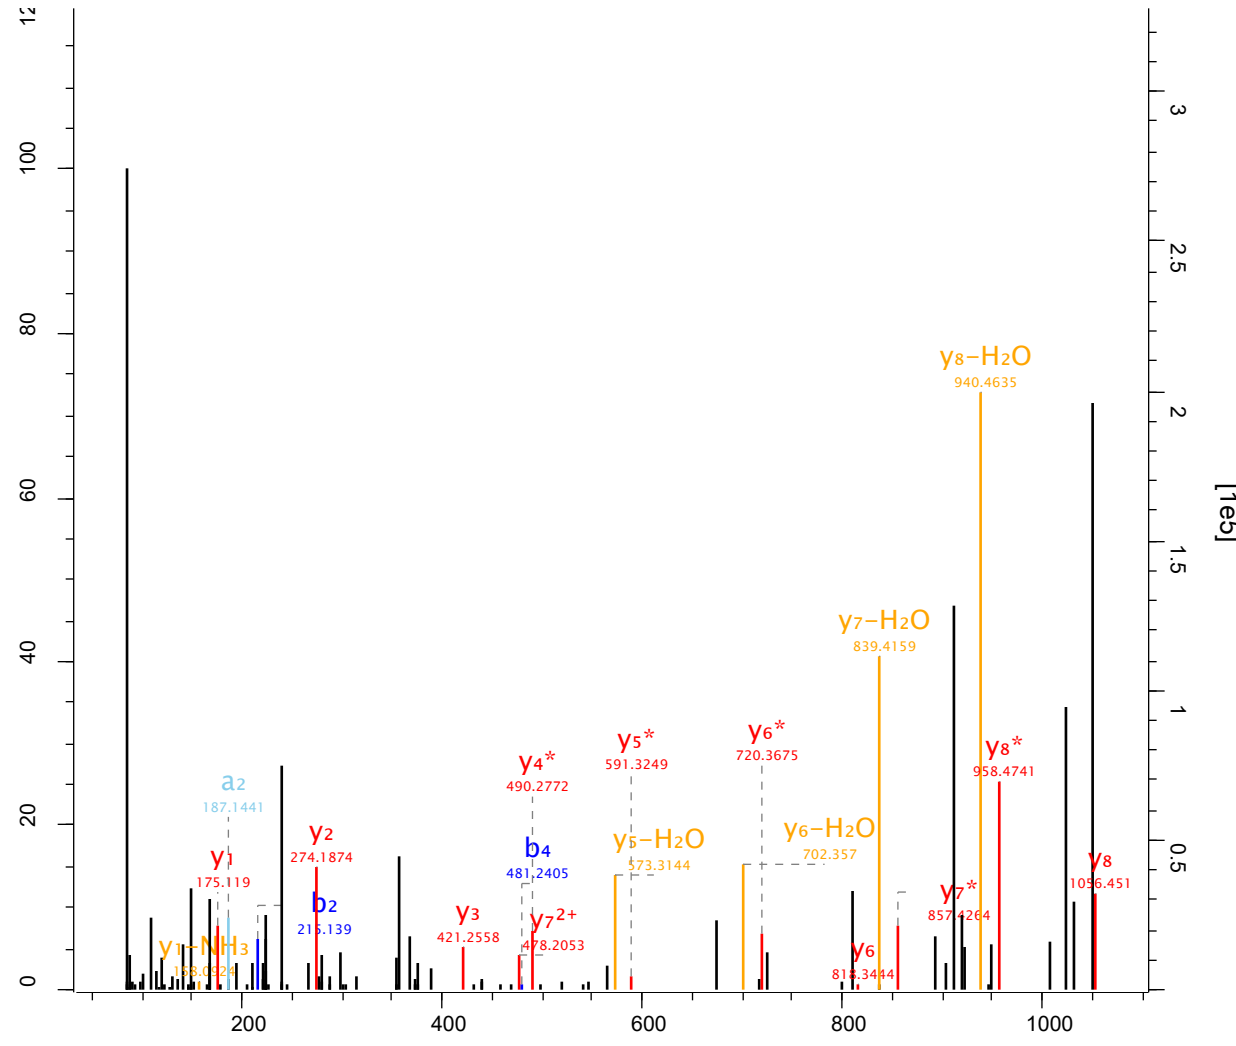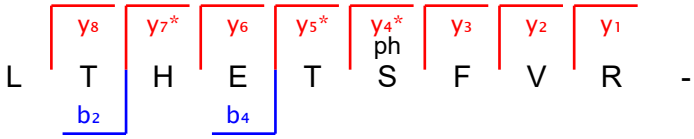

Raw file Scan Method Score m/z  
 sys\_05\_2 8021 FTMS; HCD 46.32 440.55

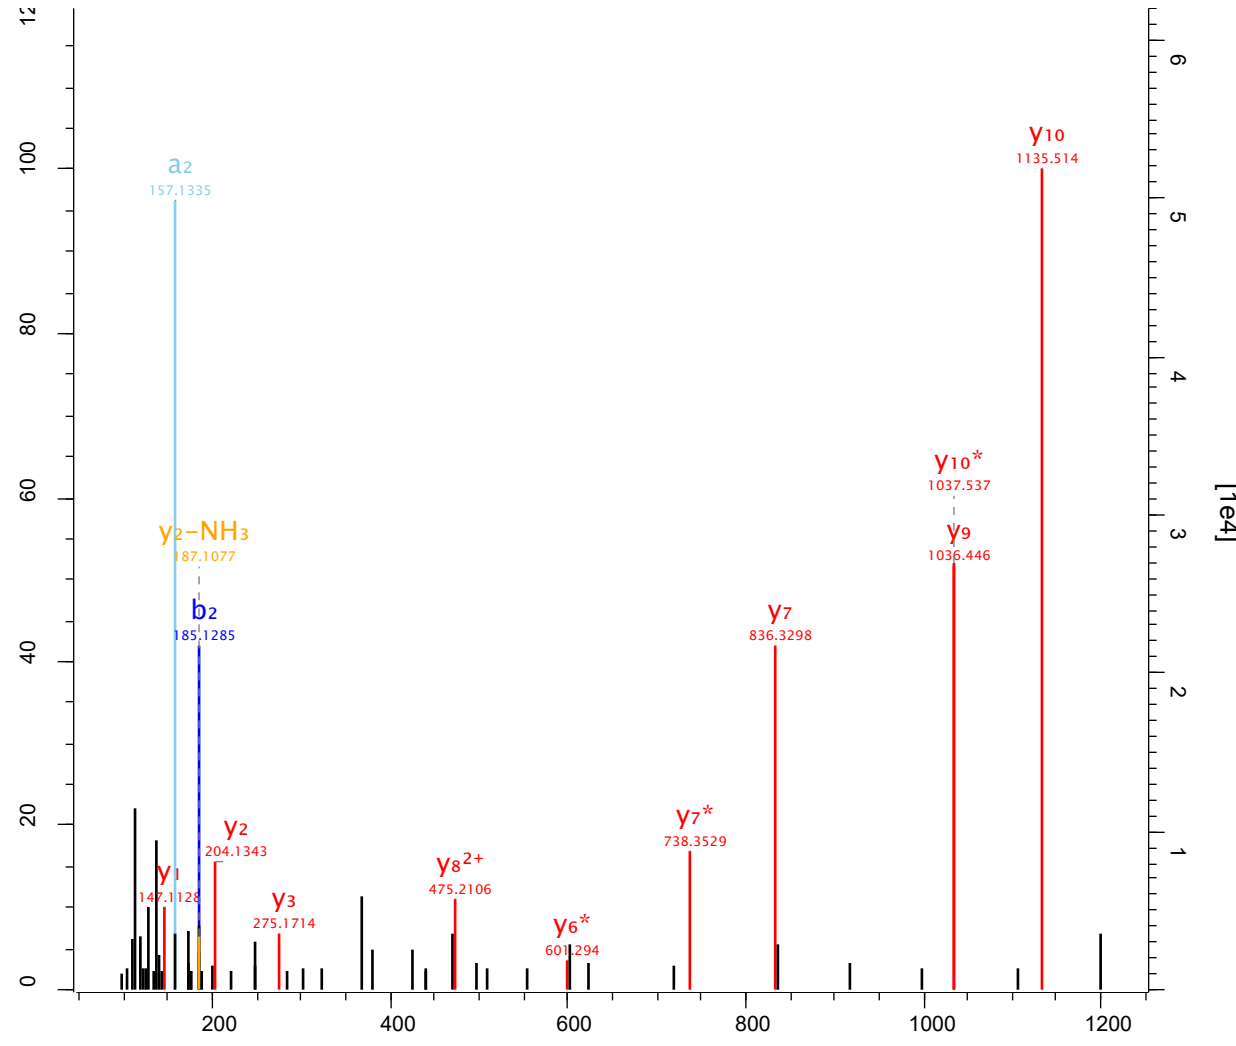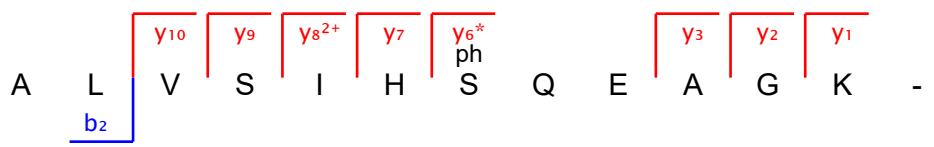

Raw file Scan Method Score m/z  
 sys\_05\_2 8192 FTMS; HCD 194.19 726.79

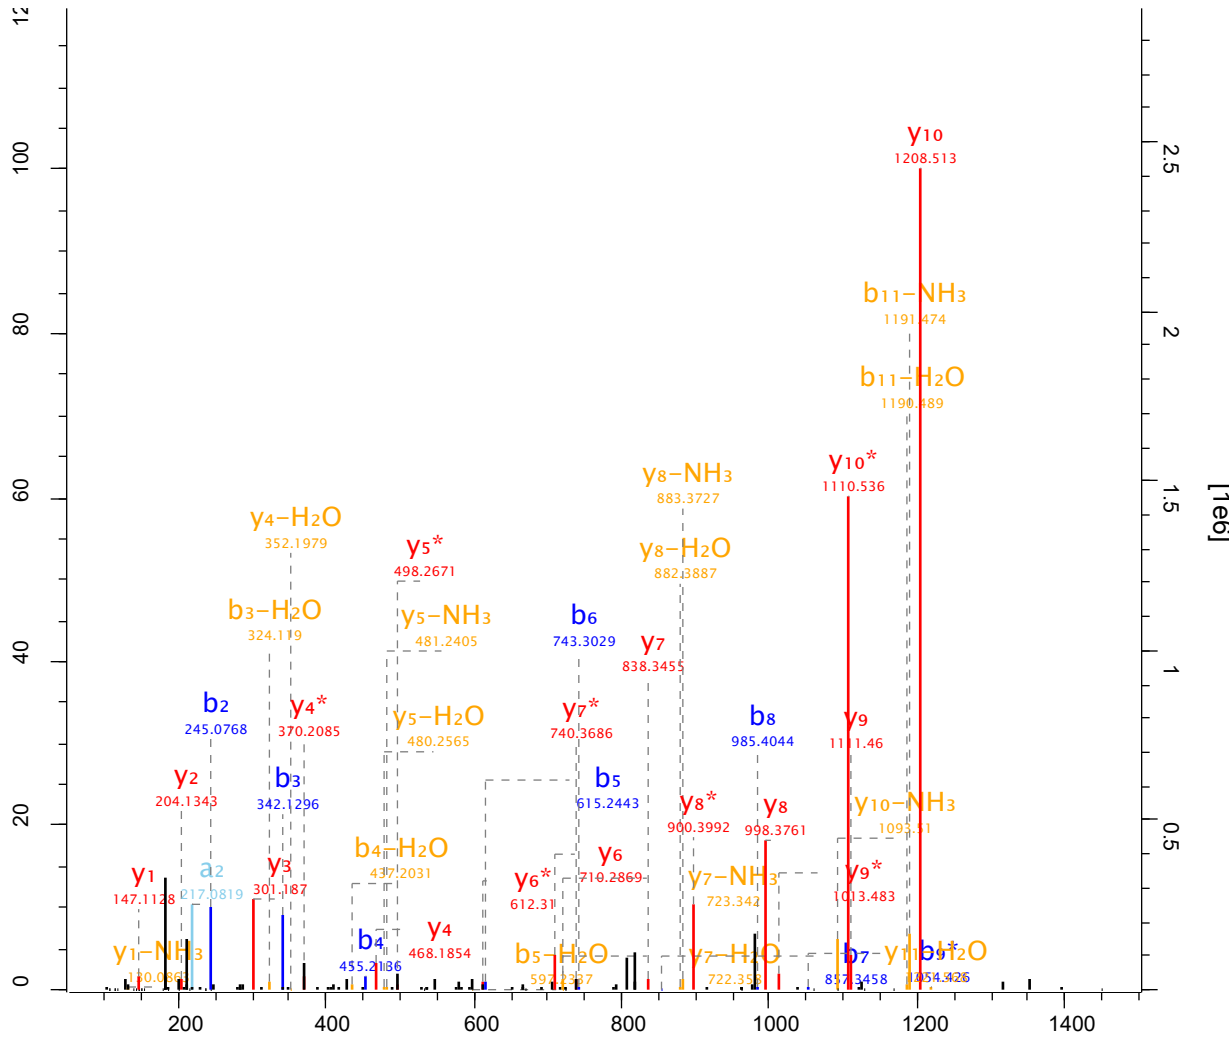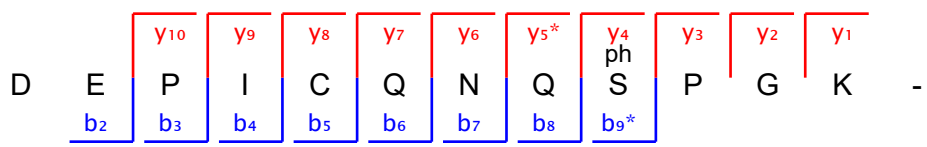

Raw file Scan Method Score m/z  
 sys\_05\_2 8483 FTMS; HCD 90.56 678.77

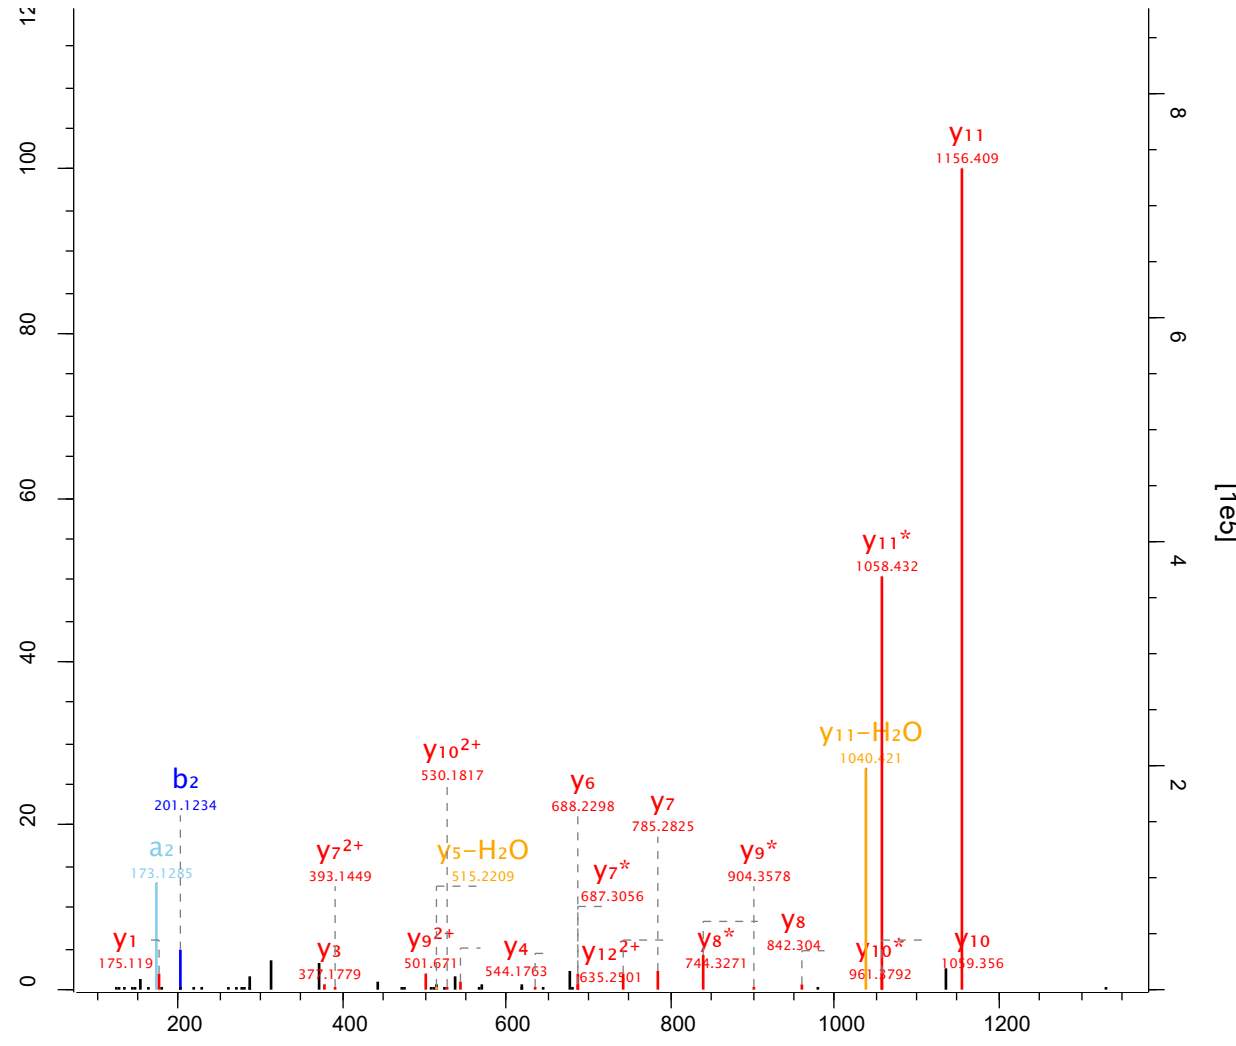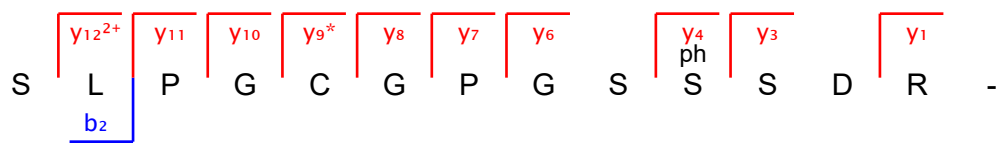

Raw file Scan Method Score m/z  
 sys\_05\_2 8666 FTMS; HCD 103.88 640.29

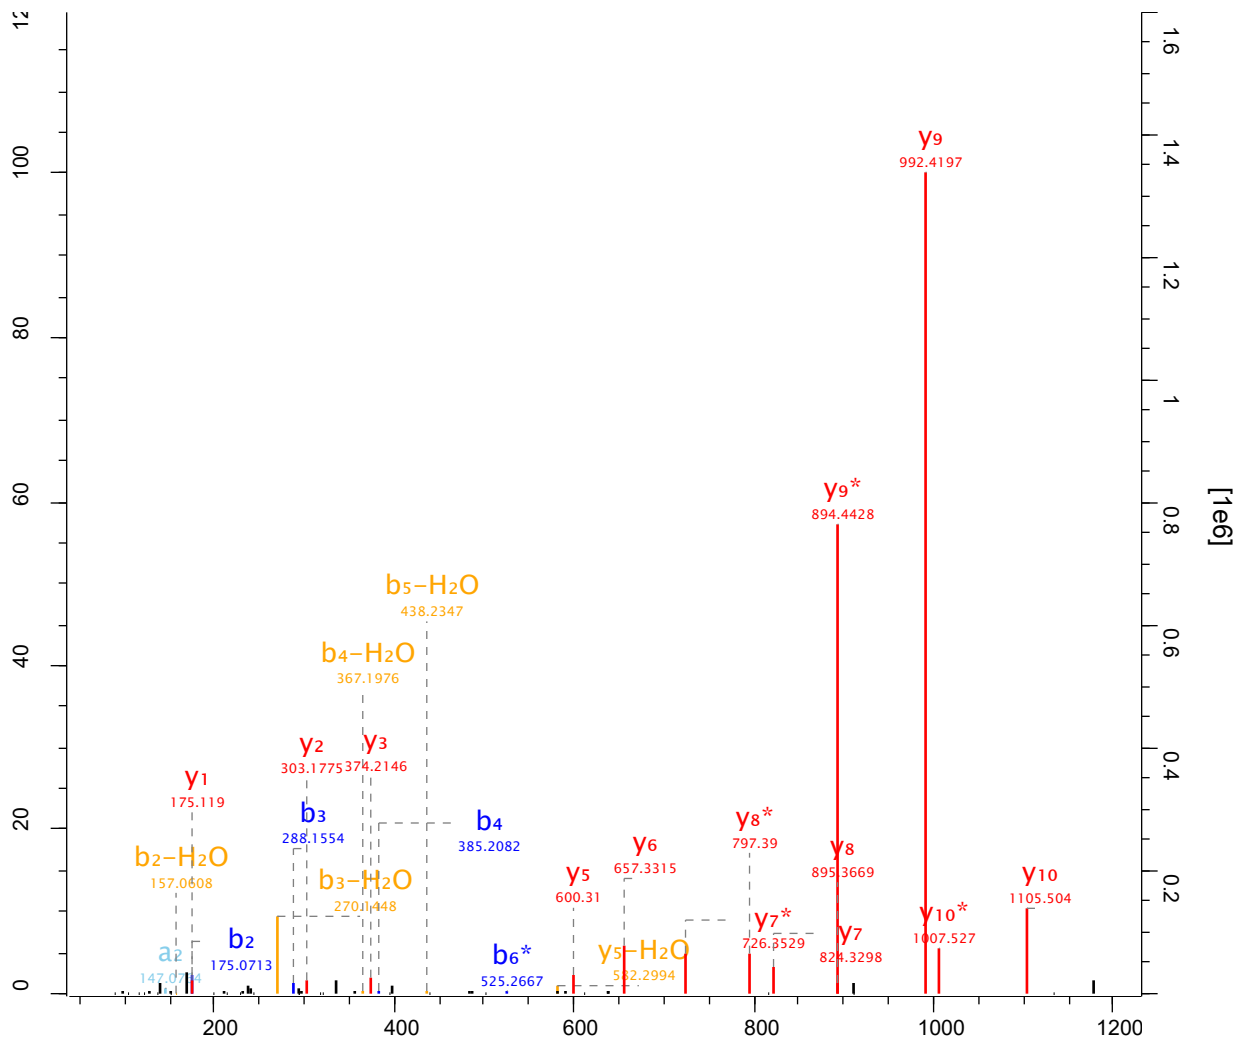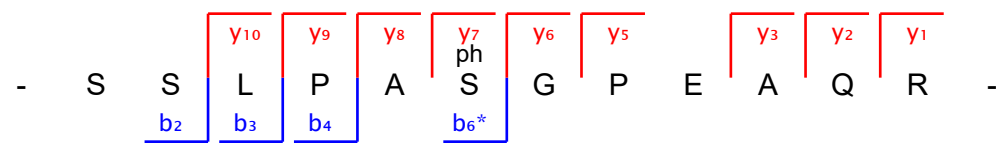

Raw file Scan Method Score m/z  
 sys\_05\_2 8807 FTMS; HCD 68.16 541.57

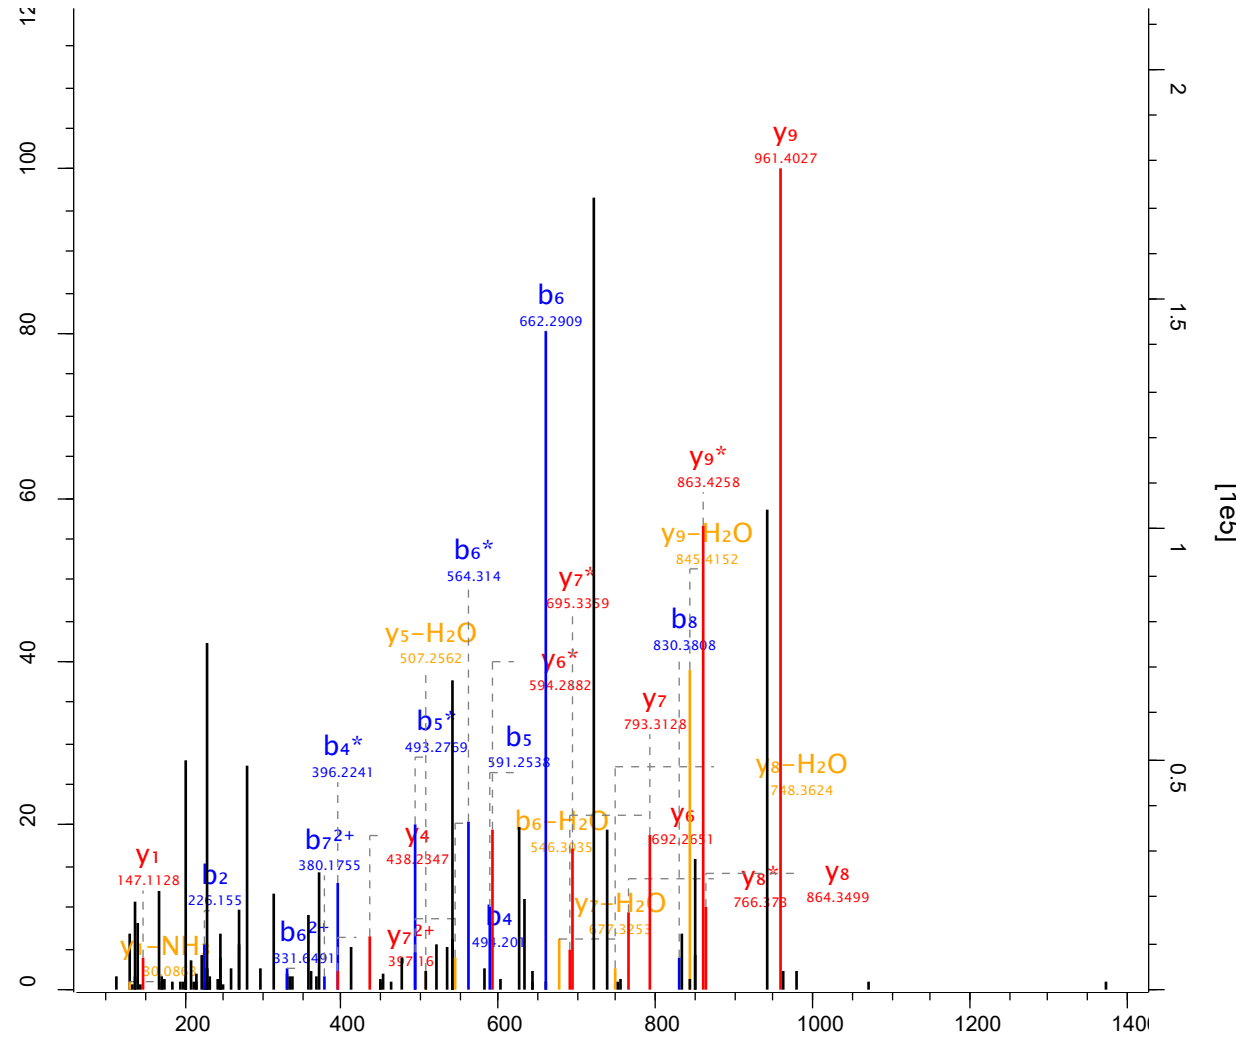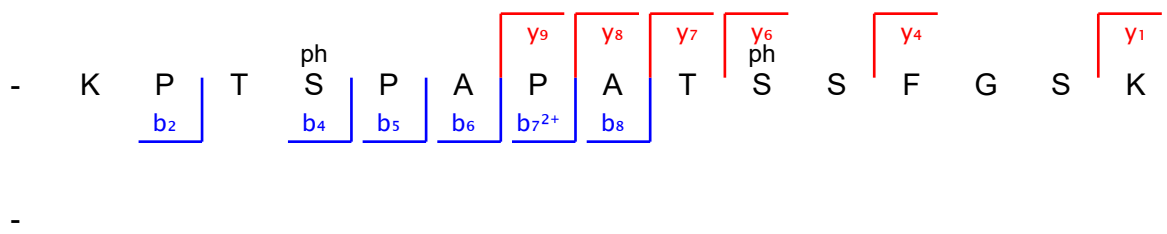

Raw file Scan Method Score m/z  
 sys\_05\_2 8887 FTMS; HCD 91.62 580.74

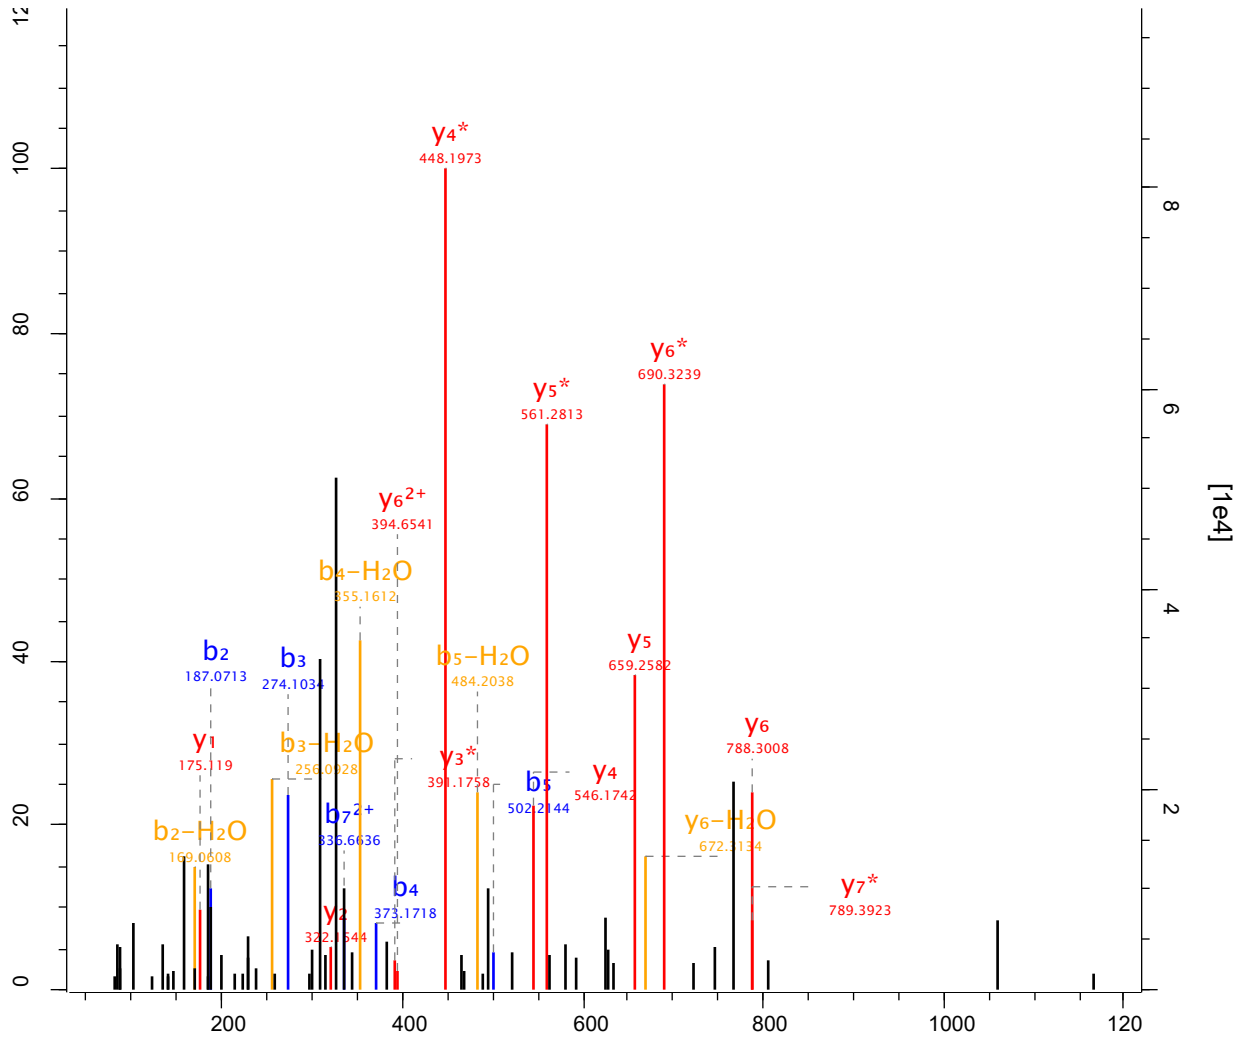

- E G S V E L G S ox M R -  
 b<sub>2</sub> b<sub>3</sub> b<sub>4</sub> b<sub>5</sub> b<sub>7</sub><sup>2+</sup> y<sub>7</sub>\* y<sub>6</sub> y<sub>5</sub> y<sub>4</sub> y<sub>3</sub>\* ph y<sub>2</sub> y<sub>1</sub>

Raw file Scan Method Score m/z  
 sys\_05\_2 8974 FTMS; HCD 287.16 826.89

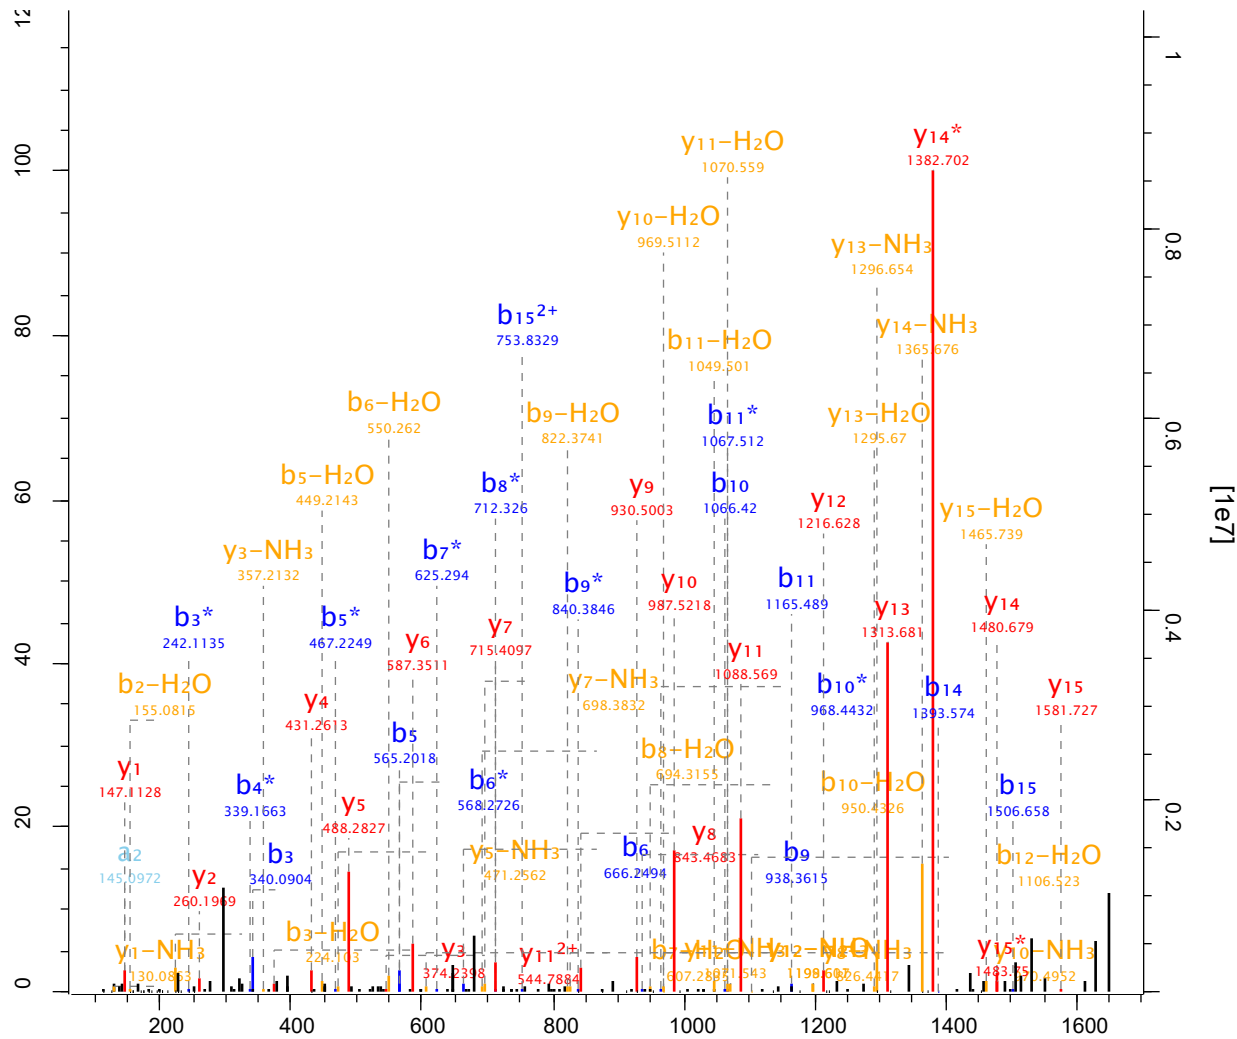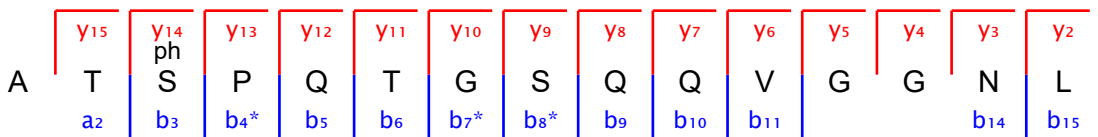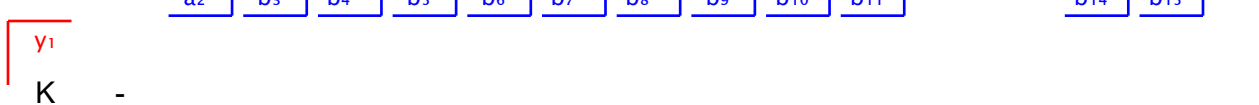



Raw file Scan Method Score m/z  
 sys\_05\_2 9095 FTMS; HCD 74.78 572.6

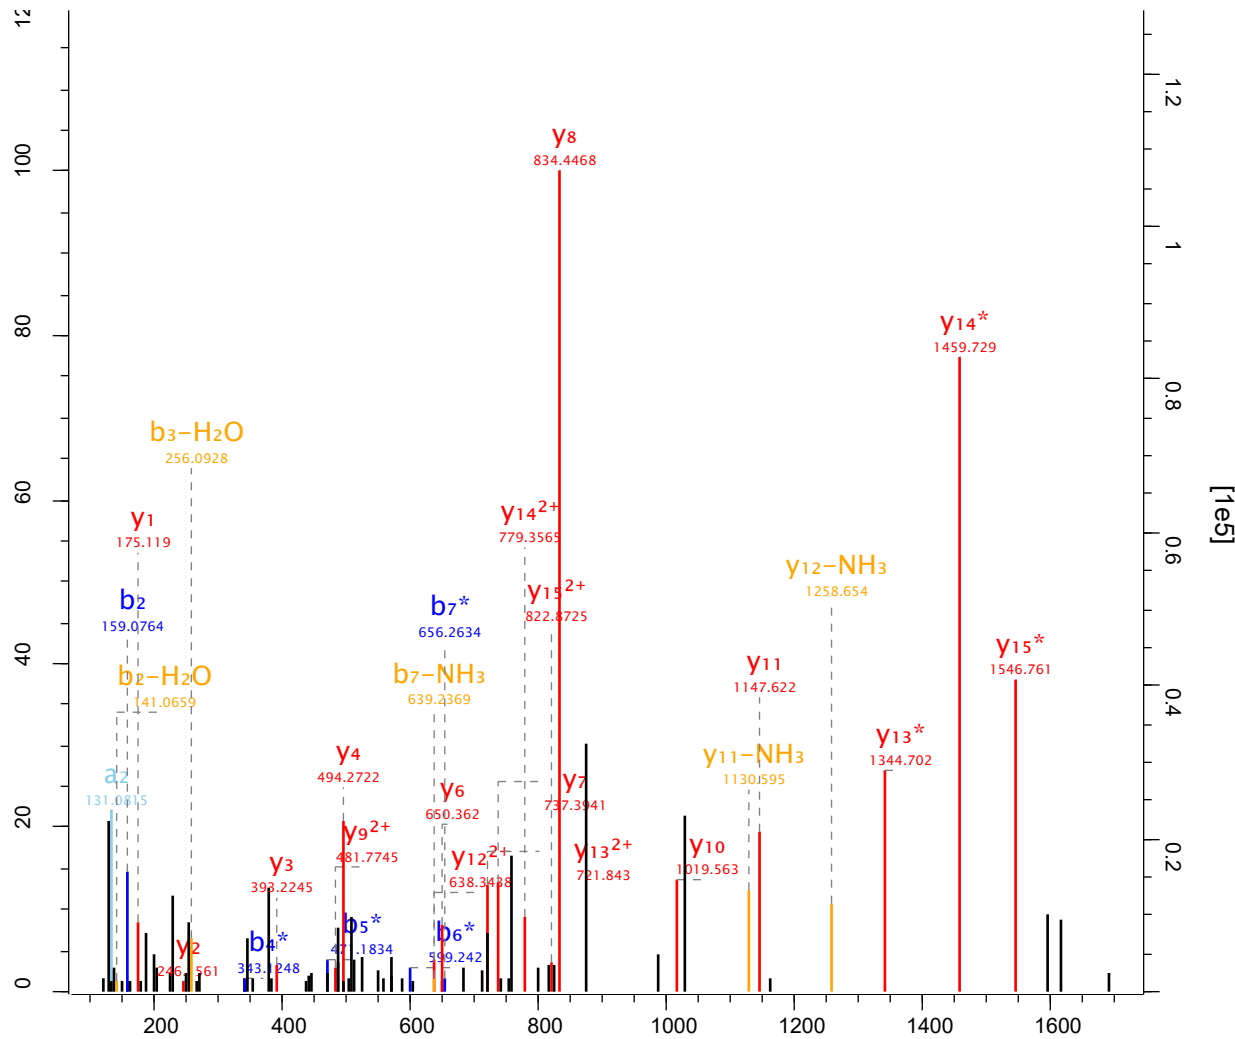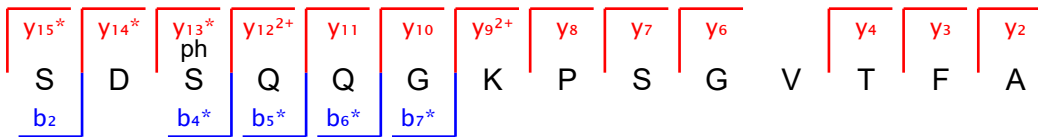

R -

Raw file Scan Method Score m/z  
 sys\_05\_2 9241 FTMS; HCD 181.35 701.79

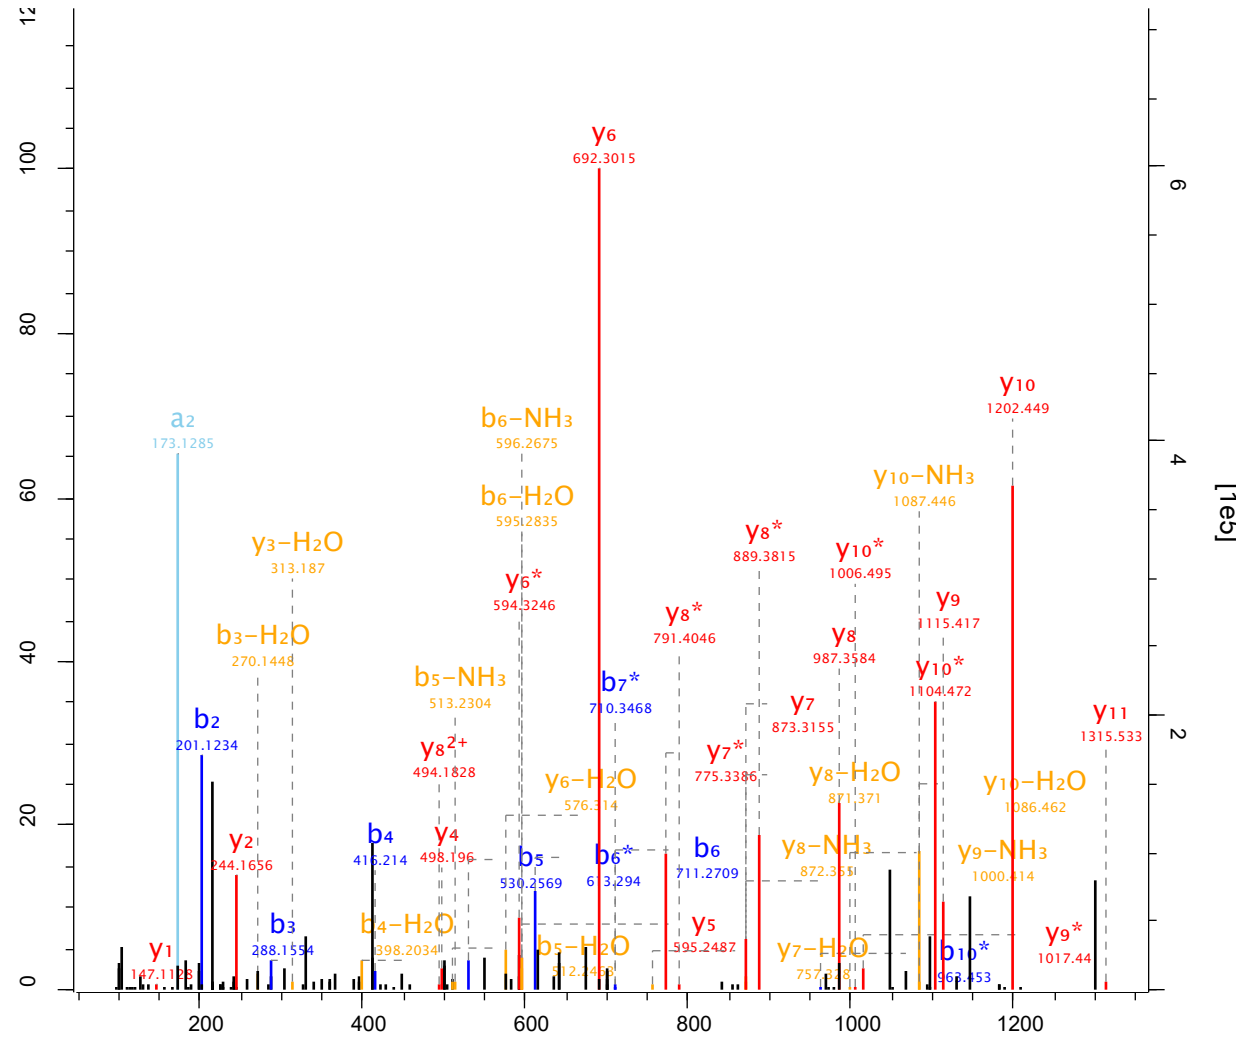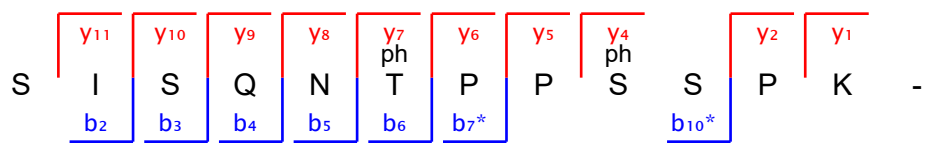

Raw file Scan Method Score m/z  
 sys\_05\_2 9347 FTMS; HCD 79.49 676.74

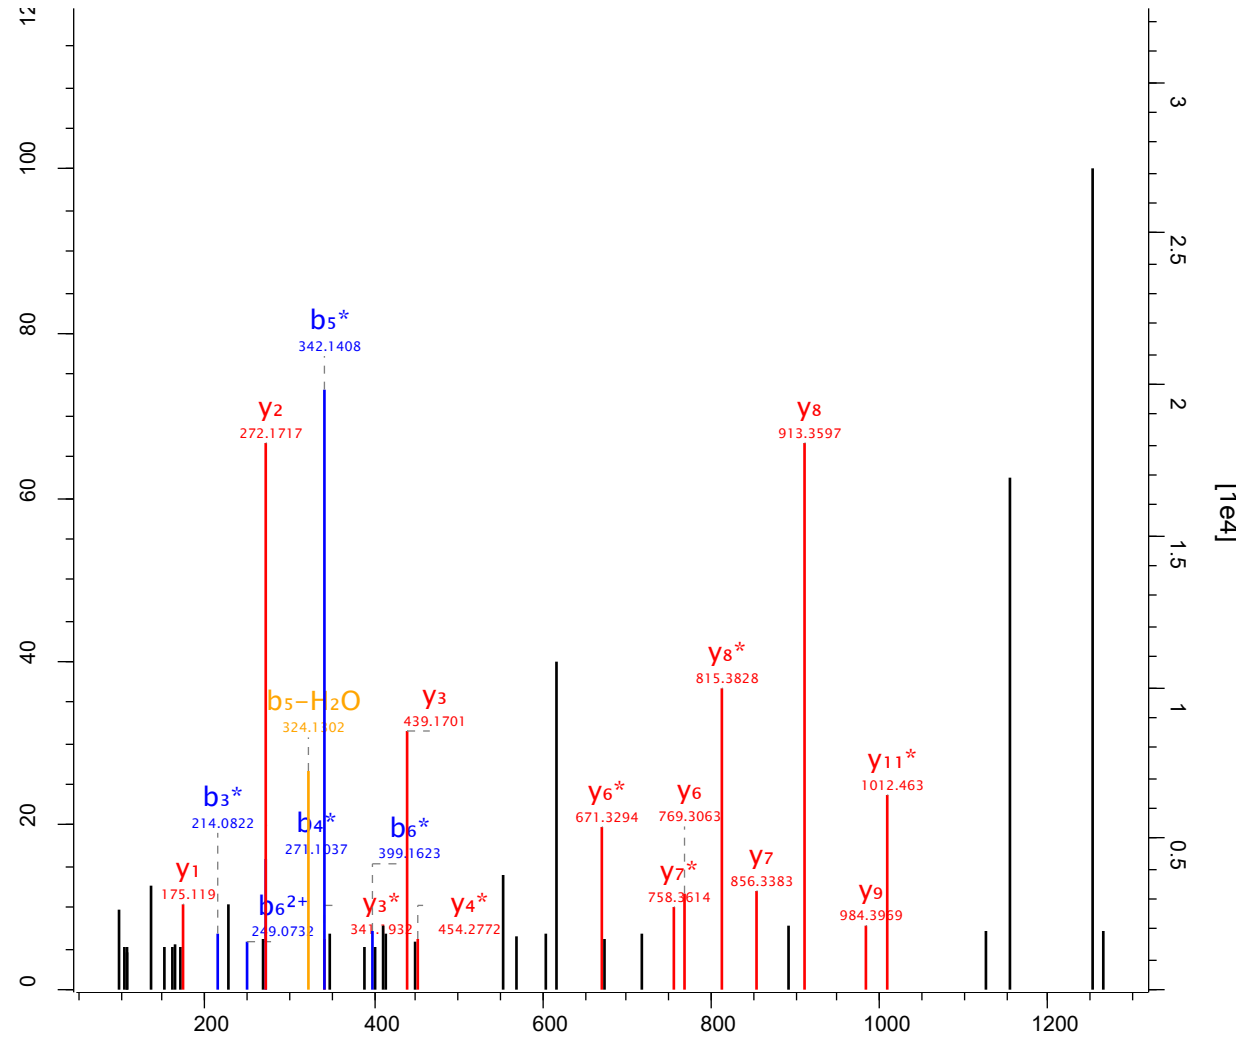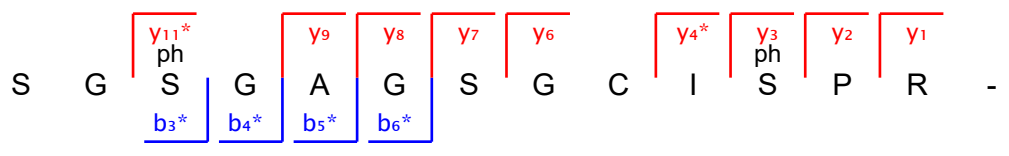

| Raw file | Scan | Method    | Score | m/z    |
|----------|------|-----------|-------|--------|
| sys_05_2 | 9355 | FTMS; HCD | 63.09 | 511.69 |

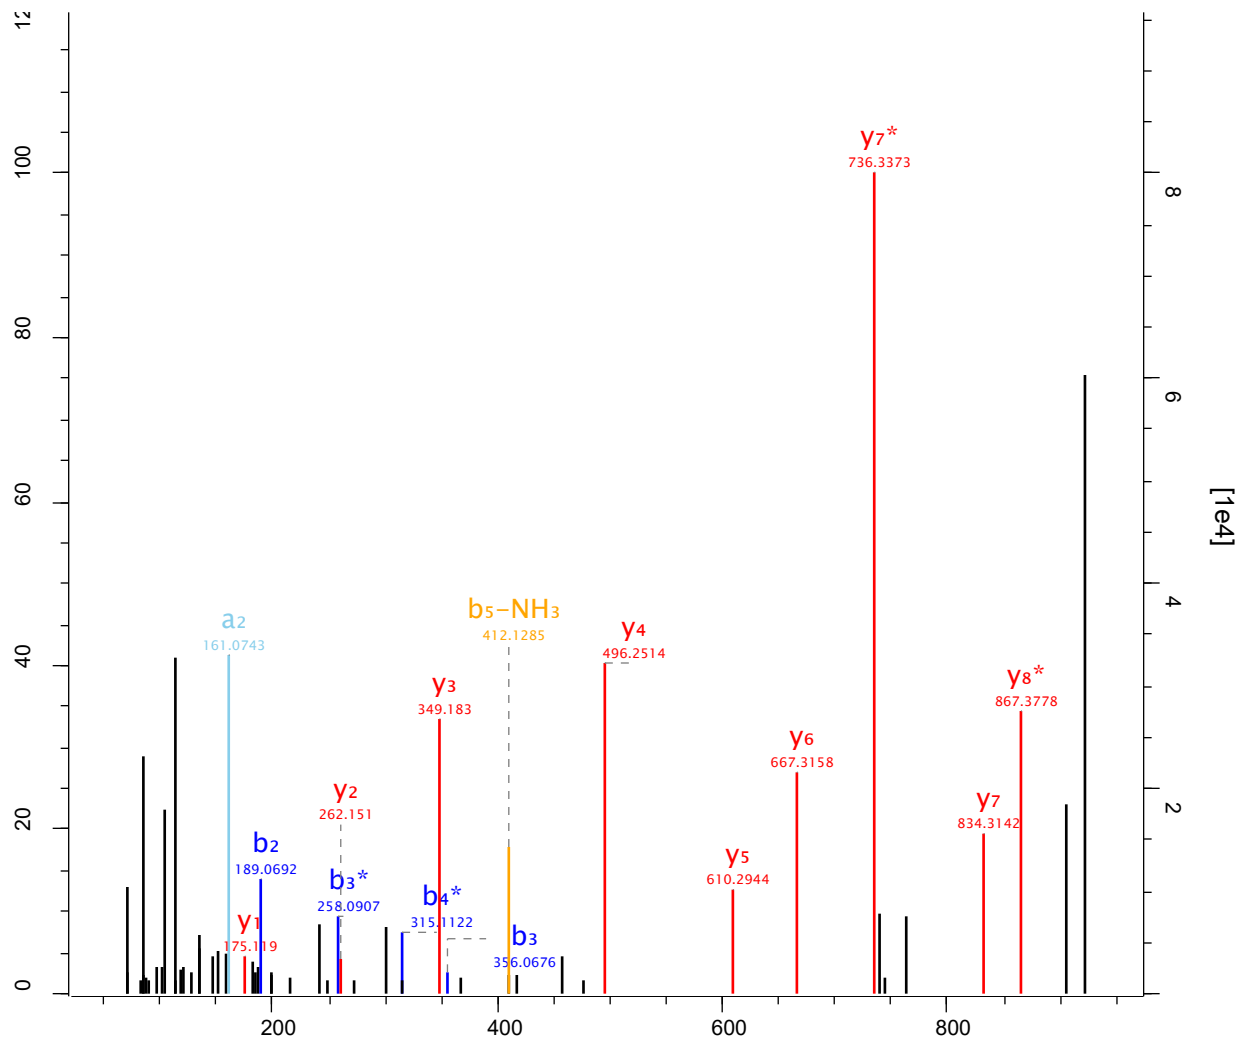

- G M S G N F S S R -  
 [y8\*] [y7] [y6] [y5] [y4] [y3] [y2] [y1]  
 [b2] [b3] [b4\*]

Raw file Scan Method Score m/z  
 sys\_05\_2 9458 FTMS; HCD 40.97 561.22

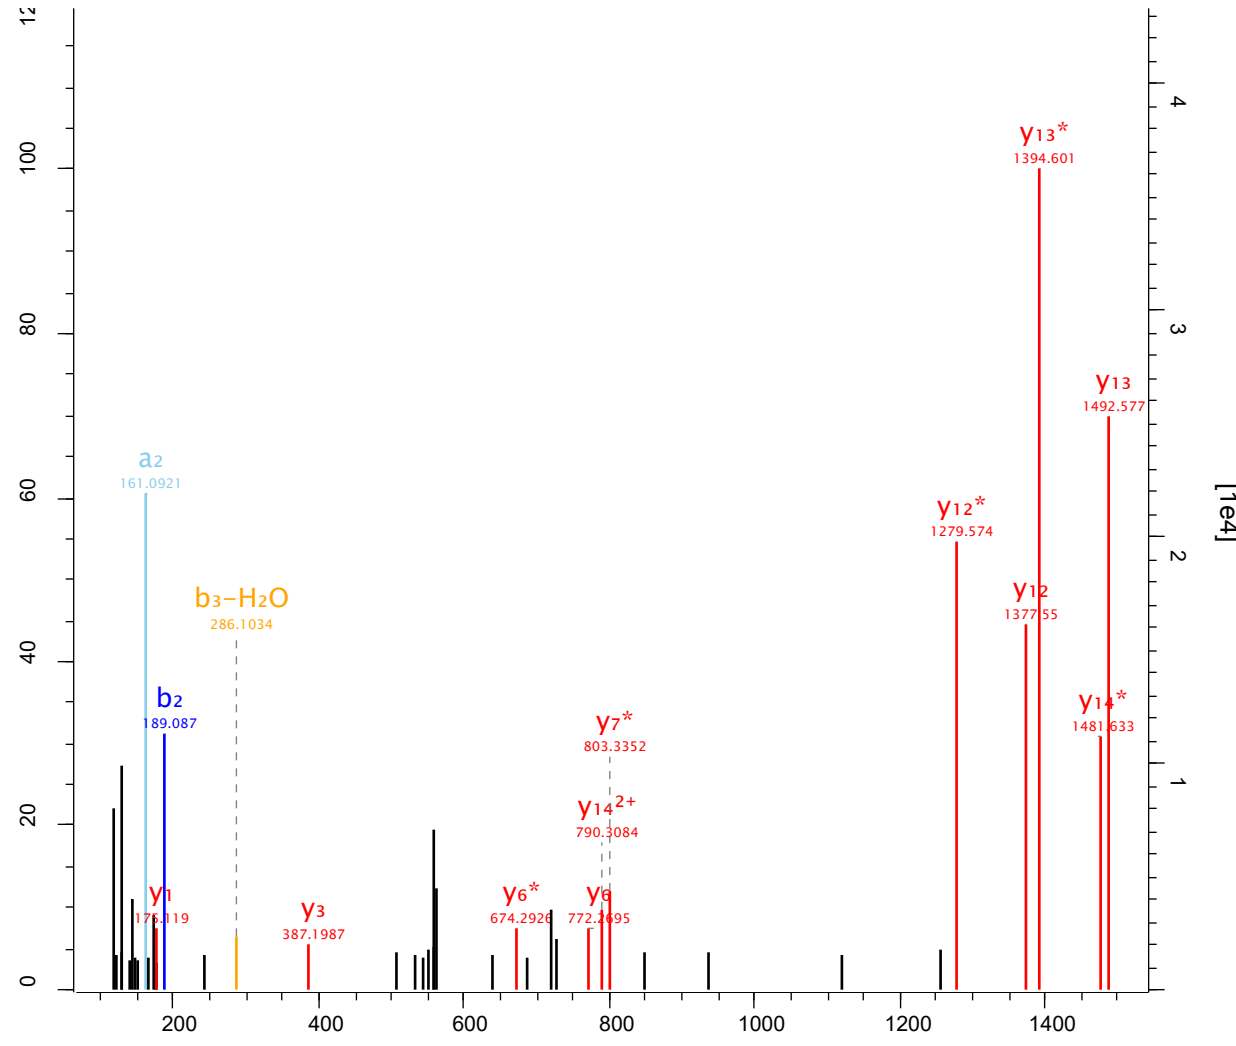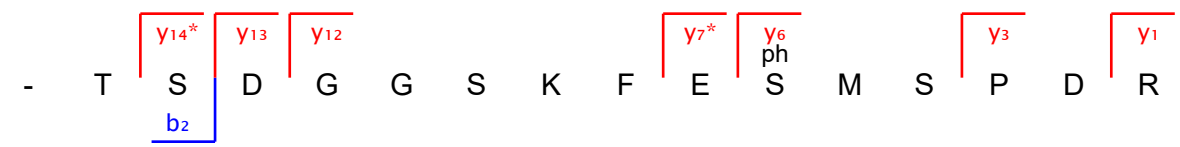

Raw file Scan Method Score m/z  
 sys\_05\_2 9492 FTMS; HCD 102.73 547.7

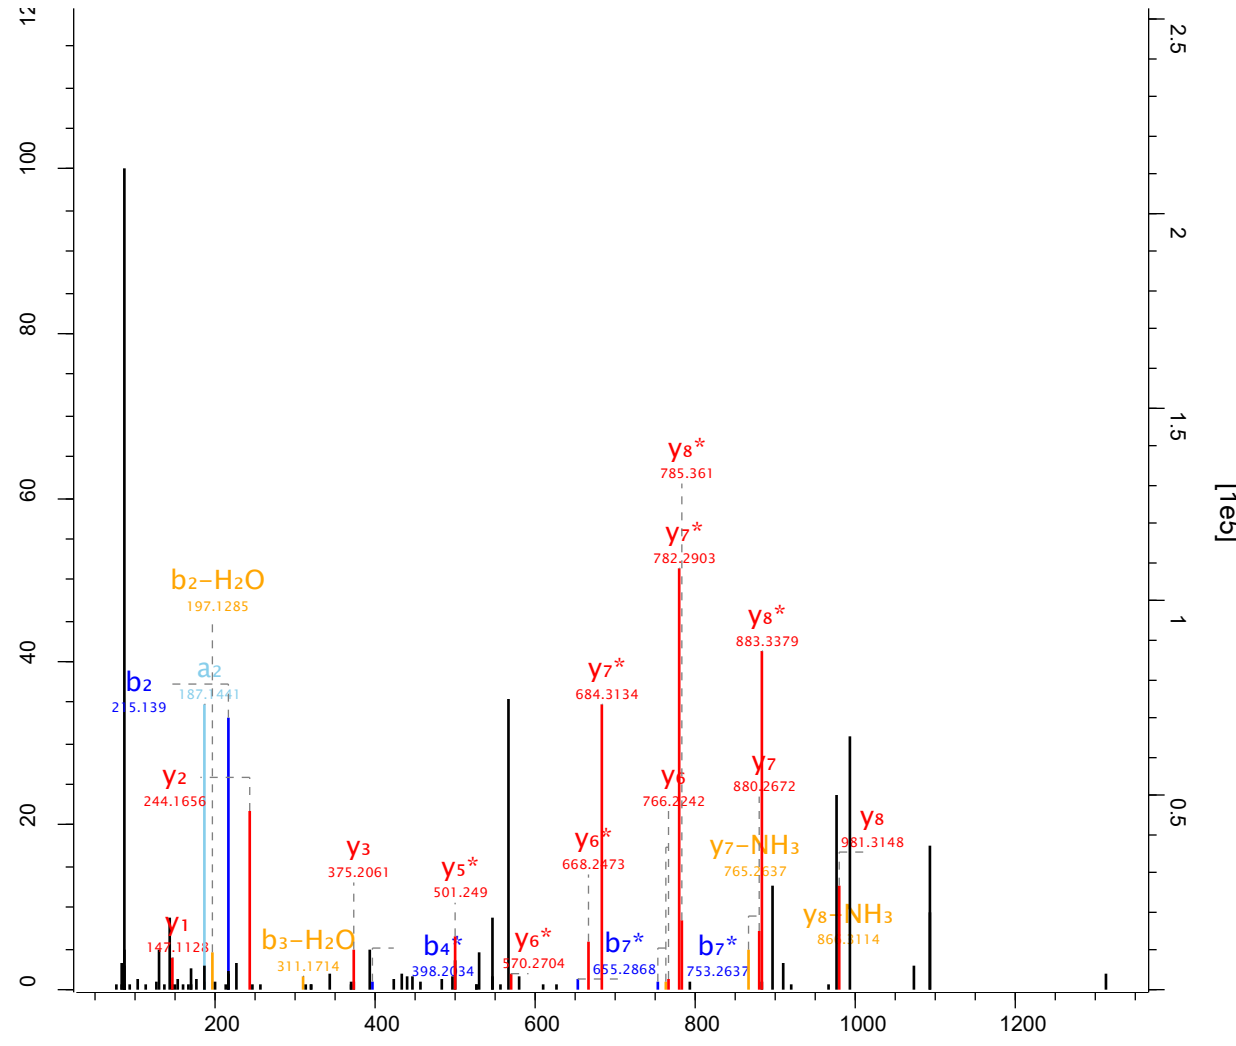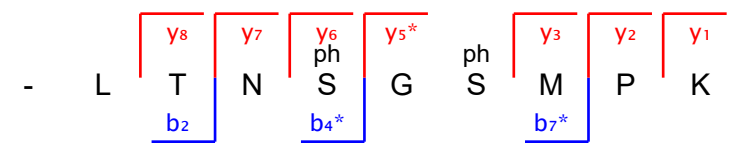

Raw file Scan Method Score m/z  
 sys\_05\_2 9617 FTMS; HCD 127.83 528.73

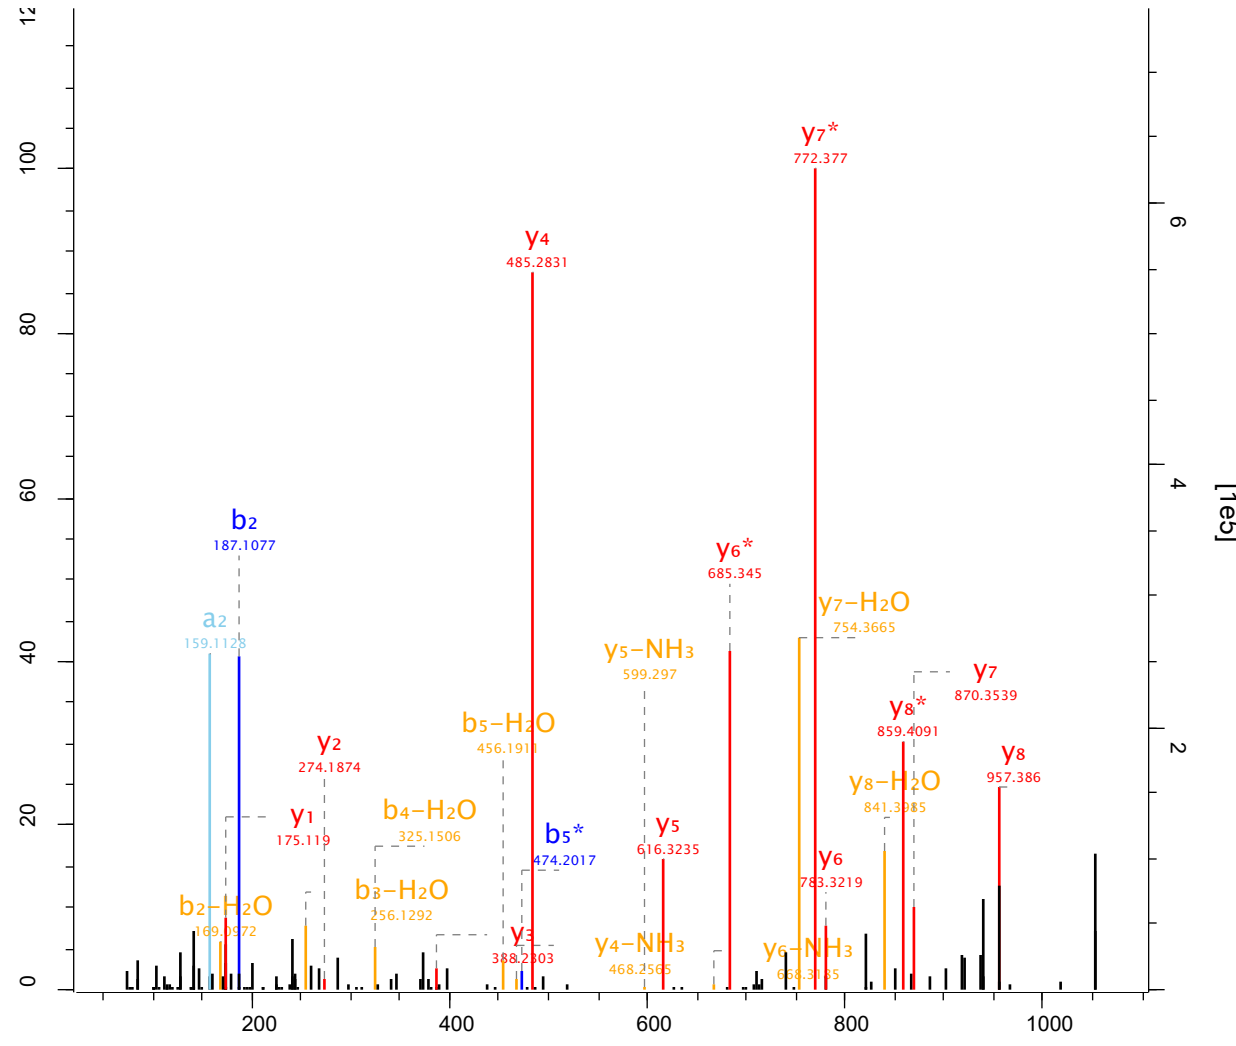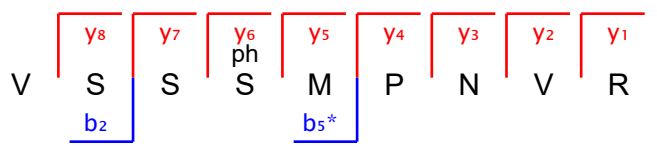

| Raw file | Scan | Method    | Score | m/z    |
|----------|------|-----------|-------|--------|
| sys_05_2 | 9646 | FTMS; HCD | 43.5  | 492.21 |

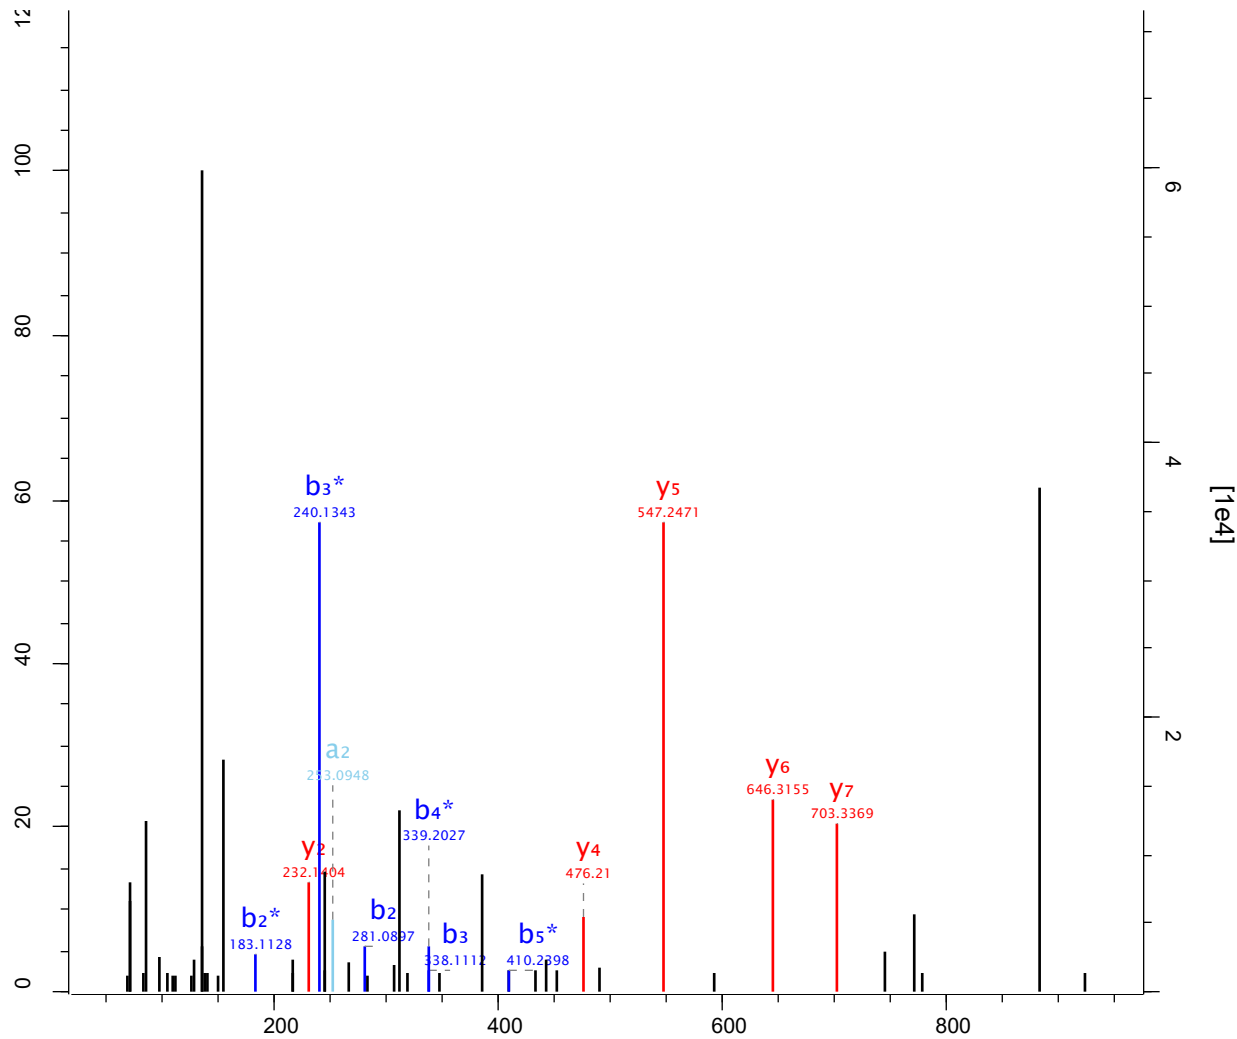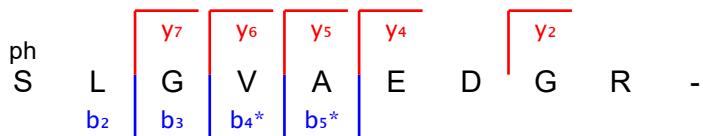



Raw file Scan Method Score m/z  
 sys\_05\_2 9769 FTMS; HCD 59.42 506.73

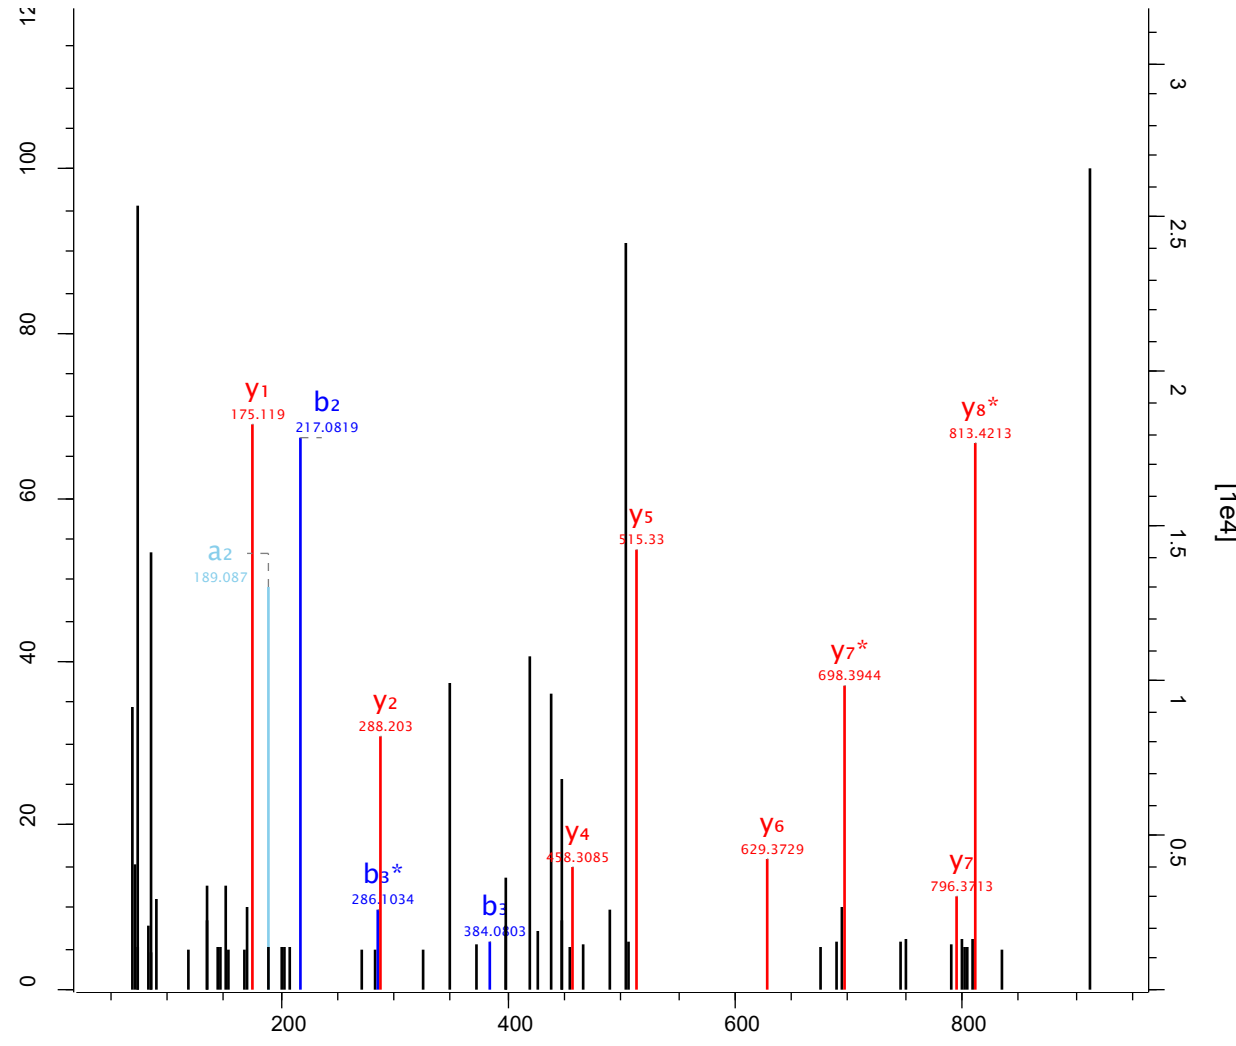

- T D S N G G L I R -

Annotations above the sequence:

- Red boxes: y<sub>8</sub>\* (above D), y<sub>7</sub> ph (above S), y<sub>6</sub> (above N), y<sub>5</sub> (above G), y<sub>4</sub> (above G), y<sub>2</sub> (above I), y<sub>1</sub> (above R)
- Blue boxes: b<sub>2</sub> (below D), b<sub>3</sub> (below S)

Raw file sys\_05\_2 Scan 9902 Method FTMS; HCD Score 246.8 m/z 676.3

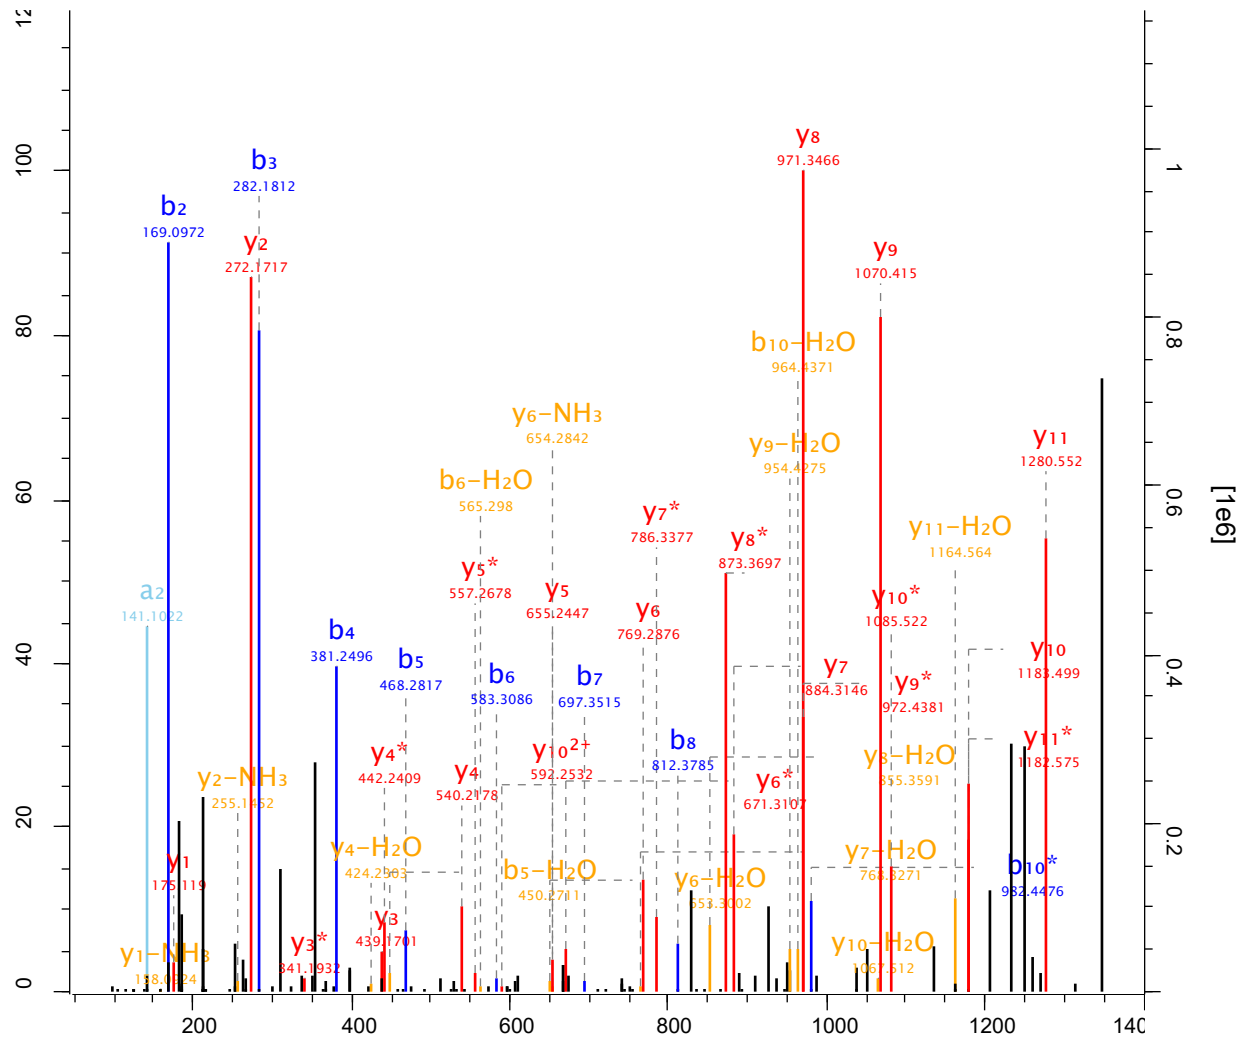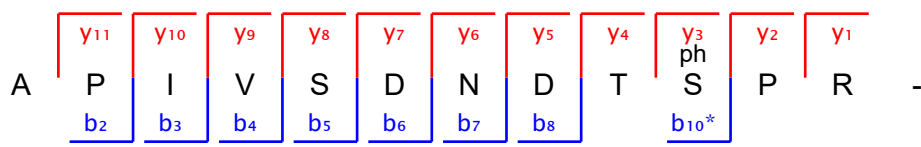

Raw file Scan Method Score m/z  
 sys\_05\_2 9997 FTMS; HCD 41.7 785.32

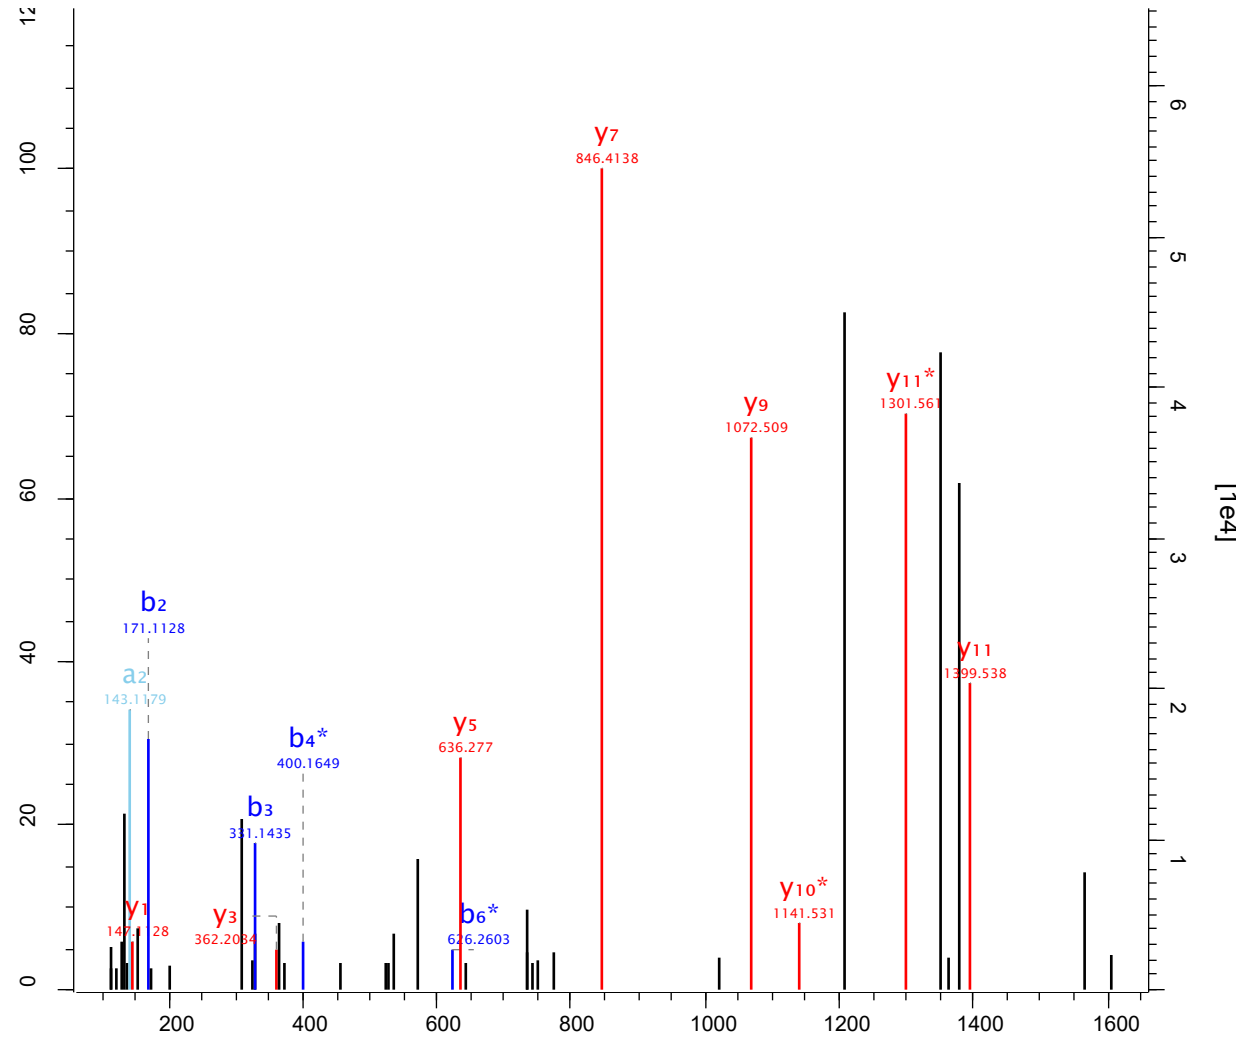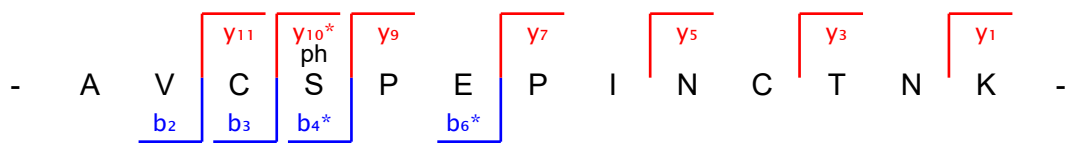

Raw file Scan Method Score m/z  
 sys\_05\_3 13608 FTMS; HCD 93.35 503.77

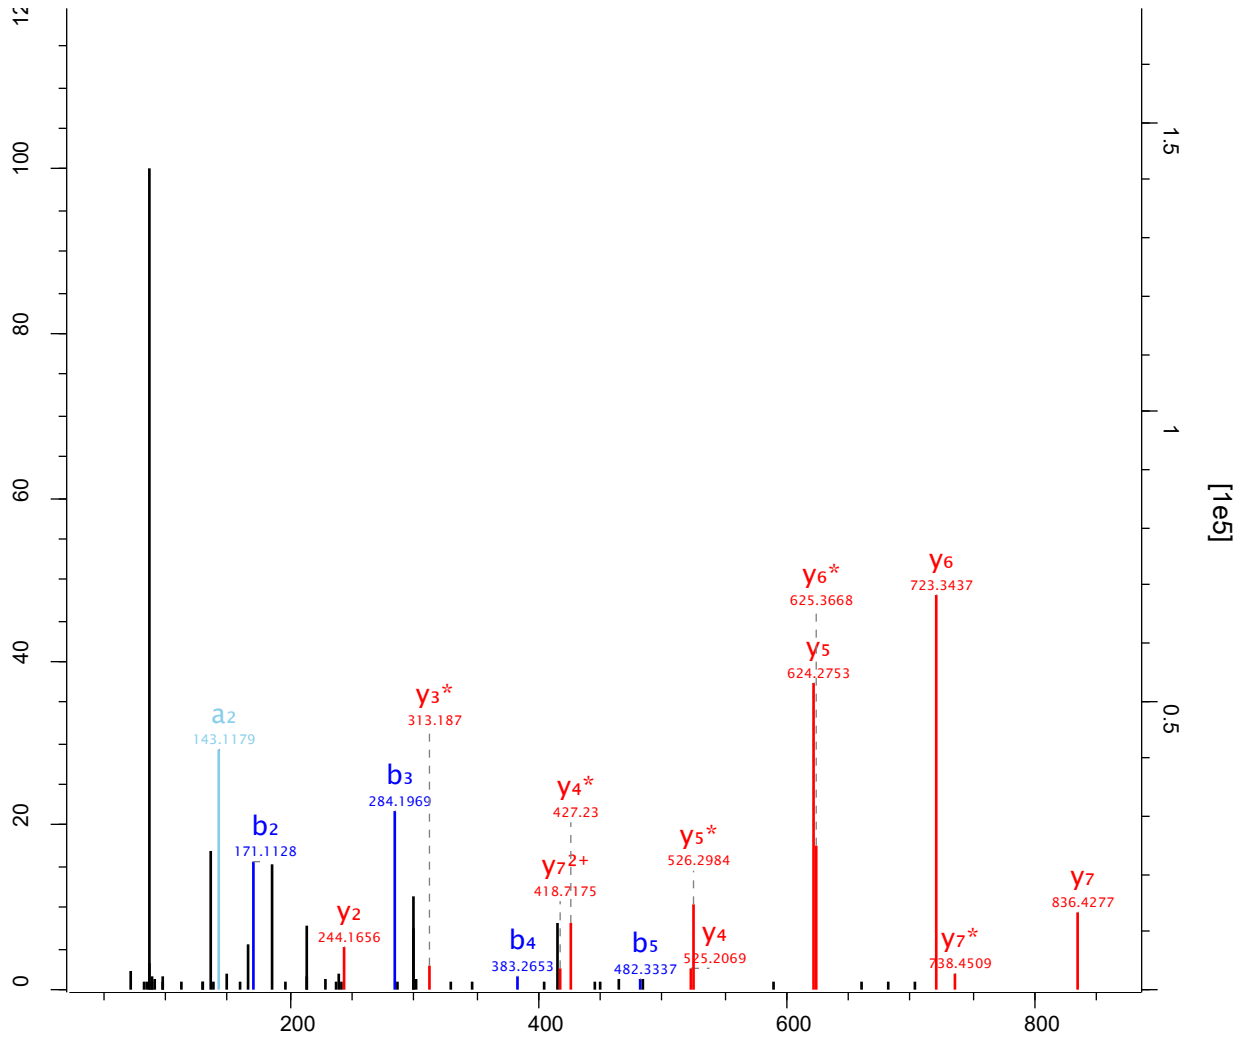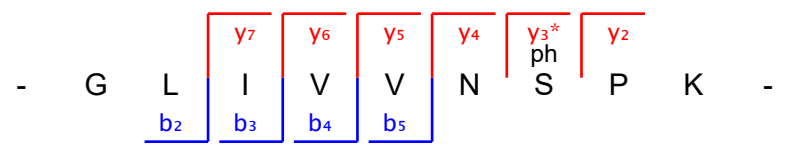

Raw file Scan Method Score m/z  
 sys\_05\_3 4381 FTMS; HCD 172.06 634.26

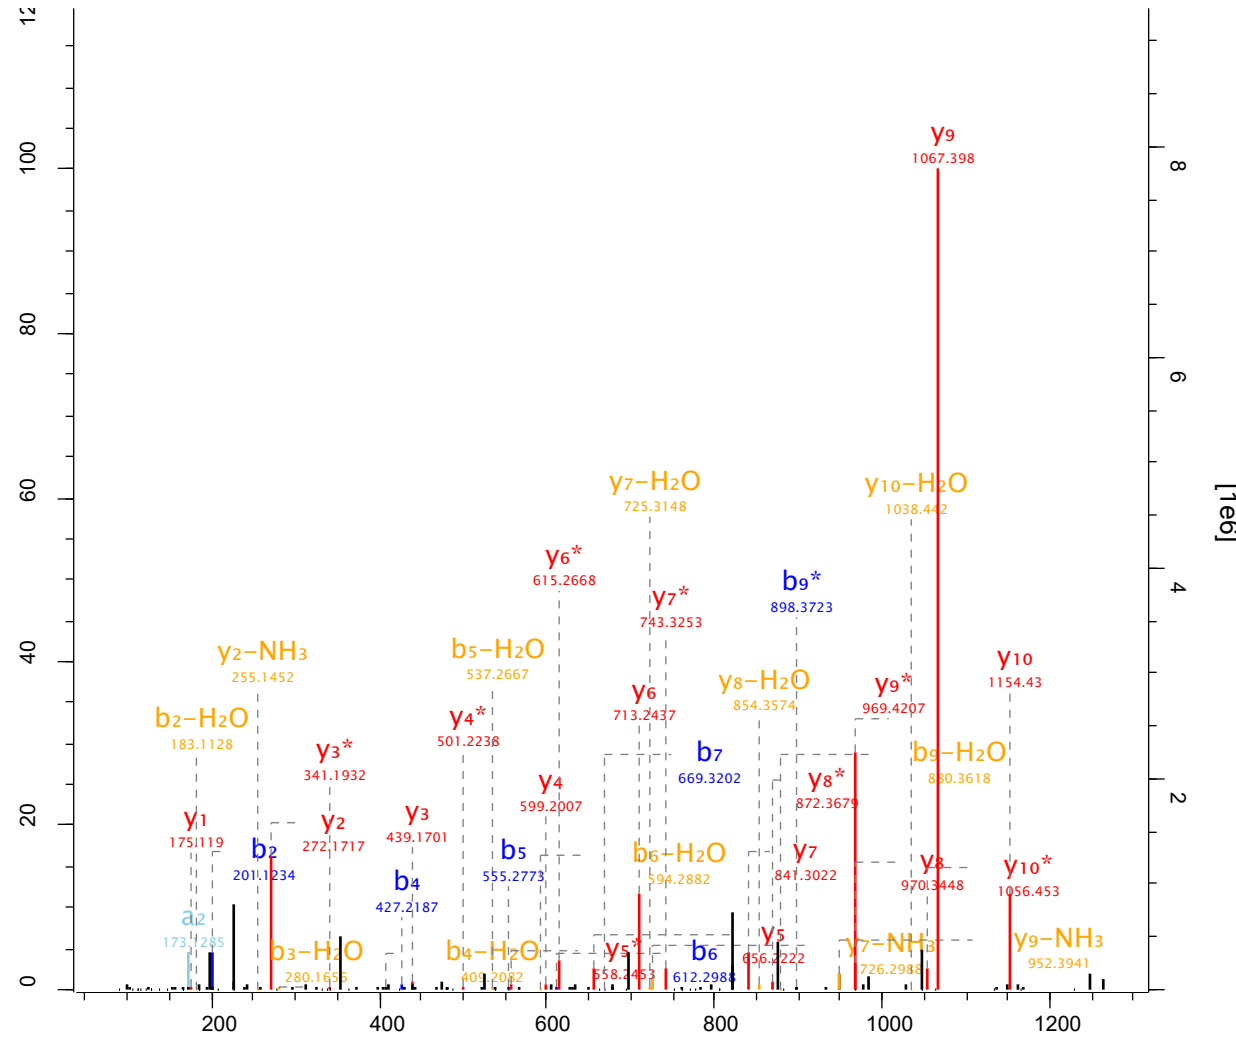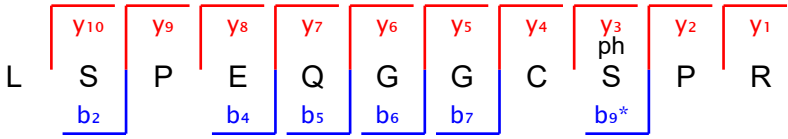

| Raw file | Scan | Method    | Score | m/z    |
|----------|------|-----------|-------|--------|
| sys_05_3 | 8633 | FTMS; HCD | 57.79 | 443.69 |

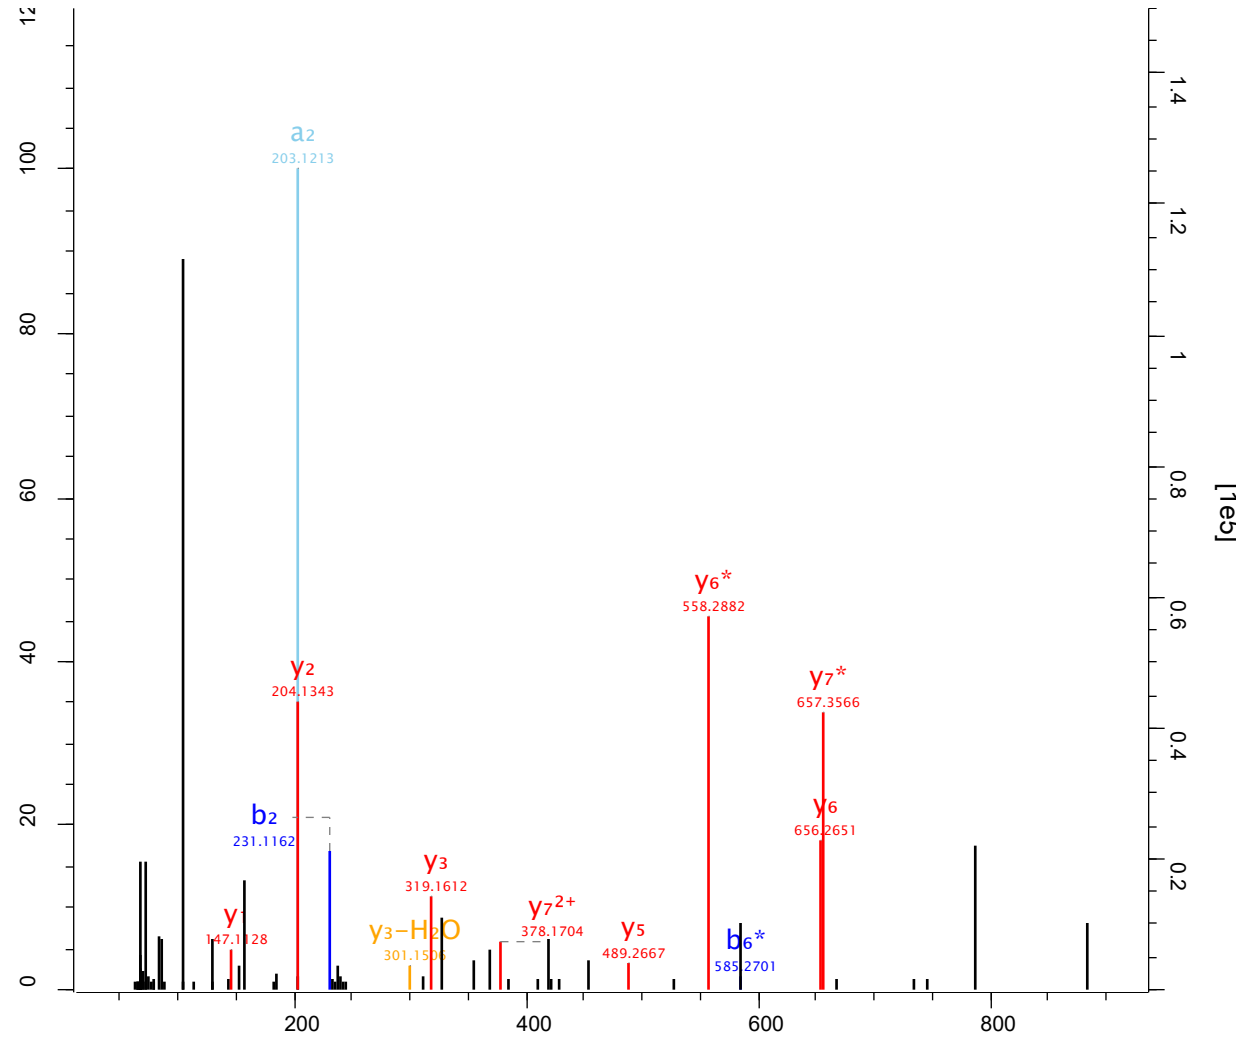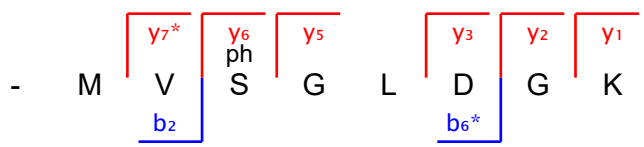

Raw file Scan Method Score m/z  
 sys\_15\_1 10064 FTMS; HCD 109.44 684.28

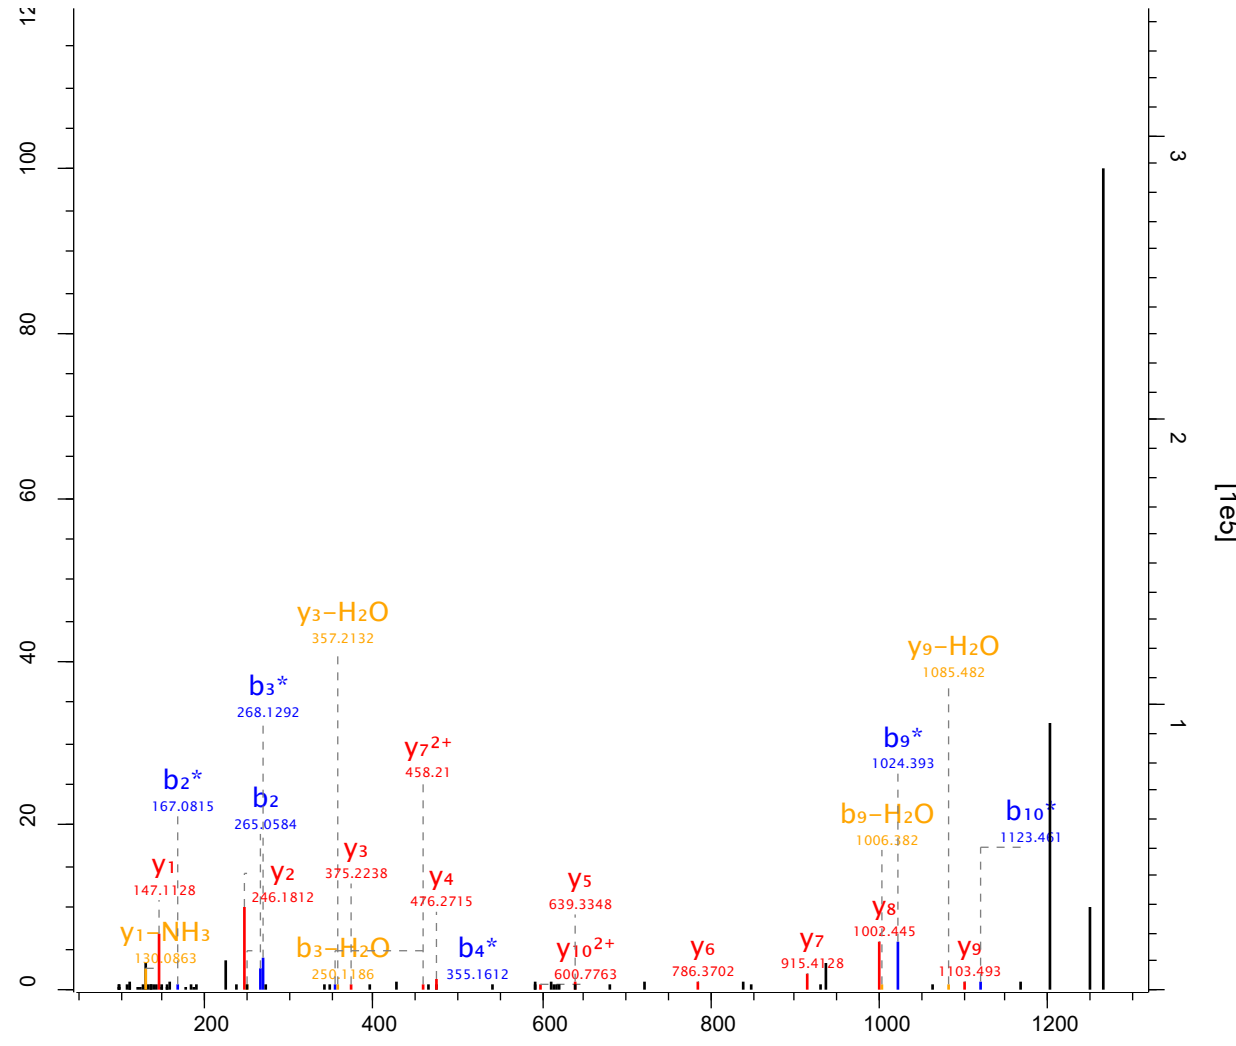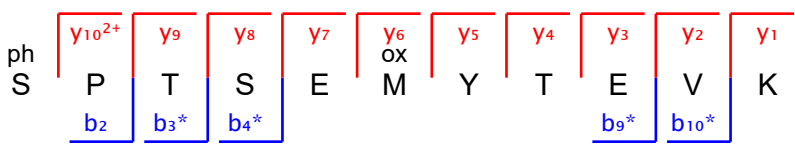

Raw file Scan Method Score m/z  
 sys\_15\_1 10104 FTMS; HCD 111.95 421.7

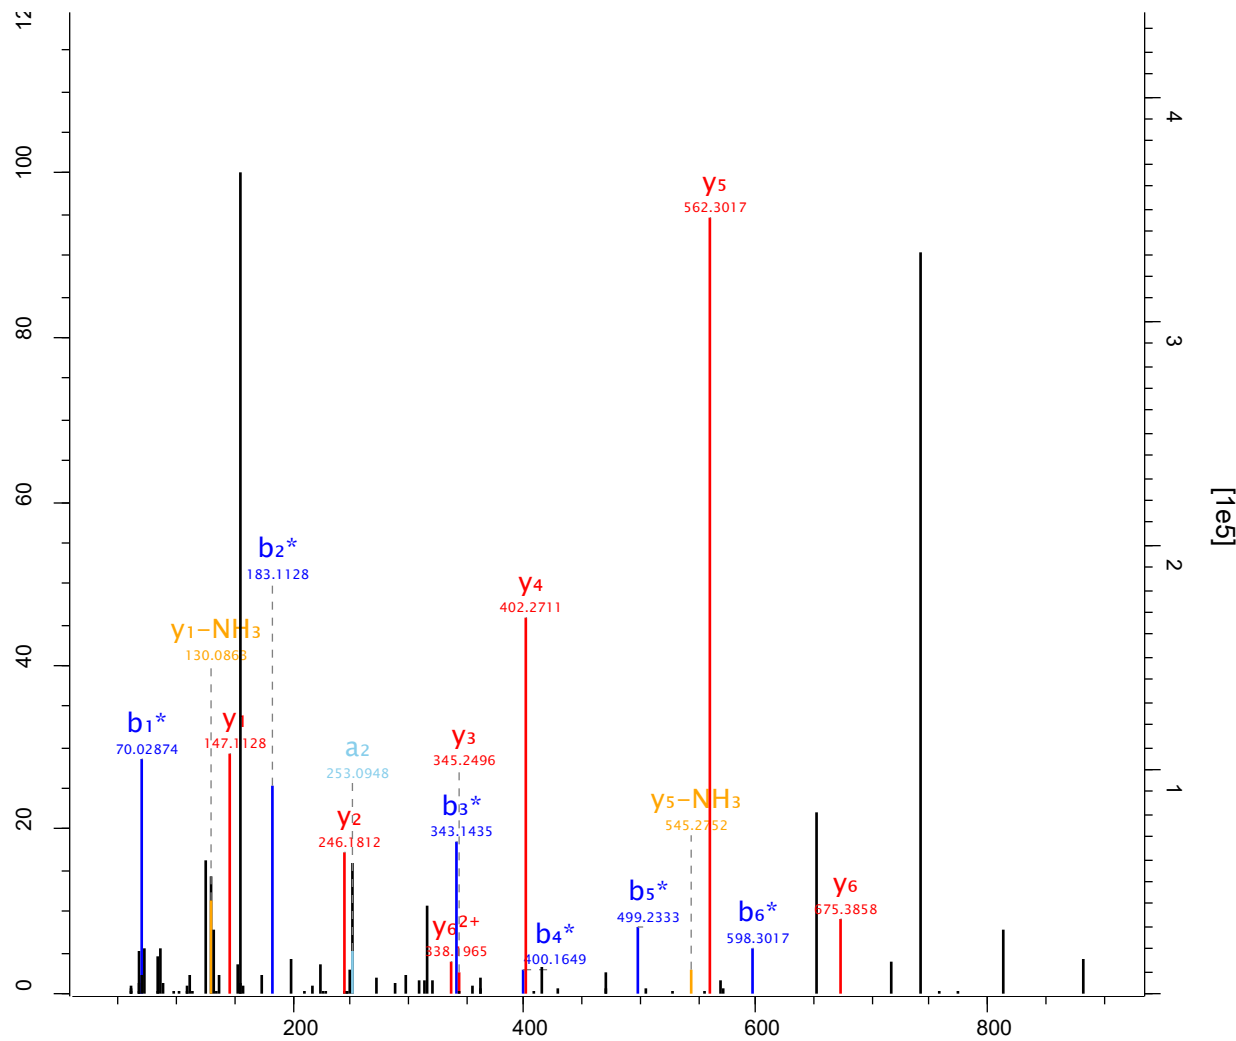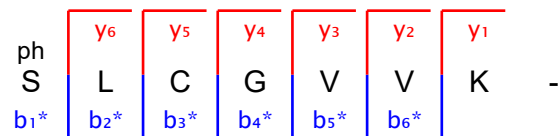



Raw file Scan Method Score m/z  
 sys\_15\_1 10119 FTMS; HCD 117.02 517.71

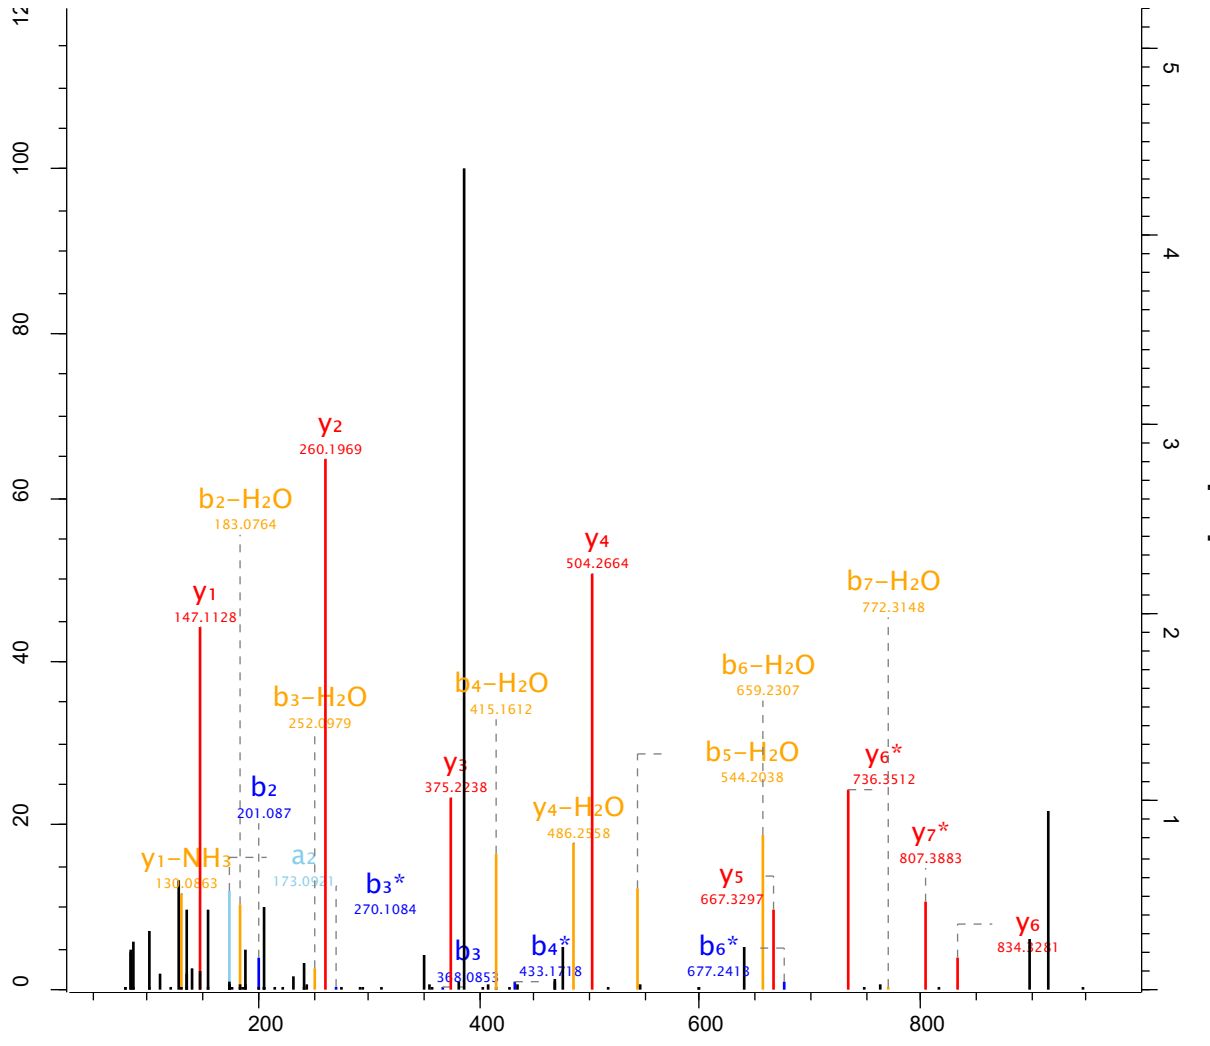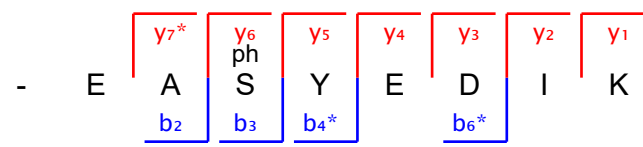

Raw file Scan Method Score m/z  
 sys\_15\_1 10136 FTMS; HCD 139.81 853.3

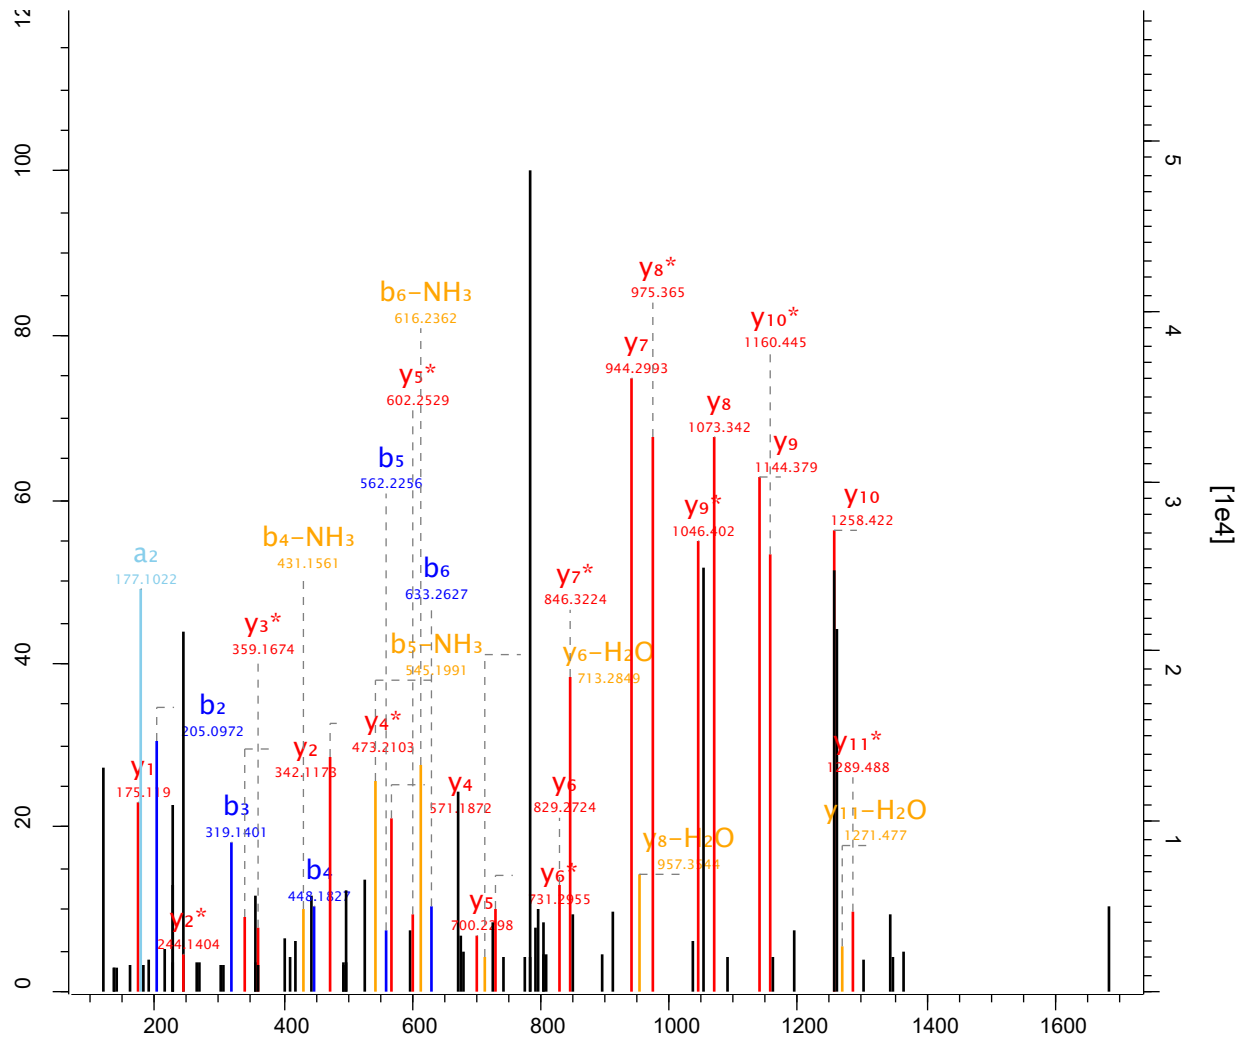

- G F N E N A E D E E N D S R -

b<sub>2</sub>
b<sub>3</sub>
b<sub>4</sub>
b<sub>5</sub>
b<sub>6</sub>
y<sub>11</sub>\*
y<sub>10</sub>
y<sub>9</sub>
y<sub>8</sub>
y<sub>7</sub>
y<sub>6</sub>
y<sub>5</sub>
y<sub>4</sub>
y<sub>3</sub>\*
y<sub>2</sub>  
ph
y<sub>1</sub>

Raw file Scan Method Score m/z  
 sys\_15\_1 10175 FTMS; HCD 281.96 834.34

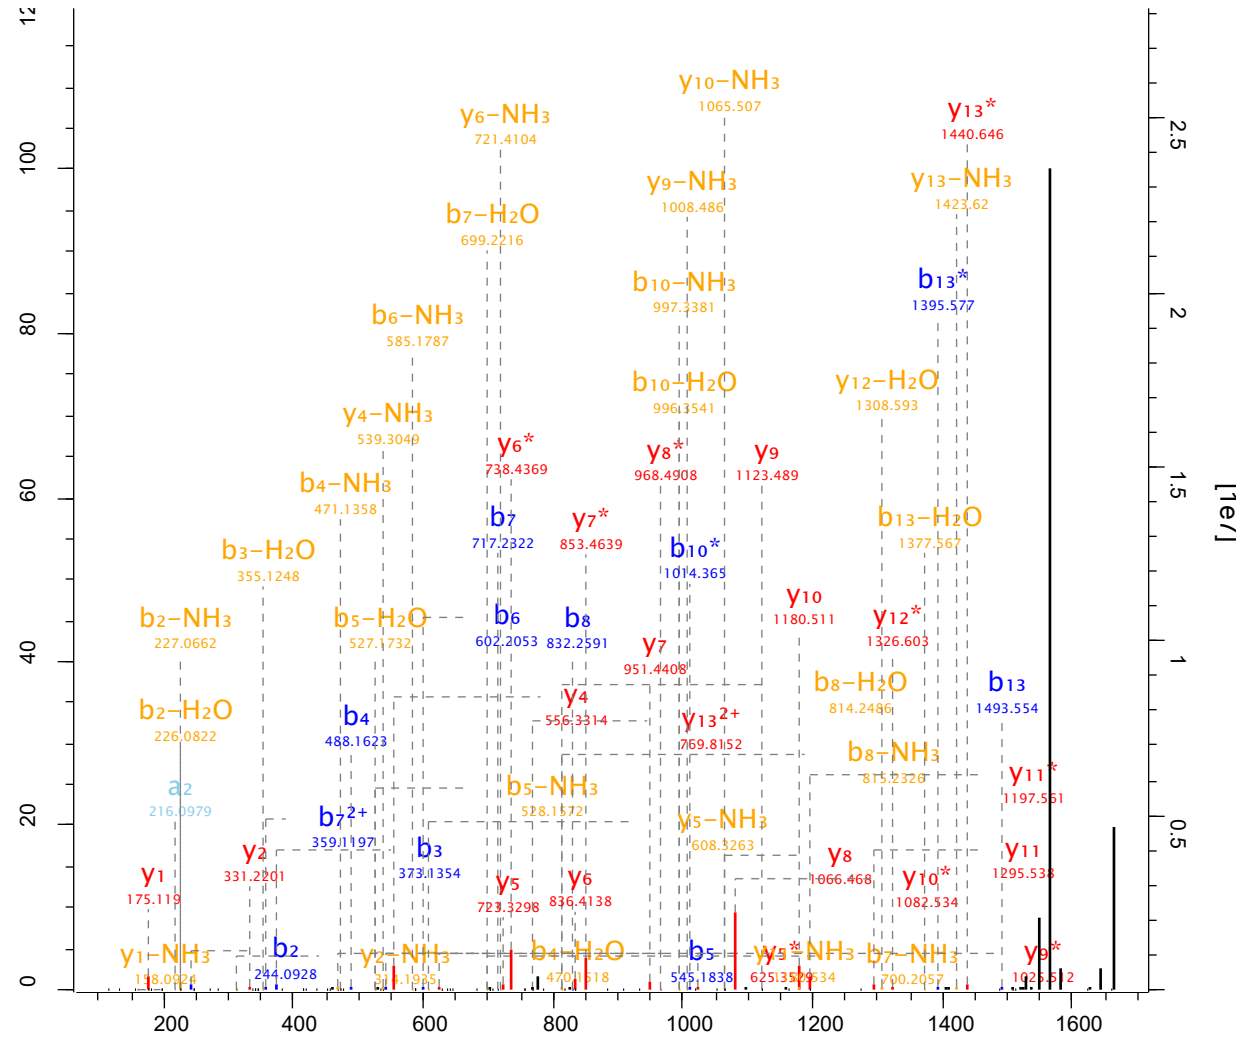

ac  
 S N E D G G D D L S P Q R R -  
 b<sub>2</sub> b<sub>3</sub> b<sub>4</sub> b<sub>5</sub> b<sub>6</sub> b<sub>7</sub> b<sub>8</sub> b<sub>10</sub>\* b<sub>13</sub>

Raw file Scan Method Score m/z  
 sys\_15\_1 10178 FTMS; HCD 70.44 540.75

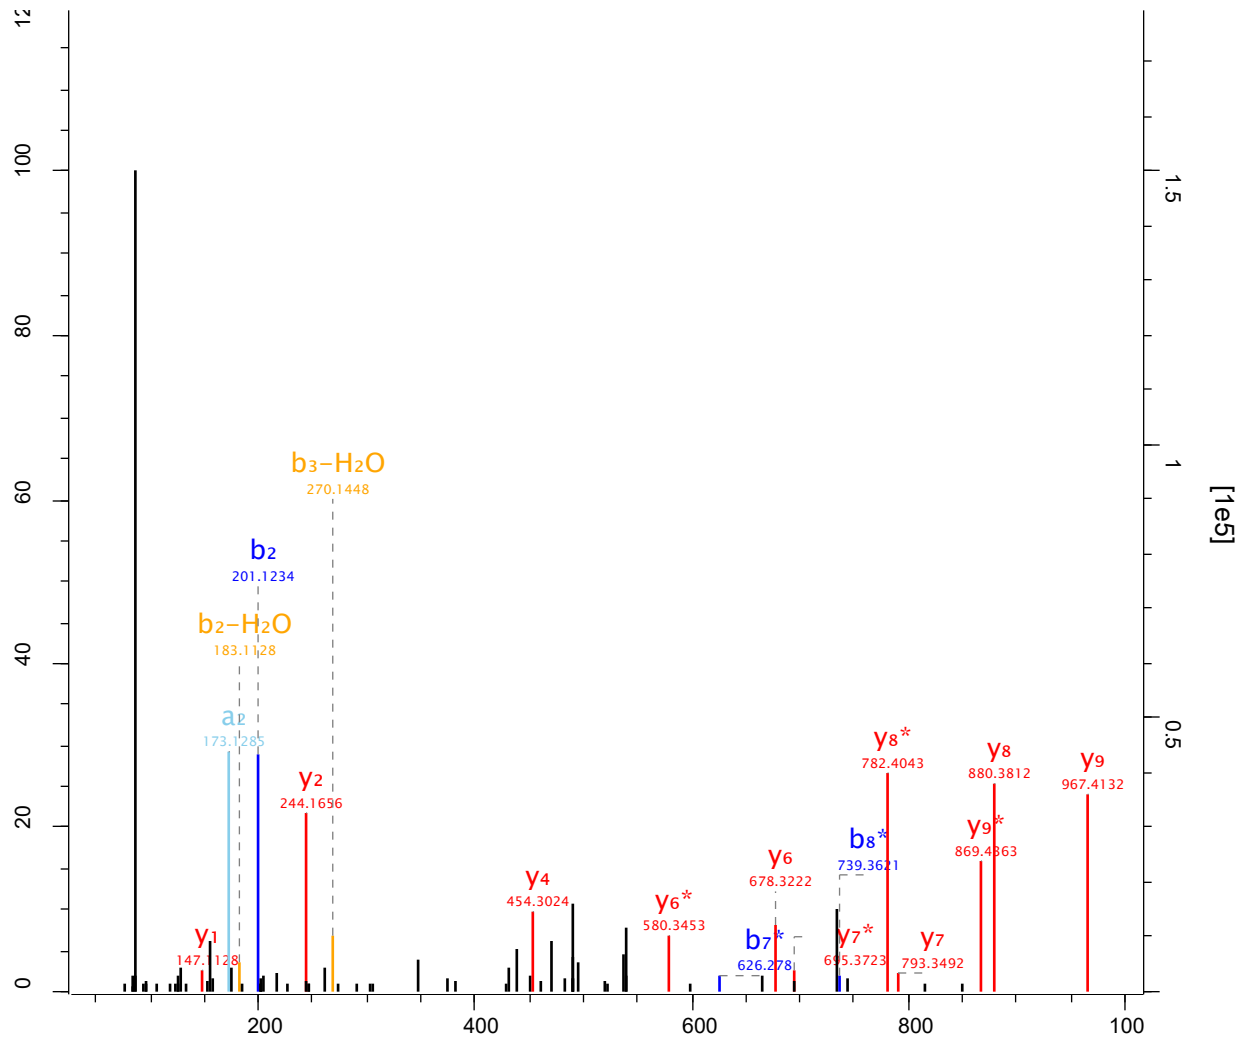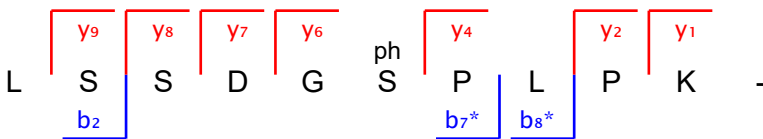

Raw file Scan Method Score m/z  
 sys\_15\_1 10190 FTMS; HCD 81.85 768.26

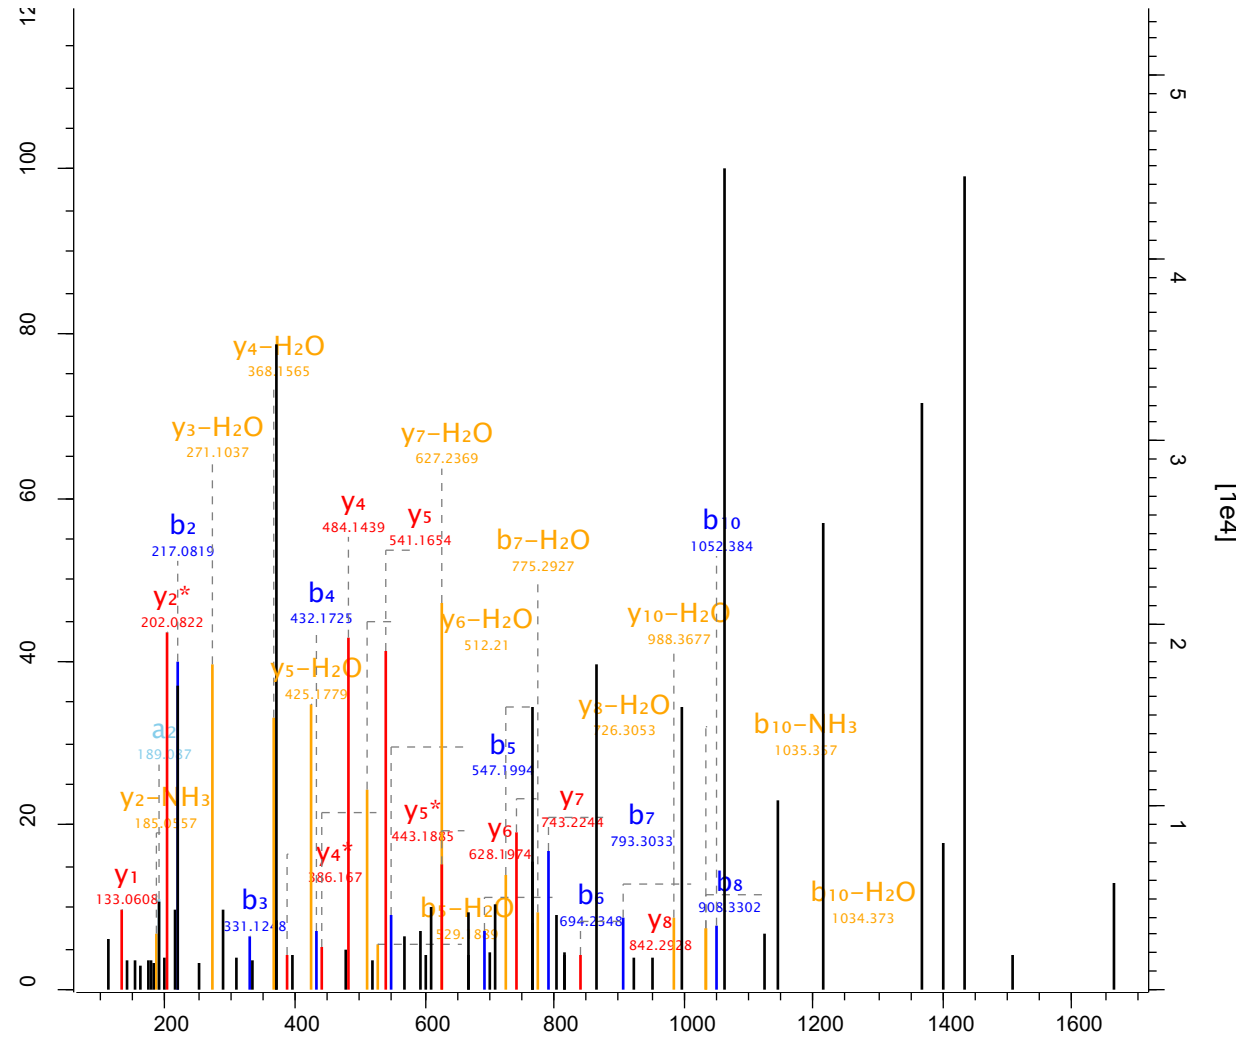

- S E N T D M ox V D S G P S y2\*ph S y1 -

b<sub>2</sub>
b<sub>3</sub>
b<sub>4</sub>
b<sub>5</sub>
b<sub>6</sub>
y<sub>8</sub>
y<sub>7</sub>
y<sub>6</sub>
y<sub>5</sub>
y<sub>4</sub>
b<sub>10</sub>

Raw file Scan Method Score m/z  
 sys\_15\_1 10226 FTMS; HCD 214.89 713.83

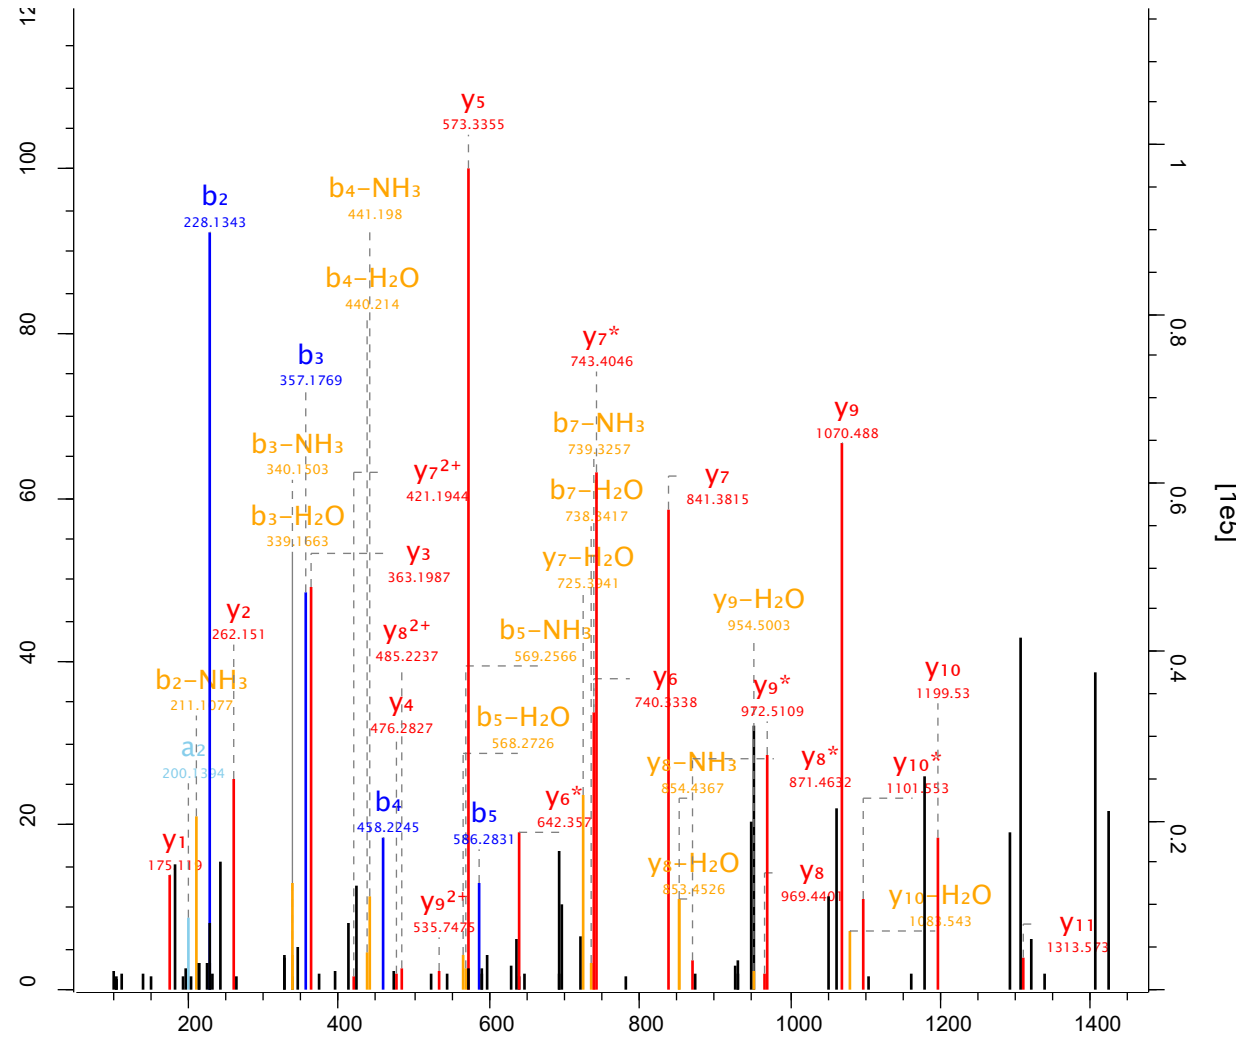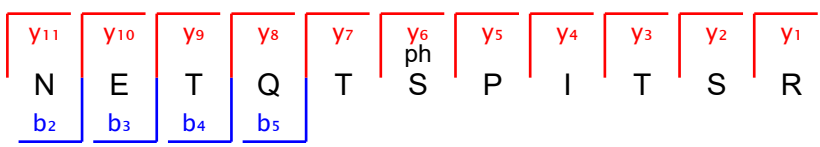



Raw file Scan Method Score m/z  
 sys\_15\_1 10313 FTMS; HCD 110.12 672.3

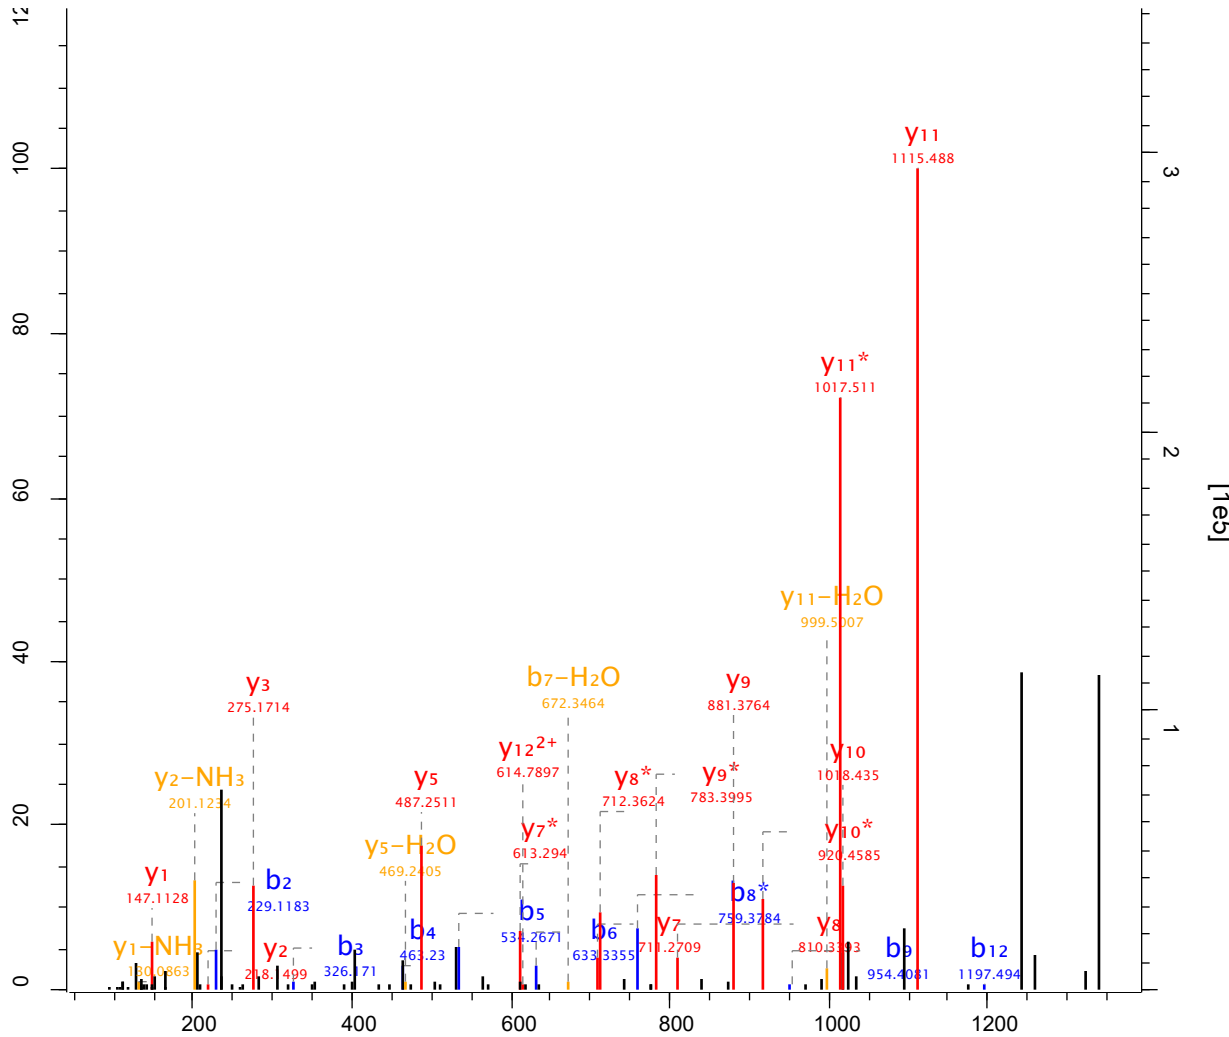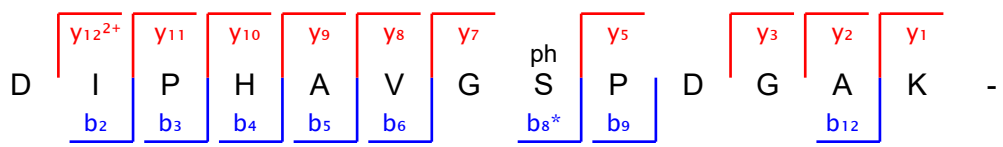



Raw file Scan Method Score m/z  
 sys\_15\_1 10314 FTMS; HCD 73.5 516.71

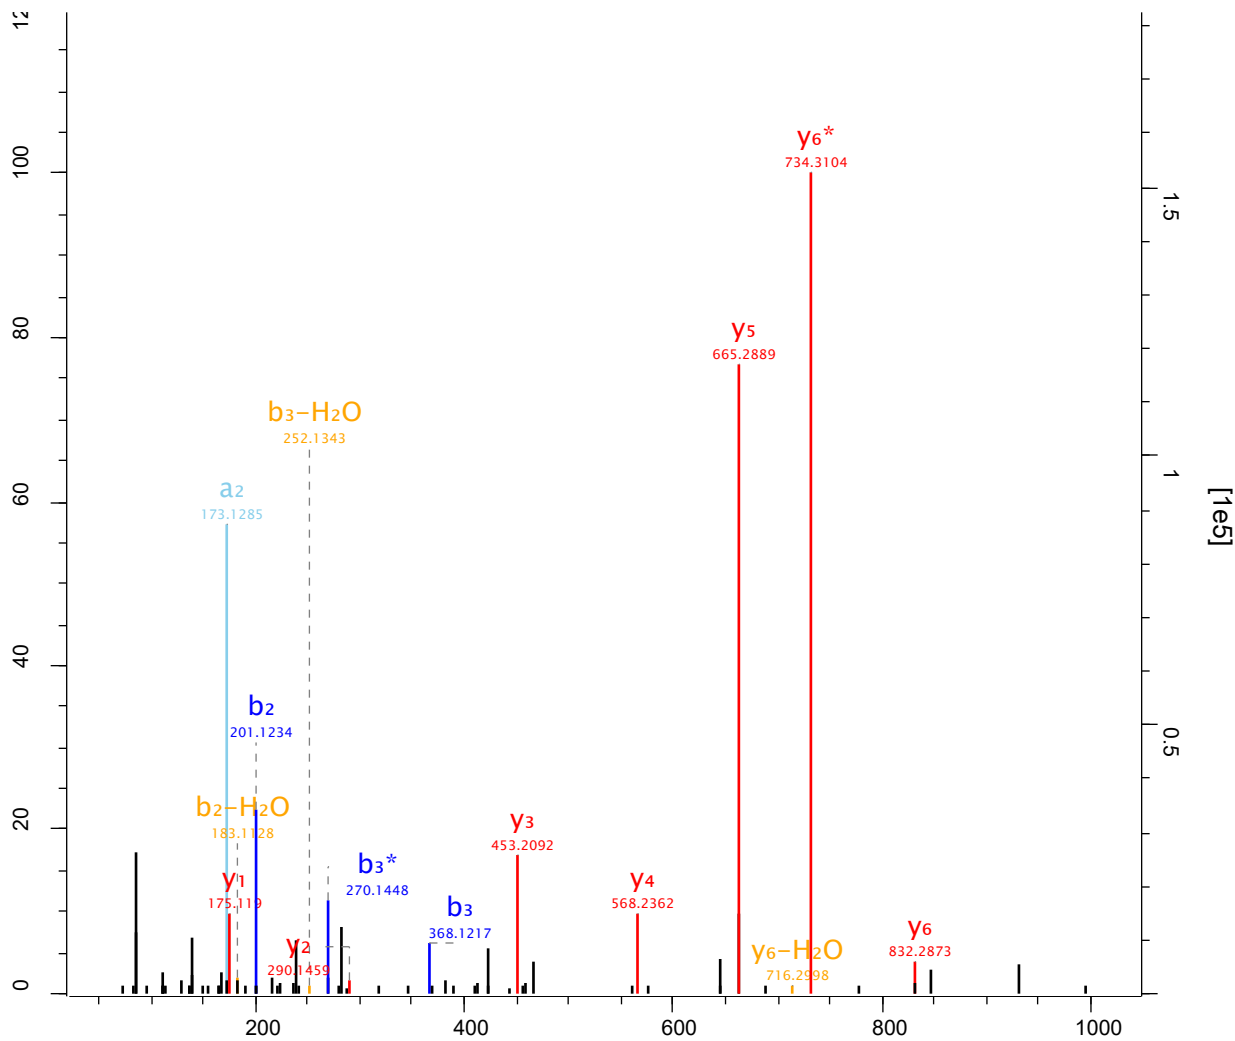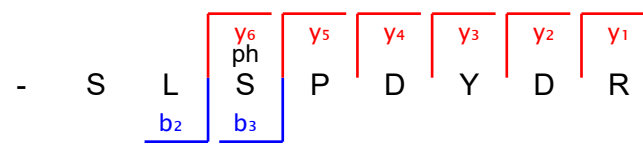

Raw file Scan Method Score m/z  
 sys\_15\_1 10355 FTMS; HCD 46.07 586.72

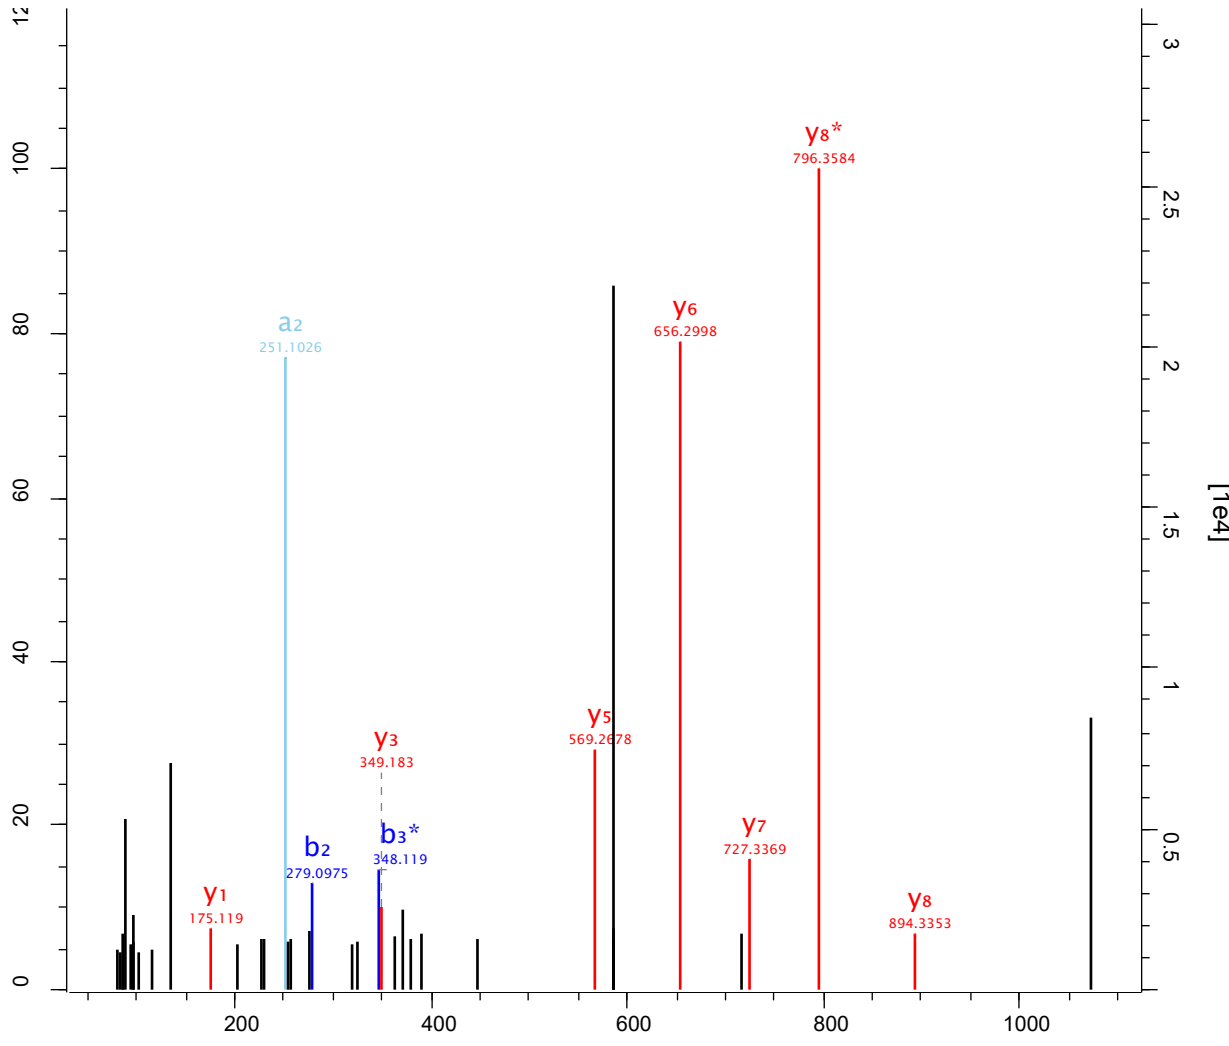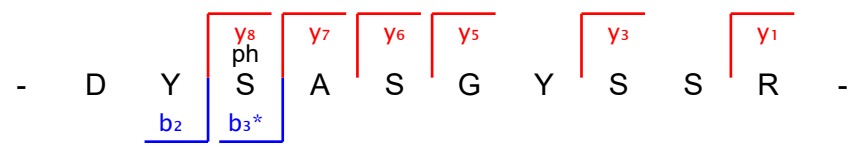

| Raw file | Scan  | Method    | Score | m/z    |
|----------|-------|-----------|-------|--------|
| sys_15_1 | 10454 | FTMS; HCD | 41.45 | 600.24 |

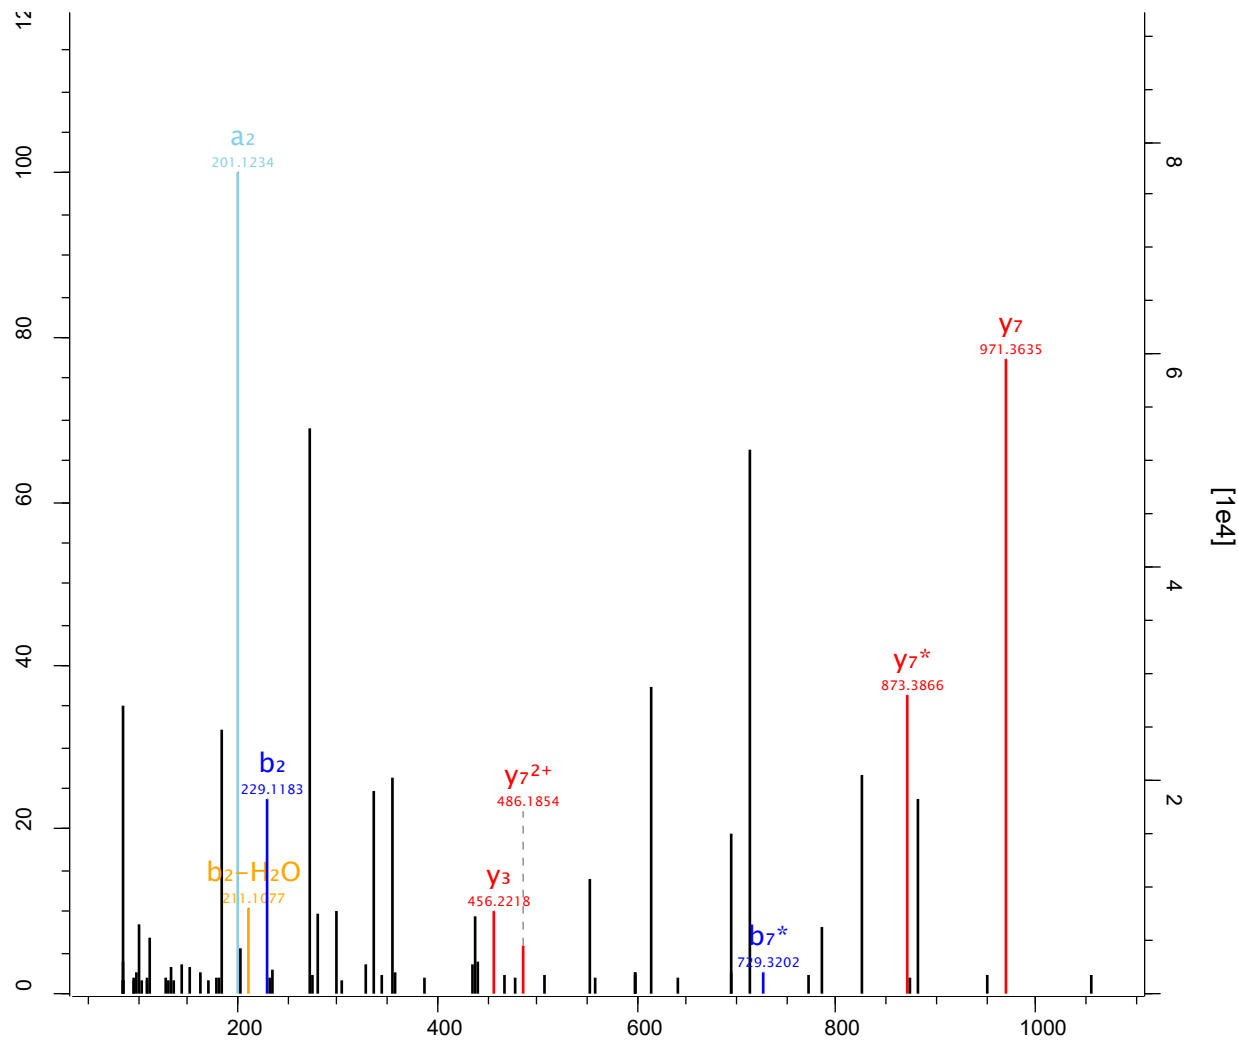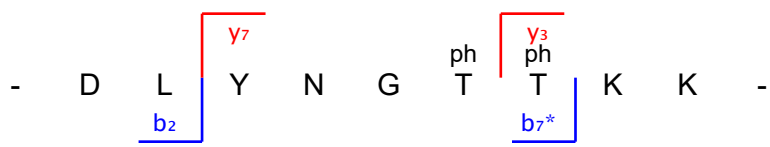

Raw file Scan Method Score m/z  
 sys\_15\_1 10480 FTMS; HCD 205.31 557.76

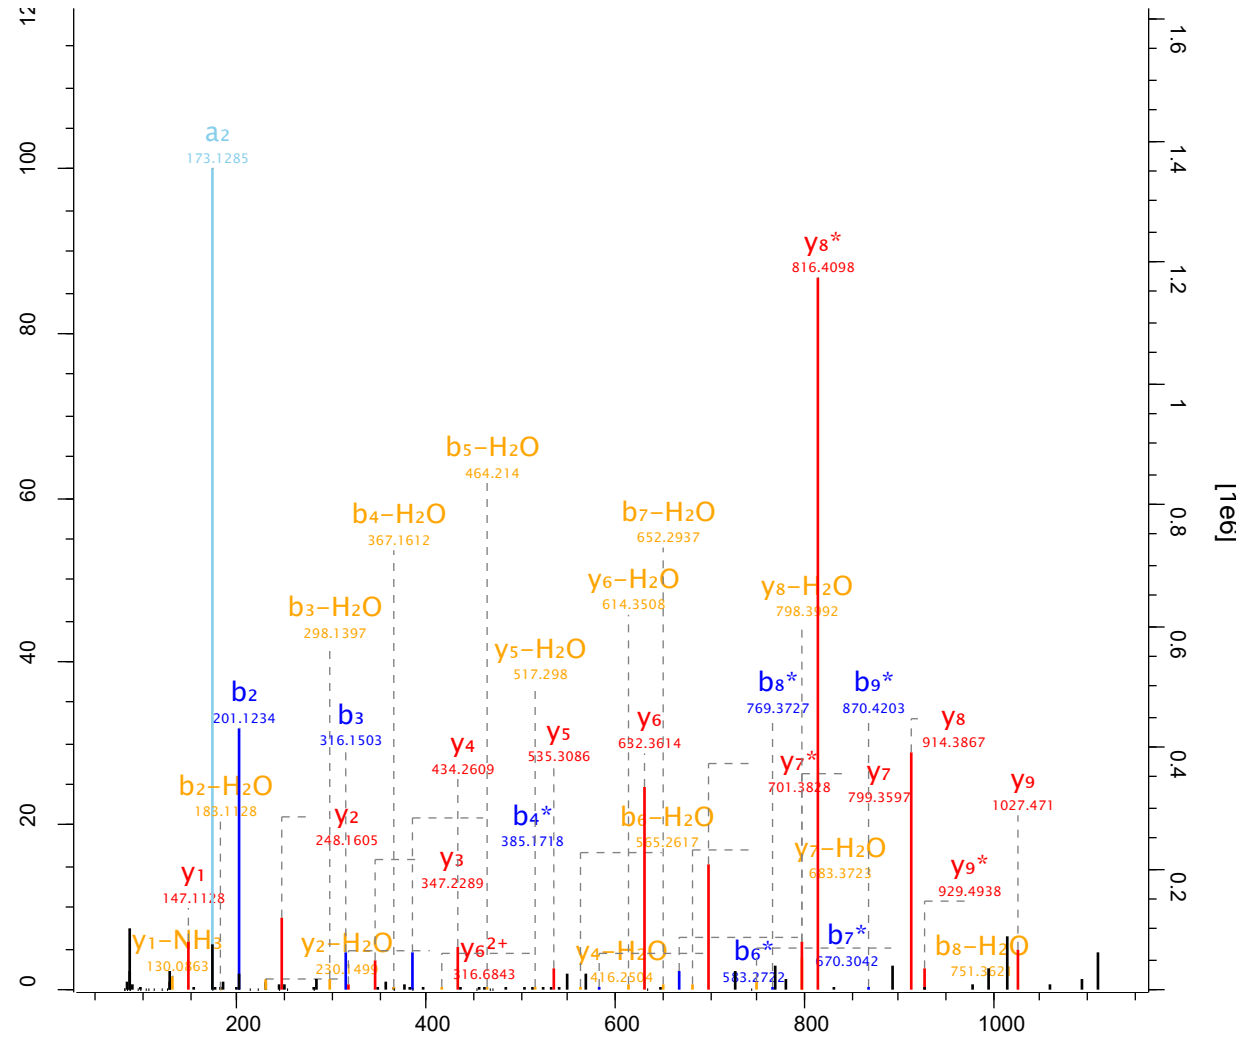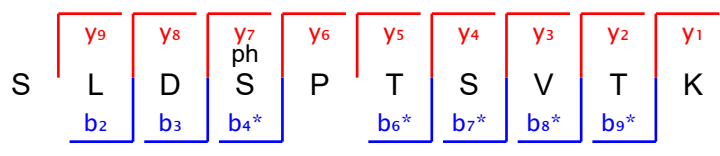

Raw file Scan Method Score m/z  
 sys\_15\_1 10614 FTMS; HCD 40.14 887.38

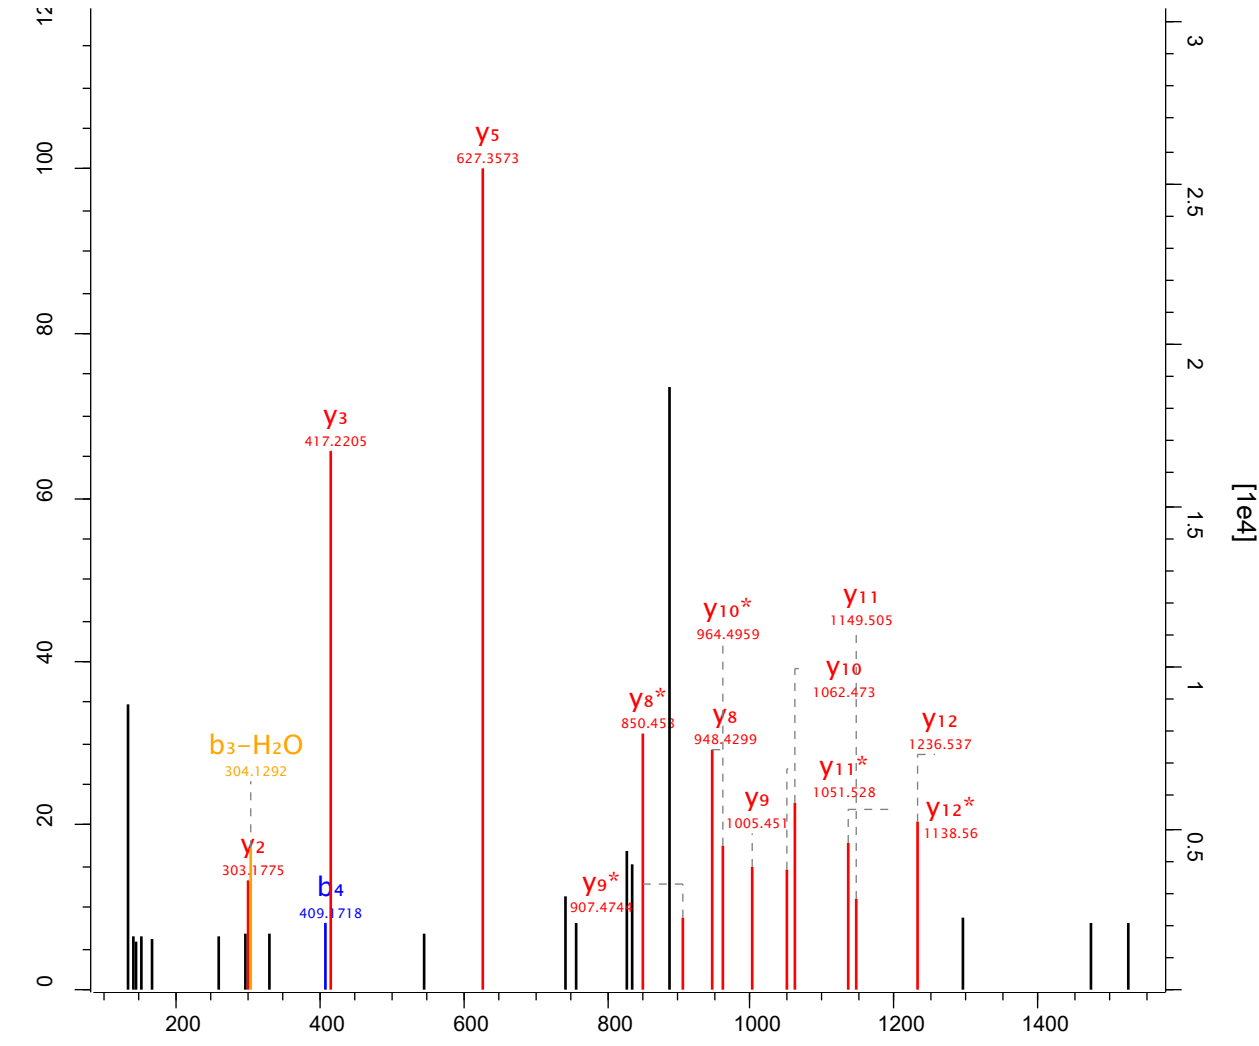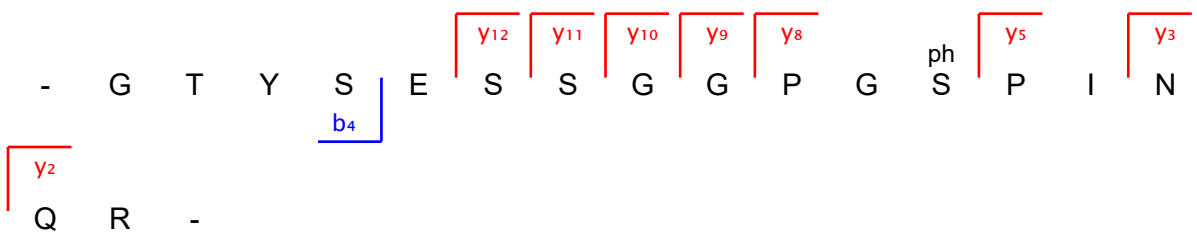

Raw file Scan Method Score m/z  
 sys\_15\_1 10712 FTMS; HCD 93.24 620.26

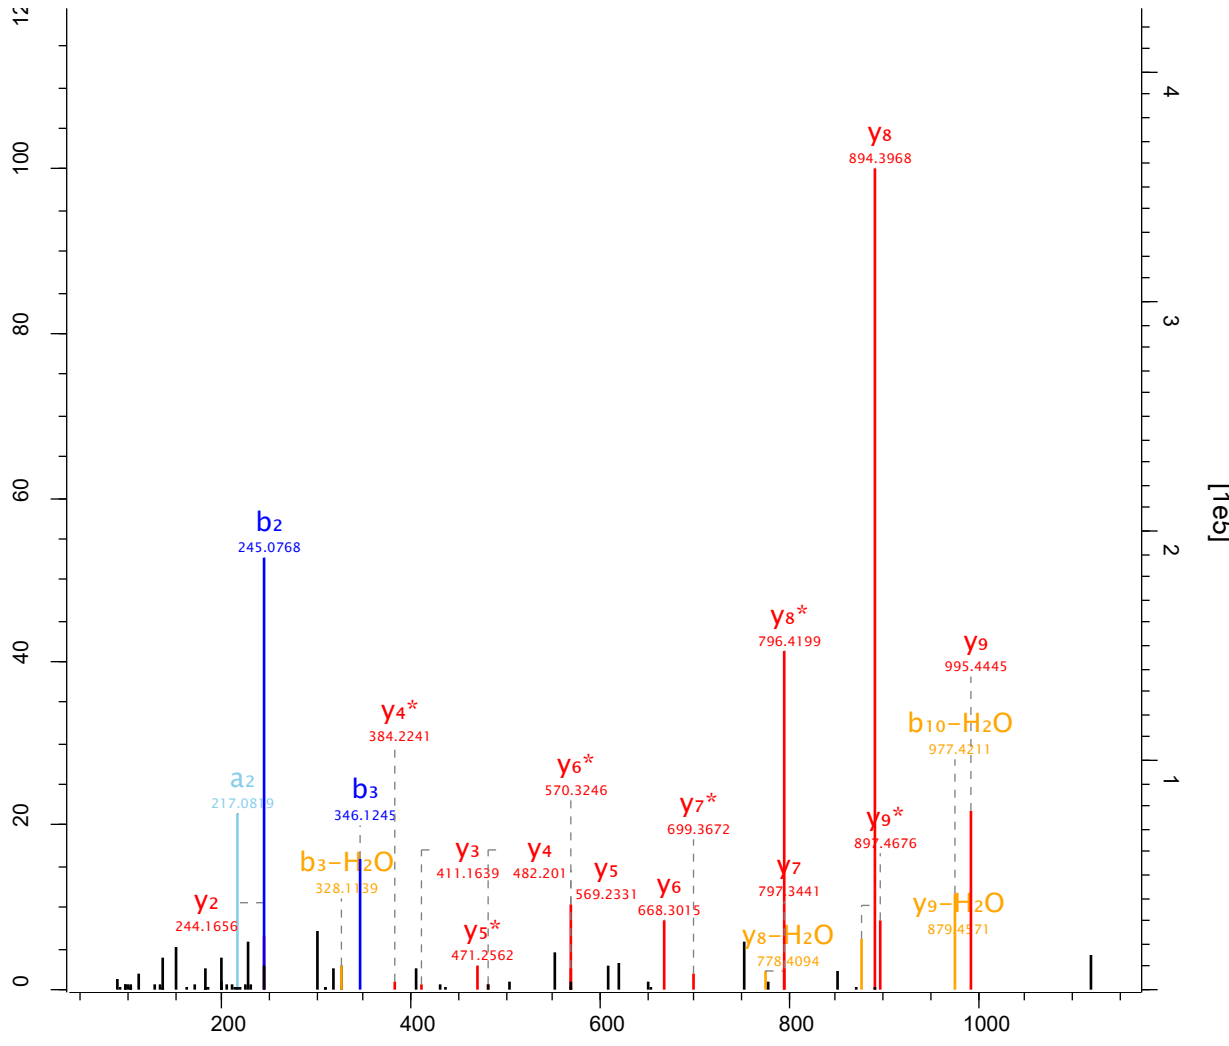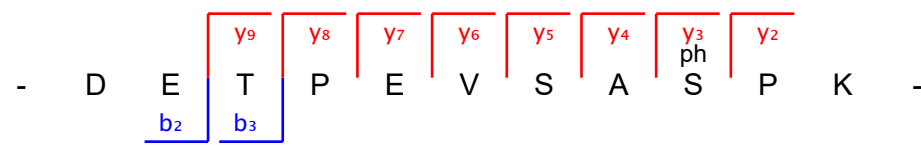

Raw file Scan Method Score m/z  
 sys\_15\_1 10777 FTMS; HCD 59.12 616.78

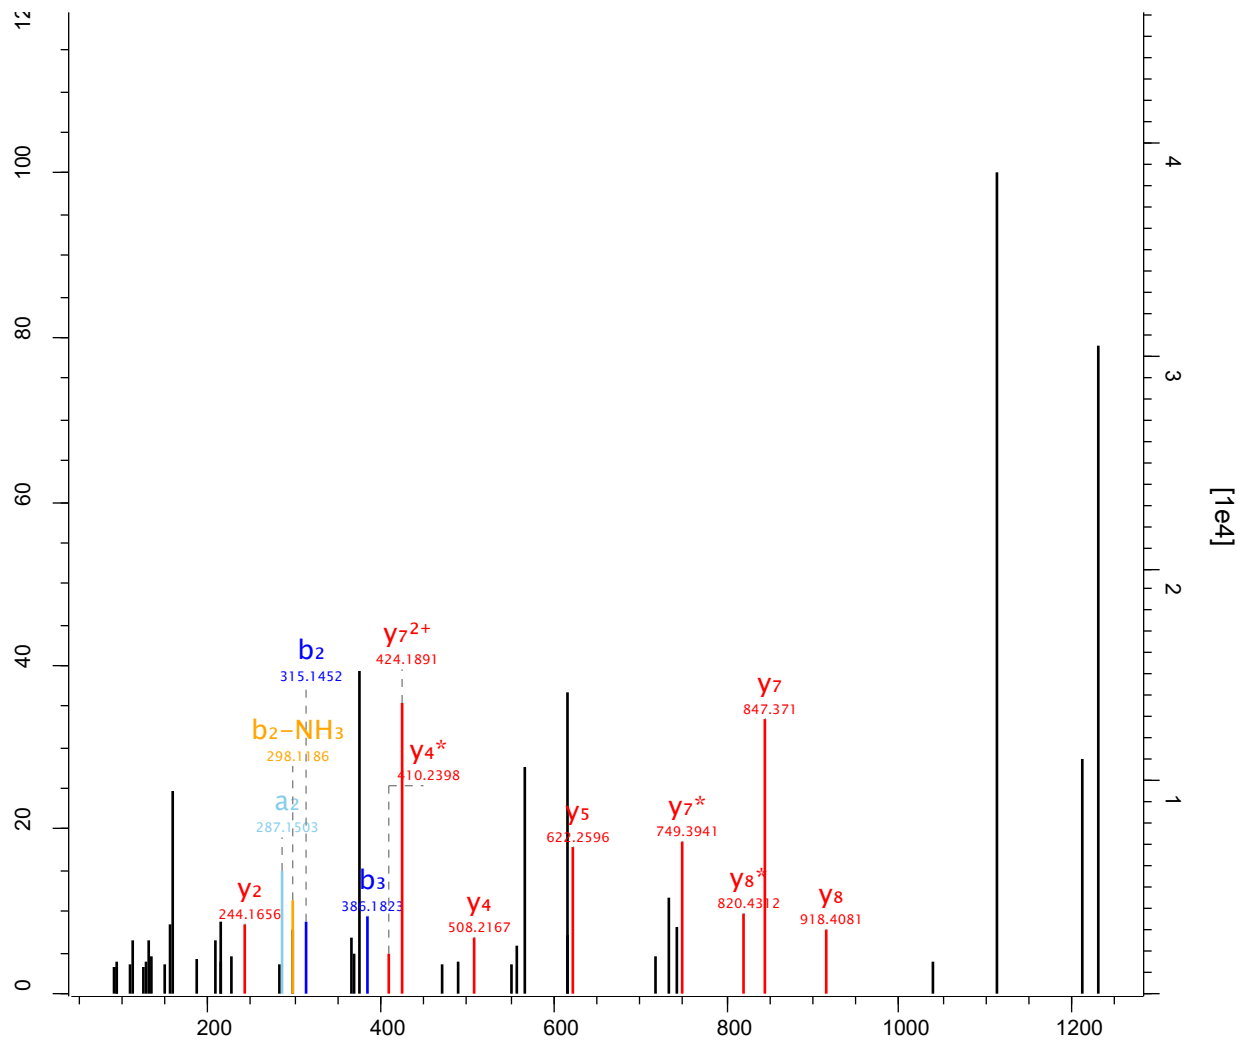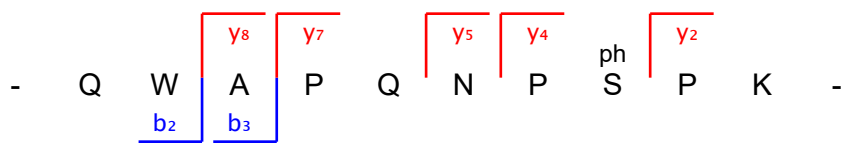

Raw file Scan Method Score m/z  
 sys\_15\_1 10780 FTMS; HCD 106.12 750.64

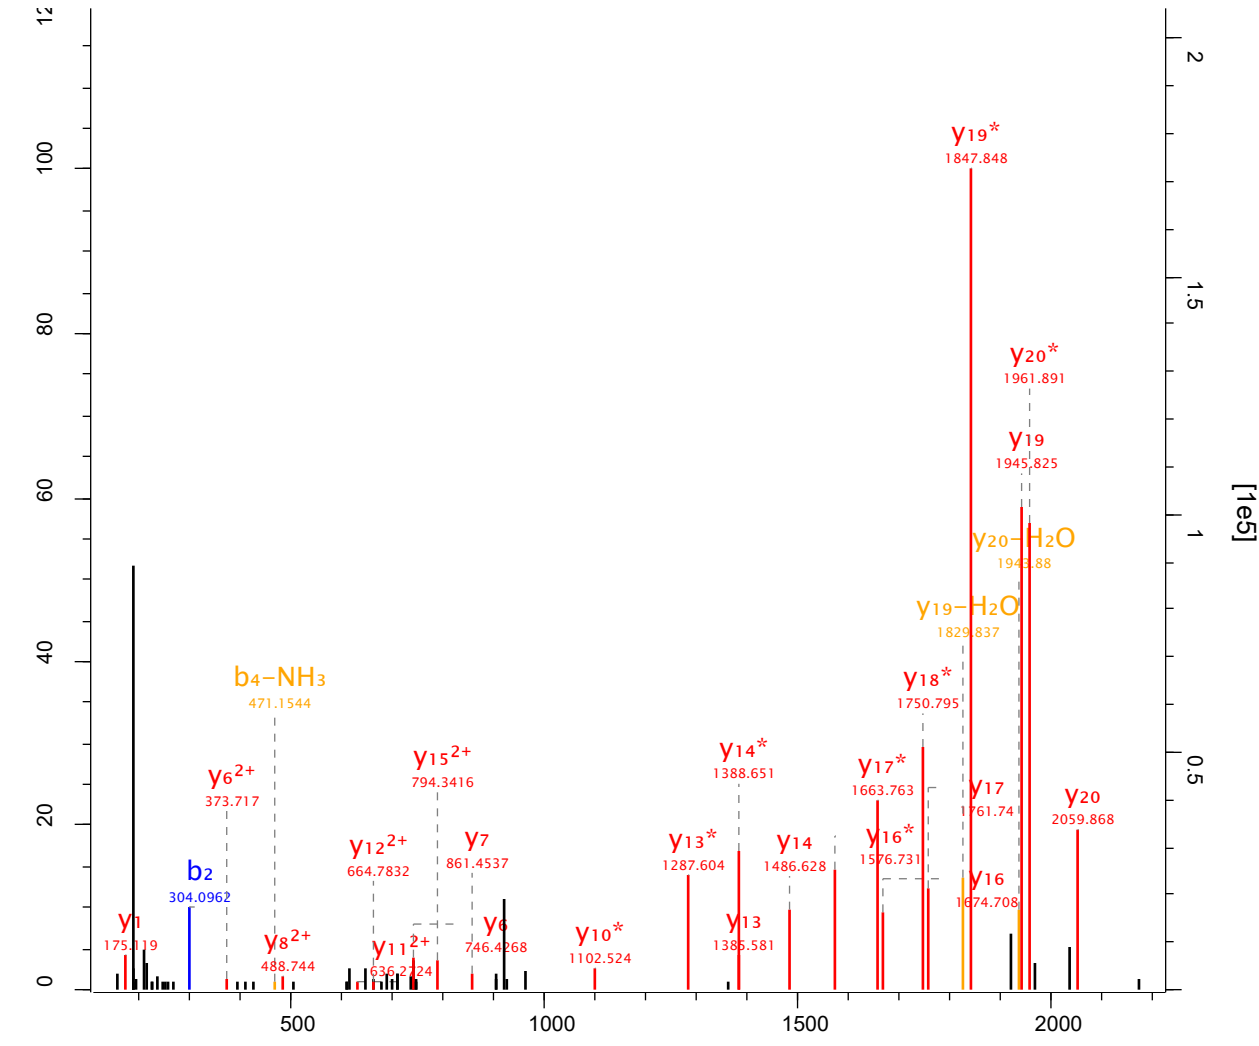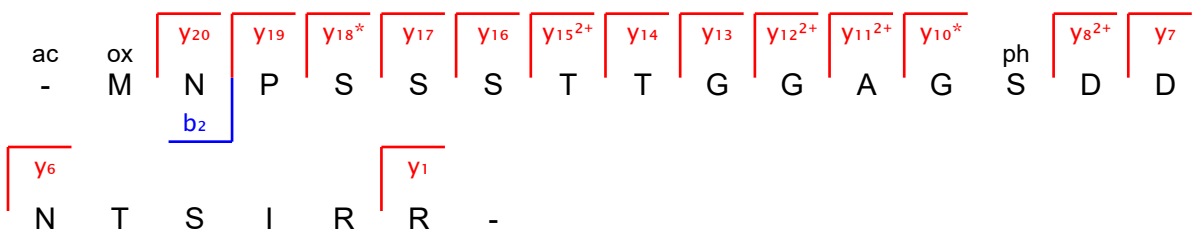



Raw file Scan Method Score m/z  
 sys\_15\_1 10830 FTMS; HCD 48.4 525.21

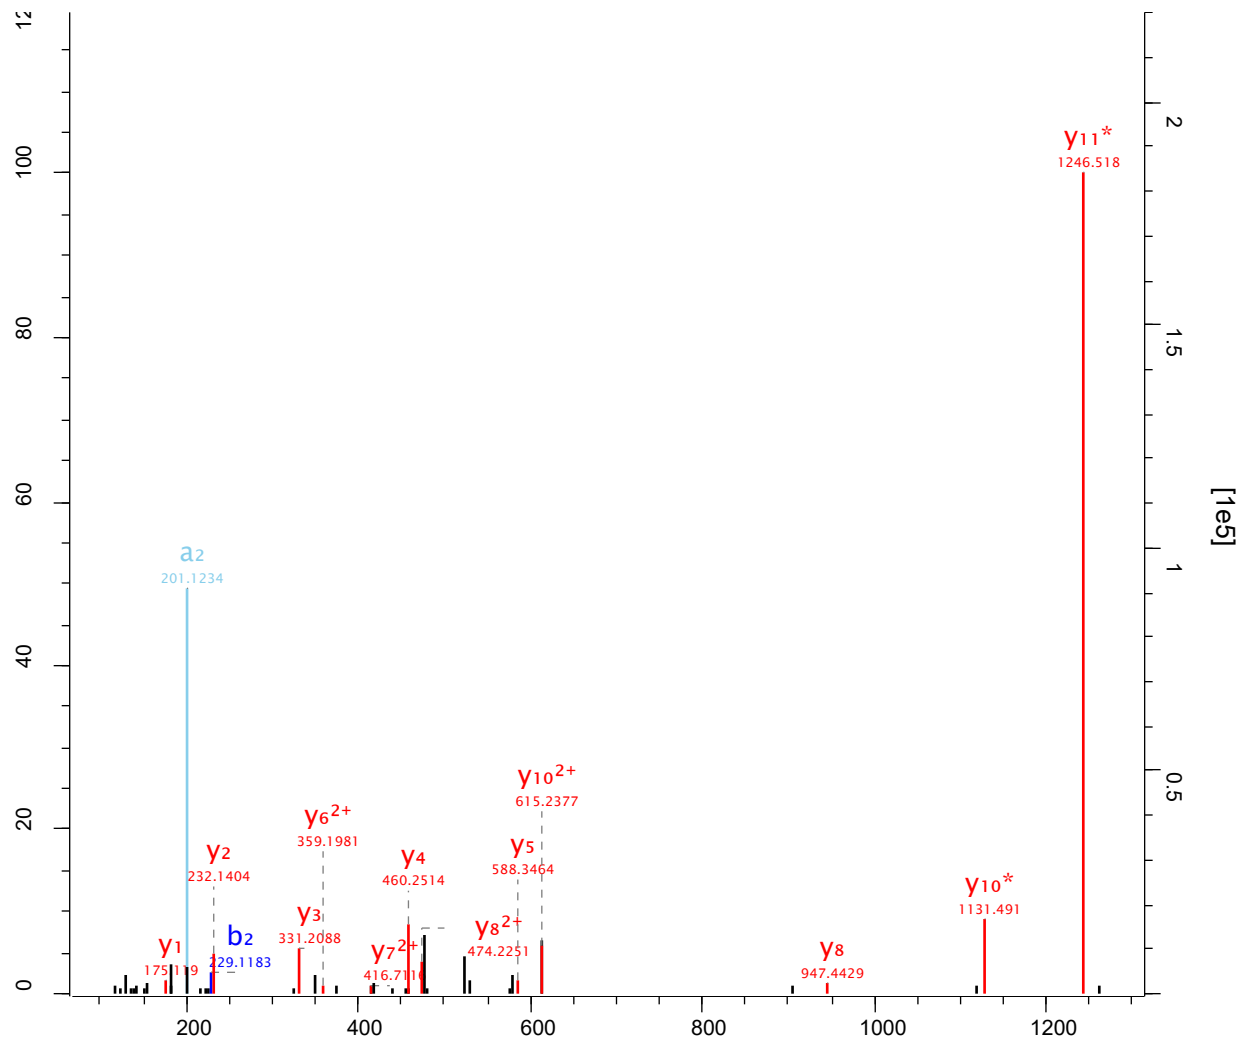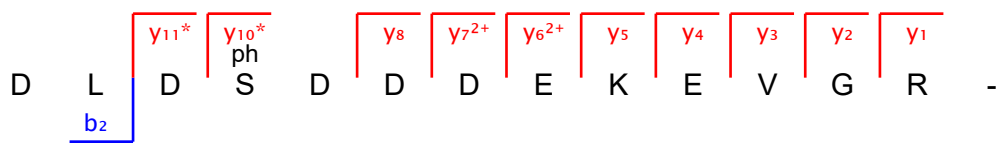

Raw file Scan Method Score m/z  
 sys\_15\_1 10865 FTMS; HCD 89.48 753.81

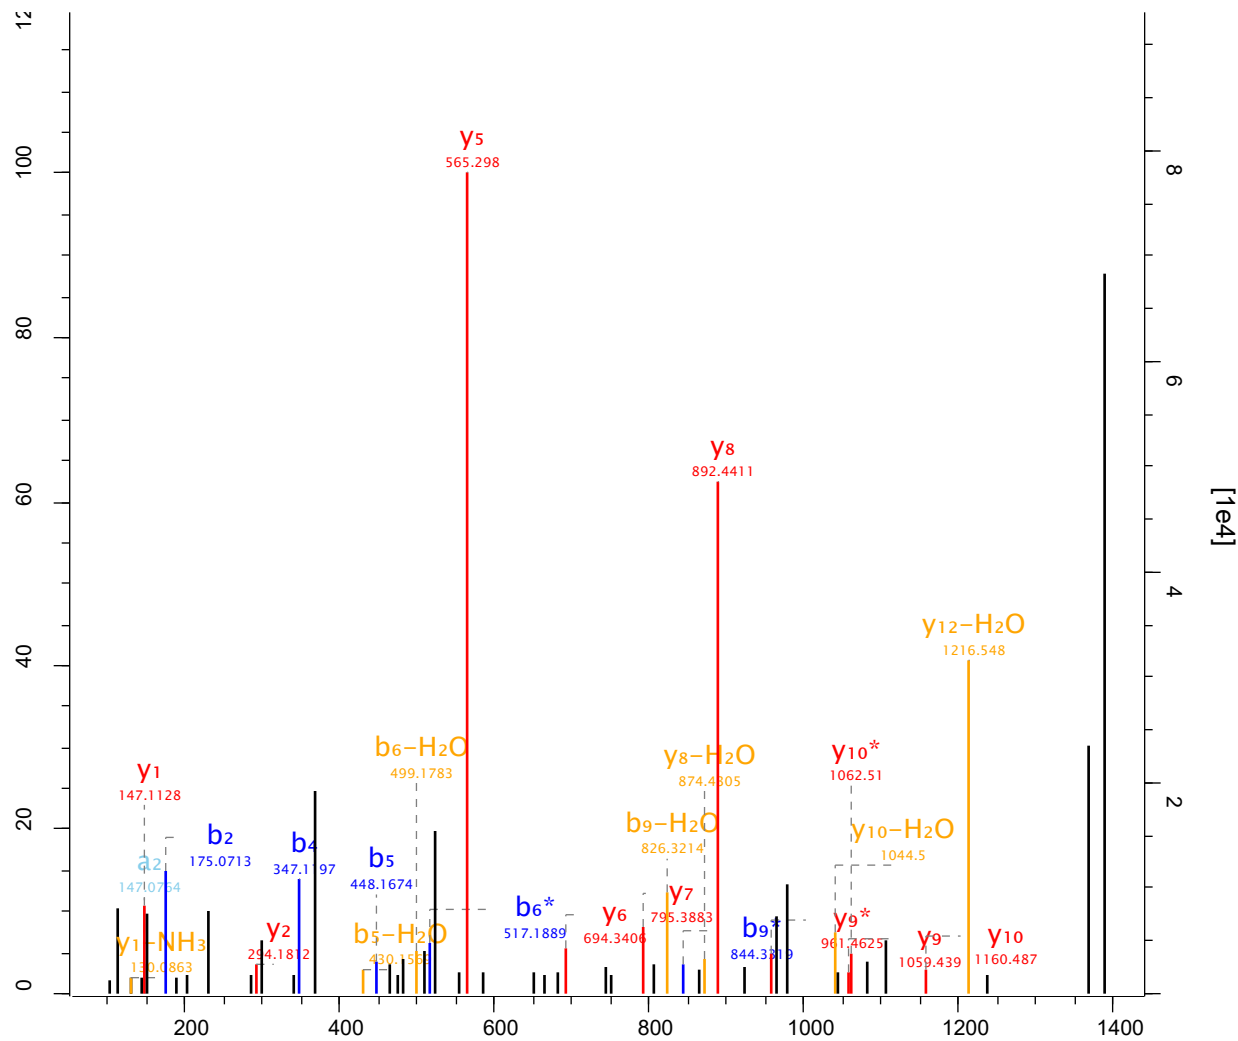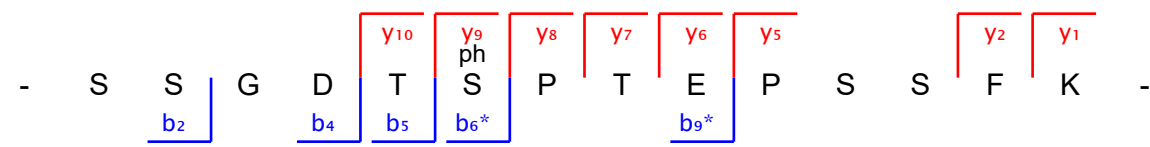

Raw file Scan Method Score m/z  
 sys\_15\_1 10870 FTMS; HCD 133.91 519.22

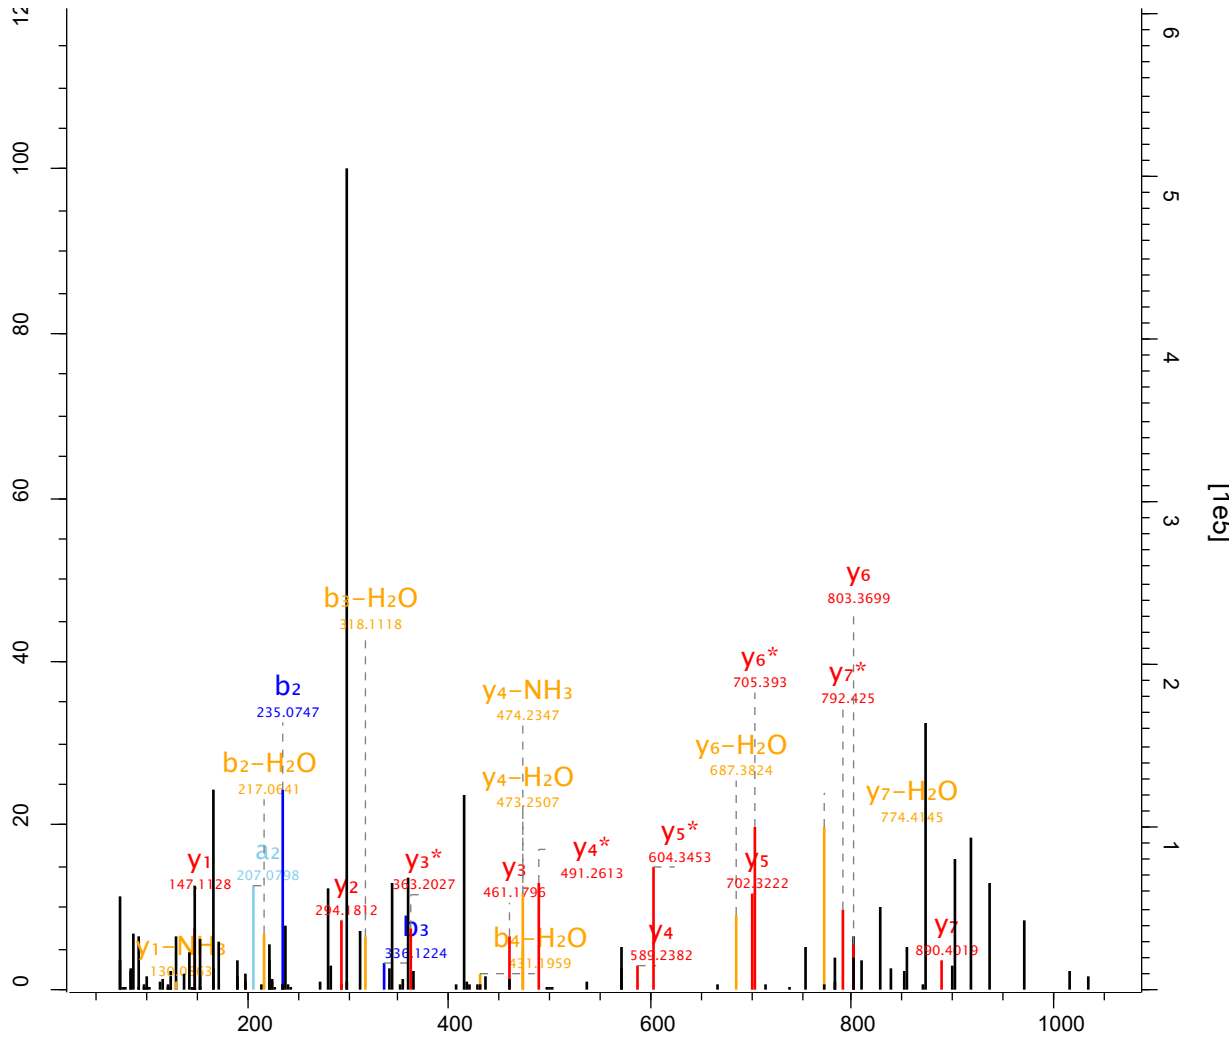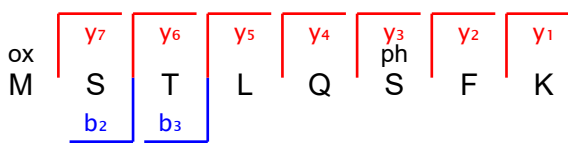

Raw file Scan Method Score m/z  
 sys\_15\_1 10878 FTMS; HCD 139.74 573.76

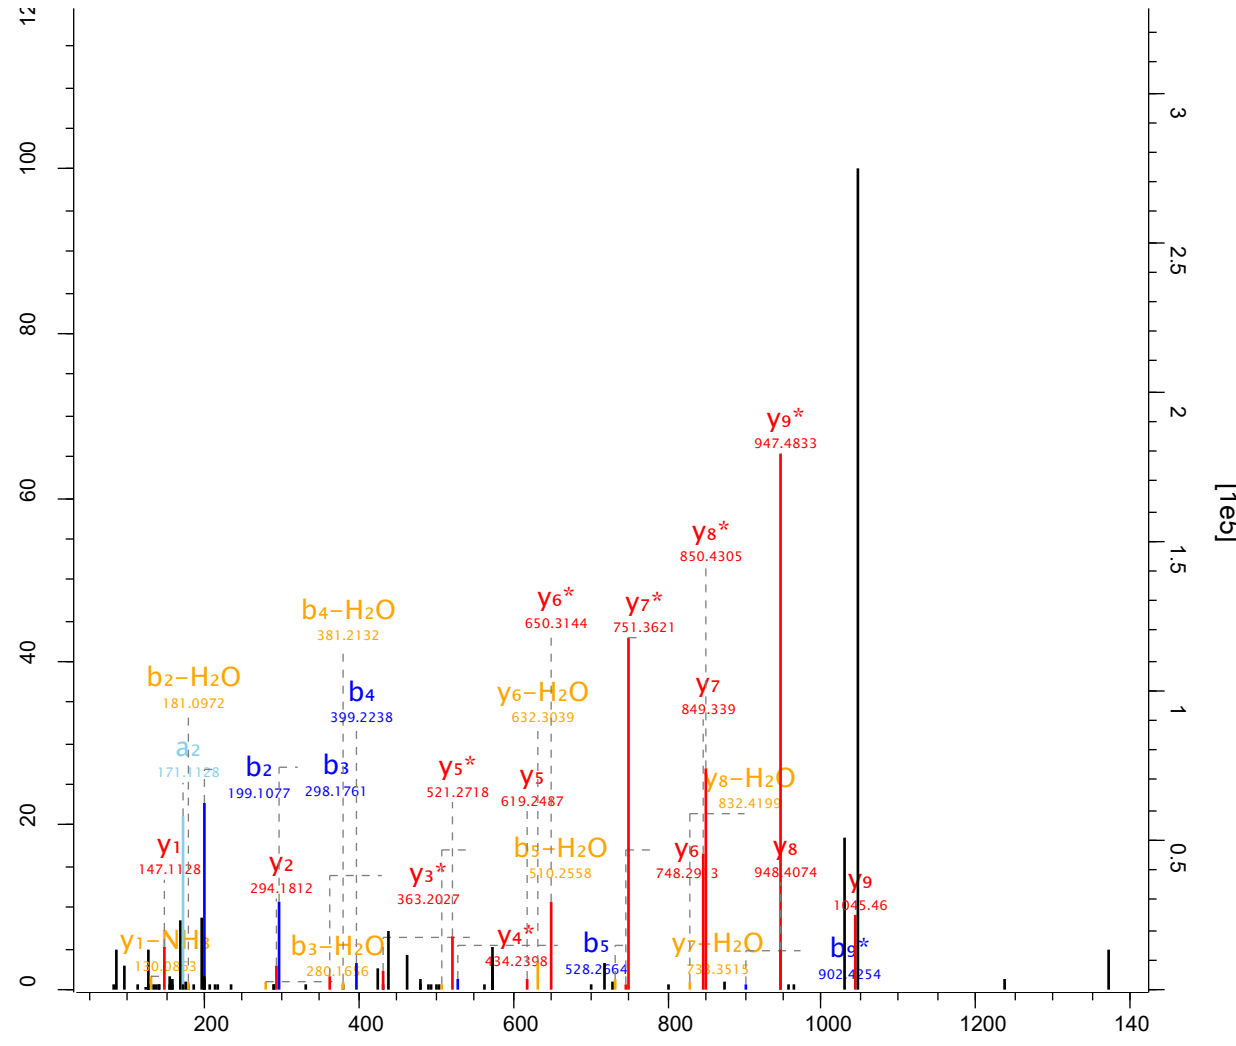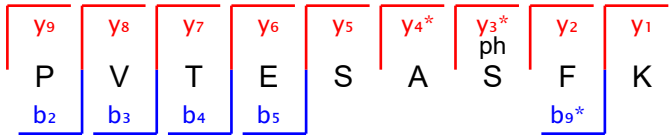

Raw file Scan Method Score m/z  
 sys\_15\_1 10949 FTMS; HCD 86.49 678.81

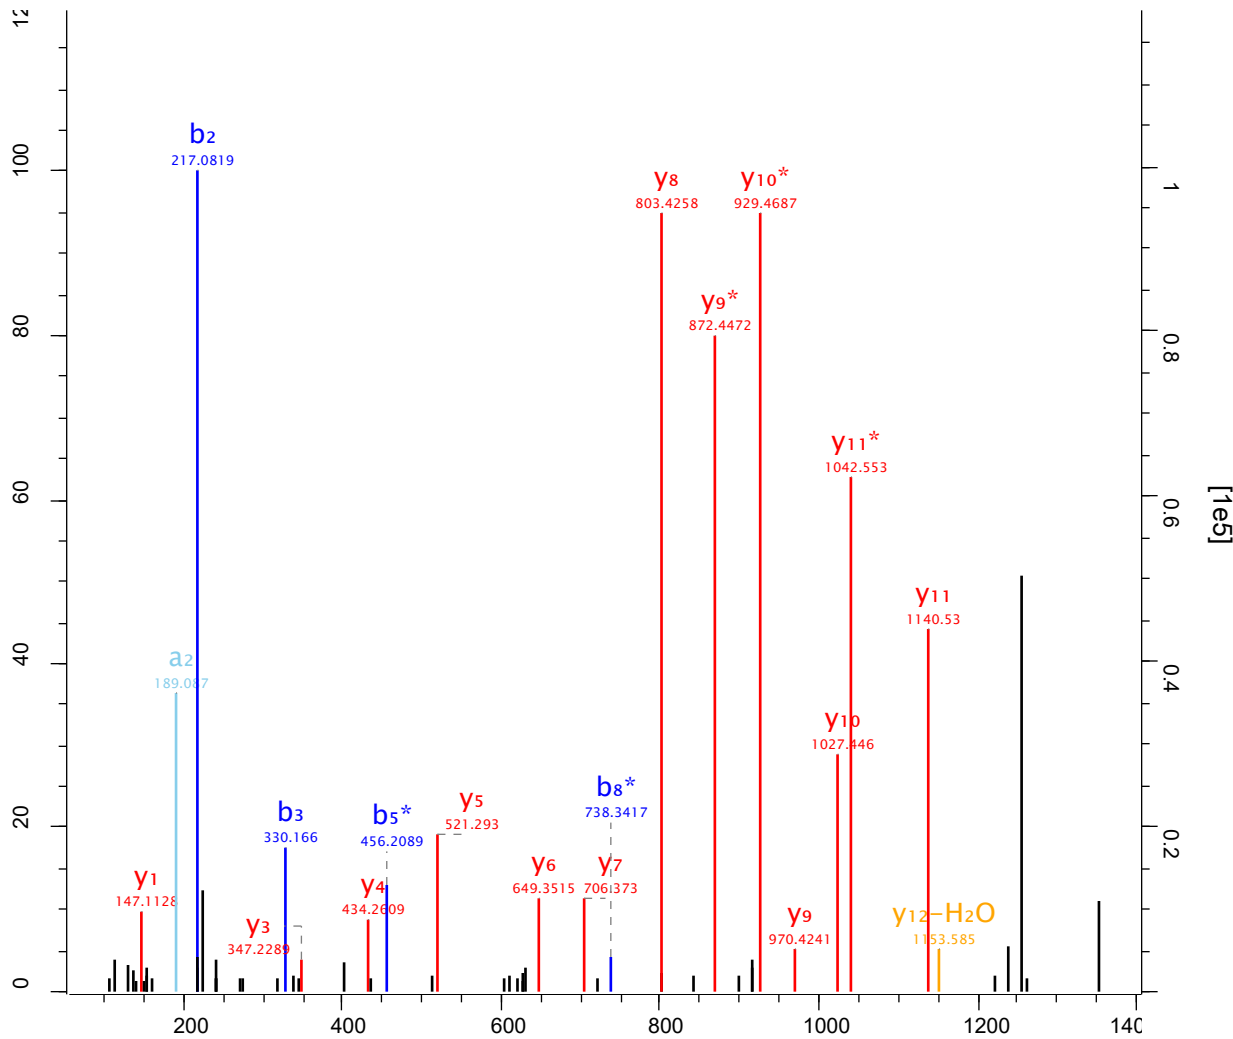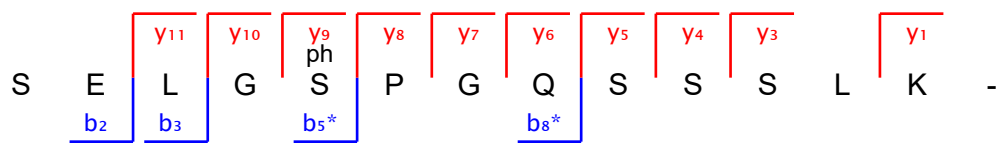

Raw file Scan Method Score m/z  
 sys\_15\_1 10962 FTMS; HCD 97.21 658.77

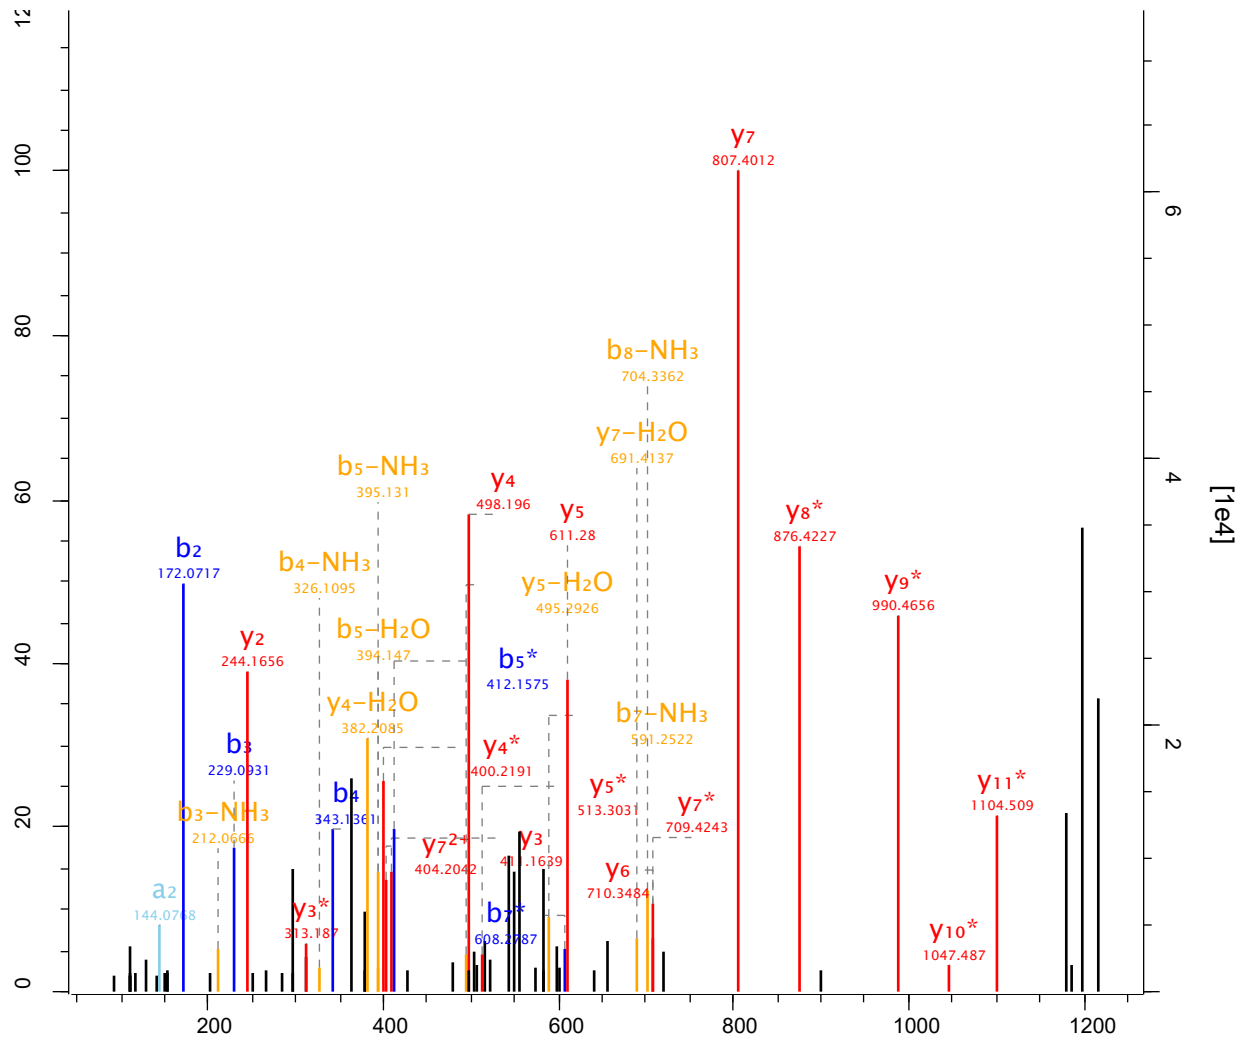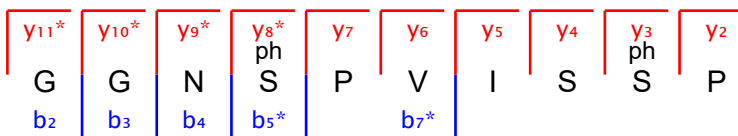

Raw file Scan Method Score m/z  
 sys\_15\_1 11046 FTMS; HCD 91.59 753.82

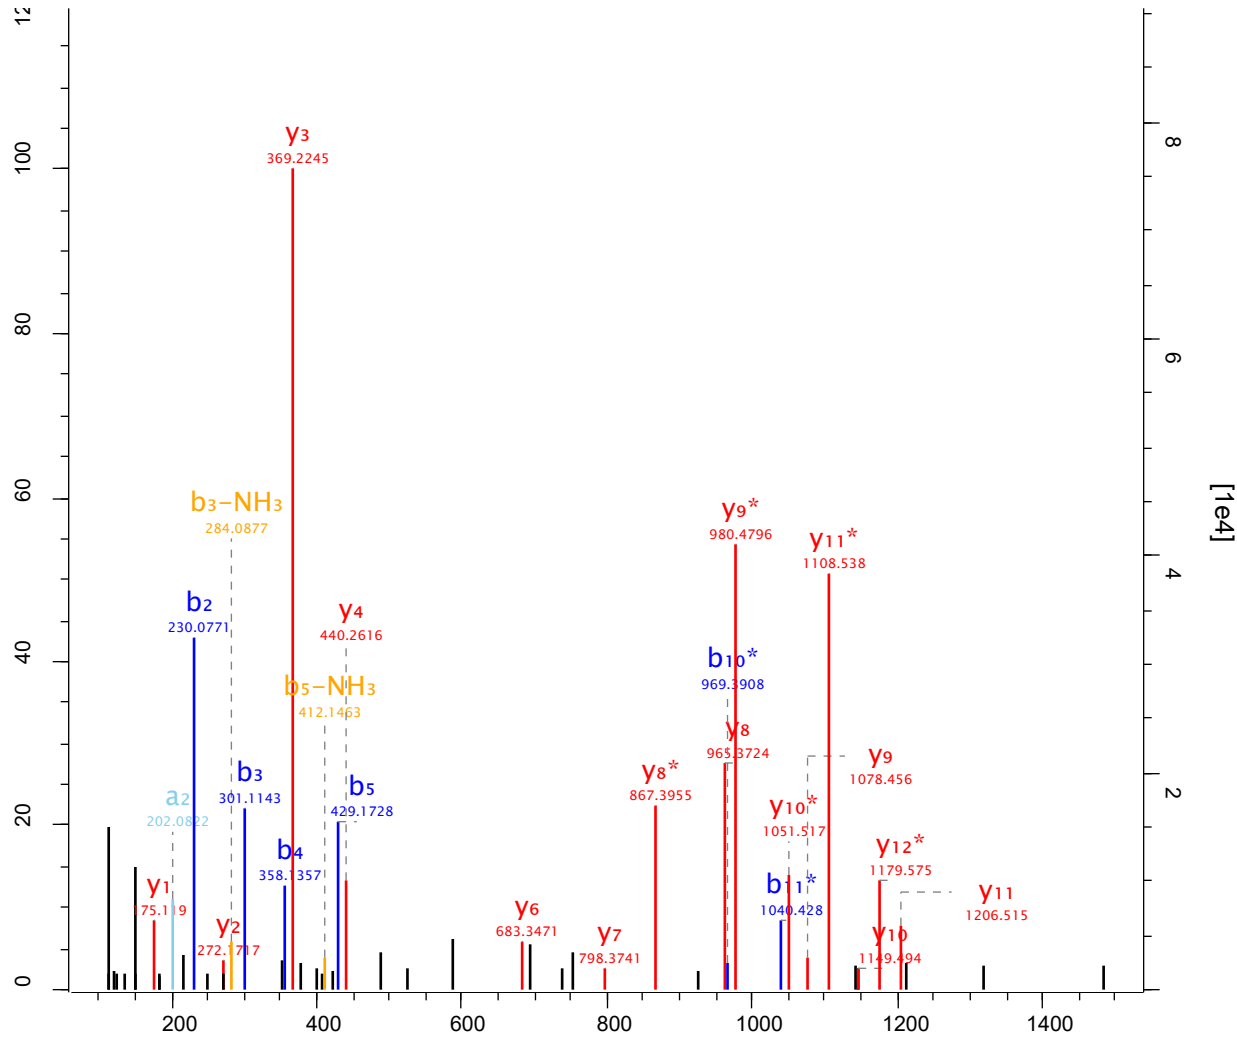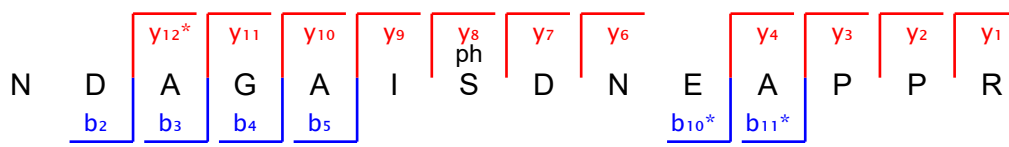

Raw file Scan Method Score m/z  
 sys\_15\_1 11068 FTMS; HCD 136.33 608.24

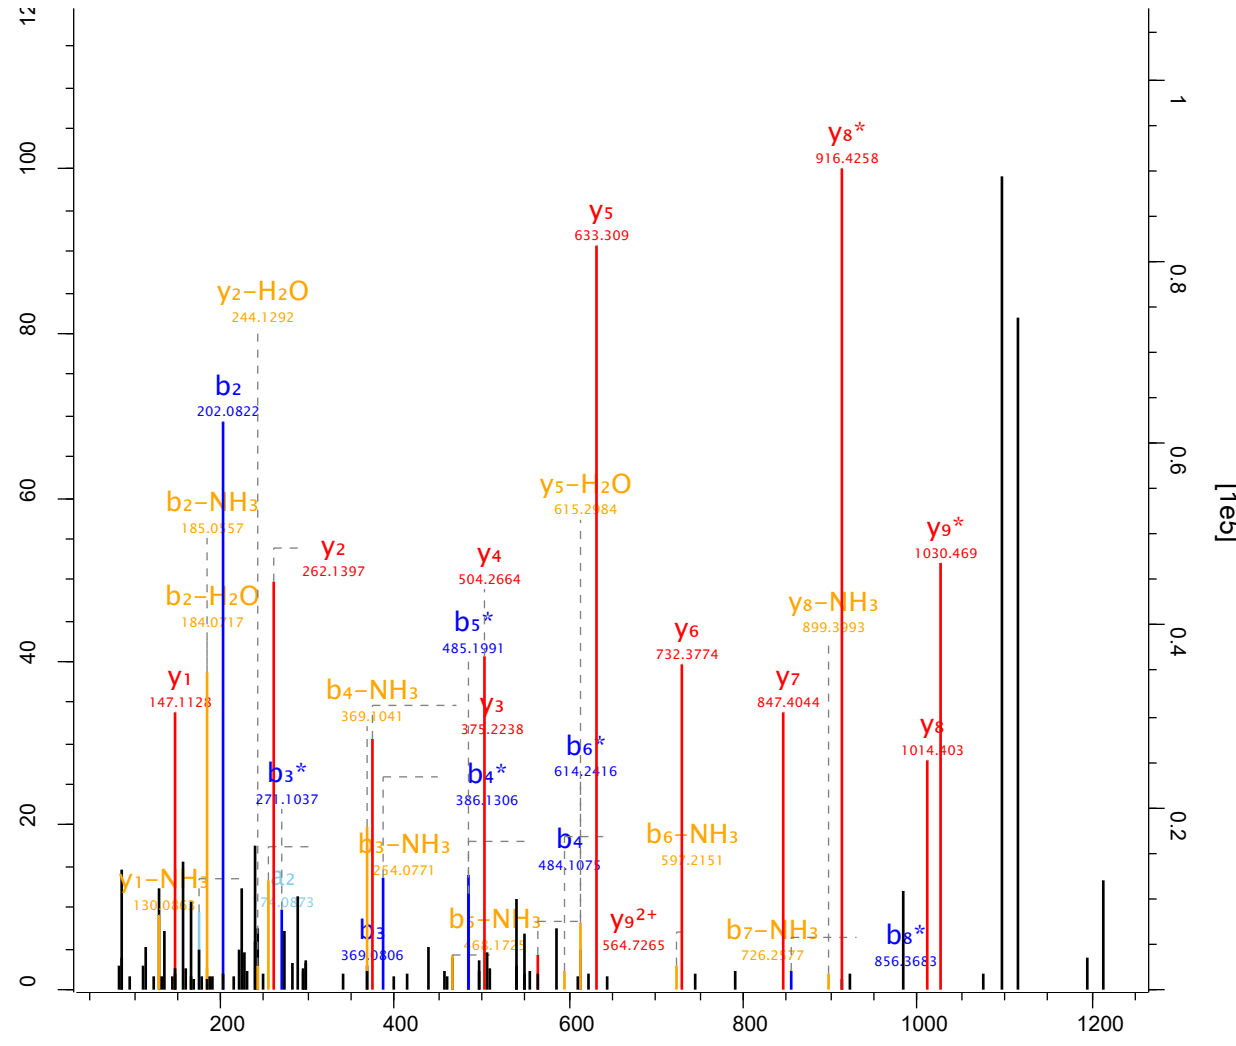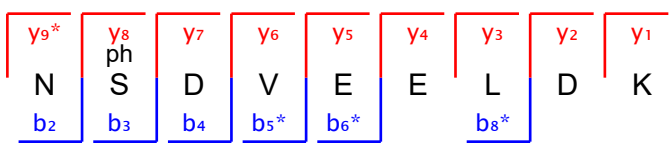



Raw file Scan Method Score m/z  
 sys\_15\_1 11078 FTMS; HCD 98.06 556.24

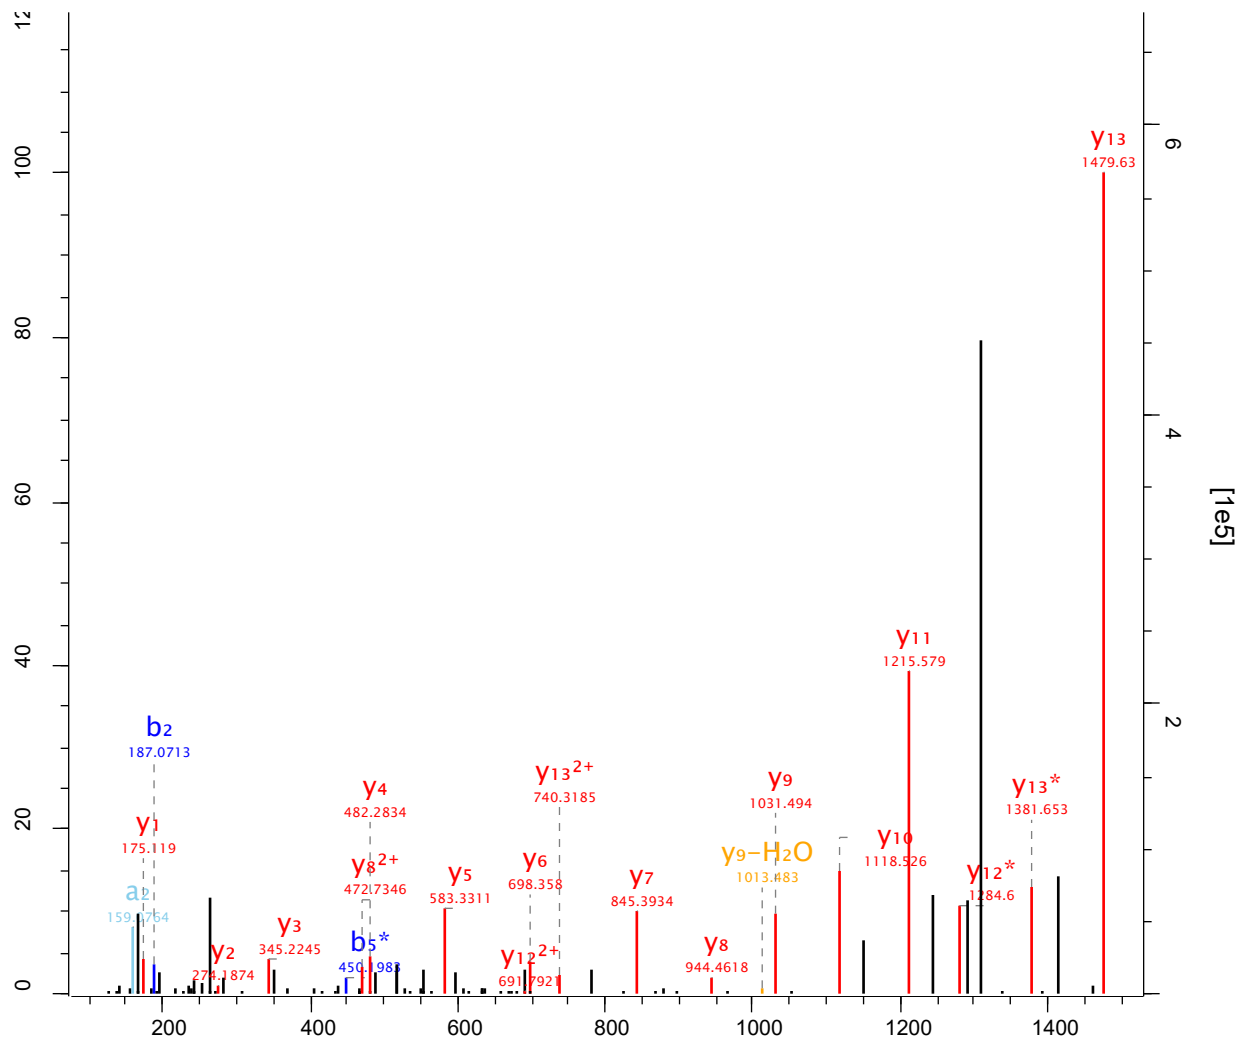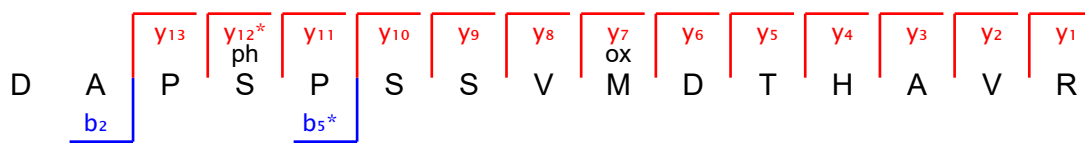

Raw file Scan Method Score m/z  
 sys\_15\_1 11081 FTMS; HCD 186.56 681.81

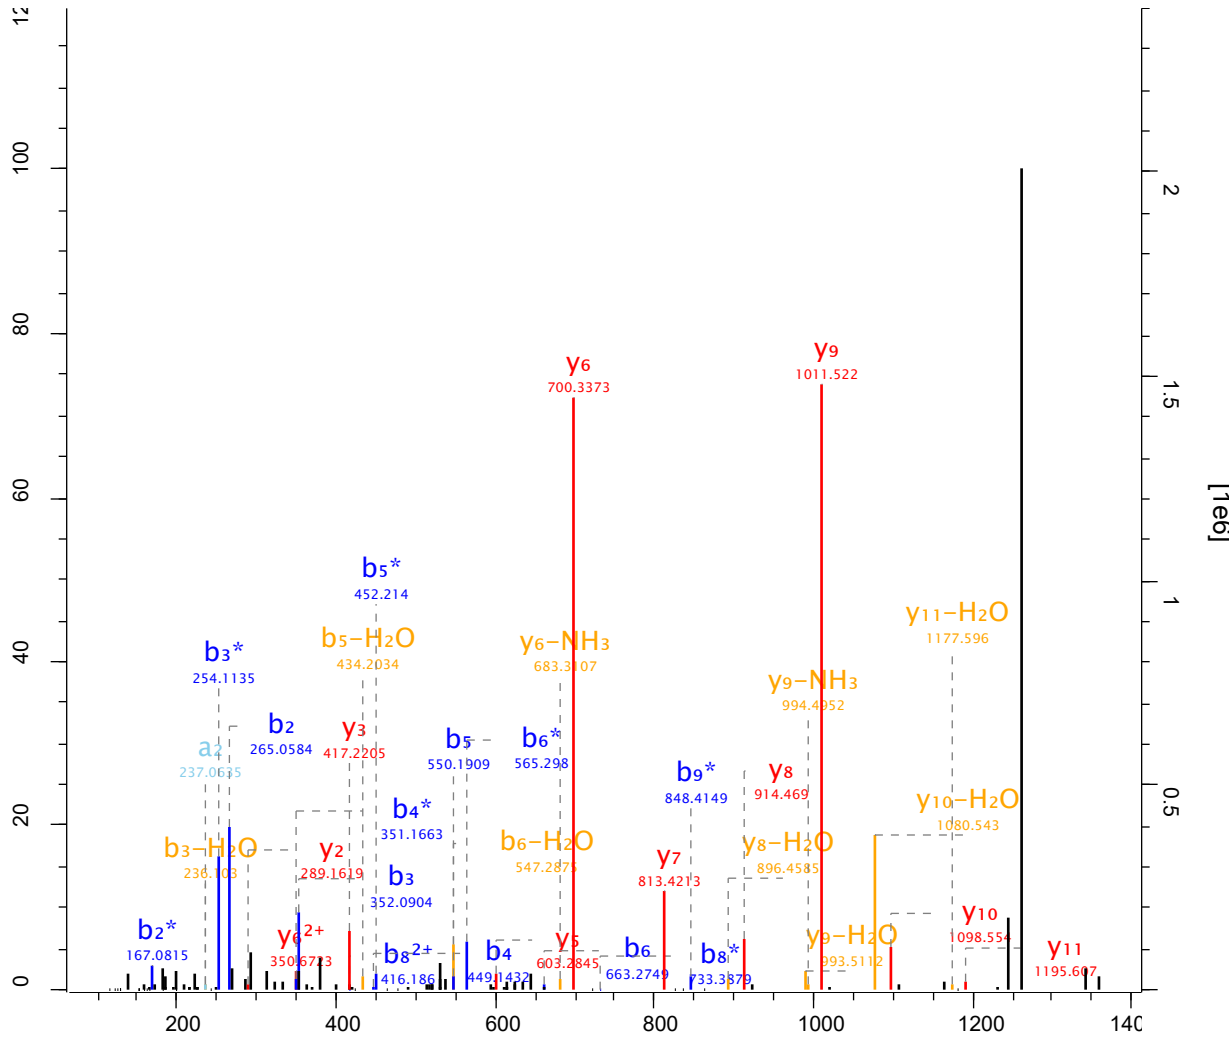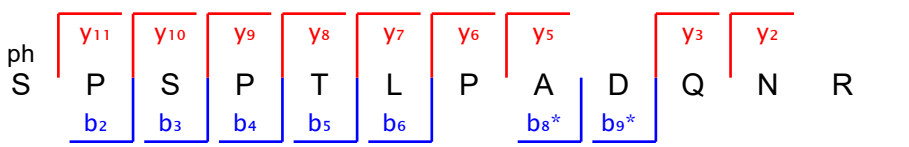

Raw file Scan Method Score m/z  
 sys\_15\_1 11082 FTMS; HCD 78.9 720.33

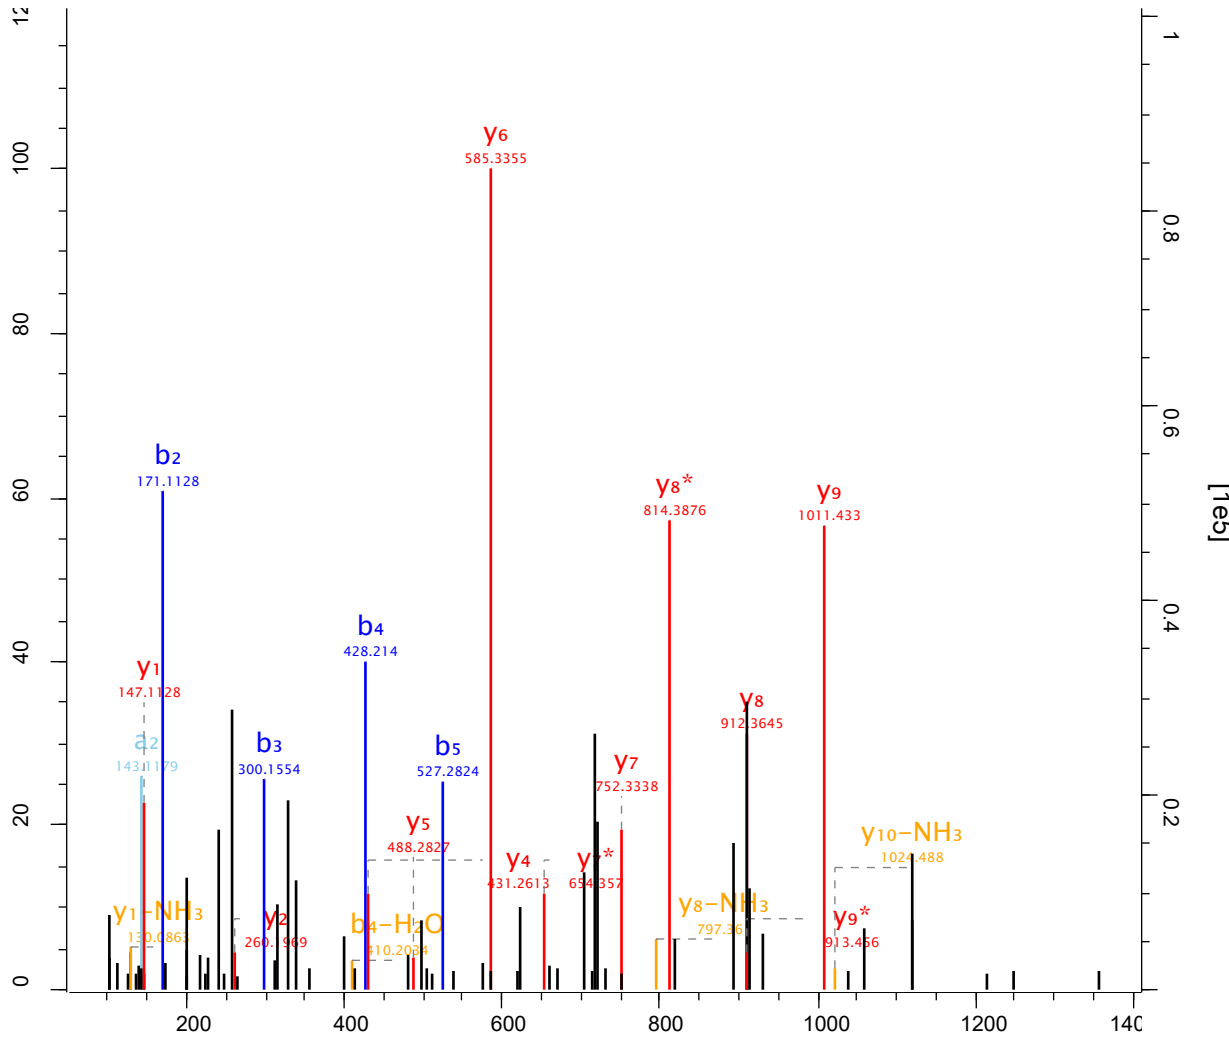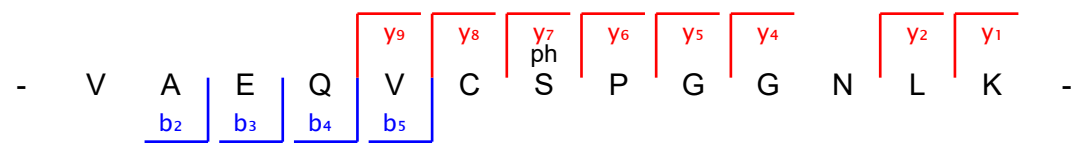

Raw file Scan Method Score m/z  
 sys\_15\_1 11115 FTMS; HCD 58.78 495.22

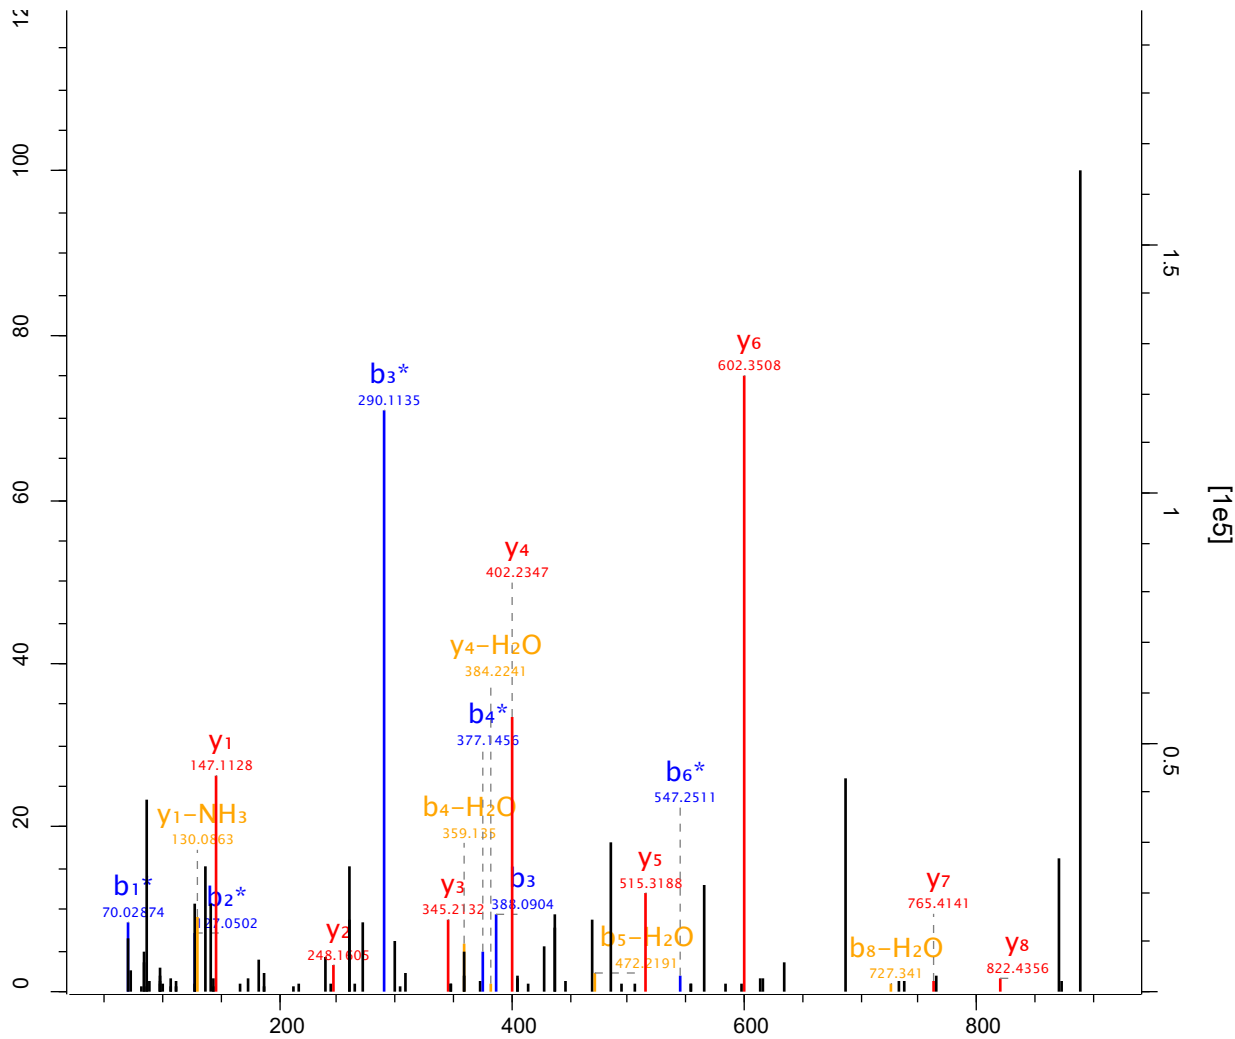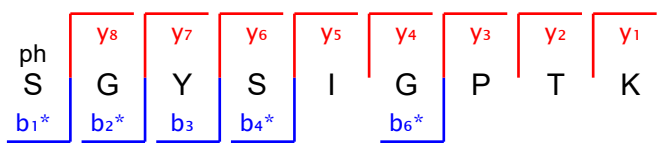

Raw file Scan Method Score m/z  
 sys\_15\_1 11218 FTMS; HCD 89.23 650.27

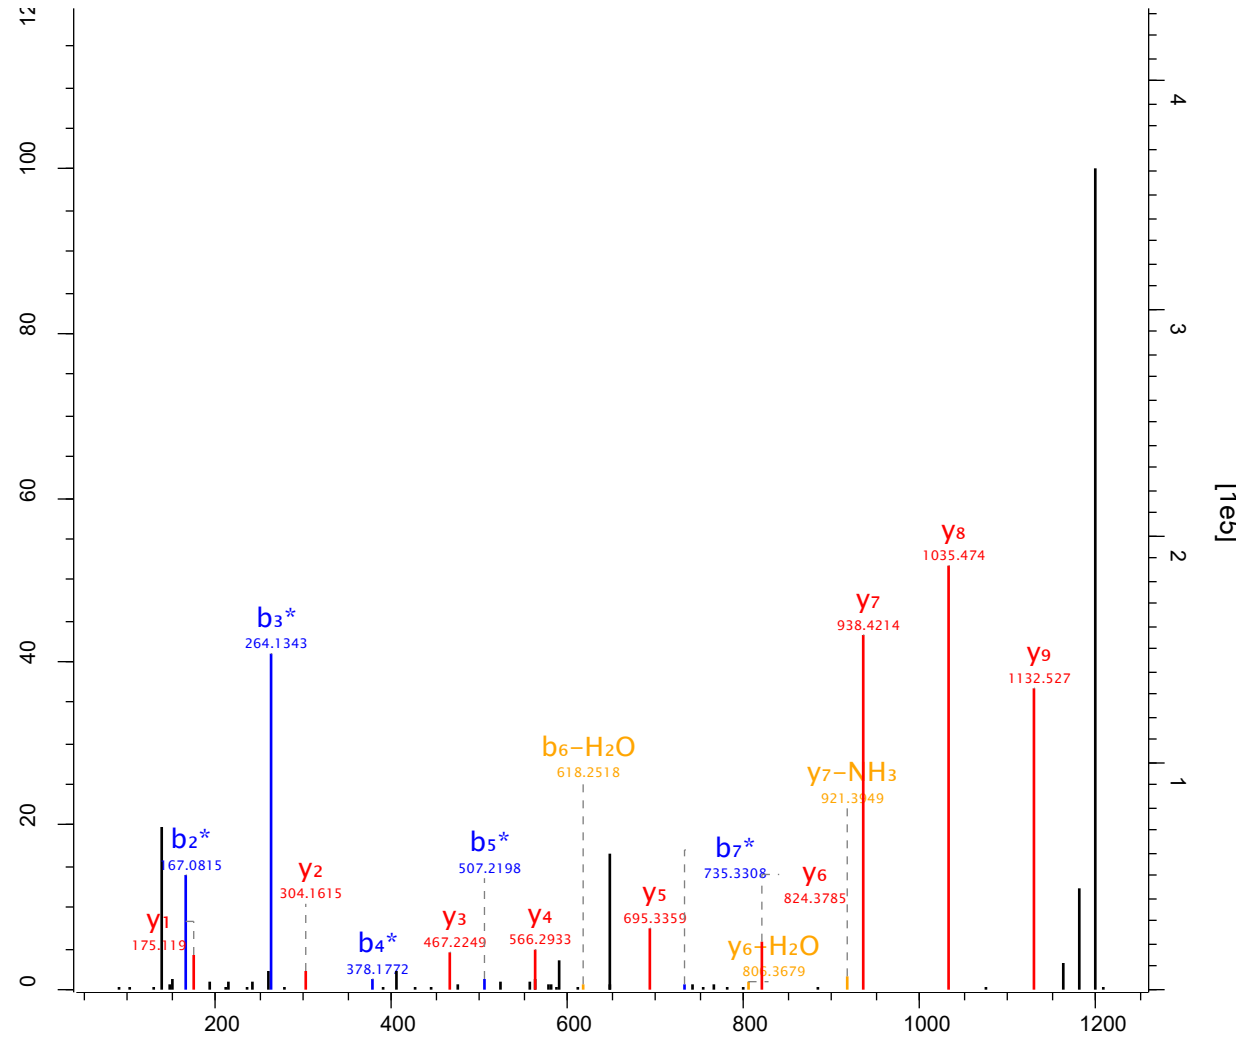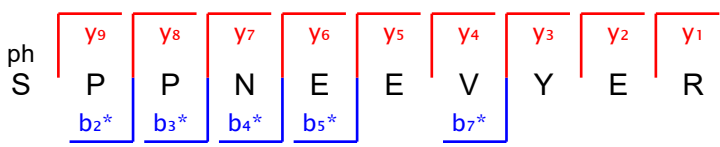

Raw file Scan Method Score m/z  
 sys\_15\_1 11314 FTMS; HCD 93.35 575.74

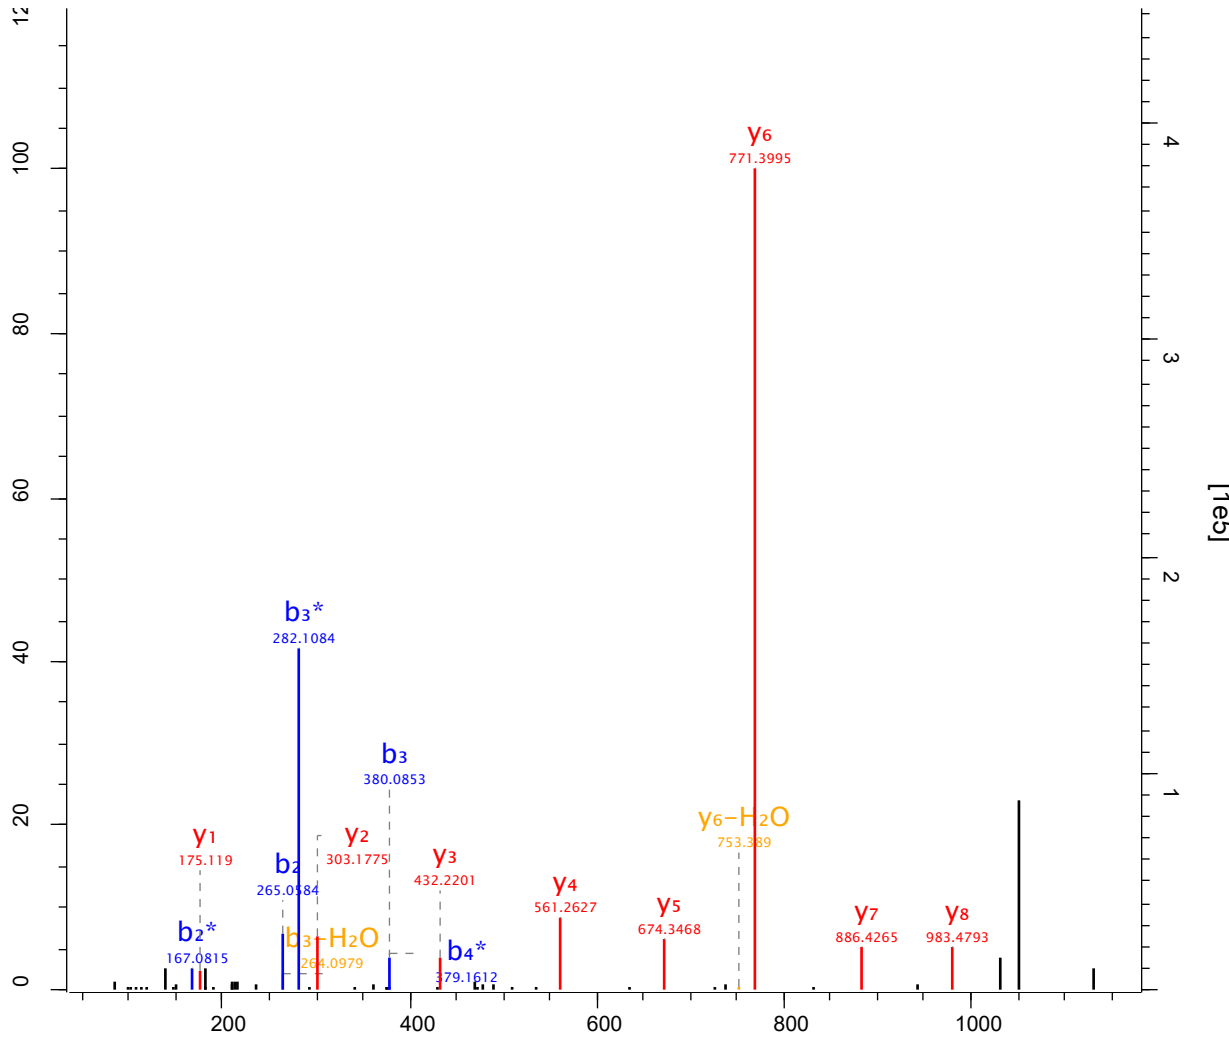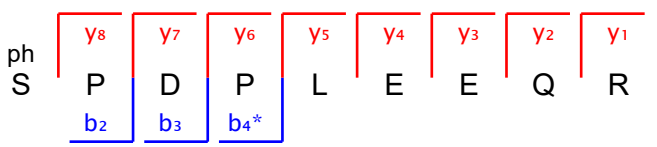

Raw file Scan Method Score m/z  
 sys\_15\_1 11322 FTMS; HCD 76.36 627.78

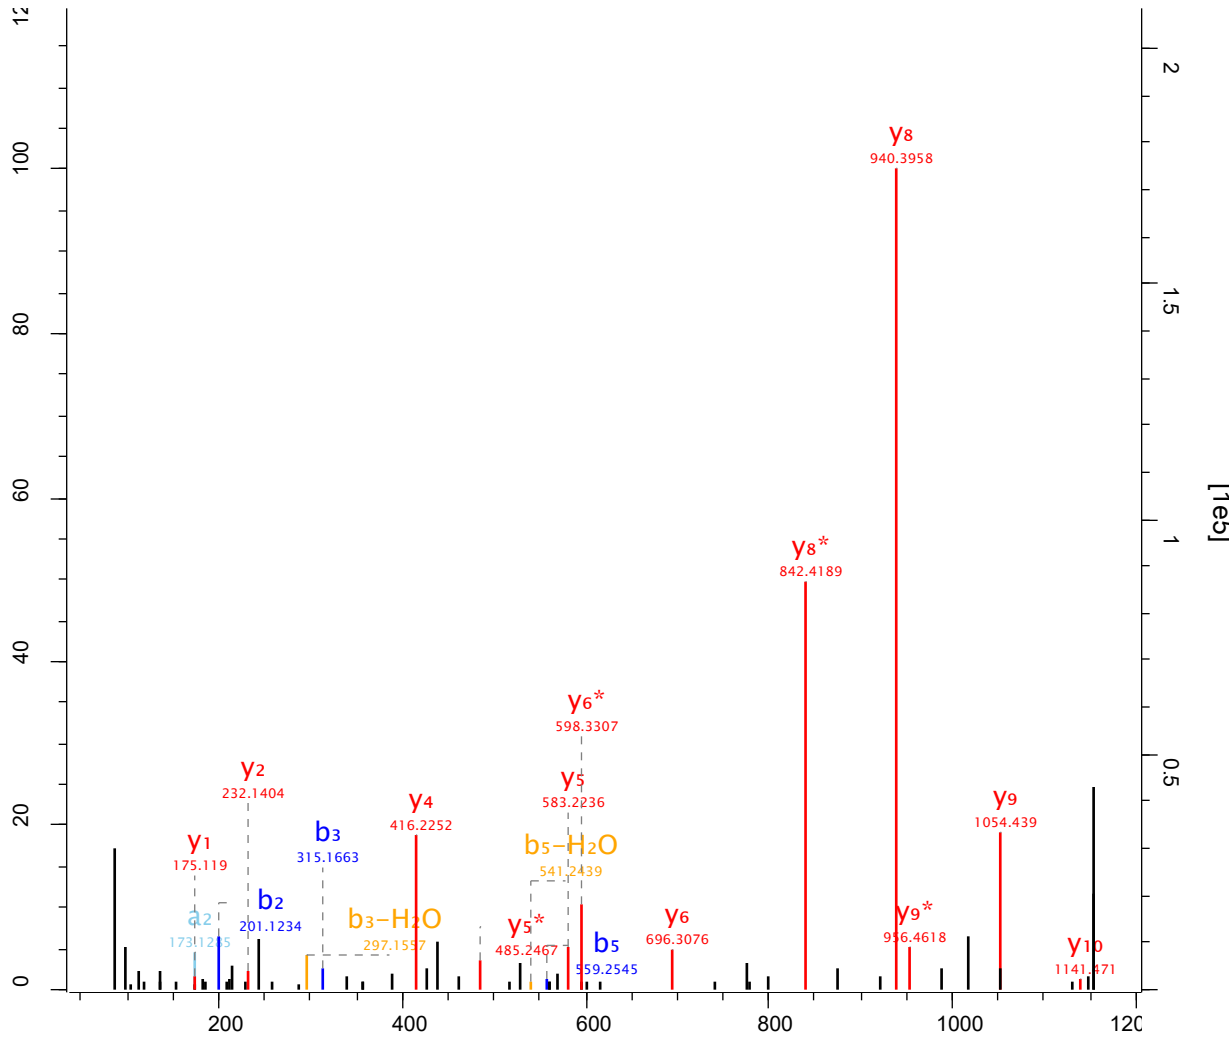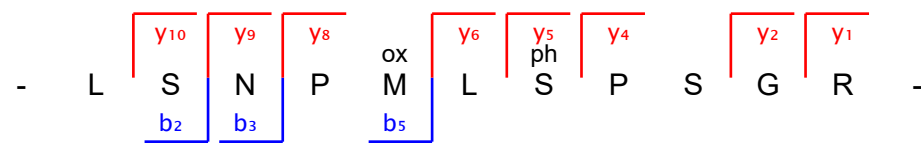

Raw file Scan Method Score m/z  
 sys\_15\_1 11357 FTMS; HCD 53.45 748.33

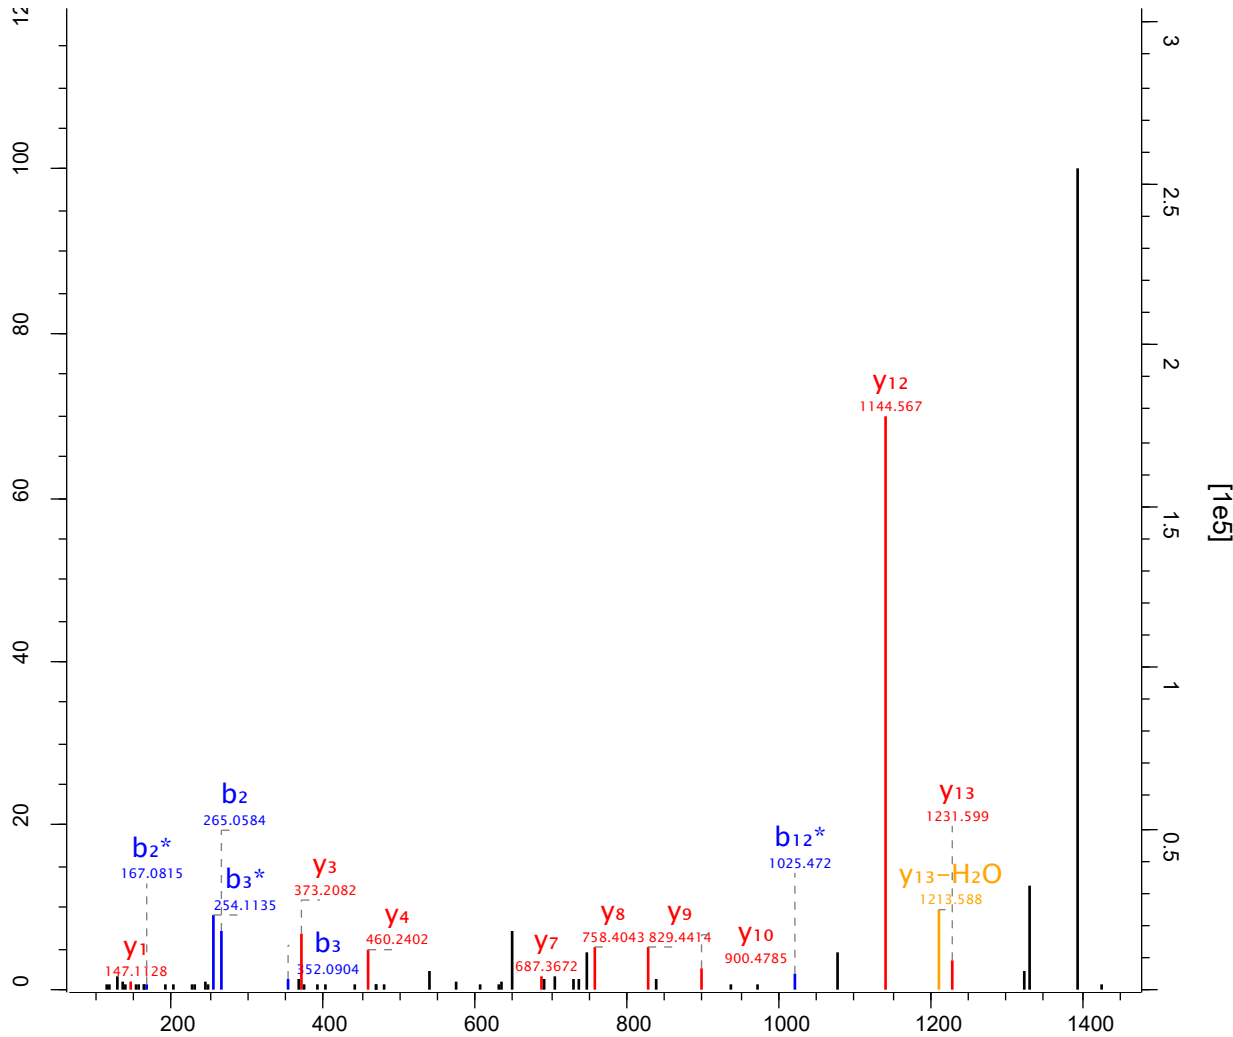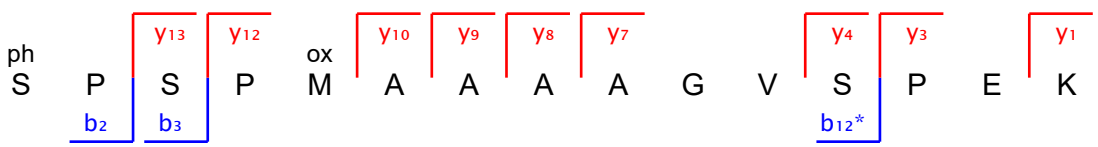



Raw file Scan Method Score m/z  
 sys\_15\_1 11360 FTMS; HCD 51.77 727.3

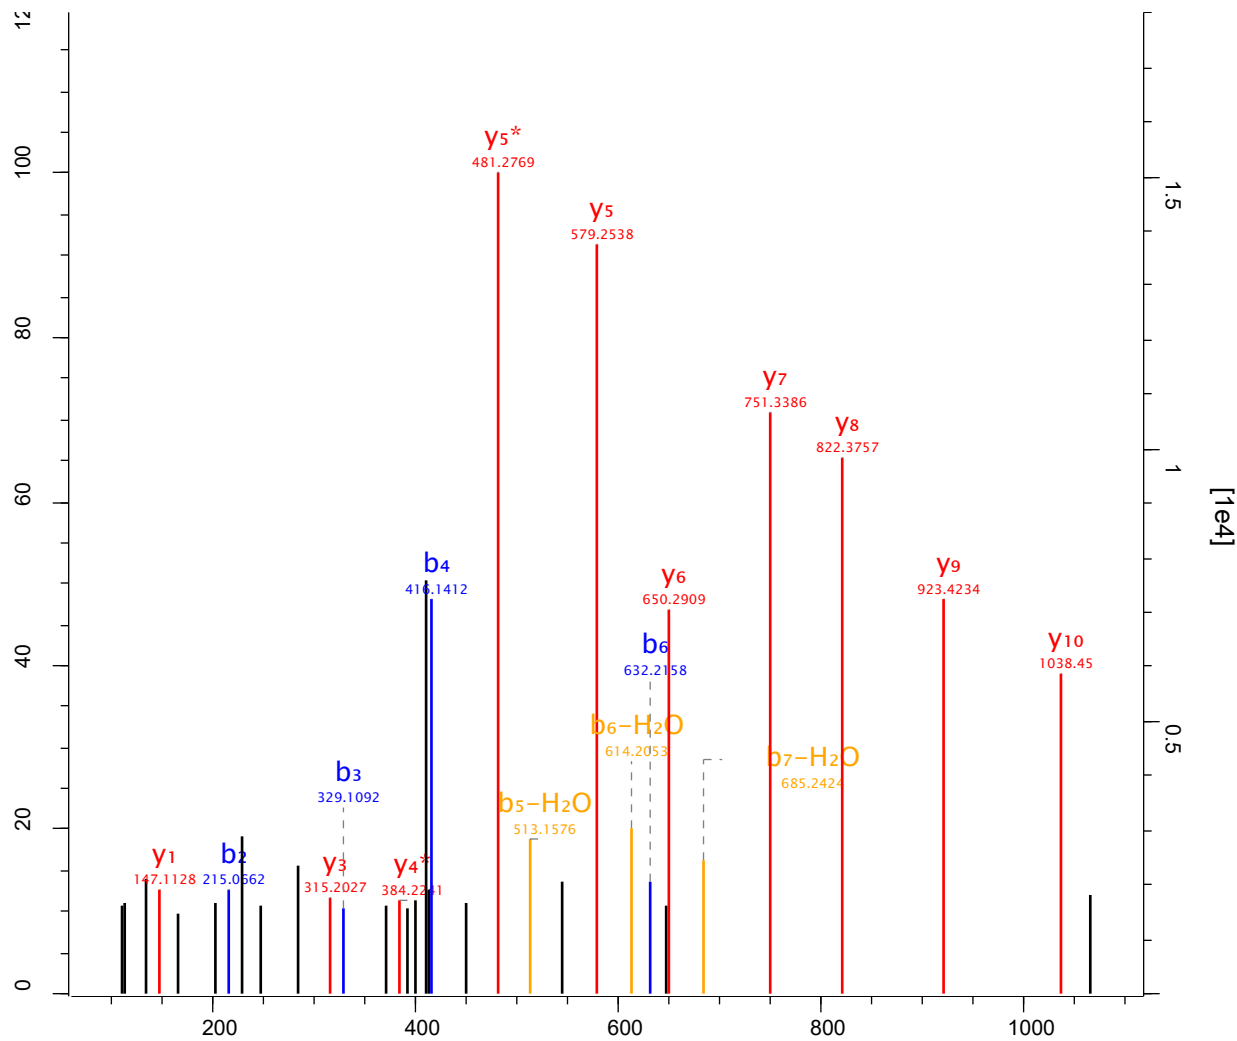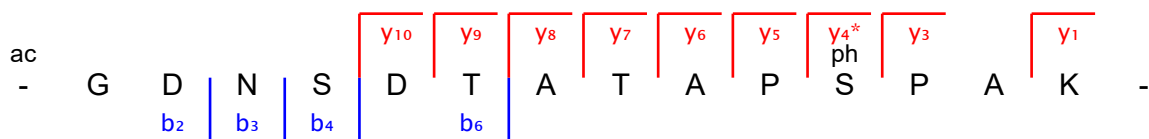

Raw file Scan Method Score m/z  
 sys\_15\_1 11429 FTMS; HCD 198.77 788.85

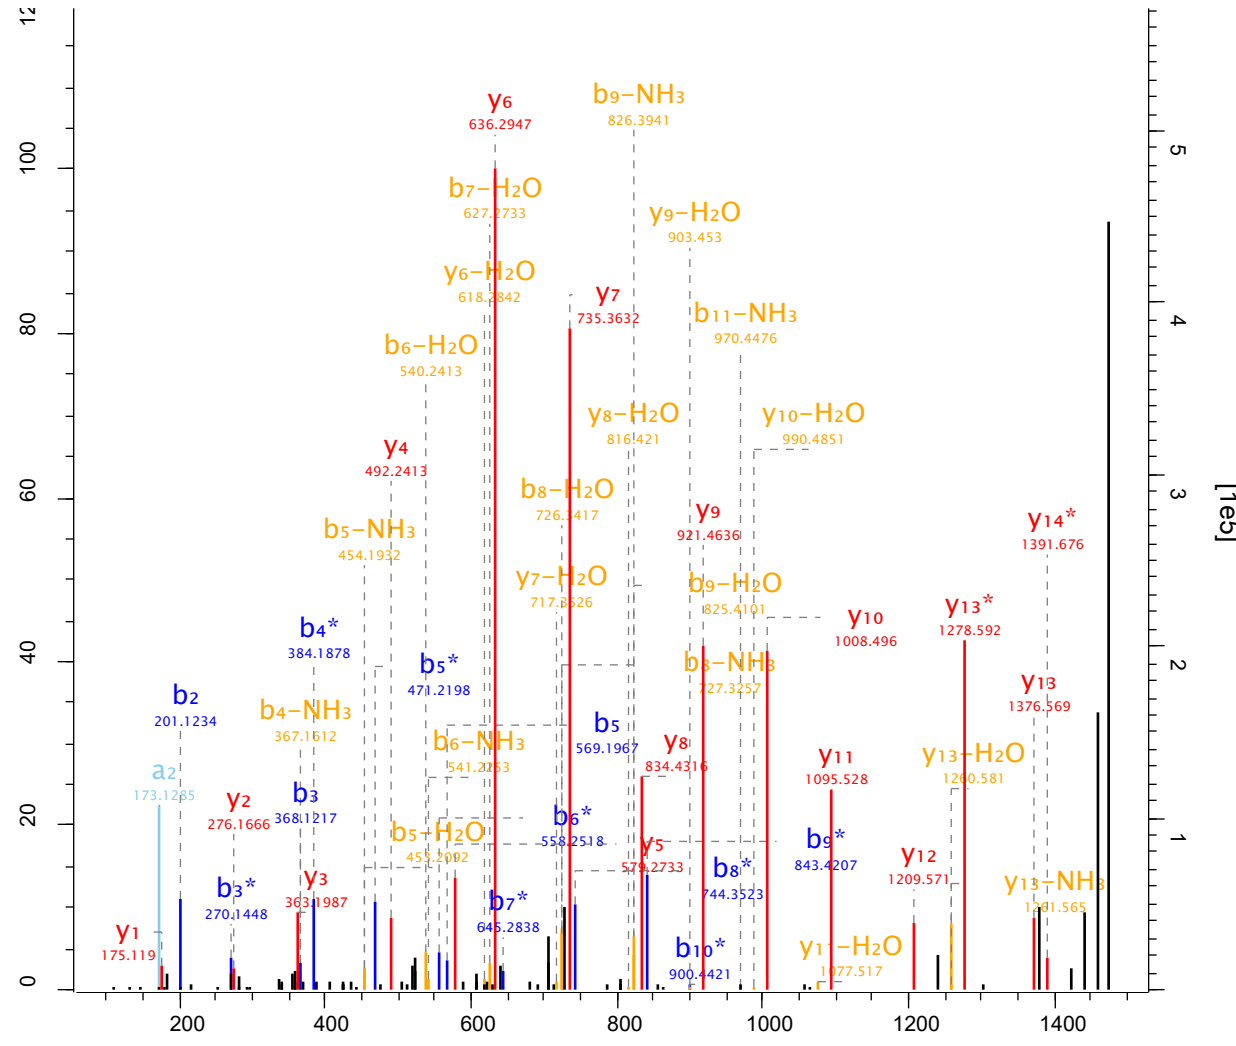

S I S N S S S V V G S E S T R

y14\*
y13
y12
y11
y10
y9
y8
y7
y6
y5
y4
y3
y2
y1

b2
b3
b4\*
b5
b6\*
b7\*
b8\*
b9\*
b10\*

Raw file Scan Method Score m/z  
 sys\_15\_1 11688 FTMS; HCD 126.26 898.33

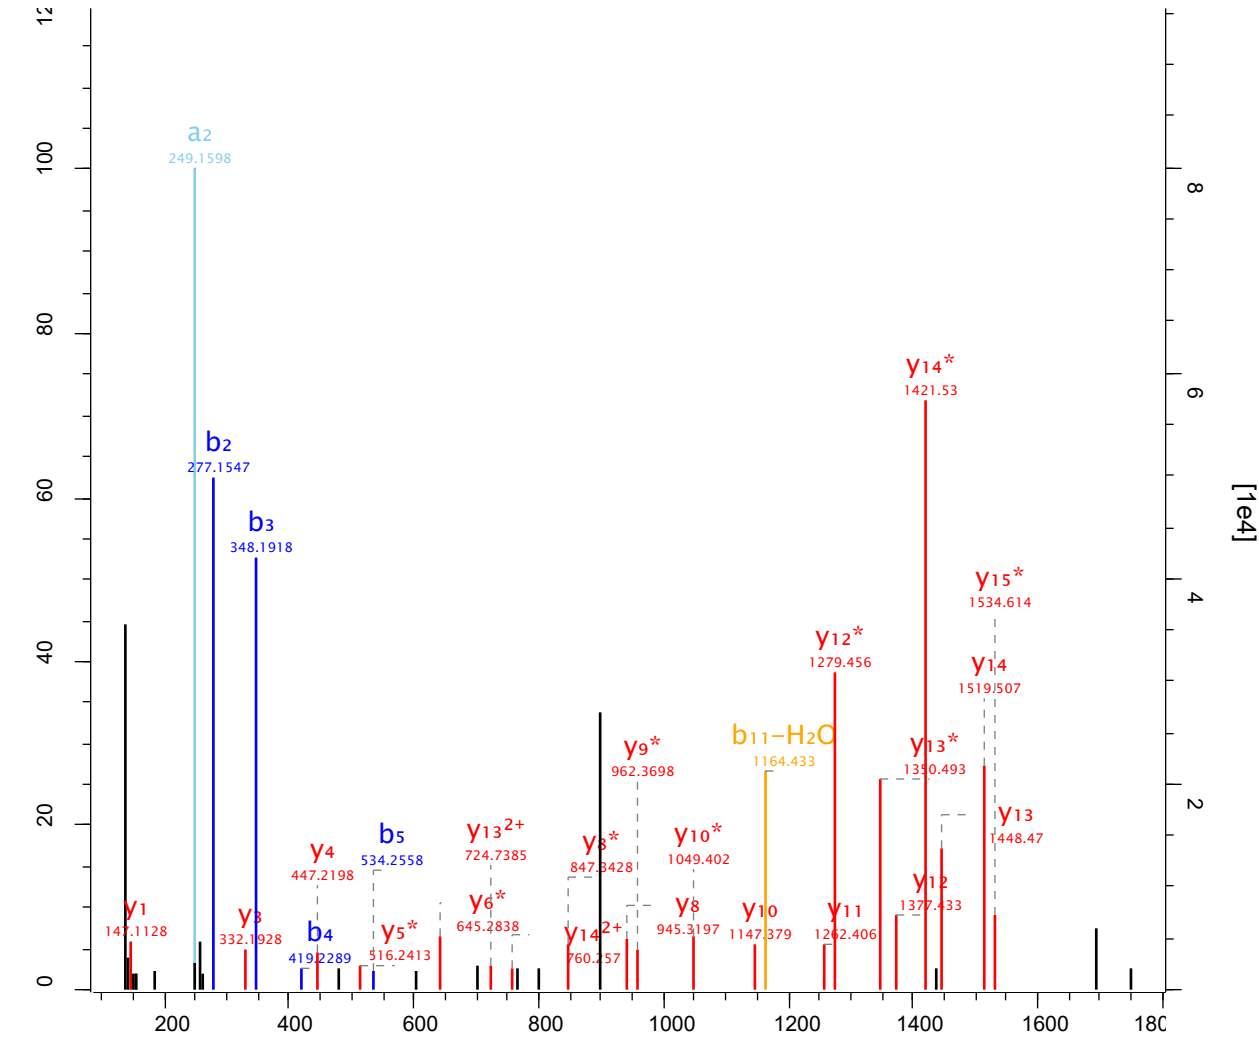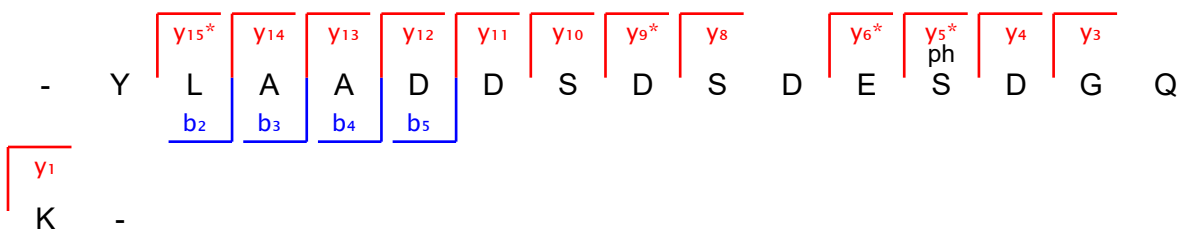

Raw file Scan Method Score m/z  
 sys\_15\_1 11860 FTMS; HCD 107.09 617.77

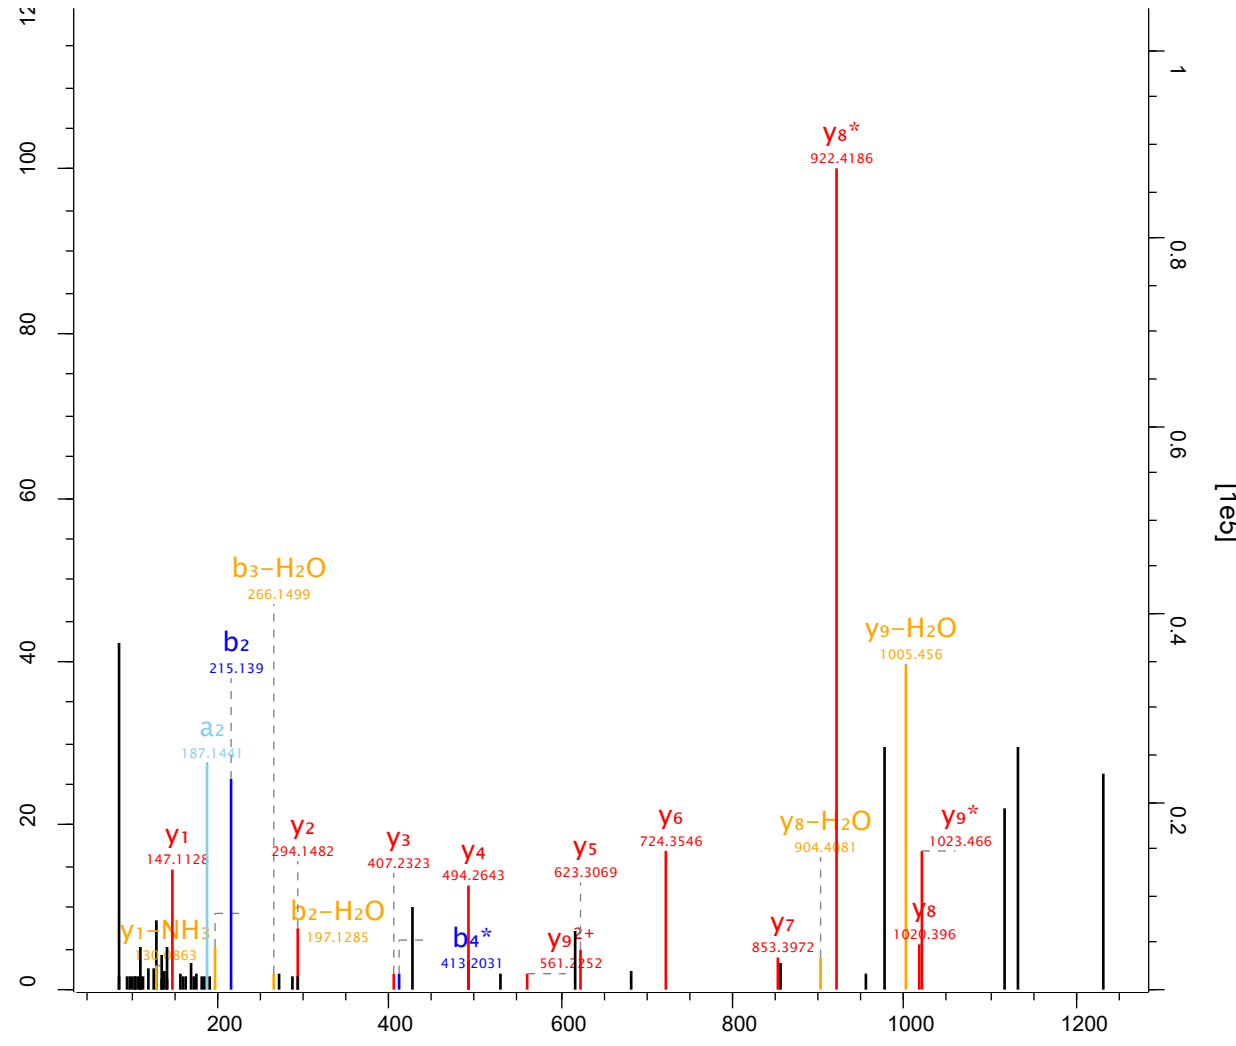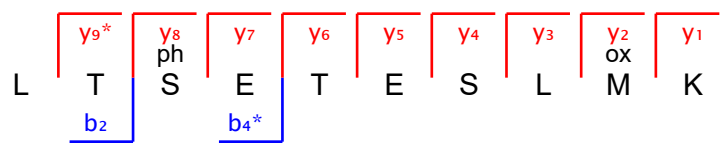

Raw file Scan Method Score m/z  
 sys\_15\_1 11872 FTMS; HCD 269.61 790.84

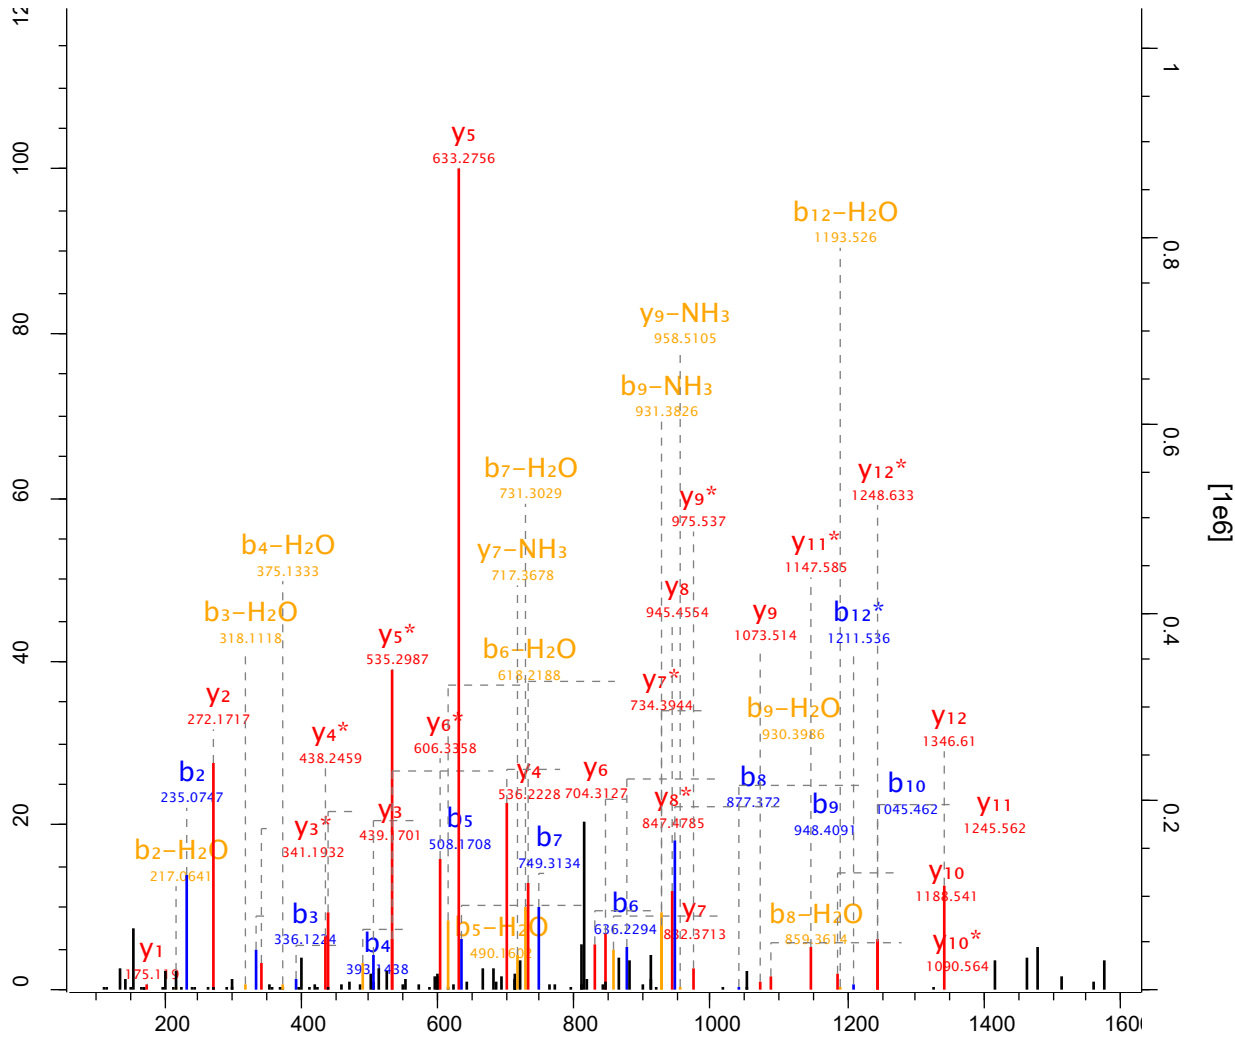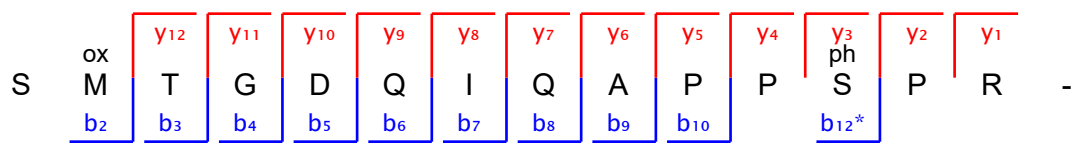

Raw file Scan Method Score m/z  
 sys\_15\_1 11873 FTMS; HCD 112.44 595.75

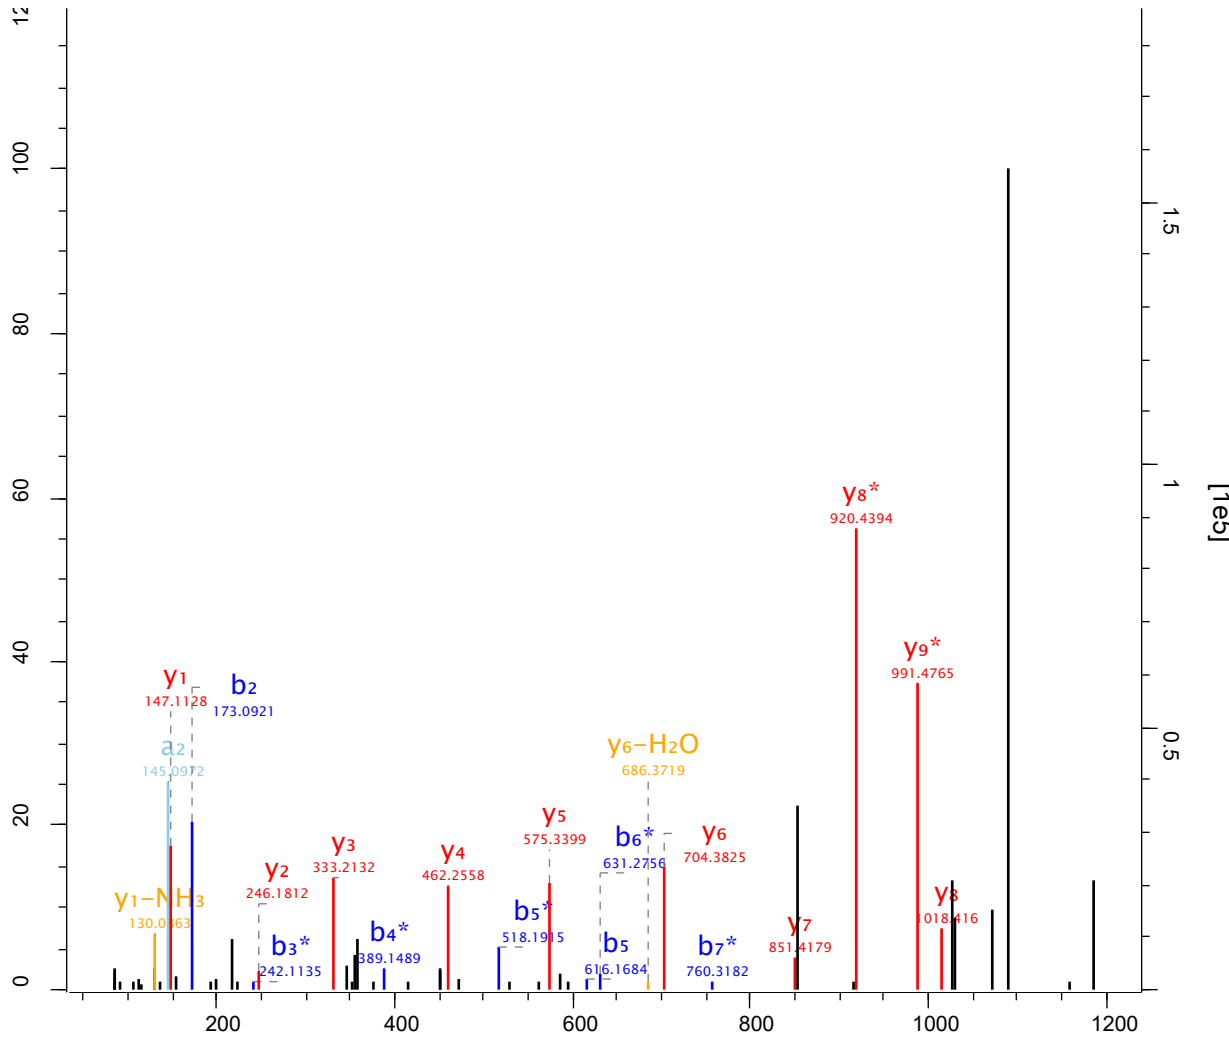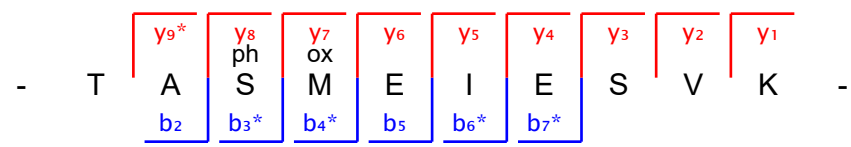

Raw file Scan Method Score m/z  
 sys\_15\_1 11896 FTMS; HCD 251 829.35

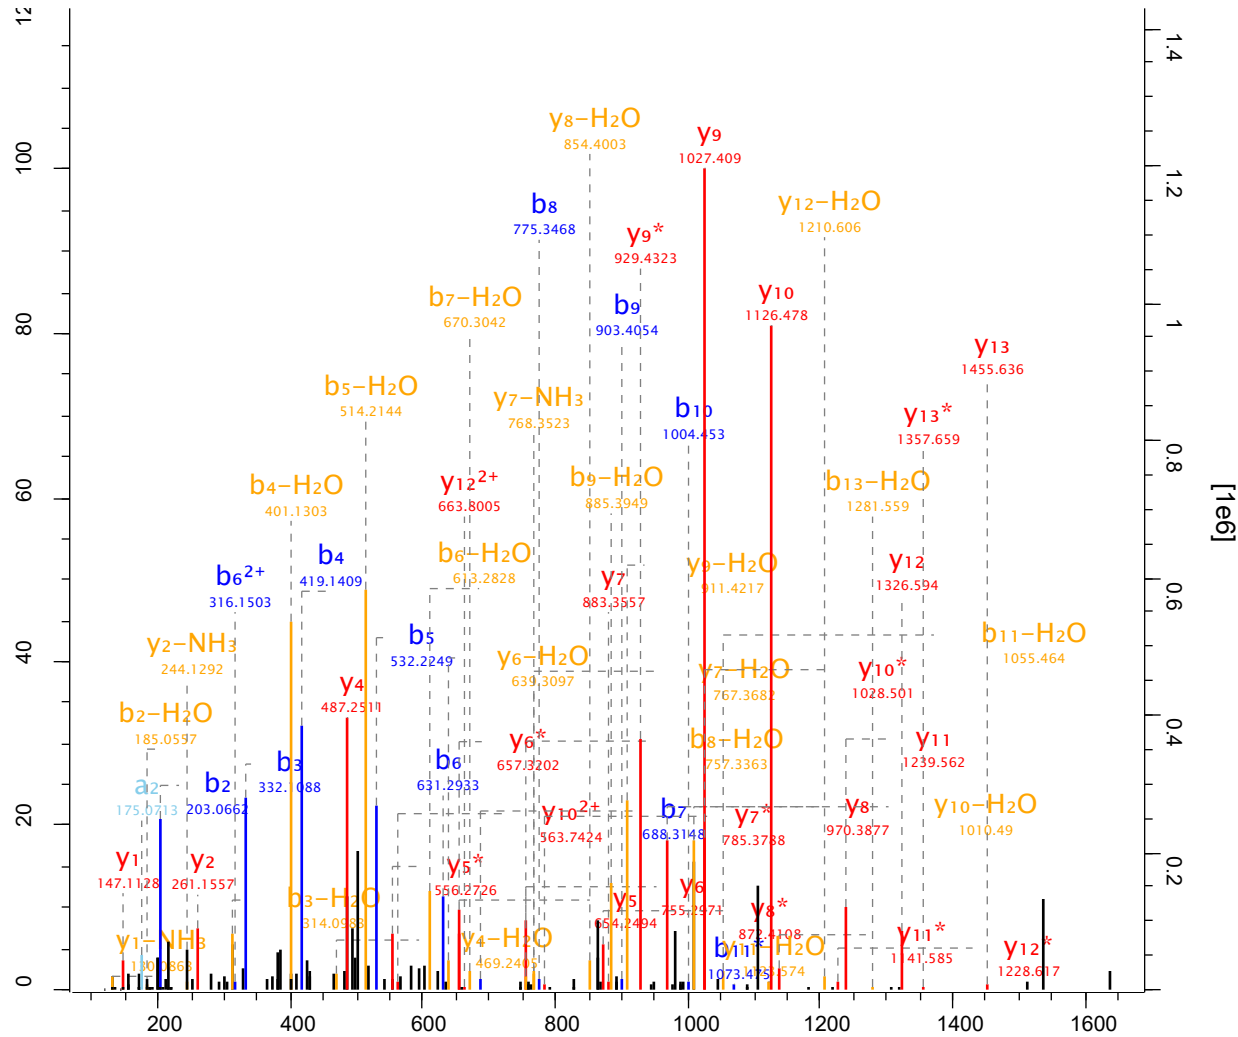

- S D E S I V G S Q T S P E N K

b<sub>2</sub>
b<sub>3</sub>
b<sub>4</sub>
b<sub>5</sub>
b<sub>6</sub>
b<sub>7</sub>
b<sub>8</sub>
b<sub>9</sub>
b<sub>10</sub>
b<sub>11</sub><sup>\*</sup>
y<sub>13</sub>
y<sub>12</sub>
y<sub>11</sub>
y<sub>10</sub>
y<sub>9</sub>
y<sub>8</sub>
y<sub>7</sub>
y<sub>6</sub>
y<sub>5</sub>
y<sub>4</sub>

Raw file Scan Method Score m/z  
 sys\_15\_1 12078 FTMS; HCD 107.65 675.81

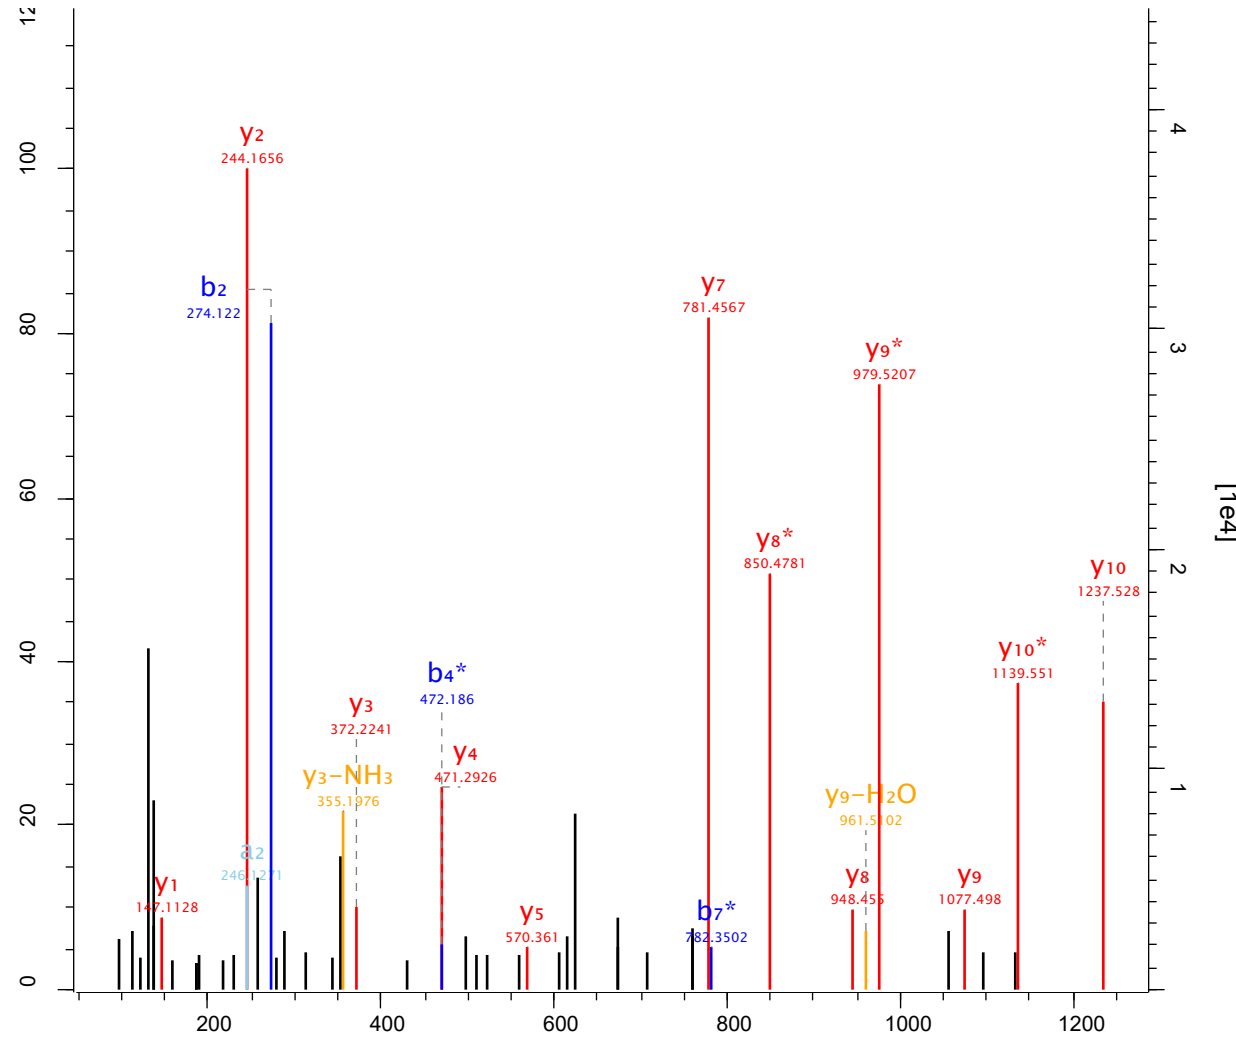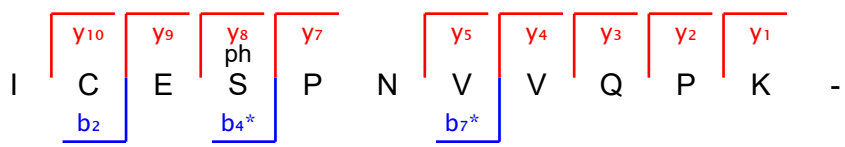



Raw file Scan Method Score m/z  
 sys\_15\_1 12117 FTMS; HCD 190.1 693.81

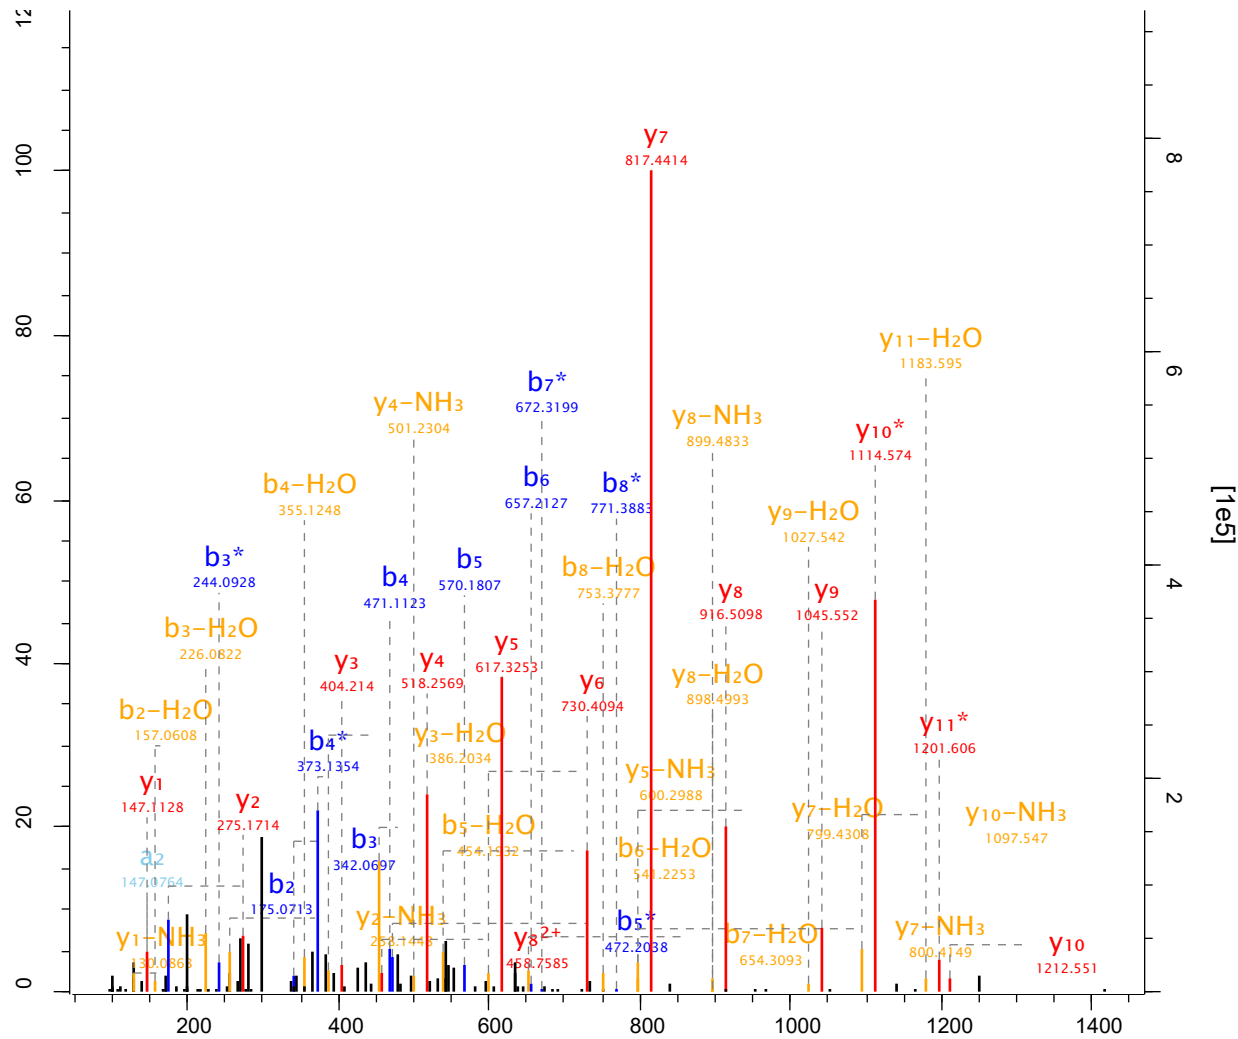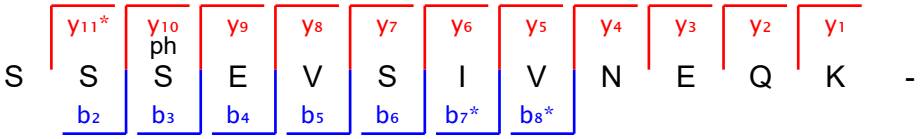

Raw file Scan Method Score m/z  
 sys\_15\_1 12148 FTMS; HCD 116.19 556.26

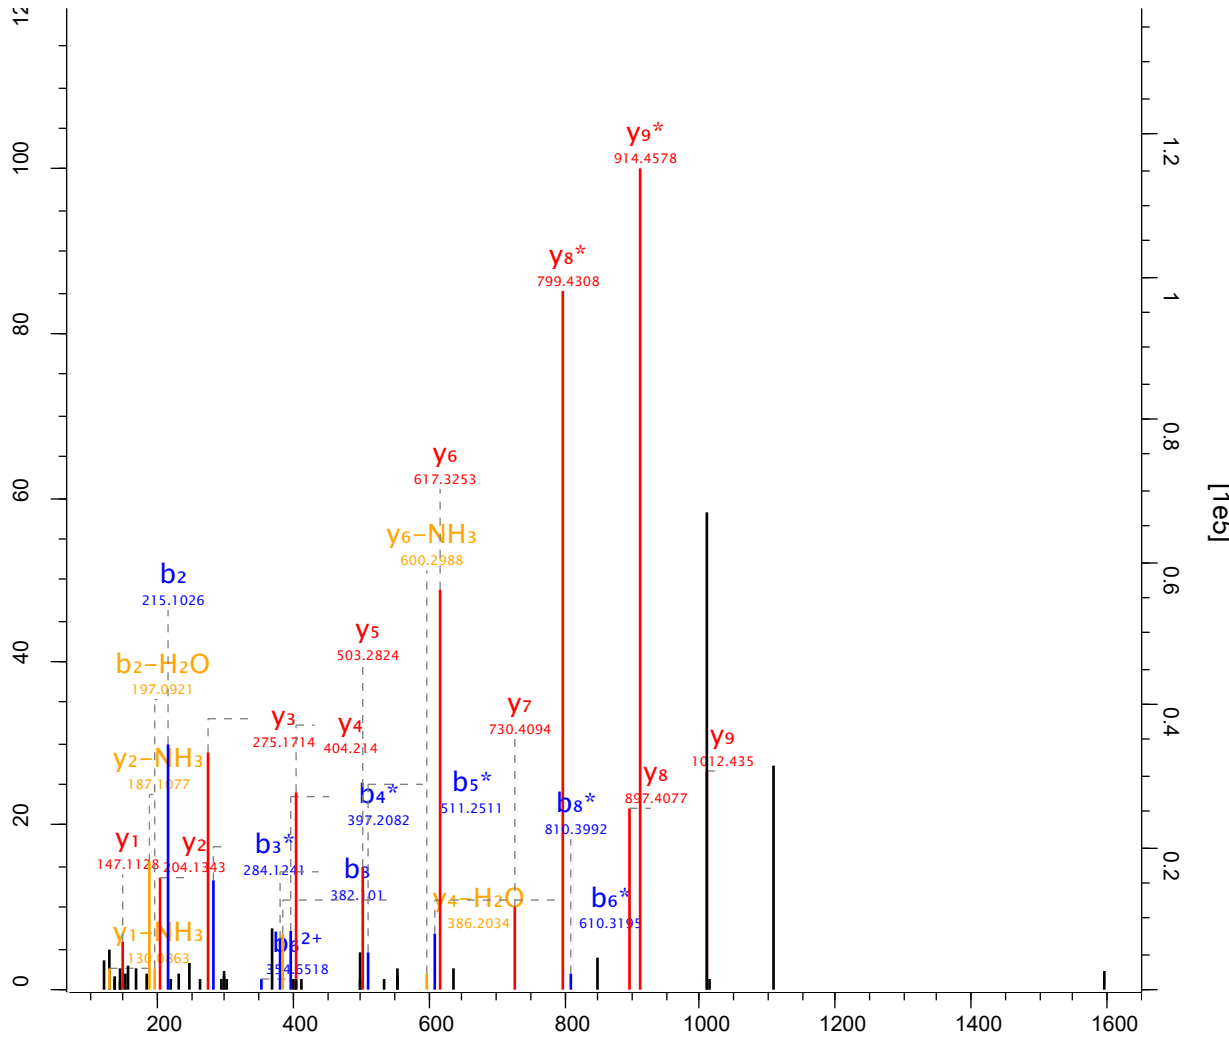

V D S L N V E A G K

b<sub>2</sub>
b<sub>3</sub>
b<sub>4</sub>\*
b<sub>5</sub>\*
b<sub>6</sub>\*
b<sub>8</sub>\*

y<sub>1</sub>
y<sub>2</sub>
y<sub>3</sub>
y<sub>4</sub>
y<sub>5</sub>
y<sub>6</sub>
y<sub>7</sub>
y<sub>8</sub>
y<sub>9</sub>

Raw file Scan Method Score m/z  
 sys\_15\_1 12158 FTMS; HCD 99.28 455.72

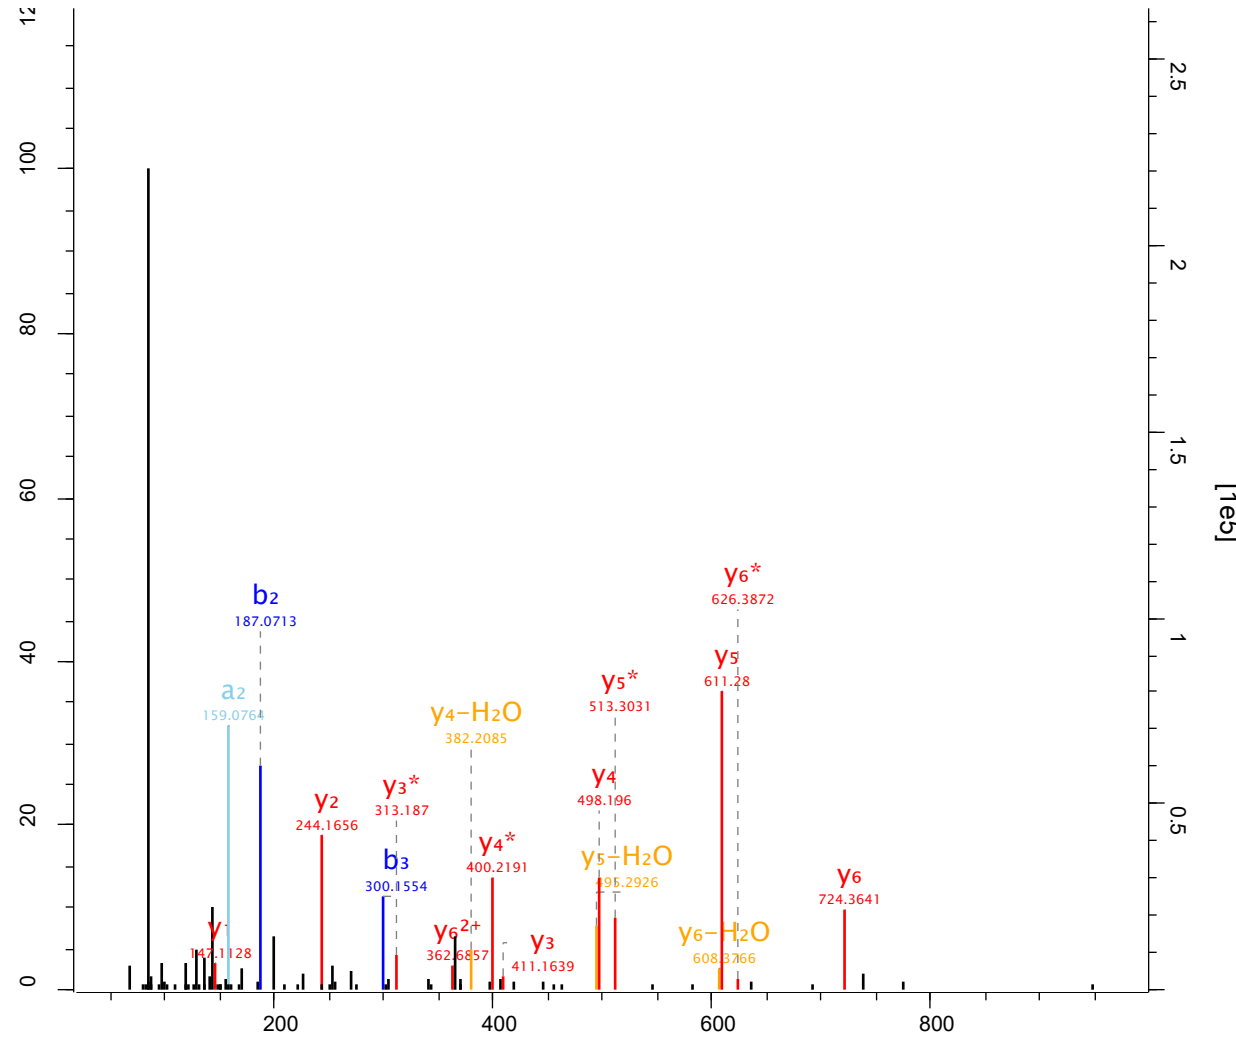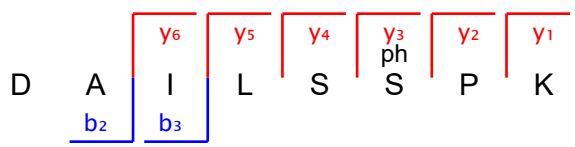

Raw file Scan Method Score m/z  
 sys\_15\_1 12159 FTMS; HCD 109.04 849.3

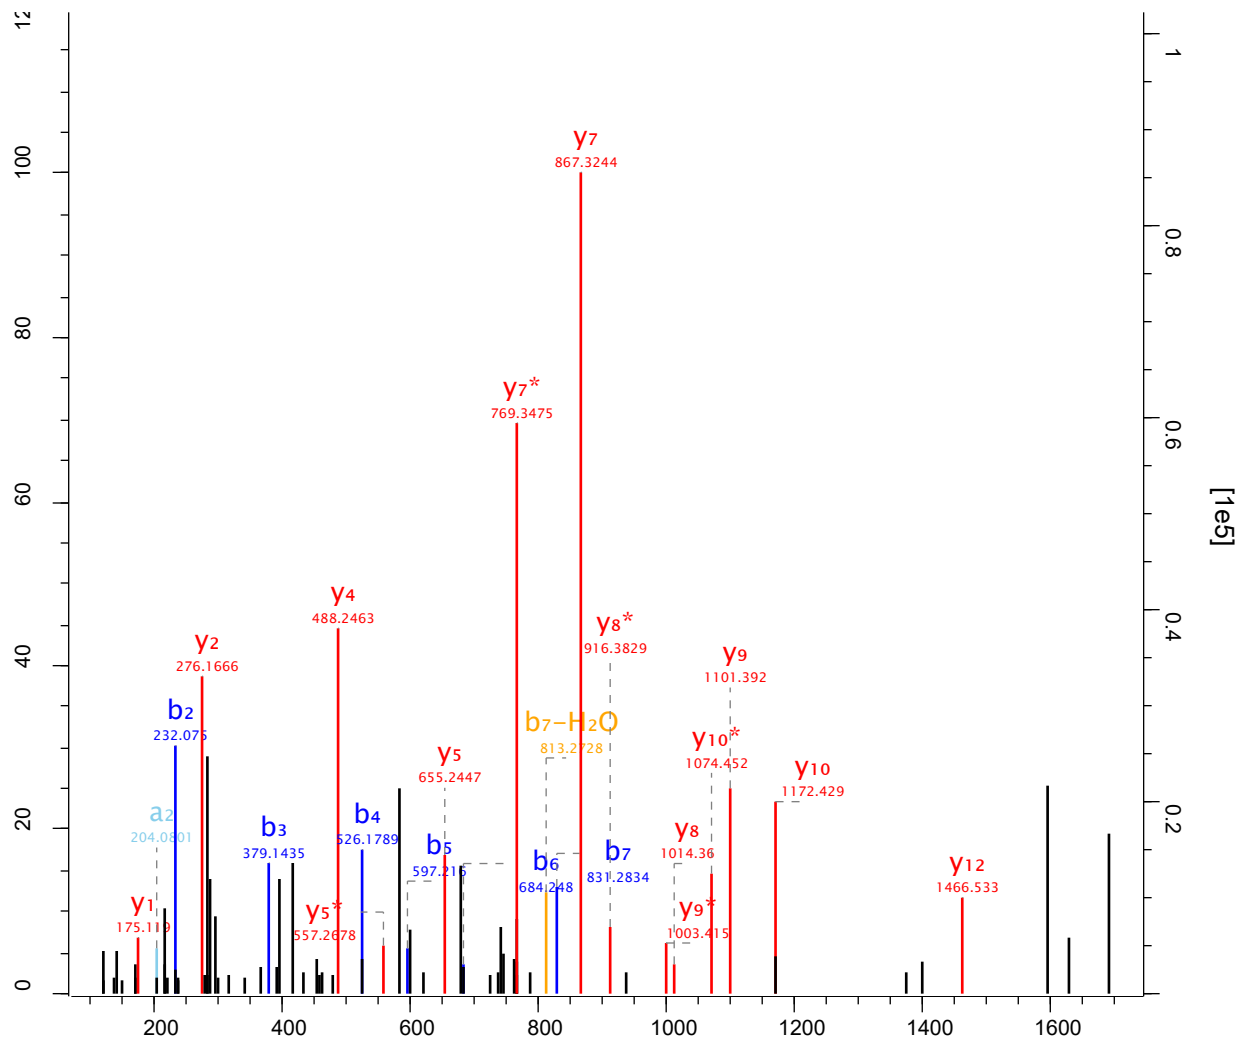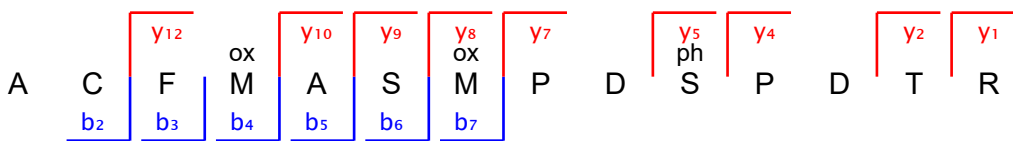

| Raw file | Scan  | Method    | Score | m/z   |
|----------|-------|-----------|-------|-------|
| sys_15_1 | 12182 | FTMS; HCD | 50.04 | 432.7 |

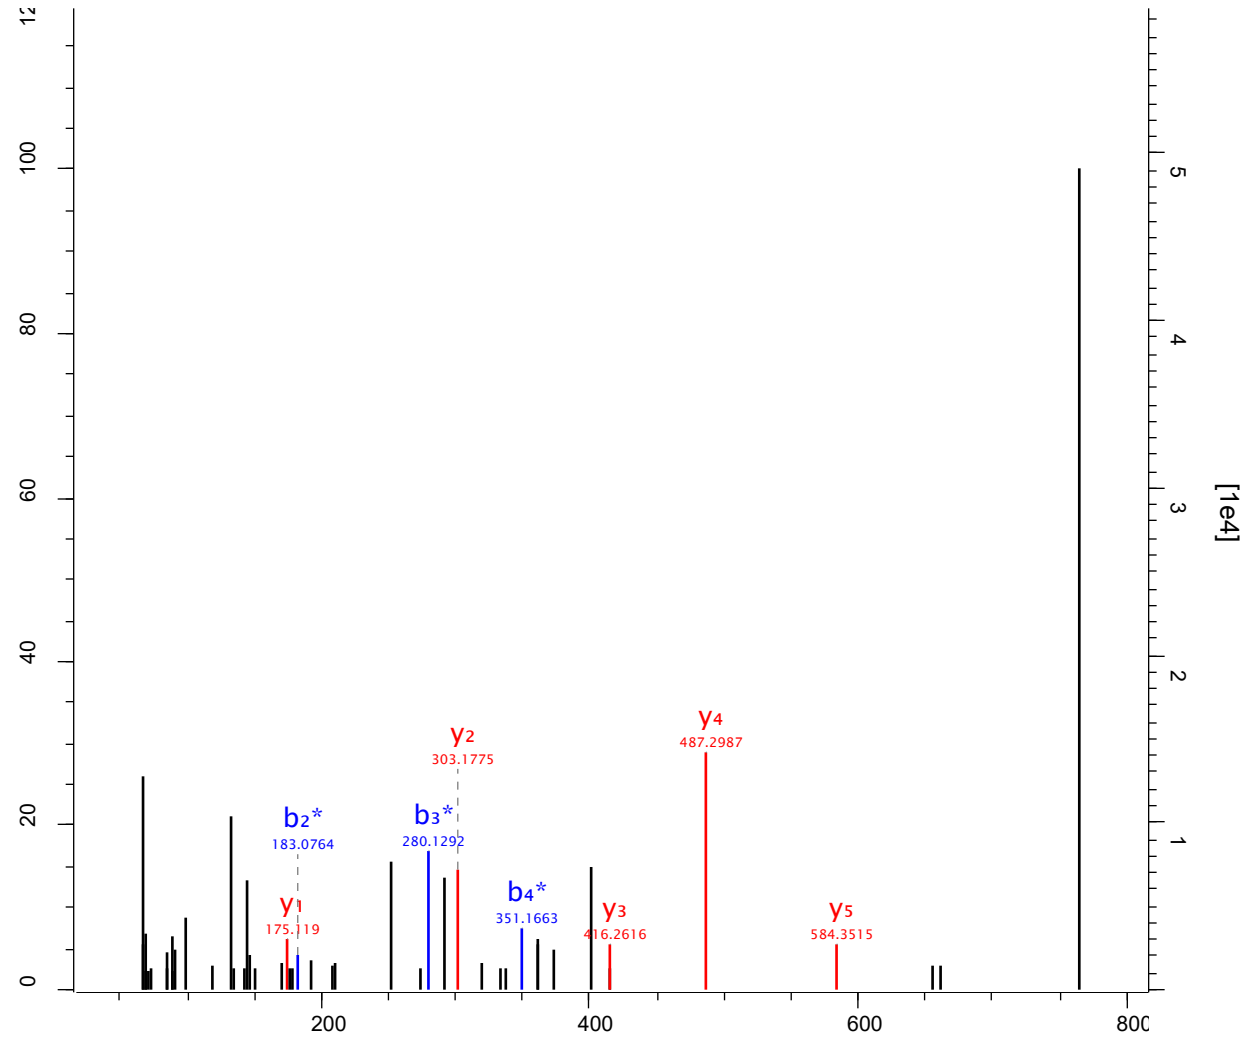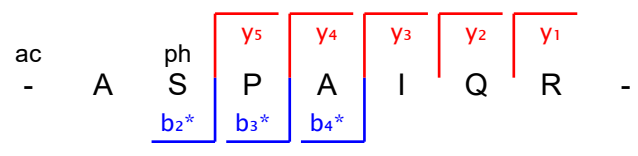

Raw file Scan Method Score m/z  
 sys\_15\_1 12236 FTMS; HCD 104.43 477.23

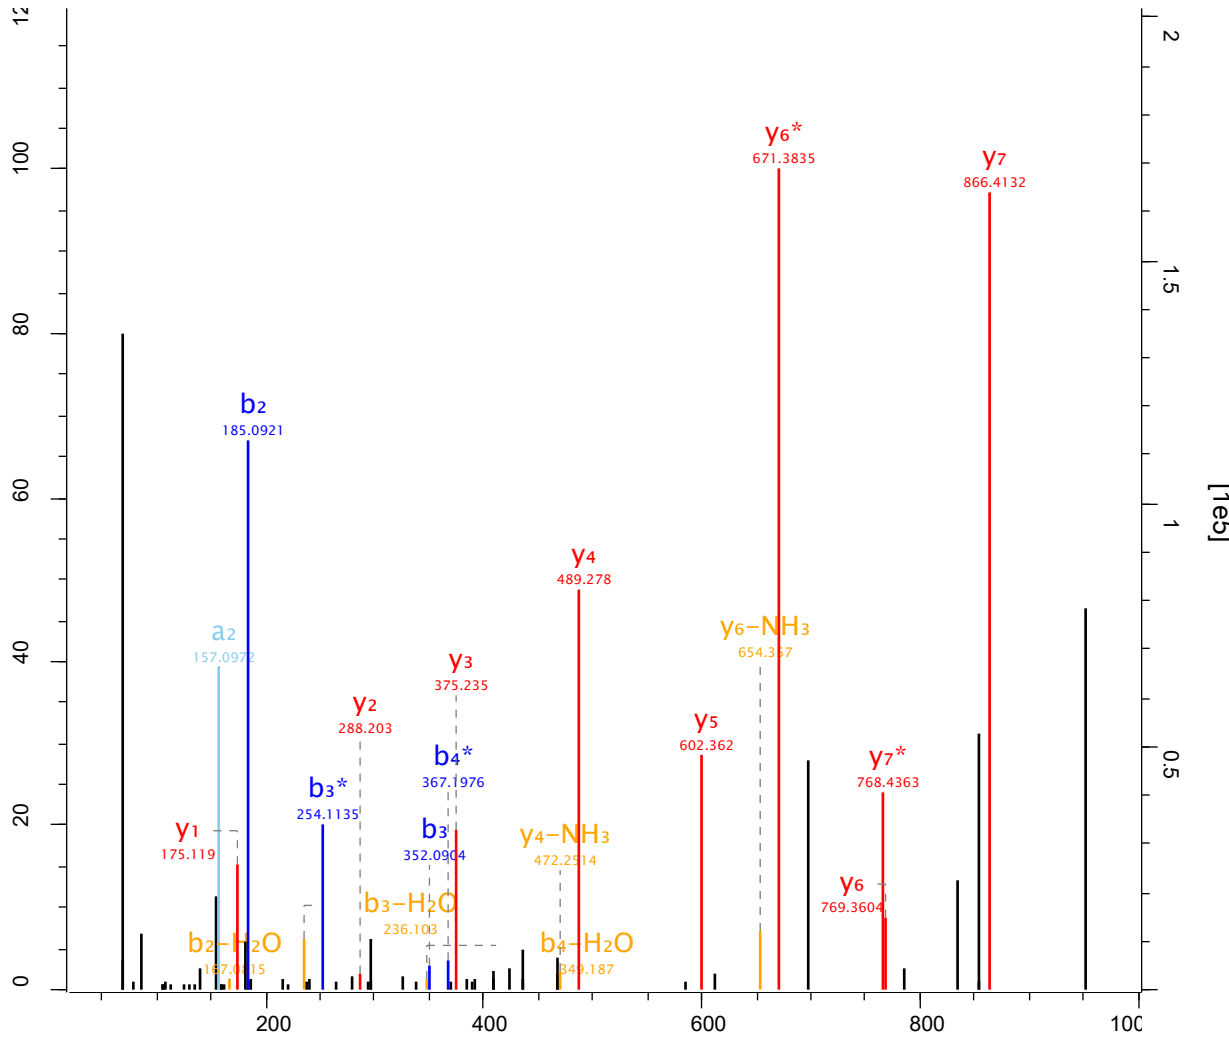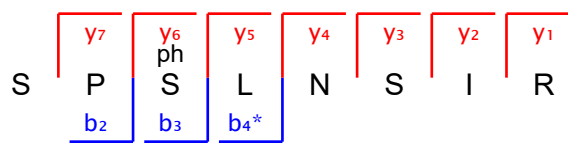

Raw file Scan Method Score m/z  
 sys\_15\_1 12327 FTMS; HCD 137.64 841.87

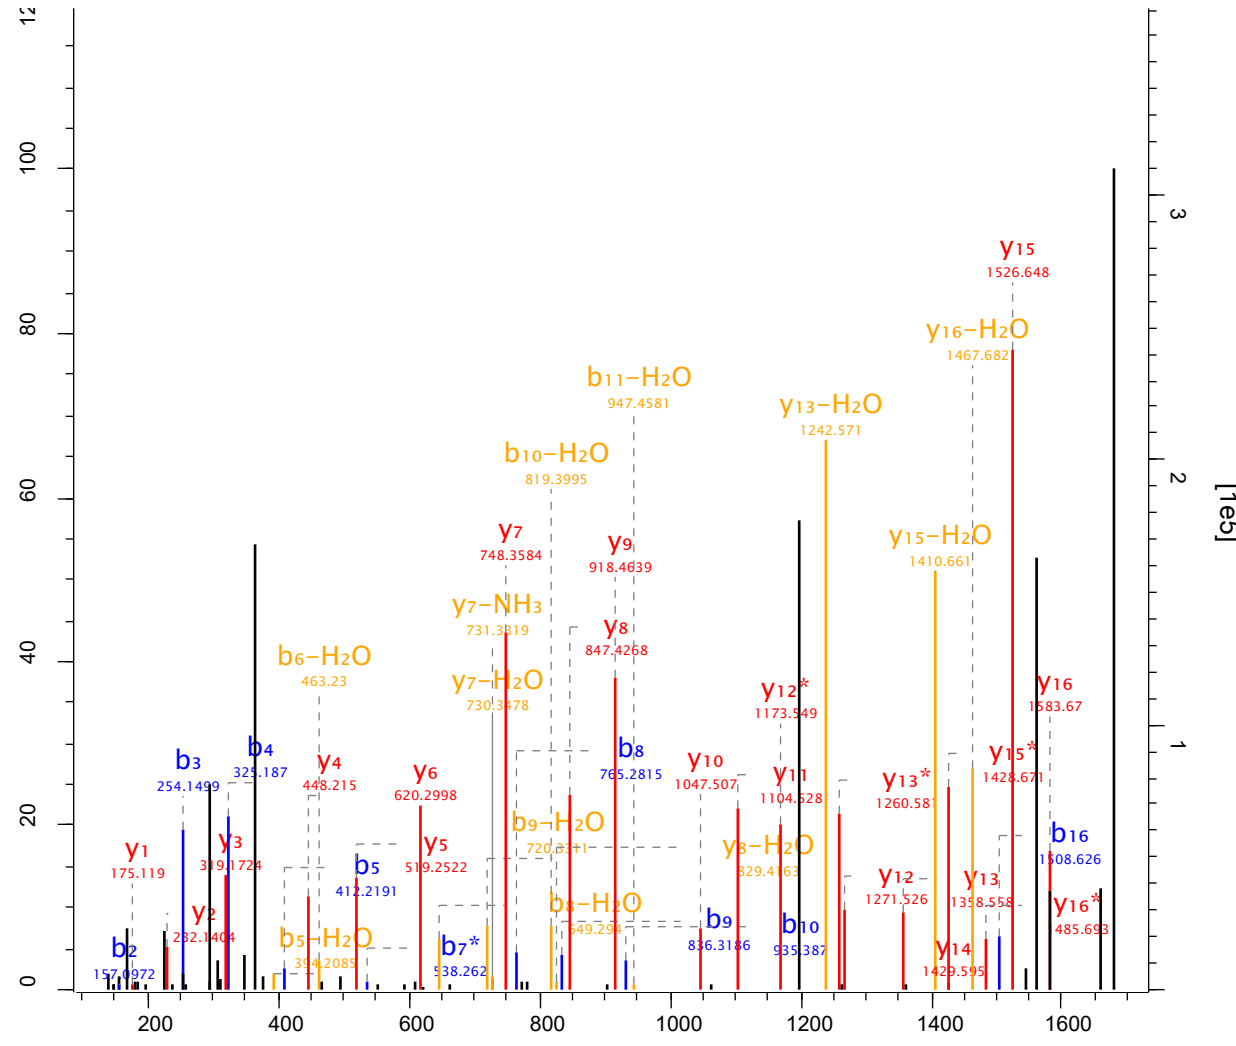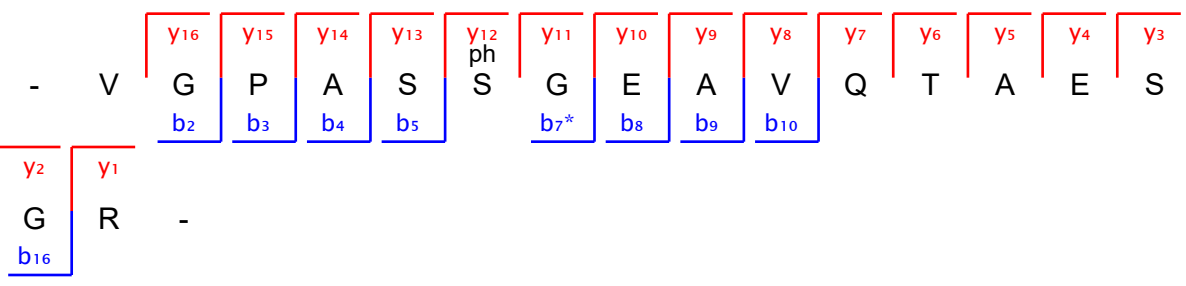

Raw file Scan Method Score m/z  
 sys\_15\_1 12357 FTMS; HCD 69.7 949.06

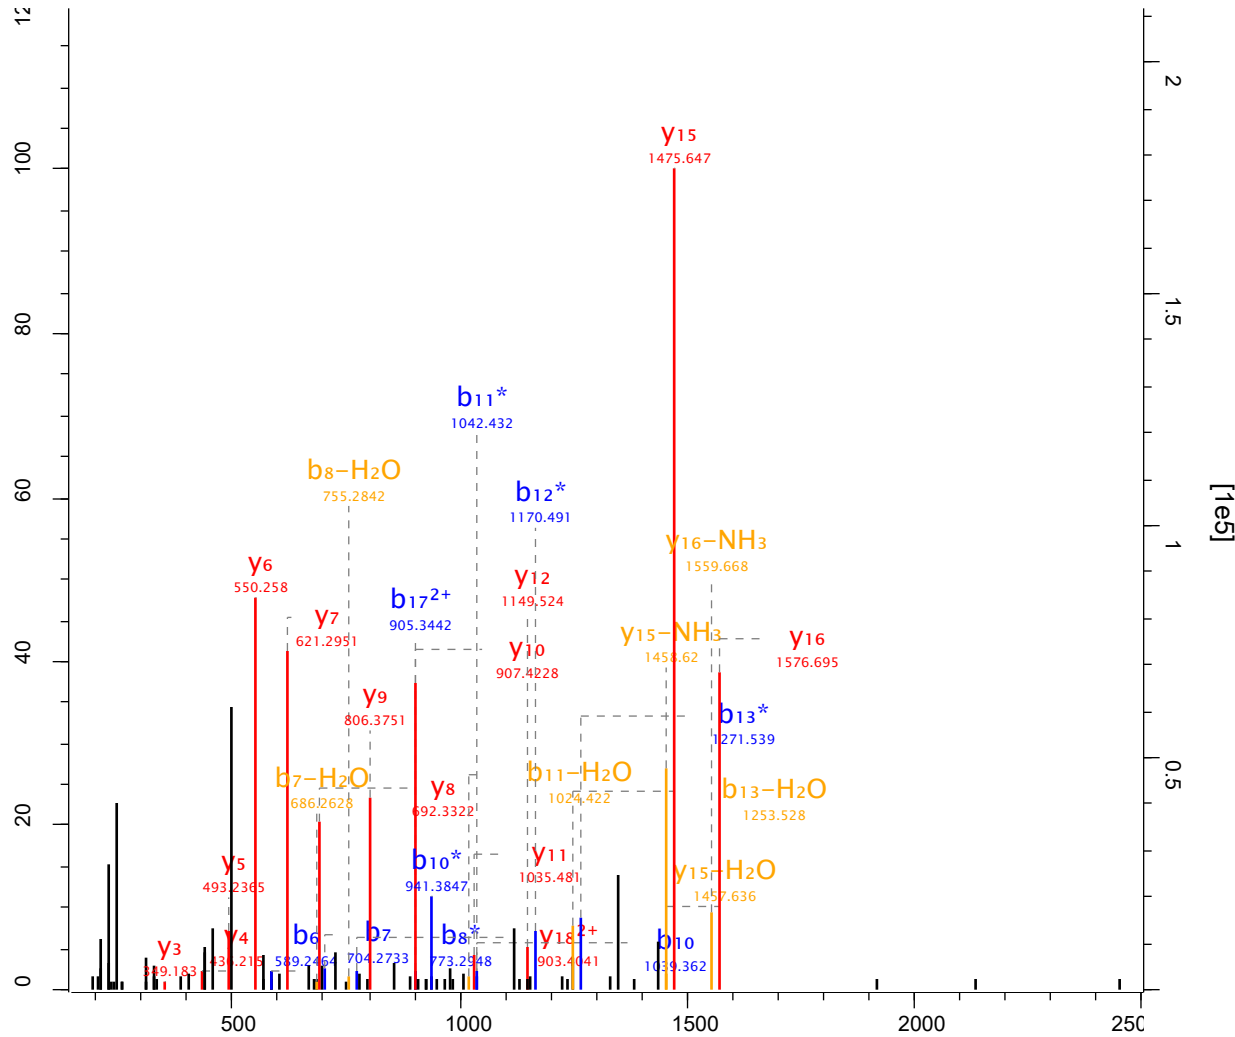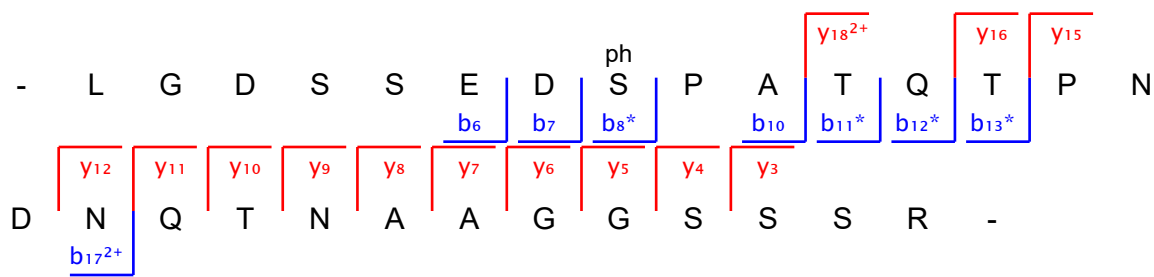



Raw file Scan Method Score m/z  
 sys\_15\_1 12376 FTMS; HCD 186.45 833.82

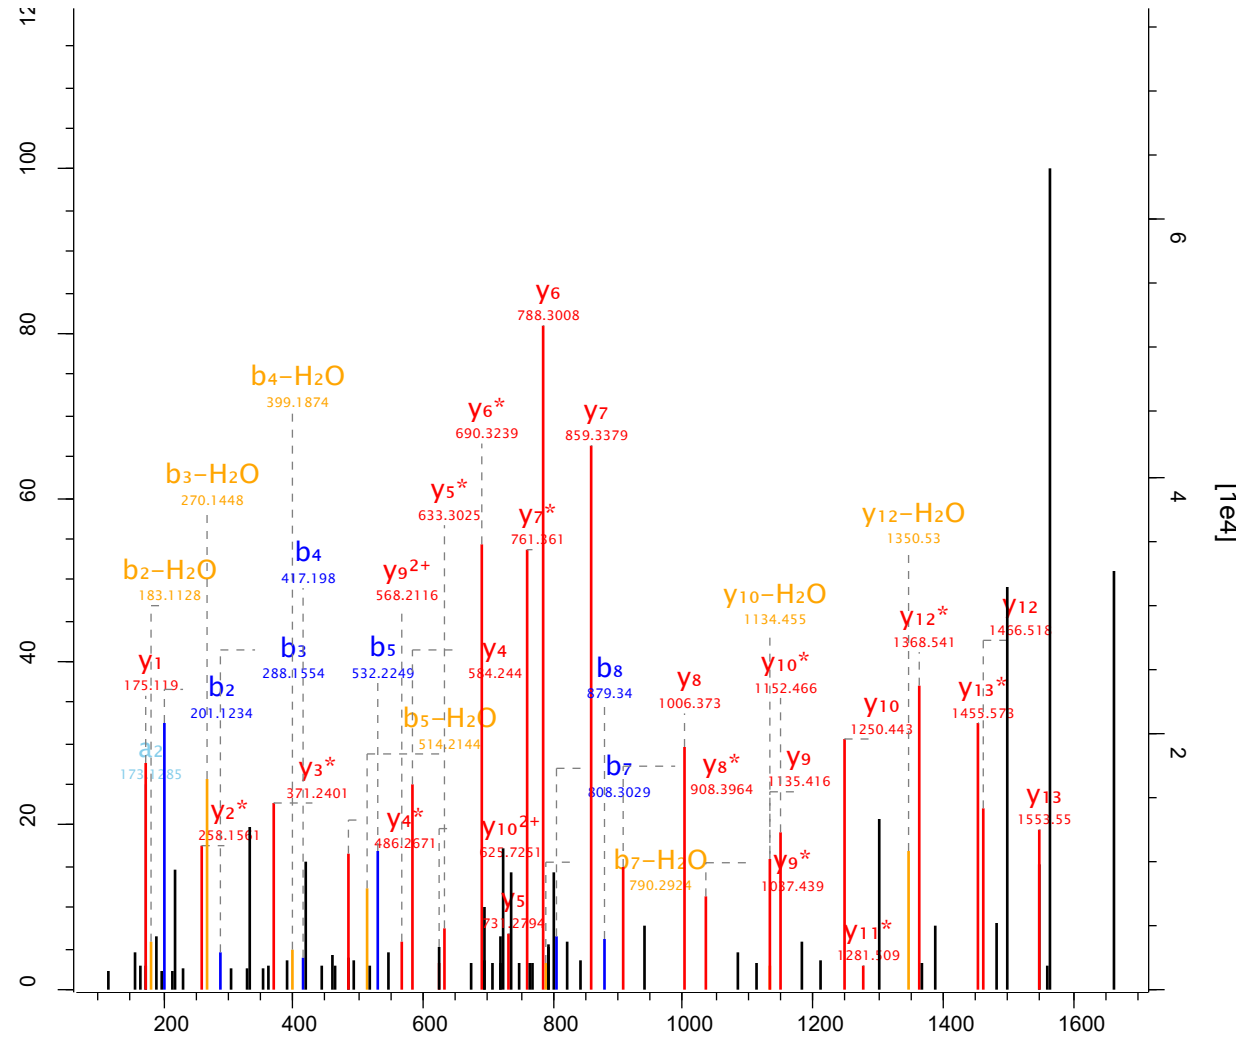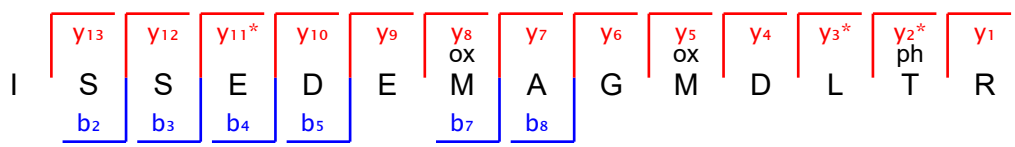

Raw file Scan Method Score m/z  
 sys\_15\_1 12564 FTMS; HCD 108.63 702.28

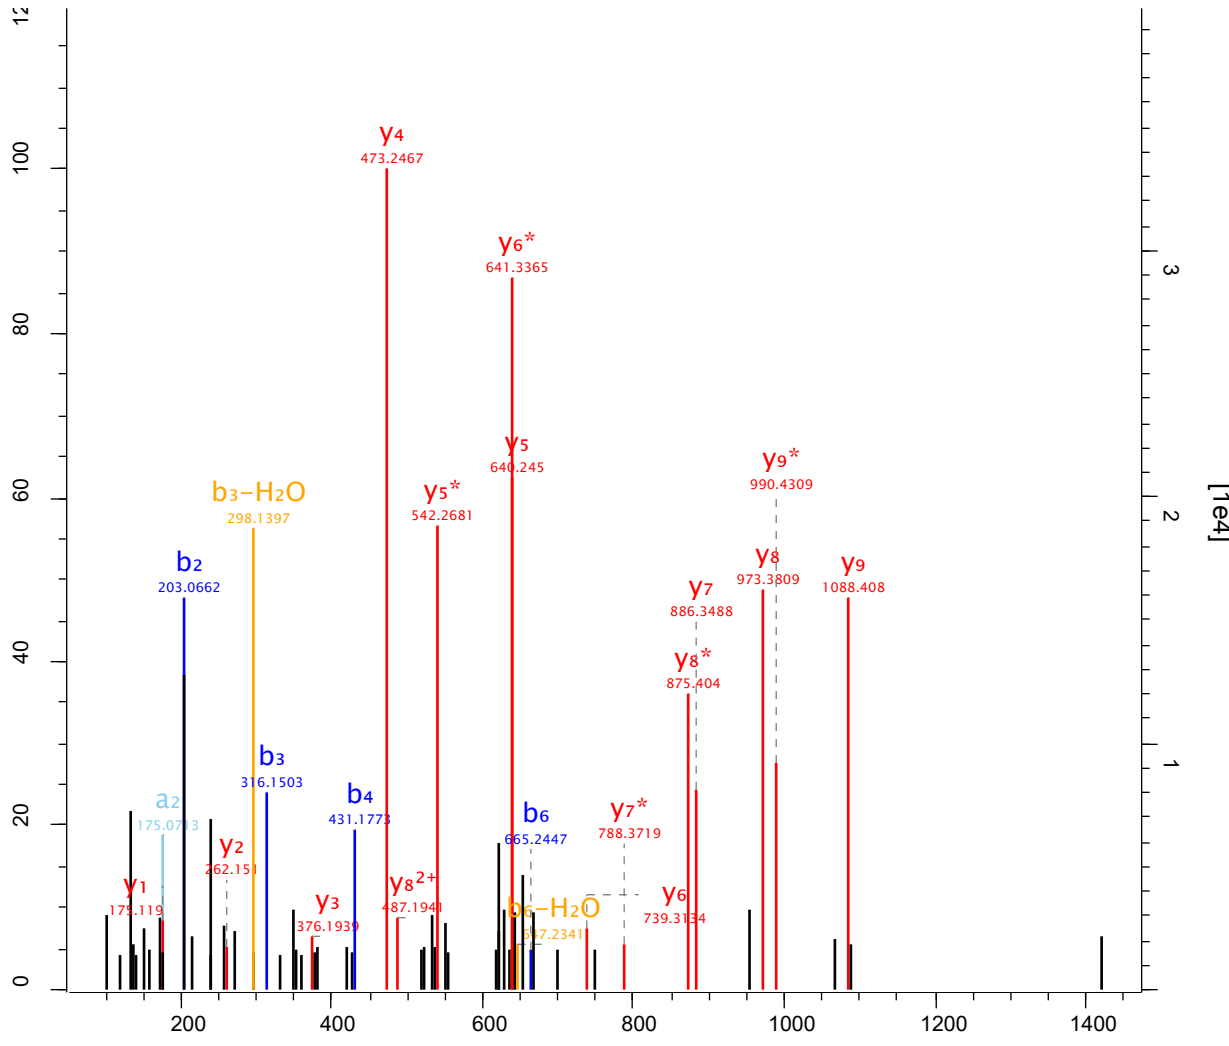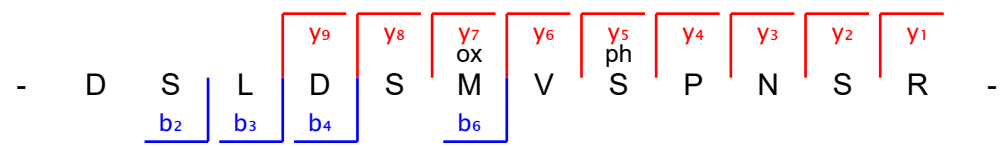

Raw file Scan Method Score m/z  
 sys\_15\_1 12592 FTMS; HCD 203.93 776.32

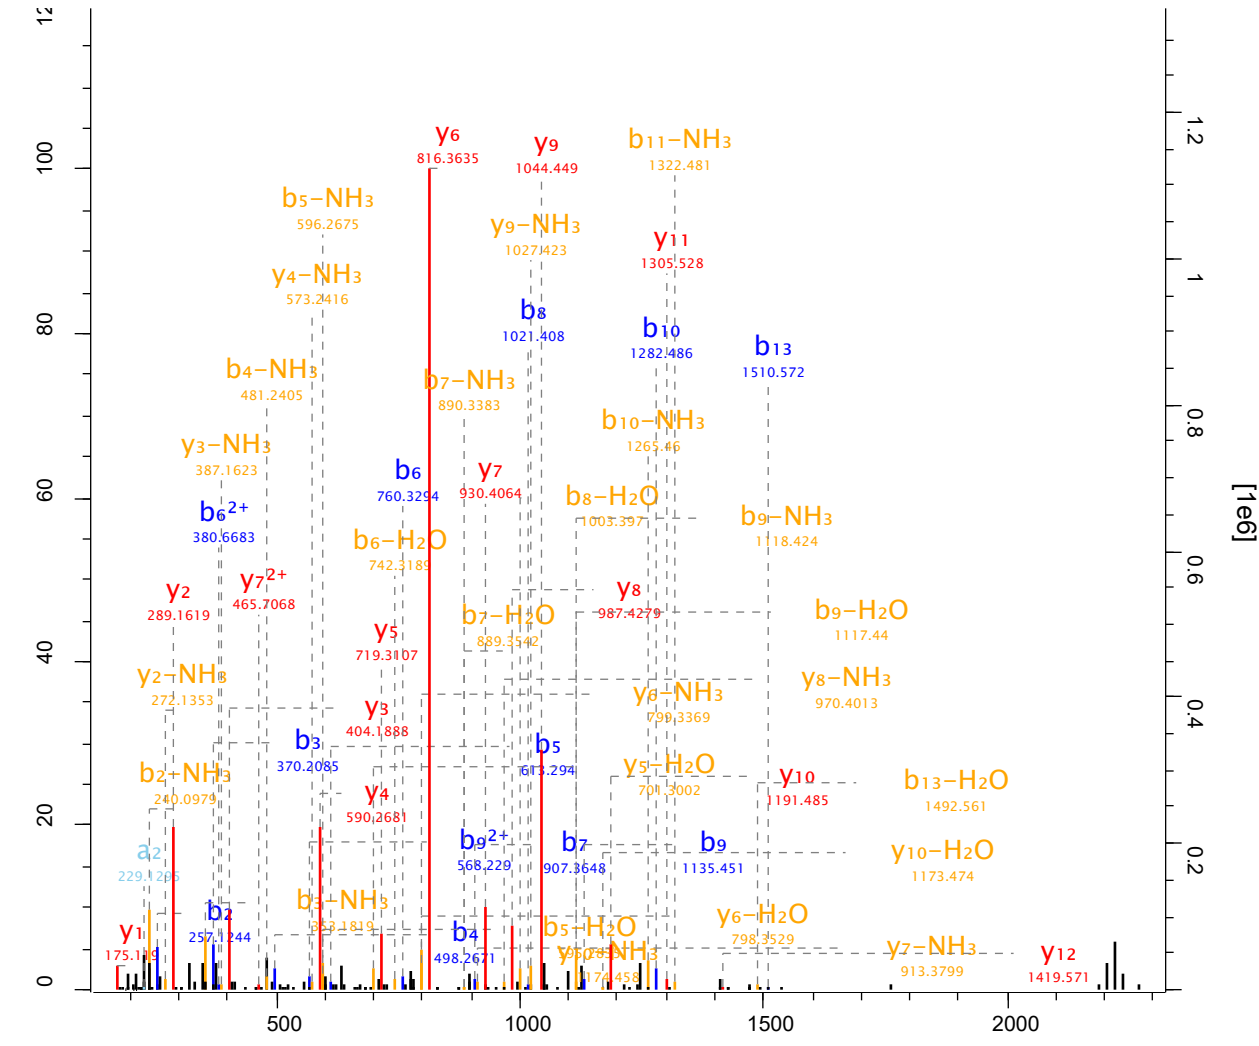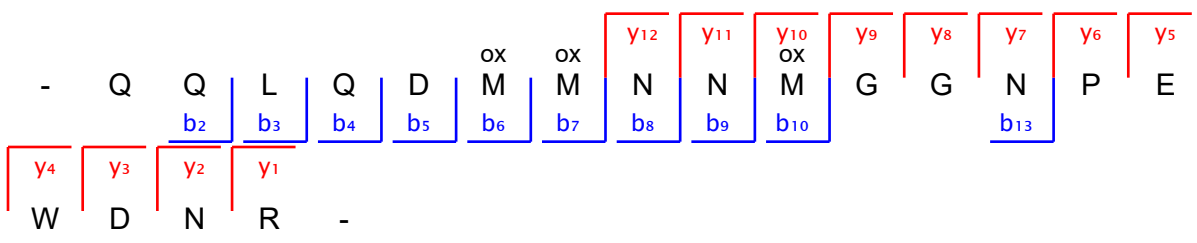

Raw file Scan Method Score m/z  
 sys\_15\_1 12713 FTMS; HCD 54.27 532.72

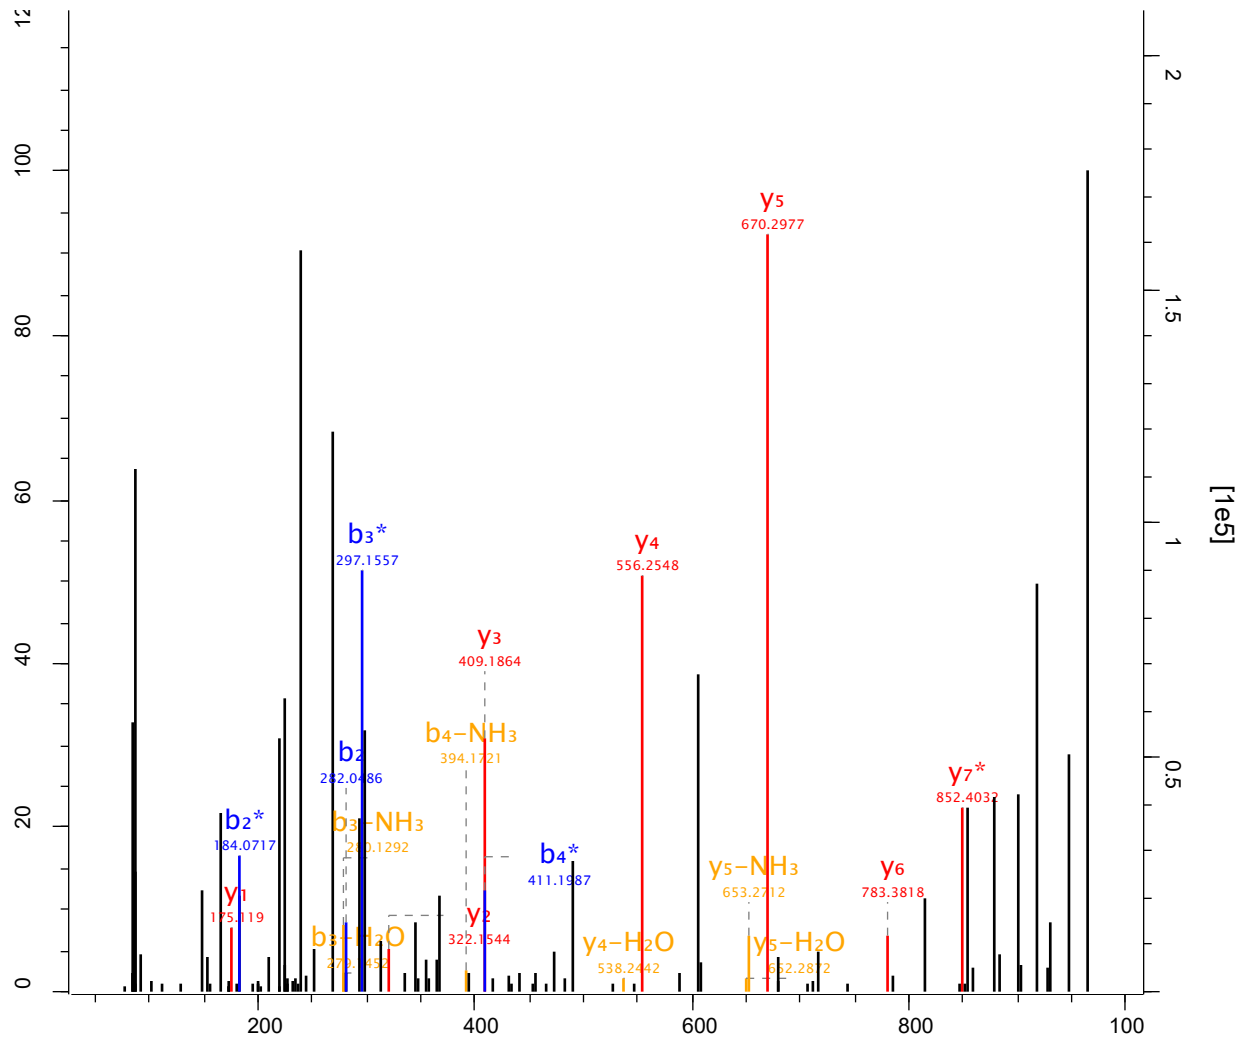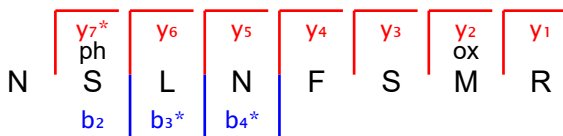

Raw file Scan Method Score m/z  
 sys\_15\_1 12735 FTMS; HCD 92.65 635.27

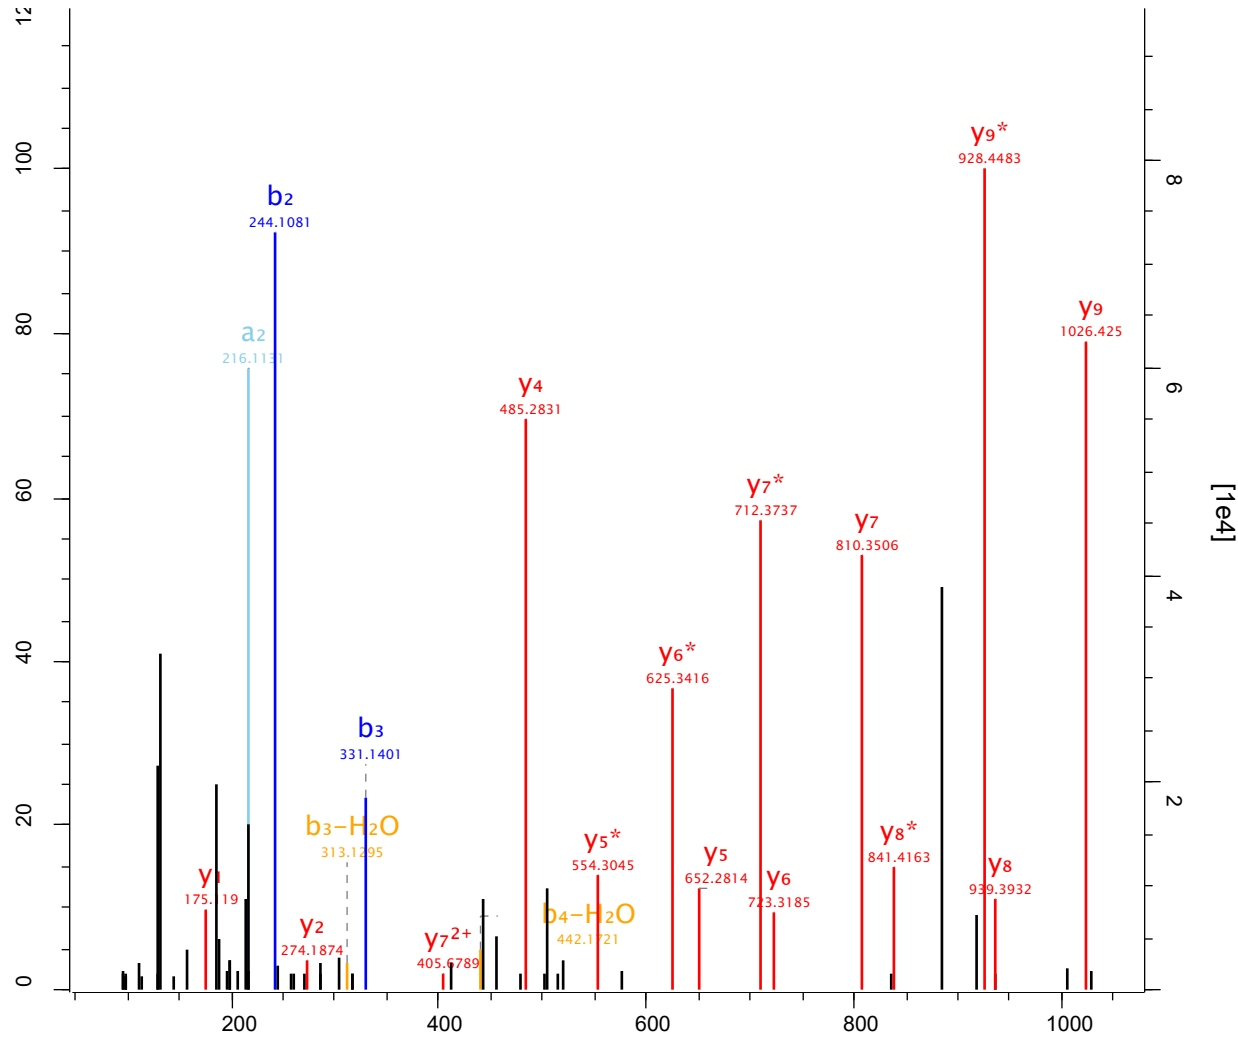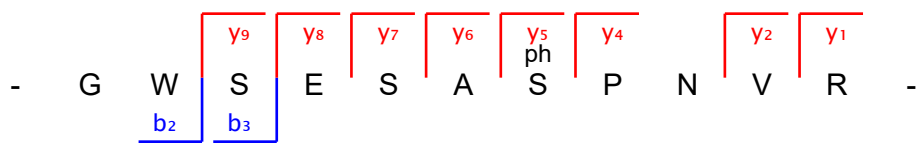

Raw file Scan Method Score m/z  
 sys\_15\_1 12905 FTMS; HCD 157.3 671.63

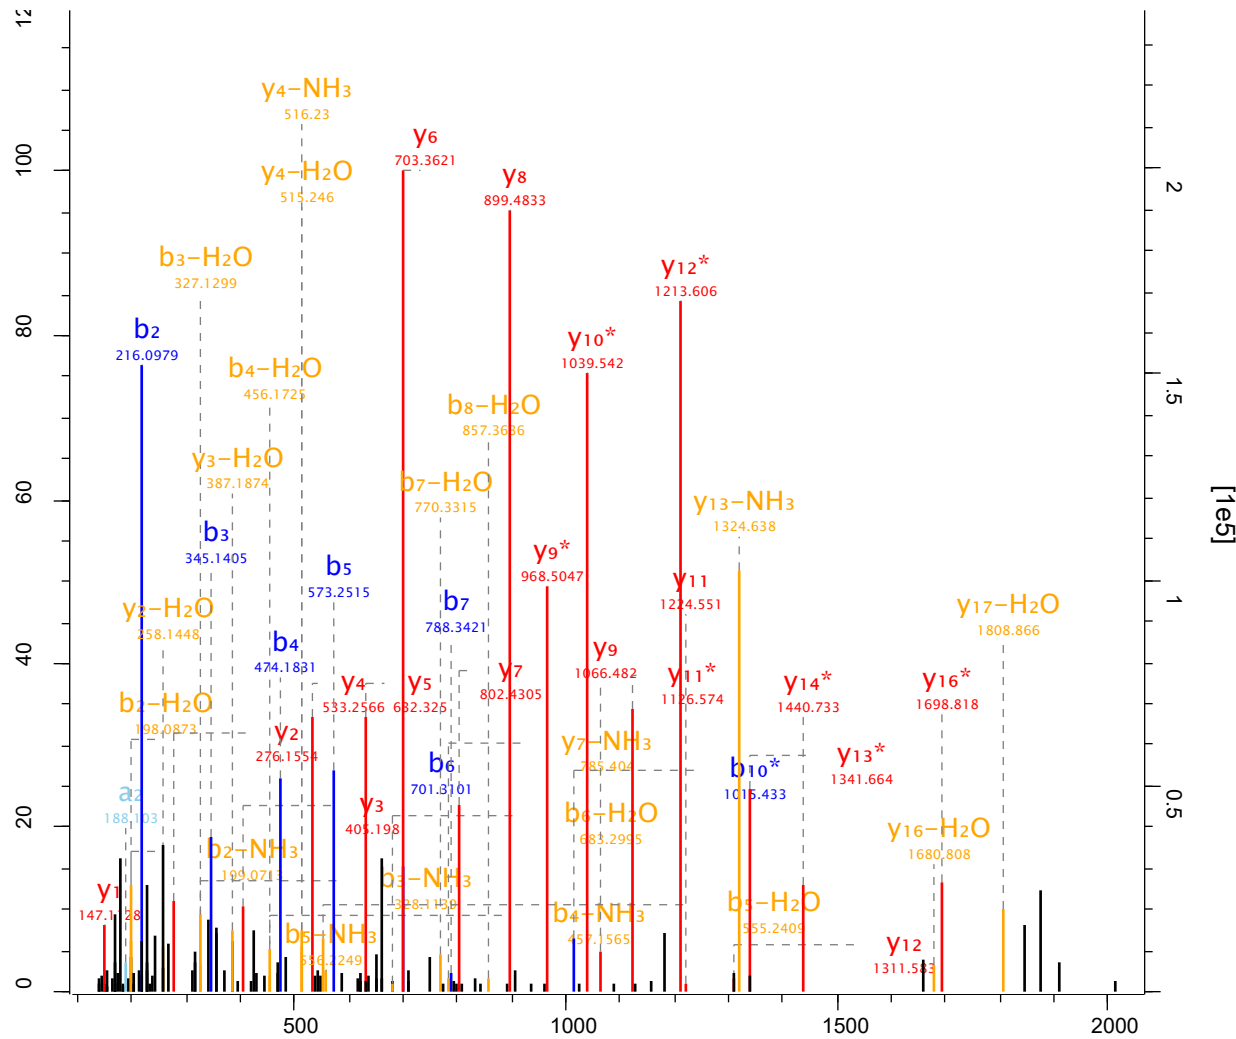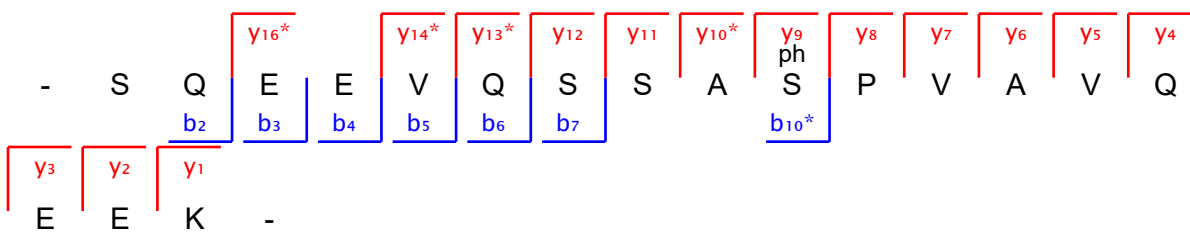

Raw file Scan Method Score m/z  
 sys\_15\_1 12913 FTMS; HCD 48.22 737.29

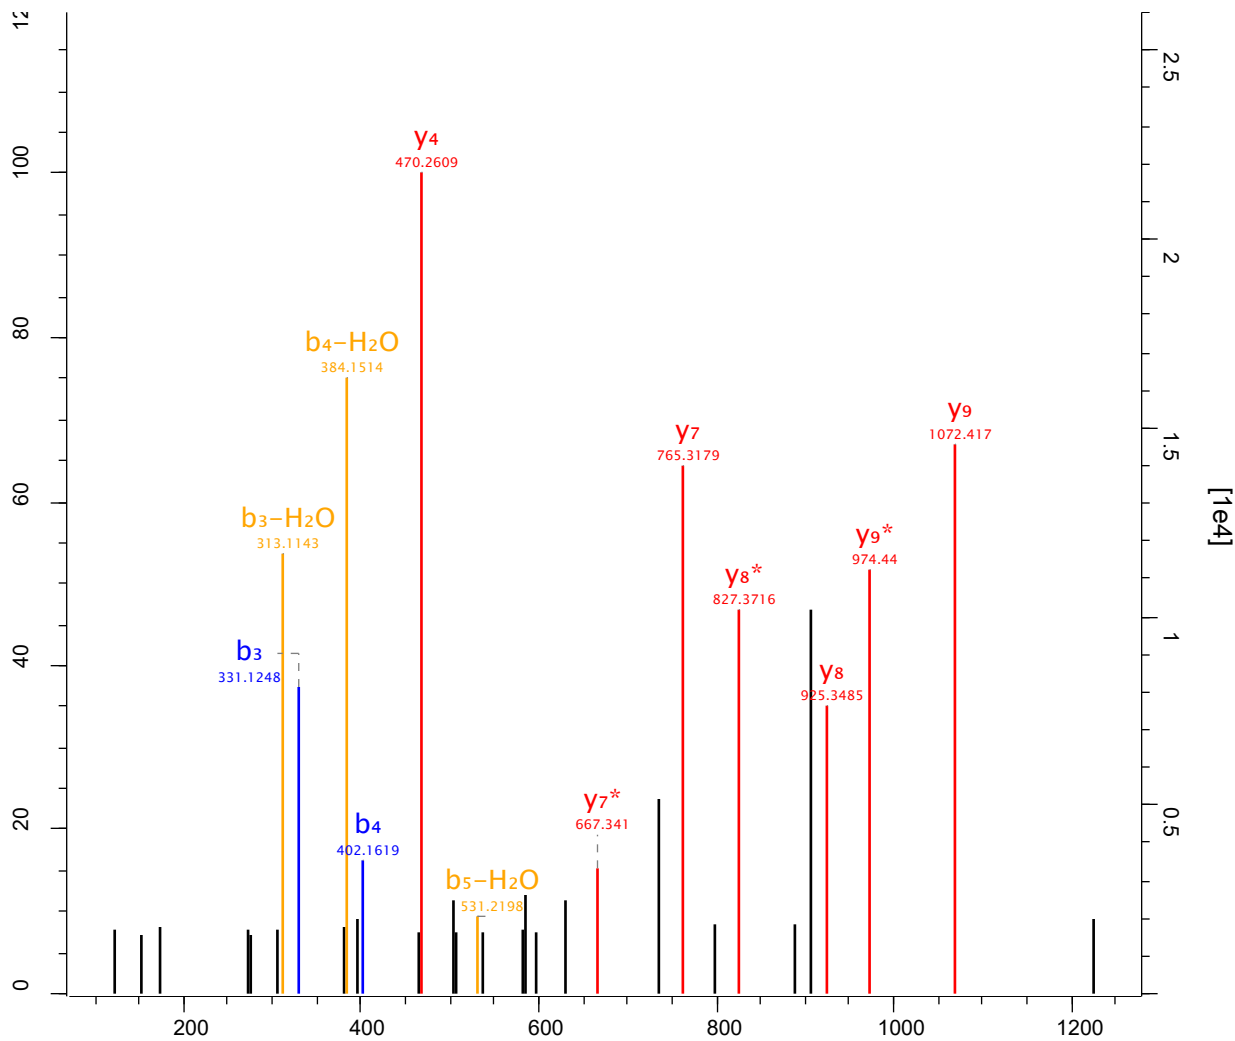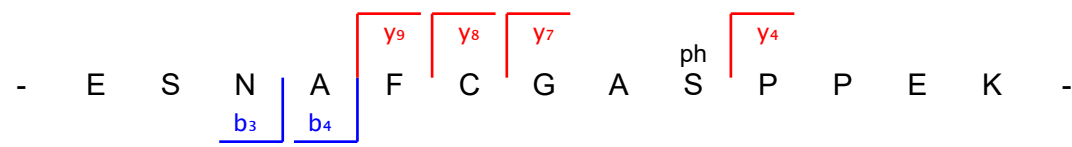

Raw file Scan Method Score m/z  
 sys\_15\_1 12918 FTMS; HCD 40.94 608.8

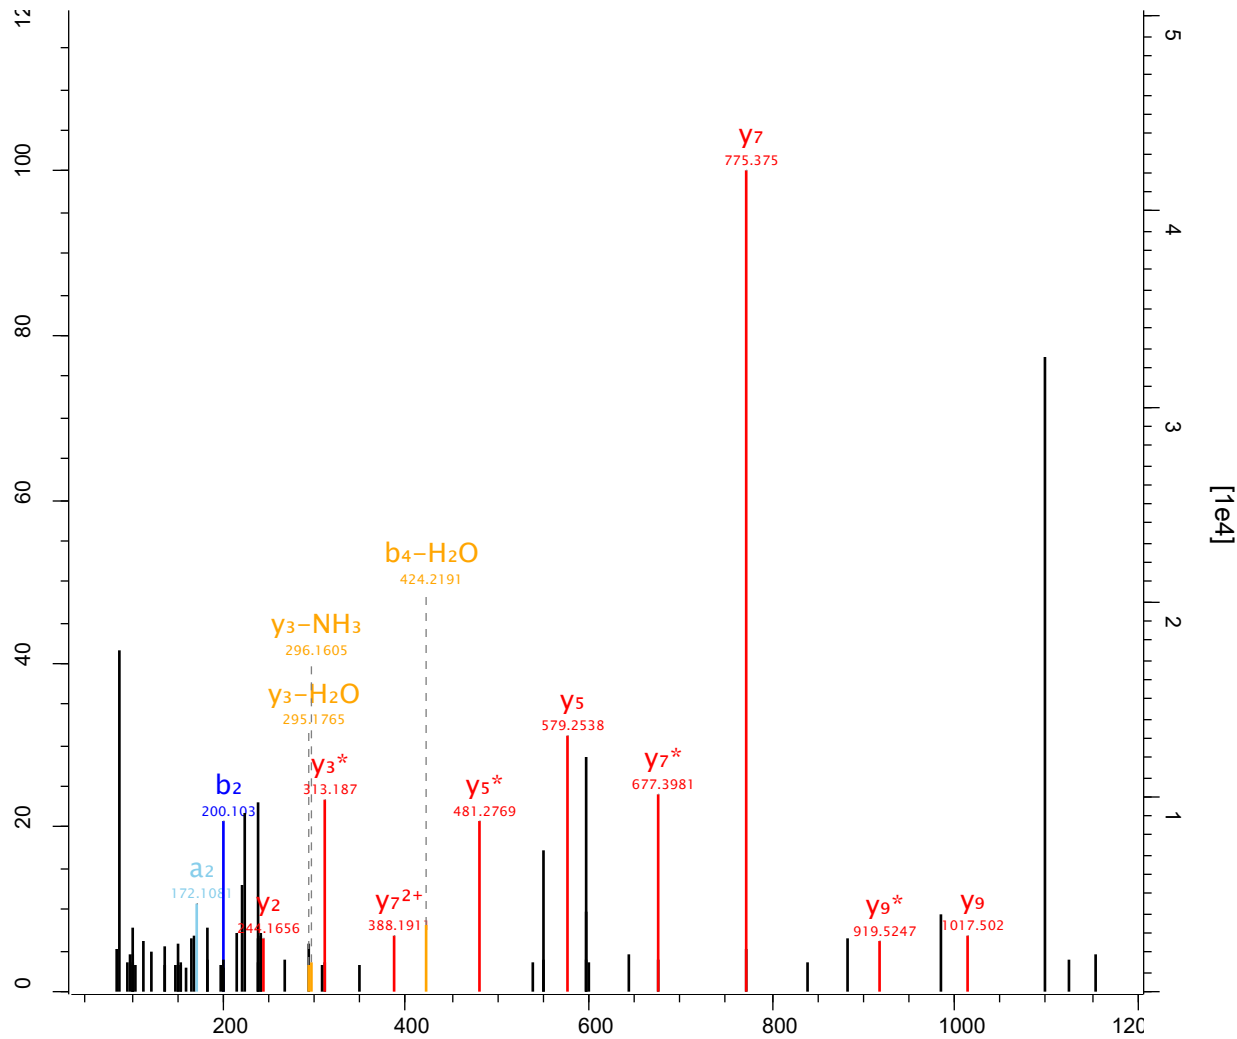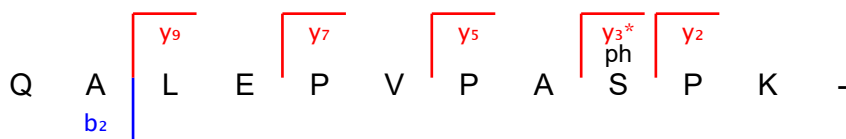



Raw file Scan Method Score m/z  
 sys\_15\_1 12998 FTMS; HCD 146.86 728.78

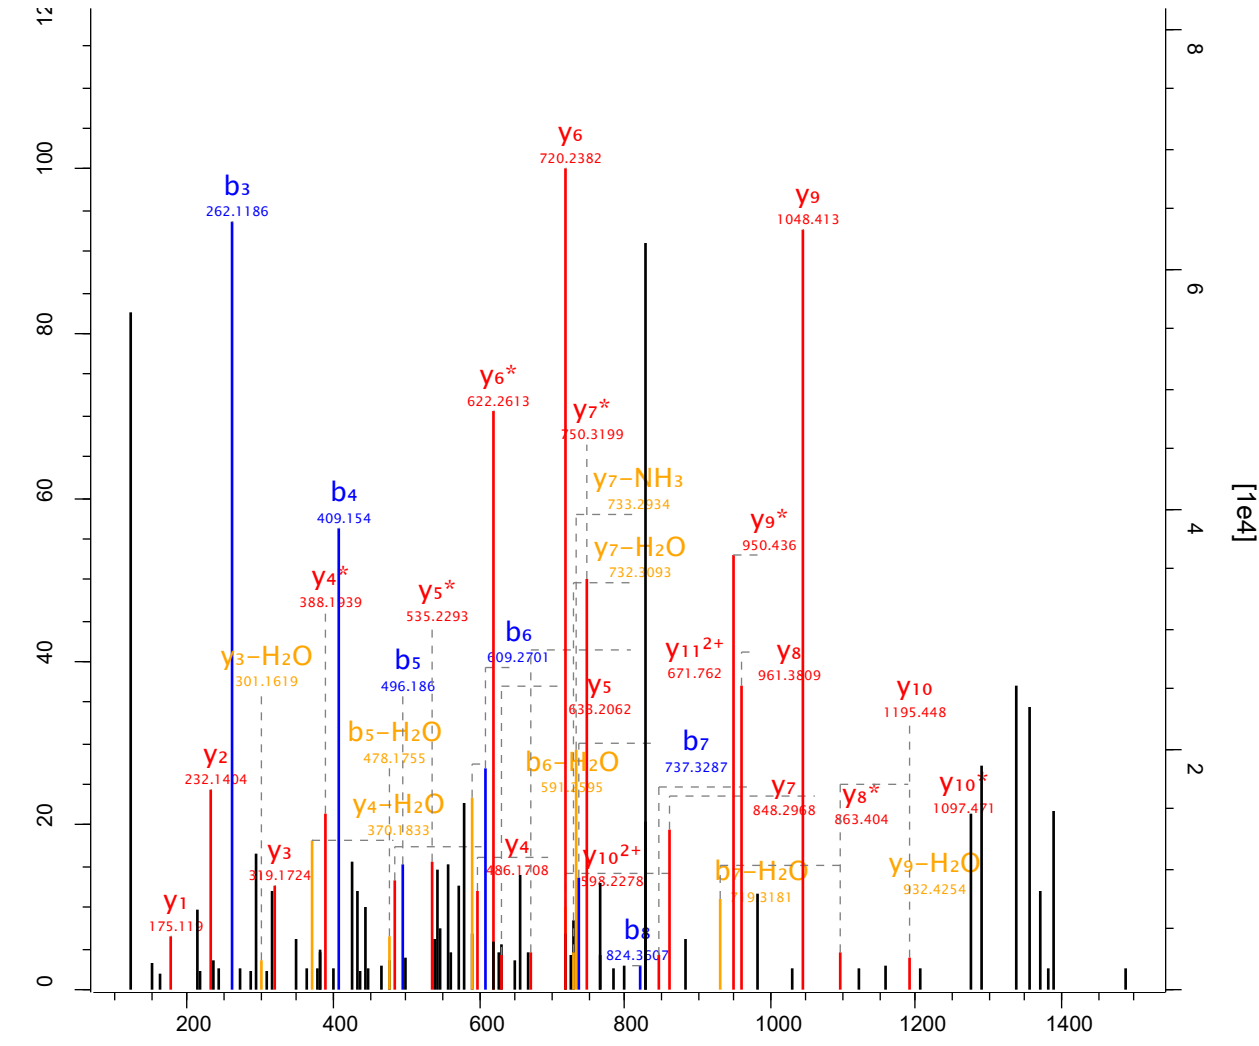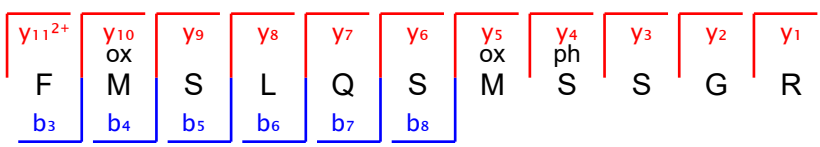

Raw file Scan Method Score m/z  
 sys\_15\_1 13068 FTMS; HCD 79.66 418.7

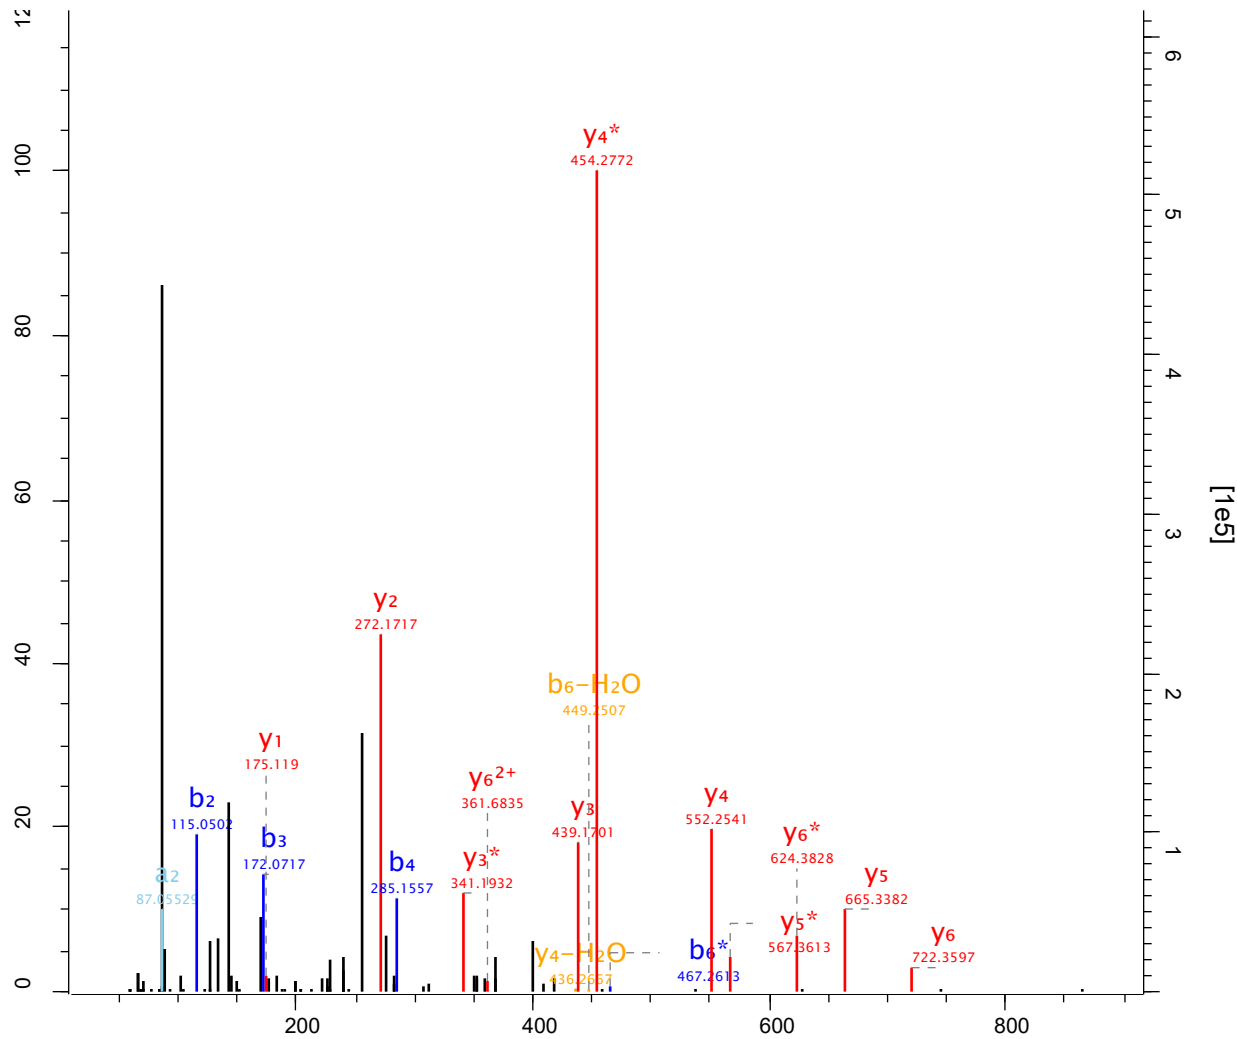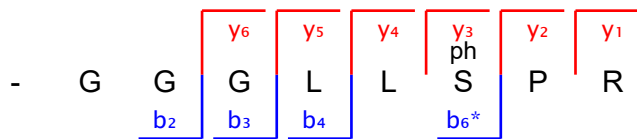

Raw file Scan Method Score m/z  
 sys\_15\_1 13098 FTMS; HCD 45.92 830.36

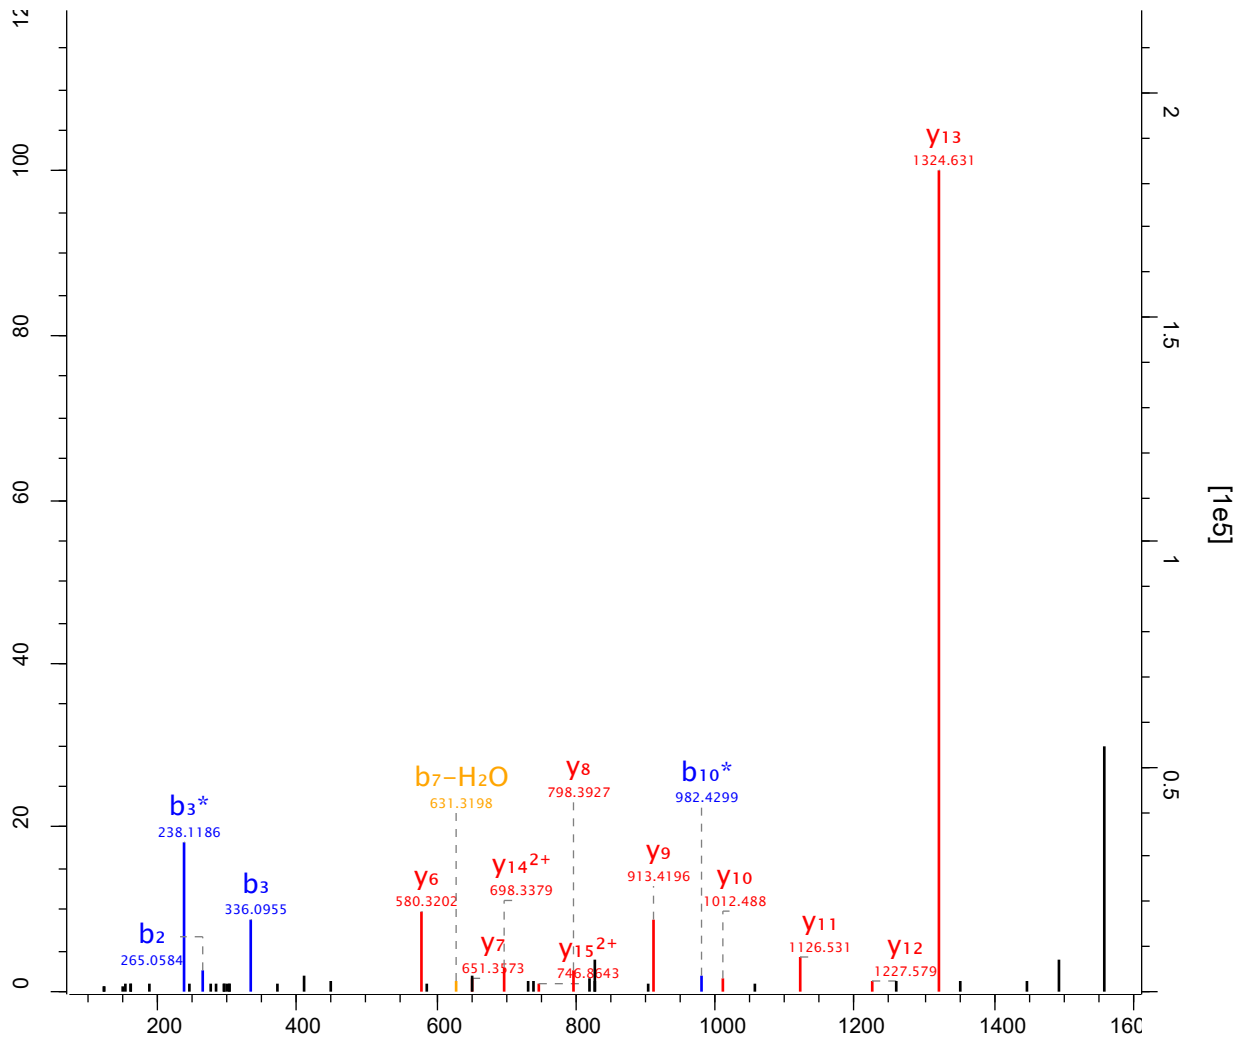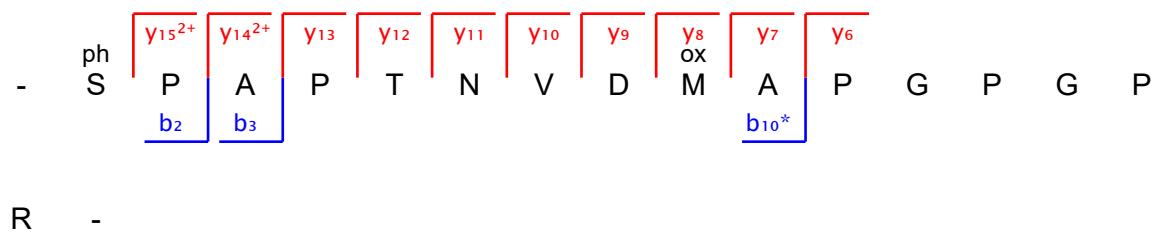

Raw file Scan Method Score m/z  
 sys\_15\_1 13100 FTMS; HCD 149.3 724.8

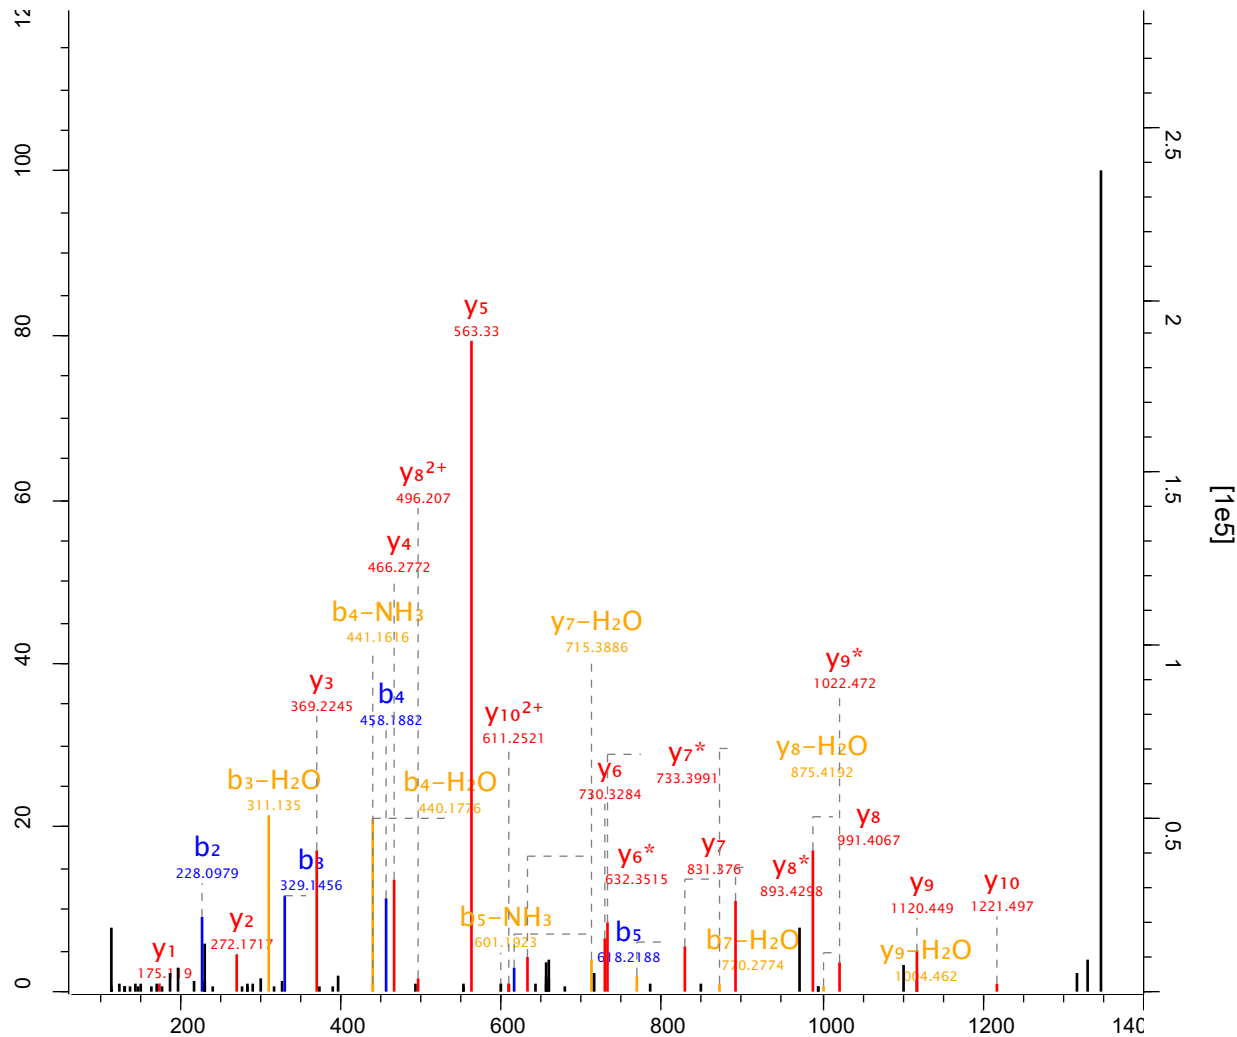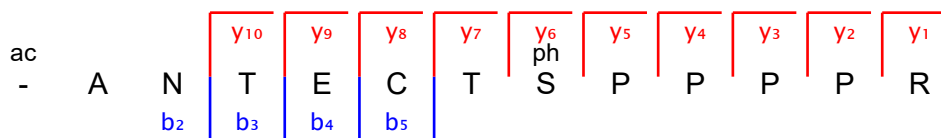

Raw file Scan Method Score m/z  
 sys\_15\_1 13106 FTMS; HCD 104.2 730.82

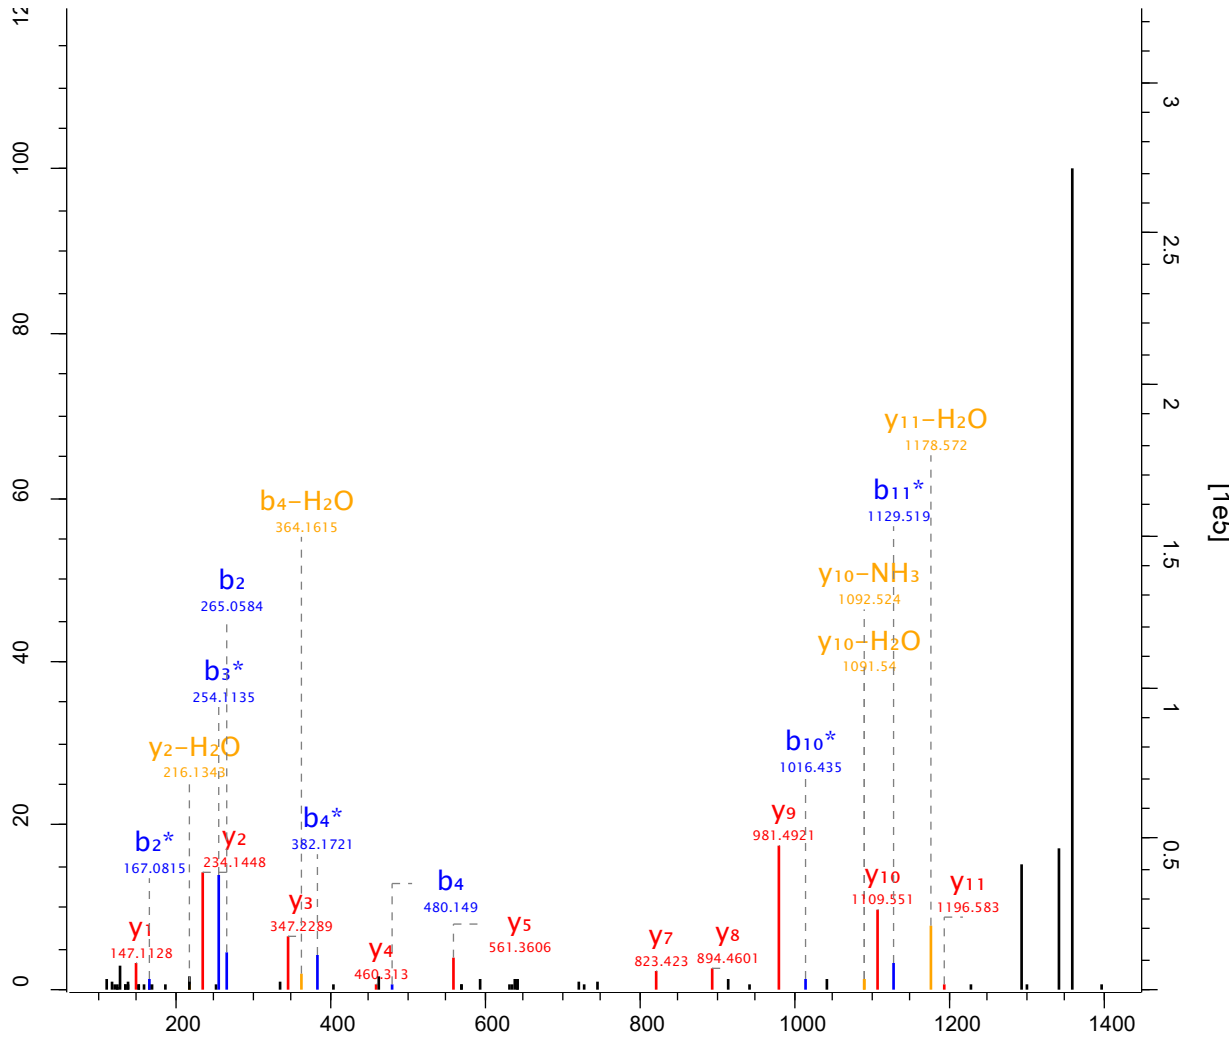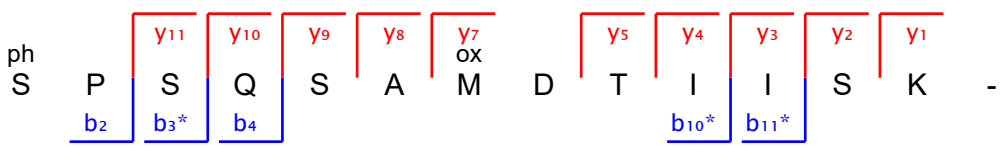

Raw file Scan Method Score m/z  
 sys\_15\_1 13210 FTMS; HCD 55.35 526.21

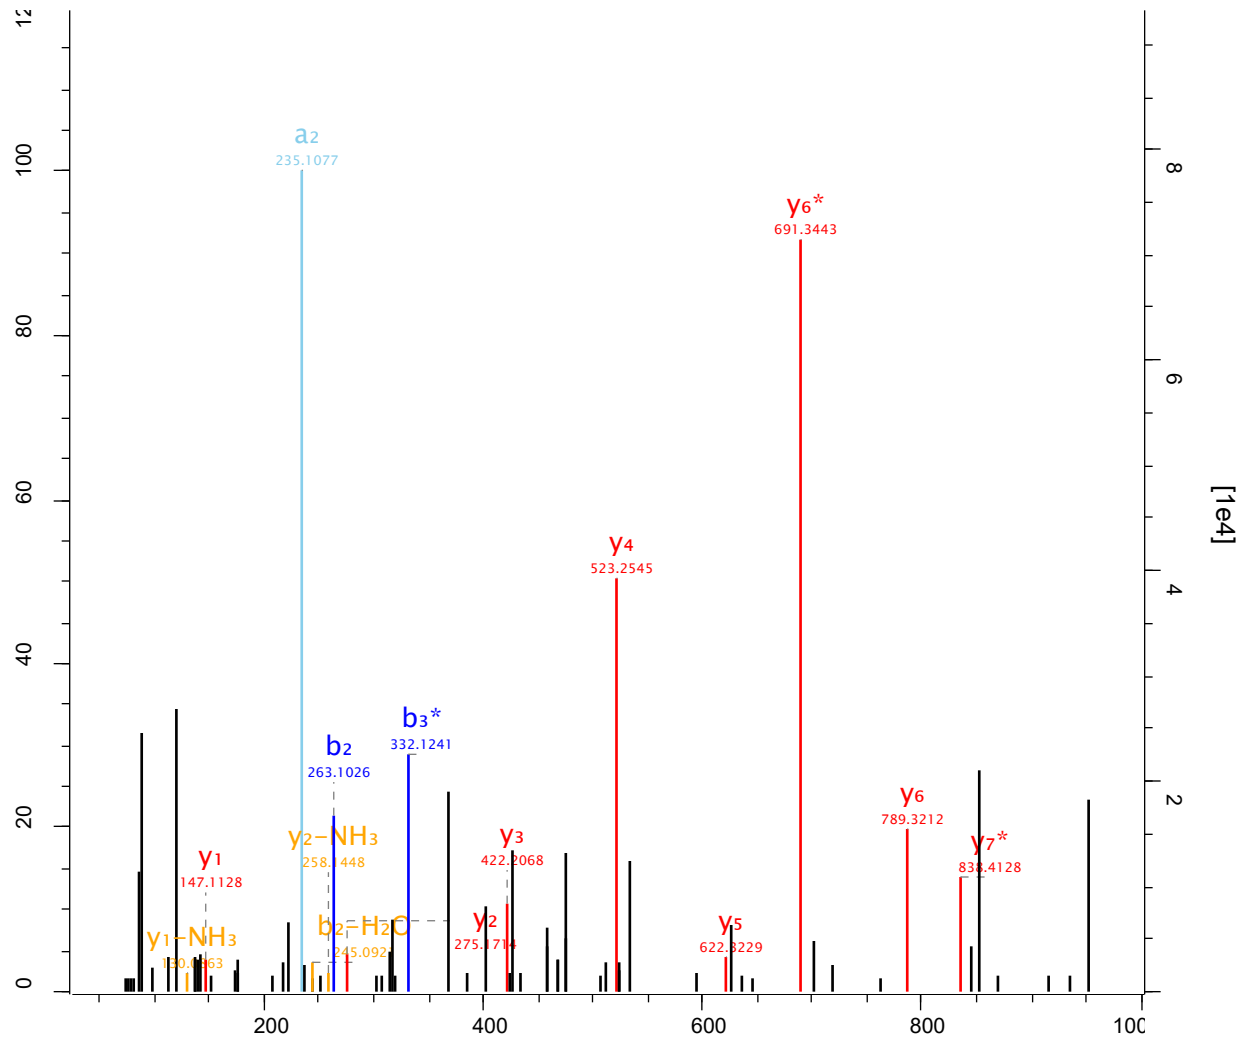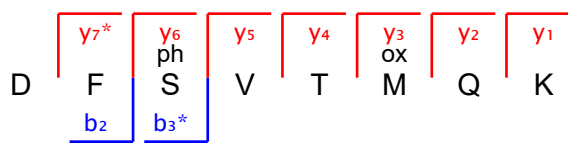

Raw file Scan Method Score m/z  
 sys\_15\_1 13283 FTMS; HCD 179.5 577.28

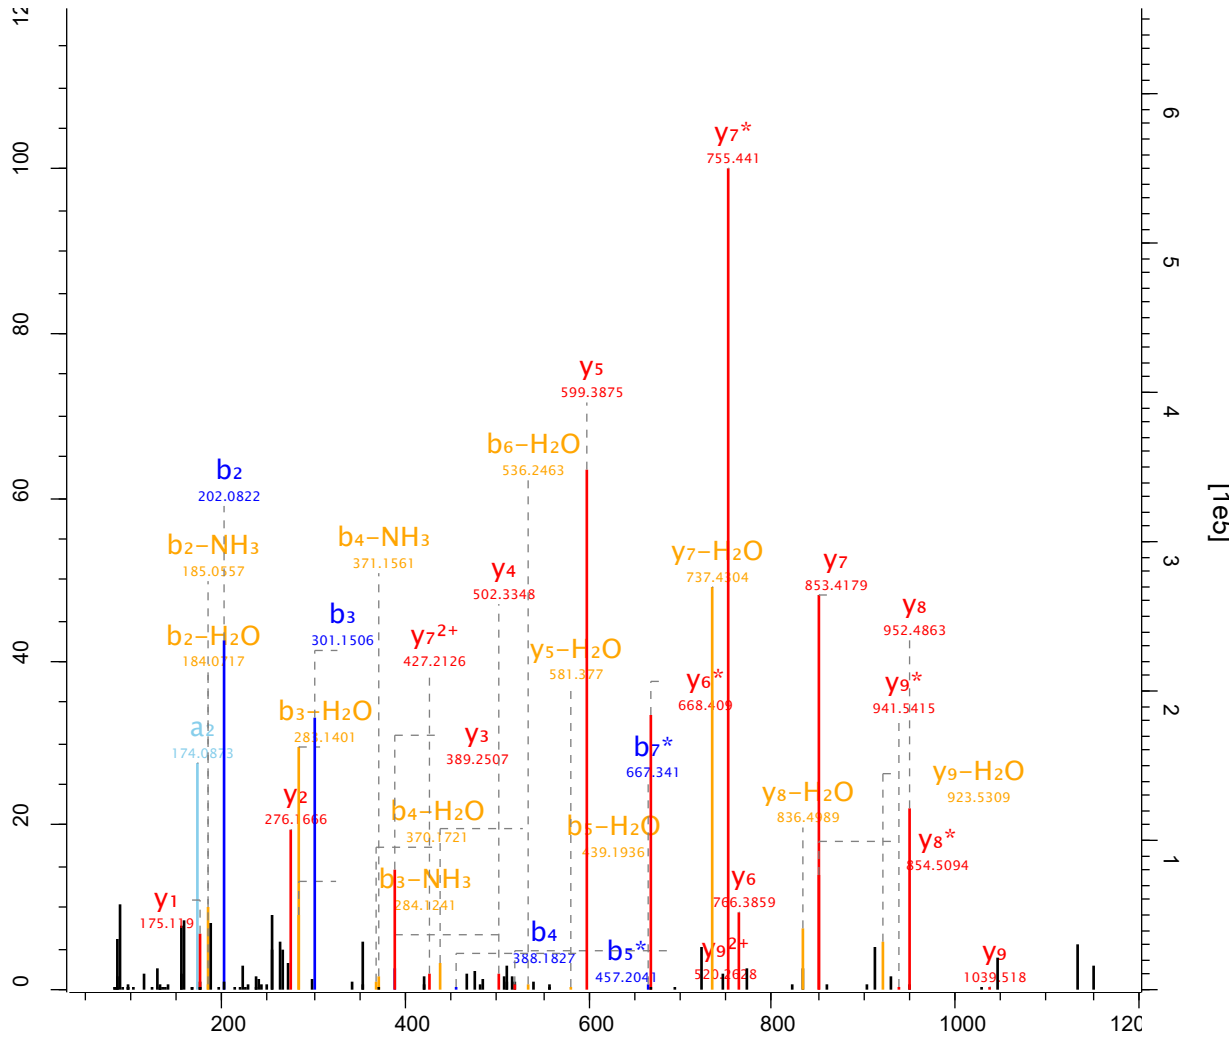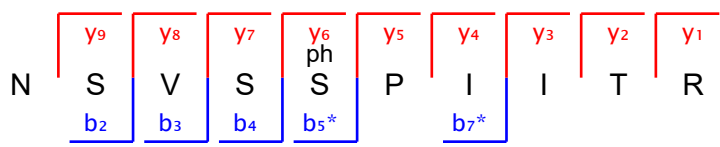

Raw file Scan Method Score m/z  
 sys\_15\_1 13304 FTMS; HCD 100.93 535.25

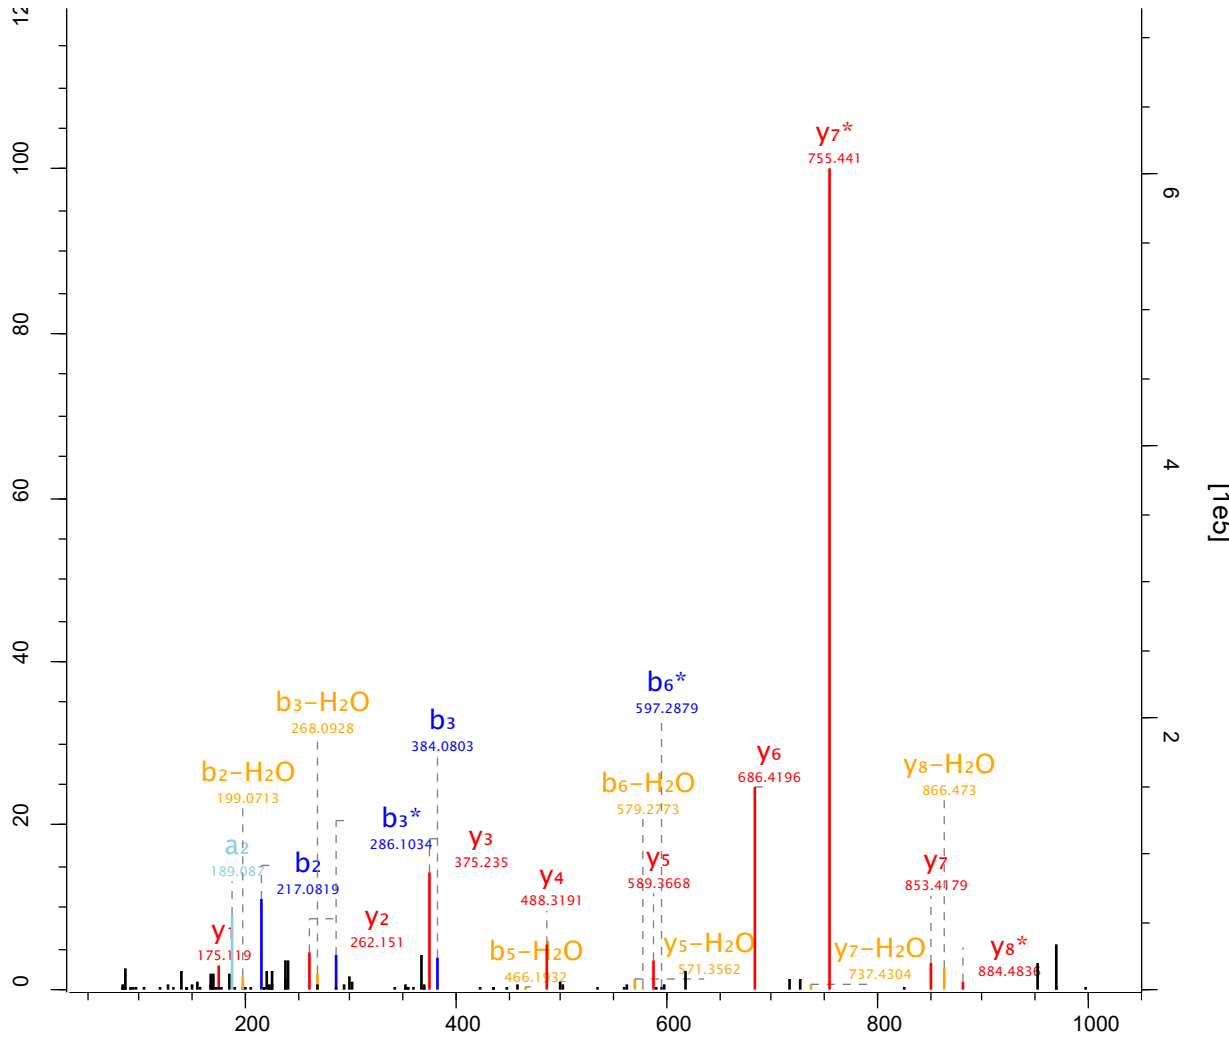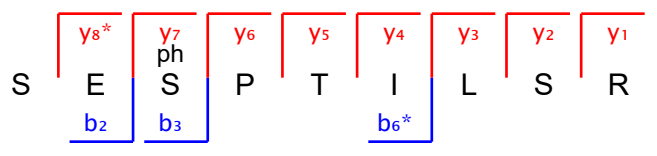



Raw file Scan Method Score m/z  
 sys\_15\_1 13322 FTMS; HCD 146.15 721.27

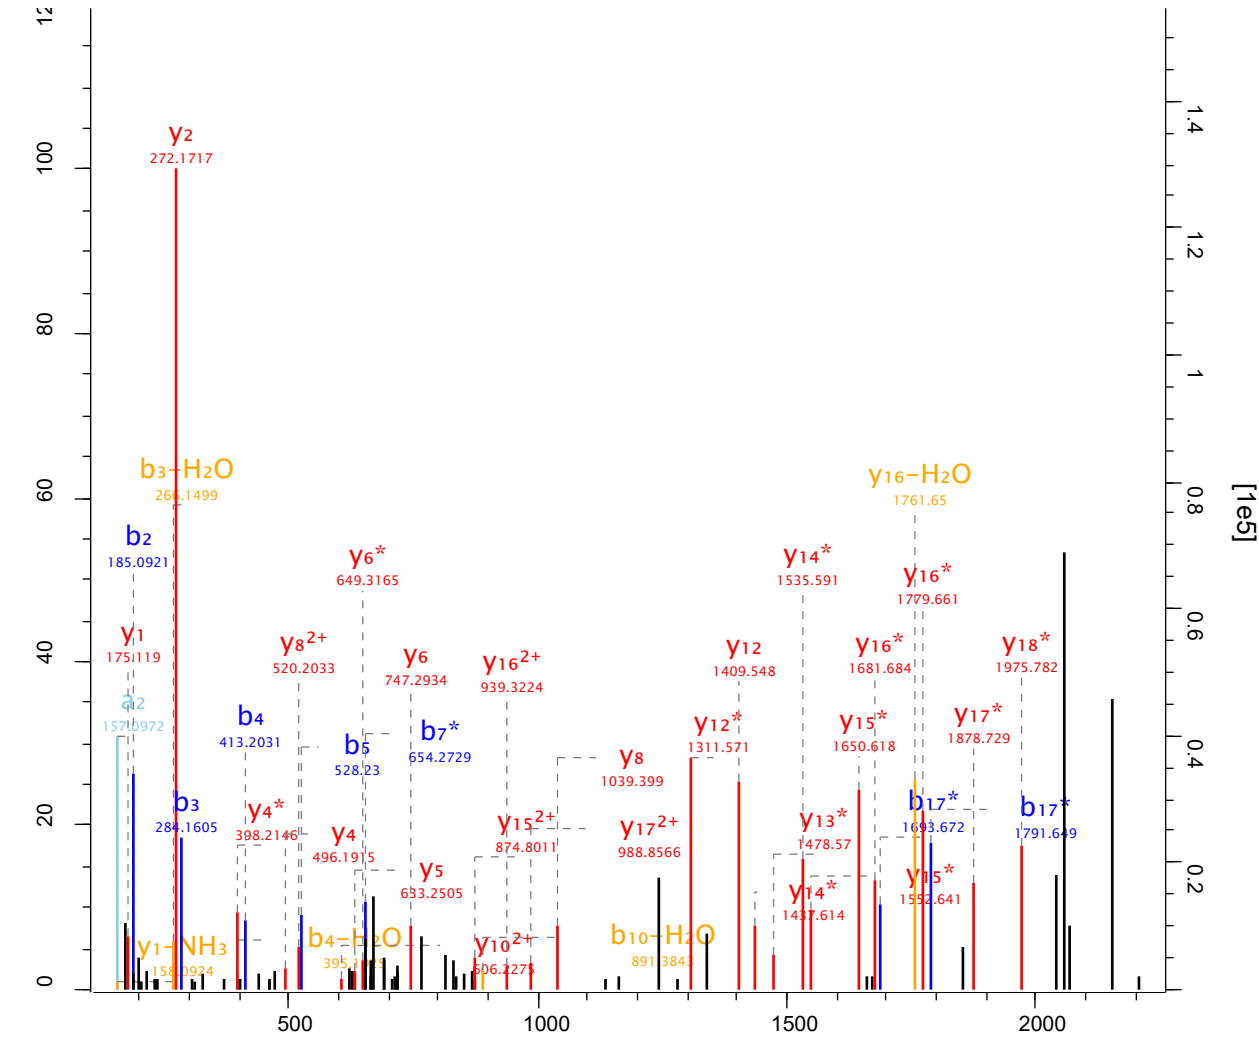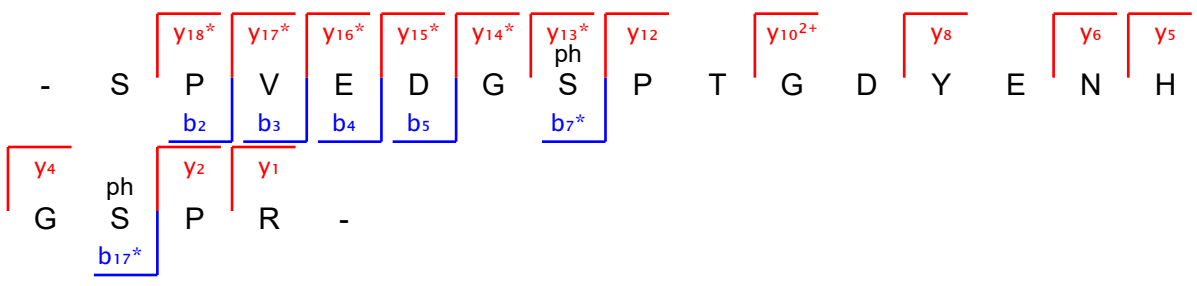

Raw file Scan Method Score m/z  
 sys\_15\_1 13388 FTMS; HCD 92.38 683.29

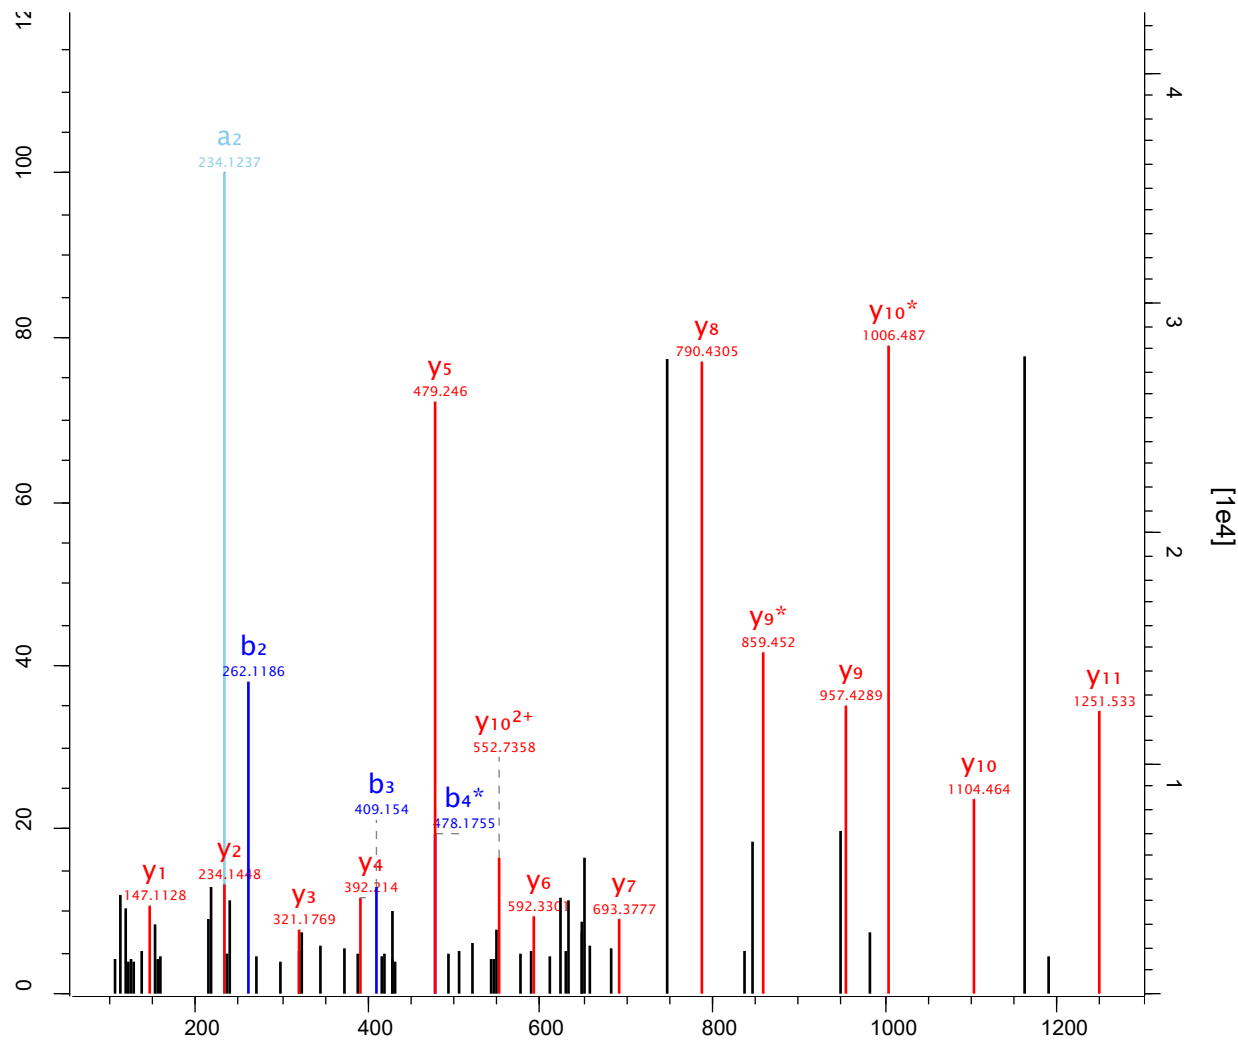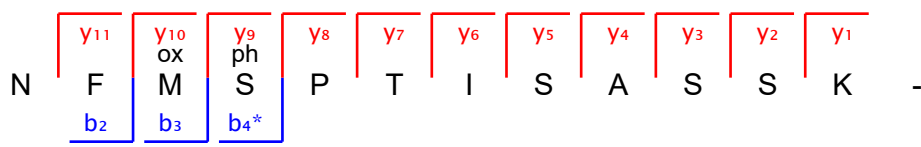

Raw file Scan Method Score m/z  
 sys\_15\_1 13479 FTMS; HCD 126.8 898.4

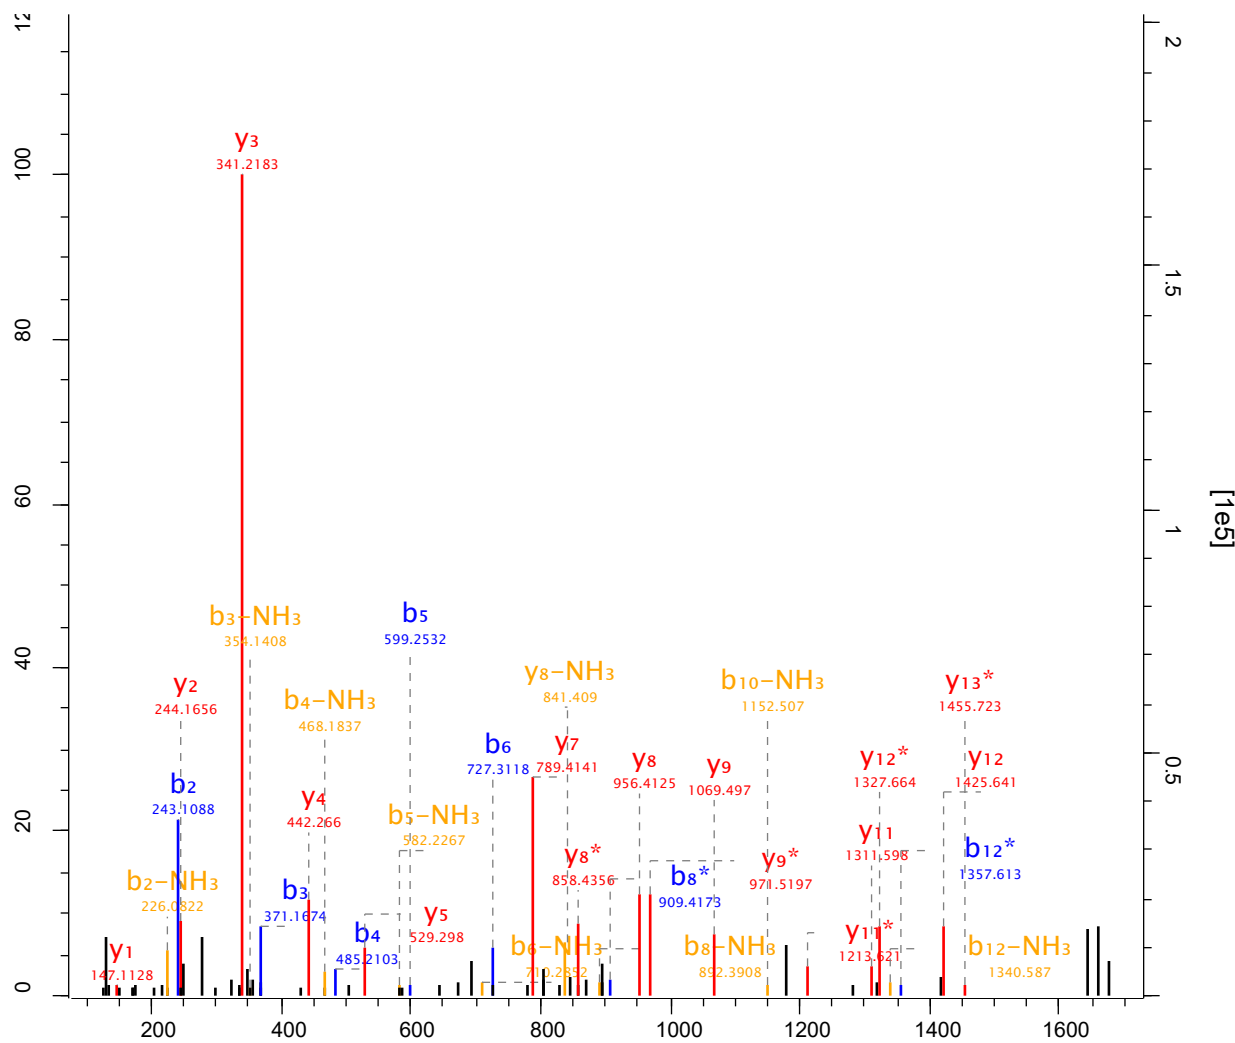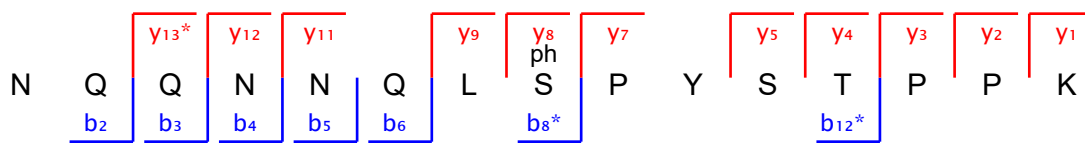

Raw file Scan Method Score m/z  
 sys\_15\_1 13716 FTMS; HCD 50.15 488.23

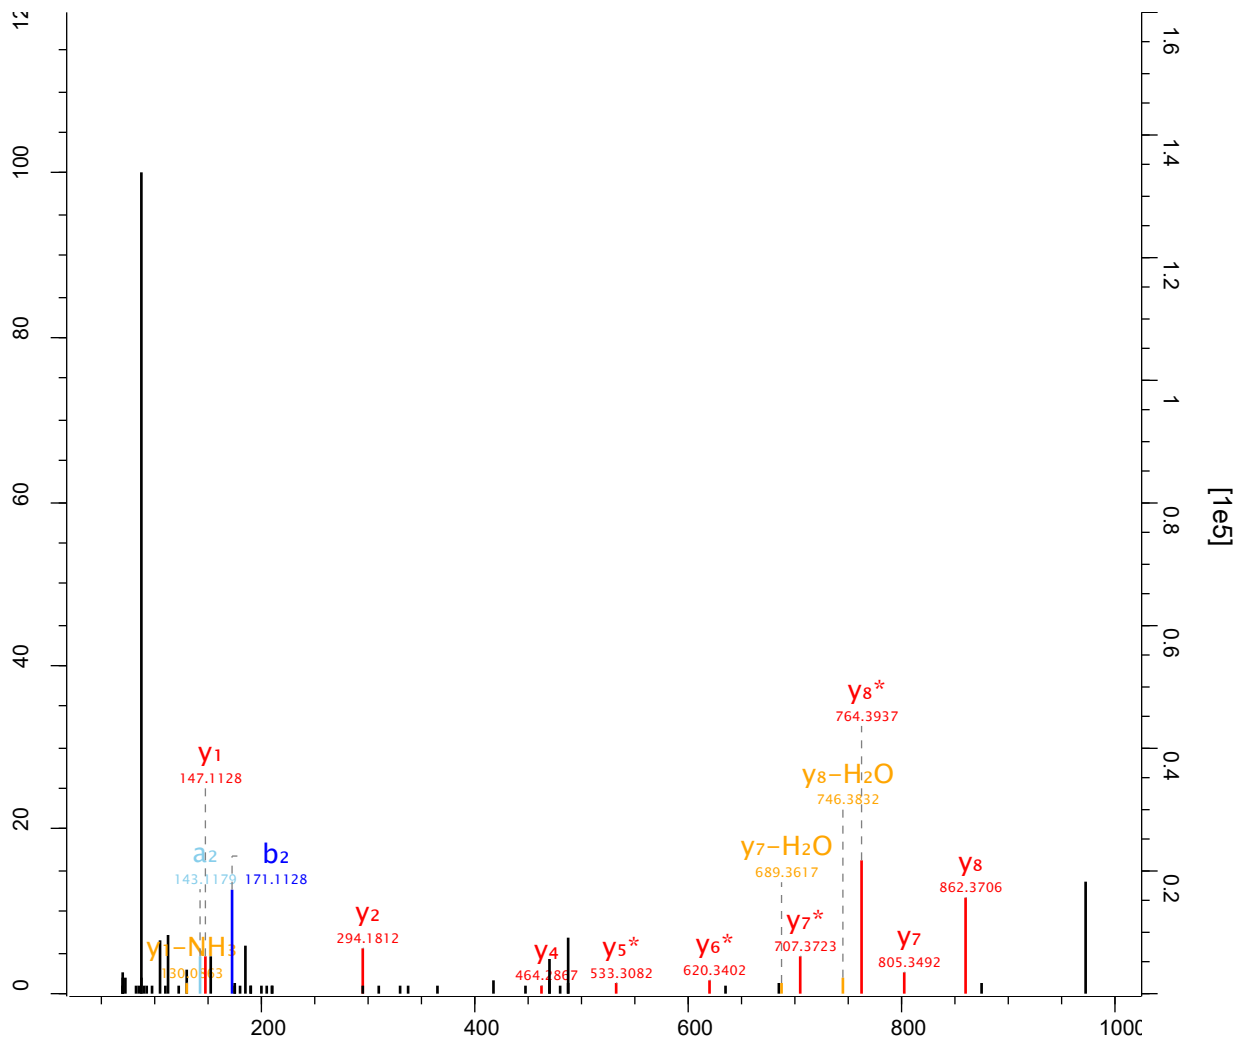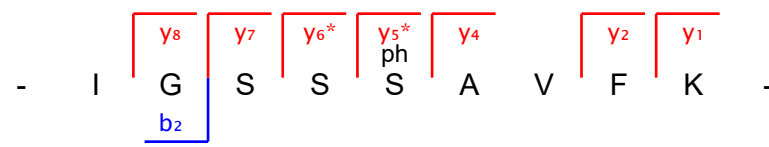

Raw file Scan Method Score m/z  
 sys\_15\_1 13820 FTMS; HCD 144.8 662.24

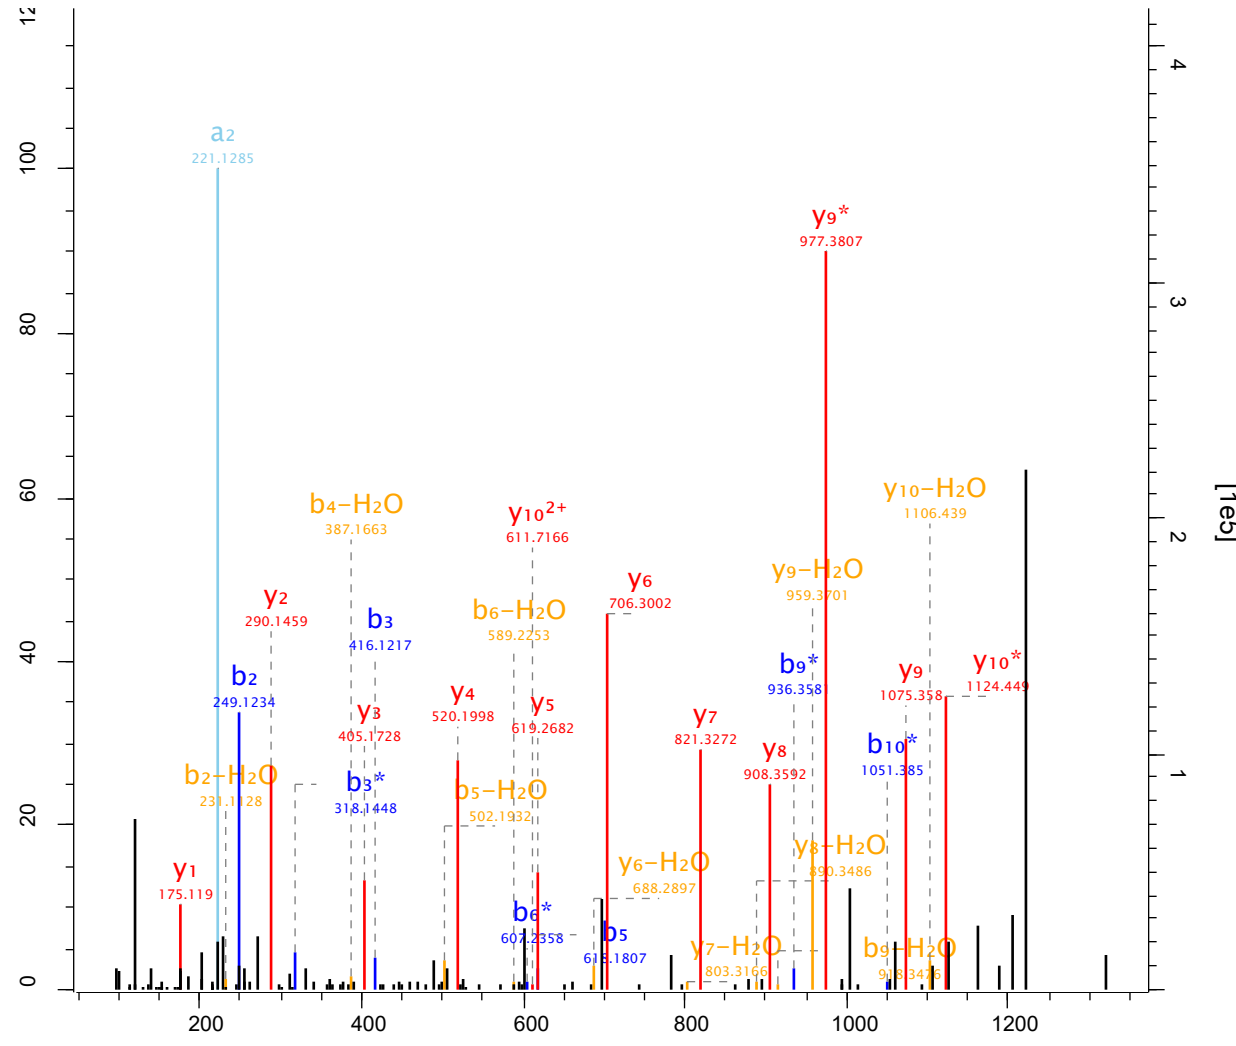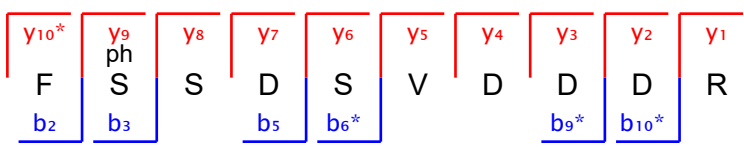

Raw file Scan Method Score m/z  
 sys\_15\_1 13846 FTMS; HCD 97.77 577.27

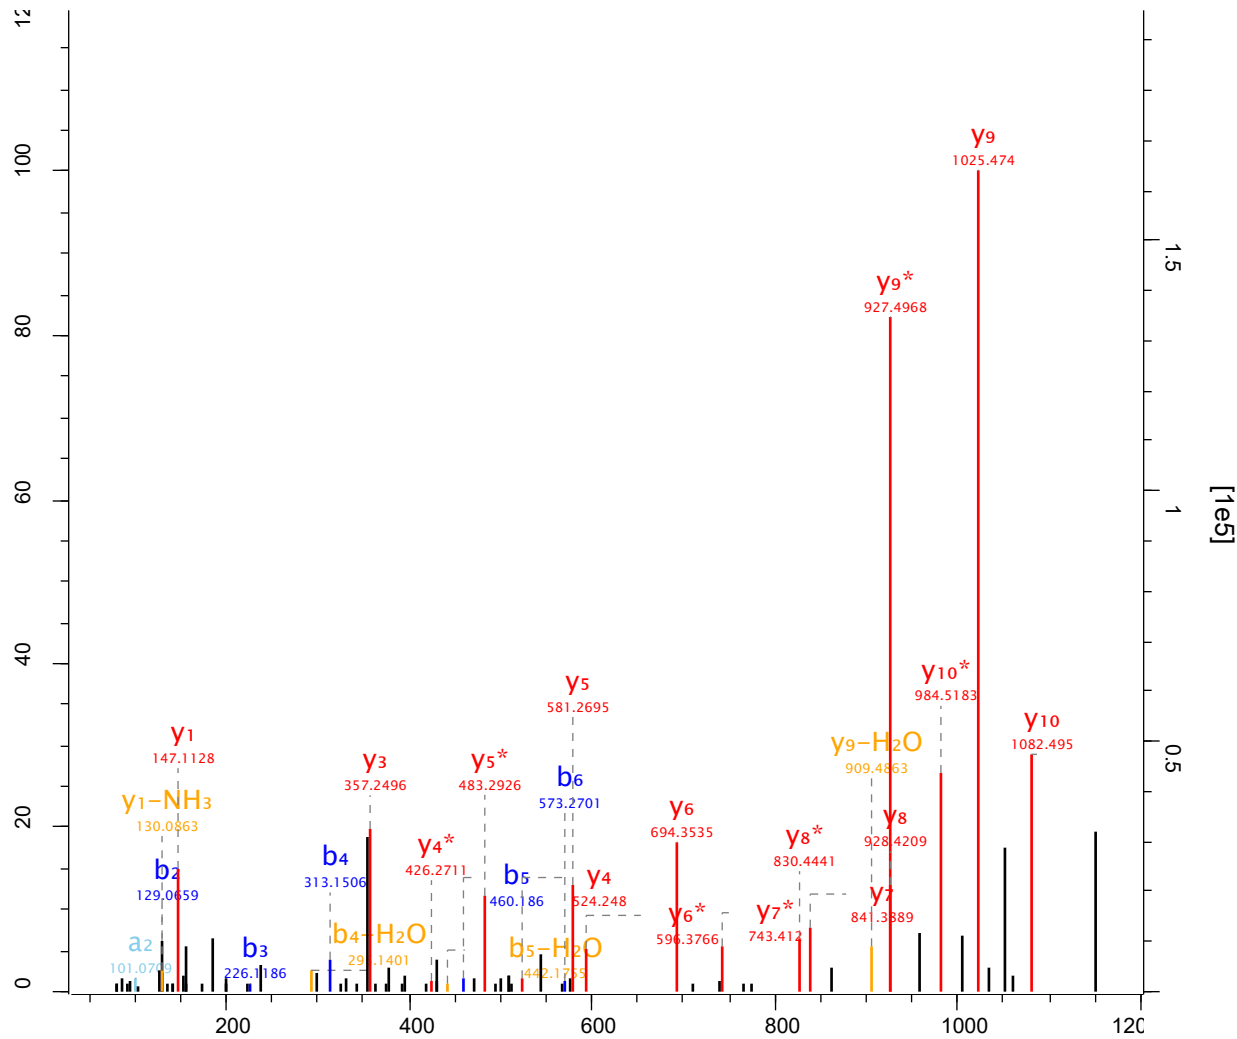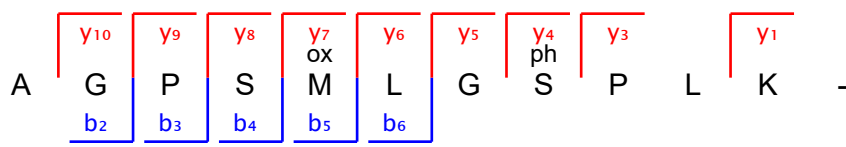

Supplement: 143488_2_supp_337933_ps5hgl.pdf [file 143488_2_supp_337933_ps5hgl.pdf]
