# Supplementary material for: The Systemin Signaling Cascade As Derived from Time Course Analyses of the Systemin-responsive Phosphoproteome
Source: PubMed Central journal article supplement (PMC6683004; doi:10.1074/mcp.ra119.001367), 2019-05-28
Supplement: 143488_2_supp_334092_ps5gg2.pdf [file 143488_2_supp_334092_ps5gg2.pdf]

Raw file Scan Method Score m/z  
 fatima\_01-MPK2 25791 FTMS; HCD 231.13 773.86

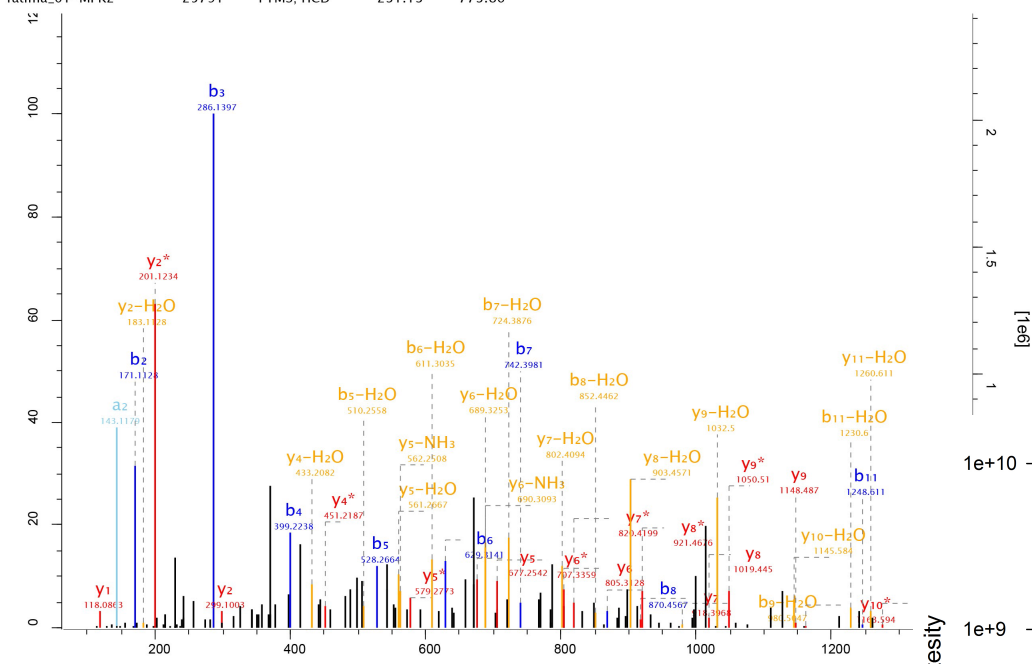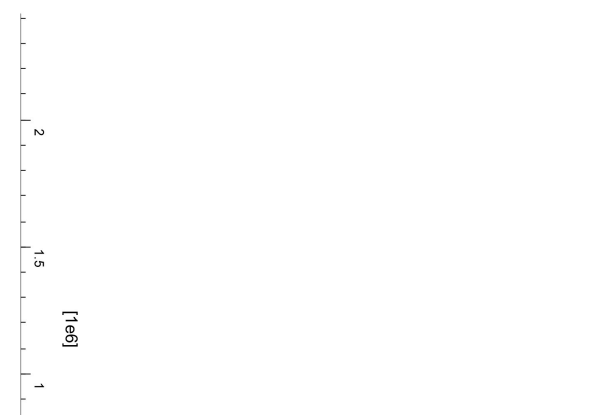

Raw file Scan Method Score m/z  
 fatima\_09-POL5 30048 FTMS; HCD 245.15 733.87

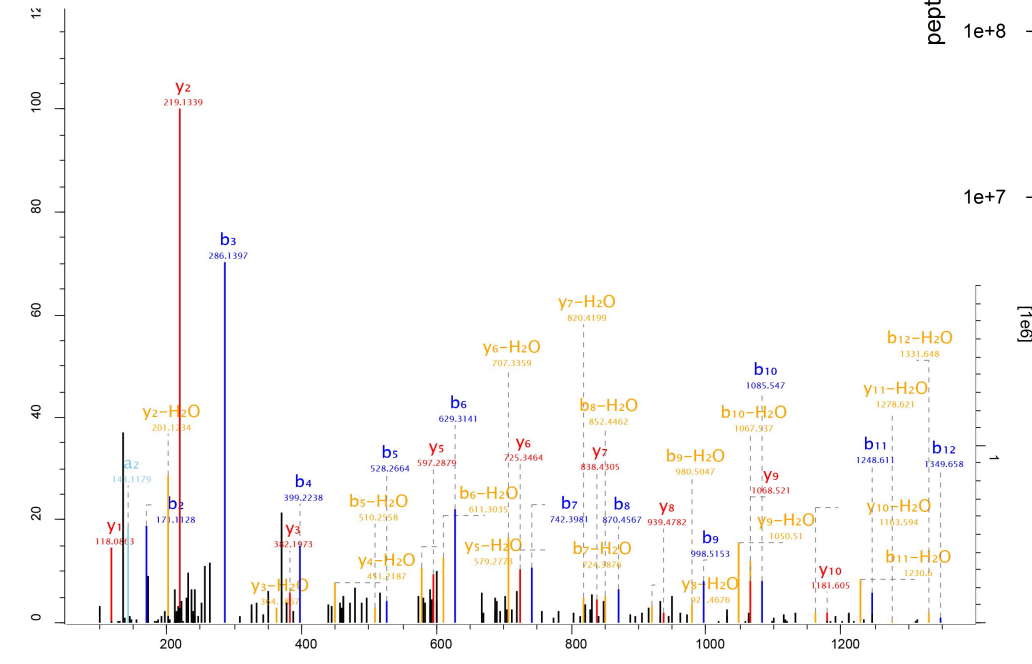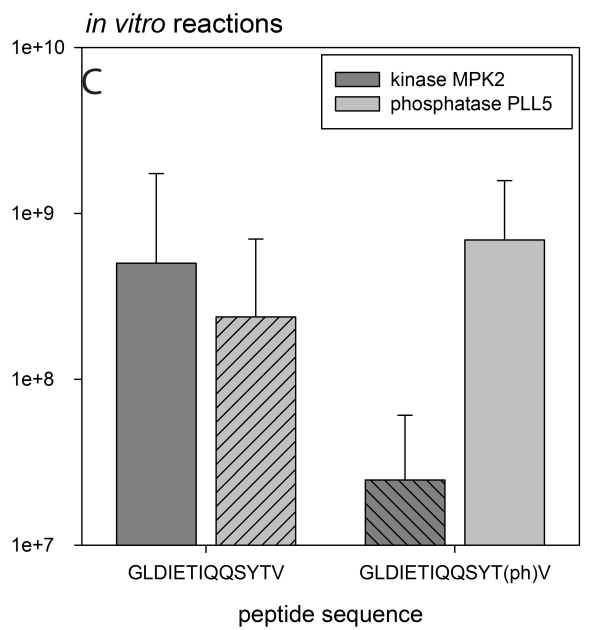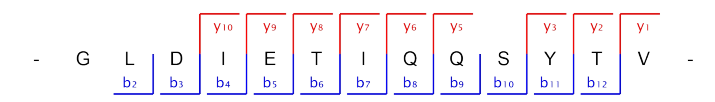

Supplementary Figure S3
