# Supplementary material for: The Systemin Signaling Cascade As Derived from Time Course Analyses of the Systemin-responsive Phosphoproteome
Source: PubMed Central journal article supplement (PMC6683004; doi:10.1074/mcp.ra119.001367), 2019-05-28
Supplement: 143488_2_supp_334093_ps5gg2.pdf [file 143488_2_supp_334093_ps5gg2.pdf]

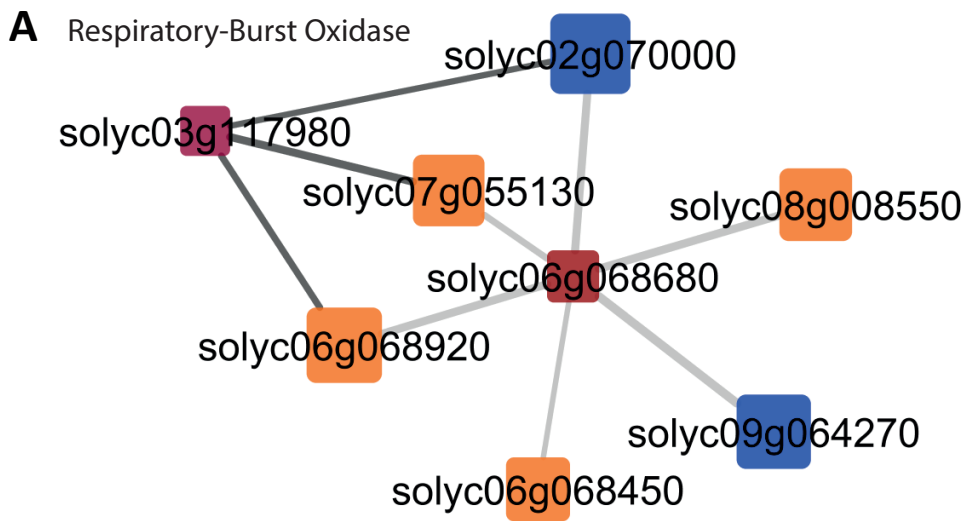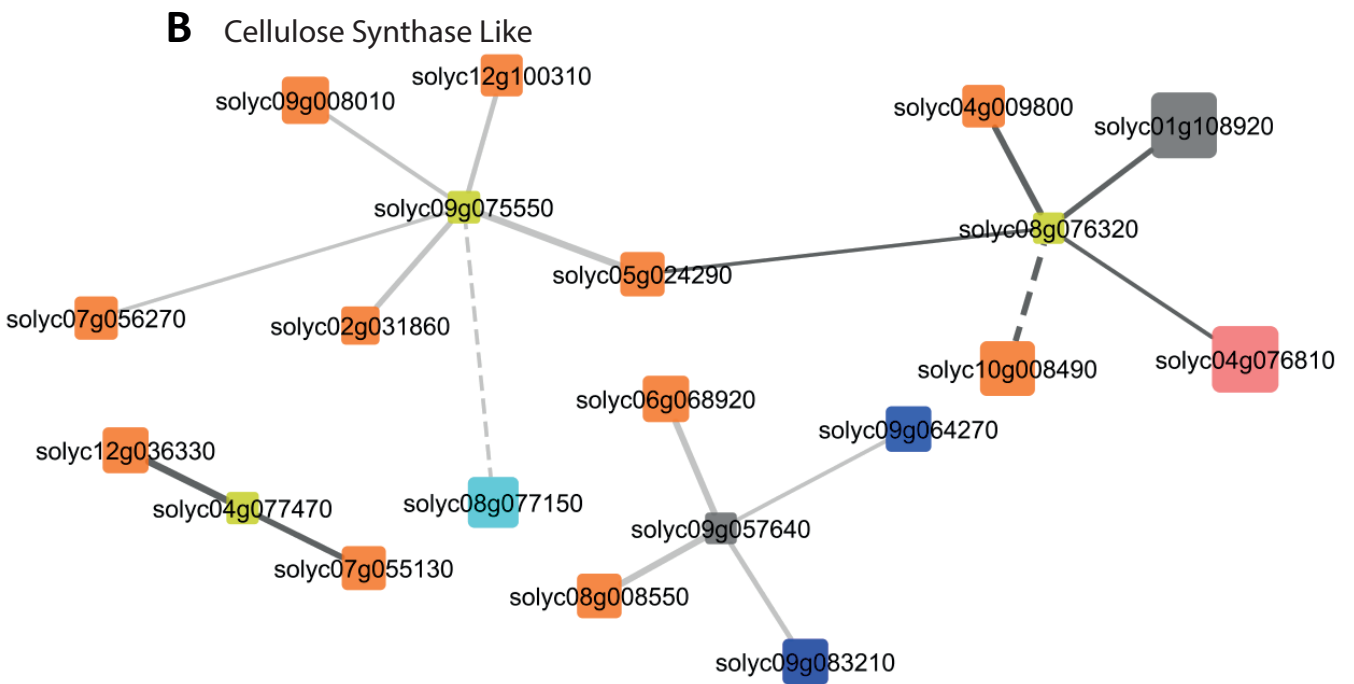

Supplementary Figure S4
