# Supplementary material for: The Systemin Signaling Cascade As Derived from Time Course Analyses of the Systemin-responsive Phosphoproteome
Source: PubMed Central journal article supplement (PMC6683004; doi:10.1074/mcp.ra119.001367), 2019-05-28
Supplement: 143488_2_supp_337928_ps5hgj.pdf [file 143488_2_supp_337928_ps5hgj.pdf]

**Supplementary Figure 2:** Representative annotated spectra of identified phosphopeptides under systemin,A17 and water treatment as exported from MaxQuant.

Raw file Scan Method Score m/z  
 sys\_15\_1 13874 FTMS; HCD 139.7 579.76

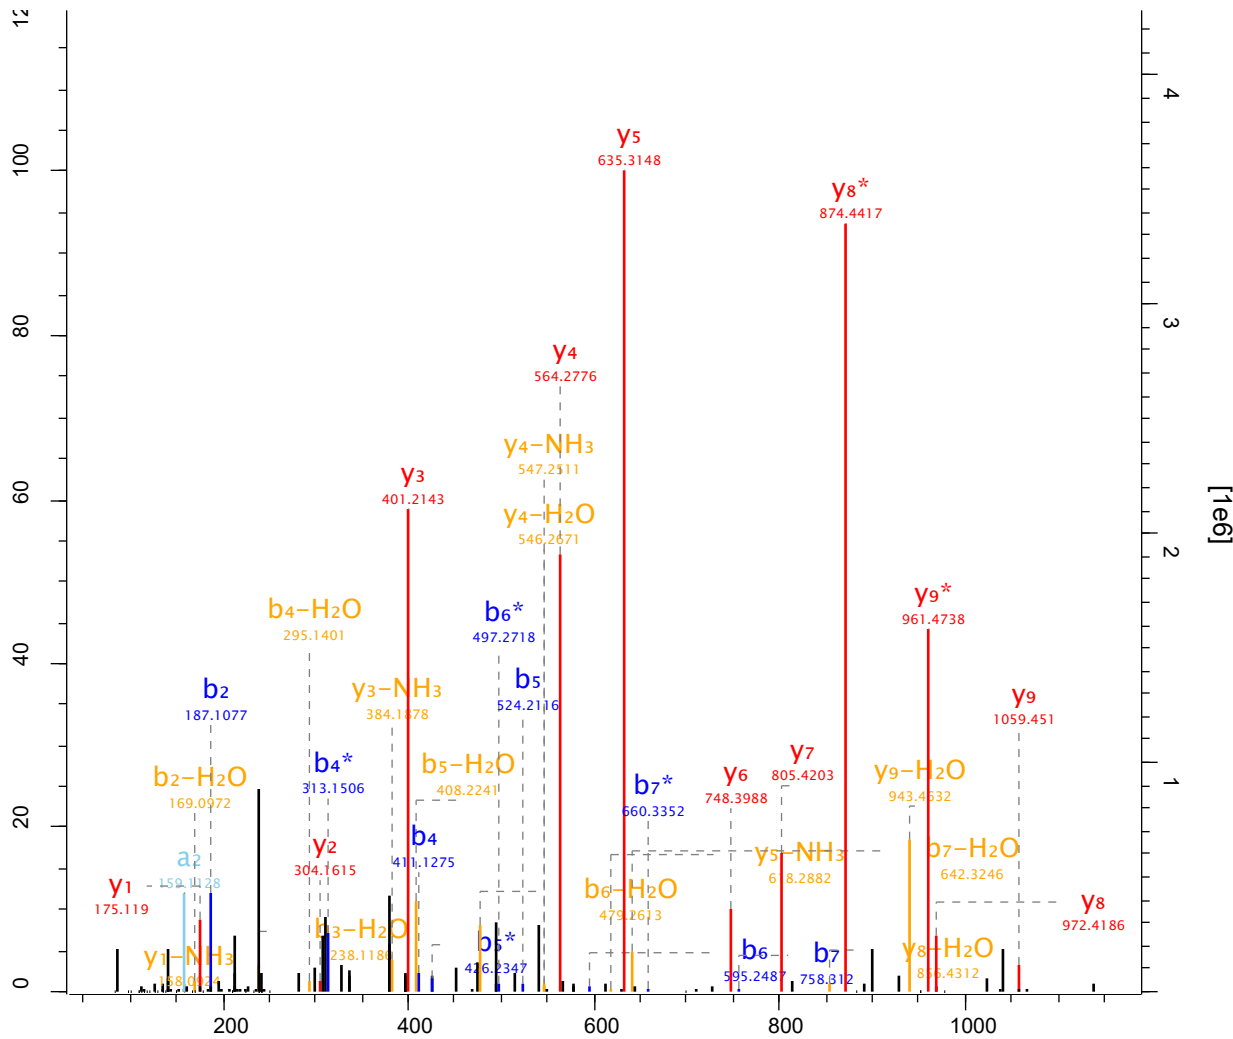

V - S S G L A Y P E R -

y9
y8
y7
y6
y5
y4
y3
y2
y1  
 S ph S G L A Y P E R  
b2
b4
b5
b6
b7



Raw file Scan Method Score m/z  
 sys\_15\_1 13948 FTMS; HCD 50.18 803.33

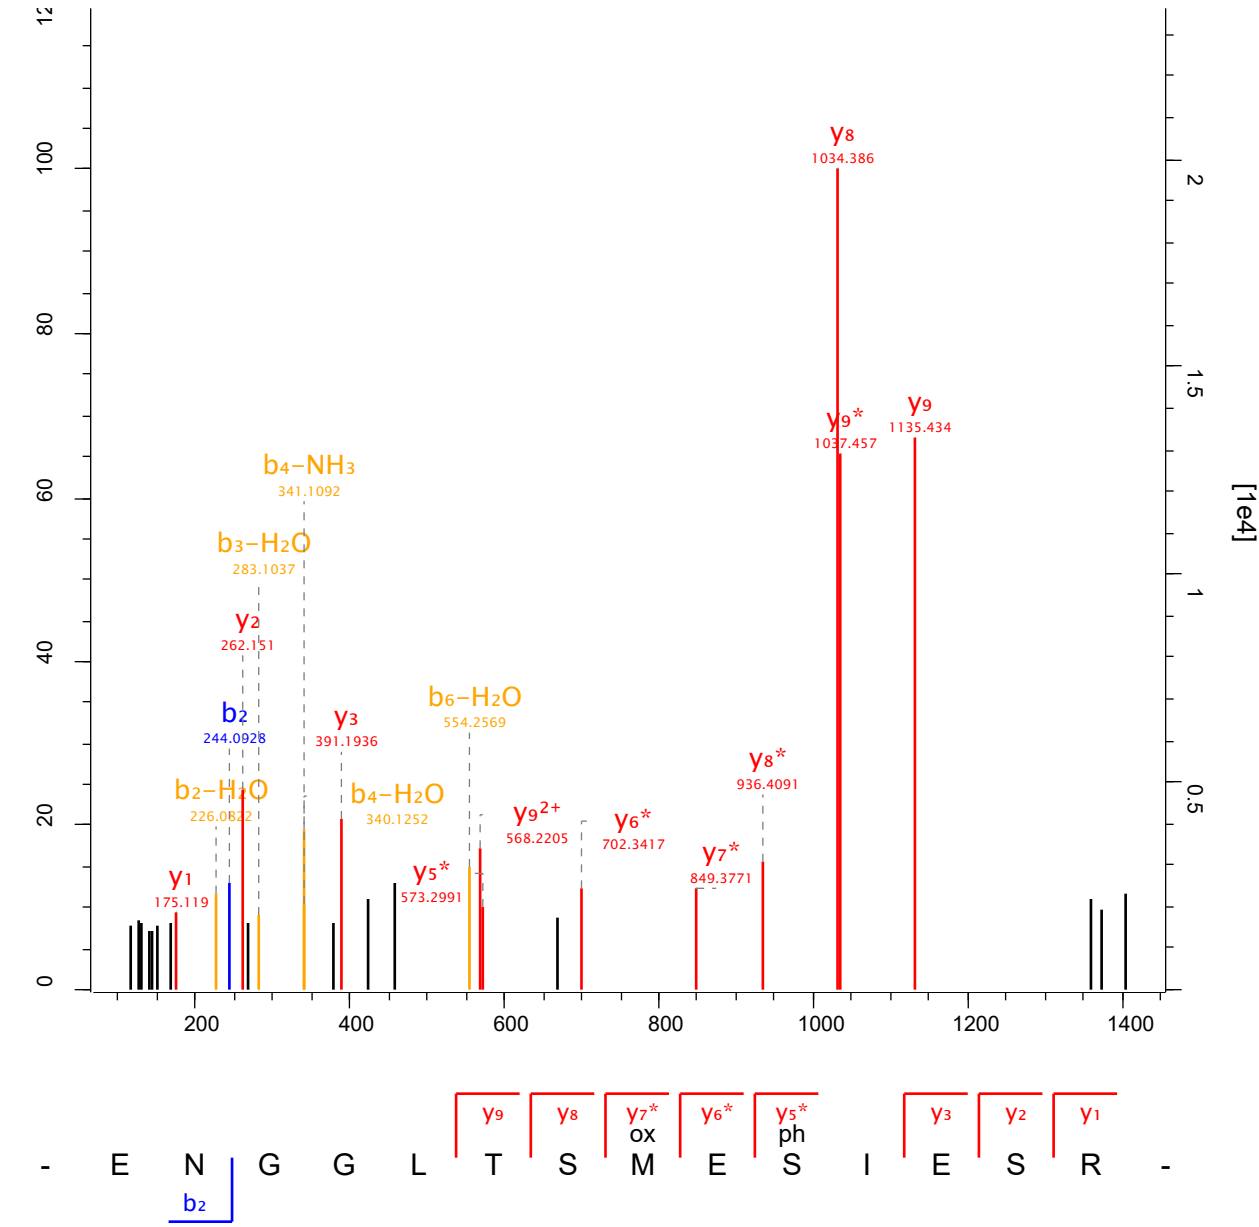



| Raw file | Scan  | Method    | Score | m/z    |
|----------|-------|-----------|-------|--------|
| sys_15_1 | 14016 | FTMS; HCD | 45.37 | 559.69 |

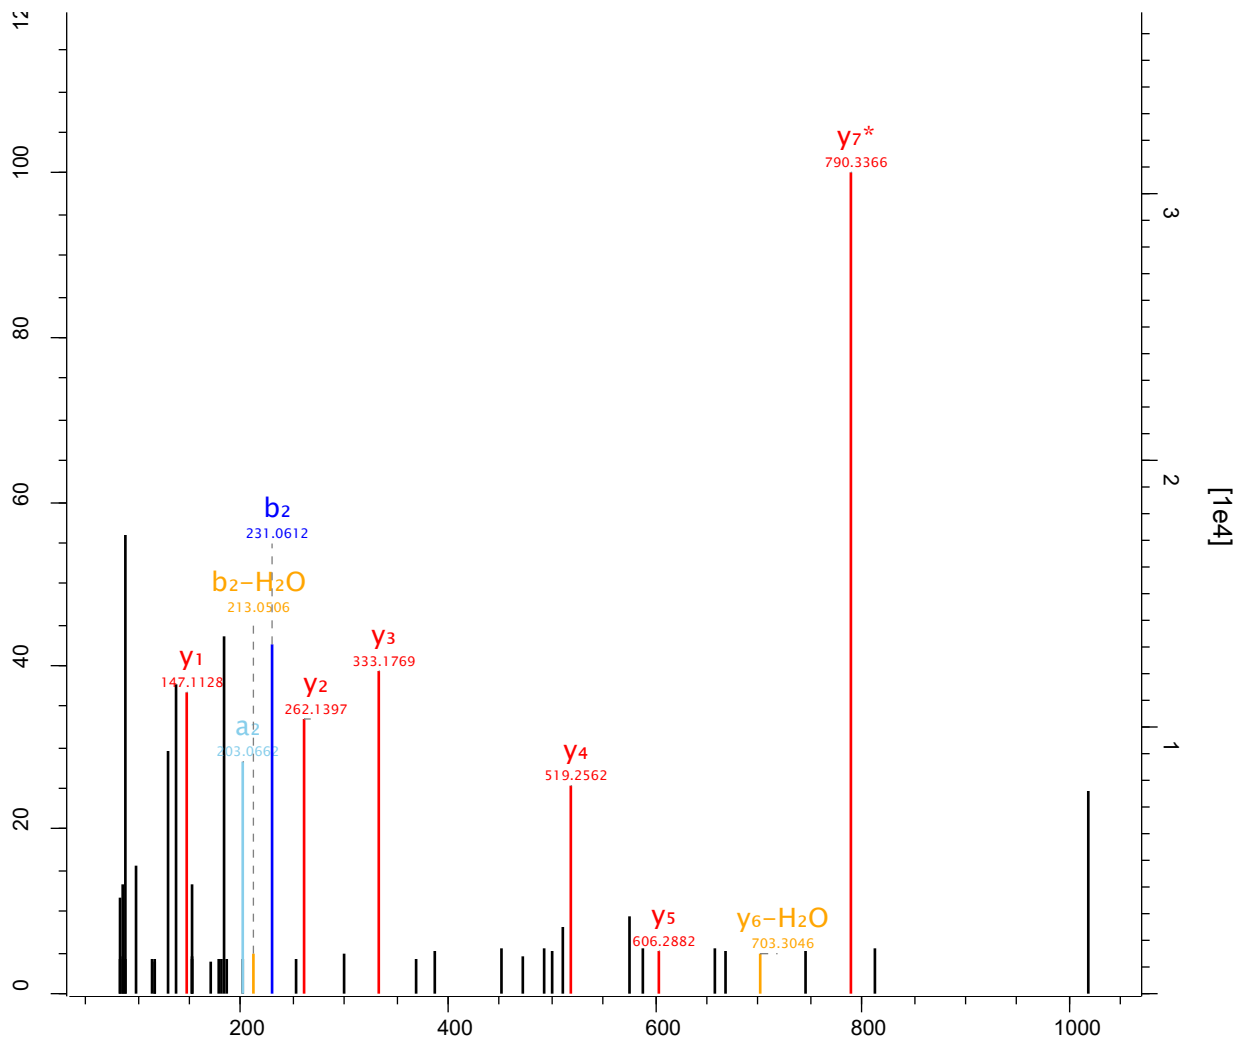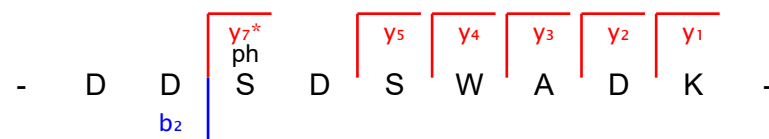

Raw file Scan Method Score m/z  
 sys\_15\_1 14039 FTMS; HCD 95.57 610.79

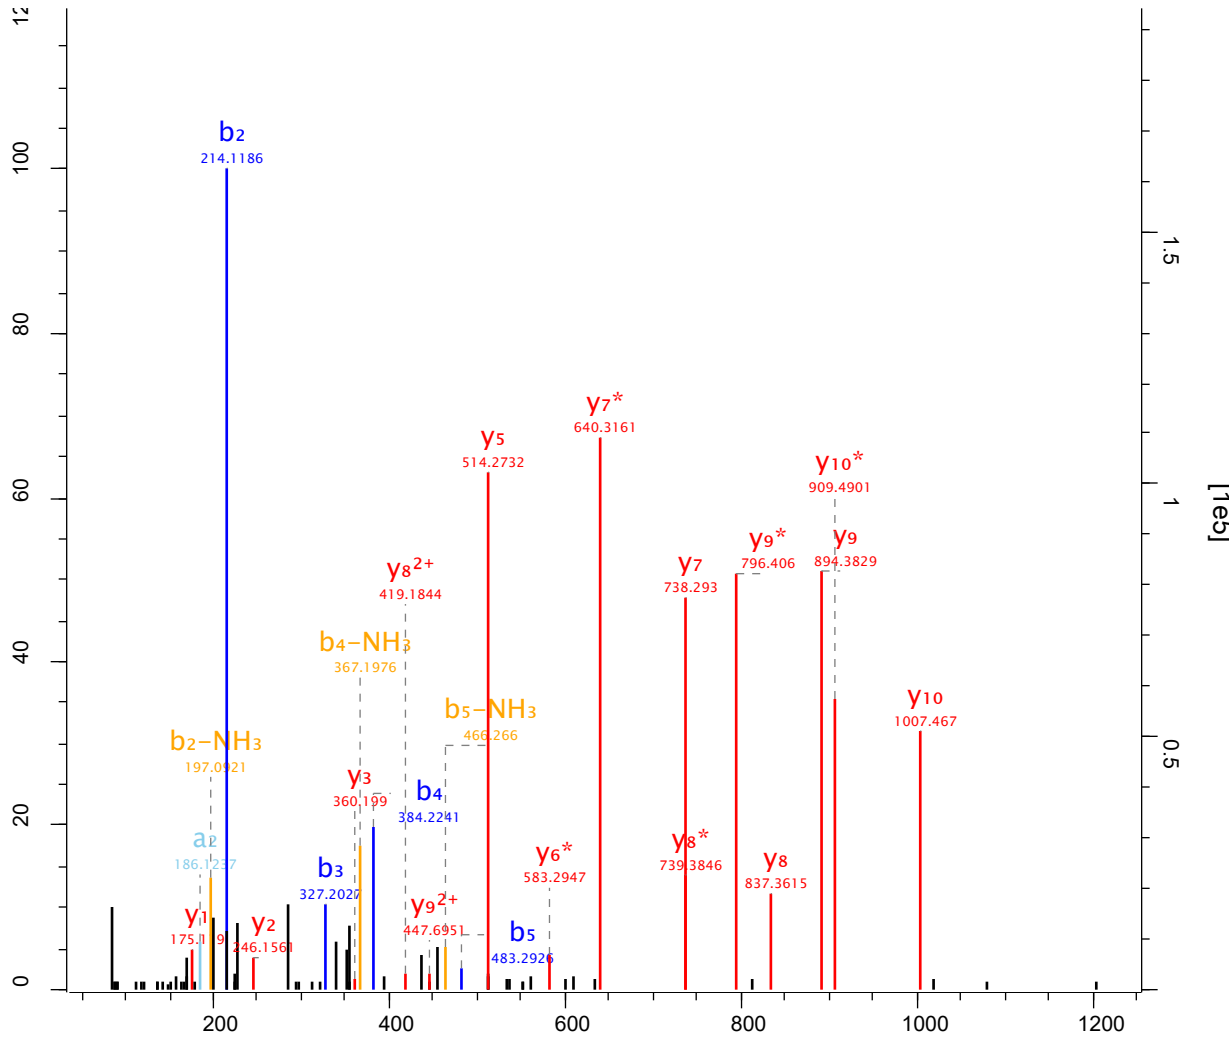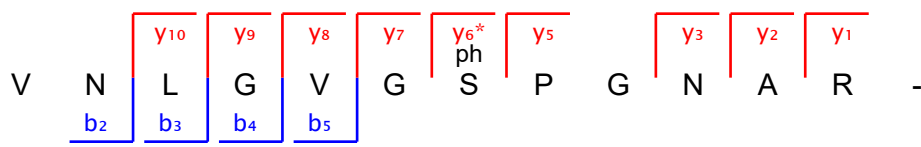

Raw file Scan Method Score m/z  
 sys\_15\_1 14217 FTMS; HCD 136.14 547.27

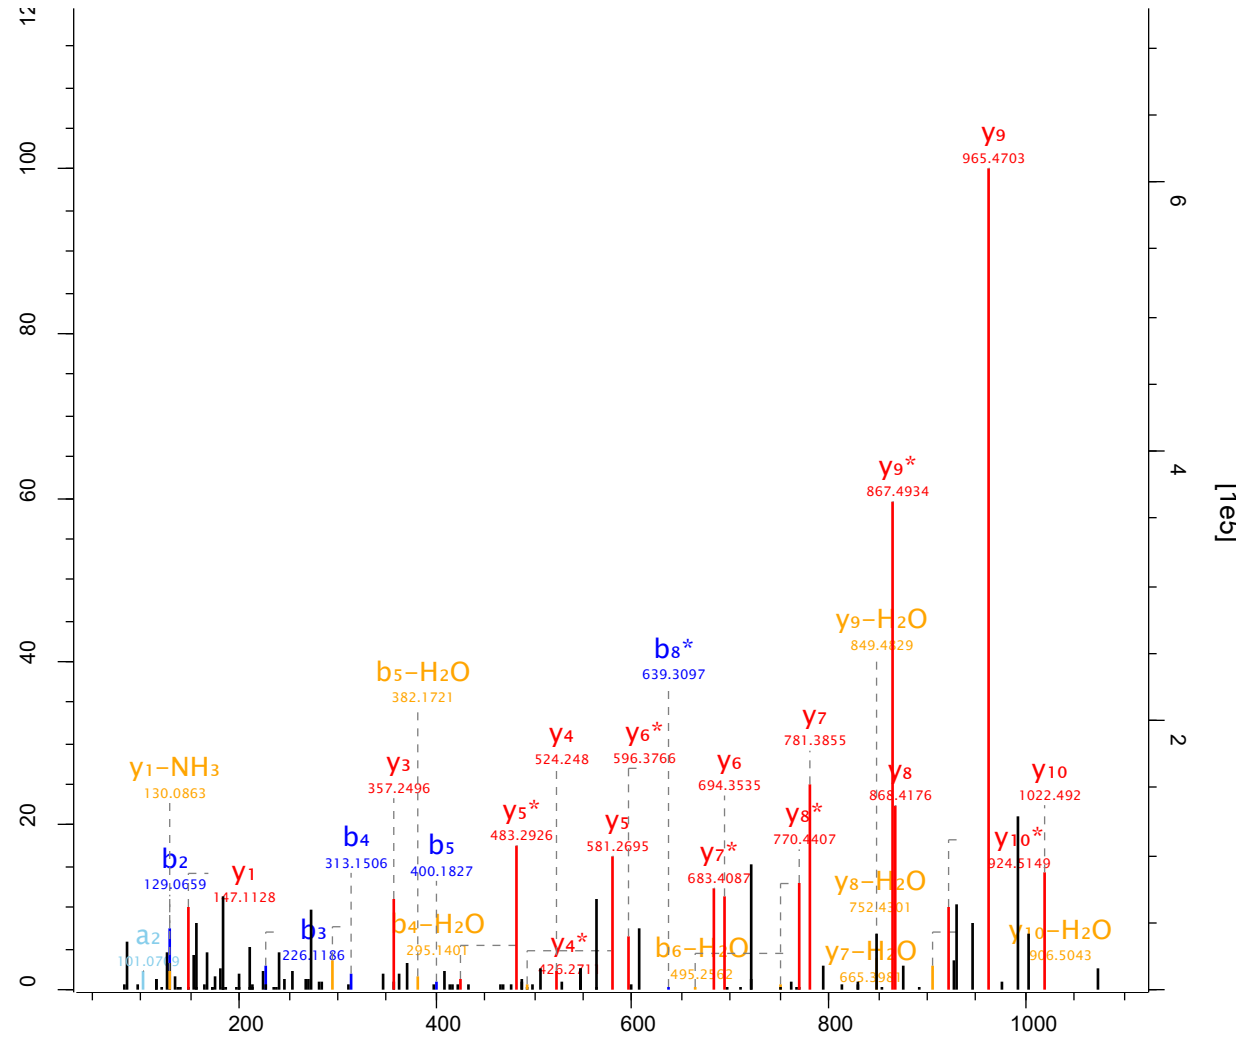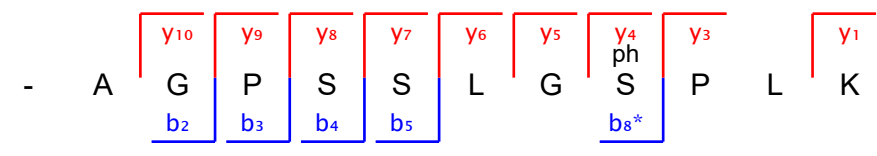

Raw file Scan Method Score m/z  
 sys\_15\_1 14263 FTMS; HCD 248.23 891.87

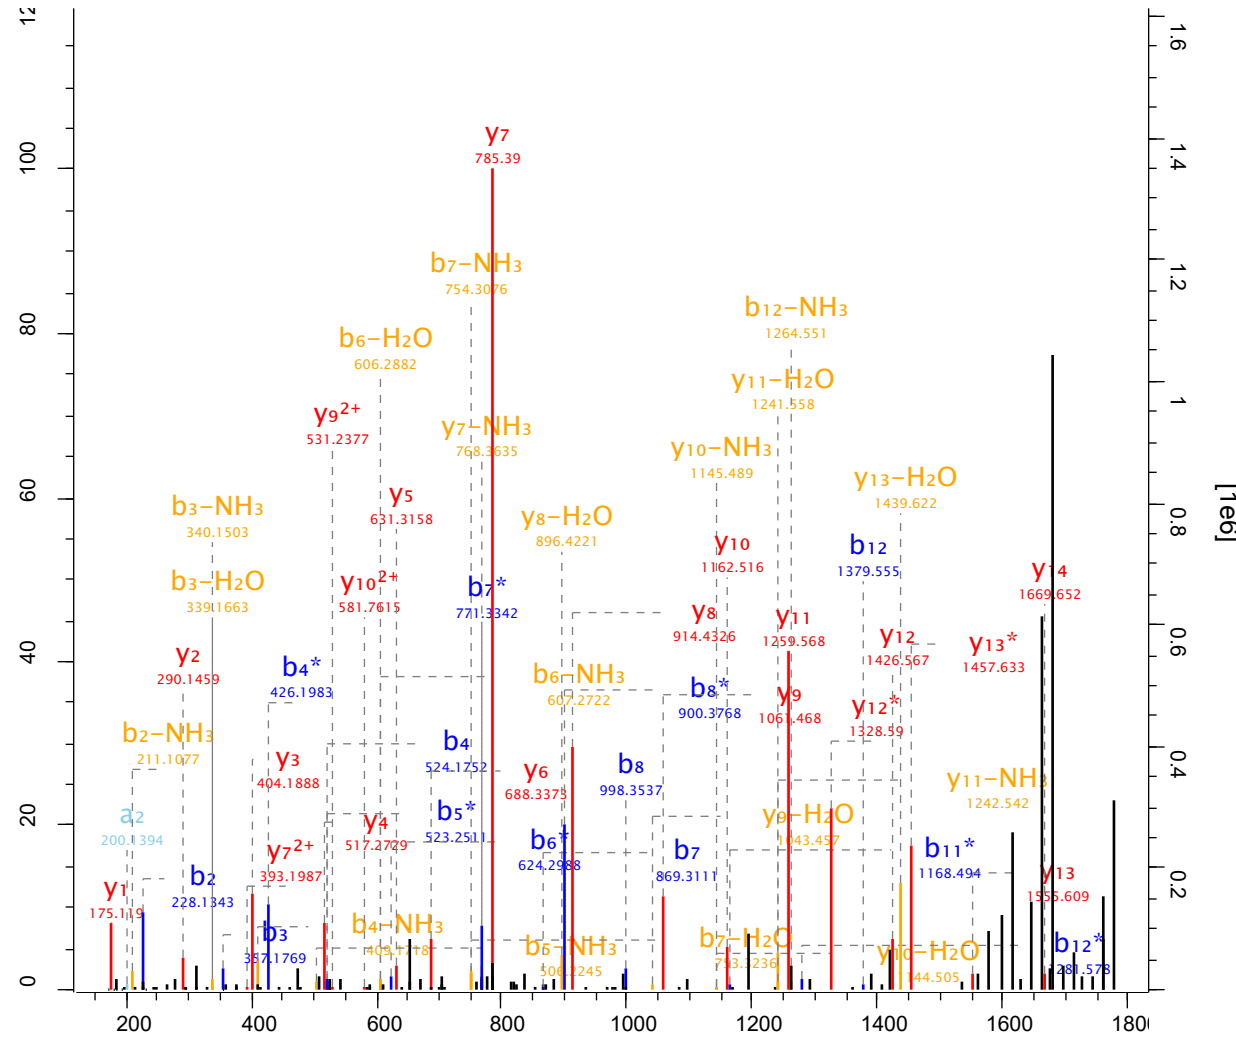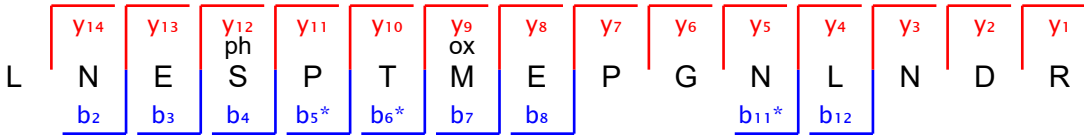

Raw file Scan Method Score m/z  
 sys\_15\_1 14334 FTMS; HCD 136.43 665.28

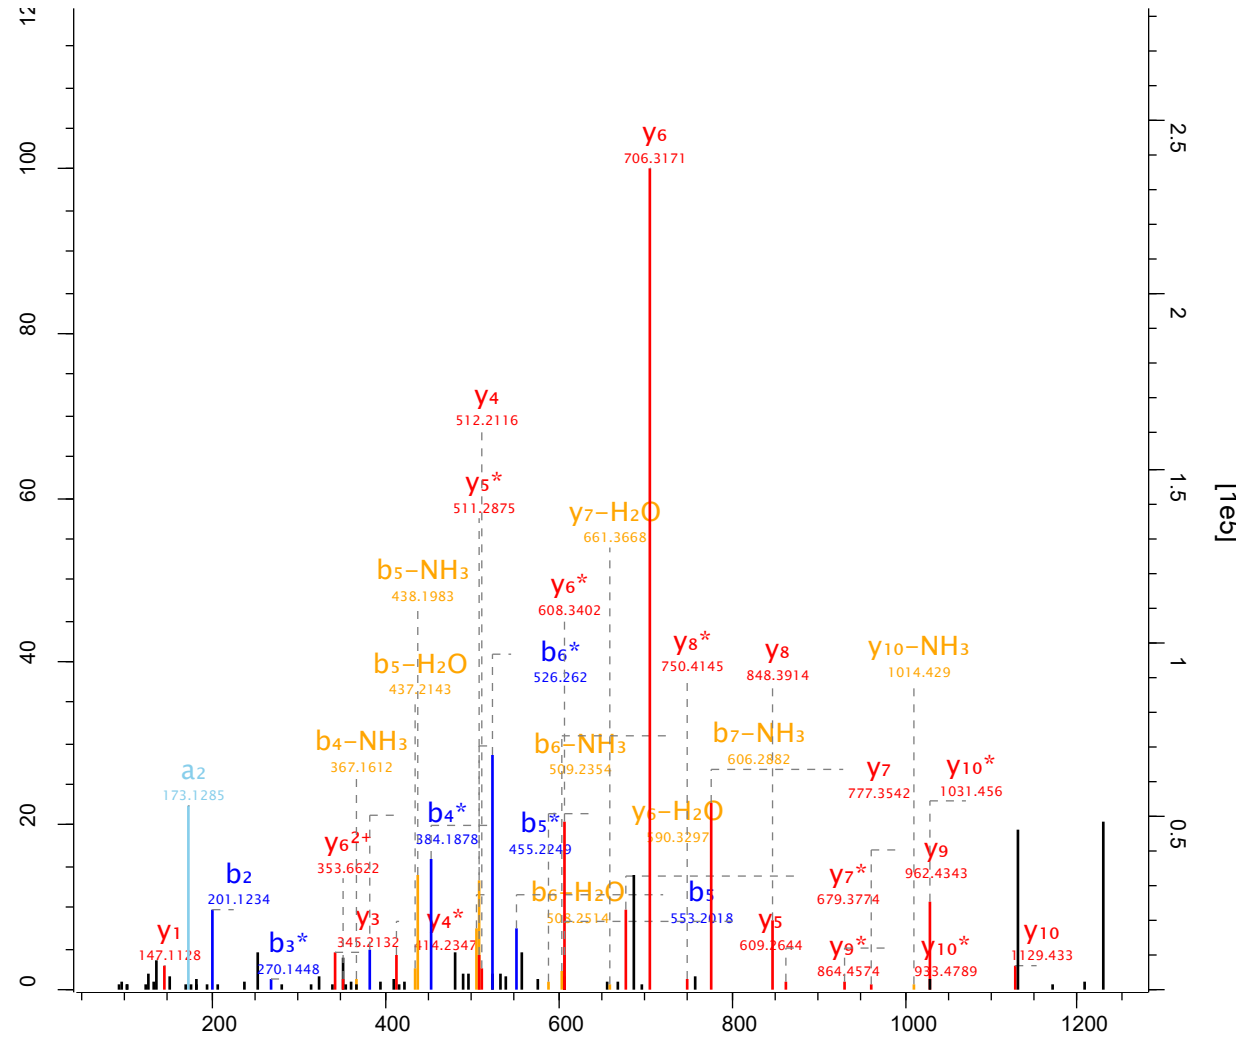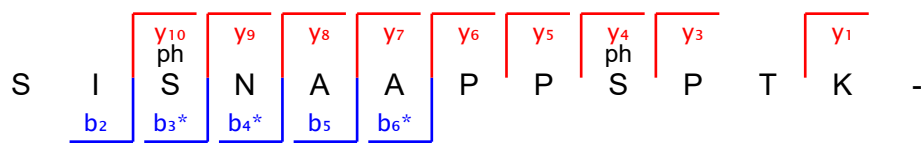

Raw file Scan Method Score m/z  
 sys\_15\_1 14339 FTMS; HCD 167.18 742.28

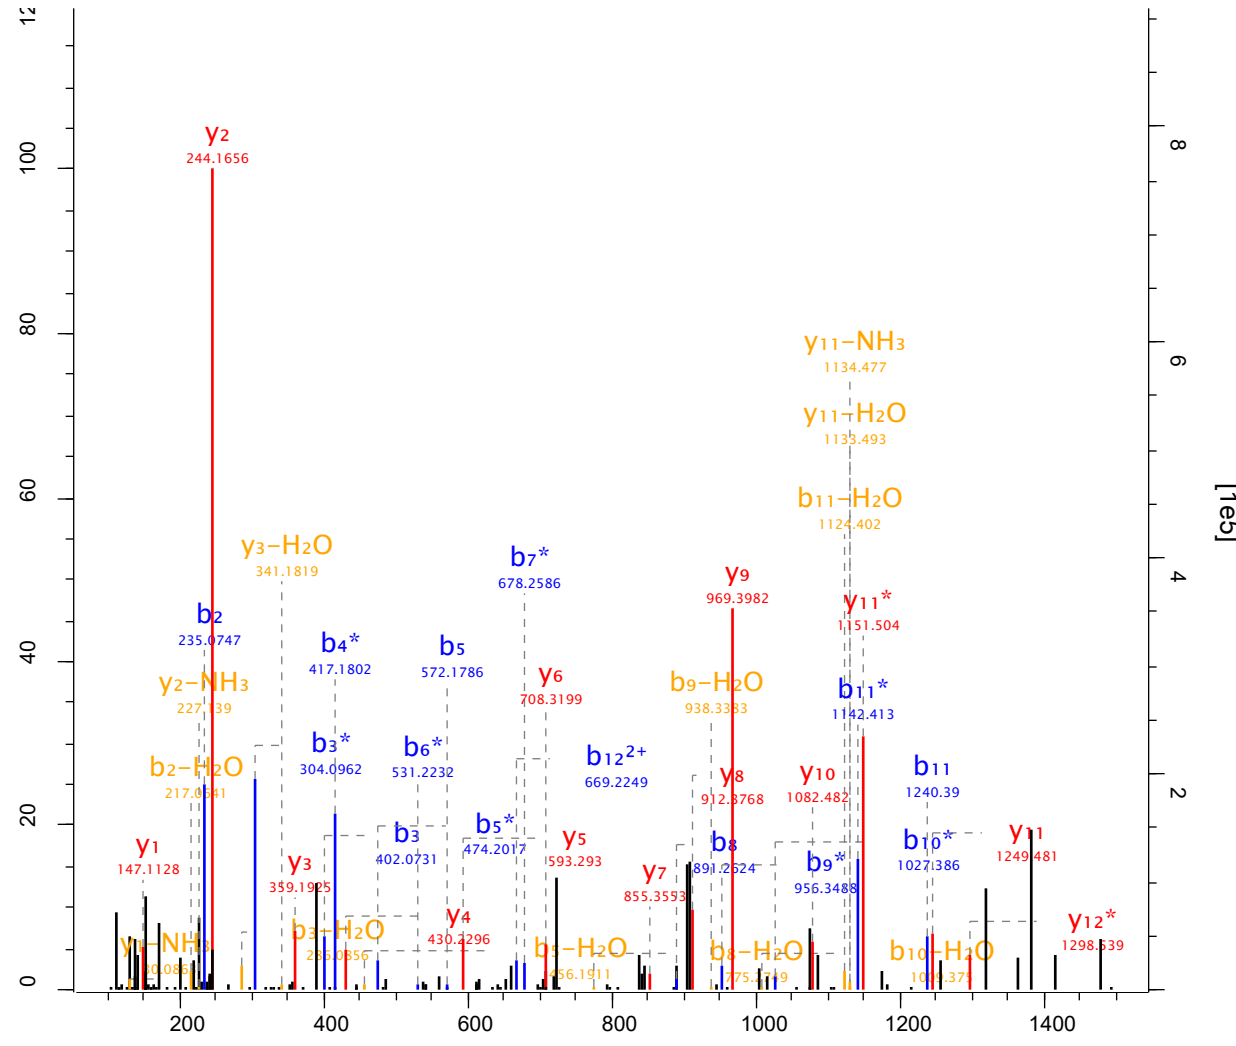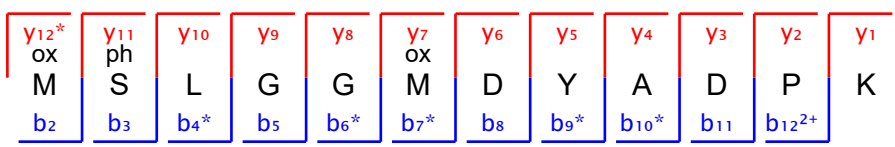

Raw file Scan Method Score m/z  
 sys\_15\_1 14353 FTMS; HCD 267.38 728.82

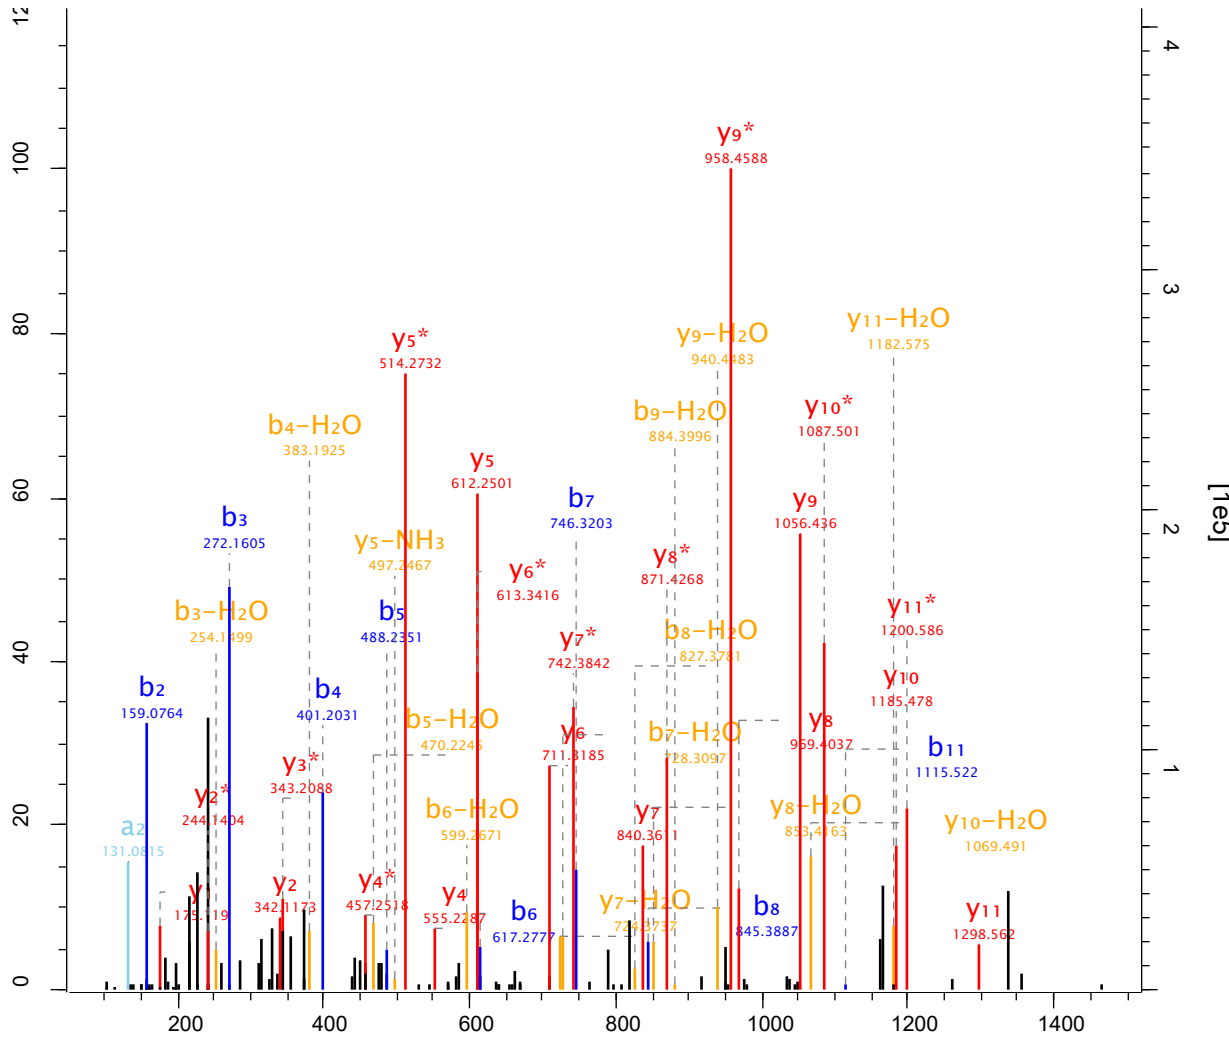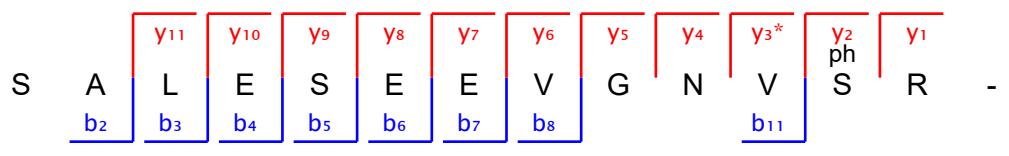

Raw file Scan Method Score m/z  
 sys\_15\_1 14357 FTMS; HCD 77.22 816.8

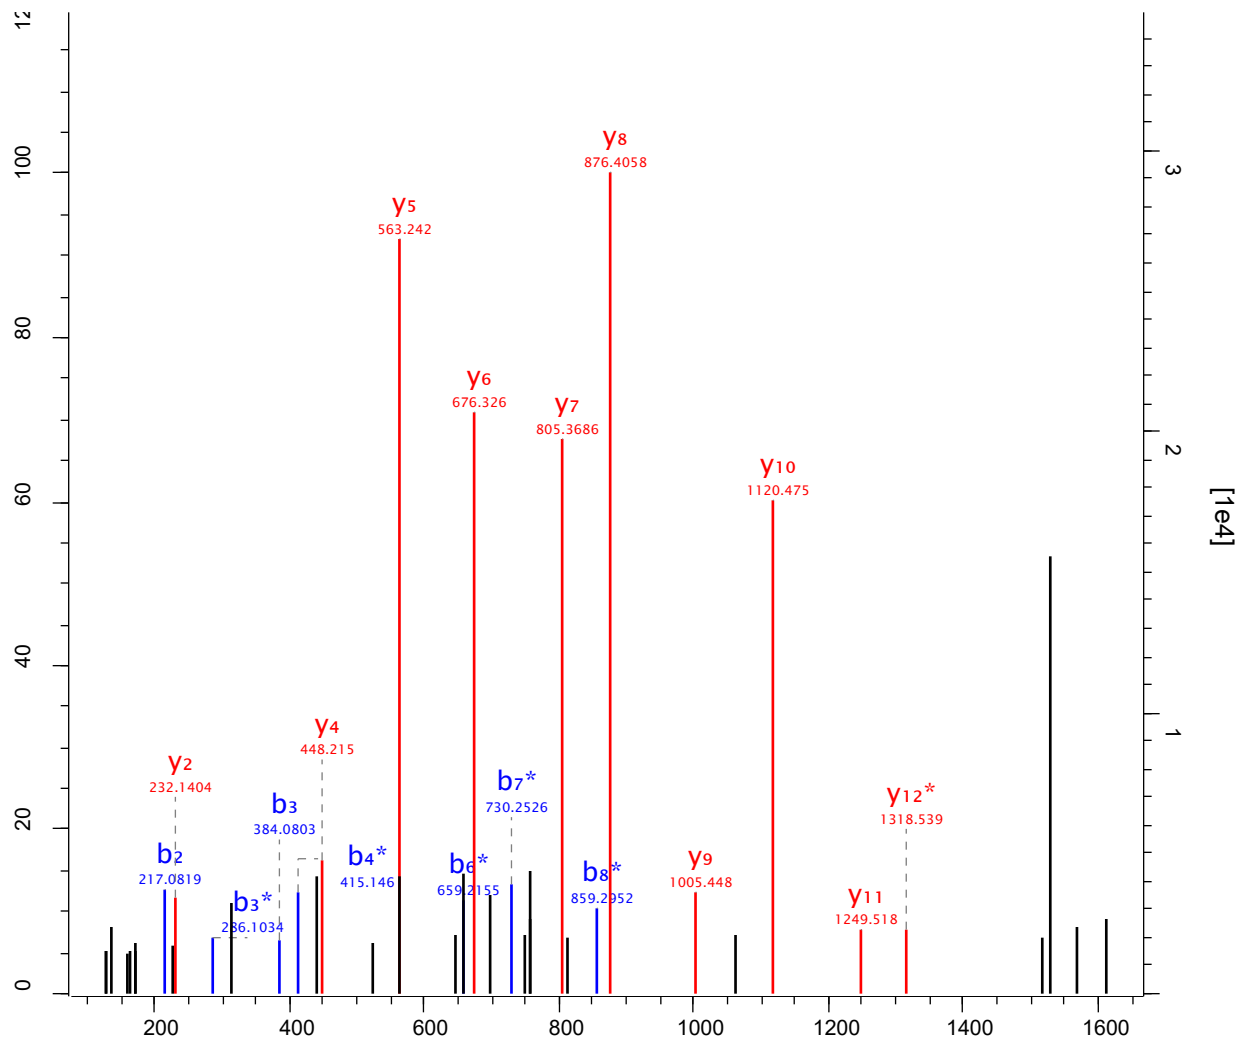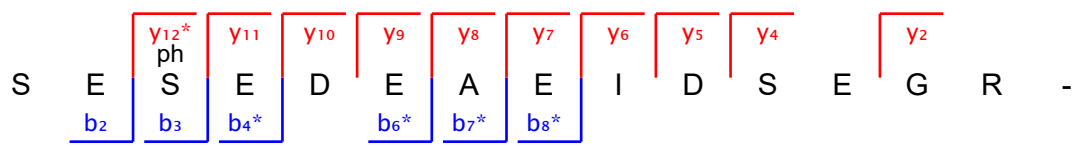



Raw file Scan Method Score m/z  
 sys\_15\_1 14392 FTMS; HCD 72.9 755.29

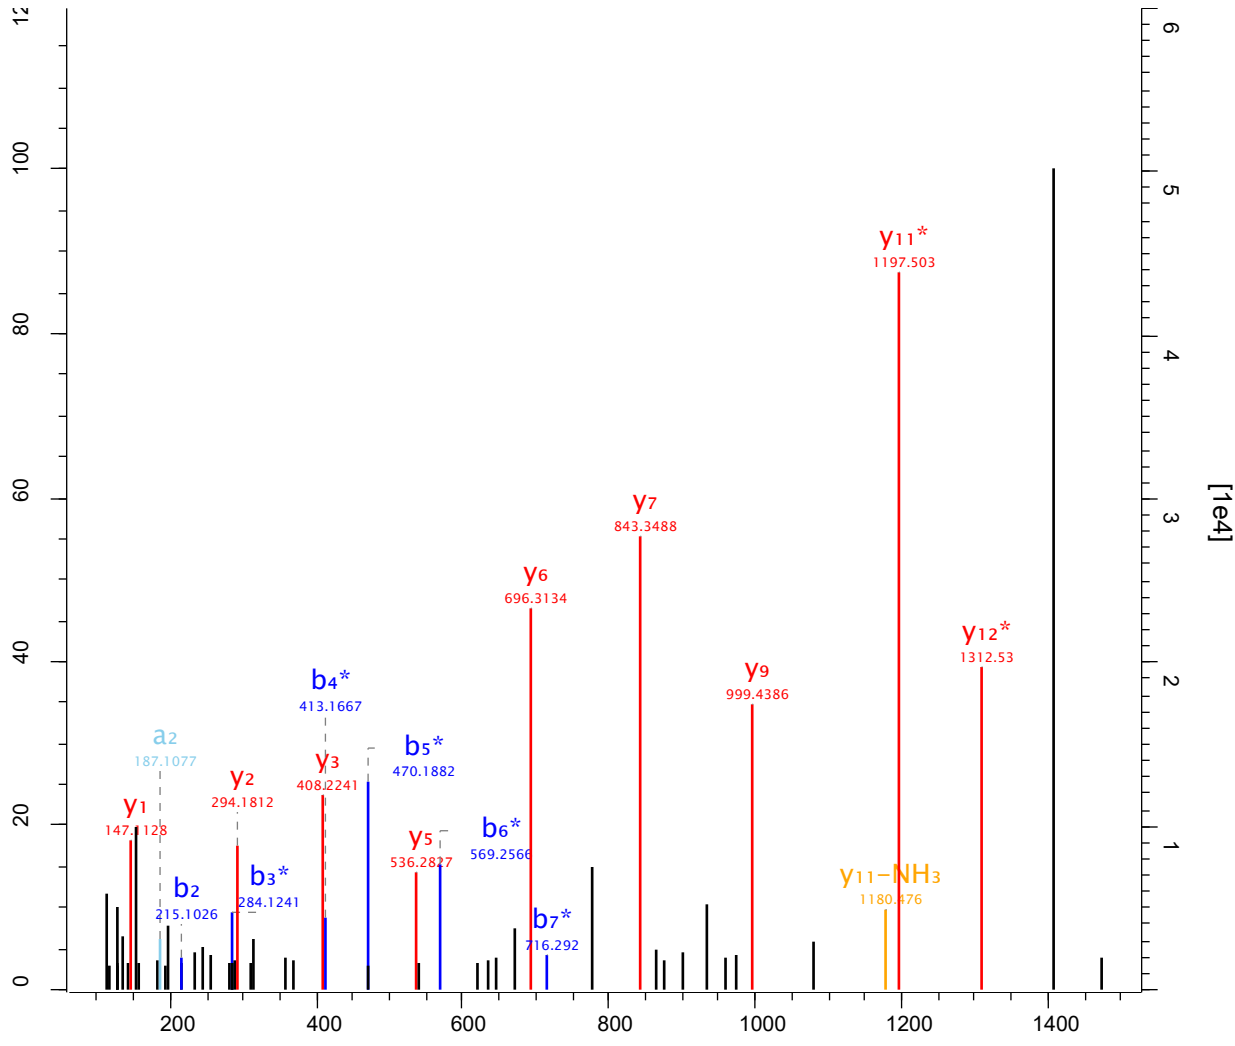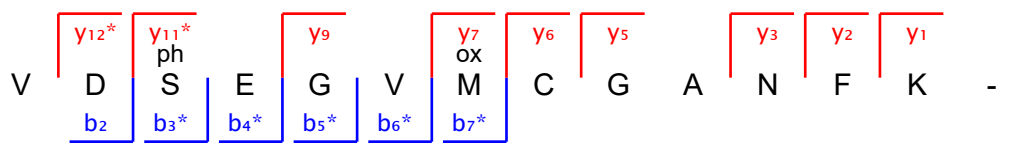



Raw file Scan Method Score m/z  
 sys\_15\_1 14462 FTMS; HCD 119.39 556.75

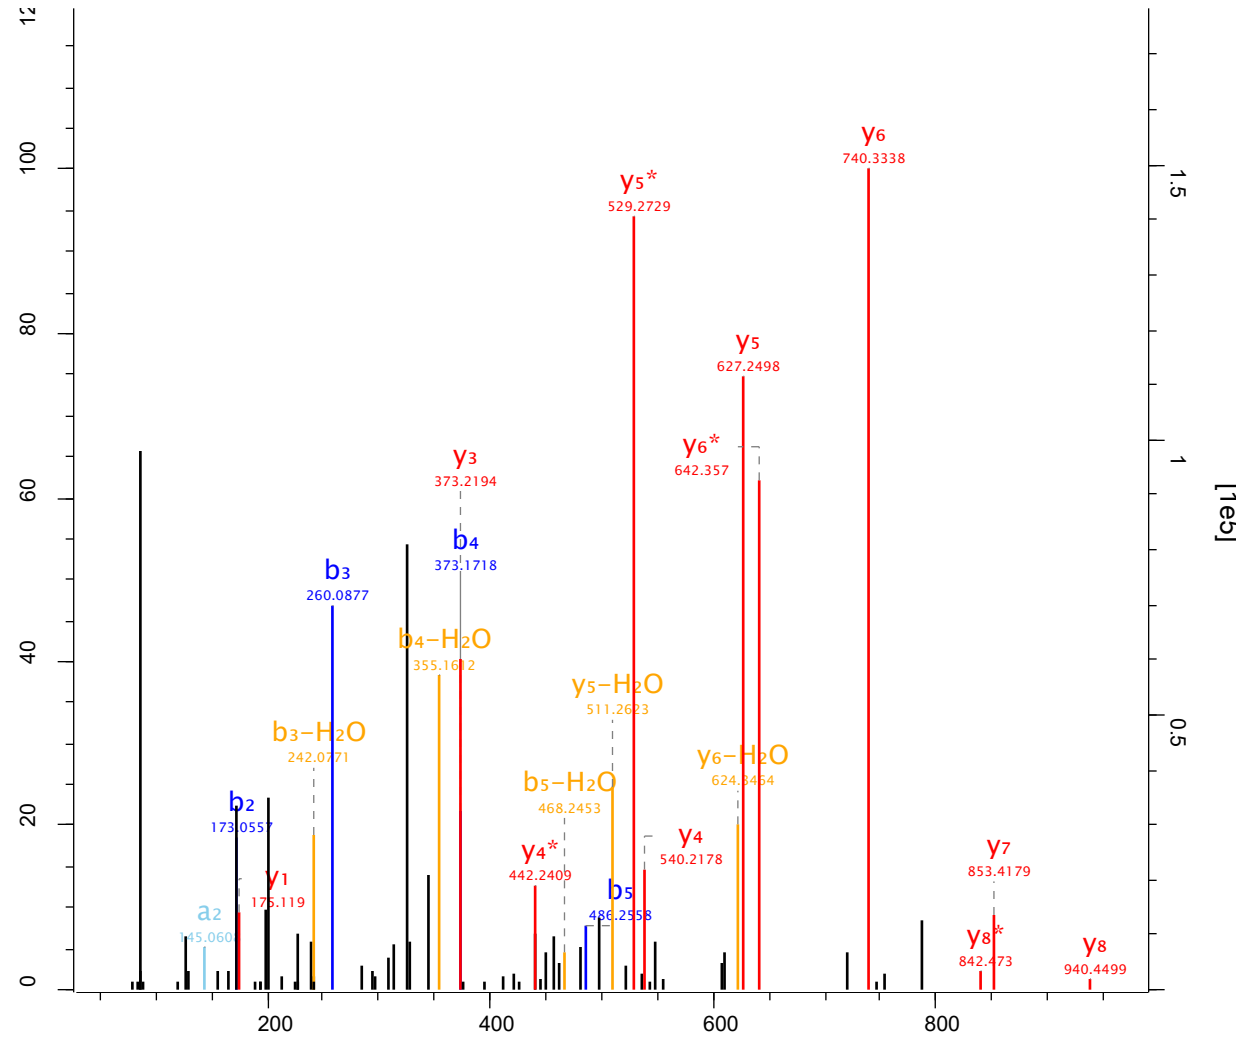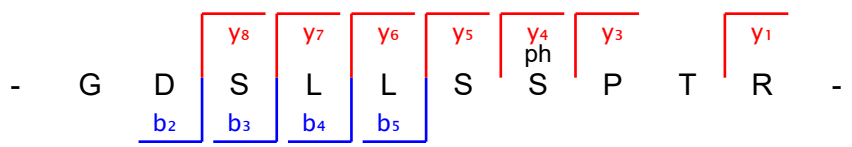

Raw file Scan Method Score m/z  
 sys\_15\_1 14488 FTMS; HCD 242.71 1012.43

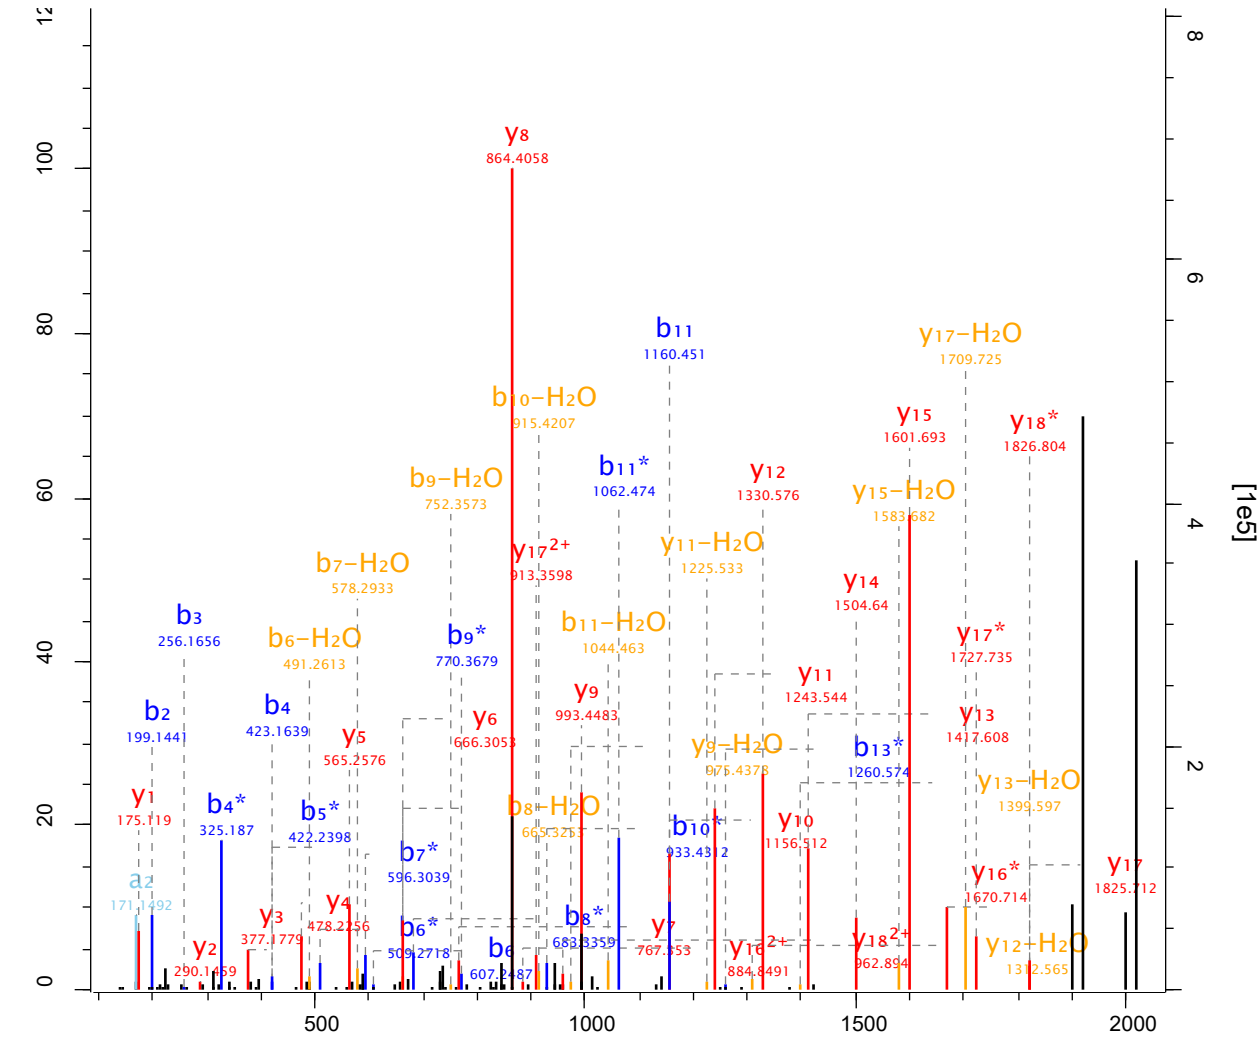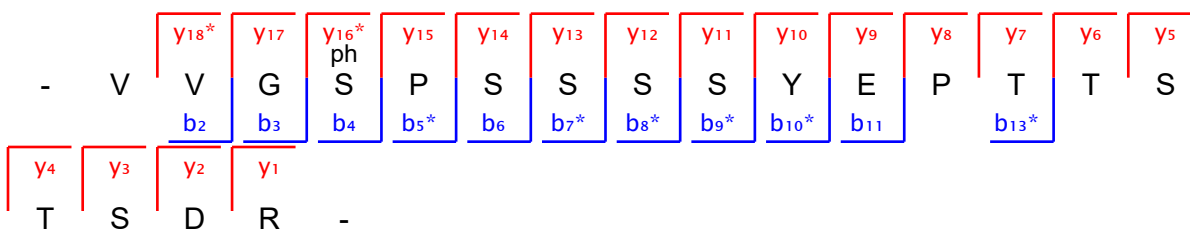

Raw file Scan Method Score m/z  
 sys\_15\_1 14562 FTMS; HCD 67.65 806.36

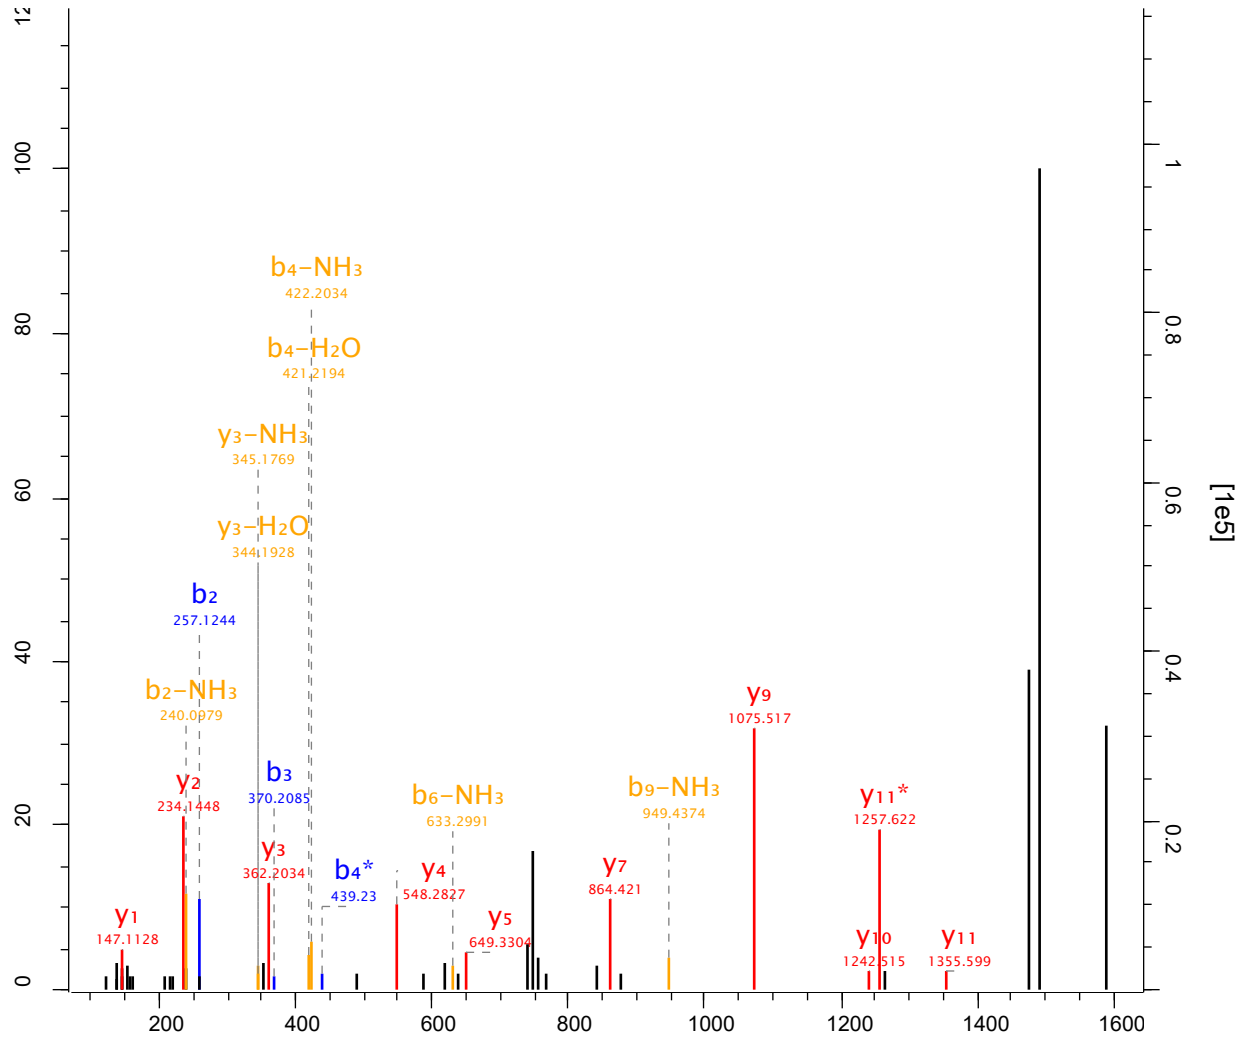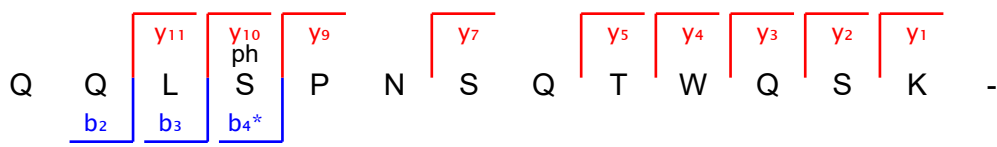

Raw file Scan Method Score m/z  
 sys\_15\_1 14567 FTMS; HCD 80.01 565.73

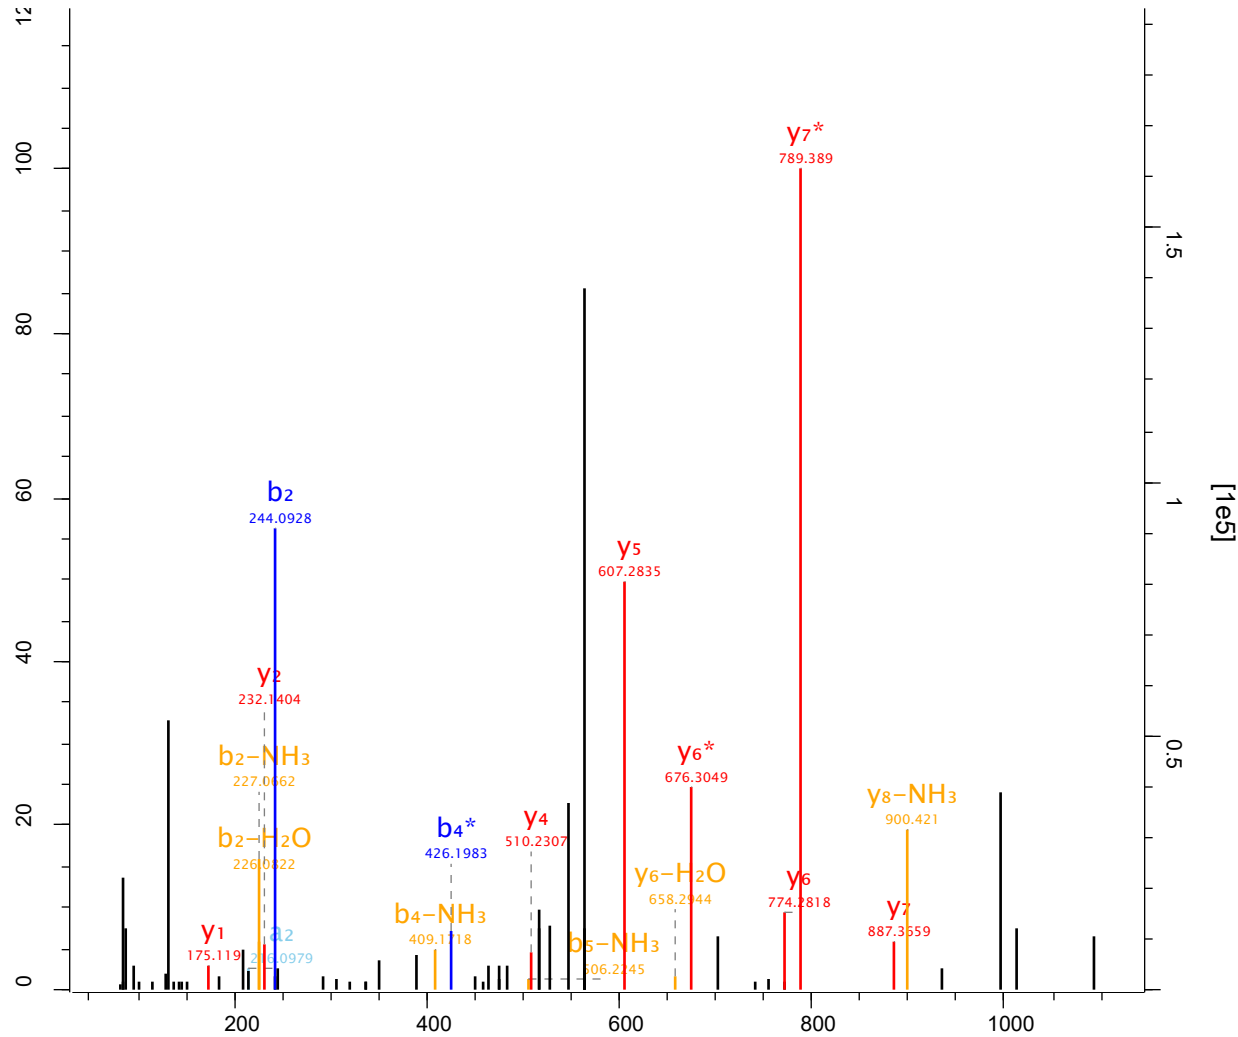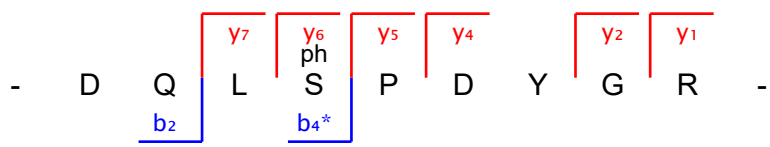

Raw file Scan Method Score m/z  
 sys\_15\_1 14675 FTMS; HCD 254.72 725.29

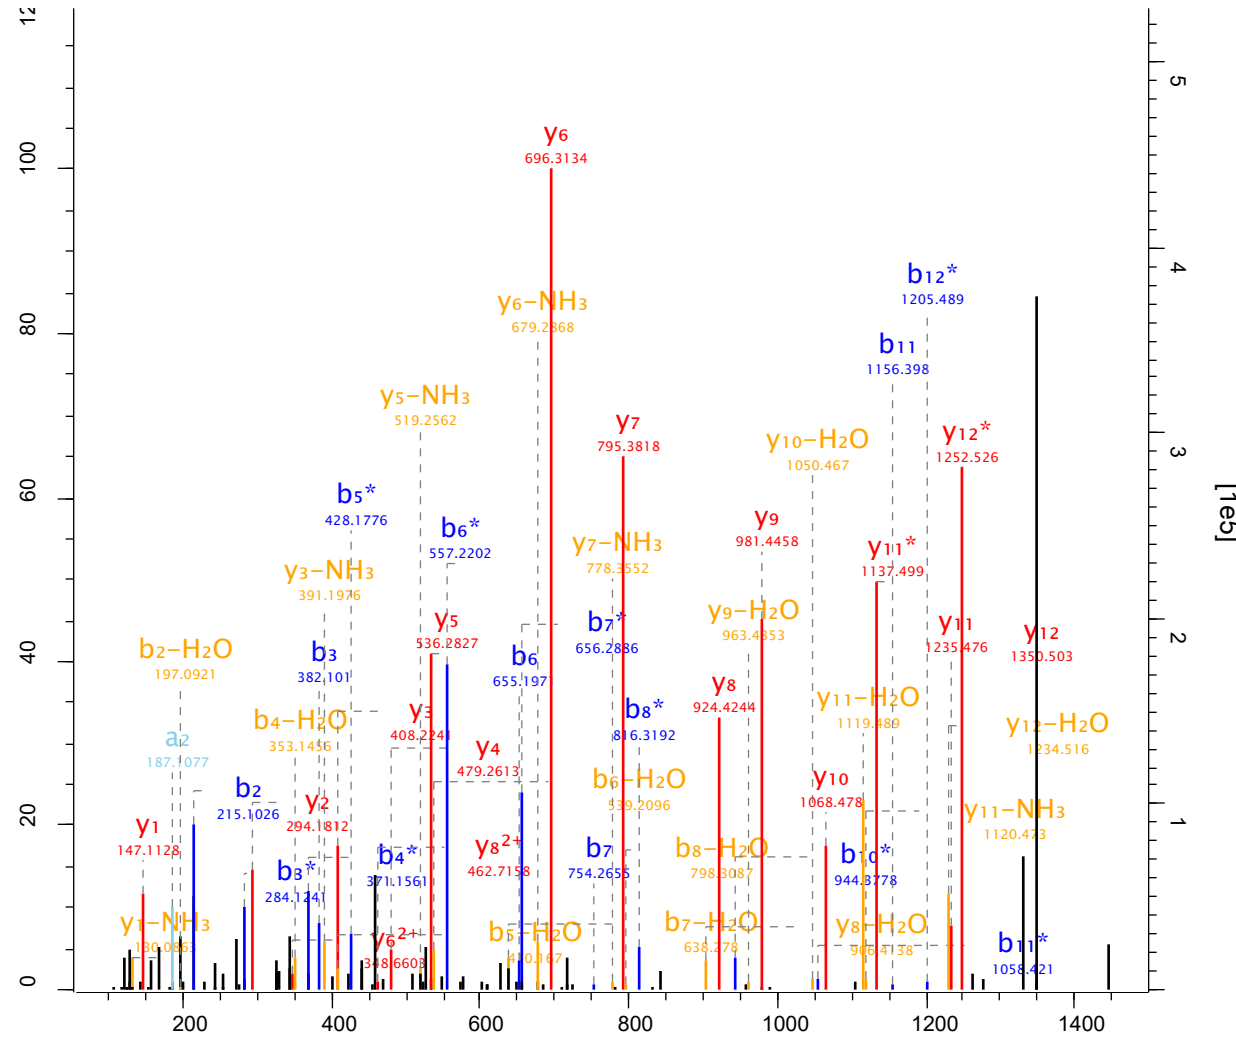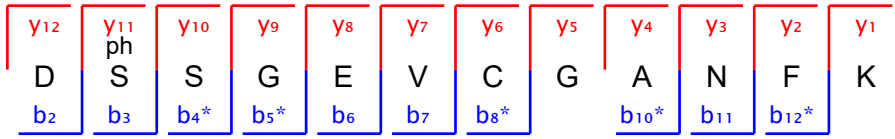

Raw file Scan Method Score m/z  
 sys\_15\_1 14695 FTMS; HCD 41.51 960.94

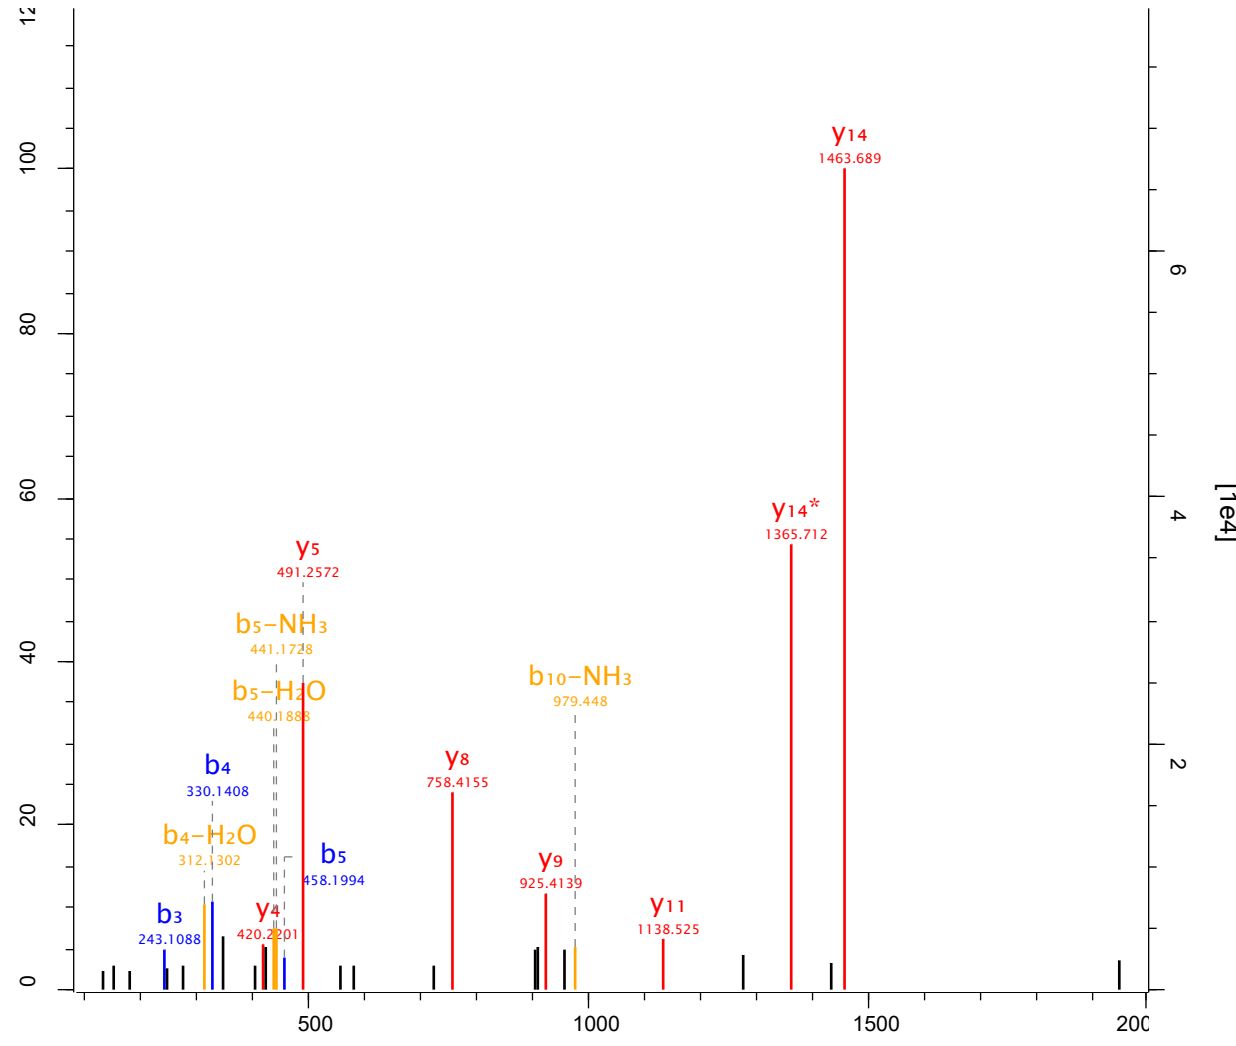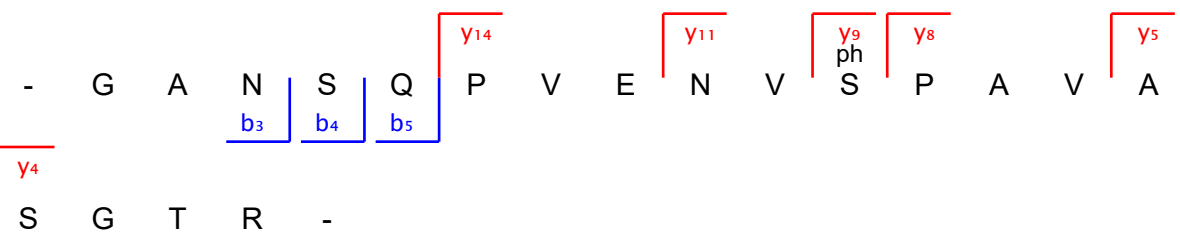



Raw file Scan Method Score m/z  
 sys\_15\_1 14850 FTMS; HCD 94.09 679.27

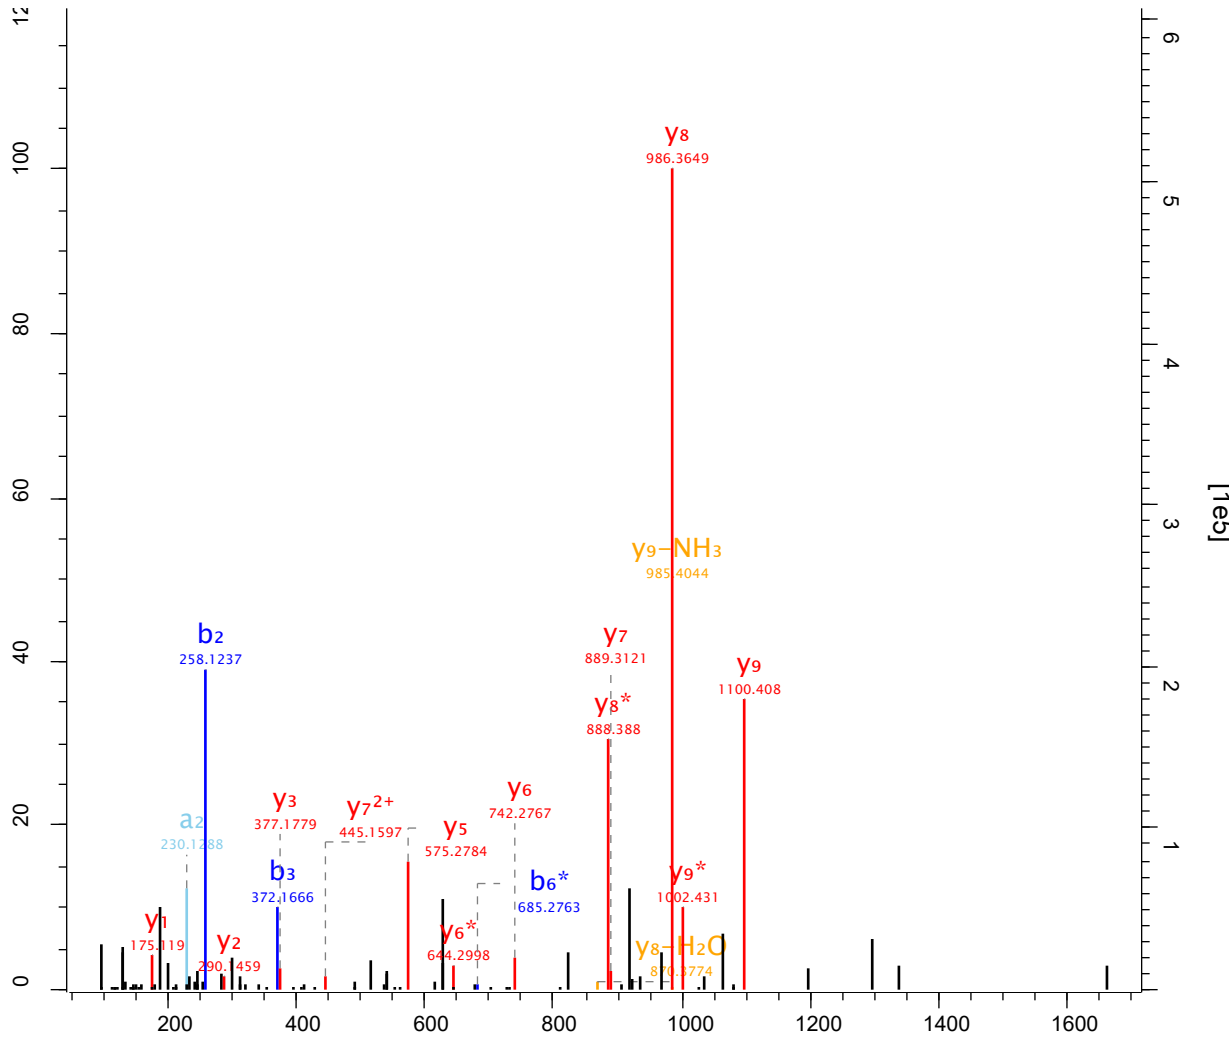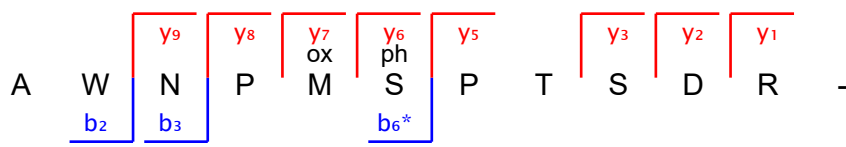

Raw file Scan Method Score m/z  
 sys\_15\_1 14894 FTMS; HCD 118.2 670.3

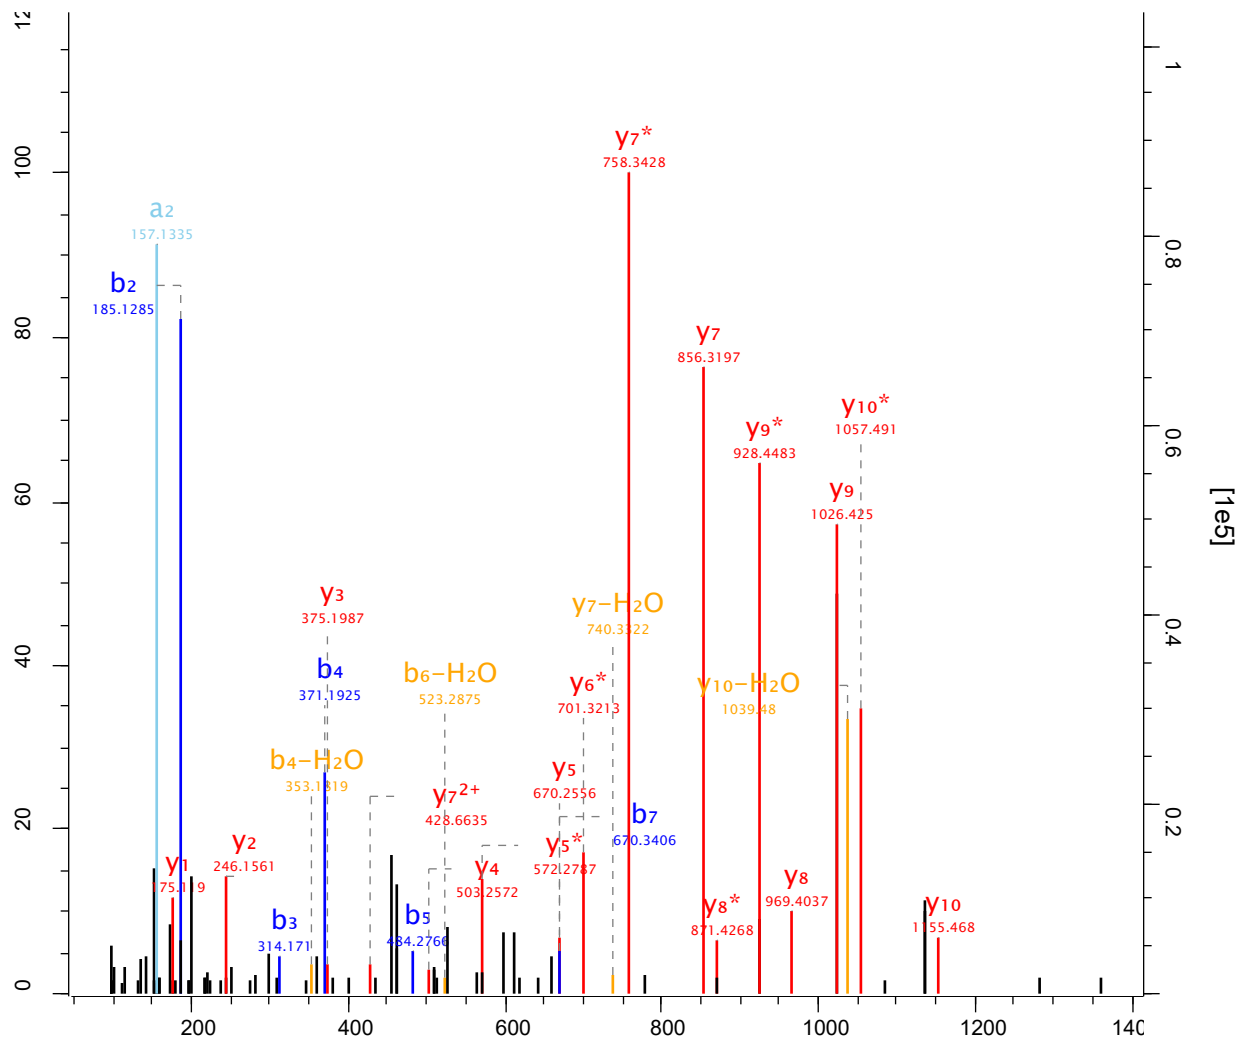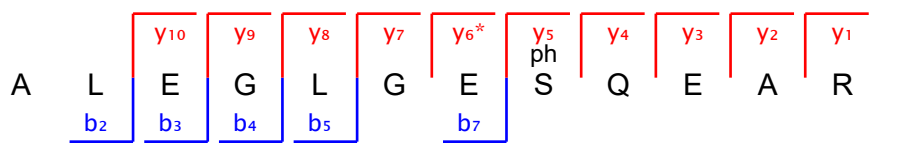

Raw file Scan Method Score m/z  
 sys\_15\_1 14948 FTMS; HCD 111.4 926.4

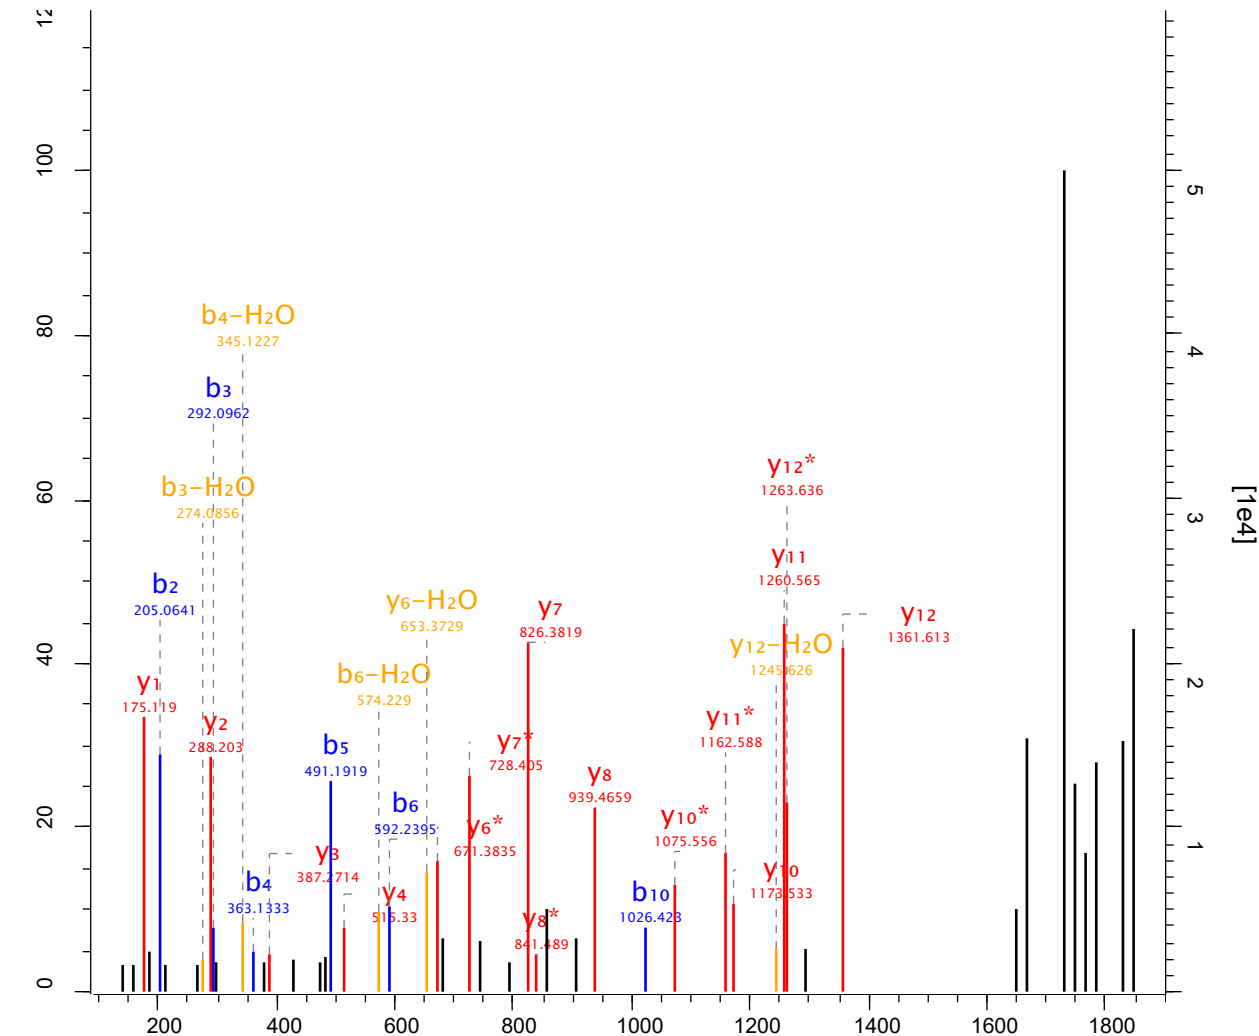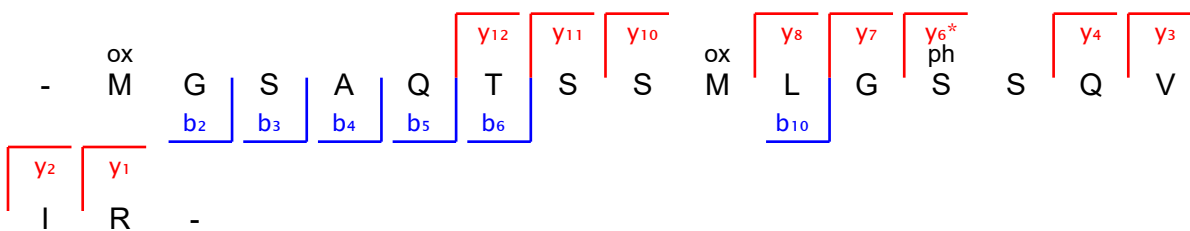

Raw file sys\_15\_1      Method FTMS; HCD      Score 162.59      m/z 751.33

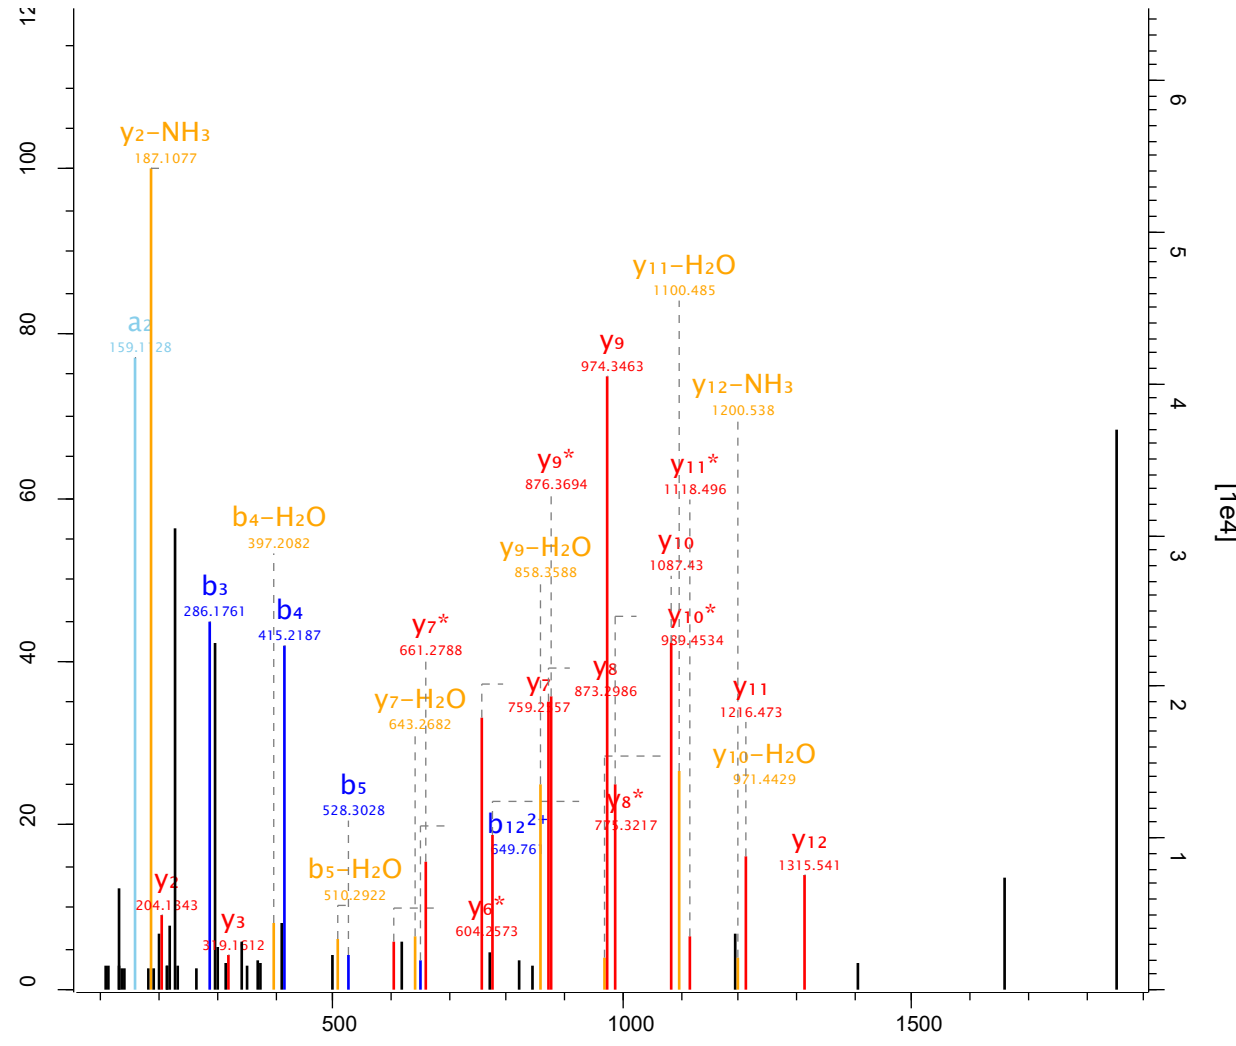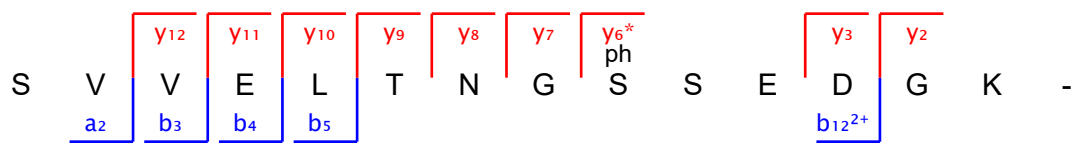

Raw file Scan Method Score m/z  
 sys\_15\_1 15005 FTMS; HCD 49.3 634.79

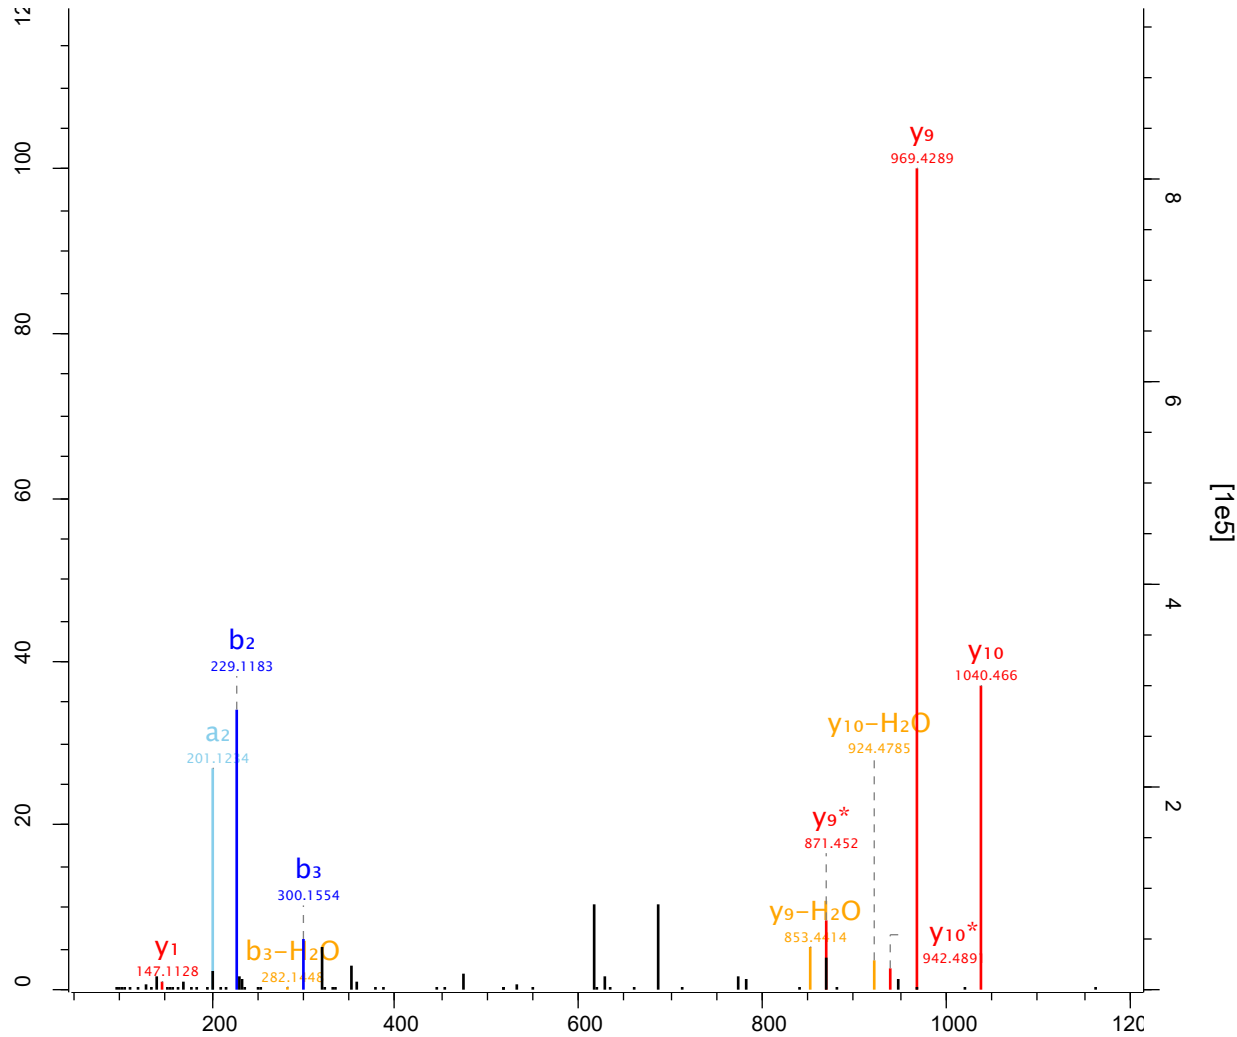

- V E A V ph T E G A E G V K -

Annotations: b2 (under E), b3 (under A), y10 (over A), y9 (over V), y1 (over K)

Raw file Scan Method Score m/z  
 sys\_15\_1 15127 FTMS; HCD 63.69 877.35

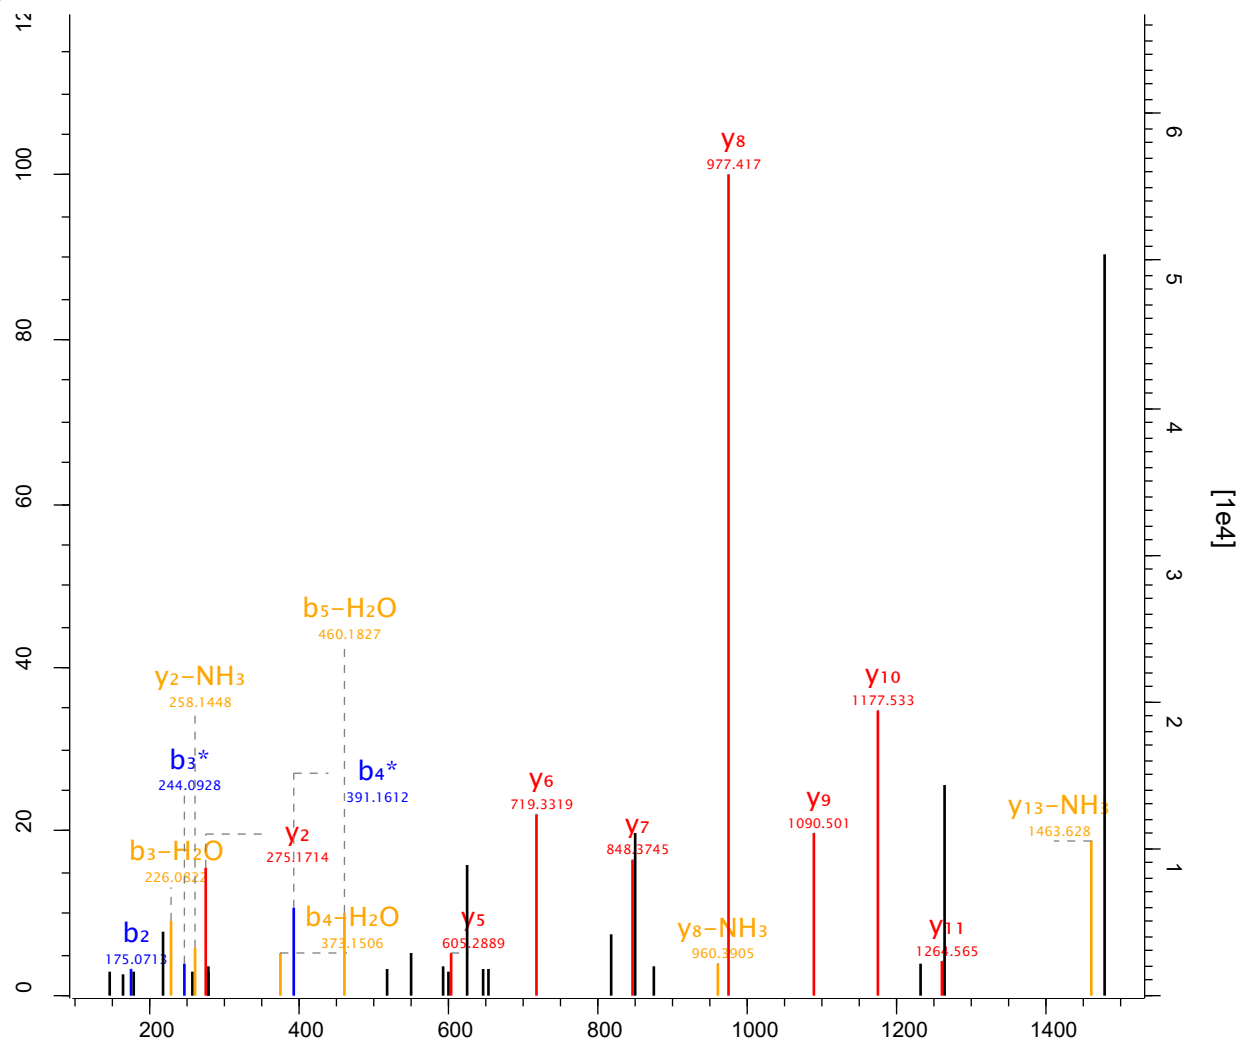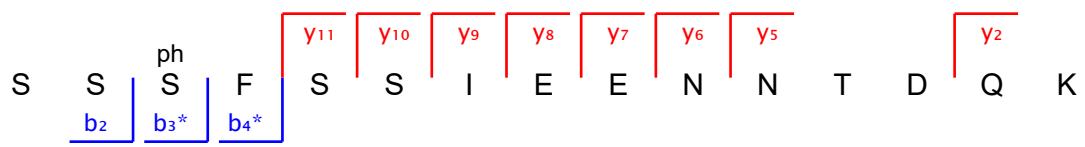

Raw file Scan Method Score m/z  
 sys\_15\_1 15152 FTMS; HCD 96.25 701.28

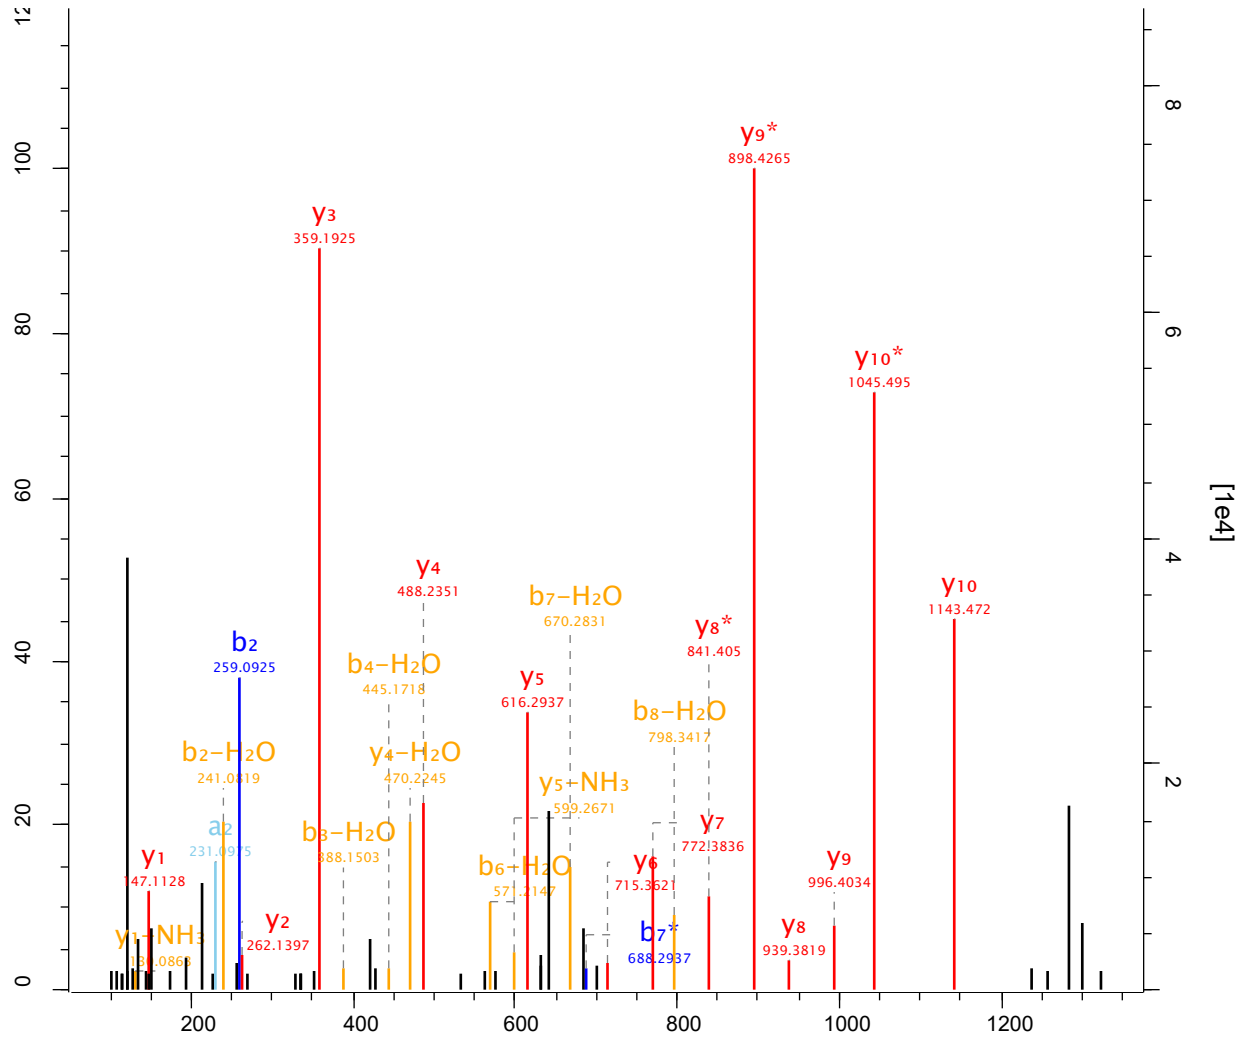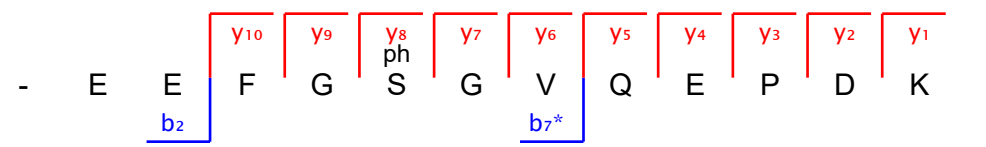

Raw file Scan Method Score m/z  
 sys\_15\_1 15390 FTMS; HCD 288.25 840.79

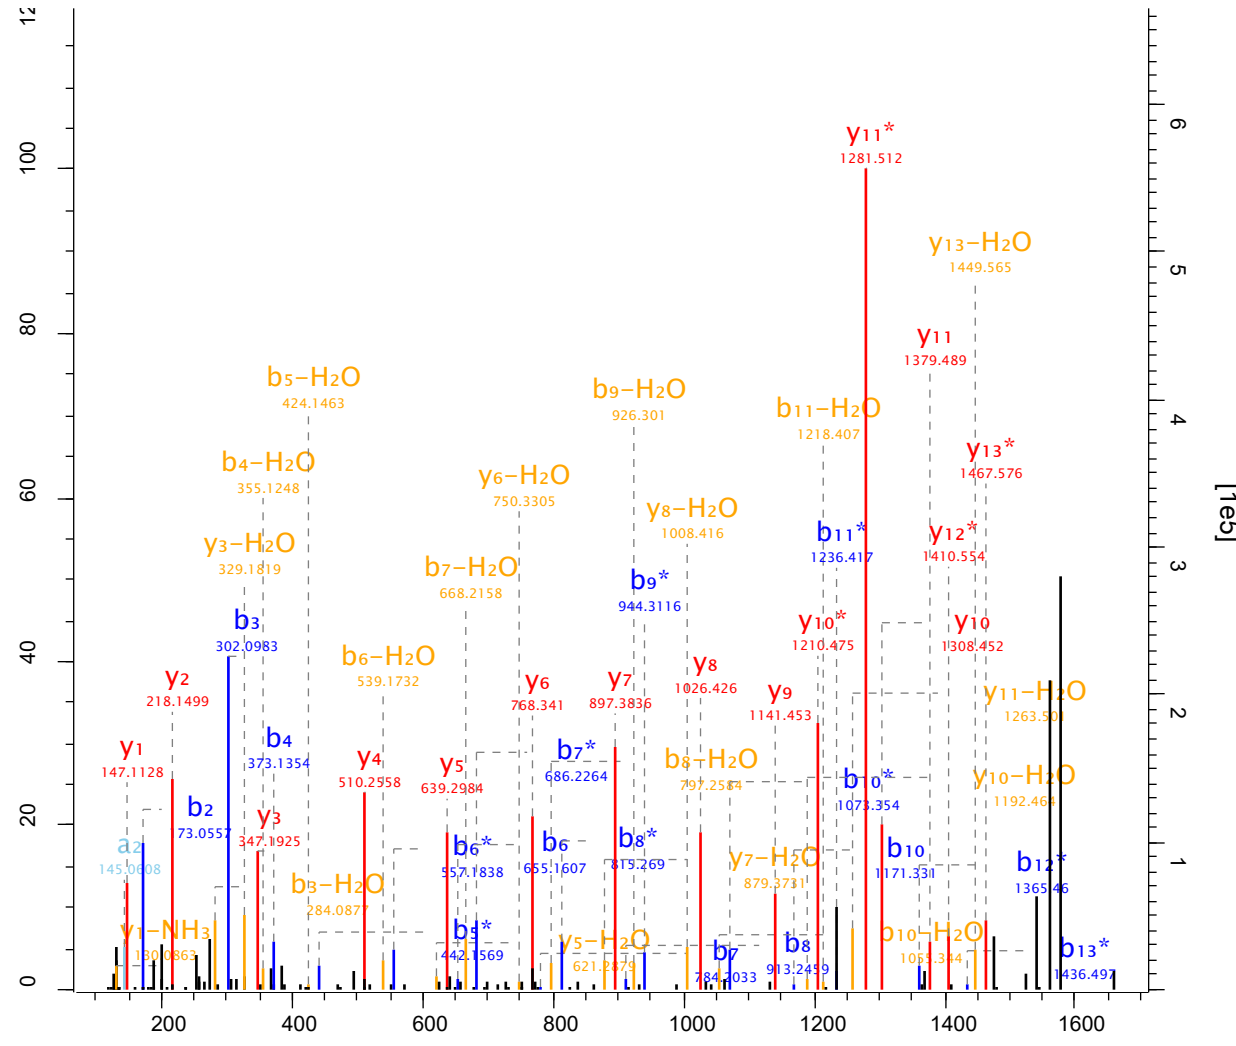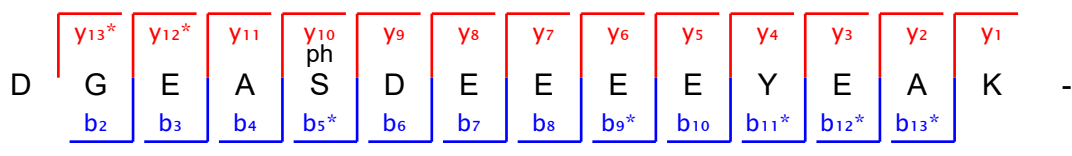



Raw file Scan Method Score m/z  
 sys\_15\_1 15393 FTMS; HCD 134.14 669.73

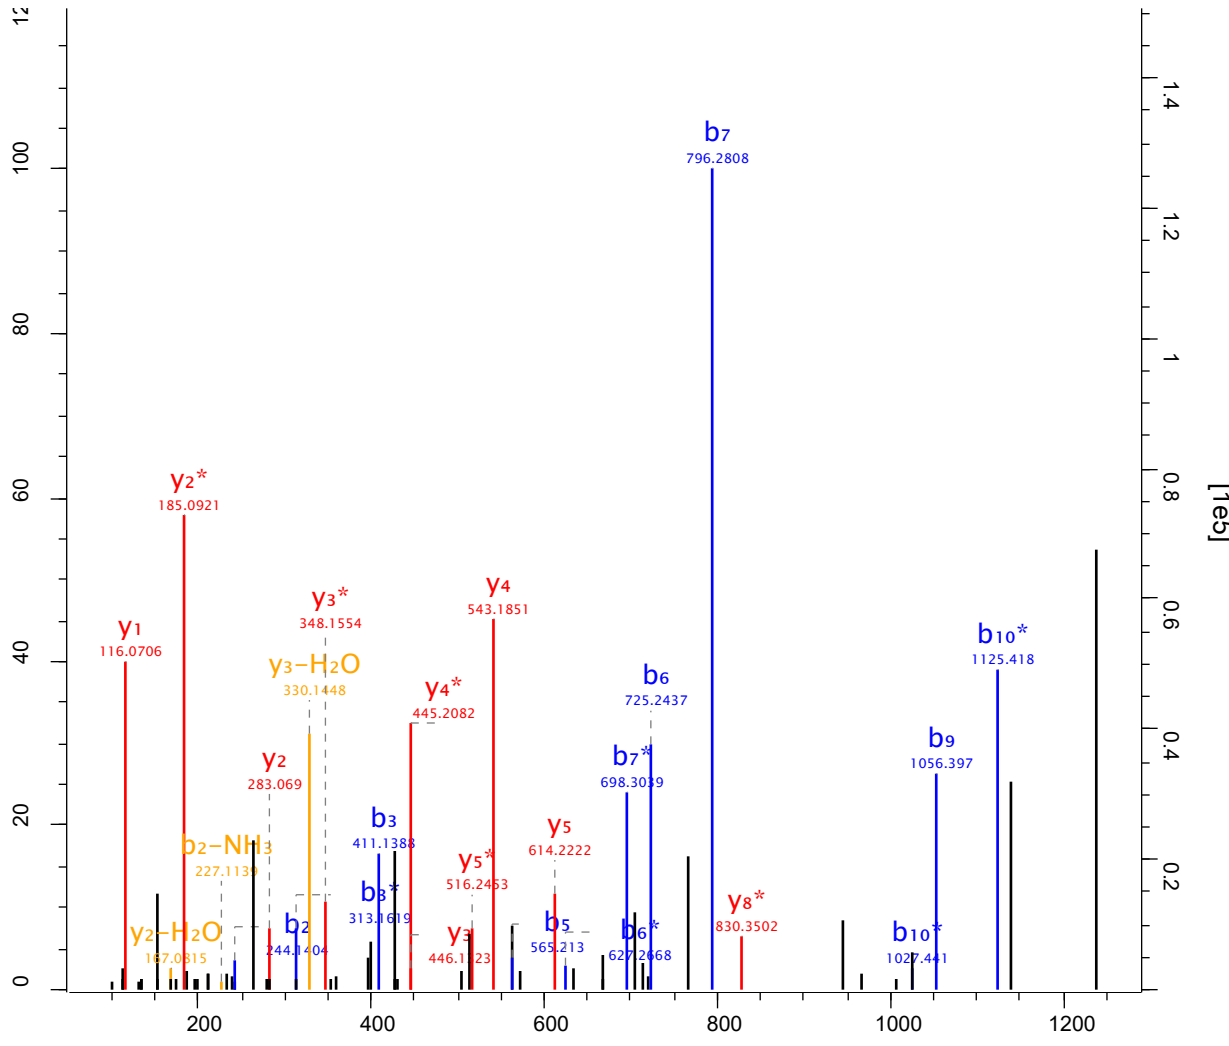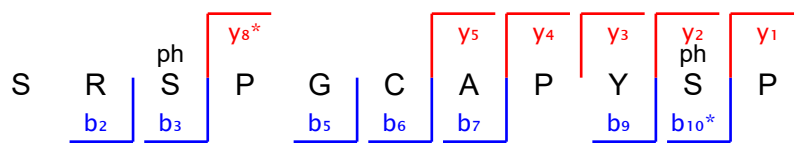

Raw file Scan Method Score m/z  
 sys\_15\_1 15435 FTMS; HCD 102.52 676.3

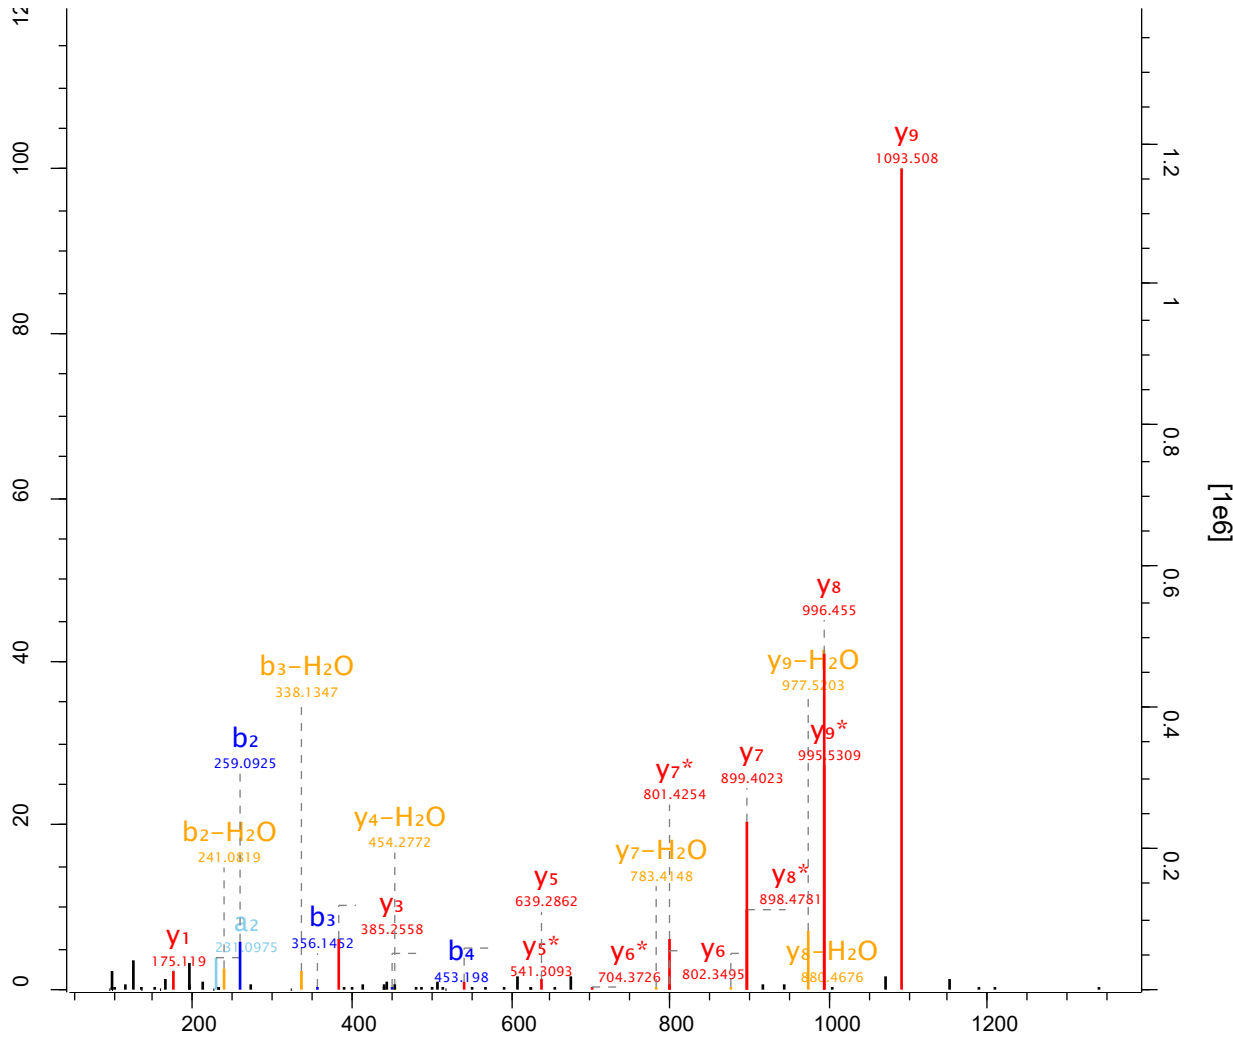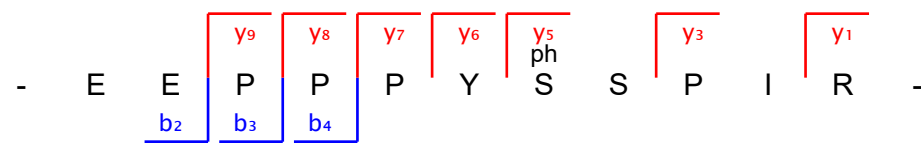

Raw file Scan Method Score m/z  
 sys\_15\_1 15475 FTMS; HCD 68.48 664.27

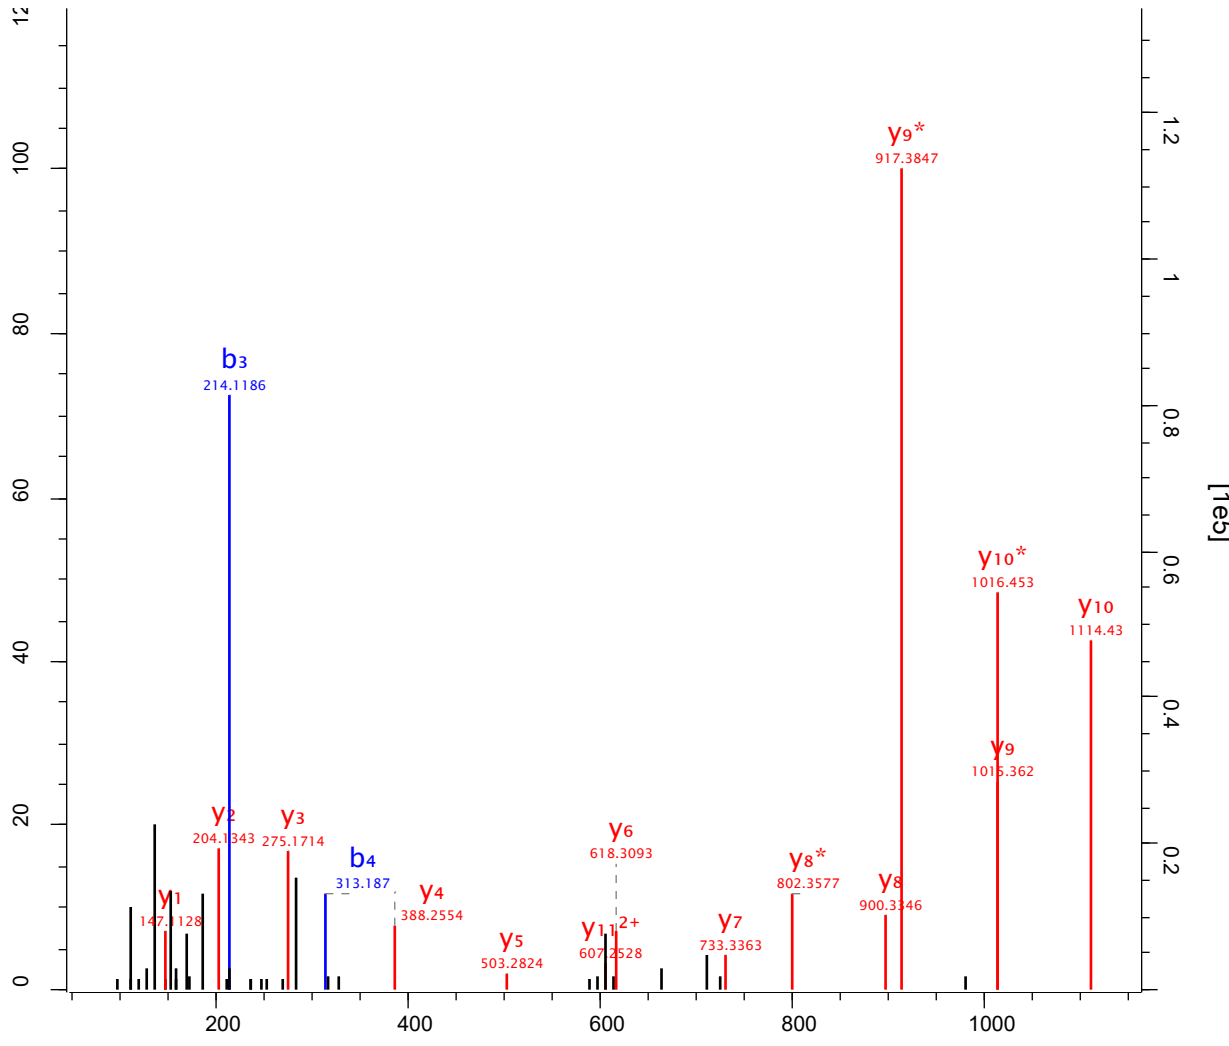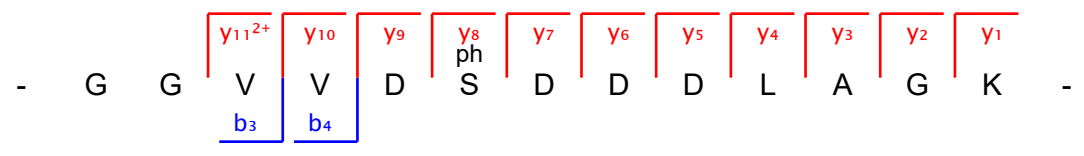

Raw file Scan Method Score m/z  
 sys\_15\_1 15551 FTMS; HCD 66.15 646.25

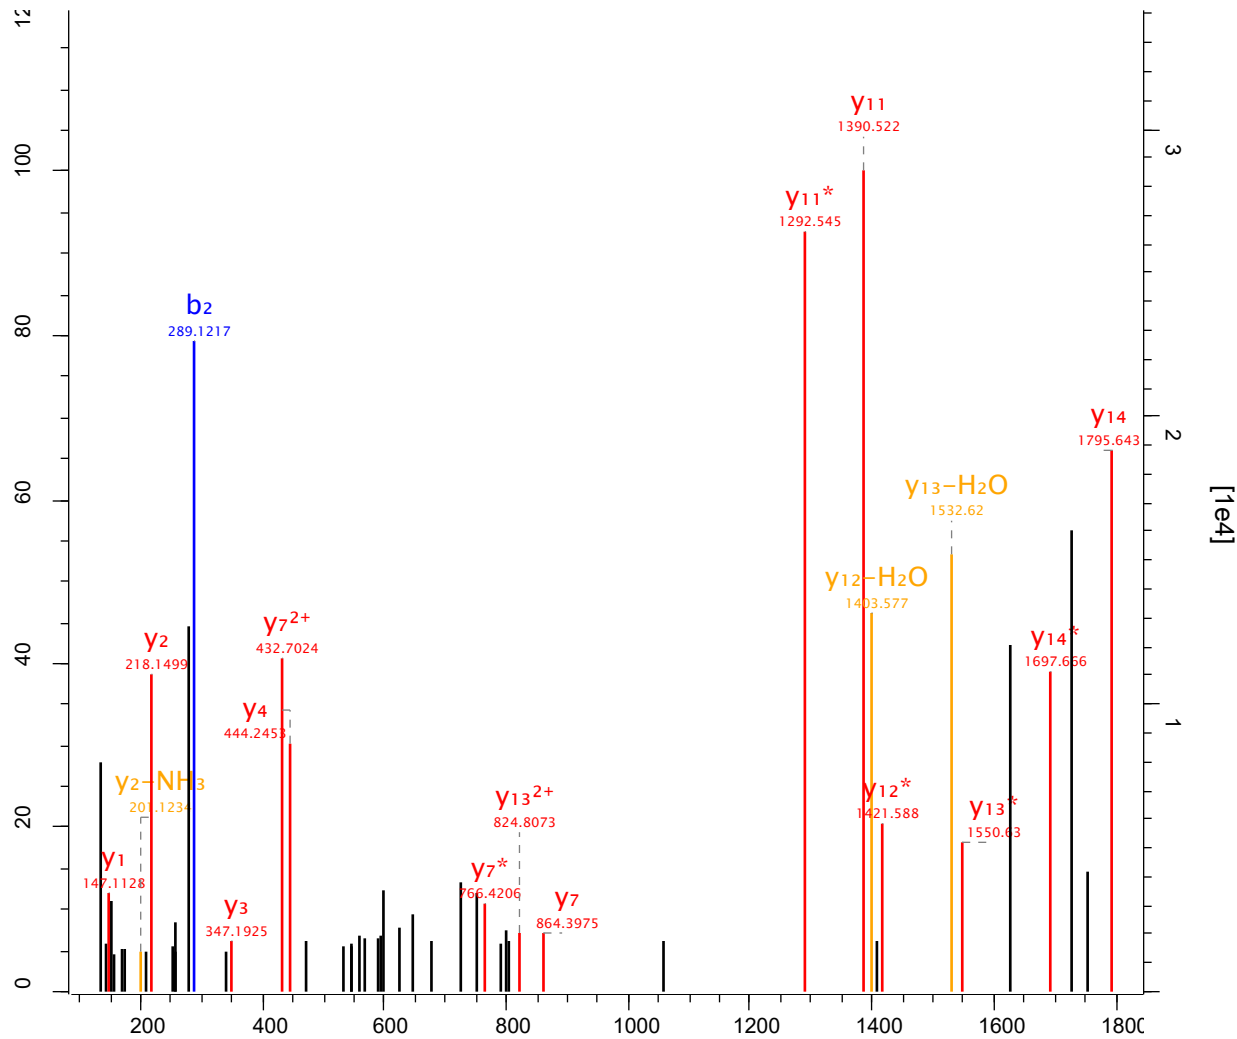

ac V M E E G C Q T P R S P E A K  
 -  
 -

Fragmentation labels: y<sub>14</sub>OX, y<sub>13</sub>\*, y<sub>12</sub>\*, y<sub>11</sub>, y<sub>7</sub>, y<sub>4</sub>, y<sub>3</sub>, y<sub>2</sub>, y<sub>1</sub>, b<sub>2</sub>

Raw file Scan Method Score m/z  
 sys\_15\_1 1558 FTMS; HCD 81.95 421.17

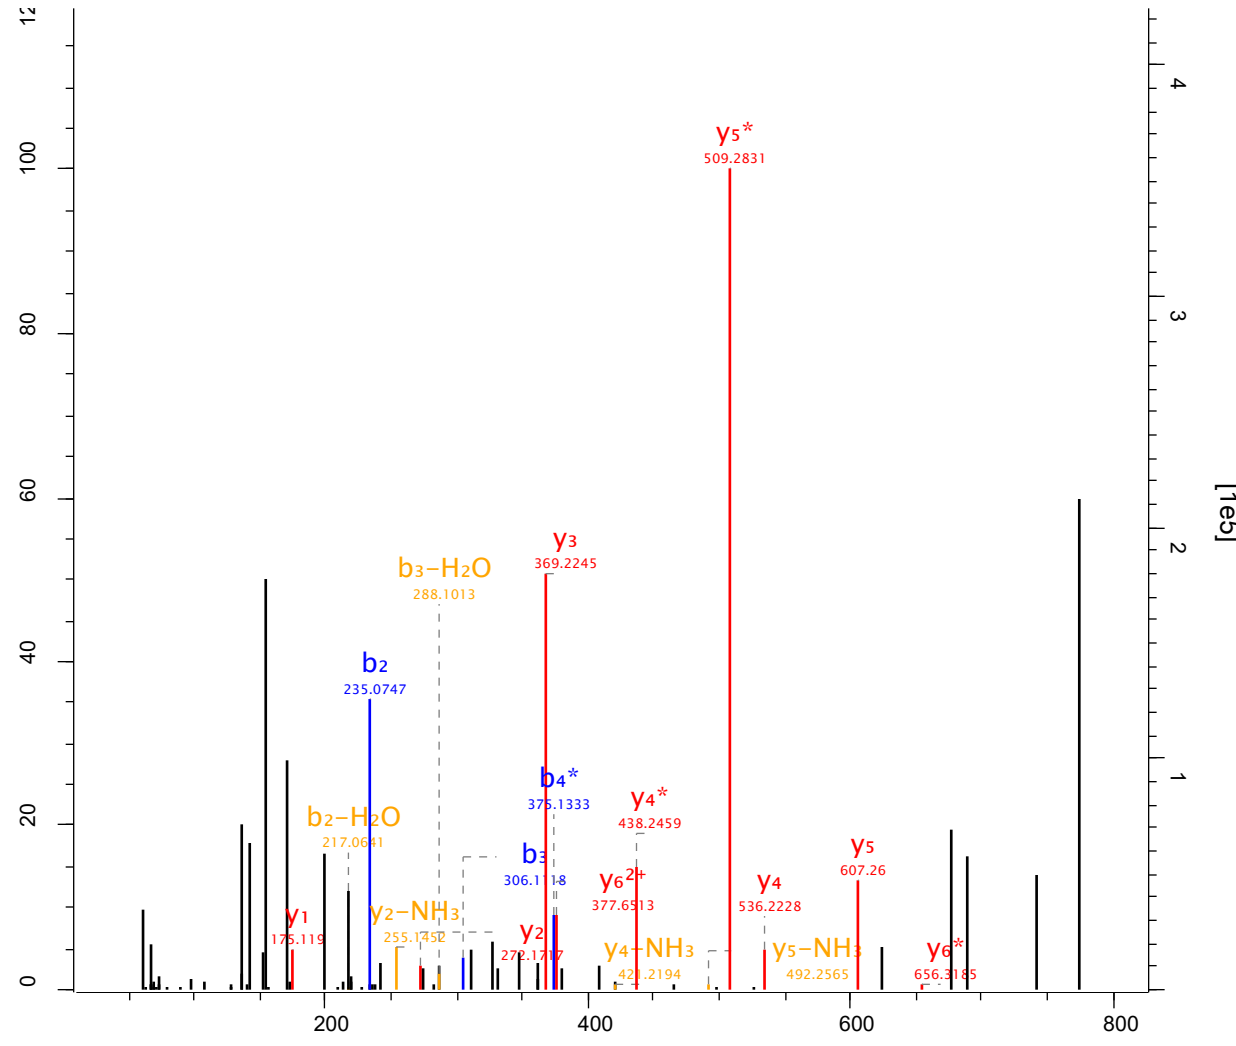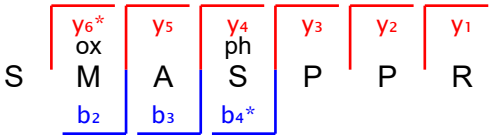

Raw file Scan Method Score m/z  
 sys\_15\_1 15622 FTMS; HCD 54.34 593.75

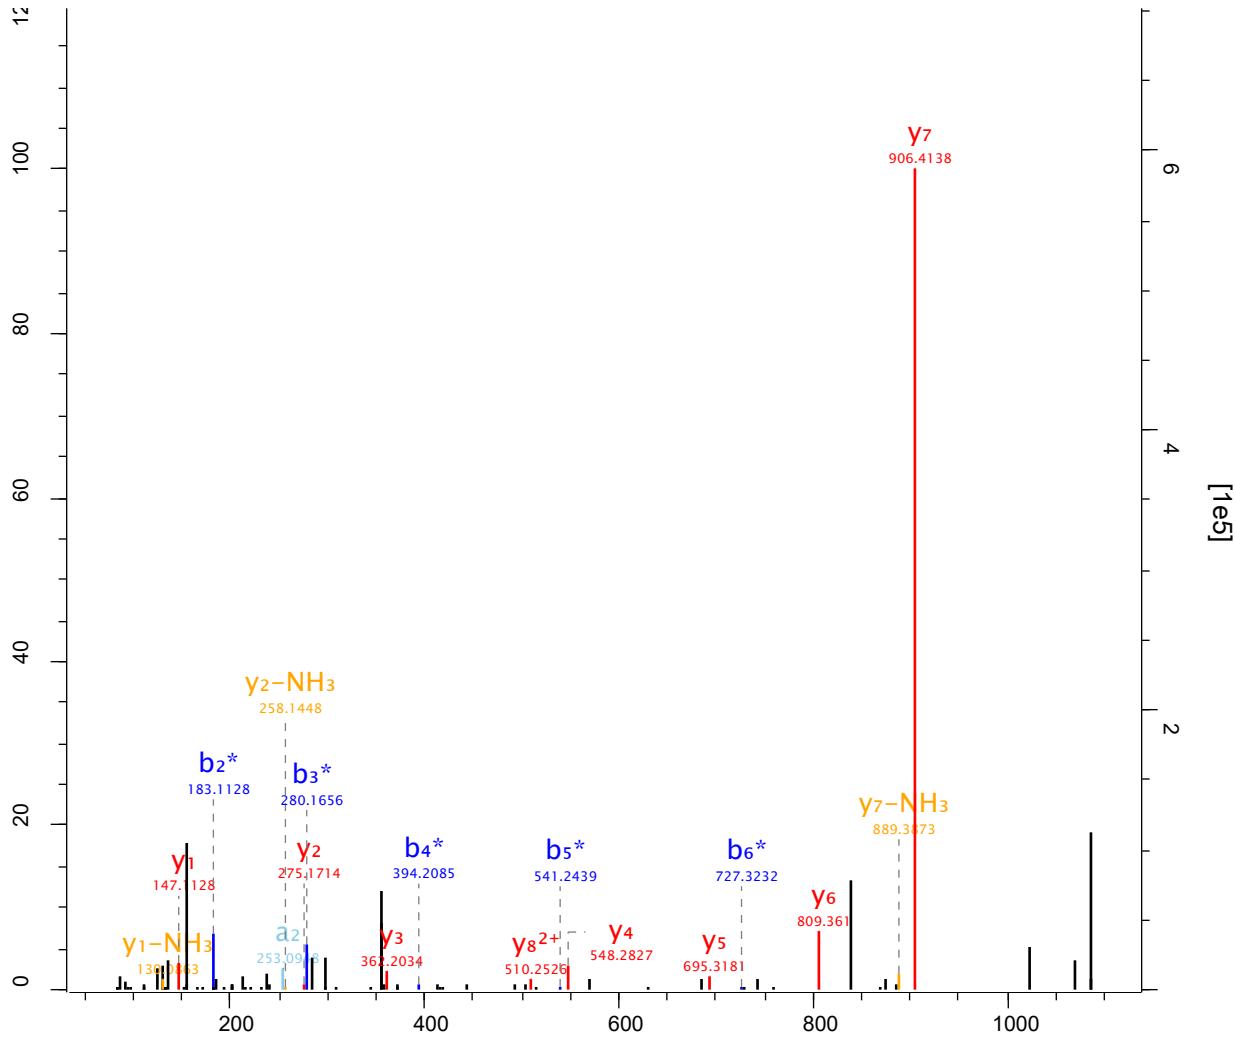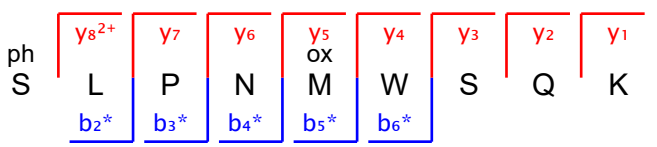

Raw file Scan Method Score m/z  
 sys\_15\_1 15645 FTMS; HCD 48.22 728.81

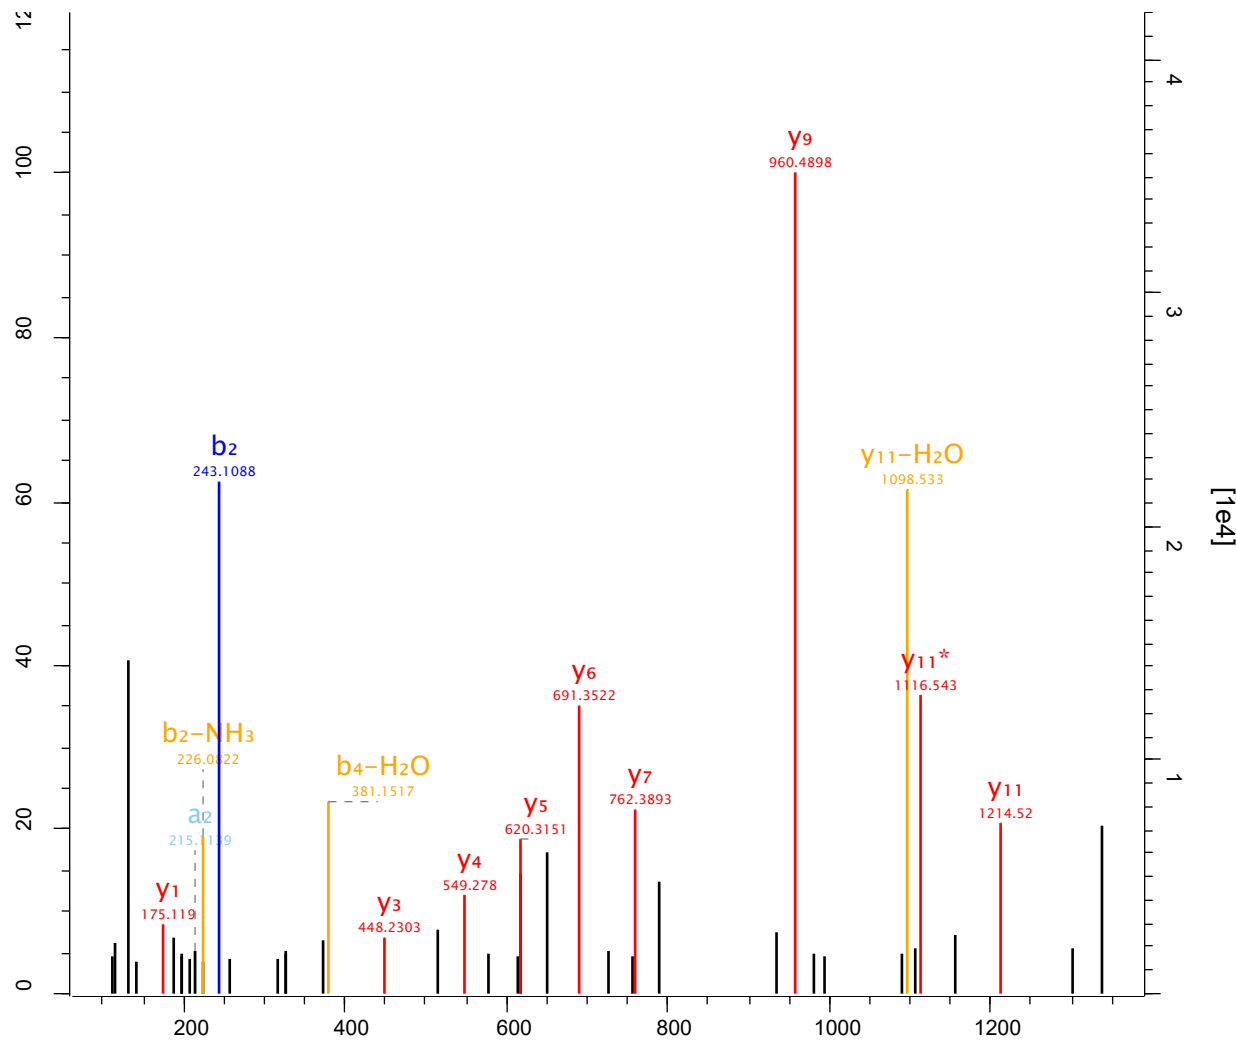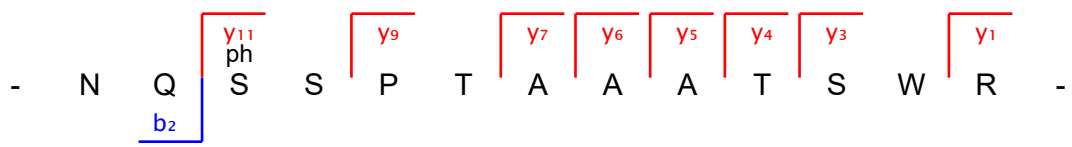

Raw file Scan Method Score m/z  
 sys\_15\_1 15684 FTMS; HCD 118.05 1013.46

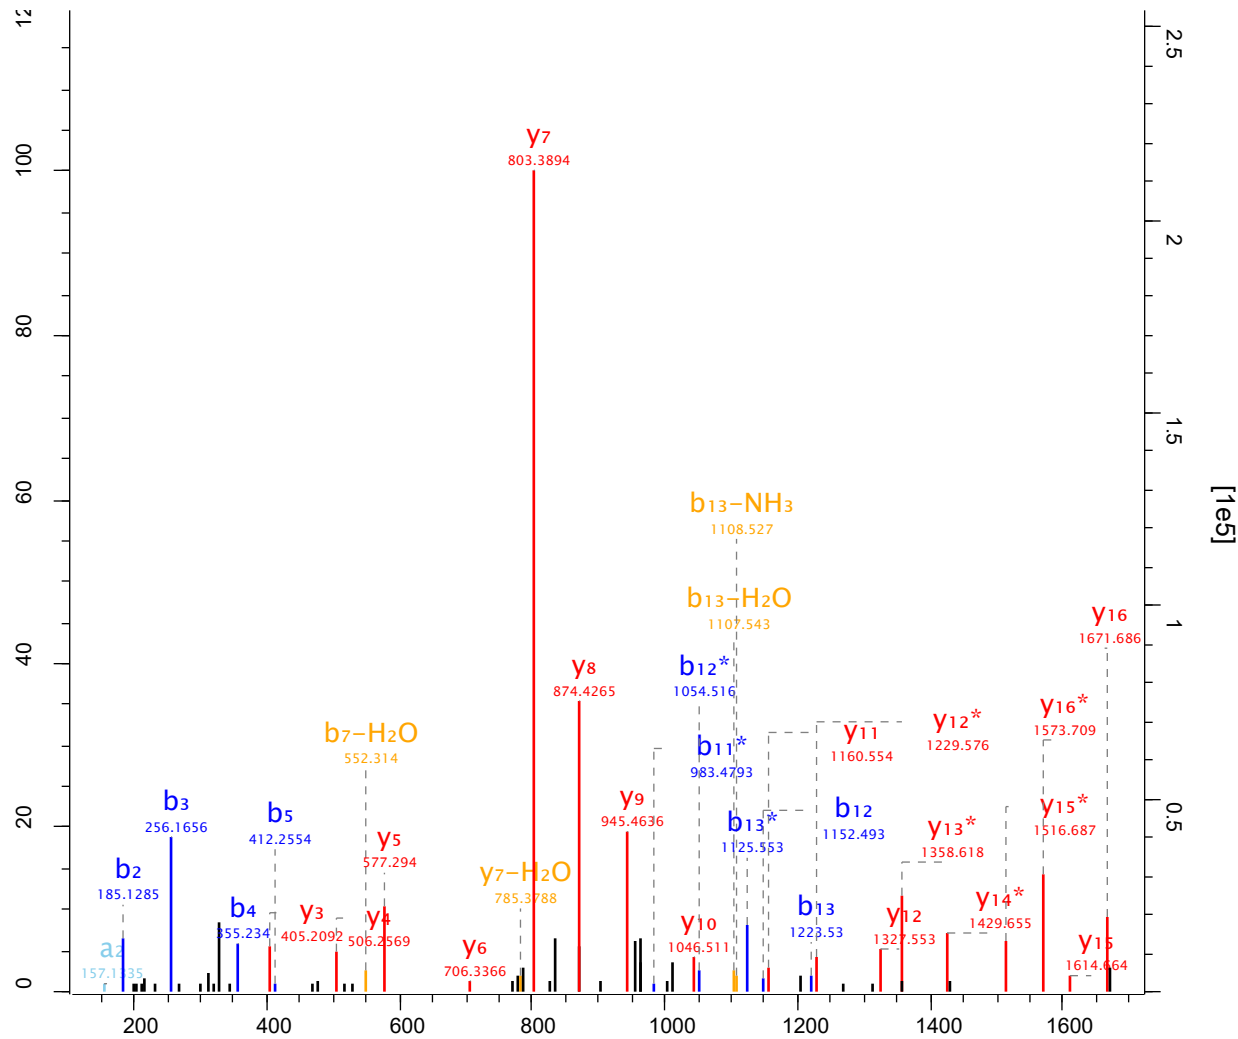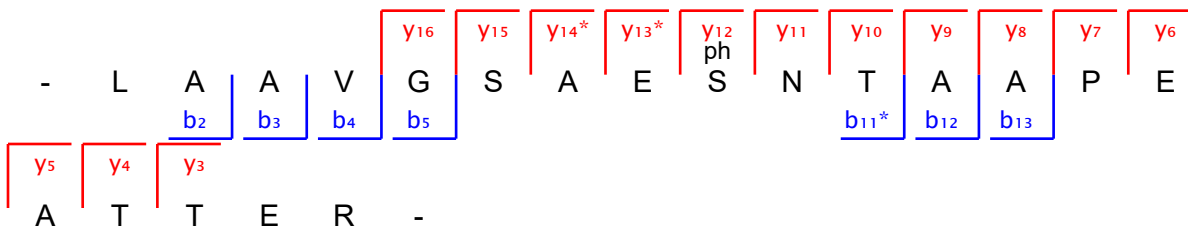



Raw file Scan Method Score m/z  
 sys\_15\_1 15880 FTMS; HCD 133.47 620.24

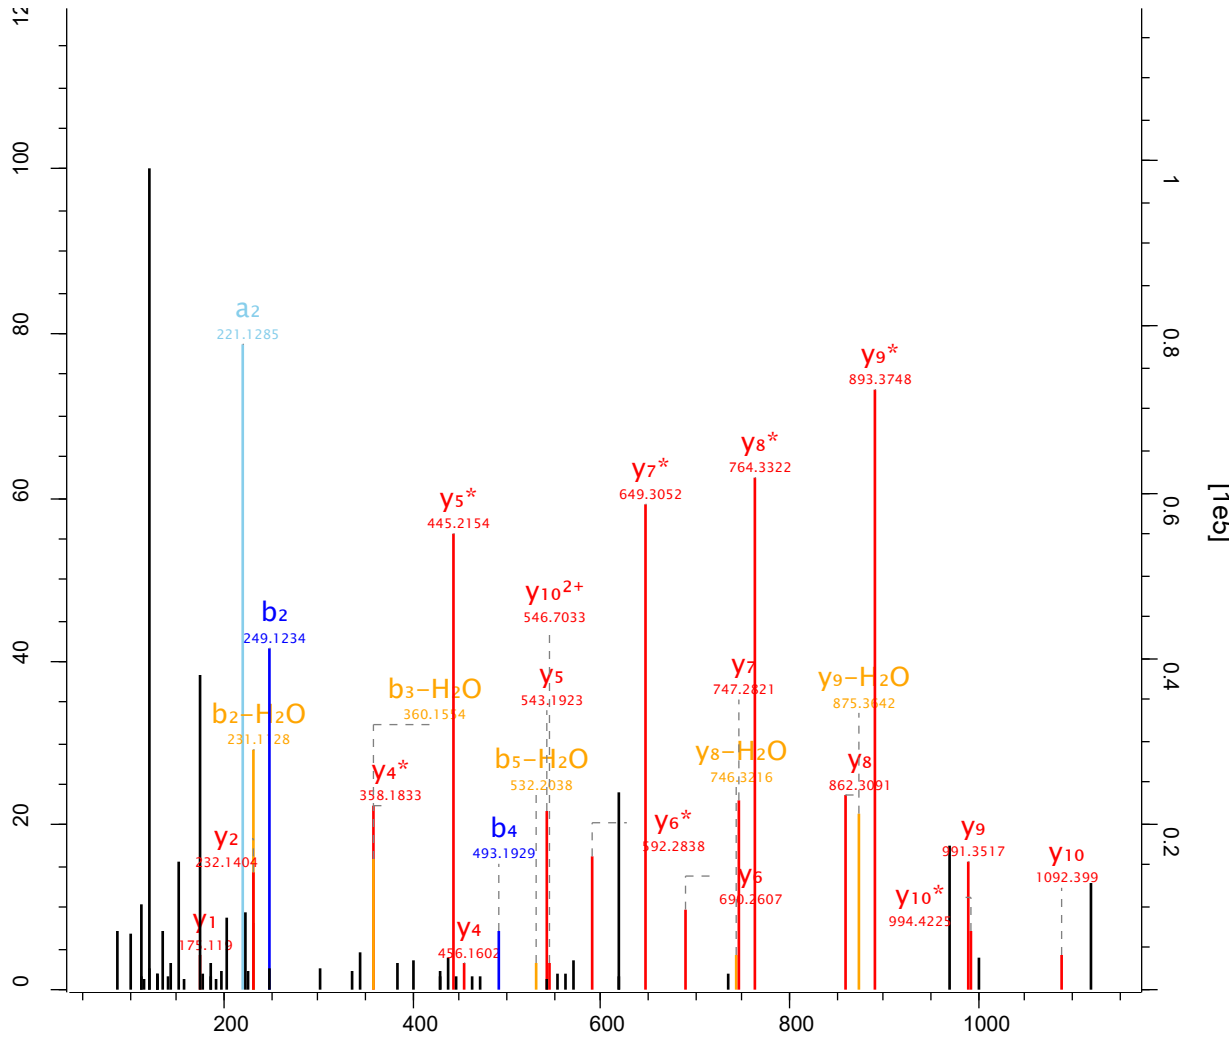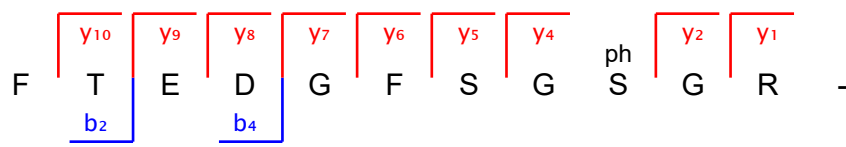

Raw file Scan Method Score m/z  
 sys\_15\_1 15968 FTMS; HCD 61.28 624.93

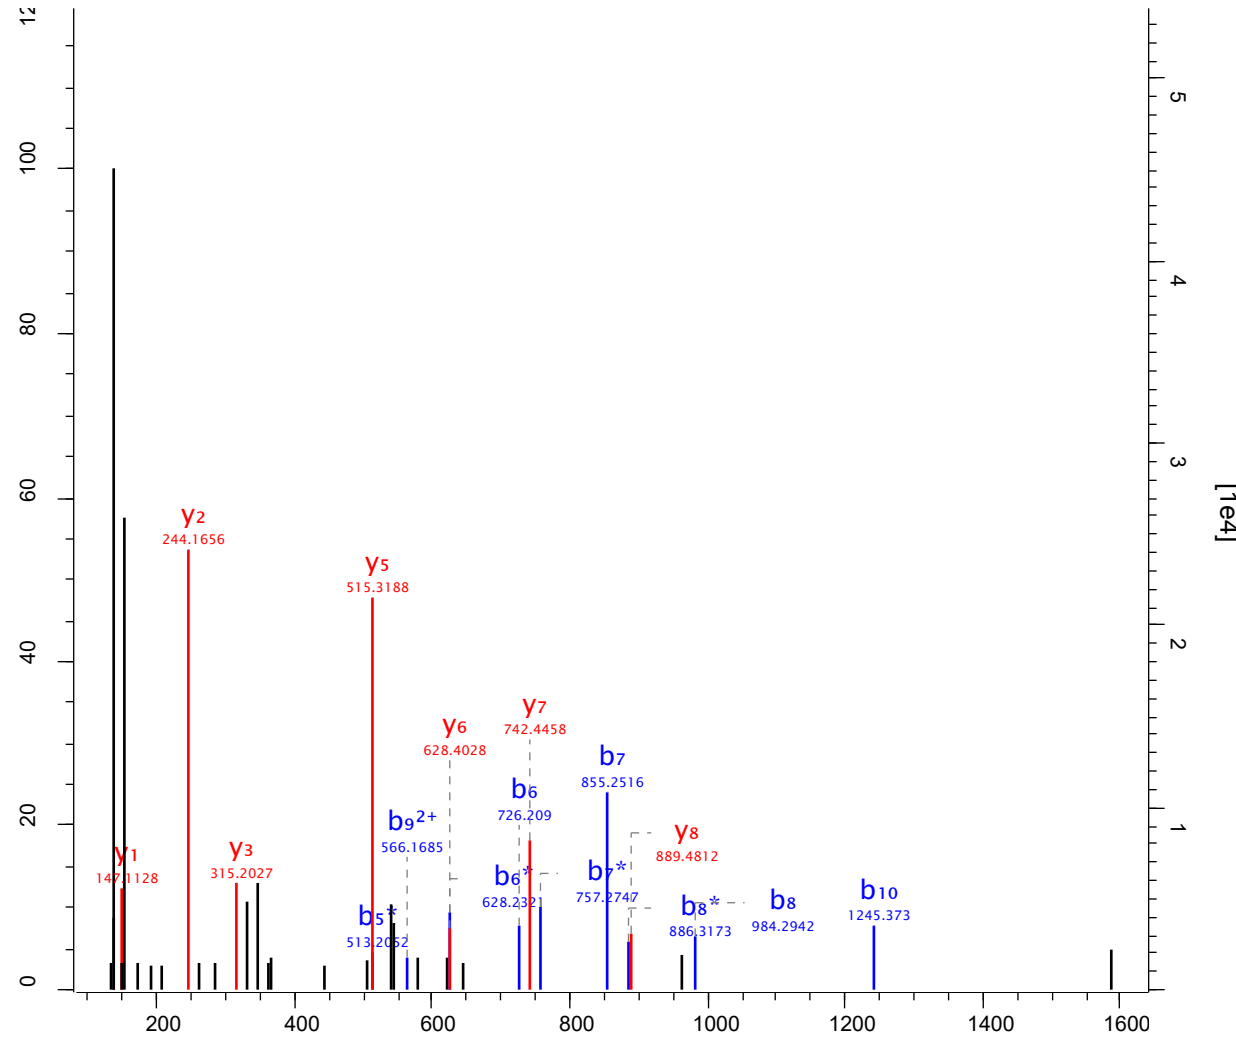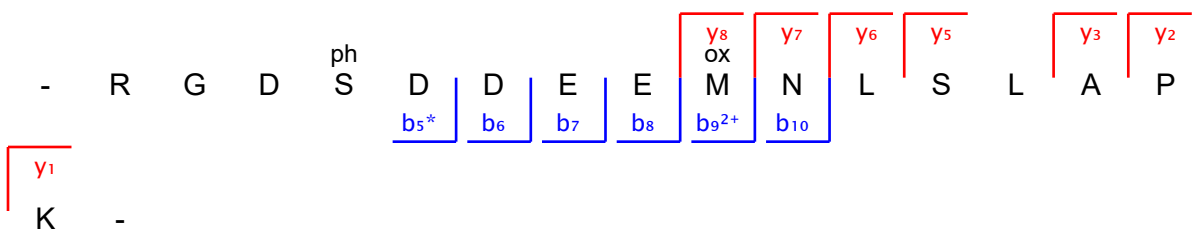

Raw file Scan Method Score m/z  
 sys\_15\_1 16033 FTMS; HCD 75.09 681.28

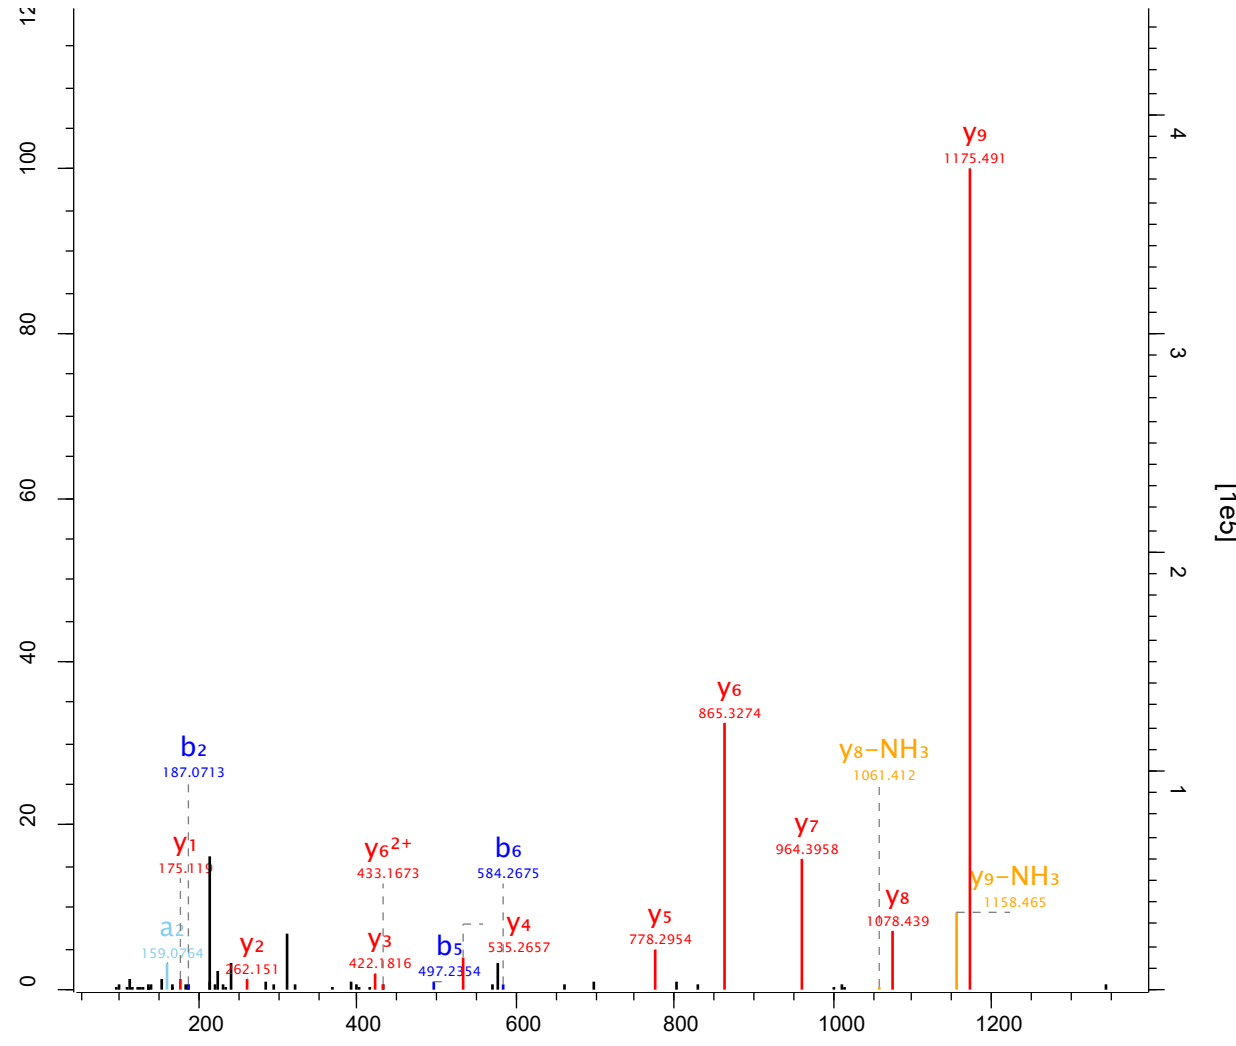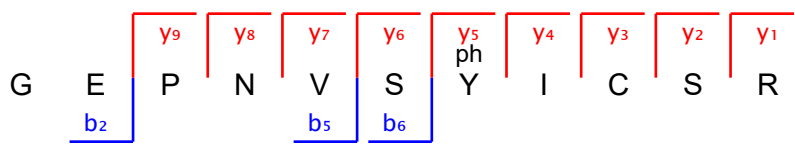

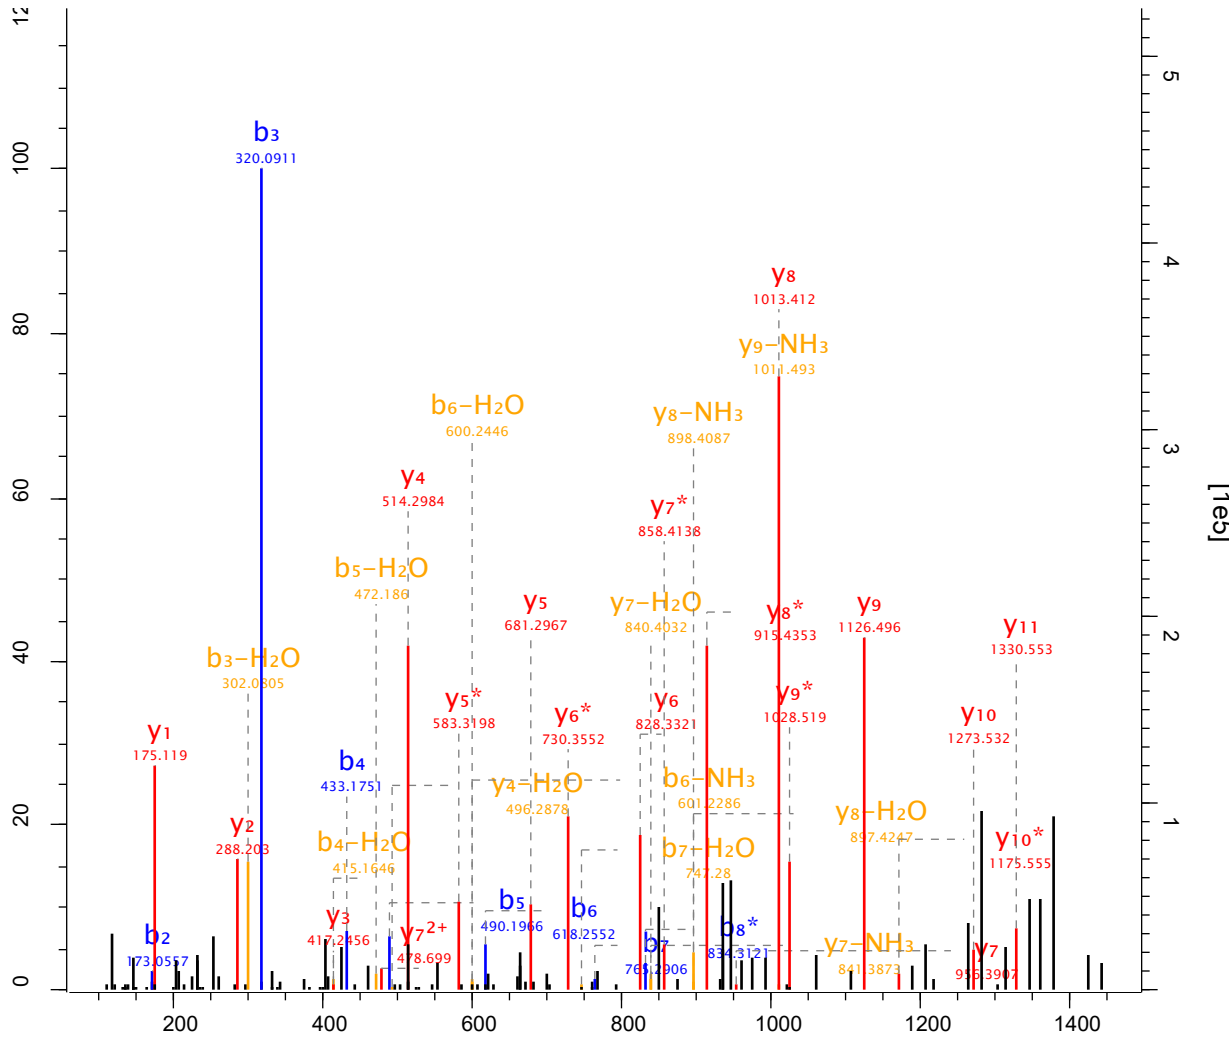

- D G M L G Q M S P E I R -

b2 b3 b4 b5 b6 b7 b8\*

y11 y10 ox y9 y8 y7 y6 ox y5 ph y4 y3 y2 y1

Raw file Scan Method Score m/z  
 sys\_15\_1 16236 FTMS; HCD 92.46 780.67

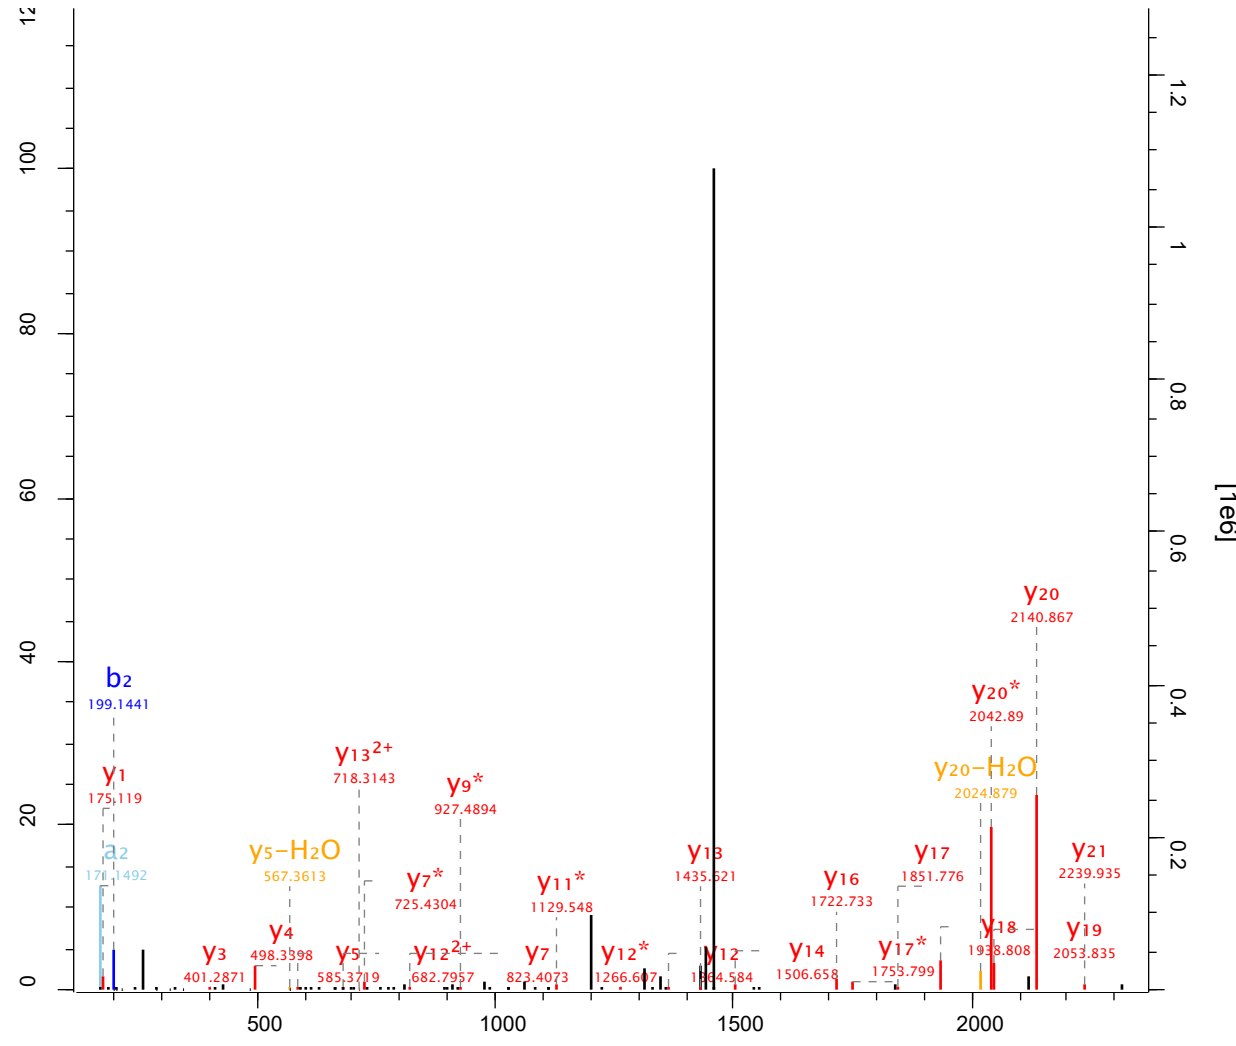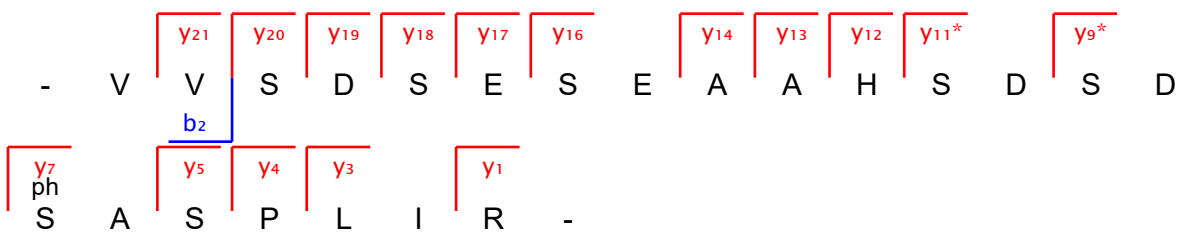

Raw file Scan Method Score m/z  
 sys\_15\_1 16367 FTMS; HCD 152.34 686.29

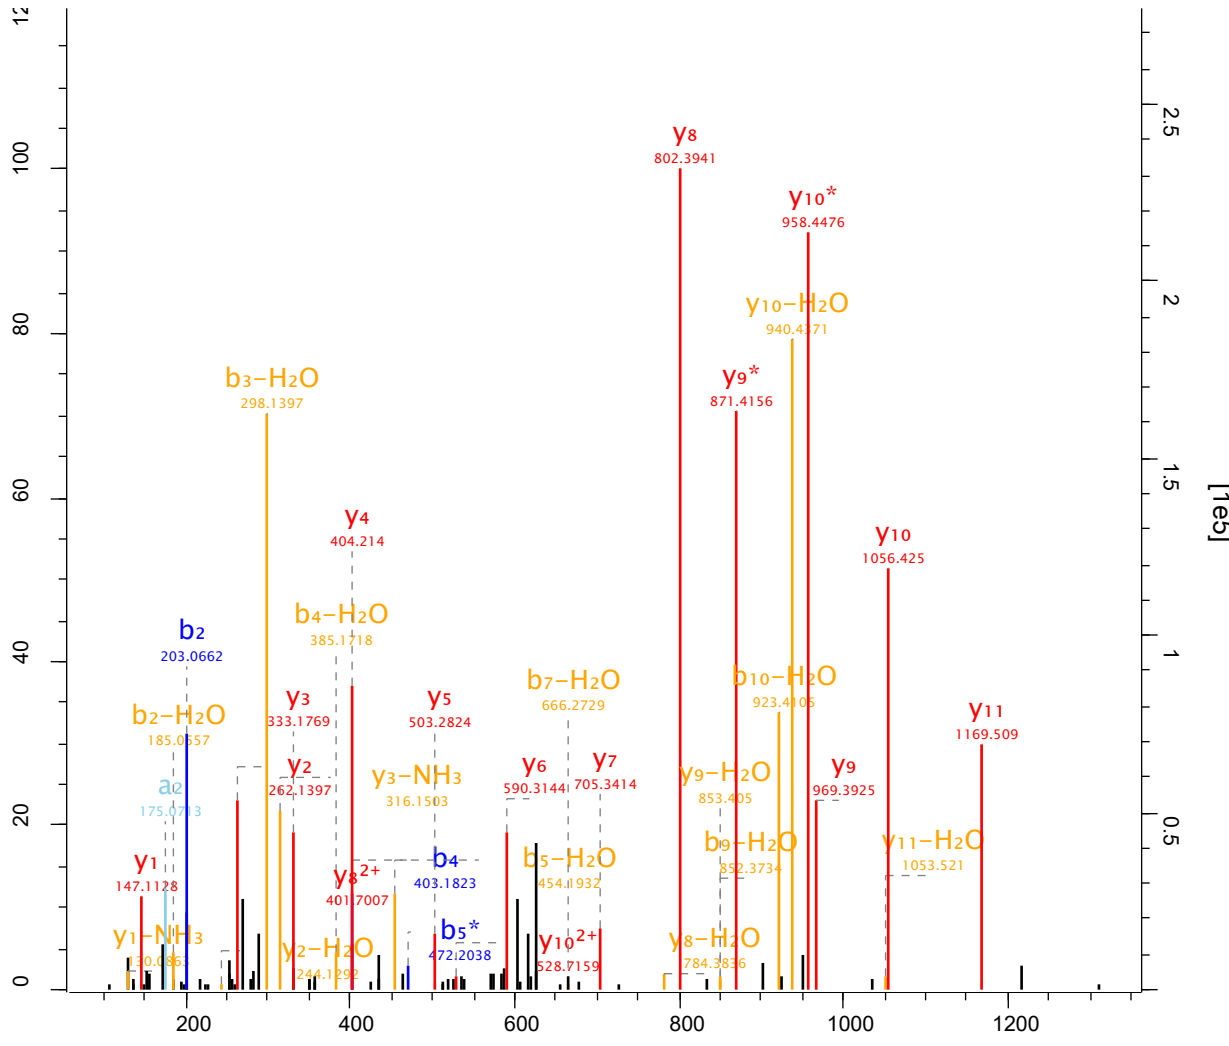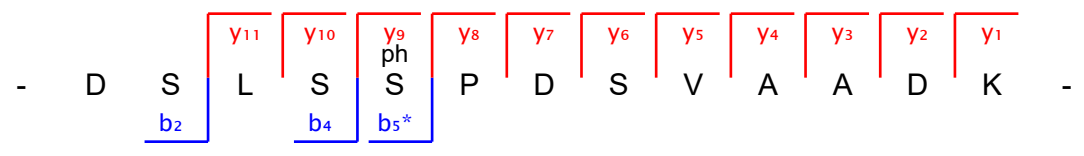

Raw file Scan Method Score m/z  
 sys\_15\_1 16386 FTMS; HCD 60.16 615.27

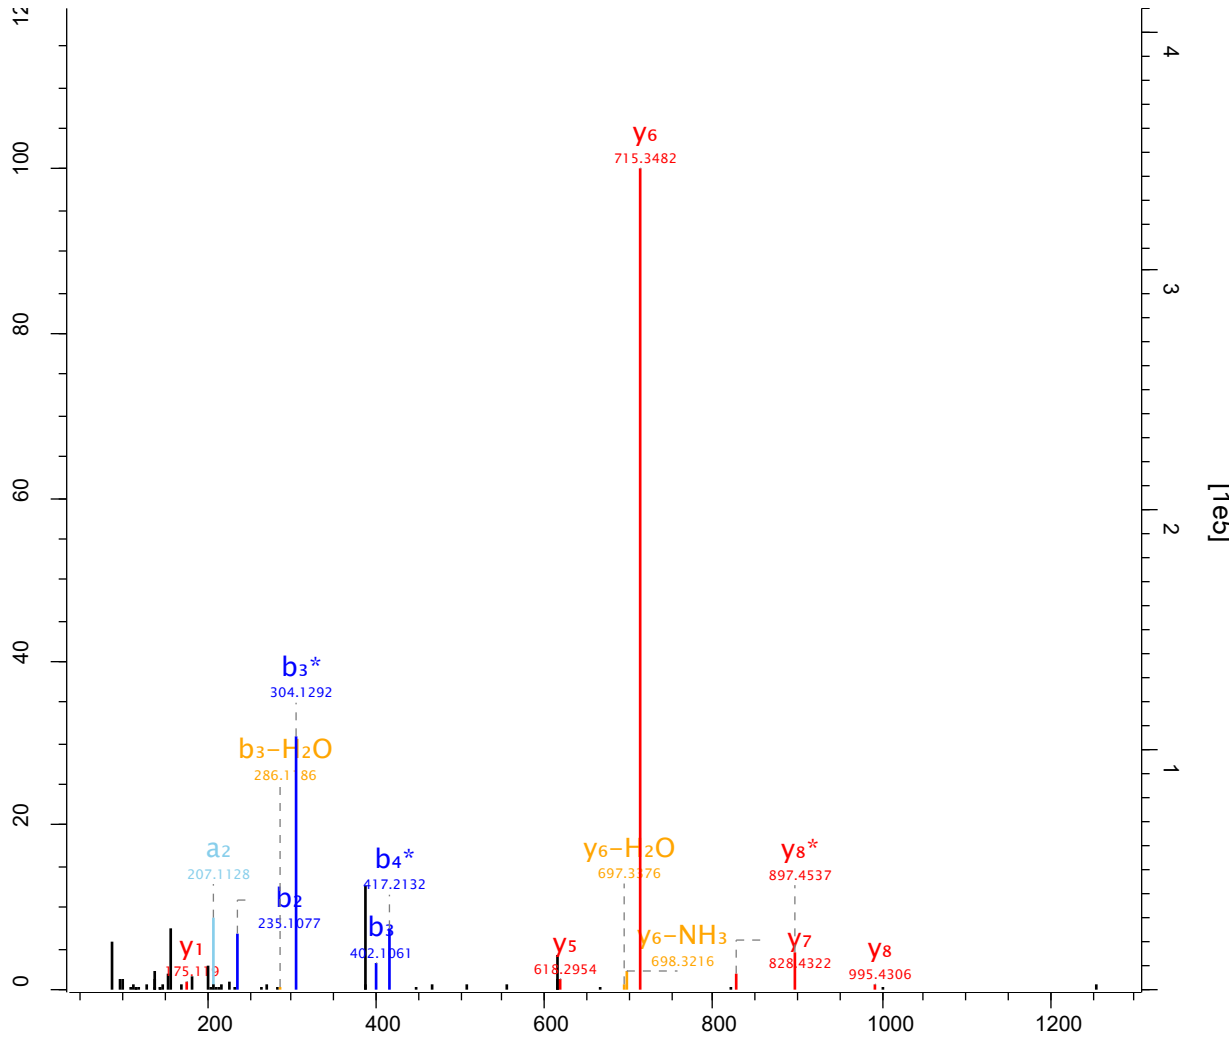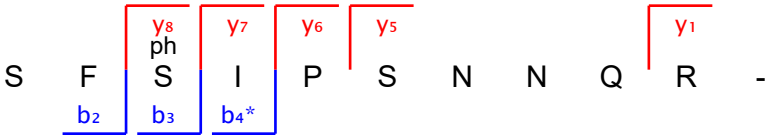

Raw file Scan Method Score m/z  
 sys\_15\_1 16413 FTMS; HCD 47.55 698.24

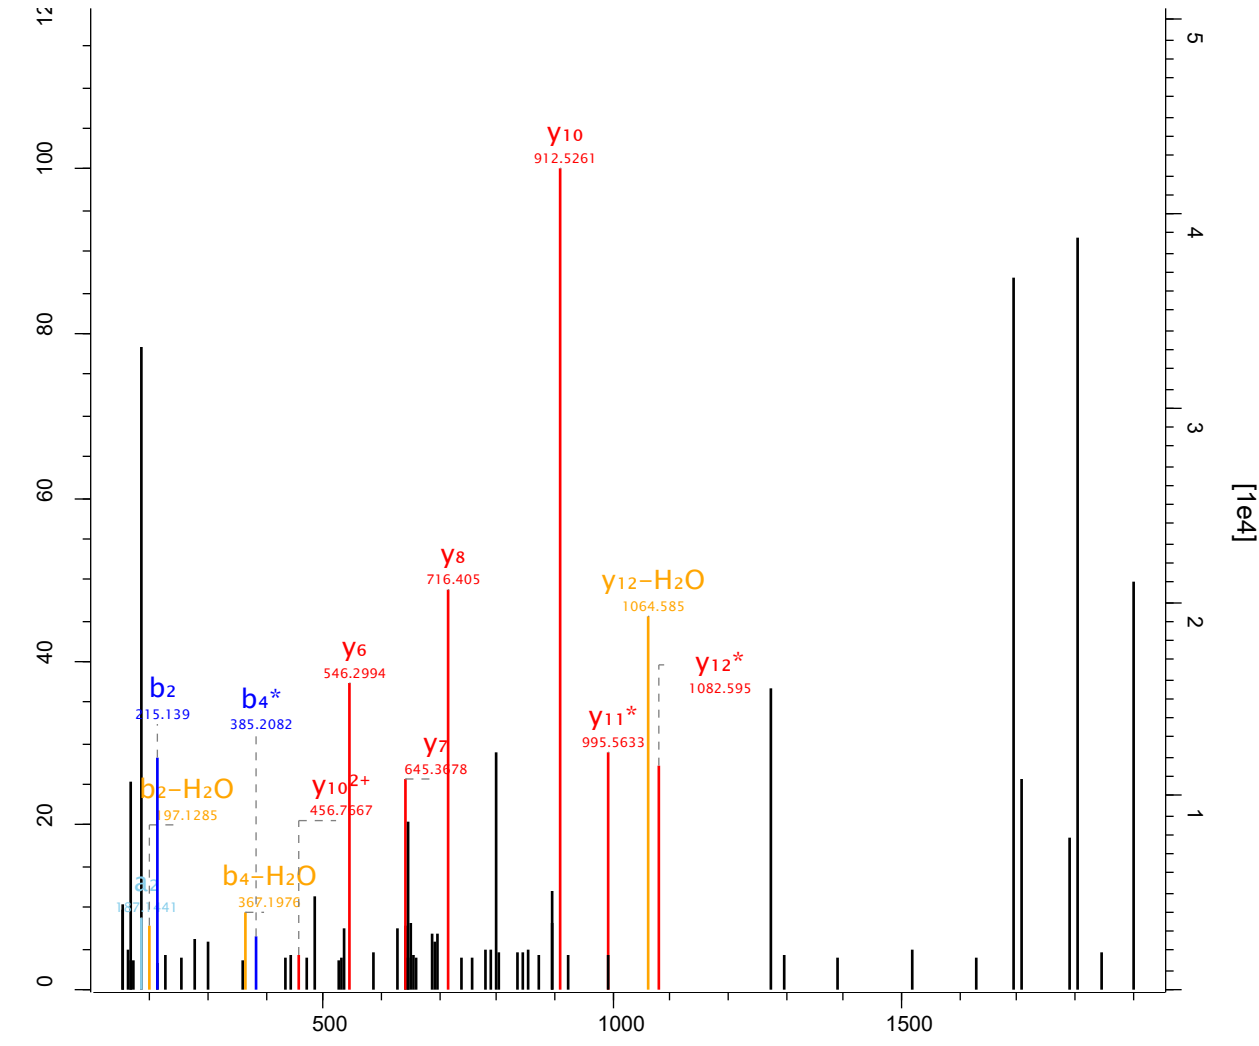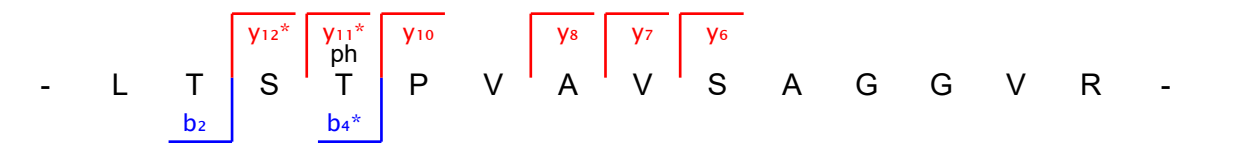



Raw file Scan Method Score m/z  
 sys\_15\_1 16442 FTMS; HCD 182.22 873.36

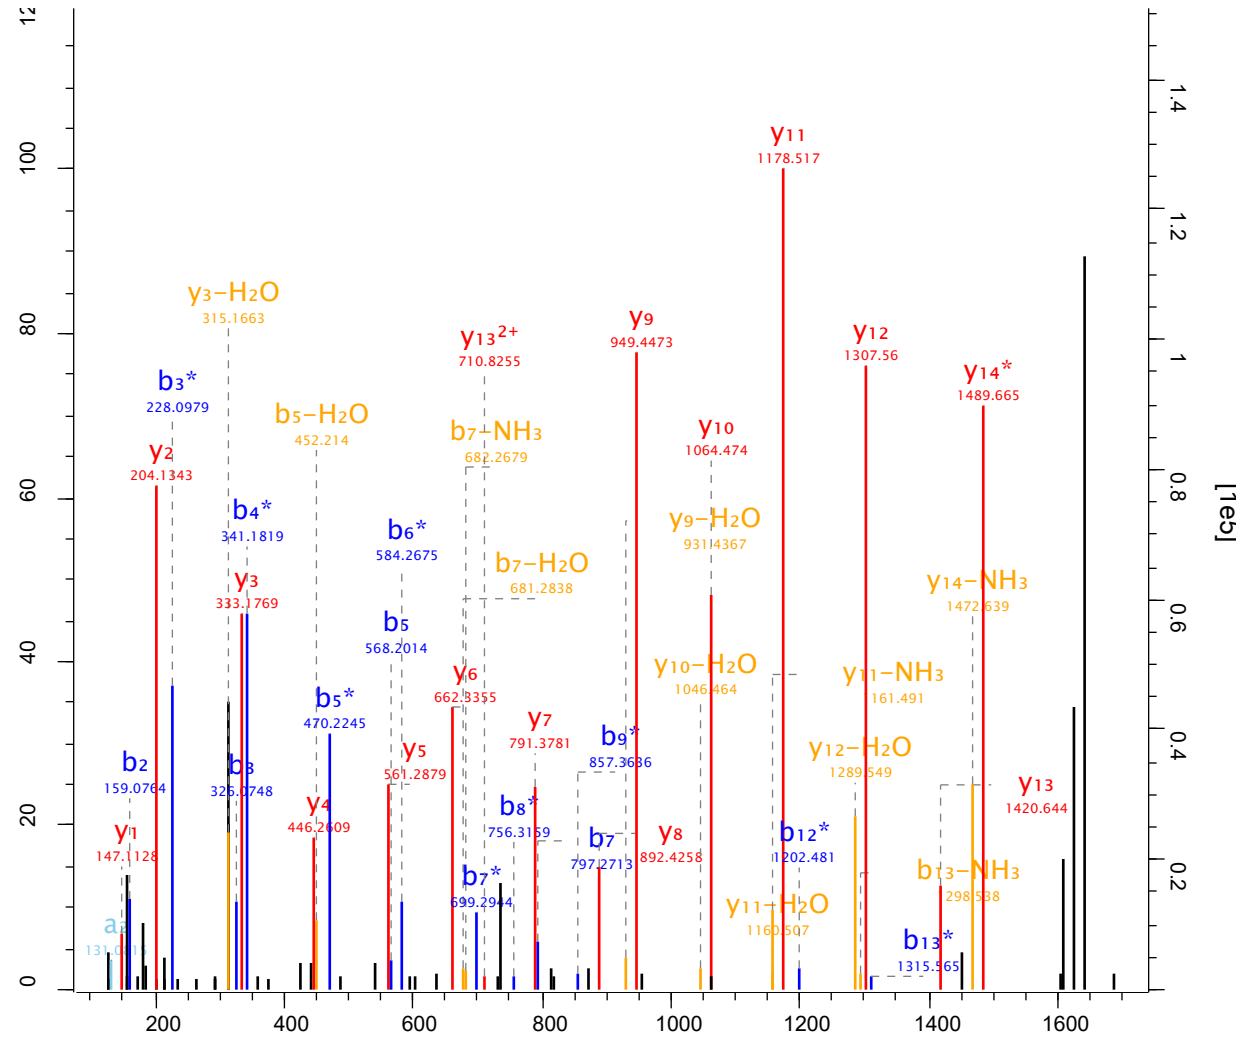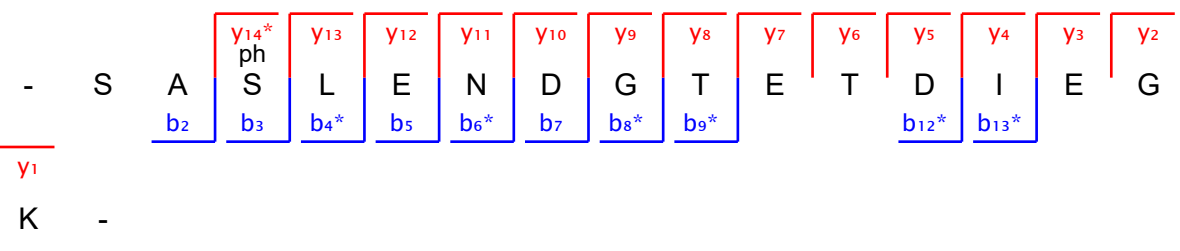

Raw file Scan Method Score m/z  
 sys\_15\_1 16502 FTMS; HCD 116.87 720.83

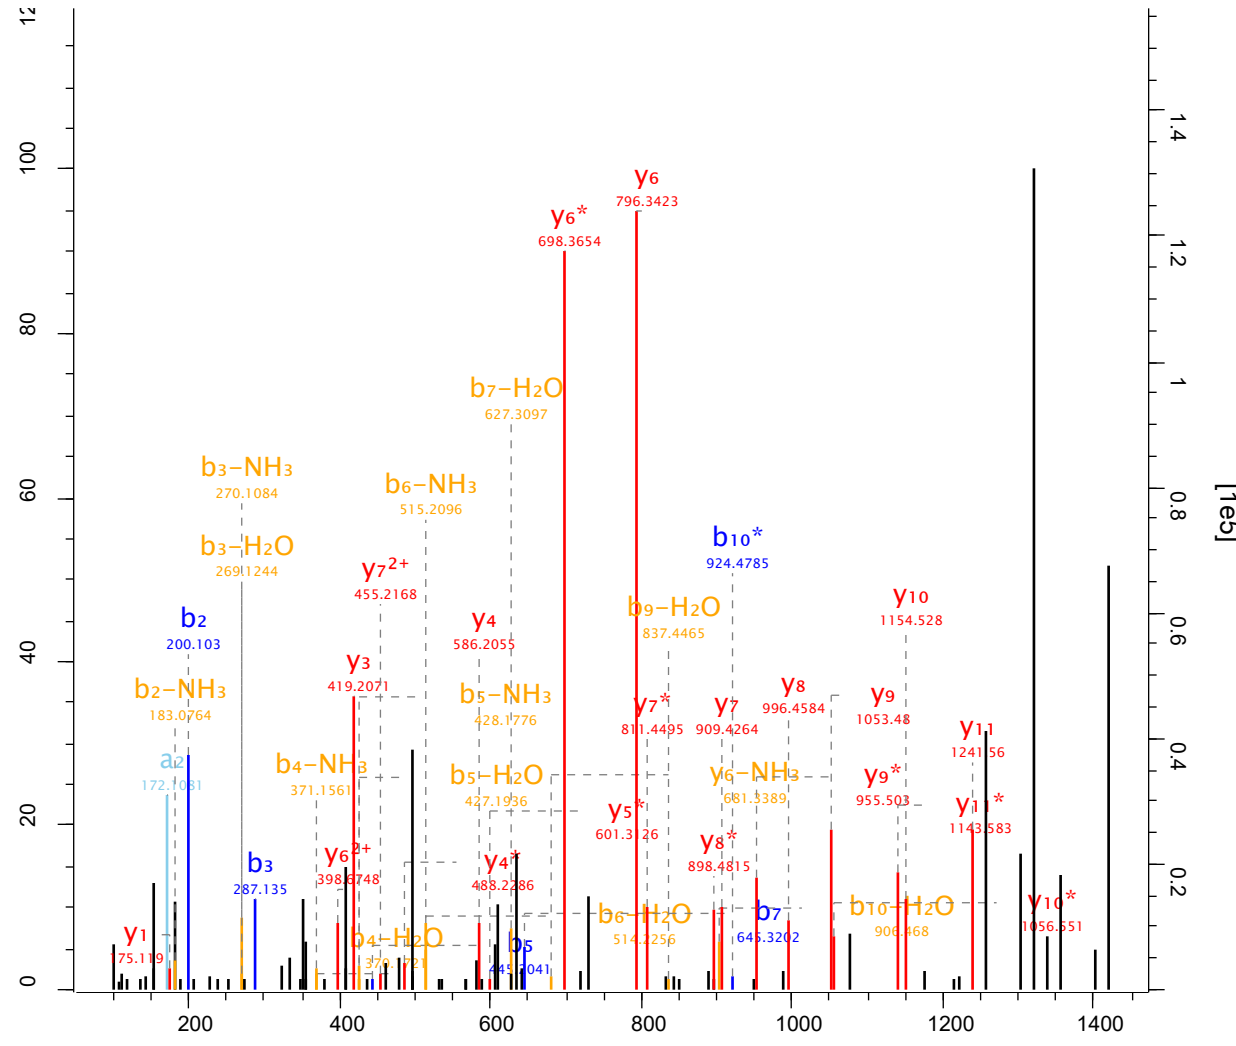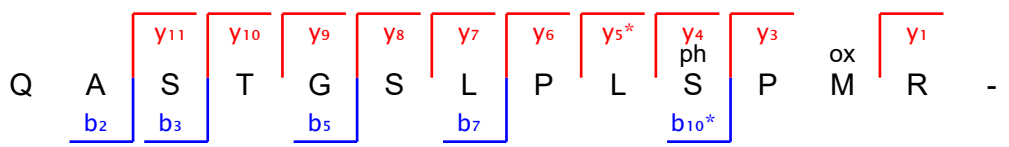

Raw file Scan Method Score m/z  
 sys\_15\_1 16533 FTMS; HCD 80.31 540.76

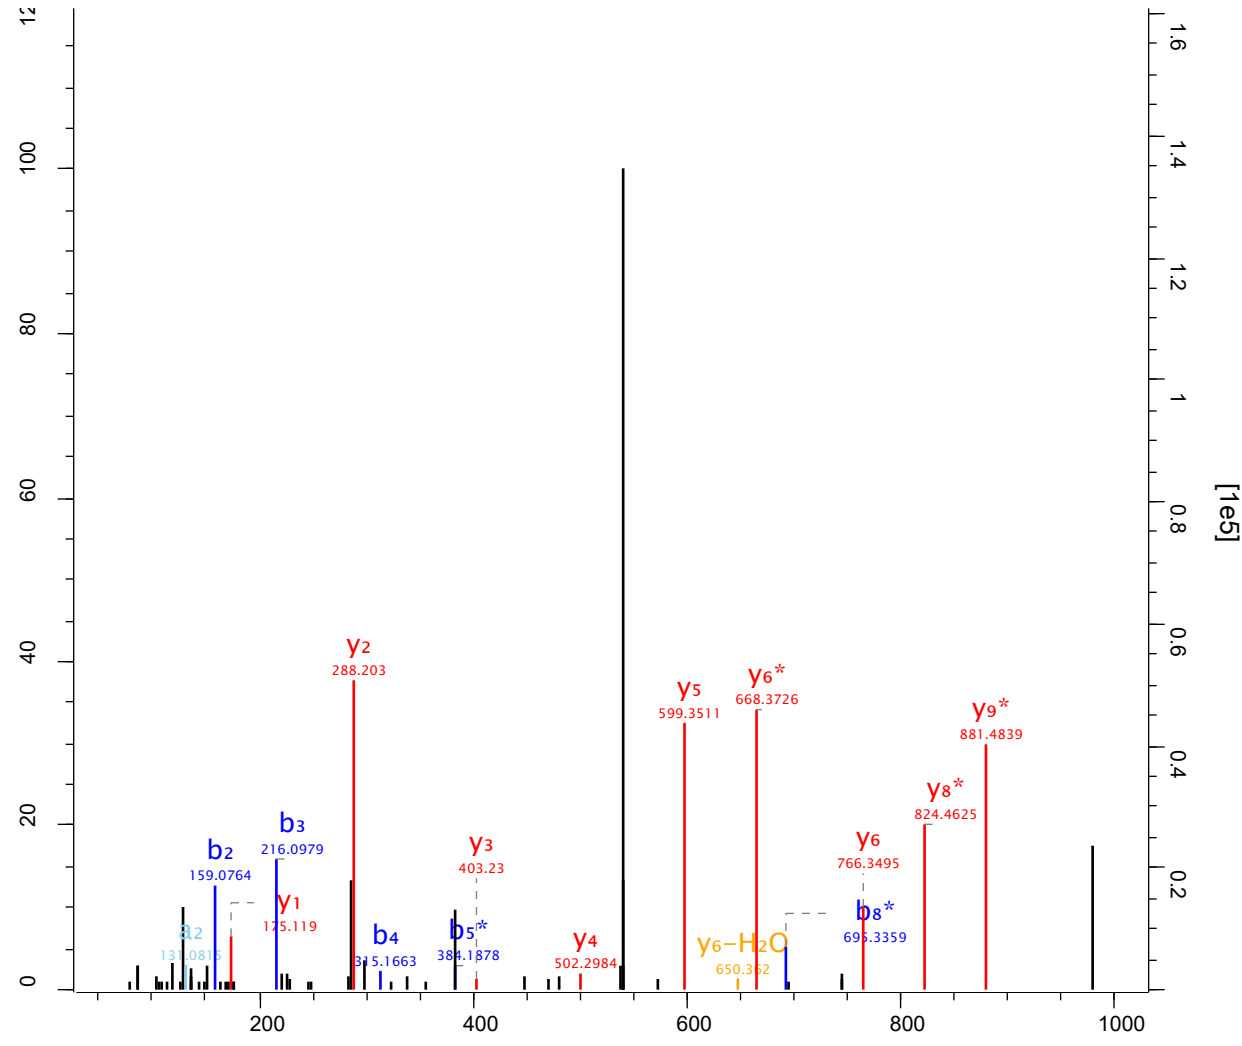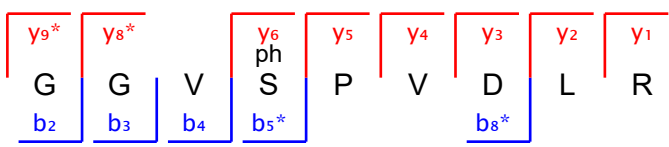

Raw file Scan Method Score m/z  
 sys\_15\_1 16536 FTMS; HCD 142.85 656.64

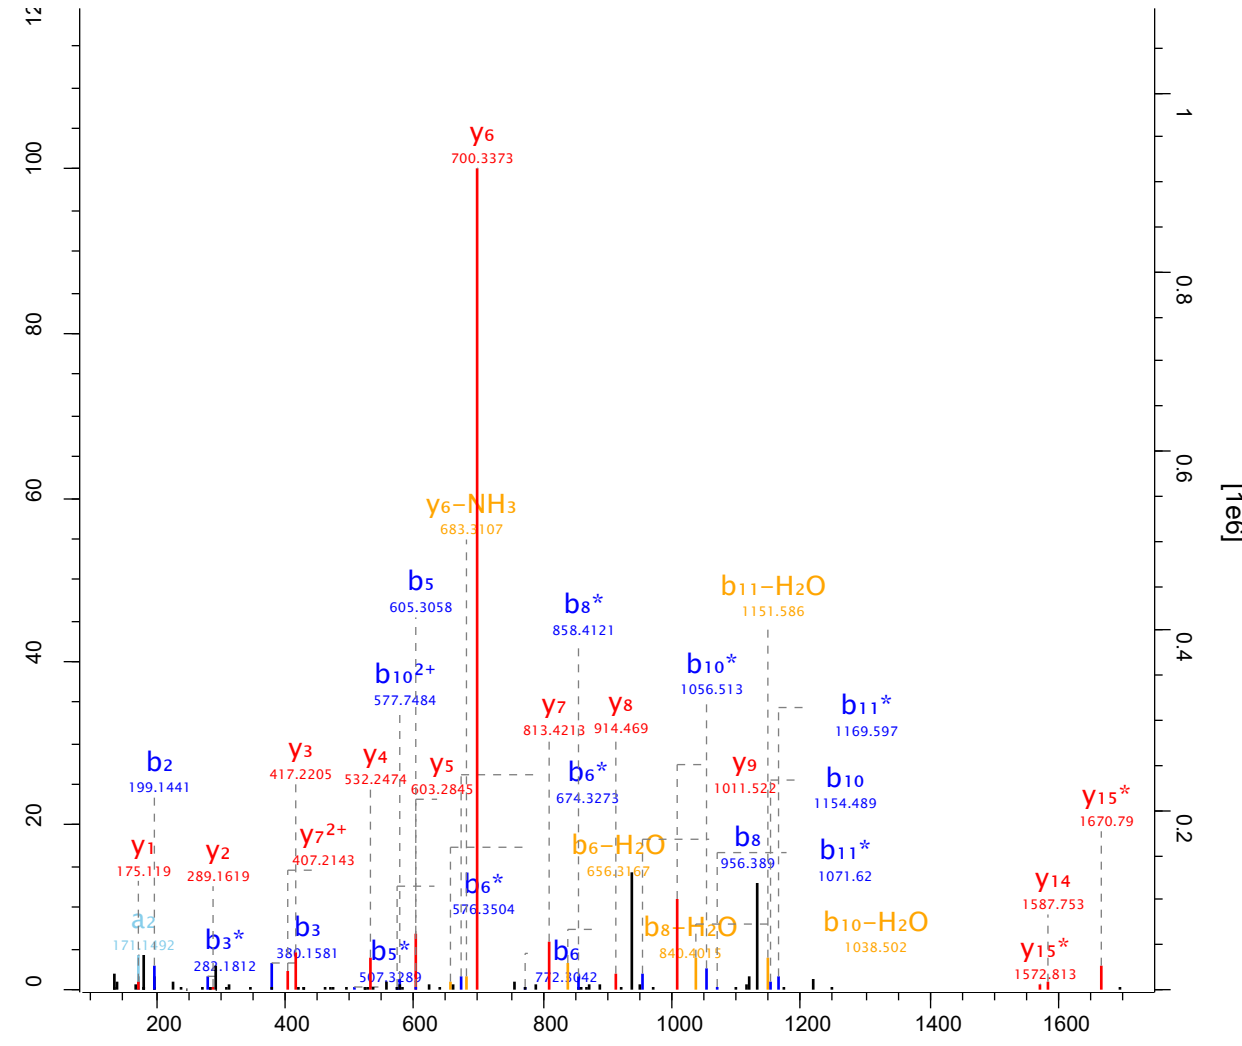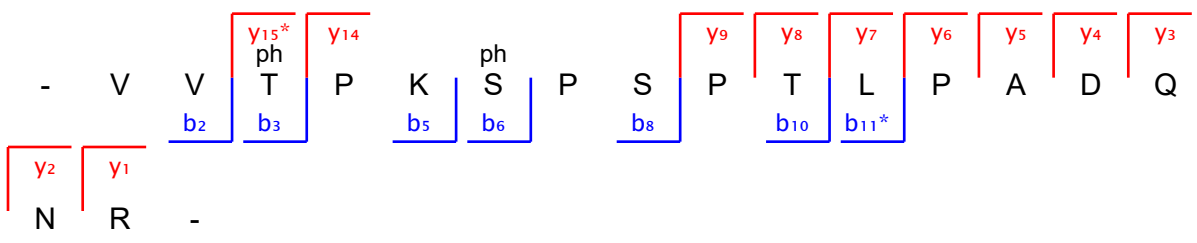

Raw file Scan Method Score m/z  
 sys\_15\_1 16584 FTMS; HCD 92.94 635.28

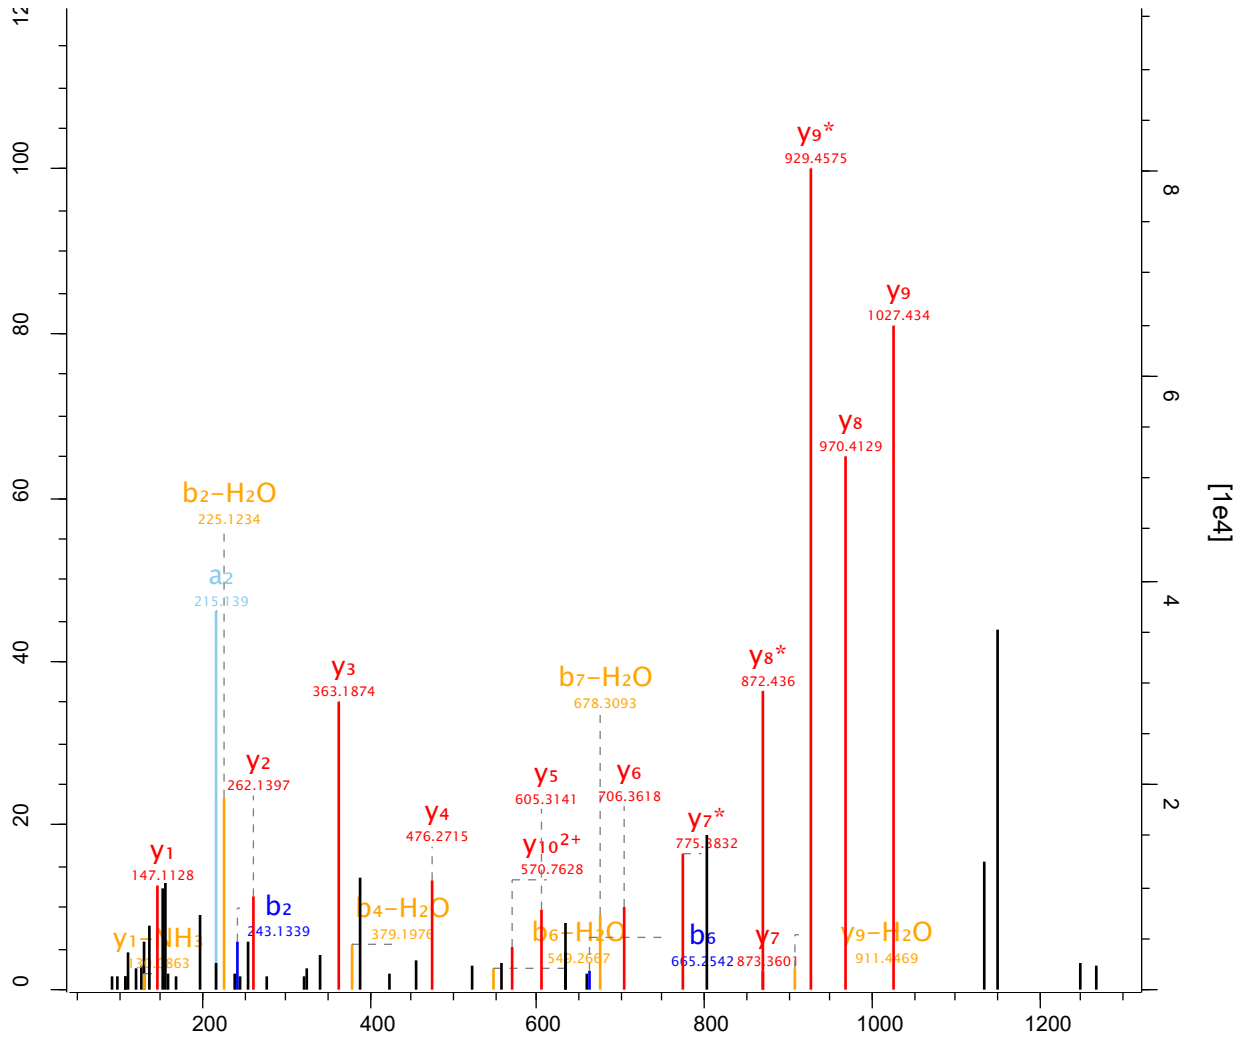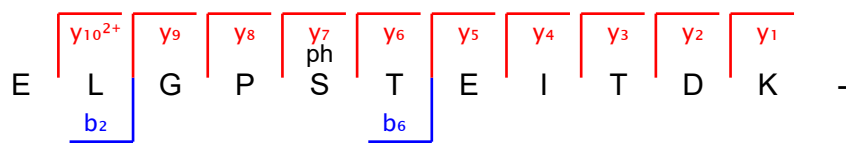

Raw file Scan Method Score m/z  
 sys\_15\_1 16585 FTMS; HCD 42.86 732.67

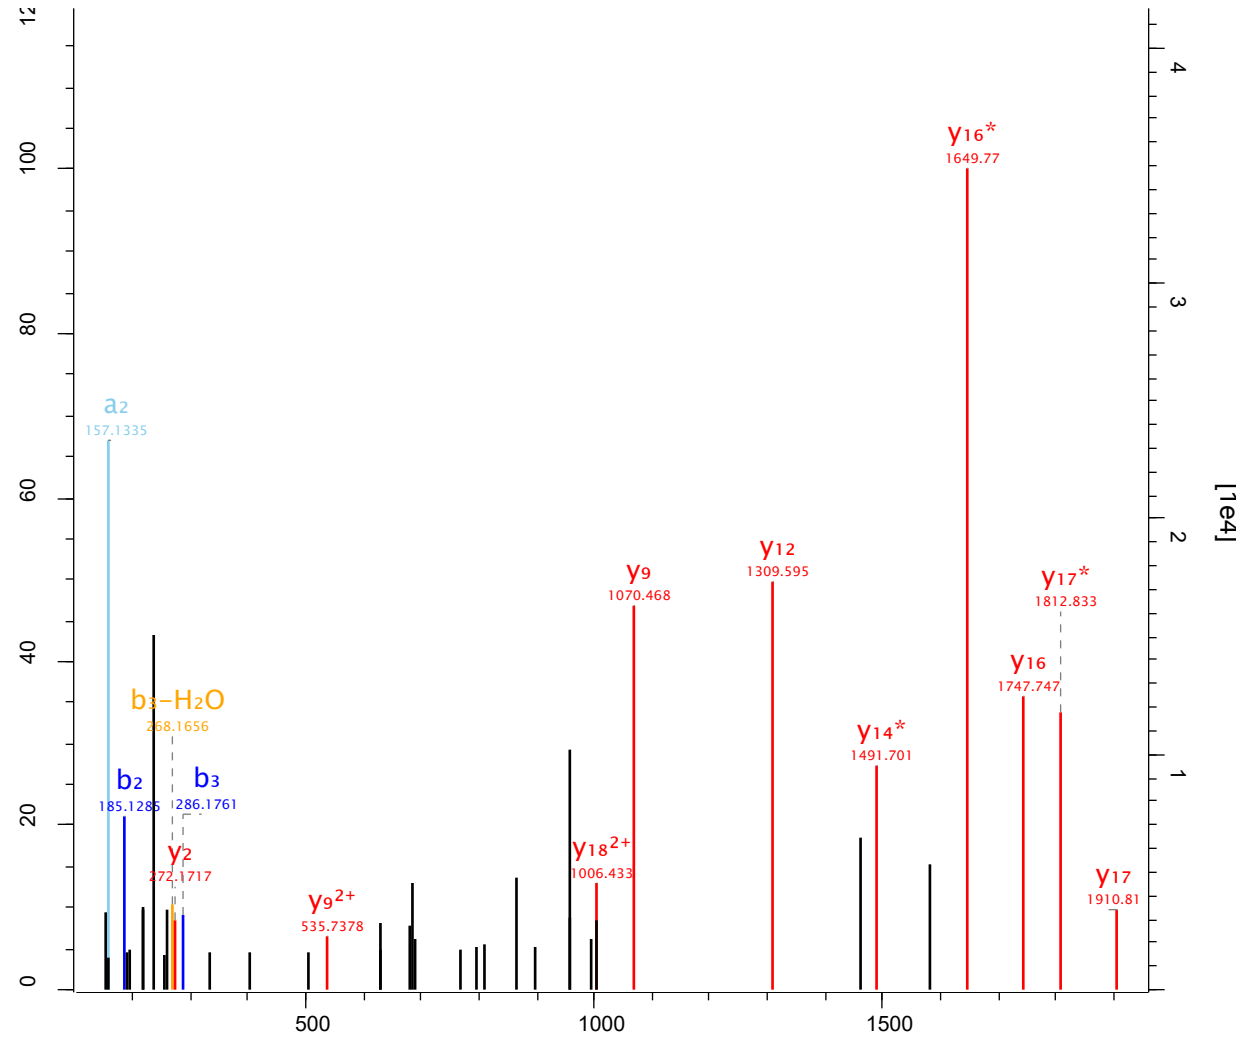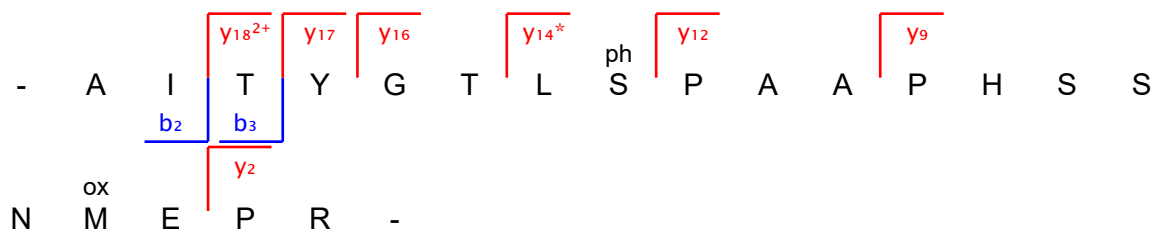

Raw file Scan Method Score m/z  
 sys\_15\_1 16667 FTMS; HCD 107.78 883.87

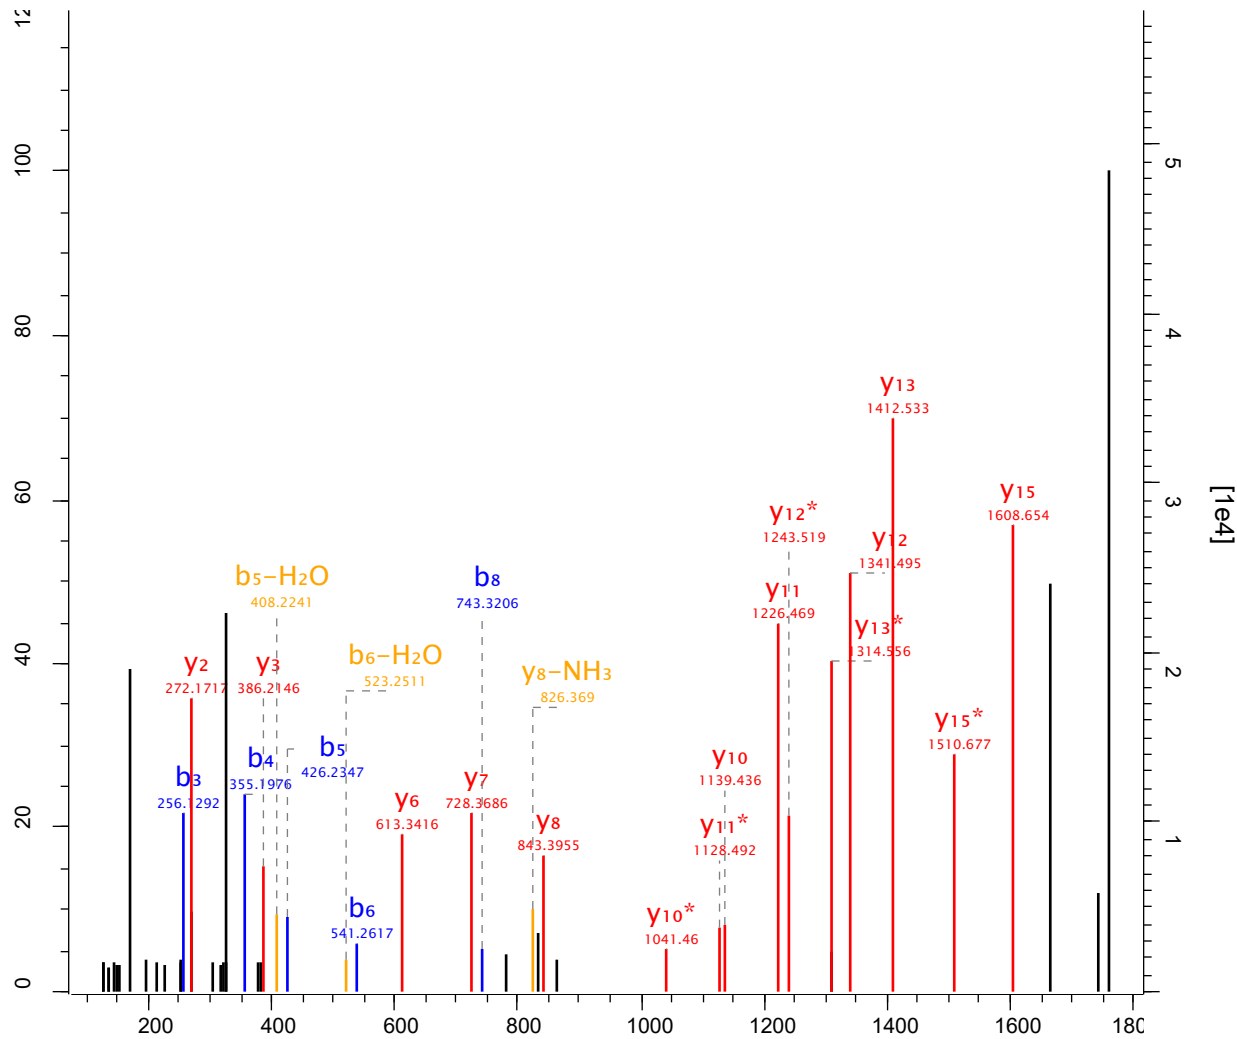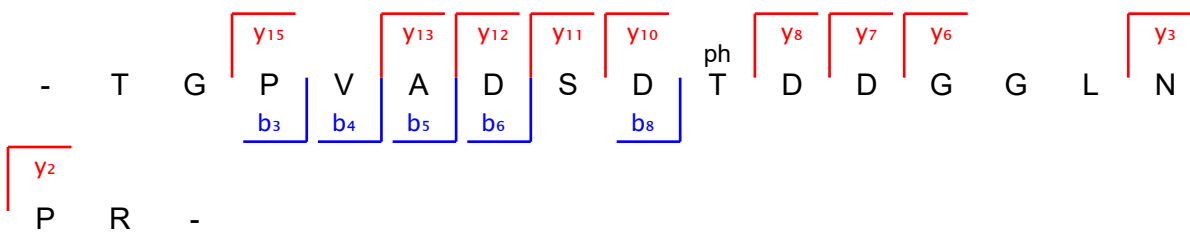

Raw file sys\_15\_1 Scan 16679 Method FTMS; HCD Score 151.96 m/z 841.34

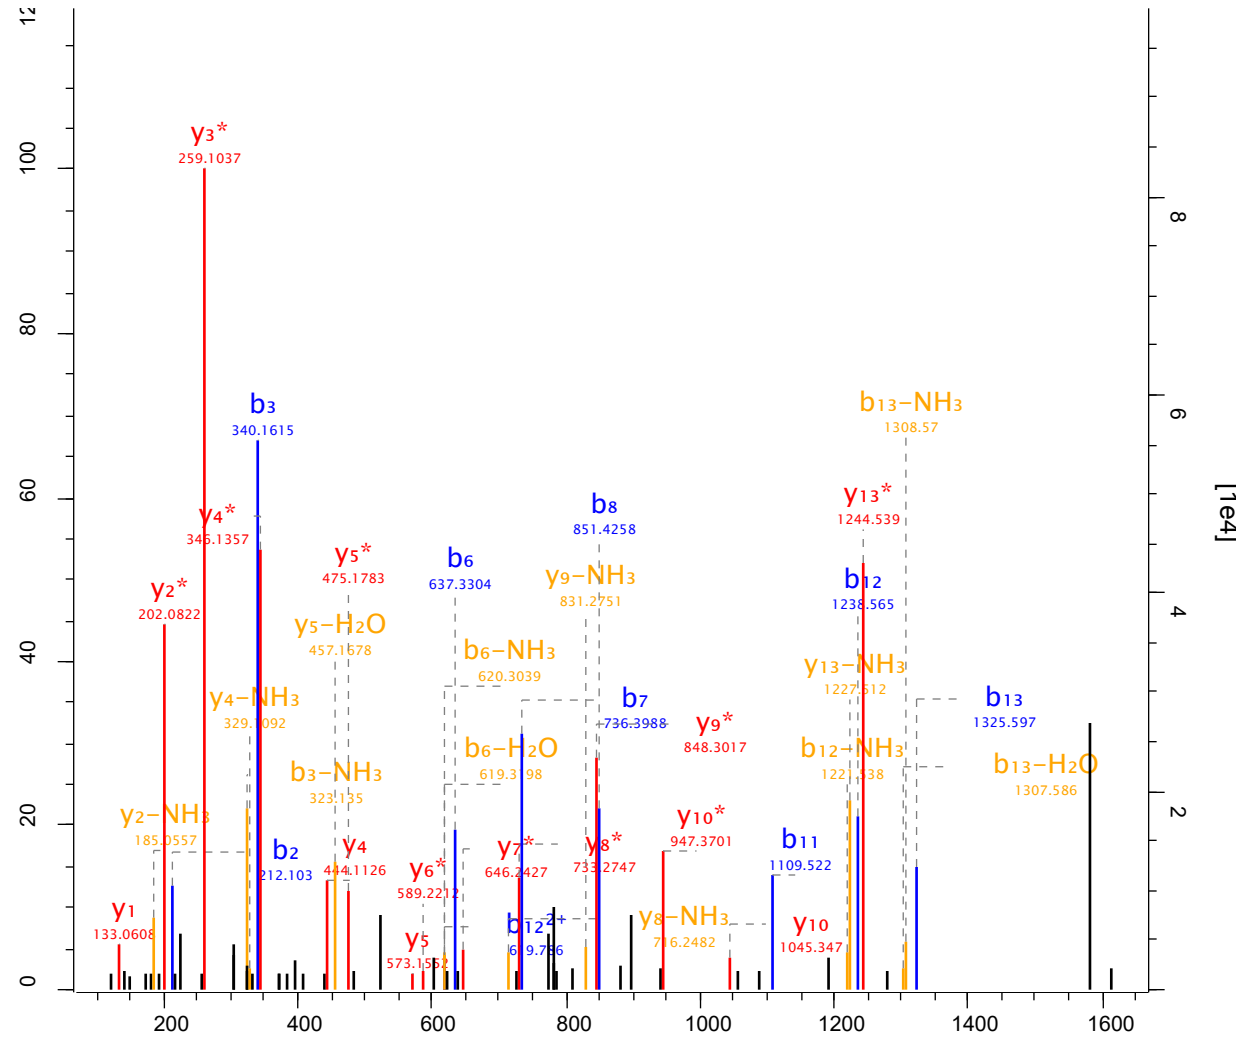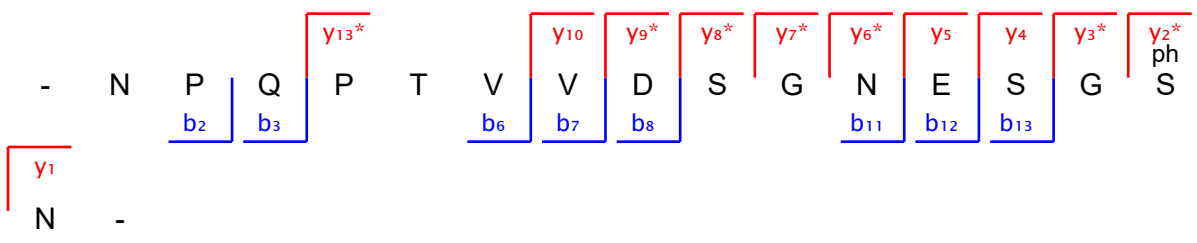



Raw file Scan Method Score m/z  
 sys\_15\_1 16695 FTMS; HCD 45 746.86

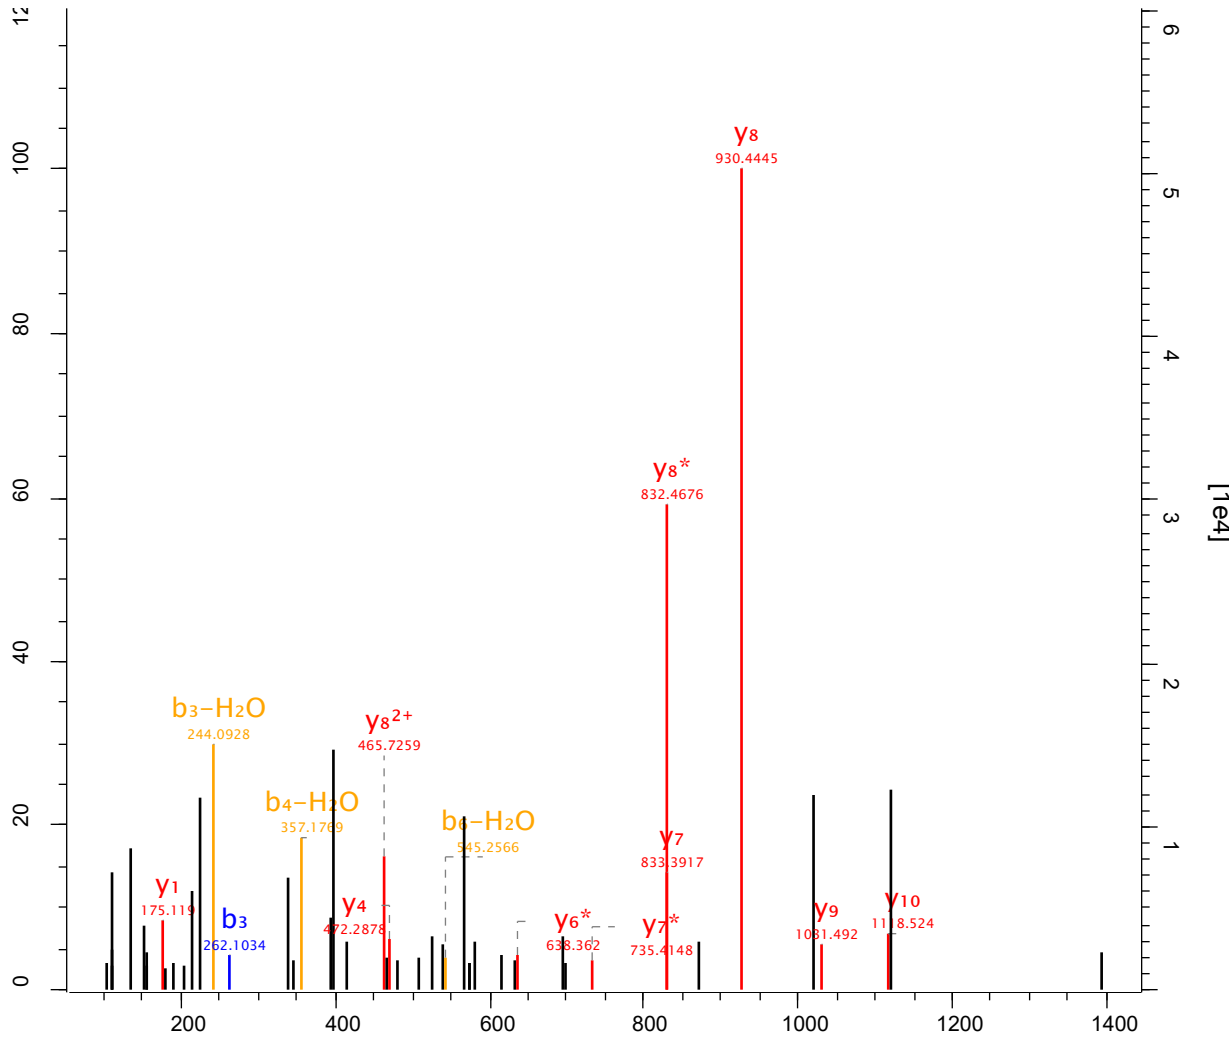

- S S S L S T P P P ph S P L S R -

Annotations: b3 (blue), y1-y10 (red), y8<sup>2+</sup> (dashed red), y8\* (red).

Raw file Scan Method Score m/z  
 sys\_15\_1 16709 FTMS; HCD 117.08 603.27

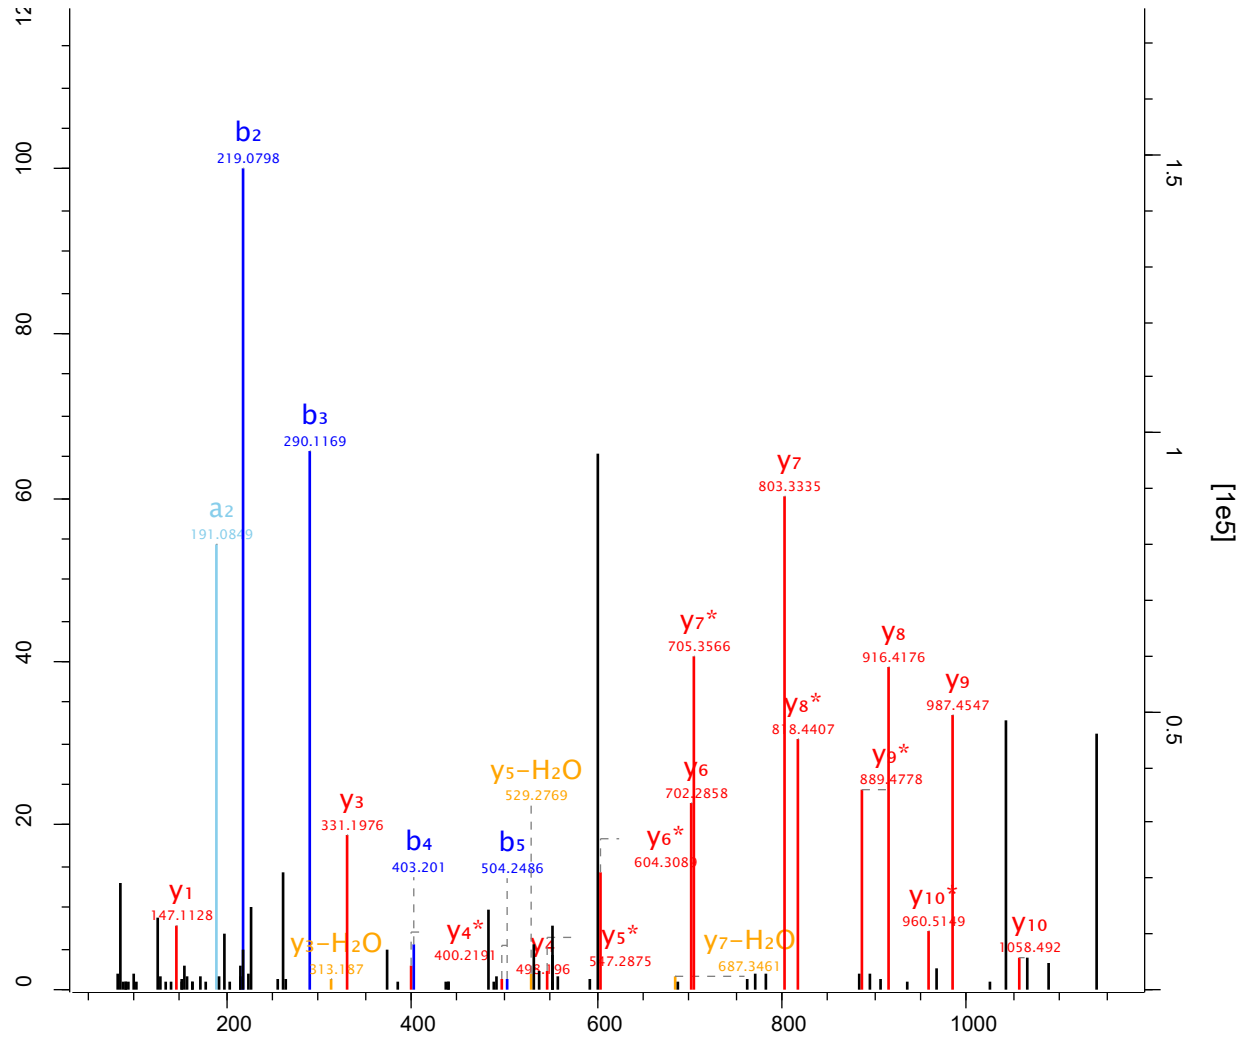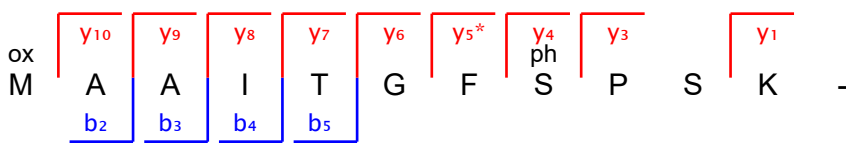

Raw file Scan Method Score m/z  
 sys\_15\_1 16718 FTMS; HCD 46.07 785.31

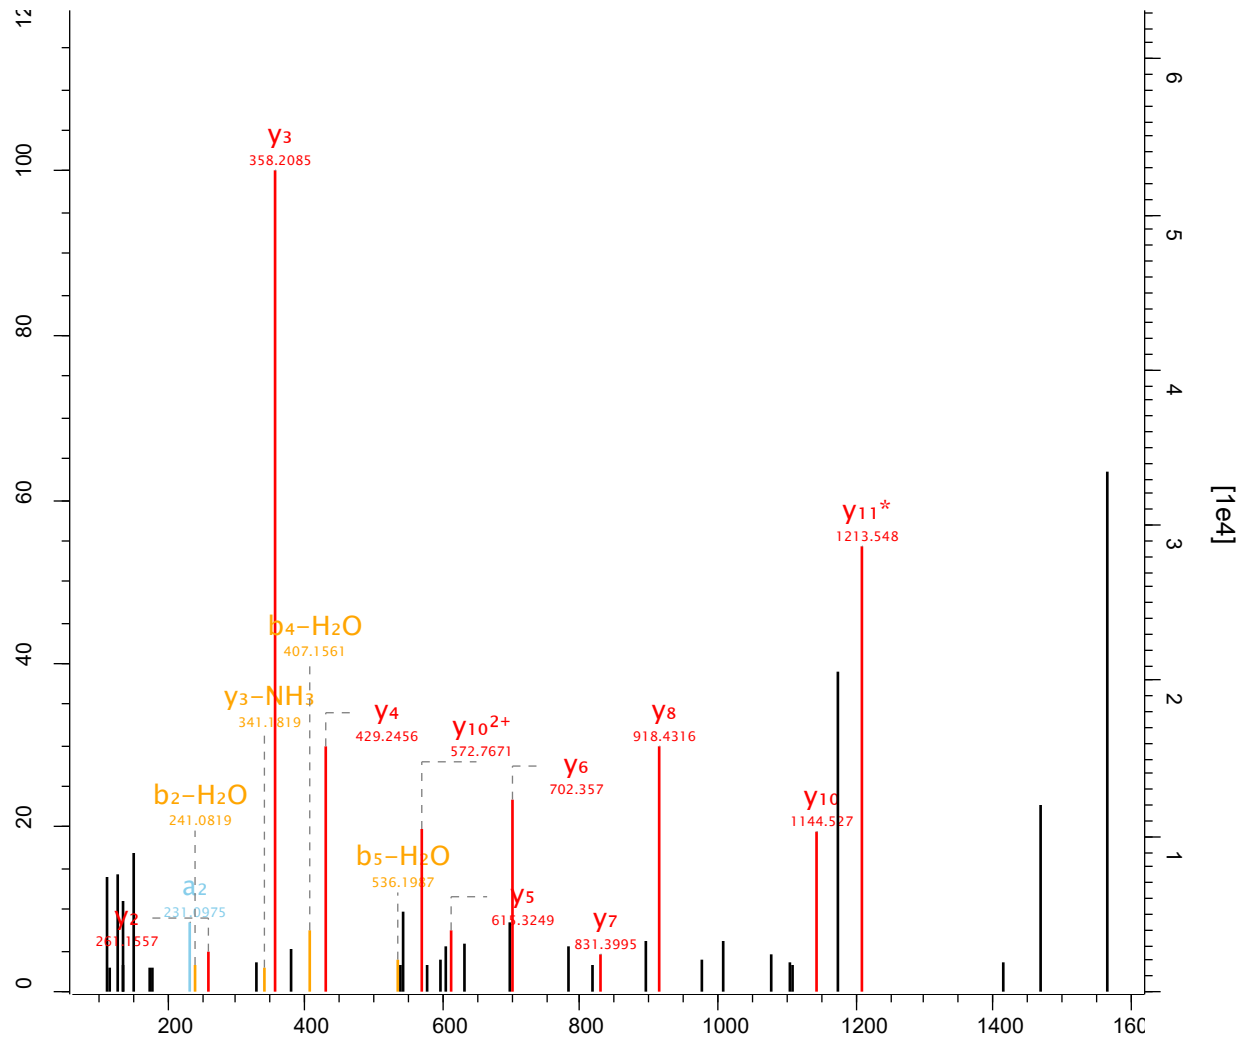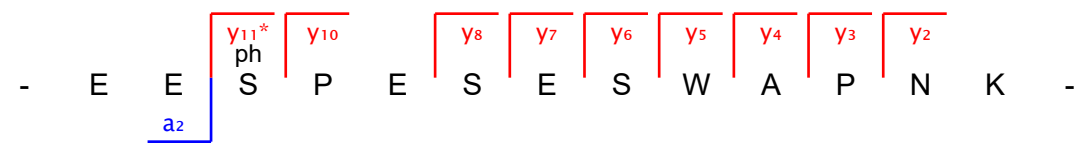

Raw file Scan Method Score m/z  
 sys\_15\_1 16829 FTMS; HCD 107.09 542.23

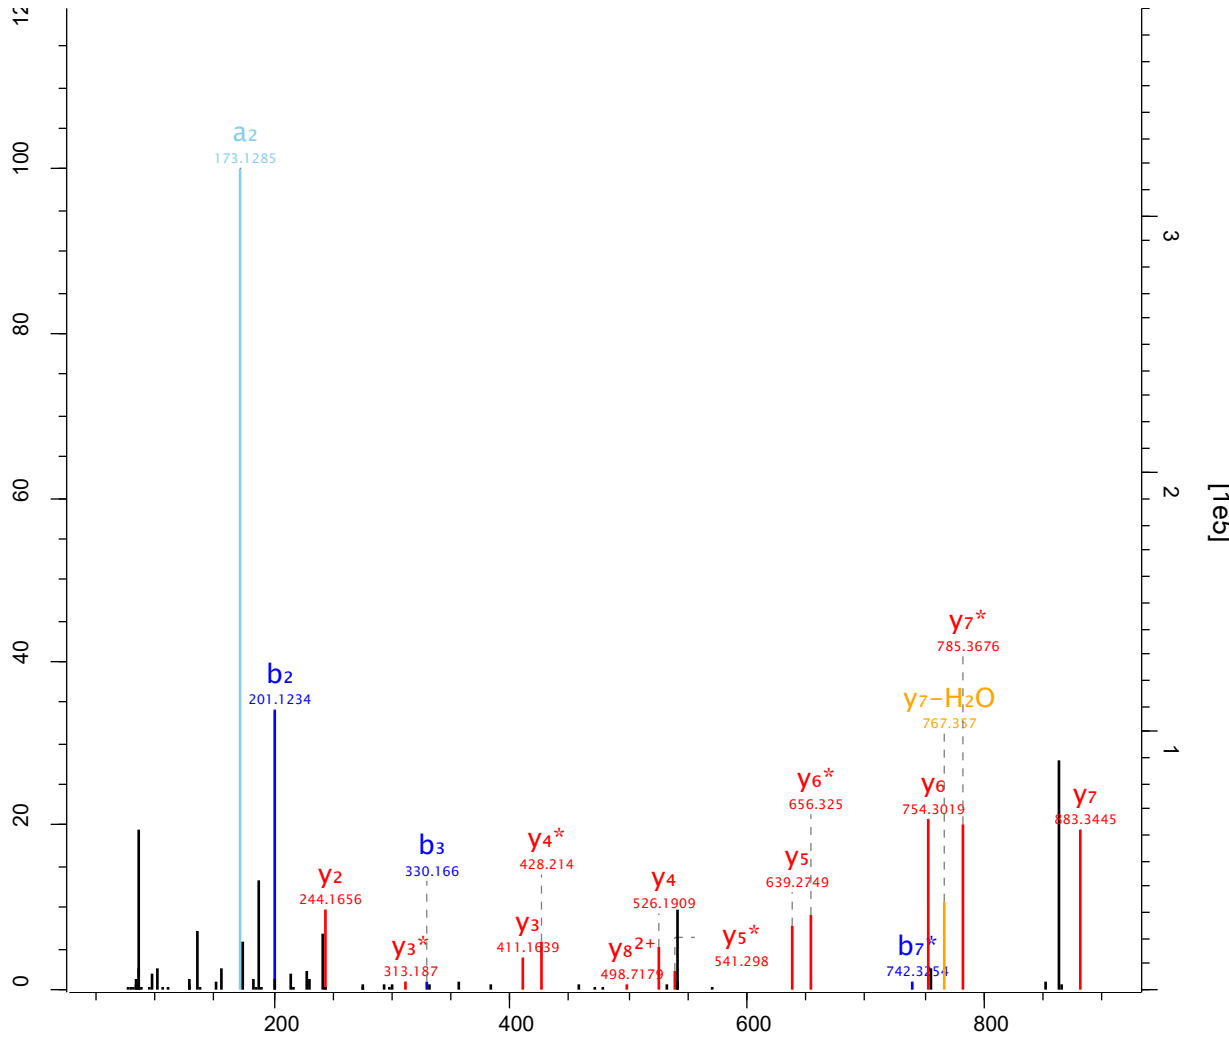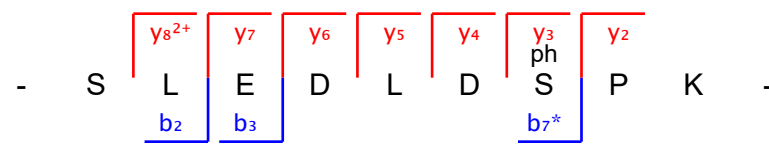

Raw file Scan Method Score m/z  
 sys\_15\_1 16844 FTMS; HCD 44.93 512.25

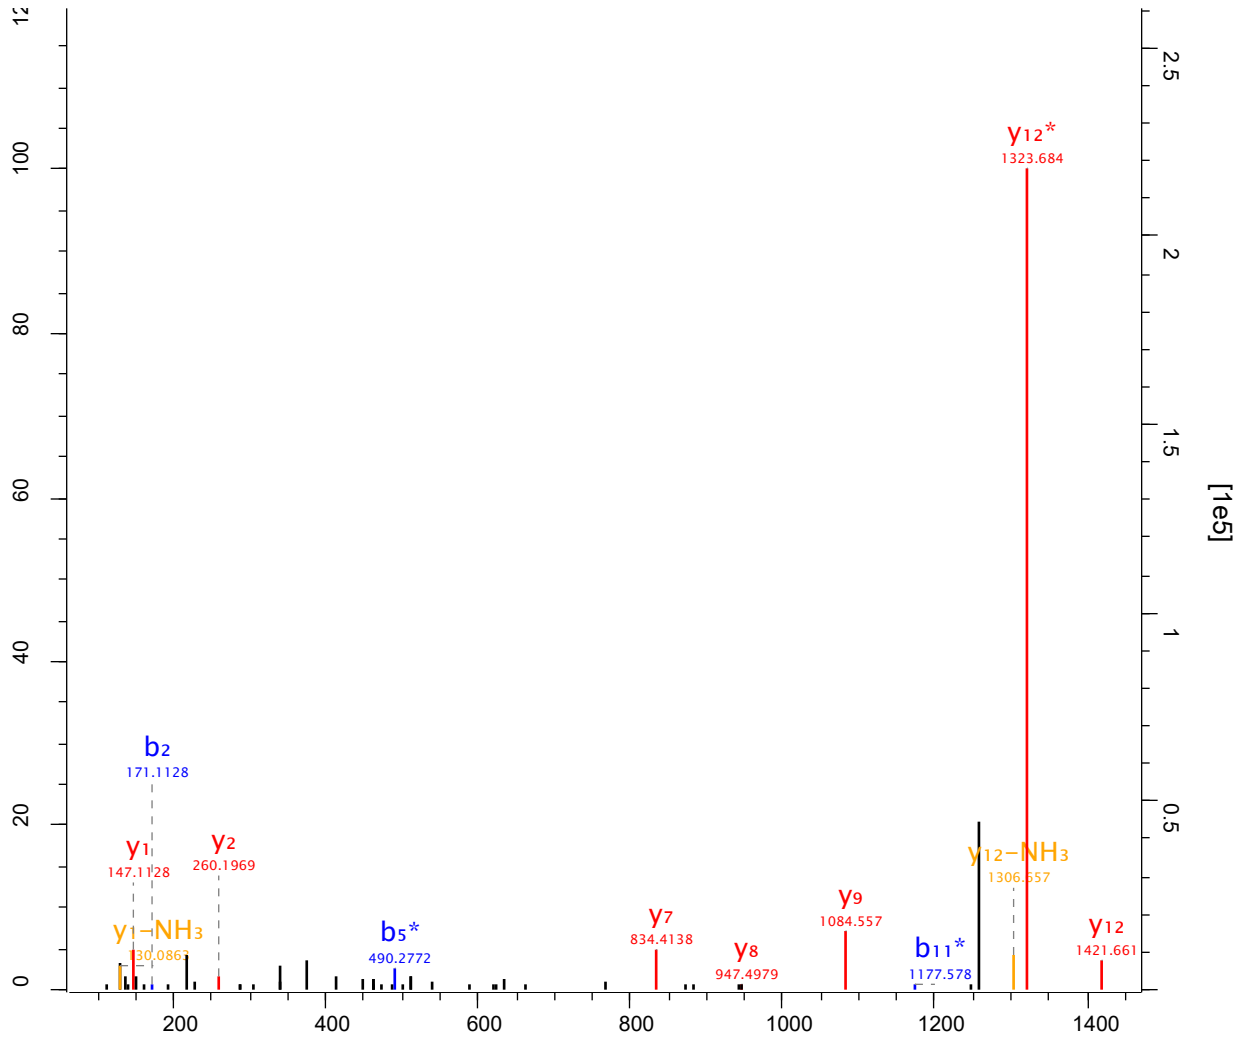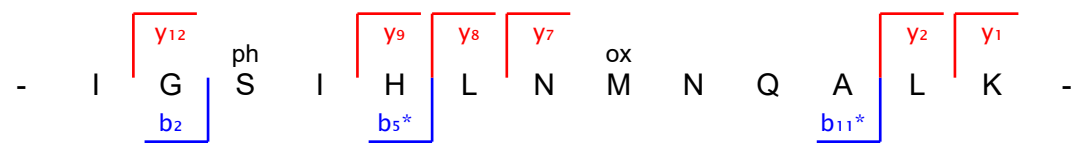

Raw file Scan Method Score m/z  
 sys\_15\_1 1685 FTMS; HCD 91.55 365.18

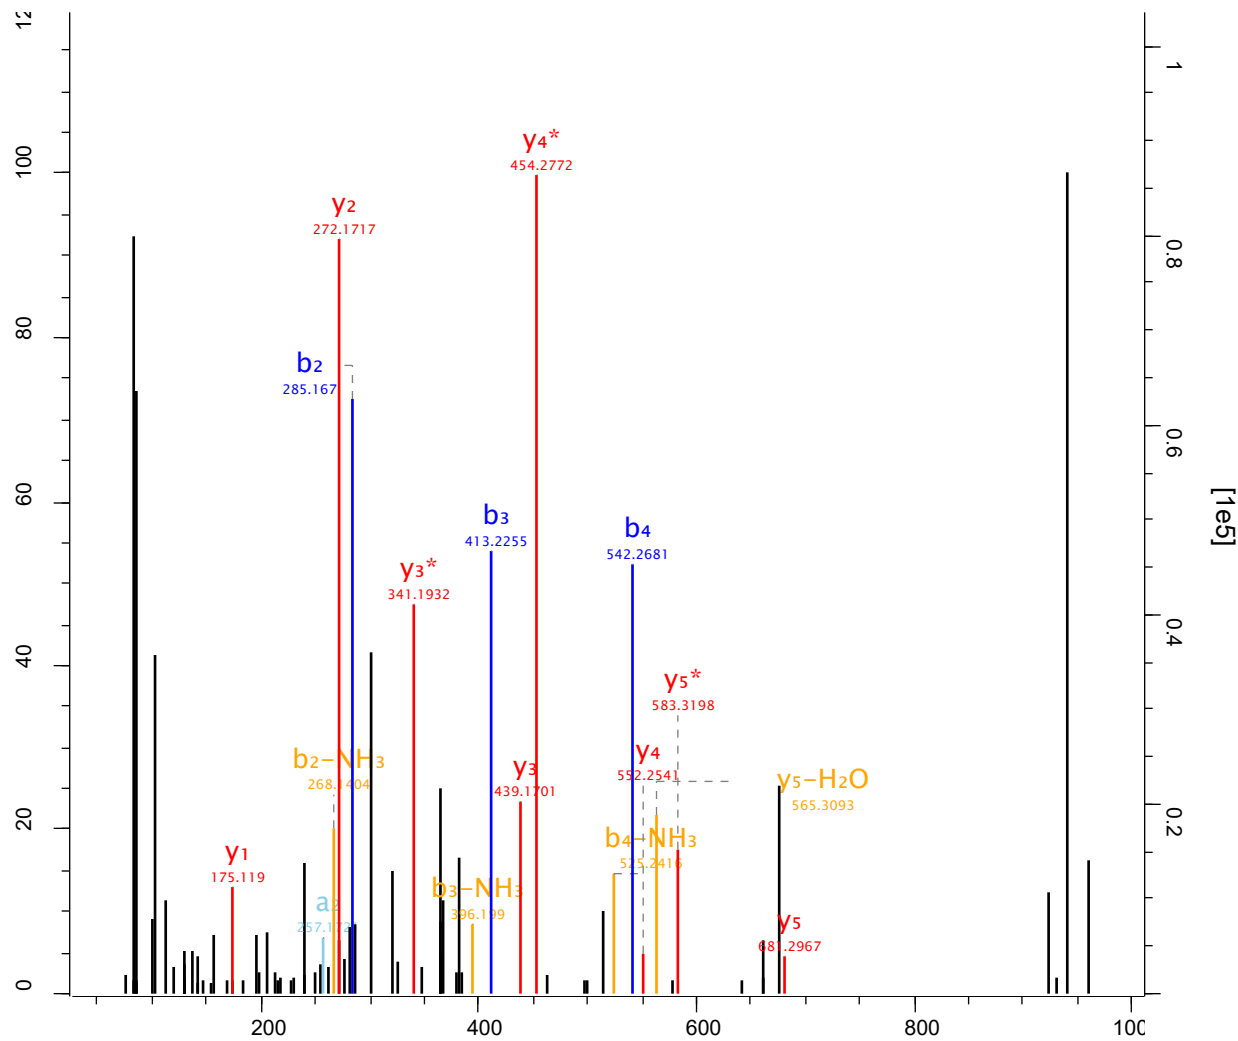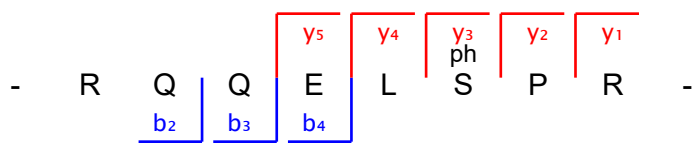

Raw file Scan Method Score m/z  
 sys\_15\_1 16850 FTMS; HCD 44.56 651.81

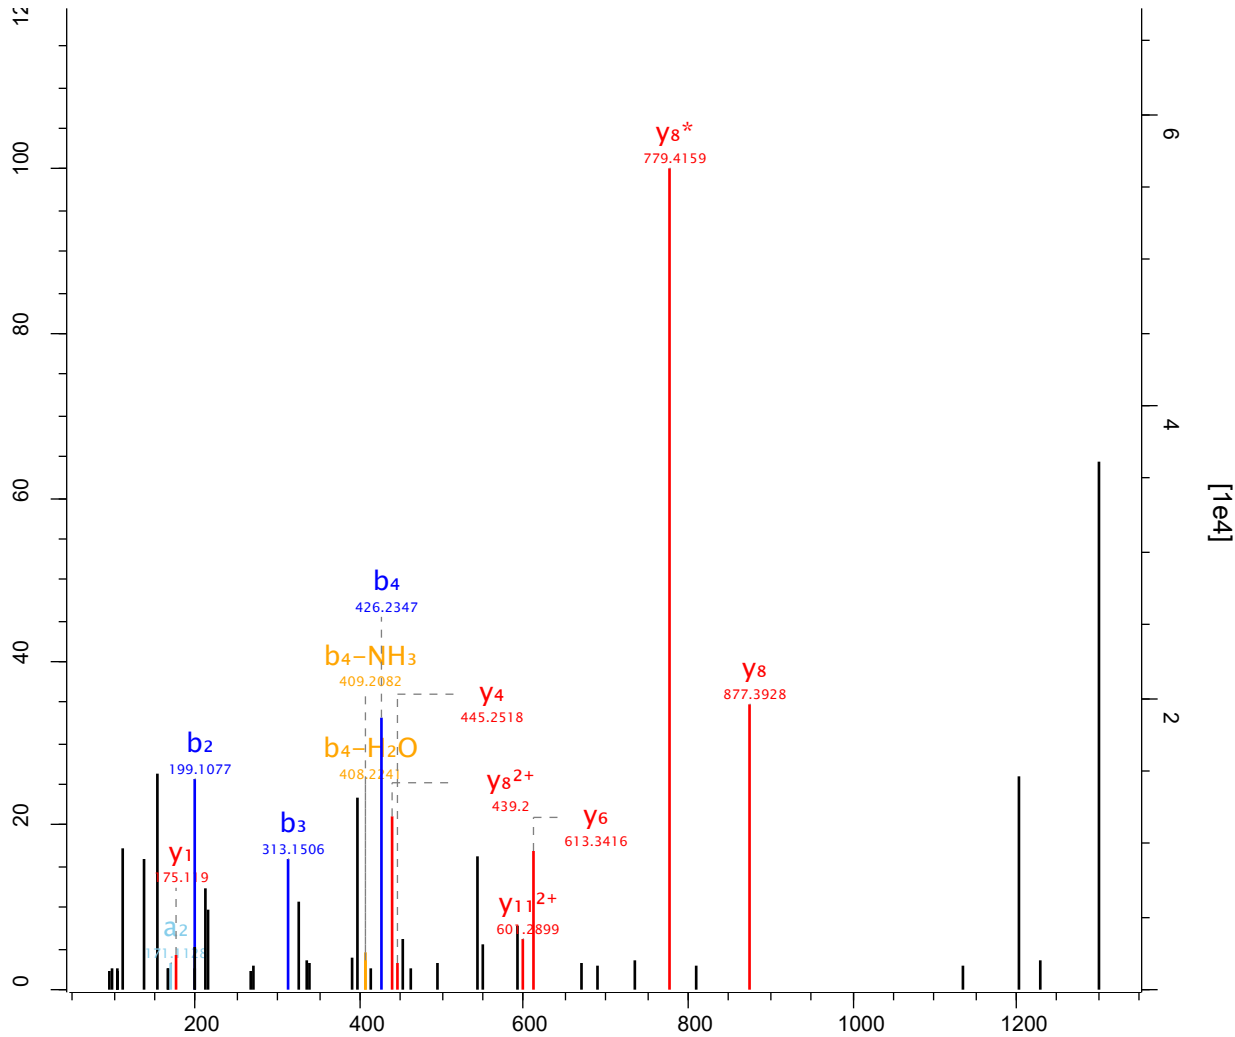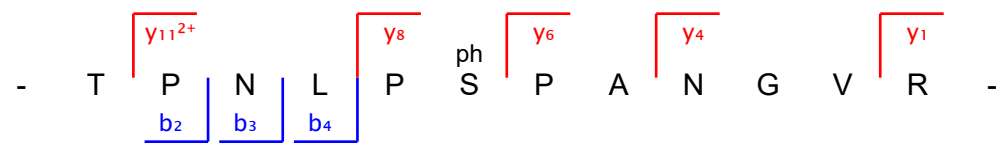

Raw file Scan Method Score m/z  
 sys\_15\_1 16904 FTMS; HCD 162.81 693.32

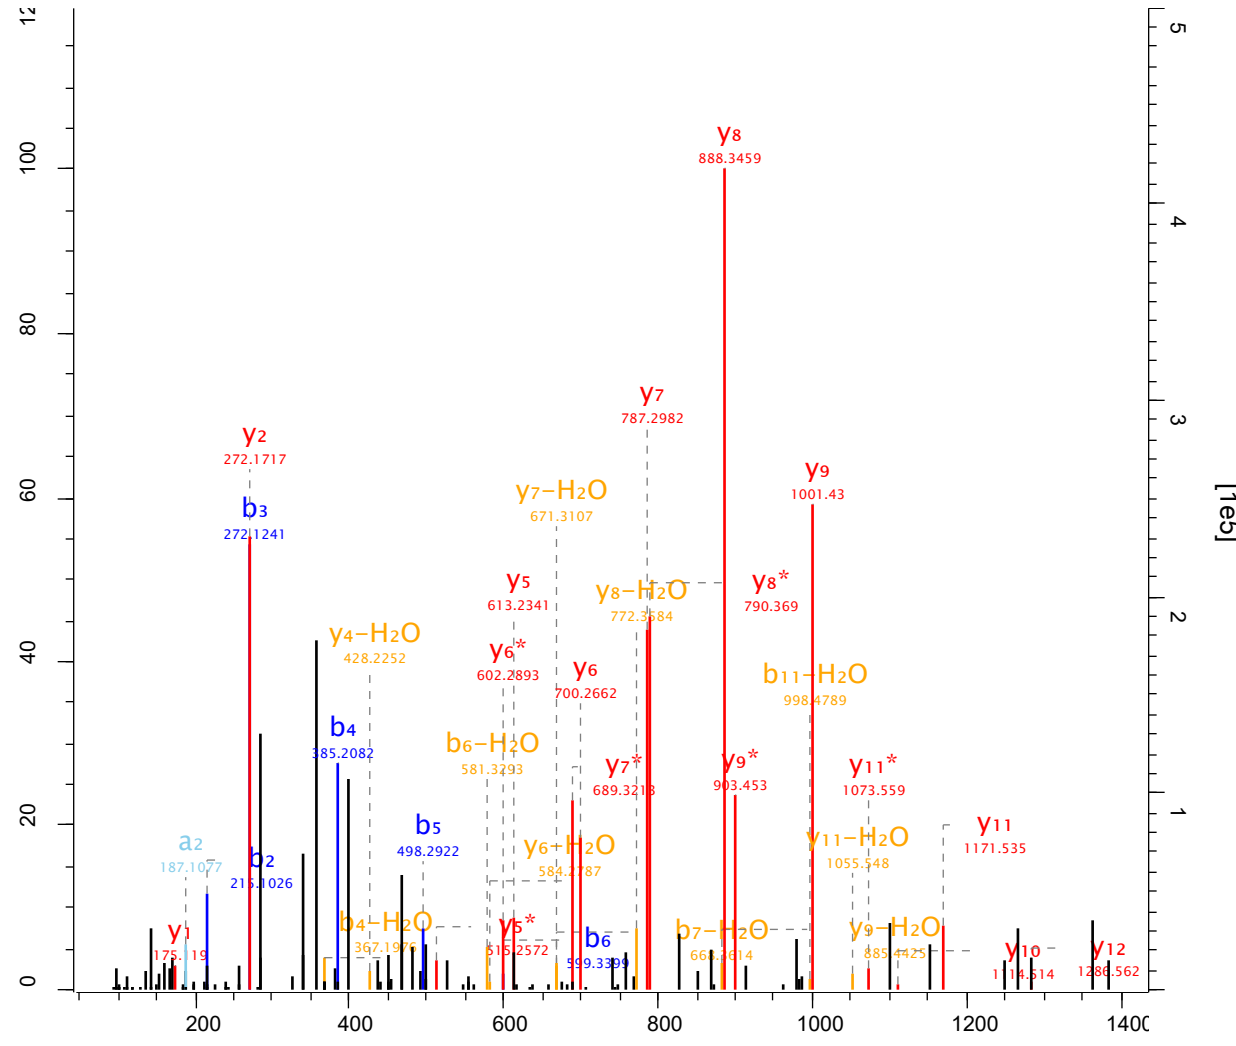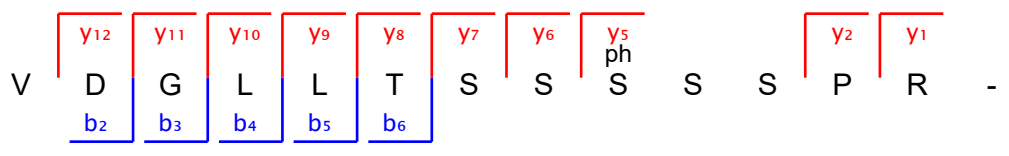



Raw file Scan Method Score m/z  
 sys\_15\_1 17036 FTMS; HCD 234.74 926.71

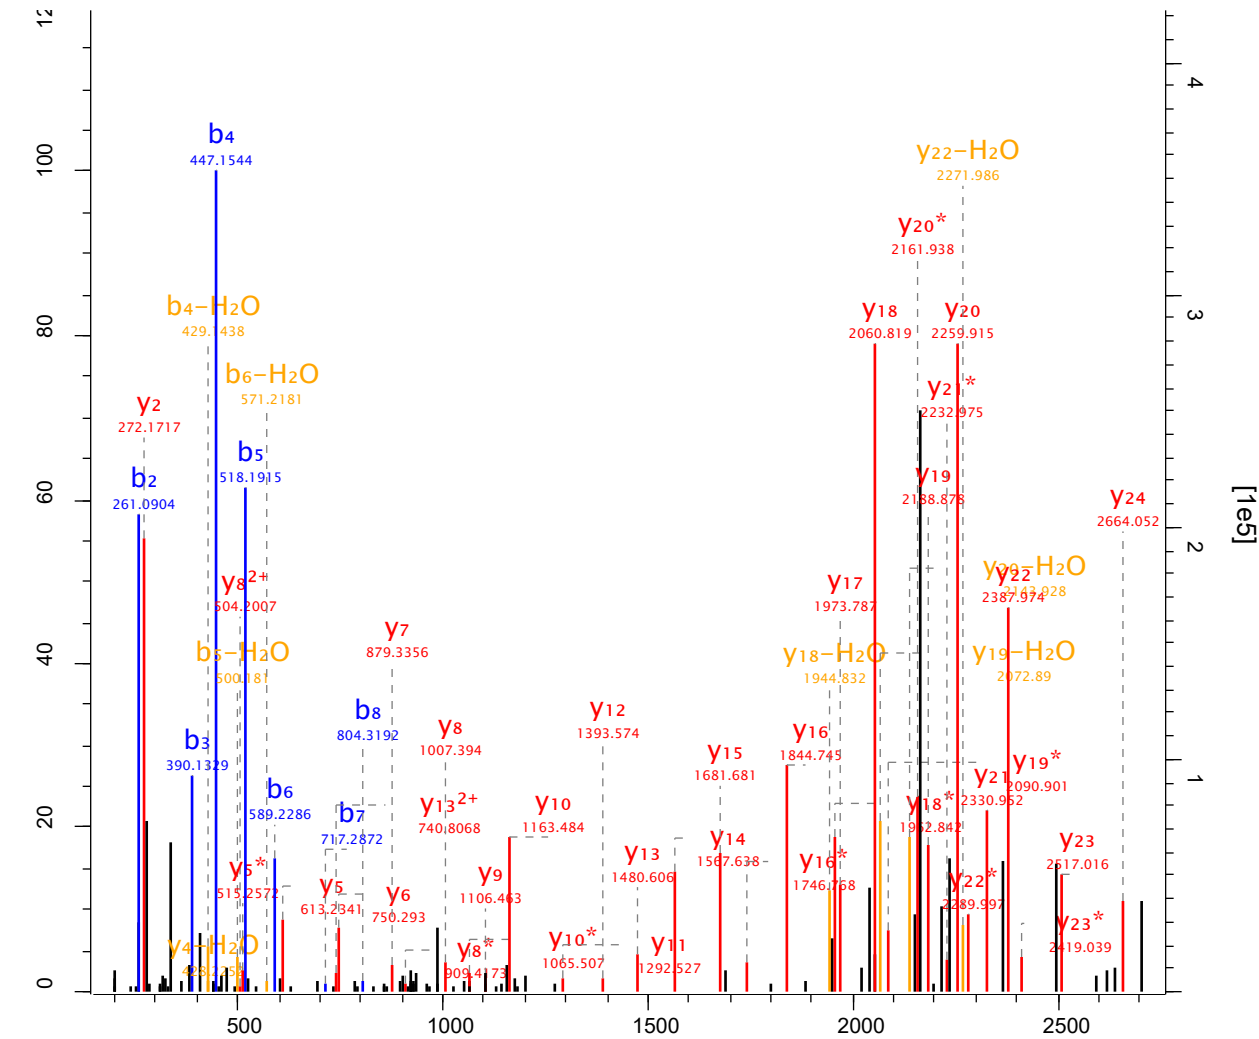

ac  
 - A M E G A A Q S E Y N S S T E  
 b2 b3 b4 b5 b6 b7 b8  
 y10 y9 y8 y7 y6 y5 ph y2  
 G V Q E H S S S P R -

Raw file Scan Method Score m/z  
 sys\_15\_1 17048 FTMS; HCD 135.14 689.8

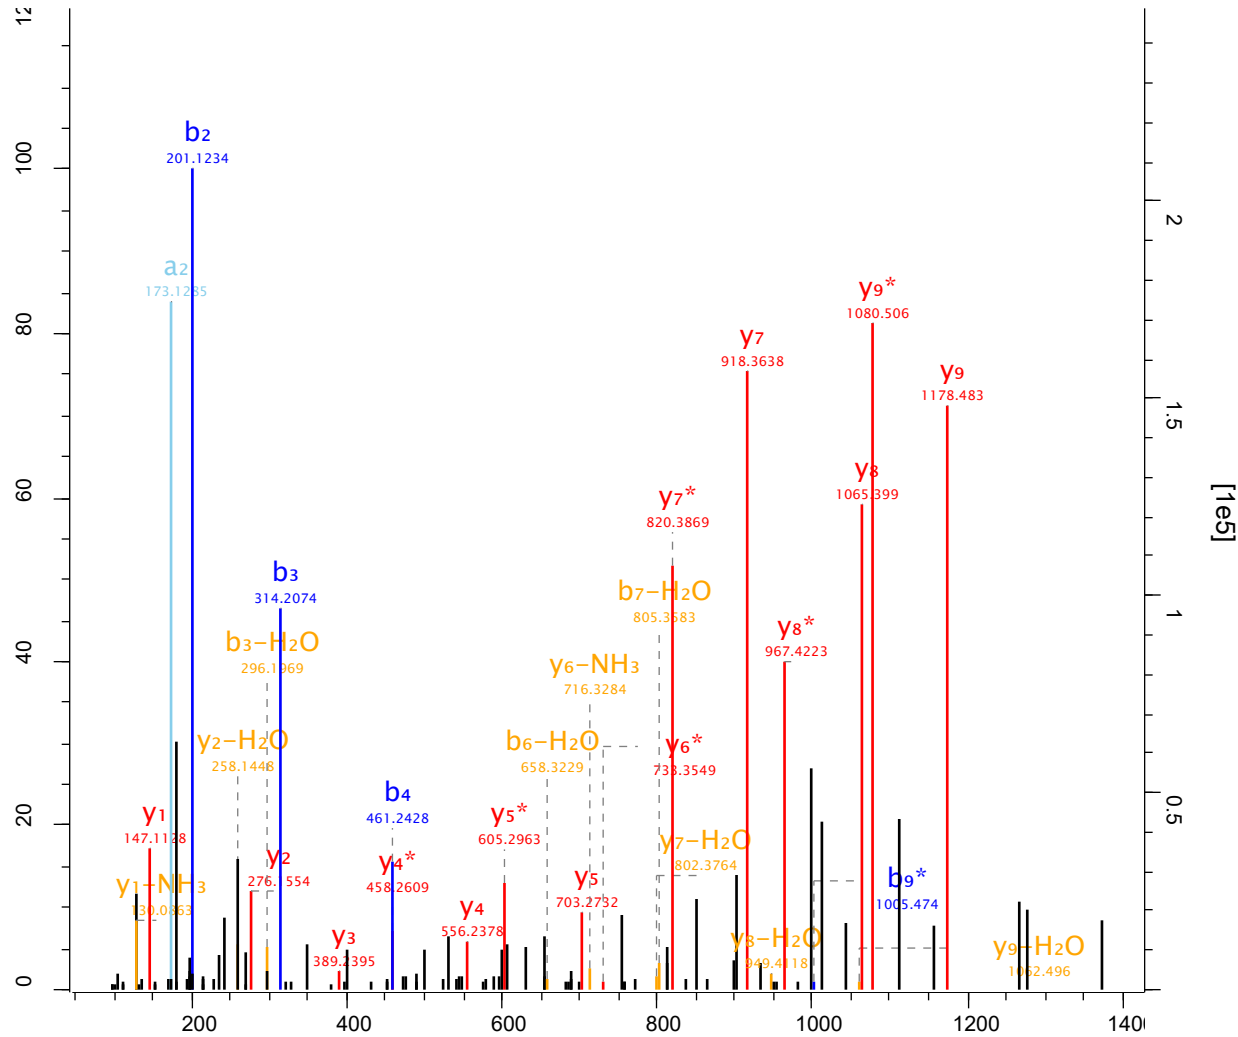

- S L L L M S Q M S L E K -

b<sub>2</sub>
b<sub>3</sub>
b<sub>4</sub>
y<sub>9</sub>
y<sub>8</sub>  
ox
y<sub>7</sub>
y<sub>6</sub><sup>\*</sup>
y<sub>5</sub>  
ox
y<sub>4</sub>  
ph
y<sub>3</sub>
y<sub>2</sub>
y<sub>1</sub>
b<sub>9</sub><sup>\*</sup>

Raw file Scan Method Score m/z  
 sys\_15\_1 17081 FTMS; HCD 89.23 642.8

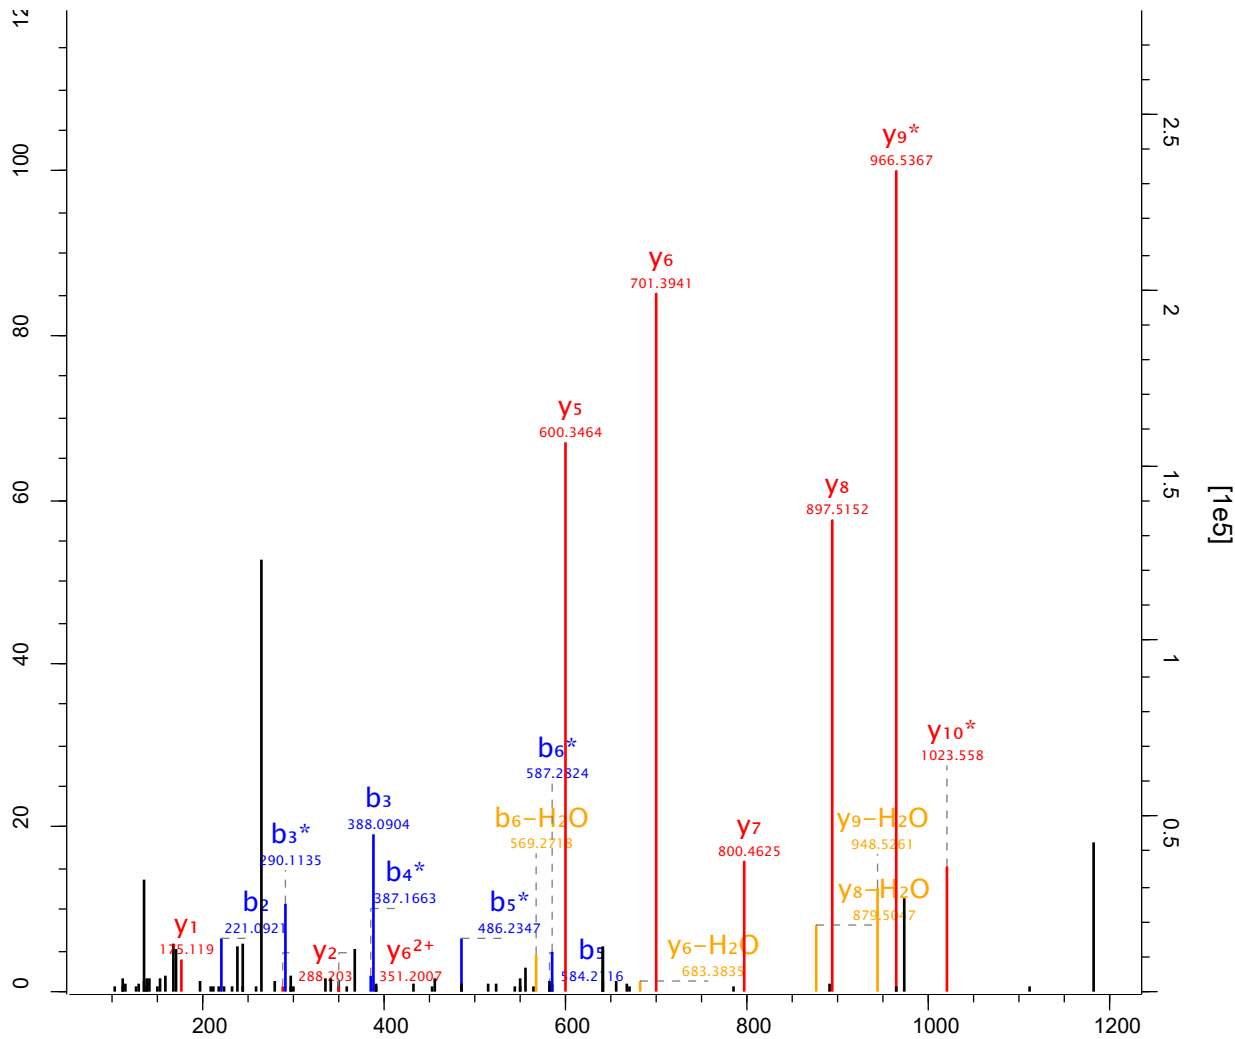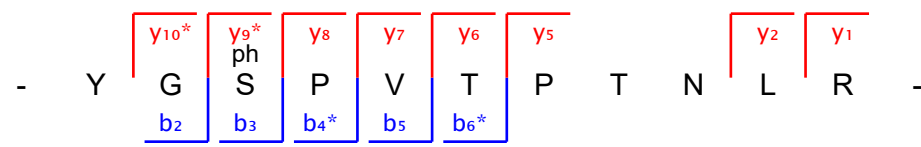

Raw file Scan Method Score m/z  
 sys\_15\_1 17228 FTMS; HCD 43.84 979.92

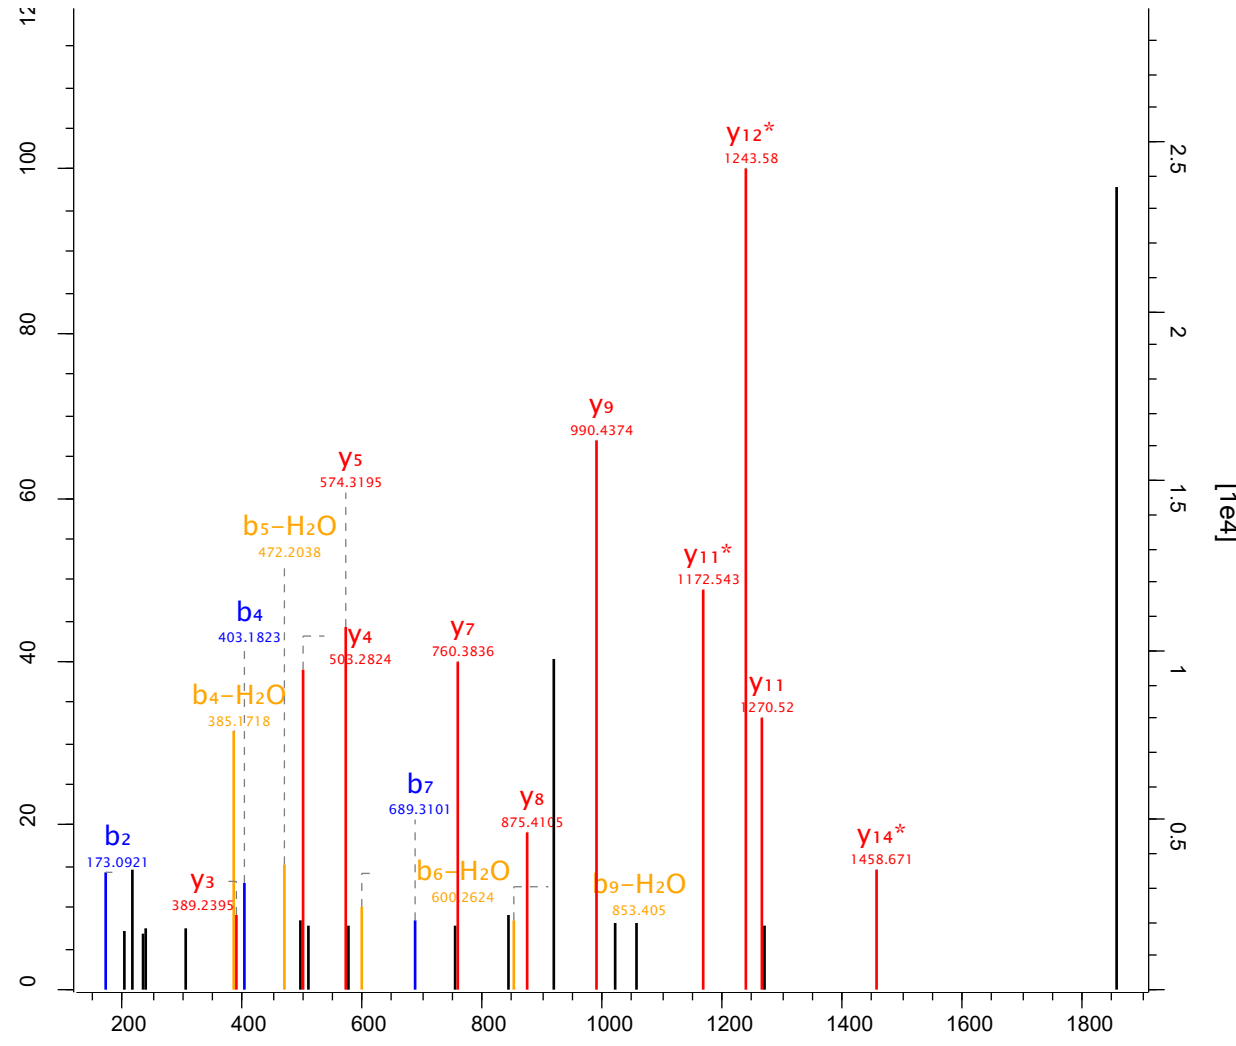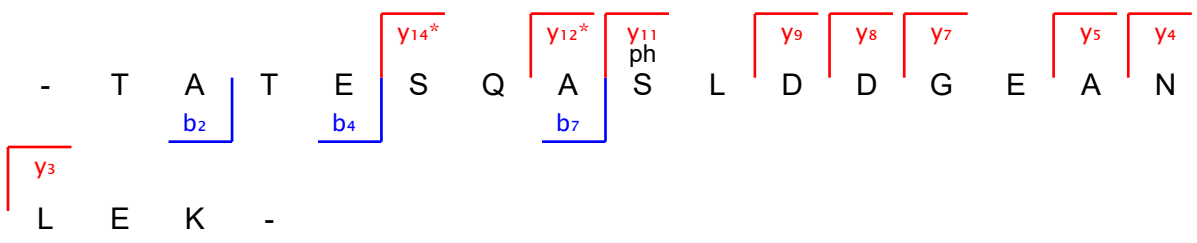

Raw file Scan Method Score m/z  
 sys\_15\_1 17289 FTMS; HCD 100.97 839.84

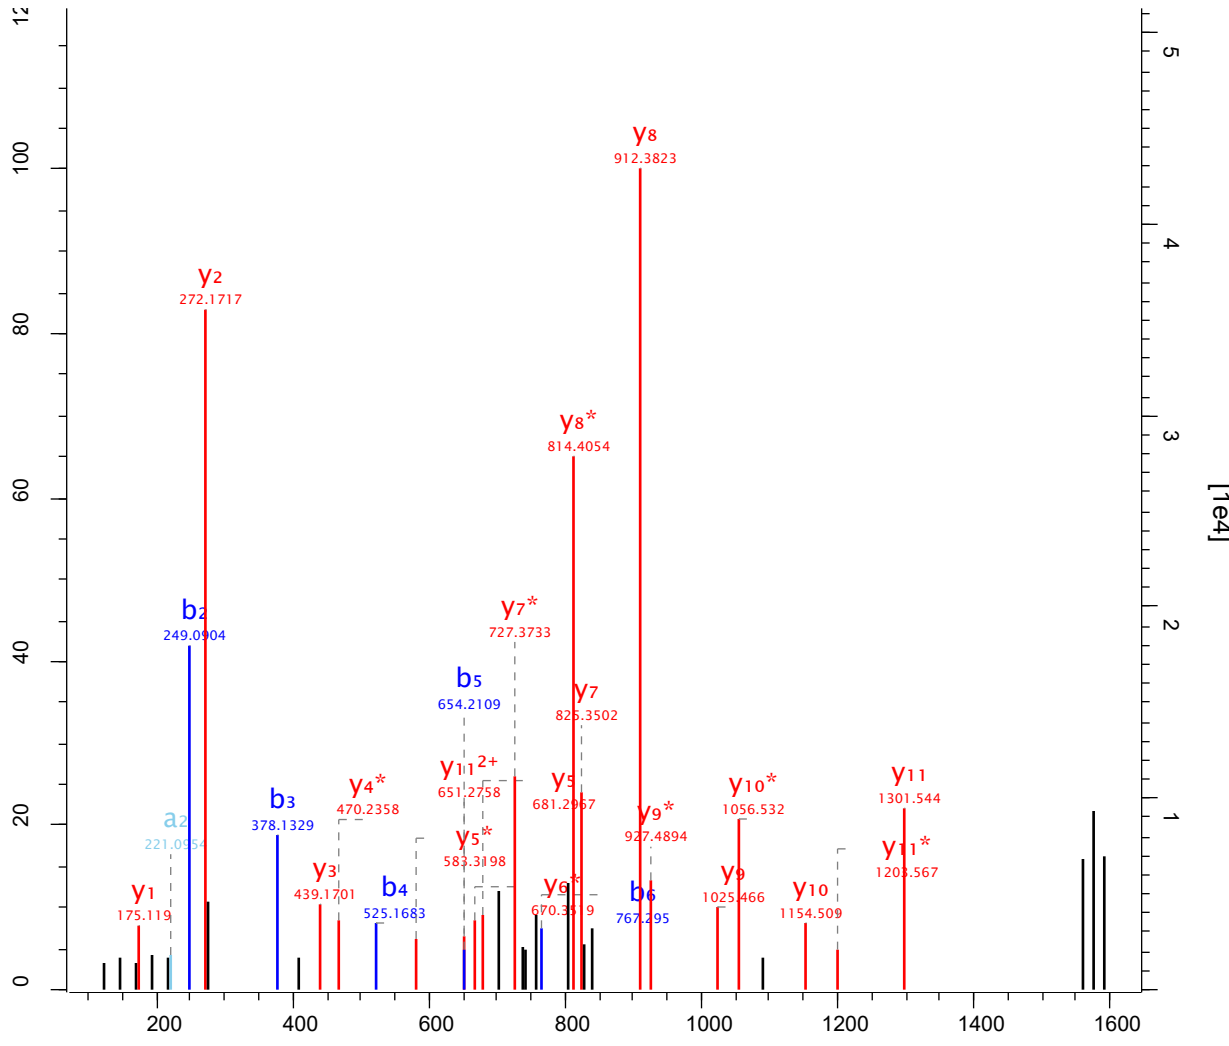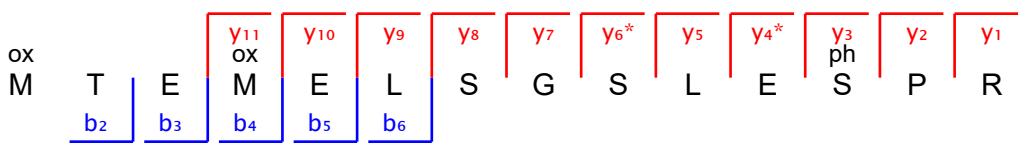

Raw file Scan Method Score m/z  
 sys\_15\_1 17319 FTMS; HCD 178.15 1046.91

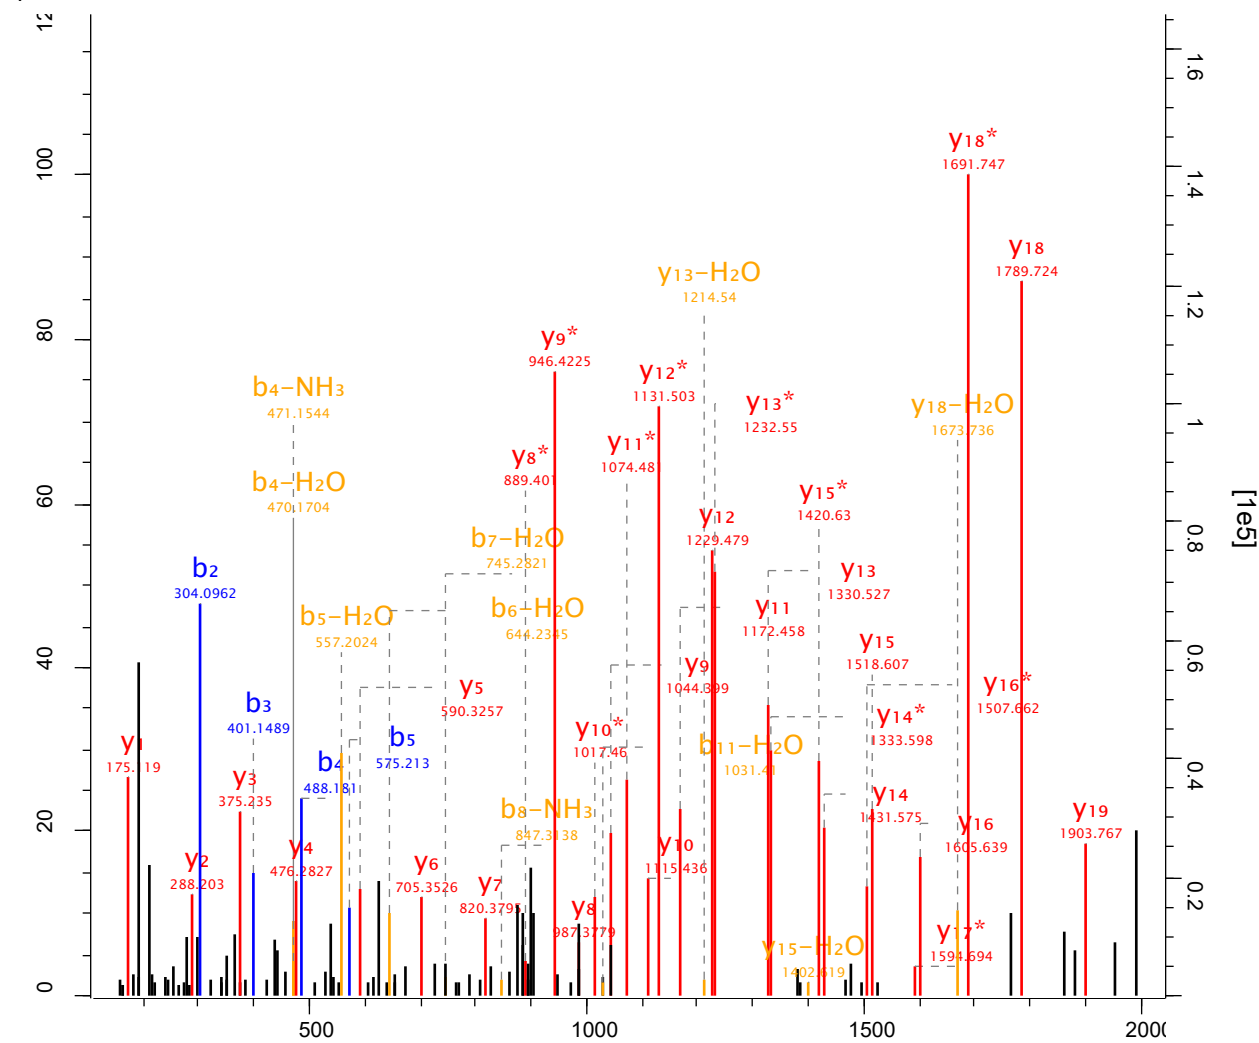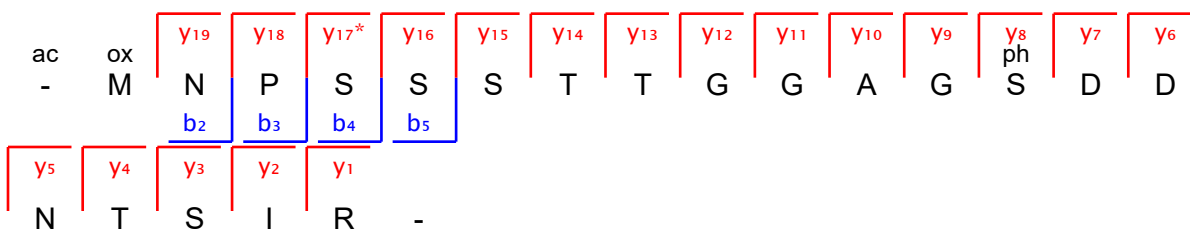

Raw file Scan Method Score m/z  
 sys\_15\_1 17338 FTMS; HCD 195.92 872.35

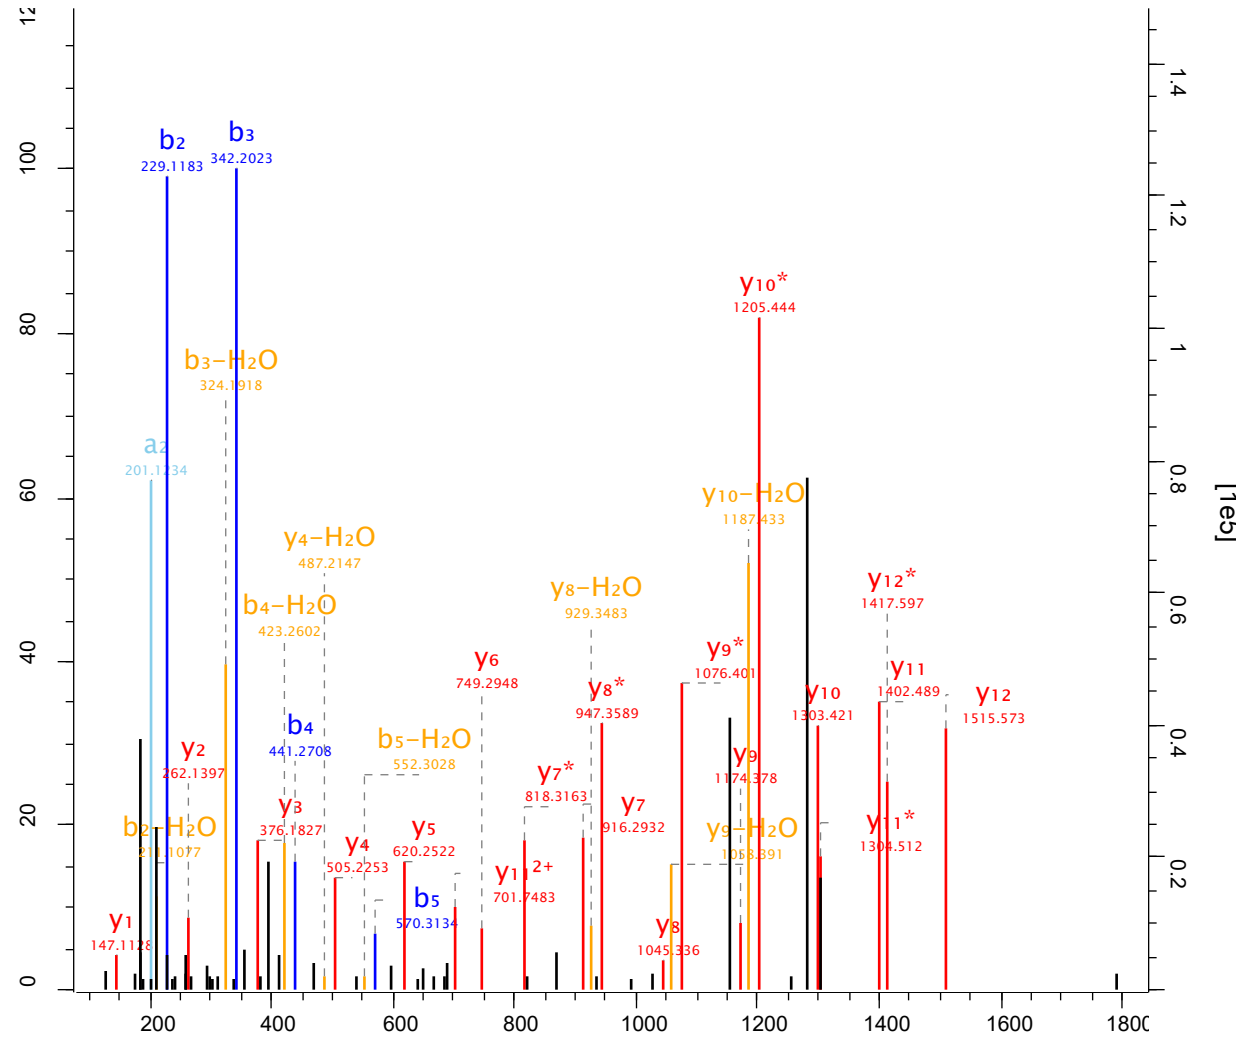

- E V L V E E E S E D E N D K -

b<sub>2</sub>
b<sub>3</sub>
b<sub>4</sub>
b<sub>5</sub>
y<sub>12</sub>
y<sub>11</sub>
y<sub>10</sub>
y<sub>9</sub>
y<sub>8</sub>
y<sub>7</sub>  
ph
y<sub>6</sub>
y<sub>5</sub>
y<sub>4</sub>
y<sub>3</sub>
y<sub>2</sub>
y<sub>1</sub>

Raw file Scan Method Score m/z  
 sys\_15\_1 17496 FTMS; HCD 172.13 576.26

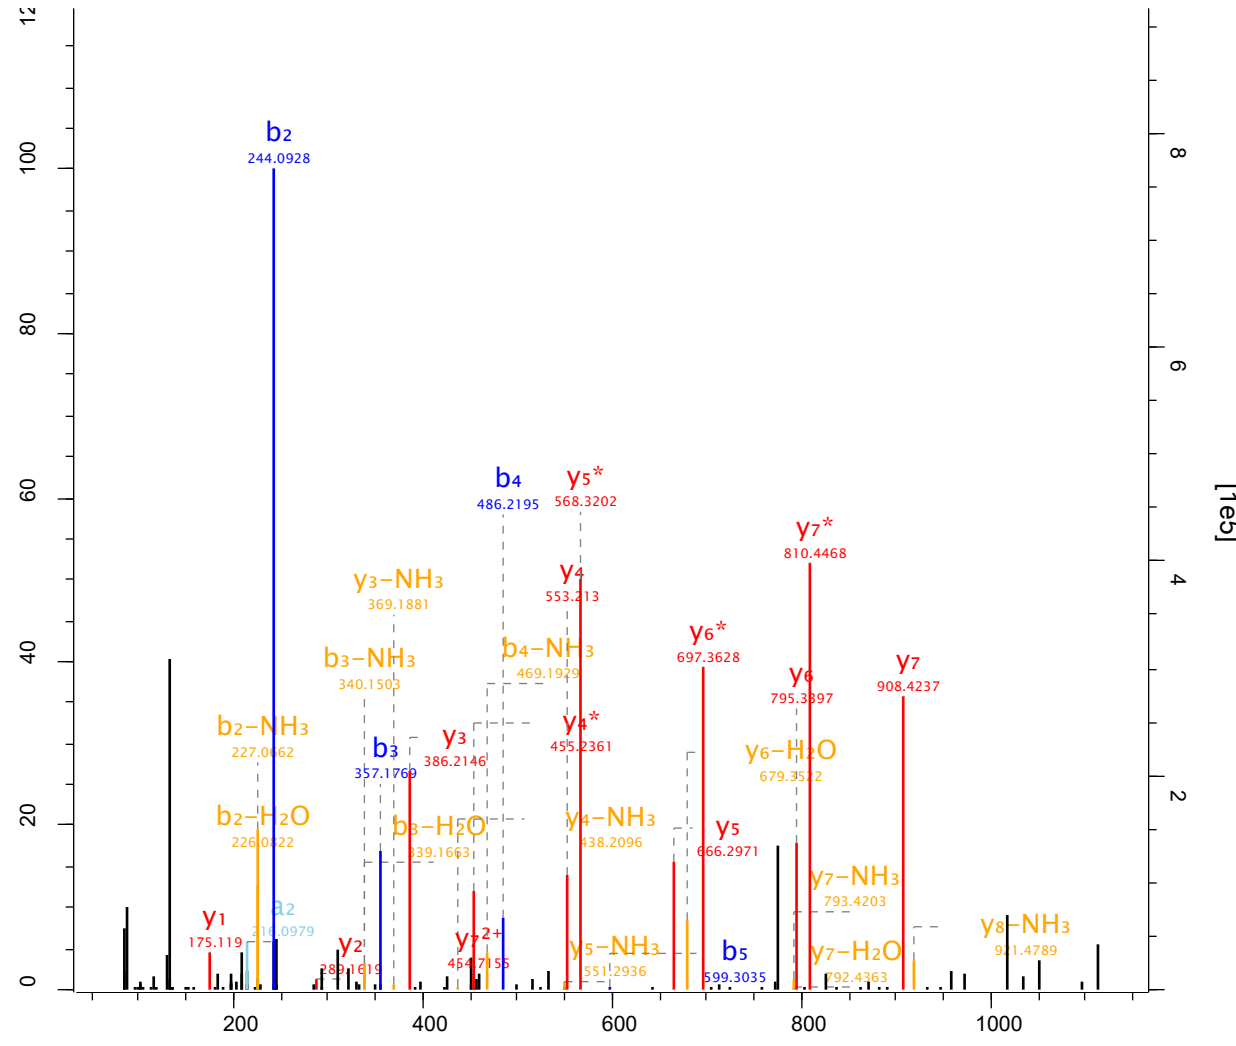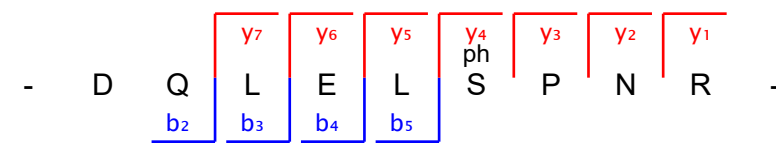



Raw file Scan Method Score m/z  
 sys\_15\_1 17509 FTMS; HCD 69.98 848.86

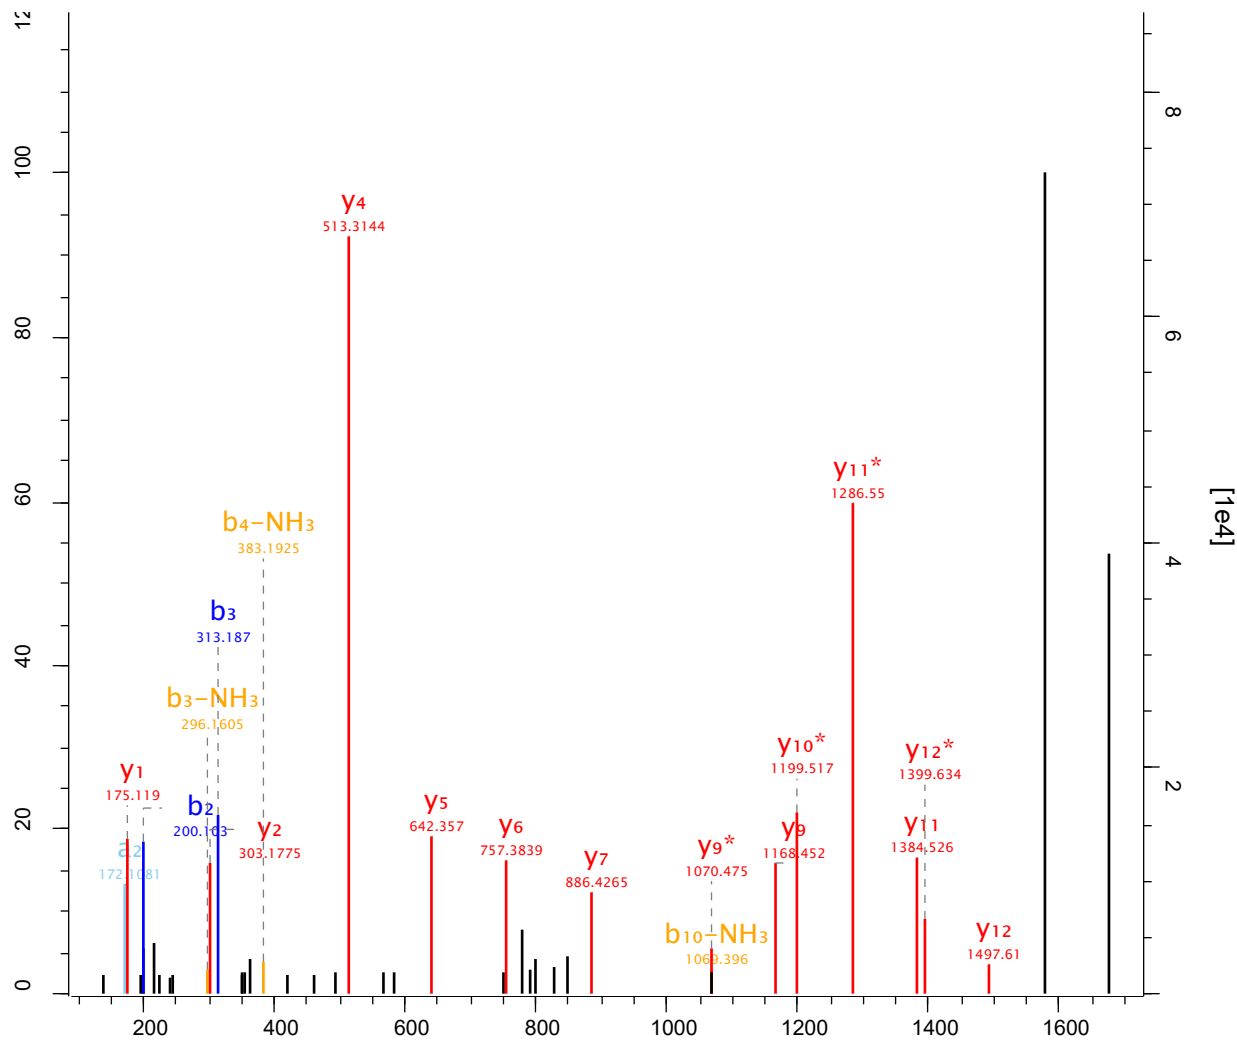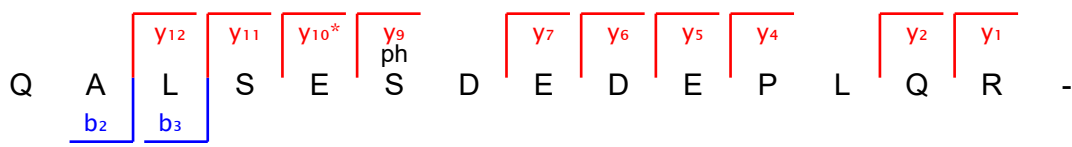

Raw file Scan Method Score m/z  
 sys\_15\_1 17529 FTMS; HCD 148.96 580.75

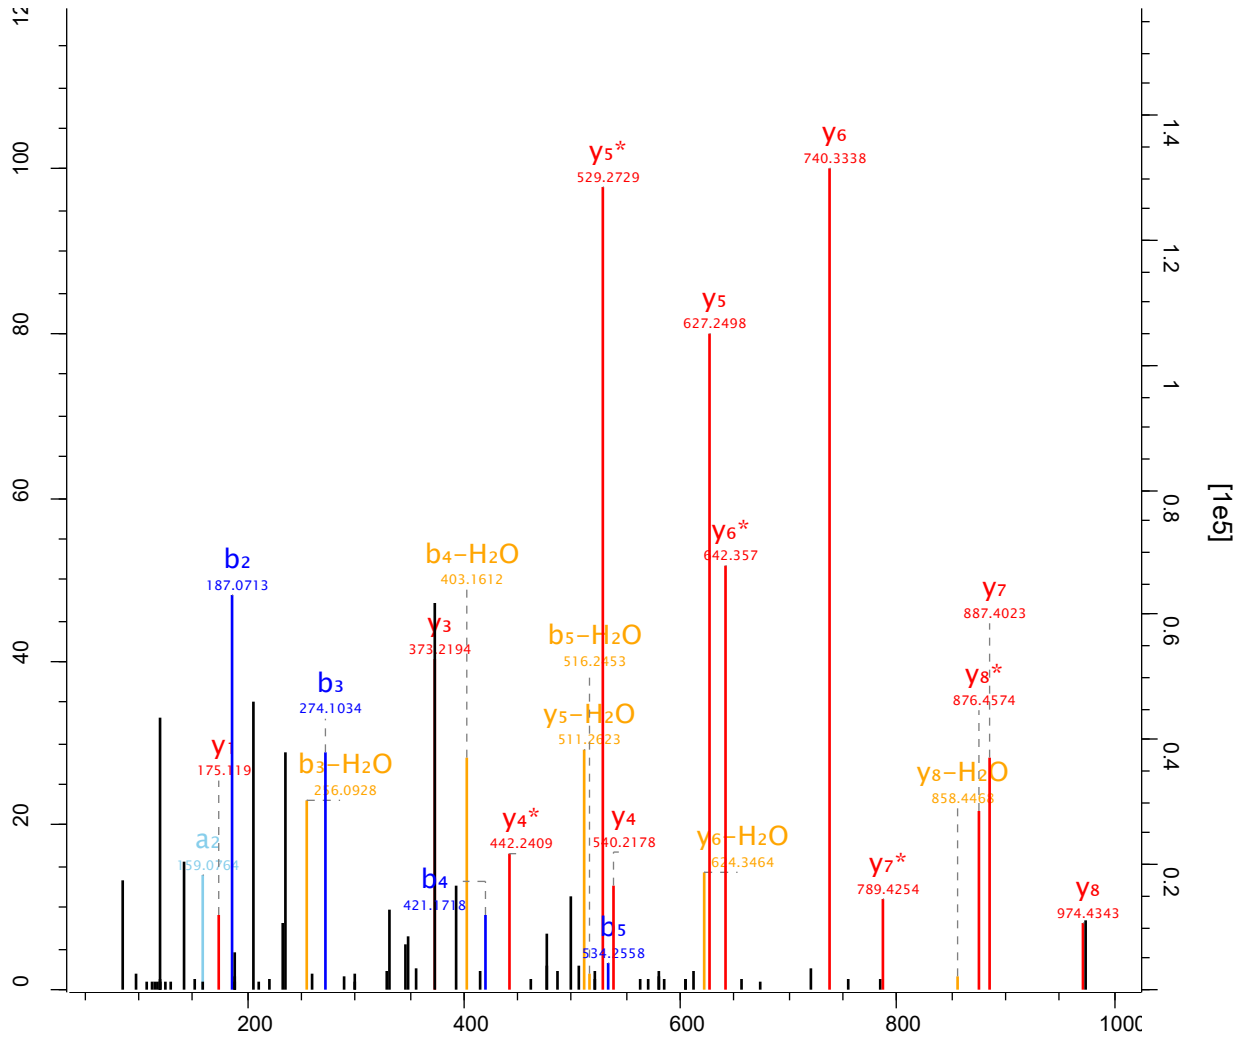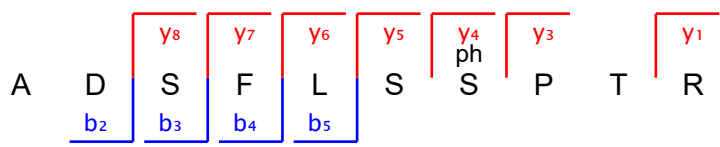

Raw file Scan Method Score m/z  
 sys\_15\_1 17623 FTMS; HCD 111.34 697.83

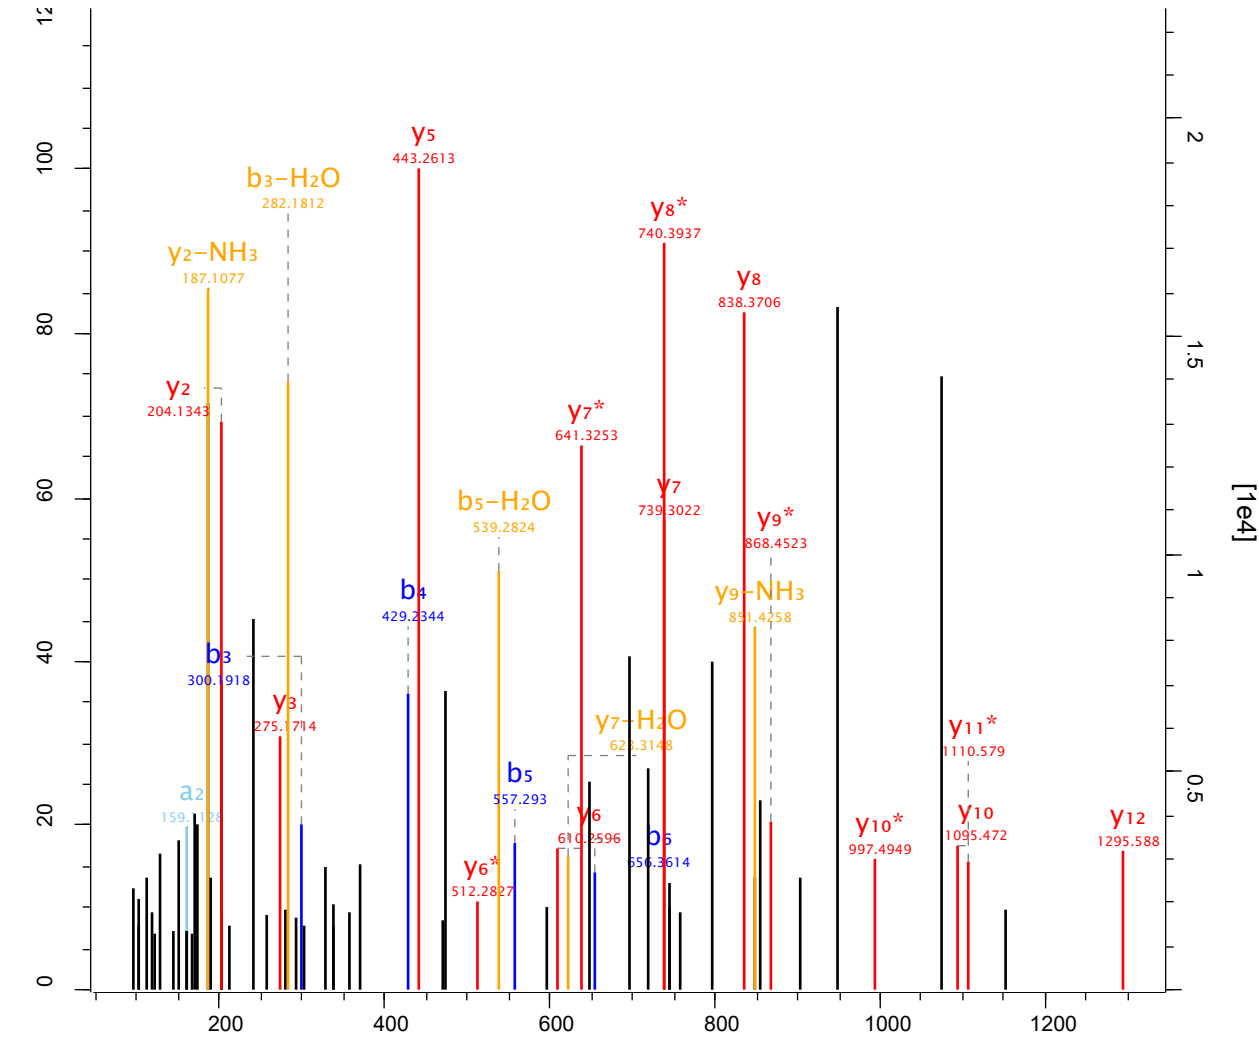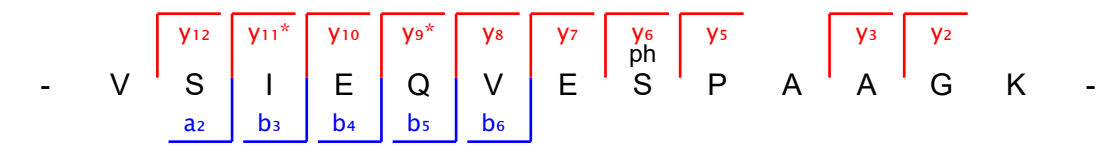

Raw file Scan Method Score m/z  
 sys\_15\_1 17648 FTMS; HCD 79.68 591.93

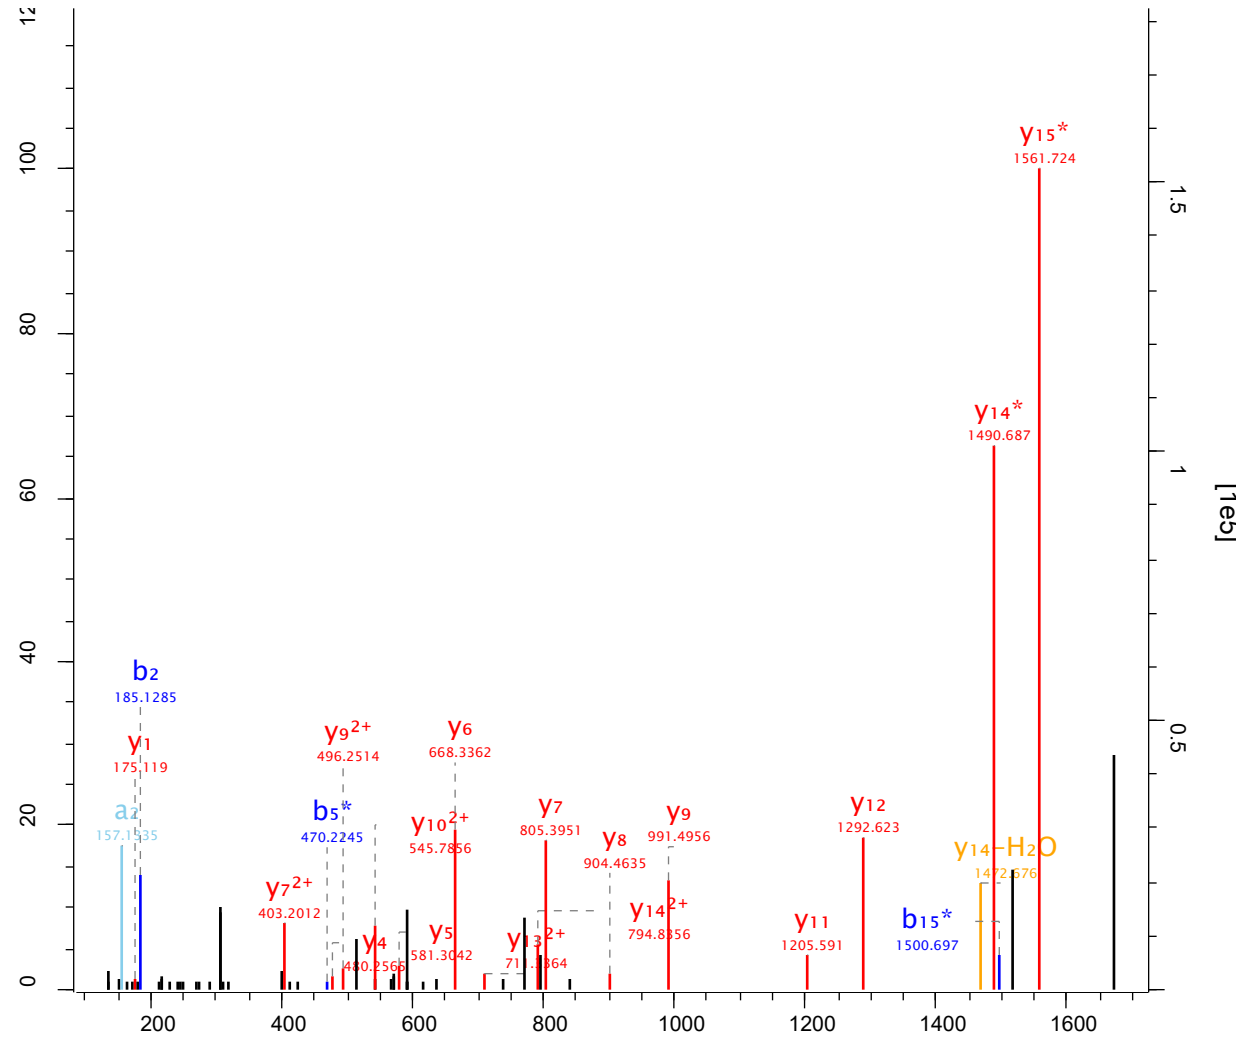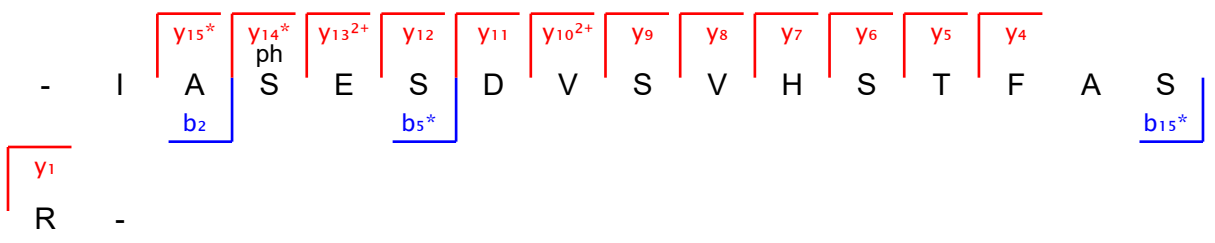

Raw file Scan Method Score m/z  
 sys\_15\_1 17651 FTMS; HCD 97.69 598.27

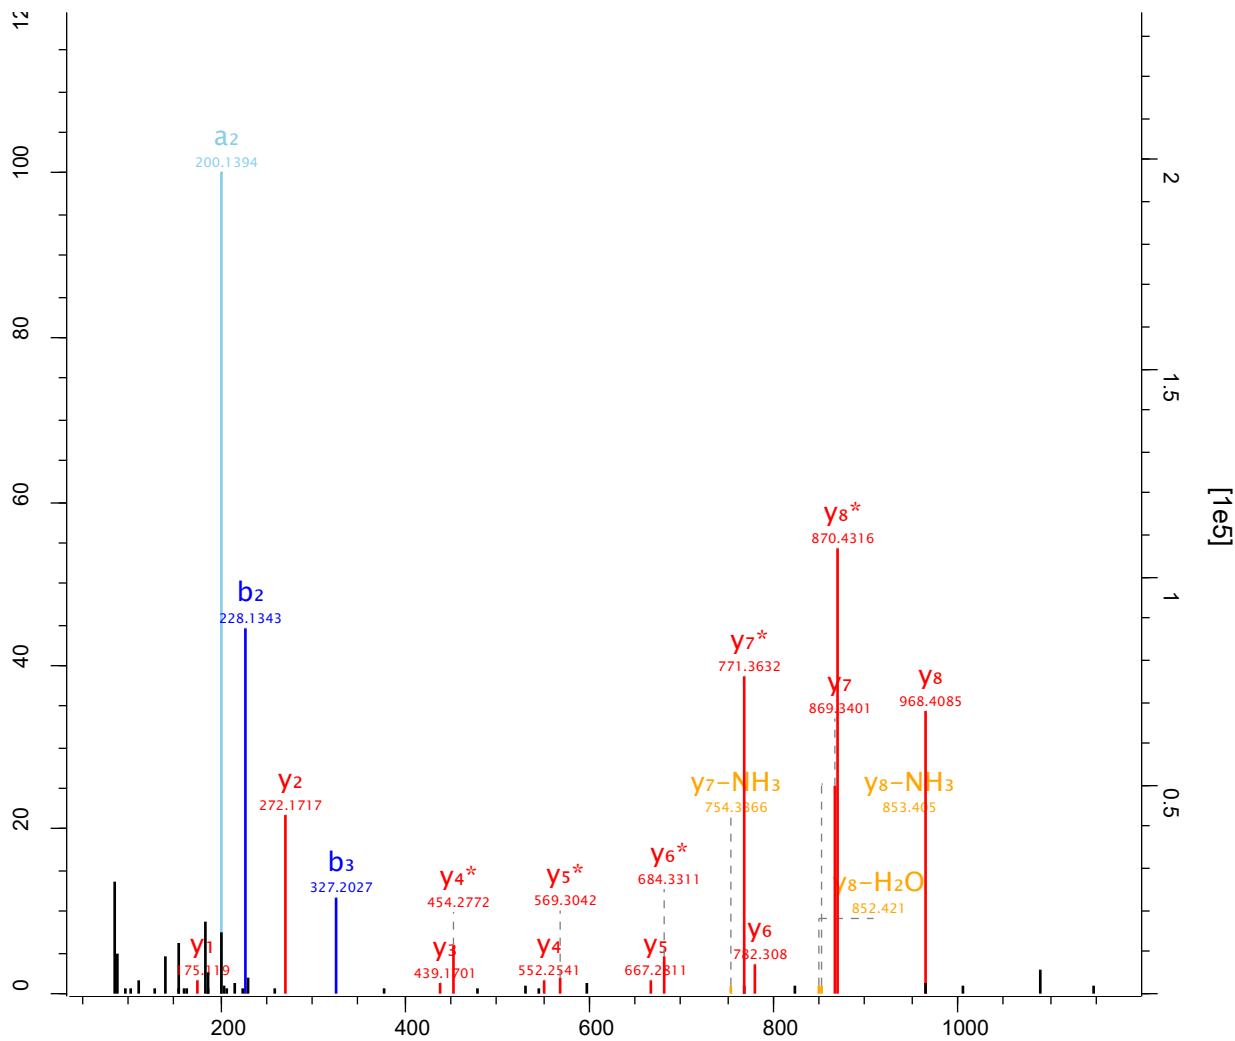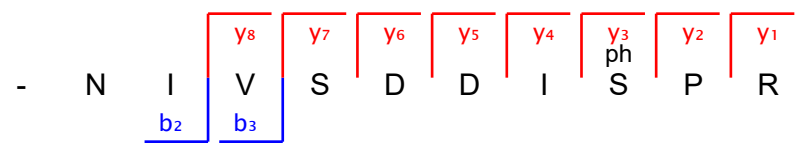

Raw file Scan Method Score m/z  
 sys\_15\_1 17772 FTMS; HCD 91.81 657.74

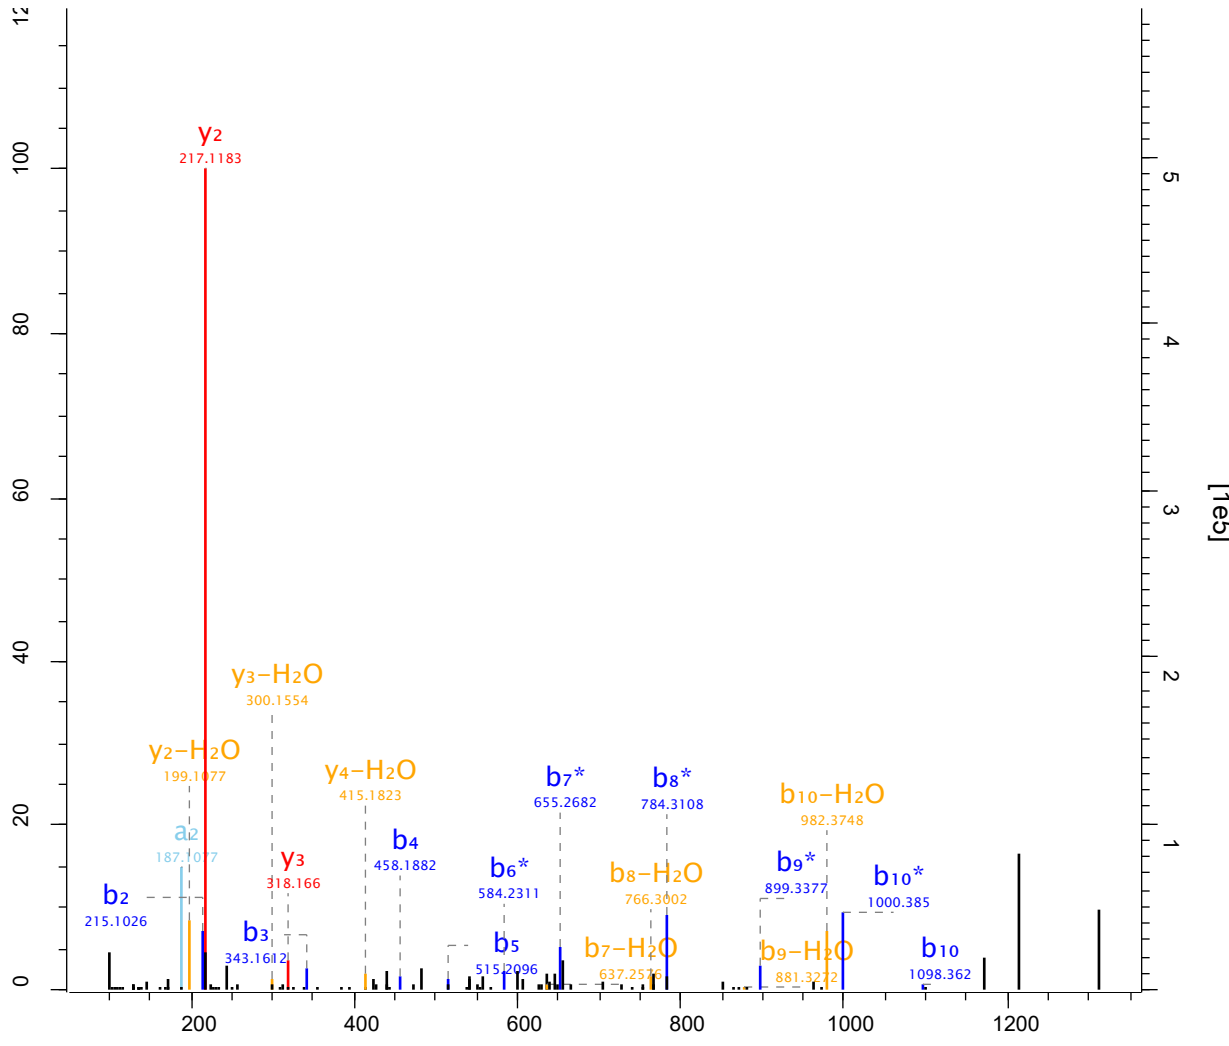

- D V Q D G ph S A E D T P T -  
 b2 b3 b4 b5 b6\* b7\* b8\* b9\* b10 y3 y2

Raw file Scan Method Score m/z  
 sys\_15\_1 17862 FTMS; HCD 69.7 885.86

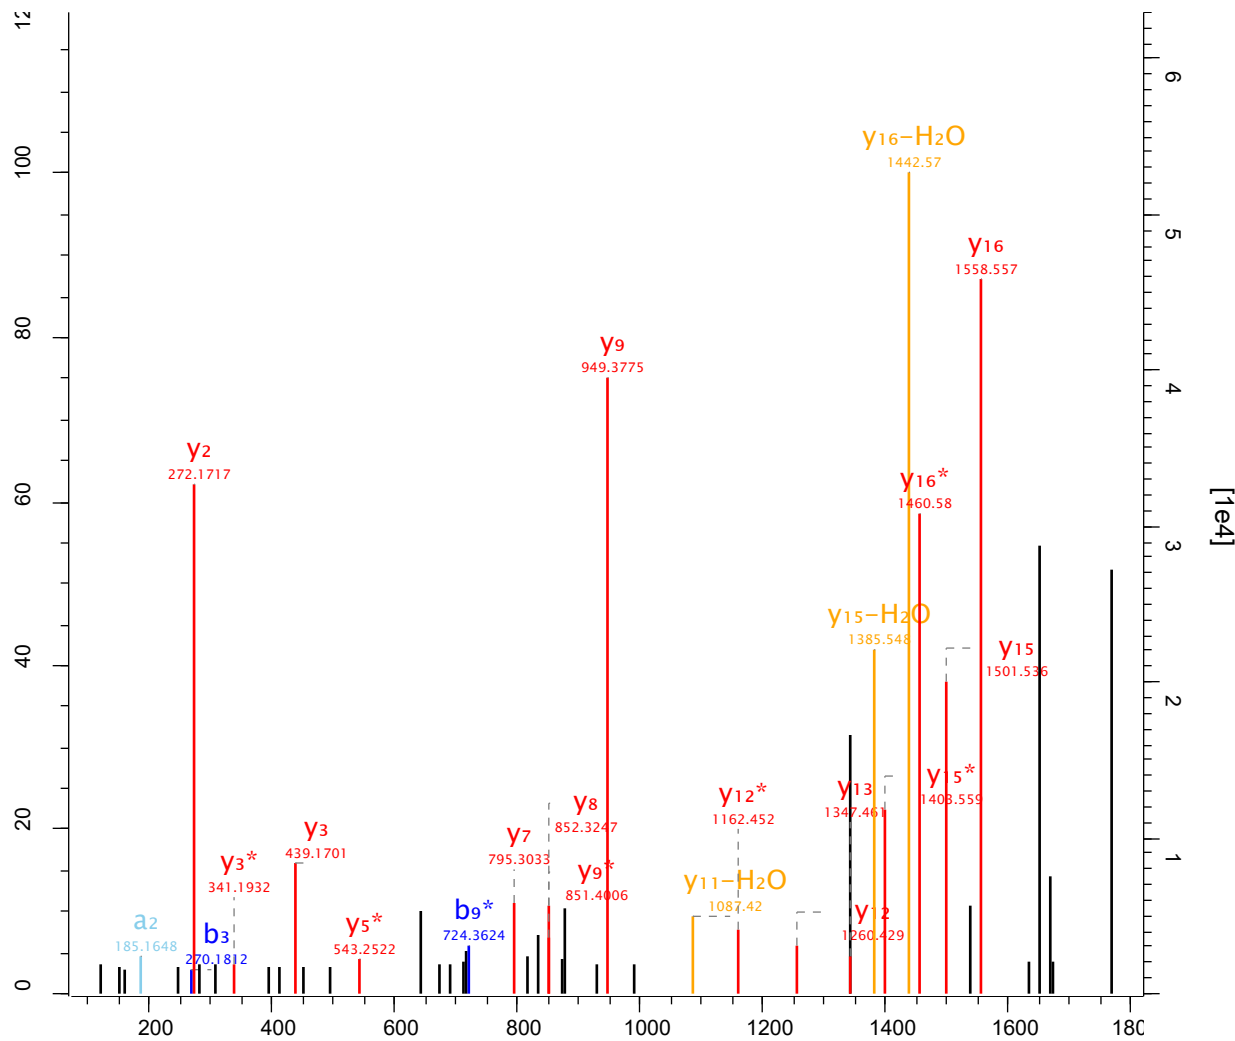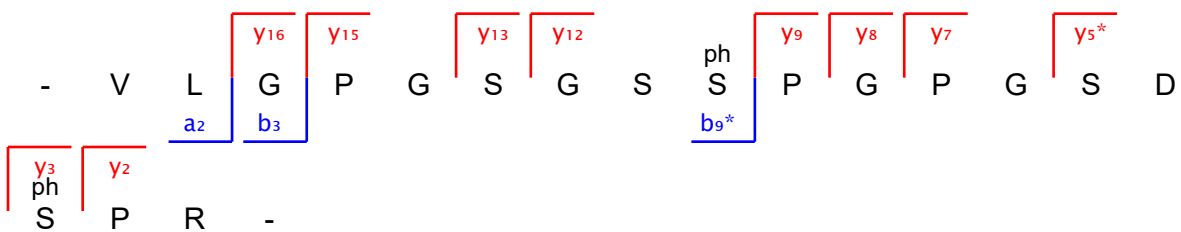

Raw file Scan Method Score m/z  
 sys\_15\_1 17892 FTMS; HCD 62.62 795.01

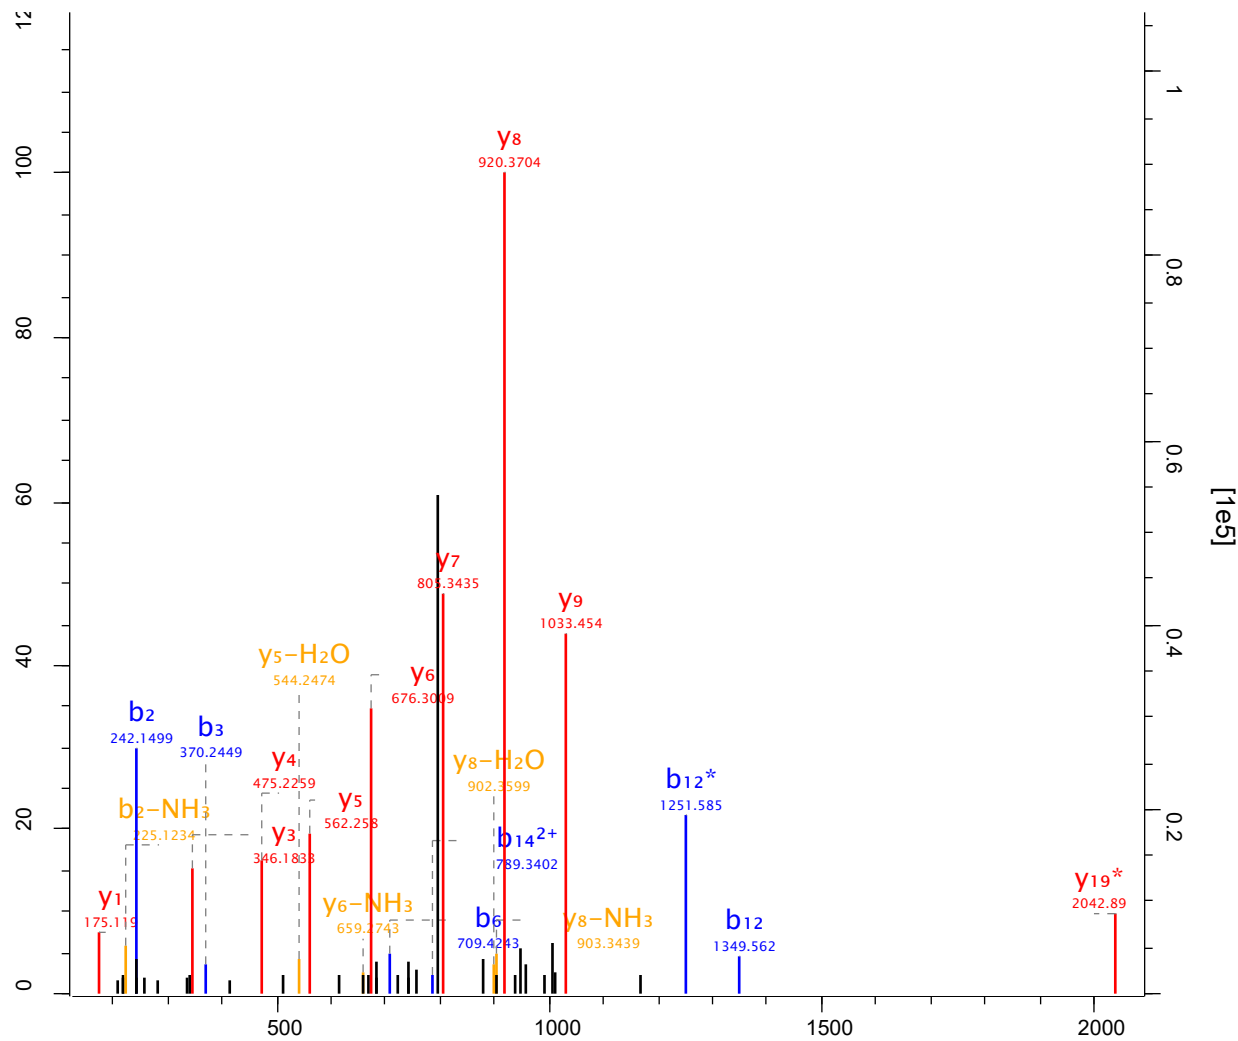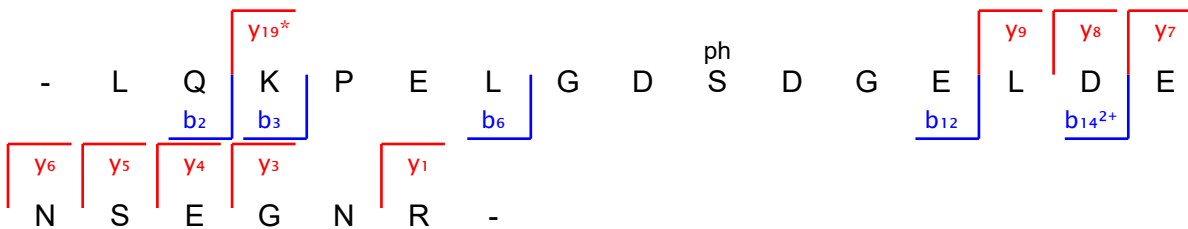



Raw file Scan Method Score m/z  
 sys\_15\_1 17953 FTMS; HCD 125.79 888.9

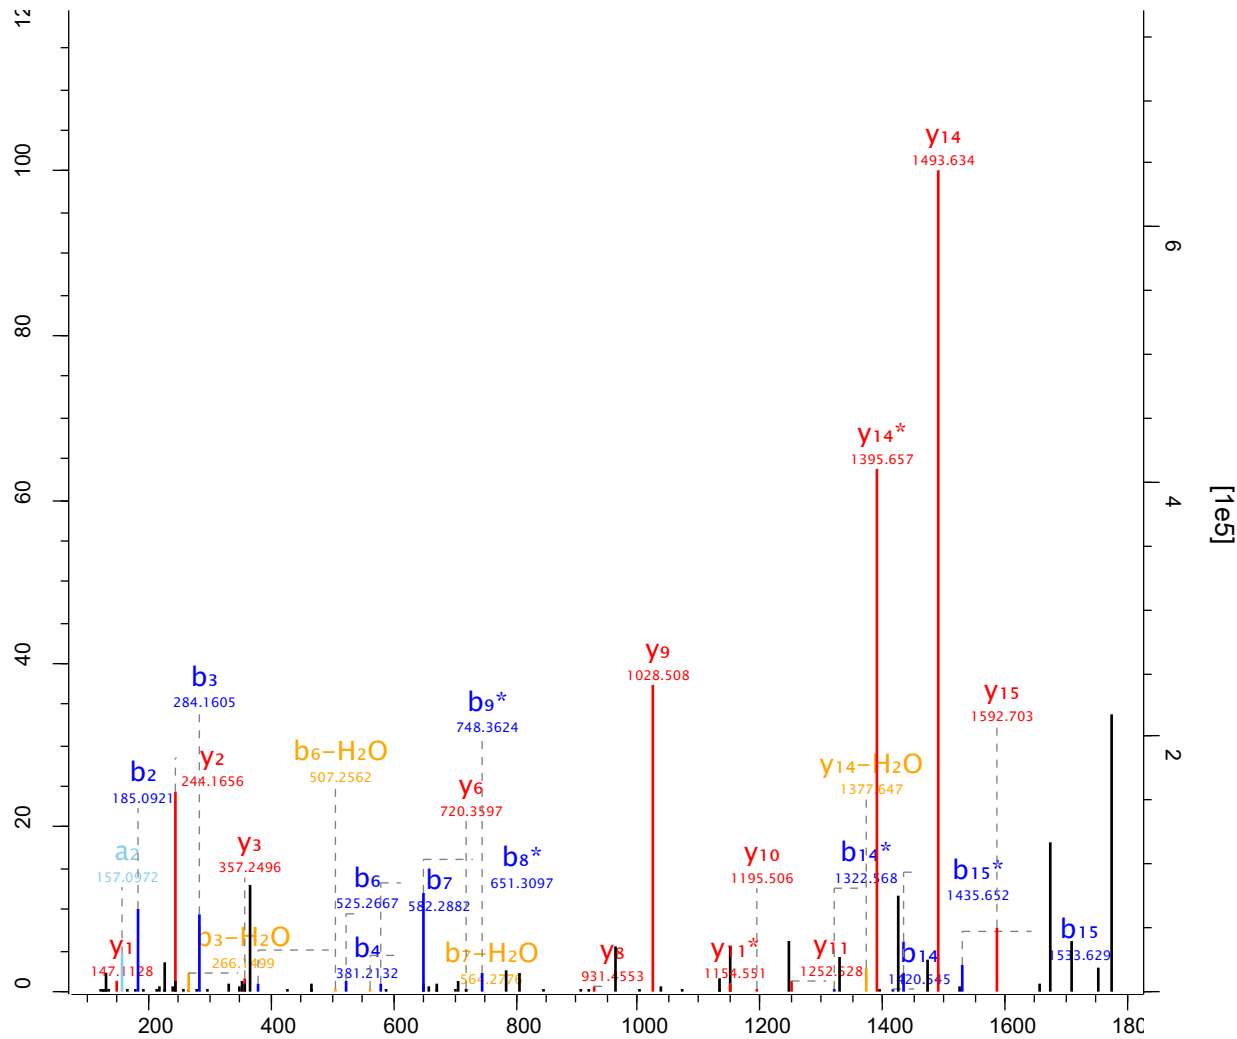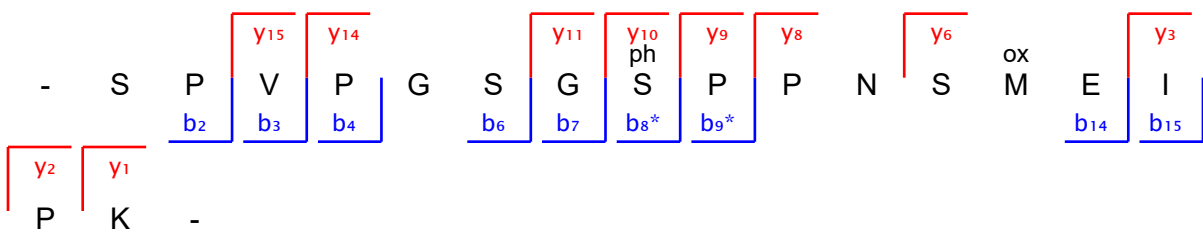

Raw file Scan Method Score m/z  
 sys\_15\_1 18008 FTMS; HCD 51.94 563.78

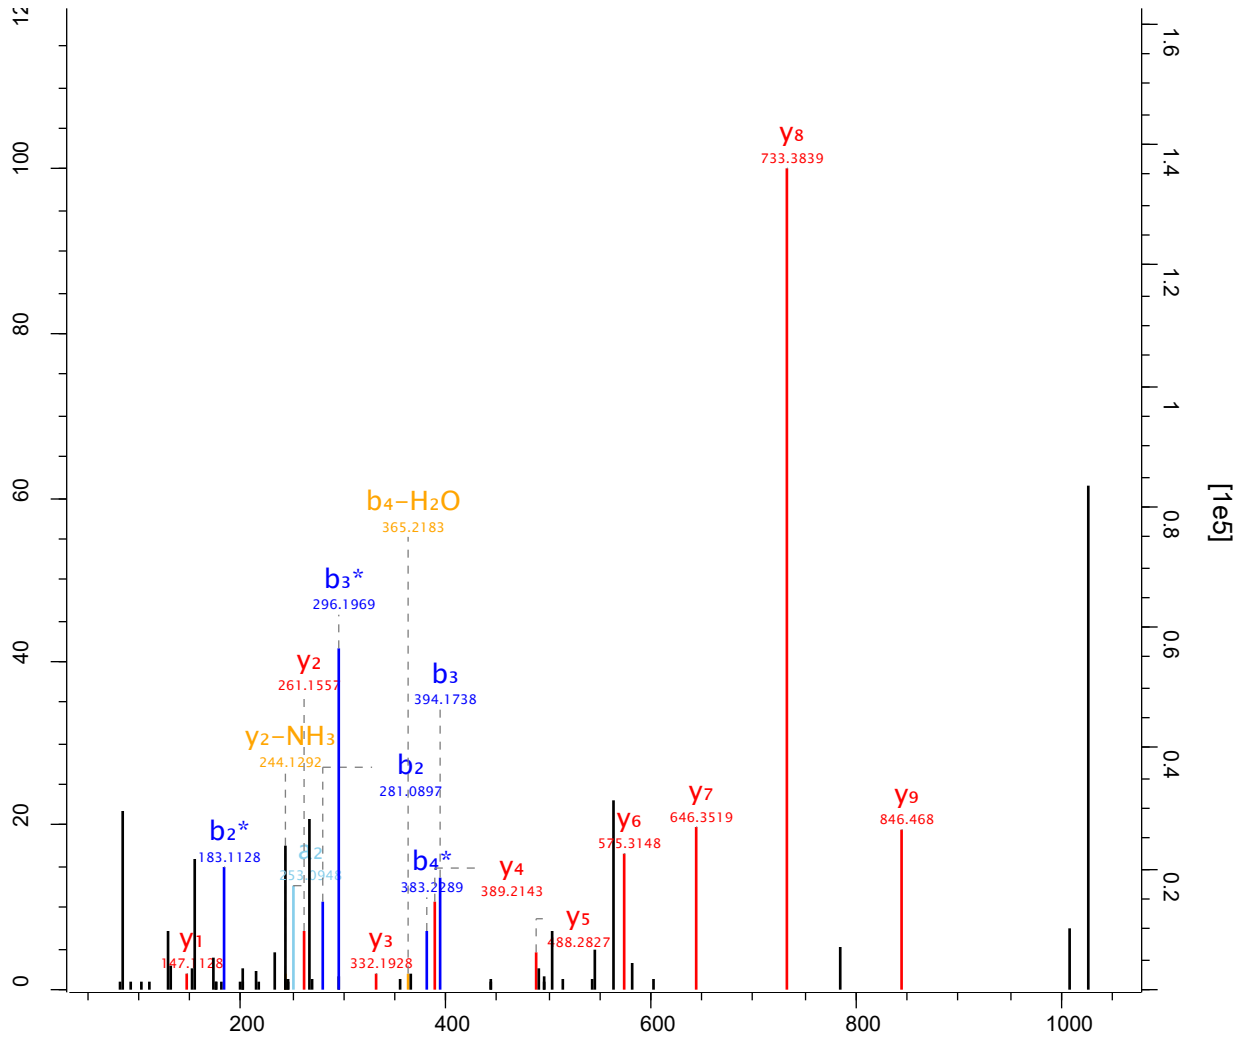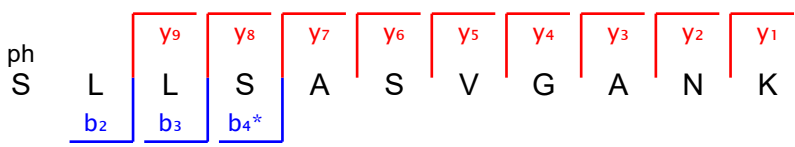

Raw file Scan Method Score m/z  
 sys\_15\_1 18070 FTMS; HCD 211.45 705.82

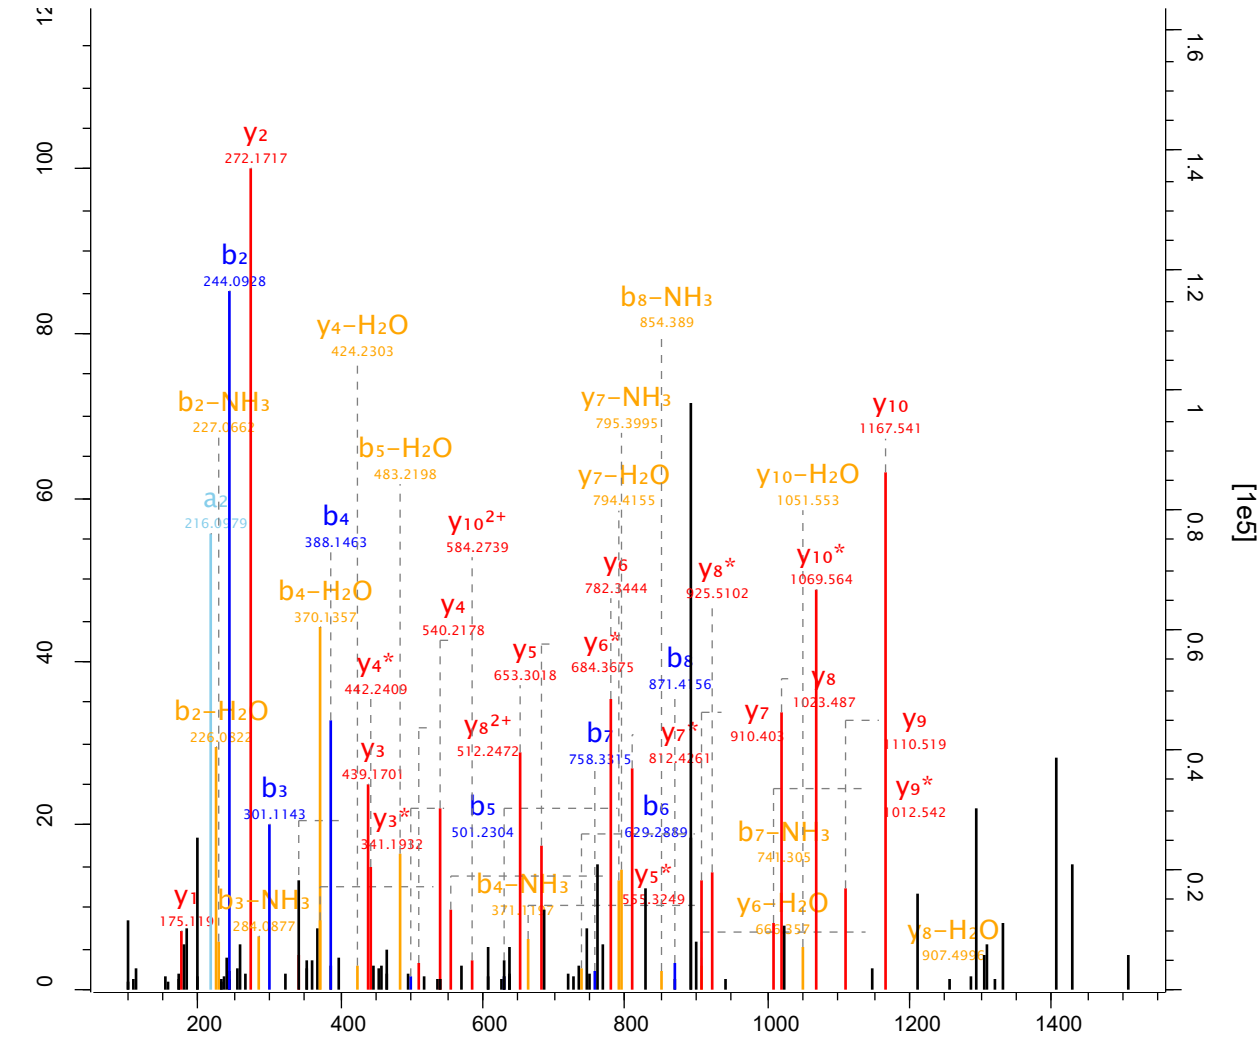

- N E G S I Q E L T S P R -

b<sub>2</sub>
b<sub>3</sub>
b<sub>4</sub>
b<sub>5</sub>
b<sub>6</sub>
b<sub>7</sub>
b<sub>8</sub>
y<sub>10</sub>
y<sub>9</sub>
y<sub>8</sub>
y<sub>7</sub>
y<sub>6</sub>
y<sub>5</sub>
y<sub>4</sub>
y<sub>3</sub>  
ph
y<sub>2</sub>
y<sub>1</sub>

Raw file Scan Method Score m/z  
 sys\_15\_1 1810 FTMS; HCD 56.57 641.79

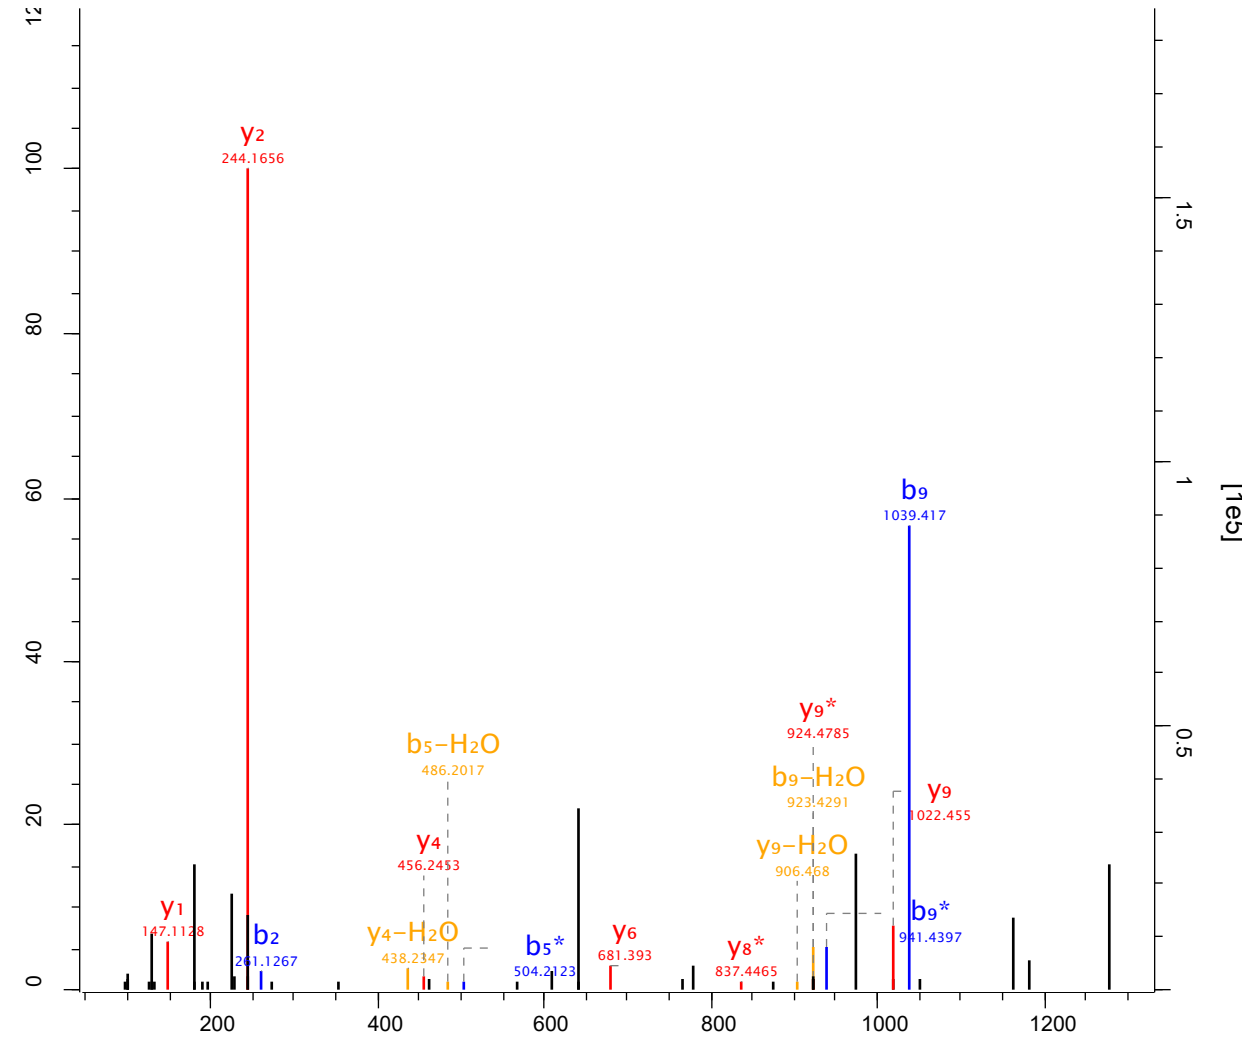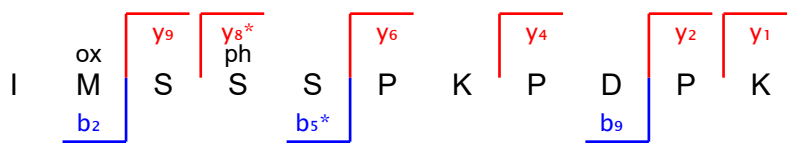

Raw file Scan Method Score m/z  
 sys\_15\_1 18134 FTMS; HCD 135.8 527.73

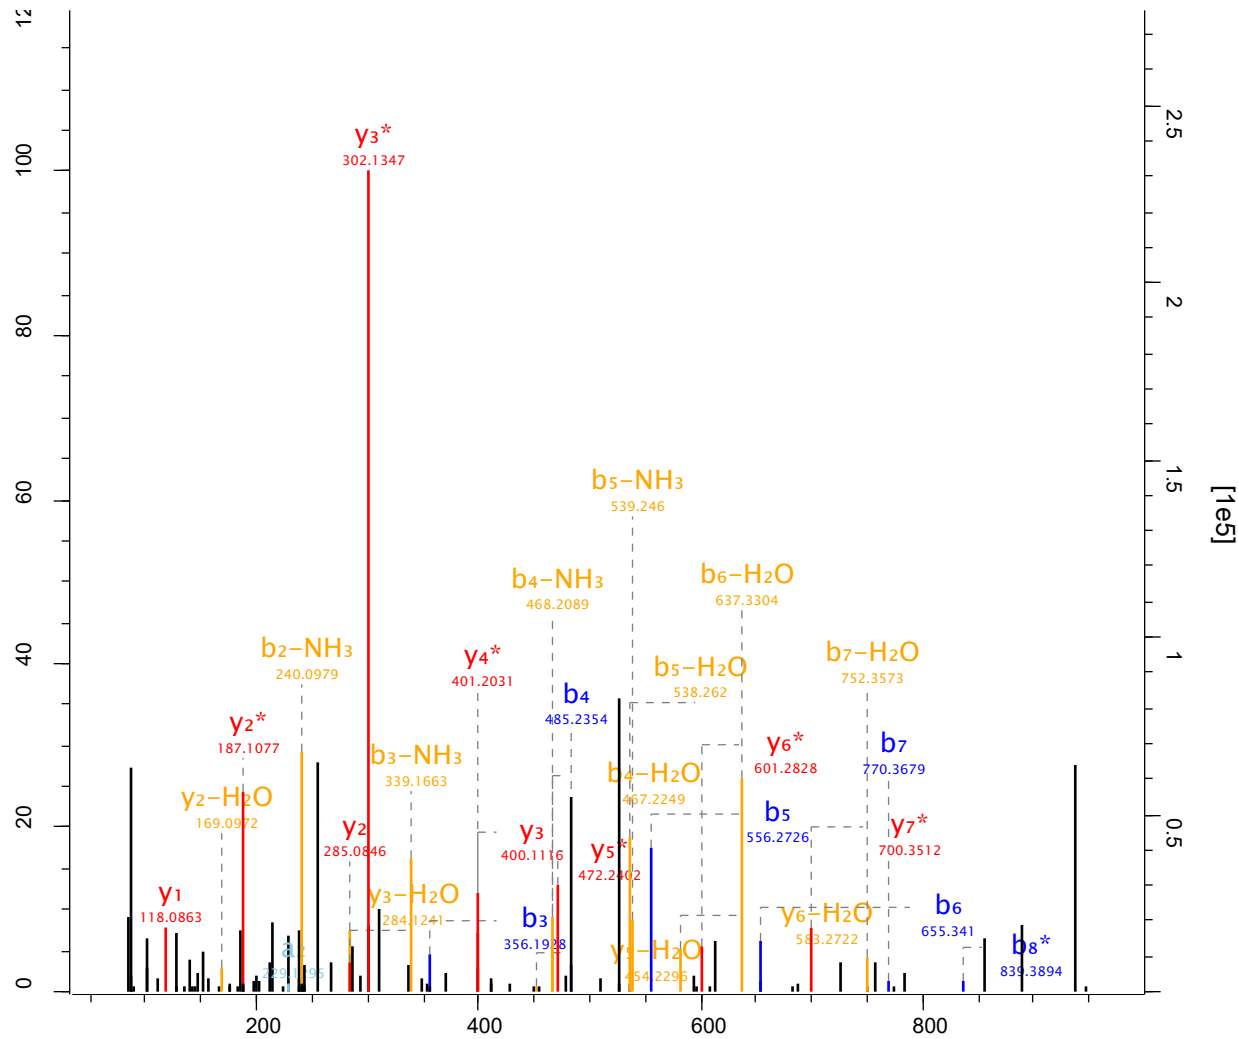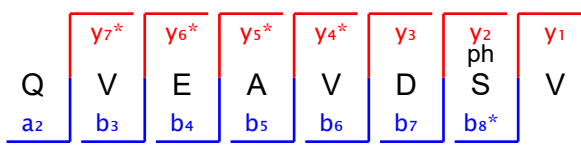

Raw file Scan Method Score m/z  
 sys\_15\_1 18194 FTMS; HCD 50.86 904.38

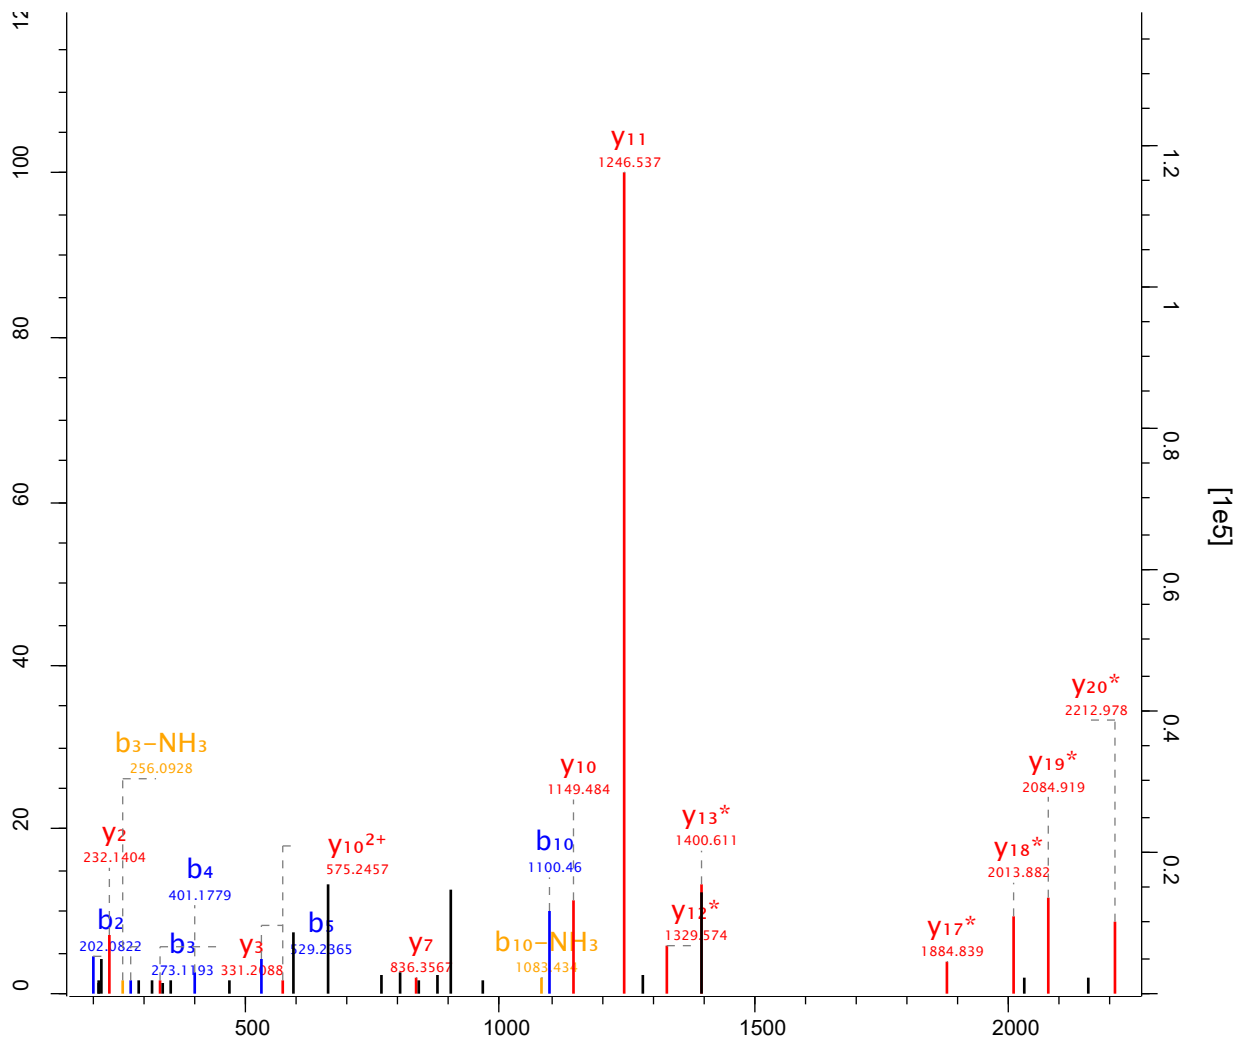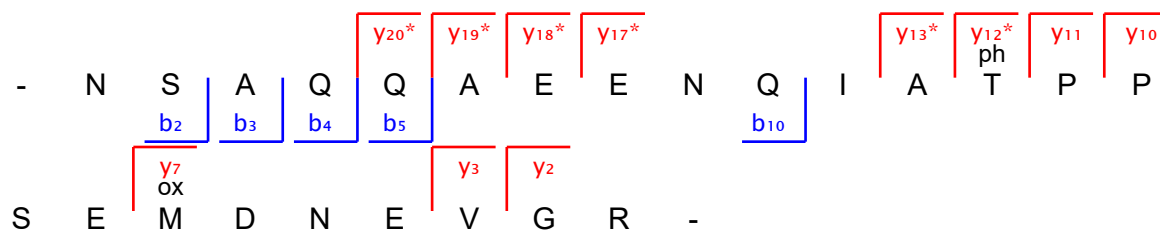

Raw file Scan Method Score m/z  
 sys\_15\_1 18273 FTMS; HCD 159.66 557.27

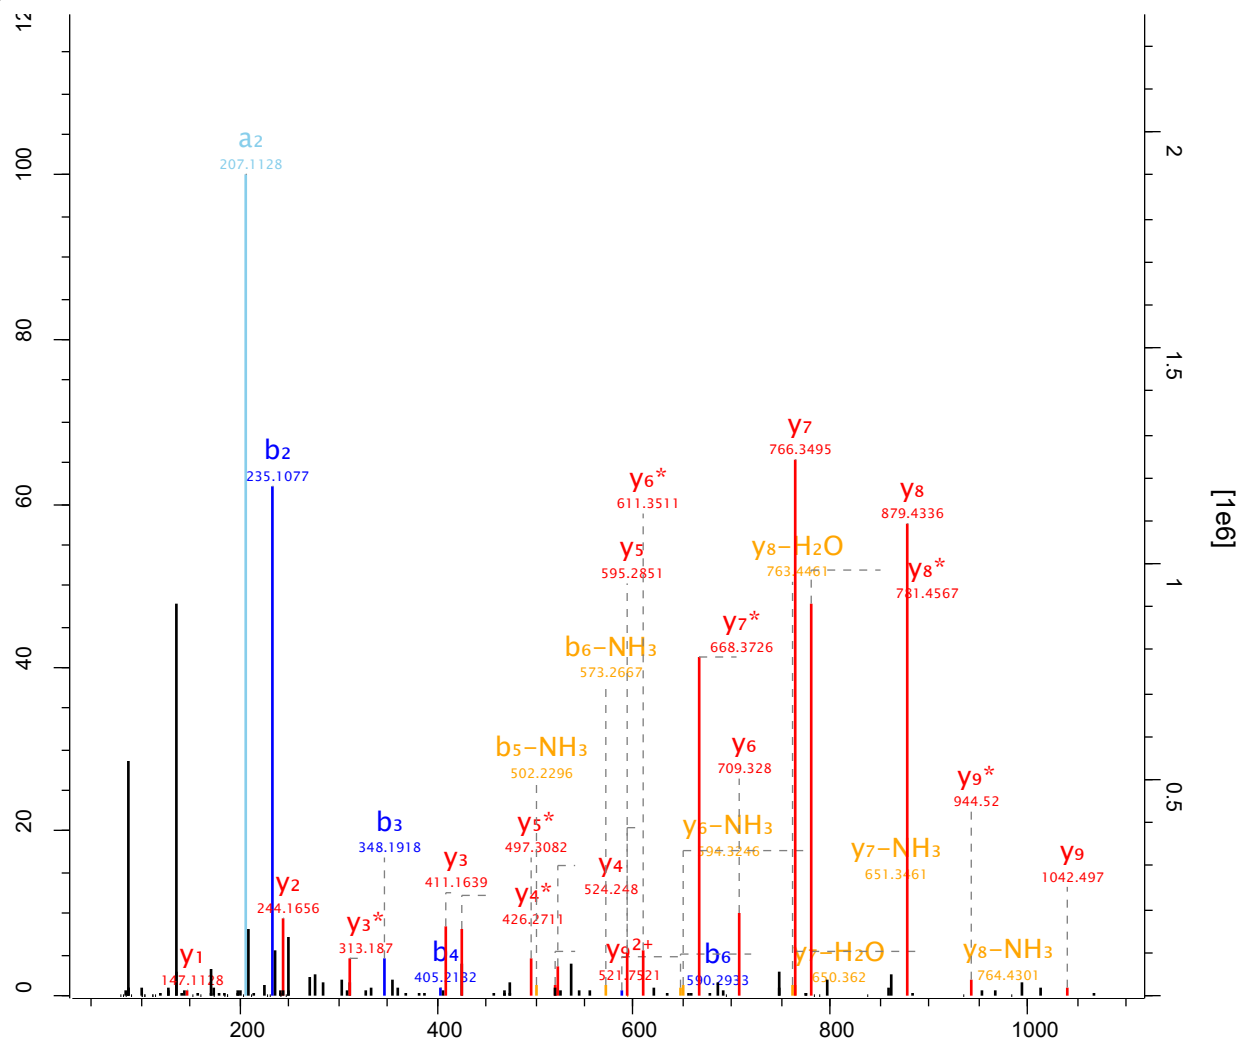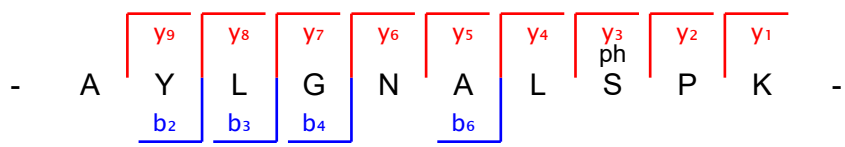

Raw file Scan Method Score m/z  
 sys\_15\_1 18285 FTMS; HCD 64.12 553.73

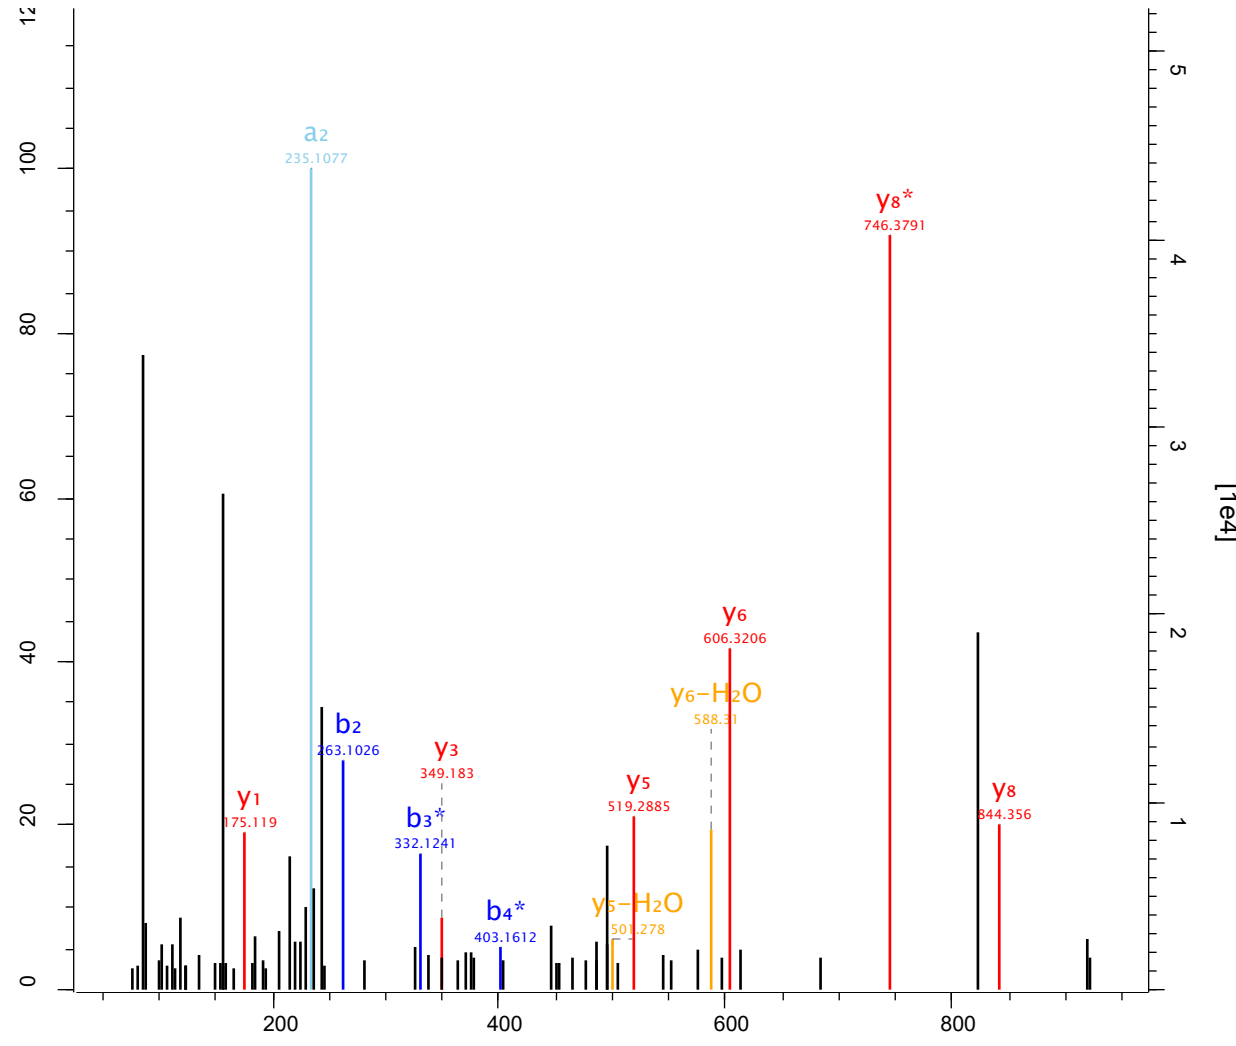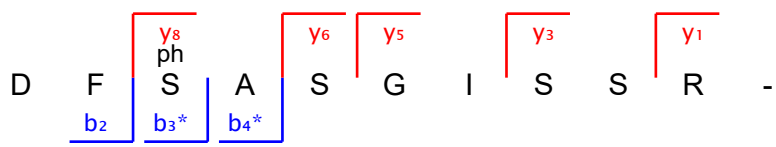



Raw file Scan Method Score m/z  
 sys\_15\_1 18288 FTMS; HCD 261.76 761.88

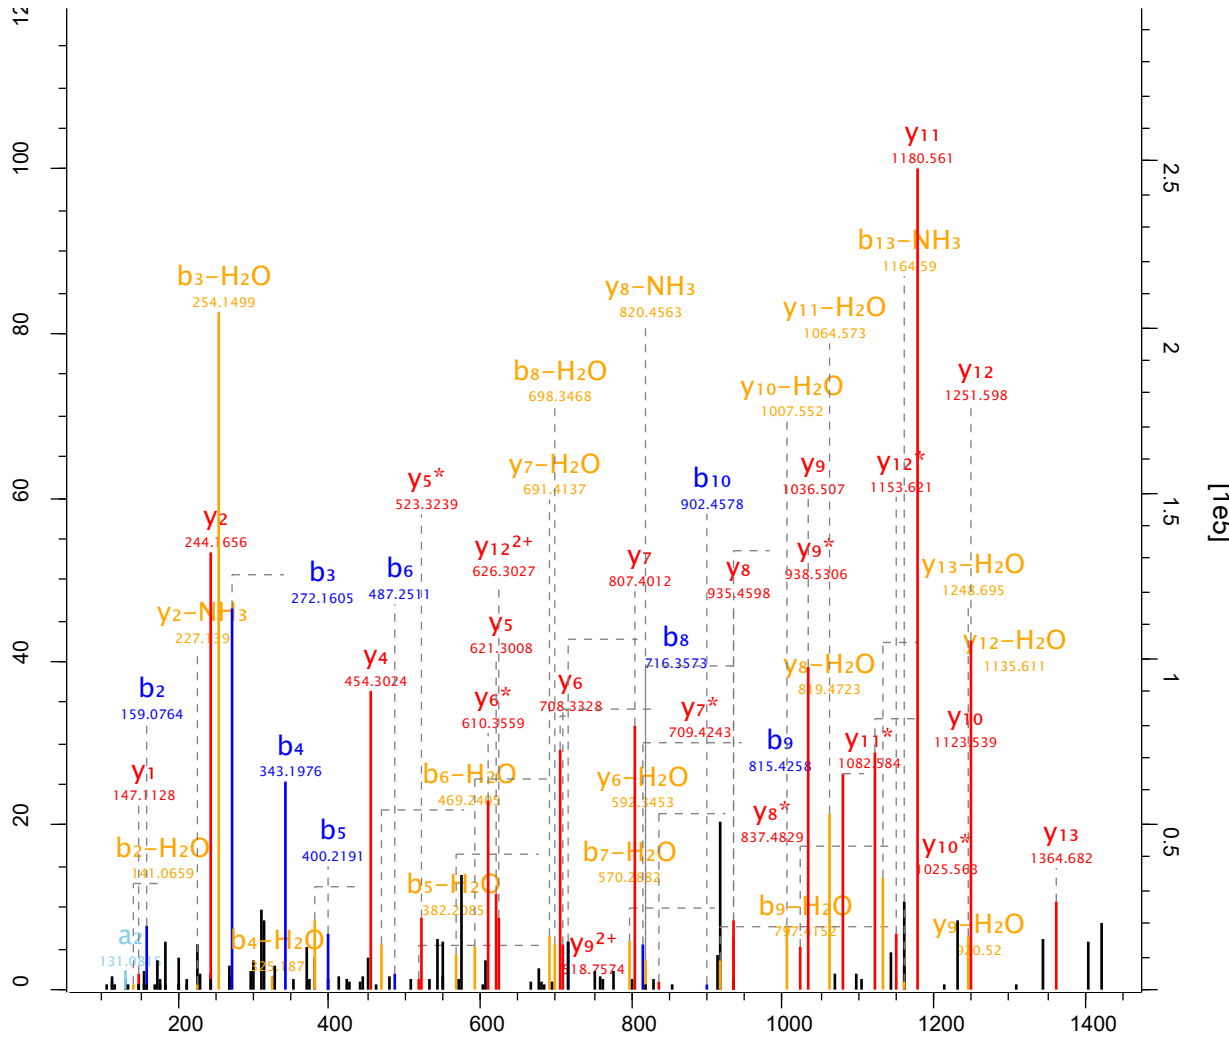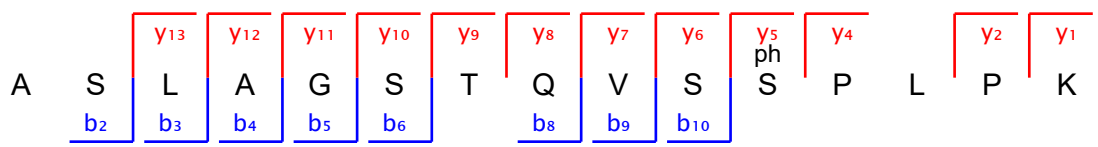

Raw file Scan Method Score m/z  
 sys\_15\_1 18394 FTMS; HCD 41.8 950.41

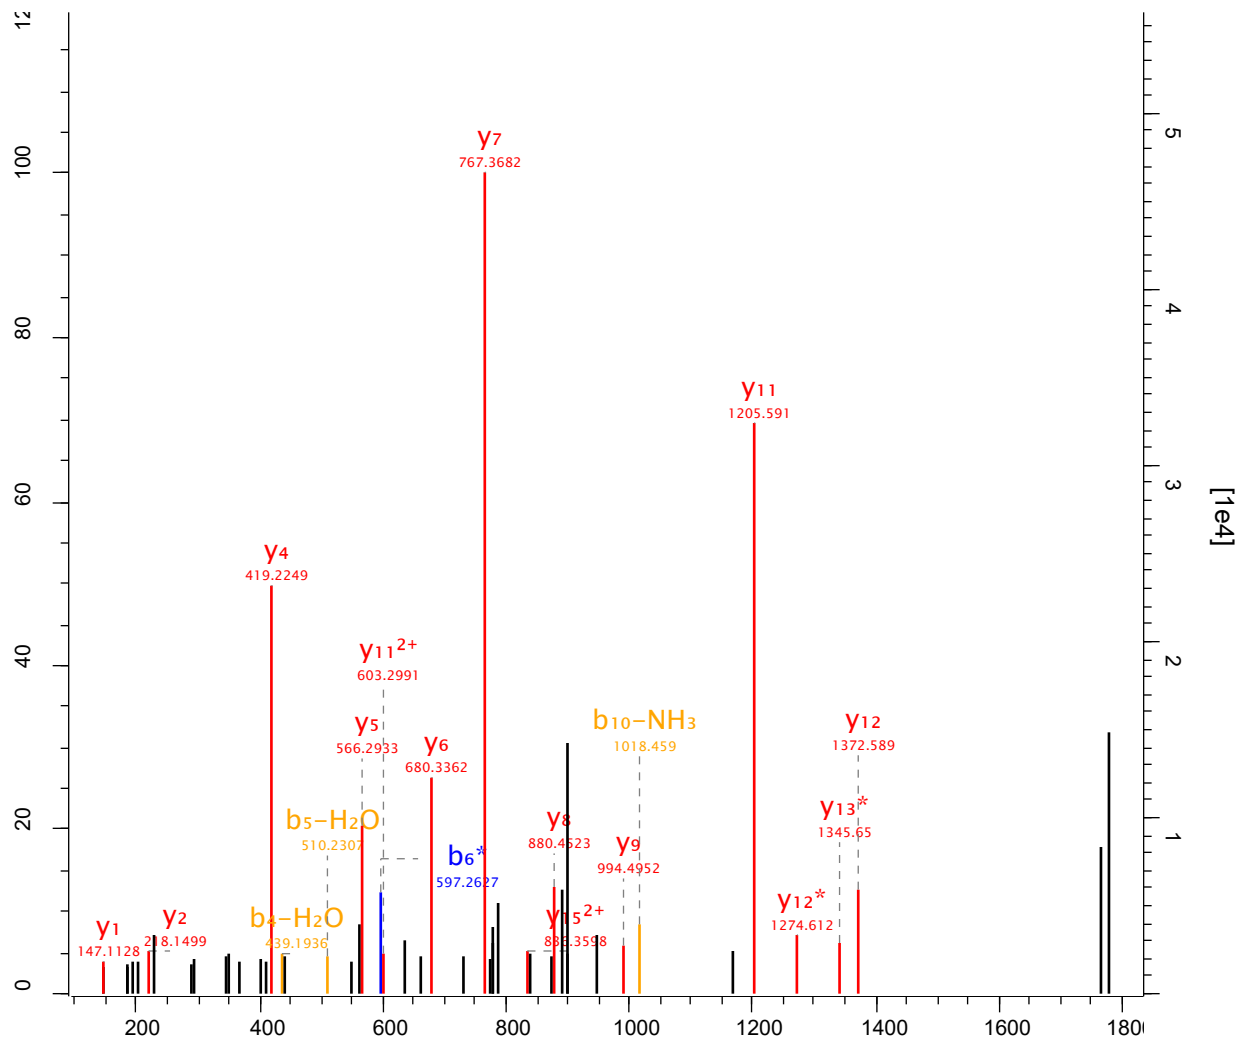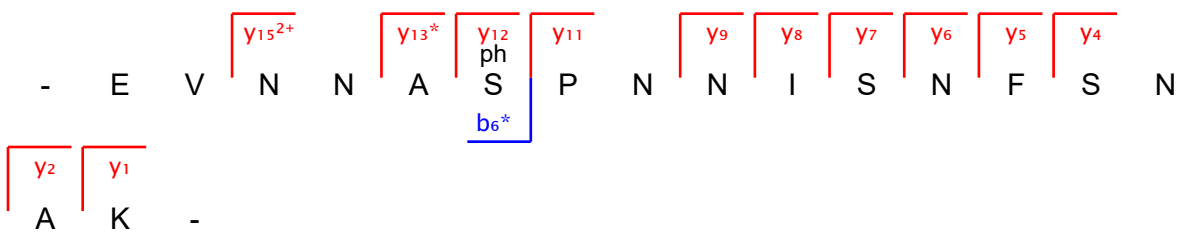

Raw file Scan Method Score m/z  
 sys\_15\_1 18410 FTMS; HCD 42.95 511.57

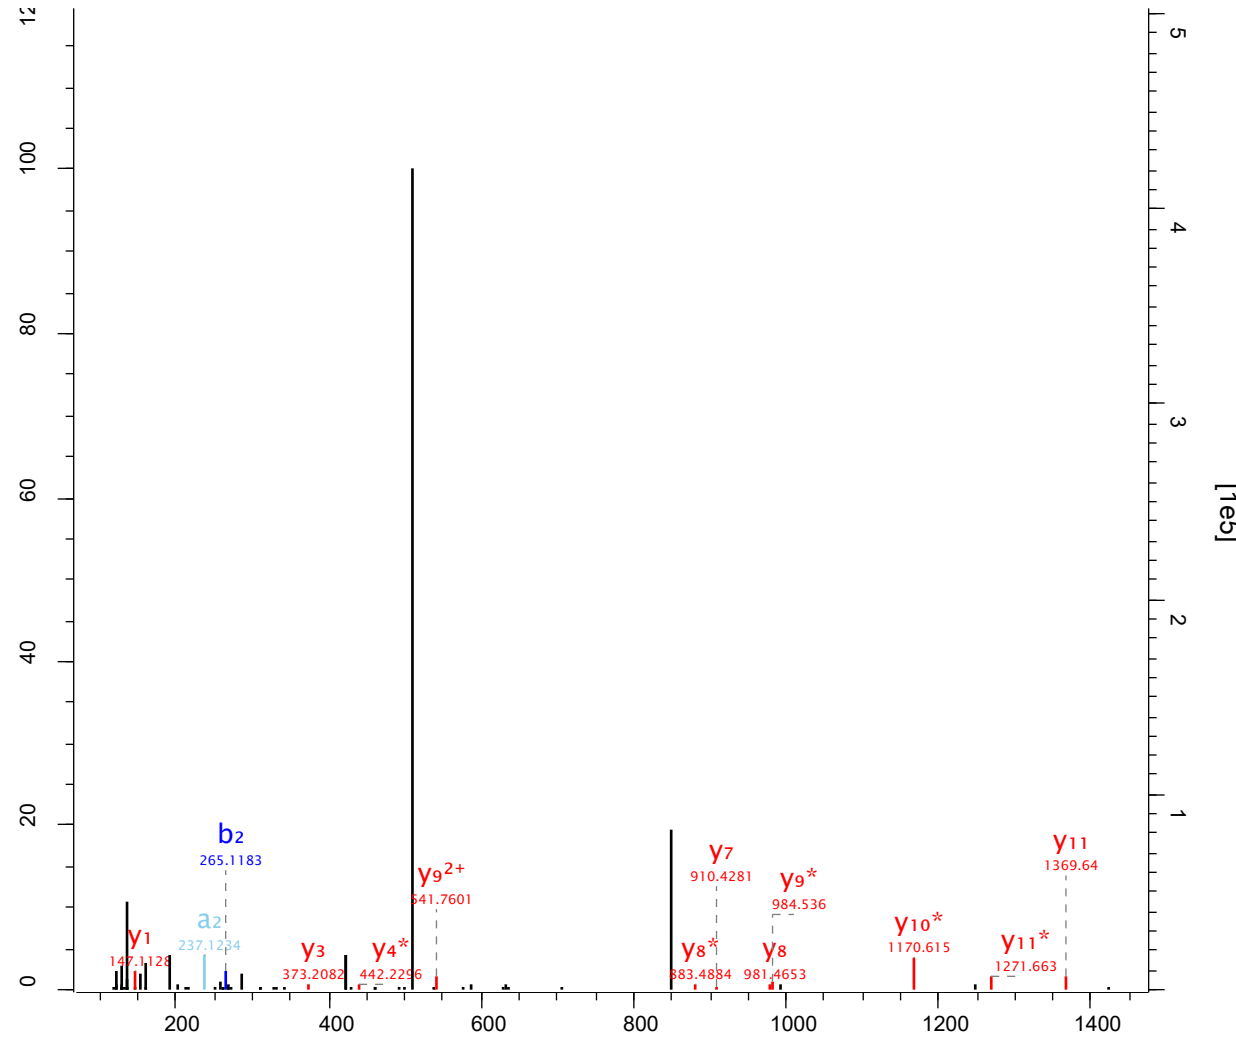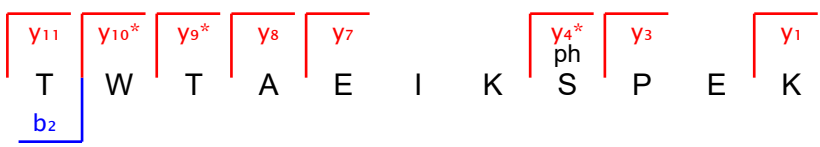

Raw file Scan Method Score m/z  
 sys\_15\_1 18432 FTMS; HCD 105.65 552.78

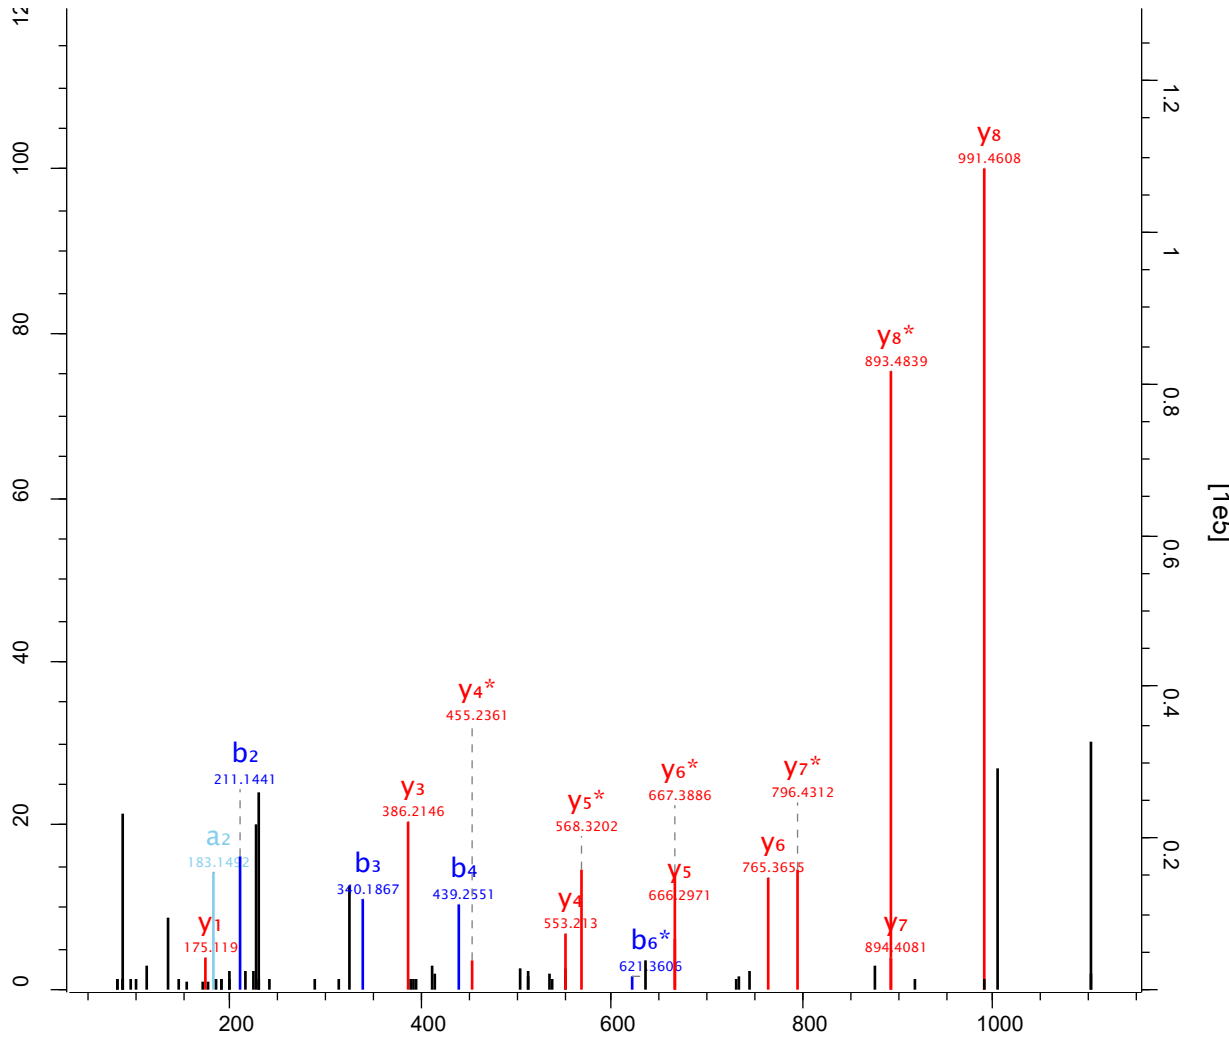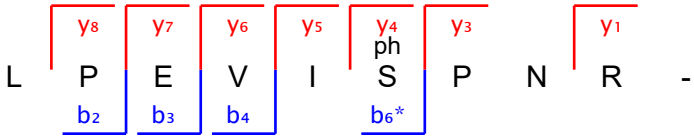

Raw file Scan Method Score m/z  
 sys\_15\_1 18537 FTMS; HCD 120.4 889.37

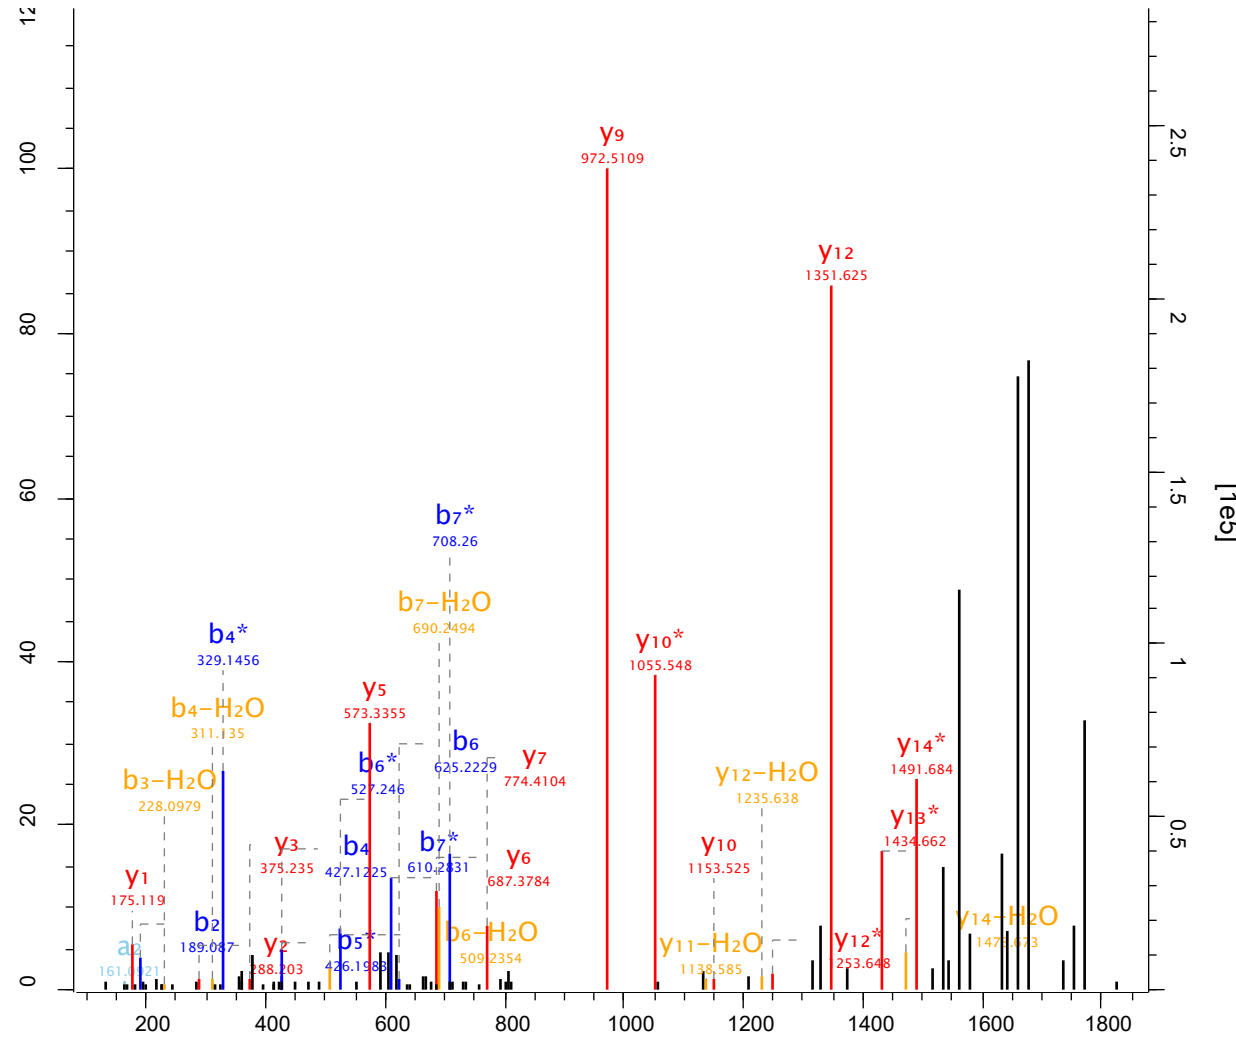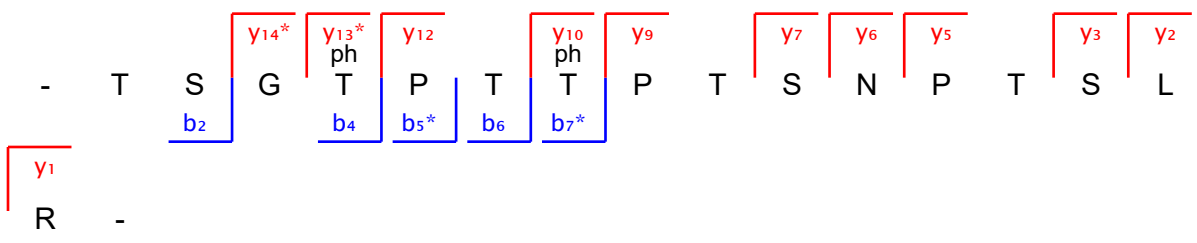

Raw file Scan Method Score m/z  
 sys\_15\_1 18559 FTMS; HCD 86.54 828.83

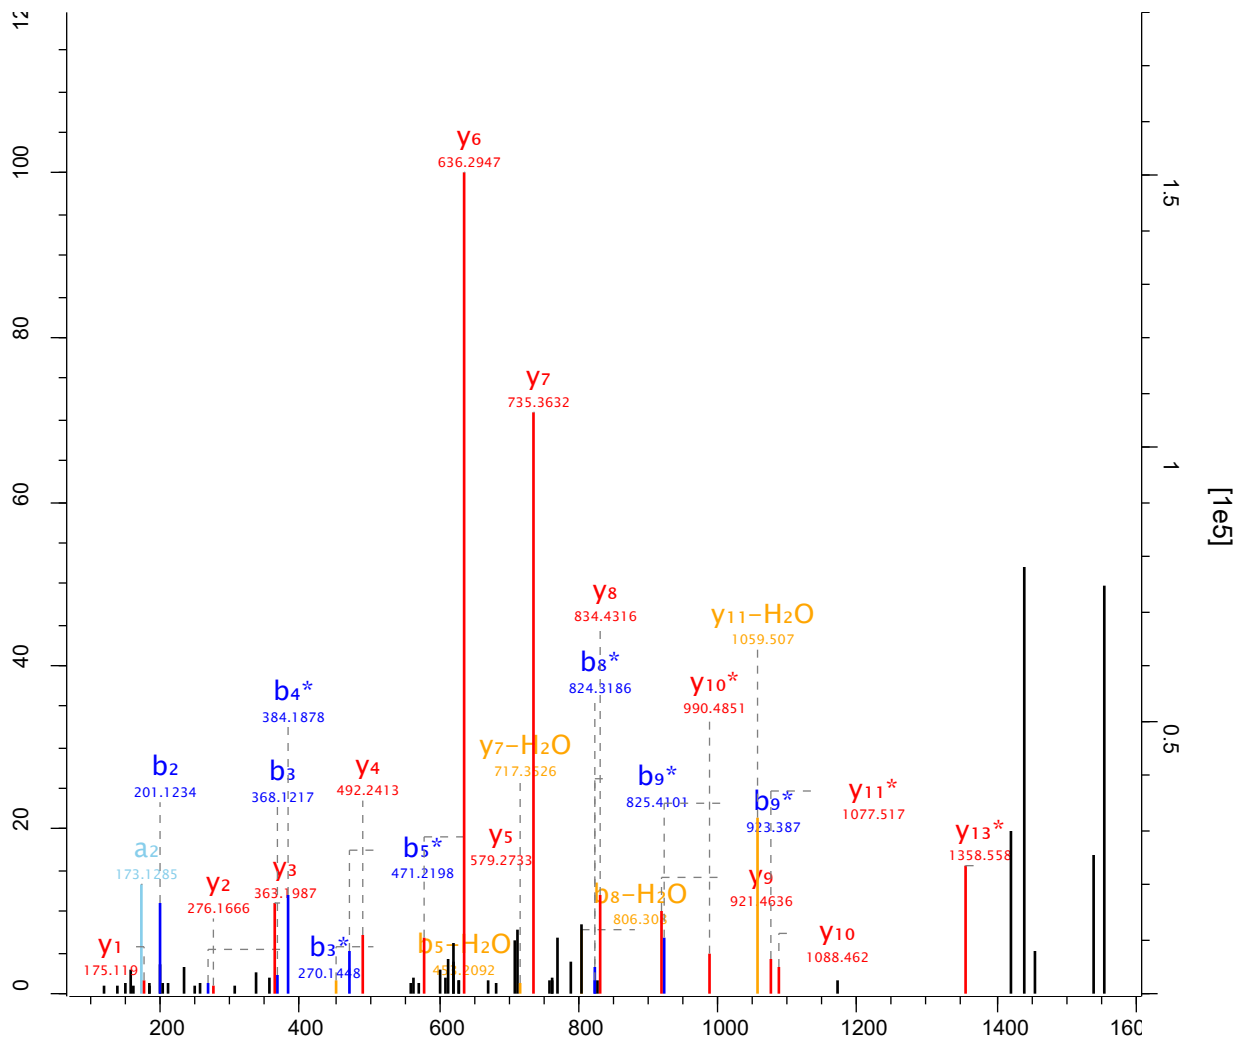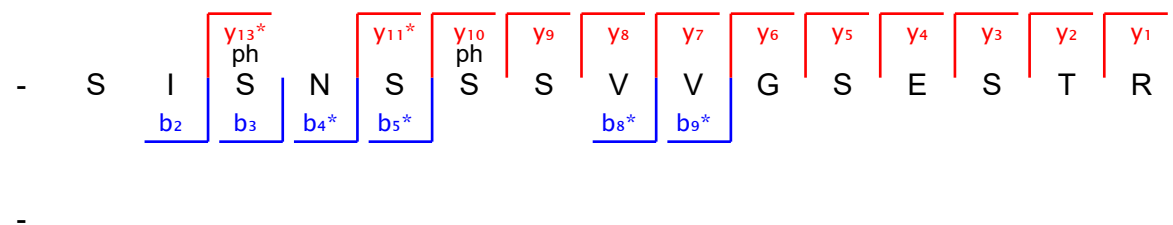

Raw file Scan Method Score m/z  
 sys\_15\_1 18582 FTMS; HCD 53.24 481.75

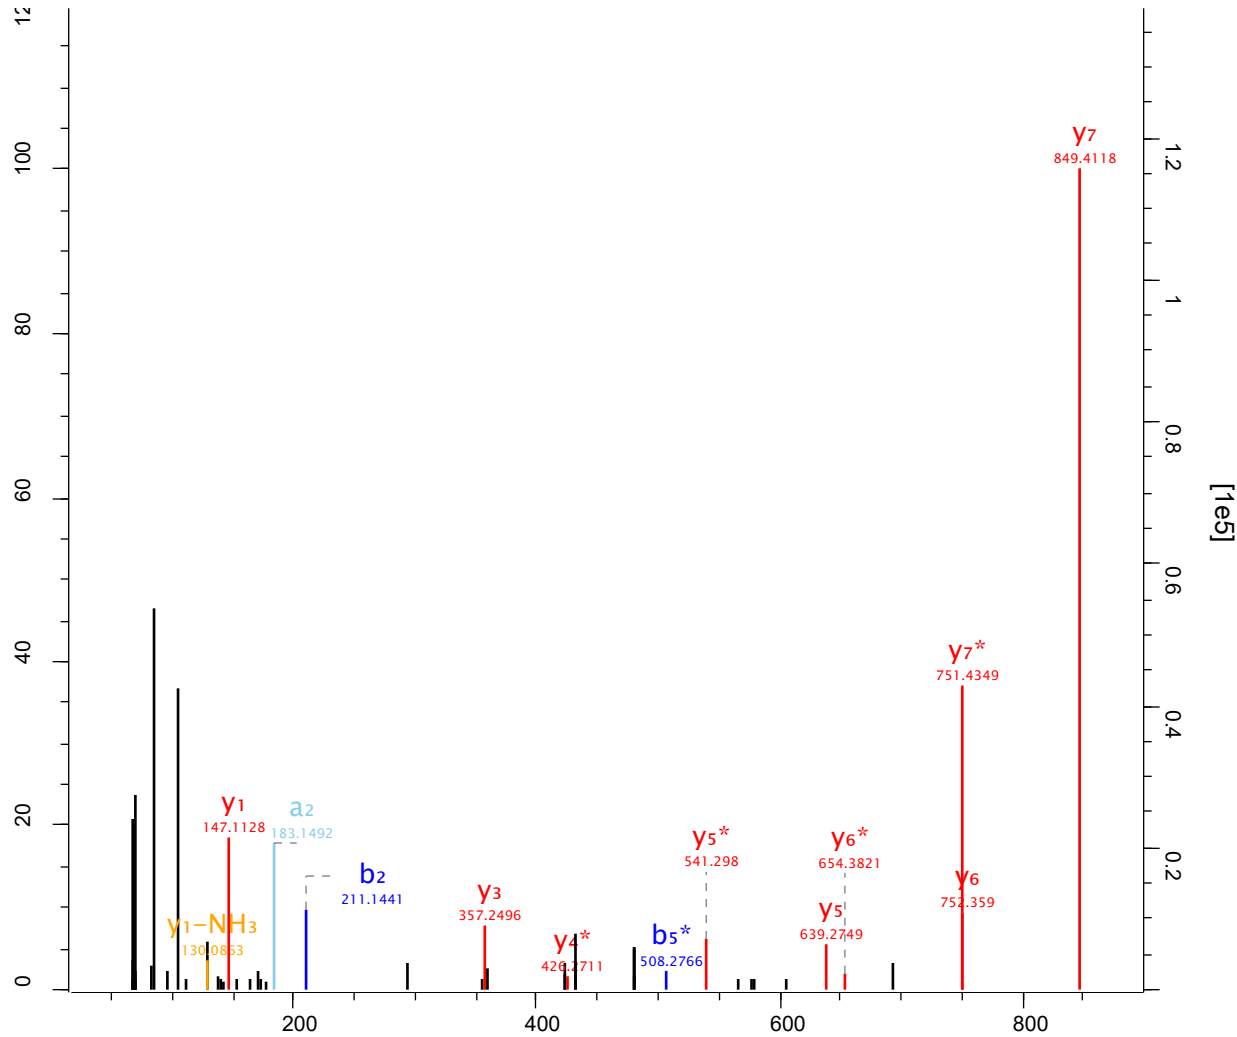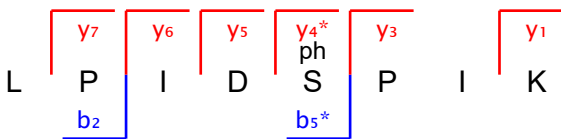

Raw file Scan Method Score m/z  
 sys\_15\_1 18646 FTMS; HCD 286.81 835.32

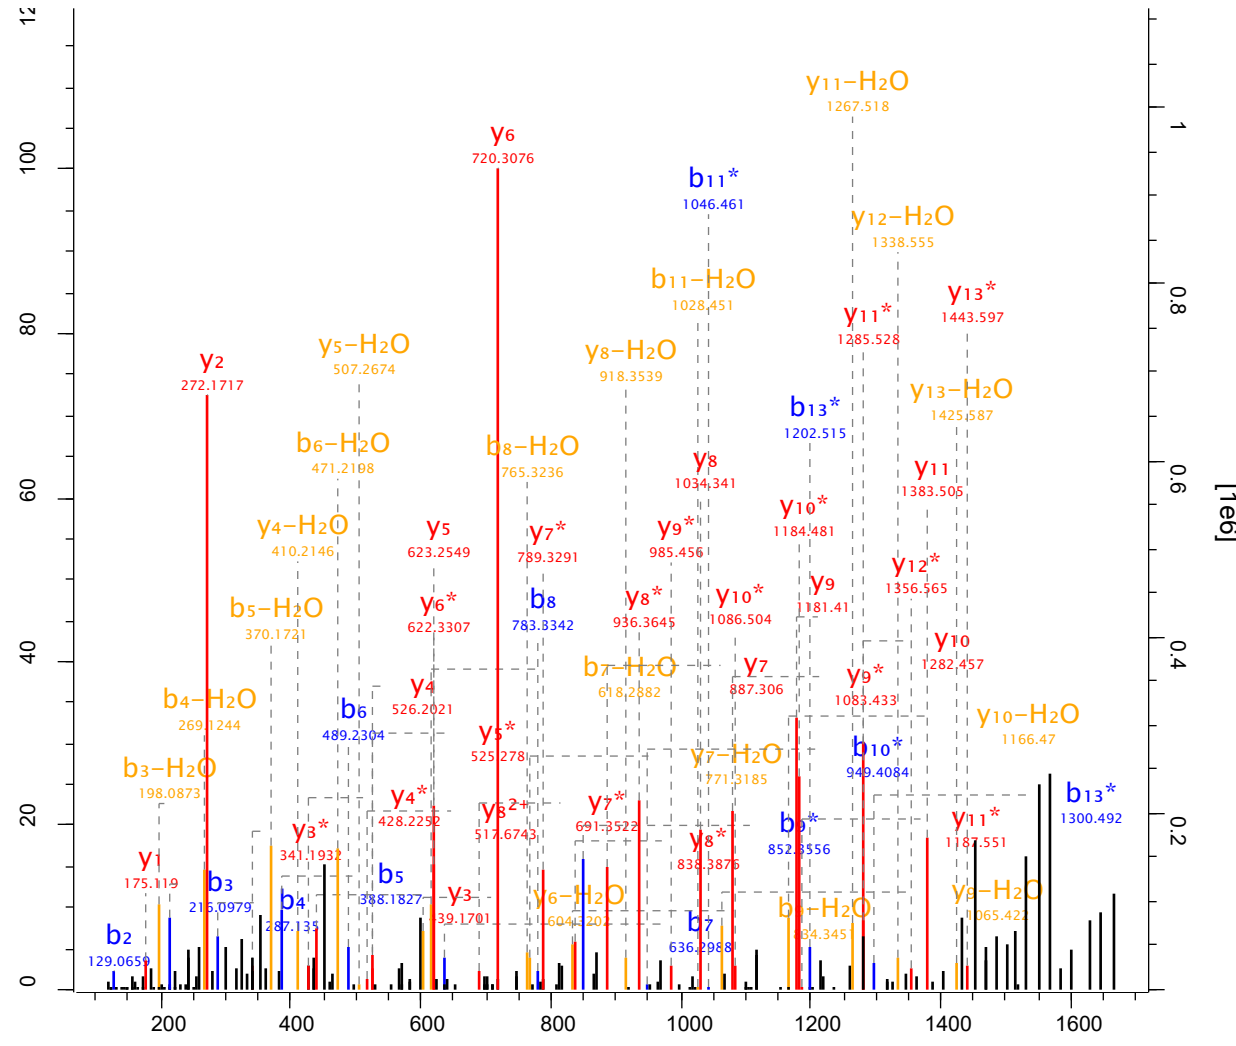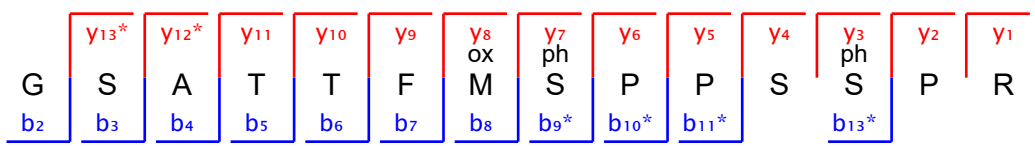



Raw file Scan Method Score m/z  
 sys\_15\_1 18746 FTMS; HCD 46.42 1003.38

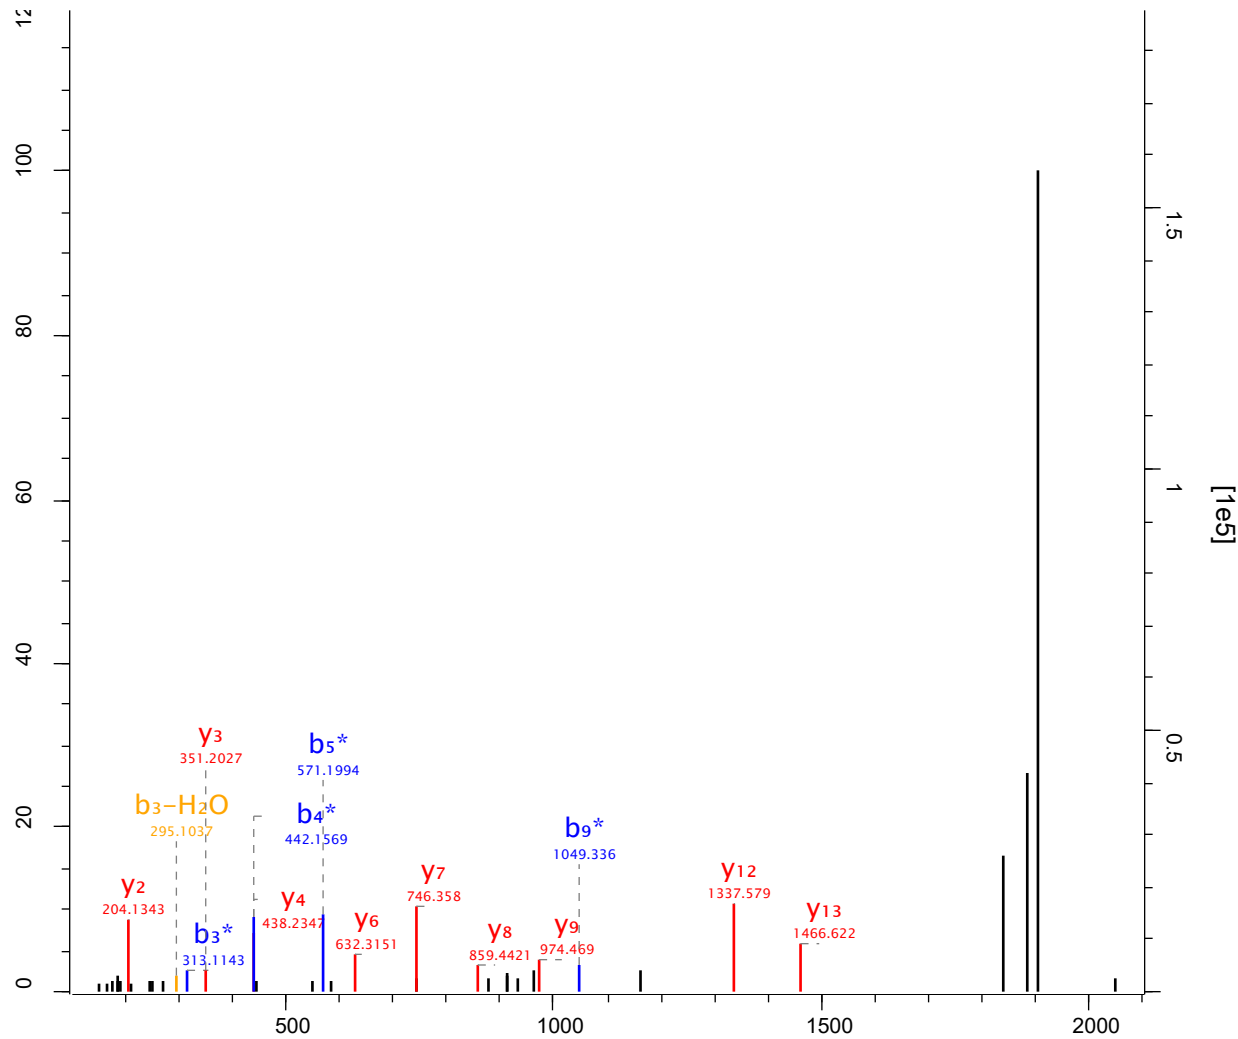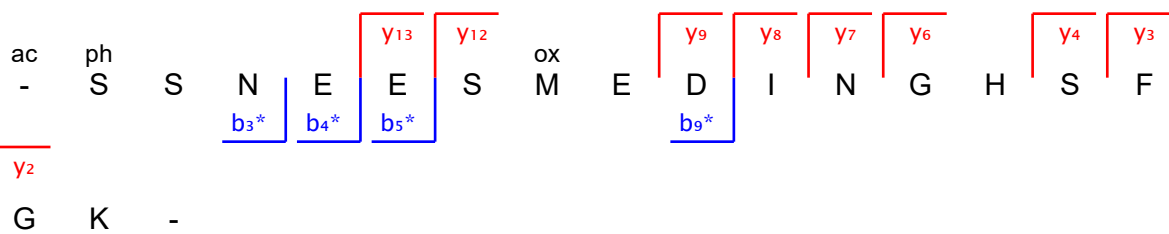

Raw file Scan Method Score m/z  
 sys\_15\_1 18776 FTMS; HCD 107.35 708.28

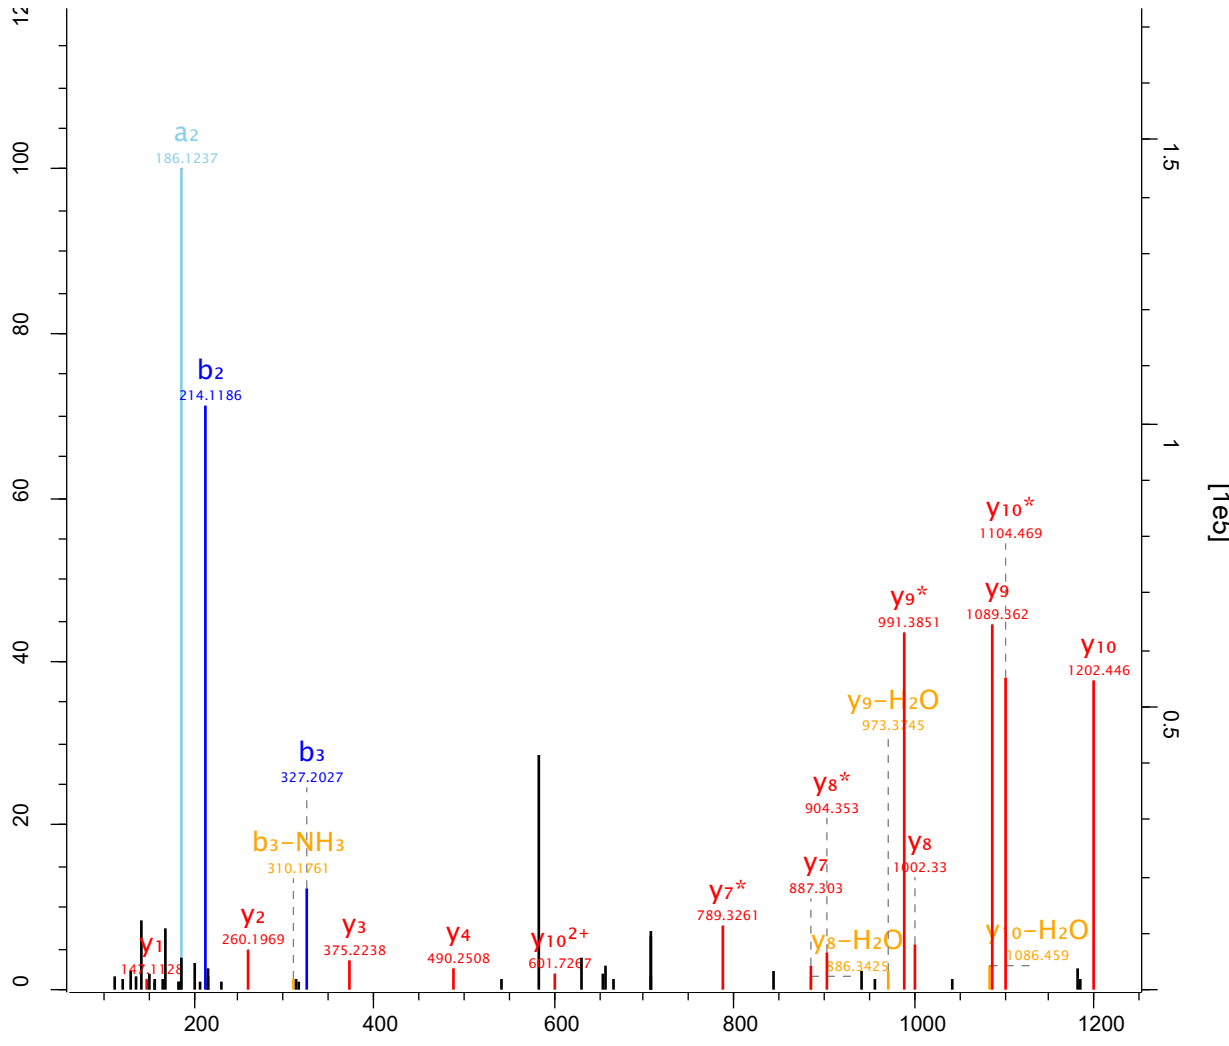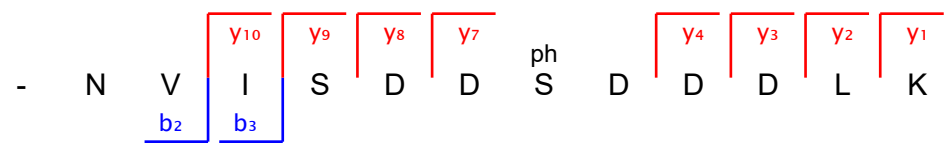

Raw file Scan Method Score m/z  
 sys\_15\_1 18830 FTMS; HCD 193.45 652.27

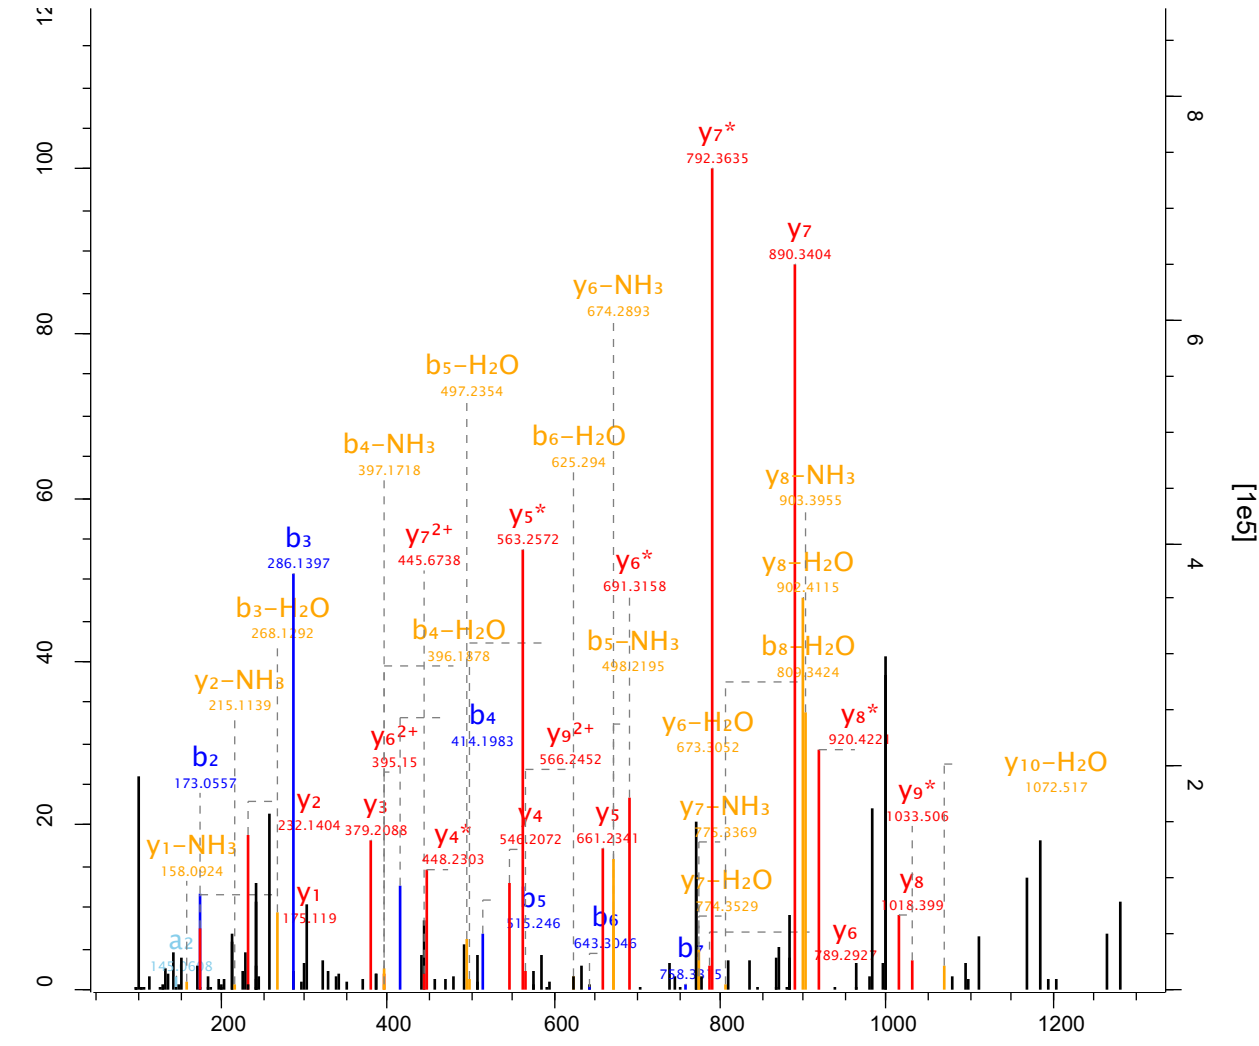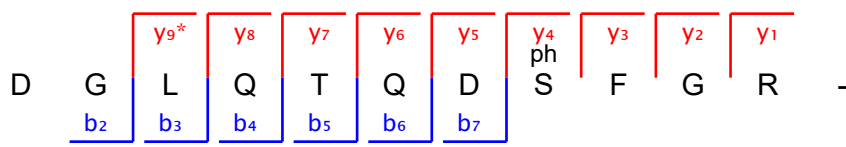

Raw file Scan Method Score m/z  
 sys\_15\_1 18840 FTMS; HCD 103.83 667.29

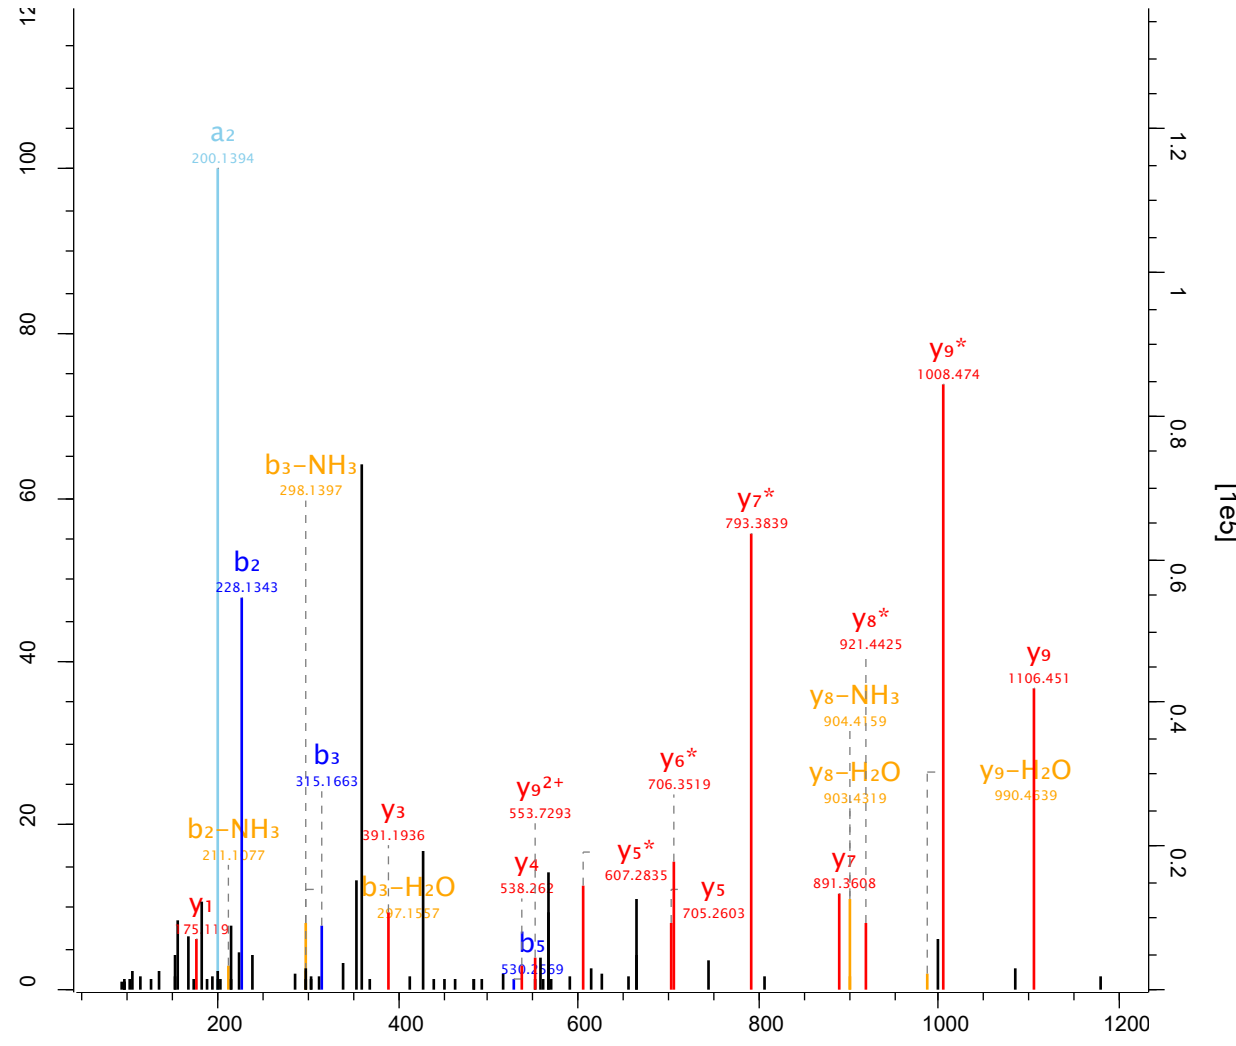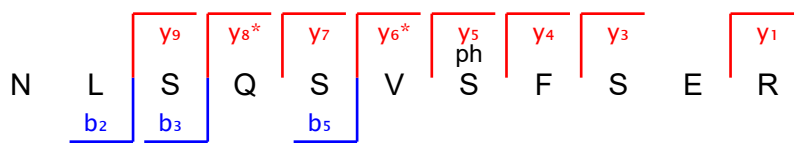

Raw file Scan Method Score m/z  
 sys\_15\_1 18844 FTMS; HCD 140.77 624.31

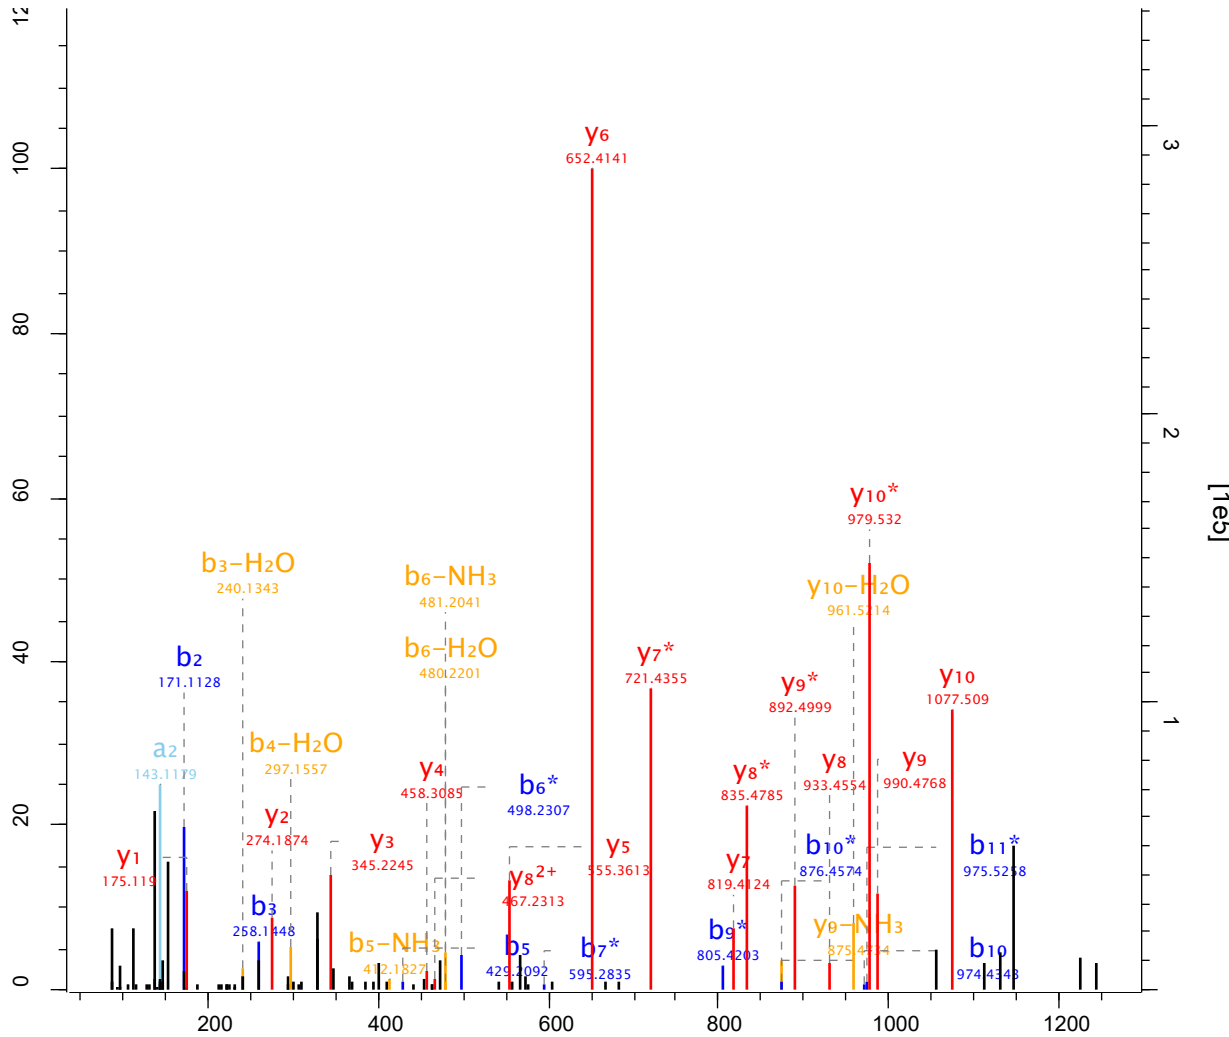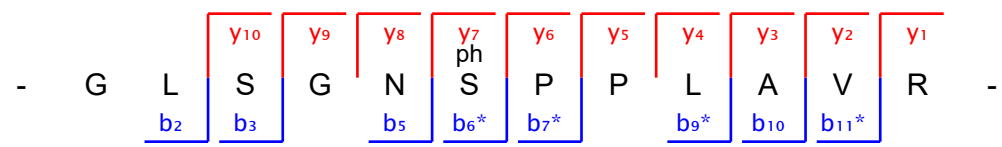

Raw file Scan Method Score m/z  
 sys\_15\_1 18956 FTMS; HCD 136.92 739.65

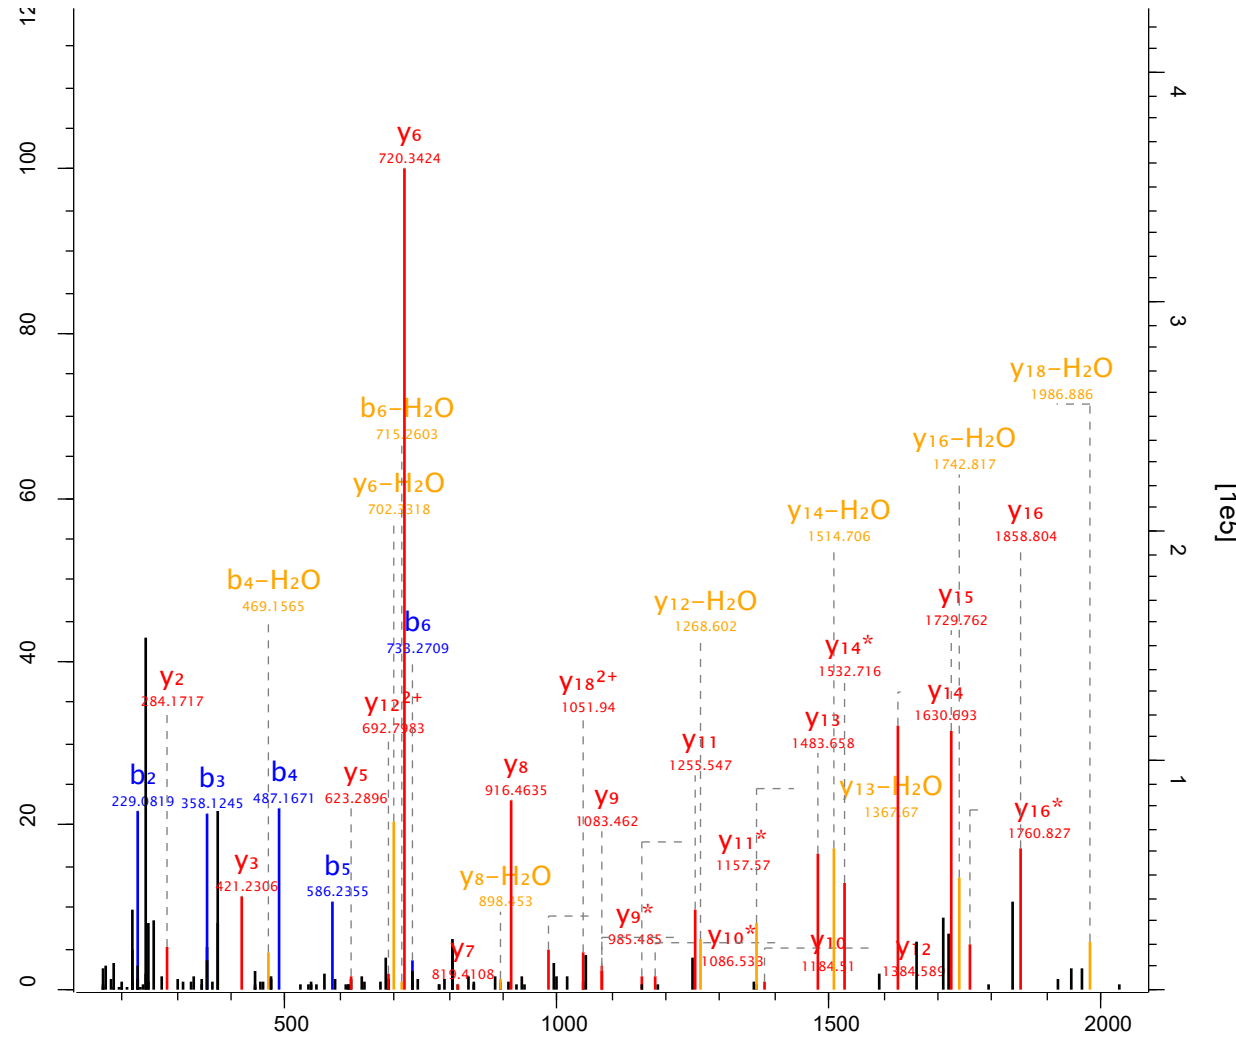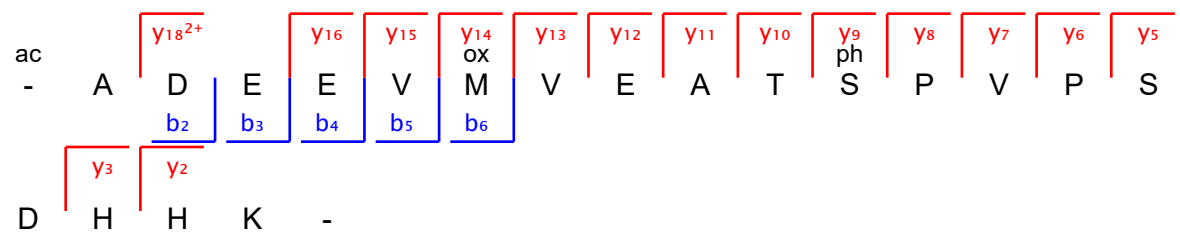

Raw file Scan Method Score m/z  
 sys\_15\_1 19027 FTMS; HCD 51.29 542.76

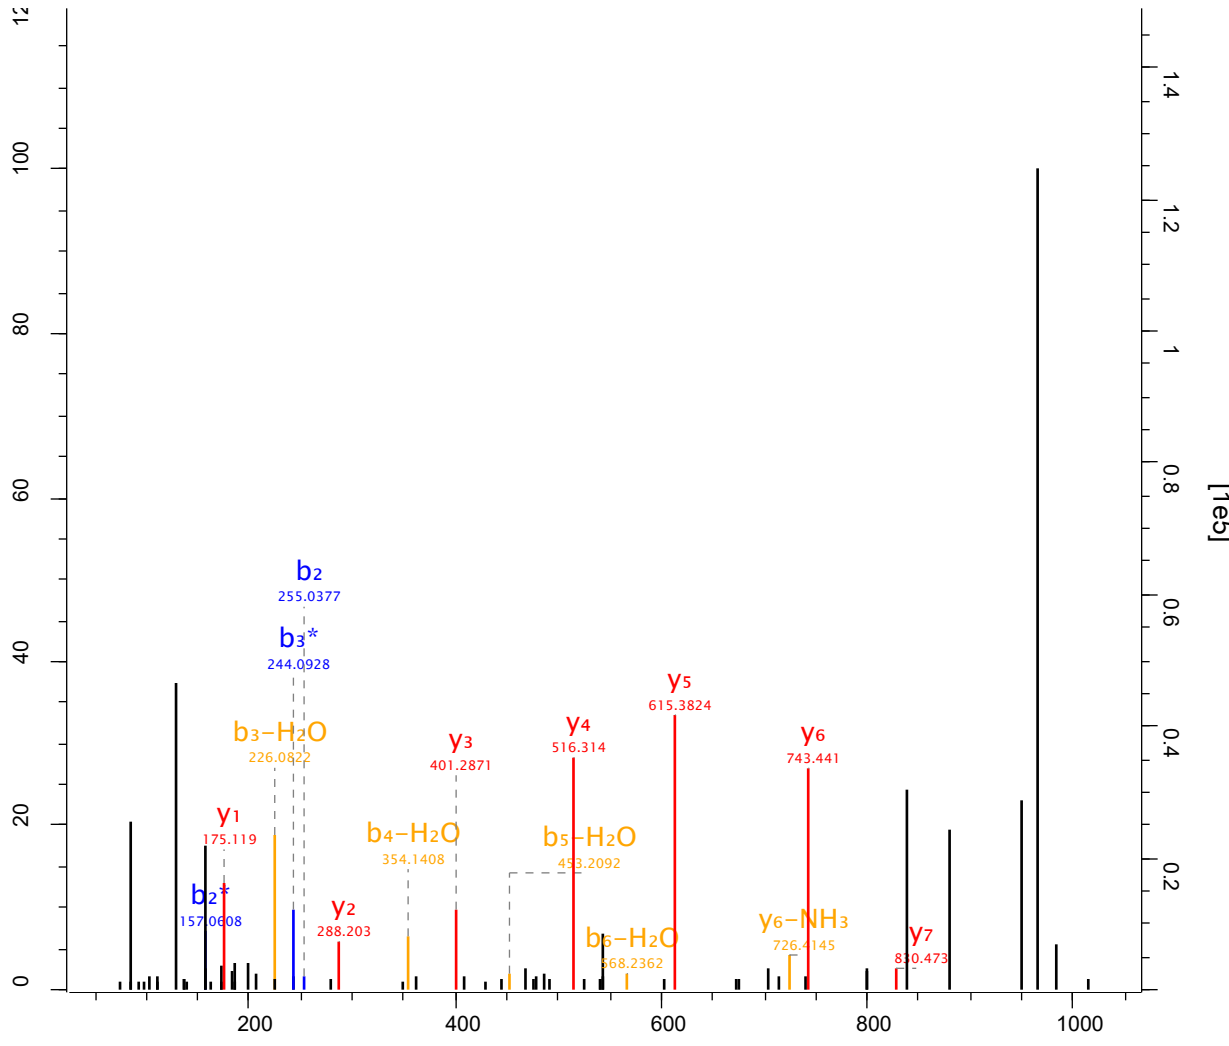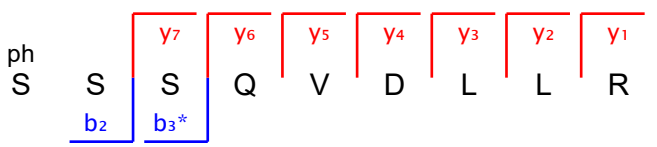

Raw file Scan Method Score m/z  
 sys\_15\_1 19043 FTMS; HCD 219.41 645.32

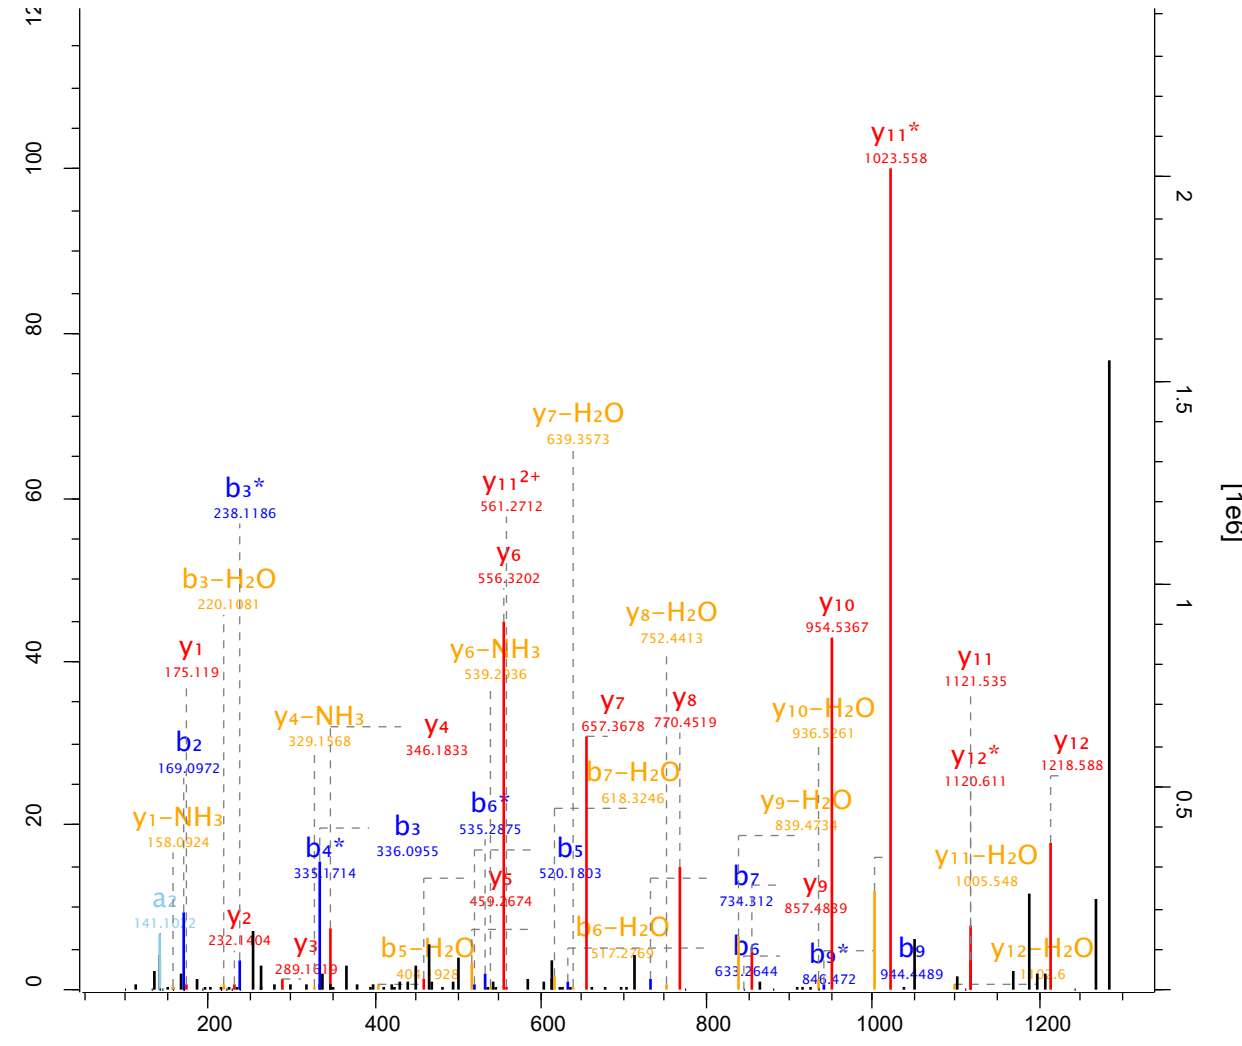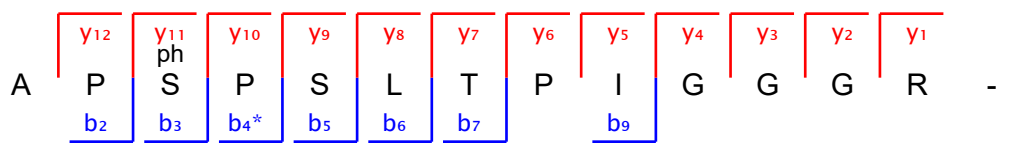



Raw file Scan Method Score m/z  
 sys\_15\_1 19057 FTMS; HCD 70.2 503.91

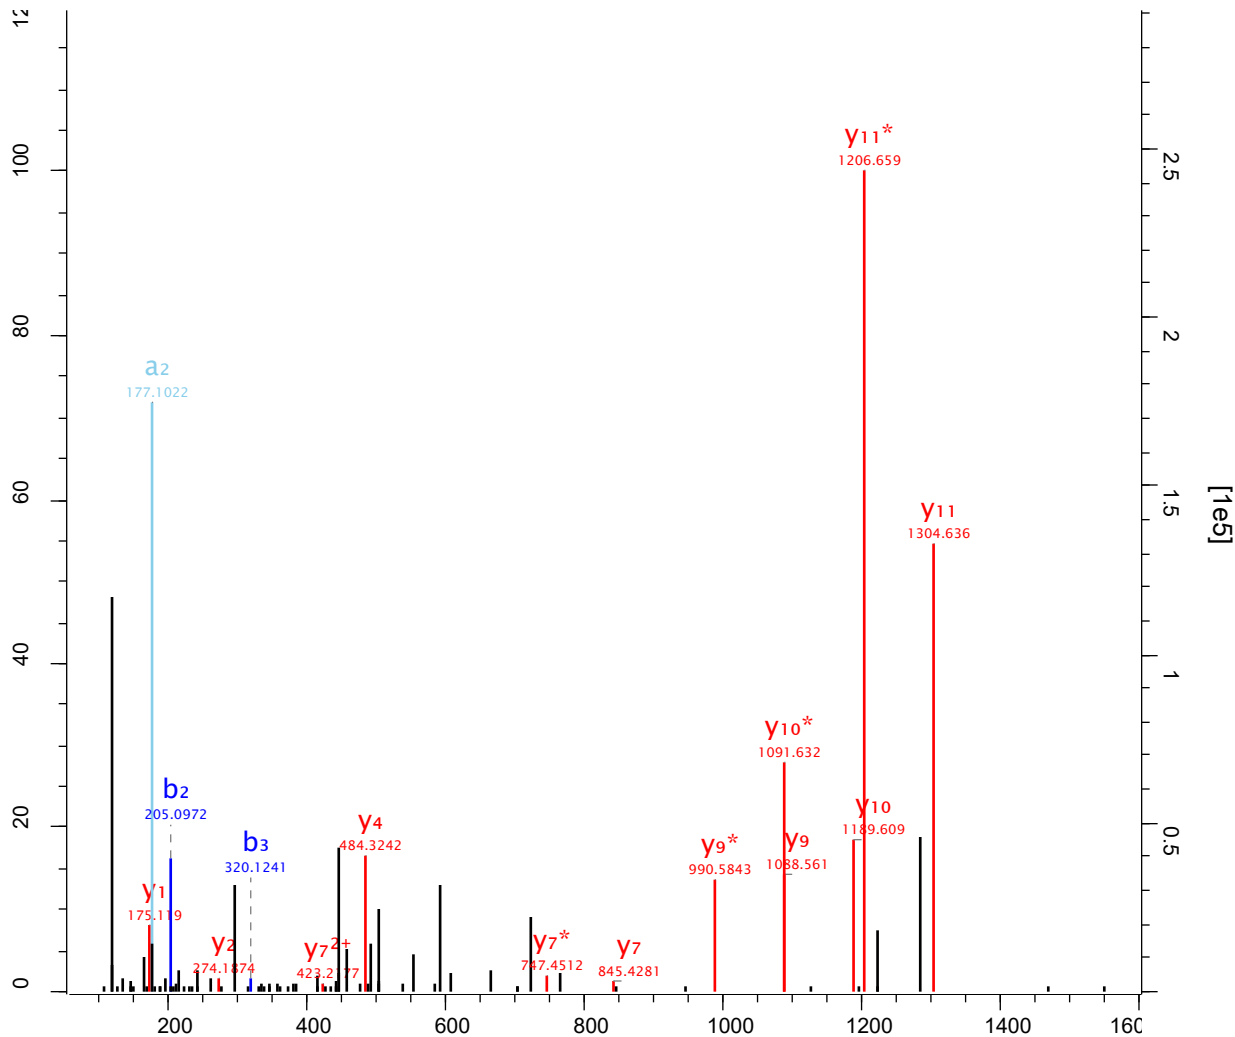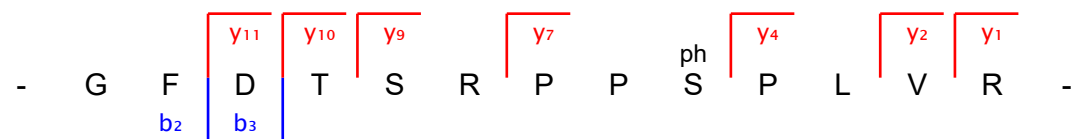

Raw file Scan Method Score m/z  
 sys\_15\_1 19091 FTMS; HCD 109.07 626.81

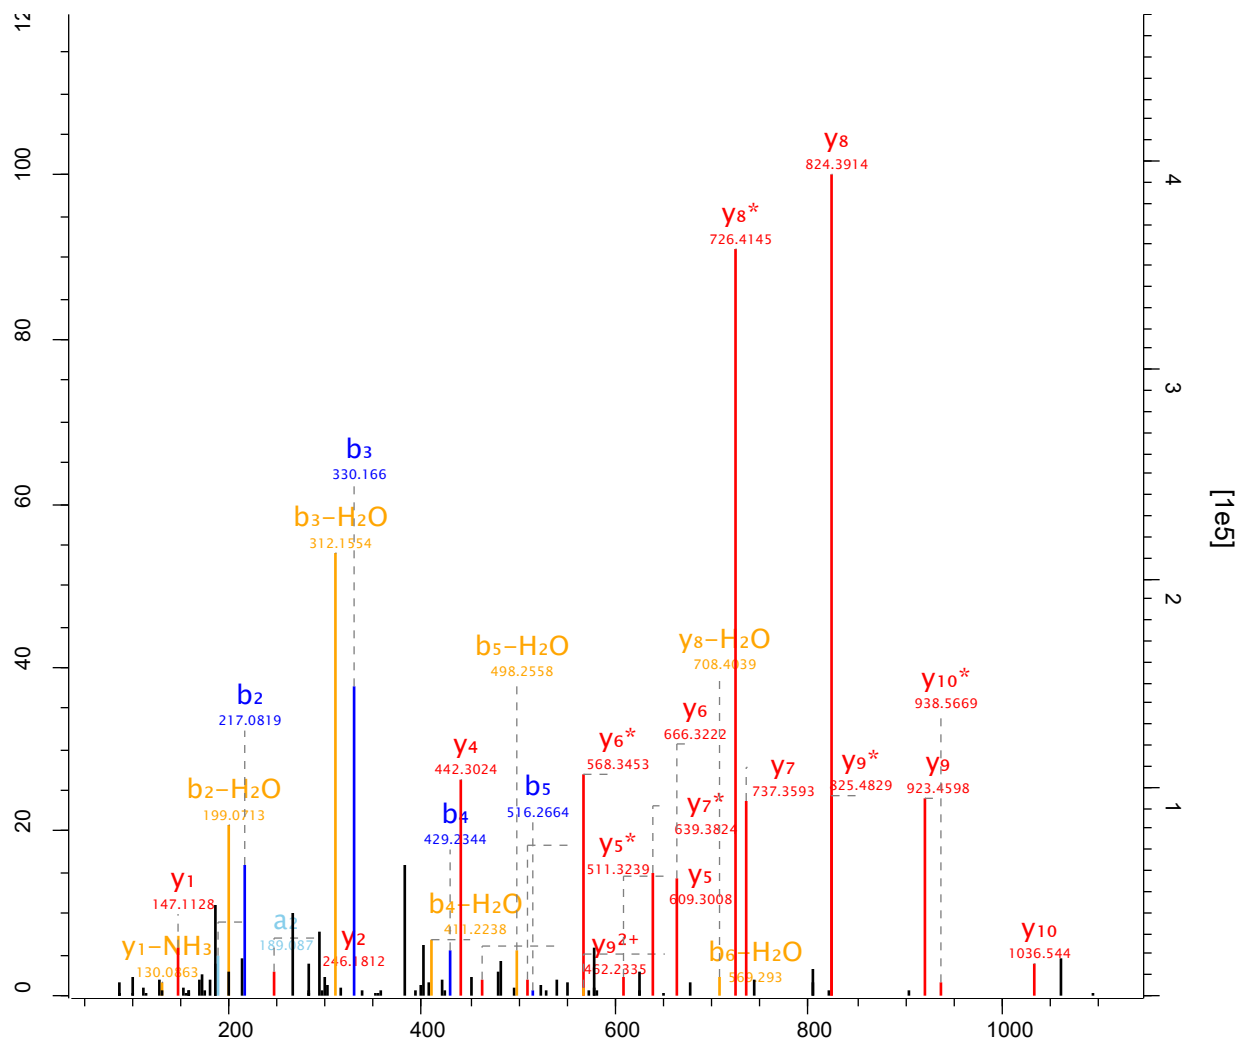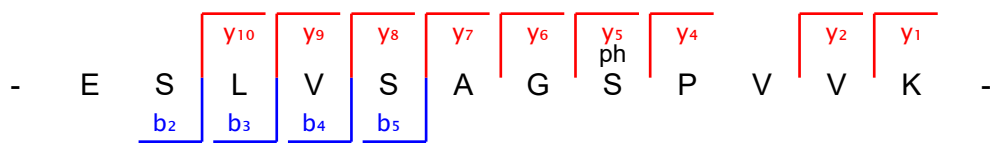

Raw file Scan Method Score m/z  
 sys\_15\_1 19198 FTMS; HCD 63.22 670.01

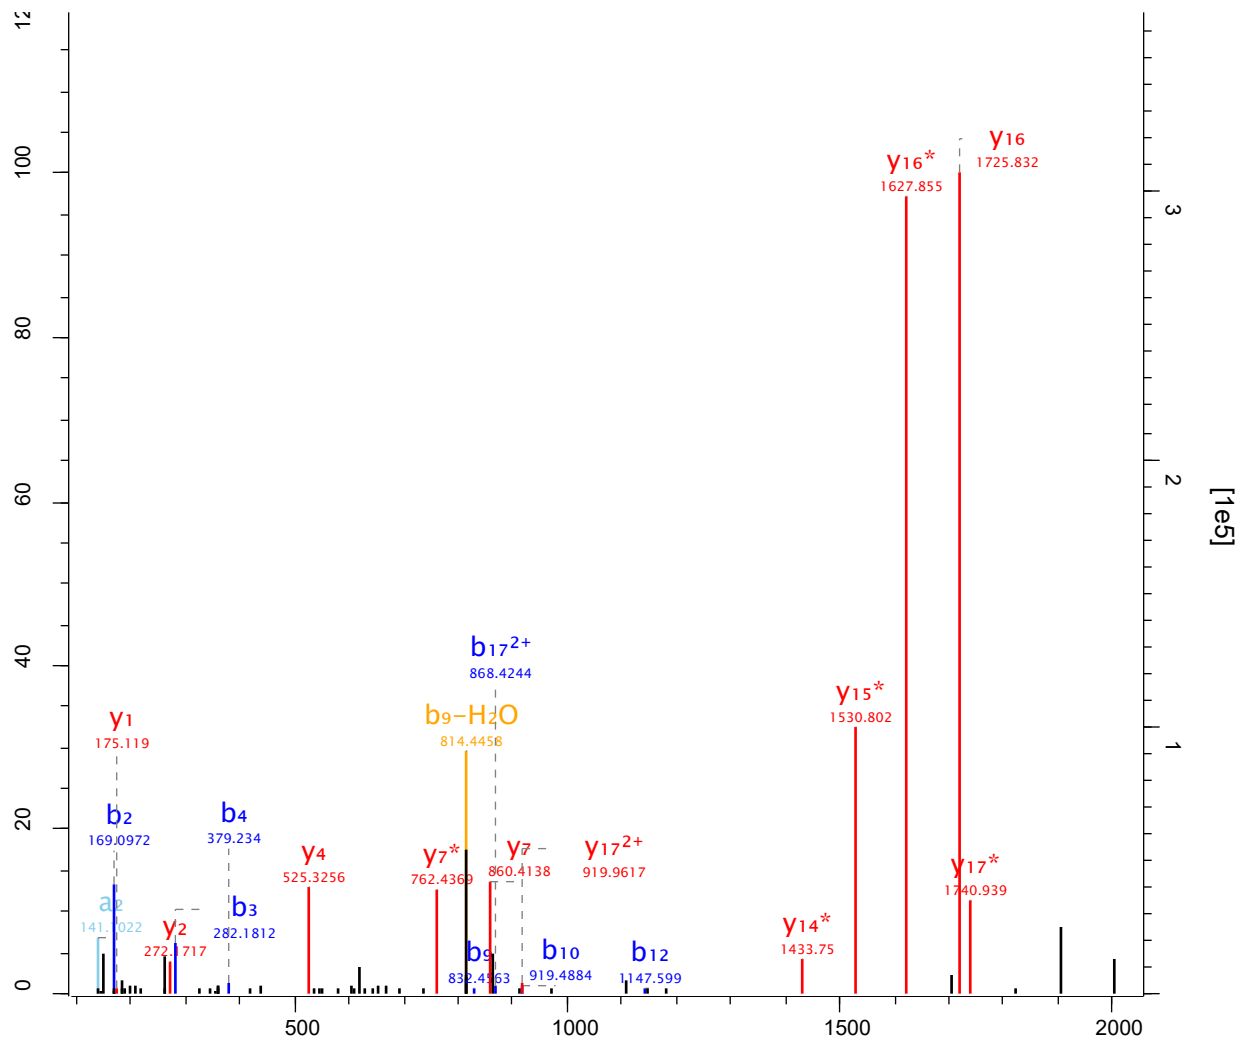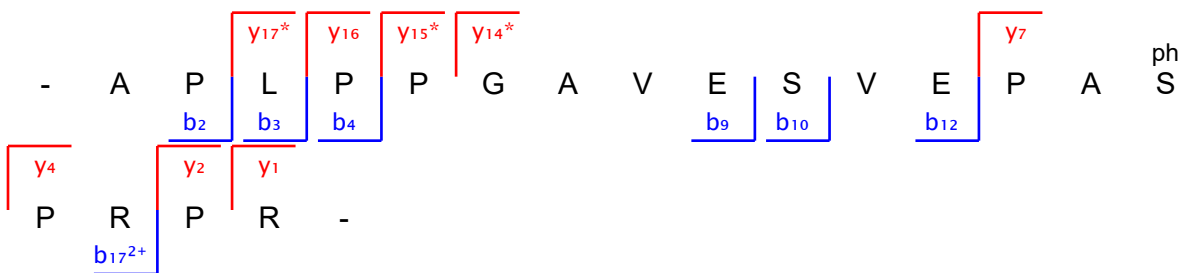

Raw file Scan Method Score m/z  
 sys\_15\_1 19204 FTMS; HCD 110.26 544.57

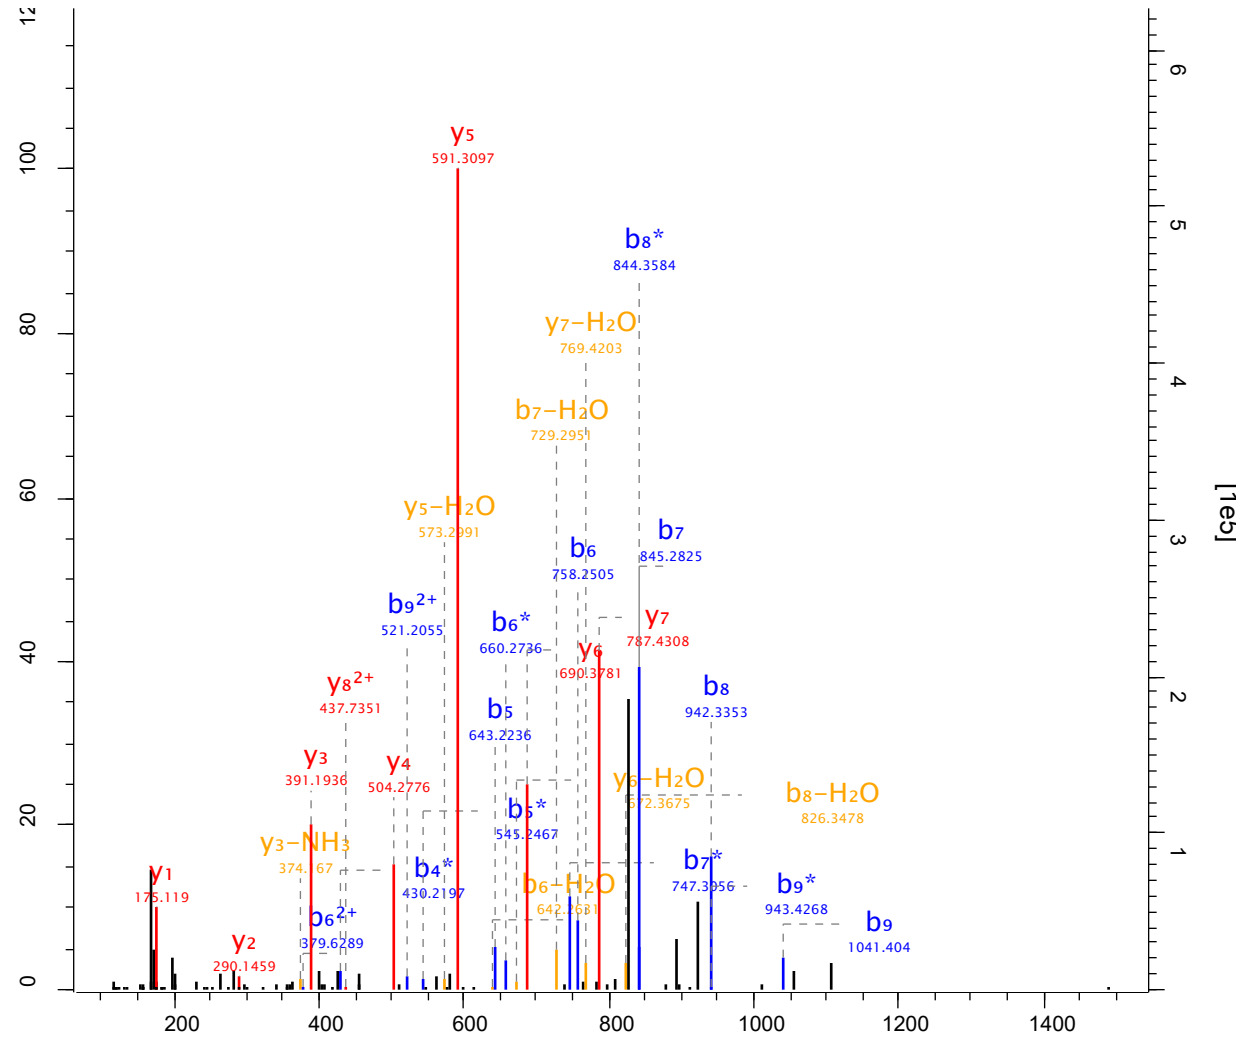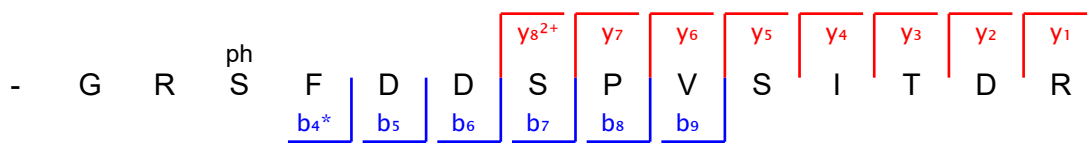

Raw file Scan Method Score m/z  
 sys\_15\_1 19254 FTMS; HCD 63.98 822.28

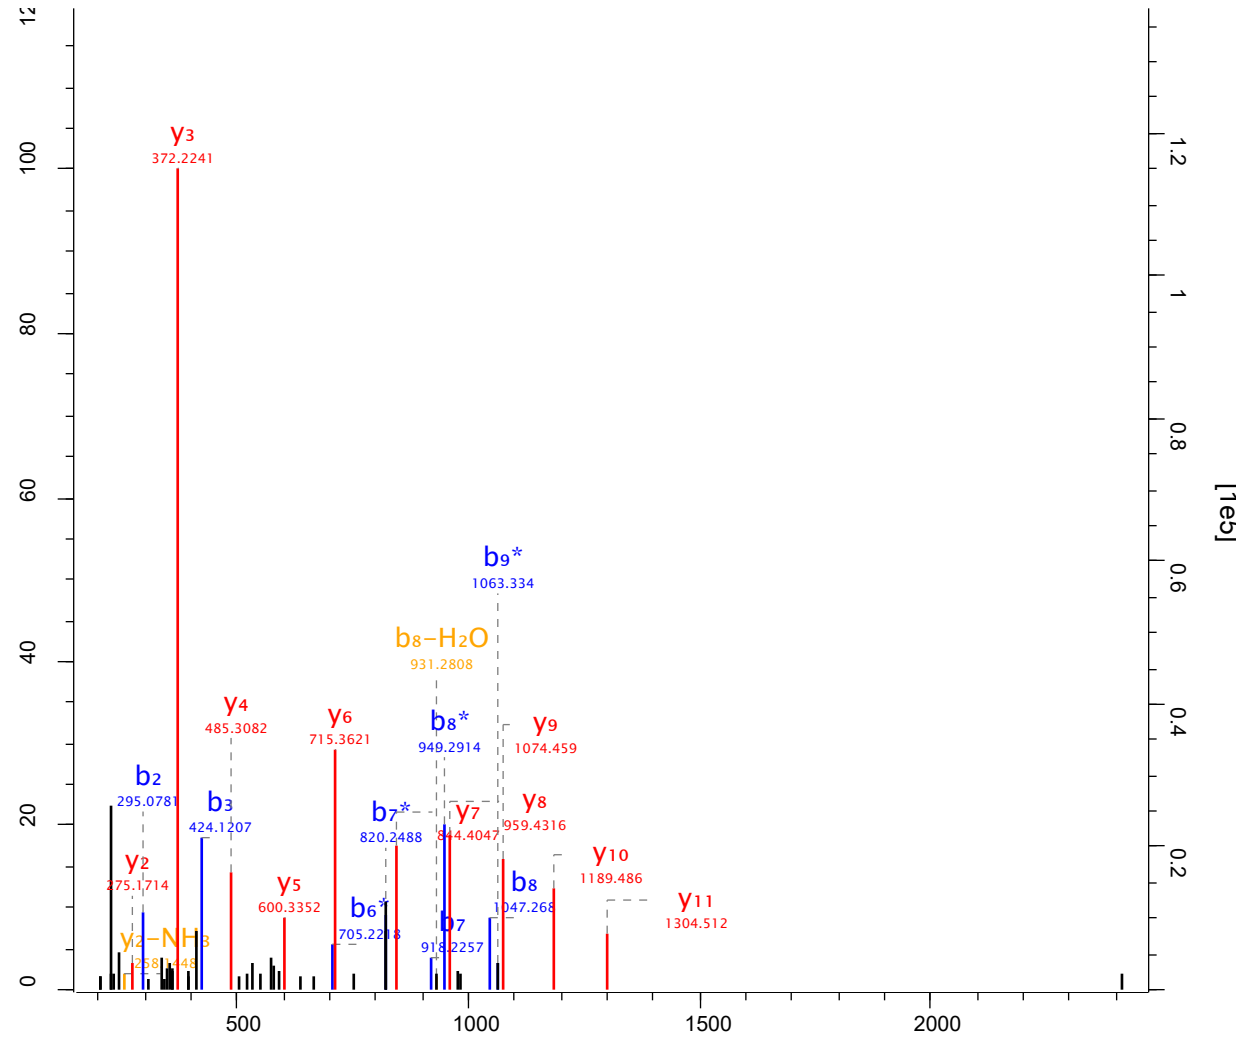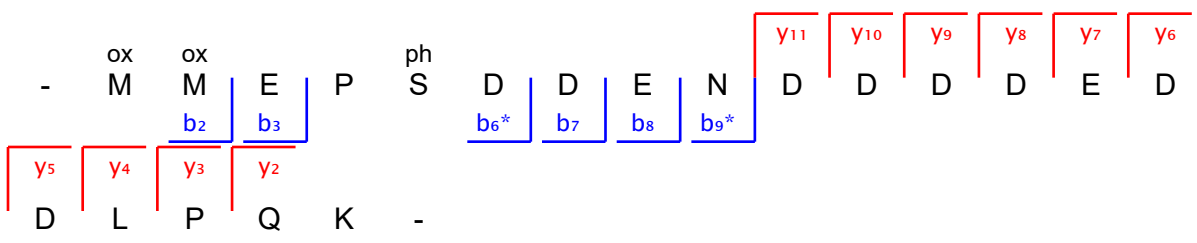

Raw file Scan Method Score m/z  
 sys\_15\_1 19271 FTMS; HCD 194.24 1031.42

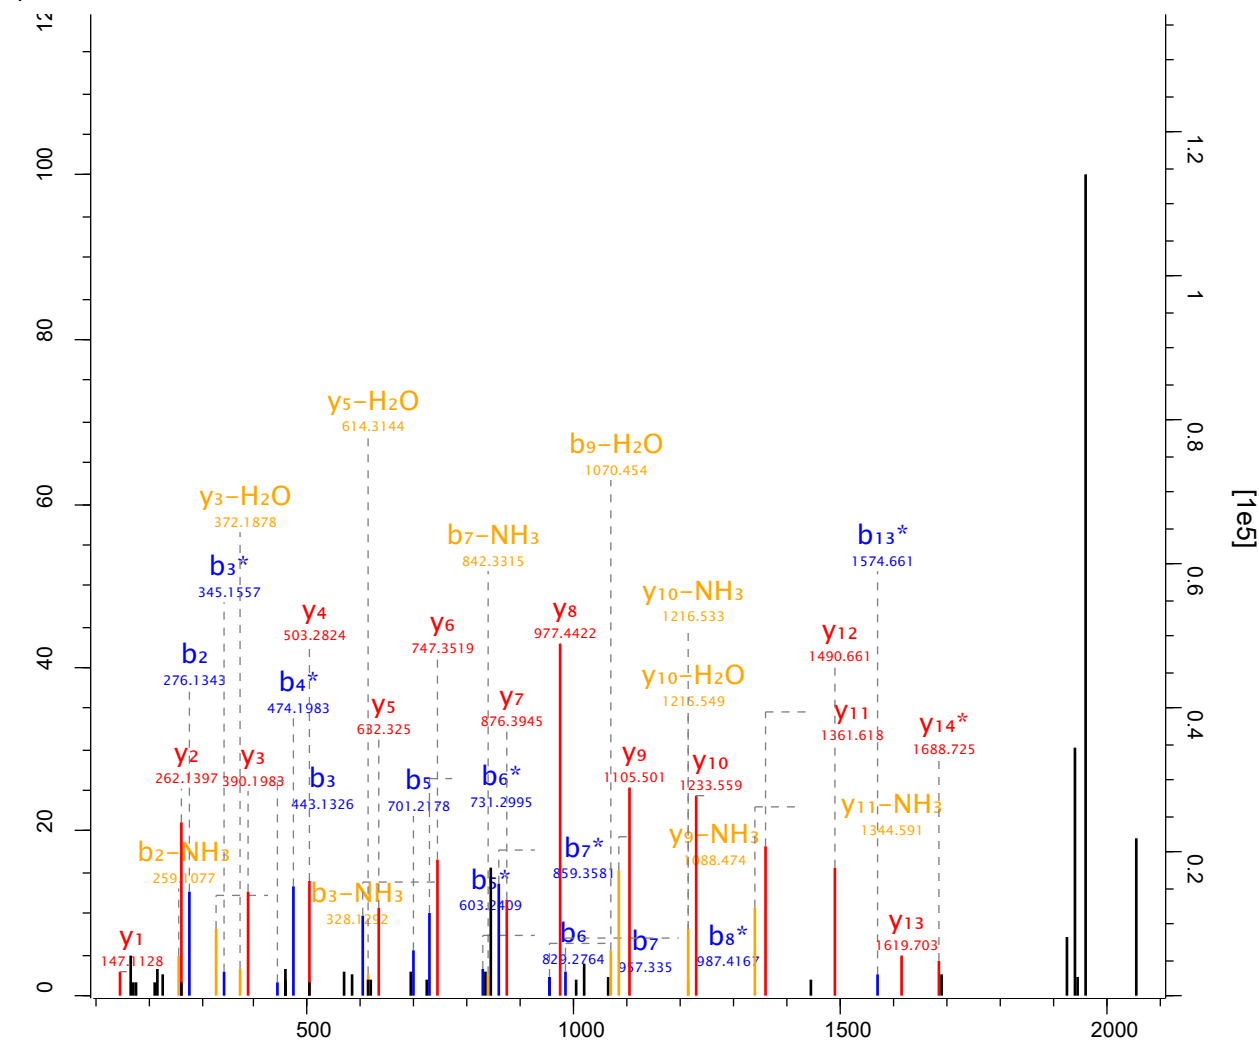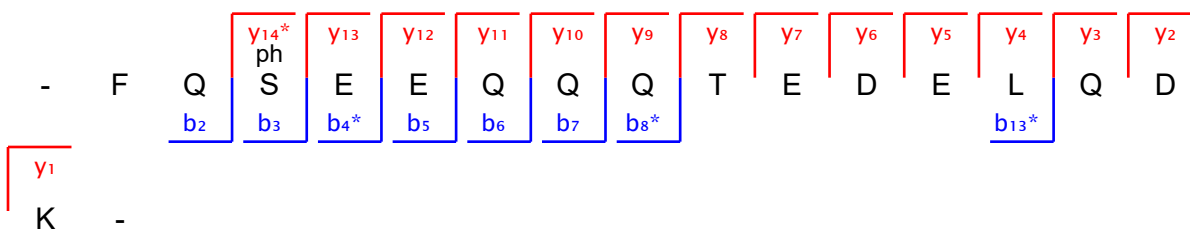

Raw file Scan Method Score m/z  
 sys\_15\_1 19278 FTMS; HCD 166.3 769.37

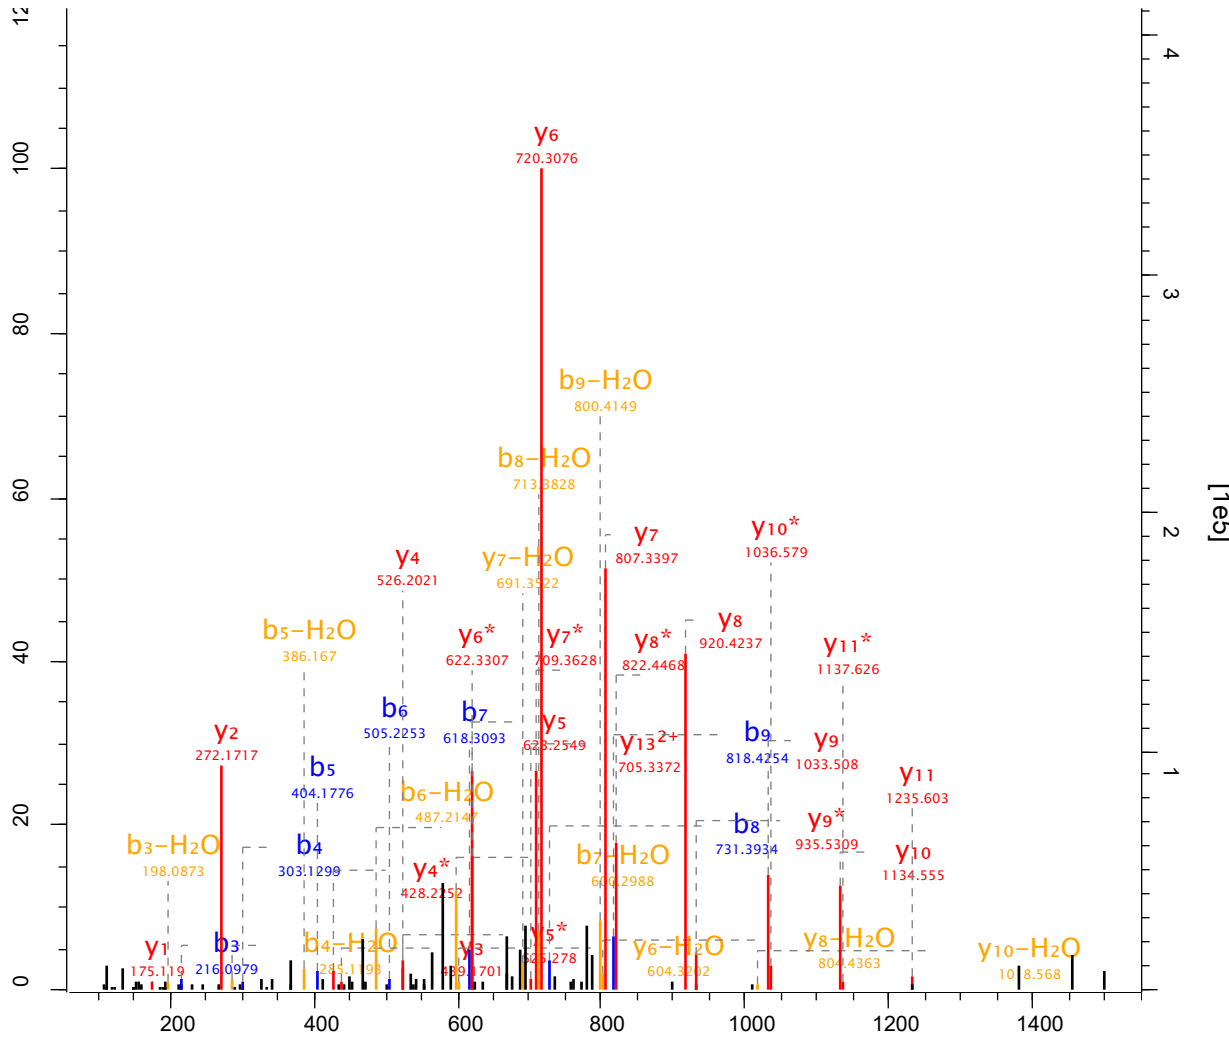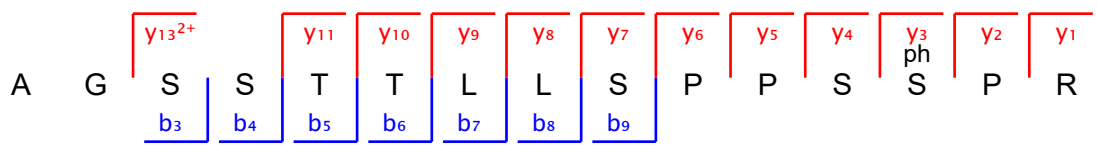

Raw file Scan Method Score m/z  
 sys\_15\_1 19283 FTMS; HCD 47.55 703.28

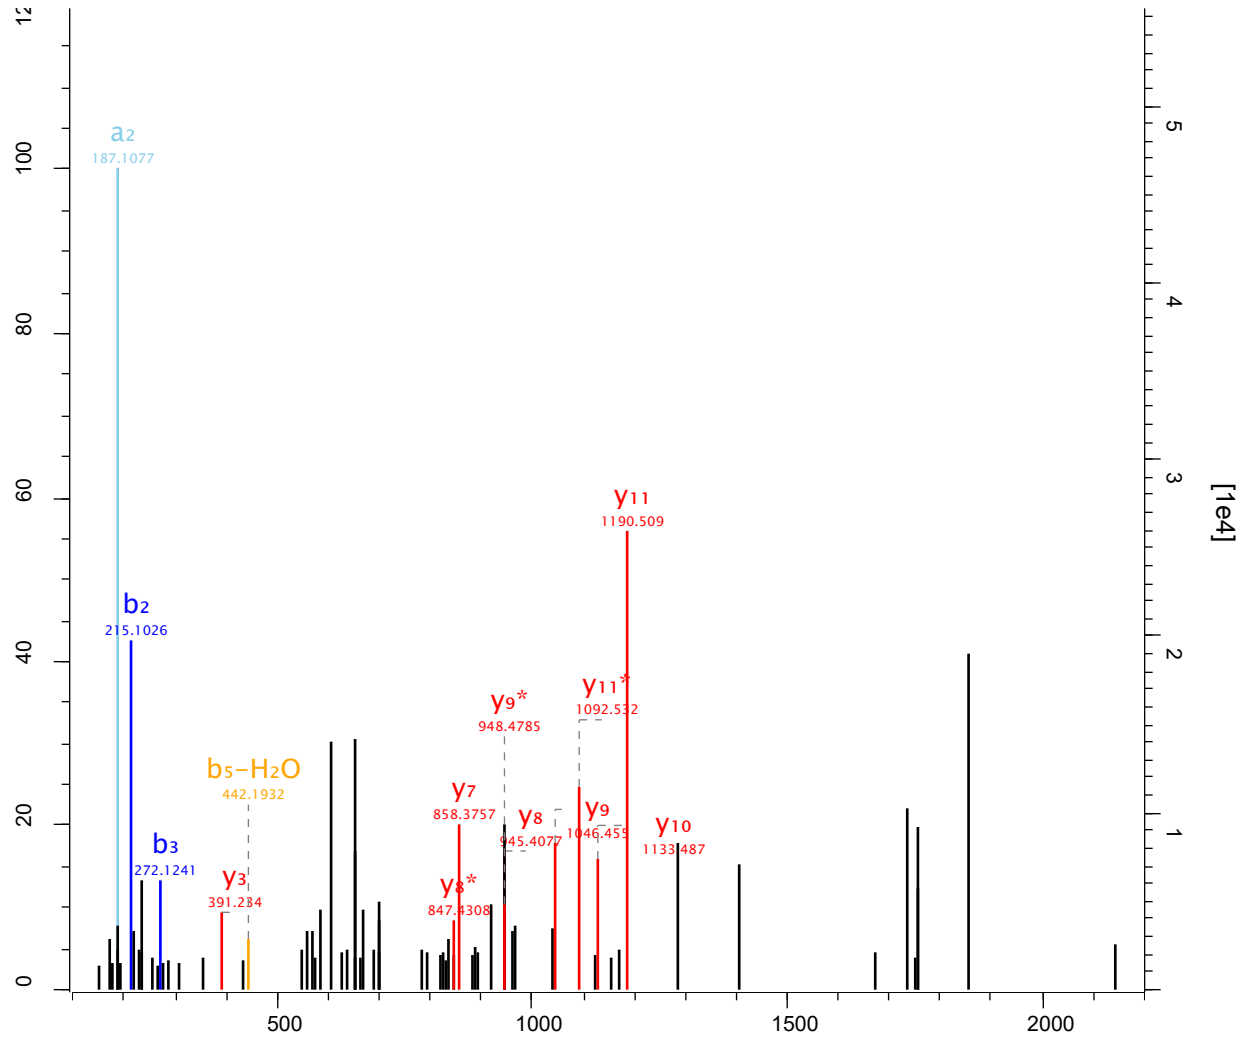

- D V G S T S S N V S P F K -

Fragmentation labels: b2 (under DV), b3 (under VG), y11 (over VG), y10 (over GS), y9 (over TS), y8 (over SS), y7 (over Sph), y3 (over SP).



Raw file Scan Method Score m/z  
 sys\_15\_1 19329 FTMS; HCD 133.16 650.26

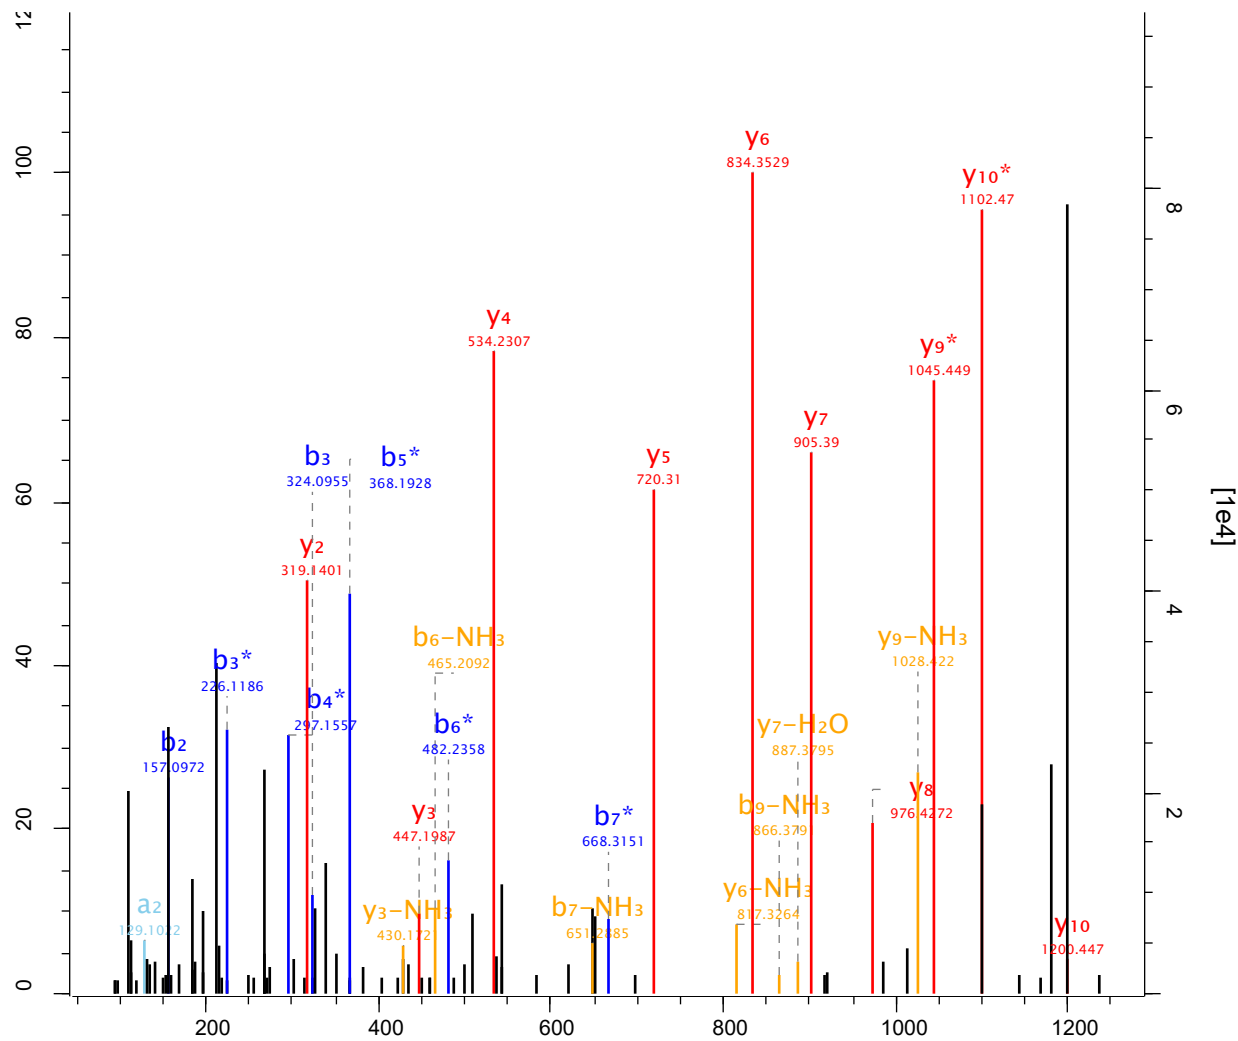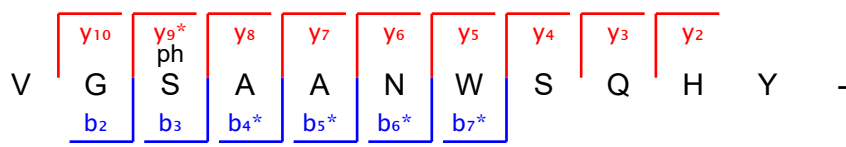

| Raw file | Scan | Method    | Score | m/z    |
|----------|------|-----------|-------|--------|
| sys_15_1 | 1935 | FTMS; HCD | 57.59 | 437.18 |

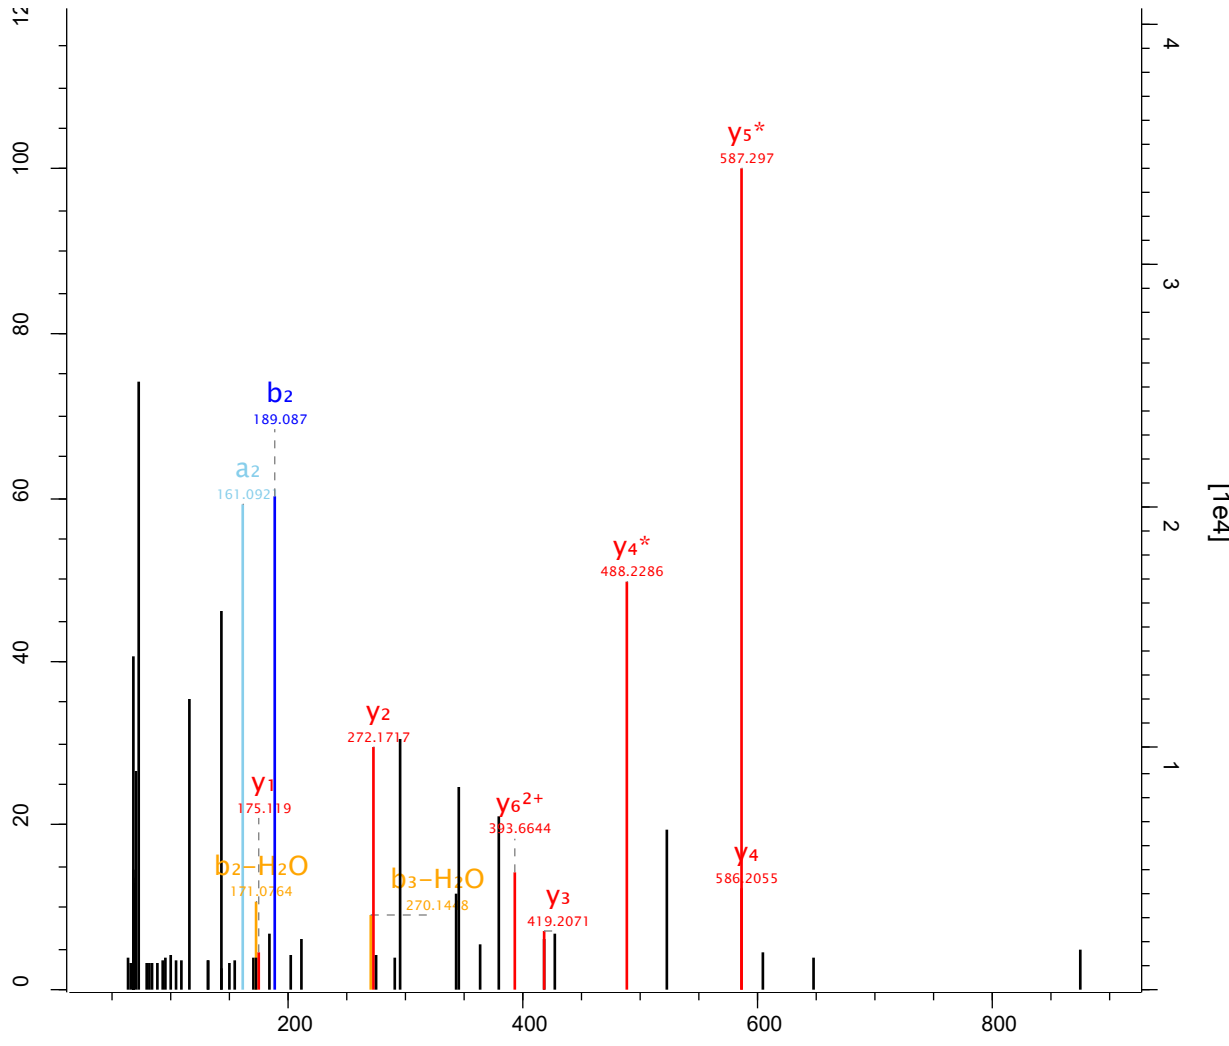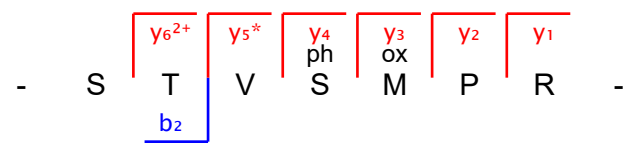

Raw file Scan Method Score m/z  
 sys\_15\_1 19441 FTMS; HCD 41.24 628.25

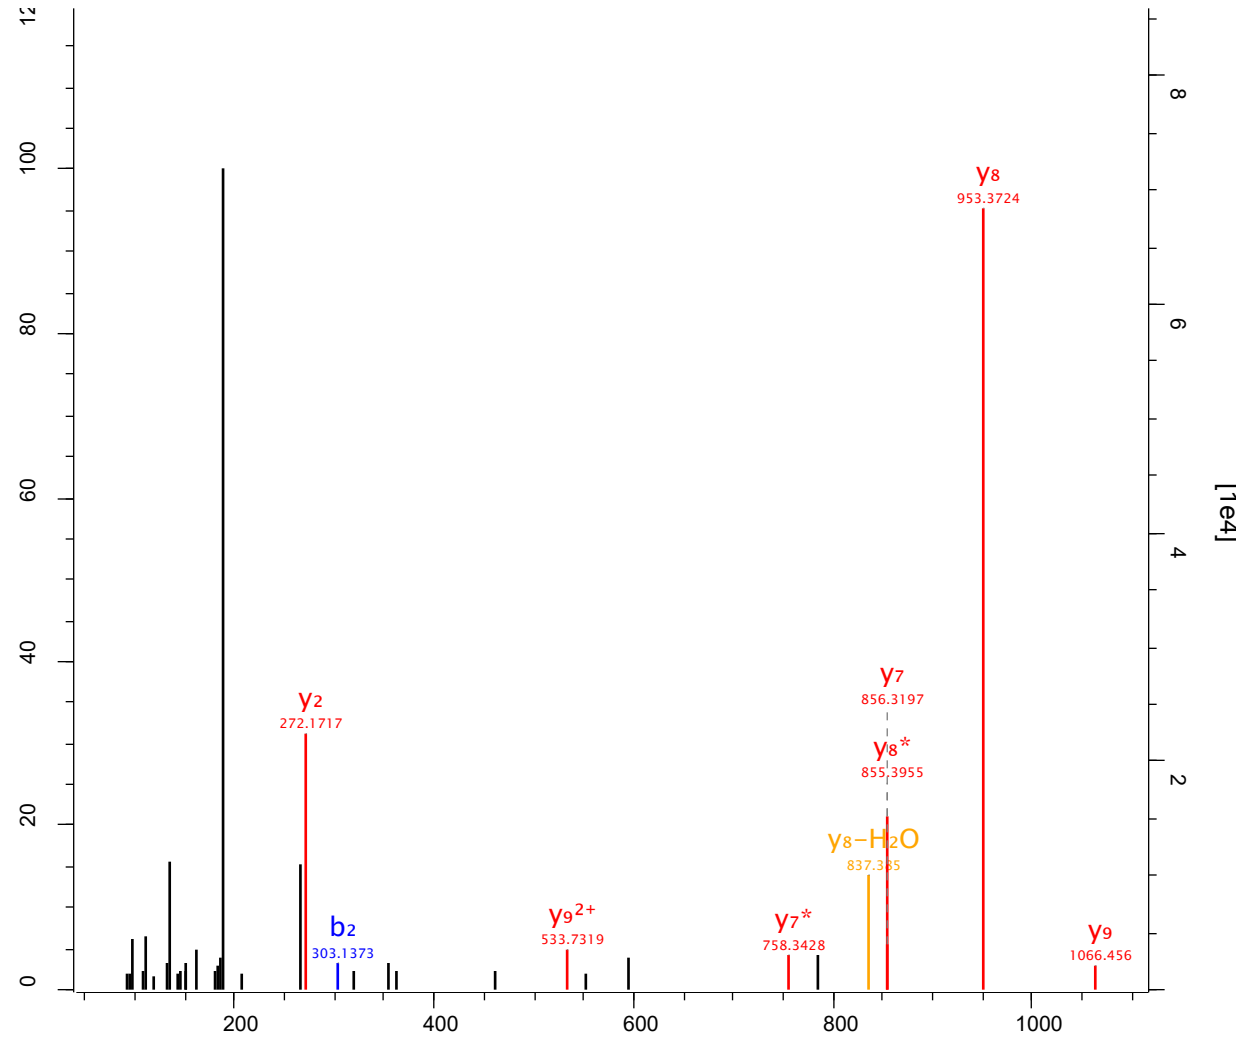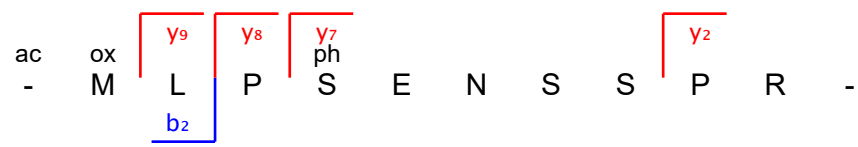

Raw file Scan Method Score m/z  
 sys\_15\_1 19541 FTMS; HCD 63.91 740.29

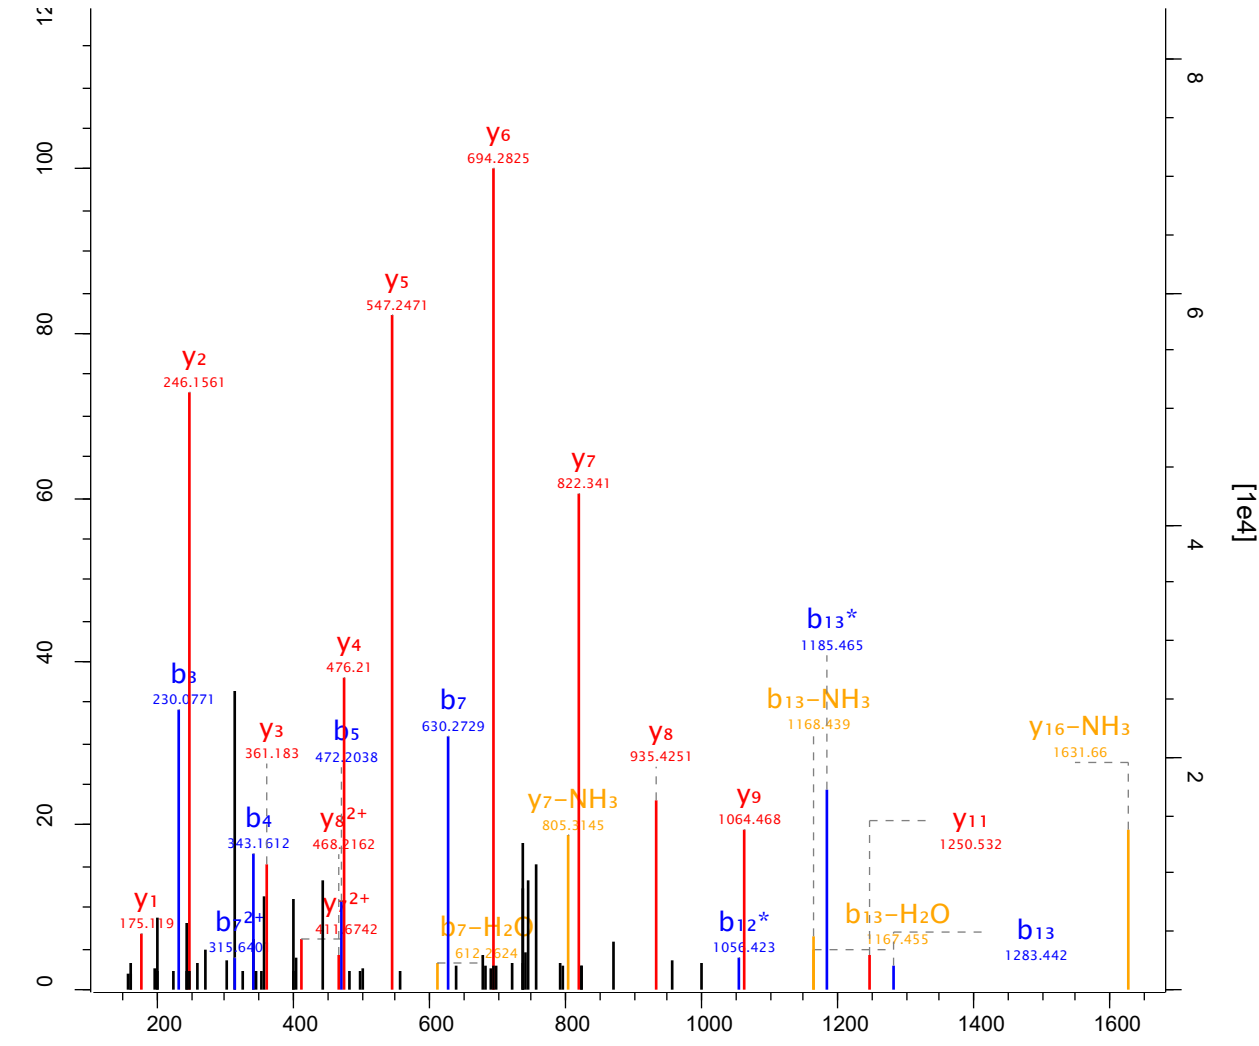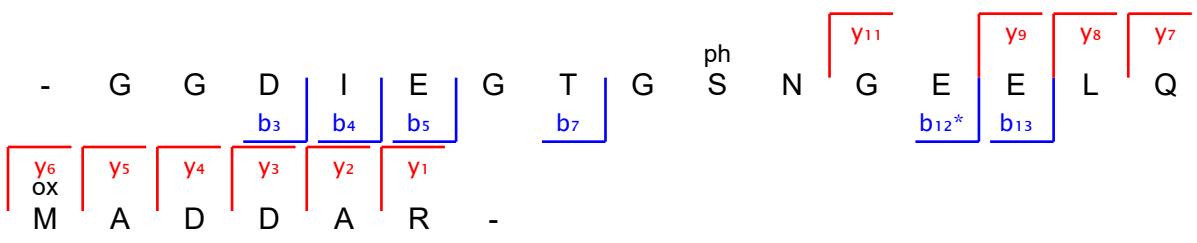

Raw file Scan Method Score m/z  
 sys\_15\_1 19597 FTMS; HCD 166.05 780.97

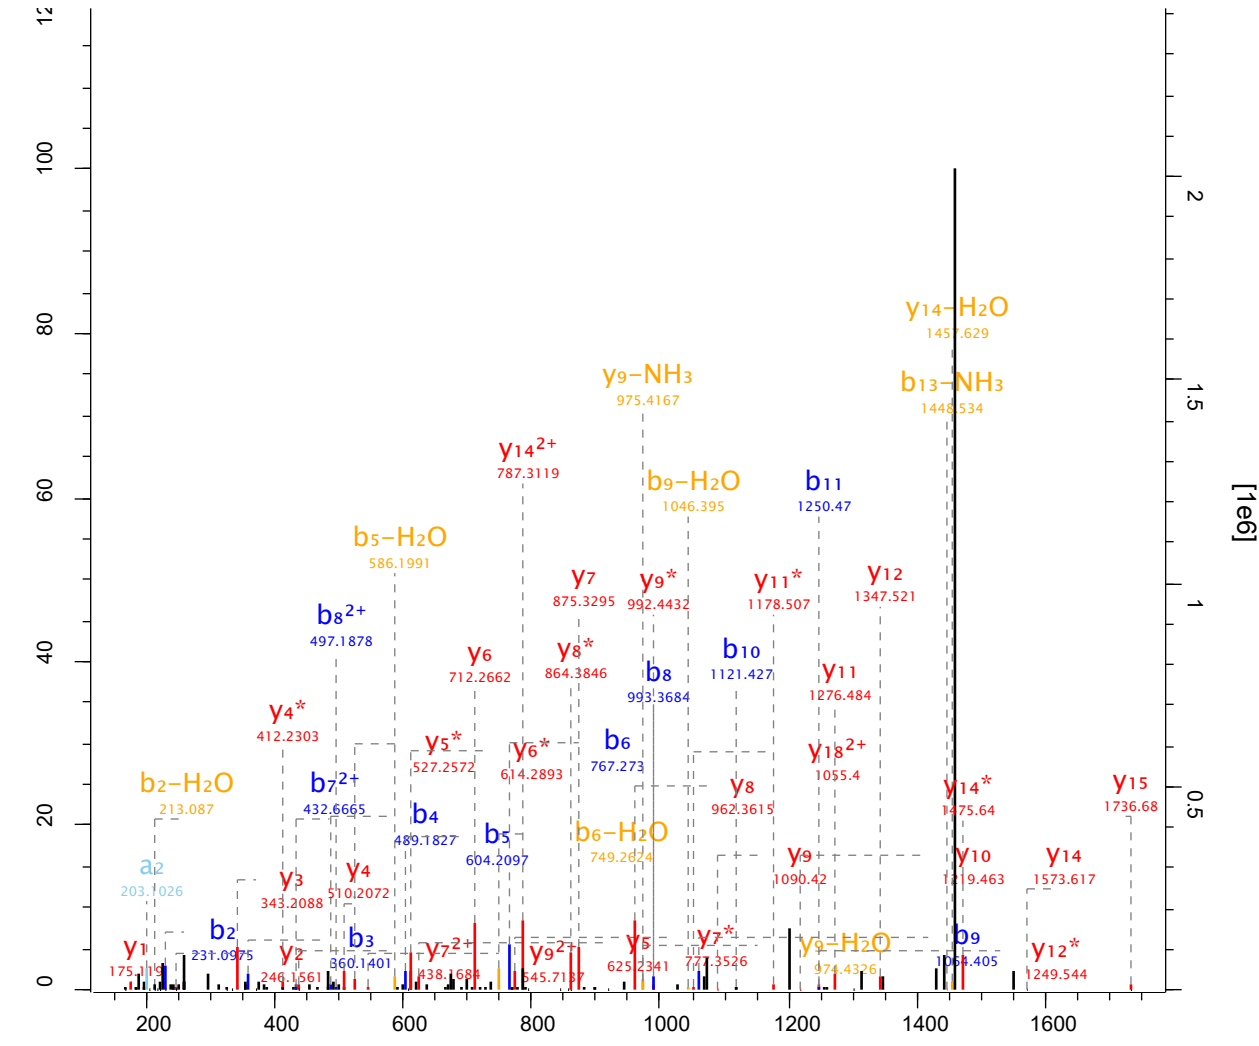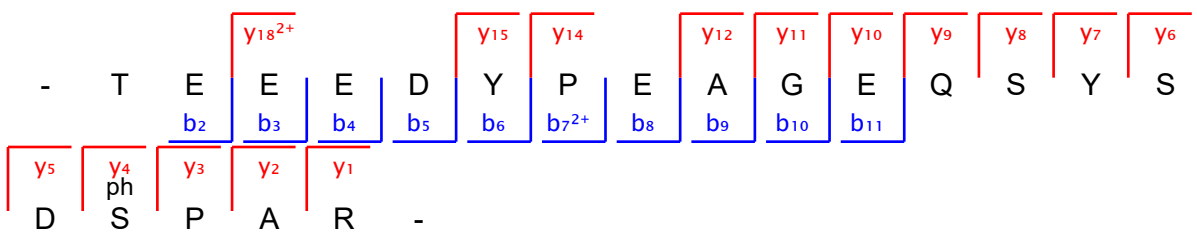

Raw file Scan Method Score m/z  
 sys\_15\_1 19668 FTMS; HCD 93.63 959.38

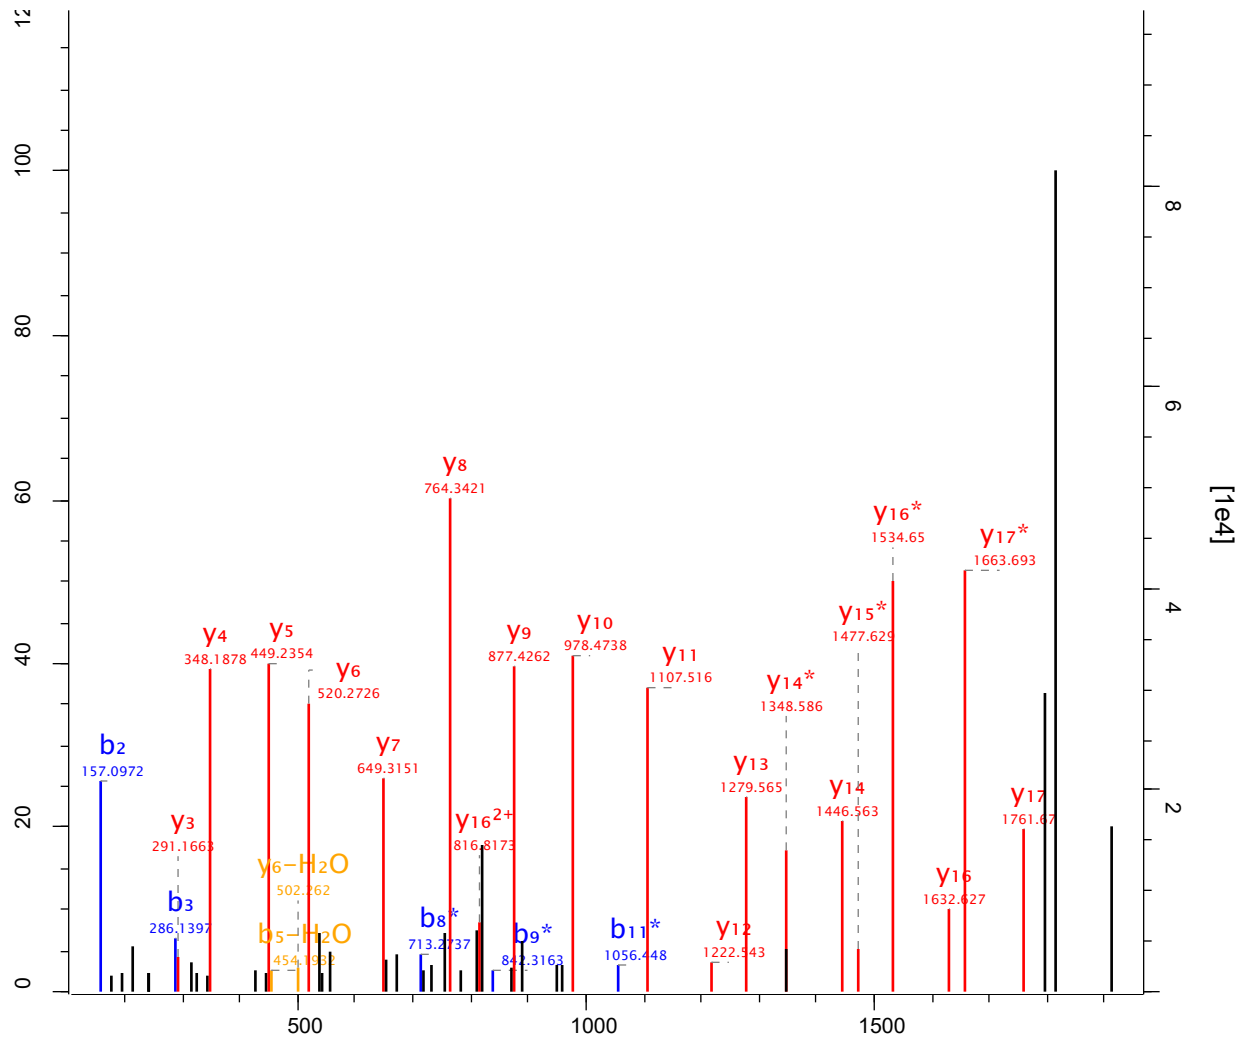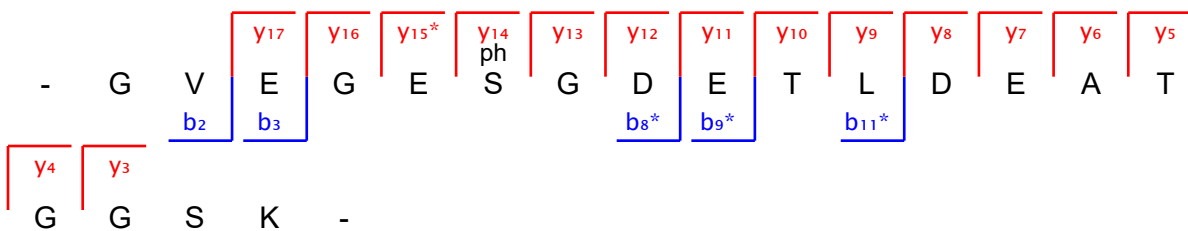

| Raw file | Scan | Method    | Score | m/z   |
|----------|------|-----------|-------|-------|
| sys_15_1 | 1967 | FTMS; HCD | 51.28 | 487.2 |

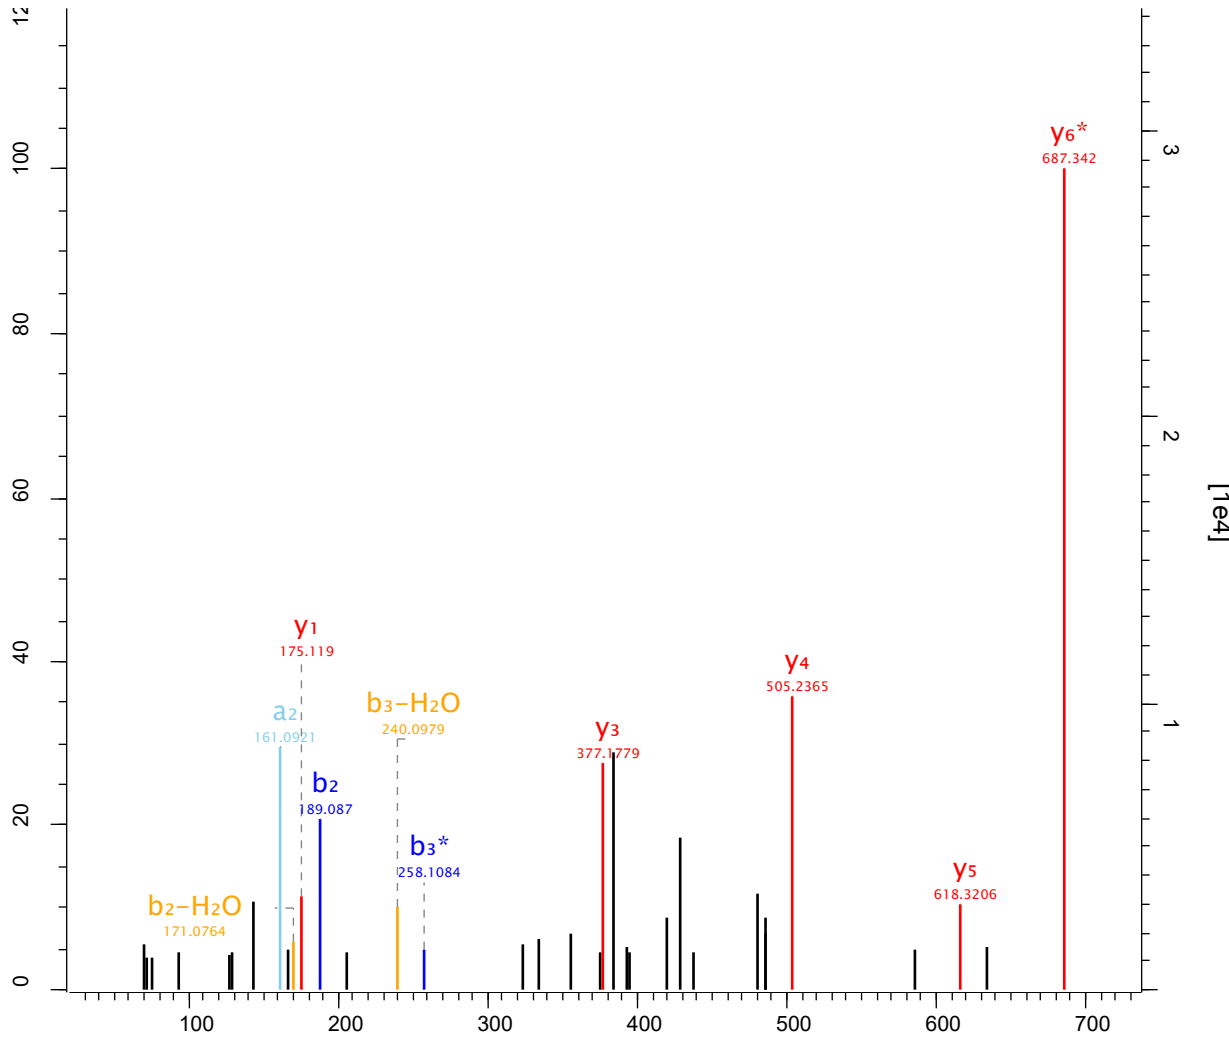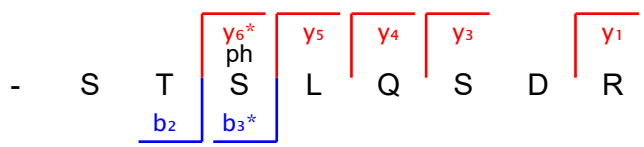

Raw file Scan Method Score m/z  
 sys\_15\_1 19786 FTMS; HCD 79.84 549.91

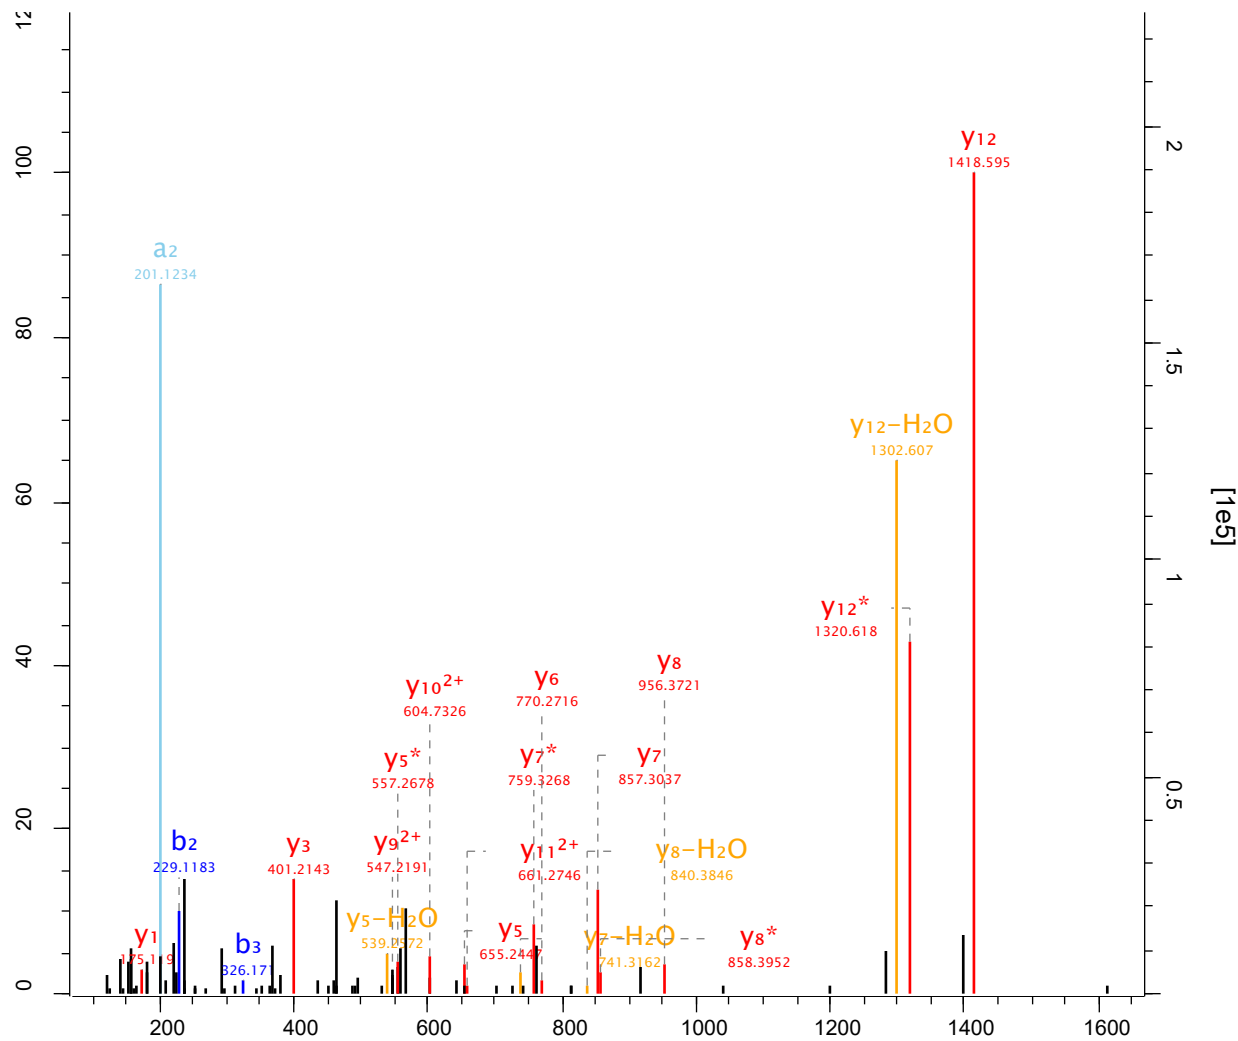

- D I P L D H V S D S P E R -

Fragmentation mapping (red boxes):  
 - I: b2  
 - P: b3, y12  
 - L: y11 2+, y10 2+, y9 2+, y8  
 - D: y10 2+, y9 2+, y8  
 - H: y9 2+, y8  
 - V: y8  
 - S: y7, y7-H2O, y6  
 - D: y6  
 - S: y5 ph  
 - S: y3  
 - P: y3  
 - E: y1  
 - R: y1



Raw file Scan Method Score m/z  
 sys\_15\_1 1984 FTMS; HCD 69.72 546.23

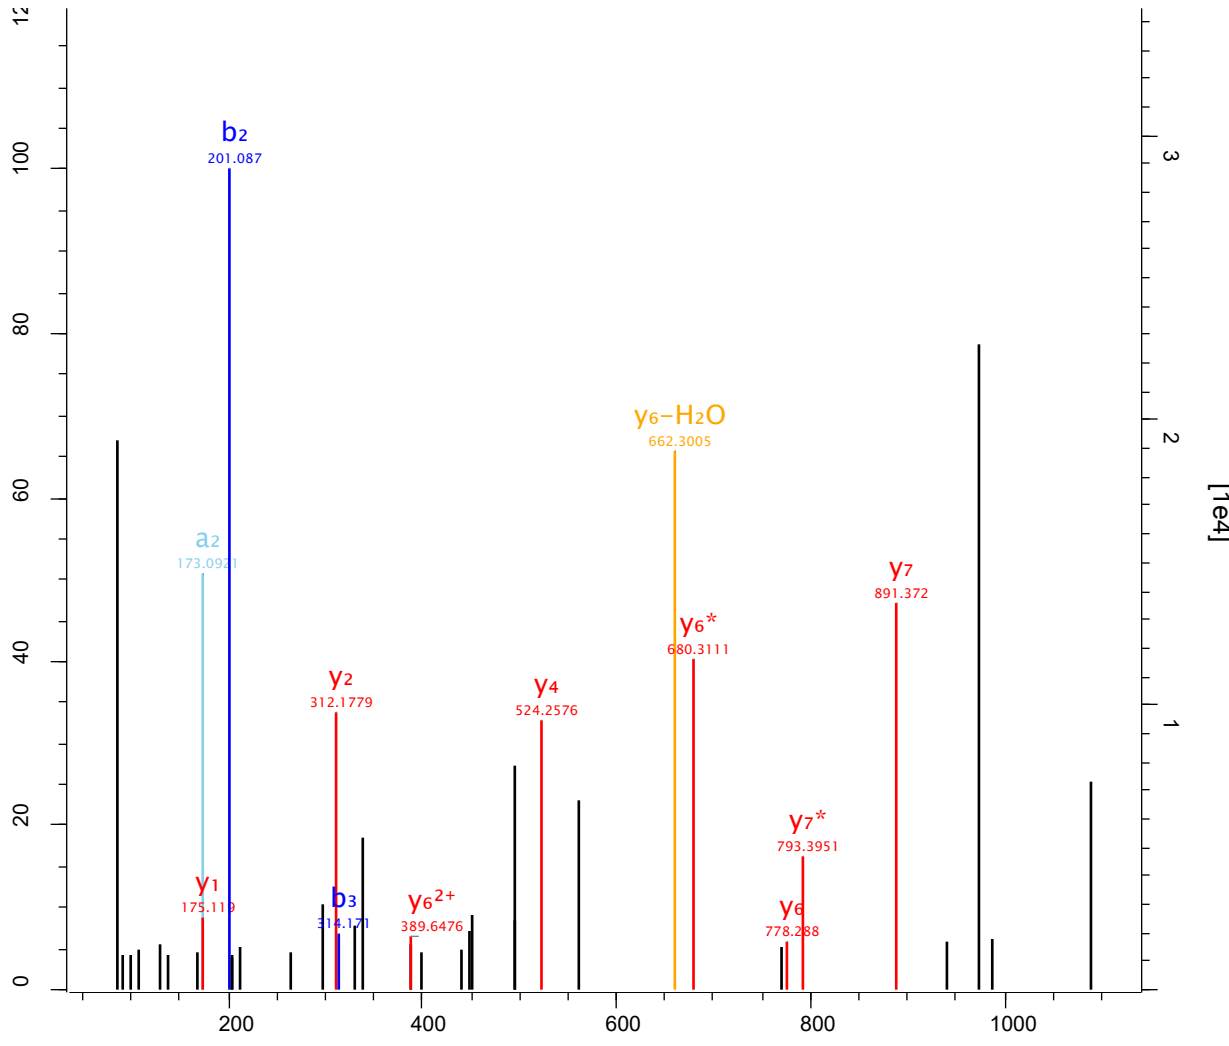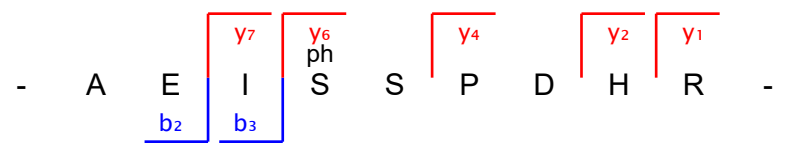

Raw file Scan Method Score m/z  
 sys\_15\_1 19935 FTMS; HCD 52.49 515.74

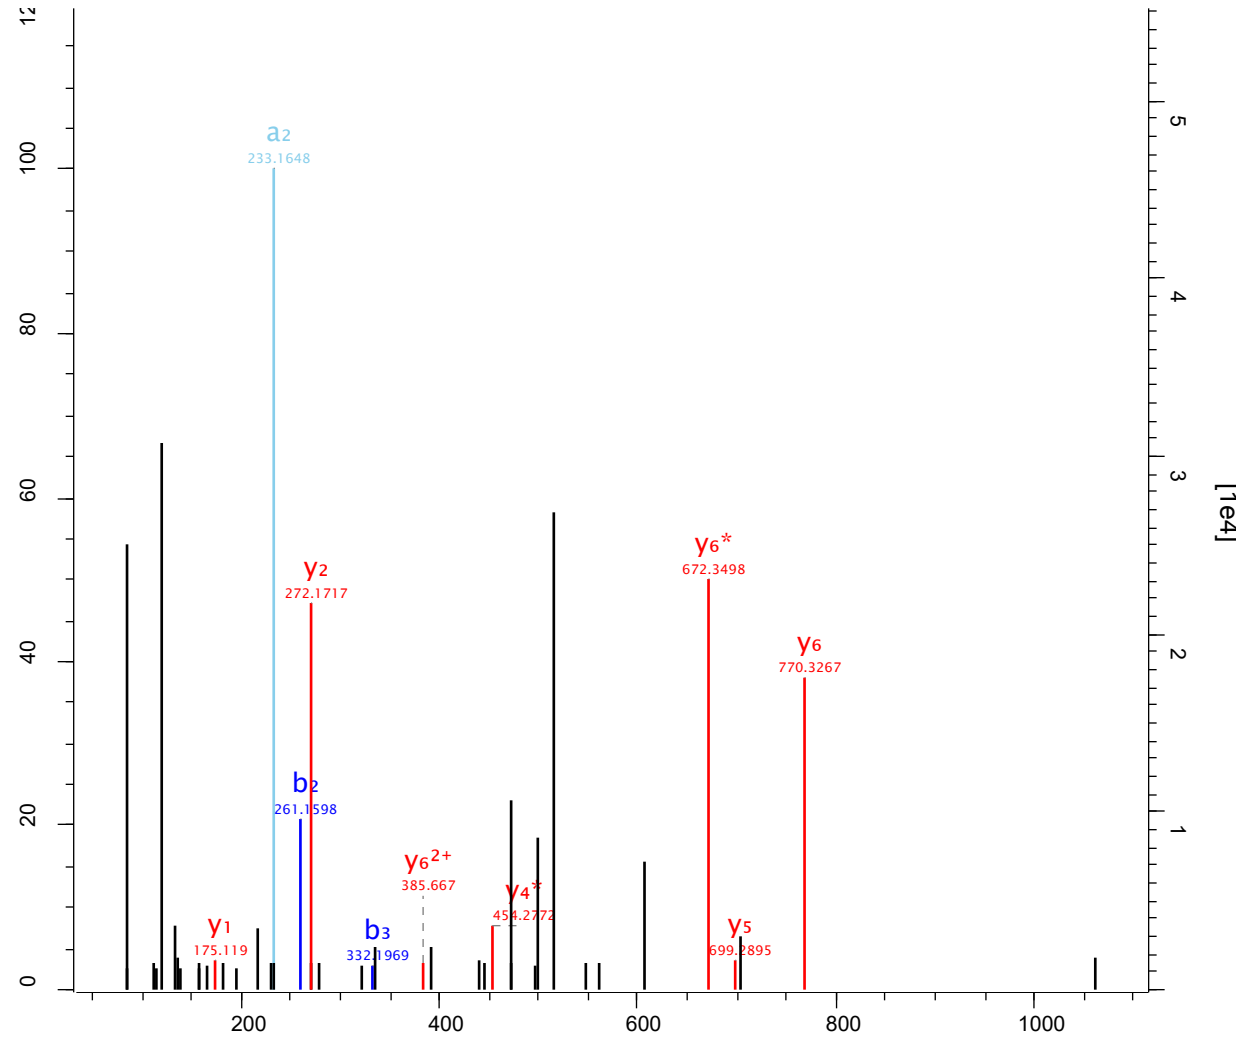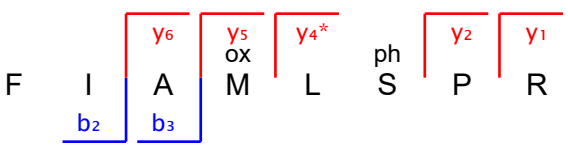

Raw file Scan Method Score m/z  
 sys\_15\_1 19985 FTMS; HCD 80.07 645.28

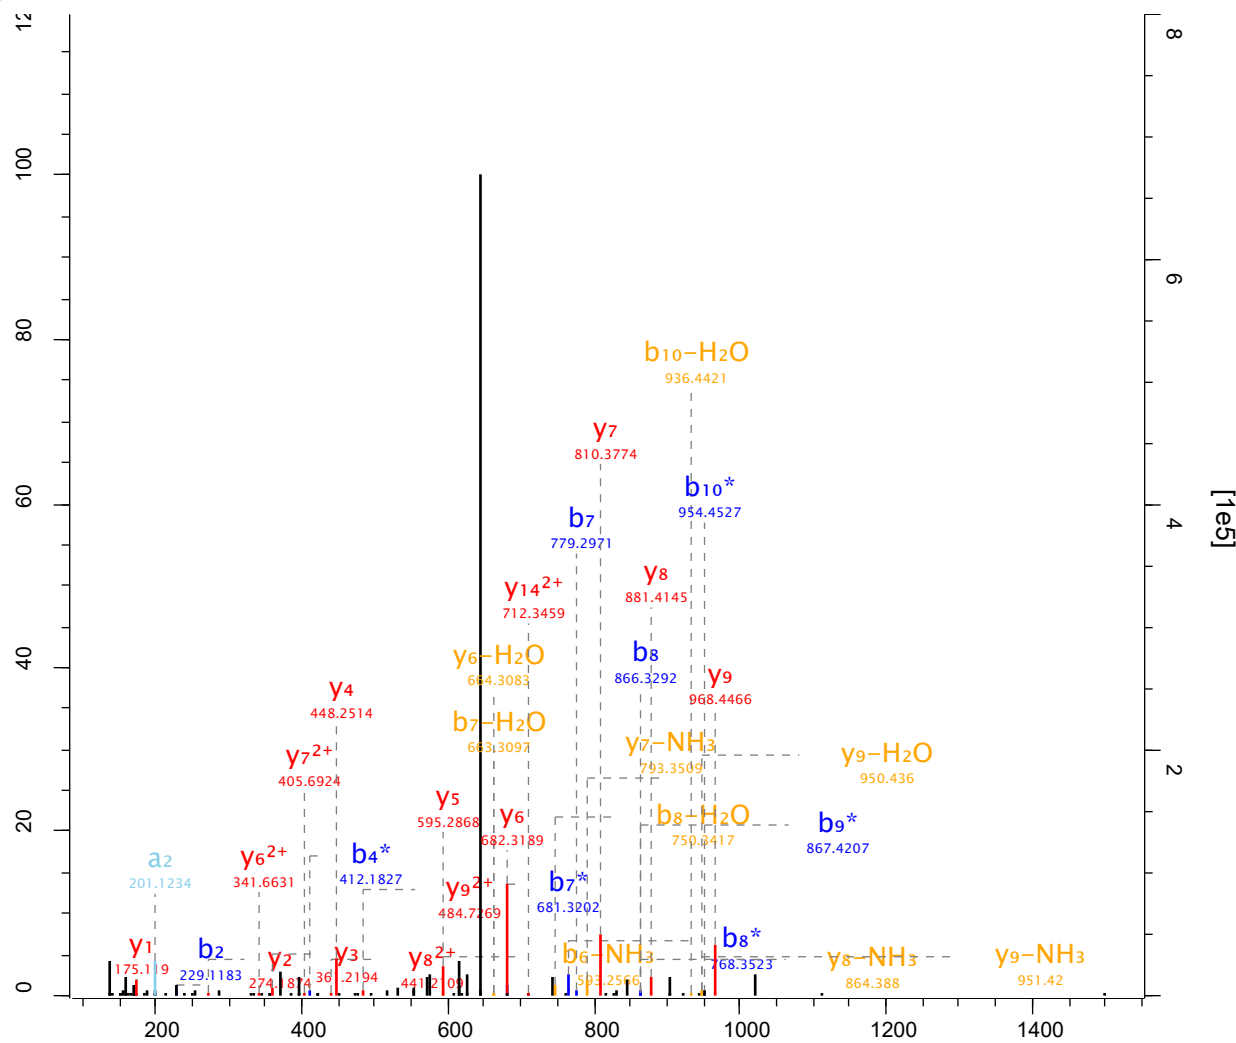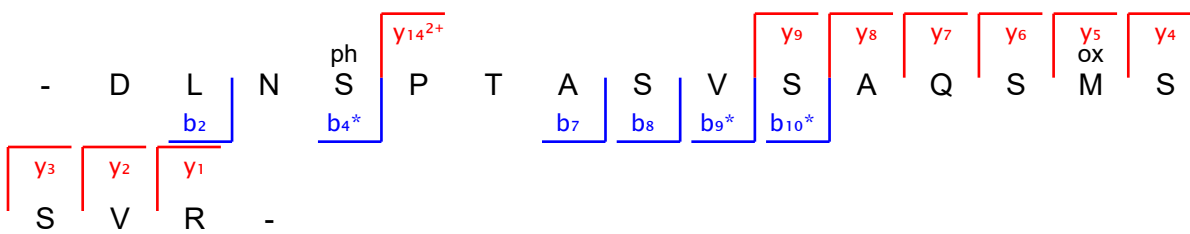

Raw file Scan Method Score m/z  
 sys\_15\_1 20120 FTMS; HCD 69.33 727.33

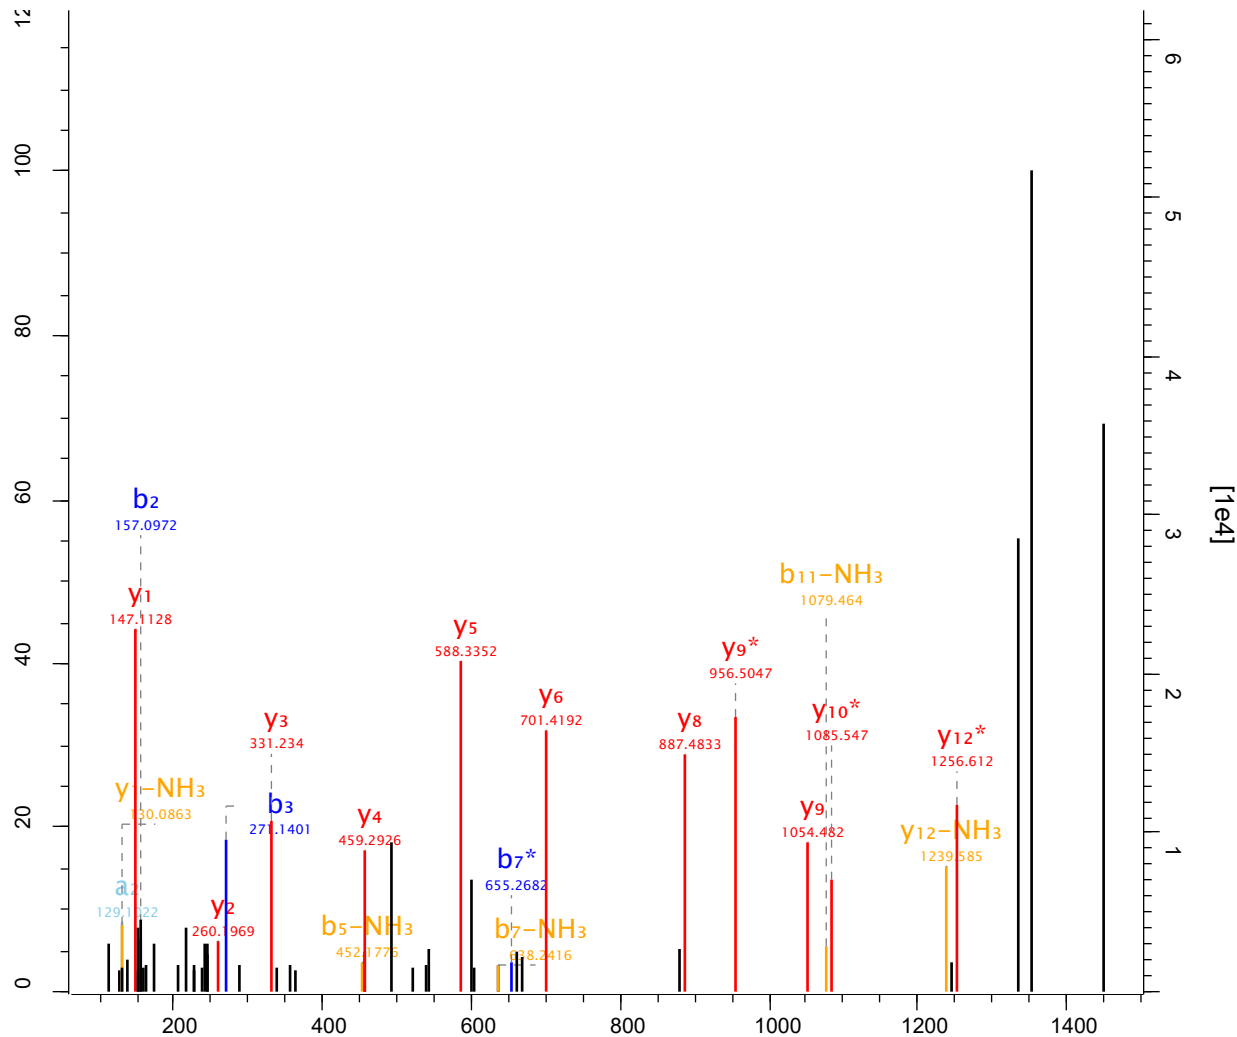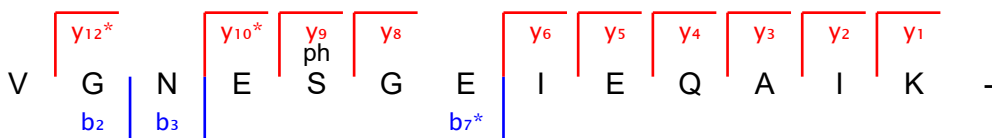

Raw file Scan Method Score m/z  
 sys\_15\_1 20130 FTMS; HCD 52.17 768.31

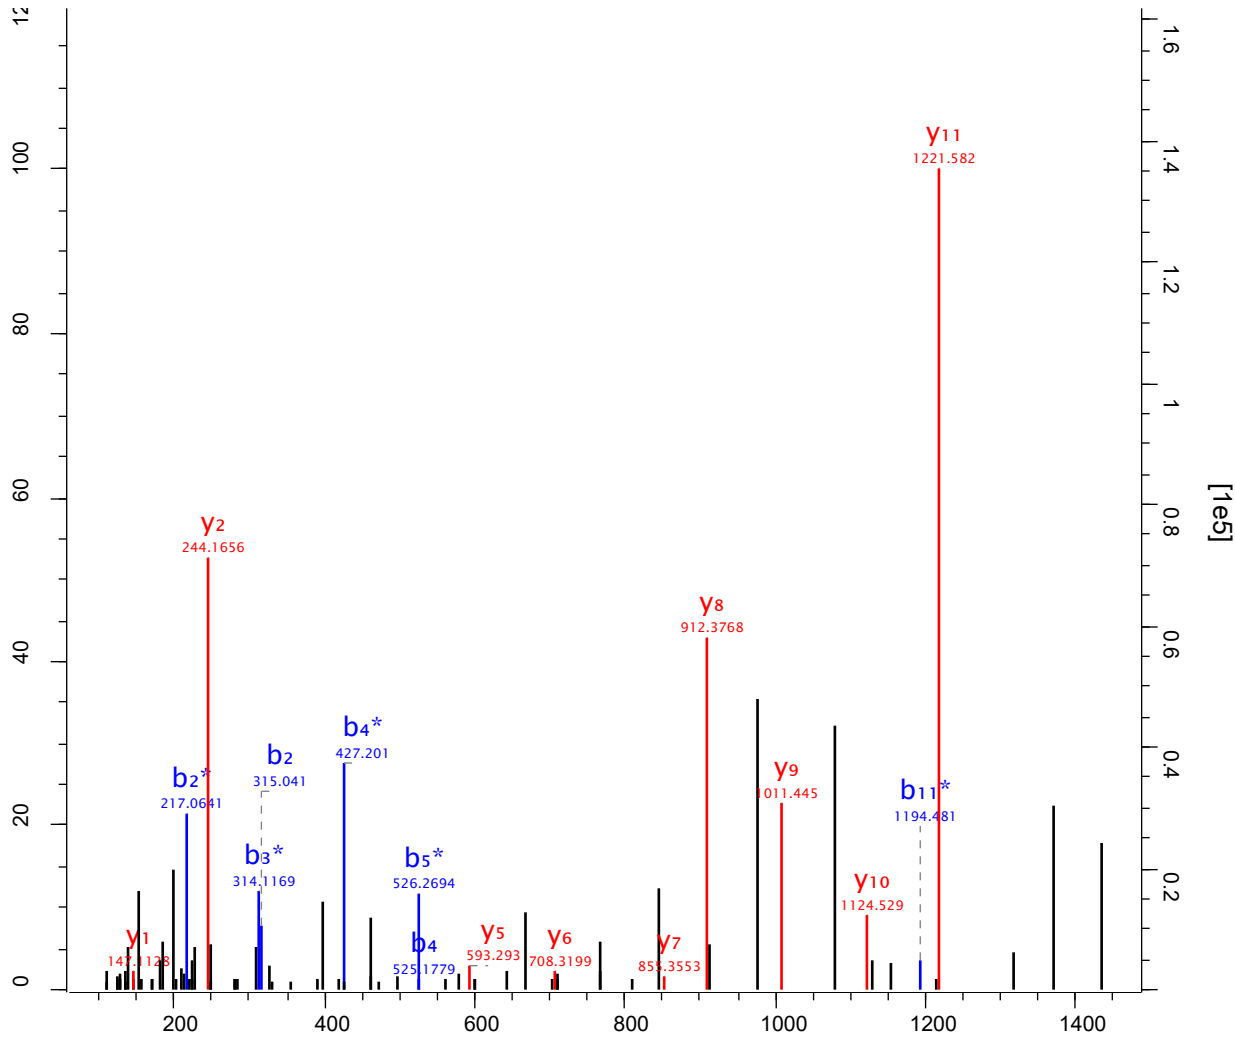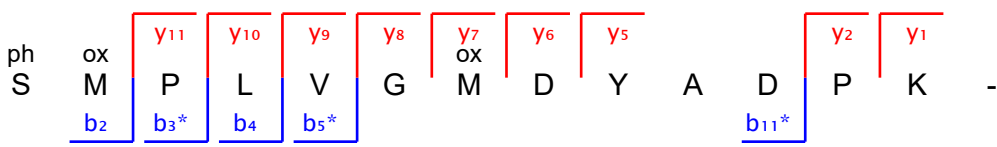

Raw file Scan Method Score m/z  
 sys\_15\_1 20134 FTMS; HCD 58.32 439.86

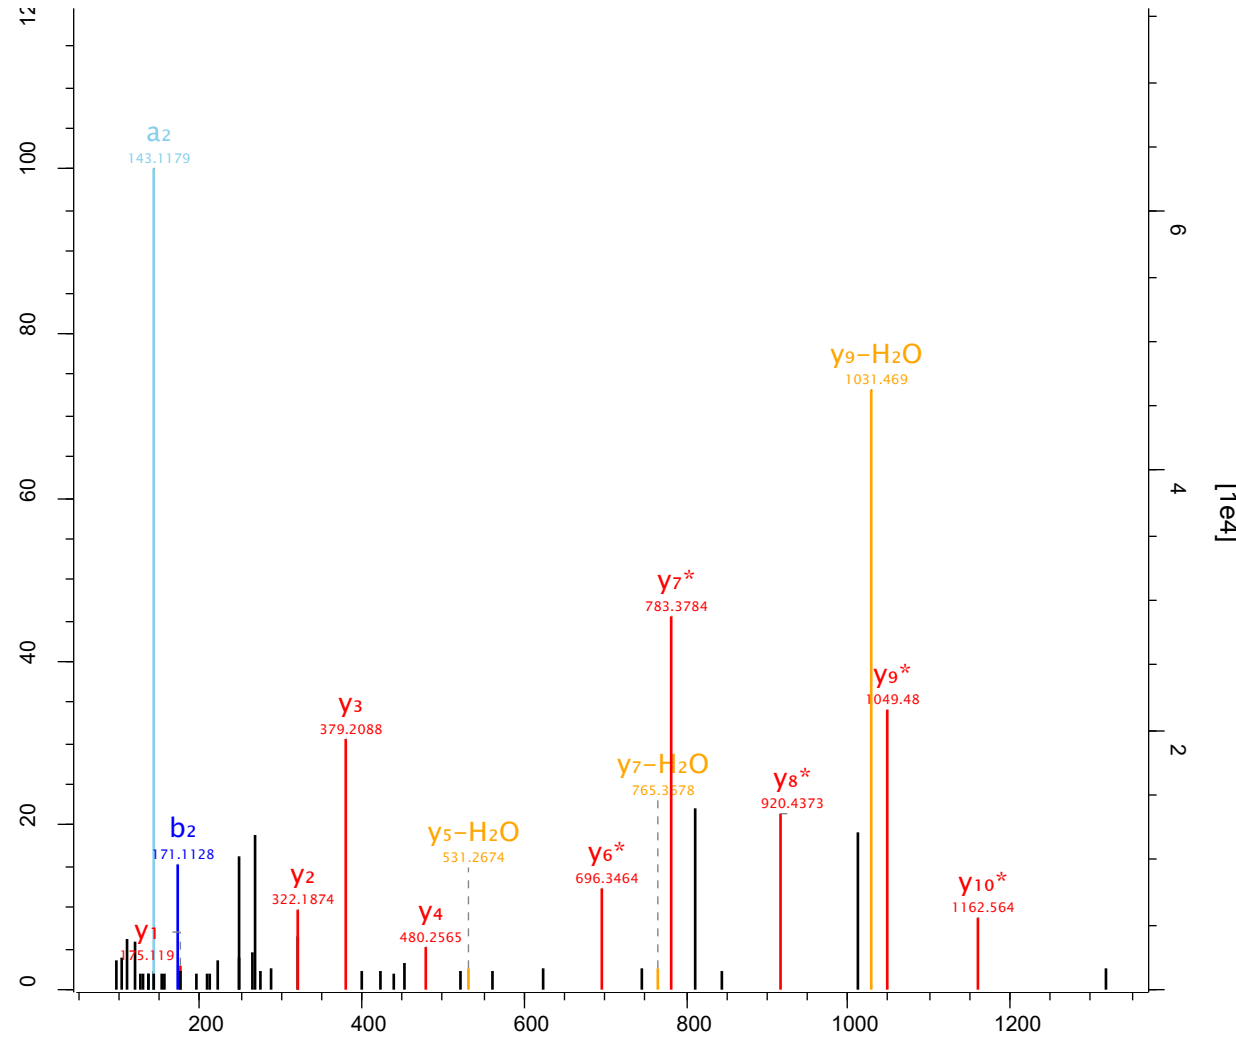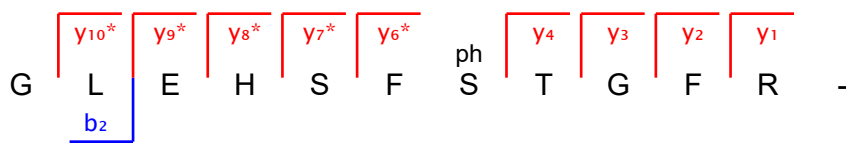

Raw file Scan Method Score m/z  
 sys\_15\_1 20154 FTMS; HCD 105.79 822.87

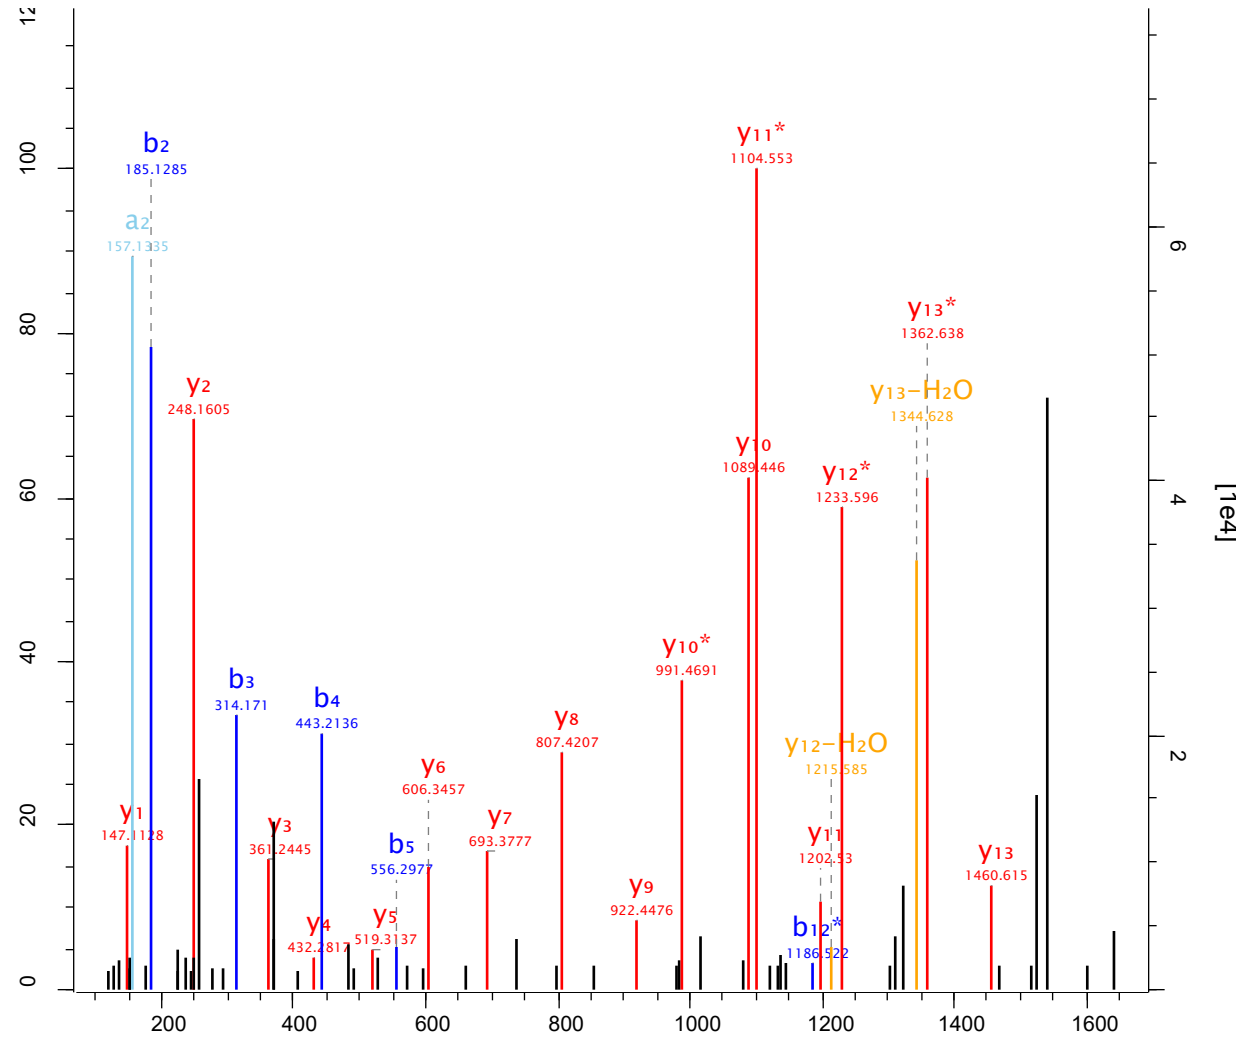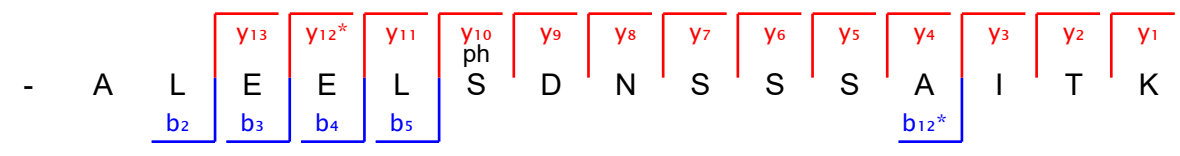

Raw file Scan Method Score m/z  
 sys\_15\_1 20564 FTMS; HCD 162.81 632.25

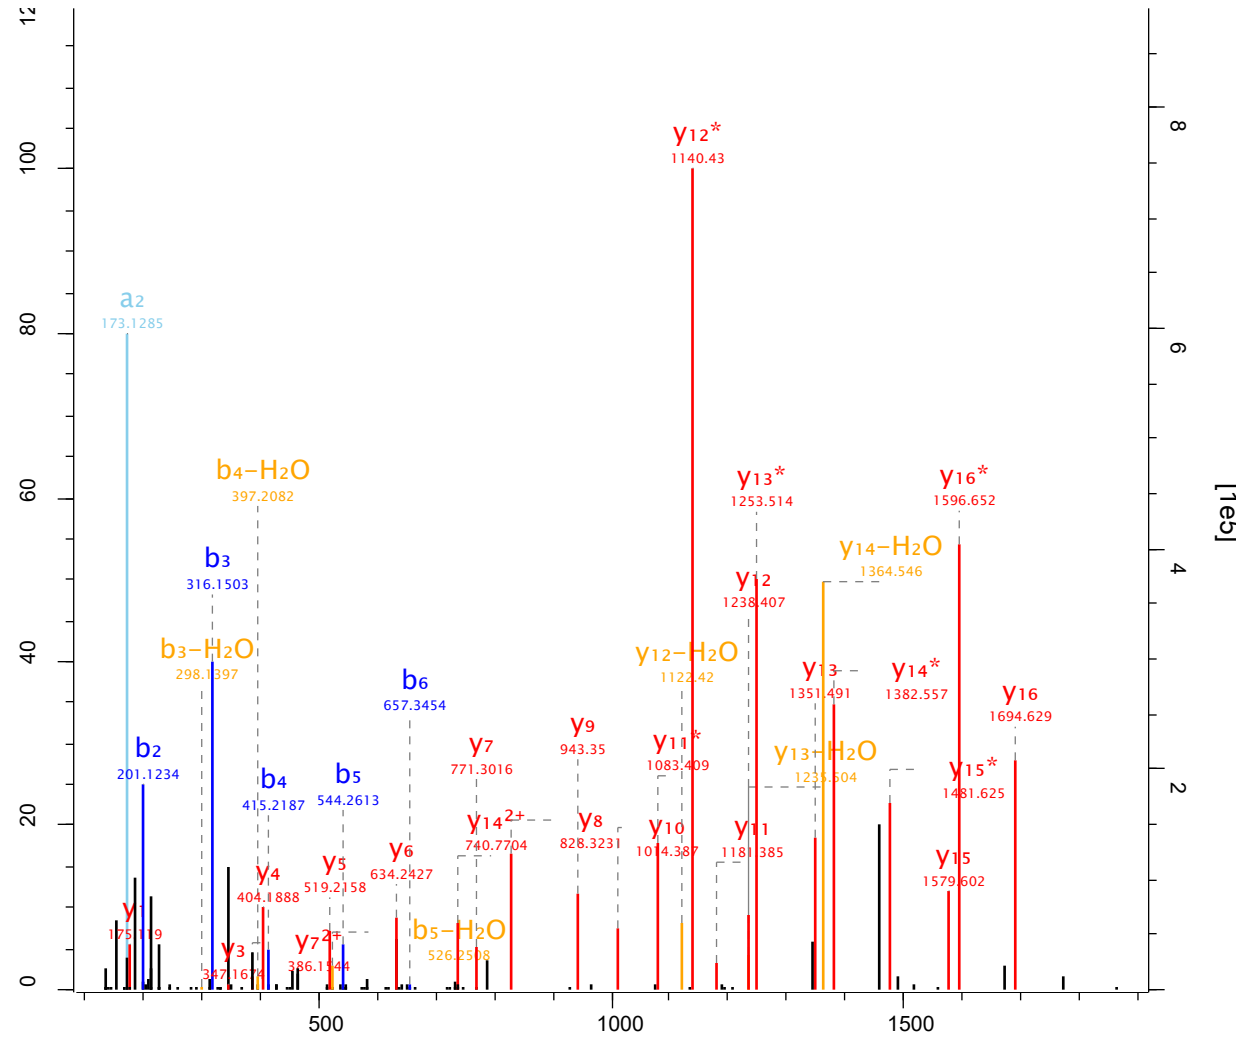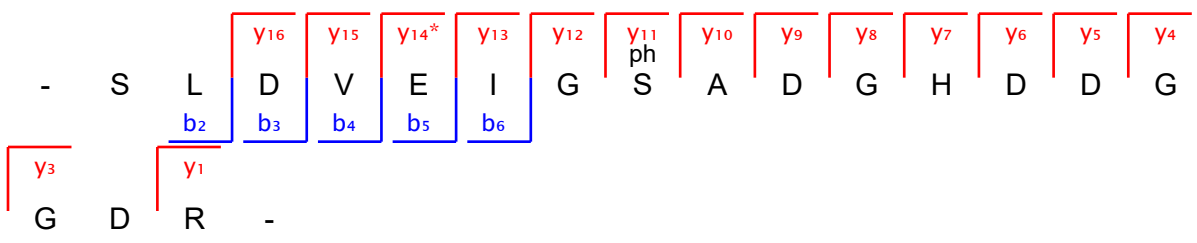



Raw file Scan Method Score m/z  
 sys\_15\_1 20596 FTMS; HCD 119.74 688.29

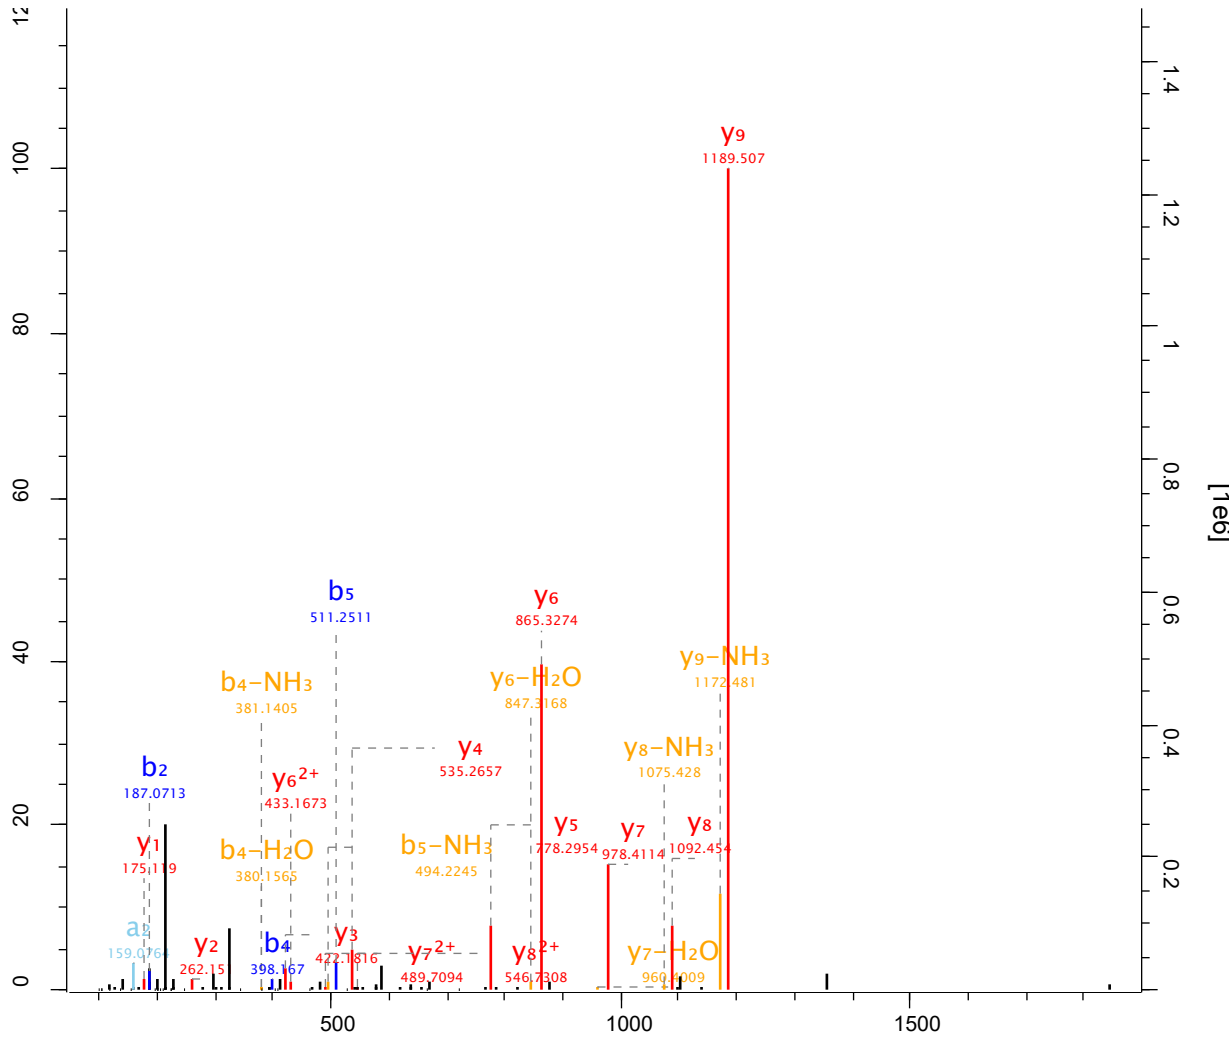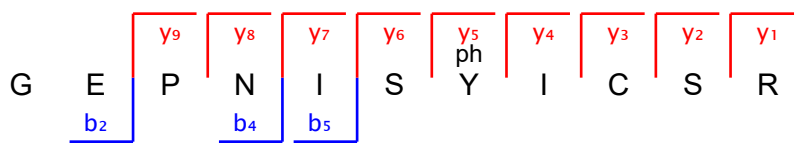

Raw file Scan Method Score m/z  
 sys\_15\_1 20659 FTMS; HCD 88.34 517.27

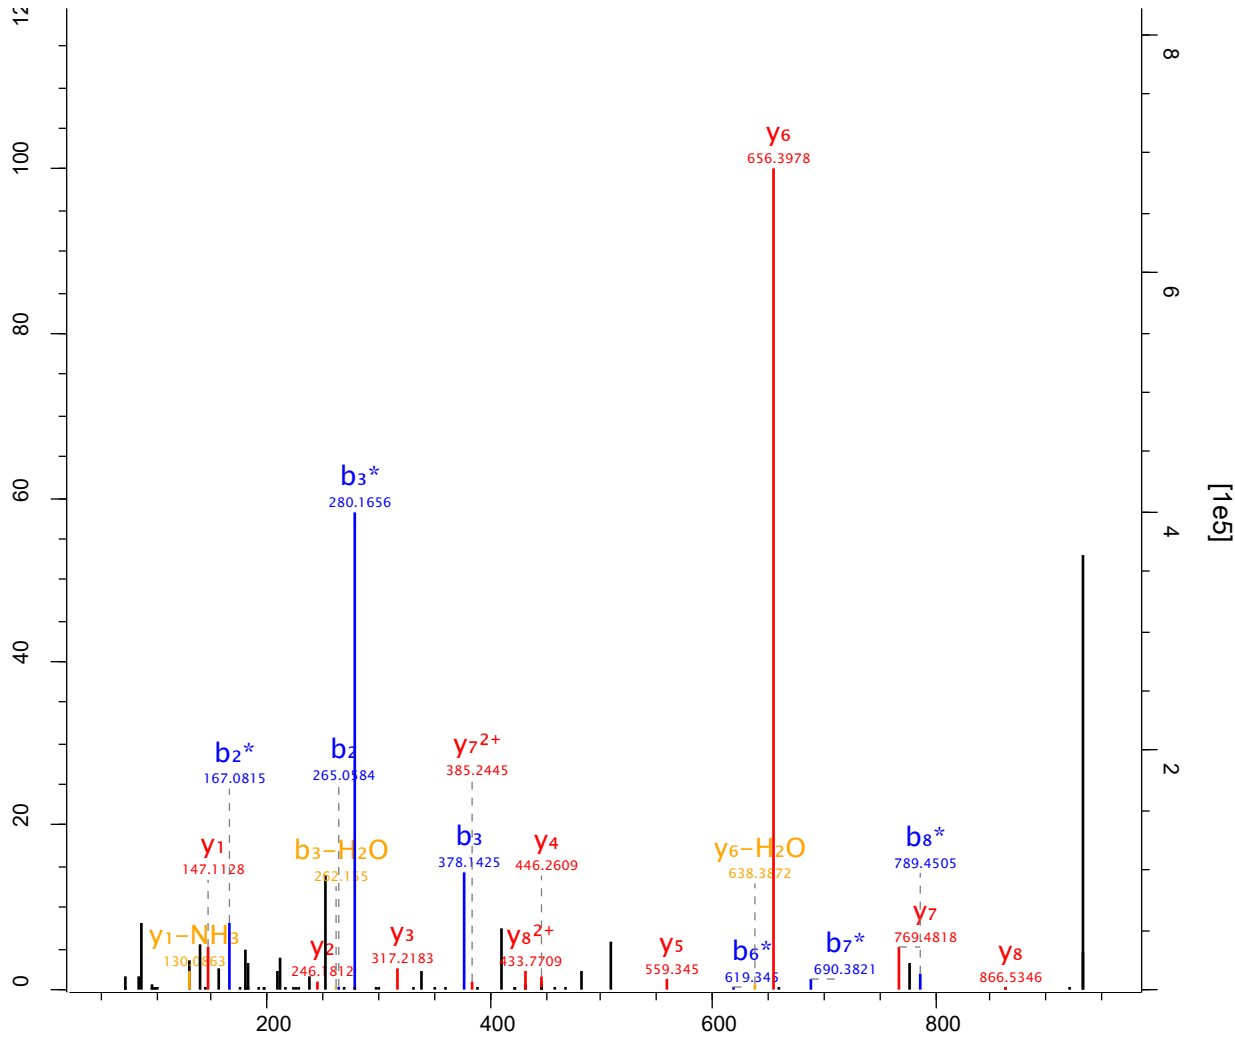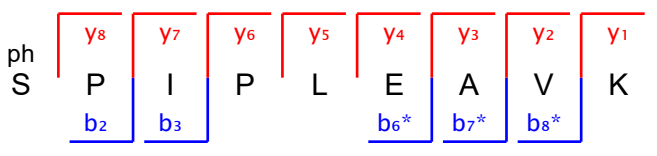

Raw file Scan Method Score m/z  
 sys\_15\_1 20683 FTMS; HCD 189.77 806.88

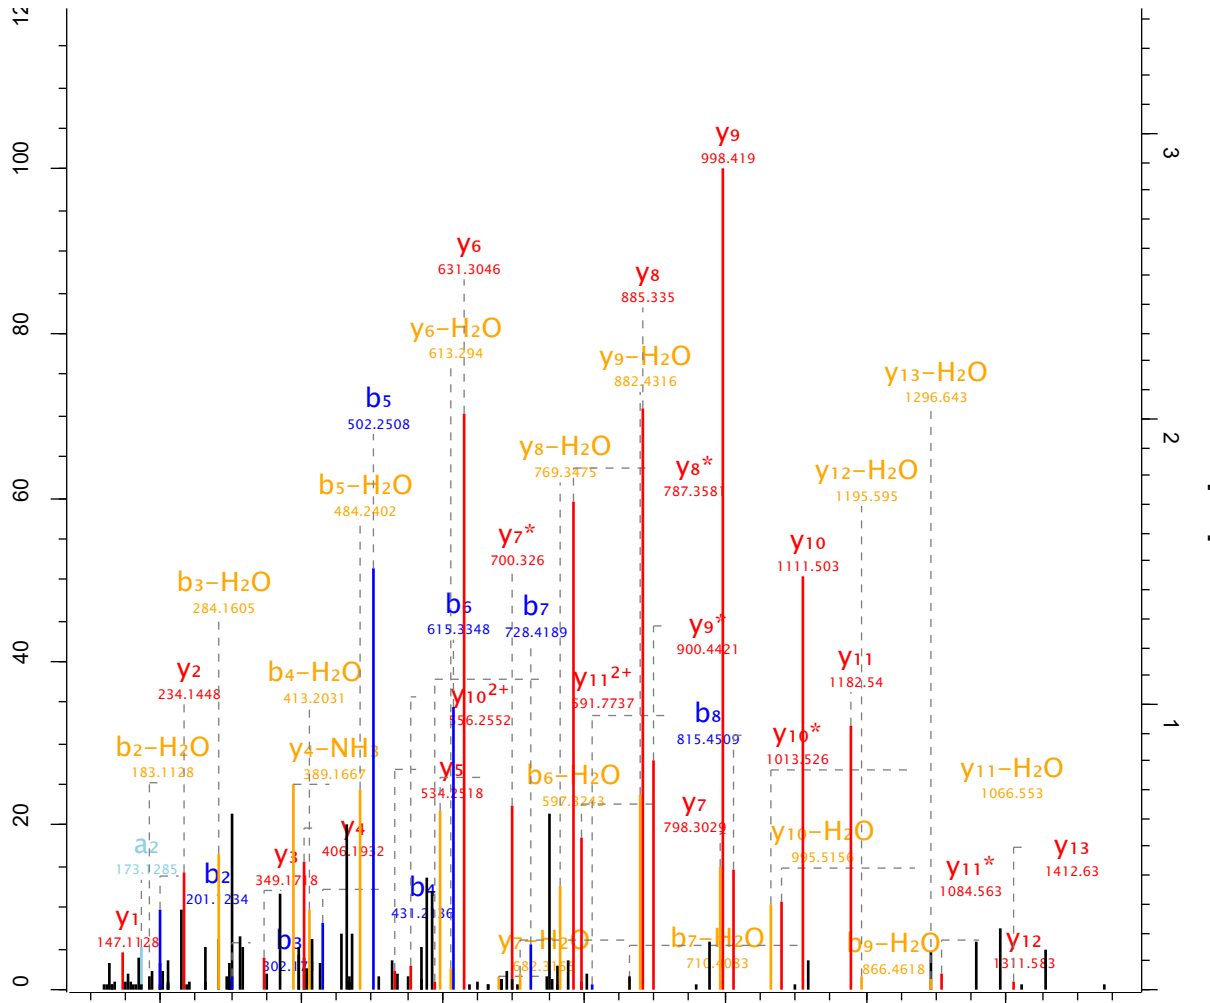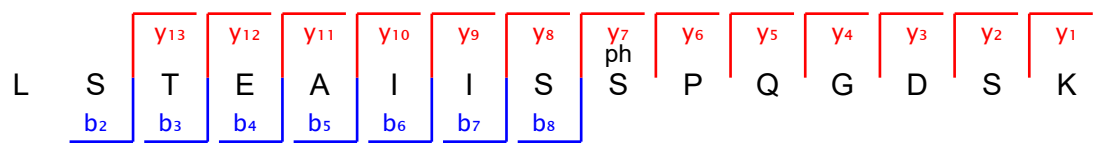

Raw file Scan Method Score m/z  
 sys\_15\_1 20702 FTMS; HCD 263.55 894.36

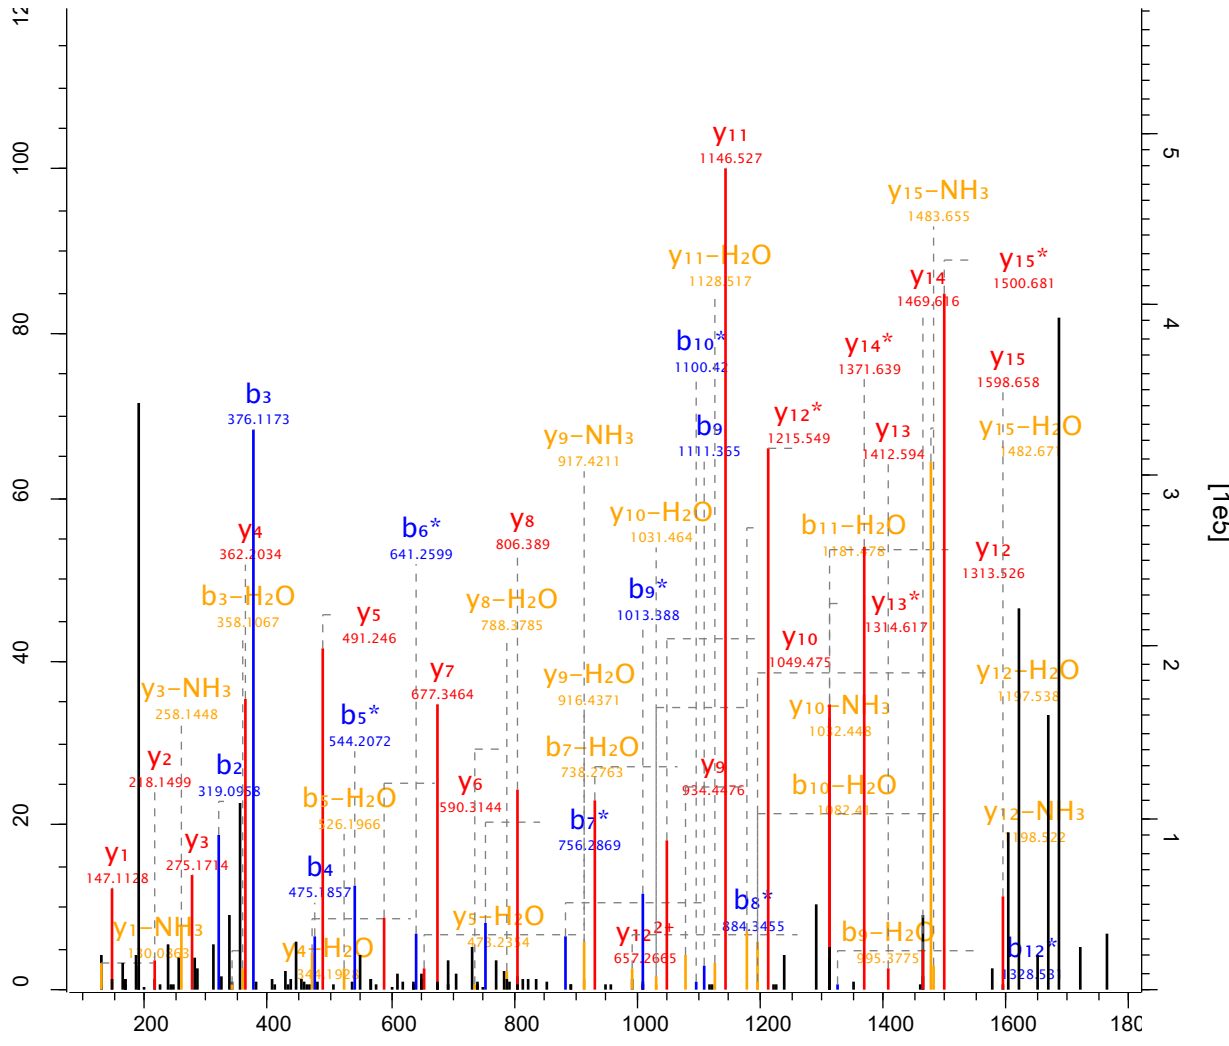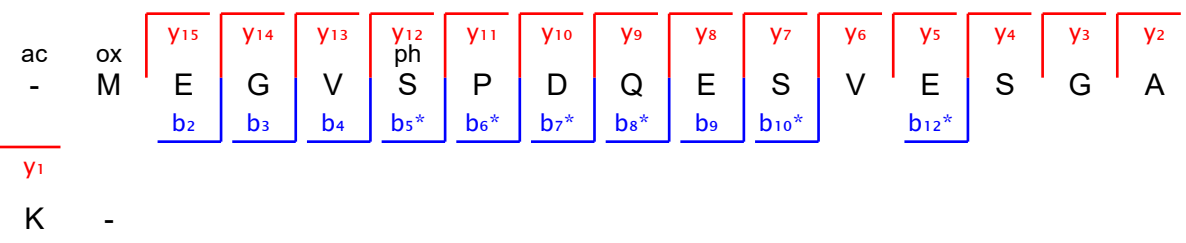

Raw file Scan Method Score m/z  
 sys\_15\_1 20782 FTMS; HCD 101.6 694.63

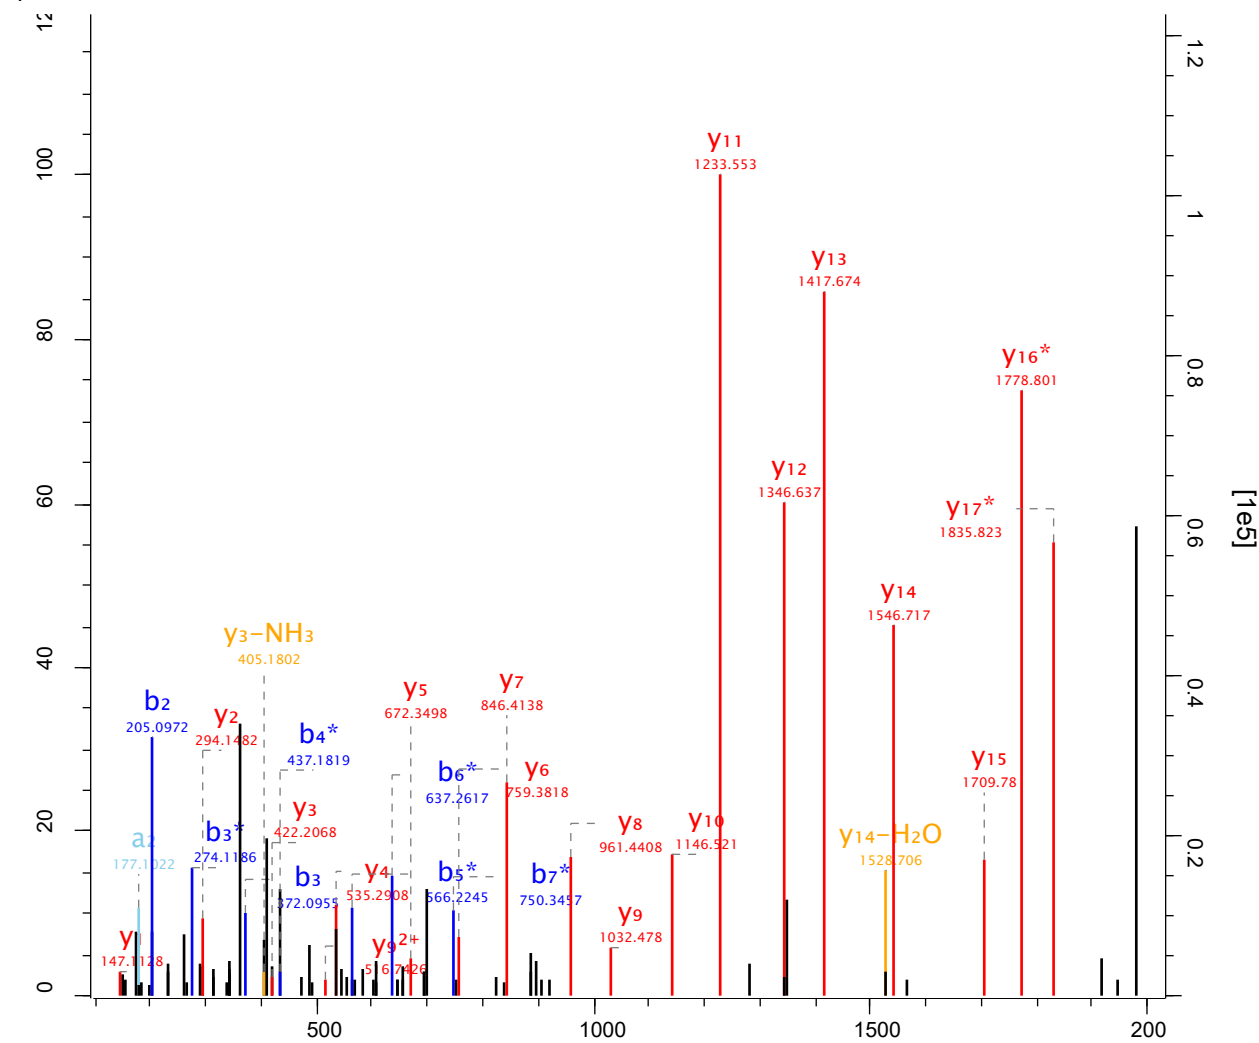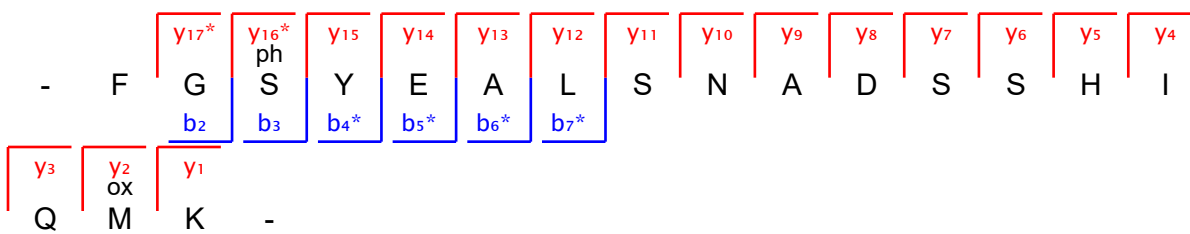

Raw file Scan Method Score m/z  
 sys\_15\_1 20799 FTMS; HCD 75.54 883.73

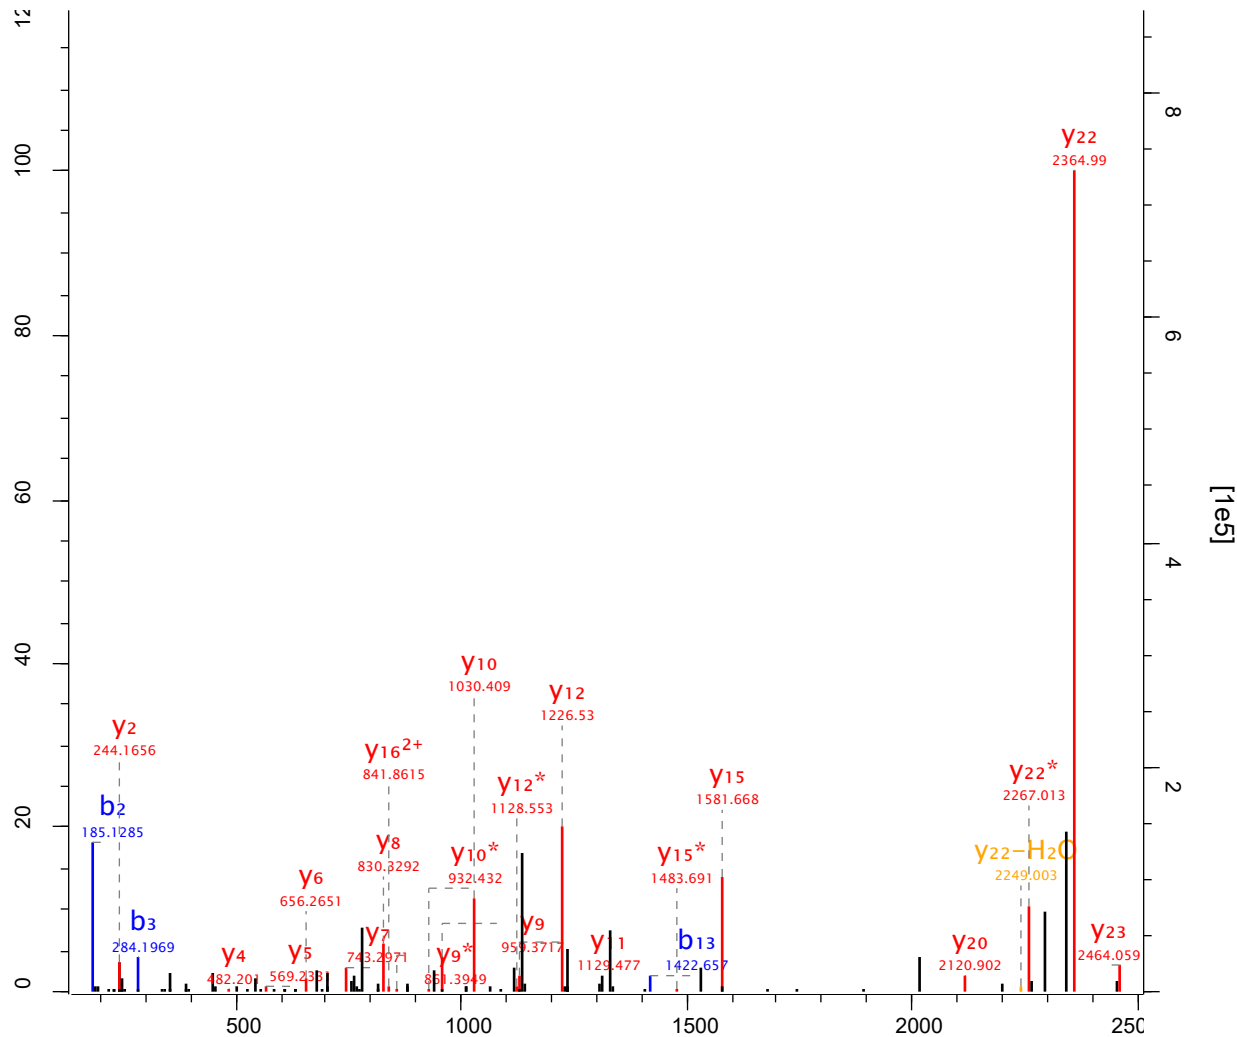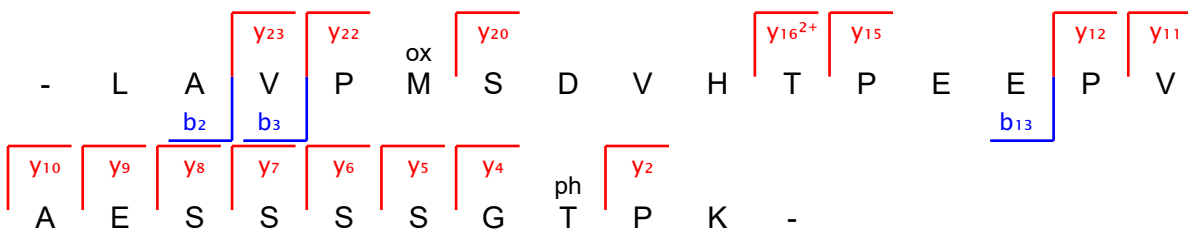

Raw file Scan Method Score m/z  
 sys\_15\_1 20955 FTMS; HCD 62.09 615.76

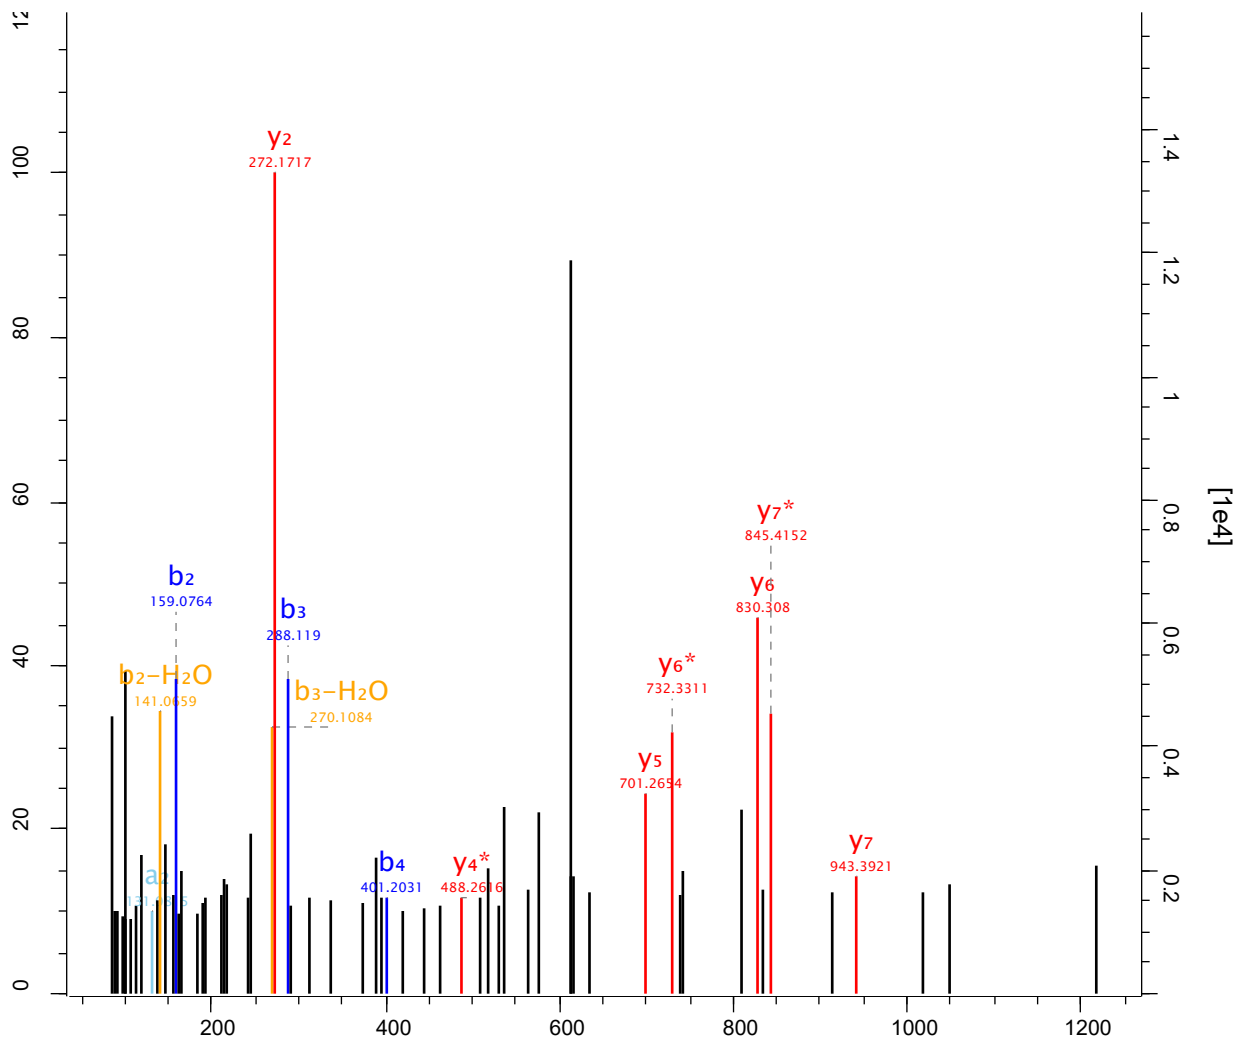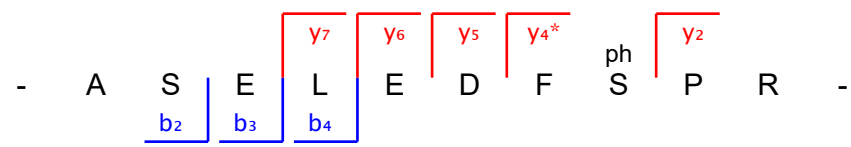

Raw file Scan Method Score m/z  
 sys\_15\_1 21058 FTMS; HCD 71.12 847.37

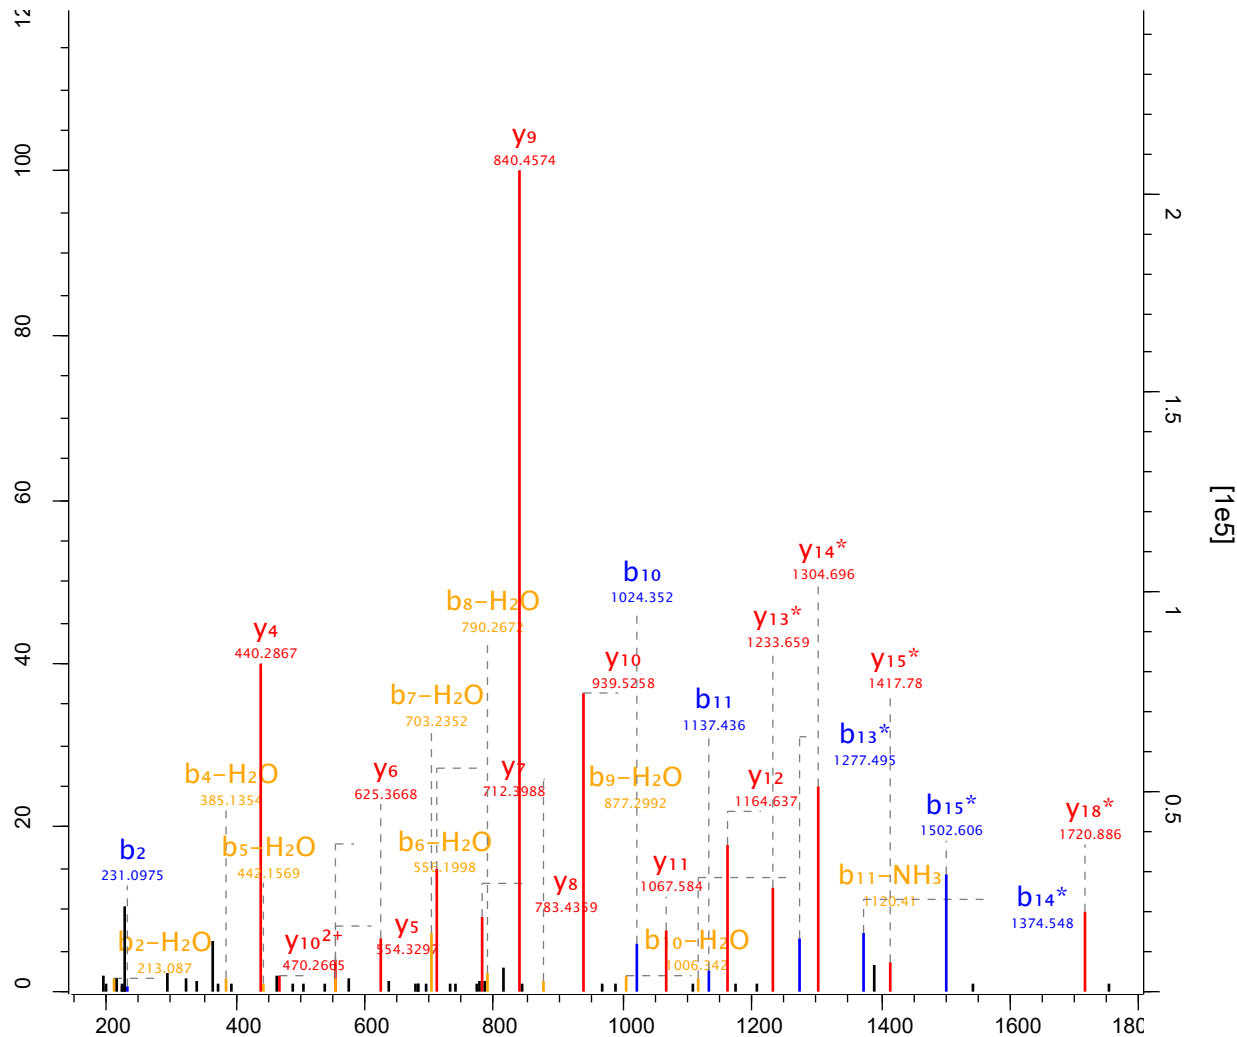

- E T G D G N ox S S E I A S P Q  
 b2 b10 b11 b13\* b14\* b15\* y18\* y15\* y14\* y13\* ph y12 y11  
 y10 y9 y8 y7 y6 y5 y4  
 V G A S A N P P V K -



Raw file Scan Method Score m/z  
 sys\_15\_1 21078 FTMS; HCD 148.15 871.91

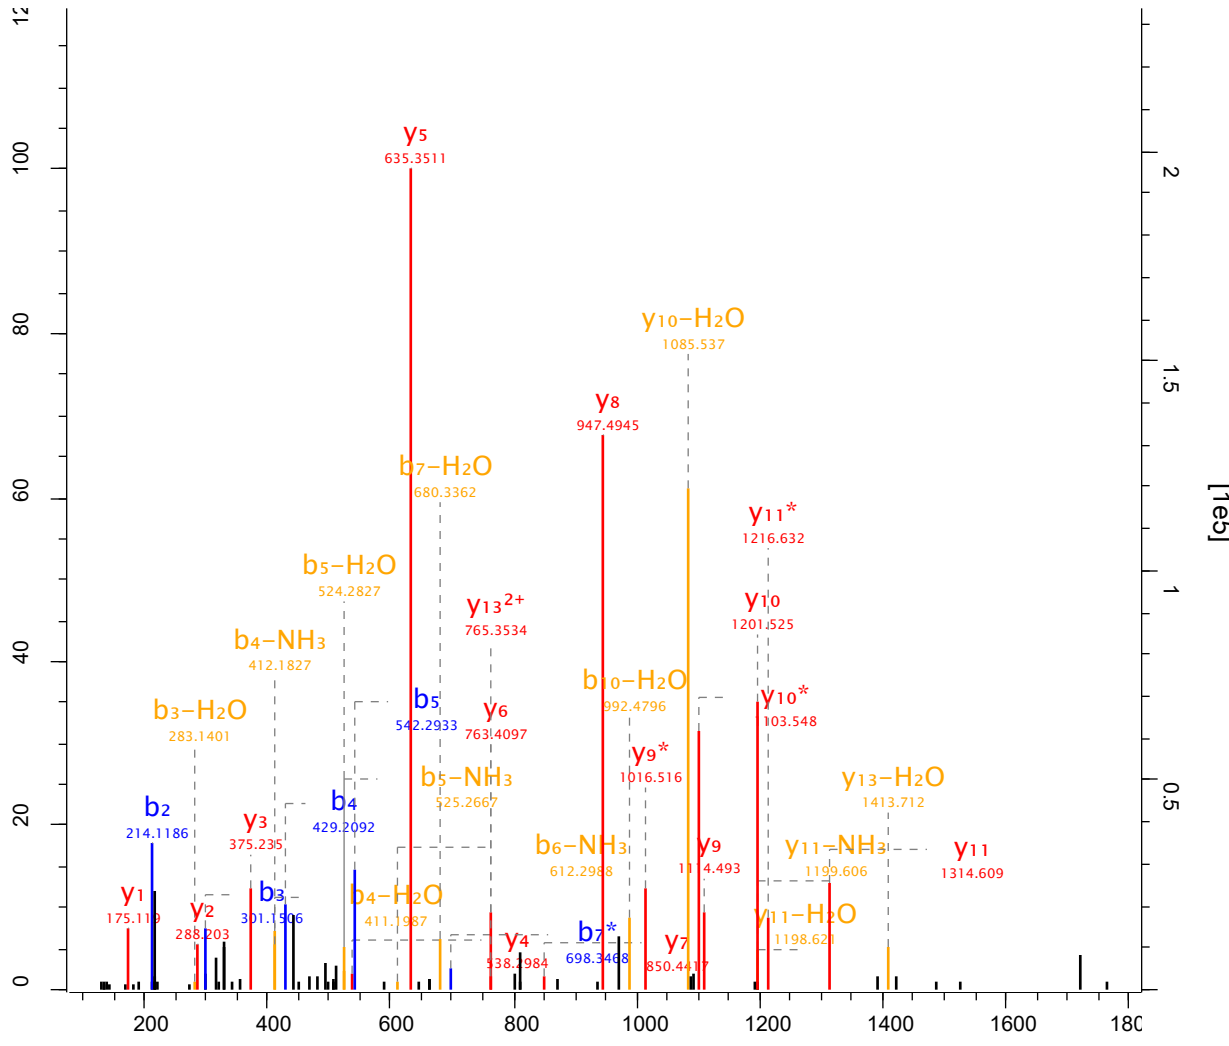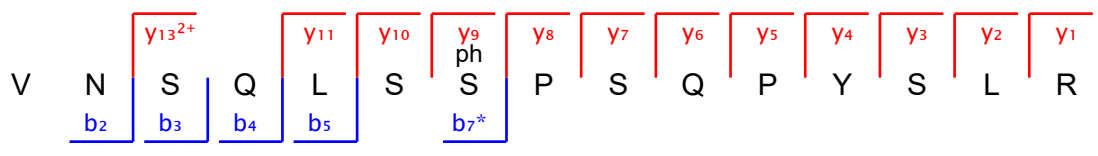

Raw file Scan Method Score m/z  
 sys\_15\_1 21530 FTMS; HCD 279.97 831.38

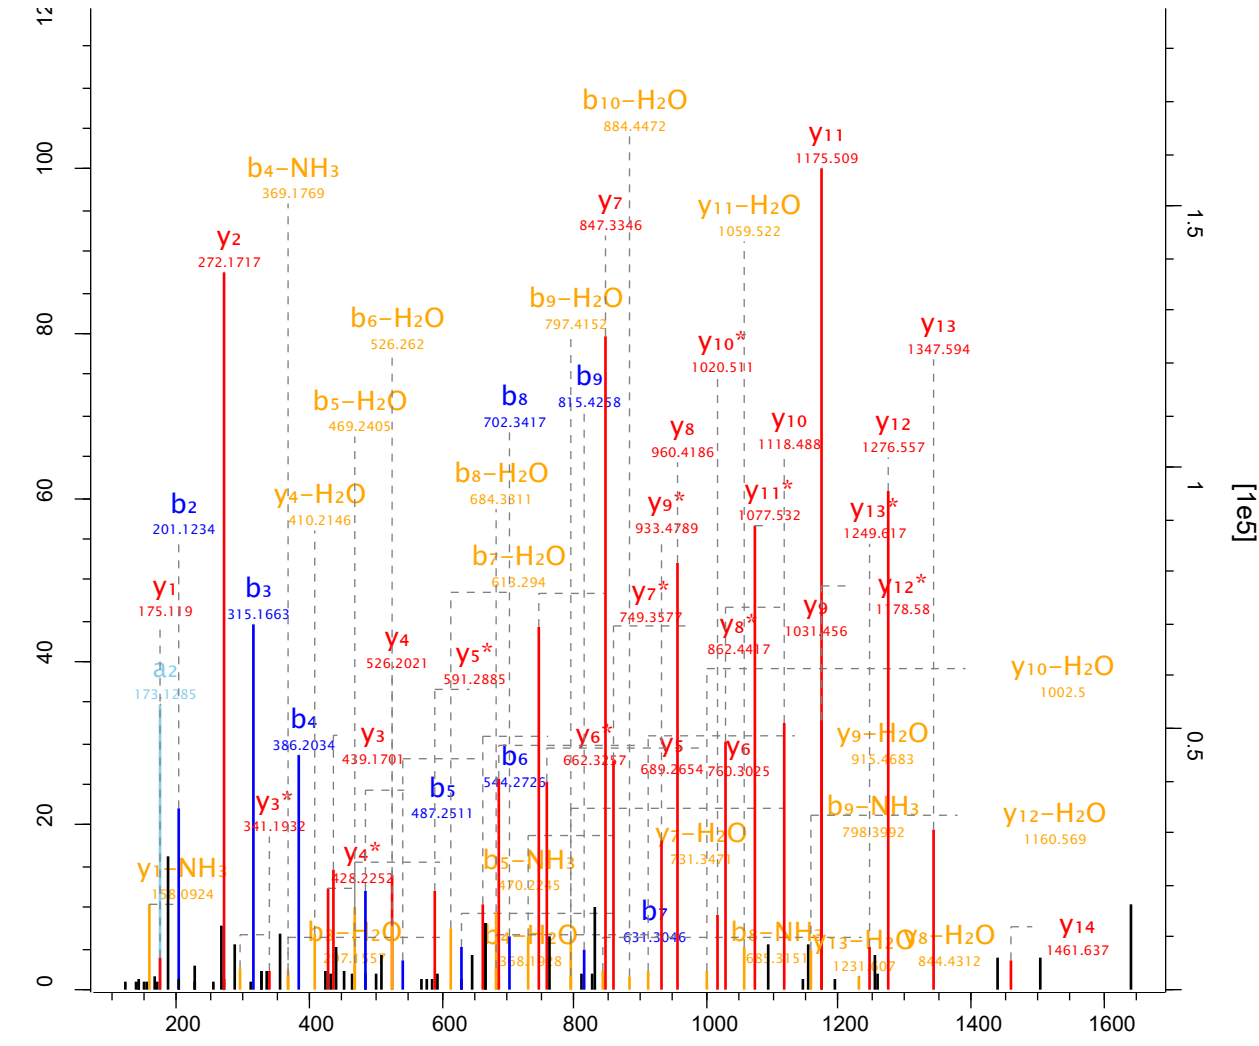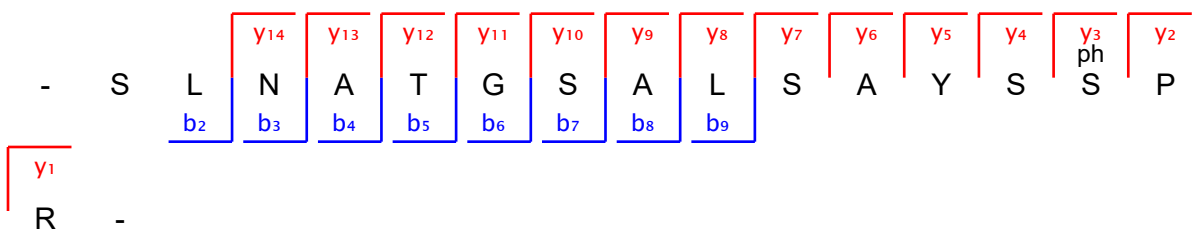

Raw file Scan Method Score m/z  
 sys\_15\_1 21543 FTMS; HCD 164.2 851.38

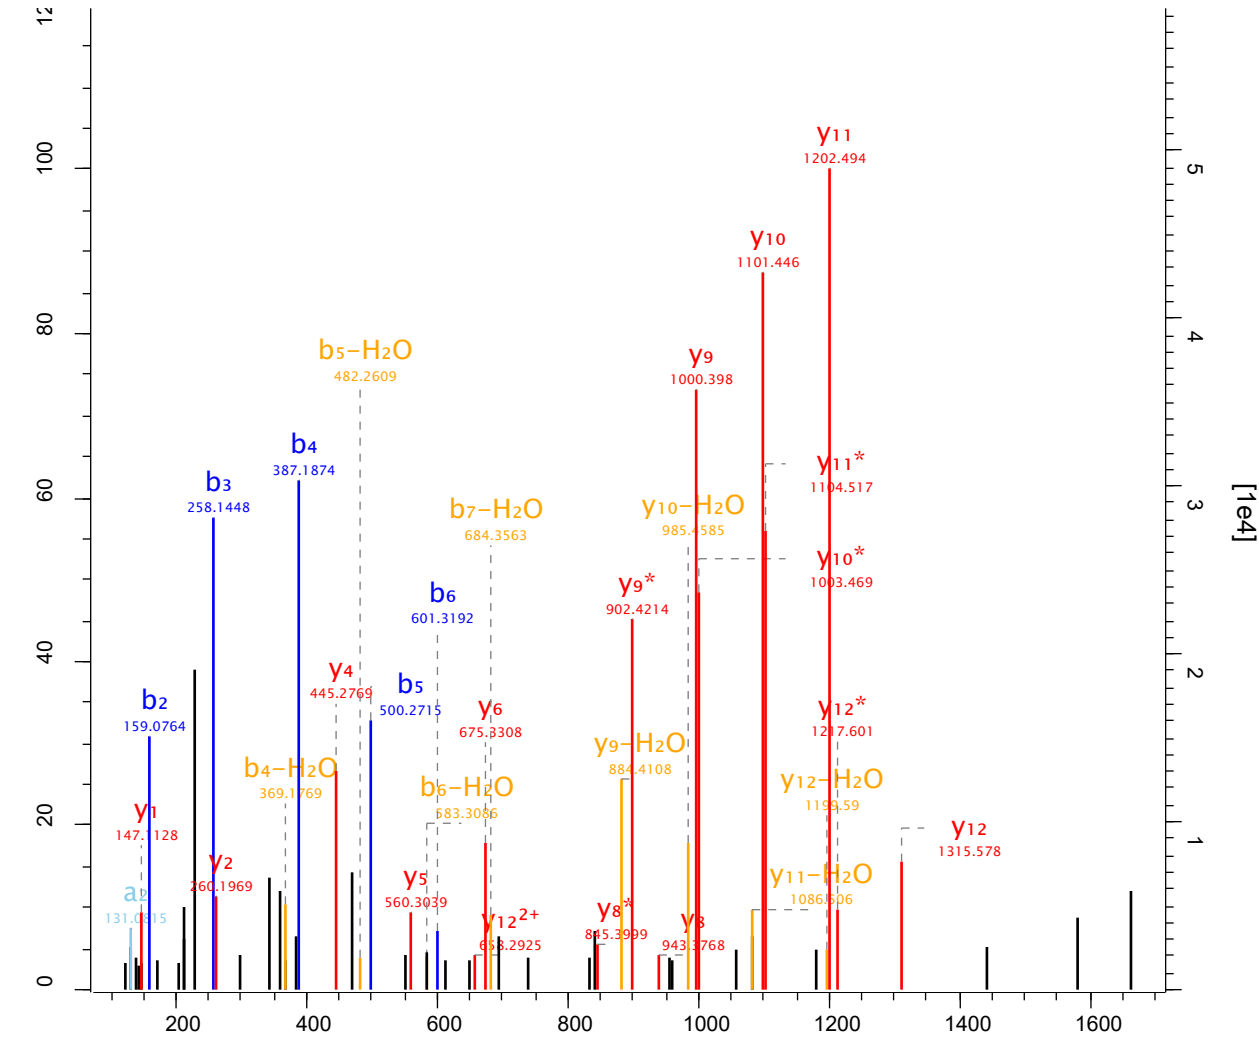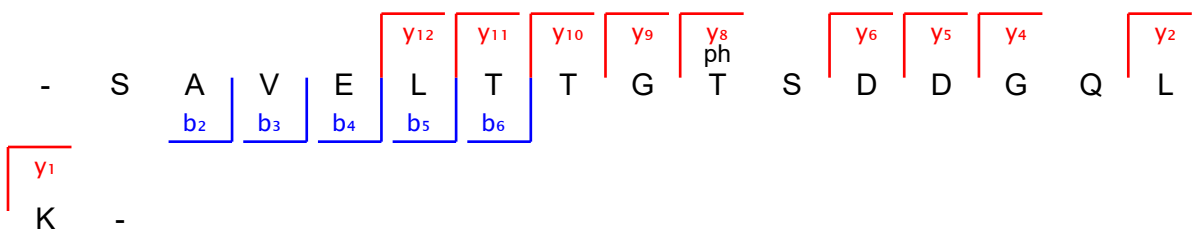

Raw file Scan Method Score m/z  
 sys\_15\_1 21660 FTMS; HCD 104.84 865.87

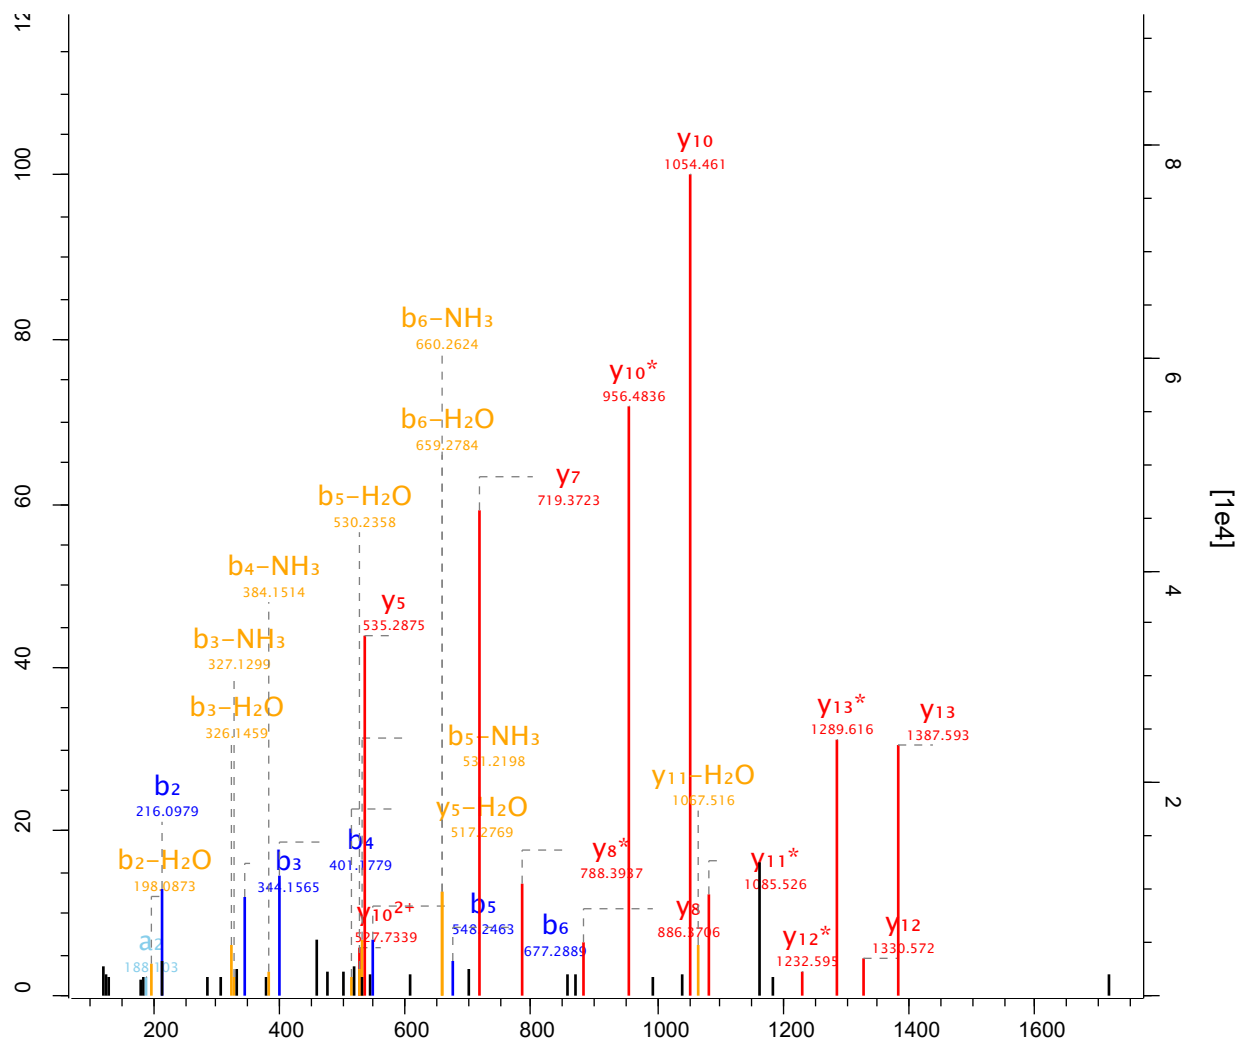

- N T Q G F E P A S P S P G S F

b<sub>2</sub>
b<sub>3</sub>
b<sub>4</sub>
b<sub>5</sub>
b<sub>6</sub>
y<sub>13</sub>
y<sub>12</sub>
y<sub>11</sub>\*
y<sub>10</sub>
y<sub>8</sub><sub>ph</sub>
y<sub>7</sub>
y<sub>5</sub>

K -

Raw file Scan Method Score m/z  
 sys\_15\_1 21760 FTMS; HCD 94.36 501.23

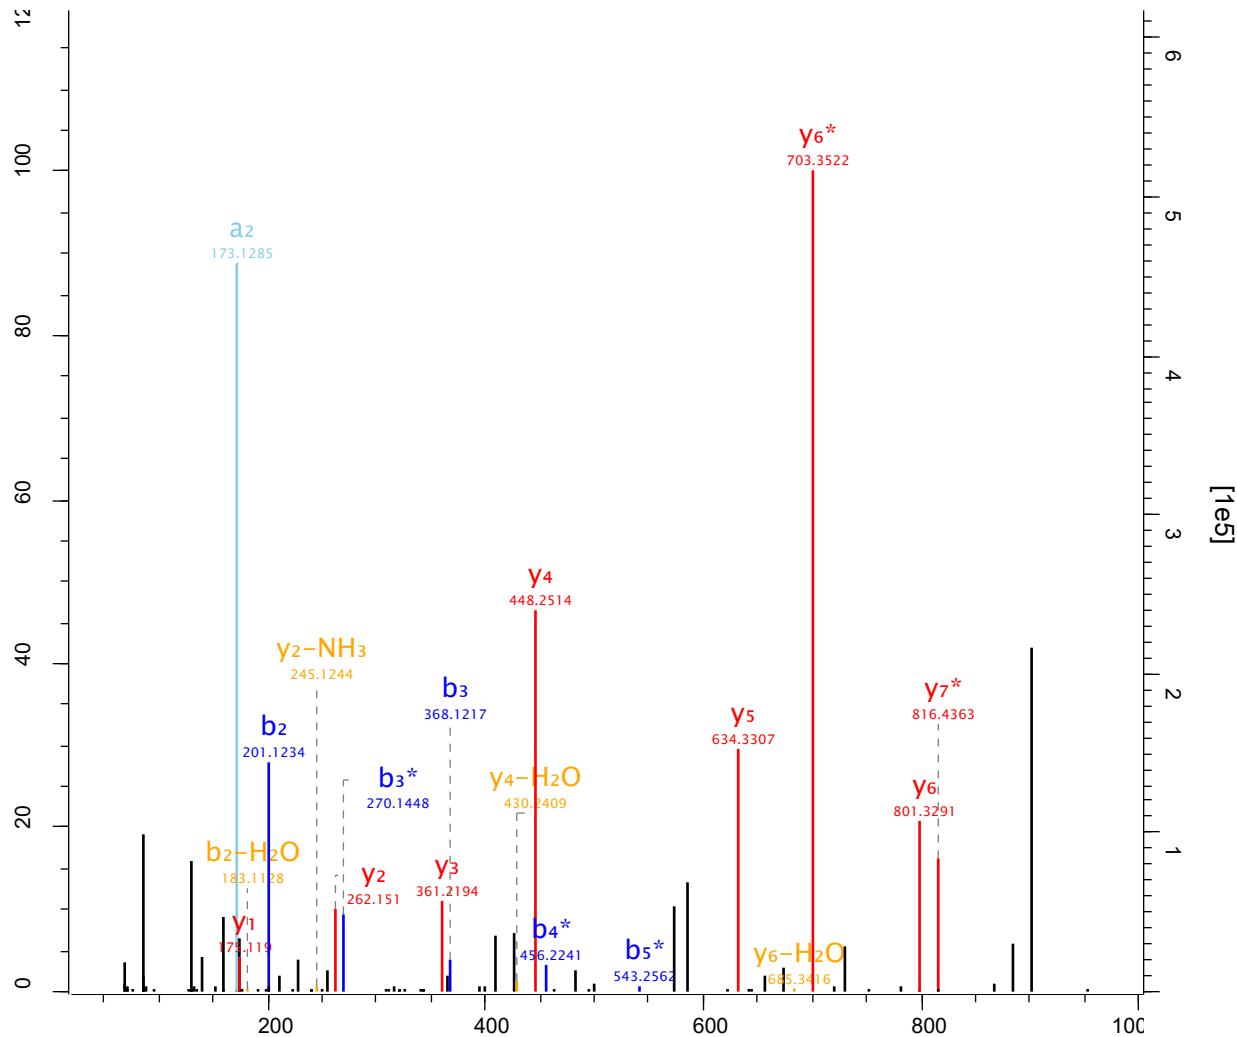

- S L W S V S R -

y<sub>7</sub>\*
y<sub>6</sub> ph
y<sub>5</sub>
y<sub>4</sub>
y<sub>3</sub>
y<sub>2</sub>
y<sub>1</sub>

b<sub>2</sub>
b<sub>3</sub>
b<sub>4</sub>\*
b<sub>5</sub>\*

Raw file Scan Method Score m/z  
 sys\_15\_1 21772 FTMS; HCD 64.71 707.3

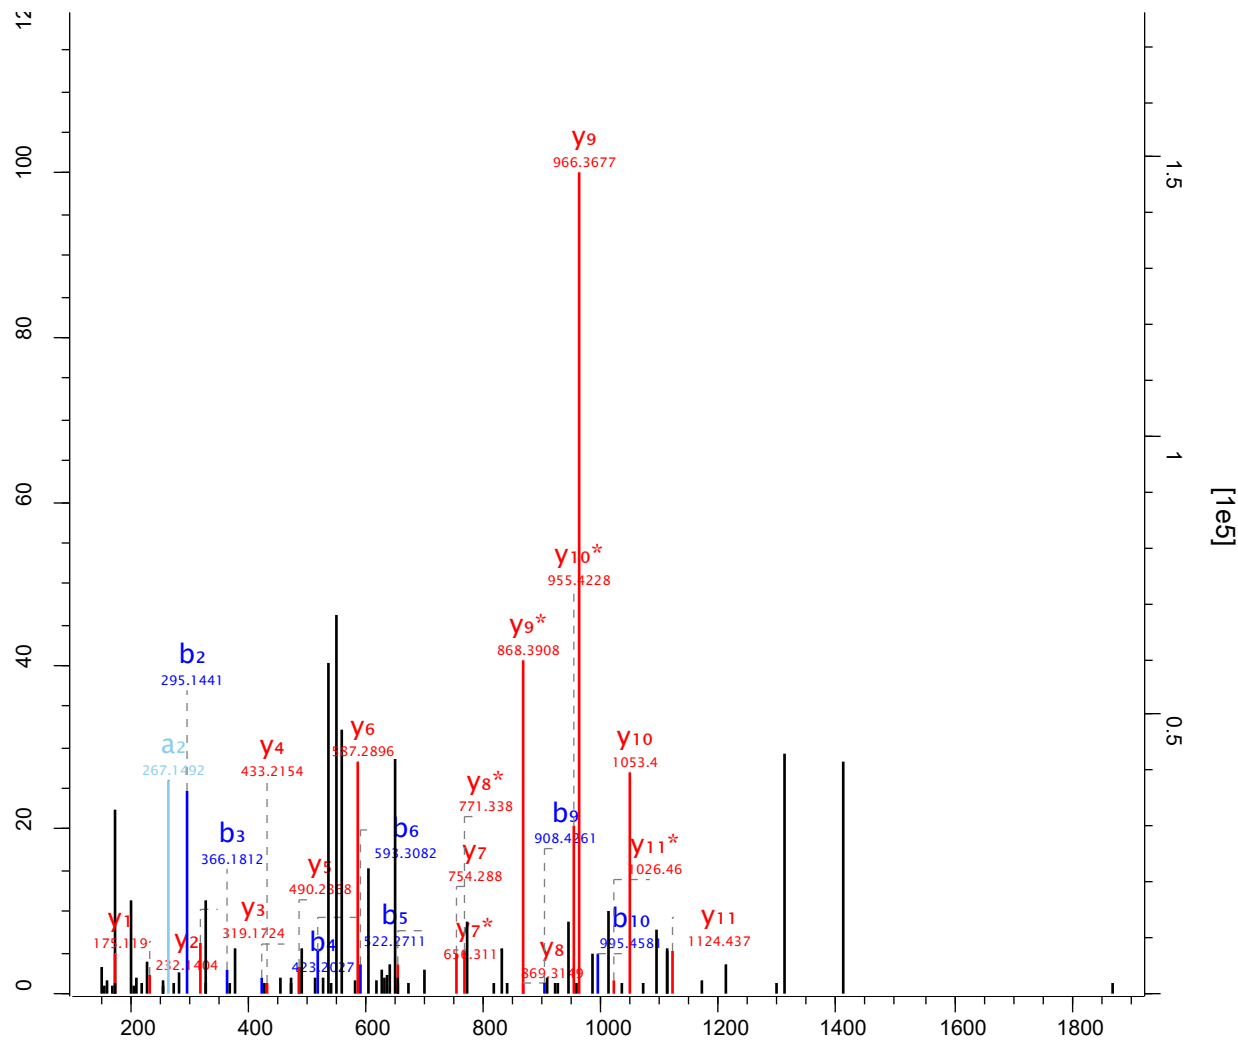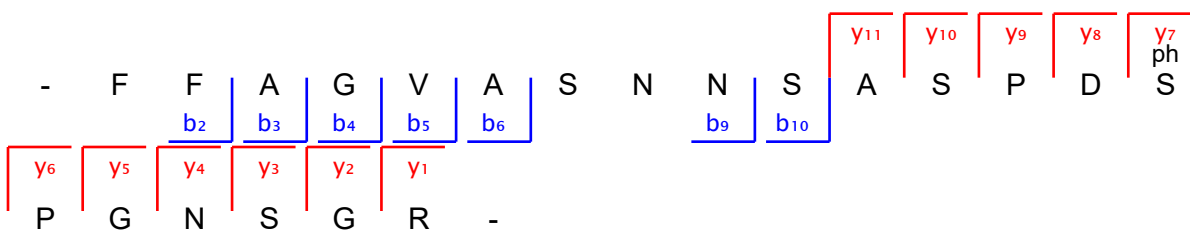

Raw file Scan Method Score m/z  
 sys\_15\_1 21780 FTMS; HCD 165.4 679.98

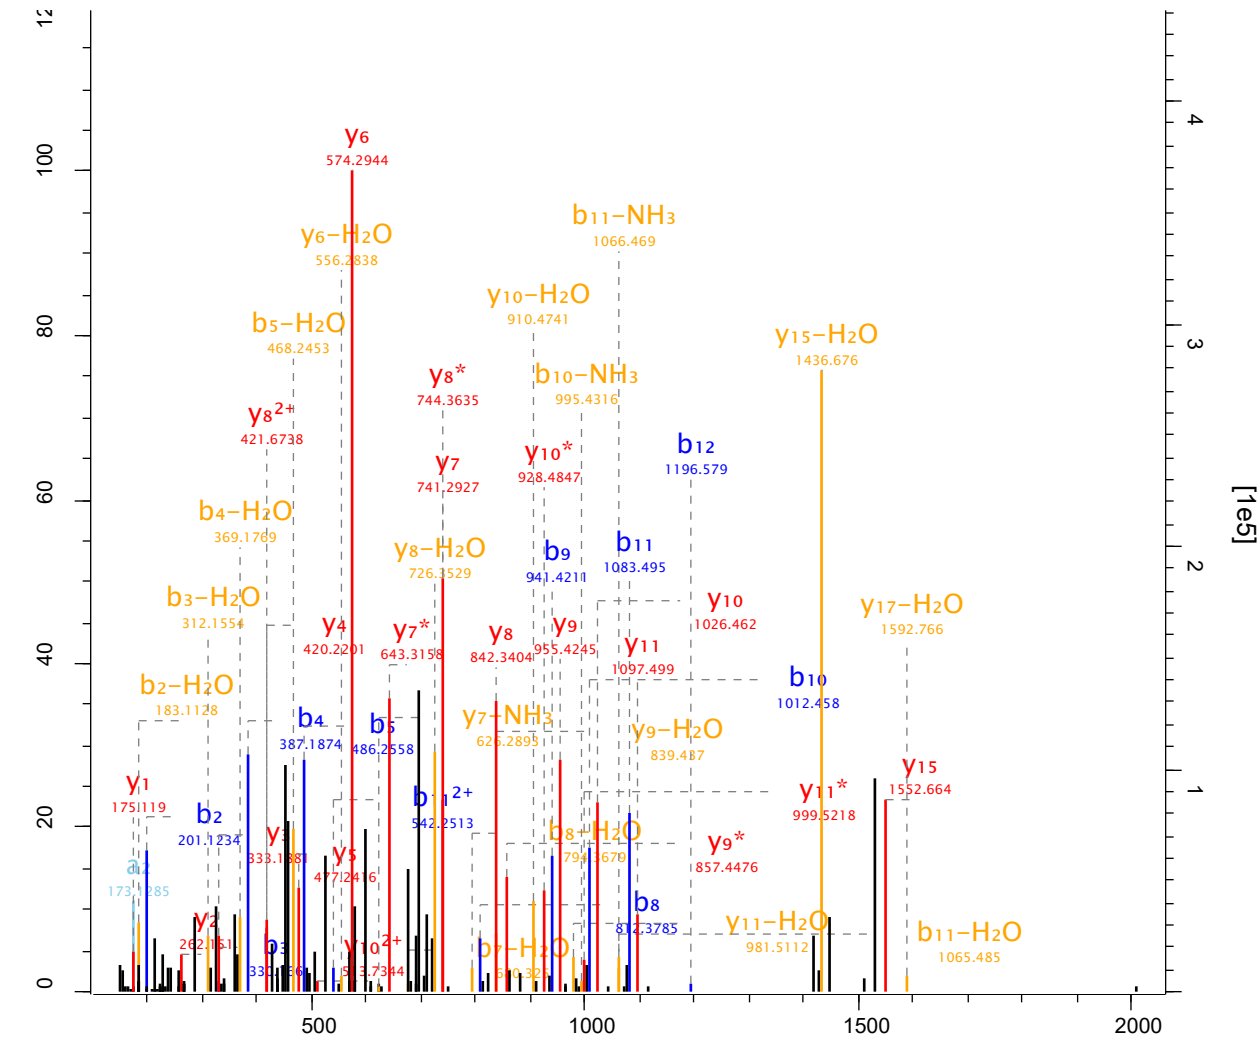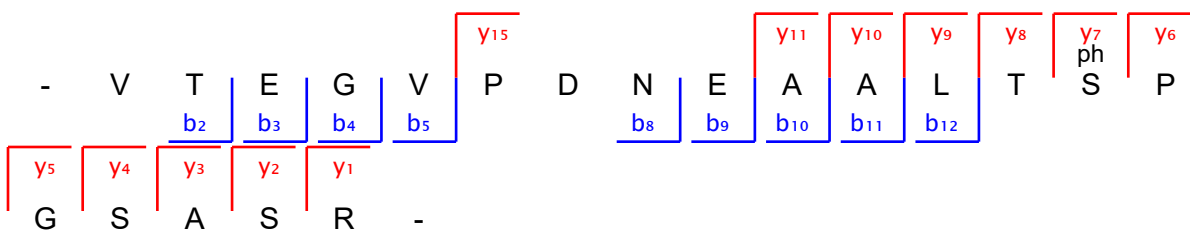

Raw file Scan Method Score m/z  
 sys\_15\_1 21863 FTMS; HCD 108.63 750.82

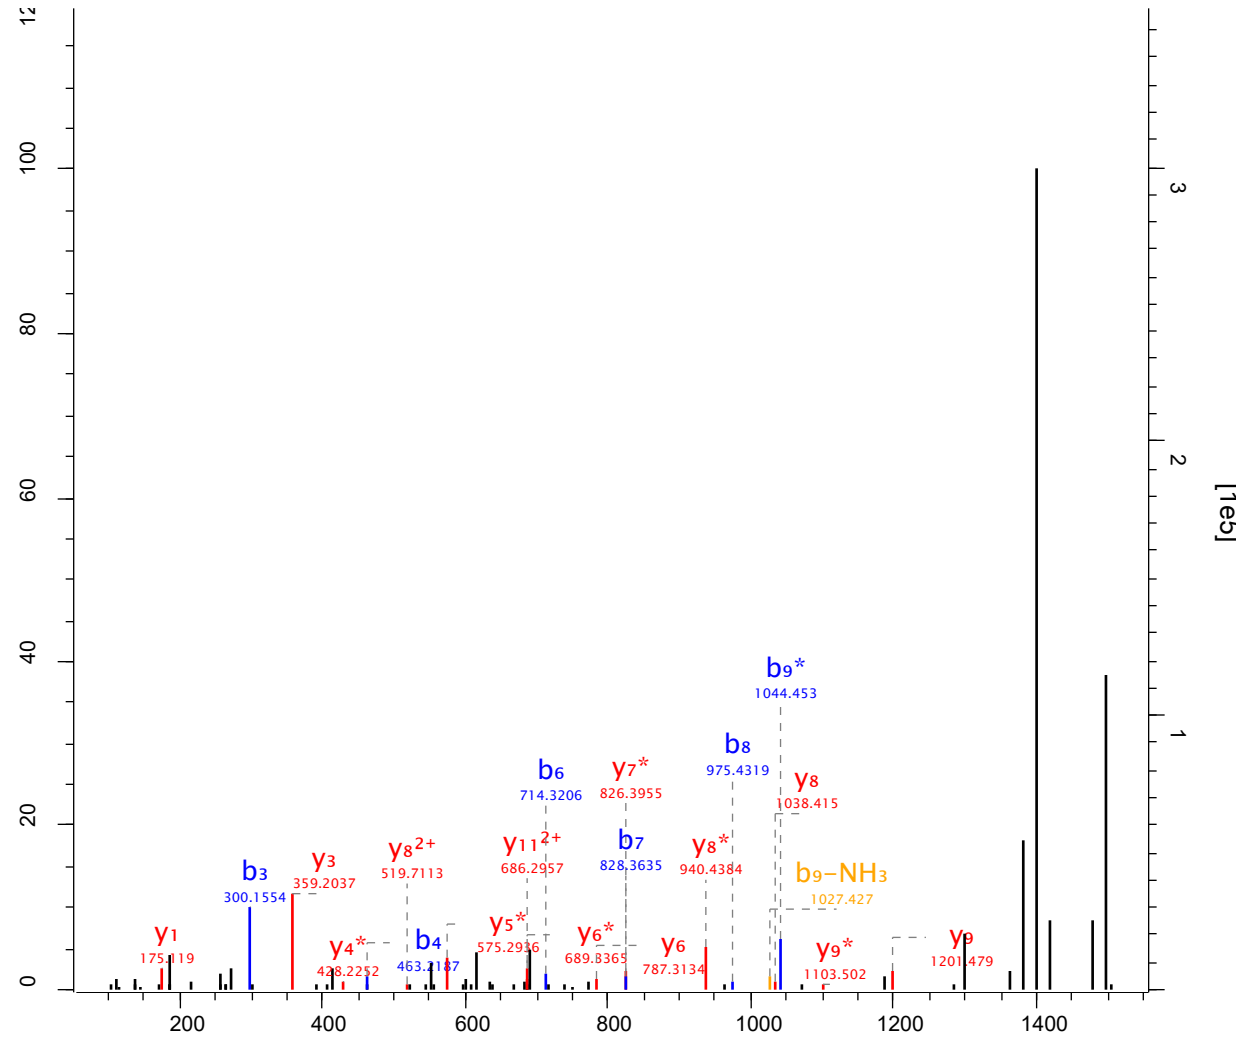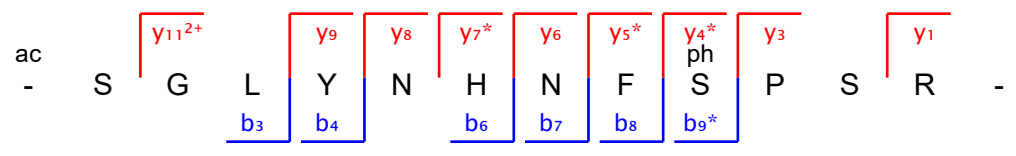



Raw file Scan Method Score m/z  
 sys\_15\_1 21888 FTMS; HCD 70.09 587.29

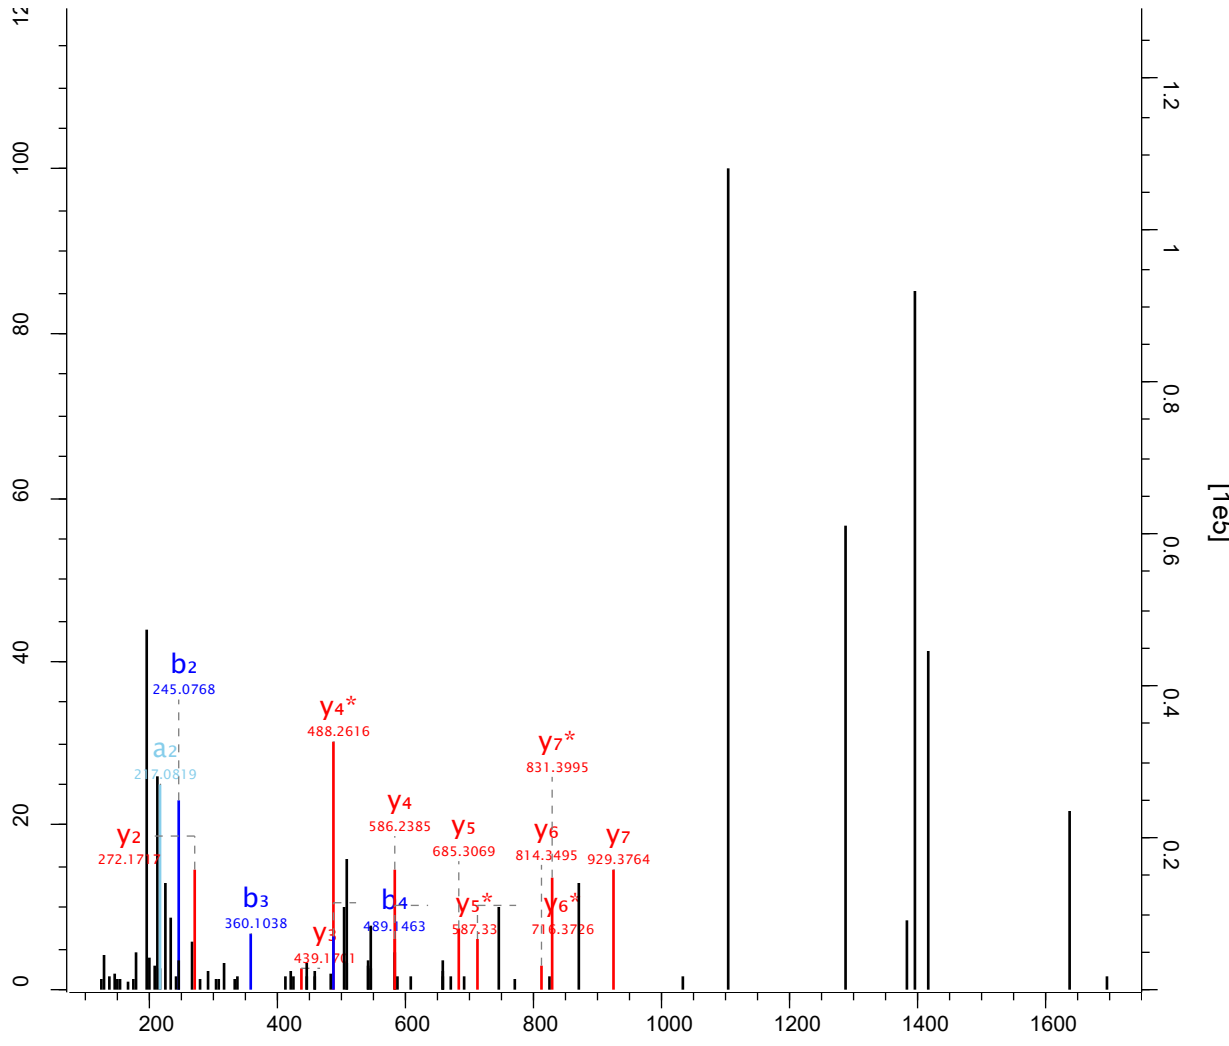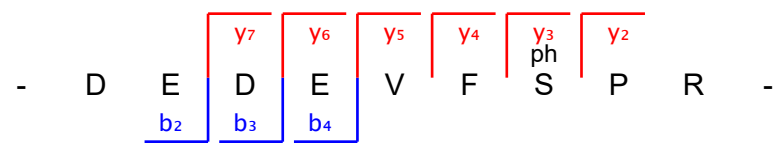

Raw file Scan Method Score m/z  
 sys\_15\_1 21920 FTMS; HCD 58.32 761.29

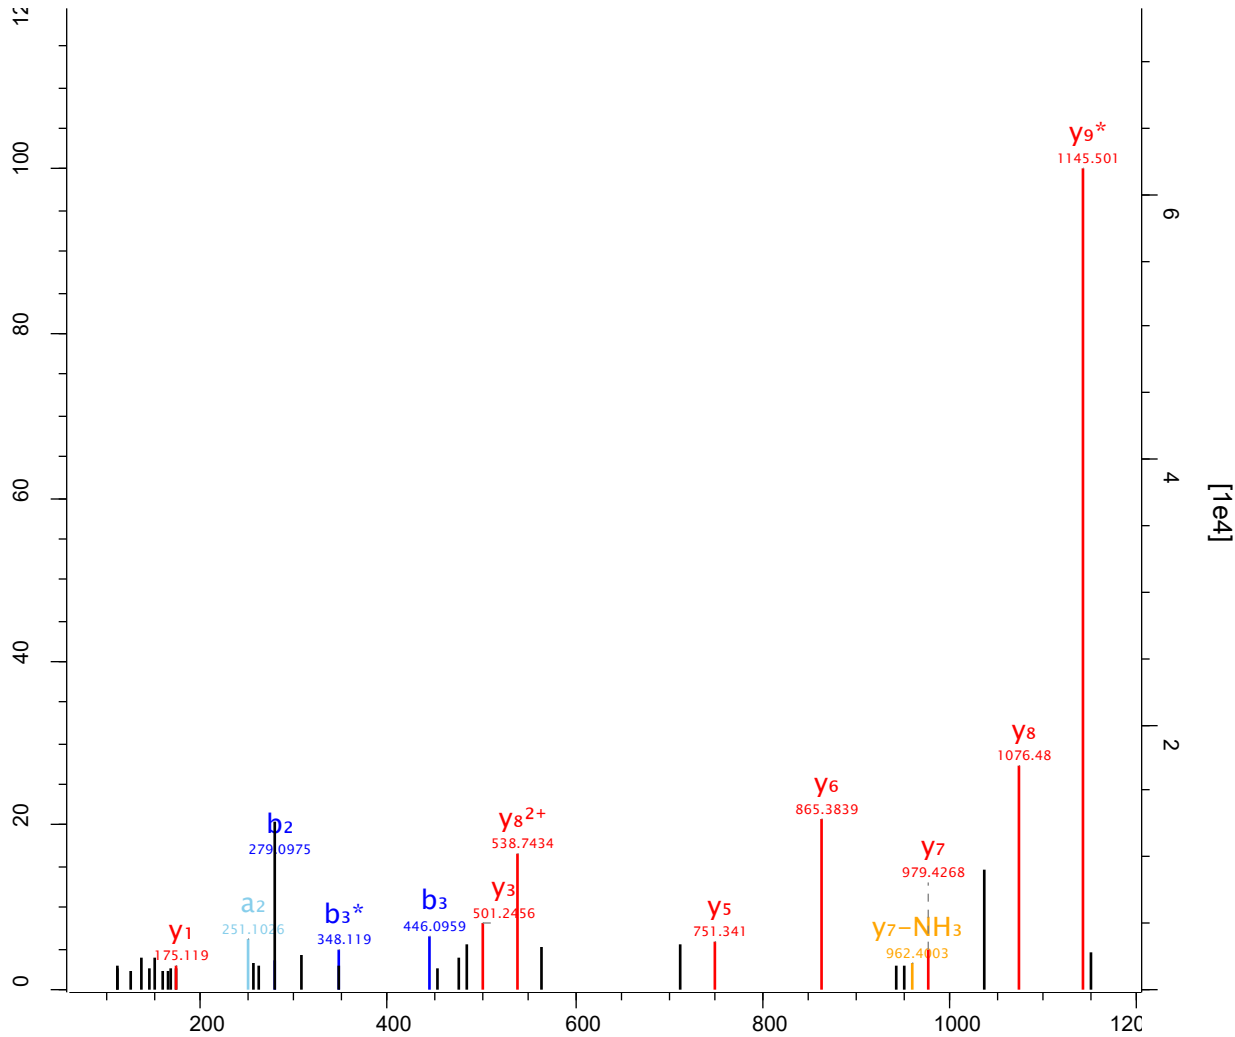

- D Y ph S P N N S Y Y Y R -

b2 b3
y9\*
y8
y7
y6
y5
y3
y1

Raw file Scan Method Score m/z  
 sys\_15\_1 21946 FTMS; HCD 96.21 796.35

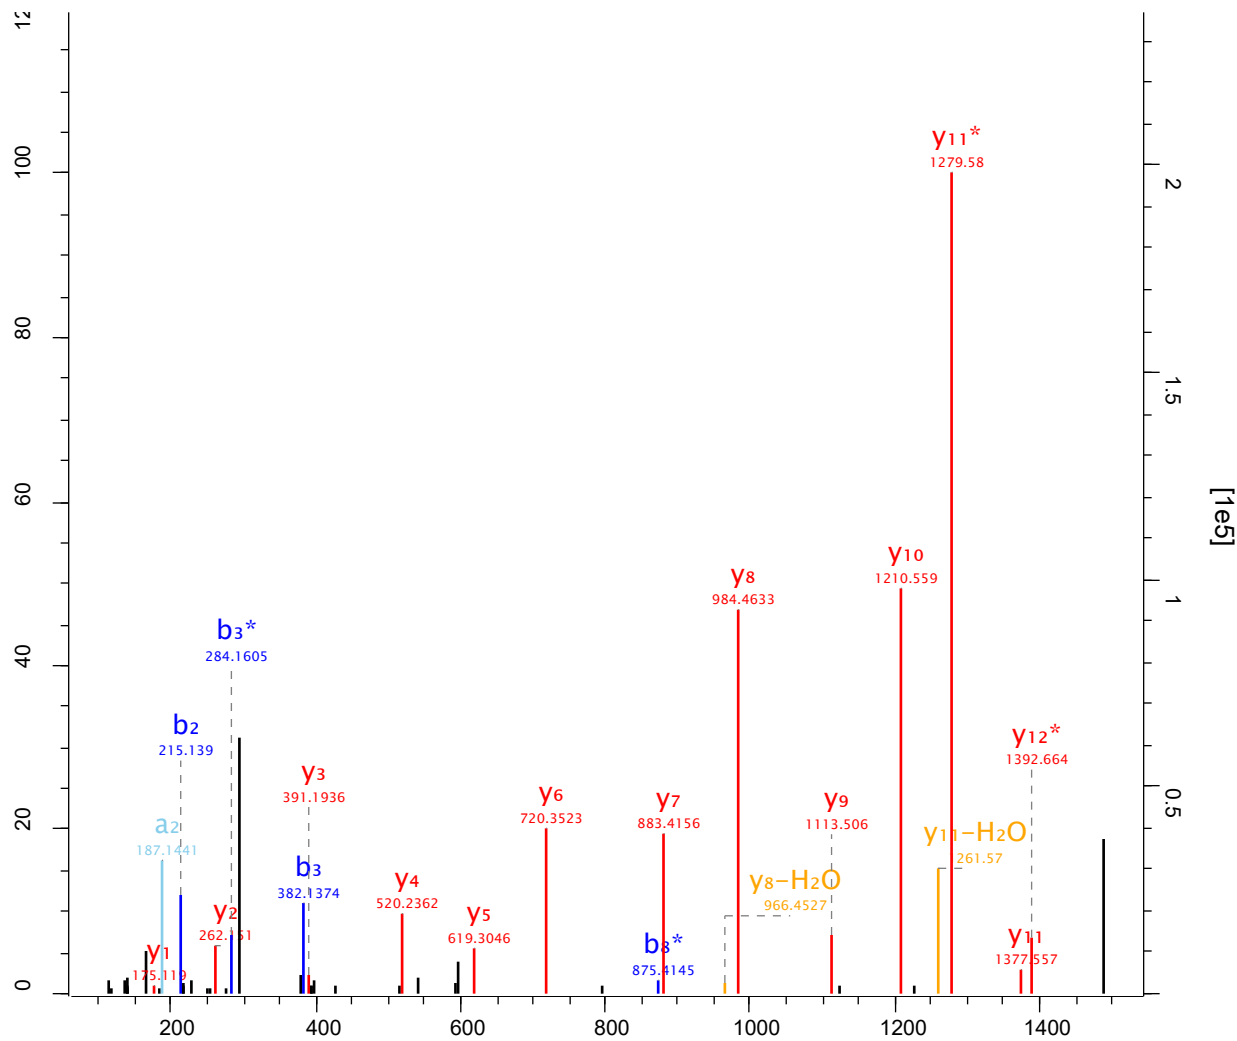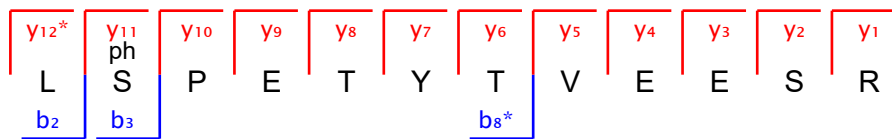

Raw file Scan Method Score m/z  
 sys\_15\_1 22049 FTMS; HCD 69.72 480.73

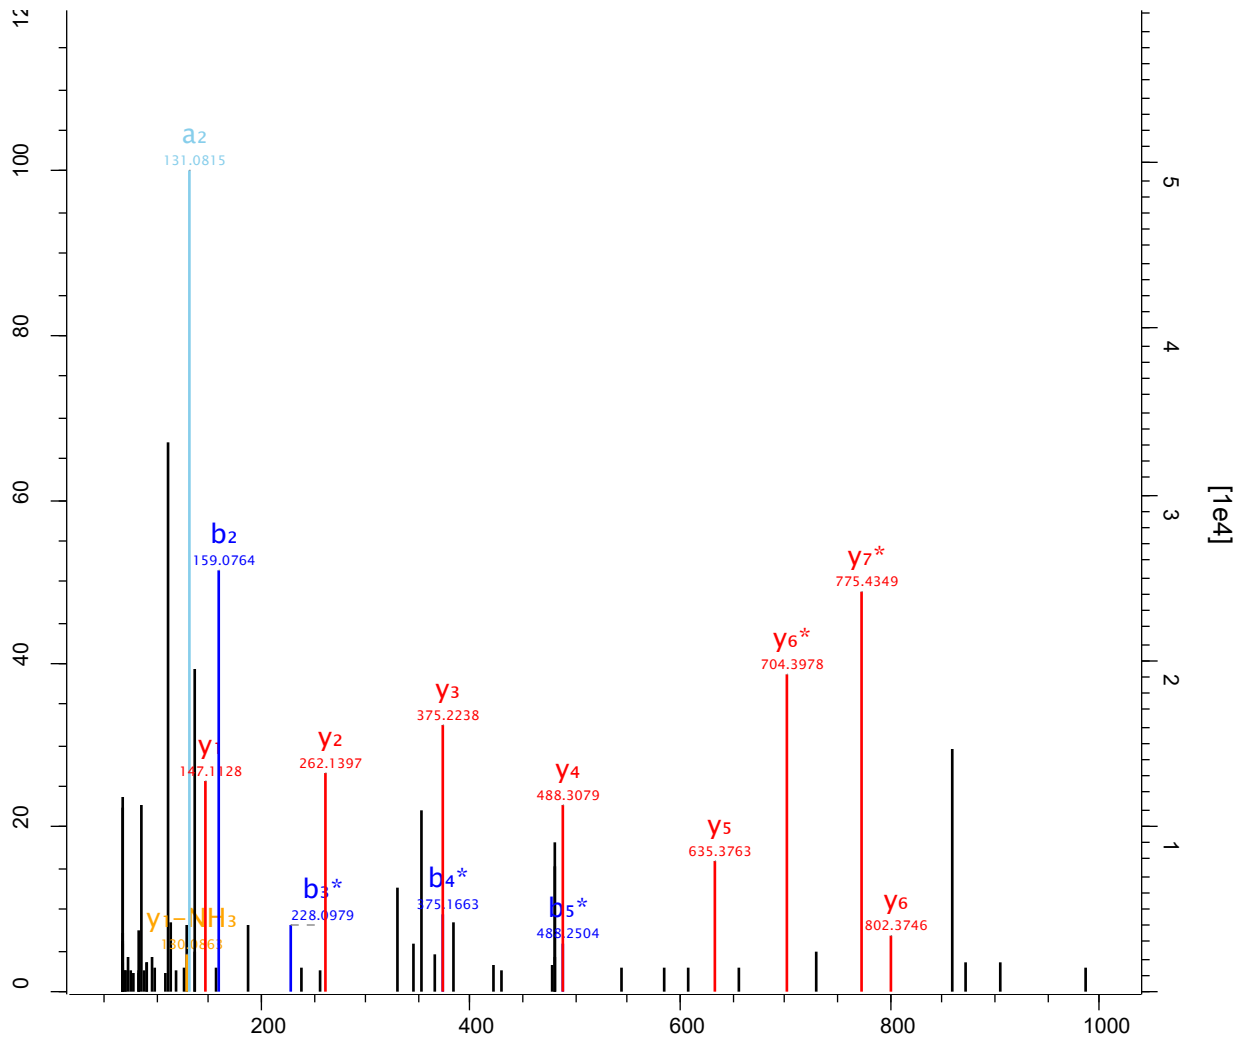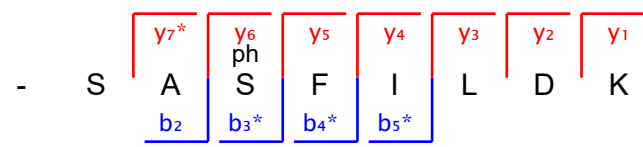

Raw file Scan Method Score m/z  
 sys\_15\_1 22102 FTMS; HCD 107.99 649.82

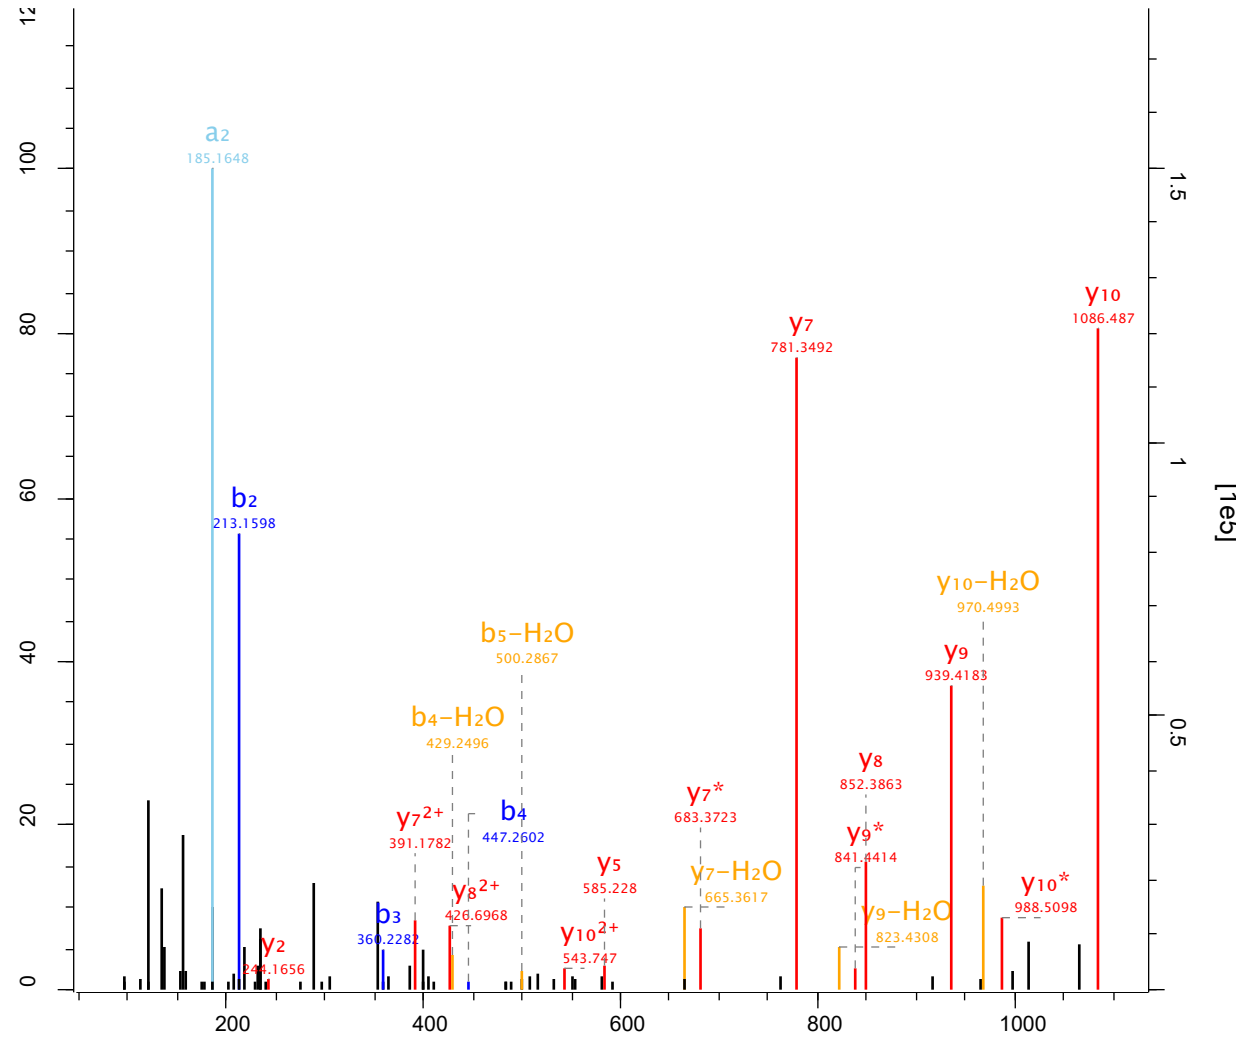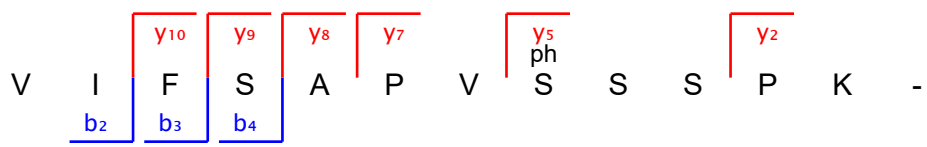

Raw file Scan Method Score m/z  
 sys\_15\_1 22126 FTMS; HCD 86.8 1005.38

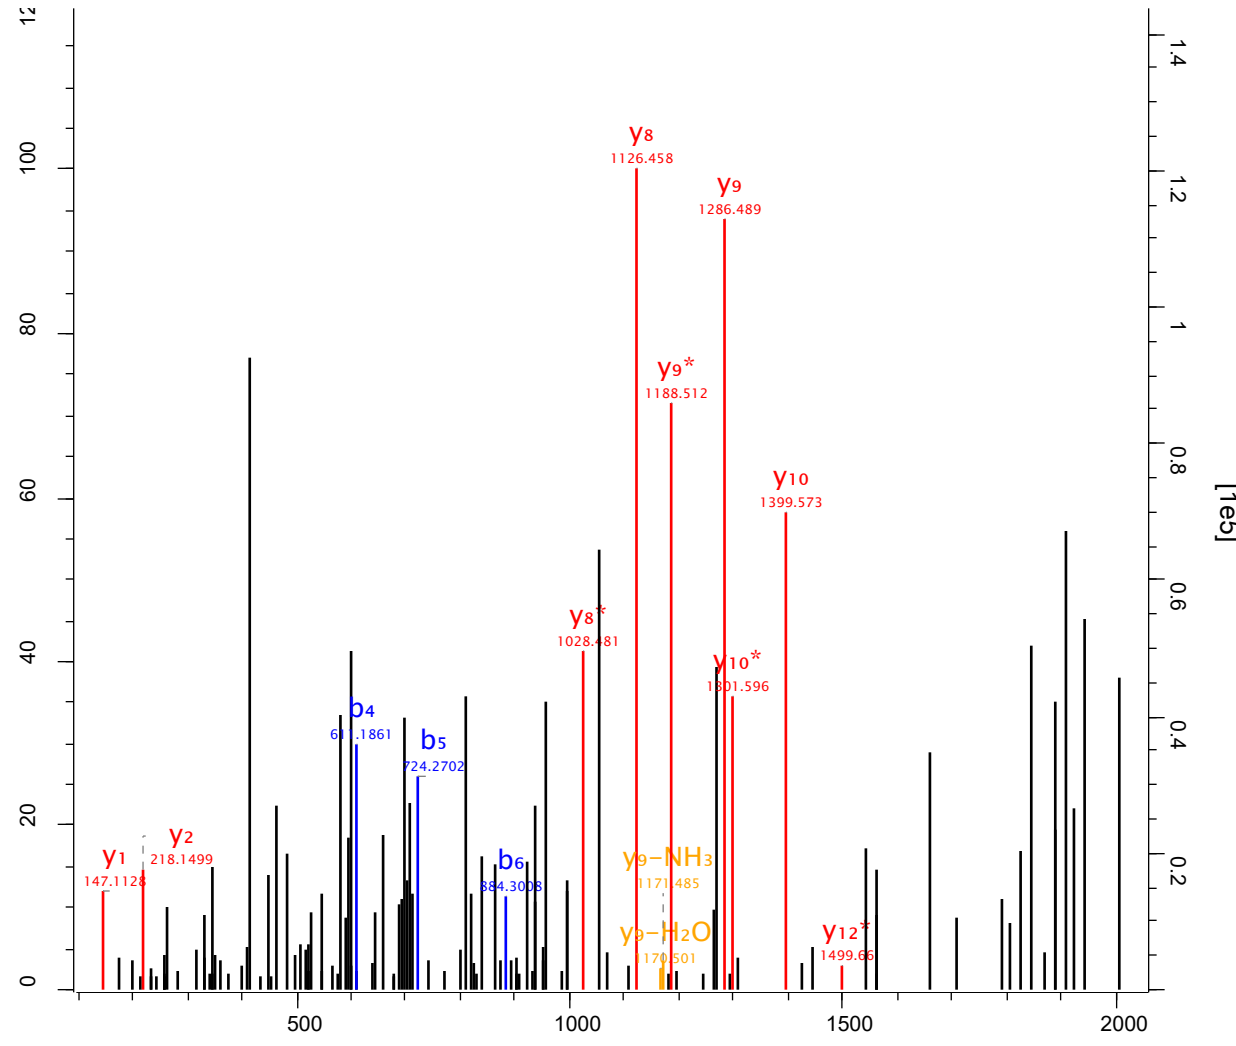

- Q W T D L C K ph S Y L Q E A K -

y12\* y10 y9 y8

b4 b5 b6

Raw file Scan Method Score m/z  
 sys\_15\_1 22130 FTMS; HCD 174.78 810.89

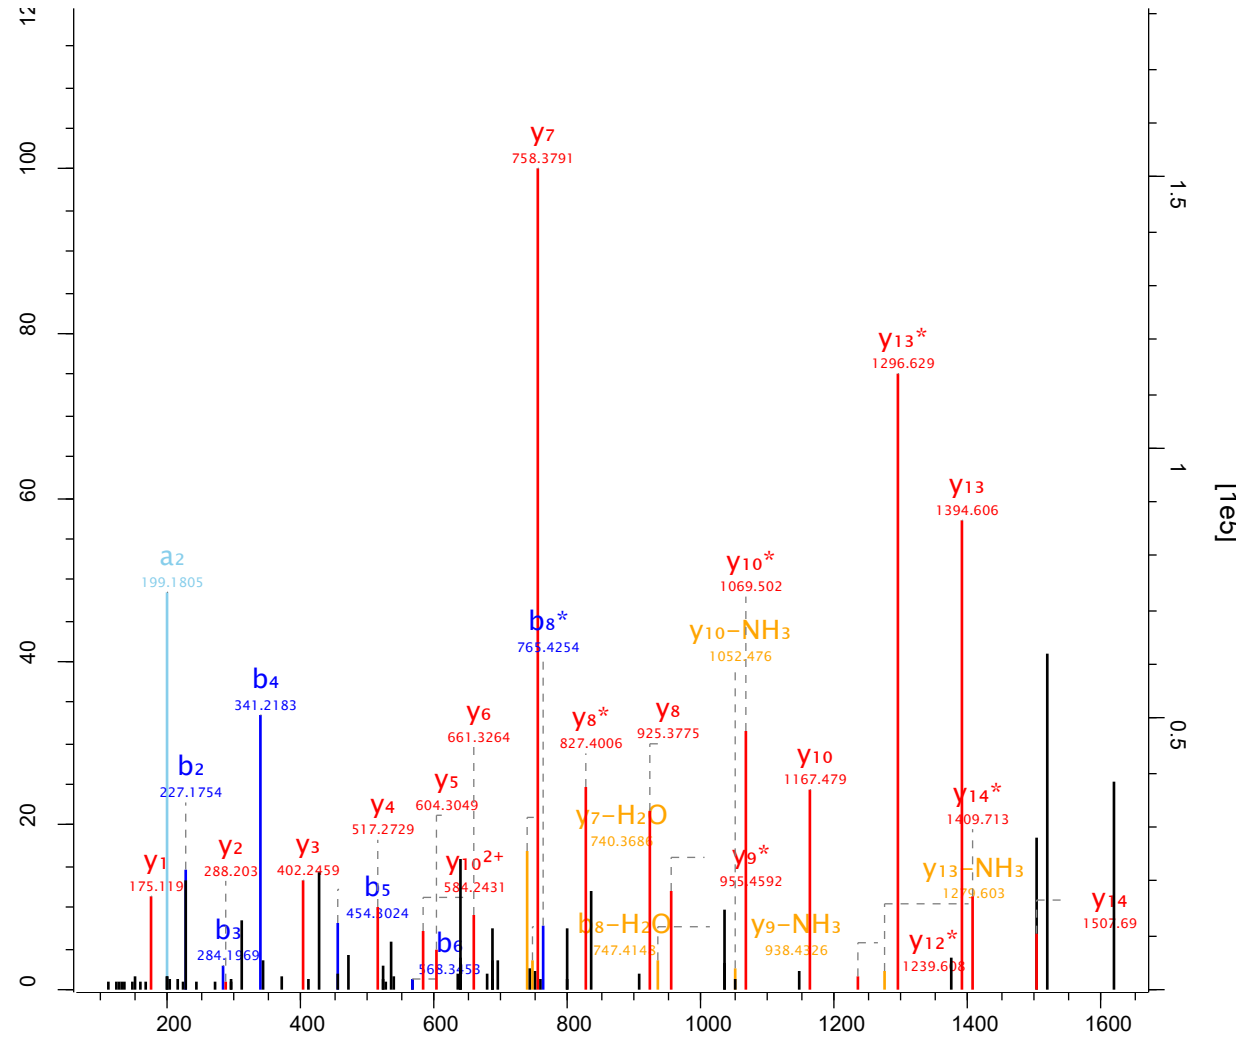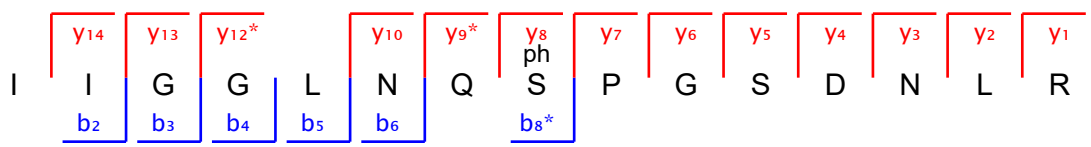

Raw file Scan Method Score m/z  
 sys\_15\_1 22140 FTMS; HCD 55.01 599.6

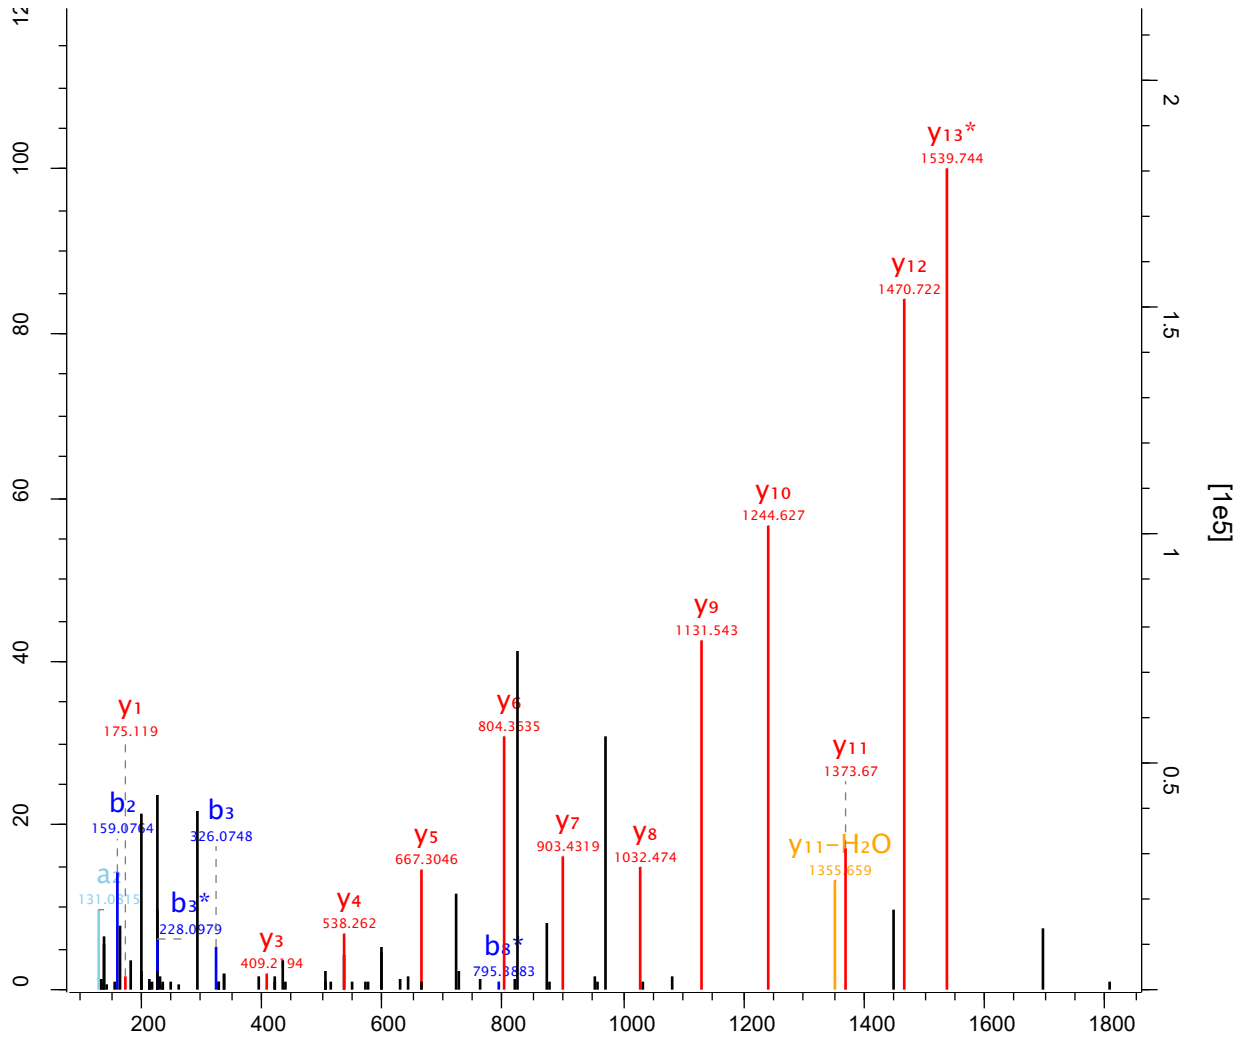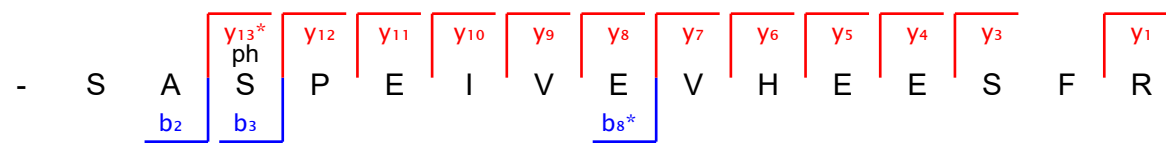



Raw file Scan Method Score m/z  
 sys\_15\_1 22159 FTMS; HCD 70.45 909.39

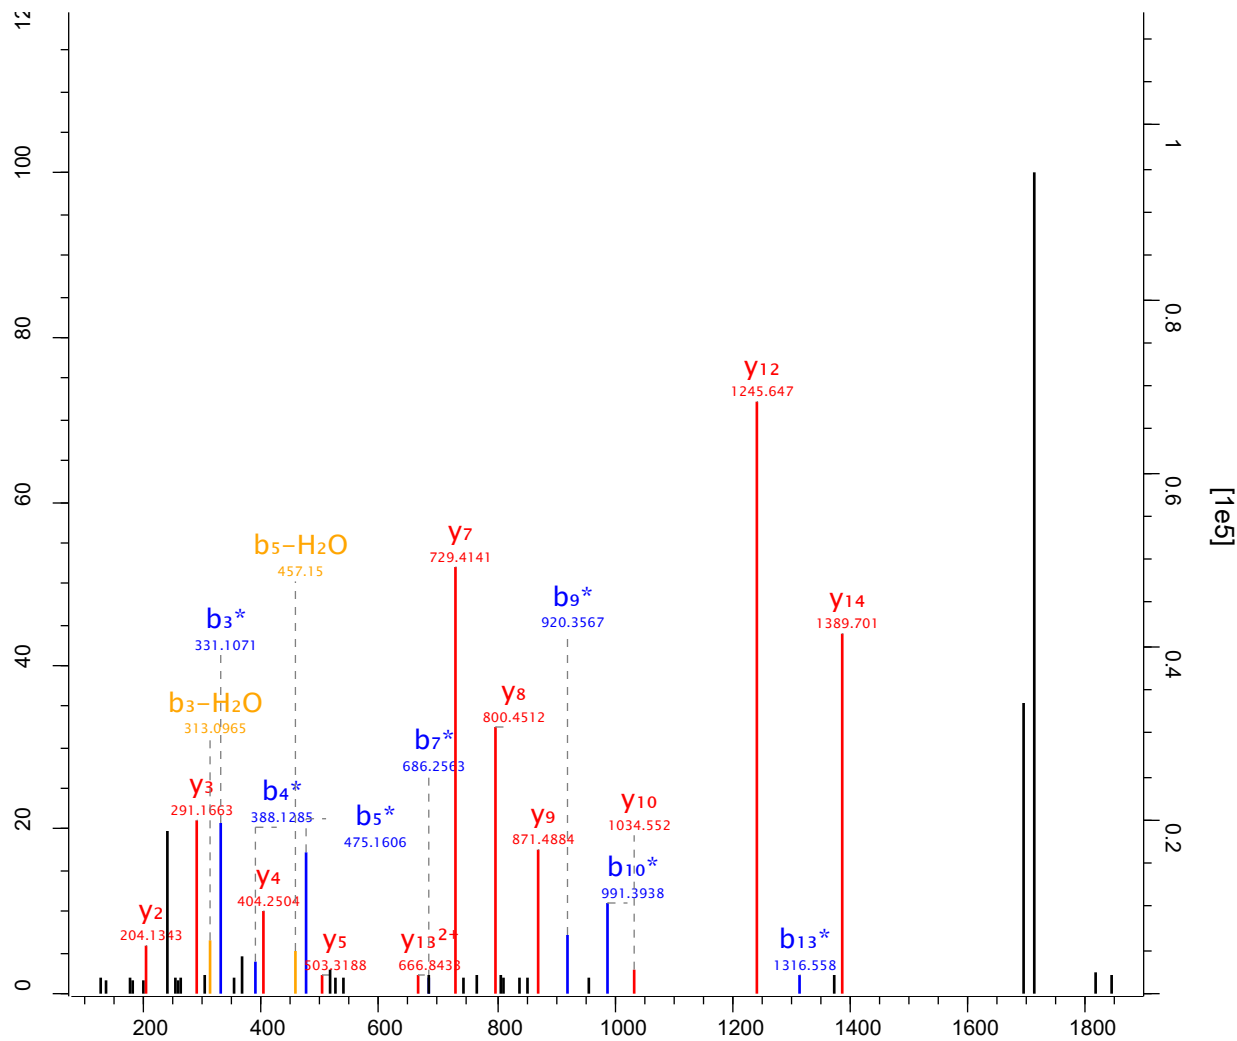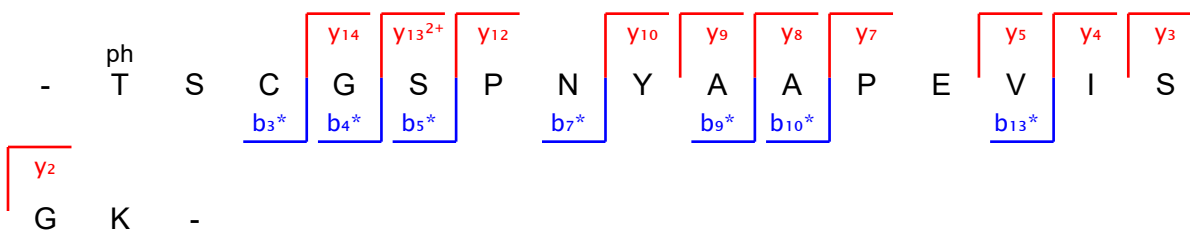

Raw file Scan Method Score m/z  
 sys\_15\_1 22245 FTMS; HCD 150.34 723.33

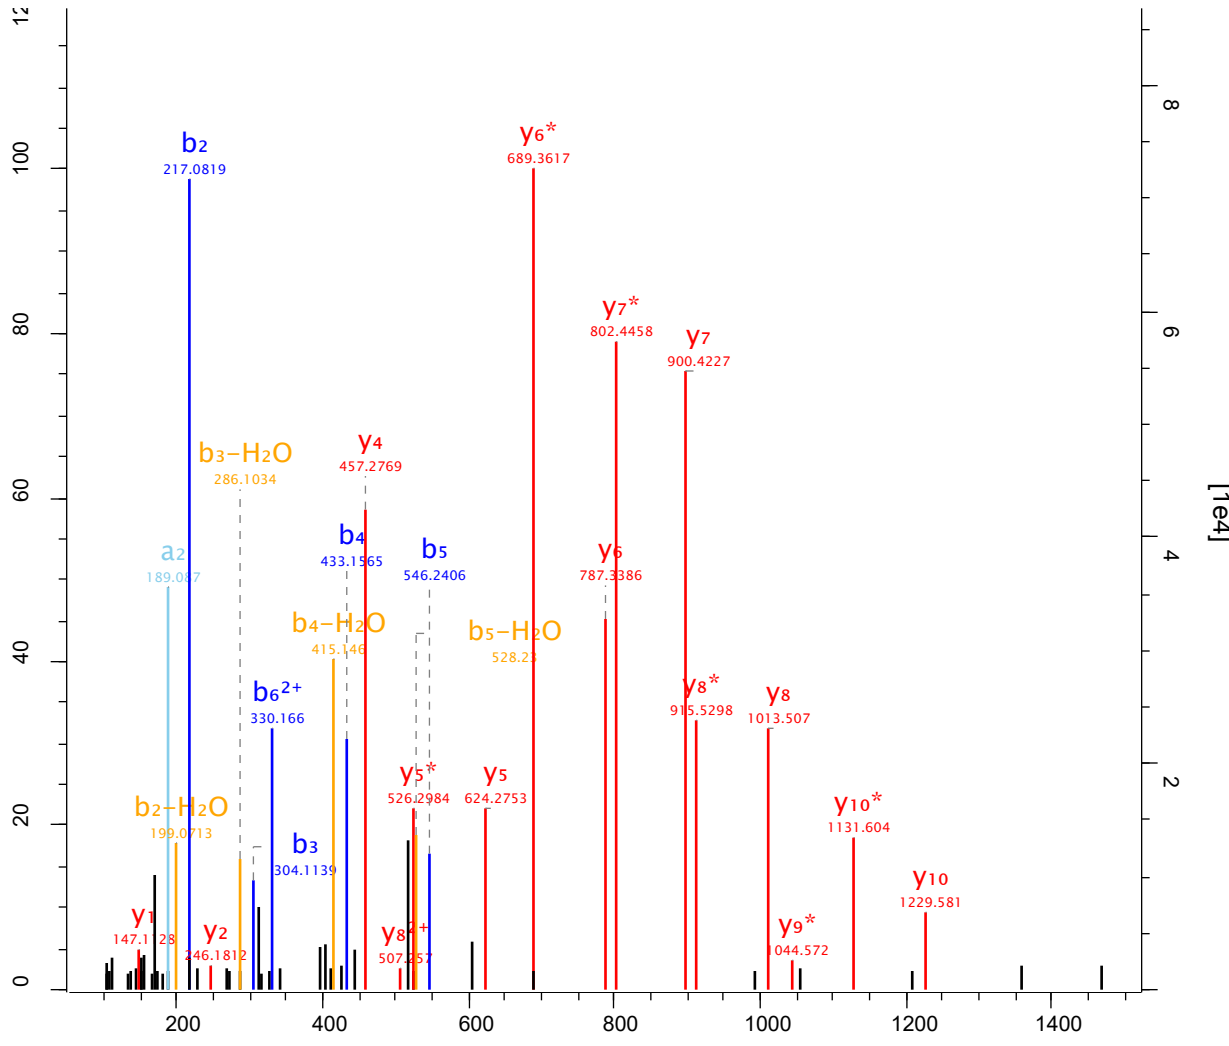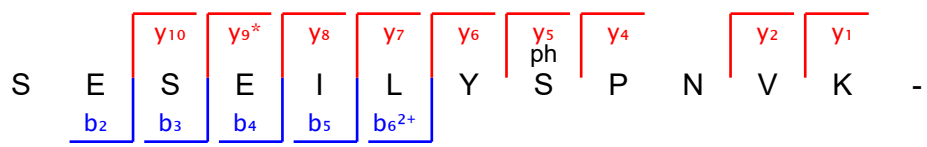

Raw file Scan Method Score m/z  
 sys\_15\_1 22365 FTMS; HCD 134.52 827.82

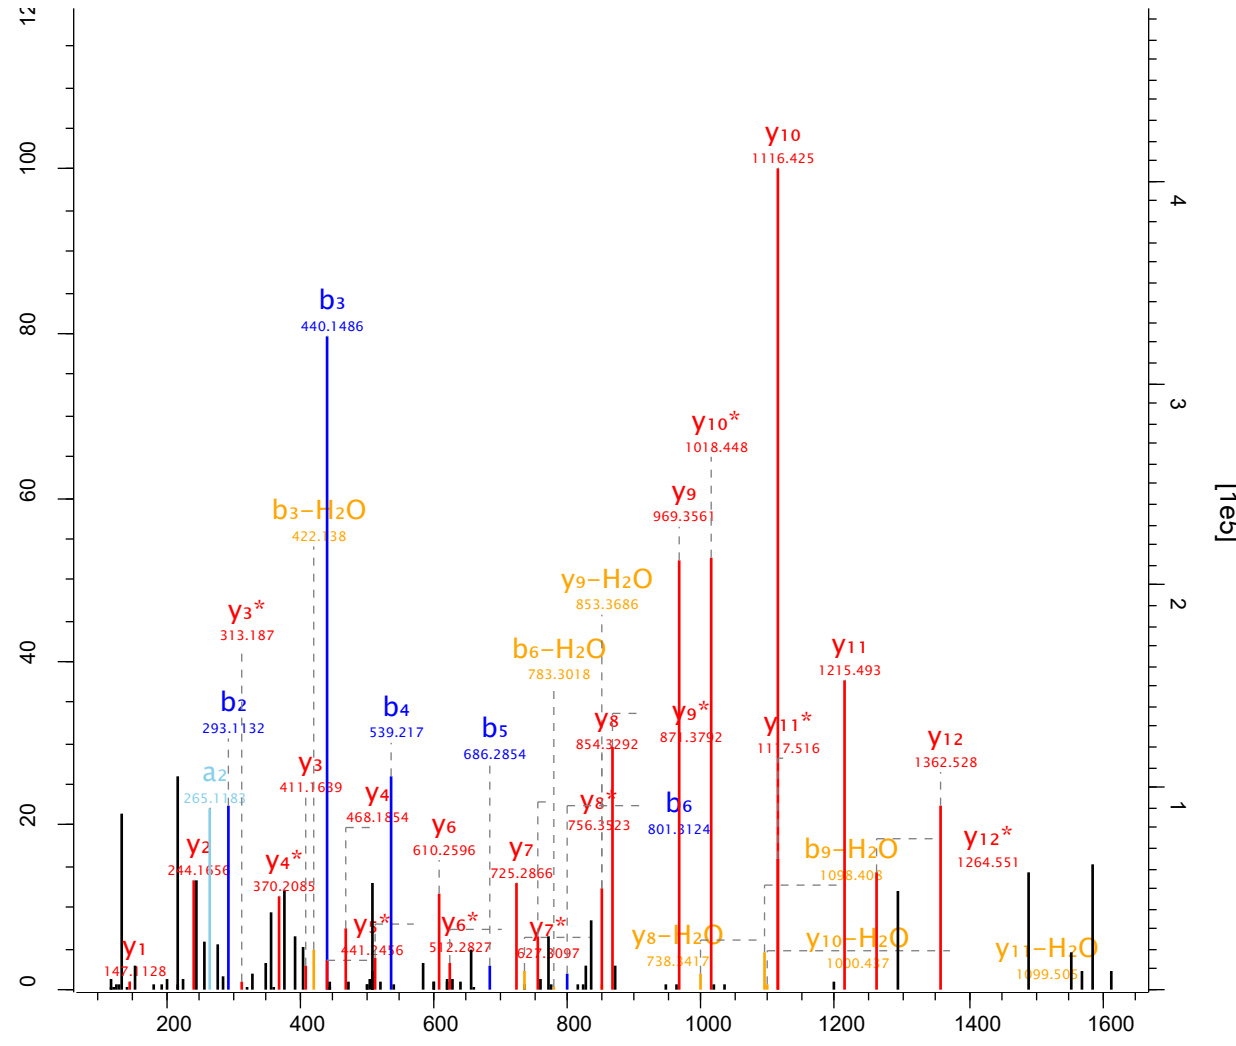

- Y E M V F D E D A A G S P K -

b<sub>2</sub>
b<sub>3</sub>
b<sub>4</sub>
b<sub>5</sub>
b<sub>6</sub>
y<sub>12</sub>
OX
y<sub>11</sub>
y<sub>10</sub>
y<sub>9</sub>
y<sub>8</sub>
y<sub>7</sub>
y<sub>6</sub>
y<sub>5</sub>\*
y<sub>4</sub>
y<sub>3</sub>
ph
y<sub>2</sub>
y<sub>1</sub>

| Raw file | Scan | Method    | Score | m/z   |
|----------|------|-----------|-------|-------|
| sys_15_1 | 2250 | FTMS; HCD | 48.57 | 405.5 |

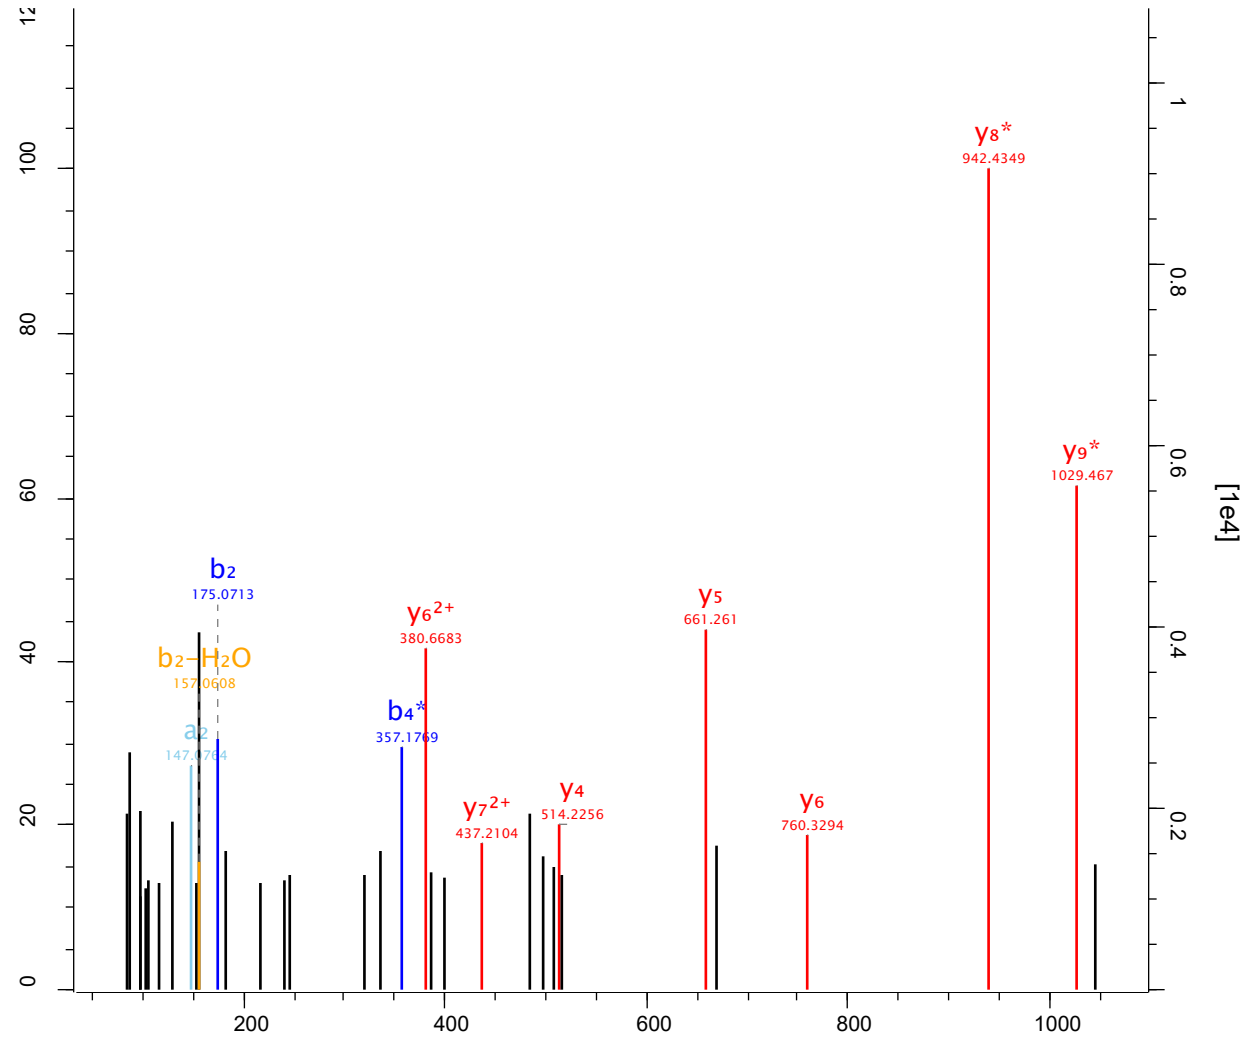

- S S S I V M D D H K -

y9\*
y8\*  
ph
y7-2+
y6
y5  
ox
y4

b2
b4\*

Raw file Scan Method Score m/z  
 sys\_15\_1 22527 FTMS; HCD 59.71 636.8

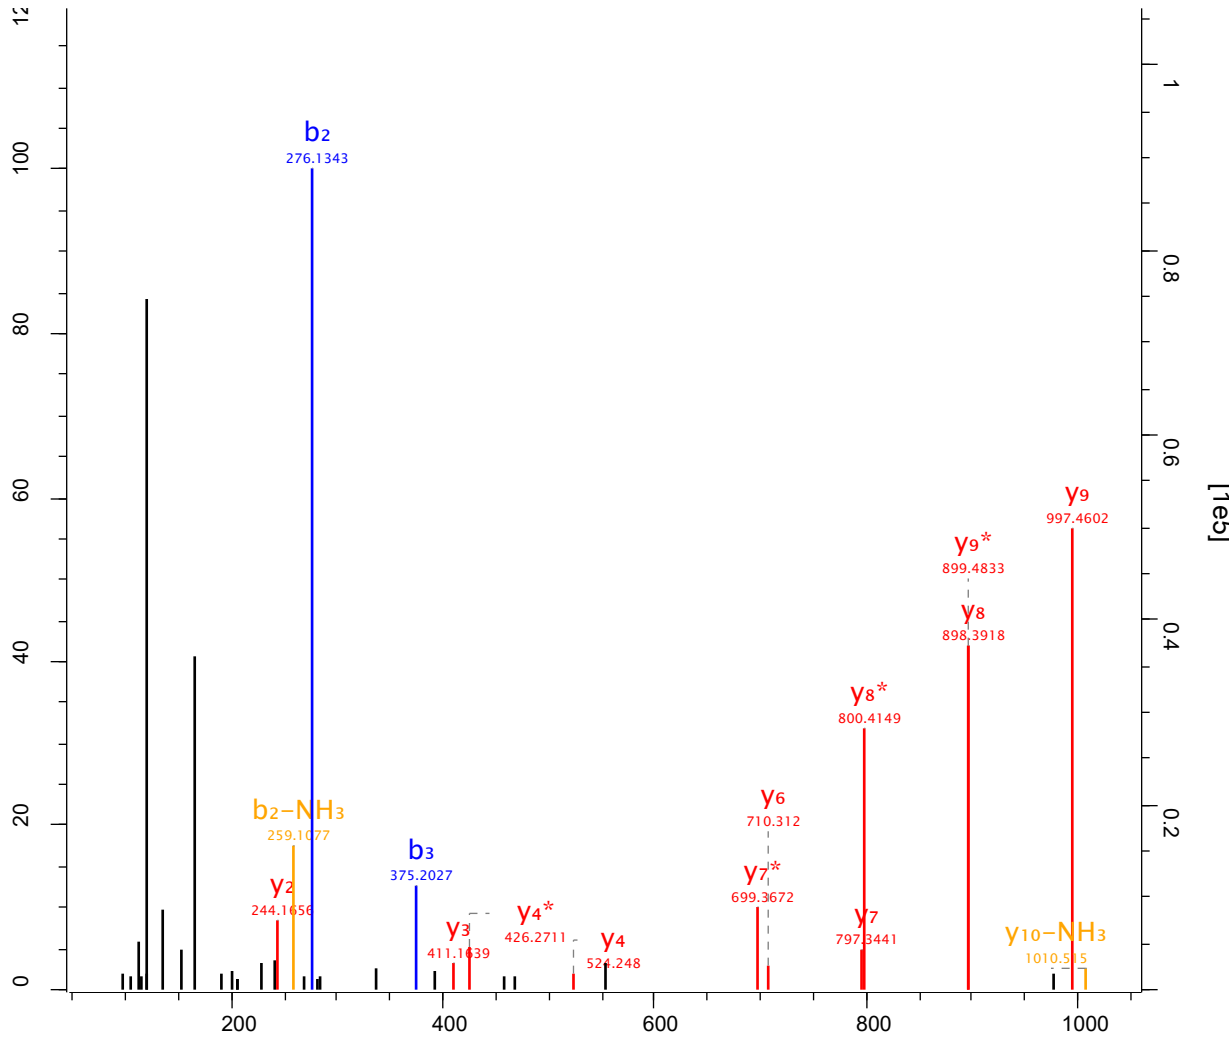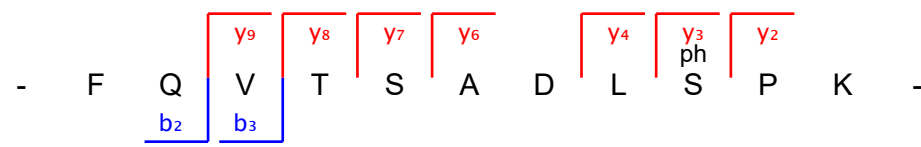

Raw file Scan Method Score m/z  
 sys\_15\_1 22543 FTMS; HCD 63.19 436.91

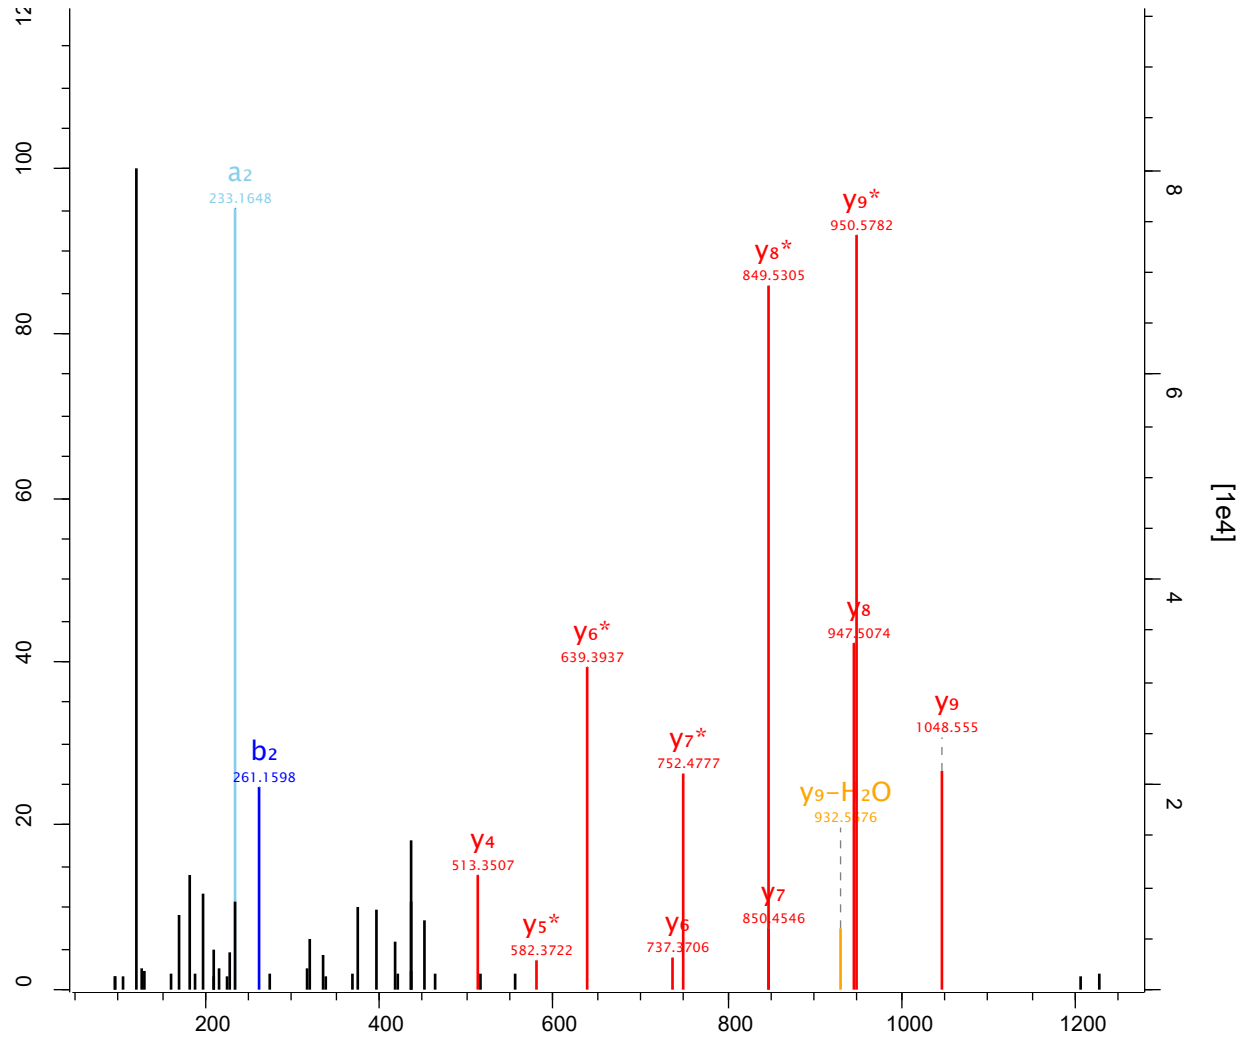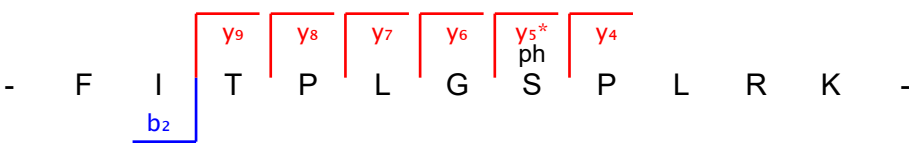

| Raw file | Scan  | Method    | Score | m/z    |
|----------|-------|-----------|-------|--------|
| sys_15_1 | 22596 | FTMS; HCD | 42.47 | 581.74 |

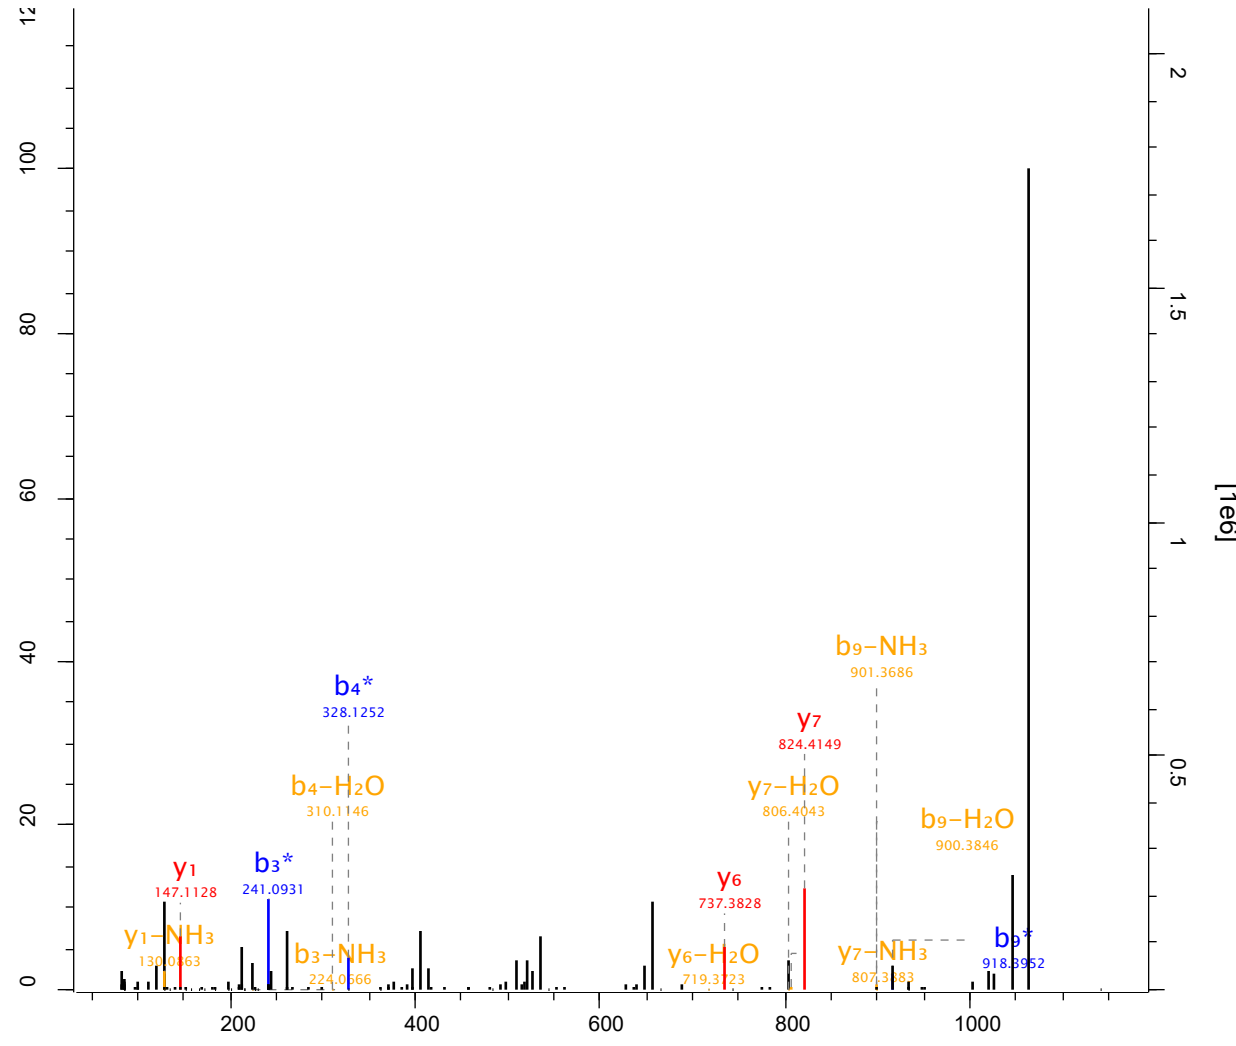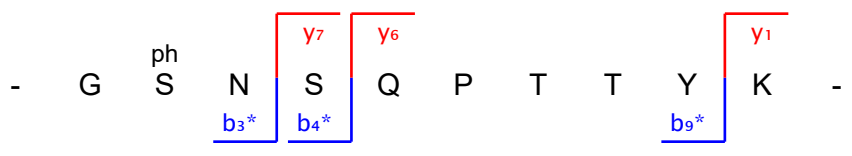

Raw file Scan Method Score m/z  
 sys\_15\_1 22703 FTMS; HCD 151.42 626.96

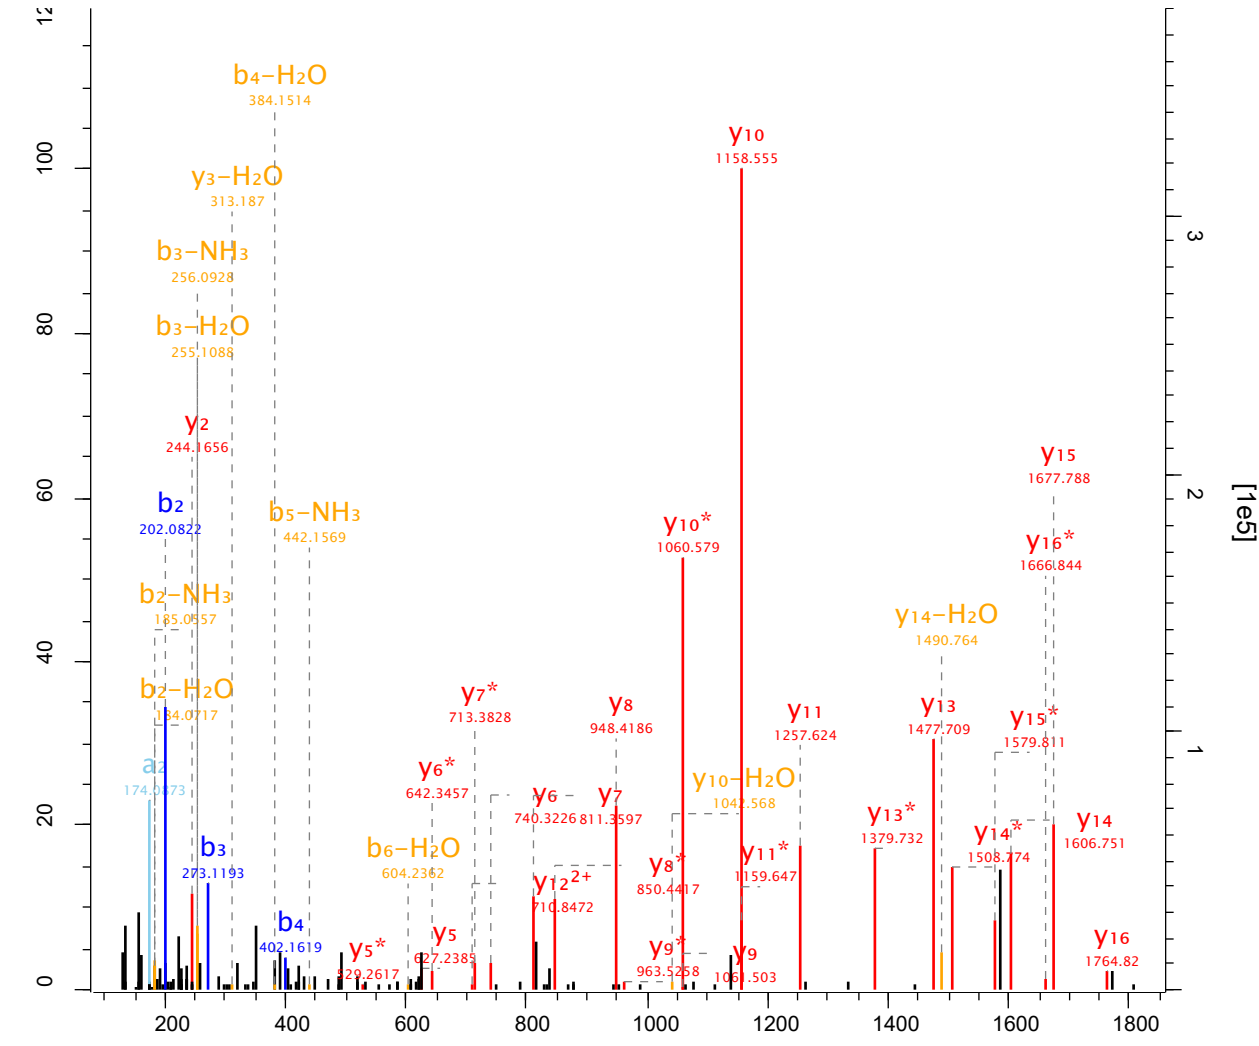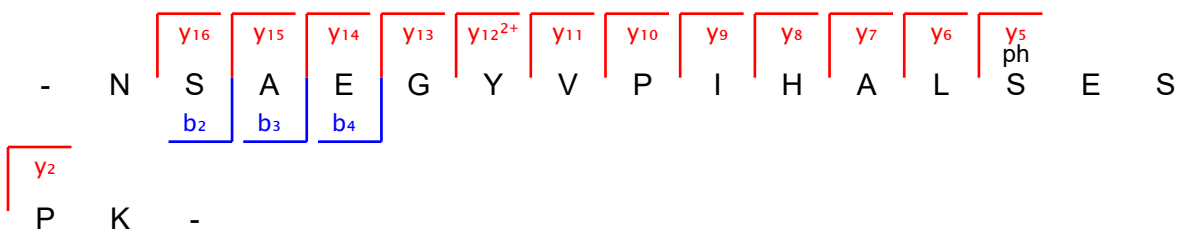



Raw file Scan Method Score m/z  
 sys\_15\_1 22916 FTMS; HCD 71.65 735.98

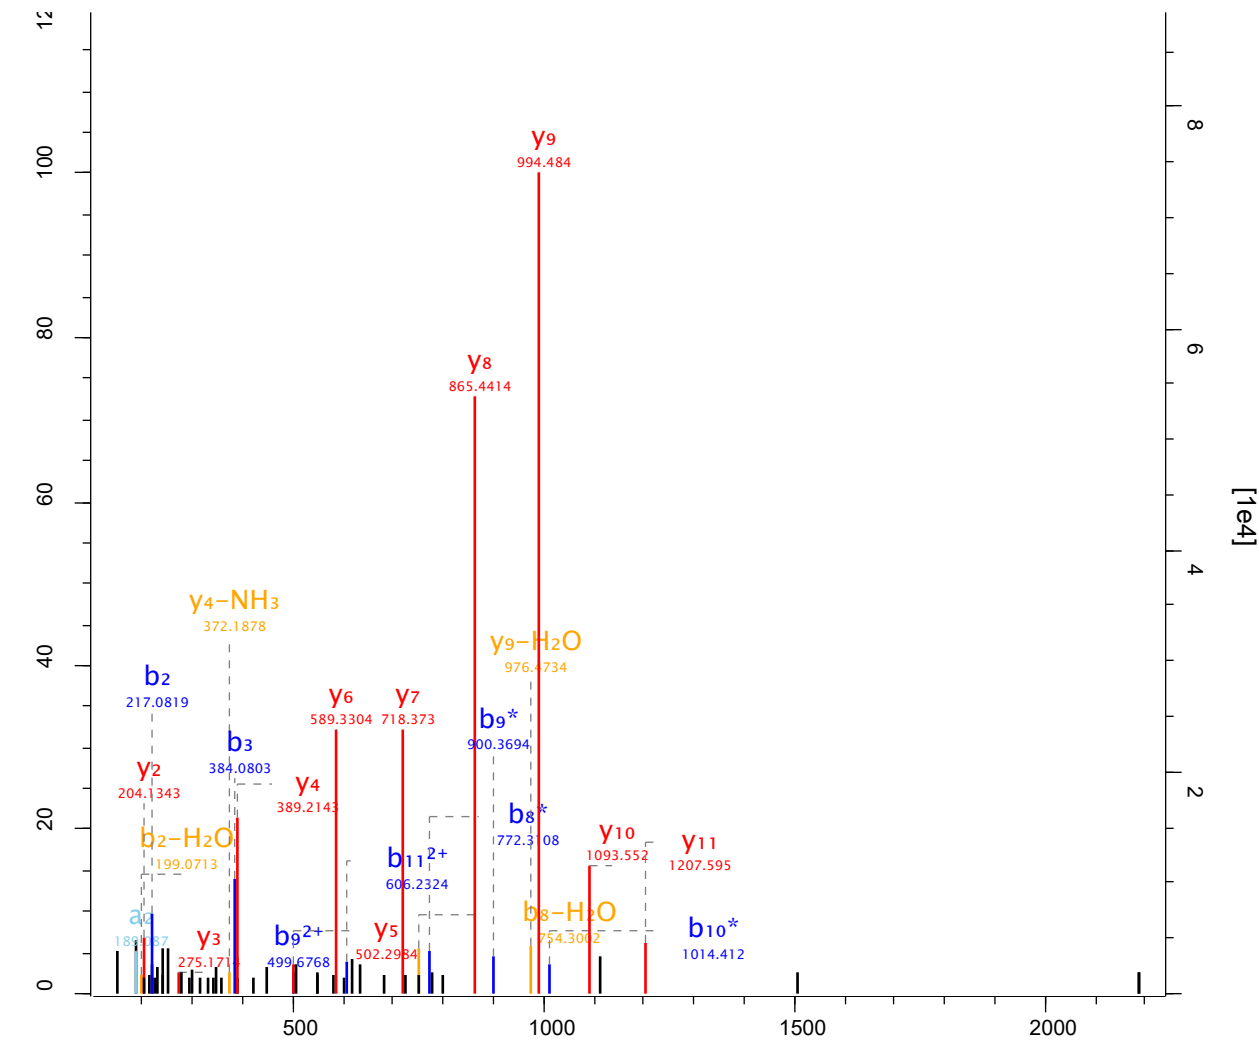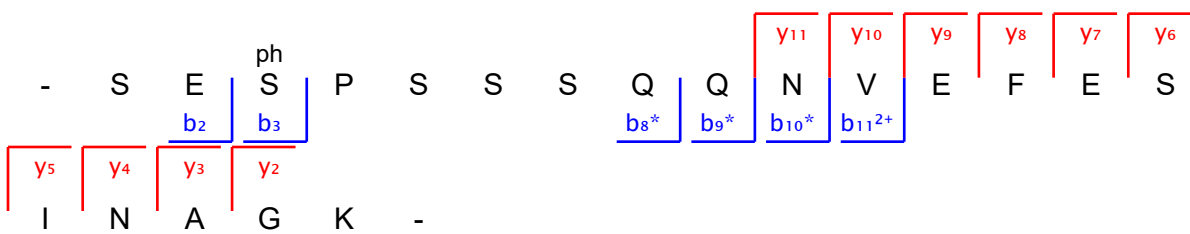

Raw file Scan Method Score m/z  
 sys\_15\_1 22976 FTMS; HCD 68.41 618.63

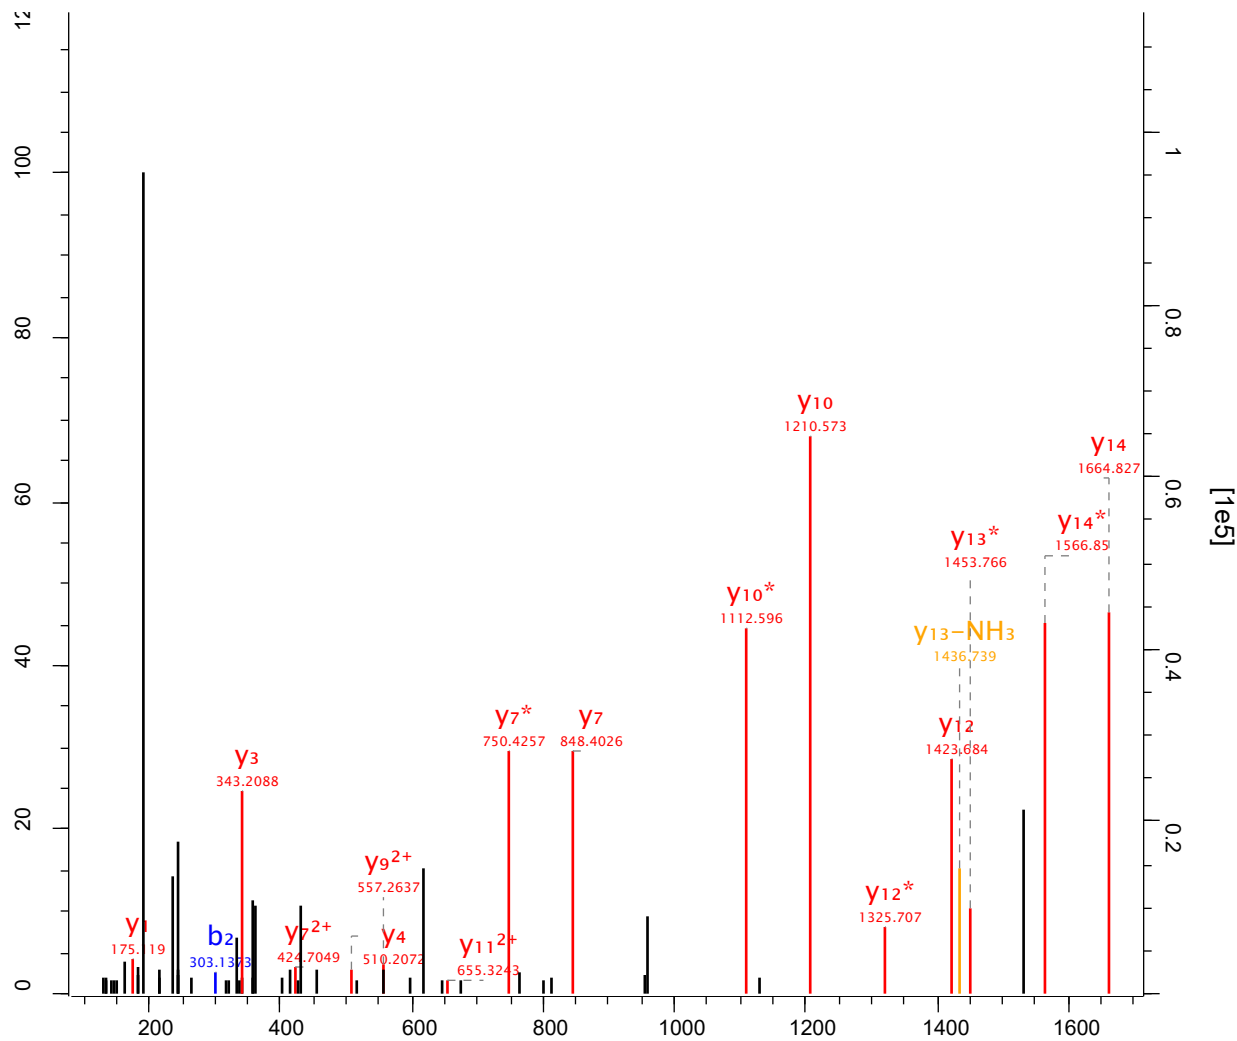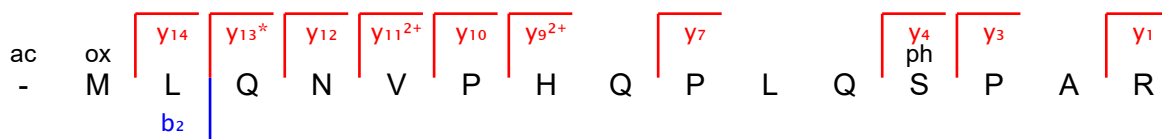

Raw file Scan Method Score m/z  
 sys\_15\_1 23027 FTMS; HCD 145.46 509.73

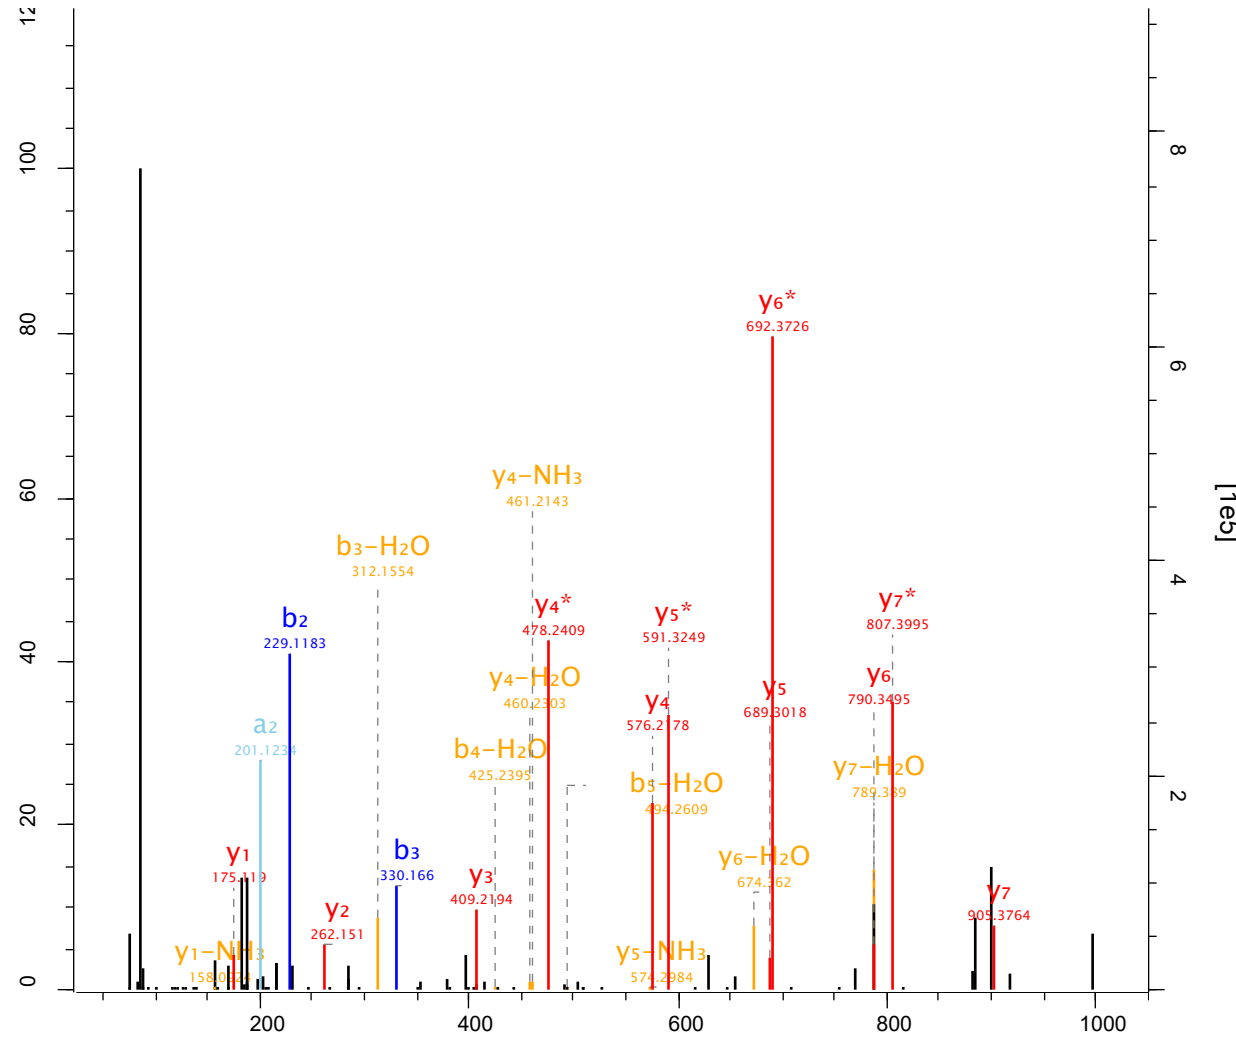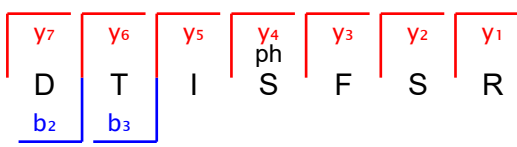

Raw file Scan Method Score m/z  
 sys\_15\_1 23150 FTMS; HCD 224.86 827.89

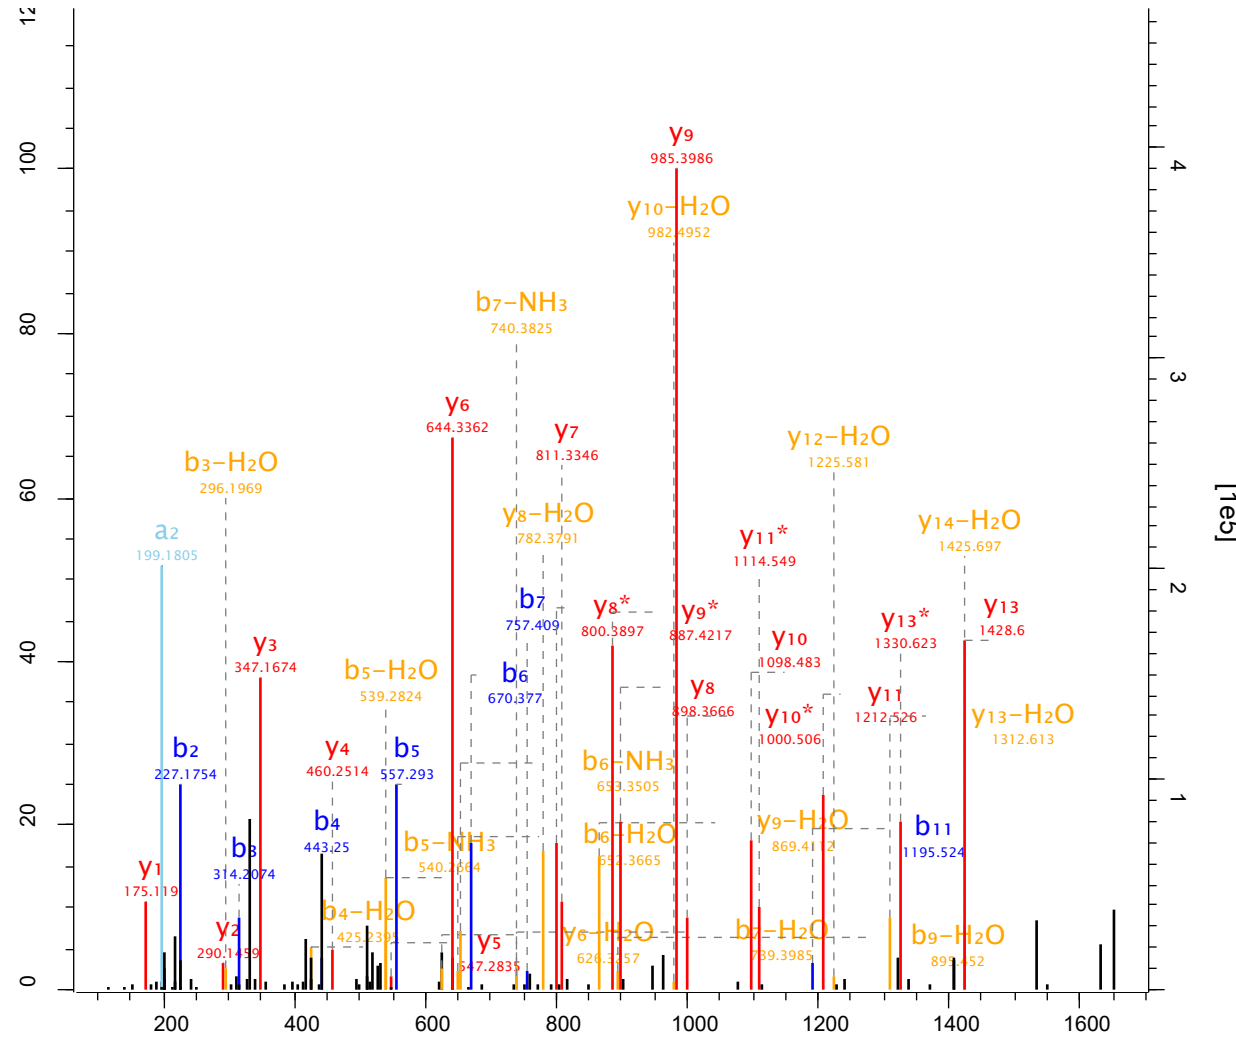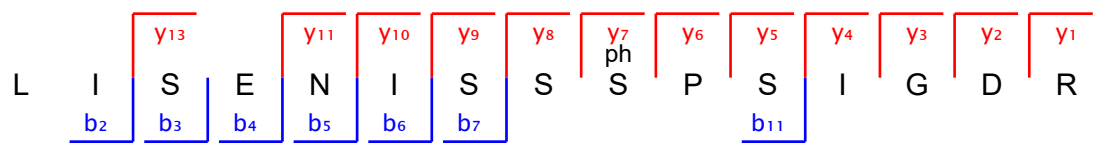

Raw file Scan Method Score m/z  
 sys\_15\_1 2320 FTMS; HCD 85.55 555.7

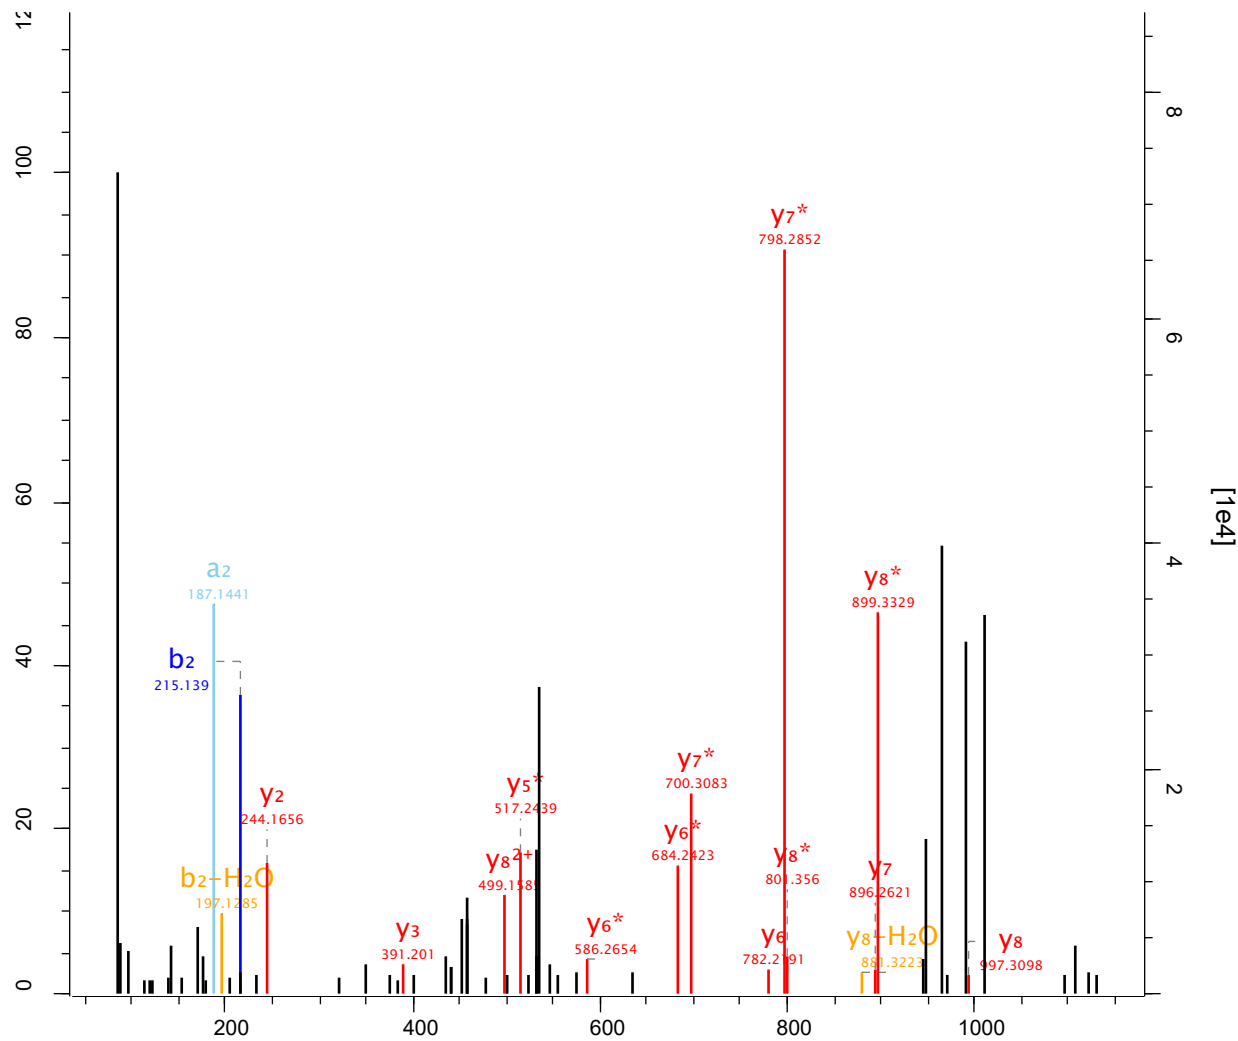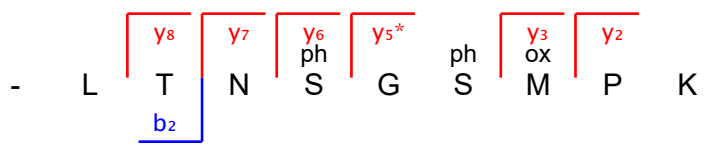

Raw file Scan Method Score m/z  
 sys\_15\_1 23221 FTMS; HCD 127.3 768.32

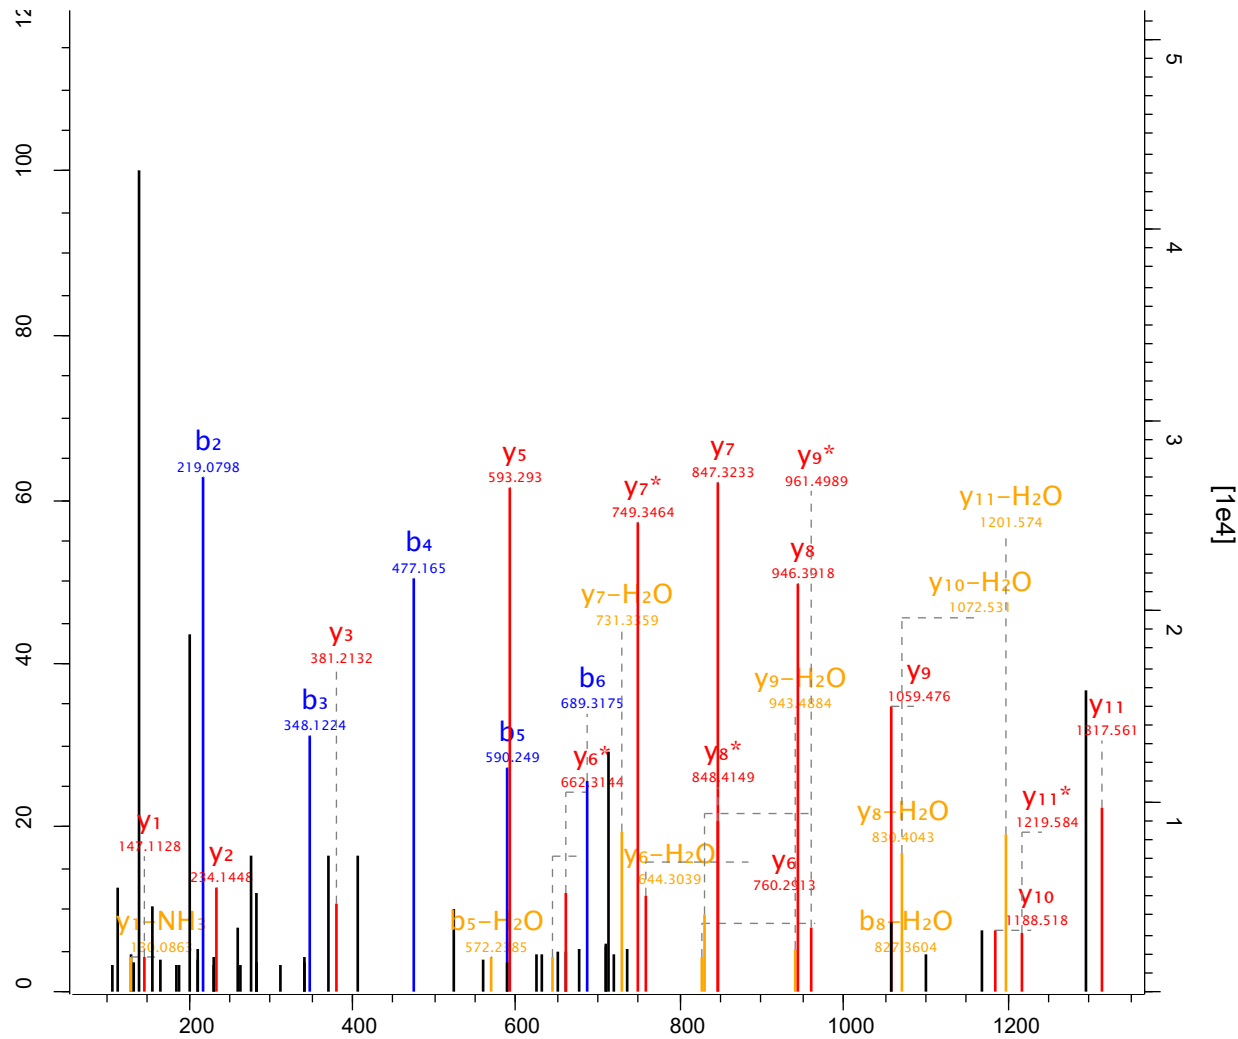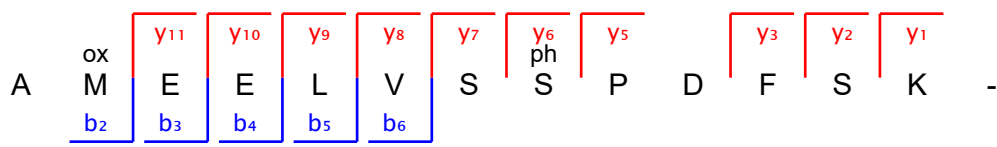

Raw file Scan Method Score m/z  
 sys\_15\_1 23270 FTMS; HCD 52.86 999.93

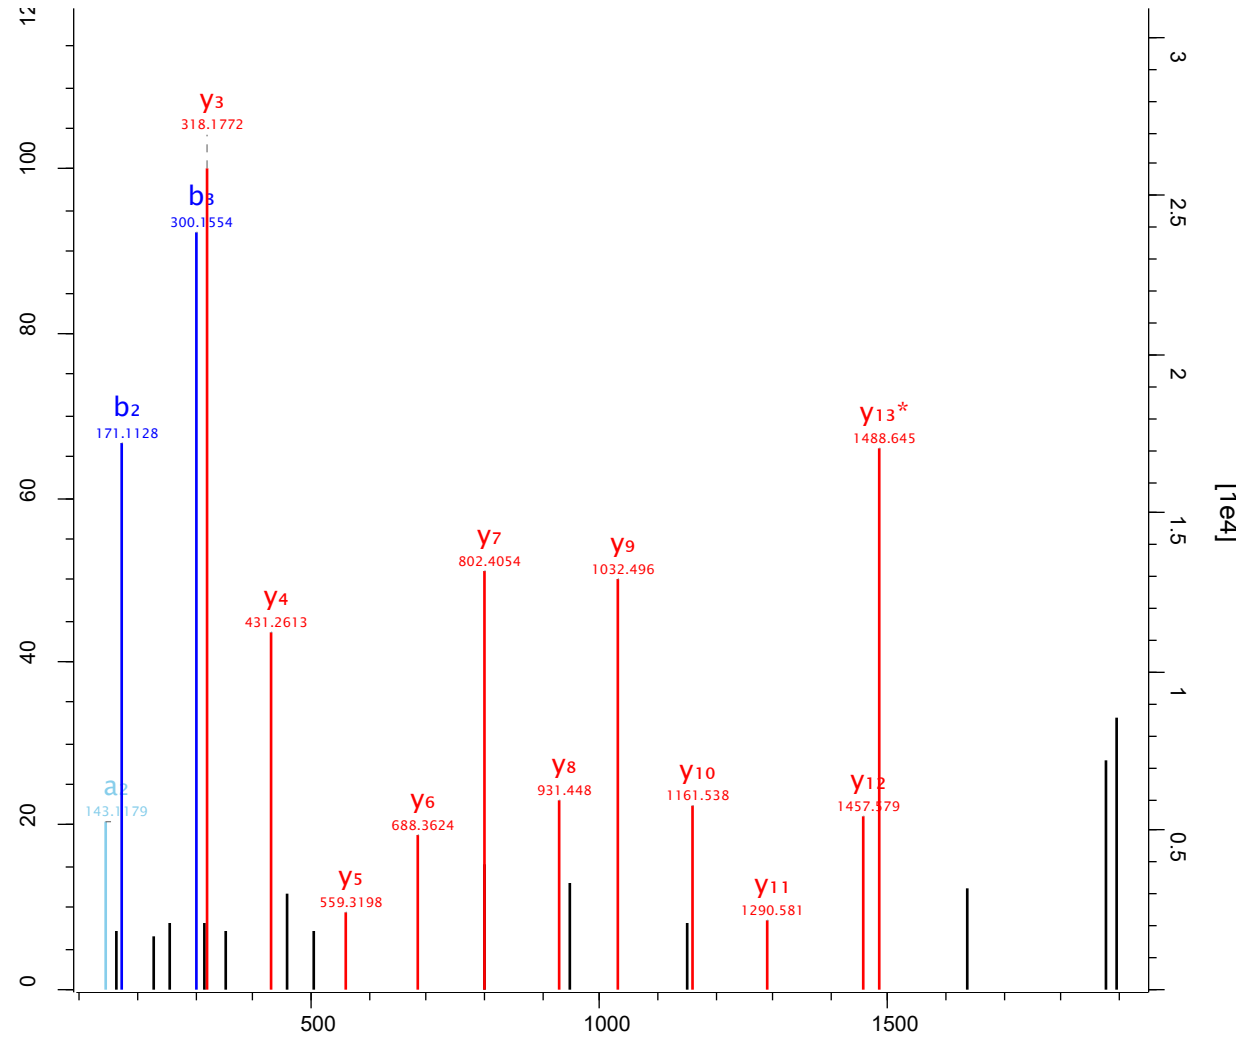

- G L E I E S E E T E N E Q I G  
 N K -

Fragmentation mapping:  
 - b<sub>2</sub> (L) and b<sub>3</sub> (LE) are indicated by blue brackets.  
 - y<sub>13</sub>\* (E), y<sub>12</sub>ph (S), y<sub>11</sub> (E), y<sub>10</sub> (E), y<sub>9</sub> (T), y<sub>8</sub> (E), y<sub>7</sub> (N), y<sub>6</sub> (E), y<sub>5</sub> (Q), y<sub>4</sub> (I), and y<sub>3</sub> (G) are indicated by red brackets above the sequence.

Raw file Scan Method Score m/z  
 sys\_15\_1 23342 FTMS; HCD 263.1 955.41

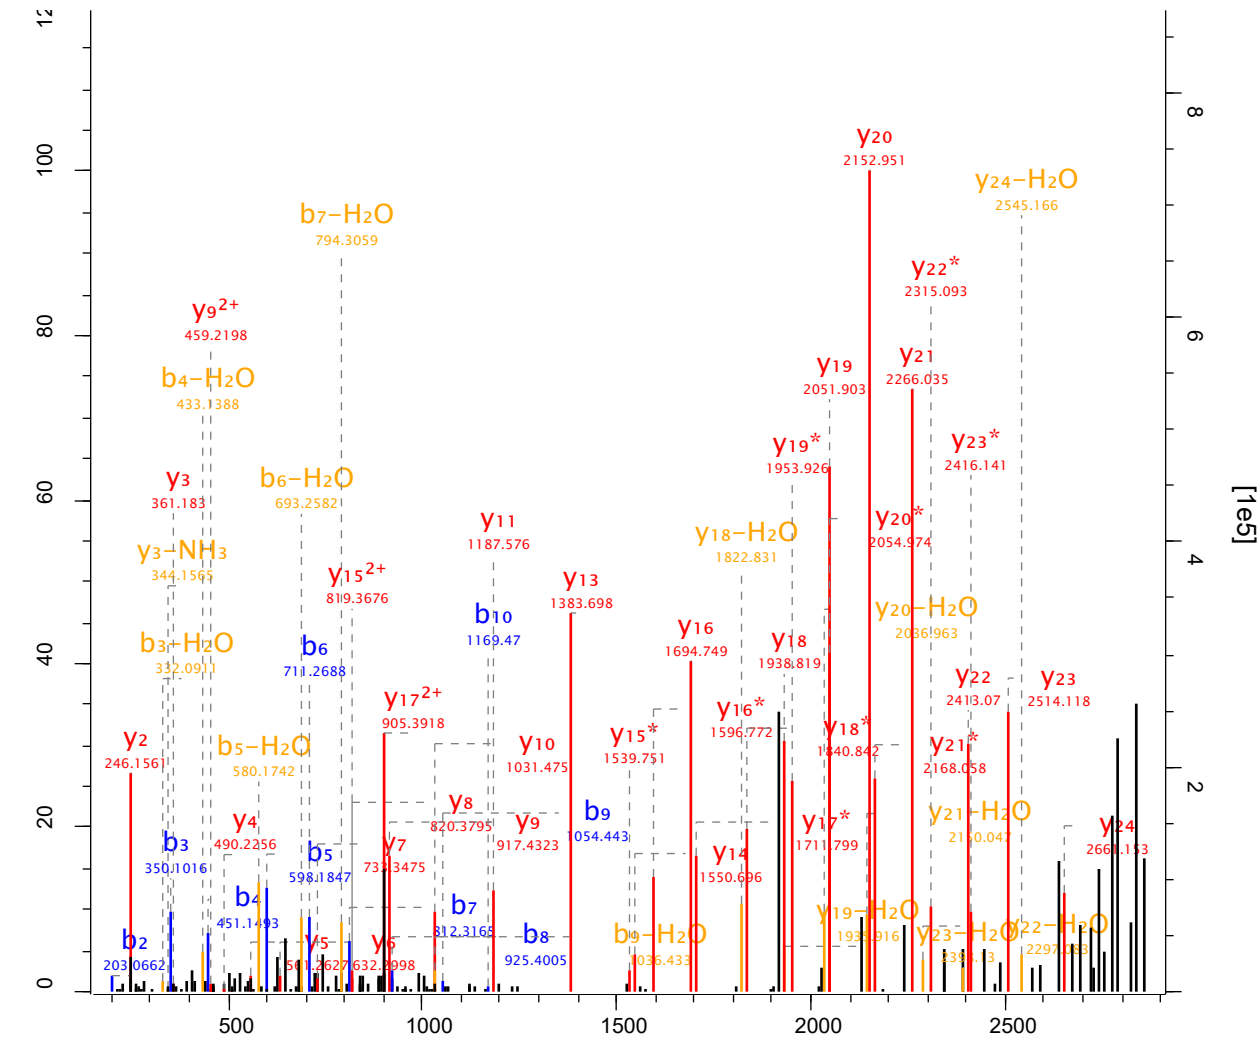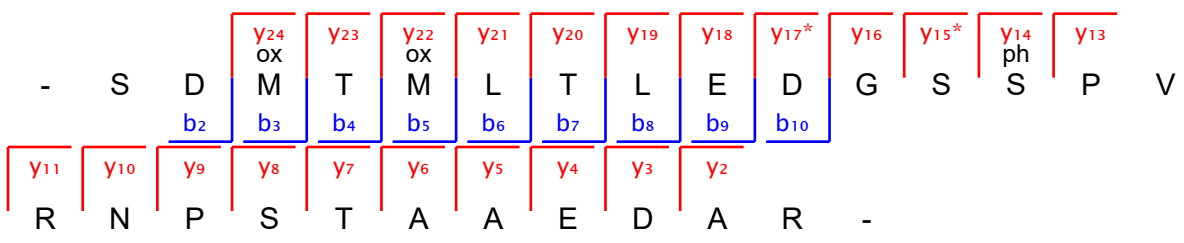



Raw file Scan Method Score m/z  
 sys\_15\_1 23369 FTMS; HCD 100.22 576.31

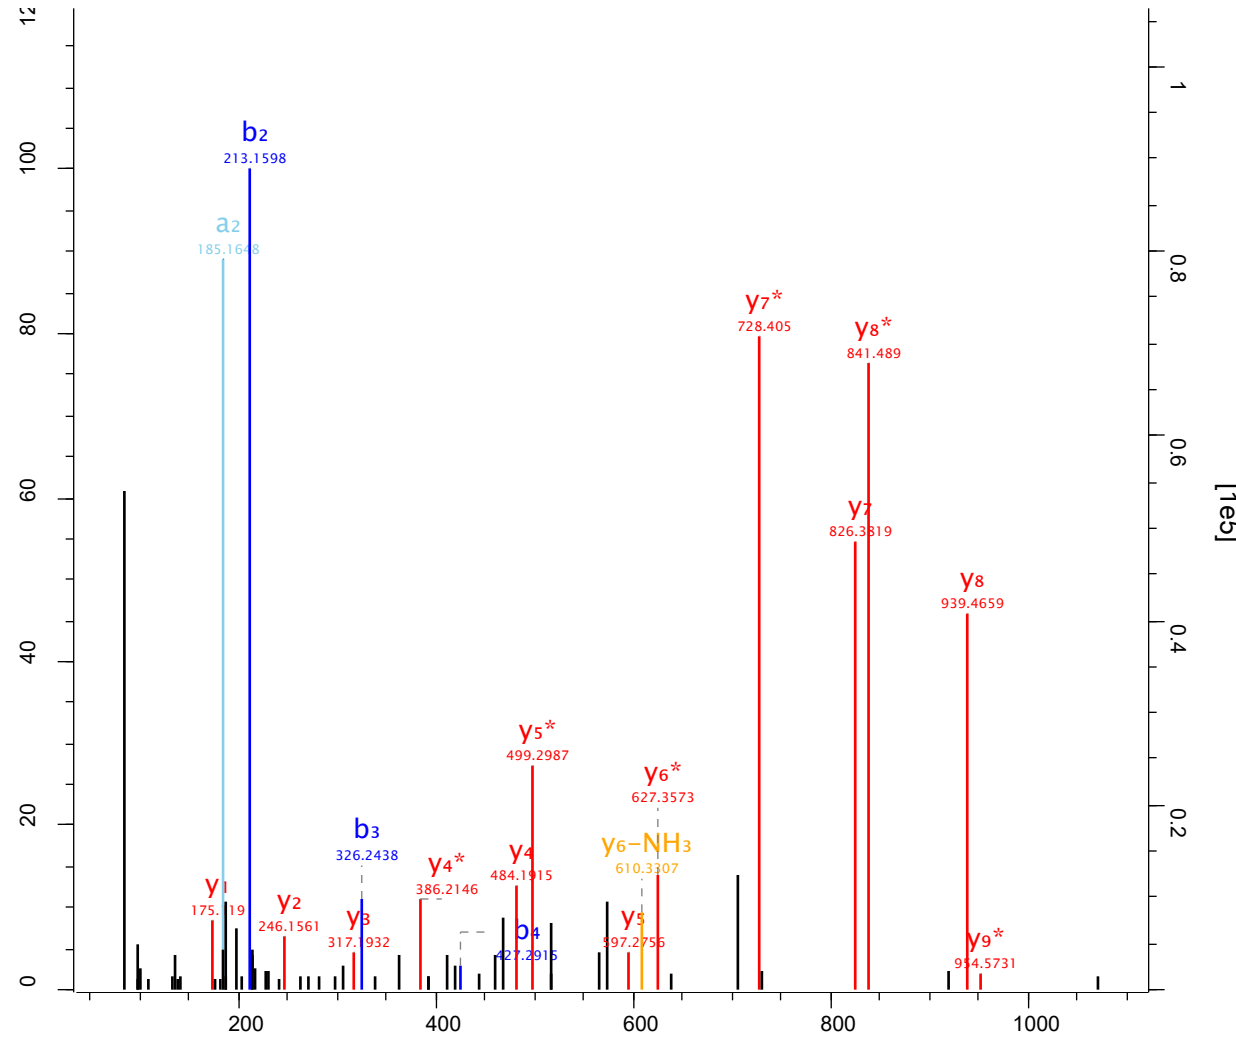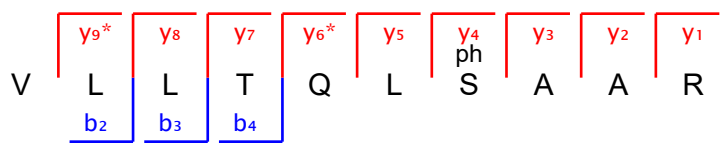

Raw file Scan Method Score m/z  
 sys\_15\_1 23406 FTMS; HCD 51.57 632.63

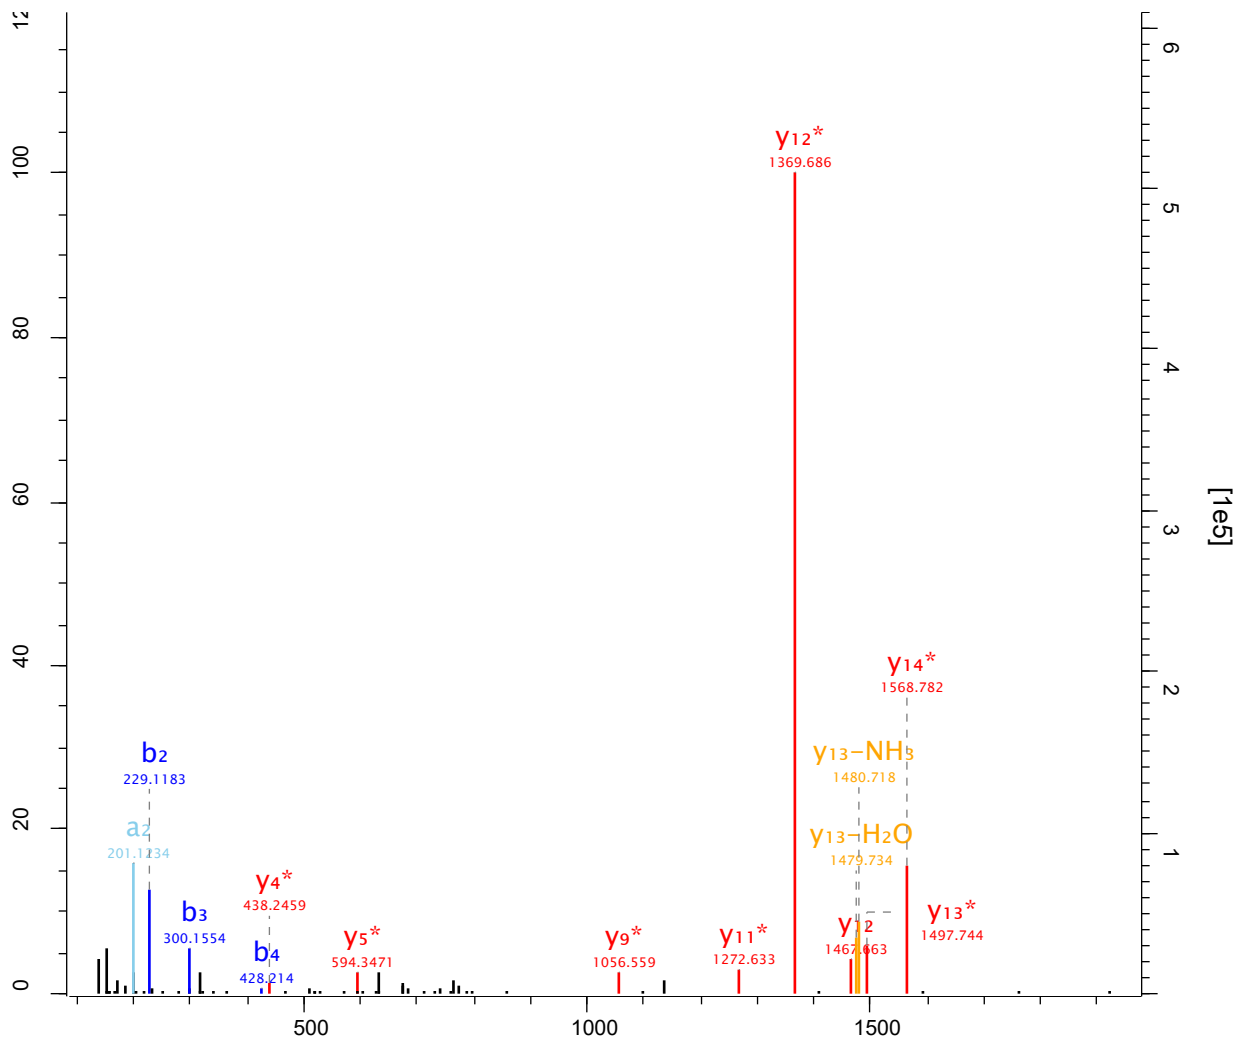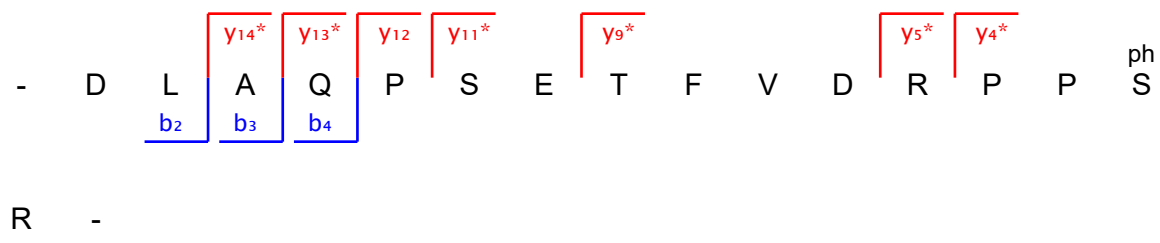

Raw file Scan Method Score m/z  
 sys\_15\_1 23436 FTMS; HCD 43.9 524.25

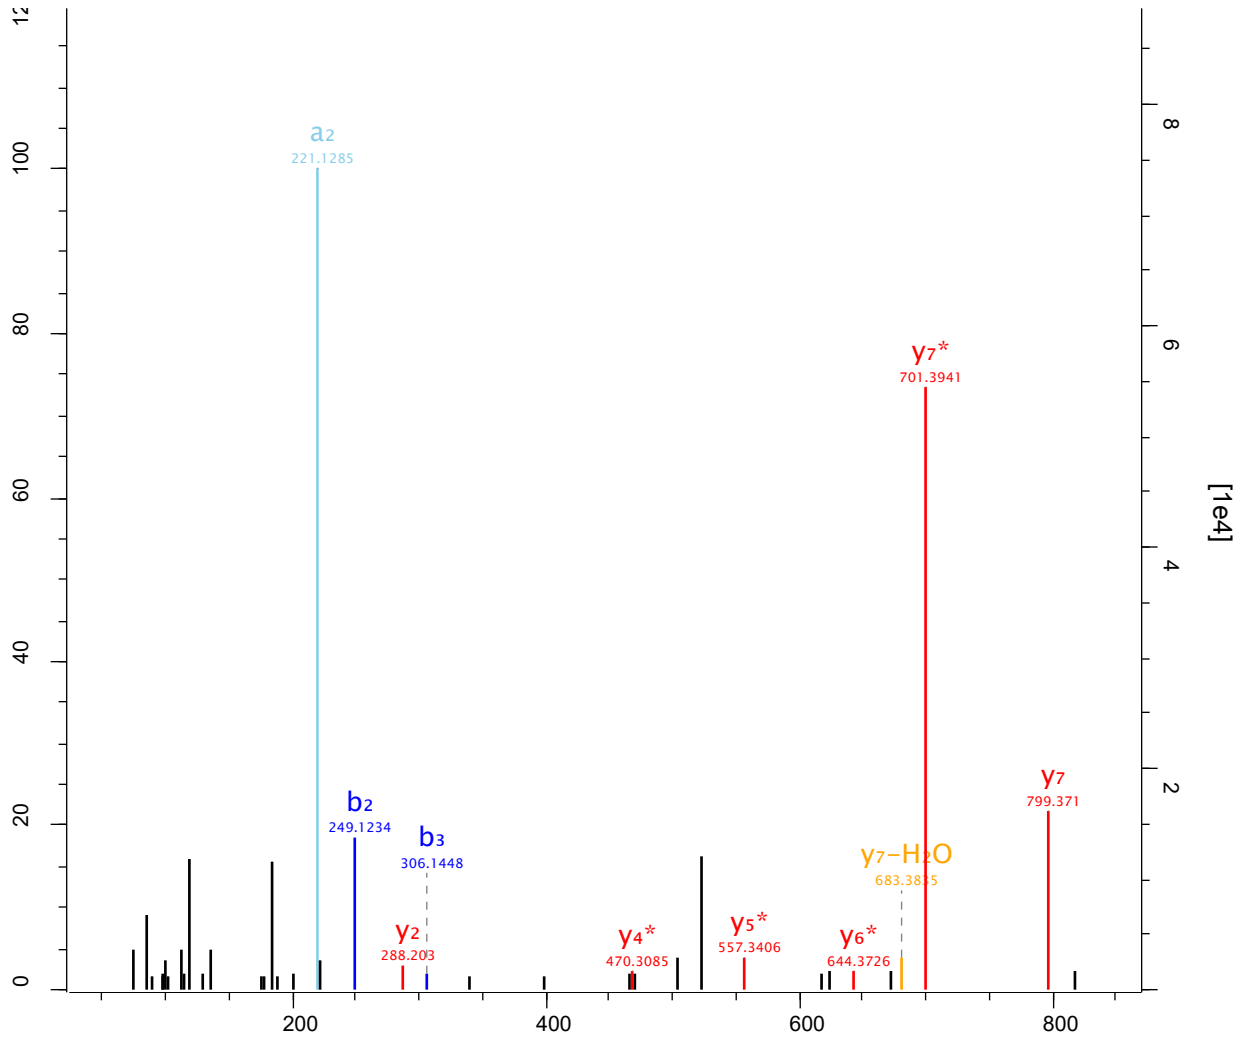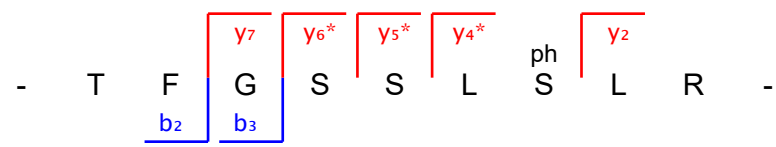

Raw file Scan Method Score m/z  
 sys\_15\_1 23453 FTMS; HCD 139.3 559.27

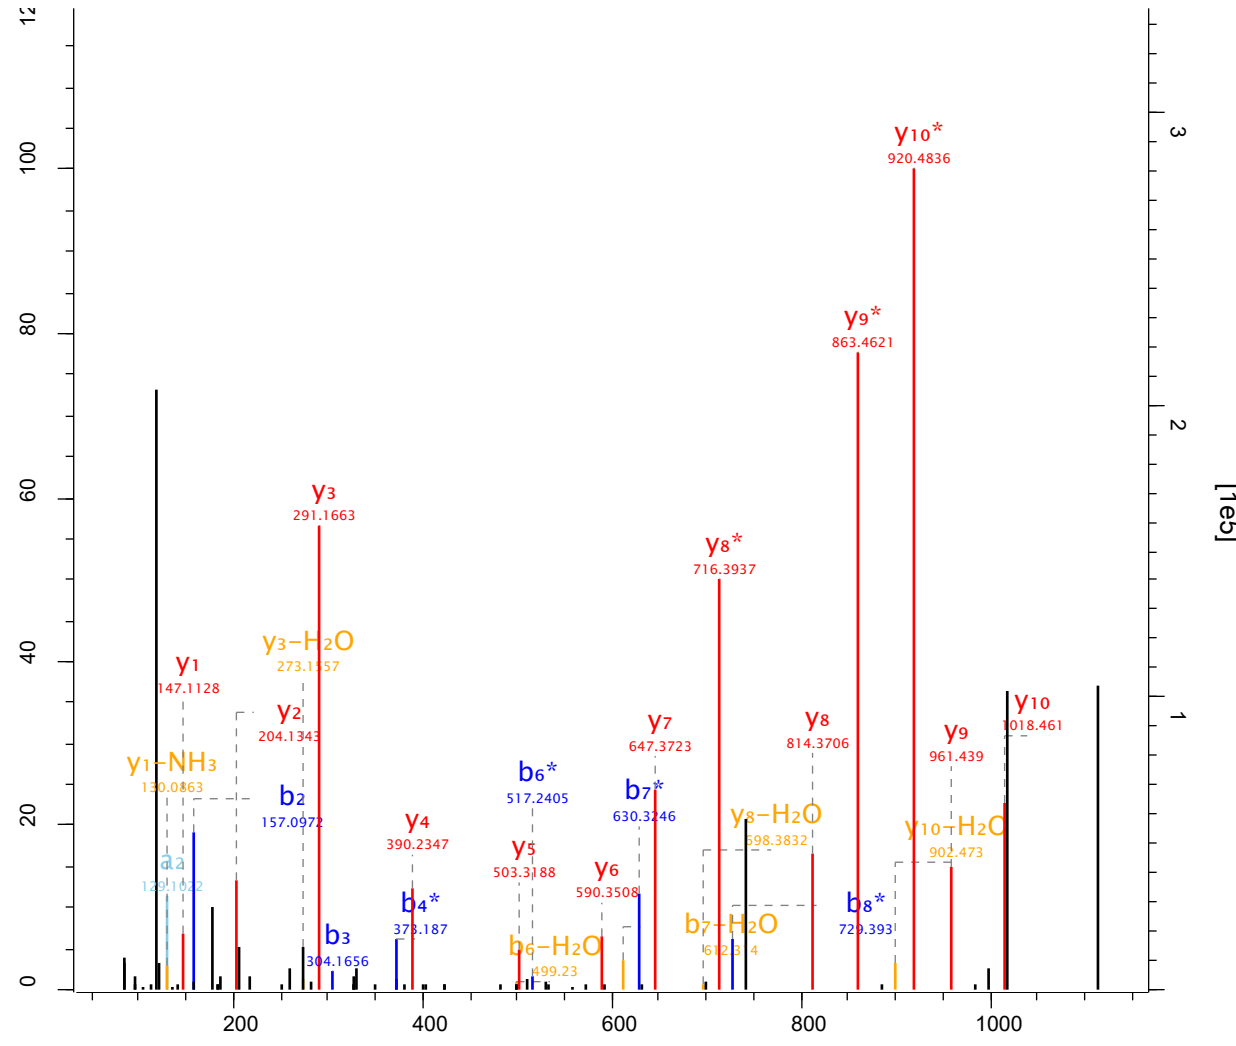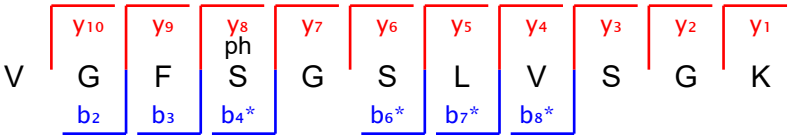

Raw file Scan Method Score m/z  
 sys\_15\_1 23465 FTMS; HCD 77.44 748.04

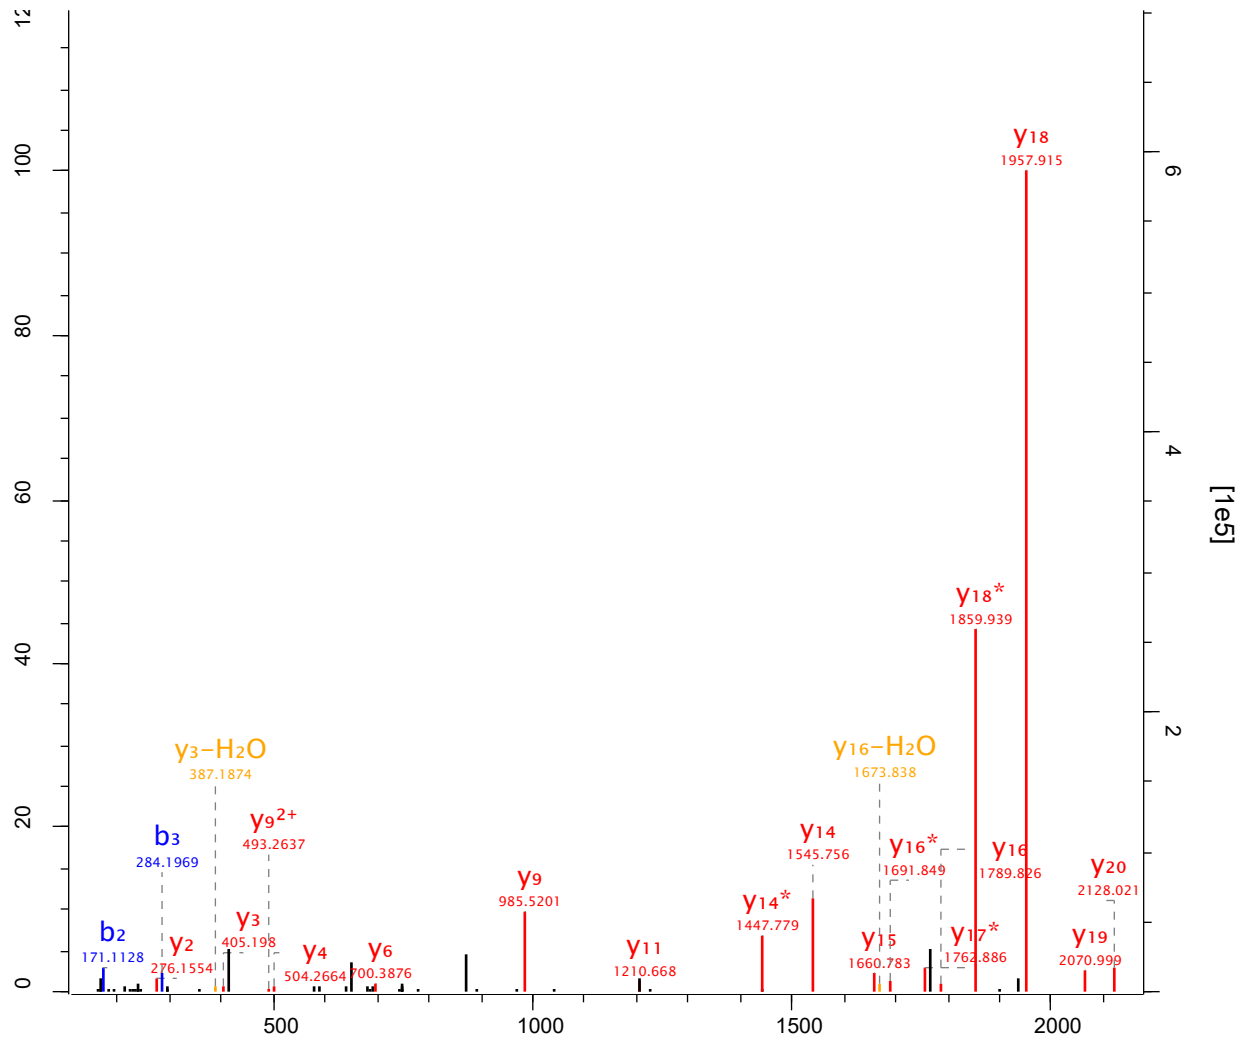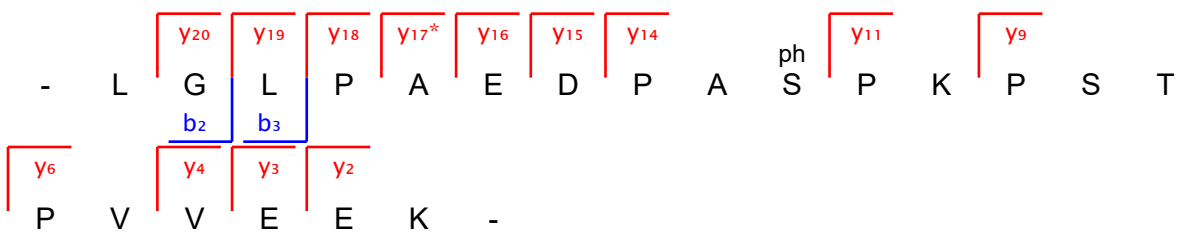

Raw file Scan Method Score m/z  
 sys\_15\_1 23501 FTMS; HCD 100.22 581.76

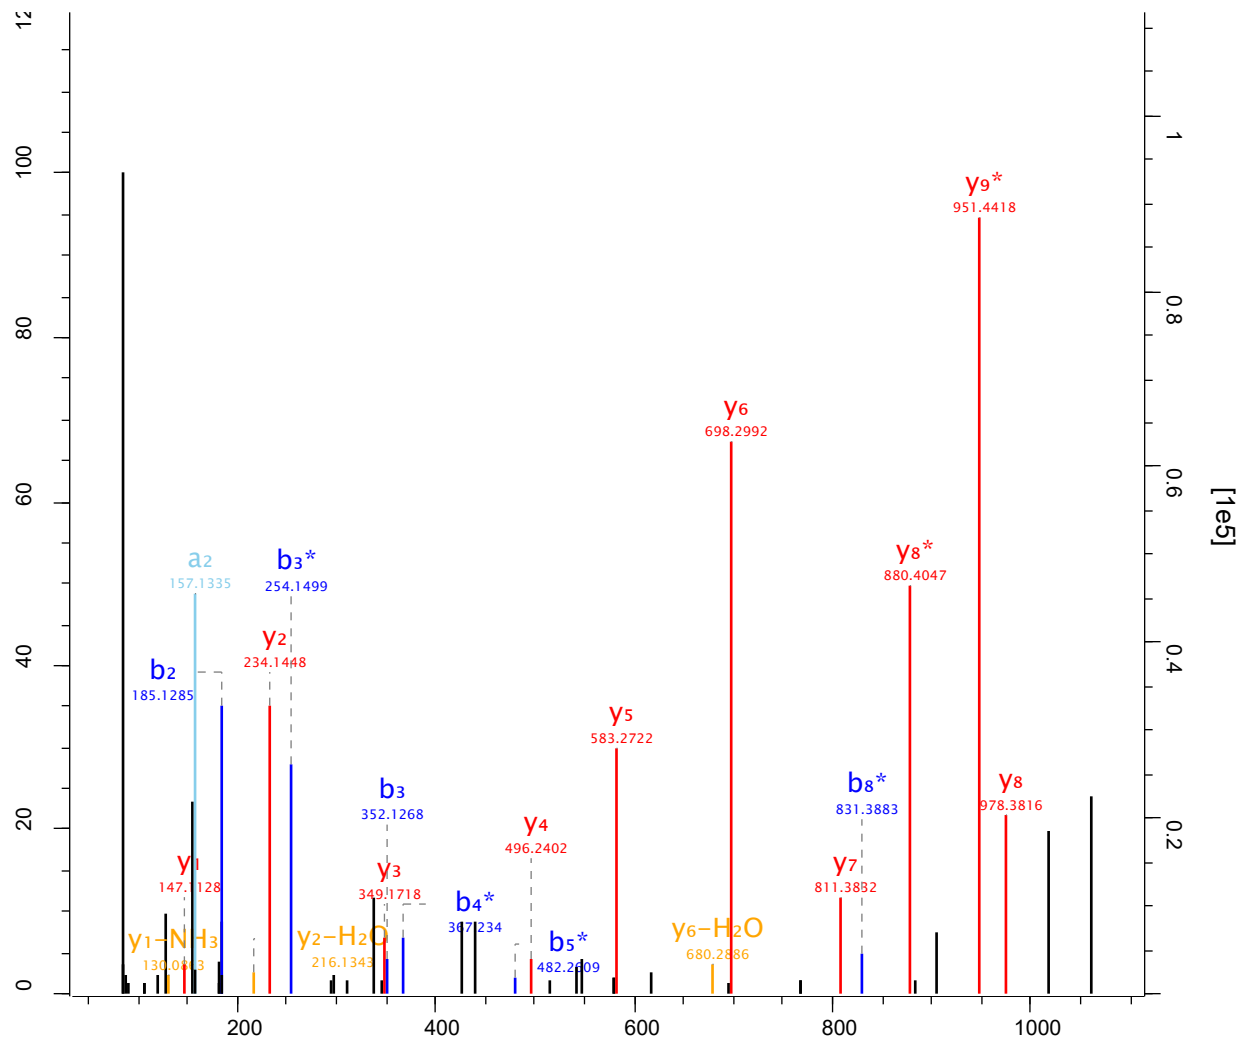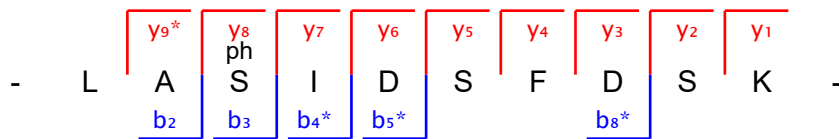

Raw file Scan Method Score m/z  
 sys\_15\_1 23512 FTMS; HCD 134.57 532.73

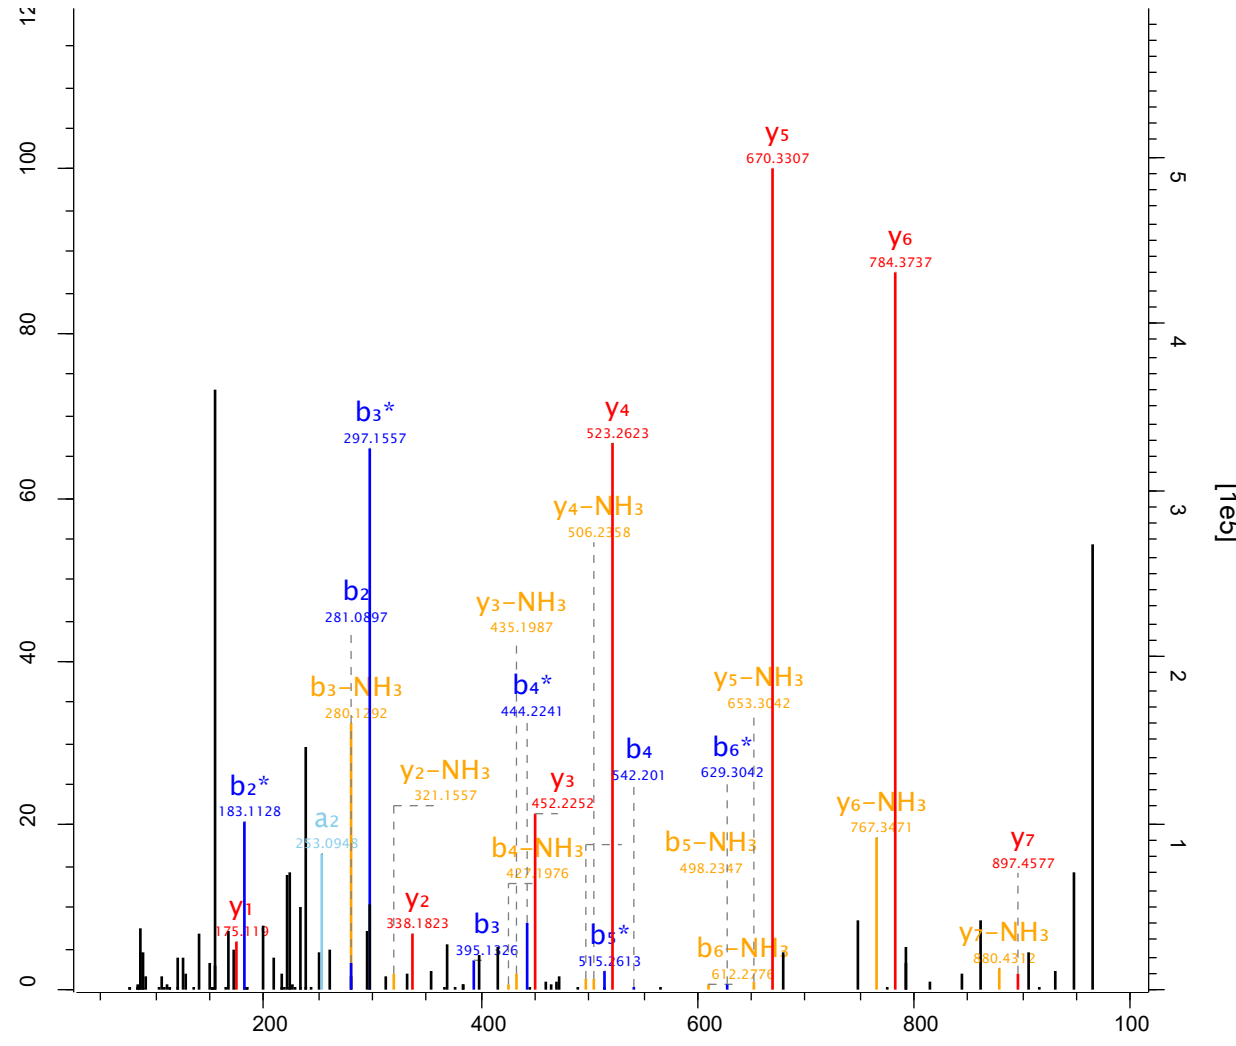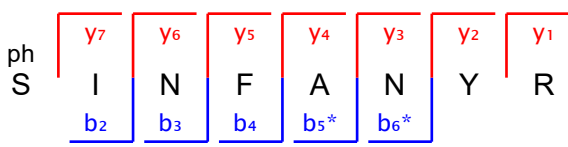

Raw file Scan Method Score m/z  
 sys\_15\_1 23579 FTMS; HCD 100.23 707.79

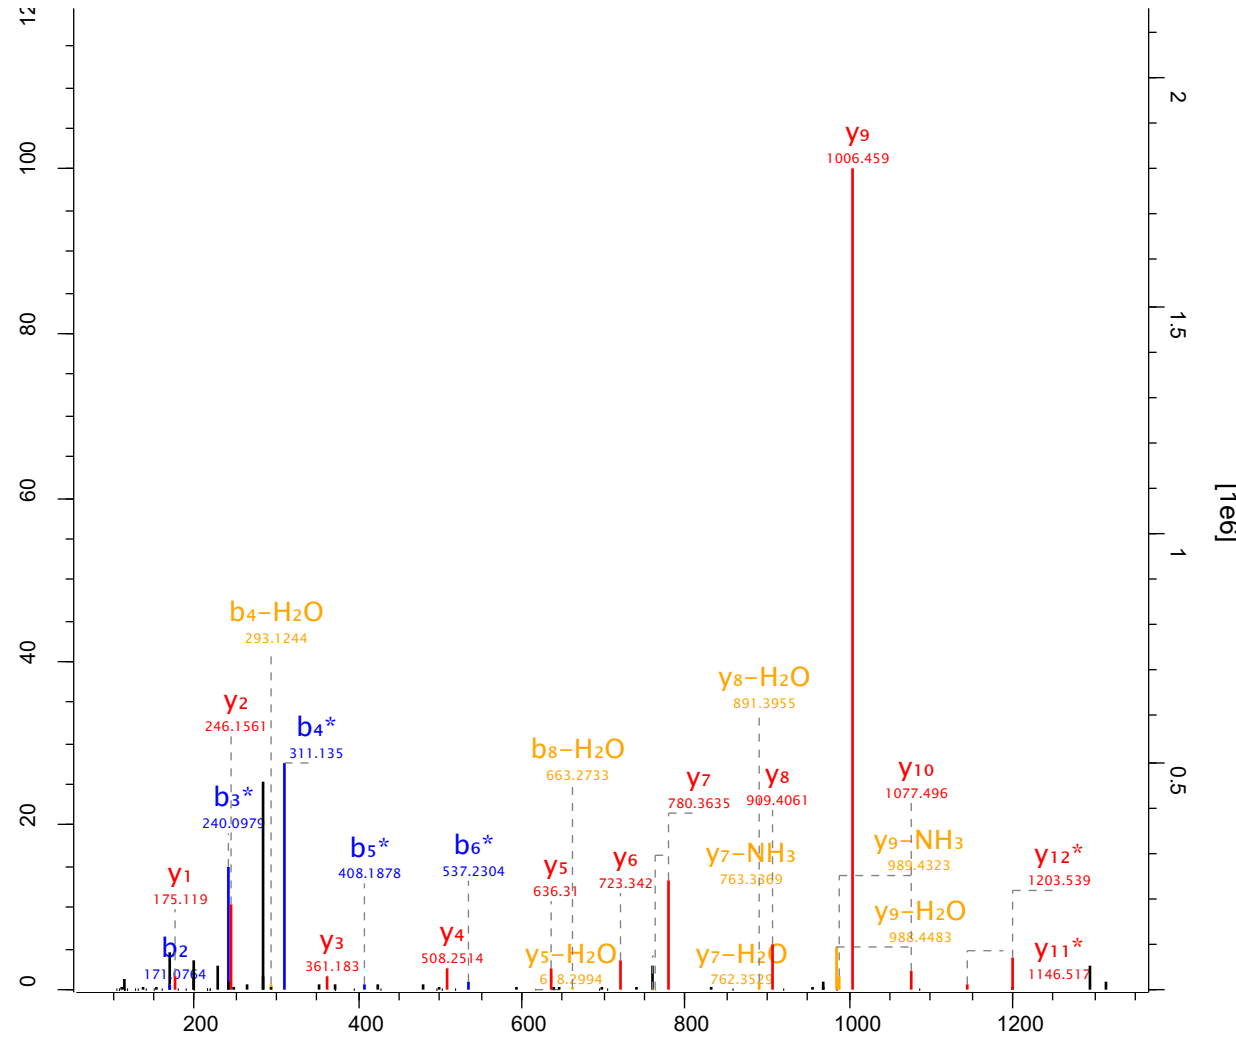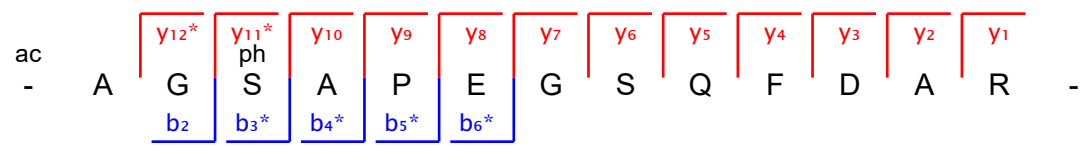



Raw file Scan Method Score m/z  
 sys\_15\_1 23587 FTMS; HCD 106.93 496.21

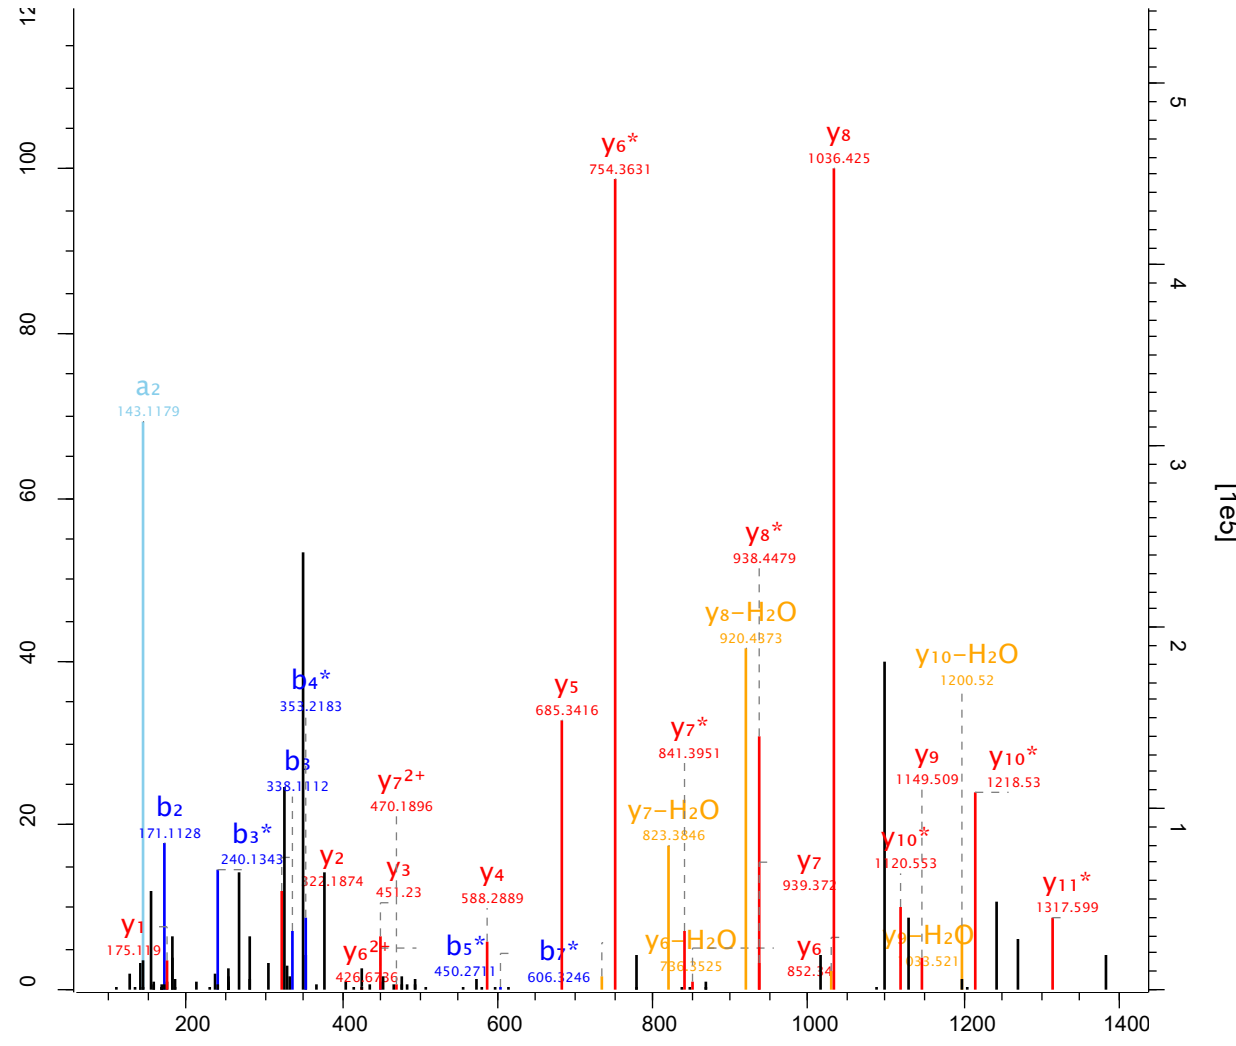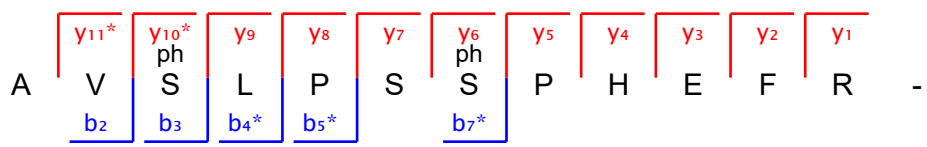

Raw file Scan Method Score m/z  
 sys\_15\_1 23727 FTMS; HCD 209.43 784.84

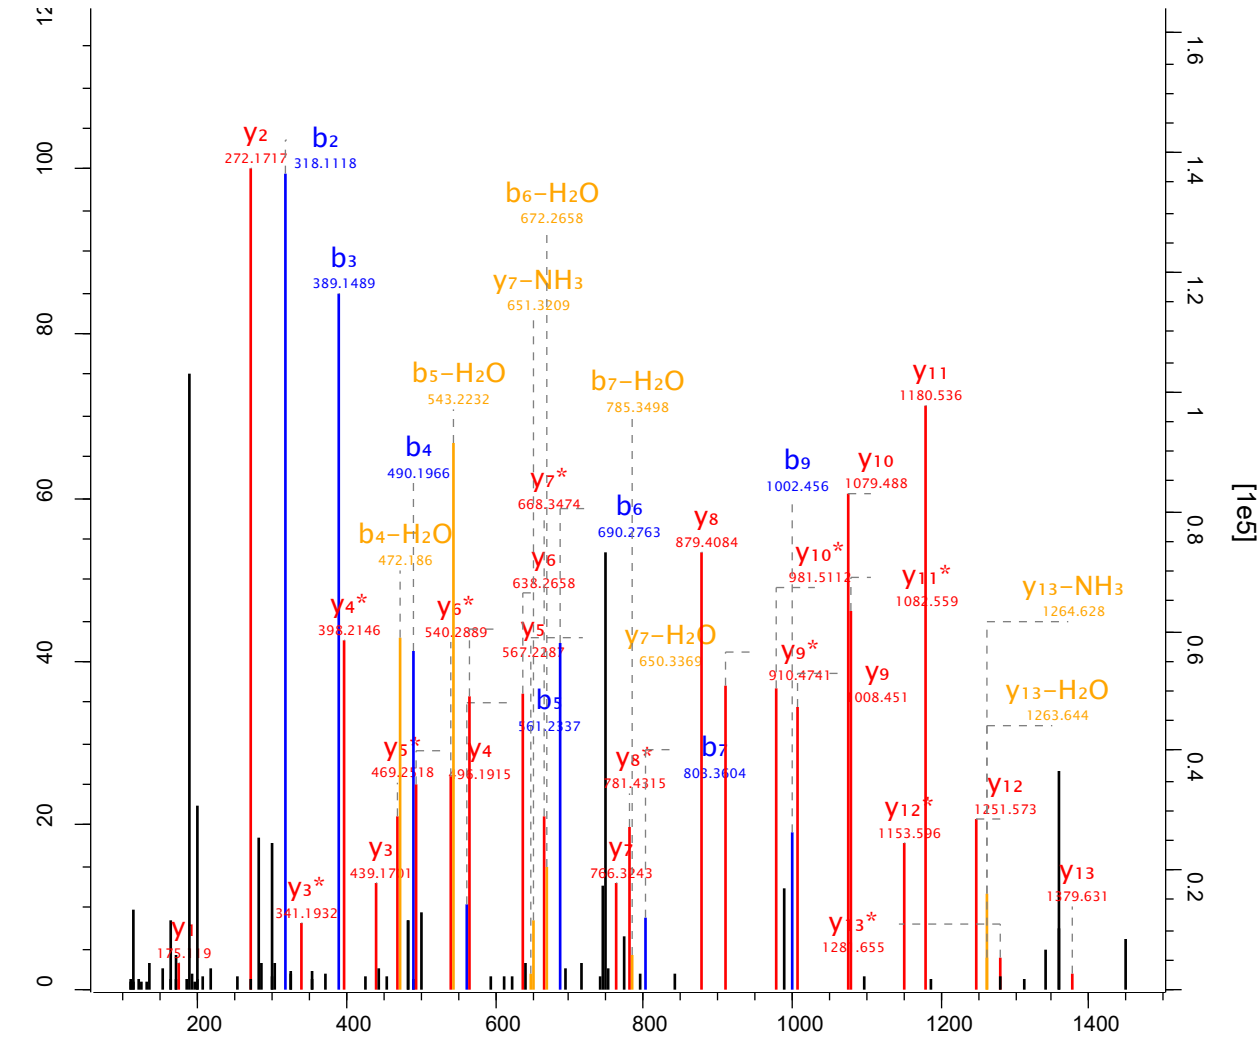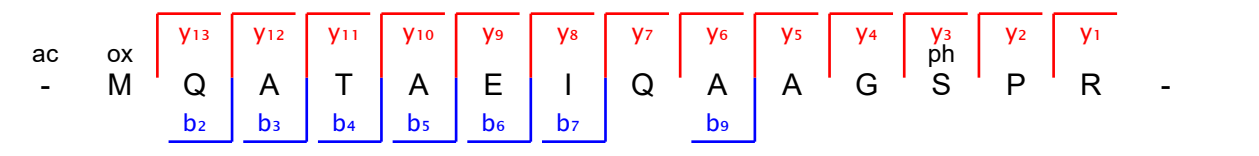

Raw file Scan Method Score m/z  
 sys\_15\_1 23736 FTMS; HCD 166.29 925.88

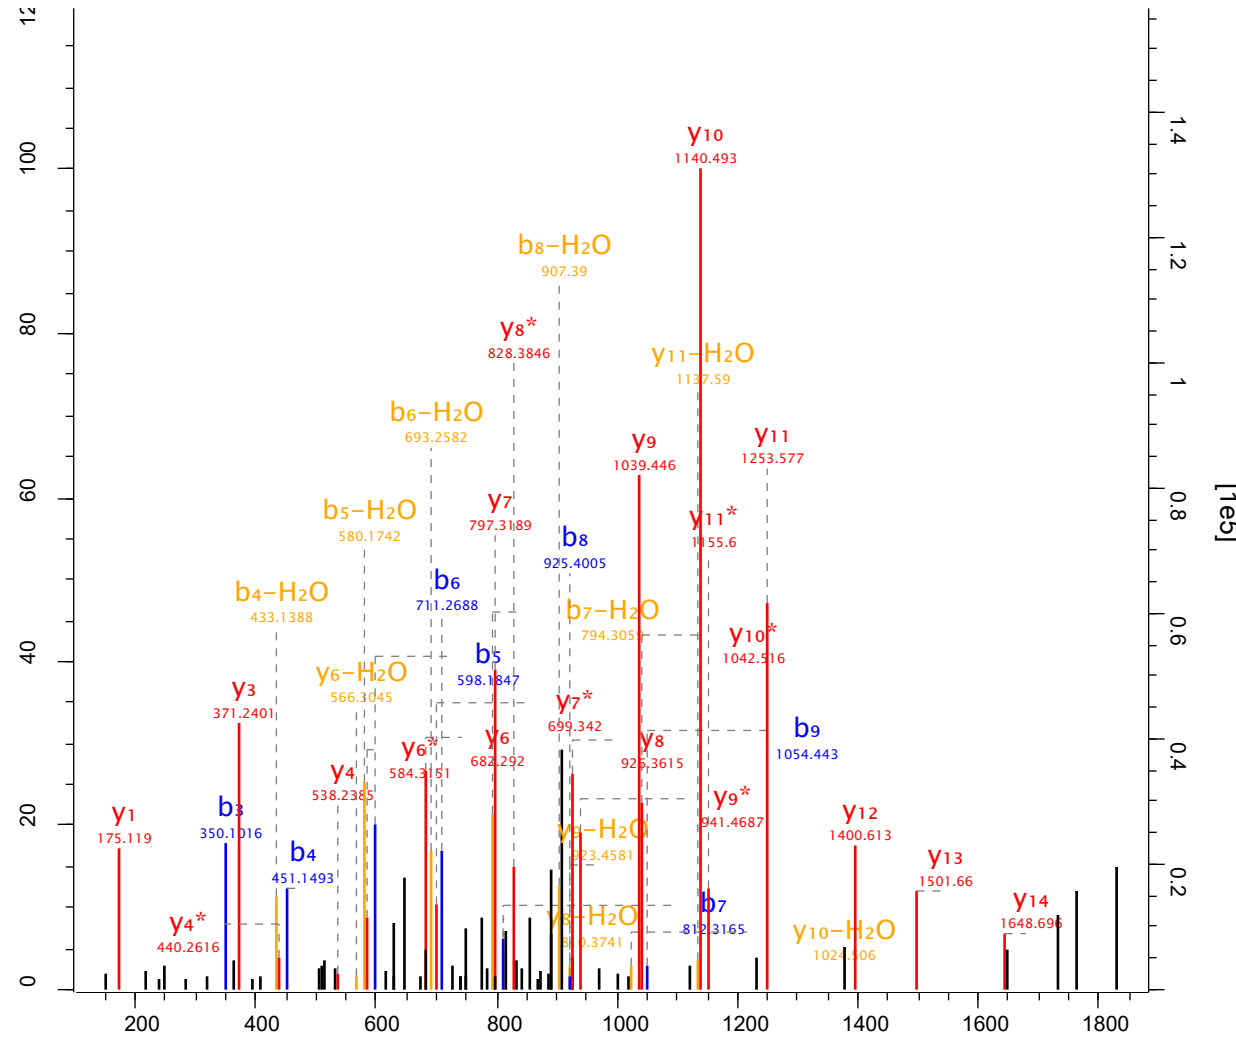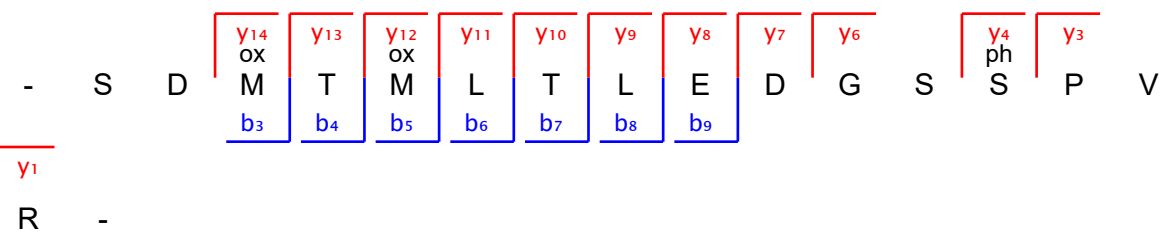

Raw file Scan Method Score m/z  
 sys\_15\_1 23777 FTMS; HCD 41.09 756.33

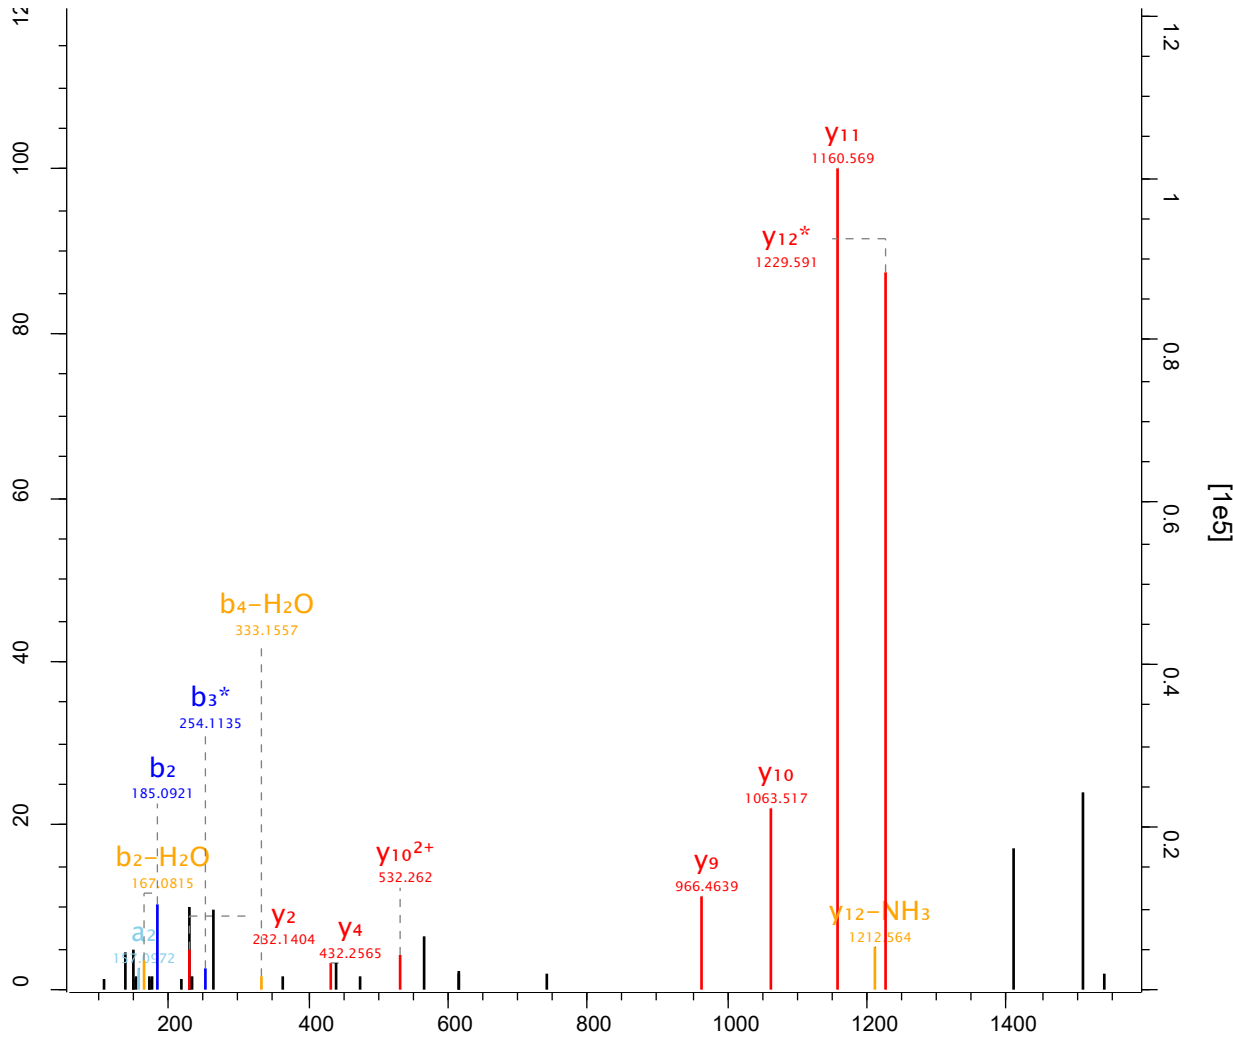

- S P y12\*  
ph  
S y11 y10 y9 G N E F y4 S I y2 G R -

b2 b3\*

Raw file Scan Method Score m/z  
 sys\_15\_1 23780 FTMS; HCD 58.04 585.79

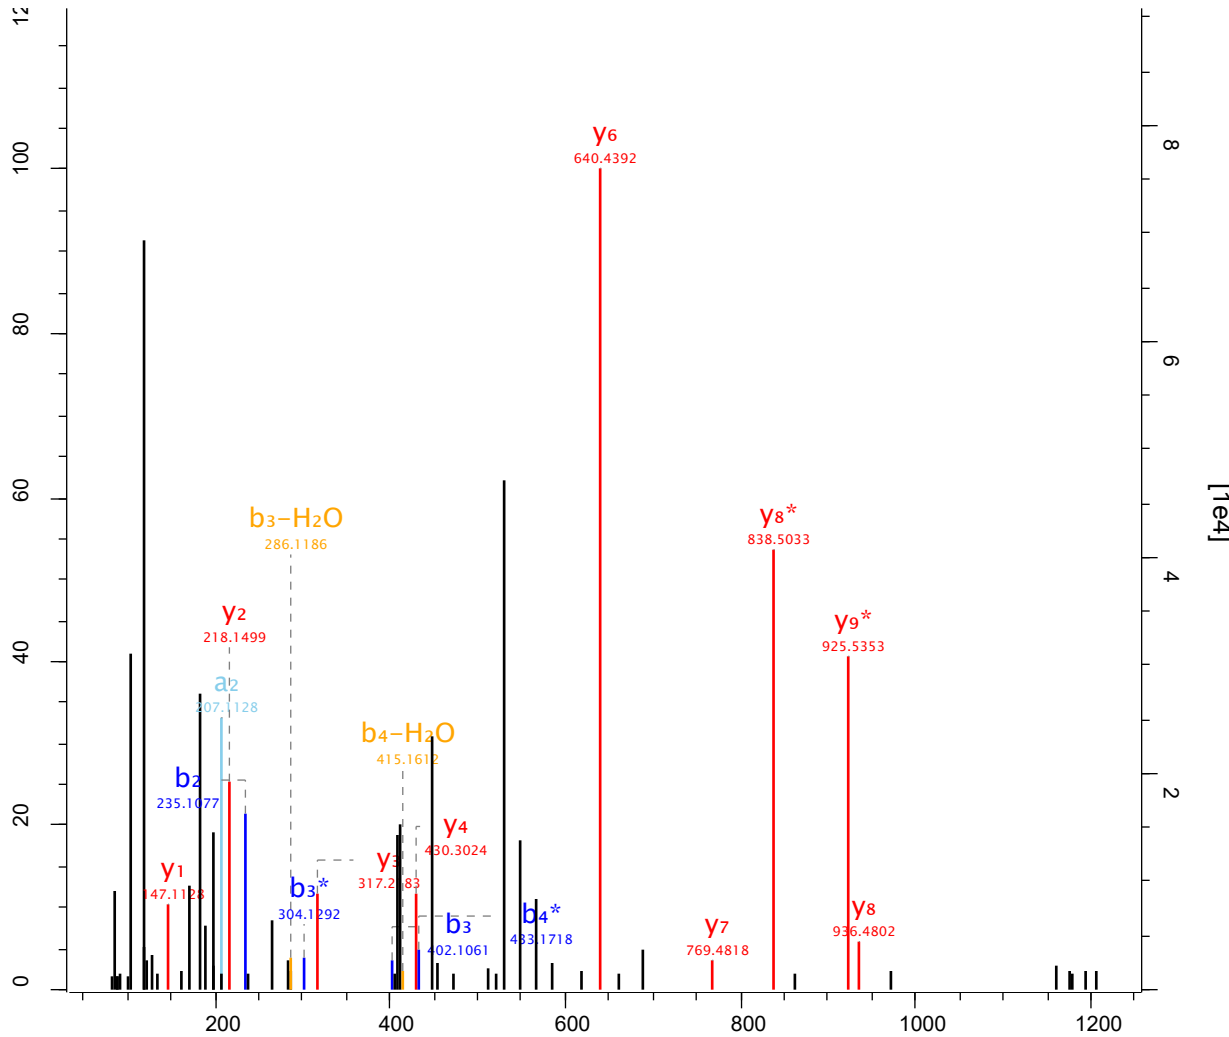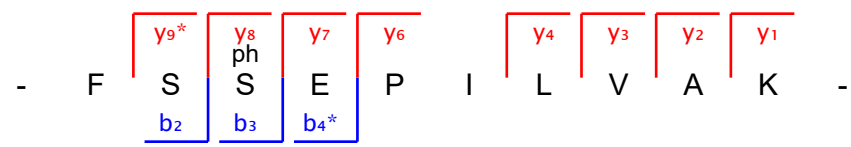

| Raw file | Scan  | Method    | Score | m/z    |
|----------|-------|-----------|-------|--------|
| sys_15_1 | 23894 | FTMS; HCD | 53.45 | 607.79 |

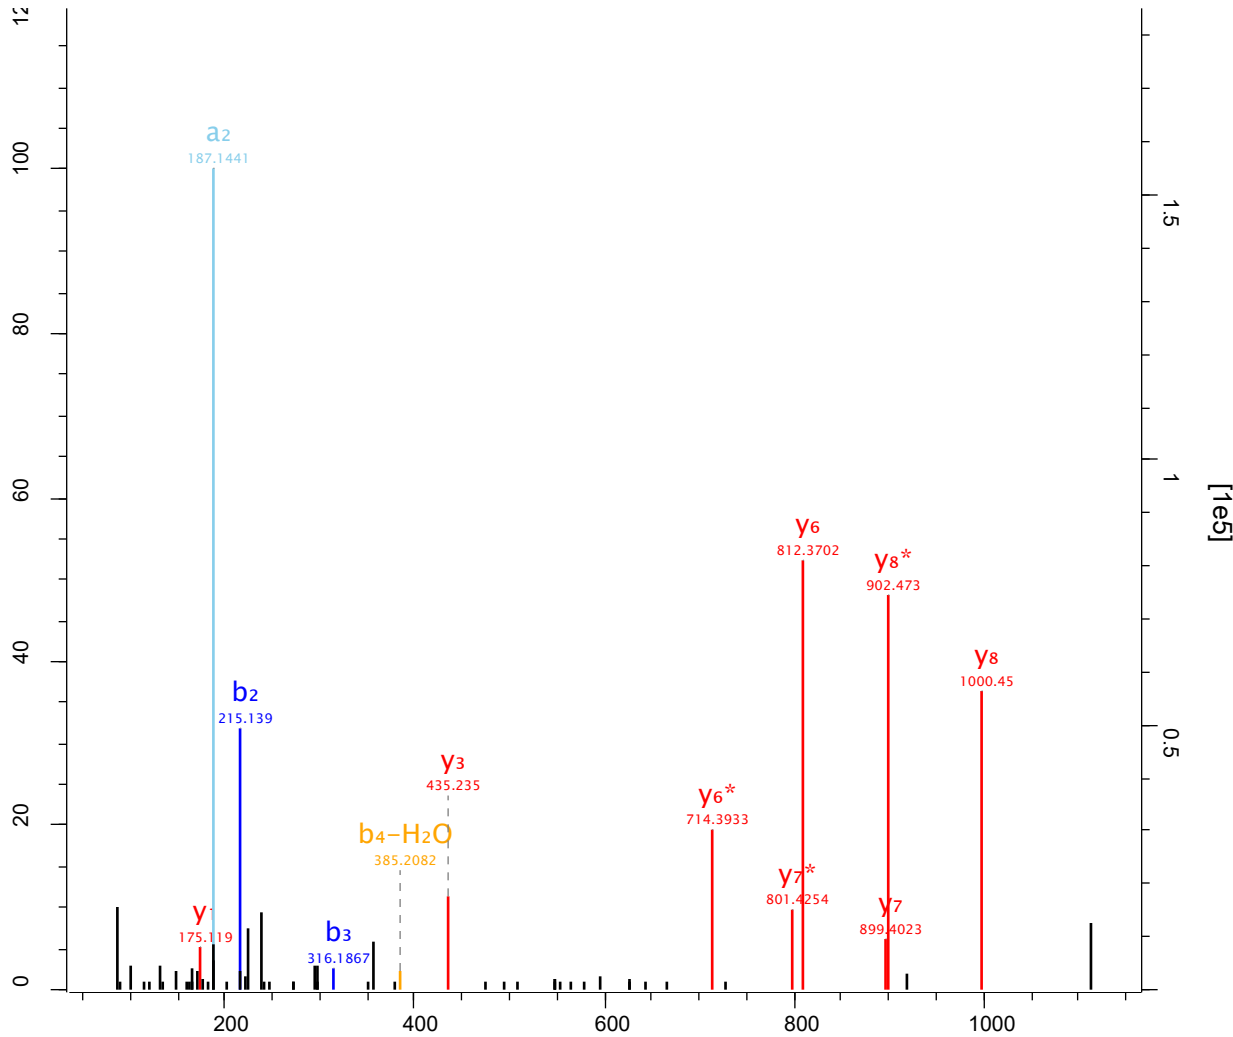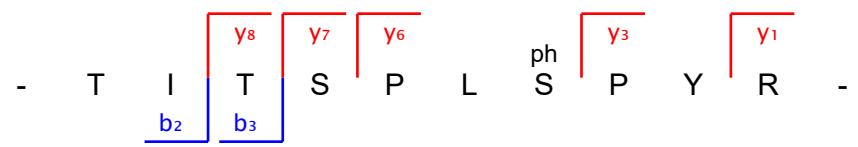

Raw file Scan Method Score m/z  
 sys\_15\_1 24073 FTMS; HCD 57.53 558.62

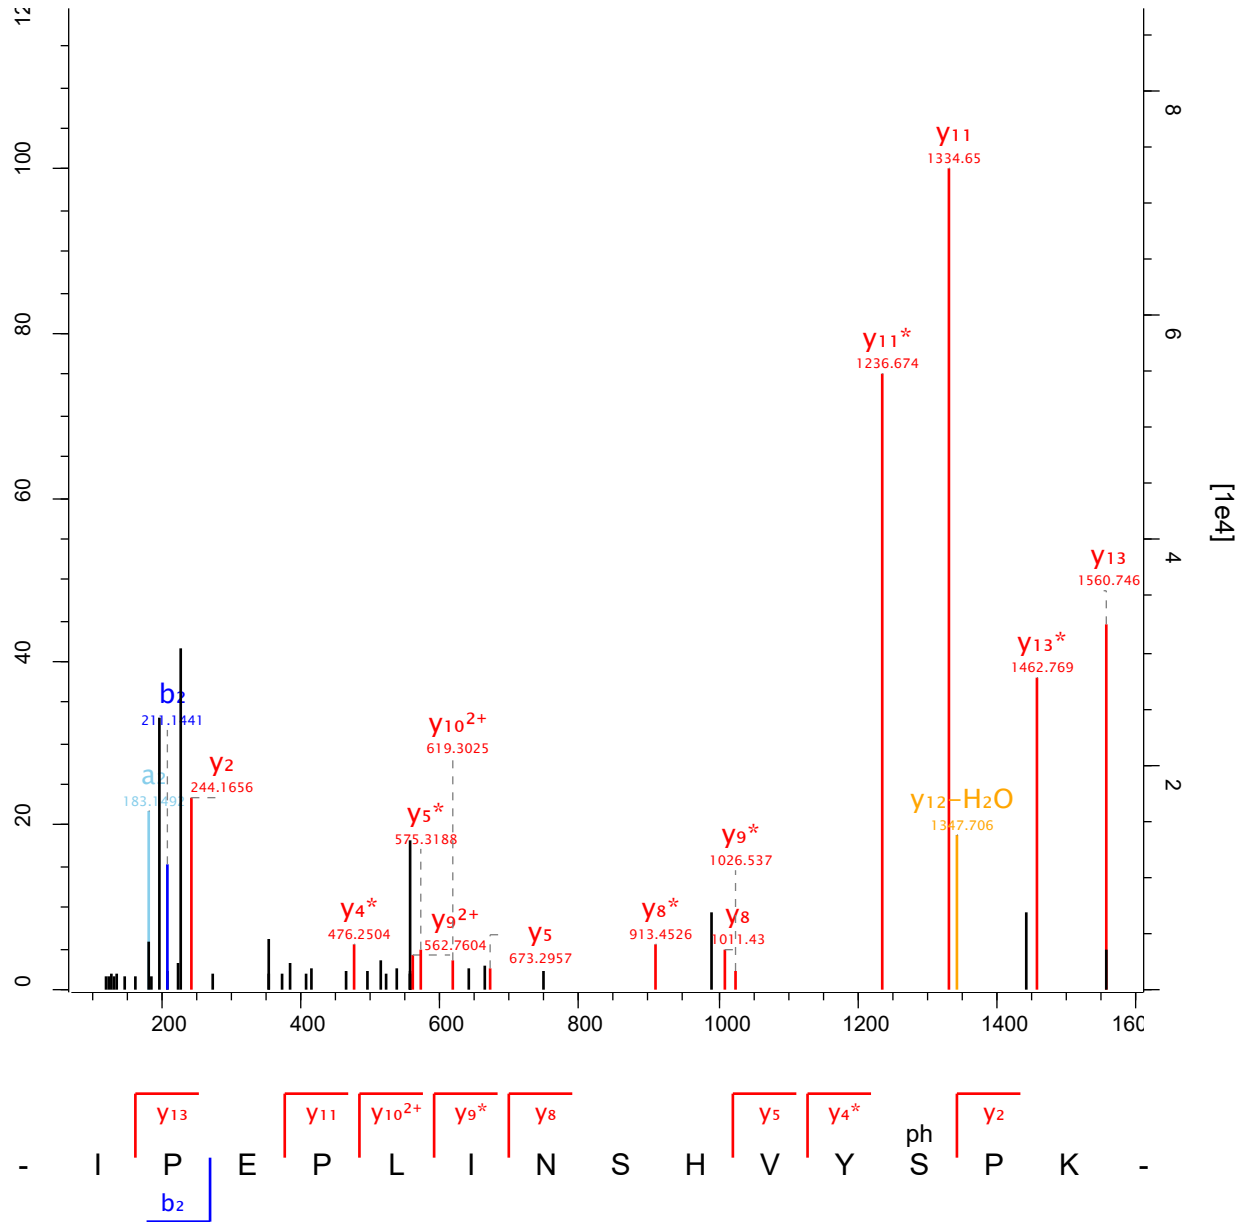

Raw file Scan Method Score m/z  
 sys\_15\_1 24104 FTMS; HCD 95.67 775.03

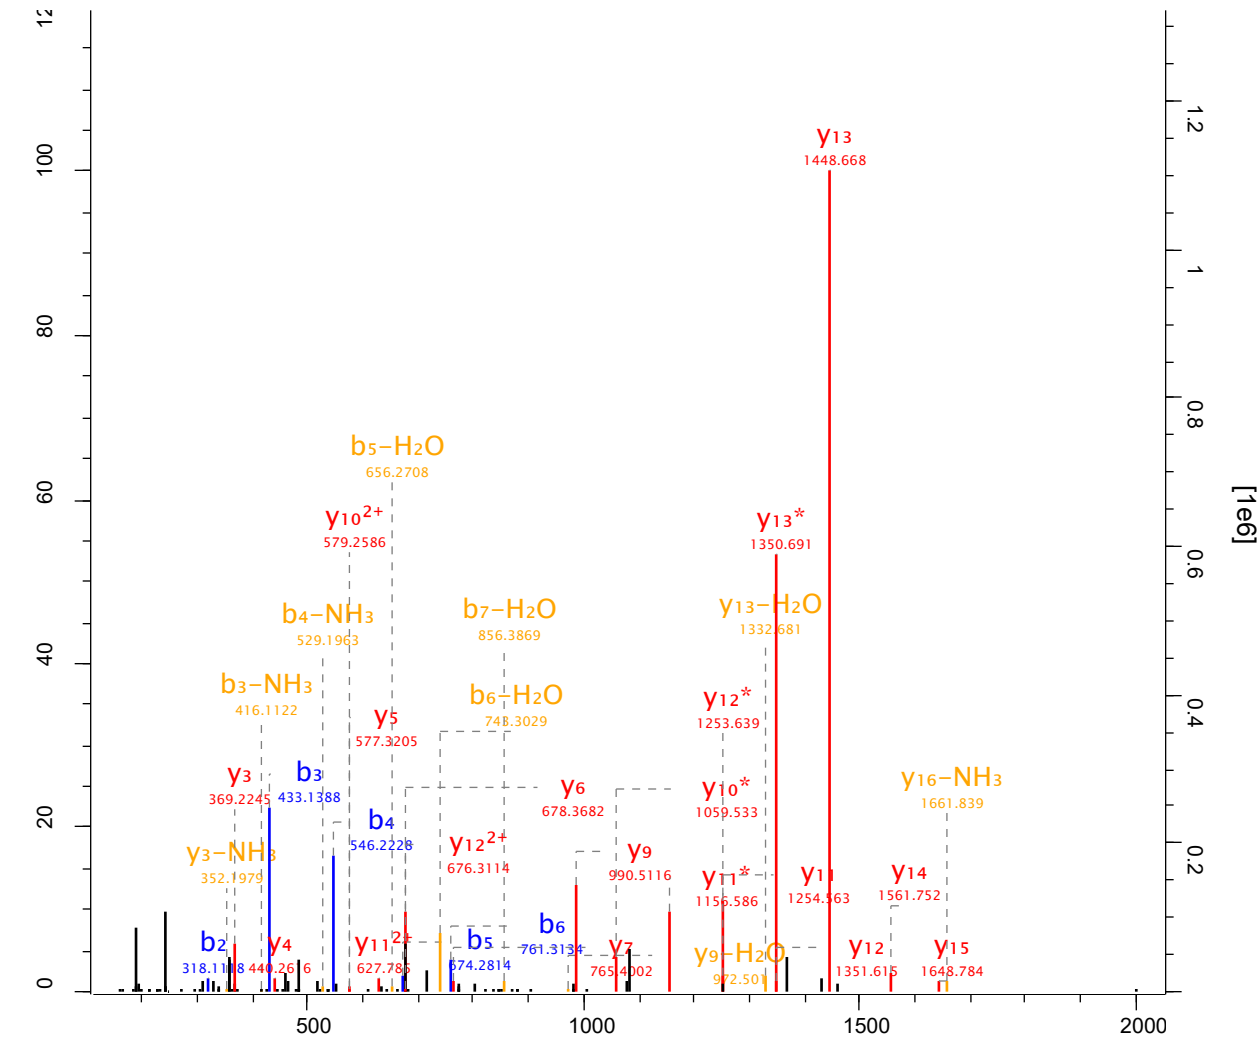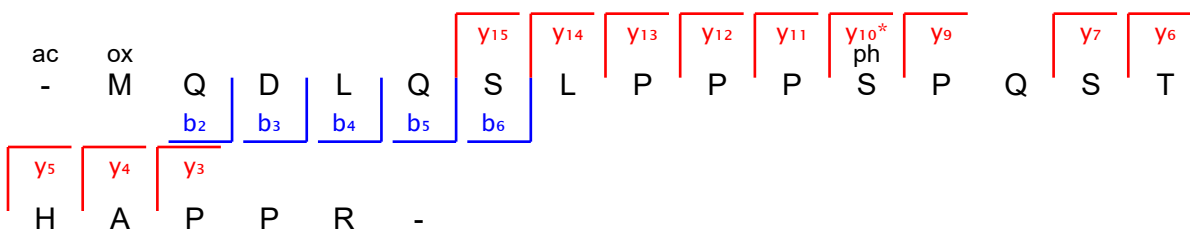



Raw file Scan Method Score m/z  
 sys\_15\_1 24237 FTMS; HCD 57.29 749.33

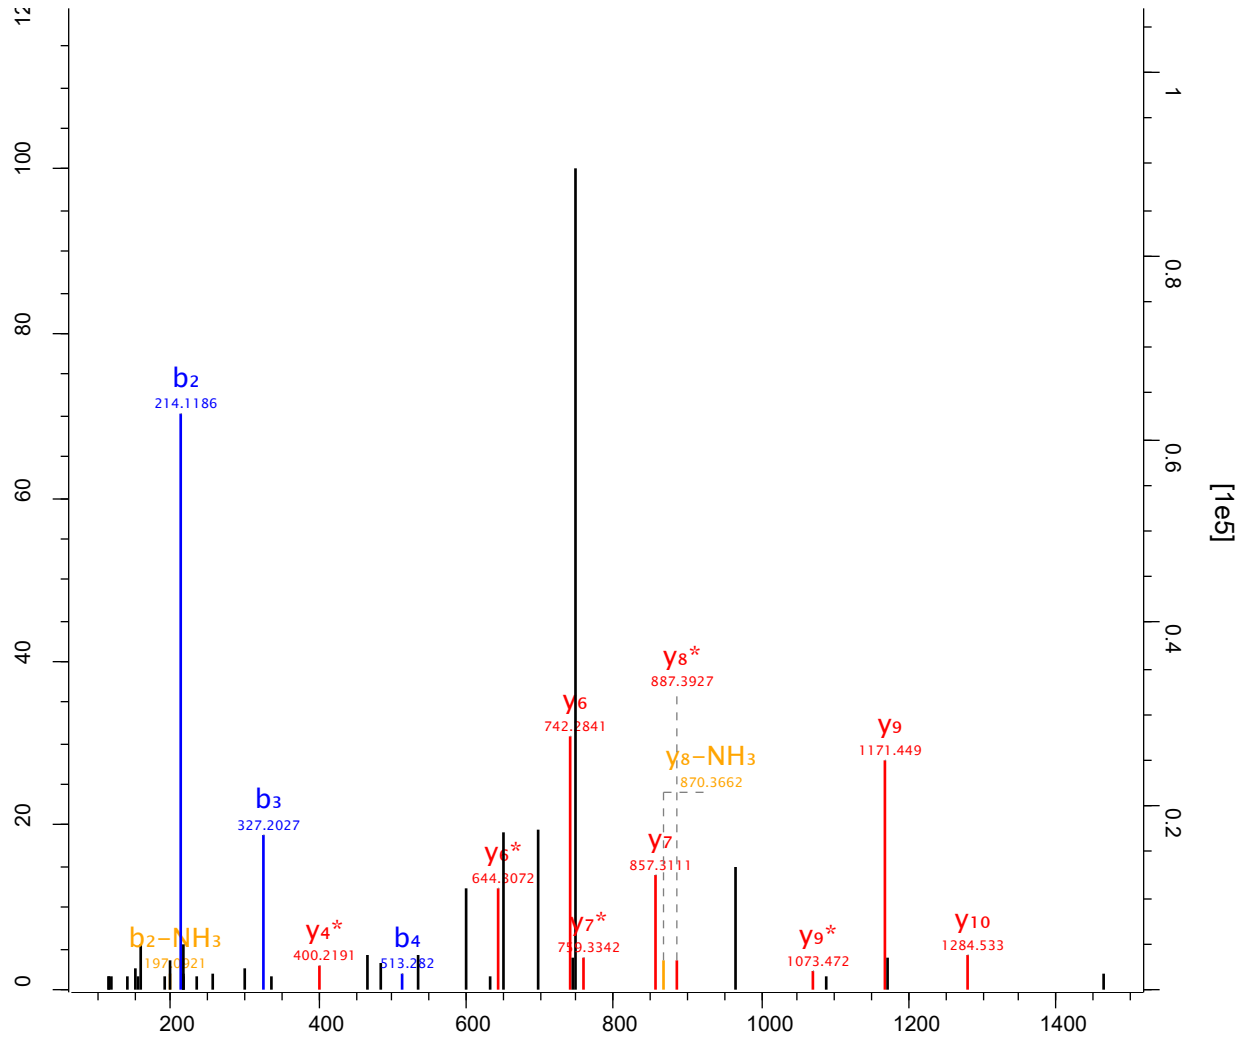

- V N I W Q D P ox M S P S K -

Annotations below the sequence:

- b<sub>2</sub> (under N)
- b<sub>3</sub> (under I)
- b<sub>4</sub> (under W)
- y<sub>10</sub> (above I)
- y<sub>9</sub> (above W)
- y<sub>8</sub>\*
- y<sub>7</sub>
- y<sub>6</sub>
- y<sub>4</sub>\*
- y<sub>3</sub>\*
- y<sub>2</sub>\*

Raw file Scan Method Score m/z  
 sys\_15\_1 24322 FTMS; HCD 78.81 674.8

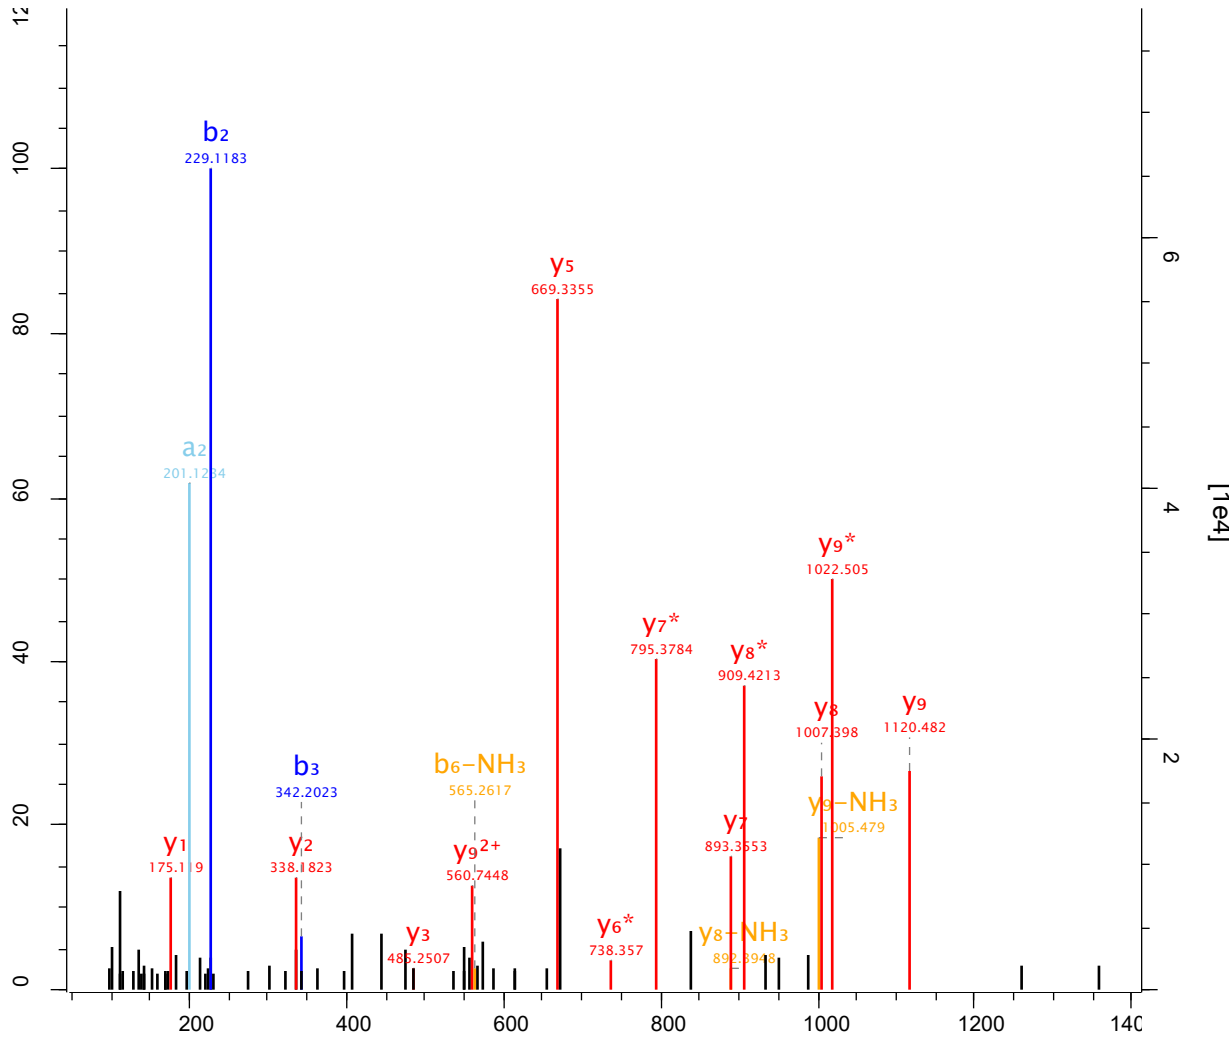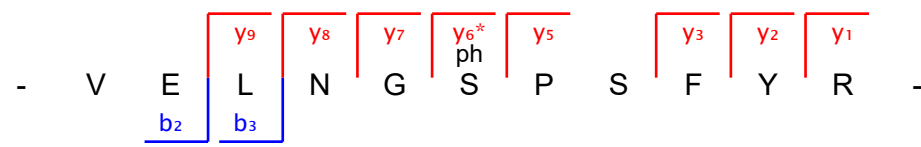

Raw file Scan Method Score m/z  
 sys\_15\_1 24333 FTMS; HCD 65.23 794.84

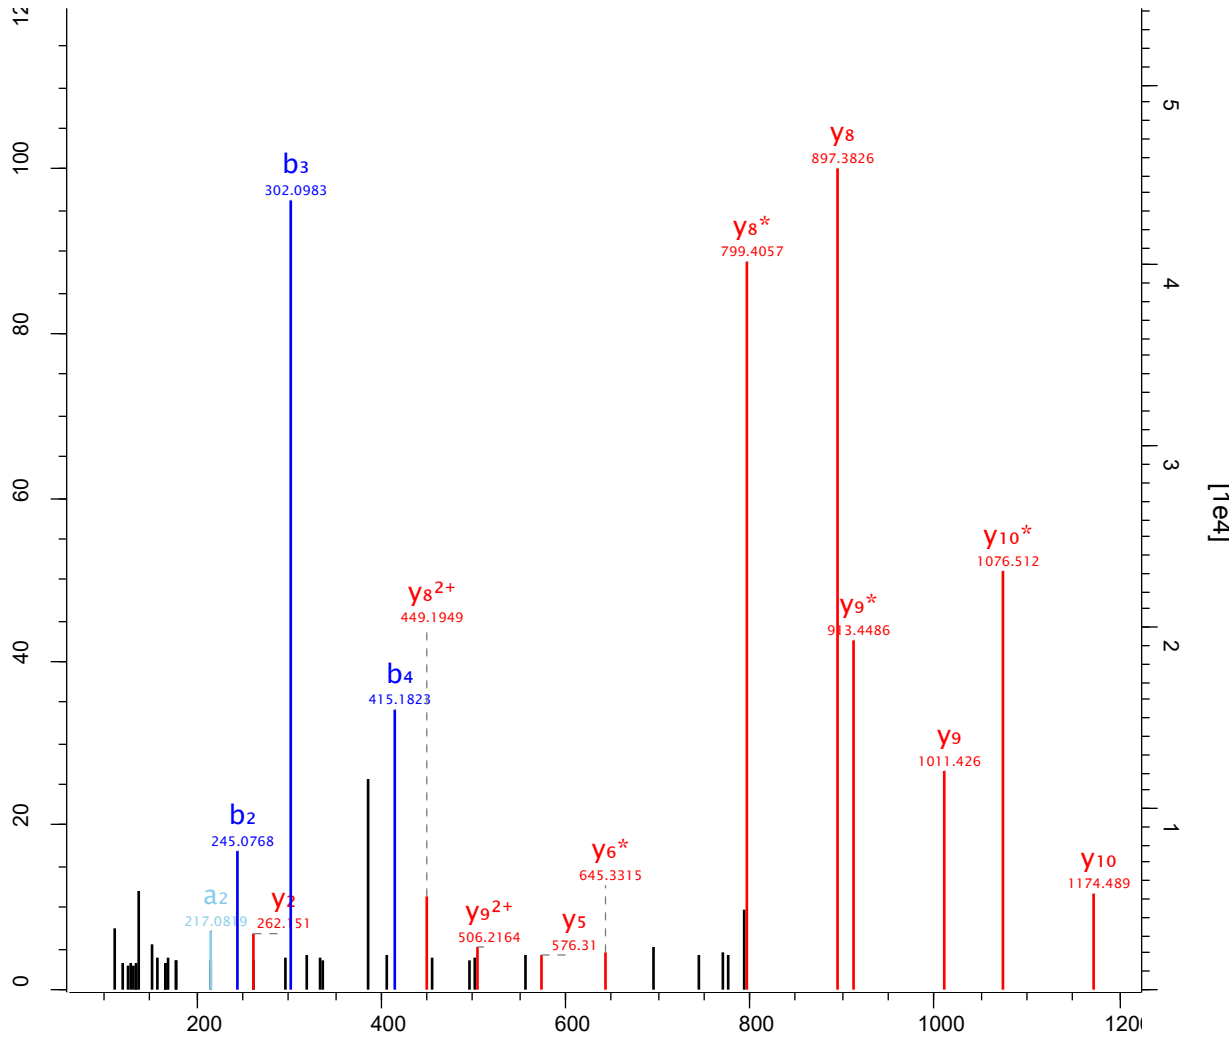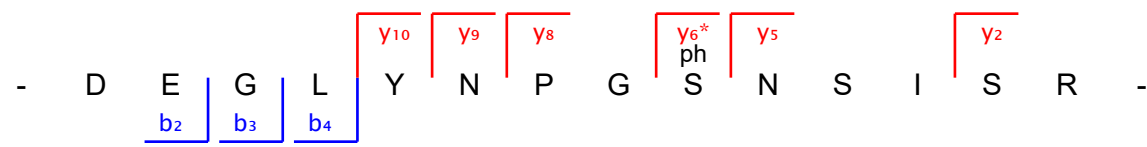

Raw file Scan Method Score m/z  
 sys\_15\_1 24374 FTMS; HCD 71.88 803.69

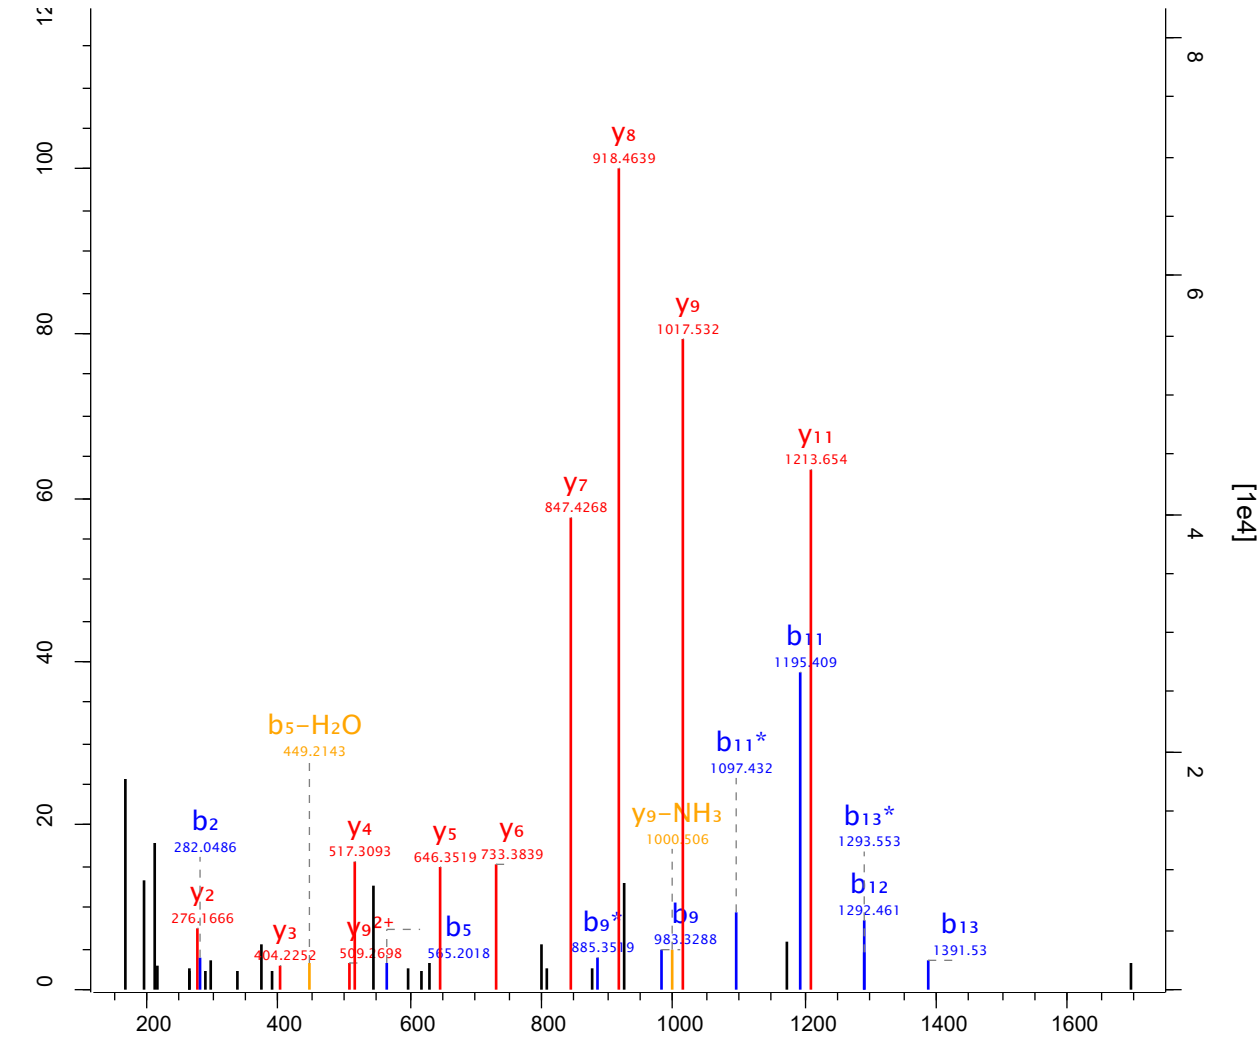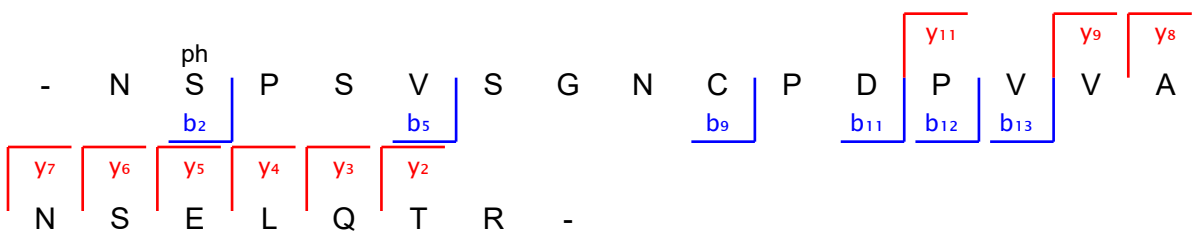

Raw file Scan Method Score m/z  
 sys\_15\_1 24464 FTMS; HCD 238.88 713.84

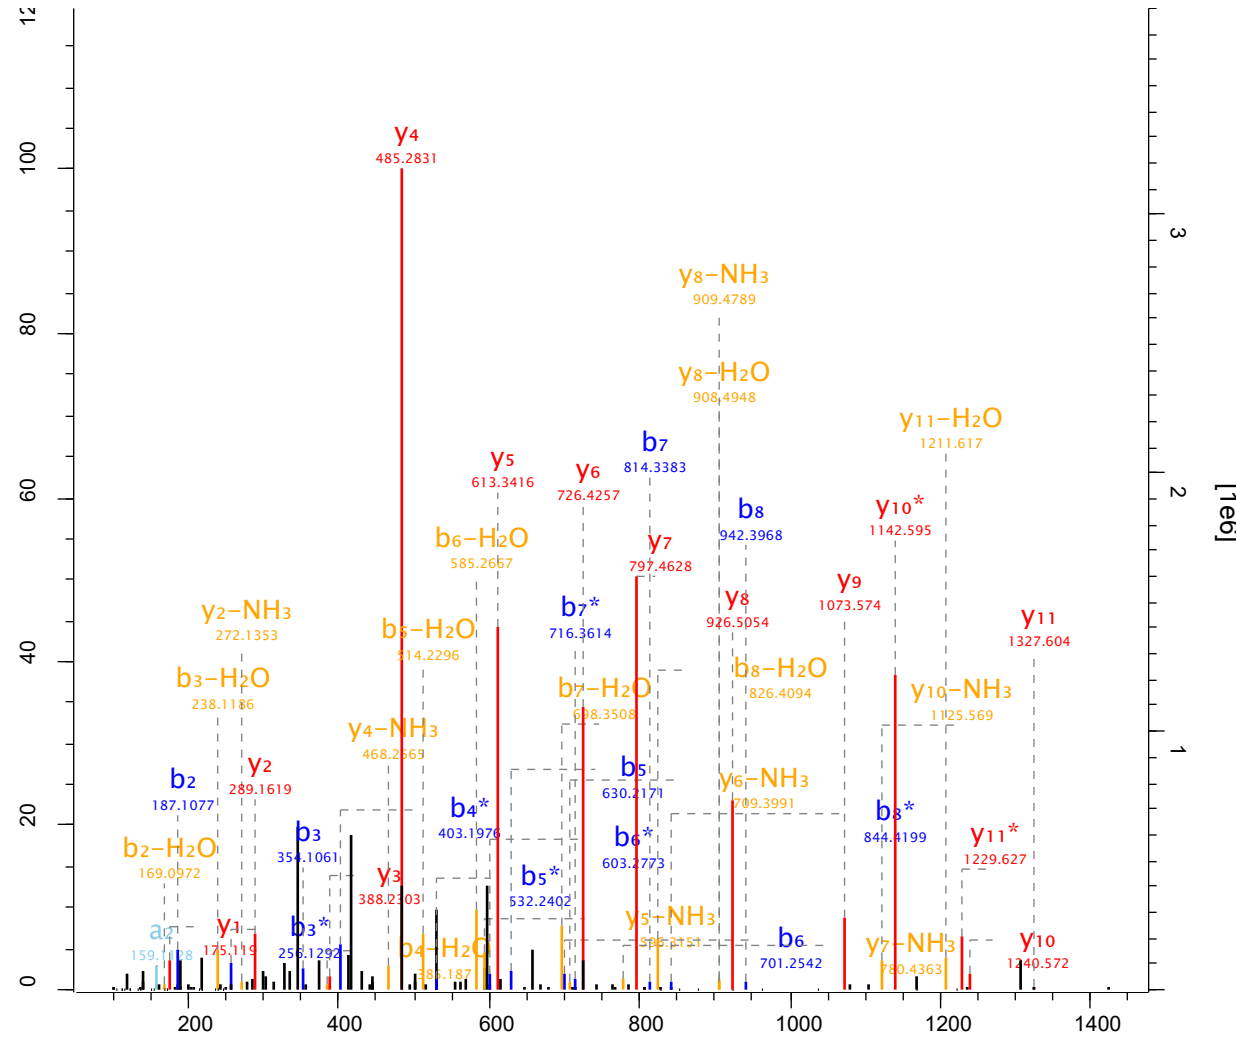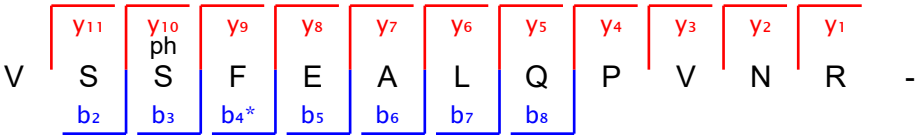

Raw file Scan Method Score m/z  
 sys\_15\_1 24523 FTMS; HCD 127.83 740.27

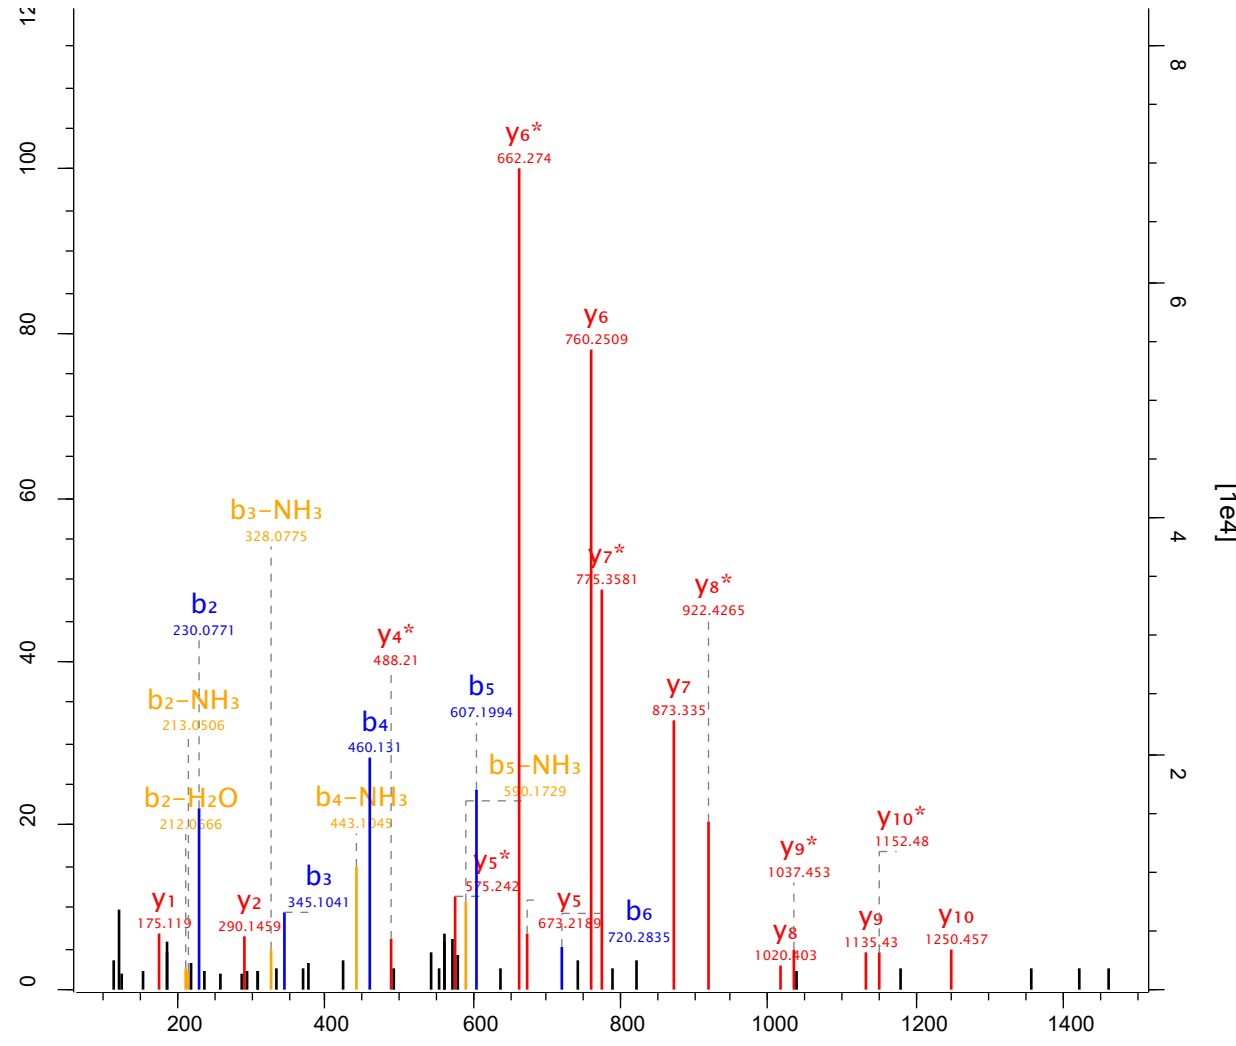

- D N D D F I S S E ph S D R -

b<sub>2</sub>
b<sub>3</sub>
b<sub>4</sub>
b<sub>5</sub>
b<sub>6</sub>
y<sub>10</sub>
y<sub>9</sub>
y<sub>8</sub>
y<sub>7</sub>
y<sub>6</sub>
y<sub>5</sub>
y<sub>4</sub>\*
y<sub>2</sub>
y<sub>1</sub>
